# Supplementary material for: Characterization of bidirectional gene pairs in The Cancer Genome Atlas (TCGA) dataset
Source: PeerJ journal article supplement (doi:10.7717/peerj.7107), 2019-06-17

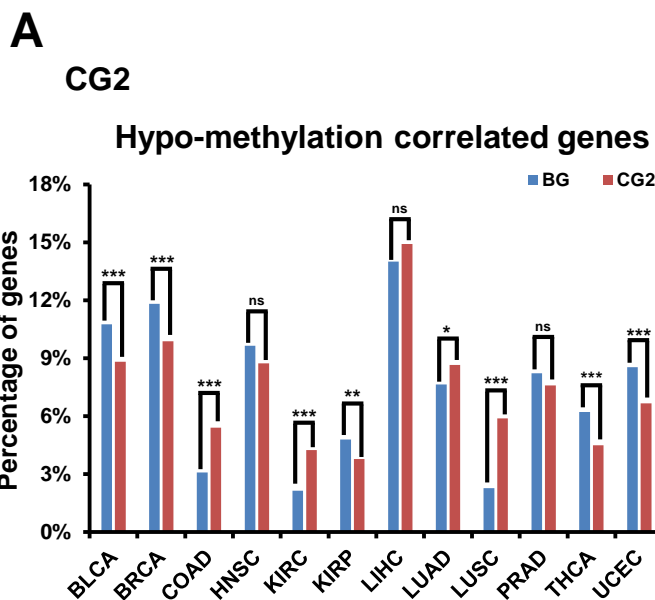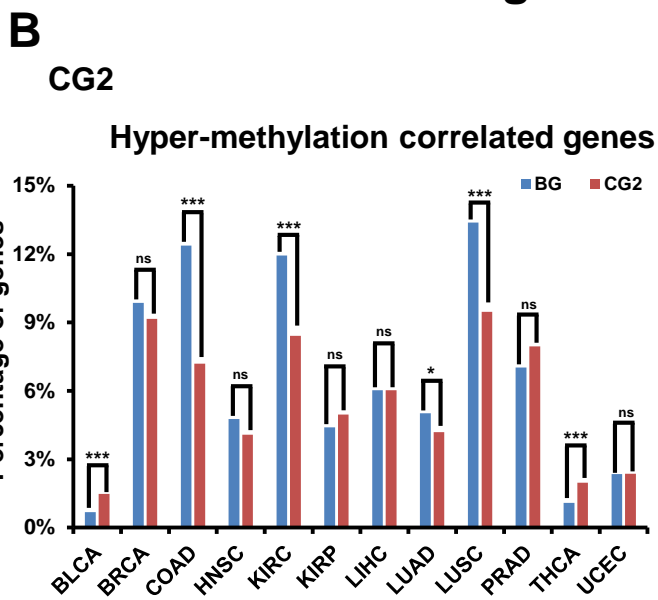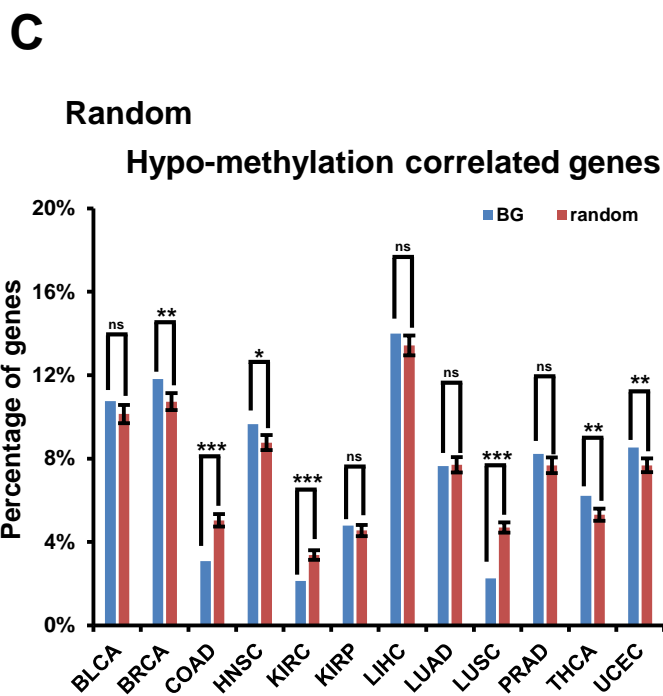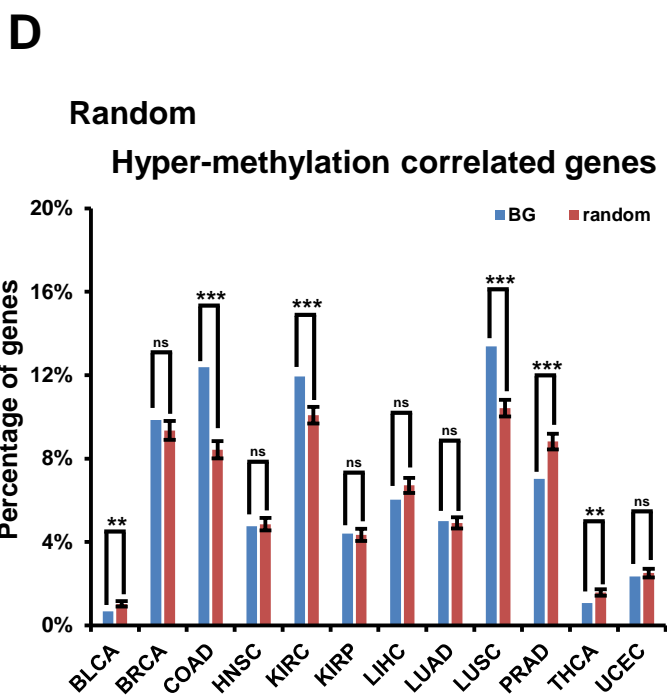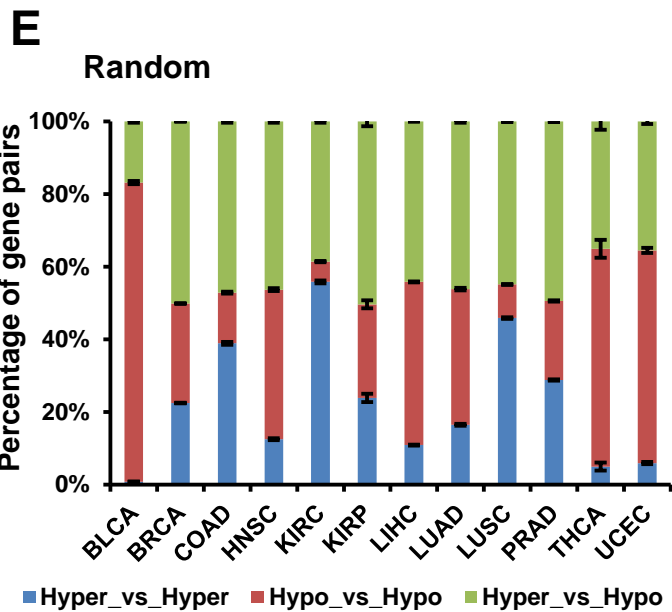

Supplement: Figure_S4.pdf [file Figure_S4.pdf]
