# Supplementary material for: Characterization of bidirectional gene pairs in The Cancer Genome Atlas (TCGA) dataset
Source: PeerJ. 2019 Jun 17;7:e7107. doi: 10.7717/peerj.7107 (PMC6585903; doi:10.7717/peerj.7107)
Supplement: Supplemental Information 6 [file peerj-07-7107-s006.xlsx]

## Sheet: BLCA
gene	gene_type	status
ENSG00000207922.1	miRNA	non-expressed
ENSG00000168872.14	protein_coding	expressed
ENSG00000182272.10	protein_coding	expressed
ENSG00000251686.1	unprocessed_pseudogene	non-expressed
ENSG00000108960.6	protein_coding	expressed
ENSG00000252452.1	snRNA	non-expressed
ENSG00000275075.1	processed_pseudogene	non-expressed
ENSG00000196814.13	protein_coding	expressed
ENSG00000134323.10	protein_coding	expressed
ENSG00000239373.3	misc_RNA	non-expressed
ENSG00000139537.9	protein_coding	expressed
ENSG00000145723.15	protein_coding	expressed
ENSG00000263305.1	lincRNA	non-expressed
ENSG00000204754.3	lincRNA	non-expressed
ENSG00000235011.2	lincRNA	non-expressed
ENSG00000132932.15	protein_coding	expressed
ENSG00000257115.1	protein_coding	non-expressed
ENSG00000272971.1	lincRNA	expressed
ENSG00000196661.3	protein_coding	non-expressed
ENSG00000197465.12	protein_coding	expressed
ENSG00000231812.1	processed_pseudogene	non-expressed
ENSG00000254586.1	lincRNA	non-expressed
ENSG00000145826.7	protein_coding	non-expressed
ENSG00000265778.2	antisense	expressed
ENSG00000200957.1	snRNA	non-expressed
ENSG00000278203.1	miRNA	non-expressed
ENSG00000117090.13	protein_coding	expressed
ENSG00000061492.10	protein_coding	non-expressed
ENSG00000237798.1	antisense	expressed
ENSG00000214248.2	antisense	expressed
ENSG00000213416.3	protein_coding	non-expressed
ENSG00000247151.5	antisense	expressed
ENSG00000214184.3	antisense	expressed
ENSG00000250863.1	lincRNA	expressed
ENSG00000197763.11	protein_coding	expressed
ENSG00000139116.16	protein_coding	expressed
ENSG00000243431.1	processed_pseudogene	expressed
ENSG00000265485.4	lincRNA	expressed
ENSG00000270750.1	lincRNA	expressed
ENSG00000116133.10	protein_coding	expressed
ENSG00000229720.1	lincRNA	expressed
ENSG00000277189.1	miRNA	non-expressed
ENSG00000227207.2	processed_pseudogene	non-expressed
ENSG00000134138.18	protein_coding	expressed
ENSG00000173262.10	protein_coding	expressed
ENSG00000212254.1	snRNA	non-expressed
ENSG00000144381.15	protein_coding	expressed
ENSG00000176896.8	protein_coding	expressed
ENSG00000225471.4	transcribed_processed_pseudogene	expressed
ENSG00000250902.1	antisense	non-expressed
ENSG00000129474.14	protein_coding	expressed
ENSG00000171476.20	protein_coding	expressed
ENSG00000280511.1	lincRNA	non-expressed
ENSG00000234551.1	lincRNA	non-expressed
ENSG00000187621.13	processed_transcript	expressed
ENSG00000138152.8	protein_coding	expressed
ENSG00000241280.1	lincRNA	expressed
ENSG00000227777.1	processed_pseudogene	expressed
ENSG00000177243.3	protein_coding	non-expressed
ENSG00000230838.1	lincRNA	expressed
ENSG00000268051.1	sense_intronic	non-expressed
ENSG00000255121.2	lincRNA	expressed
ENSG00000188467.9	protein_coding	non-expressed
ENSG00000245729.2	lincRNA	non-expressed
ENSG00000178965.12	protein_coding	expressed
ENSG00000277043.1	processed_pseudogene	non-expressed
ENSG00000238304.1	snRNA	non-expressed
ENSG00000178031.14	protein_coding	expressed
ENSG00000172752.13	protein_coding	expressed
ENSG00000067900.6	protein_coding	expressed
ENSG00000011114.13	protein_coding	expressed
ENSG00000130518.15	protein_coding	expressed
ENSG00000101166.14	protein_coding	expressed
ENSG00000103343.11	protein_coding	expressed
ENSG00000140553.15	protein_coding	expressed
ENSG00000203756.6	protein_coding	expressed
ENSG00000266364.1	transcribed_processed_pseudogene	non-expressed
ENSG00000025800.12	protein_coding	expressed
ENSG00000166317.10	protein_coding	expressed
ENSG00000250273.1	processed_pseudogene	non-expressed
ENSG00000243115.3	misc_RNA	non-expressed
ENSG00000184076.12	protein_coding	expressed
ENSG00000134748.12	protein_coding	expressed
ENSG00000227331.1	processed_pseudogene	expressed
ENSG00000261731.2	antisense	non-expressed
ENSG00000240767.3	misc_RNA	non-expressed
ENSG00000176387.6	protein_coding	expressed
ENSG00000241146.1	processed_pseudogene	non-expressed
ENSG00000146278.10	protein_coding	expressed
ENSG00000267679.1	processed_pseudogene	expressed
ENSG00000226200.5	antisense	expressed
ENSG00000162654.8	protein_coding	expressed
ENSG00000270612.1	processed_pseudogene	non-expressed
ENSG00000094804.8	protein_coding	expressed
ENSG00000116209.10	protein_coding	expressed
ENSG00000081853.14	protein_coding	expressed
ENSG00000248514.1	antisense	expressed
ENSG00000237252.1	processed_pseudogene	non-expressed
ENSG00000271100.1	processed_pseudogene	non-expressed
ENSG00000232661.1	antisense	non-expressed
ENSG00000254164.1	lincRNA	expressed
ENSG00000225639.1	processed_pseudogene	non-expressed
ENSG00000224244.1	unprocessed_pseudogene	non-expressed
ENSG00000269954.1	lincRNA	non-expressed
ENSG00000185519.8	protein_coding	expressed
ENSG00000159055.3	protein_coding	expressed
ENSG00000204603.5	lincRNA	non-expressed
ENSG00000201242.1	misc_RNA	non-expressed
ENSG00000242036.1	processed_pseudogene	non-expressed
ENSG00000258747.1	antisense	non-expressed
ENSG00000265744.1	miRNA	non-expressed
ENSG00000230223.5	antisense	non-expressed
ENSG00000119915.4	protein_coding	expressed
ENSG00000281273.1	protein_coding	non-expressed
ENSG00000276037.1	miRNA	non-expressed
ENSG00000103710.9	protein_coding	expressed
ENSG00000254415.3	protein_coding	expressed
ENSG00000255360.1	unprocessed_pseudogene	non-expressed
ENSG00000254710.1	antisense	non-expressed
ENSG00000276786.1	lincRNA	non-expressed
ENSG00000214003.2	processed_pseudogene	expressed
ENSG00000229600.1	lincRNA	non-expressed
ENSG00000234877.2	lincRNA	non-expressed
ENSG00000111674.7	protein_coding	expressed
ENSG00000252575.1	miRNA	non-expressed
ENSG00000278870.1	polymorphic_pseudogene	non-expressed
ENSG00000007168.11	protein_coding	expressed
ENSG00000236615.1	unprocessed_pseudogene	non-expressed
ENSG00000231610.1	processed_pseudogene	non-expressed
ENSG00000233120.1	unprocessed_pseudogene	non-expressed
ENSG00000179673.4	protein_coding	expressed
ENSG00000237115.2	processed_pseudogene	expressed
ENSG00000218809.1	unprocessed_pseudogene	expressed
ENSG00000221234.1	miRNA	non-expressed
ENSG00000231816.1	lincRNA	expressed
ENSG00000259389.2	processed_pseudogene	non-expressed
ENSG00000248873.1	processed_pseudogene	non-expressed
ENSG00000277767.1	lincRNA	expressed
ENSG00000234763.1	lincRNA	expressed
ENSG00000203697.10	protein_coding	expressed
ENSG00000229536.1	lincRNA	expressed
ENSG00000275084.2	snoRNA	expressed
ENSG00000278123.1	snoRNA	non-expressed
ENSG00000201176.1	snRNA	expressed
ENSG00000267383.5	antisense	expressed
ENSG00000145293.13	protein_coding	expressed
ENSG00000139910.18	protein_coding	expressed
ENSG00000228995.1	processed_pseudogene	non-expressed
ENSG00000168389.16	protein_coding	expressed
ENSG00000238561.1	snRNA	non-expressed
ENSG00000206779.1	misc_RNA	non-expressed
ENSG00000105223.17	protein_coding	expressed
ENSG00000164062.11	protein_coding	expressed
ENSG00000272288.4	antisense	expressed
ENSG00000264801.1	transcribed_processed_pseudogene	expressed
ENSG00000237449.1	unitary_pseudogene	non-expressed
ENSG00000253164.4	lincRNA	non-expressed
ENSG00000252316.1	misc_RNA	non-expressed
ENSG00000259856.1	processed_pseudogene	expressed
ENSG00000251546.1	IG_V_gene	expressed
ENSG00000259151.2	transcribed_processed_pseudogene	expressed
ENSG00000239763.2	processed_pseudogene	expressed
ENSG00000198626.14	protein_coding	expressed
ENSG00000256480.1	processed_pseudogene	non-expressed
ENSG00000272902.2	lincRNA	expressed
ENSG00000099953.8	protein_coding	expressed
ENSG00000225407.3	antisense	non-expressed
ENSG00000173275.11	protein_coding	expressed
ENSG00000271933.1	antisense	expressed
ENSG00000249811.2	protein_coding	non-expressed
ENSG00000249404.1	lincRNA	non-expressed
ENSG00000227995.1	processed_pseudogene	non-expressed
ENSG00000222842.1	misc_RNA	non-expressed
ENSG00000275220.1	miRNA	non-expressed
ENSG00000251323.2	lincRNA	expressed
ENSG00000264345.1	lincRNA	non-expressed
ENSG00000223652.2	antisense	expressed
ENSG00000230650.1	processed_pseudogene	expressed
ENSG00000277987.1	lincRNA	non-expressed
ENSG00000134900.10	protein_coding	expressed
ENSG00000207548.2	miRNA	non-expressed
ENSG00000224943.1	lincRNA	non-expressed
ENSG00000278907.1	antisense	non-expressed
ENSG00000262151.1	antisense	non-expressed
ENSG00000259347.4	lincRNA	non-expressed
ENSG00000160396.8	protein_coding	expressed
ENSG00000177888.7	protein_coding	expressed
ENSG00000177990.10	protein_coding	expressed
ENSG00000235750.8	protein_coding	expressed
ENSG00000276150.1	misc_RNA	non-expressed
ENSG00000238448.1	miRNA	non-expressed
ENSG00000159445.11	protein_coding	expressed
ENSG00000267150.1	antisense	expressed
ENSG00000232109.1	processed_pseudogene	expressed
ENSG00000137675.4	protein_coding	expressed
ENSG00000229531.4	antisense	expressed
ENSG00000178458.5	processed_pseudogene	expressed
ENSG00000207559.1	miRNA	non-expressed
ENSG00000006432.14	protein_coding	expressed
ENSG00000260307.2	processed_pseudogene	non-expressed
ENSG00000259115.1	lincRNA	non-expressed
ENSG00000235831.5	antisense	expressed
ENSG00000226804.4	processed_pseudogene	non-expressed
ENSG00000155561.13	protein_coding	expressed
ENSG00000223966.1	antisense	non-expressed
ENSG00000236246.1	processed_pseudogene	non-expressed
ENSG00000106927.10	protein_coding	expressed
ENSG00000224732.1	unprocessed_pseudogene	non-expressed
ENSG00000197959.12	protein_coding	expressed
ENSG00000188313.11	protein_coding	expressed
ENSG00000231990.1	lincRNA	non-expressed
ENSG00000253869.1	processed_pseudogene	expressed
ENSG00000279227.1	TEC	expressed
ENSG00000270493.1	processed_pseudogene	non-expressed
ENSG00000120280.5	protein_coding	expressed
ENSG00000280039.1	TEC	expressed
ENSG00000128641.16	protein_coding	expressed
ENSG00000211944.2	IG_V_gene	non-expressed
ENSG00000255148.2	antisense	non-expressed
ENSG00000153060.6	protein_coding	expressed
ENSG00000270623.1	processed_pseudogene	non-expressed
ENSG00000275467.1	lincRNA	non-expressed
ENSG00000153898.11	protein_coding	expressed
ENSG00000003249.12	protein_coding	expressed
ENSG00000149506.9	protein_coding	expressed
ENSG00000106809.9	protein_coding	expressed
ENSG00000153310.17	protein_coding	expressed
ENSG00000259252.1	lincRNA	non-expressed
ENSG00000259518.1	lincRNA	expressed
ENSG00000218730.1	processed_pseudogene	non-expressed
ENSG00000126583.9	protein_coding	expressed
ENSG00000278128.1	processed_pseudogene	non-expressed
ENSG00000223387.5	lincRNA	expressed
ENSG00000200262.1	misc_RNA	non-expressed
ENSG00000199071.2	miRNA	non-expressed
ENSG00000105255.9	protein_coding	expressed
ENSG00000256609.1	antisense	expressed
ENSG00000258509.1	processed_pseudogene	non-expressed
ENSG00000270558.1	processed_pseudogene	expressed
ENSG00000197024.7	protein_coding	expressed
ENSG00000257355.1	protein_coding	expressed
ENSG00000237460.2	lincRNA	non-expressed
ENSG00000175197.9	protein_coding	expressed
ENSG00000075651.14	protein_coding	expressed
ENSG00000165092.11	protein_coding	expressed
ENSG00000266151.1	miRNA	non-expressed
ENSG00000252959.1	rRNA	non-expressed
ENSG00000233960.1	lincRNA	non-expressed
ENSG00000109625.17	protein_coding	expressed
ENSG00000268030.1	antisense	expressed
ENSG00000221628.1	miRNA	non-expressed
ENSG00000270605.1	antisense	expressed
ENSG00000244361.1	processed_pseudogene	non-expressed
ENSG00000224256.1	processed_pseudogene	non-expressed
ENSG00000266189.1	miRNA	expressed
ENSG00000170745.10	protein_coding	expressed
ENSG00000127995.15	protein_coding	expressed
ENSG00000279153.1	TEC	non-expressed
ENSG00000276692.1	processed_pseudogene	non-expressed
ENSG00000225640.1	lincRNA	non-expressed
ENSG00000227958.1	lincRNA	non-expressed
ENSG00000234354.3	processed_pseudogene	expressed
ENSG00000125868.14	protein_coding	expressed
ENSG00000237807.3	lincRNA	expressed
ENSG00000168137.14	protein_coding	expressed
ENSG00000182472.7	protein_coding	expressed
ENSG00000252983.1	snRNA	non-expressed
ENSG00000275716.1	processed_pseudogene	non-expressed
ENSG00000273497.1	unprocessed_pseudogene	non-expressed
ENSG00000251113.2	processed_pseudogene	non-expressed
ENSG00000213149.3	processed_pseudogene	expressed
ENSG00000173124.13	protein_coding	expressed
ENSG00000141985.8	protein_coding	expressed
ENSG00000168748.12	protein_coding	expressed
ENSG00000004776.10	protein_coding	expressed
ENSG00000228577.1	antisense	expressed
ENSG00000272113.2	misc_RNA	non-expressed
ENSG00000134443.8	protein_coding	expressed
ENSG00000201470.1	misc_RNA	non-expressed
ENSG00000252745.1	rRNA	non-expressed
ENSG00000185792.8	protein_coding	expressed
ENSG00000106327.11	protein_coding	expressed
ENSG00000112837.15	protein_coding	expressed
ENSG00000254860.4	antisense	expressed
ENSG00000267308.1	lincRNA	expressed
ENSG00000180747.14	transcribed_unprocessed_pseudogene	expressed
ENSG00000187122.15	protein_coding	expressed
ENSG00000142089.14	protein_coding	expressed
ENSG00000278348.1	misc_RNA	non-expressed
ENSG00000221016.1	miRNA	non-expressed
ENSG00000187792.4	protein_coding	expressed
ENSG00000124678.16	protein_coding	expressed
ENSG00000186369.8	lincRNA	expressed
ENSG00000239525.1	processed_pseudogene	non-expressed
ENSG00000140525.16	protein_coding	expressed
ENSG00000255545.6	processed_transcript	expressed
ENSG00000240533.3	misc_RNA	non-expressed
ENSG00000254279.1	IG_V_pseudogene	non-expressed
ENSG00000250260.1	lincRNA	non-expressed
ENSG00000164972.11	protein_coding	expressed
ENSG00000244260.1	lincRNA	non-expressed
ENSG00000156261.11	protein_coding	expressed
ENSG00000236844.1	processed_pseudogene	expressed
ENSG00000046653.13	protein_coding	expressed
ENSG00000277861.1	miRNA	non-expressed
ENSG00000145882.9	protein_coding	expressed
ENSG00000229654.1	lincRNA	non-expressed
ENSG00000241188.3	misc_RNA	non-expressed
ENSG00000275229.1	snRNA	non-expressed
ENSG00000200220.1	snRNA	non-expressed
ENSG00000265691.1	miRNA	non-expressed
ENSG00000239465.1	processed_pseudogene	expressed
ENSG00000175143.3	protein_coding	non-expressed
ENSG00000187533.12	protein_coding	non-expressed
ENSG00000277682.1	miRNA	non-expressed
ENSG00000183909.5	unprocessed_pseudogene	non-expressed
ENSG00000265820.1	miRNA	non-expressed
ENSG00000239988.1	processed_pseudogene	non-expressed
ENSG00000232778.1	processed_pseudogene	non-expressed
ENSG00000267452.1	lincRNA	expressed
ENSG00000279925.1	TEC	non-expressed
ENSG00000227140.3	protein_coding	non-expressed
ENSG00000280945.1	miRNA	non-expressed
ENSG00000276764.1	misc_RNA	non-expressed
ENSG00000276678.1	misc_RNA	non-expressed
ENSG00000238644.1	miRNA	non-expressed
ENSG00000221803.1	snoRNA	non-expressed
ENSG00000251400.1	processed_pseudogene	expressed
ENSG00000259374.2	transcribed_processed_pseudogene	expressed
ENSG00000176246.1	protein_coding	non-expressed
ENSG00000131943.16	protein_coding	expressed
ENSG00000198491.3	antisense	expressed
ENSG00000104472.8	protein_coding	expressed
ENSG00000239917.3	unprocessed_pseudogene	expressed
ENSG00000253571.1	processed_pseudogene	non-expressed
ENSG00000224918.1	lincRNA	non-expressed
ENSG00000212073.1	miRNA	non-expressed
ENSG00000212348.1	snRNA	non-expressed
ENSG00000259498.1	antisense	expressed
ENSG00000159259.7	protein_coding	expressed
ENSG00000262877.4	lincRNA	expressed
ENSG00000138600.8	protein_coding	expressed
ENSG00000215326.3	processed_pseudogene	expressed
ENSG00000214853.4	processed_pseudogene	non-expressed
ENSG00000276729.1	misc_RNA	non-expressed
ENSG00000146383.7	protein_coding	non-expressed
ENSG00000250976.1	antisense	non-expressed
ENSG00000201407.1	snoRNA	non-expressed
ENSG00000229862.4	antisense	expressed
ENSG00000257219.4	lincRNA	expressed
ENSG00000184571.12	protein_coding	expressed
ENSG00000237260.1	processed_pseudogene	expressed
ENSG00000237804.1	processed_pseudogene	expressed
ENSG00000264897.1	miRNA	non-expressed
ENSG00000231913.1	processed_pseudogene	non-expressed
ENSG00000279018.1	protein_coding	non-expressed
ENSG00000225637.1	lincRNA	expressed
ENSG00000280636.1	snoRNA	non-expressed
ENSG00000279645.1	TEC	non-expressed
ENSG00000244998.1	antisense	expressed
ENSG00000223728.3	processed_pseudogene	non-expressed
ENSG00000258623.1	antisense	expressed
ENSG00000225520.1	lincRNA	expressed
ENSG00000188755.8	transcribed_unprocessed_pseudogene	non-expressed
ENSG00000232998.1	antisense	non-expressed
ENSG00000163872.14	protein_coding	expressed
ENSG00000165671.17	protein_coding	expressed
ENSG00000135387.18	protein_coding	expressed
ENSG00000272742.1	antisense	non-expressed
ENSG00000225536.2	processed_pseudogene	expressed
ENSG00000229832.1	sense_intronic	expressed
ENSG00000150750.6	protein_coding	expressed
ENSG00000105254.10	protein_coding	expressed
ENSG00000256861.1	protein_coding	non-expressed
ENSG00000235903.6	antisense	expressed
ENSG00000230746.1	lincRNA	non-expressed
ENSG00000231104.7	antisense	expressed
ENSG00000165309.12	protein_coding	expressed
ENSG00000233750.3	processed_pseudogene	expressed
ENSG00000239057.1	miRNA	non-expressed
ENSG00000235875.3	antisense	expressed
ENSG00000138642.13	protein_coding	expressed
ENSG00000233017.2	antisense	expressed
ENSG00000264519.2	misc_RNA	non-expressed
ENSG00000168209.4	protein_coding	expressed
ENSG00000149923.12	protein_coding	expressed
ENSG00000237458.1	processed_pseudogene	non-expressed
ENSG00000088305.17	protein_coding	expressed
ENSG00000214832.5	transcribed_processed_pseudogene	expressed
ENSG00000211681.2	IG_J_gene	non-expressed
ENSG00000260113.3	processed_pseudogene	non-expressed
ENSG00000255136.2	lincRNA	non-expressed
ENSG00000133639.4	protein_coding	expressed
ENSG00000243147.6	protein_coding	expressed
ENSG00000199237.1	snRNA	non-expressed
ENSG00000207127.1	misc_RNA	non-expressed
ENSG00000108591.8	protein_coding	expressed
ENSG00000211538.1	miRNA	non-expressed
ENSG00000265639.1	processed_pseudogene	non-expressed
ENSG00000250300.1	unprocessed_pseudogene	non-expressed
ENSG00000280401.1	TEC	expressed
ENSG00000274390.1	miRNA	non-expressed
ENSG00000258963.1	unprocessed_pseudogene	non-expressed
ENSG00000199634.1	snRNA	non-expressed
ENSG00000222997.1	misc_RNA	non-expressed
ENSG00000254290.1	lincRNA	expressed
ENSG00000279058.1	protein_coding	expressed
ENSG00000249284.1	processed_pseudogene	non-expressed
ENSG00000273694.1	snRNA	non-expressed
ENSG00000271397.1	processed_pseudogene	non-expressed
ENSG00000142945.11	protein_coding	expressed
ENSG00000242278.1	processed_pseudogene	non-expressed
ENSG00000199218.1	misc_RNA	non-expressed
ENSG00000201523.1	rRNA	non-expressed
ENSG00000156414.17	protein_coding	expressed
ENSG00000134086.7	protein_coding	expressed
ENSG00000132640.13	protein_coding	expressed
ENSG00000167634.11	protein_coding	expressed
ENSG00000204991.9	protein_coding	expressed
ENSG00000240791.1	unprocessed_pseudogene	non-expressed
ENSG00000220113.2	processed_pseudogene	non-expressed
ENSG00000253203.5	transcribed_unprocessed_pseudogene	expressed
ENSG00000225302.2	antisense	expressed
ENSG00000111843.12	protein_coding	expressed
ENSG00000258591.2	processed_pseudogene	expressed
ENSG00000268812.3	antisense	expressed
ENSG00000274092.1	antisense	expressed
ENSG00000149243.14	protein_coding	expressed
ENSG00000250173.1	lincRNA	non-expressed
ENSG00000241956.8	antisense	expressed
ENSG00000250622.1	processed_pseudogene	non-expressed
ENSG00000248521.1	processed_pseudogene	non-expressed
ENSG00000201348.1	snoRNA	non-expressed
ENSG00000204175.5	protein_coding	expressed
ENSG00000225352.1	processed_pseudogene	non-expressed
ENSG00000101966.11	protein_coding	expressed
ENSG00000253054.1	snRNA	non-expressed
ENSG00000215483.7	lincRNA	expressed
ENSG00000207387.1	misc_RNA	non-expressed
ENSG00000213924.3	processed_pseudogene	non-expressed
ENSG00000162616.8	protein_coding	expressed
ENSG00000183474.14	protein_coding	expressed
ENSG00000228265.4	lincRNA	expressed
ENSG00000258926.1	antisense	expressed
ENSG00000136697.11	protein_coding	expressed
ENSG00000214282.3	processed_pseudogene	expressed
ENSG00000219361.1	processed_pseudogene	expressed
ENSG00000204837.3	unprocessed_pseudogene	expressed
ENSG00000132622.9	protein_coding	expressed
ENSG00000243220.1	antisense	non-expressed
ENSG00000236885.1	lincRNA	non-expressed
ENSG00000114737.14	protein_coding	expressed
ENSG00000135749.17	protein_coding	expressed
ENSG00000261468.1	sense_overlapping	expressed
ENSG00000130427.2	protein_coding	expressed
ENSG00000231628.1	antisense	expressed
ENSG00000189319.12	protein_coding	expressed
ENSG00000251257.2	antisense	expressed
ENSG00000155229.19	protein_coding	expressed
ENSG00000165409.14	protein_coding	expressed
ENSG00000188869.11	protein_coding	expressed
ENSG00000201179.1	snRNA	non-expressed
ENSG00000235203.2	unprocessed_pseudogene	non-expressed
ENSG00000279319.1	TEC	expressed
ENSG00000131378.12	protein_coding	expressed
ENSG00000231963.1	antisense	non-expressed
ENSG00000227186.1	antisense	non-expressed
ENSG00000254070.1	processed_pseudogene	non-expressed
ENSG00000158485.9	protein_coding	expressed
ENSG00000229192.5	lincRNA	non-expressed
ENSG00000274420.1	misc_RNA	non-expressed
ENSG00000224411.3	processed_pseudogene	expressed
ENSG00000266304.1	lincRNA	expressed
ENSG00000225397.1	processed_pseudogene	non-expressed
ENSG00000226360.5	processed_pseudogene	expressed
ENSG00000267301.1	processed_pseudogene	expressed
ENSG00000226609.1	antisense	expressed
ENSG00000217539.2	processed_pseudogene	non-expressed
ENSG00000233996.1	processed_pseudogene	expressed
ENSG00000269191.1	antisense	expressed
ENSG00000144935.13	protein_coding	expressed
ENSG00000184659.5	protein_coding	non-expressed
ENSG00000251401.2	processed_pseudogene	non-expressed
ENSG00000225807.1	lincRNA	non-expressed
ENSG00000227513.1	processed_pseudogene	non-expressed
ENSG00000213750.4	processed_pseudogene	expressed
ENSG00000239659.2	processed_pseudogene	non-expressed
ENSG00000241693.2	misc_RNA	expressed
ENSG00000278703.1	lincRNA	expressed
ENSG00000109133.11	protein_coding	expressed
ENSG00000138028.13	protein_coding	expressed
ENSG00000075420.11	protein_coding	expressed
ENSG00000169509.5	protein_coding	expressed
ENSG00000221725.1	snRNA	non-expressed
ENSG00000249045.1	unprocessed_pseudogene	non-expressed
ENSG00000271173.1	processed_pseudogene	non-expressed
ENSG00000257150.2	transcribed_processed_pseudogene	expressed
ENSG00000125089.15	protein_coding	expressed
ENSG00000242607.1	processed_pseudogene	expressed
ENSG00000256343.6	lincRNA	non-expressed
ENSG00000275510.1	miRNA	non-expressed
ENSG00000271468.1	processed_pseudogene	non-expressed
ENSG00000266922.1	sense_intronic	expressed
ENSG00000254076.1	processed_pseudogene	non-expressed
ENSG00000252218.1	scaRNA	non-expressed
ENSG00000171612.6	protein_coding	expressed
ENSG00000231341.1	processed_pseudogene	non-expressed
ENSG00000228569.1	lincRNA	non-expressed
ENSG00000198106.8	lincRNA	expressed
ENSG00000240800.1	transcribed_unprocessed_pseudogene	non-expressed
ENSG00000166845.12	protein_coding	expressed
ENSG00000200530.1	snoRNA	non-expressed
ENSG00000123999.4	protein_coding	expressed
ENSG00000277468.1	misc_RNA	non-expressed
ENSG00000176922.3	protein_coding	non-expressed
ENSG00000221910.2	protein_coding	non-expressed
ENSG00000260866.1	unprocessed_pseudogene	non-expressed
ENSG00000215895.4	processed_pseudogene	expressed
ENSG00000221354.1	miRNA	non-expressed
ENSG00000100288.18	protein_coding	expressed
ENSG00000251286.2	processed_pseudogene	non-expressed
ENSG00000145908.11	protein_coding	expressed
ENSG00000234848.1	antisense	expressed
ENSG00000275992.1	misc_RNA	non-expressed
ENSG00000146122.15	protein_coding	expressed
ENSG00000163297.15	protein_coding	expressed
ENSG00000254531.1	lincRNA	expressed
ENSG00000253671.1	processed_transcript	expressed
ENSG00000269392.1	antisense	expressed
ENSG00000256197.1	sense_intronic	non-expressed
ENSG00000214835.3	processed_pseudogene	non-expressed
ENSG00000260086.2	lincRNA	expressed
ENSG00000279685.2	sense_intronic	non-expressed
ENSG00000244278.1	lincRNA	non-expressed
ENSG00000279656.1	TEC	expressed
ENSG00000198983.1	miRNA	non-expressed
ENSG00000171481.3	protein_coding	non-expressed
ENSG00000115523.15	protein_coding	expressed
ENSG00000279786.1	TEC	expressed
ENSG00000132204.12	lincRNA	expressed
ENSG00000257259.1	lincRNA	non-expressed
ENSG00000235040.1	unprocessed_pseudogene	non-expressed
ENSG00000240591.1	antisense	expressed
ENSG00000112576.11	protein_coding	expressed
ENSG00000082068.7	protein_coding	expressed
ENSG00000240993.3	misc_RNA	non-expressed
ENSG00000274685.1	lincRNA	expressed
ENSG00000206077.9	protein_coding	expressed
ENSG00000226533.1	antisense	non-expressed
ENSG00000104765.13	protein_coding	expressed
ENSG00000259950.1	processed_pseudogene	non-expressed
ENSG00000230304.1	processed_pseudogene	non-expressed
ENSG00000266276.2	miRNA	non-expressed
ENSG00000171671.6	antisense	non-expressed
ENSG00000259604.4	lincRNA	non-expressed
ENSG00000265043.1	lincRNA	non-expressed
ENSG00000226964.1	processed_pseudogene	expressed
ENSG00000063015.18	protein_coding	expressed
ENSG00000140612.12	protein_coding	expressed
ENSG00000227800.1	IG_D_gene	non-expressed
ENSG00000163482.10	protein_coding	expressed
ENSG00000171401.13	protein_coding	expressed
ENSG00000242668.3	misc_RNA	non-expressed
ENSG00000224914.2	lincRNA	expressed
ENSG00000273117.1	lincRNA	expressed
ENSG00000099715.13	protein_coding	expressed
ENSG00000224530.1	processed_pseudogene	non-expressed
ENSG00000263776.1	snoRNA	non-expressed
ENSG00000279174.1	TEC	expressed
ENSG00000277490.1	processed_pseudogene	non-expressed
ENSG00000125845.6	protein_coding	expressed
ENSG00000272909.1	antisense	expressed
ENSG00000236648.1	lincRNA	non-expressed
ENSG00000280953.1	lincRNA	expressed
ENSG00000271187.1	processed_pseudogene	non-expressed
ENSG00000252091.1	snRNA	non-expressed
ENSG00000278946.1	antisense	non-expressed
ENSG00000200817.1	snRNA	non-expressed
ENSG00000212378.1	snoRNA	non-expressed
ENSG00000230542.4	lincRNA	expressed
ENSG00000272953.1	lincRNA	expressed
ENSG00000233887.1	processed_pseudogene	non-expressed
ENSG00000202398.1	snRNA	non-expressed
ENSG00000206638.1	snRNA	non-expressed
ENSG00000227775.3	transcribed_processed_pseudogene	expressed
ENSG00000087274.15	protein_coding	expressed
ENSG00000162704.14	protein_coding	expressed
ENSG00000249501.1	unprocessed_pseudogene	non-expressed
ENSG00000228392.1	lincRNA	non-expressed
ENSG00000205944.10	protein_coding	non-expressed
ENSG00000183318.10	protein_coding	non-expressed
ENSG00000051180.15	protein_coding	expressed
ENSG00000201218.1	misc_RNA	non-expressed
ENSG00000269243.1	antisense	expressed
ENSG00000258780.1	unprocessed_pseudogene	non-expressed
ENSG00000225559.1	lincRNA	non-expressed
ENSG00000216206.1	miRNA	non-expressed
ENSG00000128564.6	protein_coding	expressed
ENSG00000223907.1	lincRNA	expressed
ENSG00000276513.1	miRNA	non-expressed
ENSG00000236511.1	lincRNA	non-expressed
ENSG00000237129.1	processed_pseudogene	non-expressed
ENSG00000239809.1	processed_pseudogene	non-expressed
ENSG00000270075.1	antisense	non-expressed
ENSG00000274584.1	unprocessed_pseudogene	expressed
ENSG00000136158.9	protein_coding	expressed
ENSG00000199065.2	miRNA	non-expressed
ENSG00000223244.1	miRNA	non-expressed
ENSG00000142867.11	protein_coding	expressed
ENSG00000261813.2	processed_pseudogene	non-expressed
ENSG00000116830.10	protein_coding	expressed
ENSG00000253561.1	lincRNA	non-expressed
ENSG00000267000.1	antisense	non-expressed
ENSG00000278586.1	processed_pseudogene	non-expressed
ENSG00000230231.1	unprocessed_pseudogene	expressed
ENSG00000272182.1	antisense	expressed
ENSG00000176142.11	protein_coding	expressed
ENSG00000243633.3	misc_RNA	non-expressed
ENSG00000255120.4	antisense	expressed
ENSG00000186417.12	protein_coding	expressed
ENSG00000255124.1	lincRNA	non-expressed
ENSG00000229067.1	processed_pseudogene	non-expressed
ENSG00000248564.1	processed_pseudogene	non-expressed
ENSG00000165555.8	protein_coding	expressed
ENSG00000259579.1	lincRNA	non-expressed
ENSG00000261542.1	lincRNA	expressed
ENSG00000227602.1	sense_intronic	non-expressed
ENSG00000225331.1	lincRNA	expressed
ENSG00000233884.1	antisense	expressed
ENSG00000240423.1	lincRNA	expressed
ENSG00000222205.1	rRNA	non-expressed
ENSG00000233220.3	lincRNA	expressed
ENSG00000143125.5	protein_coding	expressed
ENSG00000260276.2	antisense	expressed
ENSG00000220553.1	processed_pseudogene	non-expressed
ENSG00000257766.1	antisense	non-expressed
ENSG00000221385.1	miRNA	non-expressed
ENSG00000248333.6	protein_coding	expressed
ENSG00000112559.12	protein_coding	expressed
ENSG00000235526.1	antisense	non-expressed
ENSG00000250071.1	processed_pseudogene	non-expressed
ENSG00000277854.1	miRNA	non-expressed
ENSG00000207138.1	snRNA	non-expressed
ENSG00000143493.11	protein_coding	expressed
ENSG00000129910.6	protein_coding	expressed
ENSG00000182873.5	antisense	expressed
ENSG00000145604.14	protein_coding	expressed
ENSG00000182901.14	protein_coding	expressed
ENSG00000253267.4	antisense	non-expressed
ENSG00000207518.1	snRNA	non-expressed
ENSG00000186788.11	transcribed_unprocessed_pseudogene	non-expressed
ENSG00000230661.1	processed_pseudogene	non-expressed
ENSG00000225972.1	unprocessed_pseudogene	expressed
ENSG00000266127.1	processed_pseudogene	non-expressed
ENSG00000235369.1	processed_pseudogene	expressed
ENSG00000264765.1	lincRNA	non-expressed
ENSG00000266538.1	lincRNA	expressed
ENSG00000253497.1	IG_V_pseudogene	expressed
ENSG00000226014.1	processed_pseudogene	non-expressed
ENSG00000259318.1	processed_pseudogene	expressed
ENSG00000255116.2	processed_pseudogene	non-expressed
ENSG00000275121.1	processed_pseudogene	non-expressed
ENSG00000223442.1	antisense	expressed
ENSG00000243195.1	processed_pseudogene	non-expressed
ENSG00000185842.13	protein_coding	expressed
ENSG00000265428.1	processed_pseudogene	non-expressed
ENSG00000174442.10	protein_coding	expressed
ENSG00000203812.2	protein_coding	non-expressed
ENSG00000266978.1	antisense	non-expressed
ENSG00000229208.1	unprocessed_pseudogene	non-expressed
ENSG00000257588.1	antisense	expressed
ENSG00000260601.1	sense_intronic	non-expressed
ENSG00000280298.1	protein_coding	expressed
ENSG00000221602.1	miRNA	non-expressed
ENSG00000268447.4	protein_coding	non-expressed
ENSG00000162783.10	protein_coding	expressed
ENSG00000126106.12	protein_coding	expressed
ENSG00000254901.6	protein_coding	expressed
ENSG00000268388.4	lincRNA	expressed
ENSG00000274210.1	snRNA	expressed
ENSG00000279390.1	TEC	expressed
ENSG00000177551.5	protein_coding	expressed
ENSG00000184863.9	protein_coding	expressed
ENSG00000138069.15	protein_coding	expressed
ENSG00000254361.1	lincRNA	non-expressed
ENSG00000280927.1	antisense	expressed
ENSG00000058272.14	protein_coding	expressed
ENSG00000160460.14	protein_coding	expressed
ENSG00000253559.1	antisense	expressed
ENSG00000141753.6	protein_coding	expressed
ENSG00000278107.1	lincRNA	expressed
ENSG00000127528.5	protein_coding	expressed
ENSG00000236108.1	processed_pseudogene	non-expressed
ENSG00000277144.1	lincRNA	expressed
ENSG00000255583.2	transcribed_unprocessed_pseudogene	expressed
ENSG00000253696.2	lincRNA	expressed
ENSG00000200673.1	misc_RNA	non-expressed
ENSG00000174021.9	protein_coding	expressed
ENSG00000234579.1	antisense	non-expressed
ENSG00000275690.1	miRNA	non-expressed
ENSG00000236358.1	antisense	expressed
ENSG00000280607.1	processed_transcript	non-expressed
ENSG00000248984.1	antisense	non-expressed
ENSG00000242329.1	processed_pseudogene	non-expressed
ENSG00000181404.15	protein_coding	expressed
ENSG00000119812.17	protein_coding	expressed
ENSG00000249807.1	lincRNA	non-expressed
ENSG00000260799.1	processed_pseudogene	expressed
ENSG00000100258.16	protein_coding	expressed
ENSG00000185668.6	protein_coding	expressed
ENSG00000257139.1	lincRNA	non-expressed
ENSG00000075073.13	protein_coding	expressed
ENSG00000260146.1	processed_pseudogene	non-expressed
ENSG00000198393.6	protein_coding	expressed
ENSG00000231346.4	lincRNA	expressed
ENSG00000215023.2	antisense	non-expressed
ENSG00000232864.1	processed_pseudogene	non-expressed
ENSG00000281190.1	miRNA	non-expressed
ENSG00000125967.15	protein_coding	expressed
ENSG00000277497.1	miRNA	non-expressed
ENSG00000267295.1	unprocessed_pseudogene	non-expressed
ENSG00000232187.1	processed_pseudogene	expressed
ENSG00000278908.1	TEC	non-expressed
ENSG00000280132.1	TEC	expressed
ENSG00000258104.1	processed_pseudogene	non-expressed
ENSG00000206739.1	misc_RNA	expressed
ENSG00000229999.5	antisense	expressed
ENSG00000171574.16	protein_coding	expressed
ENSG00000278008.1	processed_pseudogene	non-expressed
ENSG00000176281.4	protein_coding	non-expressed
ENSG00000225401.2	transcribed_processed_pseudogene	non-expressed
ENSG00000188859.6	protein_coding	expressed
ENSG00000109255.10	protein_coding	expressed
ENSG00000104946.9	protein_coding	expressed
ENSG00000277302.1	miRNA	non-expressed
ENSG00000233581.1	antisense	non-expressed
ENSG00000143603.17	protein_coding	expressed
ENSG00000163421.7	protein_coding	expressed
ENSG00000232979.1	processed_pseudogene	non-expressed
ENSG00000254792.1	processed_pseudogene	non-expressed
ENSG00000184209.14	protein_coding	expressed
ENSG00000136541.13	protein_coding	expressed
ENSG00000184281.13	protein_coding	expressed
ENSG00000199172.2	miRNA	expressed
ENSG00000281641.1	lincRNA	expressed
ENSG00000274023.1	sense_overlapping	non-expressed
ENSG00000249655.1	antisense	expressed
ENSG00000280318.1	TEC	non-expressed
ENSG00000253692.3	IG_C_pseudogene	expressed
ENSG00000142677.3	protein_coding	expressed
ENSG00000275174.1	snRNA	non-expressed
ENSG00000251725.1	miRNA	non-expressed
ENSG00000146223.13	protein_coding	expressed
ENSG00000248971.2	processed_pseudogene	expressed
ENSG00000260042.1	lincRNA	non-expressed
ENSG00000249927.1	processed_pseudogene	non-expressed
ENSG00000251275.1	unprocessed_pseudogene	non-expressed
ENSG00000244024.1	processed_pseudogene	non-expressed
ENSG00000236595.1	processed_pseudogene	non-expressed
ENSG00000279616.1	TEC	non-expressed
ENSG00000239718.1	antisense	non-expressed
ENSG00000251741.1	snRNA	non-expressed
ENSG00000100276.9	protein_coding	expressed
ENSG00000124782.18	protein_coding	expressed
ENSG00000151962.6	protein_coding	expressed
ENSG00000197866.3	unprocessed_pseudogene	non-expressed
ENSG00000168802.11	protein_coding	expressed
ENSG00000237235.2	TR_D_gene	non-expressed
ENSG00000007384.14	protein_coding	expressed
ENSG00000230123.1	unprocessed_pseudogene	non-expressed
ENSG00000232912.4	antisense	expressed
ENSG00000243772.5	protein_coding	expressed
ENSG00000115239.20	protein_coding	expressed
ENSG00000227212.3	processed_pseudogene	expressed
ENSG00000180626.9	protein_coding	expressed
ENSG00000248493.1	processed_pseudogene	non-expressed
ENSG00000240478.1	lincRNA	non-expressed
ENSG00000251078.1	processed_pseudogene	non-expressed
ENSG00000257890.1	lincRNA	expressed
ENSG00000258924.4	processed_transcript	non-expressed
ENSG00000207874.1	miRNA	non-expressed
ENSG00000151882.10	protein_coding	expressed
ENSG00000278479.1	miRNA	non-expressed
ENSG00000207180.1	snRNA	non-expressed
ENSG00000172179.10	protein_coding	expressed
ENSG00000256774.1	processed_pseudogene	non-expressed
ENSG00000143196.4	protein_coding	expressed
ENSG00000250043.1	lincRNA	non-expressed
ENSG00000207816.1	miRNA	non-expressed
ENSG00000267436.1	antisense	non-expressed
ENSG00000250166.2	lincRNA	non-expressed
ENSG00000267203.1	processed_pseudogene	expressed
ENSG00000281600.1	miRNA	non-expressed
ENSG00000267122.1	antisense	expressed
ENSG00000275994.1	snoRNA	non-expressed
ENSG00000198729.4	protein_coding	expressed
ENSG00000248690.5	antisense	expressed
ENSG00000279182.1	antisense	expressed
ENSG00000163273.3	protein_coding	expressed
ENSG00000200213.1	snRNA	non-expressed
ENSG00000232350.1	unprocessed_pseudogene	non-expressed
ENSG00000221469.1	miRNA	non-expressed
ENSG00000213822.6	protein_coding	non-expressed
ENSG00000279107.1	TEC	non-expressed
ENSG00000273180.1	lincRNA	non-expressed
ENSG00000272023.1	lincRNA	non-expressed
ENSG00000253685.1	unprocessed_pseudogene	non-expressed
ENSG00000199260.1	snRNA	non-expressed
ENSG00000180720.7	protein_coding	expressed
ENSG00000248191.1	processed_pseudogene	expressed
ENSG00000240373.1	antisense	expressed
ENSG00000180525.11	protein_coding	expressed
ENSG00000217159.2	processed_pseudogene	expressed
ENSG00000223275.1	miRNA	non-expressed
ENSG00000221633.2	snoRNA	non-expressed
ENSG00000281389.1	miRNA	non-expressed
ENSG00000249539.1	processed_pseudogene	non-expressed
ENSG00000131100.11	protein_coding	expressed
ENSG00000255171.4	lincRNA	non-expressed
ENSG00000066557.5	protein_coding	expressed
ENSG00000157064.9	protein_coding	expressed
ENSG00000225328.1	antisense	non-expressed
ENSG00000279377.1	TEC	expressed
ENSG00000258369.1	processed_pseudogene	non-expressed
ENSG00000147687.15	protein_coding	expressed
ENSG00000242924.1	lincRNA	non-expressed
ENSG00000206977.1	snoRNA	non-expressed
ENSG00000260563.3	lincRNA	expressed
ENSG00000263628.1	miRNA	non-expressed
ENSG00000186815.11	protein_coding	expressed
ENSG00000134240.10	protein_coding	expressed
ENSG00000269692.1	processed_pseudogene	non-expressed
ENSG00000226337.3	lincRNA	non-expressed
ENSG00000271088.1	processed_pseudogene	non-expressed
ENSG00000166266.12	protein_coding	expressed
ENSG00000225381.2	processed_pseudogene	non-expressed
ENSG00000159377.9	protein_coding	expressed
ENSG00000249312.1	processed_pseudogene	non-expressed
ENSG00000188372.13	protein_coding	expressed
ENSG00000230578.3	transcribed_unprocessed_pseudogene	non-expressed
ENSG00000227244.2	lincRNA	non-expressed
ENSG00000274363.1	lincRNA	expressed
ENSG00000234929.1	lincRNA	non-expressed
ENSG00000250594.2	processed_pseudogene	non-expressed
ENSG00000070729.12	protein_coding	expressed
ENSG00000115295.18	protein_coding	expressed
ENSG00000243352.3	misc_RNA	expressed
ENSG00000235264.1	processed_pseudogene	non-expressed
ENSG00000254342.1	processed_pseudogene	non-expressed
ENSG00000198920.8	protein_coding	expressed
ENSG00000202150.1	snRNA	expressed
ENSG00000244342.4	lincRNA	non-expressed
ENSG00000259149.1	lincRNA	non-expressed
ENSG00000212259.1	snRNA	non-expressed
ENSG00000215548.2	unprocessed_pseudogene	expressed
ENSG00000065328.15	protein_coding	expressed
ENSG00000222004.6	lincRNA	expressed
ENSG00000161091.11	protein_coding	expressed
ENSG00000263537.2	misc_RNA	non-expressed
ENSG00000238190.1	processed_pseudogene	expressed
ENSG00000223377.1	unprocessed_pseudogene	non-expressed
ENSG00000105248.14	protein_coding	expressed
ENSG00000146918.18	protein_coding	expressed
ENSG00000270826.1	processed_pseudogene	non-expressed
ENSG00000188801.9	processed_pseudogene	non-expressed
ENSG00000272109.1	antisense	expressed
ENSG00000242266.3	misc_RNA	non-expressed
ENSG00000248672.4	protein_coding	expressed
ENSG00000264007.1	sense_intronic	expressed
ENSG00000262500.1	processed_pseudogene	expressed
ENSG00000112394.15	protein_coding	expressed
ENSG00000279373.1	TEC	expressed
ENSG00000274150.1	unprocessed_pseudogene	expressed
ENSG00000255734.1	processed_pseudogene	non-expressed
ENSG00000260316.2	sense_intronic	expressed
ENSG00000186868.14	protein_coding	expressed
ENSG00000201713.1	rRNA	non-expressed
ENSG00000231046.1	antisense	non-expressed
ENSG00000280010.1	TEC	expressed
ENSG00000130312.5	protein_coding	expressed
ENSG00000223547.8	protein_coding	expressed
ENSG00000200377.1	snoRNA	non-expressed
ENSG00000258954.1	lincRNA	non-expressed
ENSG00000176438.11	protein_coding	expressed
ENSG00000174473.14	protein_coding	expressed
ENSG00000125818.16	protein_coding	expressed
ENSG00000223198.1	snRNA	expressed
ENSG00000104814.11	protein_coding	expressed
ENSG00000170590.7	lincRNA	non-expressed
ENSG00000108479.10	protein_coding	expressed
ENSG00000104870.11	protein_coding	expressed
ENSG00000181016.8	protein_coding	expressed
ENSG00000141034.8	protein_coding	expressed
ENSG00000277288.2	protein_coding	expressed
ENSG00000223403.3	lincRNA	expressed
ENSG00000253266.1	lincRNA	expressed
ENSG00000256092.2	lincRNA	expressed
ENSG00000212100.2	miRNA	non-expressed
ENSG00000239408.1	processed_pseudogene	non-expressed
ENSG00000268605.1	sense_intronic	non-expressed
ENSG00000268970.1	sense_intronic	expressed
ENSG00000245958.5	transcribed_unprocessed_pseudogene	expressed
ENSG00000212133.1	snRNA	non-expressed
ENSG00000232120.1	antisense	non-expressed
ENSG00000066739.10	protein_coding	expressed
ENSG00000244259.1	processed_pseudogene	non-expressed
ENSG00000236267.1	antisense	non-expressed
ENSG00000232537.1	lincRNA	non-expressed
ENSG00000181541.5	protein_coding	expressed
ENSG00000278531.1	unprocessed_pseudogene	expressed
ENSG00000264906.1	miRNA	non-expressed
ENSG00000213523.8	protein_coding	expressed
ENSG00000260662.2	processed_pseudogene	non-expressed
ENSG00000221471.1	miRNA	non-expressed
ENSG00000279410.1	TEC	non-expressed
ENSG00000200702.1	misc_RNA	non-expressed
ENSG00000245750.6	lincRNA	expressed
ENSG00000224351.2	processed_pseudogene	non-expressed
ENSG00000124493.12	protein_coding	expressed
ENSG00000249209.2	protein_coding	non-expressed
ENSG00000243063.1	IG_V_gene	expressed
ENSG00000231166.2	processed_pseudogene	non-expressed
ENSG00000249231.6	lincRNA	expressed
ENSG00000206712.1	snRNA	expressed
ENSG00000224813.2	transcribed_unprocessed_pseudogene	non-expressed
ENSG00000130707.16	protein_coding	expressed
ENSG00000261522.4	transcribed_unprocessed_pseudogene	non-expressed
ENSG00000227098.1	lincRNA	non-expressed
ENSG00000254987.1	lincRNA	non-expressed
ENSG00000210176.1	Mt_tRNA	non-expressed
ENSG00000259915.2	lincRNA	expressed
ENSG00000253540.4	transcribed_unprocessed_pseudogene	expressed
ENSG00000148908.13	protein_coding	expressed
ENSG00000271290.1	processed_pseudogene	non-expressed
ENSG00000276168.1	misc_RNA	non-expressed
ENSG00000259036.1	antisense	non-expressed
ENSG00000221421.1	miRNA	non-expressed
ENSG00000162692.9	protein_coding	expressed
ENSG00000170379.18	protein_coding	expressed
ENSG00000254175.1	IG_V_pseudogene	non-expressed
ENSG00000215802.3	transcribed_processed_pseudogene	non-expressed
ENSG00000244703.3	unprocessed_pseudogene	non-expressed
ENSG00000274385.1	snRNA	non-expressed
ENSG00000112715.19	protein_coding	expressed
ENSG00000096996.14	protein_coding	expressed
ENSG00000021355.11	protein_coding	expressed
ENSG00000230099.2	TR_V_gene	expressed
ENSG00000249406.1	lincRNA	expressed
ENSG00000141098.11	protein_coding	expressed
ENSG00000199620.1	rRNA	non-expressed
ENSG00000272282.1	lincRNA	expressed
ENSG00000182511.10	protein_coding	expressed
ENSG00000258892.1	processed_transcript	non-expressed
ENSG00000250896.1	processed_pseudogene	expressed
ENSG00000237705.1	antisense	non-expressed
ENSG00000216020.2	miRNA	non-expressed
ENSG00000268651.2	protein_coding	non-expressed
ENSG00000250492.1	processed_pseudogene	expressed
ENSG00000227971.1	processed_pseudogene	non-expressed
ENSG00000162374.15	protein_coding	expressed
ENSG00000147081.13	protein_coding	non-expressed
ENSG00000267253.1	processed_pseudogene	expressed
ENSG00000264251.2	misc_RNA	non-expressed
ENSG00000201178.1	misc_RNA	non-expressed
ENSG00000280861.1	miRNA	non-expressed
ENSG00000280021.1	polymorphic_pseudogene	non-expressed
ENSG00000139970.15	protein_coding	expressed
ENSG00000105427.8	protein_coding	expressed
ENSG00000204653.8	protein_coding	expressed
ENSG00000244642.3	misc_RNA	expressed
ENSG00000204983.11	protein_coding	expressed
ENSG00000255054.3	protein_coding	non-expressed
ENSG00000222276.1	snRNA	non-expressed
ENSG00000151364.14	protein_coding	expressed
ENSG00000206887.1	snRNA	non-expressed
ENSG00000260152.2	processed_pseudogene	non-expressed
ENSG00000143363.14	protein_coding	expressed
ENSG00000118046.13	protein_coding	expressed
ENSG00000240405.4	lincRNA	expressed
ENSG00000257899.1	processed_pseudogene	non-expressed
ENSG00000204949.7	antisense	expressed
ENSG00000277460.1	misc_RNA	non-expressed
ENSG00000254794.1	processed_pseudogene	non-expressed
ENSG00000154856.11	protein_coding	expressed
ENSG00000186174.11	protein_coding	expressed
ENSG00000199698.1	misc_RNA	non-expressed
ENSG00000258028.1	lincRNA	expressed
ENSG00000171234.12	protein_coding	expressed
ENSG00000166949.14	protein_coding	expressed
ENSG00000255361.1	processed_pseudogene	non-expressed
ENSG00000085274.14	protein_coding	expressed
ENSG00000259598.1	antisense	non-expressed
ENSG00000227304.3	transcribed_processed_pseudogene	expressed
ENSG00000223265.1	snRNA	non-expressed
ENSG00000199593.1	snoRNA	non-expressed
ENSG00000266595.1	miRNA	non-expressed
ENSG00000115568.14	protein_coding	expressed
ENSG00000261778.1	processed_pseudogene	non-expressed
ENSG00000147421.16	protein_coding	expressed
ENSG00000250983.1	processed_pseudogene	non-expressed
ENSG00000264679.1	miRNA	non-expressed
ENSG00000146618.3	protein_coding	non-expressed
ENSG00000254812.1	antisense	expressed
ENSG00000205593.10	protein_coding	expressed
ENSG00000184110.13	protein_coding	expressed
ENSG00000271848.1	antisense	expressed
ENSG00000280687.1	miRNA	non-expressed
ENSG00000236896.1	antisense	expressed
ENSG00000137872.14	protein_coding	expressed
ENSG00000278215.1	processed_pseudogene	non-expressed
ENSG00000270961.1	IG_D_gene	non-expressed
ENSG00000145354.8	protein_coding	expressed
ENSG00000265736.1	miRNA	non-expressed
ENSG00000126337.12	protein_coding	expressed
ENSG00000153266.11	protein_coding	non-expressed
ENSG00000272478.1	antisense	non-expressed
ENSG00000242317.1	lincRNA	expressed
ENSG00000276007.1	sense_intronic	expressed
ENSG00000158526.7	protein_coding	expressed
ENSG00000253844.1	lincRNA	expressed
ENSG00000279099.1	TEC	non-expressed
ENSG00000275265.1	lincRNA	non-expressed
ENSG00000252342.1	rRNA	non-expressed
ENSG00000265777.2	misc_RNA	non-expressed
ENSG00000262899.1	antisense	non-expressed
ENSG00000105997.21	protein_coding	expressed
ENSG00000185837.3	antisense	expressed
ENSG00000137522.16	protein_coding	expressed
ENSG00000234838.3	processed_pseudogene	expressed
ENSG00000227217.1	antisense	non-expressed
ENSG00000221551.1	miRNA	non-expressed
ENSG00000253935.1	IG_V_pseudogene	non-expressed
ENSG00000251889.1	snRNA	non-expressed
ENSG00000257831.1	antisense	expressed
ENSG00000139209.14	protein_coding	expressed
ENSG00000248870.1	lincRNA	expressed
ENSG00000261760.5	lincRNA	expressed
ENSG00000152952.10	protein_coding	expressed
ENSG00000270456.1	processed_pseudogene	non-expressed
ENSG00000076344.14	protein_coding	expressed
ENSG00000206585.1	snRNA	expressed
ENSG00000272092.1	lincRNA	expressed
ENSG00000133863.5	protein_coding	expressed
ENSG00000137941.15	protein_coding	expressed
ENSG00000165553.4	protein_coding	expressed
ENSG00000276092.1	sense_intronic	non-expressed
ENSG00000146232.13	protein_coding	expressed
ENSG00000233236.1	lincRNA	non-expressed
ENSG00000165588.15	protein_coding	expressed
ENSG00000087053.17	protein_coding	expressed
ENSG00000250946.2	unprocessed_pseudogene	non-expressed
ENSG00000236709.1	sense_intronic	expressed
ENSG00000168894.8	protein_coding	expressed
ENSG00000267106.4	processed_transcript	expressed
ENSG00000251087.3	unprocessed_pseudogene	expressed
ENSG00000165029.14	protein_coding	expressed
ENSG00000248929.1	processed_pseudogene	non-expressed
ENSG00000243704.3	misc_RNA	non-expressed
ENSG00000198284.8	transcribed_processed_pseudogene	non-expressed
ENSG00000250735.4	lincRNA	expressed
ENSG00000268922.1	processed_pseudogene	non-expressed
ENSG00000274010.1	processed_pseudogene	non-expressed
ENSG00000277880.1	TR_V_gene	non-expressed
ENSG00000265357.1	miRNA	non-expressed
ENSG00000255139.1	antisense	expressed
ENSG00000235503.2	antisense	non-expressed
ENSG00000158258.14	protein_coding	expressed
ENSG00000165997.4	protein_coding	expressed
ENSG00000258553.4	antisense	non-expressed
ENSG00000239354.1	processed_pseudogene	non-expressed
ENSG00000213140.3	processed_pseudogene	non-expressed
ENSG00000241269.1	antisense	expressed
ENSG00000203620.2	lincRNA	non-expressed
ENSG00000229951.4	antisense	expressed
ENSG00000185418.14	protein_coding	expressed
ENSG00000157992.11	protein_coding	expressed
ENSG00000200525.1	snRNA	non-expressed
ENSG00000007350.15	protein_coding	expressed
ENSG00000234015.1	lincRNA	non-expressed
ENSG00000251306.1	processed_pseudogene	non-expressed
ENSG00000279012.1	polymorphic_pseudogene	non-expressed
ENSG00000255394.4	lincRNA	expressed
ENSG00000266176.1	lincRNA	expressed
ENSG00000217377.1	processed_pseudogene	non-expressed
ENSG00000227139.1	lincRNA	non-expressed
ENSG00000225582.1	lincRNA	non-expressed
ENSG00000137166.13	protein_coding	expressed
ENSG00000228004.1	processed_pseudogene	non-expressed
ENSG00000251369.7	protein_coding	expressed
ENSG00000261320.1	lincRNA	expressed
ENSG00000143353.10	protein_coding	expressed
ENSG00000265681.5	protein_coding	expressed
ENSG00000254002.1	lincRNA	non-expressed
ENSG00000117362.11	protein_coding	expressed
ENSG00000202270.1	snoRNA	non-expressed
ENSG00000263381.1	miRNA	non-expressed
ENSG00000263594.1	lincRNA	non-expressed
ENSG00000130158.12	protein_coding	expressed
ENSG00000275124.1	miRNA	non-expressed
ENSG00000276029.1	miRNA	non-expressed
ENSG00000211691.2	TR_J_gene	non-expressed
ENSG00000252943.1	snRNA	non-expressed
ENSG00000214883.4	unprocessed_pseudogene	non-expressed
ENSG00000252768.1	snRNA	expressed
ENSG00000201554.1	misc_RNA	non-expressed
ENSG00000130561.15	protein_coding	expressed
ENSG00000249558.1	processed_pseudogene	non-expressed
ENSG00000267205.1	antisense	non-expressed
ENSG00000255349.1	unprocessed_pseudogene	non-expressed
ENSG00000108342.11	protein_coding	expressed
ENSG00000214207.2	processed_pseudogene	expressed
ENSG00000102977.12	protein_coding	expressed
ENSG00000223500.1	processed_pseudogene	non-expressed
ENSG00000100197.19	protein_coding	expressed
ENSG00000204662.2	unprocessed_pseudogene	non-expressed
ENSG00000265137.2	miRNA	non-expressed
ENSG00000132437.16	protein_coding	expressed
ENSG00000226486.1	lincRNA	non-expressed
ENSG00000126214.19	protein_coding	expressed
ENSG00000206503.10	protein_coding	expressed
ENSG00000163606.9	protein_coding	expressed
ENSG00000249156.1	processed_pseudogene	non-expressed
ENSG00000239827.7	transcribed_unprocessed_pseudogene	expressed
ENSG00000232197.1	antisense	non-expressed
ENSG00000249639.1	antisense	expressed
ENSG00000239168.1	snRNA	non-expressed
ENSG00000005059.14	protein_coding	expressed
ENSG00000180116.14	protein_coding	non-expressed
ENSG00000238393.1	miRNA	non-expressed
ENSG00000264647.1	antisense	expressed
ENSG00000226801.2	processed_pseudogene	non-expressed
ENSG00000199038.1	miRNA	expressed
ENSG00000230289.1	antisense	expressed
ENSG00000147383.9	protein_coding	expressed
ENSG00000229247.2	processed_pseudogene	non-expressed
ENSG00000218536.1	processed_pseudogene	non-expressed
ENSG00000206896.1	snRNA	non-expressed
ENSG00000264484.2	misc_RNA	non-expressed
ENSG00000133475.15	protein_coding	expressed
ENSG00000168374.9	protein_coding	expressed
ENSG00000067225.16	protein_coding	expressed
ENSG00000224812.2	antisense	expressed
ENSG00000239185.1	snRNA	non-expressed
ENSG00000171792.9	protein_coding	expressed
ENSG00000252412.1	misc_RNA	expressed
ENSG00000272510.1	antisense	expressed
ENSG00000197363.8	protein_coding	expressed
ENSG00000221525.1	miRNA	non-expressed
ENSG00000268282.1	processed_pseudogene	expressed
ENSG00000247556.5	processed_transcript	expressed
ENSG00000252362.1	snRNA	non-expressed
ENSG00000235518.2	lincRNA	non-expressed
ENSG00000224516.4	antisense	non-expressed
ENSG00000223554.1	lincRNA	non-expressed
ENSG00000234969.1	processed_pseudogene	expressed
ENSG00000234730.1	lincRNA	non-expressed
ENSG00000231113.2	antisense	expressed
ENSG00000223544.1	unprocessed_pseudogene	non-expressed
ENSG00000083454.20	protein_coding	expressed
ENSG00000254172.1	snRNA	non-expressed
ENSG00000277590.1	miRNA	non-expressed
ENSG00000266160.2	misc_RNA	non-expressed
ENSG00000233928.4	lincRNA	expressed
ENSG00000201586.1	snRNA	non-expressed
ENSG00000155918.6	protein_coding	expressed
ENSG00000106341.9	protein_coding	non-expressed
ENSG00000250506.5	protein_coding	expressed
ENSG00000258204.1	processed_pseudogene	non-expressed
ENSG00000182963.8	protein_coding	expressed
ENSG00000244456.2	transcribed_unprocessed_pseudogene	non-expressed
ENSG00000274985.1	unprocessed_pseudogene	non-expressed
ENSG00000242320.2	processed_pseudogene	non-expressed
ENSG00000278612.1	miRNA	non-expressed
ENSG00000223488.2	processed_pseudogene	non-expressed
ENSG00000253576.1	antisense	non-expressed
ENSG00000202410.1	misc_RNA	non-expressed
ENSG00000272568.4	antisense	expressed
ENSG00000251371.1	lincRNA	non-expressed
ENSG00000228100.1	lincRNA	expressed
ENSG00000235199.1	processed_pseudogene	non-expressed
ENSG00000255163.1	processed_pseudogene	non-expressed
ENSG00000234172.1	lincRNA	non-expressed
ENSG00000238145.2	processed_pseudogene	expressed
ENSG00000270531.1	processed_pseudogene	non-expressed
ENSG00000254529.1	unprocessed_pseudogene	non-expressed
ENSG00000070669.15	protein_coding	expressed
ENSG00000254174.1	IG_V_pseudogene	expressed
ENSG00000261066.1	lincRNA	non-expressed
ENSG00000253663.1	processed_pseudogene	non-expressed
ENSG00000255257.1	lincRNA	expressed
ENSG00000225003.1	unprocessed_pseudogene	non-expressed
ENSG00000243725.5	protein_coding	expressed
ENSG00000213152.5	processed_pseudogene	expressed
ENSG00000231353.1	unprocessed_pseudogene	non-expressed
ENSG00000229159.1	unprocessed_pseudogene	non-expressed
ENSG00000280581.1	misc_RNA	non-expressed
ENSG00000259255.1	lincRNA	non-expressed
ENSG00000234634.1	lincRNA	non-expressed
ENSG00000226093.1	processed_pseudogene	non-expressed
ENSG00000104731.12	protein_coding	expressed
ENSG00000137574.9	protein_coding	expressed
ENSG00000266952.1	lincRNA	non-expressed
ENSG00000144843.10	protein_coding	expressed
ENSG00000226970.2	processed_pseudogene	expressed
ENSG00000215127.6	transcribed_processed_pseudogene	non-expressed
ENSG00000254781.1	processed_pseudogene	non-expressed
ENSG00000185722.15	protein_coding	expressed
ENSG00000265865.1	miRNA	non-expressed
ENSG00000279283.1	TEC	expressed
ENSG00000005001.8	protein_coding	expressed
ENSG00000235352.1	processed_pseudogene	non-expressed
ENSG00000230498.1	antisense	expressed
ENSG00000254469.6	protein_coding	expressed
ENSG00000080709.13	protein_coding	expressed
ENSG00000009694.12	protein_coding	expressed
ENSG00000083457.10	protein_coding	expressed
ENSG00000260528.3	lincRNA	expressed
ENSG00000234861.2	processed_pseudogene	non-expressed
ENSG00000174145.7	protein_coding	expressed
ENSG00000131467.9	protein_coding	expressed
ENSG00000224686.1	processed_pseudogene	non-expressed
ENSG00000256783.1	lincRNA	non-expressed
ENSG00000273653.1	miRNA	non-expressed
ENSG00000280007.1	antisense	expressed
ENSG00000173465.6	protein_coding	expressed
ENSG00000260758.1	lincRNA	non-expressed
ENSG00000164188.7	protein_coding	expressed
ENSG00000102524.10	protein_coding	expressed
ENSG00000227203.3	processed_pseudogene	expressed
ENSG00000225213.2	sense_intronic	expressed
ENSG00000281639.1	miRNA	non-expressed
ENSG00000237171.1	unprocessed_pseudogene	non-expressed
ENSG00000250130.1	processed_pseudogene	expressed
ENSG00000112159.10	protein_coding	expressed
ENSG00000270937.1	lincRNA	expressed
ENSG00000221852.4	protein_coding	expressed
ENSG00000256238.1	processed_pseudogene	expressed
ENSG00000252157.1	snRNA	non-expressed
ENSG00000262031.1	lincRNA	non-expressed
ENSG00000254842.5	lincRNA	expressed
ENSG00000281420.1	pseudogene	expressed
ENSG00000225822.4	antisense	expressed
ENSG00000260187.1	transcribed_processed_pseudogene	non-expressed
ENSG00000015475.17	protein_coding	expressed
ENSG00000157870.13	protein_coding	expressed
ENSG00000184785.5	protein_coding	expressed
ENSG00000096968.11	protein_coding	expressed
ENSG00000253331.1	lincRNA	non-expressed
ENSG00000262248.1	processed_pseudogene	expressed
ENSG00000197462.3	lincRNA	non-expressed
ENSG00000100749.6	protein_coding	expressed
ENSG00000154229.10	protein_coding	expressed
ENSG00000200783.1	misc_RNA	non-expressed
ENSG00000166478.8	protein_coding	expressed
ENSG00000278878.1	lincRNA	non-expressed
ENSG00000258290.1	processed_pseudogene	expressed
ENSG00000180340.6	protein_coding	expressed
ENSG00000274933.3	protein_coding	non-expressed
ENSG00000257231.1	processed_pseudogene	expressed
ENSG00000263749.1	processed_pseudogene	non-expressed
ENSG00000109270.11	protein_coding	expressed
ENSG00000268050.2	antisense	non-expressed
ENSG00000236471.1	lincRNA	expressed
ENSG00000196468.7	protein_coding	expressed
ENSG00000198643.5	protein_coding	expressed
ENSG00000233593.5	lincRNA	expressed
ENSG00000232429.3	processed_pseudogene	expressed
ENSG00000221662.1	miRNA	non-expressed
ENSG00000148843.12	protein_coding	expressed
ENSG00000237190.3	protein_coding	expressed
ENSG00000254734.1	lincRNA	non-expressed
ENSG00000198168.7	protein_coding	expressed
ENSG00000116161.16	protein_coding	expressed
ENSG00000116748.18	protein_coding	expressed
ENSG00000249601.2	lincRNA	non-expressed
ENSG00000242829.1	processed_pseudogene	non-expressed
ENSG00000280135.1	TEC	expressed
ENSG00000277613.1	snRNA	non-expressed
ENSG00000265484.1	lincRNA	non-expressed
ENSG00000242522.1	antisense	expressed
ENSG00000249026.2	processed_pseudogene	expressed
ENSG00000269186.1	lincRNA	expressed
ENSG00000241550.3	misc_RNA	non-expressed
ENSG00000212383.1	snoRNA	non-expressed
ENSG00000277067.3	lincRNA	non-expressed
ENSG00000259645.1	sense_intronic	expressed
ENSG00000183309.10	protein_coding	expressed
ENSG00000253889.1	IG_V_pseudogene	non-expressed
ENSG00000106245.8	protein_coding	expressed
ENSG00000200170.1	misc_RNA	expressed
ENSG00000175279.20	protein_coding	expressed
ENSG00000216938.3	processed_pseudogene	non-expressed
ENSG00000236468.1	processed_pseudogene	expressed
ENSG00000110107.7	protein_coding	expressed
ENSG00000165591.6	protein_coding	expressed
ENSG00000224765.1	antisense	non-expressed
ENSG00000275413.1	antisense	expressed
ENSG00000259696.2	processed_pseudogene	non-expressed
ENSG00000253808.1	IG_V_pseudogene	non-expressed
ENSG00000168067.10	protein_coding	expressed
ENSG00000167100.13	protein_coding	expressed
ENSG00000251602.5	antisense	expressed
ENSG00000236978.1	processed_pseudogene	non-expressed
ENSG00000145824.11	protein_coding	expressed
ENSG00000102195.8	protein_coding	expressed
ENSG00000228084.1	antisense	expressed
ENSG00000276093.1	lincRNA	expressed
ENSG00000248559.1	antisense	expressed
ENSG00000124181.13	protein_coding	expressed
ENSG00000196274.5	misc_RNA	expressed
ENSG00000029364.10	protein_coding	expressed
ENSG00000254931.2	processed_pseudogene	non-expressed
ENSG00000230239.1	lincRNA	non-expressed
ENSG00000213070.3	processed_pseudogene	expressed
ENSG00000263220.1	antisense	expressed
ENSG00000121388.5	unprocessed_pseudogene	expressed
ENSG00000169062.13	protein_coding	expressed
ENSG00000273450.1	antisense	expressed
ENSG00000207933.2	miRNA	non-expressed
ENSG00000274343.1	processed_pseudogene	non-expressed
ENSG00000233259.4	processed_pseudogene	non-expressed
ENSG00000120253.12	protein_coding	expressed
ENSG00000235089.1	processed_pseudogene	non-expressed
ENSG00000251517.1	lincRNA	expressed
ENSG00000099889.12	protein_coding	expressed
ENSG00000140090.16	protein_coding	expressed
ENSG00000241622.1	processed_pseudogene	expressed
ENSG00000150526.10	protein_coding	expressed
ENSG00000278764.1	misc_RNA	non-expressed
ENSG00000106628.9	protein_coding	expressed
ENSG00000259708.1	antisense	non-expressed
ENSG00000272368.2	antisense	expressed
ENSG00000103534.15	protein_coding	expressed
ENSG00000198042.9	protein_coding	expressed
ENSG00000259602.1	antisense	non-expressed
ENSG00000228430.7	lincRNA	non-expressed
ENSG00000239911.2	antisense	expressed
ENSG00000139289.12	protein_coding	expressed
ENSG00000197171.5	unprocessed_pseudogene	non-expressed
ENSG00000231219.1	unprocessed_pseudogene	non-expressed
ENSG00000238088.1	unprocessed_pseudogene	non-expressed
ENSG00000250722.4	protein_coding	expressed
ENSG00000226833.4	antisense	expressed
ENSG00000257042.1	antisense	expressed
ENSG00000239555.3	misc_RNA	non-expressed
ENSG00000072832.13	protein_coding	expressed
ENSG00000197050.9	protein_coding	expressed
ENSG00000267659.4	lincRNA	expressed
ENSG00000263809.1	protein_coding	expressed
ENSG00000279671.1	TEC	non-expressed
ENSG00000280396.1	TEC	non-expressed
ENSG00000177352.9	protein_coding	expressed
ENSG00000273096.1	sense_intronic	expressed
ENSG00000102007.9	protein_coding	expressed
ENSG00000269321.1	antisense	non-expressed
ENSG00000226643.2	lincRNA	non-expressed
ENSG00000231987.1	lincRNA	non-expressed
ENSG00000152784.14	protein_coding	expressed
ENSG00000228700.1	processed_pseudogene	non-expressed
ENSG00000254705.1	antisense	non-expressed
ENSG00000262470.2	transcribed_processed_pseudogene	non-expressed
ENSG00000265975.1	lincRNA	expressed
ENSG00000249722.1	lincRNA	non-expressed
ENSG00000230162.1	unprocessed_pseudogene	expressed
ENSG00000176160.8	protein_coding	expressed
ENSG00000223402.1	processed_pseudogene	non-expressed
ENSG00000271532.1	processed_pseudogene	expressed
ENSG00000169139.10	protein_coding	expressed
ENSG00000273170.4	protein_coding	expressed
ENSG00000199158.1	miRNA	non-expressed
ENSG00000232442.1	antisense	expressed
ENSG00000231873.1	lincRNA	expressed
ENSG00000164898.11	protein_coding	expressed
ENSG00000161800.11	protein_coding	expressed
ENSG00000253717.1	lincRNA	non-expressed
ENSG00000200139.1	snRNA	non-expressed
ENSG00000163945.14	protein_coding	expressed
ENSG00000259482.1	antisense	non-expressed
ENSG00000251218.1	lincRNA	non-expressed
ENSG00000159496.13	protein_coding	expressed
ENSG00000233308.1	antisense	expressed
ENSG00000270379.4	protein_coding	expressed
ENSG00000155052.14	protein_coding	expressed
ENSG00000171757.14	protein_coding	expressed
ENSG00000222631.3	miRNA	non-expressed
ENSG00000260185.1	antisense	non-expressed
ENSG00000262601.1	lincRNA	expressed
ENSG00000243832.1	lincRNA	non-expressed
ENSG00000273699.1	miRNA	non-expressed
ENSG00000256947.1	antisense	non-expressed
ENSG00000270890.1	processed_pseudogene	expressed
ENSG00000276527.1	lincRNA	expressed
ENSG00000225761.1	sense_intronic	expressed
ENSG00000102595.17	protein_coding	expressed
ENSG00000259037.1	antisense	non-expressed
ENSG00000134207.13	protein_coding	expressed
ENSG00000230376.1	processed_pseudogene	non-expressed
ENSG00000170214.3	protein_coding	expressed
ENSG00000227361.1	processed_pseudogene	expressed
ENSG00000198723.9	protein_coding	expressed
ENSG00000100316.14	protein_coding	expressed
ENSG00000236184.1	processed_pseudogene	expressed
ENSG00000261191.1	antisense	non-expressed
ENSG00000080007.7	protein_coding	expressed
ENSG00000274934.1	misc_RNA	non-expressed
ENSG00000120868.12	protein_coding	expressed
ENSG00000233817.1	lincRNA	expressed
ENSG00000275656.1	misc_RNA	non-expressed
ENSG00000252133.1	snoRNA	non-expressed
ENSG00000230734.1	processed_pseudogene	expressed
ENSG00000262158.1	unprocessed_pseudogene	non-expressed
ENSG00000234740.1	sense_intronic	expressed
ENSG00000196850.5	protein_coding	expressed
ENSG00000166848.5	protein_coding	expressed
ENSG00000224520.2	processed_pseudogene	expressed
ENSG00000201778.1	misc_RNA	non-expressed
ENSG00000266006.1	miRNA	non-expressed
ENSG00000258781.2	unprocessed_pseudogene	non-expressed
ENSG00000240032.1	antisense	expressed
ENSG00000237609.1	lincRNA	expressed
ENSG00000272944.1	antisense	expressed
ENSG00000174485.13	protein_coding	expressed
ENSG00000176232.10	unprocessed_pseudogene	non-expressed
ENSG00000226193.1	antisense	non-expressed
ENSG00000268296.1	lincRNA	non-expressed
ENSG00000272788.1	sense_intronic	expressed
ENSG00000228958.1	processed_pseudogene	non-expressed
ENSG00000239620.1	processed_pseudogene	expressed
ENSG00000274631.1	processed_pseudogene	non-expressed
ENSG00000232855.5	lincRNA	expressed
ENSG00000249437.6	protein_coding	expressed
ENSG00000152213.3	protein_coding	expressed
ENSG00000253055.1	rRNA	non-expressed
ENSG00000232545.1	sense_intronic	expressed
ENSG00000266288.1	lincRNA	non-expressed
ENSG00000198825.10	protein_coding	expressed
ENSG00000279123.1	TEC	expressed
ENSG00000277662.1	sense_intronic	expressed
ENSG00000223866.1	processed_pseudogene	non-expressed
ENSG00000225572.1	antisense	non-expressed
ENSG00000204344.13	protein_coding	expressed
ENSG00000253441.1	IG_V_pseudogene	expressed
ENSG00000186469.7	protein_coding	expressed
ENSG00000270696.1	antisense	expressed
ENSG00000234224.2	protein_coding	expressed
ENSG00000216676.2	processed_pseudogene	expressed
ENSG00000212561.1	snRNA	non-expressed
ENSG00000264658.1	miRNA	non-expressed
ENSG00000253956.1	lincRNA	non-expressed
ENSG00000251287.7	protein_coding	expressed
ENSG00000167701.12	protein_coding	expressed
ENSG00000204933.3	unprocessed_pseudogene	expressed
ENSG00000268505.1	lincRNA	expressed
ENSG00000259268.1	lincRNA	expressed
ENSG00000280799.1	unprocessed_pseudogene	non-expressed
ENSG00000276564.1	lincRNA	expressed
ENSG00000264911.1	processed_pseudogene	non-expressed
ENSG00000072135.11	protein_coding	expressed
ENSG00000110321.14	protein_coding	expressed
ENSG00000079739.14	protein_coding	expressed
ENSG00000019991.14	protein_coding	expressed
ENSG00000183668.16	protein_coding	expressed
ENSG00000154146.11	protein_coding	expressed
ENSG00000254973.1	lincRNA	expressed
ENSG00000174123.9	protein_coding	expressed
ENSG00000221074.1	miRNA	non-expressed
ENSG00000214903.4	processed_pseudogene	non-expressed
ENSG00000232627.1	processed_pseudogene	non-expressed
ENSG00000254017.1	IG_C_pseudogene	expressed
ENSG00000126264.8	protein_coding	expressed
ENSG00000214878.2	processed_pseudogene	non-expressed
ENSG00000224809.2	processed_pseudogene	non-expressed
ENSG00000180011.6	protein_coding	expressed
ENSG00000265737.1	antisense	expressed
ENSG00000279054.1	protein_coding	non-expressed
ENSG00000122484.8	protein_coding	expressed
ENSG00000264500.1	miRNA	non-expressed
ENSG00000279106.1	TEC	expressed
ENSG00000200040.1	misc_RNA	non-expressed
ENSG00000241654.1	processed_pseudogene	non-expressed
ENSG00000279604.1	TEC	non-expressed
ENSG00000136059.13	protein_coding	expressed
ENSG00000230484.2	unitary_pseudogene	non-expressed
ENSG00000233262.1	antisense	non-expressed
ENSG00000266203.1	miRNA	non-expressed
ENSG00000248551.1	lincRNA	non-expressed
ENSG00000267137.1	antisense	non-expressed
ENSG00000253526.1	lincRNA	non-expressed
ENSG00000215845.9	protein_coding	expressed
ENSG00000276252.1	miRNA	expressed
ENSG00000256011.1	antisense	non-expressed
ENSG00000223273.1	misc_RNA	non-expressed
ENSG00000276056.1	miRNA	non-expressed
ENSG00000178750.2	protein_coding	expressed
ENSG00000235843.1	antisense	non-expressed
ENSG00000258845.1	lincRNA	non-expressed
ENSG00000224781.1	processed_pseudogene	expressed
ENSG00000228056.3	processed_pseudogene	non-expressed
ENSG00000280731.1	miRNA	non-expressed
ENSG00000188153.11	protein_coding	expressed
ENSG00000255776.1	processed_pseudogene	non-expressed
ENSG00000234427.1	lincRNA	expressed
ENSG00000279717.1	TEC	expressed
ENSG00000264288.1	miRNA	non-expressed
ENSG00000101470.8	protein_coding	expressed
ENSG00000232671.4	antisense	expressed
ENSG00000177023.2	protein_coding	non-expressed
ENSG00000247595.2	processed_transcript	expressed
ENSG00000220157.4	processed_pseudogene	expressed
ENSG00000270435.1	processed_pseudogene	non-expressed
ENSG00000185825.14	protein_coding	expressed
ENSG00000053501.11	protein_coding	expressed
ENSG00000253768.1	lincRNA	expressed
ENSG00000267653.1	lincRNA	expressed
ENSG00000196248.4	protein_coding	non-expressed
ENSG00000111049.3	protein_coding	non-expressed
ENSG00000204832.8	antisense	expressed
ENSG00000258380.1	antisense	non-expressed
ENSG00000106723.15	protein_coding	expressed
ENSG00000255067.1	sense_intronic	non-expressed
ENSG00000270293.1	processed_pseudogene	non-expressed
ENSG00000140107.10	protein_coding	expressed
ENSG00000221065.1	miRNA	non-expressed
ENSG00000116525.12	protein_coding	expressed
ENSG00000206800.1	misc_RNA	non-expressed
ENSG00000220537.1	processed_pseudogene	non-expressed
ENSG00000279200.1	TEC	expressed
ENSG00000254858.8	protein_coding	expressed
ENSG00000200645.1	snRNA	non-expressed
ENSG00000165917.8	protein_coding	expressed
ENSG00000160766.13	transcribed_unprocessed_pseudogene	expressed
ENSG00000199480.1	rRNA	non-expressed
ENSG00000167165.17	protein_coding	expressed
ENSG00000153291.14	protein_coding	expressed
ENSG00000252978.1	misc_RNA	non-expressed
ENSG00000273763.1	processed_pseudogene	expressed
ENSG00000270526.1	processed_pseudogene	non-expressed
ENSG00000265493.1	miRNA	non-expressed
ENSG00000177669.3	protein_coding	expressed
ENSG00000198298.11	protein_coding	expressed
ENSG00000240970.1	processed_pseudogene	expressed
ENSG00000180139.11	antisense	expressed
ENSG00000120471.13	protein_coding	expressed
ENSG00000277127.1	misc_RNA	non-expressed
ENSG00000252854.1	misc_RNA	non-expressed
ENSG00000224537.1	unprocessed_pseudogene	non-expressed
ENSG00000120306.8	protein_coding	expressed
ENSG00000270911.1	processed_pseudogene	non-expressed
ENSG00000167088.9	protein_coding	expressed
ENSG00000204887.4	protein_coding	non-expressed
ENSG00000264693.1	lincRNA	non-expressed
ENSG00000074695.5	protein_coding	expressed
ENSG00000214255.5	processed_pseudogene	non-expressed
ENSG00000092377.12	protein_coding	expressed
ENSG00000180767.8	protein_coding	expressed
ENSG00000214176.8	transcribed_unprocessed_pseudogene	expressed
ENSG00000263307.1	antisense	expressed
ENSG00000273295.1	lincRNA	expressed
ENSG00000173093.11	protein_coding	non-expressed
ENSG00000089693.9	protein_coding	expressed
ENSG00000280194.1	TEC	expressed
ENSG00000088970.14	protein_coding	expressed
ENSG00000183876.8	protein_coding	expressed
ENSG00000264779.1	miRNA	non-expressed
ENSG00000252601.1	snoRNA	non-expressed
ENSG00000252357.1	misc_RNA	non-expressed
ENSG00000148925.9	protein_coding	expressed
ENSG00000230476.1	unprocessed_pseudogene	non-expressed
ENSG00000213213.12	protein_coding	expressed
ENSG00000104093.12	protein_coding	expressed
ENSG00000251435.1	processed_pseudogene	non-expressed
ENSG00000225764.1	antisense	expressed
ENSG00000255976.1	processed_pseudogene	non-expressed
ENSG00000280063.1	TEC	expressed
ENSG00000233869.1	processed_pseudogene	non-expressed
ENSG00000264429.1	miRNA	non-expressed
ENSG00000185304.13	protein_coding	expressed
ENSG00000207116.1	snRNA	non-expressed
ENSG00000251035.1	processed_pseudogene	non-expressed
ENSG00000074266.16	protein_coding	expressed
ENSG00000156574.8	protein_coding	expressed
ENSG00000248256.1	antisense	expressed
ENSG00000214702.6	unprocessed_pseudogene	non-expressed
ENSG00000266481.1	miRNA	non-expressed
ENSG00000232949.1	antisense	expressed
ENSG00000115233.10	protein_coding	expressed
ENSG00000214290.6	protein_coding	expressed
ENSG00000270661.1	lincRNA	expressed
ENSG00000211866.1	TR_J_gene	non-expressed
ENSG00000239605.7	protein_coding	expressed
ENSG00000259660.2	transcribed_unprocessed_pseudogene	expressed
ENSG00000197838.4	protein_coding	expressed
ENSG00000127946.15	protein_coding	expressed
ENSG00000197576.12	protein_coding	expressed
ENSG00000248533.1	lincRNA	non-expressed
ENSG00000270139.1	lincRNA	non-expressed
ENSG00000271046.1	lincRNA	expressed
ENSG00000053918.14	protein_coding	expressed
ENSG00000226461.3	unprocessed_pseudogene	non-expressed
ENSG00000215183.4	protein_coding	non-expressed
ENSG00000258308.4	lincRNA	expressed
ENSG00000089006.15	protein_coding	expressed
ENSG00000234262.1	unprocessed_pseudogene	expressed
ENSG00000277939.1	miRNA	non-expressed
ENSG00000200887.1	snRNA	non-expressed
ENSG00000149633.10	protein_coding	expressed
ENSG00000257365.6	protein_coding	expressed
ENSG00000185650.9	protein_coding	expressed
ENSG00000202159.1	snRNA	non-expressed
ENSG00000254741.1	antisense	non-expressed
ENSG00000278393.1	miRNA	non-expressed
ENSG00000221347.1	miRNA	non-expressed
ENSG00000264340.1	antisense	non-expressed
ENSG00000132842.12	protein_coding	expressed
ENSG00000167748.9	protein_coding	expressed
ENSG00000211482.1	miRNA	expressed
ENSG00000224078.11	processed_transcript	expressed
ENSG00000200281.1	snRNA	non-expressed
ENSG00000233061.1	sense_intronic	expressed
ENSG00000254568.1	antisense	non-expressed
ENSG00000237941.2	antisense	expressed
ENSG00000137807.12	protein_coding	expressed
ENSG00000231566.1	lincRNA	expressed
ENSG00000201761.1	snRNA	non-expressed
ENSG00000100302.6	protein_coding	expressed
ENSG00000254066.1	lincRNA	non-expressed
ENSG00000235333.3	transcribed_unprocessed_pseudogene	non-expressed
ENSG00000207475.1	snoRNA	expressed
ENSG00000248850.1	processed_pseudogene	non-expressed
ENSG00000143740.13	protein_coding	expressed
ENSG00000274622.2	miRNA	non-expressed
ENSG00000224563.1	antisense	non-expressed
ENSG00000277810.1	miRNA	non-expressed
ENSG00000163046.14	protein_coding	non-expressed
ENSG00000116001.14	protein_coding	expressed
ENSG00000198947.13	protein_coding	expressed
ENSG00000225006.1	lincRNA	non-expressed
ENSG00000275014.1	misc_RNA	non-expressed
ENSG00000229917.2	processed_pseudogene	expressed
ENSG00000149218.4	protein_coding	expressed
ENSG00000237702.2	TR_V_gene	expressed
ENSG00000215223.3	processed_pseudogene	expressed
ENSG00000226779.1	antisense	expressed
ENSG00000218227.3	processed_pseudogene	expressed
ENSG00000008517.15	protein_coding	expressed
ENSG00000260259.1	lincRNA	expressed
ENSG00000272096.2	misc_RNA	non-expressed
ENSG00000233126.3	processed_pseudogene	non-expressed
ENSG00000226771.1	antisense	non-expressed
ENSG00000201113.1	snRNA	non-expressed
ENSG00000221438.1	miRNA	non-expressed
ENSG00000137074.17	protein_coding	expressed
ENSG00000179598.5	protein_coding	expressed
ENSG00000257103.7	protein_coding	expressed
ENSG00000205730.6	protein_coding	expressed
ENSG00000267465.5	lincRNA	non-expressed
ENSG00000240777.2	lincRNA	non-expressed
ENSG00000114853.12	protein_coding	expressed
ENSG00000102003.9	protein_coding	expressed
ENSG00000234497.4	antisense	non-expressed
ENSG00000223878.1	processed_pseudogene	expressed
ENSG00000202269.1	snoRNA	non-expressed
ENSG00000158850.13	protein_coding	expressed
ENSG00000206888.1	snRNA	non-expressed
ENSG00000231305.3	antisense	expressed
ENSG00000215399.2	processed_pseudogene	expressed
ENSG00000255549.2	unprocessed_pseudogene	non-expressed
ENSG00000215149.3	processed_pseudogene	non-expressed
ENSG00000238131.1	lincRNA	non-expressed
ENSG00000279067.1	TEC	expressed
ENSG00000196917.5	protein_coding	expressed
ENSG00000204315.3	protein_coding	expressed
ENSG00000223704.1	lincRNA	expressed
ENSG00000233447.1	unprocessed_pseudogene	non-expressed
ENSG00000166509.9	protein_coding	expressed
ENSG00000201638.2	misc_RNA	non-expressed
ENSG00000242659.1	lincRNA	expressed
ENSG00000255690.2	protein_coding	expressed
ENSG00000201492.1	rRNA	expressed
ENSG00000200537.1	misc_RNA	non-expressed
ENSG00000198944.5	protein_coding	expressed
ENSG00000249951.1	lincRNA	non-expressed
ENSG00000258524.1	processed_pseudogene	expressed
ENSG00000135862.5	protein_coding	expressed
ENSG00000275727.1	miRNA	non-expressed
ENSG00000017427.14	protein_coding	expressed
ENSG00000263618.4	lincRNA	non-expressed
ENSG00000168619.14	protein_coding	expressed
ENSG00000278370.1	lincRNA	expressed
ENSG00000203858.3	unprocessed_pseudogene	non-expressed
ENSG00000250242.1	lincRNA	non-expressed
ENSG00000158050.4	protein_coding	expressed
ENSG00000242550.4	protein_coding	expressed
ENSG00000159069.12	protein_coding	expressed
ENSG00000252454.2	miRNA	non-expressed
ENSG00000181395.6	pseudogene	non-expressed
ENSG00000127914.15	protein_coding	expressed
ENSG00000232884.6	lincRNA	expressed
ENSG00000242477.1	processed_pseudogene	expressed
ENSG00000257905.1	processed_pseudogene	expressed
ENSG00000274180.1	protein_coding	expressed
ENSG00000277299.1	antisense	expressed
ENSG00000274222.1	miRNA	non-expressed
ENSG00000171310.9	protein_coding	expressed
ENSG00000235303.1	lincRNA	non-expressed
ENSG00000274770.1	miRNA	non-expressed
ENSG00000269388.1	transcribed_processed_pseudogene	expressed
ENSG00000167526.12	protein_coding	expressed
ENSG00000229965.1	processed_pseudogene	expressed
ENSG00000171714.10	protein_coding	expressed
ENSG00000235776.2	processed_pseudogene	expressed
ENSG00000259186.1	processed_pseudogene	non-expressed
ENSG00000204657.3	protein_coding	expressed
ENSG00000279297.1	TEC	non-expressed
ENSG00000164331.8	protein_coding	expressed
ENSG00000275833.1	unprocessed_pseudogene	expressed
ENSG00000272692.1	lincRNA	expressed
ENSG00000214067.2	processed_pseudogene	non-expressed
ENSG00000281887.1	protein_coding	non-expressed
ENSG00000228373.2	processed_pseudogene	non-expressed
ENSG00000101310.13	protein_coding	expressed
ENSG00000272798.1	lincRNA	expressed
ENSG00000125107.15	protein_coding	expressed
ENSG00000237682.2	processed_pseudogene	non-expressed
ENSG00000202434.1	snoRNA	non-expressed
ENSG00000153303.15	protein_coding	expressed
ENSG00000251834.1	snRNA	non-expressed
ENSG00000182704.7	protein_coding	expressed
ENSG00000267874.1	sense_intronic	non-expressed
ENSG00000240309.1	processed_pseudogene	non-expressed
ENSG00000135222.6	protein_coding	non-expressed
ENSG00000158125.8	protein_coding	expressed
ENSG00000101892.10	protein_coding	non-expressed
ENSG00000256025.1	antisense	non-expressed
ENSG00000200274.1	snRNA	non-expressed
ENSG00000162368.12	protein_coding	expressed
ENSG00000275070.1	misc_RNA	expressed
ENSG00000105270.13	protein_coding	expressed
ENSG00000272237.1	snoRNA	non-expressed
ENSG00000268912.1	lincRNA	expressed
ENSG00000160202.6	protein_coding	non-expressed
ENSG00000234886.1	processed_pseudogene	non-expressed
ENSG00000212593.1	snoRNA	non-expressed
ENSG00000235565.1	lincRNA	expressed
ENSG00000204308.7	protein_coding	expressed
ENSG00000275693.1	misc_RNA	non-expressed
ENSG00000230294.4	lincRNA	non-expressed
ENSG00000126903.14	protein_coding	expressed
ENSG00000174165.6	protein_coding	expressed
ENSG00000234864.1	lincRNA	non-expressed
ENSG00000255076.2	sense_intronic	non-expressed
ENSG00000143751.9	protein_coding	expressed
ENSG00000150676.11	protein_coding	expressed
ENSG00000277125.1	unprocessed_pseudogene	non-expressed
ENSG00000178596.10	processed_pseudogene	non-expressed
ENSG00000222744.1	misc_RNA	non-expressed
ENSG00000253554.4	antisense	expressed
ENSG00000204429.4	processed_pseudogene	expressed
ENSG00000225809.1	unprocessed_pseudogene	non-expressed
ENSG00000277008.1	unprocessed_pseudogene	non-expressed
ENSG00000111254.6	protein_coding	expressed
ENSG00000243669.2	processed_pseudogene	non-expressed
ENSG00000110871.13	protein_coding	expressed
ENSG00000263326.1	unprocessed_pseudogene	expressed
ENSG00000271691.1	unprocessed_pseudogene	non-expressed
ENSG00000266711.1	antisense	non-expressed
ENSG00000231169.4	processed_pseudogene	expressed
ENSG00000257582.4	lincRNA	non-expressed
ENSG00000258450.1	sense_intronic	expressed
ENSG00000171657.5	protein_coding	expressed
ENSG00000265883.1	processed_pseudogene	non-expressed
ENSG00000204092.2	lincRNA	expressed
ENSG00000142798.15	protein_coding	expressed
ENSG00000241074.3	misc_RNA	non-expressed
ENSG00000272129.1	lincRNA	expressed
ENSG00000234756.1	lincRNA	expressed
ENSG00000232946.1	processed_pseudogene	expressed
ENSG00000258136.1	antisense	expressed
ENSG00000214684.2	processed_pseudogene	non-expressed
ENSG00000259009.4	unprocessed_pseudogene	non-expressed
ENSG00000248766.2	processed_pseudogene	non-expressed
ENSG00000258375.2	processed_pseudogene	non-expressed
ENSG00000271121.2	processed_pseudogene	non-expressed
ENSG00000242082.1	antisense	expressed
ENSG00000280272.1	TEC	non-expressed
ENSG00000151422.11	protein_coding	expressed
ENSG00000079263.17	protein_coding	expressed
ENSG00000174576.7	protein_coding	expressed
ENSG00000183878.14	protein_coding	expressed
ENSG00000259861.1	lincRNA	non-expressed
ENSG00000226450.2	unprocessed_pseudogene	expressed
ENSG00000228074.1	processed_pseudogene	expressed
ENSG00000230801.1	processed_pseudogene	non-expressed
ENSG00000234464.1	lincRNA	non-expressed
ENSG00000237480.1	lincRNA	non-expressed
ENSG00000222397.1	misc_RNA	non-expressed
ENSG00000163531.14	protein_coding	expressed
ENSG00000216904.2	processed_pseudogene	non-expressed
ENSG00000239998.4	protein_coding	expressed
ENSG00000211942.3	IG_V_gene	expressed
ENSG00000233264.2	processed_pseudogene	expressed
ENSG00000162980.15	protein_coding	expressed
ENSG00000206958.1	snoRNA	non-expressed
ENSG00000112855.13	protein_coding	expressed
ENSG00000265073.1	antisense	non-expressed
ENSG00000278076.1	miRNA	non-expressed
ENSG00000162402.11	protein_coding	expressed
ENSG00000277483.1	misc_RNA	non-expressed
ENSG00000201747.1	snRNA	non-expressed
ENSG00000101191.15	protein_coding	expressed
ENSG00000237743.3	transcribed_unprocessed_pseudogene	non-expressed
ENSG00000279541.1	TEC	expressed
ENSG00000146926.9	protein_coding	expressed
ENSG00000265752.2	lincRNA	expressed
ENSG00000178934.4	protein_coding	expressed
ENSG00000233684.2	lincRNA	non-expressed
ENSG00000263707.1	antisense	non-expressed
ENSG00000136213.9	protein_coding	expressed
ENSG00000259781.1	processed_pseudogene	expressed
ENSG00000010810.16	protein_coding	expressed
ENSG00000153048.9	protein_coding	expressed
ENSG00000234257.1	processed_pseudogene	non-expressed
ENSG00000261039.2	lincRNA	expressed
ENSG00000124212.5	protein_coding	expressed
ENSG00000124406.15	protein_coding	expressed
ENSG00000120699.11	protein_coding	expressed
ENSG00000211912.1	IG_D_gene	non-expressed
ENSG00000280122.1	TEC	non-expressed
ENSG00000186479.4	protein_coding	expressed
ENSG00000123066.6	protein_coding	expressed
ENSG00000221424.1	miRNA	expressed
ENSG00000224209.5	lincRNA	expressed
ENSG00000144827.7	protein_coding	expressed
ENSG00000272832.1	lincRNA	expressed
ENSG00000270093.1	lincRNA	expressed
ENSG00000164488.10	protein_coding	expressed
ENSG00000258036.1	unprocessed_pseudogene	non-expressed
ENSG00000265631.1	processed_pseudogene	non-expressed
ENSG00000256294.6	protein_coding	expressed
ENSG00000206931.1	snRNA	non-expressed
ENSG00000200693.2	snoRNA	expressed
ENSG00000211683.3	processed_transcript	expressed
ENSG00000266656.1	miRNA	non-expressed
ENSG00000258408.1	processed_pseudogene	expressed
ENSG00000262663.1	lincRNA	expressed
ENSG00000201707.1	snRNA	non-expressed
ENSG00000170325.13	protein_coding	expressed
ENSG00000267162.1	processed_pseudogene	non-expressed
ENSG00000199153.1	miRNA	non-expressed
ENSG00000224204.1	antisense	expressed
ENSG00000103460.15	protein_coding	expressed
ENSG00000188334.3	protein_coding	non-expressed
ENSG00000182591.5	protein_coding	non-expressed
ENSG00000277592.1	misc_RNA	non-expressed
ENSG00000249038.2	processed_pseudogene	non-expressed
ENSG00000259621.1	antisense	non-expressed
ENSG00000271049.1	processed_pseudogene	expressed
ENSG00000269927.1	lincRNA	expressed
ENSG00000206858.1	misc_RNA	non-expressed
ENSG00000241064.3	misc_RNA	non-expressed
ENSG00000229528.1	antisense	non-expressed
ENSG00000264879.2	misc_RNA	non-expressed
ENSG00000239393.1	processed_pseudogene	non-expressed
ENSG00000240821.1	processed_pseudogene	non-expressed
ENSG00000266666.1	miRNA	non-expressed
ENSG00000250427.1	lincRNA	non-expressed
ENSG00000250486.3	protein_coding	expressed
ENSG00000244649.3	lincRNA	expressed
ENSG00000083838.14	protein_coding	expressed
ENSG00000134255.12	protein_coding	expressed
ENSG00000165355.7	protein_coding	expressed
ENSG00000189013.13	protein_coding	expressed
ENSG00000101000.4	protein_coding	expressed
ENSG00000263990.1	lincRNA	expressed
ENSG00000279946.1	TEC	expressed
ENSG00000115947.12	protein_coding	expressed
ENSG00000230445.4	transcribed_processed_pseudogene	expressed
ENSG00000254538.1	lincRNA	non-expressed
ENSG00000227745.1	unprocessed_pseudogene	non-expressed
ENSG00000239333.3	misc_RNA	non-expressed
ENSG00000252661.1	snRNA	non-expressed
ENSG00000100441.8	protein_coding	expressed
ENSG00000233288.1	lincRNA	expressed
ENSG00000264406.1	miRNA	non-expressed
ENSG00000243538.1	processed_pseudogene	expressed
ENSG00000251438.1	antisense	non-expressed
ENSG00000215915.8	protein_coding	expressed
ENSG00000200815.1	snRNA	non-expressed
ENSG00000234283.1	lincRNA	expressed
ENSG00000143702.14	protein_coding	expressed
ENSG00000213435.3	processed_pseudogene	expressed
ENSG00000249990.1	processed_pseudogene	non-expressed
ENSG00000240241.4	lincRNA	expressed
ENSG00000226827.1	processed_pseudogene	non-expressed
ENSG00000244756.1	processed_pseudogene	non-expressed
ENSG00000198156.9	protein_coding	expressed
ENSG00000258517.1	lincRNA	non-expressed
ENSG00000251031.1	lincRNA	non-expressed
ENSG00000237363.1	unprocessed_pseudogene	non-expressed
ENSG00000226317.2	lincRNA	non-expressed
ENSG00000224906.3	processed_pseudogene	non-expressed
ENSG00000250915.1	lincRNA	non-expressed
ENSG00000204936.8	protein_coding	expressed
ENSG00000122068.11	protein_coding	expressed
ENSG00000234692.1	lincRNA	expressed
ENSG00000275315.1	unprocessed_pseudogene	non-expressed
ENSG00000228851.1	unprocessed_pseudogene	non-expressed
ENSG00000251603.1	antisense	expressed
ENSG00000226668.4	transcribed_unprocessed_pseudogene	expressed
ENSG00000238726.1	miRNA	non-expressed
ENSG00000188816.3	protein_coding	expressed
ENSG00000261600.1	lincRNA	expressed
ENSG00000119844.13	protein_coding	expressed
ENSG00000202529.1	snoRNA	non-expressed
ENSG00000214353.6	antisense	expressed
ENSG00000167770.10	protein_coding	expressed
ENSG00000256081.2	processed_pseudogene	non-expressed
ENSG00000268500.4	protein_coding	non-expressed
ENSG00000218305.3	processed_pseudogene	non-expressed
ENSG00000281593.1	protein_coding	expressed
ENSG00000257198.5	transcribed_unprocessed_pseudogene	non-expressed
ENSG00000250252.1	lincRNA	non-expressed
ENSG00000254884.1	processed_pseudogene	non-expressed
ENSG00000274124.1	antisense	expressed
ENSG00000275830.1	lincRNA	expressed
ENSG00000135083.13	protein_coding	expressed
ENSG00000254519.2	lincRNA	non-expressed
ENSG00000101367.8	protein_coding	expressed
ENSG00000273063.1	antisense	non-expressed
ENSG00000249988.1	lincRNA	non-expressed
ENSG00000166405.13	protein_coding	expressed
ENSG00000255987.1	processed_pseudogene	expressed
ENSG00000267048.1	processed_transcript	expressed
ENSG00000213315.5	processed_pseudogene	expressed
ENSG00000227799.1	processed_pseudogene	expressed
ENSG00000239900.10	protein_coding	expressed
ENSG00000271251.1	processed_pseudogene	non-expressed
ENSG00000114993.14	protein_coding	expressed
ENSG00000189332.5	transcribed_unprocessed_pseudogene	non-expressed
ENSG00000117682.15	protein_coding	expressed
ENSG00000174450.10	protein_coding	expressed
ENSG00000110169.9	protein_coding	expressed
ENSG00000010319.5	protein_coding	expressed
ENSG00000204021.3	protein_coding	expressed
ENSG00000189420.8	protein_coding	expressed
ENSG00000232065.1	antisense	expressed
ENSG00000198833.6	protein_coding	expressed
ENSG00000201048.1	misc_RNA	non-expressed
ENSG00000275126.1	protein_coding	expressed
ENSG00000258822.1	unprocessed_pseudogene	non-expressed
ENSG00000201807.1	snoRNA	non-expressed
ENSG00000256311.1	antisense	non-expressed
ENSG00000244128.4	lincRNA	expressed
ENSG00000222667.1	snRNA	non-expressed
ENSG00000211779.3	TR_V_gene	expressed
ENSG00000202427.1	snRNA	non-expressed
ENSG00000274501.1	antisense	expressed
ENSG00000259056.1	transcribed_unprocessed_pseudogene	non-expressed
ENSG00000226433.1	antisense	non-expressed
ENSG00000018625.13	protein_coding	expressed
ENSG00000165502.6	protein_coding	expressed
ENSG00000111711.8	protein_coding	expressed
ENSG00000248684.1	processed_pseudogene	non-expressed
ENSG00000172322.12	protein_coding	expressed
ENSG00000281632.1	miRNA	non-expressed
ENSG00000255029.1	lincRNA	non-expressed
ENSG00000240281.2	processed_pseudogene	non-expressed
ENSG00000122545.16	protein_coding	expressed
ENSG00000201742.1	snRNA	non-expressed
ENSG00000137804.11	protein_coding	expressed
ENSG00000202225.1	rRNA	non-expressed
ENSG00000233385.1	unprocessed_pseudogene	non-expressed
ENSG00000087116.12	protein_coding	expressed
ENSG00000221280.2	miRNA	non-expressed
ENSG00000231961.1	processed_pseudogene	non-expressed
ENSG00000226695.1	processed_pseudogene	expressed
ENSG00000115268.8	protein_coding	expressed
ENSG00000179361.16	protein_coding	expressed
ENSG00000146143.16	protein_coding	expressed
ENSG00000089050.13	protein_coding	expressed
ENSG00000259724.1	lincRNA	expressed
ENSG00000234380.1	antisense	expressed
ENSG00000103599.18	protein_coding	expressed
ENSG00000279085.1	antisense	expressed
ENSG00000107331.15	protein_coding	expressed
ENSG00000252817.2	miRNA	expressed
ENSG00000252891.1	misc_RNA	non-expressed
ENSG00000153317.13	protein_coding	expressed
ENSG00000259375.1	antisense	non-expressed
ENSG00000229030.1	processed_pseudogene	non-expressed
ENSG00000207726.2	miRNA	non-expressed
ENSG00000254428.1	antisense	expressed
ENSG00000184661.12	protein_coding	expressed
ENSG00000236252.2	transcribed_processed_pseudogene	non-expressed
ENSG00000271195.1	processed_pseudogene	non-expressed
ENSG00000237913.1	processed_pseudogene	non-expressed
ENSG00000261122.5	lincRNA	expressed
ENSG00000242405.2	processed_pseudogene	expressed
ENSG00000274127.1	misc_RNA	non-expressed
[truncated: 58,484 more rows]

## Sheet: BRCA
gene	gene_type	status
ENSG00000207922.1	miRNA	non-expressed
ENSG00000168872.14	protein_coding	expressed
ENSG00000182272.10	protein_coding	expressed
ENSG00000251686.1	unprocessed_pseudogene	non-expressed
ENSG00000108960.6	protein_coding	expressed
ENSG00000252452.1	snRNA	non-expressed
ENSG00000275075.1	processed_pseudogene	non-expressed
ENSG00000196814.13	protein_coding	expressed
ENSG00000134323.10	protein_coding	expressed
ENSG00000239373.3	misc_RNA	non-expressed
ENSG00000139537.9	protein_coding	expressed
ENSG00000145723.15	protein_coding	expressed
ENSG00000263305.1	lincRNA	non-expressed
ENSG00000204754.3	lincRNA	non-expressed
ENSG00000235011.2	lincRNA	non-expressed
ENSG00000132932.15	protein_coding	expressed
ENSG00000257115.1	protein_coding	non-expressed
ENSG00000272971.1	lincRNA	non-expressed
ENSG00000196661.3	protein_coding	non-expressed
ENSG00000197465.12	protein_coding	expressed
ENSG00000231812.1	processed_pseudogene	non-expressed
ENSG00000254586.1	lincRNA	non-expressed
ENSG00000145826.7	protein_coding	non-expressed
ENSG00000265778.2	antisense	expressed
ENSG00000200957.1	snRNA	non-expressed
ENSG00000278203.1	miRNA	non-expressed
ENSG00000117090.13	protein_coding	expressed
ENSG00000061492.10	protein_coding	non-expressed
ENSG00000237798.1	antisense	non-expressed
ENSG00000214248.2	antisense	expressed
ENSG00000213416.3	protein_coding	non-expressed
ENSG00000247151.5	antisense	expressed
ENSG00000214184.3	antisense	expressed
ENSG00000250863.1	lincRNA	non-expressed
ENSG00000197763.11	protein_coding	expressed
ENSG00000139116.16	protein_coding	expressed
ENSG00000243431.1	processed_pseudogene	expressed
ENSG00000265485.4	lincRNA	expressed
ENSG00000270750.1	lincRNA	expressed
ENSG00000116133.10	protein_coding	expressed
ENSG00000229720.1	lincRNA	expressed
ENSG00000277189.1	miRNA	non-expressed
ENSG00000227207.2	processed_pseudogene	non-expressed
ENSG00000134138.18	protein_coding	expressed
ENSG00000173262.10	protein_coding	expressed
ENSG00000212254.1	snRNA	non-expressed
ENSG00000144381.15	protein_coding	expressed
ENSG00000176896.8	protein_coding	expressed
ENSG00000225471.4	transcribed_processed_pseudogene	expressed
ENSG00000250902.1	antisense	non-expressed
ENSG00000129474.14	protein_coding	expressed
ENSG00000171476.20	protein_coding	expressed
ENSG00000280511.1	lincRNA	non-expressed
ENSG00000234551.1	lincRNA	non-expressed
ENSG00000187621.13	processed_transcript	expressed
ENSG00000138152.8	protein_coding	expressed
ENSG00000241280.1	lincRNA	expressed
ENSG00000227777.1	processed_pseudogene	non-expressed
ENSG00000177243.3	protein_coding	non-expressed
ENSG00000230838.1	lincRNA	expressed
ENSG00000268051.1	sense_intronic	non-expressed
ENSG00000255121.2	lincRNA	expressed
ENSG00000188467.9	protein_coding	non-expressed
ENSG00000245729.2	lincRNA	non-expressed
ENSG00000178965.12	protein_coding	expressed
ENSG00000277043.1	processed_pseudogene	non-expressed
ENSG00000238304.1	snRNA	non-expressed
ENSG00000178031.14	protein_coding	expressed
ENSG00000172752.13	protein_coding	expressed
ENSG00000067900.6	protein_coding	expressed
ENSG00000011114.13	protein_coding	expressed
ENSG00000130518.15	protein_coding	expressed
ENSG00000101166.14	protein_coding	expressed
ENSG00000103343.11	protein_coding	expressed
ENSG00000140553.15	protein_coding	expressed
ENSG00000203756.6	protein_coding	expressed
ENSG00000266364.1	transcribed_processed_pseudogene	non-expressed
ENSG00000025800.12	protein_coding	expressed
ENSG00000166317.10	protein_coding	expressed
ENSG00000250273.1	processed_pseudogene	non-expressed
ENSG00000243115.3	misc_RNA	non-expressed
ENSG00000184076.12	protein_coding	expressed
ENSG00000134748.12	protein_coding	expressed
ENSG00000227331.1	processed_pseudogene	expressed
ENSG00000261731.2	antisense	non-expressed
ENSG00000240767.3	misc_RNA	non-expressed
ENSG00000176387.6	protein_coding	expressed
ENSG00000241146.1	processed_pseudogene	non-expressed
ENSG00000146278.10	protein_coding	expressed
ENSG00000267679.1	processed_pseudogene	expressed
ENSG00000226200.5	antisense	expressed
ENSG00000162654.8	protein_coding	expressed
ENSG00000270612.1	processed_pseudogene	non-expressed
ENSG00000094804.8	protein_coding	expressed
ENSG00000116209.10	protein_coding	expressed
ENSG00000081853.14	protein_coding	expressed
ENSG00000248514.1	antisense	non-expressed
ENSG00000237252.1	processed_pseudogene	non-expressed
ENSG00000271100.1	processed_pseudogene	non-expressed
ENSG00000232661.1	antisense	non-expressed
ENSG00000254164.1	lincRNA	expressed
ENSG00000225639.1	processed_pseudogene	non-expressed
ENSG00000224244.1	unprocessed_pseudogene	expressed
ENSG00000269954.1	lincRNA	non-expressed
ENSG00000185519.8	protein_coding	expressed
ENSG00000159055.3	protein_coding	expressed
ENSG00000204603.5	lincRNA	non-expressed
ENSG00000201242.1	misc_RNA	non-expressed
ENSG00000242036.1	processed_pseudogene	non-expressed
ENSG00000258747.1	antisense	non-expressed
ENSG00000265744.1	miRNA	non-expressed
ENSG00000230223.5	antisense	non-expressed
ENSG00000119915.4	protein_coding	expressed
ENSG00000281273.1	protein_coding	non-expressed
ENSG00000276037.1	miRNA	non-expressed
ENSG00000103710.9	protein_coding	expressed
ENSG00000254415.3	protein_coding	expressed
ENSG00000255360.1	unprocessed_pseudogene	non-expressed
ENSG00000254710.1	antisense	non-expressed
ENSG00000276786.1	lincRNA	non-expressed
ENSG00000214003.2	processed_pseudogene	non-expressed
ENSG00000229600.1	lincRNA	non-expressed
ENSG00000234877.2	lincRNA	non-expressed
ENSG00000111674.7	protein_coding	expressed
ENSG00000252575.1	miRNA	non-expressed
ENSG00000278870.1	polymorphic_pseudogene	non-expressed
ENSG00000007168.11	protein_coding	expressed
ENSG00000236615.1	unprocessed_pseudogene	non-expressed
ENSG00000231610.1	processed_pseudogene	non-expressed
ENSG00000233120.1	unprocessed_pseudogene	non-expressed
ENSG00000179673.4	protein_coding	non-expressed
ENSG00000237115.2	processed_pseudogene	expressed
ENSG00000218809.1	unprocessed_pseudogene	non-expressed
ENSG00000221234.1	miRNA	non-expressed
ENSG00000231816.1	lincRNA	expressed
ENSG00000259389.2	processed_pseudogene	non-expressed
ENSG00000248873.1	processed_pseudogene	expressed
ENSG00000277767.1	lincRNA	expressed
ENSG00000234763.1	lincRNA	non-expressed
ENSG00000203697.10	protein_coding	expressed
ENSG00000229536.1	lincRNA	expressed
ENSG00000275084.2	snoRNA	non-expressed
ENSG00000278123.1	snoRNA	non-expressed
ENSG00000201176.1	snRNA	non-expressed
ENSG00000267383.5	antisense	expressed
ENSG00000145293.13	protein_coding	expressed
ENSG00000139910.18	protein_coding	expressed
ENSG00000228995.1	processed_pseudogene	non-expressed
ENSG00000168389.16	protein_coding	expressed
ENSG00000238561.1	snRNA	non-expressed
ENSG00000206779.1	misc_RNA	non-expressed
ENSG00000105223.17	protein_coding	expressed
ENSG00000164062.11	protein_coding	expressed
ENSG00000272288.4	antisense	expressed
ENSG00000264801.1	transcribed_processed_pseudogene	expressed
ENSG00000237449.1	unitary_pseudogene	non-expressed
ENSG00000253164.4	lincRNA	expressed
ENSG00000252316.1	misc_RNA	non-expressed
ENSG00000259856.1	processed_pseudogene	expressed
ENSG00000251546.1	IG_V_gene	expressed
ENSG00000259151.2	transcribed_processed_pseudogene	non-expressed
ENSG00000239763.2	processed_pseudogene	expressed
ENSG00000198626.14	protein_coding	expressed
ENSG00000256480.1	processed_pseudogene	non-expressed
ENSG00000272902.2	lincRNA	expressed
ENSG00000099953.8	protein_coding	expressed
ENSG00000225407.3	antisense	non-expressed
ENSG00000173275.11	protein_coding	expressed
ENSG00000271933.1	antisense	expressed
ENSG00000249811.2	protein_coding	non-expressed
ENSG00000249404.1	lincRNA	non-expressed
ENSG00000227995.1	processed_pseudogene	non-expressed
ENSG00000222842.1	misc_RNA	non-expressed
ENSG00000275220.1	miRNA	non-expressed
ENSG00000251323.2	lincRNA	expressed
ENSG00000264345.1	lincRNA	expressed
ENSG00000223652.2	antisense	expressed
ENSG00000230650.1	processed_pseudogene	expressed
ENSG00000277987.1	lincRNA	expressed
ENSG00000134900.10	protein_coding	expressed
ENSG00000207548.2	miRNA	non-expressed
ENSG00000224943.1	lincRNA	non-expressed
ENSG00000278907.1	antisense	non-expressed
ENSG00000262151.1	antisense	non-expressed
ENSG00000259347.4	lincRNA	expressed
ENSG00000160396.8	protein_coding	expressed
ENSG00000177888.7	protein_coding	expressed
ENSG00000177990.10	protein_coding	expressed
ENSG00000235750.8	protein_coding	expressed
ENSG00000276150.1	misc_RNA	non-expressed
ENSG00000238448.1	miRNA	non-expressed
ENSG00000159445.11	protein_coding	expressed
ENSG00000267150.1	antisense	expressed
ENSG00000232109.1	processed_pseudogene	non-expressed
ENSG00000137675.4	protein_coding	expressed
ENSG00000229531.4	antisense	non-expressed
ENSG00000178458.5	processed_pseudogene	expressed
ENSG00000207559.1	miRNA	non-expressed
ENSG00000006432.14	protein_coding	expressed
ENSG00000260307.2	processed_pseudogene	non-expressed
ENSG00000259115.1	lincRNA	non-expressed
ENSG00000235831.5	antisense	expressed
ENSG00000226804.4	processed_pseudogene	non-expressed
ENSG00000155561.13	protein_coding	expressed
ENSG00000223966.1	antisense	non-expressed
ENSG00000236246.1	processed_pseudogene	non-expressed
ENSG00000106927.10	protein_coding	expressed
ENSG00000224732.1	unprocessed_pseudogene	non-expressed
ENSG00000197959.12	protein_coding	expressed
ENSG00000188313.11	protein_coding	expressed
ENSG00000231990.1	lincRNA	non-expressed
ENSG00000253869.1	processed_pseudogene	expressed
ENSG00000279227.1	TEC	expressed
ENSG00000270493.1	processed_pseudogene	non-expressed
ENSG00000120280.5	protein_coding	expressed
ENSG00000280039.1	TEC	expressed
ENSG00000128641.16	protein_coding	expressed
ENSG00000211944.2	IG_V_gene	non-expressed
ENSG00000255148.2	antisense	non-expressed
ENSG00000153060.6	protein_coding	expressed
ENSG00000270623.1	processed_pseudogene	non-expressed
ENSG00000275467.1	lincRNA	non-expressed
ENSG00000153898.11	protein_coding	expressed
ENSG00000003249.12	protein_coding	expressed
ENSG00000149506.9	protein_coding	expressed
ENSG00000106809.9	protein_coding	expressed
ENSG00000153310.17	protein_coding	expressed
ENSG00000259252.1	lincRNA	non-expressed
ENSG00000259518.1	lincRNA	non-expressed
ENSG00000218730.1	processed_pseudogene	non-expressed
ENSG00000126583.9	protein_coding	expressed
ENSG00000278128.1	processed_pseudogene	non-expressed
ENSG00000223387.5	lincRNA	expressed
ENSG00000200262.1	misc_RNA	non-expressed
ENSG00000199071.2	miRNA	non-expressed
ENSG00000105255.9	protein_coding	expressed
ENSG00000256609.1	antisense	non-expressed
ENSG00000258509.1	processed_pseudogene	non-expressed
ENSG00000270558.1	processed_pseudogene	expressed
ENSG00000197024.7	protein_coding	expressed
ENSG00000257355.1	protein_coding	non-expressed
ENSG00000237460.2	lincRNA	non-expressed
ENSG00000175197.9	protein_coding	expressed
ENSG00000075651.14	protein_coding	expressed
ENSG00000165092.11	protein_coding	expressed
ENSG00000266151.1	miRNA	non-expressed
ENSG00000252959.1	rRNA	non-expressed
ENSG00000233960.1	lincRNA	non-expressed
ENSG00000109625.17	protein_coding	expressed
ENSG00000268030.1	antisense	expressed
ENSG00000221628.1	miRNA	non-expressed
ENSG00000270605.1	antisense	expressed
ENSG00000244361.1	processed_pseudogene	non-expressed
ENSG00000224256.1	processed_pseudogene	non-expressed
ENSG00000266189.1	miRNA	expressed
ENSG00000170745.10	protein_coding	expressed
ENSG00000127995.15	protein_coding	expressed
ENSG00000279153.1	TEC	non-expressed
ENSG00000276692.1	processed_pseudogene	non-expressed
ENSG00000225640.1	lincRNA	non-expressed
ENSG00000227958.1	lincRNA	non-expressed
ENSG00000234354.3	processed_pseudogene	expressed
ENSG00000125868.14	protein_coding	expressed
ENSG00000237807.3	lincRNA	expressed
ENSG00000168137.14	protein_coding	expressed
ENSG00000182472.7	protein_coding	expressed
ENSG00000252983.1	snRNA	non-expressed
ENSG00000275716.1	processed_pseudogene	non-expressed
ENSG00000273497.1	unprocessed_pseudogene	non-expressed
ENSG00000251113.2	processed_pseudogene	non-expressed
ENSG00000213149.3	processed_pseudogene	expressed
ENSG00000173124.13	protein_coding	expressed
ENSG00000141985.8	protein_coding	expressed
ENSG00000168748.12	protein_coding	expressed
ENSG00000004776.10	protein_coding	expressed
ENSG00000228577.1	antisense	non-expressed
ENSG00000272113.2	misc_RNA	non-expressed
ENSG00000134443.8	protein_coding	expressed
ENSG00000201470.1	misc_RNA	non-expressed
ENSG00000252745.1	rRNA	non-expressed
ENSG00000185792.8	protein_coding	expressed
ENSG00000106327.11	protein_coding	expressed
ENSG00000112837.15	protein_coding	expressed
ENSG00000254860.4	antisense	expressed
ENSG00000267308.1	lincRNA	expressed
ENSG00000180747.14	transcribed_unprocessed_pseudogene	expressed
ENSG00000187122.15	protein_coding	expressed
ENSG00000142089.14	protein_coding	expressed
ENSG00000278348.1	misc_RNA	non-expressed
ENSG00000221016.1	miRNA	non-expressed
ENSG00000187792.4	protein_coding	expressed
ENSG00000124678.16	protein_coding	expressed
ENSG00000186369.8	lincRNA	expressed
ENSG00000239525.1	processed_pseudogene	non-expressed
ENSG00000140525.16	protein_coding	expressed
ENSG00000255545.6	processed_transcript	expressed
ENSG00000240533.3	misc_RNA	non-expressed
ENSG00000254279.1	IG_V_pseudogene	non-expressed
ENSG00000250260.1	lincRNA	non-expressed
ENSG00000164972.11	protein_coding	expressed
ENSG00000244260.1	lincRNA	non-expressed
ENSG00000156261.11	protein_coding	expressed
ENSG00000236844.1	processed_pseudogene	non-expressed
ENSG00000046653.13	protein_coding	expressed
ENSG00000277861.1	miRNA	non-expressed
ENSG00000145882.9	protein_coding	expressed
ENSG00000229654.1	lincRNA	non-expressed
ENSG00000241188.3	misc_RNA	non-expressed
ENSG00000275229.1	snRNA	non-expressed
ENSG00000200220.1	snRNA	non-expressed
ENSG00000265691.1	miRNA	non-expressed
ENSG00000239465.1	processed_pseudogene	non-expressed
ENSG00000175143.3	protein_coding	non-expressed
ENSG00000187533.12	protein_coding	non-expressed
ENSG00000277682.1	miRNA	non-expressed
ENSG00000183909.5	unprocessed_pseudogene	non-expressed
ENSG00000265820.1	miRNA	non-expressed
ENSG00000239988.1	processed_pseudogene	non-expressed
ENSG00000232778.1	processed_pseudogene	non-expressed
ENSG00000267452.1	lincRNA	expressed
ENSG00000279925.1	TEC	non-expressed
ENSG00000227140.3	protein_coding	non-expressed
ENSG00000280945.1	miRNA	non-expressed
ENSG00000276764.1	misc_RNA	non-expressed
ENSG00000276678.1	misc_RNA	non-expressed
ENSG00000238644.1	miRNA	non-expressed
ENSG00000221803.1	snoRNA	non-expressed
ENSG00000251400.1	processed_pseudogene	expressed
ENSG00000259374.2	transcribed_processed_pseudogene	expressed
ENSG00000176246.1	protein_coding	non-expressed
ENSG00000131943.16	protein_coding	expressed
ENSG00000198491.3	antisense	non-expressed
ENSG00000104472.8	protein_coding	expressed
ENSG00000239917.3	unprocessed_pseudogene	expressed
ENSG00000253571.1	processed_pseudogene	non-expressed
ENSG00000224918.1	lincRNA	non-expressed
ENSG00000212073.1	miRNA	non-expressed
ENSG00000212348.1	snRNA	non-expressed
ENSG00000259498.1	antisense	expressed
ENSG00000159259.7	protein_coding	expressed
ENSG00000262877.4	lincRNA	expressed
ENSG00000138600.8	protein_coding	expressed
ENSG00000215326.3	processed_pseudogene	expressed
ENSG00000214853.4	processed_pseudogene	non-expressed
ENSG00000276729.1	misc_RNA	non-expressed
ENSG00000146383.7	protein_coding	non-expressed
ENSG00000250976.1	antisense	non-expressed
ENSG00000201407.1	snoRNA	non-expressed
ENSG00000229862.4	antisense	non-expressed
ENSG00000257219.4	lincRNA	expressed
ENSG00000184571.12	protein_coding	non-expressed
ENSG00000237260.1	processed_pseudogene	non-expressed
ENSG00000237804.1	processed_pseudogene	expressed
ENSG00000264897.1	miRNA	non-expressed
ENSG00000231913.1	processed_pseudogene	non-expressed
ENSG00000279018.1	protein_coding	non-expressed
ENSG00000225637.1	lincRNA	non-expressed
ENSG00000280636.1	snoRNA	non-expressed
ENSG00000279645.1	TEC	non-expressed
ENSG00000244998.1	antisense	expressed
ENSG00000223728.3	processed_pseudogene	non-expressed
ENSG00000258623.1	antisense	expressed
ENSG00000225520.1	lincRNA	non-expressed
ENSG00000188755.8	transcribed_unprocessed_pseudogene	non-expressed
ENSG00000232998.1	antisense	non-expressed
ENSG00000163872.14	protein_coding	expressed
ENSG00000165671.17	protein_coding	expressed
ENSG00000135387.18	protein_coding	expressed
ENSG00000272742.1	antisense	non-expressed
ENSG00000225536.2	processed_pseudogene	non-expressed
ENSG00000229832.1	sense_intronic	expressed
ENSG00000150750.6	protein_coding	expressed
ENSG00000105254.10	protein_coding	expressed
ENSG00000256861.1	protein_coding	non-expressed
ENSG00000235903.6	antisense	expressed
ENSG00000230746.1	lincRNA	non-expressed
ENSG00000231104.7	antisense	expressed
ENSG00000165309.12	protein_coding	expressed
ENSG00000233750.3	processed_pseudogene	expressed
ENSG00000239057.1	miRNA	non-expressed
ENSG00000235875.3	antisense	expressed
ENSG00000138642.13	protein_coding	expressed
ENSG00000233017.2	antisense	expressed
ENSG00000264519.2	misc_RNA	non-expressed
ENSG00000168209.4	protein_coding	expressed
ENSG00000149923.12	protein_coding	expressed
ENSG00000237458.1	processed_pseudogene	non-expressed
ENSG00000088305.17	protein_coding	expressed
ENSG00000214832.5	transcribed_processed_pseudogene	expressed
ENSG00000211681.2	IG_J_gene	non-expressed
ENSG00000260113.3	processed_pseudogene	non-expressed
ENSG00000255136.2	lincRNA	non-expressed
ENSG00000133639.4	protein_coding	expressed
ENSG00000243147.6	protein_coding	expressed
ENSG00000199237.1	snRNA	non-expressed
ENSG00000207127.1	misc_RNA	non-expressed
ENSG00000108591.8	protein_coding	expressed
ENSG00000211538.1	miRNA	non-expressed
ENSG00000265639.1	processed_pseudogene	non-expressed
ENSG00000250300.1	unprocessed_pseudogene	non-expressed
ENSG00000280401.1	TEC	expressed
ENSG00000274390.1	miRNA	non-expressed
ENSG00000258963.1	unprocessed_pseudogene	non-expressed
ENSG00000199634.1	snRNA	non-expressed
ENSG00000222997.1	misc_RNA	non-expressed
ENSG00000254290.1	lincRNA	expressed
ENSG00000279058.1	protein_coding	expressed
ENSG00000249284.1	processed_pseudogene	non-expressed
ENSG00000273694.1	snRNA	non-expressed
ENSG00000271397.1	processed_pseudogene	non-expressed
ENSG00000142945.11	protein_coding	expressed
ENSG00000242278.1	processed_pseudogene	non-expressed
ENSG00000199218.1	misc_RNA	non-expressed
ENSG00000201523.1	rRNA	non-expressed
ENSG00000156414.17	protein_coding	expressed
ENSG00000134086.7	protein_coding	expressed
ENSG00000132640.13	protein_coding	expressed
ENSG00000167634.11	protein_coding	expressed
ENSG00000204991.9	protein_coding	expressed
ENSG00000240791.1	unprocessed_pseudogene	non-expressed
ENSG00000220113.2	processed_pseudogene	non-expressed
ENSG00000253203.5	transcribed_unprocessed_pseudogene	expressed
ENSG00000225302.2	antisense	expressed
ENSG00000111843.12	protein_coding	expressed
ENSG00000258591.2	processed_pseudogene	expressed
ENSG00000268812.3	antisense	expressed
ENSG00000274092.1	antisense	expressed
ENSG00000149243.14	protein_coding	expressed
ENSG00000250173.1	lincRNA	non-expressed
ENSG00000241956.8	antisense	non-expressed
ENSG00000250622.1	processed_pseudogene	non-expressed
ENSG00000248521.1	processed_pseudogene	non-expressed
ENSG00000201348.1	snoRNA	non-expressed
ENSG00000204175.5	protein_coding	expressed
ENSG00000225352.1	processed_pseudogene	non-expressed
ENSG00000101966.11	protein_coding	expressed
ENSG00000253054.1	snRNA	non-expressed
ENSG00000215483.7	lincRNA	expressed
ENSG00000207387.1	misc_RNA	non-expressed
ENSG00000213924.3	processed_pseudogene	non-expressed
ENSG00000162616.8	protein_coding	expressed
ENSG00000183474.14	protein_coding	expressed
ENSG00000228265.4	lincRNA	expressed
ENSG00000258926.1	antisense	expressed
ENSG00000136697.11	protein_coding	non-expressed
ENSG00000214282.3	processed_pseudogene	expressed
ENSG00000219361.1	processed_pseudogene	non-expressed
ENSG00000204837.3	unprocessed_pseudogene	expressed
ENSG00000132622.9	protein_coding	expressed
ENSG00000243220.1	antisense	non-expressed
ENSG00000236885.1	lincRNA	non-expressed
ENSG00000114737.14	protein_coding	expressed
ENSG00000135749.17	protein_coding	expressed
ENSG00000261468.1	sense_overlapping	expressed
ENSG00000130427.2	protein_coding	expressed
ENSG00000231628.1	antisense	expressed
ENSG00000189319.12	protein_coding	expressed
ENSG00000251257.2	antisense	expressed
ENSG00000155229.19	protein_coding	expressed
ENSG00000165409.14	protein_coding	expressed
ENSG00000188869.11	protein_coding	expressed
ENSG00000201179.1	snRNA	non-expressed
ENSG00000235203.2	unprocessed_pseudogene	non-expressed
ENSG00000279319.1	TEC	expressed
ENSG00000131378.12	protein_coding	expressed
ENSG00000231963.1	antisense	non-expressed
ENSG00000227186.1	antisense	non-expressed
ENSG00000254070.1	processed_pseudogene	non-expressed
ENSG00000158485.9	protein_coding	expressed
ENSG00000229192.5	lincRNA	non-expressed
ENSG00000274420.1	misc_RNA	non-expressed
ENSG00000224411.3	processed_pseudogene	expressed
ENSG00000266304.1	lincRNA	expressed
ENSG00000225397.1	processed_pseudogene	non-expressed
ENSG00000226360.5	processed_pseudogene	expressed
ENSG00000267301.1	processed_pseudogene	non-expressed
ENSG00000226609.1	antisense	expressed
ENSG00000217539.2	processed_pseudogene	non-expressed
ENSG00000233996.1	processed_pseudogene	expressed
ENSG00000269191.1	antisense	expressed
ENSG00000144935.13	protein_coding	expressed
ENSG00000184659.5	protein_coding	expressed
ENSG00000251401.2	processed_pseudogene	non-expressed
ENSG00000225807.1	lincRNA	non-expressed
ENSG00000227513.1	processed_pseudogene	non-expressed
ENSG00000213750.4	processed_pseudogene	non-expressed
ENSG00000239659.2	processed_pseudogene	non-expressed
ENSG00000241693.2	misc_RNA	non-expressed
ENSG00000278703.1	lincRNA	expressed
ENSG00000109133.11	protein_coding	expressed
ENSG00000138028.13	protein_coding	expressed
ENSG00000075420.11	protein_coding	expressed
ENSG00000169509.5	protein_coding	non-expressed
ENSG00000221725.1	snRNA	non-expressed
ENSG00000249045.1	unprocessed_pseudogene	non-expressed
ENSG00000271173.1	processed_pseudogene	non-expressed
ENSG00000257150.2	transcribed_processed_pseudogene	expressed
ENSG00000125089.15	protein_coding	expressed
ENSG00000242607.1	processed_pseudogene	expressed
ENSG00000256343.6	lincRNA	non-expressed
ENSG00000275510.1	miRNA	non-expressed
ENSG00000271468.1	processed_pseudogene	non-expressed
ENSG00000266922.1	sense_intronic	expressed
ENSG00000254076.1	processed_pseudogene	non-expressed
ENSG00000252218.1	scaRNA	non-expressed
ENSG00000171612.6	protein_coding	expressed
ENSG00000231341.1	processed_pseudogene	non-expressed
ENSG00000228569.1	lincRNA	expressed
ENSG00000198106.8	lincRNA	expressed
ENSG00000240800.1	transcribed_unprocessed_pseudogene	expressed
ENSG00000166845.12	protein_coding	expressed
ENSG00000200530.1	snoRNA	non-expressed
ENSG00000123999.4	protein_coding	expressed
ENSG00000277468.1	misc_RNA	non-expressed
ENSG00000176922.3	protein_coding	non-expressed
ENSG00000221910.2	protein_coding	non-expressed
ENSG00000260866.1	unprocessed_pseudogene	non-expressed
ENSG00000215895.4	processed_pseudogene	expressed
ENSG00000221354.1	miRNA	non-expressed
ENSG00000100288.18	protein_coding	expressed
ENSG00000251286.2	processed_pseudogene	non-expressed
ENSG00000145908.11	protein_coding	expressed
ENSG00000234848.1	antisense	expressed
ENSG00000275992.1	misc_RNA	non-expressed
ENSG00000146122.15	protein_coding	expressed
ENSG00000163297.15	protein_coding	expressed
ENSG00000254531.1	lincRNA	expressed
ENSG00000253671.1	processed_transcript	expressed
ENSG00000269392.1	antisense	expressed
ENSG00000256197.1	sense_intronic	non-expressed
ENSG00000214835.3	processed_pseudogene	non-expressed
ENSG00000260086.2	lincRNA	expressed
ENSG00000279685.2	sense_intronic	expressed
ENSG00000244278.1	lincRNA	non-expressed
ENSG00000279656.1	TEC	expressed
ENSG00000198983.1	miRNA	non-expressed
ENSG00000171481.3	protein_coding	non-expressed
ENSG00000115523.15	protein_coding	expressed
ENSG00000279786.1	TEC	expressed
ENSG00000132204.12	lincRNA	expressed
ENSG00000257259.1	lincRNA	non-expressed
ENSG00000235040.1	unprocessed_pseudogene	non-expressed
ENSG00000240591.1	antisense	expressed
ENSG00000112576.11	protein_coding	expressed
ENSG00000082068.7	protein_coding	expressed
ENSG00000240993.3	misc_RNA	non-expressed
ENSG00000274685.1	lincRNA	non-expressed
ENSG00000206077.9	protein_coding	expressed
ENSG00000226533.1	antisense	non-expressed
ENSG00000104765.13	protein_coding	expressed
ENSG00000259950.1	processed_pseudogene	non-expressed
ENSG00000230304.1	processed_pseudogene	non-expressed
ENSG00000266276.2	miRNA	non-expressed
ENSG00000171671.6	antisense	non-expressed
ENSG00000259604.4	lincRNA	expressed
ENSG00000265043.1	lincRNA	non-expressed
ENSG00000226964.1	processed_pseudogene	expressed
ENSG00000063015.18	protein_coding	expressed
ENSG00000140612.12	protein_coding	expressed
ENSG00000227800.1	IG_D_gene	non-expressed
ENSG00000163482.10	protein_coding	expressed
ENSG00000171401.13	protein_coding	expressed
ENSG00000242668.3	misc_RNA	non-expressed
ENSG00000224914.2	lincRNA	expressed
ENSG00000273117.1	lincRNA	expressed
ENSG00000099715.13	protein_coding	non-expressed
ENSG00000224530.1	processed_pseudogene	non-expressed
ENSG00000263776.1	snoRNA	non-expressed
ENSG00000279174.1	TEC	expressed
ENSG00000277490.1	processed_pseudogene	non-expressed
ENSG00000125845.6	protein_coding	expressed
ENSG00000272909.1	antisense	expressed
ENSG00000236648.1	lincRNA	non-expressed
ENSG00000280953.1	lincRNA	expressed
ENSG00000271187.1	processed_pseudogene	non-expressed
ENSG00000252091.1	snRNA	non-expressed
ENSG00000278946.1	antisense	non-expressed
ENSG00000200817.1	snRNA	non-expressed
ENSG00000212378.1	snoRNA	non-expressed
ENSG00000230542.4	lincRNA	non-expressed
ENSG00000272953.1	lincRNA	expressed
ENSG00000233887.1	processed_pseudogene	non-expressed
ENSG00000202398.1	snRNA	non-expressed
ENSG00000206638.1	snRNA	non-expressed
ENSG00000227775.3	transcribed_processed_pseudogene	expressed
ENSG00000087274.15	protein_coding	expressed
ENSG00000162704.14	protein_coding	expressed
ENSG00000249501.1	unprocessed_pseudogene	non-expressed
ENSG00000228392.1	lincRNA	non-expressed
ENSG00000205944.10	protein_coding	non-expressed
ENSG00000183318.10	protein_coding	non-expressed
ENSG00000051180.15	protein_coding	expressed
ENSG00000201218.1	misc_RNA	non-expressed
ENSG00000269243.1	antisense	expressed
ENSG00000258780.1	unprocessed_pseudogene	non-expressed
ENSG00000225559.1	lincRNA	non-expressed
ENSG00000216206.1	miRNA	non-expressed
ENSG00000128564.6	protein_coding	expressed
ENSG00000223907.1	lincRNA	expressed
ENSG00000276513.1	miRNA	non-expressed
ENSG00000236511.1	lincRNA	non-expressed
ENSG00000237129.1	processed_pseudogene	non-expressed
ENSG00000239809.1	processed_pseudogene	non-expressed
ENSG00000270075.1	antisense	non-expressed
ENSG00000274584.1	unprocessed_pseudogene	expressed
ENSG00000136158.9	protein_coding	expressed
ENSG00000199065.2	miRNA	non-expressed
ENSG00000223244.1	miRNA	non-expressed
ENSG00000142867.11	protein_coding	expressed
ENSG00000261813.2	processed_pseudogene	non-expressed
ENSG00000116830.10	protein_coding	expressed
ENSG00000253561.1	lincRNA	non-expressed
ENSG00000267000.1	antisense	non-expressed
ENSG00000278586.1	processed_pseudogene	non-expressed
ENSG00000230231.1	unprocessed_pseudogene	non-expressed
ENSG00000272182.1	antisense	expressed
ENSG00000176142.11	protein_coding	expressed
ENSG00000243633.3	misc_RNA	non-expressed
ENSG00000255120.4	antisense	expressed
ENSG00000186417.12	protein_coding	expressed
ENSG00000255124.1	lincRNA	non-expressed
ENSG00000229067.1	processed_pseudogene	non-expressed
ENSG00000248564.1	processed_pseudogene	non-expressed
ENSG00000165555.8	protein_coding	expressed
ENSG00000259579.1	lincRNA	non-expressed
ENSG00000261542.1	lincRNA	expressed
ENSG00000227602.1	sense_intronic	non-expressed
ENSG00000225331.1	lincRNA	expressed
ENSG00000233884.1	antisense	non-expressed
ENSG00000240423.1	lincRNA	expressed
ENSG00000222205.1	rRNA	non-expressed
ENSG00000233220.3	lincRNA	expressed
ENSG00000143125.5	protein_coding	expressed
ENSG00000260276.2	antisense	expressed
ENSG00000220553.1	processed_pseudogene	non-expressed
ENSG00000257766.1	antisense	non-expressed
ENSG00000221385.1	miRNA	expressed
ENSG00000248333.6	protein_coding	expressed
ENSG00000112559.12	protein_coding	expressed
ENSG00000235526.1	antisense	non-expressed
ENSG00000250071.1	processed_pseudogene	non-expressed
ENSG00000277854.1	miRNA	non-expressed
ENSG00000207138.1	snRNA	non-expressed
ENSG00000143493.11	protein_coding	expressed
ENSG00000129910.6	protein_coding	expressed
ENSG00000182873.5	antisense	expressed
ENSG00000145604.14	protein_coding	expressed
ENSG00000182901.14	protein_coding	expressed
ENSG00000253267.4	antisense	non-expressed
ENSG00000207518.1	snRNA	non-expressed
ENSG00000186788.11	transcribed_unprocessed_pseudogene	non-expressed
ENSG00000230661.1	processed_pseudogene	non-expressed
ENSG00000225972.1	unprocessed_pseudogene	expressed
ENSG00000266127.1	processed_pseudogene	non-expressed
ENSG00000235369.1	processed_pseudogene	expressed
ENSG00000264765.1	lincRNA	non-expressed
ENSG00000266538.1	lincRNA	expressed
ENSG00000253497.1	IG_V_pseudogene	expressed
ENSG00000226014.1	processed_pseudogene	non-expressed
ENSG00000259318.1	processed_pseudogene	expressed
ENSG00000255116.2	processed_pseudogene	non-expressed
ENSG00000275121.1	processed_pseudogene	non-expressed
ENSG00000223442.1	antisense	expressed
ENSG00000243195.1	processed_pseudogene	non-expressed
ENSG00000185842.13	protein_coding	expressed
ENSG00000265428.1	processed_pseudogene	non-expressed
ENSG00000174442.10	protein_coding	expressed
ENSG00000203812.2	protein_coding	non-expressed
ENSG00000266978.1	antisense	non-expressed
ENSG00000229208.1	unprocessed_pseudogene	non-expressed
ENSG00000257588.1	antisense	expressed
ENSG00000260601.1	sense_intronic	non-expressed
ENSG00000280298.1	protein_coding	non-expressed
ENSG00000221602.1	miRNA	non-expressed
ENSG00000268447.4	protein_coding	non-expressed
ENSG00000162783.10	protein_coding	expressed
ENSG00000126106.12	protein_coding	expressed
ENSG00000254901.6	protein_coding	expressed
ENSG00000268388.4	lincRNA	expressed
ENSG00000274210.1	snRNA	expressed
ENSG00000279390.1	TEC	expressed
ENSG00000177551.5	protein_coding	expressed
ENSG00000184863.9	protein_coding	expressed
ENSG00000138069.15	protein_coding	expressed
ENSG00000254361.1	lincRNA	non-expressed
ENSG00000280927.1	antisense	expressed
ENSG00000058272.14	protein_coding	expressed
ENSG00000160460.14	protein_coding	expressed
ENSG00000253559.1	antisense	expressed
ENSG00000141753.6	protein_coding	expressed
ENSG00000278107.1	lincRNA	expressed
ENSG00000127528.5	protein_coding	expressed
ENSG00000236108.1	processed_pseudogene	non-expressed
ENSG00000277144.1	lincRNA	expressed
ENSG00000255583.2	transcribed_unprocessed_pseudogene	non-expressed
ENSG00000253696.2	lincRNA	expressed
ENSG00000200673.1	misc_RNA	non-expressed
ENSG00000174021.9	protein_coding	expressed
ENSG00000234579.1	antisense	non-expressed
ENSG00000275690.1	miRNA	non-expressed
ENSG00000236358.1	antisense	expressed
ENSG00000280607.1	processed_transcript	non-expressed
ENSG00000248984.1	antisense	non-expressed
ENSG00000242329.1	processed_pseudogene	non-expressed
ENSG00000181404.15	protein_coding	expressed
ENSG00000119812.17	protein_coding	expressed
ENSG00000249807.1	lincRNA	non-expressed
ENSG00000260799.1	processed_pseudogene	non-expressed
ENSG00000100258.16	protein_coding	expressed
ENSG00000185668.6	protein_coding	expressed
ENSG00000257139.1	lincRNA	non-expressed
ENSG00000075073.13	protein_coding	expressed
ENSG00000260146.1	processed_pseudogene	non-expressed
ENSG00000198393.6	protein_coding	expressed
ENSG00000231346.4	lincRNA	expressed
ENSG00000215023.2	antisense	expressed
ENSG00000232864.1	processed_pseudogene	non-expressed
ENSG00000281190.1	miRNA	non-expressed
ENSG00000125967.15	protein_coding	expressed
ENSG00000277497.1	miRNA	non-expressed
ENSG00000267295.1	unprocessed_pseudogene	non-expressed
ENSG00000232187.1	processed_pseudogene	expressed
ENSG00000278908.1	TEC	expressed
ENSG00000280132.1	TEC	expressed
ENSG00000258104.1	processed_pseudogene	non-expressed
ENSG00000206739.1	misc_RNA	expressed
ENSG00000229999.5	antisense	non-expressed
ENSG00000171574.16	protein_coding	expressed
ENSG00000278008.1	processed_pseudogene	non-expressed
ENSG00000176281.4	protein_coding	non-expressed
ENSG00000225401.2	transcribed_processed_pseudogene	non-expressed
ENSG00000188859.6	protein_coding	expressed
ENSG00000109255.10	protein_coding	expressed
ENSG00000104946.9	protein_coding	expressed
ENSG00000277302.1	miRNA	non-expressed
ENSG00000233581.1	antisense	non-expressed
ENSG00000143603.17	protein_coding	expressed
ENSG00000163421.7	protein_coding	expressed
ENSG00000232979.1	processed_pseudogene	non-expressed
ENSG00000254792.1	processed_pseudogene	non-expressed
ENSG00000184209.14	protein_coding	expressed
ENSG00000136541.13	protein_coding	expressed
ENSG00000184281.13	protein_coding	expressed
ENSG00000199172.2	miRNA	expressed
ENSG00000281641.1	lincRNA	expressed
ENSG00000274023.1	sense_overlapping	non-expressed
ENSG00000249655.1	antisense	expressed
ENSG00000280318.1	TEC	non-expressed
ENSG00000253692.3	IG_C_pseudogene	expressed
ENSG00000142677.3	protein_coding	expressed
ENSG00000275174.1	snRNA	non-expressed
ENSG00000251725.1	miRNA	non-expressed
ENSG00000146223.13	protein_coding	expressed
ENSG00000248971.2	processed_pseudogene	expressed
ENSG00000260042.1	lincRNA	non-expressed
ENSG00000249927.1	processed_pseudogene	non-expressed
ENSG00000251275.1	unprocessed_pseudogene	non-expressed
ENSG00000244024.1	processed_pseudogene	non-expressed
ENSG00000236595.1	processed_pseudogene	non-expressed
ENSG00000279616.1	TEC	non-expressed
ENSG00000239718.1	antisense	non-expressed
ENSG00000251741.1	snRNA	non-expressed
ENSG00000100276.9	protein_coding	expressed
ENSG00000124782.18	protein_coding	expressed
ENSG00000151962.6	protein_coding	expressed
ENSG00000197866.3	unprocessed_pseudogene	non-expressed
ENSG00000168802.11	protein_coding	expressed
ENSG00000237235.2	TR_D_gene	non-expressed
ENSG00000007384.14	protein_coding	expressed
ENSG00000230123.1	unprocessed_pseudogene	non-expressed
ENSG00000232912.4	antisense	expressed
ENSG00000243772.5	protein_coding	expressed
ENSG00000115239.20	protein_coding	expressed
ENSG00000227212.3	processed_pseudogene	expressed
ENSG00000180626.9	protein_coding	expressed
ENSG00000248493.1	processed_pseudogene	non-expressed
ENSG00000240478.1	lincRNA	non-expressed
ENSG00000251078.1	processed_pseudogene	non-expressed
ENSG00000257890.1	lincRNA	non-expressed
ENSG00000258924.4	processed_transcript	non-expressed
ENSG00000207874.1	miRNA	non-expressed
ENSG00000151882.10	protein_coding	expressed
ENSG00000278479.1	miRNA	non-expressed
ENSG00000207180.1	snRNA	non-expressed
ENSG00000172179.10	protein_coding	expressed
ENSG00000256774.1	processed_pseudogene	non-expressed
ENSG00000143196.4	protein_coding	expressed
ENSG00000250043.1	lincRNA	non-expressed
ENSG00000207816.1	miRNA	non-expressed
ENSG00000267436.1	antisense	non-expressed
ENSG00000250166.2	lincRNA	non-expressed
ENSG00000267203.1	processed_pseudogene	expressed
ENSG00000281600.1	miRNA	non-expressed
ENSG00000267122.1	antisense	expressed
ENSG00000275994.1	snoRNA	non-expressed
ENSG00000198729.4	protein_coding	expressed
ENSG00000248690.5	antisense	expressed
ENSG00000279182.1	antisense	expressed
ENSG00000163273.3	protein_coding	expressed
ENSG00000200213.1	snRNA	non-expressed
ENSG00000232350.1	unprocessed_pseudogene	non-expressed
ENSG00000221469.1	miRNA	non-expressed
ENSG00000213822.6	protein_coding	non-expressed
ENSG00000279107.1	TEC	non-expressed
ENSG00000273180.1	lincRNA	non-expressed
ENSG00000272023.1	lincRNA	non-expressed
ENSG00000253685.1	unprocessed_pseudogene	non-expressed
ENSG00000199260.1	snRNA	non-expressed
ENSG00000180720.7	protein_coding	expressed
ENSG00000248191.1	processed_pseudogene	non-expressed
ENSG00000240373.1	antisense	expressed
ENSG00000180525.11	protein_coding	expressed
ENSG00000217159.2	processed_pseudogene	expressed
ENSG00000223275.1	miRNA	non-expressed
ENSG00000221633.2	snoRNA	non-expressed
ENSG00000281389.1	miRNA	non-expressed
ENSG00000249539.1	processed_pseudogene	non-expressed
ENSG00000131100.11	protein_coding	expressed
ENSG00000255171.4	lincRNA	non-expressed
ENSG00000066557.5	protein_coding	expressed
ENSG00000157064.9	protein_coding	expressed
ENSG00000225328.1	antisense	non-expressed
ENSG00000279377.1	TEC	expressed
ENSG00000258369.1	processed_pseudogene	non-expressed
ENSG00000147687.15	protein_coding	expressed
ENSG00000242924.1	lincRNA	non-expressed
ENSG00000206977.1	snoRNA	non-expressed
ENSG00000260563.3	lincRNA	expressed
ENSG00000263628.1	miRNA	non-expressed
ENSG00000186815.11	protein_coding	expressed
ENSG00000134240.10	protein_coding	expressed
ENSG00000269692.1	processed_pseudogene	non-expressed
ENSG00000226337.3	lincRNA	non-expressed
ENSG00000271088.1	processed_pseudogene	non-expressed
ENSG00000166266.12	protein_coding	expressed
ENSG00000225381.2	processed_pseudogene	non-expressed
ENSG00000159377.9	protein_coding	expressed
ENSG00000249312.1	processed_pseudogene	non-expressed
ENSG00000188372.13	protein_coding	expressed
ENSG00000230578.3	transcribed_unprocessed_pseudogene	non-expressed
ENSG00000227244.2	lincRNA	non-expressed
ENSG00000274363.1	lincRNA	expressed
ENSG00000234929.1	lincRNA	expressed
ENSG00000250594.2	processed_pseudogene	non-expressed
ENSG00000070729.12	protein_coding	expressed
ENSG00000115295.18	protein_coding	expressed
ENSG00000243352.3	misc_RNA	non-expressed
ENSG00000235264.1	processed_pseudogene	non-expressed
ENSG00000254342.1	processed_pseudogene	non-expressed
ENSG00000198920.8	protein_coding	expressed
ENSG00000202150.1	snRNA	non-expressed
ENSG00000244342.4	lincRNA	non-expressed
ENSG00000259149.1	lincRNA	non-expressed
ENSG00000212259.1	snRNA	non-expressed
ENSG00000215548.2	unprocessed_pseudogene	expressed
ENSG00000065328.15	protein_coding	expressed
ENSG00000222004.6	lincRNA	non-expressed
ENSG00000161091.11	protein_coding	expressed
ENSG00000263537.2	misc_RNA	non-expressed
ENSG00000238190.1	processed_pseudogene	non-expressed
ENSG00000223377.1	unprocessed_pseudogene	non-expressed
ENSG00000105248.14	protein_coding	expressed
ENSG00000146918.18	protein_coding	expressed
ENSG00000270826.1	processed_pseudogene	non-expressed
ENSG00000188801.9	processed_pseudogene	non-expressed
ENSG00000272109.1	antisense	expressed
ENSG00000242266.3	misc_RNA	non-expressed
ENSG00000248672.4	protein_coding	non-expressed
ENSG00000264007.1	sense_intronic	non-expressed
ENSG00000262500.1	processed_pseudogene	non-expressed
ENSG00000112394.15	protein_coding	expressed
ENSG00000279373.1	TEC	expressed
ENSG00000274150.1	unprocessed_pseudogene	non-expressed
ENSG00000255734.1	processed_pseudogene	non-expressed
ENSG00000260316.2	sense_intronic	expressed
ENSG00000186868.14	protein_coding	expressed
ENSG00000201713.1	rRNA	non-expressed
ENSG00000231046.1	antisense	non-expressed
ENSG00000280010.1	TEC	expressed
ENSG00000130312.5	protein_coding	expressed
ENSG00000223547.8	protein_coding	expressed
ENSG00000200377.1	snoRNA	non-expressed
ENSG00000258954.1	lincRNA	non-expressed
ENSG00000176438.11	protein_coding	expressed
ENSG00000174473.14	protein_coding	expressed
ENSG00000125818.16	protein_coding	expressed
ENSG00000223198.1	snRNA	expressed
ENSG00000104814.11	protein_coding	expressed
ENSG00000170590.7	lincRNA	non-expressed
ENSG00000108479.10	protein_coding	expressed
ENSG00000104870.11	protein_coding	expressed
ENSG00000181016.8	protein_coding	expressed
ENSG00000141034.8	protein_coding	expressed
ENSG00000277288.2	protein_coding	expressed
ENSG00000223403.3	lincRNA	expressed
ENSG00000253266.1	lincRNA	expressed
ENSG00000256092.2	lincRNA	expressed
ENSG00000212100.2	miRNA	non-expressed
ENSG00000239408.1	processed_pseudogene	non-expressed
ENSG00000268605.1	sense_intronic	non-expressed
ENSG00000268970.1	sense_intronic	expressed
ENSG00000245958.5	transcribed_unprocessed_pseudogene	expressed
ENSG00000212133.1	snRNA	non-expressed
ENSG00000232120.1	antisense	non-expressed
ENSG00000066739.10	protein_coding	expressed
ENSG00000244259.1	processed_pseudogene	non-expressed
ENSG00000236267.1	antisense	non-expressed
ENSG00000232537.1	lincRNA	non-expressed
ENSG00000181541.5	protein_coding	expressed
ENSG00000278531.1	unprocessed_pseudogene	non-expressed
ENSG00000264906.1	miRNA	non-expressed
ENSG00000213523.8	protein_coding	expressed
ENSG00000260662.2	processed_pseudogene	non-expressed
ENSG00000221471.1	miRNA	non-expressed
ENSG00000279410.1	TEC	non-expressed
ENSG00000200702.1	misc_RNA	non-expressed
ENSG00000245750.6	lincRNA	expressed
ENSG00000224351.2	processed_pseudogene	non-expressed
ENSG00000124493.12	protein_coding	expressed
ENSG00000249209.2	protein_coding	non-expressed
ENSG00000243063.1	IG_V_gene	expressed
ENSG00000231166.2	processed_pseudogene	non-expressed
ENSG00000249231.6	lincRNA	expressed
ENSG00000206712.1	snRNA	expressed
ENSG00000224813.2	transcribed_unprocessed_pseudogene	non-expressed
ENSG00000130707.16	protein_coding	expressed
ENSG00000261522.4	transcribed_unprocessed_pseudogene	expressed
ENSG00000227098.1	lincRNA	non-expressed
ENSG00000254987.1	lincRNA	expressed
ENSG00000210176.1	Mt_tRNA	non-expressed
ENSG00000259915.2	lincRNA	expressed
ENSG00000253540.4	transcribed_unprocessed_pseudogene	expressed
ENSG00000148908.13	protein_coding	expressed
ENSG00000271290.1	processed_pseudogene	non-expressed
ENSG00000276168.1	misc_RNA	non-expressed
ENSG00000259036.1	antisense	non-expressed
ENSG00000221421.1	miRNA	non-expressed
ENSG00000162692.9	protein_coding	expressed
ENSG00000170379.18	protein_coding	expressed
ENSG00000254175.1	IG_V_pseudogene	non-expressed
ENSG00000215802.3	transcribed_processed_pseudogene	non-expressed
ENSG00000244703.3	unprocessed_pseudogene	non-expressed
ENSG00000274385.1	snRNA	non-expressed
ENSG00000112715.19	protein_coding	expressed
ENSG00000096996.14	protein_coding	expressed
ENSG00000021355.11	protein_coding	expressed
ENSG00000230099.2	TR_V_gene	expressed
ENSG00000249406.1	lincRNA	non-expressed
ENSG00000141098.11	protein_coding	expressed
ENSG00000199620.1	rRNA	non-expressed
ENSG00000272282.1	lincRNA	expressed
ENSG00000182511.10	protein_coding	expressed
ENSG00000258892.1	processed_transcript	non-expressed
ENSG00000250896.1	processed_pseudogene	expressed
ENSG00000237705.1	antisense	expressed
ENSG00000216020.2	miRNA	non-expressed
ENSG00000268651.2	protein_coding	non-expressed
ENSG00000250492.1	processed_pseudogene	expressed
ENSG00000227971.1	processed_pseudogene	non-expressed
ENSG00000162374.15	protein_coding	expressed
ENSG00000147081.13	protein_coding	non-expressed
ENSG00000267253.1	processed_pseudogene	expressed
ENSG00000264251.2	misc_RNA	non-expressed
ENSG00000201178.1	misc_RNA	non-expressed
ENSG00000280861.1	miRNA	non-expressed
ENSG00000280021.1	polymorphic_pseudogene	non-expressed
ENSG00000139970.15	protein_coding	expressed
ENSG00000105427.8	protein_coding	expressed
ENSG00000204653.8	protein_coding	expressed
ENSG00000244642.3	misc_RNA	non-expressed
ENSG00000204983.11	protein_coding	expressed
ENSG00000255054.3	protein_coding	non-expressed
ENSG00000222276.1	snRNA	non-expressed
ENSG00000151364.14	protein_coding	expressed
ENSG00000206887.1	snRNA	non-expressed
ENSG00000260152.2	processed_pseudogene	non-expressed
ENSG00000143363.14	protein_coding	expressed
ENSG00000118046.13	protein_coding	expressed
ENSG00000240405.4	lincRNA	expressed
ENSG00000257899.1	processed_pseudogene	non-expressed
ENSG00000204949.7	antisense	expressed
ENSG00000277460.1	misc_RNA	non-expressed
ENSG00000254794.1	processed_pseudogene	non-expressed
ENSG00000154856.11	protein_coding	expressed
ENSG00000186174.11	protein_coding	expressed
ENSG00000199698.1	misc_RNA	non-expressed
ENSG00000258028.1	lincRNA	non-expressed
ENSG00000171234.12	protein_coding	expressed
ENSG00000166949.14	protein_coding	expressed
ENSG00000255361.1	processed_pseudogene	non-expressed
ENSG00000085274.14	protein_coding	expressed
ENSG00000259598.1	antisense	non-expressed
ENSG00000227304.3	transcribed_processed_pseudogene	expressed
ENSG00000223265.1	snRNA	non-expressed
ENSG00000199593.1	snoRNA	non-expressed
ENSG00000266595.1	miRNA	non-expressed
ENSG00000115568.14	protein_coding	expressed
ENSG00000261778.1	processed_pseudogene	non-expressed
ENSG00000147421.16	protein_coding	expressed
ENSG00000250983.1	processed_pseudogene	non-expressed
ENSG00000264679.1	miRNA	non-expressed
ENSG00000146618.3	protein_coding	non-expressed
ENSG00000254812.1	antisense	expressed
ENSG00000205593.10	protein_coding	expressed
ENSG00000184110.13	protein_coding	expressed
ENSG00000271848.1	antisense	expressed
ENSG00000280687.1	miRNA	non-expressed
ENSG00000236896.1	antisense	non-expressed
ENSG00000137872.14	protein_coding	expressed
ENSG00000278215.1	processed_pseudogene	non-expressed
ENSG00000270961.1	IG_D_gene	non-expressed
ENSG00000145354.8	protein_coding	expressed
ENSG00000265736.1	miRNA	non-expressed
ENSG00000126337.12	protein_coding	expressed
ENSG00000153266.11	protein_coding	non-expressed
ENSG00000272478.1	antisense	non-expressed
ENSG00000242317.1	lincRNA	expressed
ENSG00000276007.1	sense_intronic	expressed
ENSG00000158526.7	protein_coding	expressed
ENSG00000253844.1	lincRNA	expressed
ENSG00000279099.1	TEC	non-expressed
ENSG00000275265.1	lincRNA	non-expressed
ENSG00000252342.1	rRNA	non-expressed
ENSG00000265777.2	misc_RNA	non-expressed
ENSG00000262899.1	antisense	non-expressed
ENSG00000105997.21	protein_coding	expressed
ENSG00000185837.3	antisense	expressed
ENSG00000137522.16	protein_coding	expressed
ENSG00000234838.3	processed_pseudogene	non-expressed
ENSG00000227217.1	antisense	non-expressed
ENSG00000221551.1	miRNA	non-expressed
ENSG00000253935.1	IG_V_pseudogene	non-expressed
ENSG00000251889.1	snRNA	non-expressed
ENSG00000257831.1	antisense	expressed
ENSG00000139209.14	protein_coding	expressed
ENSG00000248870.1	lincRNA	non-expressed
ENSG00000261760.5	lincRNA	non-expressed
ENSG00000152952.10	protein_coding	expressed
ENSG00000270456.1	processed_pseudogene	non-expressed
ENSG00000076344.14	protein_coding	expressed
ENSG00000206585.1	snRNA	non-expressed
ENSG00000272092.1	lincRNA	expressed
ENSG00000133863.5	protein_coding	expressed
ENSG00000137941.15	protein_coding	expressed
ENSG00000165553.4	protein_coding	expressed
ENSG00000276092.1	sense_intronic	non-expressed
ENSG00000146232.13	protein_coding	expressed
ENSG00000233236.1	lincRNA	non-expressed
ENSG00000165588.15	protein_coding	non-expressed
ENSG00000087053.17	protein_coding	expressed
ENSG00000250946.2	unprocessed_pseudogene	non-expressed
ENSG00000236709.1	sense_intronic	non-expressed
ENSG00000168894.8	protein_coding	expressed
ENSG00000267106.4	processed_transcript	expressed
ENSG00000251087.3	unprocessed_pseudogene	expressed
ENSG00000165029.14	protein_coding	expressed
ENSG00000248929.1	processed_pseudogene	non-expressed
ENSG00000243704.3	misc_RNA	non-expressed
ENSG00000198284.8	transcribed_processed_pseudogene	non-expressed
ENSG00000250735.4	lincRNA	non-expressed
ENSG00000268922.1	processed_pseudogene	non-expressed
ENSG00000274010.1	processed_pseudogene	non-expressed
ENSG00000277880.1	TR_V_gene	non-expressed
ENSG00000265357.1	miRNA	non-expressed
ENSG00000255139.1	antisense	expressed
ENSG00000235503.2	antisense	non-expressed
ENSG00000158258.14	protein_coding	expressed
ENSG00000165997.4	protein_coding	expressed
ENSG00000258553.4	antisense	non-expressed
ENSG00000239354.1	processed_pseudogene	non-expressed
ENSG00000213140.3	processed_pseudogene	expressed
ENSG00000241269.1	antisense	expressed
ENSG00000203620.2	lincRNA	non-expressed
ENSG00000229951.4	antisense	expressed
ENSG00000185418.14	protein_coding	expressed
ENSG00000157992.11	protein_coding	expressed
ENSG00000200525.1	snRNA	non-expressed
ENSG00000007350.15	protein_coding	expressed
ENSG00000234015.1	lincRNA	non-expressed
ENSG00000251306.1	processed_pseudogene	non-expressed
ENSG00000279012.1	polymorphic_pseudogene	non-expressed
ENSG00000255394.4	lincRNA	non-expressed
ENSG00000266176.1	lincRNA	expressed
ENSG00000217377.1	processed_pseudogene	non-expressed
ENSG00000227139.1	lincRNA	non-expressed
ENSG00000225582.1	lincRNA	non-expressed
ENSG00000137166.13	protein_coding	expressed
ENSG00000228004.1	processed_pseudogene	non-expressed
ENSG00000251369.7	protein_coding	expressed
ENSG00000261320.1	lincRNA	non-expressed
ENSG00000143353.10	protein_coding	expressed
ENSG00000265681.5	protein_coding	expressed
ENSG00000254002.1	lincRNA	non-expressed
ENSG00000117362.11	protein_coding	expressed
ENSG00000202270.1	snoRNA	non-expressed
ENSG00000263381.1	miRNA	non-expressed
ENSG00000263594.1	lincRNA	non-expressed
ENSG00000130158.12	protein_coding	expressed
ENSG00000275124.1	miRNA	non-expressed
ENSG00000276029.1	miRNA	non-expressed
ENSG00000211691.2	TR_J_gene	non-expressed
ENSG00000252943.1	snRNA	non-expressed
ENSG00000214883.4	unprocessed_pseudogene	non-expressed
ENSG00000252768.1	snRNA	expressed
ENSG00000201554.1	misc_RNA	non-expressed
ENSG00000130561.15	protein_coding	expressed
ENSG00000249558.1	processed_pseudogene	non-expressed
ENSG00000267205.1	antisense	non-expressed
ENSG00000255349.1	unprocessed_pseudogene	non-expressed
ENSG00000108342.11	protein_coding	expressed
ENSG00000214207.2	processed_pseudogene	expressed
ENSG00000102977.12	protein_coding	expressed
ENSG00000223500.1	processed_pseudogene	non-expressed
ENSG00000100197.19	protein_coding	expressed
ENSG00000204662.2	unprocessed_pseudogene	non-expressed
ENSG00000265137.2	miRNA	non-expressed
ENSG00000132437.16	protein_coding	expressed
ENSG00000226486.1	lincRNA	non-expressed
ENSG00000126214.19	protein_coding	expressed
ENSG00000206503.10	protein_coding	expressed
ENSG00000163606.9	protein_coding	expressed
ENSG00000249156.1	processed_pseudogene	non-expressed
ENSG00000239827.7	transcribed_unprocessed_pseudogene	expressed
ENSG00000232197.1	antisense	non-expressed
ENSG00000249639.1	antisense	non-expressed
ENSG00000239168.1	snRNA	non-expressed
ENSG00000005059.14	protein_coding	expressed
ENSG00000180116.14	protein_coding	non-expressed
ENSG00000238393.1	miRNA	non-expressed
ENSG00000264647.1	antisense	expressed
ENSG00000226801.2	processed_pseudogene	non-expressed
ENSG00000199038.1	miRNA	non-expressed
ENSG00000230289.1	antisense	expressed
ENSG00000147383.9	protein_coding	expressed
ENSG00000229247.2	processed_pseudogene	non-expressed
ENSG00000218536.1	processed_pseudogene	non-expressed
ENSG00000206896.1	snRNA	non-expressed
ENSG00000264484.2	misc_RNA	non-expressed
ENSG00000133475.15	protein_coding	expressed
ENSG00000168374.9	protein_coding	expressed
ENSG00000067225.16	protein_coding	expressed
ENSG00000224812.2	antisense	expressed
ENSG00000239185.1	snRNA	non-expressed
ENSG00000171792.9	protein_coding	expressed
ENSG00000252412.1	misc_RNA	expressed
ENSG00000272510.1	antisense	expressed
ENSG00000197363.8	protein_coding	expressed
ENSG00000221525.1	miRNA	non-expressed
ENSG00000268282.1	processed_pseudogene	non-expressed
ENSG00000247556.5	processed_transcript	expressed
ENSG00000252362.1	snRNA	non-expressed
ENSG00000235518.2	lincRNA	non-expressed
ENSG00000224516.4	antisense	non-expressed
ENSG00000223554.1	lincRNA	non-expressed
ENSG00000234969.1	processed_pseudogene	expressed
ENSG00000234730.1	lincRNA	non-expressed
ENSG00000231113.2	antisense	expressed
ENSG00000223544.1	unprocessed_pseudogene	non-expressed
ENSG00000083454.20	protein_coding	expressed
ENSG00000254172.1	snRNA	non-expressed
ENSG00000277590.1	miRNA	non-expressed
ENSG00000266160.2	misc_RNA	non-expressed
ENSG00000233928.4	lincRNA	non-expressed
ENSG00000201586.1	snRNA	non-expressed
ENSG00000155918.6	protein_coding	expressed
ENSG00000106341.9	protein_coding	non-expressed
ENSG00000250506.5	protein_coding	expressed
ENSG00000258204.1	processed_pseudogene	non-expressed
ENSG00000182963.8	protein_coding	expressed
ENSG00000244456.2	transcribed_unprocessed_pseudogene	non-expressed
ENSG00000274985.1	unprocessed_pseudogene	non-expressed
ENSG00000242320.2	processed_pseudogene	non-expressed
ENSG00000278612.1	miRNA	non-expressed
ENSG00000223488.2	processed_pseudogene	non-expressed
ENSG00000253576.1	antisense	non-expressed
ENSG00000202410.1	misc_RNA	non-expressed
ENSG00000272568.4	antisense	expressed
ENSG00000251371.1	lincRNA	non-expressed
ENSG00000228100.1	lincRNA	non-expressed
ENSG00000235199.1	processed_pseudogene	non-expressed
ENSG00000255163.1	processed_pseudogene	non-expressed
ENSG00000234172.1	lincRNA	non-expressed
ENSG00000238145.2	processed_pseudogene	expressed
ENSG00000270531.1	processed_pseudogene	non-expressed
ENSG00000254529.1	unprocessed_pseudogene	expressed
ENSG00000070669.15	protein_coding	expressed
ENSG00000254174.1	IG_V_pseudogene	expressed
ENSG00000261066.1	lincRNA	non-expressed
ENSG00000253663.1	processed_pseudogene	non-expressed
ENSG00000255257.1	lincRNA	expressed
ENSG00000225003.1	unprocessed_pseudogene	non-expressed
ENSG00000243725.5	protein_coding	expressed
ENSG00000213152.5	processed_pseudogene	expressed
ENSG00000231353.1	unprocessed_pseudogene	non-expressed
ENSG00000229159.1	unprocessed_pseudogene	non-expressed
ENSG00000280581.1	misc_RNA	non-expressed
ENSG00000259255.1	lincRNA	non-expressed
ENSG00000234634.1	lincRNA	non-expressed
ENSG00000226093.1	processed_pseudogene	non-expressed
ENSG00000104731.12	protein_coding	expressed
ENSG00000137574.9	protein_coding	expressed
ENSG00000266952.1	lincRNA	non-expressed
ENSG00000144843.10	protein_coding	expressed
ENSG00000226970.2	processed_pseudogene	non-expressed
ENSG00000215127.6	transcribed_processed_pseudogene	non-expressed
ENSG00000254781.1	processed_pseudogene	non-expressed
ENSG00000185722.15	protein_coding	expressed
ENSG00000265865.1	miRNA	non-expressed
ENSG00000279283.1	TEC	expressed
ENSG00000005001.8	protein_coding	expressed
ENSG00000235352.1	processed_pseudogene	non-expressed
ENSG00000230498.1	antisense	expressed
ENSG00000254469.6	protein_coding	expressed
ENSG00000080709.13	protein_coding	expressed
ENSG00000009694.12	protein_coding	expressed
ENSG00000083457.10	protein_coding	expressed
ENSG00000260528.3	lincRNA	expressed
ENSG00000234861.2	processed_pseudogene	non-expressed
ENSG00000174145.7	protein_coding	expressed
ENSG00000131467.9	protein_coding	expressed
ENSG00000224686.1	processed_pseudogene	non-expressed
ENSG00000256783.1	lincRNA	non-expressed
ENSG00000273653.1	miRNA	non-expressed
ENSG00000280007.1	antisense	expressed
ENSG00000173465.6	protein_coding	expressed
ENSG00000260758.1	lincRNA	non-expressed
ENSG00000164188.7	protein_coding	expressed
ENSG00000102524.10	protein_coding	expressed
ENSG00000227203.3	processed_pseudogene	expressed
ENSG00000225213.2	sense_intronic	expressed
ENSG00000281639.1	miRNA	non-expressed
ENSG00000237171.1	unprocessed_pseudogene	non-expressed
ENSG00000250130.1	processed_pseudogene	expressed
ENSG00000112159.10	protein_coding	expressed
ENSG00000270937.1	lincRNA	non-expressed
ENSG00000221852.4	protein_coding	non-expressed
ENSG00000256238.1	processed_pseudogene	expressed
ENSG00000252157.1	snRNA	non-expressed
ENSG00000262031.1	lincRNA	non-expressed
ENSG00000254842.5	lincRNA	expressed
ENSG00000281420.1	pseudogene	expressed
ENSG00000225822.4	antisense	non-expressed
ENSG00000260187.1	transcribed_processed_pseudogene	non-expressed
ENSG00000015475.17	protein_coding	expressed
ENSG00000157870.13	protein_coding	expressed
ENSG00000184785.5	protein_coding	expressed
ENSG00000096968.11	protein_coding	expressed
ENSG00000253331.1	lincRNA	non-expressed
ENSG00000262248.1	processed_pseudogene	expressed
ENSG00000197462.3	lincRNA	non-expressed
ENSG00000100749.6	protein_coding	expressed
ENSG00000154229.10	protein_coding	expressed
ENSG00000200783.1	misc_RNA	non-expressed
ENSG00000166478.8	protein_coding	expressed
ENSG00000278878.1	lincRNA	non-expressed
ENSG00000258290.1	processed_pseudogene	non-expressed
ENSG00000180340.6	protein_coding	expressed
ENSG00000274933.3	protein_coding	non-expressed
ENSG00000257231.1	processed_pseudogene	non-expressed
ENSG00000263749.1	processed_pseudogene	non-expressed
ENSG00000109270.11	protein_coding	expressed
ENSG00000268050.2	antisense	non-expressed
ENSG00000236471.1	lincRNA	non-expressed
ENSG00000196468.7	protein_coding	expressed
ENSG00000198643.5	protein_coding	expressed
ENSG00000233593.5	lincRNA	expressed
ENSG00000232429.3	processed_pseudogene	non-expressed
ENSG00000221662.1	miRNA	non-expressed
ENSG00000148843.12	protein_coding	expressed
ENSG00000237190.3	protein_coding	expressed
ENSG00000254734.1	lincRNA	non-expressed
ENSG00000198168.7	protein_coding	expressed
ENSG00000116161.16	protein_coding	expressed
ENSG00000116748.18	protein_coding	expressed
ENSG00000249601.2	lincRNA	non-expressed
ENSG00000242829.1	processed_pseudogene	non-expressed
ENSG00000280135.1	TEC	expressed
ENSG00000277613.1	snRNA	non-expressed
ENSG00000265484.1	lincRNA	non-expressed
ENSG00000242522.1	antisense	non-expressed
ENSG00000249026.2	processed_pseudogene	expressed
ENSG00000269186.1	lincRNA	non-expressed
ENSG00000241550.3	misc_RNA	non-expressed
ENSG00000212383.1	snoRNA	non-expressed
ENSG00000277067.3	lincRNA	non-expressed
ENSG00000259645.1	sense_intronic	expressed
ENSG00000183309.10	protein_coding	expressed
ENSG00000253889.1	IG_V_pseudogene	non-expressed
ENSG00000106245.8	protein_coding	expressed
ENSG00000200170.1	misc_RNA	expressed
ENSG00000175279.20	protein_coding	expressed
ENSG00000216938.3	processed_pseudogene	non-expressed
ENSG00000236468.1	processed_pseudogene	expressed
ENSG00000110107.7	protein_coding	expressed
ENSG00000165591.6	protein_coding	expressed
ENSG00000224765.1	antisense	non-expressed
ENSG00000275413.1	antisense	expressed
ENSG00000259696.2	processed_pseudogene	non-expressed
ENSG00000253808.1	IG_V_pseudogene	non-expressed
ENSG00000168067.10	protein_coding	expressed
ENSG00000167100.13	protein_coding	expressed
ENSG00000251602.5	antisense	expressed
ENSG00000236978.1	processed_pseudogene	non-expressed
ENSG00000145824.11	protein_coding	expressed
ENSG00000102195.8	protein_coding	non-expressed
ENSG00000228084.1	antisense	expressed
ENSG00000276093.1	lincRNA	expressed
ENSG00000248559.1	antisense	expressed
ENSG00000124181.13	protein_coding	expressed
ENSG00000196274.5	misc_RNA	expressed
ENSG00000029364.10	protein_coding	expressed
ENSG00000254931.2	processed_pseudogene	non-expressed
ENSG00000230239.1	lincRNA	non-expressed
ENSG00000213070.3	processed_pseudogene	non-expressed
ENSG00000263220.1	antisense	expressed
ENSG00000121388.5	unprocessed_pseudogene	non-expressed
ENSG00000169062.13	protein_coding	expressed
ENSG00000273450.1	antisense	expressed
ENSG00000207933.2	miRNA	non-expressed
ENSG00000274343.1	processed_pseudogene	non-expressed
ENSG00000233259.4	processed_pseudogene	non-expressed
ENSG00000120253.12	protein_coding	expressed
ENSG00000235089.1	processed_pseudogene	non-expressed
ENSG00000251517.1	lincRNA	expressed
ENSG00000099889.12	protein_coding	expressed
ENSG00000140090.16	protein_coding	expressed
ENSG00000241622.1	processed_pseudogene	expressed
ENSG00000150526.10	protein_coding	non-expressed
ENSG00000278764.1	misc_RNA	non-expressed
ENSG00000106628.9	protein_coding	expressed
ENSG00000259708.1	antisense	non-expressed
ENSG00000272368.2	antisense	expressed
ENSG00000103534.15	protein_coding	expressed
ENSG00000198042.9	protein_coding	expressed
ENSG00000259602.1	antisense	non-expressed
ENSG00000228430.7	lincRNA	non-expressed
ENSG00000239911.2	antisense	expressed
ENSG00000139289.12	protein_coding	expressed
ENSG00000197171.5	unprocessed_pseudogene	non-expressed
ENSG00000231219.1	unprocessed_pseudogene	non-expressed
ENSG00000238088.1	unprocessed_pseudogene	non-expressed
ENSG00000250722.4	protein_coding	expressed
ENSG00000226833.4	antisense	expressed
ENSG00000257042.1	antisense	expressed
ENSG00000239555.3	misc_RNA	non-expressed
ENSG00000072832.13	protein_coding	expressed
ENSG00000197050.9	protein_coding	expressed
ENSG00000267659.4	lincRNA	expressed
ENSG00000263809.1	protein_coding	expressed
ENSG00000279671.1	TEC	non-expressed
ENSG00000280396.1	TEC	non-expressed
ENSG00000177352.9	protein_coding	expressed
ENSG00000273096.1	sense_intronic	expressed
ENSG00000102007.9	protein_coding	expressed
ENSG00000269321.1	antisense	non-expressed
ENSG00000226643.2	lincRNA	non-expressed
ENSG00000231987.1	lincRNA	non-expressed
ENSG00000152784.14	protein_coding	expressed
ENSG00000228700.1	processed_pseudogene	non-expressed
ENSG00000254705.1	antisense	non-expressed
ENSG00000262470.2	transcribed_processed_pseudogene	non-expressed
ENSG00000265975.1	lincRNA	expressed
ENSG00000249722.1	lincRNA	non-expressed
ENSG00000230162.1	unprocessed_pseudogene	non-expressed
ENSG00000176160.8	protein_coding	expressed
ENSG00000223402.1	processed_pseudogene	non-expressed
ENSG00000271532.1	processed_pseudogene	expressed
ENSG00000169139.10	protein_coding	expressed
ENSG00000273170.4	protein_coding	expressed
ENSG00000199158.1	miRNA	non-expressed
ENSG00000232442.1	antisense	expressed
ENSG00000231873.1	lincRNA	expressed
ENSG00000164898.11	protein_coding	expressed
ENSG00000161800.11	protein_coding	expressed
ENSG00000253717.1	lincRNA	non-expressed
ENSG00000200139.1	snRNA	non-expressed
ENSG00000163945.14	protein_coding	expressed
ENSG00000259482.1	antisense	non-expressed
ENSG00000251218.1	lincRNA	non-expressed
ENSG00000159496.13	protein_coding	expressed
ENSG00000233308.1	antisense	expressed
ENSG00000270379.4	protein_coding	expressed
ENSG00000155052.14	protein_coding	non-expressed
ENSG00000171757.14	protein_coding	expressed
ENSG00000222631.3	miRNA	non-expressed
ENSG00000260185.1	antisense	non-expressed
ENSG00000262601.1	lincRNA	expressed
ENSG00000243832.1	lincRNA	non-expressed
ENSG00000273699.1	miRNA	non-expressed
ENSG00000256947.1	antisense	non-expressed
ENSG00000270890.1	processed_pseudogene	expressed
ENSG00000276527.1	lincRNA	non-expressed
ENSG00000225761.1	sense_intronic	non-expressed
ENSG00000102595.17	protein_coding	expressed
ENSG00000259037.1	antisense	non-expressed
ENSG00000134207.13	protein_coding	expressed
ENSG00000230376.1	processed_pseudogene	non-expressed
ENSG00000170214.3	protein_coding	expressed
ENSG00000227361.1	processed_pseudogene	expressed
ENSG00000198723.9	protein_coding	expressed
ENSG00000100316.14	protein_coding	expressed
ENSG00000236184.1	processed_pseudogene	expressed
ENSG00000261191.1	antisense	non-expressed
ENSG00000080007.7	protein_coding	expressed
ENSG00000274934.1	misc_RNA	non-expressed
ENSG00000120868.12	protein_coding	expressed
ENSG00000233817.1	lincRNA	expressed
ENSG00000275656.1	misc_RNA	non-expressed
ENSG00000252133.1	snoRNA	non-expressed
ENSG00000230734.1	processed_pseudogene	expressed
ENSG00000262158.1	unprocessed_pseudogene	non-expressed
ENSG00000234740.1	sense_intronic	expressed
ENSG00000196850.5	protein_coding	expressed
ENSG00000166848.5	protein_coding	expressed
ENSG00000224520.2	processed_pseudogene	expressed
ENSG00000201778.1	misc_RNA	non-expressed
ENSG00000266006.1	miRNA	non-expressed
ENSG00000258781.2	unprocessed_pseudogene	non-expressed
ENSG00000240032.1	antisense	expressed
ENSG00000237609.1	lincRNA	non-expressed
ENSG00000272944.1	antisense	expressed
ENSG00000174485.13	protein_coding	expressed
ENSG00000176232.10	unprocessed_pseudogene	non-expressed
ENSG00000226193.1	antisense	non-expressed
ENSG00000268296.1	lincRNA	non-expressed
ENSG00000272788.1	sense_intronic	expressed
ENSG00000228958.1	processed_pseudogene	non-expressed
ENSG00000239620.1	processed_pseudogene	non-expressed
ENSG00000274631.1	processed_pseudogene	non-expressed
ENSG00000232855.5	lincRNA	expressed
ENSG00000249437.6	protein_coding	expressed
ENSG00000152213.3	protein_coding	expressed
ENSG00000253055.1	rRNA	non-expressed
ENSG00000232545.1	sense_intronic	expressed
ENSG00000266288.1	lincRNA	non-expressed
ENSG00000198825.10	protein_coding	expressed
ENSG00000279123.1	TEC	non-expressed
ENSG00000277662.1	sense_intronic	expressed
ENSG00000223866.1	processed_pseudogene	non-expressed
ENSG00000225572.1	antisense	non-expressed
ENSG00000204344.13	protein_coding	expressed
ENSG00000253441.1	IG_V_pseudogene	expressed
ENSG00000186469.7	protein_coding	expressed
ENSG00000270696.1	antisense	expressed
ENSG00000234224.2	protein_coding	non-expressed
ENSG00000216676.2	processed_pseudogene	non-expressed
ENSG00000212561.1	snRNA	non-expressed
ENSG00000264658.1	miRNA	non-expressed
ENSG00000253956.1	lincRNA	non-expressed
ENSG00000251287.7	protein_coding	expressed
ENSG00000167701.12	protein_coding	expressed
ENSG00000204933.3	unprocessed_pseudogene	non-expressed
ENSG00000268505.1	lincRNA	non-expressed
ENSG00000259268.1	lincRNA	non-expressed
ENSG00000280799.1	unprocessed_pseudogene	non-expressed
ENSG00000276564.1	lincRNA	expressed
ENSG00000264911.1	processed_pseudogene	non-expressed
ENSG00000072135.11	protein_coding	expressed
ENSG00000110321.14	protein_coding	expressed
ENSG00000079739.14	protein_coding	expressed
ENSG00000019991.14	protein_coding	expressed
ENSG00000183668.16	protein_coding	expressed
ENSG00000154146.11	protein_coding	expressed
ENSG00000254973.1	lincRNA	expressed
ENSG00000174123.9	protein_coding	expressed
ENSG00000221074.1	miRNA	non-expressed
ENSG00000214903.4	processed_pseudogene	non-expressed
ENSG00000232627.1	processed_pseudogene	non-expressed
ENSG00000254017.1	IG_C_pseudogene	expressed
ENSG00000126264.8	protein_coding	expressed
ENSG00000214878.2	processed_pseudogene	non-expressed
ENSG00000224809.2	processed_pseudogene	non-expressed
ENSG00000180011.6	protein_coding	expressed
ENSG00000265737.1	antisense	expressed
ENSG00000279054.1	protein_coding	non-expressed
ENSG00000122484.8	protein_coding	expressed
ENSG00000264500.1	miRNA	non-expressed
ENSG00000279106.1	TEC	non-expressed
ENSG00000200040.1	misc_RNA	non-expressed
ENSG00000241654.1	processed_pseudogene	non-expressed
ENSG00000279604.1	TEC	non-expressed
ENSG00000136059.13	protein_coding	expressed
ENSG00000230484.2	unitary_pseudogene	non-expressed
ENSG00000233262.1	antisense	non-expressed
ENSG00000266203.1	miRNA	non-expressed
ENSG00000248551.1	lincRNA	non-expressed
ENSG00000267137.1	antisense	non-expressed
ENSG00000253526.1	lincRNA	non-expressed
ENSG00000215845.9	protein_coding	expressed
ENSG00000276252.1	miRNA	non-expressed
ENSG00000256011.1	antisense	non-expressed
ENSG00000223273.1	misc_RNA	non-expressed
ENSG00000276056.1	miRNA	non-expressed
ENSG00000178750.2	protein_coding	expressed
ENSG00000235843.1	antisense	non-expressed
ENSG00000258845.1	lincRNA	non-expressed
ENSG00000224781.1	processed_pseudogene	expressed
ENSG00000228056.3	processed_pseudogene	non-expressed
ENSG00000280731.1	miRNA	non-expressed
ENSG00000188153.11	protein_coding	expressed
ENSG00000255776.1	processed_pseudogene	non-expressed
ENSG00000234427.1	lincRNA	non-expressed
ENSG00000279717.1	TEC	expressed
ENSG00000264288.1	miRNA	non-expressed
ENSG00000101470.8	protein_coding	expressed
ENSG00000232671.4	antisense	expressed
ENSG00000177023.2	protein_coding	non-expressed
ENSG00000247595.2	processed_transcript	expressed
ENSG00000220157.4	processed_pseudogene	expressed
ENSG00000270435.1	processed_pseudogene	non-expressed
ENSG00000185825.14	protein_coding	expressed
ENSG00000053501.11	protein_coding	expressed
ENSG00000253768.1	lincRNA	expressed
ENSG00000267653.1	lincRNA	expressed
ENSG00000196248.4	protein_coding	non-expressed
ENSG00000111049.3	protein_coding	non-expressed
ENSG00000204832.8	antisense	expressed
ENSG00000258380.1	antisense	non-expressed
ENSG00000106723.15	protein_coding	expressed
ENSG00000255067.1	sense_intronic	non-expressed
ENSG00000270293.1	processed_pseudogene	non-expressed
ENSG00000140107.10	protein_coding	non-expressed
ENSG00000221065.1	miRNA	non-expressed
ENSG00000116525.12	protein_coding	expressed
ENSG00000206800.1	misc_RNA	non-expressed
ENSG00000220537.1	processed_pseudogene	non-expressed
ENSG00000279200.1	TEC	expressed
ENSG00000254858.8	protein_coding	expressed
ENSG00000200645.1	snRNA	non-expressed
ENSG00000165917.8	protein_coding	expressed
ENSG00000160766.13	transcribed_unprocessed_pseudogene	expressed
ENSG00000199480.1	rRNA	non-expressed
ENSG00000167165.17	protein_coding	expressed
ENSG00000153291.14	protein_coding	expressed
ENSG00000252978.1	misc_RNA	non-expressed
ENSG00000273763.1	processed_pseudogene	expressed
ENSG00000270526.1	processed_pseudogene	non-expressed
ENSG00000265493.1	miRNA	non-expressed
ENSG00000177669.3	protein_coding	expressed
ENSG00000198298.11	protein_coding	expressed
ENSG00000240970.1	processed_pseudogene	expressed
ENSG00000180139.11	antisense	expressed
ENSG00000120471.13	protein_coding	expressed
ENSG00000277127.1	misc_RNA	non-expressed
ENSG00000252854.1	misc_RNA	non-expressed
ENSG00000224537.1	unprocessed_pseudogene	non-expressed
ENSG00000120306.8	protein_coding	expressed
ENSG00000270911.1	processed_pseudogene	non-expressed
ENSG00000167088.9	protein_coding	expressed
ENSG00000204887.4	protein_coding	non-expressed
ENSG00000264693.1	lincRNA	non-expressed
ENSG00000074695.5	protein_coding	expressed
ENSG00000214255.5	processed_pseudogene	non-expressed
ENSG00000092377.12	protein_coding	non-expressed
ENSG00000180767.8	protein_coding	expressed
ENSG00000214176.8	transcribed_unprocessed_pseudogene	expressed
ENSG00000263307.1	antisense	expressed
ENSG00000273295.1	lincRNA	expressed
ENSG00000173093.11	protein_coding	non-expressed
ENSG00000089693.9	protein_coding	expressed
ENSG00000280194.1	TEC	expressed
ENSG00000088970.14	protein_coding	expressed
ENSG00000183876.8	protein_coding	expressed
ENSG00000264779.1	miRNA	non-expressed
ENSG00000252601.1	snoRNA	non-expressed
ENSG00000252357.1	misc_RNA	non-expressed
ENSG00000148925.9	protein_coding	expressed
ENSG00000230476.1	unprocessed_pseudogene	non-expressed
ENSG00000213213.12	protein_coding	expressed
ENSG00000104093.12	protein_coding	expressed
ENSG00000251435.1	processed_pseudogene	non-expressed
ENSG00000225764.1	antisense	expressed
ENSG00000255976.1	processed_pseudogene	non-expressed
ENSG00000280063.1	TEC	expressed
ENSG00000233869.1	processed_pseudogene	non-expressed
ENSG00000264429.1	miRNA	non-expressed
ENSG00000185304.13	protein_coding	expressed
ENSG00000207116.1	snRNA	non-expressed
ENSG00000251035.1	processed_pseudogene	non-expressed
ENSG00000074266.16	protein_coding	expressed
ENSG00000156574.8	protein_coding	expressed
ENSG00000248256.1	antisense	expressed
ENSG00000214702.6	unprocessed_pseudogene	non-expressed
ENSG00000266481.1	miRNA	non-expressed
ENSG00000232949.1	antisense	non-expressed
ENSG00000115233.10	protein_coding	expressed
ENSG00000214290.6	protein_coding	expressed
ENSG00000270661.1	lincRNA	expressed
ENSG00000211866.1	TR_J_gene	non-expressed
ENSG00000239605.7	protein_coding	expressed
ENSG00000259660.2	transcribed_unprocessed_pseudogene	expressed
ENSG00000197838.4	protein_coding	expressed
ENSG00000127946.15	protein_coding	expressed
ENSG00000197576.12	protein_coding	expressed
ENSG00000248533.1	lincRNA	non-expressed
ENSG00000270139.1	lincRNA	non-expressed
ENSG00000271046.1	lincRNA	expressed
ENSG00000053918.14	protein_coding	expressed
ENSG00000226461.3	unprocessed_pseudogene	non-expressed
ENSG00000215183.4	protein_coding	non-expressed
ENSG00000258308.4	lincRNA	non-expressed
ENSG00000089006.15	protein_coding	expressed
ENSG00000234262.1	unprocessed_pseudogene	non-expressed
ENSG00000277939.1	miRNA	non-expressed
ENSG00000200887.1	snRNA	non-expressed
ENSG00000149633.10	protein_coding	expressed
ENSG00000257365.6	protein_coding	expressed
ENSG00000185650.9	protein_coding	expressed
ENSG00000202159.1	snRNA	non-expressed
ENSG00000254741.1	antisense	non-expressed
ENSG00000278393.1	miRNA	non-expressed
ENSG00000221347.1	miRNA	non-expressed
ENSG00000264340.1	antisense	non-expressed
ENSG00000132842.12	protein_coding	expressed
ENSG00000167748.9	protein_coding	expressed
ENSG00000211482.1	miRNA	expressed
ENSG00000224078.11	processed_transcript	expressed
ENSG00000200281.1	snRNA	non-expressed
ENSG00000233061.1	sense_intronic	non-expressed
ENSG00000254568.1	antisense	non-expressed
ENSG00000237941.2	antisense	non-expressed
ENSG00000137807.12	protein_coding	expressed
ENSG00000231566.1	lincRNA	non-expressed
ENSG00000201761.1	snRNA	non-expressed
ENSG00000100302.6	protein_coding	expressed
ENSG00000254066.1	lincRNA	non-expressed
ENSG00000235333.3	transcribed_unprocessed_pseudogene	non-expressed
ENSG00000207475.1	snoRNA	non-expressed
ENSG00000248850.1	processed_pseudogene	non-expressed
ENSG00000143740.13	protein_coding	expressed
ENSG00000274622.2	miRNA	non-expressed
ENSG00000224563.1	antisense	non-expressed
ENSG00000277810.1	miRNA	non-expressed
ENSG00000163046.14	protein_coding	non-expressed
ENSG00000116001.14	protein_coding	expressed
ENSG00000198947.13	protein_coding	expressed
ENSG00000225006.1	lincRNA	non-expressed
ENSG00000275014.1	misc_RNA	non-expressed
ENSG00000229917.2	processed_pseudogene	non-expressed
ENSG00000149218.4	protein_coding	expressed
ENSG00000237702.2	TR_V_gene	expressed
ENSG00000215223.3	processed_pseudogene	non-expressed
ENSG00000226779.1	antisense	non-expressed
ENSG00000218227.3	processed_pseudogene	expressed
ENSG00000008517.15	protein_coding	expressed
ENSG00000260259.1	lincRNA	expressed
ENSG00000272096.2	misc_RNA	non-expressed
ENSG00000233126.3	processed_pseudogene	non-expressed
ENSG00000226771.1	antisense	non-expressed
ENSG00000201113.1	snRNA	non-expressed
ENSG00000221438.1	miRNA	non-expressed
ENSG00000137074.17	protein_coding	expressed
ENSG00000179598.5	protein_coding	expressed
ENSG00000257103.7	protein_coding	expressed
ENSG00000205730.6	protein_coding	expressed
ENSG00000267465.5	lincRNA	non-expressed
ENSG00000240777.2	lincRNA	non-expressed
ENSG00000114853.12	protein_coding	expressed
ENSG00000102003.9	protein_coding	expressed
ENSG00000234497.4	antisense	non-expressed
ENSG00000223878.1	processed_pseudogene	expressed
ENSG00000202269.1	snoRNA	non-expressed
ENSG00000158850.13	protein_coding	expressed
ENSG00000206888.1	snRNA	non-expressed
ENSG00000231305.3	antisense	expressed
ENSG00000215399.2	processed_pseudogene	expressed
ENSG00000255549.2	unprocessed_pseudogene	non-expressed
ENSG00000215149.3	processed_pseudogene	non-expressed
ENSG00000238131.1	lincRNA	non-expressed
ENSG00000279067.1	TEC	non-expressed
ENSG00000196917.5	protein_coding	expressed
ENSG00000204315.3	protein_coding	expressed
ENSG00000223704.1	lincRNA	expressed
ENSG00000233447.1	unprocessed_pseudogene	non-expressed
ENSG00000166509.9	protein_coding	expressed
ENSG00000201638.2	misc_RNA	non-expressed
ENSG00000242659.1	lincRNA	expressed
ENSG00000255690.2	protein_coding	expressed
ENSG00000201492.1	rRNA	expressed
ENSG00000200537.1	misc_RNA	non-expressed
ENSG00000198944.5	protein_coding	expressed
ENSG00000249951.1	lincRNA	non-expressed
ENSG00000258524.1	processed_pseudogene	expressed
ENSG00000135862.5	protein_coding	expressed
ENSG00000275727.1	miRNA	non-expressed
ENSG00000017427.14	protein_coding	expressed
ENSG00000263618.4	lincRNA	expressed
ENSG00000168619.14	protein_coding	non-expressed
ENSG00000278370.1	lincRNA	non-expressed
ENSG00000203858.3	unprocessed_pseudogene	expressed
ENSG00000250242.1	lincRNA	non-expressed
ENSG00000158050.4	protein_coding	expressed
ENSG00000242550.4	protein_coding	expressed
ENSG00000159069.12	protein_coding	expressed
ENSG00000252454.2	miRNA	non-expressed
ENSG00000181395.6	pseudogene	non-expressed
ENSG00000127914.15	protein_coding	expressed
ENSG00000232884.6	lincRNA	expressed
ENSG00000242477.1	processed_pseudogene	expressed
ENSG00000257905.1	processed_pseudogene	expressed
ENSG00000274180.1	protein_coding	expressed
ENSG00000277299.1	antisense	expressed
ENSG00000274222.1	miRNA	non-expressed
ENSG00000171310.9	protein_coding	expressed
ENSG00000235303.1	lincRNA	non-expressed
ENSG00000274770.1	miRNA	non-expressed
ENSG00000269388.1	transcribed_processed_pseudogene	expressed
ENSG00000167526.12	protein_coding	expressed
ENSG00000229965.1	processed_pseudogene	non-expressed
ENSG00000171714.10	protein_coding	expressed
ENSG00000235776.2	processed_pseudogene	expressed
ENSG00000259186.1	processed_pseudogene	non-expressed
ENSG00000204657.3	protein_coding	non-expressed
ENSG00000279297.1	TEC	non-expressed
ENSG00000164331.8	protein_coding	expressed
ENSG00000275833.1	unprocessed_pseudogene	expressed
ENSG00000272692.1	lincRNA	expressed
ENSG00000214067.2	processed_pseudogene	non-expressed
ENSG00000281887.1	protein_coding	non-expressed
ENSG00000228373.2	processed_pseudogene	non-expressed
ENSG00000101310.13	protein_coding	expressed
ENSG00000272798.1	lincRNA	expressed
ENSG00000125107.15	protein_coding	expressed
ENSG00000237682.2	processed_pseudogene	non-expressed
ENSG00000202434.1	snoRNA	non-expressed
ENSG00000153303.15	protein_coding	expressed
ENSG00000251834.1	snRNA	non-expressed
ENSG00000182704.7	protein_coding	expressed
ENSG00000267874.1	sense_intronic	expressed
ENSG00000240309.1	processed_pseudogene	non-expressed
ENSG00000135222.6	protein_coding	non-expressed
ENSG00000158125.8	protein_coding	expressed
ENSG00000101892.10	protein_coding	non-expressed
ENSG00000256025.1	antisense	non-expressed
ENSG00000200274.1	snRNA	non-expressed
ENSG00000162368.12	protein_coding	expressed
ENSG00000275070.1	misc_RNA	expressed
ENSG00000105270.13	protein_coding	expressed
ENSG00000272237.1	snoRNA	non-expressed
ENSG00000268912.1	lincRNA	expressed
ENSG00000160202.6	protein_coding	non-expressed
ENSG00000234886.1	processed_pseudogene	non-expressed
ENSG00000212593.1	snoRNA	non-expressed
ENSG00000235565.1	lincRNA	expressed
ENSG00000204308.7	protein_coding	expressed
ENSG00000275693.1	misc_RNA	non-expressed
ENSG00000230294.4	lincRNA	non-expressed
ENSG00000126903.14	protein_coding	expressed
ENSG00000174165.6	protein_coding	expressed
ENSG00000234864.1	lincRNA	non-expressed
ENSG00000255076.2	sense_intronic	non-expressed
ENSG00000143751.9	protein_coding	expressed
ENSG00000150676.11	protein_coding	expressed
ENSG00000277125.1	unprocessed_pseudogene	non-expressed
ENSG00000178596.10	processed_pseudogene	non-expressed
ENSG00000222744.1	misc_RNA	non-expressed
ENSG00000253554.4	antisense	non-expressed
ENSG00000204429.4	processed_pseudogene	expressed
ENSG00000225809.1	unprocessed_pseudogene	non-expressed
ENSG00000277008.1	unprocessed_pseudogene	non-expressed
ENSG00000111254.6	protein_coding	expressed
ENSG00000243669.2	processed_pseudogene	non-expressed
ENSG00000110871.13	protein_coding	expressed
ENSG00000263326.1	unprocessed_pseudogene	expressed
ENSG00000271691.1	unprocessed_pseudogene	non-expressed
ENSG00000266711.1	antisense	non-expressed
ENSG00000231169.4	processed_pseudogene	non-expressed
ENSG00000257582.4	lincRNA	non-expressed
ENSG00000258450.1	sense_intronic	expressed
ENSG00000171657.5	protein_coding	expressed
ENSG00000265883.1	processed_pseudogene	non-expressed
ENSG00000204092.2	lincRNA	non-expressed
ENSG00000142798.15	protein_coding	expressed
ENSG00000241074.3	misc_RNA	non-expressed
ENSG00000272129.1	lincRNA	expressed
ENSG00000234756.1	lincRNA	non-expressed
ENSG00000232946.1	processed_pseudogene	expressed
ENSG00000258136.1	antisense	expressed
ENSG00000214684.2	processed_pseudogene	non-expressed
ENSG00000259009.4	unprocessed_pseudogene	non-expressed
ENSG00000248766.2	processed_pseudogene	non-expressed
ENSG00000258375.2	processed_pseudogene	non-expressed
ENSG00000271121.2	processed_pseudogene	non-expressed
ENSG00000242082.1	antisense	expressed
ENSG00000280272.1	TEC	non-expressed
ENSG00000151422.11	protein_coding	expressed
ENSG00000079263.17	protein_coding	expressed
ENSG00000174576.7	protein_coding	expressed
ENSG00000183878.14	protein_coding	non-expressed
ENSG00000259861.1	lincRNA	non-expressed
ENSG00000226450.2	unprocessed_pseudogene	expressed
ENSG00000228074.1	processed_pseudogene	non-expressed
ENSG00000230801.1	processed_pseudogene	non-expressed
ENSG00000234464.1	lincRNA	non-expressed
ENSG00000237480.1	lincRNA	non-expressed
ENSG00000222397.1	misc_RNA	non-expressed
ENSG00000163531.14	protein_coding	expressed
ENSG00000216904.2	processed_pseudogene	non-expressed
ENSG00000239998.4	protein_coding	expressed
ENSG00000211942.3	IG_V_gene	expressed
ENSG00000233264.2	processed_pseudogene	expressed
ENSG00000162980.15	protein_coding	expressed
ENSG00000206958.1	snoRNA	non-expressed
ENSG00000112855.13	protein_coding	expressed
ENSG00000265073.1	antisense	non-expressed
ENSG00000278076.1	miRNA	non-expressed
ENSG00000162402.11	protein_coding	expressed
ENSG00000277483.1	misc_RNA	non-expressed
ENSG00000201747.1	snRNA	non-expressed
ENSG00000101191.15	protein_coding	expressed
ENSG00000237743.3	transcribed_unprocessed_pseudogene	non-expressed
ENSG00000279541.1	TEC	expressed
ENSG00000146926.9	protein_coding	non-expressed
ENSG00000265752.2	lincRNA	expressed
ENSG00000178934.4	protein_coding	expressed
ENSG00000233684.2	lincRNA	non-expressed
ENSG00000263707.1	antisense	non-expressed
ENSG00000136213.9	protein_coding	expressed
ENSG00000259781.1	processed_pseudogene	expressed
ENSG00000010810.16	protein_coding	expressed
ENSG00000153048.9	protein_coding	expressed
ENSG00000234257.1	processed_pseudogene	non-expressed
ENSG00000261039.2	lincRNA	expressed
ENSG00000124212.5	protein_coding	expressed
ENSG00000124406.15	protein_coding	expressed
ENSG00000120699.11	protein_coding	expressed
ENSG00000211912.1	IG_D_gene	non-expressed
ENSG00000280122.1	TEC	non-expressed
ENSG00000186479.4	protein_coding	expressed
ENSG00000123066.6	protein_coding	expressed
ENSG00000221424.1	miRNA	non-expressed
ENSG00000224209.5	lincRNA	expressed
ENSG00000144827.7	protein_coding	expressed
ENSG00000272832.1	lincRNA	non-expressed
ENSG00000270093.1	lincRNA	expressed
ENSG00000164488.10	protein_coding	expressed
ENSG00000258036.1	unprocessed_pseudogene	non-expressed
ENSG00000265631.1	processed_pseudogene	non-expressed
ENSG00000256294.6	protein_coding	expressed
ENSG00000206931.1	snRNA	non-expressed
ENSG00000200693.2	snoRNA	expressed
ENSG00000211683.3	processed_transcript	expressed
ENSG00000266656.1	miRNA	non-expressed
ENSG00000258408.1	processed_pseudogene	expressed
ENSG00000262663.1	lincRNA	expressed
ENSG00000201707.1	snRNA	non-expressed
ENSG00000170325.13	protein_coding	expressed
ENSG00000267162.1	processed_pseudogene	non-expressed
ENSG00000199153.1	miRNA	non-expressed
ENSG00000224204.1	antisense	expressed
ENSG00000103460.15	protein_coding	expressed
ENSG00000188334.3	protein_coding	non-expressed
ENSG00000182591.5	protein_coding	non-expressed
ENSG00000277592.1	misc_RNA	non-expressed
ENSG00000249038.2	processed_pseudogene	non-expressed
ENSG00000259621.1	antisense	non-expressed
ENSG00000271049.1	processed_pseudogene	expressed
ENSG00000269927.1	lincRNA	non-expressed
ENSG00000206858.1	misc_RNA	non-expressed
ENSG00000241064.3	misc_RNA	non-expressed
ENSG00000229528.1	antisense	non-expressed
ENSG00000264879.2	misc_RNA	non-expressed
ENSG00000239393.1	processed_pseudogene	non-expressed
ENSG00000240821.1	processed_pseudogene	non-expressed
ENSG00000266666.1	miRNA	non-expressed
ENSG00000250427.1	lincRNA	non-expressed
ENSG00000250486.3	protein_coding	expressed
ENSG00000244649.3	lincRNA	expressed
ENSG00000083838.14	protein_coding	expressed
ENSG00000134255.12	protein_coding	expressed
ENSG00000165355.7	protein_coding	expressed
ENSG00000189013.13	protein_coding	expressed
ENSG00000101000.4	protein_coding	expressed
ENSG00000263990.1	lincRNA	expressed
ENSG00000279946.1	TEC	non-expressed
ENSG00000115947.12	protein_coding	expressed
ENSG00000230445.4	transcribed_processed_pseudogene	expressed
ENSG00000254538.1	lincRNA	non-expressed
ENSG00000227745.1	unprocessed_pseudogene	non-expressed
ENSG00000239333.3	misc_RNA	non-expressed
ENSG00000252661.1	snRNA	non-expressed
ENSG00000100441.8	protein_coding	expressed
ENSG00000233288.1	lincRNA	expressed
ENSG00000264406.1	miRNA	non-expressed
ENSG00000243538.1	processed_pseudogene	expressed
ENSG00000251438.1	antisense	non-expressed
ENSG00000215915.8	protein_coding	expressed
ENSG00000200815.1	snRNA	non-expressed
ENSG00000234283.1	lincRNA	non-expressed
ENSG00000143702.14	protein_coding	expressed
ENSG00000213435.3	processed_pseudogene	non-expressed
ENSG00000249990.1	processed_pseudogene	non-expressed
ENSG00000240241.4	lincRNA	non-expressed
ENSG00000226827.1	processed_pseudogene	non-expressed
ENSG00000244756.1	processed_pseudogene	non-expressed
ENSG00000198156.9	protein_coding	expressed
ENSG00000258517.1	lincRNA	non-expressed
ENSG00000251031.1	lincRNA	non-expressed
ENSG00000237363.1	unprocessed_pseudogene	non-expressed
ENSG00000226317.2	lincRNA	non-expressed
ENSG00000224906.3	processed_pseudogene	non-expressed
ENSG00000250915.1	lincRNA	non-expressed
ENSG00000204936.8	protein_coding	expressed
ENSG00000122068.11	protein_coding	expressed
ENSG00000234692.1	lincRNA	expressed
ENSG00000275315.1	unprocessed_pseudogene	non-expressed
ENSG00000228851.1	unprocessed_pseudogene	non-expressed
ENSG00000251603.1	antisense	expressed
ENSG00000226668.4	transcribed_unprocessed_pseudogene	non-expressed
ENSG00000238726.1	miRNA	non-expressed
ENSG00000188816.3	protein_coding	expressed
ENSG00000261600.1	lincRNA	expressed
ENSG00000119844.13	protein_coding	expressed
ENSG00000202529.1	snoRNA	non-expressed
ENSG00000214353.6	antisense	expressed
ENSG00000167770.10	protein_coding	expressed
ENSG00000256081.2	processed_pseudogene	non-expressed
ENSG00000268500.4	protein_coding	non-expressed
ENSG00000218305.3	processed_pseudogene	non-expressed
ENSG00000281593.1	protein_coding	expressed
ENSG00000257198.5	transcribed_unprocessed_pseudogene	non-expressed
ENSG00000250252.1	lincRNA	non-expressed
ENSG00000254884.1	processed_pseudogene	non-expressed
ENSG00000274124.1	antisense	expressed
ENSG00000275830.1	lincRNA	expressed
ENSG00000135083.13	protein_coding	expressed
ENSG00000254519.2	lincRNA	non-expressed
ENSG00000101367.8	protein_coding	expressed
ENSG00000273063.1	antisense	non-expressed
ENSG00000249988.1	lincRNA	non-expressed
ENSG00000166405.13	protein_coding	expressed
ENSG00000255987.1	processed_pseudogene	expressed
ENSG00000267048.1	processed_transcript	expressed
ENSG00000213315.5	processed_pseudogene	expressed
ENSG00000227799.1	processed_pseudogene	expressed
ENSG00000239900.10	protein_coding	expressed
ENSG00000271251.1	processed_pseudogene	non-expressed
ENSG00000114993.14	protein_coding	expressed
ENSG00000189332.5	transcribed_unprocessed_pseudogene	non-expressed
ENSG00000117682.15	protein_coding	expressed
ENSG00000174450.10	protein_coding	non-expressed
ENSG00000110169.9	protein_coding	expressed
ENSG00000010319.5	protein_coding	expressed
ENSG00000204021.3	protein_coding	expressed
ENSG00000189420.8	protein_coding	expressed
ENSG00000232065.1	antisense	expressed
ENSG00000198833.6	protein_coding	expressed
ENSG00000201048.1	misc_RNA	non-expressed
ENSG00000275126.1	protein_coding	non-expressed
ENSG00000258822.1	unprocessed_pseudogene	non-expressed
ENSG00000201807.1	snoRNA	non-expressed
ENSG00000256311.1	antisense	non-expressed
ENSG00000244128.4	lincRNA	non-expressed
ENSG00000222667.1	snRNA	non-expressed
ENSG00000211779.3	TR_V_gene	expressed
ENSG00000202427.1	snRNA	non-expressed
ENSG00000274501.1	antisense	expressed
ENSG00000259056.1	transcribed_unprocessed_pseudogene	non-expressed
ENSG00000226433.1	antisense	non-expressed
ENSG00000018625.13	protein_coding	expressed
ENSG00000165502.6	protein_coding	expressed
ENSG00000111711.8	protein_coding	expressed
ENSG00000248684.1	processed_pseudogene	non-expressed
ENSG00000172322.12	protein_coding	expressed
ENSG00000281632.1	miRNA	non-expressed
ENSG00000255029.1	lincRNA	non-expressed
ENSG00000240281.2	processed_pseudogene	non-expressed
ENSG00000122545.16	protein_coding	expressed
ENSG00000201742.1	snRNA	non-expressed
ENSG00000137804.11	protein_coding	expressed
ENSG00000202225.1	rRNA	non-expressed
ENSG00000233385.1	unprocessed_pseudogene	non-expressed
ENSG00000087116.12	protein_coding	expressed
ENSG00000221280.2	miRNA	non-expressed
ENSG00000231961.1	processed_pseudogene	non-expressed
ENSG00000226695.1	processed_pseudogene	non-expressed
ENSG00000115268.8	protein_coding	expressed
ENSG00000179361.16	protein_coding	expressed
ENSG00000146143.16	protein_coding	expressed
ENSG00000089050.13	protein_coding	expressed
ENSG00000259724.1	lincRNA	non-expressed
ENSG00000234380.1	antisense	expressed
ENSG00000103599.18	protein_coding	expressed
ENSG00000279085.1	antisense	non-expressed
ENSG00000107331.15	protein_coding	expressed
ENSG00000252817.2	miRNA	expressed
ENSG00000252891.1	misc_RNA	non-expressed
ENSG00000153317.13	protein_coding	expressed
ENSG00000259375.1	antisense	non-expressed
ENSG00000229030.1	processed_pseudogene	non-expressed
ENSG00000207726.2	miRNA	non-expressed
ENSG00000254428.1	antisense	expressed
ENSG00000184661.12	protein_coding	expressed
ENSG00000236252.2	transcribed_processed_pseudogene	non-expressed
ENSG00000271195.1	processed_pseudogene	non-expressed
ENSG00000237913.1	processed_pseudogene	non-expressed
ENSG00000261122.5	lincRNA	non-expressed
ENSG00000242405.2	processed_pseudogene	non-expressed
ENSG00000274127.1	misc_RNA	non-expressed
[truncated: 58,484 more rows]

## Sheet: COAD
gene	gene_type	status
ENSG00000207922.1	miRNA	non-expressed
ENSG00000168872.14	protein_coding	expressed
ENSG00000182272.10	protein_coding	expressed
ENSG00000251686.1	unprocessed_pseudogene	non-expressed
ENSG00000108960.6	protein_coding	expressed
ENSG00000252452.1	snRNA	non-expressed
ENSG00000275075.1	processed_pseudogene	non-expressed
ENSG00000196814.13	protein_coding	expressed
ENSG00000134323.10	protein_coding	expressed
ENSG00000239373.3	misc_RNA	non-expressed
ENSG00000139537.9	protein_coding	expressed
ENSG00000145723.15	protein_coding	expressed
ENSG00000263305.1	lincRNA	non-expressed
ENSG00000204754.3	lincRNA	non-expressed
ENSG00000235011.2	lincRNA	non-expressed
ENSG00000132932.15	protein_coding	expressed
ENSG00000257115.1	protein_coding	non-expressed
ENSG00000272971.1	lincRNA	non-expressed
ENSG00000196661.3	protein_coding	non-expressed
ENSG00000197465.12	protein_coding	expressed
ENSG00000231812.1	processed_pseudogene	non-expressed
ENSG00000254586.1	lincRNA	non-expressed
ENSG00000145826.7	protein_coding	non-expressed
ENSG00000265778.2	antisense	expressed
ENSG00000200957.1	snRNA	non-expressed
ENSG00000278203.1	miRNA	non-expressed
ENSG00000117090.13	protein_coding	expressed
ENSG00000061492.10	protein_coding	non-expressed
ENSG00000237798.1	antisense	non-expressed
ENSG00000214248.2	antisense	expressed
ENSG00000213416.3	protein_coding	non-expressed
ENSG00000247151.5	antisense	expressed
ENSG00000214184.3	antisense	expressed
ENSG00000250863.1	lincRNA	non-expressed
ENSG00000197763.11	protein_coding	expressed
ENSG00000139116.16	protein_coding	expressed
ENSG00000243431.1	processed_pseudogene	expressed
ENSG00000265485.4	lincRNA	expressed
ENSG00000270750.1	lincRNA	expressed
ENSG00000116133.10	protein_coding	expressed
ENSG00000229720.1	lincRNA	expressed
ENSG00000277189.1	miRNA	non-expressed
ENSG00000227207.2	processed_pseudogene	non-expressed
ENSG00000134138.18	protein_coding	expressed
ENSG00000173262.10	protein_coding	expressed
ENSG00000212254.1	snRNA	non-expressed
ENSG00000144381.15	protein_coding	expressed
ENSG00000176896.8	protein_coding	expressed
ENSG00000225471.4	transcribed_processed_pseudogene	expressed
ENSG00000250902.1	antisense	non-expressed
ENSG00000129474.14	protein_coding	expressed
ENSG00000171476.20	protein_coding	expressed
ENSG00000280511.1	lincRNA	non-expressed
ENSG00000234551.1	lincRNA	non-expressed
ENSG00000187621.13	processed_transcript	expressed
ENSG00000138152.8	protein_coding	expressed
ENSG00000241280.1	lincRNA	non-expressed
ENSG00000227777.1	processed_pseudogene	expressed
ENSG00000177243.3	protein_coding	non-expressed
ENSG00000230838.1	lincRNA	expressed
ENSG00000268051.1	sense_intronic	non-expressed
ENSG00000255121.2	lincRNA	expressed
ENSG00000188467.9	protein_coding	non-expressed
ENSG00000245729.2	lincRNA	non-expressed
ENSG00000178965.12	protein_coding	expressed
ENSG00000277043.1	processed_pseudogene	expressed
ENSG00000238304.1	snRNA	non-expressed
ENSG00000178031.14	protein_coding	expressed
ENSG00000172752.13	protein_coding	expressed
ENSG00000067900.6	protein_coding	expressed
ENSG00000011114.13	protein_coding	expressed
ENSG00000130518.15	protein_coding	expressed
ENSG00000101166.14	protein_coding	expressed
ENSG00000103343.11	protein_coding	expressed
ENSG00000140553.15	protein_coding	expressed
ENSG00000203756.6	protein_coding	non-expressed
ENSG00000266364.1	transcribed_processed_pseudogene	non-expressed
ENSG00000025800.12	protein_coding	expressed
ENSG00000166317.10	protein_coding	expressed
ENSG00000250273.1	processed_pseudogene	non-expressed
ENSG00000243115.3	misc_RNA	non-expressed
ENSG00000184076.12	protein_coding	expressed
ENSG00000134748.12	protein_coding	expressed
ENSG00000227331.1	processed_pseudogene	expressed
ENSG00000261731.2	antisense	non-expressed
ENSG00000240767.3	misc_RNA	non-expressed
ENSG00000176387.6	protein_coding	expressed
ENSG00000241146.1	processed_pseudogene	non-expressed
ENSG00000146278.10	protein_coding	expressed
ENSG00000267679.1	processed_pseudogene	expressed
ENSG00000226200.5	antisense	expressed
ENSG00000162654.8	protein_coding	expressed
ENSG00000270612.1	processed_pseudogene	non-expressed
ENSG00000094804.8	protein_coding	expressed
ENSG00000116209.10	protein_coding	expressed
ENSG00000081853.14	protein_coding	expressed
ENSG00000248514.1	antisense	expressed
ENSG00000237252.1	processed_pseudogene	non-expressed
ENSG00000271100.1	processed_pseudogene	non-expressed
ENSG00000232661.1	antisense	expressed
ENSG00000254164.1	lincRNA	non-expressed
ENSG00000225639.1	processed_pseudogene	non-expressed
ENSG00000224244.1	unprocessed_pseudogene	non-expressed
ENSG00000269954.1	lincRNA	non-expressed
ENSG00000185519.8	protein_coding	expressed
ENSG00000159055.3	protein_coding	expressed
ENSG00000204603.5	lincRNA	non-expressed
ENSG00000201242.1	misc_RNA	non-expressed
ENSG00000242036.1	processed_pseudogene	non-expressed
ENSG00000258747.1	antisense	non-expressed
ENSG00000265744.1	miRNA	non-expressed
ENSG00000230223.5	antisense	non-expressed
ENSG00000119915.4	protein_coding	expressed
ENSG00000281273.1	protein_coding	non-expressed
ENSG00000276037.1	miRNA	non-expressed
ENSG00000103710.9	protein_coding	expressed
ENSG00000254415.3	protein_coding	expressed
ENSG00000255360.1	unprocessed_pseudogene	non-expressed
ENSG00000254710.1	antisense	non-expressed
ENSG00000276786.1	lincRNA	non-expressed
ENSG00000214003.2	processed_pseudogene	expressed
ENSG00000229600.1	lincRNA	non-expressed
ENSG00000234877.2	lincRNA	non-expressed
ENSG00000111674.7	protein_coding	expressed
ENSG00000252575.1	miRNA	non-expressed
ENSG00000278870.1	polymorphic_pseudogene	non-expressed
ENSG00000007168.11	protein_coding	expressed
ENSG00000236615.1	unprocessed_pseudogene	non-expressed
ENSG00000231610.1	processed_pseudogene	non-expressed
ENSG00000233120.1	unprocessed_pseudogene	non-expressed
ENSG00000179673.4	protein_coding	expressed
ENSG00000237115.2	processed_pseudogene	expressed
ENSG00000218809.1	unprocessed_pseudogene	expressed
ENSG00000221234.1	miRNA	non-expressed
ENSG00000231816.1	lincRNA	expressed
ENSG00000259389.2	processed_pseudogene	non-expressed
ENSG00000248873.1	processed_pseudogene	expressed
ENSG00000277767.1	lincRNA	expressed
ENSG00000234763.1	lincRNA	non-expressed
ENSG00000203697.10	protein_coding	expressed
ENSG00000229536.1	lincRNA	non-expressed
ENSG00000275084.2	snoRNA	expressed
ENSG00000278123.1	snoRNA	non-expressed
ENSG00000201176.1	snRNA	non-expressed
ENSG00000267383.5	antisense	expressed
ENSG00000145293.13	protein_coding	expressed
ENSG00000139910.18	protein_coding	expressed
ENSG00000228995.1	processed_pseudogene	expressed
ENSG00000168389.16	protein_coding	expressed
ENSG00000238561.1	snRNA	non-expressed
ENSG00000206779.1	misc_RNA	non-expressed
ENSG00000105223.17	protein_coding	expressed
ENSG00000164062.11	protein_coding	expressed
ENSG00000272288.4	antisense	expressed
ENSG00000264801.1	transcribed_processed_pseudogene	expressed
ENSG00000237449.1	unitary_pseudogene	non-expressed
ENSG00000253164.4	lincRNA	non-expressed
ENSG00000252316.1	misc_RNA	non-expressed
ENSG00000259856.1	processed_pseudogene	expressed
ENSG00000251546.1	IG_V_gene	expressed
ENSG00000259151.2	transcribed_processed_pseudogene	expressed
ENSG00000239763.2	processed_pseudogene	expressed
ENSG00000198626.14	protein_coding	expressed
ENSG00000256480.1	processed_pseudogene	non-expressed
ENSG00000272902.2	lincRNA	expressed
ENSG00000099953.8	protein_coding	expressed
ENSG00000225407.3	antisense	non-expressed
ENSG00000173275.11	protein_coding	expressed
ENSG00000271933.1	antisense	expressed
ENSG00000249811.2	protein_coding	non-expressed
ENSG00000249404.1	lincRNA	non-expressed
ENSG00000227995.1	processed_pseudogene	non-expressed
ENSG00000222842.1	misc_RNA	non-expressed
ENSG00000275220.1	miRNA	non-expressed
ENSG00000251323.2	lincRNA	expressed
ENSG00000264345.1	lincRNA	non-expressed
ENSG00000223652.2	antisense	expressed
ENSG00000230650.1	processed_pseudogene	expressed
ENSG00000277987.1	lincRNA	non-expressed
ENSG00000134900.10	protein_coding	expressed
ENSG00000207548.2	miRNA	non-expressed
ENSG00000224943.1	lincRNA	non-expressed
ENSG00000278907.1	antisense	non-expressed
ENSG00000262151.1	antisense	non-expressed
ENSG00000259347.4	lincRNA	expressed
ENSG00000160396.8	protein_coding	expressed
ENSG00000177888.7	protein_coding	expressed
ENSG00000177990.10	protein_coding	expressed
ENSG00000235750.8	protein_coding	expressed
ENSG00000276150.1	misc_RNA	non-expressed
ENSG00000238448.1	miRNA	non-expressed
ENSG00000159445.11	protein_coding	expressed
ENSG00000267150.1	antisense	expressed
ENSG00000232109.1	processed_pseudogene	non-expressed
ENSG00000137675.4	protein_coding	expressed
ENSG00000229531.4	antisense	non-expressed
ENSG00000178458.5	processed_pseudogene	expressed
ENSG00000207559.1	miRNA	non-expressed
ENSG00000006432.14	protein_coding	expressed
ENSG00000260307.2	processed_pseudogene	non-expressed
ENSG00000259115.1	lincRNA	non-expressed
ENSG00000235831.5	antisense	expressed
ENSG00000226804.4	processed_pseudogene	non-expressed
ENSG00000155561.13	protein_coding	expressed
ENSG00000223966.1	antisense	non-expressed
ENSG00000236246.1	processed_pseudogene	non-expressed
ENSG00000106927.10	protein_coding	expressed
ENSG00000224732.1	unprocessed_pseudogene	non-expressed
ENSG00000197959.12	protein_coding	expressed
ENSG00000188313.11	protein_coding	expressed
ENSG00000231990.1	lincRNA	expressed
ENSG00000253869.1	processed_pseudogene	expressed
ENSG00000279227.1	TEC	expressed
ENSG00000270493.1	processed_pseudogene	non-expressed
ENSG00000120280.5	protein_coding	expressed
ENSG00000280039.1	TEC	expressed
ENSG00000128641.16	protein_coding	expressed
ENSG00000211944.2	IG_V_gene	expressed
ENSG00000255148.2	antisense	non-expressed
ENSG00000153060.6	protein_coding	expressed
ENSG00000270623.1	processed_pseudogene	non-expressed
ENSG00000275467.1	lincRNA	non-expressed
ENSG00000153898.11	protein_coding	expressed
ENSG00000003249.12	protein_coding	expressed
ENSG00000149506.9	protein_coding	expressed
ENSG00000106809.9	protein_coding	expressed
ENSG00000153310.17	protein_coding	expressed
ENSG00000259252.1	lincRNA	non-expressed
ENSG00000259518.1	lincRNA	non-expressed
ENSG00000218730.1	processed_pseudogene	non-expressed
ENSG00000126583.9	protein_coding	expressed
ENSG00000278128.1	processed_pseudogene	non-expressed
ENSG00000223387.5	lincRNA	expressed
ENSG00000200262.1	misc_RNA	non-expressed
ENSG00000199071.2	miRNA	non-expressed
ENSG00000105255.9	protein_coding	expressed
ENSG00000256609.1	antisense	non-expressed
ENSG00000258509.1	processed_pseudogene	expressed
ENSG00000270558.1	processed_pseudogene	expressed
ENSG00000197024.7	protein_coding	expressed
ENSG00000257355.1	protein_coding	non-expressed
ENSG00000237460.2	lincRNA	non-expressed
ENSG00000175197.9	protein_coding	expressed
ENSG00000075651.14	protein_coding	expressed
ENSG00000165092.11	protein_coding	expressed
ENSG00000266151.1	miRNA	expressed
ENSG00000252959.1	rRNA	non-expressed
ENSG00000233960.1	lincRNA	non-expressed
ENSG00000109625.17	protein_coding	expressed
ENSG00000268030.1	antisense	expressed
ENSG00000221628.1	miRNA	non-expressed
ENSG00000270605.1	antisense	expressed
ENSG00000244361.1	processed_pseudogene	expressed
ENSG00000224256.1	processed_pseudogene	non-expressed
ENSG00000266189.1	miRNA	non-expressed
ENSG00000170745.10	protein_coding	expressed
ENSG00000127995.15	protein_coding	expressed
ENSG00000279153.1	TEC	non-expressed
ENSG00000276692.1	processed_pseudogene	non-expressed
ENSG00000225640.1	lincRNA	non-expressed
ENSG00000227958.1	lincRNA	non-expressed
ENSG00000234354.3	processed_pseudogene	expressed
ENSG00000125868.14	protein_coding	expressed
ENSG00000237807.3	lincRNA	expressed
ENSG00000168137.14	protein_coding	expressed
ENSG00000182472.7	protein_coding	expressed
ENSG00000252983.1	snRNA	non-expressed
ENSG00000275716.1	processed_pseudogene	non-expressed
ENSG00000273497.1	unprocessed_pseudogene	non-expressed
ENSG00000251113.2	processed_pseudogene	non-expressed
ENSG00000213149.3	processed_pseudogene	expressed
ENSG00000173124.13	protein_coding	non-expressed
ENSG00000141985.8	protein_coding	expressed
ENSG00000168748.12	protein_coding	expressed
ENSG00000004776.10	protein_coding	expressed
ENSG00000228577.1	antisense	non-expressed
ENSG00000272113.2	misc_RNA	non-expressed
ENSG00000134443.8	protein_coding	expressed
ENSG00000201470.1	misc_RNA	non-expressed
ENSG00000252745.1	rRNA	non-expressed
ENSG00000185792.8	protein_coding	expressed
ENSG00000106327.11	protein_coding	expressed
ENSG00000112837.15	protein_coding	expressed
ENSG00000254860.4	antisense	expressed
ENSG00000267308.1	lincRNA	non-expressed
ENSG00000180747.14	transcribed_unprocessed_pseudogene	expressed
ENSG00000187122.15	protein_coding	expressed
ENSG00000142089.14	protein_coding	expressed
ENSG00000278348.1	misc_RNA	non-expressed
ENSG00000221016.1	miRNA	non-expressed
ENSG00000187792.4	protein_coding	expressed
ENSG00000124678.16	protein_coding	expressed
ENSG00000186369.8	lincRNA	expressed
ENSG00000239525.1	processed_pseudogene	non-expressed
ENSG00000140525.16	protein_coding	expressed
ENSG00000255545.6	processed_transcript	expressed
ENSG00000240533.3	misc_RNA	non-expressed
ENSG00000254279.1	IG_V_pseudogene	non-expressed
ENSG00000250260.1	lincRNA	non-expressed
ENSG00000164972.11	protein_coding	expressed
ENSG00000244260.1	lincRNA	non-expressed
ENSG00000156261.11	protein_coding	expressed
ENSG00000236844.1	processed_pseudogene	expressed
ENSG00000046653.13	protein_coding	expressed
ENSG00000277861.1	miRNA	non-expressed
ENSG00000145882.9	protein_coding	expressed
ENSG00000229654.1	lincRNA	non-expressed
ENSG00000241188.3	misc_RNA	non-expressed
ENSG00000275229.1	snRNA	non-expressed
ENSG00000200220.1	snRNA	non-expressed
ENSG00000265691.1	miRNA	non-expressed
ENSG00000239465.1	processed_pseudogene	expressed
ENSG00000175143.3	protein_coding	non-expressed
ENSG00000187533.12	protein_coding	non-expressed
ENSG00000277682.1	miRNA	non-expressed
ENSG00000183909.5	unprocessed_pseudogene	non-expressed
ENSG00000265820.1	miRNA	non-expressed
ENSG00000239988.1	processed_pseudogene	non-expressed
ENSG00000232778.1	processed_pseudogene	non-expressed
ENSG00000267452.1	lincRNA	expressed
ENSG00000279925.1	TEC	non-expressed
ENSG00000227140.3	protein_coding	non-expressed
ENSG00000280945.1	miRNA	non-expressed
ENSG00000276764.1	misc_RNA	non-expressed
ENSG00000276678.1	misc_RNA	non-expressed
ENSG00000238644.1	miRNA	non-expressed
ENSG00000221803.1	snoRNA	non-expressed
ENSG00000251400.1	processed_pseudogene	expressed
ENSG00000259374.2	transcribed_processed_pseudogene	non-expressed
ENSG00000176246.1	protein_coding	non-expressed
ENSG00000131943.16	protein_coding	expressed
ENSG00000198491.3	antisense	non-expressed
ENSG00000104472.8	protein_coding	expressed
ENSG00000239917.3	unprocessed_pseudogene	expressed
ENSG00000253571.1	processed_pseudogene	non-expressed
ENSG00000224918.1	lincRNA	non-expressed
ENSG00000212073.1	miRNA	non-expressed
ENSG00000212348.1	snRNA	non-expressed
ENSG00000259498.1	antisense	expressed
ENSG00000159259.7	protein_coding	expressed
ENSG00000262877.4	lincRNA	expressed
ENSG00000138600.8	protein_coding	expressed
ENSG00000215326.3	processed_pseudogene	expressed
ENSG00000214853.4	processed_pseudogene	non-expressed
ENSG00000276729.1	misc_RNA	non-expressed
ENSG00000146383.7	protein_coding	non-expressed
ENSG00000250976.1	antisense	non-expressed
ENSG00000201407.1	snoRNA	non-expressed
ENSG00000229862.4	antisense	expressed
ENSG00000257219.4	lincRNA	expressed
ENSG00000184571.12	protein_coding	non-expressed
ENSG00000237260.1	processed_pseudogene	non-expressed
ENSG00000237804.1	processed_pseudogene	expressed
ENSG00000264897.1	miRNA	non-expressed
ENSG00000231913.1	processed_pseudogene	non-expressed
ENSG00000279018.1	protein_coding	non-expressed
ENSG00000225637.1	lincRNA	non-expressed
ENSG00000280636.1	snoRNA	non-expressed
ENSG00000279645.1	TEC	non-expressed
ENSG00000244998.1	antisense	expressed
ENSG00000223728.3	processed_pseudogene	non-expressed
ENSG00000258623.1	antisense	expressed
ENSG00000225520.1	lincRNA	non-expressed
ENSG00000188755.8	transcribed_unprocessed_pseudogene	non-expressed
ENSG00000232998.1	antisense	non-expressed
ENSG00000163872.14	protein_coding	expressed
ENSG00000165671.17	protein_coding	expressed
ENSG00000135387.18	protein_coding	expressed
ENSG00000272742.1	antisense	non-expressed
ENSG00000225536.2	processed_pseudogene	expressed
ENSG00000229832.1	sense_intronic	expressed
ENSG00000150750.6	protein_coding	expressed
ENSG00000105254.10	protein_coding	expressed
ENSG00000256861.1	protein_coding	non-expressed
ENSG00000235903.6	antisense	expressed
ENSG00000230746.1	lincRNA	non-expressed
ENSG00000231104.7	antisense	expressed
ENSG00000165309.12	protein_coding	expressed
ENSG00000233750.3	processed_pseudogene	expressed
ENSG00000239057.1	miRNA	non-expressed
ENSG00000235875.3	antisense	non-expressed
ENSG00000138642.13	protein_coding	expressed
ENSG00000233017.2	antisense	expressed
ENSG00000264519.2	misc_RNA	non-expressed
ENSG00000168209.4	protein_coding	expressed
ENSG00000149923.12	protein_coding	expressed
ENSG00000237458.1	processed_pseudogene	non-expressed
ENSG00000088305.17	protein_coding	expressed
ENSG00000214832.5	transcribed_processed_pseudogene	expressed
ENSG00000211681.2	IG_J_gene	non-expressed
ENSG00000260113.3	processed_pseudogene	non-expressed
ENSG00000255136.2	lincRNA	non-expressed
ENSG00000133639.4	protein_coding	expressed
ENSG00000243147.6	protein_coding	expressed
ENSG00000199237.1	snRNA	non-expressed
ENSG00000207127.1	misc_RNA	non-expressed
ENSG00000108591.8	protein_coding	expressed
ENSG00000211538.1	miRNA	non-expressed
ENSG00000265639.1	processed_pseudogene	non-expressed
ENSG00000250300.1	unprocessed_pseudogene	non-expressed
ENSG00000280401.1	TEC	expressed
ENSG00000274390.1	miRNA	non-expressed
ENSG00000258963.1	unprocessed_pseudogene	non-expressed
ENSG00000199634.1	snRNA	non-expressed
ENSG00000222997.1	misc_RNA	non-expressed
ENSG00000254290.1	lincRNA	expressed
ENSG00000279058.1	protein_coding	expressed
ENSG00000249284.1	processed_pseudogene	non-expressed
ENSG00000273694.1	snRNA	non-expressed
ENSG00000271397.1	processed_pseudogene	non-expressed
ENSG00000142945.11	protein_coding	expressed
ENSG00000242278.1	processed_pseudogene	non-expressed
ENSG00000199218.1	misc_RNA	non-expressed
ENSG00000201523.1	rRNA	non-expressed
ENSG00000156414.17	protein_coding	expressed
ENSG00000134086.7	protein_coding	expressed
ENSG00000132640.13	protein_coding	expressed
ENSG00000167634.11	protein_coding	expressed
ENSG00000204991.9	protein_coding	expressed
ENSG00000240791.1	unprocessed_pseudogene	non-expressed
ENSG00000220113.2	processed_pseudogene	non-expressed
ENSG00000253203.5	transcribed_unprocessed_pseudogene	expressed
ENSG00000225302.2	antisense	expressed
ENSG00000111843.12	protein_coding	expressed
ENSG00000258591.2	processed_pseudogene	expressed
ENSG00000268812.3	antisense	expressed
ENSG00000274092.1	antisense	expressed
ENSG00000149243.14	protein_coding	expressed
ENSG00000250173.1	lincRNA	non-expressed
ENSG00000241956.8	antisense	non-expressed
ENSG00000250622.1	processed_pseudogene	non-expressed
ENSG00000248521.1	processed_pseudogene	non-expressed
ENSG00000201348.1	snoRNA	non-expressed
ENSG00000204175.5	protein_coding	expressed
ENSG00000225352.1	processed_pseudogene	non-expressed
ENSG00000101966.11	protein_coding	expressed
ENSG00000253054.1	snRNA	non-expressed
ENSG00000215483.7	lincRNA	expressed
ENSG00000207387.1	misc_RNA	non-expressed
ENSG00000213924.3	processed_pseudogene	non-expressed
ENSG00000162616.8	protein_coding	expressed
ENSG00000183474.14	protein_coding	expressed
ENSG00000228265.4	lincRNA	expressed
ENSG00000258926.1	antisense	expressed
ENSG00000136697.11	protein_coding	non-expressed
ENSG00000214282.3	processed_pseudogene	expressed
ENSG00000219361.1	processed_pseudogene	expressed
ENSG00000204837.3	unprocessed_pseudogene	expressed
ENSG00000132622.9	protein_coding	expressed
ENSG00000243220.1	antisense	non-expressed
ENSG00000236885.1	lincRNA	non-expressed
ENSG00000114737.14	protein_coding	expressed
ENSG00000135749.17	protein_coding	expressed
ENSG00000261468.1	sense_overlapping	expressed
ENSG00000130427.2	protein_coding	expressed
ENSG00000231628.1	antisense	expressed
ENSG00000189319.12	protein_coding	expressed
ENSG00000251257.2	antisense	non-expressed
ENSG00000155229.19	protein_coding	expressed
ENSG00000165409.14	protein_coding	expressed
ENSG00000188869.11	protein_coding	expressed
ENSG00000201179.1	snRNA	non-expressed
ENSG00000235203.2	unprocessed_pseudogene	non-expressed
ENSG00000279319.1	TEC	expressed
ENSG00000131378.12	protein_coding	expressed
ENSG00000231963.1	antisense	non-expressed
ENSG00000227186.1	antisense	non-expressed
ENSG00000254070.1	processed_pseudogene	non-expressed
ENSG00000158485.9	protein_coding	expressed
ENSG00000229192.5	lincRNA	non-expressed
ENSG00000274420.1	misc_RNA	non-expressed
ENSG00000224411.3	processed_pseudogene	expressed
ENSG00000266304.1	lincRNA	non-expressed
ENSG00000225397.1	processed_pseudogene	non-expressed
ENSG00000226360.5	processed_pseudogene	expressed
ENSG00000267301.1	processed_pseudogene	non-expressed
ENSG00000226609.1	antisense	expressed
ENSG00000217539.2	processed_pseudogene	non-expressed
ENSG00000233996.1	processed_pseudogene	expressed
ENSG00000269191.1	antisense	expressed
ENSG00000144935.13	protein_coding	expressed
ENSG00000184659.5	protein_coding	non-expressed
ENSG00000251401.2	processed_pseudogene	non-expressed
ENSG00000225807.1	lincRNA	non-expressed
ENSG00000227513.1	processed_pseudogene	non-expressed
ENSG00000213750.4	processed_pseudogene	expressed
ENSG00000239659.2	processed_pseudogene	non-expressed
ENSG00000241693.2	misc_RNA	expressed
ENSG00000278703.1	lincRNA	expressed
ENSG00000109133.11	protein_coding	expressed
ENSG00000138028.13	protein_coding	expressed
ENSG00000075420.11	protein_coding	expressed
ENSG00000169509.5	protein_coding	non-expressed
ENSG00000221725.1	snRNA	non-expressed
ENSG00000249045.1	unprocessed_pseudogene	non-expressed
ENSG00000271173.1	processed_pseudogene	non-expressed
ENSG00000257150.2	transcribed_processed_pseudogene	expressed
ENSG00000125089.15	protein_coding	expressed
ENSG00000242607.1	processed_pseudogene	expressed
ENSG00000256343.6	lincRNA	non-expressed
ENSG00000275510.1	miRNA	non-expressed
ENSG00000271468.1	processed_pseudogene	non-expressed
ENSG00000266922.1	sense_intronic	expressed
ENSG00000254076.1	processed_pseudogene	non-expressed
ENSG00000252218.1	scaRNA	non-expressed
ENSG00000171612.6	protein_coding	expressed
ENSG00000231341.1	processed_pseudogene	expressed
ENSG00000228569.1	lincRNA	expressed
ENSG00000198106.8	lincRNA	expressed
ENSG00000240800.1	transcribed_unprocessed_pseudogene	non-expressed
ENSG00000166845.12	protein_coding	expressed
ENSG00000200530.1	snoRNA	non-expressed
ENSG00000123999.4	protein_coding	expressed
ENSG00000277468.1	misc_RNA	non-expressed
ENSG00000176922.3	protein_coding	non-expressed
ENSG00000221910.2	protein_coding	non-expressed
ENSG00000260866.1	unprocessed_pseudogene	non-expressed
ENSG00000215895.4	processed_pseudogene	expressed
ENSG00000221354.1	miRNA	non-expressed
ENSG00000100288.18	protein_coding	expressed
ENSG00000251286.2	processed_pseudogene	non-expressed
ENSG00000145908.11	protein_coding	expressed
ENSG00000234848.1	antisense	expressed
ENSG00000275992.1	misc_RNA	non-expressed
ENSG00000146122.15	protein_coding	expressed
ENSG00000163297.15	protein_coding	expressed
ENSG00000254531.1	lincRNA	expressed
ENSG00000253671.1	processed_transcript	expressed
ENSG00000269392.1	antisense	expressed
ENSG00000256197.1	sense_intronic	non-expressed
ENSG00000214835.3	processed_pseudogene	non-expressed
ENSG00000260086.2	lincRNA	expressed
ENSG00000279685.2	sense_intronic	non-expressed
ENSG00000244278.1	lincRNA	non-expressed
ENSG00000279656.1	TEC	expressed
ENSG00000198983.1	miRNA	non-expressed
ENSG00000171481.3	protein_coding	non-expressed
ENSG00000115523.15	protein_coding	expressed
ENSG00000279786.1	TEC	expressed
ENSG00000132204.12	lincRNA	expressed
ENSG00000257259.1	lincRNA	non-expressed
ENSG00000235040.1	unprocessed_pseudogene	non-expressed
ENSG00000240591.1	antisense	expressed
ENSG00000112576.11	protein_coding	expressed
ENSG00000082068.7	protein_coding	expressed
ENSG00000240993.3	misc_RNA	non-expressed
ENSG00000274685.1	lincRNA	non-expressed
ENSG00000206077.9	protein_coding	expressed
ENSG00000226533.1	antisense	non-expressed
ENSG00000104765.13	protein_coding	expressed
ENSG00000259950.1	processed_pseudogene	non-expressed
ENSG00000230304.1	processed_pseudogene	non-expressed
ENSG00000266276.2	miRNA	non-expressed
ENSG00000171671.6	antisense	non-expressed
ENSG00000259604.4	lincRNA	non-expressed
ENSG00000265043.1	lincRNA	non-expressed
ENSG00000226964.1	processed_pseudogene	expressed
ENSG00000063015.18	protein_coding	expressed
ENSG00000140612.12	protein_coding	expressed
ENSG00000227800.1	IG_D_gene	non-expressed
ENSG00000163482.10	protein_coding	expressed
ENSG00000171401.13	protein_coding	expressed
ENSG00000242668.3	misc_RNA	non-expressed
ENSG00000224914.2	lincRNA	expressed
ENSG00000273117.1	lincRNA	expressed
ENSG00000099715.13	protein_coding	non-expressed
ENSG00000224530.1	processed_pseudogene	non-expressed
ENSG00000263776.1	snoRNA	non-expressed
ENSG00000279174.1	TEC	expressed
ENSG00000277490.1	processed_pseudogene	non-expressed
ENSG00000125845.6	protein_coding	expressed
ENSG00000272909.1	antisense	expressed
ENSG00000236648.1	lincRNA	non-expressed
ENSG00000280953.1	lincRNA	non-expressed
ENSG00000271187.1	processed_pseudogene	non-expressed
ENSG00000252091.1	snRNA	non-expressed
ENSG00000278946.1	antisense	non-expressed
ENSG00000200817.1	snRNA	non-expressed
ENSG00000212378.1	snoRNA	non-expressed
ENSG00000230542.4	lincRNA	expressed
ENSG00000272953.1	lincRNA	expressed
ENSG00000233887.1	processed_pseudogene	non-expressed
ENSG00000202398.1	snRNA	non-expressed
ENSG00000206638.1	snRNA	non-expressed
ENSG00000227775.3	transcribed_processed_pseudogene	expressed
ENSG00000087274.15	protein_coding	expressed
ENSG00000162704.14	protein_coding	expressed
ENSG00000249501.1	unprocessed_pseudogene	non-expressed
ENSG00000228392.1	lincRNA	non-expressed
ENSG00000205944.10	protein_coding	non-expressed
ENSG00000183318.10	protein_coding	non-expressed
ENSG00000051180.15	protein_coding	expressed
ENSG00000201218.1	misc_RNA	non-expressed
ENSG00000269243.1	antisense	expressed
ENSG00000258780.1	unprocessed_pseudogene	non-expressed
ENSG00000225559.1	lincRNA	non-expressed
ENSG00000216206.1	miRNA	non-expressed
ENSG00000128564.6	protein_coding	expressed
ENSG00000223907.1	lincRNA	expressed
ENSG00000276513.1	miRNA	non-expressed
ENSG00000236511.1	lincRNA	non-expressed
ENSG00000237129.1	processed_pseudogene	non-expressed
ENSG00000239809.1	processed_pseudogene	expressed
ENSG00000270075.1	antisense	non-expressed
ENSG00000274584.1	unprocessed_pseudogene	expressed
ENSG00000136158.9	protein_coding	expressed
ENSG00000199065.2	miRNA	non-expressed
ENSG00000223244.1	miRNA	non-expressed
ENSG00000142867.11	protein_coding	expressed
ENSG00000261813.2	processed_pseudogene	expressed
ENSG00000116830.10	protein_coding	expressed
ENSG00000253561.1	lincRNA	non-expressed
ENSG00000267000.1	antisense	non-expressed
ENSG00000278586.1	processed_pseudogene	non-expressed
ENSG00000230231.1	unprocessed_pseudogene	non-expressed
ENSG00000272182.1	antisense	expressed
ENSG00000176142.11	protein_coding	expressed
ENSG00000243633.3	misc_RNA	non-expressed
ENSG00000255120.4	antisense	expressed
ENSG00000186417.12	protein_coding	expressed
ENSG00000255124.1	lincRNA	non-expressed
ENSG00000229067.1	processed_pseudogene	non-expressed
ENSG00000248564.1	processed_pseudogene	non-expressed
ENSG00000165555.8	protein_coding	expressed
ENSG00000259579.1	lincRNA	non-expressed
ENSG00000261542.1	lincRNA	expressed
ENSG00000227602.1	sense_intronic	non-expressed
ENSG00000225331.1	lincRNA	expressed
ENSG00000233884.1	antisense	non-expressed
ENSG00000240423.1	lincRNA	non-expressed
ENSG00000222205.1	rRNA	non-expressed
ENSG00000233220.3	lincRNA	expressed
ENSG00000143125.5	protein_coding	non-expressed
ENSG00000260276.2	antisense	expressed
ENSG00000220553.1	processed_pseudogene	non-expressed
ENSG00000257766.1	antisense	expressed
ENSG00000221385.1	miRNA	non-expressed
ENSG00000248333.6	protein_coding	expressed
ENSG00000112559.12	protein_coding	expressed
ENSG00000235526.1	antisense	non-expressed
ENSG00000250071.1	processed_pseudogene	expressed
ENSG00000277854.1	miRNA	non-expressed
ENSG00000207138.1	snRNA	non-expressed
ENSG00000143493.11	protein_coding	expressed
ENSG00000129910.6	protein_coding	expressed
ENSG00000182873.5	antisense	expressed
ENSG00000145604.14	protein_coding	expressed
ENSG00000182901.14	protein_coding	expressed
ENSG00000253267.4	antisense	non-expressed
ENSG00000207518.1	snRNA	non-expressed
ENSG00000186788.11	transcribed_unprocessed_pseudogene	non-expressed
ENSG00000230661.1	processed_pseudogene	expressed
ENSG00000225972.1	unprocessed_pseudogene	expressed
ENSG00000266127.1	processed_pseudogene	non-expressed
ENSG00000235369.1	processed_pseudogene	expressed
ENSG00000264765.1	lincRNA	non-expressed
ENSG00000266538.1	lincRNA	expressed
ENSG00000253497.1	IG_V_pseudogene	expressed
ENSG00000226014.1	processed_pseudogene	non-expressed
ENSG00000259318.1	processed_pseudogene	expressed
ENSG00000255116.2	processed_pseudogene	non-expressed
ENSG00000275121.1	processed_pseudogene	non-expressed
ENSG00000223442.1	antisense	expressed
ENSG00000243195.1	processed_pseudogene	non-expressed
ENSG00000185842.13	protein_coding	expressed
ENSG00000265428.1	processed_pseudogene	non-expressed
ENSG00000174442.10	protein_coding	expressed
ENSG00000203812.2	protein_coding	non-expressed
ENSG00000266978.1	antisense	expressed
ENSG00000229208.1	unprocessed_pseudogene	non-expressed
ENSG00000257588.1	antisense	expressed
ENSG00000260601.1	sense_intronic	non-expressed
ENSG00000280298.1	protein_coding	non-expressed
ENSG00000221602.1	miRNA	non-expressed
ENSG00000268447.4	protein_coding	non-expressed
ENSG00000162783.10	protein_coding	expressed
ENSG00000126106.12	protein_coding	expressed
ENSG00000254901.6	protein_coding	expressed
ENSG00000268388.4	lincRNA	expressed
ENSG00000274210.1	snRNA	expressed
ENSG00000279390.1	TEC	expressed
ENSG00000177551.5	protein_coding	expressed
ENSG00000184863.9	protein_coding	expressed
ENSG00000138069.15	protein_coding	expressed
ENSG00000254361.1	lincRNA	non-expressed
ENSG00000280927.1	antisense	expressed
ENSG00000058272.14	protein_coding	expressed
ENSG00000160460.14	protein_coding	expressed
ENSG00000253559.1	antisense	expressed
ENSG00000141753.6	protein_coding	expressed
ENSG00000278107.1	lincRNA	expressed
ENSG00000127528.5	protein_coding	expressed
ENSG00000236108.1	processed_pseudogene	non-expressed
ENSG00000277144.1	lincRNA	expressed
ENSG00000255583.2	transcribed_unprocessed_pseudogene	non-expressed
ENSG00000253696.2	lincRNA	expressed
ENSG00000200673.1	misc_RNA	non-expressed
ENSG00000174021.9	protein_coding	expressed
ENSG00000234579.1	antisense	non-expressed
ENSG00000275690.1	miRNA	non-expressed
ENSG00000236358.1	antisense	expressed
ENSG00000280607.1	processed_transcript	non-expressed
ENSG00000248984.1	antisense	non-expressed
ENSG00000242329.1	processed_pseudogene	non-expressed
ENSG00000181404.15	protein_coding	expressed
ENSG00000119812.17	protein_coding	expressed
ENSG00000249807.1	lincRNA	non-expressed
ENSG00000260799.1	processed_pseudogene	non-expressed
ENSG00000100258.16	protein_coding	expressed
ENSG00000185668.6	protein_coding	expressed
ENSG00000257139.1	lincRNA	non-expressed
ENSG00000075073.13	protein_coding	expressed
ENSG00000260146.1	processed_pseudogene	non-expressed
ENSG00000198393.6	protein_coding	expressed
ENSG00000231346.4	lincRNA	expressed
ENSG00000215023.2	antisense	expressed
ENSG00000232864.1	processed_pseudogene	expressed
ENSG00000281190.1	miRNA	non-expressed
ENSG00000125967.15	protein_coding	expressed
ENSG00000277497.1	miRNA	non-expressed
ENSG00000267295.1	unprocessed_pseudogene	non-expressed
ENSG00000232187.1	processed_pseudogene	expressed
ENSG00000278908.1	TEC	non-expressed
ENSG00000280132.1	TEC	expressed
ENSG00000258104.1	processed_pseudogene	non-expressed
ENSG00000206739.1	misc_RNA	non-expressed
ENSG00000229999.5	antisense	expressed
ENSG00000171574.16	protein_coding	expressed
ENSG00000278008.1	processed_pseudogene	non-expressed
ENSG00000176281.4	protein_coding	non-expressed
ENSG00000225401.2	transcribed_processed_pseudogene	non-expressed
ENSG00000188859.6	protein_coding	expressed
ENSG00000109255.10	protein_coding	expressed
ENSG00000104946.9	protein_coding	expressed
ENSG00000277302.1	miRNA	non-expressed
ENSG00000233581.1	antisense	non-expressed
ENSG00000143603.17	protein_coding	expressed
ENSG00000163421.7	protein_coding	expressed
ENSG00000232979.1	processed_pseudogene	non-expressed
ENSG00000254792.1	processed_pseudogene	non-expressed
ENSG00000184209.14	protein_coding	expressed
ENSG00000136541.13	protein_coding	expressed
ENSG00000184281.13	protein_coding	expressed
ENSG00000199172.2	miRNA	expressed
ENSG00000281641.1	lincRNA	expressed
ENSG00000274023.1	sense_overlapping	non-expressed
ENSG00000249655.1	antisense	expressed
ENSG00000280318.1	TEC	non-expressed
ENSG00000253692.3	IG_C_pseudogene	non-expressed
ENSG00000142677.3	protein_coding	expressed
ENSG00000275174.1	snRNA	non-expressed
ENSG00000251725.1	miRNA	non-expressed
ENSG00000146223.13	protein_coding	expressed
ENSG00000248971.2	processed_pseudogene	expressed
ENSG00000260042.1	lincRNA	non-expressed
ENSG00000249927.1	processed_pseudogene	non-expressed
ENSG00000251275.1	unprocessed_pseudogene	non-expressed
ENSG00000244024.1	processed_pseudogene	non-expressed
ENSG00000236595.1	processed_pseudogene	expressed
ENSG00000279616.1	TEC	non-expressed
ENSG00000239718.1	antisense	non-expressed
ENSG00000251741.1	snRNA	non-expressed
ENSG00000100276.9	protein_coding	expressed
ENSG00000124782.18	protein_coding	expressed
ENSG00000151962.6	protein_coding	non-expressed
ENSG00000197866.3	unprocessed_pseudogene	non-expressed
ENSG00000168802.11	protein_coding	expressed
ENSG00000237235.2	TR_D_gene	non-expressed
ENSG00000007384.14	protein_coding	expressed
ENSG00000230123.1	unprocessed_pseudogene	non-expressed
ENSG00000232912.4	antisense	expressed
ENSG00000243772.5	protein_coding	expressed
ENSG00000115239.20	protein_coding	expressed
ENSG00000227212.3	processed_pseudogene	expressed
ENSG00000180626.9	protein_coding	expressed
ENSG00000248493.1	processed_pseudogene	non-expressed
ENSG00000240478.1	lincRNA	non-expressed
ENSG00000251078.1	processed_pseudogene	non-expressed
ENSG00000257890.1	lincRNA	non-expressed
ENSG00000258924.4	processed_transcript	non-expressed
ENSG00000207874.1	miRNA	non-expressed
ENSG00000151882.10	protein_coding	expressed
ENSG00000278479.1	miRNA	non-expressed
ENSG00000207180.1	snRNA	non-expressed
ENSG00000172179.10	protein_coding	expressed
ENSG00000256774.1	processed_pseudogene	non-expressed
ENSG00000143196.4	protein_coding	expressed
ENSG00000250043.1	lincRNA	non-expressed
ENSG00000207816.1	miRNA	non-expressed
ENSG00000267436.1	antisense	non-expressed
ENSG00000250166.2	lincRNA	non-expressed
ENSG00000267203.1	processed_pseudogene	expressed
ENSG00000281600.1	miRNA	non-expressed
ENSG00000267122.1	antisense	expressed
ENSG00000275994.1	snoRNA	non-expressed
ENSG00000198729.4	protein_coding	expressed
ENSG00000248690.5	antisense	expressed
ENSG00000279182.1	antisense	expressed
ENSG00000163273.3	protein_coding	expressed
ENSG00000200213.1	snRNA	non-expressed
ENSG00000232350.1	unprocessed_pseudogene	non-expressed
ENSG00000221469.1	miRNA	non-expressed
ENSG00000213822.6	protein_coding	expressed
ENSG00000279107.1	TEC	non-expressed
ENSG00000273180.1	lincRNA	non-expressed
ENSG00000272023.1	lincRNA	non-expressed
ENSG00000253685.1	unprocessed_pseudogene	non-expressed
ENSG00000199260.1	snRNA	non-expressed
ENSG00000180720.7	protein_coding	expressed
ENSG00000248191.1	processed_pseudogene	non-expressed
ENSG00000240373.1	antisense	expressed
ENSG00000180525.11	protein_coding	expressed
ENSG00000217159.2	processed_pseudogene	non-expressed
ENSG00000223275.1	miRNA	non-expressed
ENSG00000221633.2	snoRNA	non-expressed
ENSG00000281389.1	miRNA	non-expressed
ENSG00000249539.1	processed_pseudogene	expressed
ENSG00000131100.11	protein_coding	expressed
ENSG00000255171.4	lincRNA	non-expressed
ENSG00000066557.5	protein_coding	expressed
ENSG00000157064.9	protein_coding	expressed
ENSG00000225328.1	antisense	expressed
ENSG00000279377.1	TEC	expressed
ENSG00000258369.1	processed_pseudogene	non-expressed
ENSG00000147687.15	protein_coding	expressed
ENSG00000242924.1	lincRNA	non-expressed
ENSG00000206977.1	snoRNA	non-expressed
ENSG00000260563.3	lincRNA	expressed
ENSG00000263628.1	miRNA	non-expressed
ENSG00000186815.11	protein_coding	expressed
ENSG00000134240.10	protein_coding	expressed
ENSG00000269692.1	processed_pseudogene	non-expressed
ENSG00000226337.3	lincRNA	expressed
ENSG00000271088.1	processed_pseudogene	non-expressed
ENSG00000166266.12	protein_coding	expressed
ENSG00000225381.2	processed_pseudogene	non-expressed
ENSG00000159377.9	protein_coding	expressed
ENSG00000249312.1	processed_pseudogene	non-expressed
ENSG00000188372.13	protein_coding	expressed
ENSG00000230578.3	transcribed_unprocessed_pseudogene	non-expressed
ENSG00000227244.2	lincRNA	non-expressed
ENSG00000274363.1	lincRNA	expressed
ENSG00000234929.1	lincRNA	expressed
ENSG00000250594.2	processed_pseudogene	non-expressed
ENSG00000070729.12	protein_coding	expressed
ENSG00000115295.18	protein_coding	expressed
ENSG00000243352.3	misc_RNA	expressed
ENSG00000235264.1	processed_pseudogene	expressed
ENSG00000254342.1	processed_pseudogene	non-expressed
ENSG00000198920.8	protein_coding	expressed
ENSG00000202150.1	snRNA	non-expressed
ENSG00000244342.4	lincRNA	expressed
ENSG00000259149.1	lincRNA	non-expressed
ENSG00000212259.1	snRNA	non-expressed
ENSG00000215548.2	unprocessed_pseudogene	expressed
ENSG00000065328.15	protein_coding	expressed
ENSG00000222004.6	lincRNA	non-expressed
ENSG00000161091.11	protein_coding	expressed
ENSG00000263537.2	misc_RNA	non-expressed
ENSG00000238190.1	processed_pseudogene	non-expressed
ENSG00000223377.1	unprocessed_pseudogene	non-expressed
ENSG00000105248.14	protein_coding	expressed
ENSG00000146918.18	protein_coding	expressed
ENSG00000270826.1	processed_pseudogene	non-expressed
ENSG00000188801.9	processed_pseudogene	non-expressed
ENSG00000272109.1	antisense	expressed
ENSG00000242266.3	misc_RNA	non-expressed
ENSG00000248672.4	protein_coding	expressed
ENSG00000264007.1	sense_intronic	non-expressed
ENSG00000262500.1	processed_pseudogene	non-expressed
ENSG00000112394.15	protein_coding	expressed
ENSG00000279373.1	TEC	expressed
ENSG00000274150.1	unprocessed_pseudogene	expressed
ENSG00000255734.1	processed_pseudogene	expressed
ENSG00000260316.2	sense_intronic	expressed
ENSG00000186868.14	protein_coding	expressed
ENSG00000201713.1	rRNA	non-expressed
ENSG00000231046.1	antisense	non-expressed
ENSG00000280010.1	TEC	expressed
ENSG00000130312.5	protein_coding	expressed
ENSG00000223547.8	protein_coding	expressed
ENSG00000200377.1	snoRNA	non-expressed
ENSG00000258954.1	lincRNA	non-expressed
ENSG00000176438.11	protein_coding	expressed
ENSG00000174473.14	protein_coding	expressed
ENSG00000125818.16	protein_coding	expressed
ENSG00000223198.1	snRNA	expressed
ENSG00000104814.11	protein_coding	expressed
ENSG00000170590.7	lincRNA	non-expressed
ENSG00000108479.10	protein_coding	expressed
ENSG00000104870.11	protein_coding	expressed
ENSG00000181016.8	protein_coding	expressed
ENSG00000141034.8	protein_coding	expressed
ENSG00000277288.2	protein_coding	non-expressed
ENSG00000223403.3	lincRNA	expressed
ENSG00000253266.1	lincRNA	non-expressed
ENSG00000256092.2	lincRNA	expressed
ENSG00000212100.2	miRNA	non-expressed
ENSG00000239408.1	processed_pseudogene	non-expressed
ENSG00000268605.1	sense_intronic	non-expressed
ENSG00000268970.1	sense_intronic	expressed
ENSG00000245958.5	transcribed_unprocessed_pseudogene	expressed
ENSG00000212133.1	snRNA	non-expressed
ENSG00000232120.1	antisense	non-expressed
ENSG00000066739.10	protein_coding	expressed
ENSG00000244259.1	processed_pseudogene	non-expressed
ENSG00000236267.1	antisense	non-expressed
ENSG00000232537.1	lincRNA	non-expressed
ENSG00000181541.5	protein_coding	expressed
ENSG00000278531.1	unprocessed_pseudogene	expressed
ENSG00000264906.1	miRNA	non-expressed
ENSG00000213523.8	protein_coding	expressed
ENSG00000260662.2	processed_pseudogene	non-expressed
ENSG00000221471.1	miRNA	non-expressed
ENSG00000279410.1	TEC	expressed
ENSG00000200702.1	misc_RNA	non-expressed
ENSG00000245750.6	lincRNA	expressed
ENSG00000224351.2	processed_pseudogene	non-expressed
ENSG00000124493.12	protein_coding	expressed
ENSG00000249209.2	protein_coding	non-expressed
ENSG00000243063.1	IG_V_gene	expressed
ENSG00000231166.2	processed_pseudogene	non-expressed
ENSG00000249231.6	lincRNA	expressed
ENSG00000206712.1	snRNA	non-expressed
ENSG00000224813.2	transcribed_unprocessed_pseudogene	non-expressed
ENSG00000130707.16	protein_coding	expressed
ENSG00000261522.4	transcribed_unprocessed_pseudogene	non-expressed
ENSG00000227098.1	lincRNA	non-expressed
ENSG00000254987.1	lincRNA	non-expressed
ENSG00000210176.1	Mt_tRNA	expressed
ENSG00000259915.2	lincRNA	expressed
ENSG00000253540.4	transcribed_unprocessed_pseudogene	expressed
ENSG00000148908.13	protein_coding	expressed
ENSG00000271290.1	processed_pseudogene	non-expressed
ENSG00000276168.1	misc_RNA	non-expressed
ENSG00000259036.1	antisense	non-expressed
ENSG00000221421.1	miRNA	non-expressed
ENSG00000162692.9	protein_coding	expressed
ENSG00000170379.18	protein_coding	expressed
ENSG00000254175.1	IG_V_pseudogene	non-expressed
ENSG00000215802.3	transcribed_processed_pseudogene	non-expressed
ENSG00000244703.3	unprocessed_pseudogene	non-expressed
ENSG00000274385.1	snRNA	non-expressed
ENSG00000112715.19	protein_coding	expressed
ENSG00000096996.14	protein_coding	expressed
ENSG00000021355.11	protein_coding	expressed
ENSG00000230099.2	TR_V_gene	expressed
ENSG00000249406.1	lincRNA	non-expressed
ENSG00000141098.11	protein_coding	expressed
ENSG00000199620.1	rRNA	non-expressed
ENSG00000272282.1	lincRNA	expressed
ENSG00000182511.10	protein_coding	expressed
ENSG00000258892.1	processed_transcript	non-expressed
ENSG00000250896.1	processed_pseudogene	expressed
ENSG00000237705.1	antisense	non-expressed
ENSG00000216020.2	miRNA	non-expressed
ENSG00000268651.2	protein_coding	non-expressed
ENSG00000250492.1	processed_pseudogene	expressed
ENSG00000227971.1	processed_pseudogene	non-expressed
ENSG00000162374.15	protein_coding	expressed
ENSG00000147081.13	protein_coding	expressed
ENSG00000267253.1	processed_pseudogene	expressed
ENSG00000264251.2	misc_RNA	non-expressed
ENSG00000201178.1	misc_RNA	non-expressed
ENSG00000280861.1	miRNA	non-expressed
ENSG00000280021.1	polymorphic_pseudogene	non-expressed
ENSG00000139970.15	protein_coding	expressed
ENSG00000105427.8	protein_coding	expressed
ENSG00000204653.8	protein_coding	expressed
ENSG00000244642.3	misc_RNA	expressed
ENSG00000204983.11	protein_coding	expressed
ENSG00000255054.3	protein_coding	non-expressed
ENSG00000222276.1	snRNA	non-expressed
ENSG00000151364.14	protein_coding	expressed
ENSG00000206887.1	snRNA	non-expressed
ENSG00000260152.2	processed_pseudogene	non-expressed
ENSG00000143363.14	protein_coding	expressed
ENSG00000118046.13	protein_coding	expressed
ENSG00000240405.4	lincRNA	non-expressed
ENSG00000257899.1	processed_pseudogene	non-expressed
ENSG00000204949.7	antisense	expressed
ENSG00000277460.1	misc_RNA	non-expressed
ENSG00000254794.1	processed_pseudogene	non-expressed
ENSG00000154856.11	protein_coding	expressed
ENSG00000186174.11	protein_coding	expressed
ENSG00000199698.1	misc_RNA	non-expressed
ENSG00000258028.1	lincRNA	non-expressed
ENSG00000171234.12	protein_coding	expressed
ENSG00000166949.14	protein_coding	expressed
ENSG00000255361.1	processed_pseudogene	non-expressed
ENSG00000085274.14	protein_coding	expressed
ENSG00000259598.1	antisense	non-expressed
ENSG00000227304.3	transcribed_processed_pseudogene	expressed
ENSG00000223265.1	snRNA	non-expressed
ENSG00000199593.1	snoRNA	non-expressed
ENSG00000266595.1	miRNA	non-expressed
ENSG00000115568.14	protein_coding	expressed
ENSG00000261778.1	processed_pseudogene	non-expressed
ENSG00000147421.16	protein_coding	expressed
ENSG00000250983.1	processed_pseudogene	non-expressed
ENSG00000264679.1	miRNA	non-expressed
ENSG00000146618.3	protein_coding	non-expressed
ENSG00000254812.1	antisense	expressed
ENSG00000205593.10	protein_coding	expressed
ENSG00000184110.13	protein_coding	expressed
ENSG00000271848.1	antisense	non-expressed
ENSG00000280687.1	miRNA	non-expressed
ENSG00000236896.1	antisense	expressed
ENSG00000137872.14	protein_coding	expressed
ENSG00000278215.1	processed_pseudogene	non-expressed
ENSG00000270961.1	IG_D_gene	non-expressed
ENSG00000145354.8	protein_coding	expressed
ENSG00000265736.1	miRNA	non-expressed
ENSG00000126337.12	protein_coding	expressed
ENSG00000153266.11	protein_coding	expressed
ENSG00000272478.1	antisense	non-expressed
ENSG00000242317.1	lincRNA	non-expressed
ENSG00000276007.1	sense_intronic	expressed
ENSG00000158526.7	protein_coding	expressed
ENSG00000253844.1	lincRNA	expressed
ENSG00000279099.1	TEC	non-expressed
ENSG00000275265.1	lincRNA	non-expressed
ENSG00000252342.1	rRNA	non-expressed
ENSG00000265777.2	misc_RNA	non-expressed
ENSG00000262899.1	antisense	non-expressed
ENSG00000105997.21	protein_coding	expressed
ENSG00000185837.3	antisense	expressed
ENSG00000137522.16	protein_coding	expressed
ENSG00000234838.3	processed_pseudogene	non-expressed
ENSG00000227217.1	antisense	non-expressed
ENSG00000221551.1	miRNA	non-expressed
ENSG00000253935.1	IG_V_pseudogene	non-expressed
ENSG00000251889.1	snRNA	non-expressed
ENSG00000257831.1	antisense	expressed
ENSG00000139209.14	protein_coding	expressed
ENSG00000248870.1	lincRNA	non-expressed
ENSG00000261760.5	lincRNA	expressed
ENSG00000152952.10	protein_coding	expressed
ENSG00000270456.1	processed_pseudogene	non-expressed
ENSG00000076344.14	protein_coding	expressed
ENSG00000206585.1	snRNA	expressed
ENSG00000272092.1	lincRNA	expressed
ENSG00000133863.5	protein_coding	non-expressed
ENSG00000137941.15	protein_coding	expressed
ENSG00000165553.4	protein_coding	expressed
ENSG00000276092.1	sense_intronic	non-expressed
ENSG00000146232.13	protein_coding	expressed
ENSG00000233236.1	lincRNA	non-expressed
ENSG00000165588.15	protein_coding	non-expressed
ENSG00000087053.17	protein_coding	expressed
ENSG00000250946.2	unprocessed_pseudogene	non-expressed
ENSG00000236709.1	sense_intronic	non-expressed
ENSG00000168894.8	protein_coding	expressed
ENSG00000267106.4	processed_transcript	expressed
ENSG00000251087.3	unprocessed_pseudogene	expressed
ENSG00000165029.14	protein_coding	expressed
ENSG00000248929.1	processed_pseudogene	non-expressed
ENSG00000243704.3	misc_RNA	non-expressed
ENSG00000198284.8	transcribed_processed_pseudogene	non-expressed
ENSG00000250735.4	lincRNA	expressed
ENSG00000268922.1	processed_pseudogene	non-expressed
ENSG00000274010.1	processed_pseudogene	non-expressed
ENSG00000277880.1	TR_V_gene	non-expressed
ENSG00000265357.1	miRNA	non-expressed
ENSG00000255139.1	antisense	expressed
ENSG00000235503.2	antisense	non-expressed
ENSG00000158258.14	protein_coding	expressed
ENSG00000165997.4	protein_coding	expressed
ENSG00000258553.4	antisense	non-expressed
ENSG00000239354.1	processed_pseudogene	non-expressed
ENSG00000213140.3	processed_pseudogene	non-expressed
ENSG00000241269.1	antisense	expressed
ENSG00000203620.2	lincRNA	non-expressed
ENSG00000229951.4	antisense	expressed
ENSG00000185418.14	protein_coding	expressed
ENSG00000157992.11	protein_coding	expressed
ENSG00000200525.1	snRNA	non-expressed
ENSG00000007350.15	protein_coding	expressed
ENSG00000234015.1	lincRNA	non-expressed
ENSG00000251306.1	processed_pseudogene	non-expressed
ENSG00000279012.1	polymorphic_pseudogene	non-expressed
ENSG00000255394.4	lincRNA	expressed
ENSG00000266176.1	lincRNA	expressed
ENSG00000217377.1	processed_pseudogene	non-expressed
ENSG00000227139.1	lincRNA	non-expressed
ENSG00000225582.1	lincRNA	non-expressed
ENSG00000137166.13	protein_coding	expressed
ENSG00000228004.1	processed_pseudogene	non-expressed
ENSG00000251369.7	protein_coding	expressed
ENSG00000261320.1	lincRNA	expressed
ENSG00000143353.10	protein_coding	expressed
ENSG00000265681.5	protein_coding	expressed
ENSG00000254002.1	lincRNA	non-expressed
ENSG00000117362.11	protein_coding	expressed
ENSG00000202270.1	snoRNA	non-expressed
ENSG00000263381.1	miRNA	non-expressed
ENSG00000263594.1	lincRNA	non-expressed
ENSG00000130158.12	protein_coding	expressed
ENSG00000275124.1	miRNA	non-expressed
ENSG00000276029.1	miRNA	non-expressed
ENSG00000211691.2	TR_J_gene	non-expressed
ENSG00000252943.1	snRNA	non-expressed
ENSG00000214883.4	unprocessed_pseudogene	non-expressed
ENSG00000252768.1	snRNA	non-expressed
ENSG00000201554.1	misc_RNA	non-expressed
ENSG00000130561.15	protein_coding	expressed
ENSG00000249558.1	processed_pseudogene	non-expressed
ENSG00000267205.1	antisense	non-expressed
ENSG00000255349.1	unprocessed_pseudogene	non-expressed
ENSG00000108342.11	protein_coding	expressed
ENSG00000214207.2	processed_pseudogene	expressed
ENSG00000102977.12	protein_coding	expressed
ENSG00000223500.1	processed_pseudogene	non-expressed
ENSG00000100197.19	protein_coding	expressed
ENSG00000204662.2	unprocessed_pseudogene	non-expressed
ENSG00000265137.2	miRNA	non-expressed
ENSG00000132437.16	protein_coding	expressed
ENSG00000226486.1	lincRNA	non-expressed
ENSG00000126214.19	protein_coding	expressed
ENSG00000206503.10	protein_coding	expressed
ENSG00000163606.9	protein_coding	expressed
ENSG00000249156.1	processed_pseudogene	non-expressed
ENSG00000239827.7	transcribed_unprocessed_pseudogene	expressed
ENSG00000232197.1	antisense	non-expressed
ENSG00000249639.1	antisense	non-expressed
ENSG00000239168.1	snRNA	non-expressed
ENSG00000005059.14	protein_coding	expressed
ENSG00000180116.14	protein_coding	non-expressed
ENSG00000238393.1	miRNA	non-expressed
ENSG00000264647.1	antisense	expressed
ENSG00000226801.2	processed_pseudogene	non-expressed
ENSG00000199038.1	miRNA	expressed
ENSG00000230289.1	antisense	expressed
ENSG00000147383.9	protein_coding	expressed
ENSG00000229247.2	processed_pseudogene	non-expressed
ENSG00000218536.1	processed_pseudogene	non-expressed
ENSG00000206896.1	snRNA	non-expressed
ENSG00000264484.2	misc_RNA	non-expressed
ENSG00000133475.15	protein_coding	non-expressed
ENSG00000168374.9	protein_coding	expressed
ENSG00000067225.16	protein_coding	expressed
ENSG00000224812.2	antisense	expressed
ENSG00000239185.1	snRNA	non-expressed
ENSG00000171792.9	protein_coding	expressed
ENSG00000252412.1	misc_RNA	expressed
ENSG00000272510.1	antisense	expressed
ENSG00000197363.8	protein_coding	expressed
ENSG00000221525.1	miRNA	non-expressed
ENSG00000268282.1	processed_pseudogene	expressed
ENSG00000247556.5	processed_transcript	expressed
ENSG00000252362.1	snRNA	non-expressed
ENSG00000235518.2	lincRNA	non-expressed
ENSG00000224516.4	antisense	non-expressed
ENSG00000223554.1	lincRNA	non-expressed
ENSG00000234969.1	processed_pseudogene	expressed
ENSG00000234730.1	lincRNA	non-expressed
ENSG00000231113.2	antisense	expressed
ENSG00000223544.1	unprocessed_pseudogene	non-expressed
ENSG00000083454.20	protein_coding	expressed
ENSG00000254172.1	snRNA	non-expressed
ENSG00000277590.1	miRNA	non-expressed
ENSG00000266160.2	misc_RNA	non-expressed
ENSG00000233928.4	lincRNA	non-expressed
ENSG00000201586.1	snRNA	non-expressed
ENSG00000155918.6	protein_coding	expressed
ENSG00000106341.9	protein_coding	non-expressed
ENSG00000250506.5	protein_coding	expressed
ENSG00000258204.1	processed_pseudogene	non-expressed
ENSG00000182963.8	protein_coding	expressed
ENSG00000244456.2	transcribed_unprocessed_pseudogene	non-expressed
ENSG00000274985.1	unprocessed_pseudogene	non-expressed
ENSG00000242320.2	processed_pseudogene	non-expressed
ENSG00000278612.1	miRNA	non-expressed
ENSG00000223488.2	processed_pseudogene	non-expressed
ENSG00000253576.1	antisense	non-expressed
ENSG00000202410.1	misc_RNA	non-expressed
ENSG00000272568.4	antisense	expressed
ENSG00000251371.1	lincRNA	non-expressed
ENSG00000228100.1	lincRNA	non-expressed
ENSG00000235199.1	processed_pseudogene	non-expressed
ENSG00000255163.1	processed_pseudogene	non-expressed
ENSG00000234172.1	lincRNA	non-expressed
ENSG00000238145.2	processed_pseudogene	non-expressed
ENSG00000270531.1	processed_pseudogene	non-expressed
ENSG00000254529.1	unprocessed_pseudogene	non-expressed
ENSG00000070669.15	protein_coding	expressed
ENSG00000254174.1	IG_V_pseudogene	expressed
ENSG00000261066.1	lincRNA	non-expressed
ENSG00000253663.1	processed_pseudogene	non-expressed
ENSG00000255257.1	lincRNA	non-expressed
ENSG00000225003.1	unprocessed_pseudogene	non-expressed
ENSG00000243725.5	protein_coding	expressed
ENSG00000213152.5	processed_pseudogene	expressed
ENSG00000231353.1	unprocessed_pseudogene	non-expressed
ENSG00000229159.1	unprocessed_pseudogene	non-expressed
ENSG00000280581.1	misc_RNA	non-expressed
ENSG00000259255.1	lincRNA	non-expressed
ENSG00000234634.1	lincRNA	non-expressed
ENSG00000226093.1	processed_pseudogene	non-expressed
ENSG00000104731.12	protein_coding	expressed
ENSG00000137574.9	protein_coding	expressed
ENSG00000266952.1	lincRNA	non-expressed
ENSG00000144843.10	protein_coding	expressed
ENSG00000226970.2	processed_pseudogene	expressed
ENSG00000215127.6	transcribed_processed_pseudogene	non-expressed
ENSG00000254781.1	processed_pseudogene	non-expressed
ENSG00000185722.15	protein_coding	expressed
ENSG00000265865.1	miRNA	non-expressed
ENSG00000279283.1	TEC	expressed
ENSG00000005001.8	protein_coding	expressed
ENSG00000235352.1	processed_pseudogene	non-expressed
ENSG00000230498.1	antisense	expressed
ENSG00000254469.6	protein_coding	expressed
ENSG00000080709.13	protein_coding	expressed
ENSG00000009694.12	protein_coding	expressed
ENSG00000083457.10	protein_coding	expressed
ENSG00000260528.3	lincRNA	expressed
ENSG00000234861.2	processed_pseudogene	non-expressed
ENSG00000174145.7	protein_coding	expressed
ENSG00000131467.9	protein_coding	expressed
ENSG00000224686.1	processed_pseudogene	non-expressed
ENSG00000256783.1	lincRNA	non-expressed
ENSG00000273653.1	miRNA	non-expressed
ENSG00000280007.1	antisense	expressed
ENSG00000173465.6	protein_coding	expressed
ENSG00000260758.1	lincRNA	non-expressed
ENSG00000164188.7	protein_coding	expressed
ENSG00000102524.10	protein_coding	expressed
ENSG00000227203.3	processed_pseudogene	expressed
ENSG00000225213.2	sense_intronic	expressed
ENSG00000281639.1	miRNA	non-expressed
ENSG00000237171.1	unprocessed_pseudogene	non-expressed
ENSG00000250130.1	processed_pseudogene	expressed
ENSG00000112159.10	protein_coding	expressed
ENSG00000270937.1	lincRNA	expressed
ENSG00000221852.4	protein_coding	non-expressed
ENSG00000256238.1	processed_pseudogene	expressed
ENSG00000252157.1	snRNA	non-expressed
ENSG00000262031.1	lincRNA	non-expressed
ENSG00000254842.5	lincRNA	expressed
ENSG00000281420.1	pseudogene	expressed
ENSG00000225822.4	antisense	non-expressed
ENSG00000260187.1	transcribed_processed_pseudogene	non-expressed
ENSG00000015475.17	protein_coding	expressed
ENSG00000157870.13	protein_coding	expressed
ENSG00000184785.5	protein_coding	expressed
ENSG00000096968.11	protein_coding	expressed
ENSG00000253331.1	lincRNA	non-expressed
ENSG00000262248.1	processed_pseudogene	expressed
ENSG00000197462.3	lincRNA	non-expressed
ENSG00000100749.6	protein_coding	expressed
ENSG00000154229.10	protein_coding	expressed
ENSG00000200783.1	misc_RNA	non-expressed
ENSG00000166478.8	protein_coding	expressed
ENSG00000278878.1	lincRNA	non-expressed
ENSG00000258290.1	processed_pseudogene	non-expressed
ENSG00000180340.6	protein_coding	expressed
ENSG00000274933.3	protein_coding	non-expressed
ENSG00000257231.1	processed_pseudogene	non-expressed
ENSG00000263749.1	processed_pseudogene	non-expressed
ENSG00000109270.11	protein_coding	expressed
ENSG00000268050.2	antisense	non-expressed
ENSG00000236471.1	lincRNA	non-expressed
ENSG00000196468.7	protein_coding	non-expressed
ENSG00000198643.5	protein_coding	expressed
ENSG00000233593.5	lincRNA	expressed
ENSG00000232429.3	processed_pseudogene	expressed
ENSG00000221662.1	miRNA	non-expressed
ENSG00000148843.12	protein_coding	expressed
ENSG00000237190.3	protein_coding	expressed
ENSG00000254734.1	lincRNA	non-expressed
ENSG00000198168.7	protein_coding	expressed
ENSG00000116161.16	protein_coding	expressed
ENSG00000116748.18	protein_coding	expressed
ENSG00000249601.2	lincRNA	non-expressed
ENSG00000242829.1	processed_pseudogene	non-expressed
ENSG00000280135.1	TEC	expressed
ENSG00000277613.1	snRNA	non-expressed
ENSG00000265484.1	lincRNA	non-expressed
ENSG00000242522.1	antisense	non-expressed
ENSG00000249026.2	processed_pseudogene	expressed
ENSG00000269186.1	lincRNA	expressed
ENSG00000241550.3	misc_RNA	non-expressed
ENSG00000212383.1	snoRNA	non-expressed
ENSG00000277067.3	lincRNA	non-expressed
ENSG00000259645.1	sense_intronic	expressed
ENSG00000183309.10	protein_coding	expressed
ENSG00000253889.1	IG_V_pseudogene	non-expressed
ENSG00000106245.8	protein_coding	expressed
ENSG00000200170.1	misc_RNA	expressed
ENSG00000175279.20	protein_coding	expressed
ENSG00000216938.3	processed_pseudogene	expressed
ENSG00000236468.1	processed_pseudogene	expressed
ENSG00000110107.7	protein_coding	expressed
ENSG00000165591.6	protein_coding	expressed
ENSG00000224765.1	antisense	non-expressed
ENSG00000275413.1	antisense	expressed
ENSG00000259696.2	processed_pseudogene	non-expressed
ENSG00000253808.1	IG_V_pseudogene	non-expressed
ENSG00000168067.10	protein_coding	expressed
ENSG00000167100.13	protein_coding	expressed
ENSG00000251602.5	antisense	expressed
ENSG00000236978.1	processed_pseudogene	non-expressed
ENSG00000145824.11	protein_coding	expressed
ENSG00000102195.8	protein_coding	non-expressed
ENSG00000228084.1	antisense	expressed
ENSG00000276093.1	lincRNA	non-expressed
ENSG00000248559.1	antisense	expressed
ENSG00000124181.13	protein_coding	expressed
ENSG00000196274.5	misc_RNA	expressed
ENSG00000029364.10	protein_coding	expressed
ENSG00000254931.2	processed_pseudogene	non-expressed
ENSG00000230239.1	lincRNA	non-expressed
ENSG00000213070.3	processed_pseudogene	expressed
ENSG00000263220.1	antisense	expressed
ENSG00000121388.5	unprocessed_pseudogene	non-expressed
ENSG00000169062.13	protein_coding	expressed
ENSG00000273450.1	antisense	expressed
ENSG00000207933.2	miRNA	non-expressed
ENSG00000274343.1	processed_pseudogene	non-expressed
ENSG00000233259.4	processed_pseudogene	non-expressed
ENSG00000120253.12	protein_coding	expressed
ENSG00000235089.1	processed_pseudogene	expressed
ENSG00000251517.1	lincRNA	expressed
ENSG00000099889.12	protein_coding	expressed
ENSG00000140090.16	protein_coding	expressed
ENSG00000241622.1	processed_pseudogene	non-expressed
ENSG00000150526.10	protein_coding	expressed
ENSG00000278764.1	misc_RNA	non-expressed
ENSG00000106628.9	protein_coding	expressed
ENSG00000259708.1	antisense	non-expressed
ENSG00000272368.2	antisense	expressed
ENSG00000103534.15	protein_coding	expressed
ENSG00000198042.9	protein_coding	expressed
ENSG00000259602.1	antisense	non-expressed
ENSG00000228430.7	lincRNA	non-expressed
ENSG00000239911.2	antisense	expressed
ENSG00000139289.12	protein_coding	expressed
ENSG00000197171.5	unprocessed_pseudogene	non-expressed
ENSG00000231219.1	unprocessed_pseudogene	non-expressed
ENSG00000238088.1	unprocessed_pseudogene	non-expressed
ENSG00000250722.4	protein_coding	expressed
ENSG00000226833.4	antisense	expressed
ENSG00000257042.1	antisense	non-expressed
ENSG00000239555.3	misc_RNA	non-expressed
ENSG00000072832.13	protein_coding	expressed
ENSG00000197050.9	protein_coding	expressed
ENSG00000267659.4	lincRNA	non-expressed
ENSG00000263809.1	protein_coding	expressed
ENSG00000279671.1	TEC	non-expressed
ENSG00000280396.1	TEC	non-expressed
ENSG00000177352.9	protein_coding	expressed
ENSG00000273096.1	sense_intronic	expressed
ENSG00000102007.9	protein_coding	expressed
ENSG00000269321.1	antisense	non-expressed
ENSG00000226643.2	lincRNA	non-expressed
ENSG00000231987.1	lincRNA	non-expressed
ENSG00000152784.14	protein_coding	expressed
ENSG00000228700.1	processed_pseudogene	non-expressed
ENSG00000254705.1	antisense	non-expressed
ENSG00000262470.2	transcribed_processed_pseudogene	non-expressed
ENSG00000265975.1	lincRNA	expressed
ENSG00000249722.1	lincRNA	non-expressed
ENSG00000230162.1	unprocessed_pseudogene	expressed
ENSG00000176160.8	protein_coding	expressed
ENSG00000223402.1	processed_pseudogene	non-expressed
ENSG00000271532.1	processed_pseudogene	non-expressed
ENSG00000169139.10	protein_coding	expressed
ENSG00000273170.4	protein_coding	expressed
ENSG00000199158.1	miRNA	non-expressed
ENSG00000232442.1	antisense	expressed
ENSG00000231873.1	lincRNA	non-expressed
ENSG00000164898.11	protein_coding	expressed
ENSG00000161800.11	protein_coding	expressed
ENSG00000253717.1	lincRNA	non-expressed
ENSG00000200139.1	snRNA	non-expressed
ENSG00000163945.14	protein_coding	expressed
ENSG00000259482.1	antisense	non-expressed
ENSG00000251218.1	lincRNA	non-expressed
ENSG00000159496.13	protein_coding	expressed
ENSG00000233308.1	antisense	expressed
ENSG00000270379.4	protein_coding	expressed
ENSG00000155052.14	protein_coding	expressed
ENSG00000171757.14	protein_coding	expressed
ENSG00000222631.3	miRNA	non-expressed
ENSG00000260185.1	antisense	non-expressed
ENSG00000262601.1	lincRNA	expressed
ENSG00000243832.1	lincRNA	expressed
ENSG00000273699.1	miRNA	non-expressed
ENSG00000256947.1	antisense	non-expressed
ENSG00000270890.1	processed_pseudogene	expressed
ENSG00000276527.1	lincRNA	non-expressed
ENSG00000225761.1	sense_intronic	expressed
ENSG00000102595.17	protein_coding	expressed
ENSG00000259037.1	antisense	non-expressed
ENSG00000134207.13	protein_coding	expressed
ENSG00000230376.1	processed_pseudogene	non-expressed
ENSG00000170214.3	protein_coding	expressed
ENSG00000227361.1	processed_pseudogene	expressed
ENSG00000198723.9	protein_coding	expressed
ENSG00000100316.14	protein_coding	expressed
ENSG00000236184.1	processed_pseudogene	expressed
ENSG00000261191.1	antisense	non-expressed
ENSG00000080007.7	protein_coding	expressed
ENSG00000274934.1	misc_RNA	non-expressed
ENSG00000120868.12	protein_coding	expressed
ENSG00000233817.1	lincRNA	expressed
ENSG00000275656.1	misc_RNA	non-expressed
ENSG00000252133.1	snoRNA	non-expressed
ENSG00000230734.1	processed_pseudogene	expressed
ENSG00000262158.1	unprocessed_pseudogene	non-expressed
ENSG00000234740.1	sense_intronic	non-expressed
ENSG00000196850.5	protein_coding	expressed
ENSG00000166848.5	protein_coding	expressed
ENSG00000224520.2	processed_pseudogene	expressed
ENSG00000201778.1	misc_RNA	non-expressed
ENSG00000266006.1	miRNA	non-expressed
ENSG00000258781.2	unprocessed_pseudogene	non-expressed
ENSG00000240032.1	antisense	expressed
ENSG00000237609.1	lincRNA	expressed
ENSG00000272944.1	antisense	expressed
ENSG00000174485.13	protein_coding	expressed
ENSG00000176232.10	unprocessed_pseudogene	non-expressed
ENSG00000226193.1	antisense	non-expressed
ENSG00000268296.1	lincRNA	non-expressed
ENSG00000272788.1	sense_intronic	expressed
ENSG00000228958.1	processed_pseudogene	non-expressed
ENSG00000239620.1	processed_pseudogene	non-expressed
ENSG00000274631.1	processed_pseudogene	non-expressed
ENSG00000232855.5	lincRNA	expressed
ENSG00000249437.6	protein_coding	expressed
ENSG00000152213.3	protein_coding	expressed
ENSG00000253055.1	rRNA	non-expressed
ENSG00000232545.1	sense_intronic	expressed
ENSG00000266288.1	lincRNA	non-expressed
ENSG00000198825.10	protein_coding	expressed
ENSG00000279123.1	TEC	expressed
ENSG00000277662.1	sense_intronic	expressed
ENSG00000223866.1	processed_pseudogene	non-expressed
ENSG00000225572.1	antisense	non-expressed
ENSG00000204344.13	protein_coding	expressed
ENSG00000253441.1	IG_V_pseudogene	expressed
ENSG00000186469.7	protein_coding	expressed
ENSG00000270696.1	antisense	expressed
ENSG00000234224.2	protein_coding	expressed
ENSG00000216676.2	processed_pseudogene	expressed
ENSG00000212561.1	snRNA	non-expressed
ENSG00000264658.1	miRNA	non-expressed
ENSG00000253956.1	lincRNA	non-expressed
ENSG00000251287.7	protein_coding	expressed
ENSG00000167701.12	protein_coding	expressed
ENSG00000204933.3	unprocessed_pseudogene	expressed
ENSG00000268505.1	lincRNA	expressed
ENSG00000259268.1	lincRNA	non-expressed
ENSG00000280799.1	unprocessed_pseudogene	non-expressed
ENSG00000276564.1	lincRNA	expressed
ENSG00000264911.1	processed_pseudogene	non-expressed
ENSG00000072135.11	protein_coding	expressed
ENSG00000110321.14	protein_coding	expressed
ENSG00000079739.14	protein_coding	expressed
ENSG00000019991.14	protein_coding	expressed
ENSG00000183668.16	protein_coding	non-expressed
ENSG00000154146.11	protein_coding	expressed
ENSG00000254973.1	lincRNA	expressed
ENSG00000174123.9	protein_coding	expressed
ENSG00000221074.1	miRNA	non-expressed
ENSG00000214903.4	processed_pseudogene	non-expressed
ENSG00000232627.1	processed_pseudogene	non-expressed
ENSG00000254017.1	IG_C_pseudogene	expressed
ENSG00000126264.8	protein_coding	expressed
ENSG00000214878.2	processed_pseudogene	non-expressed
ENSG00000224809.2	processed_pseudogene	non-expressed
ENSG00000180011.6	protein_coding	expressed
ENSG00000265737.1	antisense	expressed
ENSG00000279054.1	protein_coding	non-expressed
ENSG00000122484.8	protein_coding	expressed
ENSG00000264500.1	miRNA	non-expressed
ENSG00000279106.1	TEC	expressed
ENSG00000200040.1	misc_RNA	non-expressed
ENSG00000241654.1	processed_pseudogene	non-expressed
ENSG00000279604.1	TEC	non-expressed
ENSG00000136059.13	protein_coding	expressed
ENSG00000230484.2	unitary_pseudogene	non-expressed
ENSG00000233262.1	antisense	non-expressed
ENSG00000266203.1	miRNA	non-expressed
ENSG00000248551.1	lincRNA	non-expressed
ENSG00000267137.1	antisense	non-expressed
ENSG00000253526.1	lincRNA	non-expressed
ENSG00000215845.9	protein_coding	expressed
ENSG00000276252.1	miRNA	non-expressed
ENSG00000256011.1	antisense	non-expressed
ENSG00000223273.1	misc_RNA	non-expressed
ENSG00000276056.1	miRNA	non-expressed
ENSG00000178750.2	protein_coding	expressed
ENSG00000235843.1	antisense	expressed
ENSG00000258845.1	lincRNA	non-expressed
ENSG00000224781.1	processed_pseudogene	expressed
ENSG00000228056.3	processed_pseudogene	non-expressed
ENSG00000280731.1	miRNA	non-expressed
ENSG00000188153.11	protein_coding	expressed
ENSG00000255776.1	processed_pseudogene	non-expressed
ENSG00000234427.1	lincRNA	non-expressed
ENSG00000279717.1	TEC	non-expressed
ENSG00000264288.1	miRNA	non-expressed
ENSG00000101470.8	protein_coding	expressed
ENSG00000232671.4	antisense	expressed
ENSG00000177023.2	protein_coding	non-expressed
ENSG00000247595.2	processed_transcript	expressed
ENSG00000220157.4	processed_pseudogene	expressed
ENSG00000270435.1	processed_pseudogene	non-expressed
ENSG00000185825.14	protein_coding	expressed
ENSG00000053501.11	protein_coding	expressed
ENSG00000253768.1	lincRNA	non-expressed
ENSG00000267653.1	lincRNA	expressed
ENSG00000196248.4	protein_coding	non-expressed
ENSG00000111049.3	protein_coding	non-expressed
ENSG00000204832.8	antisense	expressed
ENSG00000258380.1	antisense	non-expressed
ENSG00000106723.15	protein_coding	expressed
ENSG00000255067.1	sense_intronic	non-expressed
ENSG00000270293.1	processed_pseudogene	non-expressed
ENSG00000140107.10	protein_coding	expressed
ENSG00000221065.1	miRNA	non-expressed
ENSG00000116525.12	protein_coding	expressed
ENSG00000206800.1	misc_RNA	non-expressed
ENSG00000220537.1	processed_pseudogene	non-expressed
ENSG00000279200.1	TEC	non-expressed
ENSG00000254858.8	protein_coding	expressed
ENSG00000200645.1	snRNA	non-expressed
ENSG00000165917.8	protein_coding	expressed
ENSG00000160766.13	transcribed_unprocessed_pseudogene	expressed
ENSG00000199480.1	rRNA	non-expressed
ENSG00000167165.17	protein_coding	expressed
ENSG00000153291.14	protein_coding	expressed
ENSG00000252978.1	misc_RNA	non-expressed
ENSG00000273763.1	processed_pseudogene	expressed
ENSG00000270526.1	processed_pseudogene	non-expressed
ENSG00000265493.1	miRNA	non-expressed
ENSG00000177669.3	protein_coding	expressed
ENSG00000198298.11	protein_coding	expressed
ENSG00000240970.1	processed_pseudogene	expressed
ENSG00000180139.11	antisense	expressed
ENSG00000120471.13	protein_coding	expressed
ENSG00000277127.1	misc_RNA	non-expressed
ENSG00000252854.1	misc_RNA	non-expressed
ENSG00000224537.1	unprocessed_pseudogene	expressed
ENSG00000120306.8	protein_coding	expressed
ENSG00000270911.1	processed_pseudogene	non-expressed
ENSG00000167088.9	protein_coding	expressed
ENSG00000204887.4	protein_coding	non-expressed
ENSG00000264693.1	lincRNA	non-expressed
ENSG00000074695.5	protein_coding	expressed
ENSG00000214255.5	processed_pseudogene	expressed
ENSG00000092377.12	protein_coding	expressed
ENSG00000180767.8	protein_coding	expressed
ENSG00000214176.8	transcribed_unprocessed_pseudogene	expressed
ENSG00000263307.1	antisense	expressed
ENSG00000273295.1	lincRNA	expressed
ENSG00000173093.11	protein_coding	non-expressed
ENSG00000089693.9	protein_coding	expressed
ENSG00000280194.1	TEC	expressed
ENSG00000088970.14	protein_coding	expressed
ENSG00000183876.8	protein_coding	expressed
ENSG00000264779.1	miRNA	non-expressed
ENSG00000252601.1	snoRNA	non-expressed
ENSG00000252357.1	misc_RNA	non-expressed
ENSG00000148925.9	protein_coding	expressed
ENSG00000230476.1	unprocessed_pseudogene	non-expressed
ENSG00000213213.12	protein_coding	expressed
ENSG00000104093.12	protein_coding	expressed
ENSG00000251435.1	processed_pseudogene	non-expressed
ENSG00000225764.1	antisense	non-expressed
ENSG00000255976.1	processed_pseudogene	non-expressed
ENSG00000280063.1	TEC	expressed
ENSG00000233869.1	processed_pseudogene	non-expressed
ENSG00000264429.1	miRNA	non-expressed
ENSG00000185304.13	protein_coding	expressed
ENSG00000207116.1	snRNA	non-expressed
ENSG00000251035.1	processed_pseudogene	non-expressed
ENSG00000074266.16	protein_coding	expressed
ENSG00000156574.8	protein_coding	expressed
ENSG00000248256.1	antisense	expressed
ENSG00000214702.6	unprocessed_pseudogene	non-expressed
ENSG00000266481.1	miRNA	non-expressed
ENSG00000232949.1	antisense	non-expressed
ENSG00000115233.10	protein_coding	expressed
ENSG00000214290.6	protein_coding	expressed
ENSG00000270661.1	lincRNA	expressed
ENSG00000211866.1	TR_J_gene	non-expressed
ENSG00000239605.7	protein_coding	expressed
ENSG00000259660.2	transcribed_unprocessed_pseudogene	expressed
ENSG00000197838.4	protein_coding	non-expressed
ENSG00000127946.15	protein_coding	expressed
ENSG00000197576.12	protein_coding	expressed
ENSG00000248533.1	lincRNA	non-expressed
ENSG00000270139.1	lincRNA	non-expressed
ENSG00000271046.1	lincRNA	expressed
ENSG00000053918.14	protein_coding	expressed
ENSG00000226461.3	unprocessed_pseudogene	non-expressed
ENSG00000215183.4	protein_coding	non-expressed
ENSG00000258308.4	lincRNA	non-expressed
ENSG00000089006.15	protein_coding	expressed
ENSG00000234262.1	unprocessed_pseudogene	non-expressed
ENSG00000277939.1	miRNA	non-expressed
ENSG00000200887.1	snRNA	non-expressed
ENSG00000149633.10	protein_coding	expressed
ENSG00000257365.6	protein_coding	expressed
ENSG00000185650.9	protein_coding	expressed
ENSG00000202159.1	snRNA	non-expressed
ENSG00000254741.1	antisense	non-expressed
ENSG00000278393.1	miRNA	non-expressed
ENSG00000221347.1	miRNA	non-expressed
ENSG00000264340.1	antisense	non-expressed
ENSG00000132842.12	protein_coding	expressed
ENSG00000167748.9	protein_coding	expressed
ENSG00000211482.1	miRNA	non-expressed
ENSG00000224078.11	processed_transcript	expressed
ENSG00000200281.1	snRNA	non-expressed
ENSG00000233061.1	sense_intronic	non-expressed
ENSG00000254568.1	antisense	non-expressed
ENSG00000237941.2	antisense	non-expressed
ENSG00000137807.12	protein_coding	expressed
ENSG00000231566.1	lincRNA	expressed
ENSG00000201761.1	snRNA	non-expressed
ENSG00000100302.6	protein_coding	expressed
ENSG00000254066.1	lincRNA	non-expressed
ENSG00000235333.3	transcribed_unprocessed_pseudogene	non-expressed
ENSG00000207475.1	snoRNA	expressed
ENSG00000248850.1	processed_pseudogene	non-expressed
ENSG00000143740.13	protein_coding	expressed
ENSG00000274622.2	miRNA	non-expressed
ENSG00000224563.1	antisense	non-expressed
ENSG00000277810.1	miRNA	non-expressed
ENSG00000163046.14	protein_coding	non-expressed
ENSG00000116001.14	protein_coding	expressed
ENSG00000198947.13	protein_coding	expressed
ENSG00000225006.1	lincRNA	non-expressed
ENSG00000275014.1	misc_RNA	non-expressed
ENSG00000229917.2	processed_pseudogene	expressed
ENSG00000149218.4	protein_coding	expressed
ENSG00000237702.2	TR_V_gene	expressed
ENSG00000215223.3	processed_pseudogene	non-expressed
ENSG00000226779.1	antisense	non-expressed
ENSG00000218227.3	processed_pseudogene	expressed
ENSG00000008517.15	protein_coding	expressed
ENSG00000260259.1	lincRNA	expressed
ENSG00000272096.2	misc_RNA	non-expressed
ENSG00000233126.3	processed_pseudogene	non-expressed
ENSG00000226771.1	antisense	non-expressed
ENSG00000201113.1	snRNA	non-expressed
ENSG00000221438.1	miRNA	non-expressed
ENSG00000137074.17	protein_coding	expressed
ENSG00000179598.5	protein_coding	expressed
ENSG00000257103.7	protein_coding	expressed
ENSG00000205730.6	protein_coding	expressed
ENSG00000267465.5	lincRNA	non-expressed
ENSG00000240777.2	lincRNA	non-expressed
ENSG00000114853.12	protein_coding	expressed
ENSG00000102003.9	protein_coding	expressed
ENSG00000234497.4	antisense	non-expressed
ENSG00000223878.1	processed_pseudogene	expressed
ENSG00000202269.1	snoRNA	non-expressed
ENSG00000158850.13	protein_coding	expressed
ENSG00000206888.1	snRNA	non-expressed
ENSG00000231305.3	antisense	expressed
ENSG00000215399.2	processed_pseudogene	non-expressed
ENSG00000255549.2	unprocessed_pseudogene	non-expressed
ENSG00000215149.3	processed_pseudogene	non-expressed
ENSG00000238131.1	lincRNA	non-expressed
ENSG00000279067.1	TEC	non-expressed
ENSG00000196917.5	protein_coding	expressed
ENSG00000204315.3	protein_coding	expressed
ENSG00000223704.1	lincRNA	expressed
ENSG00000233447.1	unprocessed_pseudogene	non-expressed
ENSG00000166509.9	protein_coding	expressed
ENSG00000201638.2	misc_RNA	non-expressed
ENSG00000242659.1	lincRNA	expressed
ENSG00000255690.2	protein_coding	expressed
ENSG00000201492.1	rRNA	expressed
ENSG00000200537.1	misc_RNA	non-expressed
ENSG00000198944.5	protein_coding	expressed
ENSG00000249951.1	lincRNA	non-expressed
ENSG00000258524.1	processed_pseudogene	expressed
ENSG00000135862.5	protein_coding	expressed
ENSG00000275727.1	miRNA	non-expressed
ENSG00000017427.14	protein_coding	expressed
ENSG00000263618.4	lincRNA	non-expressed
ENSG00000168619.14	protein_coding	non-expressed
ENSG00000278370.1	lincRNA	non-expressed
ENSG00000203858.3	unprocessed_pseudogene	expressed
ENSG00000250242.1	lincRNA	non-expressed
ENSG00000158050.4	protein_coding	expressed
ENSG00000242550.4	protein_coding	non-expressed
ENSG00000159069.12	protein_coding	expressed
ENSG00000252454.2	miRNA	non-expressed
ENSG00000181395.6	pseudogene	non-expressed
ENSG00000127914.15	protein_coding	expressed
ENSG00000232884.6	lincRNA	expressed
ENSG00000242477.1	processed_pseudogene	expressed
ENSG00000257905.1	processed_pseudogene	expressed
ENSG00000274180.1	protein_coding	expressed
ENSG00000277299.1	antisense	expressed
ENSG00000274222.1	miRNA	non-expressed
ENSG00000171310.9	protein_coding	expressed
ENSG00000235303.1	lincRNA	non-expressed
ENSG00000274770.1	miRNA	non-expressed
ENSG00000269388.1	transcribed_processed_pseudogene	expressed
ENSG00000167526.12	protein_coding	expressed
ENSG00000229965.1	processed_pseudogene	expressed
ENSG00000171714.10	protein_coding	expressed
ENSG00000235776.2	processed_pseudogene	expressed
ENSG00000259186.1	processed_pseudogene	non-expressed
ENSG00000204657.3	protein_coding	non-expressed
ENSG00000279297.1	TEC	non-expressed
ENSG00000164331.8	protein_coding	expressed
ENSG00000275833.1	unprocessed_pseudogene	expressed
ENSG00000272692.1	lincRNA	expressed
ENSG00000214067.2	processed_pseudogene	non-expressed
ENSG00000281887.1	protein_coding	non-expressed
ENSG00000228373.2	processed_pseudogene	non-expressed
ENSG00000101310.13	protein_coding	expressed
ENSG00000272798.1	lincRNA	expressed
ENSG00000125107.15	protein_coding	expressed
ENSG00000237682.2	processed_pseudogene	expressed
ENSG00000202434.1	snoRNA	non-expressed
ENSG00000153303.15	protein_coding	expressed
ENSG00000251834.1	snRNA	non-expressed
ENSG00000182704.7	protein_coding	expressed
ENSG00000267874.1	sense_intronic	non-expressed
ENSG00000240309.1	processed_pseudogene	non-expressed
ENSG00000135222.6	protein_coding	non-expressed
ENSG00000158125.8	protein_coding	expressed
ENSG00000101892.10	protein_coding	non-expressed
ENSG00000256025.1	antisense	non-expressed
ENSG00000200274.1	snRNA	non-expressed
ENSG00000162368.12	protein_coding	expressed
ENSG00000275070.1	misc_RNA	expressed
ENSG00000105270.13	protein_coding	expressed
ENSG00000272237.1	snoRNA	non-expressed
ENSG00000268912.1	lincRNA	expressed
ENSG00000160202.6	protein_coding	non-expressed
ENSG00000234886.1	processed_pseudogene	non-expressed
ENSG00000212593.1	snoRNA	non-expressed
ENSG00000235565.1	lincRNA	expressed
ENSG00000204308.7	protein_coding	expressed
ENSG00000275693.1	misc_RNA	non-expressed
ENSG00000230294.4	lincRNA	non-expressed
ENSG00000126903.14	protein_coding	expressed
ENSG00000174165.6	protein_coding	expressed
ENSG00000234864.1	lincRNA	non-expressed
ENSG00000255076.2	sense_intronic	non-expressed
ENSG00000143751.9	protein_coding	expressed
ENSG00000150676.11	protein_coding	expressed
ENSG00000277125.1	unprocessed_pseudogene	non-expressed
ENSG00000178596.10	processed_pseudogene	expressed
ENSG00000222744.1	misc_RNA	non-expressed
ENSG00000253554.4	antisense	expressed
ENSG00000204429.4	processed_pseudogene	non-expressed
ENSG00000225809.1	unprocessed_pseudogene	non-expressed
ENSG00000277008.1	unprocessed_pseudogene	non-expressed
ENSG00000111254.6	protein_coding	expressed
ENSG00000243669.2	processed_pseudogene	non-expressed
ENSG00000110871.13	protein_coding	expressed
ENSG00000263326.1	unprocessed_pseudogene	expressed
ENSG00000271691.1	unprocessed_pseudogene	non-expressed
ENSG00000266711.1	antisense	expressed
ENSG00000231169.4	processed_pseudogene	expressed
ENSG00000257582.4	lincRNA	expressed
ENSG00000258450.1	sense_intronic	expressed
ENSG00000171657.5	protein_coding	expressed
ENSG00000265883.1	processed_pseudogene	non-expressed
ENSG00000204092.2	lincRNA	non-expressed
ENSG00000142798.15	protein_coding	expressed
ENSG00000241074.3	misc_RNA	non-expressed
ENSG00000272129.1	lincRNA	expressed
ENSG00000234756.1	lincRNA	non-expressed
ENSG00000232946.1	processed_pseudogene	expressed
ENSG00000258136.1	antisense	expressed
ENSG00000214684.2	processed_pseudogene	non-expressed
ENSG00000259009.4	unprocessed_pseudogene	non-expressed
ENSG00000248766.2	processed_pseudogene	non-expressed
ENSG00000258375.2	processed_pseudogene	non-expressed
ENSG00000271121.2	processed_pseudogene	non-expressed
ENSG00000242082.1	antisense	expressed
ENSG00000280272.1	TEC	non-expressed
ENSG00000151422.11	protein_coding	expressed
ENSG00000079263.17	protein_coding	expressed
ENSG00000174576.7	protein_coding	expressed
ENSG00000183878.14	protein_coding	expressed
ENSG00000259861.1	lincRNA	non-expressed
ENSG00000226450.2	unprocessed_pseudogene	expressed
ENSG00000228074.1	processed_pseudogene	non-expressed
ENSG00000230801.1	processed_pseudogene	non-expressed
ENSG00000234464.1	lincRNA	non-expressed
ENSG00000237480.1	lincRNA	non-expressed
ENSG00000222397.1	misc_RNA	non-expressed
ENSG00000163531.14	protein_coding	expressed
ENSG00000216904.2	processed_pseudogene	non-expressed
ENSG00000239998.4	protein_coding	expressed
ENSG00000211942.3	IG_V_gene	expressed
ENSG00000233264.2	processed_pseudogene	expressed
ENSG00000162980.15	protein_coding	expressed
ENSG00000206958.1	snoRNA	non-expressed
ENSG00000112855.13	protein_coding	expressed
ENSG00000265073.1	antisense	non-expressed
ENSG00000278076.1	miRNA	non-expressed
ENSG00000162402.11	protein_coding	expressed
ENSG00000277483.1	misc_RNA	non-expressed
ENSG00000201747.1	snRNA	non-expressed
ENSG00000101191.15	protein_coding	expressed
ENSG00000237743.3	transcribed_unprocessed_pseudogene	non-expressed
ENSG00000279541.1	TEC	expressed
ENSG00000146926.9	protein_coding	non-expressed
ENSG00000265752.2	lincRNA	expressed
ENSG00000178934.4	protein_coding	expressed
ENSG00000233684.2	lincRNA	non-expressed
ENSG00000263707.1	antisense	non-expressed
ENSG00000136213.9	protein_coding	expressed
ENSG00000259781.1	processed_pseudogene	expressed
ENSG00000010810.16	protein_coding	expressed
ENSG00000153048.9	protein_coding	expressed
ENSG00000234257.1	processed_pseudogene	non-expressed
ENSG00000261039.2	lincRNA	expressed
ENSG00000124212.5	protein_coding	expressed
ENSG00000124406.15	protein_coding	expressed
ENSG00000120699.11	protein_coding	expressed
ENSG00000211912.1	IG_D_gene	non-expressed
ENSG00000280122.1	TEC	non-expressed
ENSG00000186479.4	protein_coding	expressed
ENSG00000123066.6	protein_coding	expressed
ENSG00000221424.1	miRNA	non-expressed
ENSG00000224209.5	lincRNA	non-expressed
ENSG00000144827.7	protein_coding	expressed
ENSG00000272832.1	lincRNA	expressed
ENSG00000270093.1	lincRNA	expressed
ENSG00000164488.10	protein_coding	expressed
ENSG00000258036.1	unprocessed_pseudogene	non-expressed
ENSG00000265631.1	processed_pseudogene	non-expressed
ENSG00000256294.6	protein_coding	expressed
ENSG00000206931.1	snRNA	non-expressed
ENSG00000200693.2	snoRNA	expressed
ENSG00000211683.3	processed_transcript	expressed
ENSG00000266656.1	miRNA	non-expressed
ENSG00000258408.1	processed_pseudogene	non-expressed
ENSG00000262663.1	lincRNA	expressed
ENSG00000201707.1	snRNA	non-expressed
ENSG00000170325.13	protein_coding	expressed
ENSG00000267162.1	processed_pseudogene	non-expressed
ENSG00000199153.1	miRNA	non-expressed
ENSG00000224204.1	antisense	non-expressed
ENSG00000103460.15	protein_coding	expressed
ENSG00000188334.3	protein_coding	non-expressed
ENSG00000182591.5	protein_coding	non-expressed
ENSG00000277592.1	misc_RNA	non-expressed
ENSG00000249038.2	processed_pseudogene	non-expressed
ENSG00000259621.1	antisense	non-expressed
ENSG00000271049.1	processed_pseudogene	expressed
ENSG00000269927.1	lincRNA	expressed
ENSG00000206858.1	misc_RNA	non-expressed
ENSG00000241064.3	misc_RNA	non-expressed
ENSG00000229528.1	antisense	non-expressed
ENSG00000264879.2	misc_RNA	non-expressed
ENSG00000239393.1	processed_pseudogene	expressed
ENSG00000240821.1	processed_pseudogene	non-expressed
ENSG00000266666.1	miRNA	non-expressed
ENSG00000250427.1	lincRNA	non-expressed
ENSG00000250486.3	protein_coding	expressed
ENSG00000244649.3	lincRNA	expressed
ENSG00000083838.14	protein_coding	expressed
ENSG00000134255.12	protein_coding	expressed
ENSG00000165355.7	protein_coding	expressed
ENSG00000189013.13	protein_coding	expressed
ENSG00000101000.4	protein_coding	expressed
ENSG00000263990.1	lincRNA	expressed
ENSG00000279946.1	TEC	non-expressed
ENSG00000115947.12	protein_coding	expressed
ENSG00000230445.4	transcribed_processed_pseudogene	expressed
ENSG00000254538.1	lincRNA	non-expressed
ENSG00000227745.1	unprocessed_pseudogene	expressed
ENSG00000239333.3	misc_RNA	non-expressed
ENSG00000252661.1	snRNA	non-expressed
ENSG00000100441.8	protein_coding	expressed
ENSG00000233288.1	lincRNA	non-expressed
ENSG00000264406.1	miRNA	non-expressed
ENSG00000243538.1	processed_pseudogene	expressed
ENSG00000251438.1	antisense	non-expressed
ENSG00000215915.8	protein_coding	expressed
ENSG00000200815.1	snRNA	non-expressed
ENSG00000234283.1	lincRNA	non-expressed
ENSG00000143702.14	protein_coding	expressed
ENSG00000213435.3	processed_pseudogene	expressed
ENSG00000249990.1	processed_pseudogene	non-expressed
ENSG00000240241.4	lincRNA	non-expressed
ENSG00000226827.1	processed_pseudogene	non-expressed
ENSG00000244756.1	processed_pseudogene	expressed
ENSG00000198156.9	protein_coding	expressed
ENSG00000258517.1	lincRNA	non-expressed
ENSG00000251031.1	lincRNA	non-expressed
ENSG00000237363.1	unprocessed_pseudogene	non-expressed
ENSG00000226317.2	lincRNA	non-expressed
ENSG00000224906.3	processed_pseudogene	expressed
ENSG00000250915.1	lincRNA	non-expressed
ENSG00000204936.8	protein_coding	expressed
ENSG00000122068.11	protein_coding	expressed
ENSG00000234692.1	lincRNA	non-expressed
ENSG00000275315.1	unprocessed_pseudogene	non-expressed
ENSG00000228851.1	unprocessed_pseudogene	non-expressed
ENSG00000251603.1	antisense	expressed
ENSG00000226668.4	transcribed_unprocessed_pseudogene	non-expressed
ENSG00000238726.1	miRNA	non-expressed
ENSG00000188816.3	protein_coding	expressed
ENSG00000261600.1	lincRNA	expressed
ENSG00000119844.13	protein_coding	expressed
ENSG00000202529.1	snoRNA	non-expressed
ENSG00000214353.6	antisense	expressed
ENSG00000167770.10	protein_coding	expressed
ENSG00000256081.2	processed_pseudogene	non-expressed
ENSG00000268500.4	protein_coding	non-expressed
ENSG00000218305.3	processed_pseudogene	non-expressed
ENSG00000281593.1	protein_coding	expressed
ENSG00000257198.5	transcribed_unprocessed_pseudogene	non-expressed
ENSG00000250252.1	lincRNA	non-expressed
ENSG00000254884.1	processed_pseudogene	expressed
ENSG00000274124.1	antisense	expressed
ENSG00000275830.1	lincRNA	non-expressed
ENSG00000135083.13	protein_coding	expressed
ENSG00000254519.2	lincRNA	non-expressed
ENSG00000101367.8	protein_coding	expressed
ENSG00000273063.1	antisense	non-expressed
ENSG00000249988.1	lincRNA	non-expressed
ENSG00000166405.13	protein_coding	expressed
ENSG00000255987.1	processed_pseudogene	expressed
ENSG00000267048.1	processed_transcript	expressed
ENSG00000213315.5	processed_pseudogene	expressed
ENSG00000227799.1	processed_pseudogene	expressed
ENSG00000239900.10	protein_coding	expressed
ENSG00000271251.1	processed_pseudogene	non-expressed
ENSG00000114993.14	protein_coding	expressed
ENSG00000189332.5	transcribed_unprocessed_pseudogene	non-expressed
ENSG00000117682.15	protein_coding	expressed
ENSG00000174450.10	protein_coding	expressed
ENSG00000110169.9	protein_coding	expressed
ENSG00000010319.5	protein_coding	expressed
ENSG00000204021.3	protein_coding	non-expressed
ENSG00000189420.8	protein_coding	expressed
ENSG00000232065.1	antisense	expressed
ENSG00000198833.6	protein_coding	expressed
ENSG00000201048.1	misc_RNA	non-expressed
ENSG00000275126.1	protein_coding	expressed
ENSG00000258822.1	unprocessed_pseudogene	non-expressed
ENSG00000201807.1	snoRNA	non-expressed
ENSG00000256311.1	antisense	non-expressed
ENSG00000244128.4	lincRNA	expressed
ENSG00000222667.1	snRNA	non-expressed
ENSG00000211779.3	TR_V_gene	expressed
ENSG00000202427.1	snRNA	non-expressed
ENSG00000274501.1	antisense	expressed
ENSG00000259056.1	transcribed_unprocessed_pseudogene	expressed
ENSG00000226433.1	antisense	non-expressed
ENSG00000018625.13	protein_coding	expressed
ENSG00000165502.6	protein_coding	expressed
ENSG00000111711.8	protein_coding	expressed
ENSG00000248684.1	processed_pseudogene	non-expressed
ENSG00000172322.12	protein_coding	expressed
ENSG00000281632.1	miRNA	non-expressed
ENSG00000255029.1	lincRNA	non-expressed
ENSG00000240281.2	processed_pseudogene	non-expressed
ENSG00000122545.16	protein_coding	expressed
ENSG00000201742.1	snRNA	non-expressed
ENSG00000137804.11	protein_coding	expressed
ENSG00000202225.1	rRNA	non-expressed
ENSG00000233385.1	unprocessed_pseudogene	non-expressed
ENSG00000087116.12	protein_coding	expressed
ENSG00000221280.2	miRNA	non-expressed
ENSG00000231961.1	processed_pseudogene	non-expressed
ENSG00000226695.1	processed_pseudogene	expressed
ENSG00000115268.8	protein_coding	expressed
ENSG00000179361.16	protein_coding	expressed
ENSG00000146143.16	protein_coding	expressed
ENSG00000089050.13	protein_coding	expressed
ENSG00000259724.1	lincRNA	expressed
ENSG00000234380.1	antisense	expressed
ENSG00000103599.18	protein_coding	expressed
ENSG00000279085.1	antisense	expressed
ENSG00000107331.15	protein_coding	expressed
ENSG00000252817.2	miRNA	expressed
ENSG00000252891.1	misc_RNA	non-expressed
ENSG00000153317.13	protein_coding	expressed
ENSG00000259375.1	antisense	non-expressed
ENSG00000229030.1	processed_pseudogene	non-expressed
ENSG00000207726.2	miRNA	non-expressed
ENSG00000254428.1	antisense	expressed
ENSG00000184661.12	protein_coding	expressed
ENSG00000236252.2	transcribed_processed_pseudogene	non-expressed
ENSG00000271195.1	processed_pseudogene	non-expressed
ENSG00000237913.1	processed_pseudogene	non-expressed
ENSG00000261122.5	lincRNA	non-expressed
ENSG00000242405.2	processed_pseudogene	expressed
ENSG00000274127.1	misc_RNA	non-expressed
[truncated: 58,484 more rows]

## Sheet: HNSC
gene	gene_type	status
ENSG00000207922.1	miRNA	non-expressed
ENSG00000168872.14	protein_coding	expressed
ENSG00000182272.10	protein_coding	expressed
ENSG00000251686.1	unprocessed_pseudogene	non-expressed
ENSG00000108960.6	protein_coding	expressed
ENSG00000252452.1	snRNA	non-expressed
ENSG00000275075.1	processed_pseudogene	non-expressed
ENSG00000196814.13	protein_coding	expressed
ENSG00000134323.10	protein_coding	expressed
ENSG00000239373.3	misc_RNA	non-expressed
ENSG00000139537.9	protein_coding	expressed
ENSG00000145723.15	protein_coding	expressed
ENSG00000263305.1	lincRNA	non-expressed
ENSG00000204754.3	lincRNA	non-expressed
ENSG00000235011.2	lincRNA	non-expressed
ENSG00000132932.15	protein_coding	expressed
ENSG00000257115.1	protein_coding	non-expressed
ENSG00000272971.1	lincRNA	non-expressed
ENSG00000196661.3	protein_coding	non-expressed
ENSG00000197465.12	protein_coding	expressed
ENSG00000231812.1	processed_pseudogene	non-expressed
ENSG00000254586.1	lincRNA	non-expressed
ENSG00000145826.7	protein_coding	non-expressed
ENSG00000265778.2	antisense	expressed
ENSG00000200957.1	snRNA	non-expressed
ENSG00000278203.1	miRNA	non-expressed
ENSG00000117090.13	protein_coding	expressed
ENSG00000061492.10	protein_coding	non-expressed
ENSG00000237798.1	antisense	non-expressed
ENSG00000214248.2	antisense	expressed
ENSG00000213416.3	protein_coding	non-expressed
ENSG00000247151.5	antisense	expressed
ENSG00000214184.3	antisense	expressed
ENSG00000250863.1	lincRNA	non-expressed
ENSG00000197763.11	protein_coding	expressed
ENSG00000139116.16	protein_coding	expressed
ENSG00000243431.1	processed_pseudogene	expressed
ENSG00000265485.4	lincRNA	expressed
ENSG00000270750.1	lincRNA	expressed
ENSG00000116133.10	protein_coding	expressed
ENSG00000229720.1	lincRNA	expressed
ENSG00000277189.1	miRNA	non-expressed
ENSG00000227207.2	processed_pseudogene	non-expressed
ENSG00000134138.18	protein_coding	expressed
ENSG00000173262.10	protein_coding	expressed
ENSG00000212254.1	snRNA	non-expressed
ENSG00000144381.15	protein_coding	expressed
ENSG00000176896.8	protein_coding	expressed
ENSG00000225471.4	transcribed_processed_pseudogene	expressed
ENSG00000250902.1	antisense	non-expressed
ENSG00000129474.14	protein_coding	expressed
ENSG00000171476.20	protein_coding	expressed
ENSG00000280511.1	lincRNA	non-expressed
ENSG00000234551.1	lincRNA	non-expressed
ENSG00000187621.13	processed_transcript	expressed
ENSG00000138152.8	protein_coding	expressed
ENSG00000241280.1	lincRNA	expressed
ENSG00000227777.1	processed_pseudogene	expressed
ENSG00000177243.3	protein_coding	non-expressed
ENSG00000230838.1	lincRNA	expressed
ENSG00000268051.1	sense_intronic	non-expressed
ENSG00000255121.2	lincRNA	expressed
ENSG00000188467.9	protein_coding	non-expressed
ENSG00000245729.2	lincRNA	non-expressed
ENSG00000178965.12	protein_coding	expressed
ENSG00000277043.1	processed_pseudogene	non-expressed
ENSG00000238304.1	snRNA	non-expressed
ENSG00000178031.14	protein_coding	expressed
ENSG00000172752.13	protein_coding	expressed
ENSG00000067900.6	protein_coding	expressed
ENSG00000011114.13	protein_coding	expressed
ENSG00000130518.15	protein_coding	expressed
ENSG00000101166.14	protein_coding	expressed
ENSG00000103343.11	protein_coding	expressed
ENSG00000140553.15	protein_coding	expressed
ENSG00000203756.6	protein_coding	expressed
ENSG00000266364.1	transcribed_processed_pseudogene	non-expressed
ENSG00000025800.12	protein_coding	expressed
ENSG00000166317.10	protein_coding	expressed
ENSG00000250273.1	processed_pseudogene	non-expressed
ENSG00000243115.3	misc_RNA	non-expressed
ENSG00000184076.12	protein_coding	expressed
ENSG00000134748.12	protein_coding	expressed
ENSG00000227331.1	processed_pseudogene	expressed
ENSG00000261731.2	antisense	non-expressed
ENSG00000240767.3	misc_RNA	non-expressed
ENSG00000176387.6	protein_coding	expressed
ENSG00000241146.1	processed_pseudogene	non-expressed
ENSG00000146278.10	protein_coding	expressed
ENSG00000267679.1	processed_pseudogene	expressed
ENSG00000226200.5	antisense	expressed
ENSG00000162654.8	protein_coding	expressed
ENSG00000270612.1	processed_pseudogene	non-expressed
ENSG00000094804.8	protein_coding	expressed
ENSG00000116209.10	protein_coding	expressed
ENSG00000081853.14	protein_coding	expressed
ENSG00000248514.1	antisense	expressed
ENSG00000237252.1	processed_pseudogene	non-expressed
ENSG00000271100.1	processed_pseudogene	non-expressed
ENSG00000232661.1	antisense	non-expressed
ENSG00000254164.1	lincRNA	non-expressed
ENSG00000225639.1	processed_pseudogene	non-expressed
ENSG00000224244.1	unprocessed_pseudogene	non-expressed
ENSG00000269954.1	lincRNA	non-expressed
ENSG00000185519.8	protein_coding	expressed
ENSG00000159055.3	protein_coding	expressed
ENSG00000204603.5	lincRNA	non-expressed
ENSG00000201242.1	misc_RNA	non-expressed
ENSG00000242036.1	processed_pseudogene	non-expressed
ENSG00000258747.1	antisense	non-expressed
ENSG00000265744.1	miRNA	non-expressed
ENSG00000230223.5	antisense	non-expressed
ENSG00000119915.4	protein_coding	expressed
ENSG00000281273.1	protein_coding	expressed
ENSG00000276037.1	miRNA	non-expressed
ENSG00000103710.9	protein_coding	expressed
ENSG00000254415.3	protein_coding	expressed
ENSG00000255360.1	unprocessed_pseudogene	non-expressed
ENSG00000254710.1	antisense	non-expressed
ENSG00000276786.1	lincRNA	non-expressed
ENSG00000214003.2	processed_pseudogene	non-expressed
ENSG00000229600.1	lincRNA	non-expressed
ENSG00000234877.2	lincRNA	non-expressed
ENSG00000111674.7	protein_coding	expressed
ENSG00000252575.1	miRNA	non-expressed
ENSG00000278870.1	polymorphic_pseudogene	non-expressed
ENSG00000007168.11	protein_coding	expressed
ENSG00000236615.1	unprocessed_pseudogene	non-expressed
ENSG00000231610.1	processed_pseudogene	non-expressed
ENSG00000233120.1	unprocessed_pseudogene	non-expressed
ENSG00000179673.4	protein_coding	non-expressed
ENSG00000237115.2	processed_pseudogene	non-expressed
ENSG00000218809.1	unprocessed_pseudogene	expressed
ENSG00000221234.1	miRNA	non-expressed
ENSG00000231816.1	lincRNA	expressed
ENSG00000259389.2	processed_pseudogene	non-expressed
ENSG00000248873.1	processed_pseudogene	expressed
ENSG00000277767.1	lincRNA	expressed
ENSG00000234763.1	lincRNA	non-expressed
ENSG00000203697.10	protein_coding	expressed
ENSG00000229536.1	lincRNA	expressed
ENSG00000275084.2	snoRNA	non-expressed
ENSG00000278123.1	snoRNA	non-expressed
ENSG00000201176.1	snRNA	non-expressed
ENSG00000267383.5	antisense	expressed
ENSG00000145293.13	protein_coding	expressed
ENSG00000139910.18	protein_coding	expressed
ENSG00000228995.1	processed_pseudogene	non-expressed
ENSG00000168389.16	protein_coding	expressed
ENSG00000238561.1	snRNA	non-expressed
ENSG00000206779.1	misc_RNA	non-expressed
ENSG00000105223.17	protein_coding	expressed
ENSG00000164062.11	protein_coding	expressed
ENSG00000272288.4	antisense	expressed
ENSG00000264801.1	transcribed_processed_pseudogene	expressed
ENSG00000237449.1	unitary_pseudogene	non-expressed
ENSG00000253164.4	lincRNA	non-expressed
ENSG00000252316.1	misc_RNA	non-expressed
ENSG00000259856.1	processed_pseudogene	expressed
ENSG00000251546.1	IG_V_gene	expressed
ENSG00000259151.2	transcribed_processed_pseudogene	expressed
ENSG00000239763.2	processed_pseudogene	expressed
ENSG00000198626.14	protein_coding	expressed
ENSG00000256480.1	processed_pseudogene	non-expressed
ENSG00000272902.2	lincRNA	expressed
ENSG00000099953.8	protein_coding	expressed
ENSG00000225407.3	antisense	non-expressed
ENSG00000173275.11	protein_coding	expressed
ENSG00000271933.1	antisense	expressed
ENSG00000249811.2	protein_coding	non-expressed
ENSG00000249404.1	lincRNA	non-expressed
ENSG00000227995.1	processed_pseudogene	non-expressed
ENSG00000222842.1	misc_RNA	non-expressed
ENSG00000275220.1	miRNA	non-expressed
ENSG00000251323.2	lincRNA	expressed
ENSG00000264345.1	lincRNA	non-expressed
ENSG00000223652.2	antisense	expressed
ENSG00000230650.1	processed_pseudogene	expressed
ENSG00000277987.1	lincRNA	non-expressed
ENSG00000134900.10	protein_coding	expressed
ENSG00000207548.2	miRNA	non-expressed
ENSG00000224943.1	lincRNA	non-expressed
ENSG00000278907.1	antisense	non-expressed
ENSG00000262151.1	antisense	non-expressed
ENSG00000259347.4	lincRNA	non-expressed
ENSG00000160396.8	protein_coding	expressed
ENSG00000177888.7	protein_coding	expressed
ENSG00000177990.10	protein_coding	expressed
ENSG00000235750.8	protein_coding	expressed
ENSG00000276150.1	misc_RNA	non-expressed
ENSG00000238448.1	miRNA	non-expressed
ENSG00000159445.11	protein_coding	expressed
ENSG00000267150.1	antisense	expressed
ENSG00000232109.1	processed_pseudogene	expressed
ENSG00000137675.4	protein_coding	expressed
ENSG00000229531.4	antisense	non-expressed
ENSG00000178458.5	processed_pseudogene	expressed
ENSG00000207559.1	miRNA	non-expressed
ENSG00000006432.14	protein_coding	expressed
ENSG00000260307.2	processed_pseudogene	non-expressed
ENSG00000259115.1	lincRNA	non-expressed
ENSG00000235831.5	antisense	expressed
ENSG00000226804.4	processed_pseudogene	non-expressed
ENSG00000155561.13	protein_coding	expressed
ENSG00000223966.1	antisense	non-expressed
ENSG00000236246.1	processed_pseudogene	non-expressed
ENSG00000106927.10	protein_coding	expressed
ENSG00000224732.1	unprocessed_pseudogene	non-expressed
ENSG00000197959.12	protein_coding	expressed
ENSG00000188313.11	protein_coding	expressed
ENSG00000231990.1	lincRNA	non-expressed
ENSG00000253869.1	processed_pseudogene	non-expressed
ENSG00000279227.1	TEC	expressed
ENSG00000270493.1	processed_pseudogene	non-expressed
ENSG00000120280.5	protein_coding	expressed
ENSG00000280039.1	TEC	expressed
ENSG00000128641.16	protein_coding	expressed
ENSG00000211944.2	IG_V_gene	expressed
ENSG00000255148.2	antisense	non-expressed
ENSG00000153060.6	protein_coding	expressed
ENSG00000270623.1	processed_pseudogene	non-expressed
ENSG00000275467.1	lincRNA	non-expressed
ENSG00000153898.11	protein_coding	expressed
ENSG00000003249.12	protein_coding	expressed
ENSG00000149506.9	protein_coding	expressed
ENSG00000106809.9	protein_coding	expressed
ENSG00000153310.17	protein_coding	expressed
ENSG00000259252.1	lincRNA	non-expressed
ENSG00000259518.1	lincRNA	expressed
ENSG00000218730.1	processed_pseudogene	non-expressed
ENSG00000126583.9	protein_coding	expressed
ENSG00000278128.1	processed_pseudogene	non-expressed
ENSG00000223387.5	lincRNA	expressed
ENSG00000200262.1	misc_RNA	non-expressed
ENSG00000199071.2	miRNA	non-expressed
ENSG00000105255.9	protein_coding	expressed
ENSG00000256609.1	antisense	expressed
ENSG00000258509.1	processed_pseudogene	non-expressed
ENSG00000270558.1	processed_pseudogene	expressed
ENSG00000197024.7	protein_coding	expressed
ENSG00000257355.1	protein_coding	non-expressed
ENSG00000237460.2	lincRNA	non-expressed
ENSG00000175197.9	protein_coding	expressed
ENSG00000075651.14	protein_coding	expressed
ENSG00000165092.11	protein_coding	expressed
ENSG00000266151.1	miRNA	non-expressed
ENSG00000252959.1	rRNA	non-expressed
ENSG00000233960.1	lincRNA	non-expressed
ENSG00000109625.17	protein_coding	expressed
ENSG00000268030.1	antisense	expressed
ENSG00000221628.1	miRNA	non-expressed
ENSG00000270605.1	antisense	expressed
ENSG00000244361.1	processed_pseudogene	non-expressed
ENSG00000224256.1	processed_pseudogene	non-expressed
ENSG00000266189.1	miRNA	non-expressed
ENSG00000170745.10	protein_coding	expressed
ENSG00000127995.15	protein_coding	expressed
ENSG00000279153.1	TEC	non-expressed
ENSG00000276692.1	processed_pseudogene	non-expressed
ENSG00000225640.1	lincRNA	non-expressed
ENSG00000227958.1	lincRNA	non-expressed
ENSG00000234354.3	processed_pseudogene	expressed
ENSG00000125868.14	protein_coding	expressed
ENSG00000237807.3	lincRNA	expressed
ENSG00000168137.14	protein_coding	expressed
ENSG00000182472.7	protein_coding	expressed
ENSG00000252983.1	snRNA	non-expressed
ENSG00000275716.1	processed_pseudogene	non-expressed
ENSG00000273497.1	unprocessed_pseudogene	non-expressed
ENSG00000251113.2	processed_pseudogene	non-expressed
ENSG00000213149.3	processed_pseudogene	expressed
ENSG00000173124.13	protein_coding	non-expressed
ENSG00000141985.8	protein_coding	expressed
ENSG00000168748.12	protein_coding	expressed
ENSG00000004776.10	protein_coding	expressed
ENSG00000228577.1	antisense	expressed
ENSG00000272113.2	misc_RNA	non-expressed
ENSG00000134443.8	protein_coding	expressed
ENSG00000201470.1	misc_RNA	non-expressed
ENSG00000252745.1	rRNA	non-expressed
ENSG00000185792.8	protein_coding	non-expressed
ENSG00000106327.11	protein_coding	expressed
ENSG00000112837.15	protein_coding	expressed
ENSG00000254860.4	antisense	expressed
ENSG00000267308.1	lincRNA	non-expressed
ENSG00000180747.14	transcribed_unprocessed_pseudogene	expressed
ENSG00000187122.15	protein_coding	expressed
ENSG00000142089.14	protein_coding	expressed
ENSG00000278348.1	misc_RNA	non-expressed
ENSG00000221016.1	miRNA	non-expressed
ENSG00000187792.4	protein_coding	expressed
ENSG00000124678.16	protein_coding	expressed
ENSG00000186369.8	lincRNA	non-expressed
ENSG00000239525.1	processed_pseudogene	non-expressed
ENSG00000140525.16	protein_coding	expressed
ENSG00000255545.6	processed_transcript	non-expressed
ENSG00000240533.3	misc_RNA	non-expressed
ENSG00000254279.1	IG_V_pseudogene	non-expressed
ENSG00000250260.1	lincRNA	non-expressed
ENSG00000164972.11	protein_coding	expressed
ENSG00000244260.1	lincRNA	non-expressed
ENSG00000156261.11	protein_coding	expressed
ENSG00000236844.1	processed_pseudogene	expressed
ENSG00000046653.13	protein_coding	expressed
ENSG00000277861.1	miRNA	non-expressed
ENSG00000145882.9	protein_coding	expressed
ENSG00000229654.1	lincRNA	non-expressed
ENSG00000241188.3	misc_RNA	non-expressed
ENSG00000275229.1	snRNA	non-expressed
ENSG00000200220.1	snRNA	non-expressed
ENSG00000265691.1	miRNA	non-expressed
ENSG00000239465.1	processed_pseudogene	non-expressed
ENSG00000175143.3	protein_coding	non-expressed
ENSG00000187533.12	protein_coding	expressed
ENSG00000277682.1	miRNA	non-expressed
ENSG00000183909.5	unprocessed_pseudogene	non-expressed
ENSG00000265820.1	miRNA	non-expressed
ENSG00000239988.1	processed_pseudogene	non-expressed
ENSG00000232778.1	processed_pseudogene	non-expressed
ENSG00000267452.1	lincRNA	expressed
ENSG00000279925.1	TEC	non-expressed
ENSG00000227140.3	protein_coding	non-expressed
ENSG00000280945.1	miRNA	non-expressed
ENSG00000276764.1	misc_RNA	non-expressed
ENSG00000276678.1	misc_RNA	non-expressed
ENSG00000238644.1	miRNA	non-expressed
ENSG00000221803.1	snoRNA	non-expressed
ENSG00000251400.1	processed_pseudogene	expressed
ENSG00000259374.2	transcribed_processed_pseudogene	expressed
ENSG00000176246.1	protein_coding	non-expressed
ENSG00000131943.16	protein_coding	expressed
ENSG00000198491.3	antisense	non-expressed
ENSG00000104472.8	protein_coding	expressed
ENSG00000239917.3	unprocessed_pseudogene	expressed
ENSG00000253571.1	processed_pseudogene	non-expressed
ENSG00000224918.1	lincRNA	non-expressed
ENSG00000212073.1	miRNA	non-expressed
ENSG00000212348.1	snRNA	non-expressed
ENSG00000259498.1	antisense	expressed
ENSG00000159259.7	protein_coding	expressed
ENSG00000262877.4	lincRNA	expressed
ENSG00000138600.8	protein_coding	expressed
ENSG00000215326.3	processed_pseudogene	expressed
ENSG00000214853.4	processed_pseudogene	non-expressed
ENSG00000276729.1	misc_RNA	non-expressed
ENSG00000146383.7	protein_coding	non-expressed
ENSG00000250976.1	antisense	non-expressed
ENSG00000201407.1	snoRNA	non-expressed
ENSG00000229862.4	antisense	non-expressed
ENSG00000257219.4	lincRNA	expressed
ENSG00000184571.12	protein_coding	non-expressed
ENSG00000237260.1	processed_pseudogene	non-expressed
ENSG00000237804.1	processed_pseudogene	expressed
ENSG00000264897.1	miRNA	non-expressed
ENSG00000231913.1	processed_pseudogene	non-expressed
ENSG00000279018.1	protein_coding	non-expressed
ENSG00000225637.1	lincRNA	expressed
ENSG00000280636.1	snoRNA	non-expressed
ENSG00000279645.1	TEC	non-expressed
ENSG00000244998.1	antisense	expressed
ENSG00000223728.3	processed_pseudogene	non-expressed
ENSG00000258623.1	antisense	expressed
ENSG00000225520.1	lincRNA	expressed
ENSG00000188755.8	transcribed_unprocessed_pseudogene	non-expressed
ENSG00000232998.1	antisense	non-expressed
ENSG00000163872.14	protein_coding	expressed
ENSG00000165671.17	protein_coding	expressed
ENSG00000135387.18	protein_coding	expressed
ENSG00000272742.1	antisense	non-expressed
ENSG00000225536.2	processed_pseudogene	expressed
ENSG00000229832.1	sense_intronic	expressed
ENSG00000150750.6	protein_coding	expressed
ENSG00000105254.10	protein_coding	expressed
ENSG00000256861.1	protein_coding	non-expressed
ENSG00000235903.6	antisense	expressed
ENSG00000230746.1	lincRNA	non-expressed
ENSG00000231104.7	antisense	non-expressed
ENSG00000165309.12	protein_coding	expressed
ENSG00000233750.3	processed_pseudogene	expressed
ENSG00000239057.1	miRNA	non-expressed
ENSG00000235875.3	antisense	non-expressed
ENSG00000138642.13	protein_coding	expressed
ENSG00000233017.2	antisense	expressed
ENSG00000264519.2	misc_RNA	non-expressed
ENSG00000168209.4	protein_coding	expressed
ENSG00000149923.12	protein_coding	expressed
ENSG00000237458.1	processed_pseudogene	non-expressed
ENSG00000088305.17	protein_coding	expressed
ENSG00000214832.5	transcribed_processed_pseudogene	expressed
ENSG00000211681.2	IG_J_gene	non-expressed
ENSG00000260113.3	processed_pseudogene	non-expressed
ENSG00000255136.2	lincRNA	non-expressed
ENSG00000133639.4	protein_coding	expressed
ENSG00000243147.6	protein_coding	expressed
ENSG00000199237.1	snRNA	non-expressed
ENSG00000207127.1	misc_RNA	non-expressed
ENSG00000108591.8	protein_coding	expressed
ENSG00000211538.1	miRNA	non-expressed
ENSG00000265639.1	processed_pseudogene	non-expressed
ENSG00000250300.1	unprocessed_pseudogene	non-expressed
ENSG00000280401.1	TEC	expressed
ENSG00000274390.1	miRNA	non-expressed
ENSG00000258963.1	unprocessed_pseudogene	non-expressed
ENSG00000199634.1	snRNA	non-expressed
ENSG00000222997.1	misc_RNA	non-expressed
ENSG00000254290.1	lincRNA	non-expressed
ENSG00000279058.1	protein_coding	expressed
ENSG00000249284.1	processed_pseudogene	non-expressed
ENSG00000273694.1	snRNA	non-expressed
ENSG00000271397.1	processed_pseudogene	non-expressed
ENSG00000142945.11	protein_coding	expressed
ENSG00000242278.1	processed_pseudogene	non-expressed
ENSG00000199218.1	misc_RNA	non-expressed
ENSG00000201523.1	rRNA	non-expressed
ENSG00000156414.17	protein_coding	expressed
ENSG00000134086.7	protein_coding	expressed
ENSG00000132640.13	protein_coding	expressed
ENSG00000167634.11	protein_coding	expressed
ENSG00000204991.9	protein_coding	expressed
ENSG00000240791.1	unprocessed_pseudogene	non-expressed
ENSG00000220113.2	processed_pseudogene	non-expressed
ENSG00000253203.5	transcribed_unprocessed_pseudogene	expressed
ENSG00000225302.2	antisense	expressed
ENSG00000111843.12	protein_coding	expressed
ENSG00000258591.2	processed_pseudogene	expressed
ENSG00000268812.3	antisense	expressed
ENSG00000274092.1	antisense	expressed
ENSG00000149243.14	protein_coding	expressed
ENSG00000250173.1	lincRNA	non-expressed
ENSG00000241956.8	antisense	non-expressed
ENSG00000250622.1	processed_pseudogene	non-expressed
ENSG00000248521.1	processed_pseudogene	non-expressed
ENSG00000201348.1	snoRNA	non-expressed
ENSG00000204175.5	protein_coding	expressed
ENSG00000225352.1	processed_pseudogene	non-expressed
ENSG00000101966.11	protein_coding	expressed
ENSG00000253054.1	snRNA	non-expressed
ENSG00000215483.7	lincRNA	expressed
ENSG00000207387.1	misc_RNA	non-expressed
ENSG00000213924.3	processed_pseudogene	non-expressed
ENSG00000162616.8	protein_coding	expressed
ENSG00000183474.14	protein_coding	expressed
ENSG00000228265.4	lincRNA	expressed
ENSG00000258926.1	antisense	expressed
ENSG00000136697.11	protein_coding	expressed
ENSG00000214282.3	processed_pseudogene	expressed
ENSG00000219361.1	processed_pseudogene	non-expressed
ENSG00000204837.3	unprocessed_pseudogene	expressed
ENSG00000132622.9	protein_coding	expressed
ENSG00000243220.1	antisense	non-expressed
ENSG00000236885.1	lincRNA	non-expressed
ENSG00000114737.14	protein_coding	expressed
ENSG00000135749.17	protein_coding	expressed
ENSG00000261468.1	sense_overlapping	expressed
ENSG00000130427.2	protein_coding	expressed
ENSG00000231628.1	antisense	expressed
ENSG00000189319.12	protein_coding	expressed
ENSG00000251257.2	antisense	expressed
ENSG00000155229.19	protein_coding	expressed
ENSG00000165409.14	protein_coding	expressed
ENSG00000188869.11	protein_coding	expressed
ENSG00000201179.1	snRNA	non-expressed
ENSG00000235203.2	unprocessed_pseudogene	non-expressed
ENSG00000279319.1	TEC	expressed
ENSG00000131378.12	protein_coding	expressed
ENSG00000231963.1	antisense	non-expressed
ENSG00000227186.1	antisense	non-expressed
ENSG00000254070.1	processed_pseudogene	non-expressed
ENSG00000158485.9	protein_coding	expressed
ENSG00000229192.5	lincRNA	non-expressed
ENSG00000274420.1	misc_RNA	non-expressed
ENSG00000224411.3	processed_pseudogene	expressed
ENSG00000266304.1	lincRNA	expressed
ENSG00000225397.1	processed_pseudogene	non-expressed
ENSG00000226360.5	processed_pseudogene	expressed
ENSG00000267301.1	processed_pseudogene	expressed
ENSG00000226609.1	antisense	non-expressed
ENSG00000217539.2	processed_pseudogene	non-expressed
ENSG00000233996.1	processed_pseudogene	non-expressed
ENSG00000269191.1	antisense	expressed
ENSG00000144935.13	protein_coding	expressed
ENSG00000184659.5	protein_coding	non-expressed
ENSG00000251401.2	processed_pseudogene	non-expressed
ENSG00000225807.1	lincRNA	non-expressed
ENSG00000227513.1	processed_pseudogene	non-expressed
ENSG00000213750.4	processed_pseudogene	expressed
ENSG00000239659.2	processed_pseudogene	non-expressed
ENSG00000241693.2	misc_RNA	non-expressed
ENSG00000278703.1	lincRNA	expressed
ENSG00000109133.11	protein_coding	expressed
ENSG00000138028.13	protein_coding	expressed
ENSG00000075420.11	protein_coding	expressed
ENSG00000169509.5	protein_coding	expressed
ENSG00000221725.1	snRNA	non-expressed
ENSG00000249045.1	unprocessed_pseudogene	non-expressed
ENSG00000271173.1	processed_pseudogene	non-expressed
ENSG00000257150.2	transcribed_processed_pseudogene	expressed
ENSG00000125089.15	protein_coding	expressed
ENSG00000242607.1	processed_pseudogene	expressed
ENSG00000256343.6	lincRNA	non-expressed
ENSG00000275510.1	miRNA	non-expressed
ENSG00000271468.1	processed_pseudogene	non-expressed
ENSG00000266922.1	sense_intronic	non-expressed
ENSG00000254076.1	processed_pseudogene	non-expressed
ENSG00000252218.1	scaRNA	non-expressed
ENSG00000171612.6	protein_coding	expressed
ENSG00000231341.1	processed_pseudogene	non-expressed
ENSG00000228569.1	lincRNA	non-expressed
ENSG00000198106.8	lincRNA	expressed
ENSG00000240800.1	transcribed_unprocessed_pseudogene	non-expressed
ENSG00000166845.12	protein_coding	expressed
ENSG00000200530.1	snoRNA	non-expressed
ENSG00000123999.4	protein_coding	expressed
ENSG00000277468.1	misc_RNA	non-expressed
ENSG00000176922.3	protein_coding	non-expressed
ENSG00000221910.2	protein_coding	non-expressed
ENSG00000260866.1	unprocessed_pseudogene	non-expressed
ENSG00000215895.4	processed_pseudogene	expressed
ENSG00000221354.1	miRNA	non-expressed
ENSG00000100288.18	protein_coding	expressed
ENSG00000251286.2	processed_pseudogene	non-expressed
ENSG00000145908.11	protein_coding	expressed
ENSG00000234848.1	antisense	non-expressed
ENSG00000275992.1	misc_RNA	non-expressed
ENSG00000146122.15	protein_coding	expressed
ENSG00000163297.15	protein_coding	expressed
ENSG00000254531.1	lincRNA	expressed
ENSG00000253671.1	processed_transcript	expressed
ENSG00000269392.1	antisense	non-expressed
ENSG00000256197.1	sense_intronic	non-expressed
ENSG00000214835.3	processed_pseudogene	non-expressed
ENSG00000260086.2	lincRNA	expressed
ENSG00000279685.2	sense_intronic	non-expressed
ENSG00000244278.1	lincRNA	non-expressed
ENSG00000279656.1	TEC	expressed
ENSG00000198983.1	miRNA	non-expressed
ENSG00000171481.3	protein_coding	non-expressed
ENSG00000115523.15	protein_coding	expressed
ENSG00000279786.1	TEC	expressed
ENSG00000132204.12	lincRNA	expressed
ENSG00000257259.1	lincRNA	non-expressed
ENSG00000235040.1	unprocessed_pseudogene	non-expressed
ENSG00000240591.1	antisense	expressed
ENSG00000112576.11	protein_coding	expressed
ENSG00000082068.7	protein_coding	expressed
ENSG00000240993.3	misc_RNA	non-expressed
ENSG00000274685.1	lincRNA	non-expressed
ENSG00000206077.9	protein_coding	expressed
ENSG00000226533.1	antisense	non-expressed
ENSG00000104765.13	protein_coding	expressed
ENSG00000259950.1	processed_pseudogene	non-expressed
ENSG00000230304.1	processed_pseudogene	non-expressed
ENSG00000266276.2	miRNA	non-expressed
ENSG00000171671.6	antisense	non-expressed
ENSG00000259604.4	lincRNA	non-expressed
ENSG00000265043.1	lincRNA	non-expressed
ENSG00000226964.1	processed_pseudogene	expressed
ENSG00000063015.18	protein_coding	expressed
ENSG00000140612.12	protein_coding	expressed
ENSG00000227800.1	IG_D_gene	non-expressed
ENSG00000163482.10	protein_coding	expressed
ENSG00000171401.13	protein_coding	expressed
ENSG00000242668.3	misc_RNA	non-expressed
ENSG00000224914.2	lincRNA	expressed
ENSG00000273117.1	lincRNA	expressed
ENSG00000099715.13	protein_coding	non-expressed
ENSG00000224530.1	processed_pseudogene	non-expressed
ENSG00000263776.1	snoRNA	non-expressed
ENSG00000279174.1	TEC	expressed
ENSG00000277490.1	processed_pseudogene	non-expressed
ENSG00000125845.6	protein_coding	expressed
ENSG00000272909.1	antisense	expressed
ENSG00000236648.1	lincRNA	non-expressed
ENSG00000280953.1	lincRNA	non-expressed
ENSG00000271187.1	processed_pseudogene	non-expressed
ENSG00000252091.1	snRNA	non-expressed
ENSG00000278946.1	antisense	non-expressed
ENSG00000200817.1	snRNA	non-expressed
ENSG00000212378.1	snoRNA	non-expressed
ENSG00000230542.4	lincRNA	non-expressed
ENSG00000272953.1	lincRNA	expressed
ENSG00000233887.1	processed_pseudogene	non-expressed
ENSG00000202398.1	snRNA	non-expressed
ENSG00000206638.1	snRNA	non-expressed
ENSG00000227775.3	transcribed_processed_pseudogene	expressed
ENSG00000087274.15	protein_coding	expressed
ENSG00000162704.14	protein_coding	expressed
ENSG00000249501.1	unprocessed_pseudogene	non-expressed
ENSG00000228392.1	lincRNA	non-expressed
ENSG00000205944.10	protein_coding	non-expressed
ENSG00000183318.10	protein_coding	non-expressed
ENSG00000051180.15	protein_coding	expressed
ENSG00000201218.1	misc_RNA	non-expressed
ENSG00000269243.1	antisense	expressed
ENSG00000258780.1	unprocessed_pseudogene	non-expressed
ENSG00000225559.1	lincRNA	non-expressed
ENSG00000216206.1	miRNA	non-expressed
ENSG00000128564.6	protein_coding	expressed
ENSG00000223907.1	lincRNA	non-expressed
ENSG00000276513.1	miRNA	non-expressed
ENSG00000236511.1	lincRNA	non-expressed
ENSG00000237129.1	processed_pseudogene	non-expressed
ENSG00000239809.1	processed_pseudogene	non-expressed
ENSG00000270075.1	antisense	non-expressed
ENSG00000274584.1	unprocessed_pseudogene	non-expressed
ENSG00000136158.9	protein_coding	expressed
ENSG00000199065.2	miRNA	non-expressed
ENSG00000223244.1	miRNA	non-expressed
ENSG00000142867.11	protein_coding	expressed
ENSG00000261813.2	processed_pseudogene	non-expressed
ENSG00000116830.10	protein_coding	expressed
ENSG00000253561.1	lincRNA	non-expressed
ENSG00000267000.1	antisense	non-expressed
ENSG00000278586.1	processed_pseudogene	non-expressed
ENSG00000230231.1	unprocessed_pseudogene	non-expressed
ENSG00000272182.1	antisense	expressed
ENSG00000176142.11	protein_coding	expressed
ENSG00000243633.3	misc_RNA	non-expressed
ENSG00000255120.4	antisense	expressed
ENSG00000186417.12	protein_coding	expressed
ENSG00000255124.1	lincRNA	non-expressed
ENSG00000229067.1	processed_pseudogene	non-expressed
ENSG00000248564.1	processed_pseudogene	non-expressed
ENSG00000165555.8	protein_coding	expressed
ENSG00000259579.1	lincRNA	non-expressed
ENSG00000261542.1	lincRNA	expressed
ENSG00000227602.1	sense_intronic	non-expressed
ENSG00000225331.1	lincRNA	expressed
ENSG00000233884.1	antisense	non-expressed
ENSG00000240423.1	lincRNA	expressed
ENSG00000222205.1	rRNA	non-expressed
ENSG00000233220.3	lincRNA	non-expressed
ENSG00000143125.5	protein_coding	non-expressed
ENSG00000260276.2	antisense	expressed
ENSG00000220553.1	processed_pseudogene	non-expressed
ENSG00000257766.1	antisense	non-expressed
ENSG00000221385.1	miRNA	non-expressed
ENSG00000248333.6	protein_coding	expressed
ENSG00000112559.12	protein_coding	expressed
ENSG00000235526.1	antisense	non-expressed
ENSG00000250071.1	processed_pseudogene	non-expressed
ENSG00000277854.1	miRNA	non-expressed
ENSG00000207138.1	snRNA	non-expressed
ENSG00000143493.11	protein_coding	expressed
ENSG00000129910.6	protein_coding	expressed
ENSG00000182873.5	antisense	expressed
ENSG00000145604.14	protein_coding	expressed
ENSG00000182901.14	protein_coding	expressed
ENSG00000253267.4	antisense	non-expressed
ENSG00000207518.1	snRNA	non-expressed
ENSG00000186788.11	transcribed_unprocessed_pseudogene	non-expressed
ENSG00000230661.1	processed_pseudogene	non-expressed
ENSG00000225972.1	unprocessed_pseudogene	expressed
ENSG00000266127.1	processed_pseudogene	non-expressed
ENSG00000235369.1	processed_pseudogene	non-expressed
ENSG00000264765.1	lincRNA	non-expressed
ENSG00000266538.1	lincRNA	expressed
ENSG00000253497.1	IG_V_pseudogene	expressed
ENSG00000226014.1	processed_pseudogene	non-expressed
ENSG00000259318.1	processed_pseudogene	expressed
ENSG00000255116.2	processed_pseudogene	non-expressed
ENSG00000275121.1	processed_pseudogene	non-expressed
ENSG00000223442.1	antisense	expressed
ENSG00000243195.1	processed_pseudogene	non-expressed
ENSG00000185842.13	protein_coding	expressed
ENSG00000265428.1	processed_pseudogene	non-expressed
ENSG00000174442.10	protein_coding	expressed
ENSG00000203812.2	protein_coding	non-expressed
ENSG00000266978.1	antisense	non-expressed
ENSG00000229208.1	unprocessed_pseudogene	non-expressed
ENSG00000257588.1	antisense	expressed
ENSG00000260601.1	sense_intronic	non-expressed
ENSG00000280298.1	protein_coding	expressed
ENSG00000221602.1	miRNA	non-expressed
ENSG00000268447.4	protein_coding	non-expressed
ENSG00000162783.10	protein_coding	expressed
ENSG00000126106.12	protein_coding	expressed
ENSG00000254901.6	protein_coding	expressed
ENSG00000268388.4	lincRNA	expressed
ENSG00000274210.1	snRNA	expressed
ENSG00000279390.1	TEC	non-expressed
ENSG00000177551.5	protein_coding	expressed
ENSG00000184863.9	protein_coding	expressed
ENSG00000138069.15	protein_coding	expressed
ENSG00000254361.1	lincRNA	non-expressed
ENSG00000280927.1	antisense	expressed
ENSG00000058272.14	protein_coding	expressed
ENSG00000160460.14	protein_coding	expressed
ENSG00000253559.1	antisense	expressed
ENSG00000141753.6	protein_coding	expressed
ENSG00000278107.1	lincRNA	expressed
ENSG00000127528.5	protein_coding	expressed
ENSG00000236108.1	processed_pseudogene	non-expressed
ENSG00000277144.1	lincRNA	expressed
ENSG00000255583.2	transcribed_unprocessed_pseudogene	expressed
ENSG00000253696.2	lincRNA	non-expressed
ENSG00000200673.1	misc_RNA	non-expressed
ENSG00000174021.9	protein_coding	expressed
ENSG00000234579.1	antisense	non-expressed
ENSG00000275690.1	miRNA	non-expressed
ENSG00000236358.1	antisense	expressed
ENSG00000280607.1	processed_transcript	non-expressed
ENSG00000248984.1	antisense	non-expressed
ENSG00000242329.1	processed_pseudogene	non-expressed
ENSG00000181404.15	protein_coding	expressed
ENSG00000119812.17	protein_coding	expressed
ENSG00000249807.1	lincRNA	non-expressed
ENSG00000260799.1	processed_pseudogene	non-expressed
ENSG00000100258.16	protein_coding	expressed
ENSG00000185668.6	protein_coding	expressed
ENSG00000257139.1	lincRNA	non-expressed
ENSG00000075073.13	protein_coding	expressed
ENSG00000260146.1	processed_pseudogene	non-expressed
ENSG00000198393.6	protein_coding	expressed
ENSG00000231346.4	lincRNA	expressed
ENSG00000215023.2	antisense	non-expressed
ENSG00000232864.1	processed_pseudogene	non-expressed
ENSG00000281190.1	miRNA	non-expressed
ENSG00000125967.15	protein_coding	expressed
ENSG00000277497.1	miRNA	non-expressed
ENSG00000267295.1	unprocessed_pseudogene	non-expressed
ENSG00000232187.1	processed_pseudogene	expressed
ENSG00000278908.1	TEC	non-expressed
ENSG00000280132.1	TEC	expressed
ENSG00000258104.1	processed_pseudogene	non-expressed
ENSG00000206739.1	misc_RNA	non-expressed
ENSG00000229999.5	antisense	non-expressed
ENSG00000171574.16	protein_coding	expressed
ENSG00000278008.1	processed_pseudogene	non-expressed
ENSG00000176281.4	protein_coding	non-expressed
ENSG00000225401.2	transcribed_processed_pseudogene	non-expressed
ENSG00000188859.6	protein_coding	expressed
ENSG00000109255.10	protein_coding	expressed
ENSG00000104946.9	protein_coding	expressed
ENSG00000277302.1	miRNA	non-expressed
ENSG00000233581.1	antisense	non-expressed
ENSG00000143603.17	protein_coding	expressed
ENSG00000163421.7	protein_coding	expressed
ENSG00000232979.1	processed_pseudogene	non-expressed
ENSG00000254792.1	processed_pseudogene	non-expressed
ENSG00000184209.14	protein_coding	expressed
ENSG00000136541.13	protein_coding	expressed
ENSG00000184281.13	protein_coding	expressed
ENSG00000199172.2	miRNA	expressed
ENSG00000281641.1	lincRNA	expressed
ENSG00000274023.1	sense_overlapping	non-expressed
ENSG00000249655.1	antisense	non-expressed
ENSG00000280318.1	TEC	non-expressed
ENSG00000253692.3	IG_C_pseudogene	expressed
ENSG00000142677.3	protein_coding	expressed
ENSG00000275174.1	snRNA	non-expressed
ENSG00000251725.1	miRNA	non-expressed
ENSG00000146223.13	protein_coding	expressed
ENSG00000248971.2	processed_pseudogene	expressed
ENSG00000260042.1	lincRNA	non-expressed
ENSG00000249927.1	processed_pseudogene	non-expressed
ENSG00000251275.1	unprocessed_pseudogene	non-expressed
ENSG00000244024.1	processed_pseudogene	non-expressed
ENSG00000236595.1	processed_pseudogene	non-expressed
ENSG00000279616.1	TEC	non-expressed
ENSG00000239718.1	antisense	non-expressed
ENSG00000251741.1	snRNA	non-expressed
ENSG00000100276.9	protein_coding	expressed
ENSG00000124782.18	protein_coding	expressed
ENSG00000151962.6	protein_coding	expressed
ENSG00000197866.3	unprocessed_pseudogene	non-expressed
ENSG00000168802.11	protein_coding	expressed
ENSG00000237235.2	TR_D_gene	non-expressed
ENSG00000007384.14	protein_coding	expressed
ENSG00000230123.1	unprocessed_pseudogene	non-expressed
ENSG00000232912.4	antisense	expressed
ENSG00000243772.5	protein_coding	expressed
ENSG00000115239.20	protein_coding	expressed
ENSG00000227212.3	processed_pseudogene	expressed
ENSG00000180626.9	protein_coding	expressed
ENSG00000248493.1	processed_pseudogene	non-expressed
ENSG00000240478.1	lincRNA	non-expressed
ENSG00000251078.1	processed_pseudogene	non-expressed
ENSG00000257890.1	lincRNA	non-expressed
ENSG00000258924.4	processed_transcript	non-expressed
ENSG00000207874.1	miRNA	non-expressed
ENSG00000151882.10	protein_coding	expressed
ENSG00000278479.1	miRNA	non-expressed
ENSG00000207180.1	snRNA	non-expressed
ENSG00000172179.10	protein_coding	non-expressed
ENSG00000256774.1	processed_pseudogene	non-expressed
ENSG00000143196.4	protein_coding	expressed
ENSG00000250043.1	lincRNA	non-expressed
ENSG00000207816.1	miRNA	non-expressed
ENSG00000267436.1	antisense	non-expressed
ENSG00000250166.2	lincRNA	non-expressed
ENSG00000267203.1	processed_pseudogene	expressed
ENSG00000281600.1	miRNA	non-expressed
ENSG00000267122.1	antisense	expressed
ENSG00000275994.1	snoRNA	non-expressed
ENSG00000198729.4	protein_coding	expressed
ENSG00000248690.5	antisense	expressed
ENSG00000279182.1	antisense	expressed
ENSG00000163273.3	protein_coding	expressed
ENSG00000200213.1	snRNA	non-expressed
ENSG00000232350.1	unprocessed_pseudogene	non-expressed
ENSG00000221469.1	miRNA	non-expressed
ENSG00000213822.6	protein_coding	non-expressed
ENSG00000279107.1	TEC	non-expressed
ENSG00000273180.1	lincRNA	non-expressed
ENSG00000272023.1	lincRNA	non-expressed
ENSG00000253685.1	unprocessed_pseudogene	non-expressed
ENSG00000199260.1	snRNA	non-expressed
ENSG00000180720.7	protein_coding	expressed
ENSG00000248191.1	processed_pseudogene	non-expressed
ENSG00000240373.1	antisense	non-expressed
ENSG00000180525.11	protein_coding	expressed
ENSG00000217159.2	processed_pseudogene	non-expressed
ENSG00000223275.1	miRNA	non-expressed
ENSG00000221633.2	snoRNA	non-expressed
ENSG00000281389.1	miRNA	non-expressed
ENSG00000249539.1	processed_pseudogene	non-expressed
ENSG00000131100.11	protein_coding	expressed
ENSG00000255171.4	lincRNA	non-expressed
ENSG00000066557.5	protein_coding	expressed
ENSG00000157064.9	protein_coding	expressed
ENSG00000225328.1	antisense	non-expressed
ENSG00000279377.1	TEC	expressed
ENSG00000258369.1	processed_pseudogene	non-expressed
ENSG00000147687.15	protein_coding	expressed
ENSG00000242924.1	lincRNA	non-expressed
ENSG00000206977.1	snoRNA	non-expressed
ENSG00000260563.3	lincRNA	expressed
ENSG00000263628.1	miRNA	non-expressed
ENSG00000186815.11	protein_coding	expressed
ENSG00000134240.10	protein_coding	expressed
ENSG00000269692.1	processed_pseudogene	non-expressed
ENSG00000226337.3	lincRNA	non-expressed
ENSG00000271088.1	processed_pseudogene	non-expressed
ENSG00000166266.12	protein_coding	expressed
ENSG00000225381.2	processed_pseudogene	non-expressed
ENSG00000159377.9	protein_coding	expressed
ENSG00000249312.1	processed_pseudogene	non-expressed
ENSG00000188372.13	protein_coding	expressed
ENSG00000230578.3	transcribed_unprocessed_pseudogene	non-expressed
ENSG00000227244.2	lincRNA	non-expressed
ENSG00000274363.1	lincRNA	expressed
ENSG00000234929.1	lincRNA	expressed
ENSG00000250594.2	processed_pseudogene	non-expressed
ENSG00000070729.12	protein_coding	expressed
ENSG00000115295.18	protein_coding	expressed
ENSG00000243352.3	misc_RNA	non-expressed
ENSG00000235264.1	processed_pseudogene	non-expressed
ENSG00000254342.1	processed_pseudogene	non-expressed
ENSG00000198920.8	protein_coding	expressed
ENSG00000202150.1	snRNA	non-expressed
ENSG00000244342.4	lincRNA	non-expressed
ENSG00000259149.1	lincRNA	non-expressed
ENSG00000212259.1	snRNA	non-expressed
ENSG00000215548.2	unprocessed_pseudogene	expressed
ENSG00000065328.15	protein_coding	expressed
ENSG00000222004.6	lincRNA	non-expressed
ENSG00000161091.11	protein_coding	expressed
ENSG00000263537.2	misc_RNA	non-expressed
ENSG00000238190.1	processed_pseudogene	non-expressed
ENSG00000223377.1	unprocessed_pseudogene	non-expressed
ENSG00000105248.14	protein_coding	expressed
ENSG00000146918.18	protein_coding	expressed
ENSG00000270826.1	processed_pseudogene	non-expressed
ENSG00000188801.9	processed_pseudogene	non-expressed
ENSG00000272109.1	antisense	non-expressed
ENSG00000242266.3	misc_RNA	non-expressed
ENSG00000248672.4	protein_coding	expressed
ENSG00000264007.1	sense_intronic	expressed
ENSG00000262500.1	processed_pseudogene	expressed
ENSG00000112394.15	protein_coding	expressed
ENSG00000279373.1	TEC	non-expressed
ENSG00000274150.1	unprocessed_pseudogene	expressed
ENSG00000255734.1	processed_pseudogene	non-expressed
ENSG00000260316.2	sense_intronic	expressed
ENSG00000186868.14	protein_coding	expressed
ENSG00000201713.1	rRNA	non-expressed
ENSG00000231046.1	antisense	non-expressed
ENSG00000280010.1	TEC	expressed
ENSG00000130312.5	protein_coding	expressed
ENSG00000223547.8	protein_coding	expressed
ENSG00000200377.1	snoRNA	non-expressed
ENSG00000258954.1	lincRNA	non-expressed
ENSG00000176438.11	protein_coding	expressed
ENSG00000174473.14	protein_coding	expressed
ENSG00000125818.16	protein_coding	expressed
ENSG00000223198.1	snRNA	non-expressed
ENSG00000104814.11	protein_coding	expressed
ENSG00000170590.7	lincRNA	non-expressed
ENSG00000108479.10	protein_coding	expressed
ENSG00000104870.11	protein_coding	expressed
ENSG00000181016.8	protein_coding	expressed
ENSG00000141034.8	protein_coding	expressed
ENSG00000277288.2	protein_coding	non-expressed
ENSG00000223403.3	lincRNA	expressed
ENSG00000253266.1	lincRNA	expressed
ENSG00000256092.2	lincRNA	expressed
ENSG00000212100.2	miRNA	non-expressed
ENSG00000239408.1	processed_pseudogene	non-expressed
ENSG00000268605.1	sense_intronic	non-expressed
ENSG00000268970.1	sense_intronic	expressed
ENSG00000245958.5	transcribed_unprocessed_pseudogene	expressed
ENSG00000212133.1	snRNA	non-expressed
ENSG00000232120.1	antisense	non-expressed
ENSG00000066739.10	protein_coding	expressed
ENSG00000244259.1	processed_pseudogene	non-expressed
ENSG00000236267.1	antisense	non-expressed
ENSG00000232537.1	lincRNA	non-expressed
ENSG00000181541.5	protein_coding	expressed
ENSG00000278531.1	unprocessed_pseudogene	expressed
ENSG00000264906.1	miRNA	non-expressed
ENSG00000213523.8	protein_coding	expressed
ENSG00000260662.2	processed_pseudogene	non-expressed
ENSG00000221471.1	miRNA	non-expressed
ENSG00000279410.1	TEC	non-expressed
ENSG00000200702.1	misc_RNA	non-expressed
ENSG00000245750.6	lincRNA	expressed
ENSG00000224351.2	processed_pseudogene	non-expressed
ENSG00000124493.12	protein_coding	expressed
ENSG00000249209.2	protein_coding	non-expressed
ENSG00000243063.1	IG_V_gene	expressed
ENSG00000231166.2	processed_pseudogene	non-expressed
ENSG00000249231.6	lincRNA	non-expressed
ENSG00000206712.1	snRNA	non-expressed
ENSG00000224813.2	transcribed_unprocessed_pseudogene	non-expressed
ENSG00000130707.16	protein_coding	expressed
ENSG00000261522.4	transcribed_unprocessed_pseudogene	non-expressed
ENSG00000227098.1	lincRNA	non-expressed
ENSG00000254987.1	lincRNA	non-expressed
ENSG00000210176.1	Mt_tRNA	non-expressed
ENSG00000259915.2	lincRNA	expressed
ENSG00000253540.4	transcribed_unprocessed_pseudogene	expressed
ENSG00000148908.13	protein_coding	expressed
ENSG00000271290.1	processed_pseudogene	non-expressed
ENSG00000276168.1	misc_RNA	non-expressed
ENSG00000259036.1	antisense	non-expressed
ENSG00000221421.1	miRNA	non-expressed
ENSG00000162692.9	protein_coding	expressed
ENSG00000170379.18	protein_coding	expressed
ENSG00000254175.1	IG_V_pseudogene	non-expressed
ENSG00000215802.3	transcribed_processed_pseudogene	non-expressed
ENSG00000244703.3	unprocessed_pseudogene	non-expressed
ENSG00000274385.1	snRNA	non-expressed
ENSG00000112715.19	protein_coding	expressed
ENSG00000096996.14	protein_coding	expressed
ENSG00000021355.11	protein_coding	expressed
ENSG00000230099.2	TR_V_gene	expressed
ENSG00000249406.1	lincRNA	non-expressed
ENSG00000141098.11	protein_coding	expressed
ENSG00000199620.1	rRNA	non-expressed
ENSG00000272282.1	lincRNA	expressed
ENSG00000182511.10	protein_coding	expressed
ENSG00000258892.1	processed_transcript	non-expressed
ENSG00000250896.1	processed_pseudogene	expressed
ENSG00000237705.1	antisense	non-expressed
ENSG00000216020.2	miRNA	non-expressed
ENSG00000268651.2	protein_coding	non-expressed
ENSG00000250492.1	processed_pseudogene	expressed
ENSG00000227971.1	processed_pseudogene	non-expressed
ENSG00000162374.15	protein_coding	expressed
ENSG00000147081.13	protein_coding	non-expressed
ENSG00000267253.1	processed_pseudogene	expressed
ENSG00000264251.2	misc_RNA	non-expressed
ENSG00000201178.1	misc_RNA	non-expressed
ENSG00000280861.1	miRNA	non-expressed
ENSG00000280021.1	polymorphic_pseudogene	non-expressed
ENSG00000139970.15	protein_coding	expressed
ENSG00000105427.8	protein_coding	expressed
ENSG00000204653.8	protein_coding	expressed
ENSG00000244642.3	misc_RNA	expressed
ENSG00000204983.11	protein_coding	non-expressed
ENSG00000255054.3	protein_coding	non-expressed
ENSG00000222276.1	snRNA	non-expressed
ENSG00000151364.14	protein_coding	expressed
ENSG00000206887.1	snRNA	non-expressed
ENSG00000260152.2	processed_pseudogene	non-expressed
ENSG00000143363.14	protein_coding	expressed
ENSG00000118046.13	protein_coding	expressed
ENSG00000240405.4	lincRNA	non-expressed
ENSG00000257899.1	processed_pseudogene	non-expressed
ENSG00000204949.7	antisense	expressed
ENSG00000277460.1	misc_RNA	non-expressed
ENSG00000254794.1	processed_pseudogene	non-expressed
ENSG00000154856.11	protein_coding	expressed
ENSG00000186174.11	protein_coding	expressed
ENSG00000199698.1	misc_RNA	non-expressed
ENSG00000258028.1	lincRNA	non-expressed
ENSG00000171234.12	protein_coding	expressed
ENSG00000166949.14	protein_coding	expressed
ENSG00000255361.1	processed_pseudogene	non-expressed
ENSG00000085274.14	protein_coding	expressed
ENSG00000259598.1	antisense	non-expressed
ENSG00000227304.3	transcribed_processed_pseudogene	expressed
ENSG00000223265.1	snRNA	non-expressed
ENSG00000199593.1	snoRNA	non-expressed
ENSG00000266595.1	miRNA	non-expressed
ENSG00000115568.14	protein_coding	expressed
ENSG00000261778.1	processed_pseudogene	non-expressed
ENSG00000147421.16	protein_coding	expressed
ENSG00000250983.1	processed_pseudogene	non-expressed
ENSG00000264679.1	miRNA	non-expressed
ENSG00000146618.3	protein_coding	non-expressed
ENSG00000254812.1	antisense	expressed
ENSG00000205593.10	protein_coding	expressed
ENSG00000184110.13	protein_coding	expressed
ENSG00000271848.1	antisense	non-expressed
ENSG00000280687.1	miRNA	non-expressed
ENSG00000236896.1	antisense	non-expressed
ENSG00000137872.14	protein_coding	expressed
ENSG00000278215.1	processed_pseudogene	non-expressed
ENSG00000270961.1	IG_D_gene	non-expressed
ENSG00000145354.8	protein_coding	expressed
ENSG00000265736.1	miRNA	non-expressed
ENSG00000126337.12	protein_coding	expressed
ENSG00000153266.11	protein_coding	non-expressed
ENSG00000272478.1	antisense	non-expressed
ENSG00000242317.1	lincRNA	expressed
ENSG00000276007.1	sense_intronic	expressed
ENSG00000158526.7	protein_coding	expressed
ENSG00000253844.1	lincRNA	non-expressed
ENSG00000279099.1	TEC	non-expressed
ENSG00000275265.1	lincRNA	non-expressed
ENSG00000252342.1	rRNA	non-expressed
ENSG00000265777.2	misc_RNA	non-expressed
ENSG00000262899.1	antisense	non-expressed
ENSG00000105997.21	protein_coding	expressed
ENSG00000185837.3	antisense	expressed
ENSG00000137522.16	protein_coding	expressed
ENSG00000234838.3	processed_pseudogene	expressed
ENSG00000227217.1	antisense	non-expressed
ENSG00000221551.1	miRNA	non-expressed
ENSG00000253935.1	IG_V_pseudogene	non-expressed
ENSG00000251889.1	snRNA	non-expressed
ENSG00000257831.1	antisense	expressed
ENSG00000139209.14	protein_coding	expressed
ENSG00000248870.1	lincRNA	non-expressed
ENSG00000261760.5	lincRNA	expressed
ENSG00000152952.10	protein_coding	expressed
ENSG00000270456.1	processed_pseudogene	non-expressed
ENSG00000076344.14	protein_coding	expressed
ENSG00000206585.1	snRNA	non-expressed
ENSG00000272092.1	lincRNA	expressed
ENSG00000133863.5	protein_coding	expressed
ENSG00000137941.15	protein_coding	expressed
ENSG00000165553.4	protein_coding	expressed
ENSG00000276092.1	sense_intronic	non-expressed
ENSG00000146232.13	protein_coding	expressed
ENSG00000233236.1	lincRNA	non-expressed
ENSG00000165588.15	protein_coding	expressed
ENSG00000087053.17	protein_coding	expressed
ENSG00000250946.2	unprocessed_pseudogene	non-expressed
ENSG00000236709.1	sense_intronic	non-expressed
ENSG00000168894.8	protein_coding	expressed
ENSG00000267106.4	processed_transcript	expressed
ENSG00000251087.3	unprocessed_pseudogene	expressed
ENSG00000165029.14	protein_coding	expressed
ENSG00000248929.1	processed_pseudogene	non-expressed
ENSG00000243704.3	misc_RNA	non-expressed
ENSG00000198284.8	transcribed_processed_pseudogene	non-expressed
ENSG00000250735.4	lincRNA	expressed
ENSG00000268922.1	processed_pseudogene	non-expressed
ENSG00000274010.1	processed_pseudogene	non-expressed
ENSG00000277880.1	TR_V_gene	non-expressed
ENSG00000265357.1	miRNA	non-expressed
ENSG00000255139.1	antisense	expressed
ENSG00000235503.2	antisense	non-expressed
ENSG00000158258.14	protein_coding	expressed
ENSG00000165997.4	protein_coding	expressed
ENSG00000258553.4	antisense	non-expressed
ENSG00000239354.1	processed_pseudogene	non-expressed
ENSG00000213140.3	processed_pseudogene	non-expressed
ENSG00000241269.1	antisense	expressed
ENSG00000203620.2	lincRNA	non-expressed
ENSG00000229951.4	antisense	expressed
ENSG00000185418.14	protein_coding	expressed
ENSG00000157992.11	protein_coding	expressed
ENSG00000200525.1	snRNA	non-expressed
ENSG00000007350.15	protein_coding	expressed
ENSG00000234015.1	lincRNA	non-expressed
ENSG00000251306.1	processed_pseudogene	non-expressed
ENSG00000279012.1	polymorphic_pseudogene	non-expressed
ENSG00000255394.4	lincRNA	expressed
ENSG00000266176.1	lincRNA	expressed
ENSG00000217377.1	processed_pseudogene	non-expressed
ENSG00000227139.1	lincRNA	non-expressed
ENSG00000225582.1	lincRNA	non-expressed
ENSG00000137166.13	protein_coding	expressed
ENSG00000228004.1	processed_pseudogene	non-expressed
ENSG00000251369.7	protein_coding	expressed
ENSG00000261320.1	lincRNA	non-expressed
ENSG00000143353.10	protein_coding	expressed
ENSG00000265681.5	protein_coding	expressed
ENSG00000254002.1	lincRNA	non-expressed
ENSG00000117362.11	protein_coding	expressed
ENSG00000202270.1	snoRNA	non-expressed
ENSG00000263381.1	miRNA	non-expressed
ENSG00000263594.1	lincRNA	non-expressed
ENSG00000130158.12	protein_coding	expressed
ENSG00000275124.1	miRNA	non-expressed
ENSG00000276029.1	miRNA	non-expressed
ENSG00000211691.2	TR_J_gene	non-expressed
ENSG00000252943.1	snRNA	non-expressed
ENSG00000214883.4	unprocessed_pseudogene	non-expressed
ENSG00000252768.1	snRNA	non-expressed
ENSG00000201554.1	misc_RNA	non-expressed
ENSG00000130561.15	protein_coding	expressed
ENSG00000249558.1	processed_pseudogene	non-expressed
ENSG00000267205.1	antisense	non-expressed
ENSG00000255349.1	unprocessed_pseudogene	non-expressed
ENSG00000108342.11	protein_coding	expressed
ENSG00000214207.2	processed_pseudogene	expressed
ENSG00000102977.12	protein_coding	expressed
ENSG00000223500.1	processed_pseudogene	non-expressed
ENSG00000100197.19	protein_coding	expressed
ENSG00000204662.2	unprocessed_pseudogene	non-expressed
ENSG00000265137.2	miRNA	non-expressed
ENSG00000132437.16	protein_coding	expressed
ENSG00000226486.1	lincRNA	non-expressed
ENSG00000126214.19	protein_coding	expressed
ENSG00000206503.10	protein_coding	expressed
ENSG00000163606.9	protein_coding	expressed
ENSG00000249156.1	processed_pseudogene	non-expressed
ENSG00000239827.7	transcribed_unprocessed_pseudogene	expressed
ENSG00000232197.1	antisense	expressed
ENSG00000249639.1	antisense	non-expressed
ENSG00000239168.1	snRNA	non-expressed
ENSG00000005059.14	protein_coding	expressed
ENSG00000180116.14	protein_coding	expressed
ENSG00000238393.1	miRNA	non-expressed
ENSG00000264647.1	antisense	non-expressed
ENSG00000226801.2	processed_pseudogene	non-expressed
ENSG00000199038.1	miRNA	expressed
ENSG00000230289.1	antisense	expressed
ENSG00000147383.9	protein_coding	expressed
ENSG00000229247.2	processed_pseudogene	non-expressed
ENSG00000218536.1	processed_pseudogene	non-expressed
ENSG00000206896.1	snRNA	non-expressed
ENSG00000264484.2	misc_RNA	non-expressed
ENSG00000133475.15	protein_coding	expressed
ENSG00000168374.9	protein_coding	expressed
ENSG00000067225.16	protein_coding	expressed
ENSG00000224812.2	antisense	non-expressed
ENSG00000239185.1	snRNA	non-expressed
ENSG00000171792.9	protein_coding	expressed
ENSG00000252412.1	misc_RNA	expressed
ENSG00000272510.1	antisense	non-expressed
ENSG00000197363.8	protein_coding	expressed
ENSG00000221525.1	miRNA	non-expressed
ENSG00000268282.1	processed_pseudogene	non-expressed
ENSG00000247556.5	processed_transcript	expressed
ENSG00000252362.1	snRNA	non-expressed
ENSG00000235518.2	lincRNA	non-expressed
ENSG00000224516.4	antisense	non-expressed
ENSG00000223554.1	lincRNA	non-expressed
ENSG00000234969.1	processed_pseudogene	expressed
ENSG00000234730.1	lincRNA	non-expressed
ENSG00000231113.2	antisense	expressed
ENSG00000223544.1	unprocessed_pseudogene	non-expressed
ENSG00000083454.20	protein_coding	expressed
ENSG00000254172.1	snRNA	non-expressed
ENSG00000277590.1	miRNA	non-expressed
ENSG00000266160.2	misc_RNA	non-expressed
ENSG00000233928.4	lincRNA	expressed
ENSG00000201586.1	snRNA	non-expressed
ENSG00000155918.6	protein_coding	expressed
ENSG00000106341.9	protein_coding	non-expressed
ENSG00000250506.5	protein_coding	expressed
ENSG00000258204.1	processed_pseudogene	non-expressed
ENSG00000182963.8	protein_coding	expressed
ENSG00000244456.2	transcribed_unprocessed_pseudogene	non-expressed
ENSG00000274985.1	unprocessed_pseudogene	non-expressed
ENSG00000242320.2	processed_pseudogene	non-expressed
ENSG00000278612.1	miRNA	non-expressed
ENSG00000223488.2	processed_pseudogene	non-expressed
ENSG00000253576.1	antisense	non-expressed
ENSG00000202410.1	misc_RNA	non-expressed
ENSG00000272568.4	antisense	expressed
ENSG00000251371.1	lincRNA	non-expressed
ENSG00000228100.1	lincRNA	expressed
ENSG00000235199.1	processed_pseudogene	non-expressed
ENSG00000255163.1	processed_pseudogene	non-expressed
ENSG00000234172.1	lincRNA	non-expressed
ENSG00000238145.2	processed_pseudogene	non-expressed
ENSG00000270531.1	processed_pseudogene	non-expressed
ENSG00000254529.1	unprocessed_pseudogene	non-expressed
ENSG00000070669.15	protein_coding	expressed
ENSG00000254174.1	IG_V_pseudogene	expressed
ENSG00000261066.1	lincRNA	non-expressed
ENSG00000253663.1	processed_pseudogene	non-expressed
ENSG00000255257.1	lincRNA	non-expressed
ENSG00000225003.1	unprocessed_pseudogene	non-expressed
ENSG00000243725.5	protein_coding	expressed
ENSG00000213152.5	processed_pseudogene	expressed
ENSG00000231353.1	unprocessed_pseudogene	non-expressed
ENSG00000229159.1	unprocessed_pseudogene	non-expressed
ENSG00000280581.1	misc_RNA	non-expressed
ENSG00000259255.1	lincRNA	non-expressed
ENSG00000234634.1	lincRNA	non-expressed
ENSG00000226093.1	processed_pseudogene	non-expressed
ENSG00000104731.12	protein_coding	expressed
ENSG00000137574.9	protein_coding	expressed
ENSG00000266952.1	lincRNA	non-expressed
ENSG00000144843.10	protein_coding	expressed
ENSG00000226970.2	processed_pseudogene	expressed
ENSG00000215127.6	transcribed_processed_pseudogene	non-expressed
ENSG00000254781.1	processed_pseudogene	non-expressed
ENSG00000185722.15	protein_coding	expressed
ENSG00000265865.1	miRNA	non-expressed
ENSG00000279283.1	TEC	expressed
ENSG00000005001.8	protein_coding	expressed
ENSG00000235352.1	processed_pseudogene	non-expressed
ENSG00000230498.1	antisense	non-expressed
ENSG00000254469.6	protein_coding	expressed
ENSG00000080709.13	protein_coding	expressed
ENSG00000009694.12	protein_coding	expressed
ENSG00000083457.10	protein_coding	expressed
ENSG00000260528.3	lincRNA	expressed
ENSG00000234861.2	processed_pseudogene	non-expressed
ENSG00000174145.7	protein_coding	expressed
ENSG00000131467.9	protein_coding	expressed
ENSG00000224686.1	processed_pseudogene	non-expressed
ENSG00000256783.1	lincRNA	non-expressed
ENSG00000273653.1	miRNA	non-expressed
ENSG00000280007.1	antisense	expressed
ENSG00000173465.6	protein_coding	expressed
ENSG00000260758.1	lincRNA	non-expressed
ENSG00000164188.7	protein_coding	expressed
ENSG00000102524.10	protein_coding	expressed
ENSG00000227203.3	processed_pseudogene	expressed
ENSG00000225213.2	sense_intronic	expressed
ENSG00000281639.1	miRNA	non-expressed
ENSG00000237171.1	unprocessed_pseudogene	non-expressed
ENSG00000250130.1	processed_pseudogene	expressed
ENSG00000112159.10	protein_coding	expressed
ENSG00000270937.1	lincRNA	non-expressed
ENSG00000221852.4	protein_coding	expressed
ENSG00000256238.1	processed_pseudogene	expressed
ENSG00000252157.1	snRNA	non-expressed
ENSG00000262031.1	lincRNA	non-expressed
ENSG00000254842.5	lincRNA	expressed
ENSG00000281420.1	pseudogene	expressed
ENSG00000225822.4	antisense	non-expressed
ENSG00000260187.1	transcribed_processed_pseudogene	non-expressed
ENSG00000015475.17	protein_coding	expressed
ENSG00000157870.13	protein_coding	expressed
ENSG00000184785.5	protein_coding	expressed
ENSG00000096968.11	protein_coding	expressed
ENSG00000253331.1	lincRNA	non-expressed
ENSG00000262248.1	processed_pseudogene	expressed
ENSG00000197462.3	lincRNA	non-expressed
ENSG00000100749.6	protein_coding	expressed
ENSG00000154229.10	protein_coding	expressed
ENSG00000200783.1	misc_RNA	non-expressed
ENSG00000166478.8	protein_coding	expressed
ENSG00000278878.1	lincRNA	non-expressed
ENSG00000258290.1	processed_pseudogene	non-expressed
ENSG00000180340.6	protein_coding	expressed
ENSG00000274933.3	protein_coding	non-expressed
ENSG00000257231.1	processed_pseudogene	expressed
ENSG00000263749.1	processed_pseudogene	non-expressed
ENSG00000109270.11	protein_coding	expressed
ENSG00000268050.2	antisense	non-expressed
ENSG00000236471.1	lincRNA	non-expressed
ENSG00000196468.7	protein_coding	expressed
ENSG00000198643.5	protein_coding	expressed
ENSG00000233593.5	lincRNA	expressed
ENSG00000232429.3	processed_pseudogene	expressed
ENSG00000221662.1	miRNA	non-expressed
ENSG00000148843.12	protein_coding	expressed
ENSG00000237190.3	protein_coding	expressed
ENSG00000254734.1	lincRNA	non-expressed
ENSG00000198168.7	protein_coding	expressed
ENSG00000116161.16	protein_coding	expressed
ENSG00000116748.18	protein_coding	expressed
ENSG00000249601.2	lincRNA	non-expressed
ENSG00000242829.1	processed_pseudogene	non-expressed
ENSG00000280135.1	TEC	expressed
ENSG00000277613.1	snRNA	non-expressed
ENSG00000265484.1	lincRNA	non-expressed
ENSG00000242522.1	antisense	non-expressed
ENSG00000249026.2	processed_pseudogene	expressed
ENSG00000269186.1	lincRNA	non-expressed
ENSG00000241550.3	misc_RNA	non-expressed
ENSG00000212383.1	snoRNA	non-expressed
ENSG00000277067.3	lincRNA	non-expressed
ENSG00000259645.1	sense_intronic	non-expressed
ENSG00000183309.10	protein_coding	expressed
ENSG00000253889.1	IG_V_pseudogene	non-expressed
ENSG00000106245.8	protein_coding	expressed
ENSG00000200170.1	misc_RNA	expressed
ENSG00000175279.20	protein_coding	expressed
ENSG00000216938.3	processed_pseudogene	non-expressed
ENSG00000236468.1	processed_pseudogene	expressed
ENSG00000110107.7	protein_coding	expressed
ENSG00000165591.6	protein_coding	expressed
ENSG00000224765.1	antisense	non-expressed
ENSG00000275413.1	antisense	expressed
ENSG00000259696.2	processed_pseudogene	non-expressed
ENSG00000253808.1	IG_V_pseudogene	non-expressed
ENSG00000168067.10	protein_coding	expressed
ENSG00000167100.13	protein_coding	expressed
ENSG00000251602.5	antisense	expressed
ENSG00000236978.1	processed_pseudogene	non-expressed
ENSG00000145824.11	protein_coding	expressed
ENSG00000102195.8	protein_coding	expressed
ENSG00000228084.1	antisense	expressed
ENSG00000276093.1	lincRNA	expressed
ENSG00000248559.1	antisense	expressed
ENSG00000124181.13	protein_coding	expressed
ENSG00000196274.5	misc_RNA	expressed
ENSG00000029364.10	protein_coding	expressed
ENSG00000254931.2	processed_pseudogene	non-expressed
ENSG00000230239.1	lincRNA	non-expressed
ENSG00000213070.3	processed_pseudogene	non-expressed
ENSG00000263220.1	antisense	non-expressed
ENSG00000121388.5	unprocessed_pseudogene	non-expressed
ENSG00000169062.13	protein_coding	expressed
ENSG00000273450.1	antisense	expressed
ENSG00000207933.2	miRNA	non-expressed
ENSG00000274343.1	processed_pseudogene	non-expressed
ENSG00000233259.4	processed_pseudogene	non-expressed
ENSG00000120253.12	protein_coding	expressed
ENSG00000235089.1	processed_pseudogene	non-expressed
ENSG00000251517.1	lincRNA	expressed
ENSG00000099889.12	protein_coding	expressed
ENSG00000140090.16	protein_coding	expressed
ENSG00000241622.1	processed_pseudogene	non-expressed
ENSG00000150526.10	protein_coding	non-expressed
ENSG00000278764.1	misc_RNA	non-expressed
ENSG00000106628.9	protein_coding	expressed
ENSG00000259708.1	antisense	non-expressed
ENSG00000272368.2	antisense	expressed
ENSG00000103534.15	protein_coding	expressed
ENSG00000198042.9	protein_coding	expressed
ENSG00000259602.1	antisense	non-expressed
ENSG00000228430.7	lincRNA	non-expressed
ENSG00000239911.2	antisense	expressed
ENSG00000139289.12	protein_coding	expressed
ENSG00000197171.5	unprocessed_pseudogene	non-expressed
ENSG00000231219.1	unprocessed_pseudogene	non-expressed
ENSG00000238088.1	unprocessed_pseudogene	non-expressed
ENSG00000250722.4	protein_coding	expressed
ENSG00000226833.4	antisense	expressed
ENSG00000257042.1	antisense	expressed
ENSG00000239555.3	misc_RNA	non-expressed
ENSG00000072832.13	protein_coding	expressed
ENSG00000197050.9	protein_coding	expressed
ENSG00000267659.4	lincRNA	expressed
ENSG00000263809.1	protein_coding	expressed
ENSG00000279671.1	TEC	non-expressed
ENSG00000280396.1	TEC	non-expressed
ENSG00000177352.9	protein_coding	expressed
ENSG00000273096.1	sense_intronic	expressed
ENSG00000102007.9	protein_coding	expressed
ENSG00000269321.1	antisense	non-expressed
ENSG00000226643.2	lincRNA	non-expressed
ENSG00000231987.1	lincRNA	non-expressed
ENSG00000152784.14	protein_coding	expressed
ENSG00000228700.1	processed_pseudogene	non-expressed
ENSG00000254705.1	antisense	non-expressed
ENSG00000262470.2	transcribed_processed_pseudogene	non-expressed
ENSG00000265975.1	lincRNA	expressed
ENSG00000249722.1	lincRNA	non-expressed
ENSG00000230162.1	unprocessed_pseudogene	non-expressed
ENSG00000176160.8	protein_coding	expressed
ENSG00000223402.1	processed_pseudogene	non-expressed
ENSG00000271532.1	processed_pseudogene	non-expressed
ENSG00000169139.10	protein_coding	expressed
ENSG00000273170.4	protein_coding	expressed
ENSG00000199158.1	miRNA	non-expressed
ENSG00000232442.1	antisense	expressed
ENSG00000231873.1	lincRNA	non-expressed
ENSG00000164898.11	protein_coding	expressed
ENSG00000161800.11	protein_coding	expressed
ENSG00000253717.1	lincRNA	non-expressed
ENSG00000200139.1	snRNA	non-expressed
ENSG00000163945.14	protein_coding	expressed
ENSG00000259482.1	antisense	non-expressed
ENSG00000251218.1	lincRNA	non-expressed
ENSG00000159496.13	protein_coding	expressed
ENSG00000233308.1	antisense	non-expressed
ENSG00000270379.4	protein_coding	expressed
ENSG00000155052.14	protein_coding	expressed
ENSG00000171757.14	protein_coding	expressed
ENSG00000222631.3	miRNA	non-expressed
ENSG00000260185.1	antisense	non-expressed
ENSG00000262601.1	lincRNA	expressed
ENSG00000243832.1	lincRNA	non-expressed
ENSG00000273699.1	miRNA	non-expressed
ENSG00000256947.1	antisense	non-expressed
ENSG00000270890.1	processed_pseudogene	expressed
ENSG00000276527.1	lincRNA	expressed
ENSG00000225761.1	sense_intronic	non-expressed
ENSG00000102595.17	protein_coding	expressed
ENSG00000259037.1	antisense	non-expressed
ENSG00000134207.13	protein_coding	expressed
ENSG00000230376.1	processed_pseudogene	non-expressed
ENSG00000170214.3	protein_coding	expressed
ENSG00000227361.1	processed_pseudogene	expressed
ENSG00000198723.9	protein_coding	expressed
ENSG00000100316.14	protein_coding	expressed
ENSG00000236184.1	processed_pseudogene	expressed
ENSG00000261191.1	antisense	non-expressed
ENSG00000080007.7	protein_coding	expressed
ENSG00000274934.1	misc_RNA	non-expressed
ENSG00000120868.12	protein_coding	expressed
ENSG00000233817.1	lincRNA	expressed
ENSG00000275656.1	misc_RNA	non-expressed
ENSG00000252133.1	snoRNA	non-expressed
ENSG00000230734.1	processed_pseudogene	expressed
ENSG00000262158.1	unprocessed_pseudogene	non-expressed
ENSG00000234740.1	sense_intronic	non-expressed
ENSG00000196850.5	protein_coding	expressed
ENSG00000166848.5	protein_coding	expressed
ENSG00000224520.2	processed_pseudogene	expressed
ENSG00000201778.1	misc_RNA	non-expressed
ENSG00000266006.1	miRNA	non-expressed
ENSG00000258781.2	unprocessed_pseudogene	non-expressed
ENSG00000240032.1	antisense	expressed
ENSG00000237609.1	lincRNA	expressed
ENSG00000272944.1	antisense	expressed
ENSG00000174485.13	protein_coding	expressed
ENSG00000176232.10	unprocessed_pseudogene	non-expressed
ENSG00000226193.1	antisense	non-expressed
ENSG00000268296.1	lincRNA	non-expressed
ENSG00000272788.1	sense_intronic	expressed
ENSG00000228958.1	processed_pseudogene	non-expressed
ENSG00000239620.1	processed_pseudogene	expressed
ENSG00000274631.1	processed_pseudogene	non-expressed
ENSG00000232855.5	lincRNA	expressed
ENSG00000249437.6	protein_coding	expressed
ENSG00000152213.3	protein_coding	expressed
ENSG00000253055.1	rRNA	non-expressed
ENSG00000232545.1	sense_intronic	expressed
ENSG00000266288.1	lincRNA	non-expressed
ENSG00000198825.10	protein_coding	expressed
ENSG00000279123.1	TEC	expressed
ENSG00000277662.1	sense_intronic	expressed
ENSG00000223866.1	processed_pseudogene	non-expressed
ENSG00000225572.1	antisense	non-expressed
ENSG00000204344.13	protein_coding	expressed
ENSG00000253441.1	IG_V_pseudogene	expressed
ENSG00000186469.7	protein_coding	expressed
ENSG00000270696.1	antisense	expressed
ENSG00000234224.2	protein_coding	non-expressed
ENSG00000216676.2	processed_pseudogene	expressed
ENSG00000212561.1	snRNA	non-expressed
ENSG00000264658.1	miRNA	non-expressed
ENSG00000253956.1	lincRNA	non-expressed
ENSG00000251287.7	protein_coding	expressed
ENSG00000167701.12	protein_coding	expressed
ENSG00000204933.3	unprocessed_pseudogene	expressed
ENSG00000268505.1	lincRNA	non-expressed
ENSG00000259268.1	lincRNA	non-expressed
ENSG00000280799.1	unprocessed_pseudogene	non-expressed
ENSG00000276564.1	lincRNA	expressed
ENSG00000264911.1	processed_pseudogene	non-expressed
ENSG00000072135.11	protein_coding	expressed
ENSG00000110321.14	protein_coding	expressed
ENSG00000079739.14	protein_coding	expressed
ENSG00000019991.14	protein_coding	expressed
ENSG00000183668.16	protein_coding	expressed
ENSG00000154146.11	protein_coding	expressed
ENSG00000254973.1	lincRNA	expressed
ENSG00000174123.9	protein_coding	expressed
ENSG00000221074.1	miRNA	non-expressed
ENSG00000214903.4	processed_pseudogene	non-expressed
ENSG00000232627.1	processed_pseudogene	non-expressed
ENSG00000254017.1	IG_C_pseudogene	expressed
ENSG00000126264.8	protein_coding	expressed
ENSG00000214878.2	processed_pseudogene	non-expressed
ENSG00000224809.2	processed_pseudogene	non-expressed
ENSG00000180011.6	protein_coding	expressed
ENSG00000265737.1	antisense	non-expressed
ENSG00000279054.1	protein_coding	non-expressed
ENSG00000122484.8	protein_coding	expressed
ENSG00000264500.1	miRNA	non-expressed
ENSG00000279106.1	TEC	non-expressed
ENSG00000200040.1	misc_RNA	non-expressed
ENSG00000241654.1	processed_pseudogene	non-expressed
ENSG00000279604.1	TEC	non-expressed
ENSG00000136059.13	protein_coding	expressed
ENSG00000230484.2	unitary_pseudogene	non-expressed
ENSG00000233262.1	antisense	non-expressed
ENSG00000266203.1	miRNA	non-expressed
ENSG00000248551.1	lincRNA	non-expressed
ENSG00000267137.1	antisense	non-expressed
ENSG00000253526.1	lincRNA	non-expressed
ENSG00000215845.9	protein_coding	expressed
ENSG00000276252.1	miRNA	non-expressed
ENSG00000256011.1	antisense	non-expressed
ENSG00000223273.1	misc_RNA	non-expressed
ENSG00000276056.1	miRNA	non-expressed
ENSG00000178750.2	protein_coding	expressed
ENSG00000235843.1	antisense	non-expressed
ENSG00000258845.1	lincRNA	non-expressed
ENSG00000224781.1	processed_pseudogene	expressed
ENSG00000228056.3	processed_pseudogene	non-expressed
ENSG00000280731.1	miRNA	non-expressed
ENSG00000188153.11	protein_coding	expressed
ENSG00000255776.1	processed_pseudogene	non-expressed
ENSG00000234427.1	lincRNA	expressed
ENSG00000279717.1	TEC	non-expressed
ENSG00000264288.1	miRNA	non-expressed
ENSG00000101470.8	protein_coding	expressed
ENSG00000232671.4	antisense	expressed
ENSG00000177023.2	protein_coding	non-expressed
ENSG00000247595.2	processed_transcript	expressed
ENSG00000220157.4	processed_pseudogene	expressed
ENSG00000270435.1	processed_pseudogene	non-expressed
ENSG00000185825.14	protein_coding	expressed
ENSG00000053501.11	protein_coding	expressed
ENSG00000253768.1	lincRNA	expressed
ENSG00000267653.1	lincRNA	non-expressed
ENSG00000196248.4	protein_coding	non-expressed
ENSG00000111049.3	protein_coding	expressed
ENSG00000204832.8	antisense	expressed
ENSG00000258380.1	antisense	non-expressed
ENSG00000106723.15	protein_coding	expressed
ENSG00000255067.1	sense_intronic	non-expressed
ENSG00000270293.1	processed_pseudogene	non-expressed
ENSG00000140107.10	protein_coding	expressed
ENSG00000221065.1	miRNA	non-expressed
ENSG00000116525.12	protein_coding	expressed
ENSG00000206800.1	misc_RNA	non-expressed
ENSG00000220537.1	processed_pseudogene	non-expressed
ENSG00000279200.1	TEC	non-expressed
ENSG00000254858.8	protein_coding	expressed
ENSG00000200645.1	snRNA	non-expressed
ENSG00000165917.8	protein_coding	expressed
ENSG00000160766.13	transcribed_unprocessed_pseudogene	expressed
ENSG00000199480.1	rRNA	non-expressed
ENSG00000167165.17	protein_coding	expressed
ENSG00000153291.14	protein_coding	expressed
ENSG00000252978.1	misc_RNA	non-expressed
ENSG00000273763.1	processed_pseudogene	expressed
ENSG00000270526.1	processed_pseudogene	non-expressed
ENSG00000265493.1	miRNA	non-expressed
ENSG00000177669.3	protein_coding	expressed
ENSG00000198298.11	protein_coding	expressed
ENSG00000240970.1	processed_pseudogene	expressed
ENSG00000180139.11	antisense	expressed
ENSG00000120471.13	protein_coding	expressed
ENSG00000277127.1	misc_RNA	non-expressed
ENSG00000252854.1	misc_RNA	non-expressed
ENSG00000224537.1	unprocessed_pseudogene	non-expressed
ENSG00000120306.8	protein_coding	expressed
ENSG00000270911.1	processed_pseudogene	non-expressed
ENSG00000167088.9	protein_coding	expressed
ENSG00000204887.4	protein_coding	non-expressed
ENSG00000264693.1	lincRNA	non-expressed
ENSG00000074695.5	protein_coding	expressed
ENSG00000214255.5	processed_pseudogene	non-expressed
ENSG00000092377.12	protein_coding	expressed
ENSG00000180767.8	protein_coding	expressed
ENSG00000214176.8	transcribed_unprocessed_pseudogene	expressed
ENSG00000263307.1	antisense	expressed
ENSG00000273295.1	lincRNA	expressed
ENSG00000173093.11	protein_coding	expressed
ENSG00000089693.9	protein_coding	expressed
ENSG00000280194.1	TEC	expressed
ENSG00000088970.14	protein_coding	expressed
ENSG00000183876.8	protein_coding	expressed
ENSG00000264779.1	miRNA	non-expressed
ENSG00000252601.1	snoRNA	non-expressed
ENSG00000252357.1	misc_RNA	non-expressed
ENSG00000148925.9	protein_coding	expressed
ENSG00000230476.1	unprocessed_pseudogene	non-expressed
ENSG00000213213.12	protein_coding	expressed
ENSG00000104093.12	protein_coding	expressed
ENSG00000251435.1	processed_pseudogene	non-expressed
ENSG00000225764.1	antisense	expressed
ENSG00000255976.1	processed_pseudogene	non-expressed
ENSG00000280063.1	TEC	expressed
ENSG00000233869.1	processed_pseudogene	non-expressed
ENSG00000264429.1	miRNA	non-expressed
ENSG00000185304.13	protein_coding	expressed
ENSG00000207116.1	snRNA	non-expressed
ENSG00000251035.1	processed_pseudogene	non-expressed
ENSG00000074266.16	protein_coding	expressed
ENSG00000156574.8	protein_coding	expressed
ENSG00000248256.1	antisense	expressed
ENSG00000214702.6	unprocessed_pseudogene	non-expressed
ENSG00000266481.1	miRNA	non-expressed
ENSG00000232949.1	antisense	non-expressed
ENSG00000115233.10	protein_coding	expressed
ENSG00000214290.6	protein_coding	expressed
ENSG00000270661.1	lincRNA	non-expressed
ENSG00000211866.1	TR_J_gene	non-expressed
ENSG00000239605.7	protein_coding	expressed
ENSG00000259660.2	transcribed_unprocessed_pseudogene	expressed
ENSG00000197838.4	protein_coding	expressed
ENSG00000127946.15	protein_coding	expressed
ENSG00000197576.12	protein_coding	expressed
ENSG00000248533.1	lincRNA	non-expressed
ENSG00000270139.1	lincRNA	non-expressed
ENSG00000271046.1	lincRNA	expressed
ENSG00000053918.14	protein_coding	expressed
ENSG00000226461.3	unprocessed_pseudogene	non-expressed
ENSG00000215183.4	protein_coding	non-expressed
ENSG00000258308.4	lincRNA	non-expressed
ENSG00000089006.15	protein_coding	expressed
ENSG00000234262.1	unprocessed_pseudogene	expressed
ENSG00000277939.1	miRNA	non-expressed
ENSG00000200887.1	snRNA	non-expressed
ENSG00000149633.10	protein_coding	expressed
ENSG00000257365.6	protein_coding	expressed
ENSG00000185650.9	protein_coding	expressed
ENSG00000202159.1	snRNA	non-expressed
ENSG00000254741.1	antisense	non-expressed
ENSG00000278393.1	miRNA	non-expressed
ENSG00000221347.1	miRNA	non-expressed
ENSG00000264340.1	antisense	non-expressed
ENSG00000132842.12	protein_coding	expressed
ENSG00000167748.9	protein_coding	expressed
ENSG00000211482.1	miRNA	non-expressed
ENSG00000224078.11	processed_transcript	expressed
ENSG00000200281.1	snRNA	non-expressed
ENSG00000233061.1	sense_intronic	non-expressed
ENSG00000254568.1	antisense	non-expressed
ENSG00000237941.2	antisense	non-expressed
ENSG00000137807.12	protein_coding	expressed
ENSG00000231566.1	lincRNA	expressed
ENSG00000201761.1	snRNA	non-expressed
ENSG00000100302.6	protein_coding	expressed
ENSG00000254066.1	lincRNA	non-expressed
ENSG00000235333.3	transcribed_unprocessed_pseudogene	non-expressed
ENSG00000207475.1	snoRNA	non-expressed
ENSG00000248850.1	processed_pseudogene	non-expressed
ENSG00000143740.13	protein_coding	expressed
ENSG00000274622.2	miRNA	non-expressed
ENSG00000224563.1	antisense	non-expressed
ENSG00000277810.1	miRNA	non-expressed
ENSG00000163046.14	protein_coding	non-expressed
ENSG00000116001.14	protein_coding	expressed
ENSG00000198947.13	protein_coding	expressed
ENSG00000225006.1	lincRNA	non-expressed
ENSG00000275014.1	misc_RNA	non-expressed
ENSG00000229917.2	processed_pseudogene	non-expressed
ENSG00000149218.4	protein_coding	expressed
ENSG00000237702.2	TR_V_gene	expressed
ENSG00000215223.3	processed_pseudogene	non-expressed
ENSG00000226779.1	antisense	expressed
ENSG00000218227.3	processed_pseudogene	expressed
ENSG00000008517.15	protein_coding	expressed
ENSG00000260259.1	lincRNA	expressed
ENSG00000272096.2	misc_RNA	non-expressed
ENSG00000233126.3	processed_pseudogene	non-expressed
ENSG00000226771.1	antisense	non-expressed
ENSG00000201113.1	snRNA	non-expressed
ENSG00000221438.1	miRNA	non-expressed
ENSG00000137074.17	protein_coding	expressed
ENSG00000179598.5	protein_coding	expressed
ENSG00000257103.7	protein_coding	expressed
ENSG00000205730.6	protein_coding	expressed
ENSG00000267465.5	lincRNA	non-expressed
ENSG00000240777.2	lincRNA	non-expressed
ENSG00000114853.12	protein_coding	expressed
ENSG00000102003.9	protein_coding	expressed
ENSG00000234497.4	antisense	non-expressed
ENSG00000223878.1	processed_pseudogene	expressed
ENSG00000202269.1	snoRNA	non-expressed
ENSG00000158850.13	protein_coding	expressed
ENSG00000206888.1	snRNA	non-expressed
ENSG00000231305.3	antisense	expressed
ENSG00000215399.2	processed_pseudogene	non-expressed
ENSG00000255549.2	unprocessed_pseudogene	non-expressed
ENSG00000215149.3	processed_pseudogene	non-expressed
ENSG00000238131.1	lincRNA	non-expressed
ENSG00000279067.1	TEC	non-expressed
ENSG00000196917.5	protein_coding	expressed
ENSG00000204315.3	protein_coding	expressed
ENSG00000223704.1	lincRNA	expressed
ENSG00000233447.1	unprocessed_pseudogene	non-expressed
ENSG00000166509.9	protein_coding	non-expressed
ENSG00000201638.2	misc_RNA	non-expressed
ENSG00000242659.1	lincRNA	expressed
ENSG00000255690.2	protein_coding	expressed
ENSG00000201492.1	rRNA	non-expressed
ENSG00000200537.1	misc_RNA	non-expressed
ENSG00000198944.5	protein_coding	expressed
ENSG00000249951.1	lincRNA	non-expressed
ENSG00000258524.1	processed_pseudogene	non-expressed
ENSG00000135862.5	protein_coding	expressed
ENSG00000275727.1	miRNA	non-expressed
ENSG00000017427.14	protein_coding	expressed
ENSG00000263618.4	lincRNA	non-expressed
ENSG00000168619.14	protein_coding	non-expressed
ENSG00000278370.1	lincRNA	non-expressed
ENSG00000203858.3	unprocessed_pseudogene	non-expressed
ENSG00000250242.1	lincRNA	non-expressed
ENSG00000158050.4	protein_coding	expressed
ENSG00000242550.4	protein_coding	expressed
ENSG00000159069.12	protein_coding	expressed
ENSG00000252454.2	miRNA	non-expressed
ENSG00000181395.6	pseudogene	non-expressed
ENSG00000127914.15	protein_coding	expressed
ENSG00000232884.6	lincRNA	expressed
ENSG00000242477.1	processed_pseudogene	expressed
ENSG00000257905.1	processed_pseudogene	expressed
ENSG00000274180.1	protein_coding	expressed
ENSG00000277299.1	antisense	expressed
ENSG00000274222.1	miRNA	non-expressed
ENSG00000171310.9	protein_coding	expressed
ENSG00000235303.1	lincRNA	non-expressed
ENSG00000274770.1	miRNA	non-expressed
ENSG00000269388.1	transcribed_processed_pseudogene	expressed
ENSG00000167526.12	protein_coding	expressed
ENSG00000229965.1	processed_pseudogene	expressed
ENSG00000171714.10	protein_coding	expressed
ENSG00000235776.2	processed_pseudogene	expressed
ENSG00000259186.1	processed_pseudogene	non-expressed
ENSG00000204657.3	protein_coding	non-expressed
ENSG00000279297.1	TEC	non-expressed
ENSG00000164331.8	protein_coding	expressed
ENSG00000275833.1	unprocessed_pseudogene	non-expressed
ENSG00000272692.1	lincRNA	expressed
ENSG00000214067.2	processed_pseudogene	non-expressed
ENSG00000281887.1	protein_coding	non-expressed
ENSG00000228373.2	processed_pseudogene	non-expressed
ENSG00000101310.13	protein_coding	expressed
ENSG00000272798.1	lincRNA	non-expressed
ENSG00000125107.15	protein_coding	expressed
ENSG00000237682.2	processed_pseudogene	non-expressed
ENSG00000202434.1	snoRNA	non-expressed
ENSG00000153303.15	protein_coding	expressed
ENSG00000251834.1	snRNA	non-expressed
ENSG00000182704.7	protein_coding	expressed
ENSG00000267874.1	sense_intronic	non-expressed
ENSG00000240309.1	processed_pseudogene	non-expressed
ENSG00000135222.6	protein_coding	non-expressed
ENSG00000158125.8	protein_coding	expressed
ENSG00000101892.10	protein_coding	expressed
ENSG00000256025.1	antisense	non-expressed
ENSG00000200274.1	snRNA	non-expressed
ENSG00000162368.12	protein_coding	expressed
ENSG00000275070.1	misc_RNA	expressed
ENSG00000105270.13	protein_coding	expressed
ENSG00000272237.1	snoRNA	non-expressed
ENSG00000268912.1	lincRNA	expressed
ENSG00000160202.6	protein_coding	non-expressed
ENSG00000234886.1	processed_pseudogene	non-expressed
ENSG00000212593.1	snoRNA	non-expressed
ENSG00000235565.1	lincRNA	expressed
ENSG00000204308.7	protein_coding	expressed
ENSG00000275693.1	misc_RNA	non-expressed
ENSG00000230294.4	lincRNA	non-expressed
ENSG00000126903.14	protein_coding	expressed
ENSG00000174165.6	protein_coding	expressed
ENSG00000234864.1	lincRNA	non-expressed
ENSG00000255076.2	sense_intronic	non-expressed
ENSG00000143751.9	protein_coding	expressed
ENSG00000150676.11	protein_coding	non-expressed
ENSG00000277125.1	unprocessed_pseudogene	non-expressed
ENSG00000178596.10	processed_pseudogene	non-expressed
ENSG00000222744.1	misc_RNA	non-expressed
ENSG00000253554.4	antisense	expressed
ENSG00000204429.4	processed_pseudogene	expressed
ENSG00000225809.1	unprocessed_pseudogene	non-expressed
ENSG00000277008.1	unprocessed_pseudogene	non-expressed
ENSG00000111254.6	protein_coding	expressed
ENSG00000243669.2	processed_pseudogene	non-expressed
ENSG00000110871.13	protein_coding	expressed
ENSG00000263326.1	unprocessed_pseudogene	expressed
ENSG00000271691.1	unprocessed_pseudogene	non-expressed
ENSG00000266711.1	antisense	non-expressed
ENSG00000231169.4	processed_pseudogene	expressed
ENSG00000257582.4	lincRNA	expressed
ENSG00000258450.1	sense_intronic	expressed
ENSG00000171657.5	protein_coding	expressed
ENSG00000265883.1	processed_pseudogene	non-expressed
ENSG00000204092.2	lincRNA	non-expressed
ENSG00000142798.15	protein_coding	expressed
ENSG00000241074.3	misc_RNA	non-expressed
ENSG00000272129.1	lincRNA	expressed
ENSG00000234756.1	lincRNA	expressed
ENSG00000232946.1	processed_pseudogene	expressed
ENSG00000258136.1	antisense	expressed
ENSG00000214684.2	processed_pseudogene	non-expressed
ENSG00000259009.4	unprocessed_pseudogene	non-expressed
ENSG00000248766.2	processed_pseudogene	non-expressed
ENSG00000258375.2	processed_pseudogene	non-expressed
ENSG00000271121.2	processed_pseudogene	non-expressed
ENSG00000242082.1	antisense	expressed
ENSG00000280272.1	TEC	non-expressed
ENSG00000151422.11	protein_coding	expressed
ENSG00000079263.17	protein_coding	expressed
ENSG00000174576.7	protein_coding	expressed
ENSG00000183878.14	protein_coding	expressed
ENSG00000259861.1	lincRNA	non-expressed
ENSG00000226450.2	unprocessed_pseudogene	expressed
ENSG00000228074.1	processed_pseudogene	expressed
ENSG00000230801.1	processed_pseudogene	non-expressed
ENSG00000234464.1	lincRNA	non-expressed
ENSG00000237480.1	lincRNA	non-expressed
ENSG00000222397.1	misc_RNA	non-expressed
ENSG00000163531.14	protein_coding	expressed
ENSG00000216904.2	processed_pseudogene	non-expressed
ENSG00000239998.4	protein_coding	expressed
ENSG00000211942.3	IG_V_gene	expressed
ENSG00000233264.2	processed_pseudogene	expressed
ENSG00000162980.15	protein_coding	expressed
ENSG00000206958.1	snoRNA	non-expressed
ENSG00000112855.13	protein_coding	expressed
ENSG00000265073.1	antisense	non-expressed
ENSG00000278076.1	miRNA	non-expressed
ENSG00000162402.11	protein_coding	expressed
ENSG00000277483.1	misc_RNA	non-expressed
ENSG00000201747.1	snRNA	non-expressed
ENSG00000101191.15	protein_coding	expressed
ENSG00000237743.3	transcribed_unprocessed_pseudogene	non-expressed
ENSG00000279541.1	TEC	expressed
ENSG00000146926.9	protein_coding	expressed
ENSG00000265752.2	lincRNA	expressed
ENSG00000178934.4	protein_coding	expressed
ENSG00000233684.2	lincRNA	non-expressed
ENSG00000263707.1	antisense	non-expressed
ENSG00000136213.9	protein_coding	expressed
ENSG00000259781.1	processed_pseudogene	expressed
ENSG00000010810.16	protein_coding	expressed
ENSG00000153048.9	protein_coding	expressed
ENSG00000234257.1	processed_pseudogene	non-expressed
ENSG00000261039.2	lincRNA	expressed
ENSG00000124212.5	protein_coding	expressed
ENSG00000124406.15	protein_coding	expressed
ENSG00000120699.11	protein_coding	expressed
ENSG00000211912.1	IG_D_gene	non-expressed
ENSG00000280122.1	TEC	non-expressed
ENSG00000186479.4	protein_coding	expressed
ENSG00000123066.6	protein_coding	expressed
ENSG00000221424.1	miRNA	non-expressed
ENSG00000224209.5	lincRNA	expressed
ENSG00000144827.7	protein_coding	expressed
ENSG00000272832.1	lincRNA	non-expressed
ENSG00000270093.1	lincRNA	expressed
ENSG00000164488.10	protein_coding	expressed
ENSG00000258036.1	unprocessed_pseudogene	non-expressed
ENSG00000265631.1	processed_pseudogene	non-expressed
ENSG00000256294.6	protein_coding	expressed
ENSG00000206931.1	snRNA	non-expressed
ENSG00000200693.2	snoRNA	expressed
ENSG00000211683.3	processed_transcript	expressed
ENSG00000266656.1	miRNA	non-expressed
ENSG00000258408.1	processed_pseudogene	non-expressed
ENSG00000262663.1	lincRNA	expressed
ENSG00000201707.1	snRNA	non-expressed
ENSG00000170325.13	protein_coding	expressed
ENSG00000267162.1	processed_pseudogene	non-expressed
ENSG00000199153.1	miRNA	non-expressed
ENSG00000224204.1	antisense	non-expressed
ENSG00000103460.15	protein_coding	expressed
ENSG00000188334.3	protein_coding	non-expressed
ENSG00000182591.5	protein_coding	expressed
ENSG00000277592.1	misc_RNA	non-expressed
ENSG00000249038.2	processed_pseudogene	non-expressed
ENSG00000259621.1	antisense	non-expressed
ENSG00000271049.1	processed_pseudogene	non-expressed
ENSG00000269927.1	lincRNA	expressed
ENSG00000206858.1	misc_RNA	non-expressed
ENSG00000241064.3	misc_RNA	non-expressed
ENSG00000229528.1	antisense	non-expressed
ENSG00000264879.2	misc_RNA	non-expressed
ENSG00000239393.1	processed_pseudogene	non-expressed
ENSG00000240821.1	processed_pseudogene	non-expressed
ENSG00000266666.1	miRNA	non-expressed
ENSG00000250427.1	lincRNA	non-expressed
ENSG00000250486.3	protein_coding	expressed
ENSG00000244649.3	lincRNA	expressed
ENSG00000083838.14	protein_coding	expressed
ENSG00000134255.12	protein_coding	expressed
ENSG00000165355.7	protein_coding	expressed
ENSG00000189013.13	protein_coding	expressed
ENSG00000101000.4	protein_coding	expressed
ENSG00000263990.1	lincRNA	expressed
ENSG00000279946.1	TEC	non-expressed
ENSG00000115947.12	protein_coding	expressed
ENSG00000230445.4	transcribed_processed_pseudogene	expressed
ENSG00000254538.1	lincRNA	non-expressed
ENSG00000227745.1	unprocessed_pseudogene	non-expressed
ENSG00000239333.3	misc_RNA	non-expressed
ENSG00000252661.1	snRNA	non-expressed
ENSG00000100441.8	protein_coding	expressed
ENSG00000233288.1	lincRNA	non-expressed
ENSG00000264406.1	miRNA	non-expressed
ENSG00000243538.1	processed_pseudogene	expressed
ENSG00000251438.1	antisense	non-expressed
ENSG00000215915.8	protein_coding	expressed
ENSG00000200815.1	snRNA	non-expressed
ENSG00000234283.1	lincRNA	expressed
ENSG00000143702.14	protein_coding	expressed
ENSG00000213435.3	processed_pseudogene	expressed
ENSG00000249990.1	processed_pseudogene	non-expressed
ENSG00000240241.4	lincRNA	non-expressed
ENSG00000226827.1	processed_pseudogene	non-expressed
ENSG00000244756.1	processed_pseudogene	non-expressed
ENSG00000198156.9	protein_coding	expressed
ENSG00000258517.1	lincRNA	non-expressed
ENSG00000251031.1	lincRNA	non-expressed
ENSG00000237363.1	unprocessed_pseudogene	non-expressed
ENSG00000226317.2	lincRNA	non-expressed
ENSG00000224906.3	processed_pseudogene	non-expressed
ENSG00000250915.1	lincRNA	non-expressed
ENSG00000204936.8	protein_coding	expressed
ENSG00000122068.11	protein_coding	expressed
ENSG00000234692.1	lincRNA	expressed
ENSG00000275315.1	unprocessed_pseudogene	non-expressed
ENSG00000228851.1	unprocessed_pseudogene	non-expressed
ENSG00000251603.1	antisense	expressed
ENSG00000226668.4	transcribed_unprocessed_pseudogene	non-expressed
ENSG00000238726.1	miRNA	non-expressed
ENSG00000188816.3	protein_coding	expressed
ENSG00000261600.1	lincRNA	expressed
ENSG00000119844.13	protein_coding	expressed
ENSG00000202529.1	snoRNA	non-expressed
ENSG00000214353.6	antisense	expressed
ENSG00000167770.10	protein_coding	expressed
ENSG00000256081.2	processed_pseudogene	non-expressed
ENSG00000268500.4	protein_coding	non-expressed
ENSG00000218305.3	processed_pseudogene	non-expressed
ENSG00000281593.1	protein_coding	expressed
ENSG00000257198.5	transcribed_unprocessed_pseudogene	non-expressed
ENSG00000250252.1	lincRNA	non-expressed
ENSG00000254884.1	processed_pseudogene	non-expressed
ENSG00000274124.1	antisense	non-expressed
ENSG00000275830.1	lincRNA	expressed
ENSG00000135083.13	protein_coding	expressed
ENSG00000254519.2	lincRNA	expressed
ENSG00000101367.8	protein_coding	expressed
ENSG00000273063.1	antisense	non-expressed
ENSG00000249988.1	lincRNA	non-expressed
ENSG00000166405.13	protein_coding	expressed
ENSG00000255987.1	processed_pseudogene	expressed
ENSG00000267048.1	processed_transcript	expressed
ENSG00000213315.5	processed_pseudogene	expressed
ENSG00000227799.1	processed_pseudogene	expressed
ENSG00000239900.10	protein_coding	expressed
ENSG00000271251.1	processed_pseudogene	non-expressed
ENSG00000114993.14	protein_coding	expressed
ENSG00000189332.5	transcribed_unprocessed_pseudogene	non-expressed
ENSG00000117682.15	protein_coding	expressed
ENSG00000174450.10	protein_coding	expressed
ENSG00000110169.9	protein_coding	expressed
ENSG00000010319.5	protein_coding	expressed
ENSG00000204021.3	protein_coding	expressed
ENSG00000189420.8	protein_coding	expressed
ENSG00000232065.1	antisense	expressed
ENSG00000198833.6	protein_coding	expressed
ENSG00000201048.1	misc_RNA	non-expressed
ENSG00000275126.1	protein_coding	non-expressed
ENSG00000258822.1	unprocessed_pseudogene	non-expressed
ENSG00000201807.1	snoRNA	non-expressed
ENSG00000256311.1	antisense	non-expressed
ENSG00000244128.4	lincRNA	expressed
ENSG00000222667.1	snRNA	non-expressed
ENSG00000211779.3	TR_V_gene	expressed
ENSG00000202427.1	snRNA	non-expressed
ENSG00000274501.1	antisense	expressed
ENSG00000259056.1	transcribed_unprocessed_pseudogene	non-expressed
ENSG00000226433.1	antisense	non-expressed
ENSG00000018625.13	protein_coding	expressed
ENSG00000165502.6	protein_coding	expressed
ENSG00000111711.8	protein_coding	expressed
ENSG00000248684.1	processed_pseudogene	non-expressed
ENSG00000172322.12	protein_coding	expressed
ENSG00000281632.1	miRNA	non-expressed
ENSG00000255029.1	lincRNA	non-expressed
ENSG00000240281.2	processed_pseudogene	non-expressed
ENSG00000122545.16	protein_coding	expressed
ENSG00000201742.1	snRNA	non-expressed
ENSG00000137804.11	protein_coding	expressed
ENSG00000202225.1	rRNA	non-expressed
ENSG00000233385.1	unprocessed_pseudogene	non-expressed
ENSG00000087116.12	protein_coding	expressed
ENSG00000221280.2	miRNA	non-expressed
ENSG00000231961.1	processed_pseudogene	non-expressed
ENSG00000226695.1	processed_pseudogene	expressed
ENSG00000115268.8	protein_coding	expressed
ENSG00000179361.16	protein_coding	expressed
ENSG00000146143.16	protein_coding	expressed
ENSG00000089050.13	protein_coding	expressed
ENSG00000259724.1	lincRNA	non-expressed
ENSG00000234380.1	antisense	expressed
ENSG00000103599.18	protein_coding	expressed
ENSG00000279085.1	antisense	non-expressed
ENSG00000107331.15	protein_coding	expressed
ENSG00000252817.2	miRNA	expressed
ENSG00000252891.1	misc_RNA	non-expressed
ENSG00000153317.13	protein_coding	expressed
ENSG00000259375.1	antisense	non-expressed
ENSG00000229030.1	processed_pseudogene	non-expressed
ENSG00000207726.2	miRNA	non-expressed
ENSG00000254428.1	antisense	expressed
ENSG00000184661.12	protein_coding	expressed
ENSG00000236252.2	transcribed_processed_pseudogene	non-expressed
ENSG00000271195.1	processed_pseudogene	non-expressed
ENSG00000237913.1	processed_pseudogene	non-expressed
ENSG00000261122.5	lincRNA	expressed
ENSG00000242405.2	processed_pseudogene	non-expressed
ENSG00000274127.1	misc_RNA	non-expressed
[truncated: 58,484 more rows]

## Sheet: KIRC
gene	gene_type	status
ENSG00000207922.1	miRNA	non-expressed
ENSG00000168872.14	protein_coding	expressed
ENSG00000182272.10	protein_coding	expressed
ENSG00000251686.1	unprocessed_pseudogene	non-expressed
ENSG00000108960.6	protein_coding	expressed
ENSG00000252452.1	snRNA	non-expressed
ENSG00000275075.1	processed_pseudogene	non-expressed
ENSG00000196814.13	protein_coding	expressed
ENSG00000134323.10	protein_coding	expressed
ENSG00000239373.3	misc_RNA	non-expressed
ENSG00000139537.9	protein_coding	expressed
ENSG00000145723.15	protein_coding	expressed
ENSG00000263305.1	lincRNA	non-expressed
ENSG00000204754.3	lincRNA	non-expressed
ENSG00000235011.2	lincRNA	non-expressed
ENSG00000132932.15	protein_coding	expressed
ENSG00000257115.1	protein_coding	non-expressed
ENSG00000272971.1	lincRNA	expressed
ENSG00000196661.3	protein_coding	non-expressed
ENSG00000197465.12	protein_coding	expressed
ENSG00000231812.1	processed_pseudogene	non-expressed
ENSG00000254586.1	lincRNA	non-expressed
ENSG00000145826.7	protein_coding	expressed
ENSG00000265778.2	antisense	expressed
ENSG00000200957.1	snRNA	non-expressed
ENSG00000278203.1	miRNA	non-expressed
ENSG00000117090.13	protein_coding	expressed
ENSG00000061492.10	protein_coding	non-expressed
ENSG00000237798.1	antisense	non-expressed
ENSG00000214248.2	antisense	expressed
ENSG00000213416.3	protein_coding	non-expressed
ENSG00000247151.5	antisense	non-expressed
ENSG00000214184.3	antisense	expressed
ENSG00000250863.1	lincRNA	expressed
ENSG00000197763.11	protein_coding	expressed
ENSG00000139116.16	protein_coding	expressed
ENSG00000243431.1	processed_pseudogene	expressed
ENSG00000265485.4	lincRNA	expressed
ENSG00000270750.1	lincRNA	expressed
ENSG00000116133.10	protein_coding	expressed
ENSG00000229720.1	lincRNA	expressed
ENSG00000277189.1	miRNA	non-expressed
ENSG00000227207.2	processed_pseudogene	non-expressed
ENSG00000134138.18	protein_coding	expressed
ENSG00000173262.10	protein_coding	expressed
ENSG00000212254.1	snRNA	non-expressed
ENSG00000144381.15	protein_coding	expressed
ENSG00000176896.8	protein_coding	expressed
ENSG00000225471.4	transcribed_processed_pseudogene	expressed
ENSG00000250902.1	antisense	non-expressed
ENSG00000129474.14	protein_coding	expressed
ENSG00000171476.20	protein_coding	expressed
ENSG00000280511.1	lincRNA	non-expressed
ENSG00000234551.1	lincRNA	non-expressed
ENSG00000187621.13	processed_transcript	expressed
ENSG00000138152.8	protein_coding	expressed
ENSG00000241280.1	lincRNA	non-expressed
ENSG00000227777.1	processed_pseudogene	non-expressed
ENSG00000177243.3	protein_coding	non-expressed
ENSG00000230838.1	lincRNA	expressed
ENSG00000268051.1	sense_intronic	non-expressed
ENSG00000255121.2	lincRNA	expressed
ENSG00000188467.9	protein_coding	expressed
ENSG00000245729.2	lincRNA	non-expressed
ENSG00000178965.12	protein_coding	expressed
ENSG00000277043.1	processed_pseudogene	non-expressed
ENSG00000238304.1	snRNA	non-expressed
ENSG00000178031.14	protein_coding	expressed
ENSG00000172752.13	protein_coding	expressed
ENSG00000067900.6	protein_coding	expressed
ENSG00000011114.13	protein_coding	expressed
ENSG00000130518.15	protein_coding	expressed
ENSG00000101166.14	protein_coding	expressed
ENSG00000103343.11	protein_coding	expressed
ENSG00000140553.15	protein_coding	expressed
ENSG00000203756.6	protein_coding	non-expressed
ENSG00000266364.1	transcribed_processed_pseudogene	non-expressed
ENSG00000025800.12	protein_coding	expressed
ENSG00000166317.10	protein_coding	expressed
ENSG00000250273.1	processed_pseudogene	non-expressed
ENSG00000243115.3	misc_RNA	non-expressed
ENSG00000184076.12	protein_coding	expressed
ENSG00000134748.12	protein_coding	expressed
ENSG00000227331.1	processed_pseudogene	expressed
ENSG00000261731.2	antisense	non-expressed
ENSG00000240767.3	misc_RNA	non-expressed
ENSG00000176387.6	protein_coding	expressed
ENSG00000241146.1	processed_pseudogene	non-expressed
ENSG00000146278.10	protein_coding	expressed
ENSG00000267679.1	processed_pseudogene	expressed
ENSG00000226200.5	antisense	expressed
ENSG00000162654.8	protein_coding	expressed
ENSG00000270612.1	processed_pseudogene	non-expressed
ENSG00000094804.8	protein_coding	expressed
ENSG00000116209.10	protein_coding	expressed
ENSG00000081853.14	protein_coding	expressed
ENSG00000248514.1	antisense	expressed
ENSG00000237252.1	processed_pseudogene	non-expressed
ENSG00000271100.1	processed_pseudogene	non-expressed
ENSG00000232661.1	antisense	non-expressed
ENSG00000254164.1	lincRNA	expressed
ENSG00000225639.1	processed_pseudogene	non-expressed
ENSG00000224244.1	unprocessed_pseudogene	non-expressed
ENSG00000269954.1	lincRNA	non-expressed
ENSG00000185519.8	protein_coding	expressed
ENSG00000159055.3	protein_coding	expressed
ENSG00000204603.5	lincRNA	non-expressed
ENSG00000201242.1	misc_RNA	non-expressed
ENSG00000242036.1	processed_pseudogene	non-expressed
ENSG00000258747.1	antisense	non-expressed
ENSG00000265744.1	miRNA	non-expressed
ENSG00000230223.5	antisense	non-expressed
ENSG00000119915.4	protein_coding	expressed
ENSG00000281273.1	protein_coding	non-expressed
ENSG00000276037.1	miRNA	non-expressed
ENSG00000103710.9	protein_coding	expressed
ENSG00000254415.3	protein_coding	expressed
ENSG00000255360.1	unprocessed_pseudogene	non-expressed
ENSG00000254710.1	antisense	non-expressed
ENSG00000276786.1	lincRNA	expressed
ENSG00000214003.2	processed_pseudogene	non-expressed
ENSG00000229600.1	lincRNA	non-expressed
ENSG00000234877.2	lincRNA	non-expressed
ENSG00000111674.7	protein_coding	expressed
ENSG00000252575.1	miRNA	non-expressed
ENSG00000278870.1	polymorphic_pseudogene	non-expressed
ENSG00000007168.11	protein_coding	expressed
ENSG00000236615.1	unprocessed_pseudogene	non-expressed
ENSG00000231610.1	processed_pseudogene	non-expressed
ENSG00000233120.1	unprocessed_pseudogene	non-expressed
ENSG00000179673.4	protein_coding	non-expressed
ENSG00000237115.2	processed_pseudogene	expressed
ENSG00000218809.1	unprocessed_pseudogene	non-expressed
ENSG00000221234.1	miRNA	non-expressed
ENSG00000231816.1	lincRNA	expressed
ENSG00000259389.2	processed_pseudogene	non-expressed
ENSG00000248873.1	processed_pseudogene	non-expressed
ENSG00000277767.1	lincRNA	expressed
ENSG00000234763.1	lincRNA	non-expressed
ENSG00000203697.10	protein_coding	expressed
ENSG00000229536.1	lincRNA	expressed
ENSG00000275084.2	snoRNA	non-expressed
ENSG00000278123.1	snoRNA	non-expressed
ENSG00000201176.1	snRNA	non-expressed
ENSG00000267383.5	antisense	expressed
ENSG00000145293.13	protein_coding	expressed
ENSG00000139910.18	protein_coding	expressed
ENSG00000228995.1	processed_pseudogene	non-expressed
ENSG00000168389.16	protein_coding	expressed
ENSG00000238561.1	snRNA	non-expressed
ENSG00000206779.1	misc_RNA	non-expressed
ENSG00000105223.17	protein_coding	expressed
ENSG00000164062.11	protein_coding	expressed
ENSG00000272288.4	antisense	expressed
ENSG00000264801.1	transcribed_processed_pseudogene	expressed
ENSG00000237449.1	unitary_pseudogene	non-expressed
ENSG00000253164.4	lincRNA	non-expressed
ENSG00000252316.1	misc_RNA	non-expressed
ENSG00000259856.1	processed_pseudogene	expressed
ENSG00000251546.1	IG_V_gene	expressed
ENSG00000259151.2	transcribed_processed_pseudogene	non-expressed
ENSG00000239763.2	processed_pseudogene	expressed
ENSG00000198626.14	protein_coding	expressed
ENSG00000256480.1	processed_pseudogene	non-expressed
ENSG00000272902.2	lincRNA	expressed
ENSG00000099953.8	protein_coding	expressed
ENSG00000225407.3	antisense	expressed
ENSG00000173275.11	protein_coding	expressed
ENSG00000271933.1	antisense	expressed
ENSG00000249811.2	protein_coding	non-expressed
ENSG00000249404.1	lincRNA	non-expressed
ENSG00000227995.1	processed_pseudogene	non-expressed
ENSG00000222842.1	misc_RNA	non-expressed
ENSG00000275220.1	miRNA	non-expressed
ENSG00000251323.2	lincRNA	expressed
ENSG00000264345.1	lincRNA	non-expressed
ENSG00000223652.2	antisense	expressed
ENSG00000230650.1	processed_pseudogene	expressed
ENSG00000277987.1	lincRNA	expressed
ENSG00000134900.10	protein_coding	expressed
ENSG00000207548.2	miRNA	non-expressed
ENSG00000224943.1	lincRNA	non-expressed
ENSG00000278907.1	antisense	non-expressed
ENSG00000262151.1	antisense	non-expressed
ENSG00000259347.4	lincRNA	expressed
ENSG00000160396.8	protein_coding	expressed
ENSG00000177888.7	protein_coding	expressed
ENSG00000177990.10	protein_coding	expressed
ENSG00000235750.8	protein_coding	expressed
ENSG00000276150.1	misc_RNA	non-expressed
ENSG00000238448.1	miRNA	non-expressed
ENSG00000159445.11	protein_coding	expressed
ENSG00000267150.1	antisense	expressed
ENSG00000232109.1	processed_pseudogene	non-expressed
ENSG00000137675.4	protein_coding	non-expressed
ENSG00000229531.4	antisense	non-expressed
ENSG00000178458.5	processed_pseudogene	expressed
ENSG00000207559.1	miRNA	non-expressed
ENSG00000006432.14	protein_coding	expressed
ENSG00000260307.2	processed_pseudogene	non-expressed
ENSG00000259115.1	lincRNA	non-expressed
ENSG00000235831.5	antisense	expressed
ENSG00000226804.4	processed_pseudogene	non-expressed
ENSG00000155561.13	protein_coding	expressed
ENSG00000223966.1	antisense	non-expressed
ENSG00000236246.1	processed_pseudogene	non-expressed
ENSG00000106927.10	protein_coding	expressed
ENSG00000224732.1	unprocessed_pseudogene	non-expressed
ENSG00000197959.12	protein_coding	expressed
ENSG00000188313.11	protein_coding	expressed
ENSG00000231990.1	lincRNA	non-expressed
ENSG00000253869.1	processed_pseudogene	expressed
ENSG00000279227.1	TEC	expressed
ENSG00000270493.1	processed_pseudogene	non-expressed
ENSG00000120280.5	protein_coding	expressed
ENSG00000280039.1	TEC	expressed
ENSG00000128641.16	protein_coding	expressed
ENSG00000211944.2	IG_V_gene	non-expressed
ENSG00000255148.2	antisense	non-expressed
ENSG00000153060.6	protein_coding	expressed
ENSG00000270623.1	processed_pseudogene	non-expressed
ENSG00000275467.1	lincRNA	non-expressed
ENSG00000153898.11	protein_coding	expressed
ENSG00000003249.12	protein_coding	expressed
ENSG00000149506.9	protein_coding	expressed
ENSG00000106809.9	protein_coding	expressed
ENSG00000153310.17	protein_coding	expressed
ENSG00000259252.1	lincRNA	non-expressed
ENSG00000259518.1	lincRNA	expressed
ENSG00000218730.1	processed_pseudogene	non-expressed
ENSG00000126583.9	protein_coding	expressed
ENSG00000278128.1	processed_pseudogene	non-expressed
ENSG00000223387.5	lincRNA	expressed
ENSG00000200262.1	misc_RNA	non-expressed
ENSG00000199071.2	miRNA	non-expressed
ENSG00000105255.9	protein_coding	expressed
ENSG00000256609.1	antisense	expressed
ENSG00000258509.1	processed_pseudogene	non-expressed
ENSG00000270558.1	processed_pseudogene	expressed
ENSG00000197024.7	protein_coding	expressed
ENSG00000257355.1	protein_coding	non-expressed
ENSG00000237460.2	lincRNA	non-expressed
ENSG00000175197.9	protein_coding	expressed
ENSG00000075651.14	protein_coding	expressed
ENSG00000165092.11	protein_coding	expressed
ENSG00000266151.1	miRNA	expressed
ENSG00000252959.1	rRNA	non-expressed
ENSG00000233960.1	lincRNA	non-expressed
ENSG00000109625.17	protein_coding	expressed
ENSG00000268030.1	antisense	expressed
ENSG00000221628.1	miRNA	non-expressed
ENSG00000270605.1	antisense	expressed
ENSG00000244361.1	processed_pseudogene	expressed
ENSG00000224256.1	processed_pseudogene	non-expressed
ENSG00000266189.1	miRNA	expressed
ENSG00000170745.10	protein_coding	expressed
ENSG00000127995.15	protein_coding	expressed
ENSG00000279153.1	TEC	non-expressed
ENSG00000276692.1	processed_pseudogene	non-expressed
ENSG00000225640.1	lincRNA	non-expressed
ENSG00000227958.1	lincRNA	non-expressed
ENSG00000234354.3	processed_pseudogene	expressed
ENSG00000125868.14	protein_coding	expressed
ENSG00000237807.3	lincRNA	expressed
ENSG00000168137.14	protein_coding	expressed
ENSG00000182472.7	protein_coding	expressed
ENSG00000252983.1	snRNA	non-expressed
ENSG00000275716.1	processed_pseudogene	non-expressed
ENSG00000273497.1	unprocessed_pseudogene	non-expressed
ENSG00000251113.2	processed_pseudogene	non-expressed
ENSG00000213149.3	processed_pseudogene	expressed
ENSG00000173124.13	protein_coding	expressed
ENSG00000141985.8	protein_coding	expressed
ENSG00000168748.12	protein_coding	non-expressed
ENSG00000004776.10	protein_coding	expressed
ENSG00000228577.1	antisense	non-expressed
ENSG00000272113.2	misc_RNA	non-expressed
ENSG00000134443.8	protein_coding	expressed
ENSG00000201470.1	misc_RNA	non-expressed
ENSG00000252745.1	rRNA	non-expressed
ENSG00000185792.8	protein_coding	expressed
ENSG00000106327.11	protein_coding	expressed
ENSG00000112837.15	protein_coding	expressed
ENSG00000254860.4	antisense	expressed
ENSG00000267308.1	lincRNA	non-expressed
ENSG00000180747.14	transcribed_unprocessed_pseudogene	expressed
ENSG00000187122.15	protein_coding	expressed
ENSG00000142089.14	protein_coding	expressed
ENSG00000278348.1	misc_RNA	non-expressed
ENSG00000221016.1	miRNA	non-expressed
ENSG00000187792.4	protein_coding	expressed
ENSG00000124678.16	protein_coding	expressed
ENSG00000186369.8	lincRNA	expressed
ENSG00000239525.1	processed_pseudogene	non-expressed
ENSG00000140525.16	protein_coding	expressed
ENSG00000255545.6	processed_transcript	expressed
ENSG00000240533.3	misc_RNA	non-expressed
ENSG00000254279.1	IG_V_pseudogene	non-expressed
ENSG00000250260.1	lincRNA	non-expressed
ENSG00000164972.11	protein_coding	expressed
ENSG00000244260.1	lincRNA	non-expressed
ENSG00000156261.11	protein_coding	expressed
ENSG00000236844.1	processed_pseudogene	non-expressed
ENSG00000046653.13	protein_coding	expressed
ENSG00000277861.1	miRNA	non-expressed
ENSG00000145882.9	protein_coding	expressed
ENSG00000229654.1	lincRNA	expressed
ENSG00000241188.3	misc_RNA	non-expressed
ENSG00000275229.1	snRNA	non-expressed
ENSG00000200220.1	snRNA	non-expressed
ENSG00000265691.1	miRNA	non-expressed
ENSG00000239465.1	processed_pseudogene	non-expressed
ENSG00000175143.3	protein_coding	non-expressed
ENSG00000187533.12	protein_coding	non-expressed
ENSG00000277682.1	miRNA	non-expressed
ENSG00000183909.5	unprocessed_pseudogene	non-expressed
ENSG00000265820.1	miRNA	non-expressed
ENSG00000239988.1	processed_pseudogene	non-expressed
ENSG00000232778.1	processed_pseudogene	non-expressed
ENSG00000267452.1	lincRNA	expressed
ENSG00000279925.1	TEC	non-expressed
ENSG00000227140.3	protein_coding	non-expressed
ENSG00000280945.1	miRNA	non-expressed
ENSG00000276764.1	misc_RNA	non-expressed
ENSG00000276678.1	misc_RNA	non-expressed
ENSG00000238644.1	miRNA	non-expressed
ENSG00000221803.1	snoRNA	non-expressed
ENSG00000251400.1	processed_pseudogene	expressed
ENSG00000259374.2	transcribed_processed_pseudogene	expressed
ENSG00000176246.1	protein_coding	non-expressed
ENSG00000131943.16	protein_coding	expressed
ENSG00000198491.3	antisense	non-expressed
ENSG00000104472.8	protein_coding	expressed
ENSG00000239917.3	unprocessed_pseudogene	expressed
ENSG00000253571.1	processed_pseudogene	non-expressed
ENSG00000224918.1	lincRNA	non-expressed
ENSG00000212073.1	miRNA	non-expressed
ENSG00000212348.1	snRNA	non-expressed
ENSG00000259498.1	antisense	expressed
ENSG00000159259.7	protein_coding	expressed
ENSG00000262877.4	lincRNA	expressed
ENSG00000138600.8	protein_coding	expressed
ENSG00000215326.3	processed_pseudogene	expressed
ENSG00000214853.4	processed_pseudogene	non-expressed
ENSG00000276729.1	misc_RNA	non-expressed
ENSG00000146383.7	protein_coding	non-expressed
ENSG00000250976.1	antisense	non-expressed
ENSG00000201407.1	snoRNA	non-expressed
ENSG00000229862.4	antisense	expressed
ENSG00000257219.4	lincRNA	expressed
ENSG00000184571.12	protein_coding	non-expressed
ENSG00000237260.1	processed_pseudogene	non-expressed
ENSG00000237804.1	processed_pseudogene	expressed
ENSG00000264897.1	miRNA	non-expressed
ENSG00000231913.1	processed_pseudogene	non-expressed
ENSG00000279018.1	protein_coding	non-expressed
ENSG00000225637.1	lincRNA	expressed
ENSG00000280636.1	snoRNA	non-expressed
ENSG00000279645.1	TEC	expressed
ENSG00000244998.1	antisense	expressed
ENSG00000223728.3	processed_pseudogene	expressed
ENSG00000258623.1	antisense	expressed
ENSG00000225520.1	lincRNA	non-expressed
ENSG00000188755.8	transcribed_unprocessed_pseudogene	non-expressed
ENSG00000232998.1	antisense	non-expressed
ENSG00000163872.14	protein_coding	expressed
ENSG00000165671.17	protein_coding	expressed
ENSG00000135387.18	protein_coding	expressed
ENSG00000272742.1	antisense	non-expressed
ENSG00000225536.2	processed_pseudogene	non-expressed
ENSG00000229832.1	sense_intronic	expressed
ENSG00000150750.6	protein_coding	non-expressed
ENSG00000105254.10	protein_coding	expressed
ENSG00000256861.1	protein_coding	non-expressed
ENSG00000235903.6	antisense	expressed
ENSG00000230746.1	lincRNA	non-expressed
ENSG00000231104.7	antisense	expressed
ENSG00000165309.12	protein_coding	expressed
ENSG00000233750.3	processed_pseudogene	non-expressed
ENSG00000239057.1	miRNA	non-expressed
ENSG00000235875.3	antisense	expressed
ENSG00000138642.13	protein_coding	expressed
ENSG00000233017.2	antisense	non-expressed
ENSG00000264519.2	misc_RNA	non-expressed
ENSG00000168209.4	protein_coding	expressed
ENSG00000149923.12	protein_coding	expressed
ENSG00000237458.1	processed_pseudogene	non-expressed
ENSG00000088305.17	protein_coding	expressed
ENSG00000214832.5	transcribed_processed_pseudogene	expressed
ENSG00000211681.2	IG_J_gene	non-expressed
ENSG00000260113.3	processed_pseudogene	non-expressed
ENSG00000255136.2	lincRNA	expressed
ENSG00000133639.4	protein_coding	expressed
ENSG00000243147.6	protein_coding	expressed
ENSG00000199237.1	snRNA	non-expressed
ENSG00000207127.1	misc_RNA	non-expressed
ENSG00000108591.8	protein_coding	expressed
ENSG00000211538.1	miRNA	non-expressed
ENSG00000265639.1	processed_pseudogene	non-expressed
ENSG00000250300.1	unprocessed_pseudogene	non-expressed
ENSG00000280401.1	TEC	expressed
ENSG00000274390.1	miRNA	non-expressed
ENSG00000258963.1	unprocessed_pseudogene	non-expressed
ENSG00000199634.1	snRNA	non-expressed
ENSG00000222997.1	misc_RNA	non-expressed
ENSG00000254290.1	lincRNA	expressed
ENSG00000279058.1	protein_coding	expressed
ENSG00000249284.1	processed_pseudogene	non-expressed
ENSG00000273694.1	snRNA	non-expressed
ENSG00000271397.1	processed_pseudogene	non-expressed
ENSG00000142945.11	protein_coding	expressed
ENSG00000242278.1	processed_pseudogene	non-expressed
ENSG00000199218.1	misc_RNA	non-expressed
ENSG00000201523.1	rRNA	non-expressed
ENSG00000156414.17	protein_coding	expressed
ENSG00000134086.7	protein_coding	expressed
ENSG00000132640.13	protein_coding	expressed
ENSG00000167634.11	protein_coding	expressed
ENSG00000204991.9	protein_coding	expressed
ENSG00000240791.1	unprocessed_pseudogene	non-expressed
ENSG00000220113.2	processed_pseudogene	non-expressed
ENSG00000253203.5	transcribed_unprocessed_pseudogene	expressed
ENSG00000225302.2	antisense	expressed
ENSG00000111843.12	protein_coding	expressed
ENSG00000258591.2	processed_pseudogene	expressed
ENSG00000268812.3	antisense	expressed
ENSG00000274092.1	antisense	expressed
ENSG00000149243.14	protein_coding	expressed
ENSG00000250173.1	lincRNA	non-expressed
ENSG00000241956.8	antisense	expressed
ENSG00000250622.1	processed_pseudogene	non-expressed
ENSG00000248521.1	processed_pseudogene	non-expressed
ENSG00000201348.1	snoRNA	non-expressed
ENSG00000204175.5	protein_coding	expressed
ENSG00000225352.1	processed_pseudogene	non-expressed
ENSG00000101966.11	protein_coding	expressed
ENSG00000253054.1	snRNA	non-expressed
ENSG00000215483.7	lincRNA	expressed
ENSG00000207387.1	misc_RNA	non-expressed
ENSG00000213924.3	processed_pseudogene	non-expressed
ENSG00000162616.8	protein_coding	expressed
ENSG00000183474.14	protein_coding	expressed
ENSG00000228265.4	lincRNA	expressed
ENSG00000258926.1	antisense	expressed
ENSG00000136697.11	protein_coding	non-expressed
ENSG00000214282.3	processed_pseudogene	non-expressed
ENSG00000219361.1	processed_pseudogene	non-expressed
ENSG00000204837.3	unprocessed_pseudogene	expressed
ENSG00000132622.9	protein_coding	expressed
ENSG00000243220.1	antisense	expressed
ENSG00000236885.1	lincRNA	non-expressed
ENSG00000114737.14	protein_coding	expressed
ENSG00000135749.17	protein_coding	expressed
ENSG00000261468.1	sense_overlapping	expressed
ENSG00000130427.2	protein_coding	expressed
ENSG00000231628.1	antisense	expressed
ENSG00000189319.12	protein_coding	expressed
ENSG00000251257.2	antisense	expressed
ENSG00000155229.19	protein_coding	expressed
ENSG00000165409.14	protein_coding	expressed
ENSG00000188869.11	protein_coding	expressed
ENSG00000201179.1	snRNA	non-expressed
ENSG00000235203.2	unprocessed_pseudogene	non-expressed
ENSG00000279319.1	TEC	expressed
ENSG00000131378.12	protein_coding	expressed
ENSG00000231963.1	antisense	non-expressed
ENSG00000227186.1	antisense	non-expressed
ENSG00000254070.1	processed_pseudogene	non-expressed
ENSG00000158485.9	protein_coding	expressed
ENSG00000229192.5	lincRNA	non-expressed
ENSG00000274420.1	misc_RNA	non-expressed
ENSG00000224411.3	processed_pseudogene	expressed
ENSG00000266304.1	lincRNA	non-expressed
ENSG00000225397.1	processed_pseudogene	non-expressed
ENSG00000226360.5	processed_pseudogene	expressed
ENSG00000267301.1	processed_pseudogene	expressed
ENSG00000226609.1	antisense	expressed
ENSG00000217539.2	processed_pseudogene	non-expressed
ENSG00000233996.1	processed_pseudogene	non-expressed
ENSG00000269191.1	antisense	expressed
ENSG00000144935.13	protein_coding	expressed
ENSG00000184659.5	protein_coding	non-expressed
ENSG00000251401.2	processed_pseudogene	non-expressed
ENSG00000225807.1	lincRNA	non-expressed
ENSG00000227513.1	processed_pseudogene	non-expressed
ENSG00000213750.4	processed_pseudogene	non-expressed
ENSG00000239659.2	processed_pseudogene	non-expressed
ENSG00000241693.2	misc_RNA	non-expressed
ENSG00000278703.1	lincRNA	expressed
ENSG00000109133.11	protein_coding	expressed
ENSG00000138028.13	protein_coding	expressed
ENSG00000075420.11	protein_coding	expressed
ENSG00000169509.5	protein_coding	non-expressed
ENSG00000221725.1	snRNA	non-expressed
ENSG00000249045.1	unprocessed_pseudogene	non-expressed
ENSG00000271173.1	processed_pseudogene	non-expressed
ENSG00000257150.2	transcribed_processed_pseudogene	expressed
ENSG00000125089.15	protein_coding	expressed
ENSG00000242607.1	processed_pseudogene	expressed
ENSG00000256343.6	lincRNA	non-expressed
ENSG00000275510.1	miRNA	non-expressed
ENSG00000271468.1	processed_pseudogene	non-expressed
ENSG00000266922.1	sense_intronic	expressed
ENSG00000254076.1	processed_pseudogene	non-expressed
ENSG00000252218.1	scaRNA	non-expressed
ENSG00000171612.6	protein_coding	expressed
ENSG00000231341.1	processed_pseudogene	non-expressed
ENSG00000228569.1	lincRNA	expressed
ENSG00000198106.8	lincRNA	expressed
ENSG00000240800.1	transcribed_unprocessed_pseudogene	non-expressed
ENSG00000166845.12	protein_coding	expressed
ENSG00000200530.1	snoRNA	non-expressed
ENSG00000123999.4	protein_coding	expressed
ENSG00000277468.1	misc_RNA	non-expressed
ENSG00000176922.3	protein_coding	non-expressed
ENSG00000221910.2	protein_coding	non-expressed
ENSG00000260866.1	unprocessed_pseudogene	non-expressed
ENSG00000215895.4	processed_pseudogene	expressed
ENSG00000221354.1	miRNA	non-expressed
ENSG00000100288.18	protein_coding	expressed
ENSG00000251286.2	processed_pseudogene	non-expressed
ENSG00000145908.11	protein_coding	expressed
ENSG00000234848.1	antisense	expressed
ENSG00000275992.1	misc_RNA	non-expressed
ENSG00000146122.15	protein_coding	expressed
ENSG00000163297.15	protein_coding	expressed
ENSG00000254531.1	lincRNA	expressed
ENSG00000253671.1	processed_transcript	expressed
ENSG00000269392.1	antisense	expressed
ENSG00000256197.1	sense_intronic	non-expressed
ENSG00000214835.3	processed_pseudogene	non-expressed
ENSG00000260086.2	lincRNA	expressed
ENSG00000279685.2	sense_intronic	expressed
ENSG00000244278.1	lincRNA	non-expressed
ENSG00000279656.1	TEC	expressed
ENSG00000198983.1	miRNA	non-expressed
ENSG00000171481.3	protein_coding	non-expressed
ENSG00000115523.15	protein_coding	expressed
ENSG00000279786.1	TEC	expressed
ENSG00000132204.12	lincRNA	expressed
ENSG00000257259.1	lincRNA	non-expressed
ENSG00000235040.1	unprocessed_pseudogene	non-expressed
ENSG00000240591.1	antisense	expressed
ENSG00000112576.11	protein_coding	expressed
ENSG00000082068.7	protein_coding	expressed
ENSG00000240993.3	misc_RNA	non-expressed
ENSG00000274685.1	lincRNA	non-expressed
ENSG00000206077.9	protein_coding	expressed
ENSG00000226533.1	antisense	non-expressed
ENSG00000104765.13	protein_coding	expressed
ENSG00000259950.1	processed_pseudogene	non-expressed
ENSG00000230304.1	processed_pseudogene	non-expressed
ENSG00000266276.2	miRNA	non-expressed
ENSG00000171671.6	antisense	non-expressed
ENSG00000259604.4	lincRNA	non-expressed
ENSG00000265043.1	lincRNA	non-expressed
ENSG00000226964.1	processed_pseudogene	expressed
ENSG00000063015.18	protein_coding	expressed
ENSG00000140612.12	protein_coding	expressed
ENSG00000227800.1	IG_D_gene	non-expressed
ENSG00000163482.10	protein_coding	expressed
ENSG00000171401.13	protein_coding	expressed
ENSG00000242668.3	misc_RNA	non-expressed
ENSG00000224914.2	lincRNA	expressed
ENSG00000273117.1	lincRNA	expressed
ENSG00000099715.13	protein_coding	expressed
ENSG00000224530.1	processed_pseudogene	non-expressed
ENSG00000263776.1	snoRNA	non-expressed
ENSG00000279174.1	TEC	expressed
ENSG00000277490.1	processed_pseudogene	non-expressed
ENSG00000125845.6	protein_coding	expressed
ENSG00000272909.1	antisense	expressed
ENSG00000236648.1	lincRNA	non-expressed
ENSG00000280953.1	lincRNA	expressed
ENSG00000271187.1	processed_pseudogene	non-expressed
ENSG00000252091.1	snRNA	non-expressed
ENSG00000278946.1	antisense	non-expressed
ENSG00000200817.1	snRNA	non-expressed
ENSG00000212378.1	snoRNA	non-expressed
ENSG00000230542.4	lincRNA	expressed
ENSG00000272953.1	lincRNA	expressed
ENSG00000233887.1	processed_pseudogene	non-expressed
ENSG00000202398.1	snRNA	non-expressed
ENSG00000206638.1	snRNA	non-expressed
ENSG00000227775.3	transcribed_processed_pseudogene	expressed
ENSG00000087274.15	protein_coding	expressed
ENSG00000162704.14	protein_coding	expressed
ENSG00000249501.1	unprocessed_pseudogene	non-expressed
ENSG00000228392.1	lincRNA	non-expressed
ENSG00000205944.10	protein_coding	non-expressed
ENSG00000183318.10	protein_coding	non-expressed
ENSG00000051180.15	protein_coding	expressed
ENSG00000201218.1	misc_RNA	non-expressed
ENSG00000269243.1	antisense	expressed
ENSG00000258780.1	unprocessed_pseudogene	non-expressed
ENSG00000225559.1	lincRNA	non-expressed
ENSG00000216206.1	miRNA	non-expressed
ENSG00000128564.6	protein_coding	expressed
ENSG00000223907.1	lincRNA	expressed
ENSG00000276513.1	miRNA	non-expressed
ENSG00000236511.1	lincRNA	non-expressed
ENSG00000237129.1	processed_pseudogene	non-expressed
ENSG00000239809.1	processed_pseudogene	non-expressed
ENSG00000270075.1	antisense	non-expressed
ENSG00000274584.1	unprocessed_pseudogene	expressed
ENSG00000136158.9	protein_coding	expressed
ENSG00000199065.2	miRNA	non-expressed
ENSG00000223244.1	miRNA	non-expressed
ENSG00000142867.11	protein_coding	expressed
ENSG00000261813.2	processed_pseudogene	non-expressed
ENSG00000116830.10	protein_coding	expressed
ENSG00000253561.1	lincRNA	non-expressed
ENSG00000267000.1	antisense	non-expressed
ENSG00000278586.1	processed_pseudogene	non-expressed
ENSG00000230231.1	unprocessed_pseudogene	non-expressed
ENSG00000272182.1	antisense	expressed
ENSG00000176142.11	protein_coding	expressed
ENSG00000243633.3	misc_RNA	non-expressed
ENSG00000255120.4	antisense	expressed
ENSG00000186417.12	protein_coding	expressed
ENSG00000255124.1	lincRNA	non-expressed
ENSG00000229067.1	processed_pseudogene	non-expressed
ENSG00000248564.1	processed_pseudogene	non-expressed
ENSG00000165555.8	protein_coding	expressed
ENSG00000259579.1	lincRNA	expressed
ENSG00000261542.1	lincRNA	expressed
ENSG00000227602.1	sense_intronic	non-expressed
ENSG00000225331.1	lincRNA	expressed
ENSG00000233884.1	antisense	expressed
ENSG00000240423.1	lincRNA	non-expressed
ENSG00000222205.1	rRNA	non-expressed
ENSG00000233220.3	lincRNA	expressed
ENSG00000143125.5	protein_coding	non-expressed
ENSG00000260276.2	antisense	expressed
ENSG00000220553.1	processed_pseudogene	non-expressed
ENSG00000257766.1	antisense	non-expressed
ENSG00000221385.1	miRNA	non-expressed
ENSG00000248333.6	protein_coding	expressed
ENSG00000112559.12	protein_coding	expressed
ENSG00000235526.1	antisense	non-expressed
ENSG00000250071.1	processed_pseudogene	non-expressed
ENSG00000277854.1	miRNA	non-expressed
ENSG00000207138.1	snRNA	non-expressed
ENSG00000143493.11	protein_coding	expressed
ENSG00000129910.6	protein_coding	expressed
ENSG00000182873.5	antisense	expressed
ENSG00000145604.14	protein_coding	expressed
ENSG00000182901.14	protein_coding	expressed
ENSG00000253267.4	antisense	non-expressed
ENSG00000207518.1	snRNA	non-expressed
ENSG00000186788.11	transcribed_unprocessed_pseudogene	non-expressed
ENSG00000230661.1	processed_pseudogene	non-expressed
ENSG00000225972.1	unprocessed_pseudogene	expressed
ENSG00000266127.1	processed_pseudogene	non-expressed
ENSG00000235369.1	processed_pseudogene	expressed
ENSG00000264765.1	lincRNA	non-expressed
ENSG00000266538.1	lincRNA	expressed
ENSG00000253497.1	IG_V_pseudogene	non-expressed
ENSG00000226014.1	processed_pseudogene	non-expressed
ENSG00000259318.1	processed_pseudogene	expressed
ENSG00000255116.2	processed_pseudogene	non-expressed
ENSG00000275121.1	processed_pseudogene	non-expressed
ENSG00000223442.1	antisense	expressed
ENSG00000243195.1	processed_pseudogene	non-expressed
ENSG00000185842.13	protein_coding	expressed
ENSG00000265428.1	processed_pseudogene	non-expressed
ENSG00000174442.10	protein_coding	expressed
ENSG00000203812.2	protein_coding	non-expressed
ENSG00000266978.1	antisense	non-expressed
ENSG00000229208.1	unprocessed_pseudogene	non-expressed
ENSG00000257588.1	antisense	expressed
ENSG00000260601.1	sense_intronic	expressed
ENSG00000280298.1	protein_coding	non-expressed
ENSG00000221602.1	miRNA	non-expressed
ENSG00000268447.4	protein_coding	non-expressed
ENSG00000162783.10	protein_coding	expressed
ENSG00000126106.12	protein_coding	expressed
ENSG00000254901.6	protein_coding	expressed
ENSG00000268388.4	lincRNA	expressed
ENSG00000274210.1	snRNA	non-expressed
ENSG00000279390.1	TEC	expressed
ENSG00000177551.5	protein_coding	non-expressed
ENSG00000184863.9	protein_coding	expressed
ENSG00000138069.15	protein_coding	expressed
ENSG00000254361.1	lincRNA	non-expressed
ENSG00000280927.1	antisense	expressed
ENSG00000058272.14	protein_coding	expressed
ENSG00000160460.14	protein_coding	expressed
ENSG00000253559.1	antisense	expressed
ENSG00000141753.6	protein_coding	expressed
ENSG00000278107.1	lincRNA	expressed
ENSG00000127528.5	protein_coding	expressed
ENSG00000236108.1	processed_pseudogene	non-expressed
ENSG00000277144.1	lincRNA	expressed
ENSG00000255583.2	transcribed_unprocessed_pseudogene	non-expressed
ENSG00000253696.2	lincRNA	expressed
ENSG00000200673.1	misc_RNA	non-expressed
ENSG00000174021.9	protein_coding	expressed
ENSG00000234579.1	antisense	non-expressed
ENSG00000275690.1	miRNA	non-expressed
ENSG00000236358.1	antisense	expressed
ENSG00000280607.1	processed_transcript	non-expressed
ENSG00000248984.1	antisense	non-expressed
ENSG00000242329.1	processed_pseudogene	non-expressed
ENSG00000181404.15	protein_coding	expressed
ENSG00000119812.17	protein_coding	expressed
ENSG00000249807.1	lincRNA	non-expressed
ENSG00000260799.1	processed_pseudogene	non-expressed
ENSG00000100258.16	protein_coding	expressed
ENSG00000185668.6	protein_coding	expressed
ENSG00000257139.1	lincRNA	non-expressed
ENSG00000075073.13	protein_coding	expressed
ENSG00000260146.1	processed_pseudogene	non-expressed
ENSG00000198393.6	protein_coding	expressed
ENSG00000231346.4	lincRNA	expressed
ENSG00000215023.2	antisense	non-expressed
ENSG00000232864.1	processed_pseudogene	non-expressed
ENSG00000281190.1	miRNA	non-expressed
ENSG00000125967.15	protein_coding	expressed
ENSG00000277497.1	miRNA	non-expressed
ENSG00000267295.1	unprocessed_pseudogene	non-expressed
ENSG00000232187.1	processed_pseudogene	expressed
ENSG00000278908.1	TEC	expressed
ENSG00000280132.1	TEC	expressed
ENSG00000258104.1	processed_pseudogene	non-expressed
ENSG00000206739.1	misc_RNA	expressed
ENSG00000229999.5	antisense	non-expressed
ENSG00000171574.16	protein_coding	expressed
ENSG00000278008.1	processed_pseudogene	non-expressed
ENSG00000176281.4	protein_coding	non-expressed
ENSG00000225401.2	transcribed_processed_pseudogene	non-expressed
ENSG00000188859.6	protein_coding	expressed
ENSG00000109255.10	protein_coding	expressed
ENSG00000104946.9	protein_coding	expressed
ENSG00000277302.1	miRNA	non-expressed
ENSG00000233581.1	antisense	non-expressed
ENSG00000143603.17	protein_coding	expressed
ENSG00000163421.7	protein_coding	expressed
ENSG00000232979.1	processed_pseudogene	non-expressed
ENSG00000254792.1	processed_pseudogene	non-expressed
ENSG00000184209.14	protein_coding	expressed
ENSG00000136541.13	protein_coding	expressed
ENSG00000184281.13	protein_coding	expressed
ENSG00000199172.2	miRNA	expressed
ENSG00000281641.1	lincRNA	expressed
ENSG00000274023.1	sense_overlapping	non-expressed
ENSG00000249655.1	antisense	expressed
ENSG00000280318.1	TEC	non-expressed
ENSG00000253692.3	IG_C_pseudogene	non-expressed
ENSG00000142677.3	protein_coding	expressed
ENSG00000275174.1	snRNA	non-expressed
ENSG00000251725.1	miRNA	non-expressed
ENSG00000146223.13	protein_coding	expressed
ENSG00000248971.2	processed_pseudogene	expressed
ENSG00000260042.1	lincRNA	expressed
ENSG00000249927.1	processed_pseudogene	non-expressed
ENSG00000251275.1	unprocessed_pseudogene	non-expressed
ENSG00000244024.1	processed_pseudogene	non-expressed
ENSG00000236595.1	processed_pseudogene	non-expressed
ENSG00000279616.1	TEC	non-expressed
ENSG00000239718.1	antisense	non-expressed
ENSG00000251741.1	snRNA	non-expressed
ENSG00000100276.9	protein_coding	expressed
ENSG00000124782.18	protein_coding	expressed
ENSG00000151962.6	protein_coding	expressed
ENSG00000197866.3	unprocessed_pseudogene	non-expressed
ENSG00000168802.11	protein_coding	expressed
ENSG00000237235.2	TR_D_gene	non-expressed
ENSG00000007384.14	protein_coding	expressed
ENSG00000230123.1	unprocessed_pseudogene	non-expressed
ENSG00000232912.4	antisense	expressed
ENSG00000243772.5	protein_coding	expressed
ENSG00000115239.20	protein_coding	expressed
ENSG00000227212.3	processed_pseudogene	expressed
ENSG00000180626.9	protein_coding	expressed
ENSG00000248493.1	processed_pseudogene	non-expressed
ENSG00000240478.1	lincRNA	non-expressed
ENSG00000251078.1	processed_pseudogene	non-expressed
ENSG00000257890.1	lincRNA	non-expressed
ENSG00000258924.4	processed_transcript	non-expressed
ENSG00000207874.1	miRNA	non-expressed
ENSG00000151882.10	protein_coding	expressed
ENSG00000278479.1	miRNA	non-expressed
ENSG00000207180.1	snRNA	non-expressed
ENSG00000172179.10	protein_coding	non-expressed
ENSG00000256774.1	processed_pseudogene	non-expressed
ENSG00000143196.4	protein_coding	expressed
ENSG00000250043.1	lincRNA	non-expressed
ENSG00000207816.1	miRNA	non-expressed
ENSG00000267436.1	antisense	non-expressed
ENSG00000250166.2	lincRNA	non-expressed
ENSG00000267203.1	processed_pseudogene	expressed
ENSG00000281600.1	miRNA	non-expressed
ENSG00000267122.1	antisense	non-expressed
ENSG00000275994.1	snoRNA	non-expressed
ENSG00000198729.4	protein_coding	expressed
ENSG00000248690.5	antisense	expressed
ENSG00000279182.1	antisense	expressed
ENSG00000163273.3	protein_coding	expressed
ENSG00000200213.1	snRNA	non-expressed
ENSG00000232350.1	unprocessed_pseudogene	non-expressed
ENSG00000221469.1	miRNA	non-expressed
ENSG00000213822.6	protein_coding	non-expressed
ENSG00000279107.1	TEC	non-expressed
ENSG00000273180.1	lincRNA	expressed
ENSG00000272023.1	lincRNA	non-expressed
ENSG00000253685.1	unprocessed_pseudogene	non-expressed
ENSG00000199260.1	snRNA	non-expressed
ENSG00000180720.7	protein_coding	expressed
ENSG00000248191.1	processed_pseudogene	non-expressed
ENSG00000240373.1	antisense	expressed
ENSG00000180525.11	protein_coding	expressed
ENSG00000217159.2	processed_pseudogene	non-expressed
ENSG00000223275.1	miRNA	non-expressed
ENSG00000221633.2	snoRNA	non-expressed
ENSG00000281389.1	miRNA	non-expressed
ENSG00000249539.1	processed_pseudogene	non-expressed
ENSG00000131100.11	protein_coding	expressed
ENSG00000255171.4	lincRNA	non-expressed
ENSG00000066557.5	protein_coding	expressed
ENSG00000157064.9	protein_coding	expressed
ENSG00000225328.1	antisense	expressed
ENSG00000279377.1	TEC	expressed
ENSG00000258369.1	processed_pseudogene	non-expressed
ENSG00000147687.15	protein_coding	expressed
ENSG00000242924.1	lincRNA	non-expressed
ENSG00000206977.1	snoRNA	non-expressed
ENSG00000260563.3	lincRNA	expressed
ENSG00000263628.1	miRNA	non-expressed
ENSG00000186815.11	protein_coding	expressed
ENSG00000134240.10	protein_coding	expressed
ENSG00000269692.1	processed_pseudogene	non-expressed
ENSG00000226337.3	lincRNA	expressed
ENSG00000271088.1	processed_pseudogene	non-expressed
ENSG00000166266.12	protein_coding	expressed
ENSG00000225381.2	processed_pseudogene	non-expressed
ENSG00000159377.9	protein_coding	expressed
ENSG00000249312.1	processed_pseudogene	non-expressed
ENSG00000188372.13	protein_coding	expressed
ENSG00000230578.3	transcribed_unprocessed_pseudogene	non-expressed
ENSG00000227244.2	lincRNA	expressed
ENSG00000274363.1	lincRNA	expressed
ENSG00000234929.1	lincRNA	expressed
ENSG00000250594.2	processed_pseudogene	non-expressed
ENSG00000070729.12	protein_coding	expressed
ENSG00000115295.18	protein_coding	expressed
ENSG00000243352.3	misc_RNA	expressed
ENSG00000235264.1	processed_pseudogene	non-expressed
ENSG00000254342.1	processed_pseudogene	non-expressed
ENSG00000198920.8	protein_coding	expressed
ENSG00000202150.1	snRNA	non-expressed
ENSG00000244342.4	lincRNA	non-expressed
ENSG00000259149.1	lincRNA	non-expressed
ENSG00000212259.1	snRNA	non-expressed
ENSG00000215548.2	unprocessed_pseudogene	expressed
ENSG00000065328.15	protein_coding	expressed
ENSG00000222004.6	lincRNA	expressed
ENSG00000161091.11	protein_coding	expressed
ENSG00000263537.2	misc_RNA	non-expressed
ENSG00000238190.1	processed_pseudogene	non-expressed
ENSG00000223377.1	unprocessed_pseudogene	non-expressed
ENSG00000105248.14	protein_coding	expressed
ENSG00000146918.18	protein_coding	expressed
ENSG00000270826.1	processed_pseudogene	non-expressed
ENSG00000188801.9	processed_pseudogene	non-expressed
ENSG00000272109.1	antisense	expressed
ENSG00000242266.3	misc_RNA	non-expressed
ENSG00000248672.4	protein_coding	expressed
ENSG00000264007.1	sense_intronic	non-expressed
ENSG00000262500.1	processed_pseudogene	expressed
ENSG00000112394.15	protein_coding	expressed
ENSG00000279373.1	TEC	non-expressed
ENSG00000274150.1	unprocessed_pseudogene	non-expressed
ENSG00000255734.1	processed_pseudogene	non-expressed
ENSG00000260316.2	sense_intronic	expressed
ENSG00000186868.14	protein_coding	expressed
ENSG00000201713.1	rRNA	non-expressed
ENSG00000231046.1	antisense	non-expressed
ENSG00000280010.1	TEC	expressed
ENSG00000130312.5	protein_coding	expressed
ENSG00000223547.8	protein_coding	expressed
ENSG00000200377.1	snoRNA	non-expressed
ENSG00000258954.1	lincRNA	non-expressed
ENSG00000176438.11	protein_coding	expressed
ENSG00000174473.14	protein_coding	expressed
ENSG00000125818.16	protein_coding	expressed
ENSG00000223198.1	snRNA	expressed
ENSG00000104814.11	protein_coding	expressed
ENSG00000170590.7	lincRNA	non-expressed
ENSG00000108479.10	protein_coding	expressed
ENSG00000104870.11	protein_coding	expressed
ENSG00000181016.8	protein_coding	expressed
ENSG00000141034.8	protein_coding	expressed
ENSG00000277288.2	protein_coding	expressed
ENSG00000223403.3	lincRNA	expressed
ENSG00000253266.1	lincRNA	non-expressed
ENSG00000256092.2	lincRNA	expressed
ENSG00000212100.2	miRNA	non-expressed
ENSG00000239408.1	processed_pseudogene	non-expressed
ENSG00000268605.1	sense_intronic	non-expressed
ENSG00000268970.1	sense_intronic	expressed
ENSG00000245958.5	transcribed_unprocessed_pseudogene	expressed
ENSG00000212133.1	snRNA	non-expressed
ENSG00000232120.1	antisense	non-expressed
ENSG00000066739.10	protein_coding	expressed
ENSG00000244259.1	processed_pseudogene	non-expressed
ENSG00000236267.1	antisense	non-expressed
ENSG00000232537.1	lincRNA	non-expressed
ENSG00000181541.5	protein_coding	non-expressed
ENSG00000278531.1	unprocessed_pseudogene	non-expressed
ENSG00000264906.1	miRNA	non-expressed
ENSG00000213523.8	protein_coding	expressed
ENSG00000260662.2	processed_pseudogene	non-expressed
ENSG00000221471.1	miRNA	non-expressed
ENSG00000279410.1	TEC	non-expressed
ENSG00000200702.1	misc_RNA	non-expressed
ENSG00000245750.6	lincRNA	expressed
ENSG00000224351.2	processed_pseudogene	non-expressed
ENSG00000124493.12	protein_coding	expressed
ENSG00000249209.2	protein_coding	non-expressed
ENSG00000243063.1	IG_V_gene	expressed
ENSG00000231166.2	processed_pseudogene	non-expressed
ENSG00000249231.6	lincRNA	expressed
ENSG00000206712.1	snRNA	expressed
ENSG00000224813.2	transcribed_unprocessed_pseudogene	non-expressed
ENSG00000130707.16	protein_coding	expressed
ENSG00000261522.4	transcribed_unprocessed_pseudogene	expressed
ENSG00000227098.1	lincRNA	expressed
ENSG00000254987.1	lincRNA	non-expressed
ENSG00000210176.1	Mt_tRNA	non-expressed
ENSG00000259915.2	lincRNA	expressed
ENSG00000253540.4	transcribed_unprocessed_pseudogene	expressed
ENSG00000148908.13	protein_coding	expressed
ENSG00000271290.1	processed_pseudogene	non-expressed
ENSG00000276168.1	misc_RNA	non-expressed
ENSG00000259036.1	antisense	non-expressed
ENSG00000221421.1	miRNA	non-expressed
ENSG00000162692.9	protein_coding	expressed
ENSG00000170379.18	protein_coding	expressed
ENSG00000254175.1	IG_V_pseudogene	non-expressed
ENSG00000215802.3	transcribed_processed_pseudogene	non-expressed
ENSG00000244703.3	unprocessed_pseudogene	non-expressed
ENSG00000274385.1	snRNA	non-expressed
ENSG00000112715.19	protein_coding	expressed
ENSG00000096996.14	protein_coding	expressed
ENSG00000021355.11	protein_coding	expressed
ENSG00000230099.2	TR_V_gene	expressed
ENSG00000249406.1	lincRNA	non-expressed
ENSG00000141098.11	protein_coding	expressed
ENSG00000199620.1	rRNA	non-expressed
ENSG00000272282.1	lincRNA	expressed
ENSG00000182511.10	protein_coding	expressed
ENSG00000258892.1	processed_transcript	non-expressed
ENSG00000250896.1	processed_pseudogene	expressed
ENSG00000237705.1	antisense	non-expressed
ENSG00000216020.2	miRNA	non-expressed
ENSG00000268651.2	protein_coding	non-expressed
ENSG00000250492.1	processed_pseudogene	expressed
ENSG00000227971.1	processed_pseudogene	non-expressed
ENSG00000162374.15	protein_coding	expressed
ENSG00000147081.13	protein_coding	non-expressed
ENSG00000267253.1	processed_pseudogene	expressed
ENSG00000264251.2	misc_RNA	non-expressed
ENSG00000201178.1	misc_RNA	non-expressed
ENSG00000280861.1	miRNA	non-expressed
ENSG00000280021.1	polymorphic_pseudogene	non-expressed
ENSG00000139970.15	protein_coding	expressed
ENSG00000105427.8	protein_coding	expressed
ENSG00000204653.8	protein_coding	expressed
ENSG00000244642.3	misc_RNA	non-expressed
ENSG00000204983.11	protein_coding	non-expressed
ENSG00000255054.3	protein_coding	non-expressed
ENSG00000222276.1	snRNA	non-expressed
ENSG00000151364.14	protein_coding	expressed
ENSG00000206887.1	snRNA	non-expressed
ENSG00000260152.2	processed_pseudogene	non-expressed
ENSG00000143363.14	protein_coding	expressed
ENSG00000118046.13	protein_coding	expressed
ENSG00000240405.4	lincRNA	non-expressed
ENSG00000257899.1	processed_pseudogene	non-expressed
ENSG00000204949.7	antisense	non-expressed
ENSG00000277460.1	misc_RNA	non-expressed
ENSG00000254794.1	processed_pseudogene	non-expressed
ENSG00000154856.11	protein_coding	expressed
ENSG00000186174.11	protein_coding	expressed
ENSG00000199698.1	misc_RNA	non-expressed
ENSG00000258028.1	lincRNA	non-expressed
ENSG00000171234.12	protein_coding	expressed
ENSG00000166949.14	protein_coding	expressed
ENSG00000255361.1	processed_pseudogene	non-expressed
ENSG00000085274.14	protein_coding	expressed
ENSG00000259598.1	antisense	non-expressed
ENSG00000227304.3	transcribed_processed_pseudogene	expressed
ENSG00000223265.1	snRNA	non-expressed
ENSG00000199593.1	snoRNA	non-expressed
ENSG00000266595.1	miRNA	non-expressed
ENSG00000115568.14	protein_coding	expressed
ENSG00000261778.1	processed_pseudogene	non-expressed
ENSG00000147421.16	protein_coding	expressed
ENSG00000250983.1	processed_pseudogene	non-expressed
ENSG00000264679.1	miRNA	non-expressed
ENSG00000146618.3	protein_coding	non-expressed
ENSG00000254812.1	antisense	expressed
ENSG00000205593.10	protein_coding	expressed
ENSG00000184110.13	protein_coding	expressed
ENSG00000271848.1	antisense	non-expressed
ENSG00000280687.1	miRNA	non-expressed
ENSG00000236896.1	antisense	non-expressed
ENSG00000137872.14	protein_coding	expressed
ENSG00000278215.1	processed_pseudogene	non-expressed
ENSG00000270961.1	IG_D_gene	non-expressed
ENSG00000145354.8	protein_coding	expressed
ENSG00000265736.1	miRNA	non-expressed
ENSG00000126337.12	protein_coding	expressed
[truncated: 59,469 more rows]

## Sheet: KIRP
gene	gene_type	status
[truncated: 60,483 more rows]

[truncated: 7 more sheets: LIHC, LUAD, LUSC, PRAD, STAD, THCA, UCEC]
