# Supplementary material for: Characterization of bidirectional gene pairs in The Cancer Genome Atlas (TCGA) dataset
Source: PeerJ. 2019 Jun 17;7:e7107. doi: 10.7717/peerj.7107 (PMC6585903; doi:10.7717/peerj.7107)
Supplement: Supplemental Information 9 [file peerj-07-7107-s009.xlsx]

## Sheet: BG-up_vs_up+down_vs_down
gene pair	number of TCGA datasets	TCGA datasets
ENSG00000269696.1.vs.ENSG00000197016.10	1	HNSC
ENSG00000183090.5.vs.ENSG00000246448.2	1	KIRC
ENSG00000257285.4.vs.ENSG00000100462.14	2	STAD,COAD
ENSG00000119655.7.vs.ENSG00000165898.12	1	LIHC
ENSG00000169217.7.vs.ENSG00000260219.2	2	KIRP,BRCA
ENSG00000139263.10.vs.ENSG00000257443.1	1	BLCA
ENSG00000253764.1.vs.ENSG00000176595.3	2	STAD,COAD
ENSG00000186493.10.vs.ENSG00000170561.11	2	STAD,LUAD
ENSG00000105738.9.vs.ENSG00000171804.8	1	BRCA
ENSG00000261334.1.vs.ENSG00000204054.10	1	STAD
ENSG00000011028.12.vs.ENSG00000274565.1	2	HNSC,KIRC
ENSG00000167904.13.vs.ENSG00000137574.9	4	STAD,LUAD,COAD,KIRC
ENSG00000188566.10.vs.ENSG00000187713.6	1	KIRC
ENSG00000277767.1.vs.ENSG00000088448.13	1	BRCA
ENSG00000025796.12.vs.ENSG00000272476.1	2	STAD,KIRC
ENSG00000156976.13.vs.ENSG00000263826.1	3	STAD,HNSC,KIRC
ENSG00000176142.11.vs.ENSG00000163389.9	3	LIHC,STAD,THCA
ENSG00000133027.16.vs.ENSG00000264666.1	2	STAD,COAD
ENSG00000106524.7.vs.ENSG00000136261.13	1	LUSC
ENSG00000227540.1.vs.ENSG00000182180.12	2	LUAD,UCEC
ENSG00000204685.6.vs.ENSG00000084090.12	2	LIHC,BRCA
ENSG00000189157.12.vs.ENSG00000138760.7	2	LIHC,PRAD
ENSG00000148985.18.vs.ENSG00000110713.14	1	BLCA
ENSG00000198794.10.vs.ENSG00000178718.6	2	KIRC,KIRP
ENSG00000090861.14.vs.ENSG00000157349.14	2	PRAD,KIRP
ENSG00000168484.11.vs.ENSG00000168481.7	1	THCA
ENSG00000172057.8.vs.ENSG00000264968.1	3	STAD,COAD,BRCA
ENSG00000105376.4.vs.ENSG00000267607.1	4	LUAD,LUSC,BRCA,UCEC
ENSG00000171700.12.vs.ENSG00000125510.14	1	LIHC
ENSG00000267060.4.vs.ENSG00000198863.6	2	LUAD,HNSC
ENSG00000268001.1.vs.ENSG00000105483.15	3	LUAD,BLCA,BRCA
ENSG00000256690.1.vs.ENSG00000162236.10	1	UCEC
ENSG00000125970.10.vs.ENSG00000228265.4	1	THCA
ENSG00000184661.12.vs.ENSG00000104756.14	1	KIRP
ENSG00000004142.10.vs.ENSG00000244045.9	1	BRCA
ENSG00000105641.3.vs.ENSG00000279617.1	1	STAD
ENSG00000183098.9.vs.ENSG00000278177.1	4	PRAD,HNSC,KIRP,BRCA
ENSG00000238107.1.vs.ENSG00000231196.3	1	STAD
ENSG00000259685.2.vs.ENSG00000182054.8	1	LIHC
ENSG00000146085.7.vs.ENSG00000031691.6	2	COAD,BRCA
ENSG00000170222.11.vs.ENSG00000133028.9	3	COAD,HNSC,BRCA
ENSG00000093183.12.vs.ENSG00000114857.16	2	STAD,HNSC
ENSG00000106263.16.vs.ENSG00000106266.7	1	STAD
ENSG00000073578.15.vs.ENSG00000164366.3	1	LUSC
ENSG00000272384.1.vs.ENSG00000178764.7	1	BRCA
ENSG00000059769.18.vs.ENSG00000204173.9	3	LIHC,COAD,UCEC
ENSG00000062716.9.vs.ENSG00000141378.14	3	COAD,KIRC,BRCA
ENSG00000103353.14.vs.ENSG00000103356.14	2	LUSC,BLCA
ENSG00000140832.8.vs.ENSG00000260593.1	2	STAD,BRCA
ENSG00000231663.1.vs.ENSG00000168275.13	1	LIHC
ENSG00000181433.8.vs.ENSG00000269586.6	2	STAD,HNSC
ENSG00000119638.11.vs.ENSG00000259138.1	1	BRCA
ENSG00000083817.8.vs.ENSG00000171649.10	3	STAD,PRAD,BRCA
ENSG00000180596.7.vs.ENSG00000180573.9	2	THCA,UCEC
ENSG00000168301.11.vs.ENSG00000272360.1	2	STAD,PRAD
ENSG00000129472.11.vs.ENSG00000092203.12	2	LUAD,BRCA
ENSG00000279393.1.vs.ENSG00000102755.9	1	PRAD
ENSG00000143195.11.vs.ENSG00000143194.11	1	BLCA
ENSG00000168237.16.vs.ENSG00000164091.10	2	KIRP,BRCA
ENSG00000227533.4.vs.ENSG00000117394.18	3	COAD,KIRP,BRCA
ENSG00000141965.4.vs.ENSG00000268536.1	1	LUSC
ENSG00000226969.1.vs.ENSG00000067606.14	1	LUAD
ENSG00000265354.3.vs.ENSG00000239883.7	3	LIHC,BRCA,UCEC
ENSG00000198804.2.vs.ENSG00000210144.1	1	KIRC
ENSG00000257327.1.vs.ENSG00000111696.10	3	LUAD,BRCA,THCA
ENSG00000123200.15.vs.ENSG00000235903.6	1	LIHC
ENSG00000223855.1.vs.ENSG00000197461.12	2	COAD,BRCA
ENSG00000070423.16.vs.ENSG00000267666.1	2	LUSC,COAD
ENSG00000125965.7.vs.ENSG00000126001.14	2	PRAD,BRCA
ENSG00000182628.11.vs.ENSG00000068489.11	2	BLCA,BRCA
ENSG00000226419.5.vs.ENSG00000155380.10	3	PRAD,KIRC,KIRP
ENSG00000100938.16.vs.ENSG00000255526.5	1	HNSC
ENSG00000260018.1.vs.ENSG00000140943.15	1	HNSC
ENSG00000149599.14.vs.ENSG00000131044.15	1	THCA
ENSG00000267121.4.vs.ENSG00000184922.12	3	LUAD,PRAD,BLCA
ENSG00000095794.18.vs.ENSG00000230534.5	1	UCEC
ENSG00000170037.12.vs.ENSG00000170043.10	3	STAD,COAD,UCEC
ENSG00000107758.14.vs.ENSG00000221817.8	1	BLCA
ENSG00000106105.12.vs.ENSG00000196295.10	1	LUSC
ENSG00000168615.10.vs.ENSG00000169490.15	2	LUAD,BRCA
ENSG00000277258.3.vs.ENSG00000277182.1	2	BLCA,BRCA
ENSG00000260078.3.vs.ENSG00000261804.1	1	PRAD
ENSG00000203279.3.vs.ENSG00000255036.4	1	STAD
ENSG00000177354.10.vs.ENSG00000236208.1	1	HNSC
ENSG00000257696.1.vs.ENSG00000111647.11	1	KIRC
ENSG00000164291.15.vs.ENSG00000198677.9	2	LUAD,BRCA
ENSG00000111790.12.vs.ENSG00000064102.13	1	STAD
ENSG00000103253.16.vs.ENSG00000162004.15	3	HNSC,KIRC,BRCA
ENSG00000144134.17.vs.ENSG00000240356.5	1	LIHC
ENSG00000104671.6.vs.ENSG00000271869.1	1	PRAD
ENSG00000166478.8.vs.ENSG00000268403.2	1	BLCA
ENSG00000103266.9.vs.ENSG00000260394.2	2	BRCA,UCEC
ENSG00000181418.7.vs.ENSG00000257913.2	3	BLCA,COAD,UCEC
ENSG00000230445.4.vs.ENSG00000238021.5	1	THCA
ENSG00000148396.17.vs.ENSG00000196366.3	3	LIHC,HNSC,KIRC
ENSG00000253729.6.vs.ENSG00000104738.15	4	LUAD,PRAD,KIRC,BRCA
ENSG00000267416.1.vs.ENSG00000068097.13	2	STAD,BRCA
ENSG00000277224.1.vs.ENSG00000196866.2	2	STAD,LUSC
ENSG00000204758.6.vs.ENSG00000037241.6	4	LUAD,HNSC,KIRP,UCEC
ENSG00000144136.9.vs.ENSG00000237753.1	3	STAD,KIRP,THCA
ENSG00000233930.3.vs.ENSG00000184545.9	2	STAD,BLCA
ENSG00000047578.11.vs.ENSG00000077235.16	2	BLCA,BRCA
ENSG00000175854.10.vs.ENSG00000167110.15	3	LIHC,HNSC,UCEC
ENSG00000141424.11.vs.ENSG00000134759.12	4	PRAD,KIRP,BRCA,UCEC
ENSG00000183770.5.vs.ENSG00000206262.7	1	LUSC
ENSG00000234685.1.vs.ENSG00000262619.1	3	STAD,PRAD,BLCA
ENSG00000005469.10.vs.ENSG00000182165.16	1	LUAD
ENSG00000113263.11.vs.ENSG00000135077.7	5	LUAD,BLCA,COAD,HNSC,BRCA
ENSG00000263325.1.vs.ENSG00000005001.8	3	LUAD,COAD,BRCA
ENSG00000025434.17.vs.ENSG00000134575.8	1	COAD
ENSG00000204308.7.vs.ENSG00000204310.9	3	LUSC,COAD,BRCA
ENSG00000198930.11.vs.ENSG00000213401.7	2	COAD,BRCA
ENSG00000232871.7.vs.ENSG00000105516.9	1	LUSC
ENSG00000130347.11.vs.ENSG00000130348.10	2	LIHC,LUSC
ENSG00000278934.1.vs.ENSG00000121440.13	3	PRAD,KIRP,THCA
ENSG00000204536.12.vs.ENSG00000137310.10	2	LIHC,COAD
ENSG00000260572.1.vs.ENSG00000163590.12	1	LUAD
ENSG00000089009.14.vs.ENSG00000179295.14	2	COAD,UCEC
ENSG00000012048.18.vs.ENSG00000198496.9	1	PRAD
ENSG00000114784.3.vs.ENSG00000280739.1	2	LUSC,BRCA
ENSG00000175348.9.vs.ENSG00000254860.4	1	BLCA
ENSG00000165775.16.vs.ENSG00000185010.12	3	STAD,BLCA,HNSC
ENSG00000154479.11.vs.ENSG00000213160.8	3	LIHC,LUAD,UCEC
ENSG00000185049.11.vs.ENSG00000243449.5	1	BLCA
ENSG00000125354.21.vs.ENSG00000279601.1	2	STAD,LUSC
ENSG00000160551.8.vs.ENSG00000264808.1	1	BRCA
ENSG00000189171.12.vs.ENSG00000160679.11	1	LUAD
ENSG00000225637.1.vs.ENSG00000237989.1	1	STAD
ENSG00000242622.1.vs.ENSG00000082701.13	2	BLCA,KIRC
ENSG00000183307.3.vs.ENSG00000235478.3	1	PRAD
ENSG00000109189.11.vs.ENSG00000248866.1	3	STAD,LUAD,KIRP
ENSG00000122512.13.vs.ENSG00000106305.8	2	STAD,COAD
ENSG00000170946.13.vs.ENSG00000170959.13	2	LIHC,BLCA
ENSG00000174516.13.vs.ENSG00000174547.12	3	LIHC,COAD,HNSC
ENSG00000260852.1.vs.ENSG00000099364.15	1	BLCA
ENSG00000076984.16.vs.ENSG00000214248.2	1	COAD
ENSG00000165609.11.vs.ENSG00000151465.12	3	STAD,HNSC,BRCA
ENSG00000235501.4.vs.ENSG00000117519.14	1	STAD
ENSG00000257921.4.vs.ENSG00000037897.15	1	BLCA
ENSG00000272447.1.vs.ENSG00000225484.5	1	BRCA
ENSG00000272030.1.vs.ENSG00000160679.11	1	STAD
ENSG00000245213.5.vs.ENSG00000109586.10	3	LUAD,PRAD,KIRP
ENSG00000134905.15.vs.ENSG00000153487.12	3	LIHC,HNSC,BRCA
ENSG00000269364.1.vs.ENSG00000197360.8	3	KIRP,BRCA,THCA
ENSG00000114473.12.vs.ENSG00000185621.10	2	STAD,HNSC
ENSG00000117593.9.vs.ENSG00000120334.14	1	LUSC
ENSG00000231133.5.vs.ENSG00000225978.3	3	STAD,COAD,UCEC
ENSG00000228192.6.vs.ENSG00000164011.16	1	STAD
ENSG00000128311.12.vs.ENSG00000128309.15	3	STAD,LUAD,KIRC
ENSG00000111897.6.vs.ENSG00000135549.13	1	LIHC
ENSG00000180346.3.vs.ENSG00000138640.13	2	PRAD,BRCA
ENSG00000178971.12.vs.ENSG00000178921.12	2	STAD,BRCA
ENSG00000060982.13.vs.ENSG00000255921.1	2	LUAD,HNSC
ENSG00000107821.13.vs.ENSG00000273162.1	3	LUAD,KIRC,BRCA
ENSG00000235919.4.vs.ENSG00000116539.9	1	LUAD
ENSG00000103152.10.vs.ENSG00000007384.14	5	STAD,LUAD,HNSC,BRCA,THCA
ENSG00000245680.8.vs.ENSG00000188283.10	1	BRCA
ENSG00000115661.12.vs.ENSG00000163521.14	3	BLCA,HNSC,BRCA
ENSG00000089195.13.vs.ENSG00000125885.12	3	STAD,HNSC,KIRP
ENSG00000213995.10.vs.ENSG00000275880.1	3	LIHC,BRCA,UCEC
ENSG00000109814.10.vs.ENSG00000249348.1	1	LUAD
ENSG00000159069.12.vs.ENSG00000176919.10	1	LIHC
ENSG00000168303.6.vs.ENSG00000175600.14	1	HNSC
ENSG00000198221.8.vs.ENSG00000130396.19	2	BLCA,UCEC
ENSG00000180822.10.vs.ENSG00000137285.9	1	BRCA
ENSG00000066136.18.vs.ENSG00000272145.1	1	STAD
ENSG00000256312.1.vs.ENSG00000256576.2	2	COAD,THCA
ENSG00000231652.2.vs.ENSG00000156535.12	2	BRCA,THCA
ENSG00000174013.7.vs.ENSG00000185798.7	3	LUAD,PRAD,KIRC
ENSG00000108474.15.vs.ENSG00000141027.19	2	COAD,BRCA
ENSG00000231752.4.vs.ENSG00000272583.1	1	LUSC
ENSG00000275180.1.vs.ENSG00000221949.5	2	BRCA,THCA
ENSG00000108439.8.vs.ENSG00000234494.6	4	LUAD,PRAD,KIRP,UCEC
ENSG00000114767.6.vs.ENSG00000041880.13	2	PRAD,HNSC
ENSG00000180185.10.vs.ENSG00000063854.11	4	STAD,KIRP,BRCA,UCEC
ENSG00000185515.13.vs.ENSG00000182712.14	1	STAD
ENSG00000100601.8.vs.ENSG00000119705.8	2	STAD,BRCA
ENSG00000072849.9.vs.ENSG00000167842.14	4	STAD,COAD,HNSC,BRCA
ENSG00000082258.11.vs.ENSG00000224043.6	1	STAD
ENSG00000162972.9.vs.ENSG00000162971.9	1	BRCA
ENSG00000179715.11.vs.ENSG00000139211.6	4	STAD,LUSC,COAD,THCA
ENSG00000260469.2.vs.ENSG00000205363.5	2	KIRP,UCEC
ENSG00000134897.12.vs.ENSG00000134901.11	1	UCEC
ENSG00000168938.5.vs.ENSG00000249996.1	2	LUAD,BRCA
ENSG00000146966.11.vs.ENSG00000133597.8	3	LIHC,PRAD,BRCA
ENSG00000125869.8.vs.ENSG00000225988.1	1	THCA
ENSG00000188603.15.vs.ENSG00000184730.9	2	LIHC,STAD
ENSG00000272525.1.vs.ENSG00000145741.14	3	LIHC,LUSC,HNSC
ENSG00000163507.12.vs.ENSG00000198919.11	1	KIRC
ENSG00000157110.14.vs.ENSG00000254109.4	3	PRAD,HNSC,BRCA
ENSG00000273061.1.vs.ENSG00000106993.10	1	LIHC
ENSG00000139546.9.vs.ENSG00000270175.1	1	STAD
ENSG00000235706.6.vs.ENSG00000100697.13	1	BRCA
ENSG00000233153.4.vs.ENSG00000182247.8	1	PRAD
ENSG00000275636.1.vs.ENSG00000259584.1	2	LUAD,THCA
ENSG00000124209.3.vs.ENSG00000124224.15	1	STAD
ENSG00000163625.14.vs.ENSG00000180769.7	1	LIHC
ENSG00000186919.11.vs.ENSG00000167881.13	2	STAD,BRCA
ENSG00000225791.5.vs.ENSG00000065308.4	1	STAD
ENSG00000104907.11.vs.ENSG00000160877.5	5	LIHC,LUAD,LUSC,THCA,UCEC
ENSG00000255257.1.vs.ENSG00000132256.17	2	LUSC,BLCA
ENSG00000093010.10.vs.ENSG00000184470.18	2	LUAD,KIRP
ENSG00000168014.15.vs.ENSG00000214517.7	1	UCEC
ENSG00000177000.9.vs.ENSG00000011021.20	1	STAD
ENSG00000055147.16.vs.ENSG00000037749.10	3	LUAD,HNSC,BRCA
ENSG00000270988.1.vs.ENSG00000253764.1	1	COAD
ENSG00000128590.4.vs.ENSG00000135241.15	3	LUSC,PRAD,UCEC
ENSG00000117262.17.vs.ENSG00000272150.4	2	LIHC,LUSC
ENSG00000116954.7.vs.ENSG00000228436.2	2	LUAD,KIRP
ENSG00000187954.11.vs.ENSG00000167702.10	3	LUAD,COAD,KIRC
ENSG00000268573.1.vs.ENSG00000257267.2	2	LUAD,BLCA
ENSG00000186766.7.vs.ENSG00000279725.1	2	STAD,LUSC
ENSG00000172270.17.vs.ENSG00000267751.4	1	LUAD
ENSG00000173327.6.vs.ENSG00000197136.4	1	HNSC
ENSG00000163645.13.vs.ENSG00000240137.4	3	STAD,HNSC,KIRC
ENSG00000166405.13.vs.ENSG00000246820.2	1	STAD
ENSG00000114503.9.vs.ENSG00000270170.1	1	KIRC
ENSG00000172893.14.vs.ENSG00000172890.10	4	LUSC,PRAD,KIRC,KIRP
ENSG00000270419.1.vs.ENSG00000112531.15	1	PRAD
ENSG00000259863.1.vs.ENSG00000172985.10	3	STAD,PRAD,KIRC
ENSG00000156469.7.vs.ENSG00000156471.11	4	LUAD,LUSC,PRAD,COAD
ENSG00000168826.14.vs.ENSG00000145220.12	2	LIHC,BLCA
ENSG00000249898.6.vs.ENSG00000155189.10	3	LUAD,COAD,HNSC
ENSG00000274897.2.vs.ENSG00000177542.9	1	BRCA
ENSG00000214212.7.vs.ENSG00000099203.5	2	LUSC,KIRP
ENSG00000070367.14.vs.ENSG00000053770.10	1	KIRP
ENSG00000173915.11.vs.ENSG00000148843.12	3	LUAD,COAD,BRCA
ENSG00000226864.1.vs.ENSG00000107669.16	1	STAD
ENSG00000070366.12.vs.ENSG00000167720.11	2	LUAD,COAD
ENSG00000261008.5.vs.ENSG00000259768.5	2	PRAD,HNSC
ENSG00000261183.4.vs.ENSG00000166145.13	3	LIHC,BLCA,KIRP
ENSG00000260552.1.vs.ENSG00000075643.5	4	STAD,LUSC,KIRP,THCA
ENSG00000101470.8.vs.ENSG00000124104.17	3	STAD,LUSC,HNSC
ENSG00000119965.11.vs.ENSG00000179988.12	1	UCEC
ENSG00000177034.13.vs.ENSG00000113296.13	2	LUAD,THCA
ENSG00000272692.1.vs.ENSG00000273248.1	1	STAD
ENSG00000108509.19.vs.ENSG00000262227.1	4	STAD,COAD,KIRP,BRCA
ENSG00000116871.14.vs.ENSG00000054116.10	1	COAD
ENSG00000178950.15.vs.ENSG00000127419.15	1	LIHC
ENSG00000100129.16.vs.ENSG00000100124.11	2	HNSC,UCEC
ENSG00000179134.13.vs.ENSG00000269246.1	2	LUAD,BRCA
ENSG00000124571.16.vs.ENSG00000170734.10	3	LIHC,LUSC,PRAD
ENSG00000231312.5.vs.ENSG00000011566.13	3	LIHC,KIRP,UCEC
ENSG00000119888.9.vs.ENSG00000234690.5	1	STAD
ENSG00000231074.7.vs.ENSG00000204599.13	4	LIHC,LUSC,BRCA,UCEC
ENSG00000088682.12.vs.ENSG00000005194.13	3	LUSC,PRAD,UCEC
ENSG00000136521.11.vs.ENSG00000136522.12	2	STAD,KIRC
ENSG00000122687.16.vs.ENSG00000106268.14	2	KIRC,UCEC
ENSG00000238840.1.vs.ENSG00000187134.11	1	LUSC
ENSG00000204576.10.vs.ENSG00000204590.11	2	BLCA,COAD
ENSG00000160298.16.vs.ENSG00000160299.15	2	STAD,BRCA
ENSG00000203499.9.vs.ENSG00000180921.6	6	LIHC,LUAD,BLCA,COAD,KIRC,UCEC
ENSG00000173838.10.vs.ENSG00000265000.1	1	UCEC
ENSG00000134779.13.vs.ENSG00000150477.13	4	LIHC,BLCA,COAD,KIRP
ENSG00000267216.1.vs.ENSG00000268516.2	2	STAD,LUAD
ENSG00000136925.13.vs.ENSG00000136937.11	3	LIHC,COAD,UCEC
ENSG00000257150.2.vs.ENSG00000136014.10	2	PRAD,KIRC
ENSG00000129197.13.vs.ENSG00000108559.10	5	STAD,PRAD,COAD,HNSC,UCEC
ENSG00000118579.10.vs.ENSG00000249502.1	1	STAD
ENSG00000167985.5.vs.ENSG00000149532.14	1	LUSC
ENSG00000164008.12.vs.ENSG00000117385.14	1	COAD
ENSG00000160446.17.vs.ENSG00000223478.1	3	LUSC,HNSC,KIRC
ENSG00000118454.11.vs.ENSG00000197568.12	1	LIHC
ENSG00000151491.11.vs.ENSG00000023734.9	1	STAD
ENSG00000169621.8.vs.ENSG00000204923.3	2	LUSC,UCEC
ENSG00000267414.1.vs.ENSG00000152217.15	1	PRAD
ENSG00000262089.1.vs.ENSG00000108839.10	1	COAD
ENSG00000164438.5.vs.ENSG00000275038.1	1	HNSC
ENSG00000066923.16.vs.ENSG00000213420.6	1	BRCA
ENSG00000279329.1.vs.ENSG00000089335.19	3	LIHC,STAD,BRCA
ENSG00000255717.5.vs.ENSG00000168003.15	2	BRCA,THCA
ENSG00000253710.2.vs.ENSG00000123191.12	1	PRAD
ENSG00000145907.13.vs.ENSG00000275765.3	1	KIRC
ENSG00000139910.18.vs.ENSG00000257842.4	2	STAD,BLCA
ENSG00000015153.13.vs.ENSG00000134283.16	1	LIHC
ENSG00000138459.7.vs.ENSG00000144848.9	1	KIRC
ENSG00000078967.11.vs.ENSG00000106608.15	2	STAD,LUSC
ENSG00000236859.5.vs.ENSG00000074054.16	1	BLCA
ENSG00000171862.8.vs.ENSG00000227268.3	3	STAD,LUAD,BLCA
ENSG00000140284.9.vs.ENSG00000104043.13	3	STAD,HNSC,BRCA
ENSG00000169955.7.vs.ENSG00000235560.3	1	BRCA
ENSG00000013810.17.vs.ENSG00000168936.9	1	UCEC
ENSG00000135211.5.vs.ENSG00000006576.15	1	COAD
ENSG00000200714.1.vs.ENSG00000272010.1	4	LUAD,COAD,KIRC,BRCA
ENSG00000228889.5.vs.ENSG00000134882.14	3	BLCA,COAD,BRCA
ENSG00000262050.1.vs.ENSG00000132361.15	1	COAD
ENSG00000148926.8.vs.ENSG00000254554.1	2	KIRP,BRCA
ENSG00000179630.9.vs.ENSG00000151773.11	1	STAD
ENSG00000067560.9.vs.ENSG00000145022.4	2	LUSC,BLCA
ENSG00000105479.14.vs.ENSG00000142227.9	1	HNSC
ENSG00000259494.1.vs.ENSG00000181991.14	4	LUSC,KIRC,BRCA,UCEC
ENSG00000181924.6.vs.ENSG00000175575.11	4	LUAD,HNSC,KIRP,THCA
ENSG00000113319.10.vs.ENSG00000251450.1	3	STAD,KIRC,THCA
ENSG00000250522.1.vs.ENSG00000236699.7	1	BRCA
ENSG00000198952.8.vs.ENSG00000163472.17	1	COAD
ENSG00000005206.15.vs.ENSG00000130332.13	2	LIHC,LUSC
ENSG00000230530.1.vs.ENSG00000211456.9	1	STAD
ENSG00000226812.2.vs.ENSG00000101076.15	3	STAD,LUAD,BLCA
ENSG00000117620.11.vs.ENSG00000228084.1	1	LUAD
ENSG00000268471.4.vs.ENSG00000109670.12	2	LIHC,BRCA
ENSG00000223891.4.vs.ENSG00000132823.9	2	STAD,BRCA
ENSG00000174720.14.vs.ENSG00000138658.14	2	LUSC,BRCA
ENSG00000116679.14.vs.ENSG00000273004.1	2	LUAD,LUSC
ENSG00000116138.11.vs.ENSG00000132906.16	2	LIHC,BRCA
ENSG00000108384.13.vs.ENSG00000121101.14	1	STAD
ENSG00000096070.18.vs.ENSG00000246982.5	2	LUSC,COAD
ENSG00000279605.1.vs.ENSG00000147813.14	2	LUAD,COAD
ENSG00000147421.16.vs.ENSG00000104299.13	2	HNSC,KIRC
ENSG00000250432.4.vs.ENSG00000250742.1	1	STAD
ENSG00000261786.1.vs.ENSG00000280435.1	3	STAD,LUAD,KIRC
ENSG00000263551.4.vs.ENSG00000272461.1	3	STAD,LUSC,HNSC
ENSG00000162851.7.vs.ENSG00000162852.12	1	LUSC
ENSG00000198060.8.vs.ENSG00000107864.13	4	LUSC,BLCA,BRCA,UCEC
ENSG00000140632.15.vs.ENSG00000118900.13	2	STAD,LUSC
ENSG00000136870.9.vs.ENSG00000136897.7	3	LIHC,LUSC,BRCA
ENSG00000172071.10.vs.ENSG00000234028.3	1	STAD
ENSG00000168310.9.vs.ENSG00000271646.1	2	LUSC,BRCA
ENSG00000074855.9.vs.ENSG00000130299.15	5	LIHC,LUAD,LUSC,COAD,HNSC
ENSG00000116198.11.vs.ENSG00000169598.14	1	LIHC
ENSG00000105669.11.vs.ENSG00000105671.10	3	LIHC,LUSC,BRCA
ENSG00000102977.12.vs.ENSG00000102981.8	2	STAD,COAD
ENSG00000267191.1.vs.ENSG00000267058.1	4	STAD,HNSC,BRCA,THCA
ENSG00000196741.5.vs.ENSG00000147124.11	1	UCEC
ENSG00000158411.9.vs.ENSG00000185414.18	2	STAD,PRAD
ENSG00000136367.13.vs.ENSG00000259431.4	1	STAD
ENSG00000152117.16.vs.ENSG00000173272.12	1	BLCA
ENSG00000197622.11.vs.ENSG00000143458.10	1	LUAD
ENSG00000233554.4.vs.ENSG00000086062.11	1	KIRP
ENSG00000130193.7.vs.ENSG00000253741.1	2	LIHC,LUAD
ENSG00000122435.8.vs.ENSG00000156876.9	1	THCA
ENSG00000197181.10.vs.ENSG00000254064.1	1	HNSC
ENSG00000105619.12.vs.ENSG00000105618.12	2	COAD,BRCA
ENSG00000140406.3.vs.ENSG00000277782.1	1	PRAD
ENSG00000168779.18.vs.ENSG00000174891.11	1	LUAD
ENSG00000125734.12.vs.ENSG00000125733.16	2	STAD,LUSC
ENSG00000167625.9.vs.ENSG00000160570.12	1	BRCA
ENSG00000177133.9.vs.ENSG00000142611.15	1	UCEC
ENSG00000166130.13.vs.ENSG00000120868.12	1	KIRC
ENSG00000254996.4.vs.ENSG00000249637.1	1	BRCA
ENSG00000221083.1.vs.ENSG00000270282.1	1	COAD
ENSG00000133112.15.vs.ENSG00000170919.14	1	BRCA
ENSG00000100104.11.vs.ENSG00000100099.19	4	LUAD,LUSC,COAD,BRCA
ENSG00000185904.10.vs.ENSG00000182632.13	2	STAD,LUSC
ENSG00000116209.10.vs.ENSG00000116205.9	2	LIHC,BRCA
ENSG00000185808.12.vs.ENSG00000182670.12	1	LUSC
ENSG00000162086.13.vs.ENSG00000140993.9	2	LUAD,KIRP
ENSG00000222020.2.vs.ENSG00000068024.15	1	PRAD
ENSG00000178966.14.vs.ENSG00000165119.17	4	LIHC,LUSC,BLCA,KIRC
ENSG00000128626.10.vs.ENSG00000104835.13	2	LUAD,BRCA
ENSG00000247708.6.vs.ENSG00000168818.8	2	THCA,UCEC
ENSG00000092969.10.vs.ENSG00000232480.1	3	PRAD,BLCA,UCEC
ENSG00000242288.9.vs.ENSG00000250959.2	1	BRCA
ENSG00000108773.9.vs.ENSG00000260325.1	1	LUAD
ENSG00000160993.3.vs.ENSG00000161036.9	2	LUAD,KIRC
ENSG00000073584.17.vs.ENSG00000278834.1	4	STAD,LUAD,BLCA,BRCA
ENSG00000167522.13.vs.ENSG00000197912.12	1	LIHC
ENSG00000102904.13.vs.ENSG00000141084.9	3	LIHC,KIRP,THCA
ENSG00000215421.8.vs.ENSG00000264247.1	2	LIHC,BLCA
ENSG00000167552.12.vs.ENSG00000167553.13	1	LUAD
ENSG00000037637.9.vs.ENSG00000055070.15	1	LIHC
ENSG00000069812.10.vs.ENSG00000187017.13	1	BLCA
ENSG00000087301.7.vs.ENSG00000180998.10	3	STAD,LUAD,BRCA
ENSG00000102871.14.vs.ENSG00000135722.7	1	KIRC
ENSG00000277449.1.vs.ENSG00000172216.5	2	STAD,BRCA
ENSG00000132952.10.vs.ENSG00000189403.13	2	COAD,BRCA
ENSG00000170634.11.vs.ENSG00000068878.13	1	KIRC
ENSG00000197406.7.vs.ENSG00000258498.5	2	LUSC,THCA
ENSG00000173273.14.vs.ENSG00000272267.2	1	STAD
ENSG00000281849.1.vs.ENSG00000167393.15	1	PRAD
ENSG00000182134.14.vs.ENSG00000203288.3	3	LUAD,LUSC,PRAD
ENSG00000268628.2.vs.ENSG00000233895.1	2	STAD,COAD
ENSG00000214851.4.vs.ENSG00000245105.2	1	STAD
ENSG00000166170.9.vs.ENSG00000126214.19	1	BRCA
ENSG00000175193.11.vs.ENSG00000234371.6	1	STAD
ENSG00000112902.10.vs.ENSG00000250786.1	3	STAD,PRAD,THCA
ENSG00000092964.15.vs.ENSG00000240694.7	2	PRAD,BRCA
ENSG00000051128.17.vs.ENSG00000269019.1	3	LIHC,KIRC,THCA
ENSG00000241043.1.vs.ENSG00000232303.2	1	LIHC
ENSG00000062650.16.vs.ENSG00000227896.2	3	STAD,BRCA,UCEC
ENSG00000184669.7.vs.ENSG00000166689.13	3	LUAD,LUSC,BLCA
ENSG00000165097.12.vs.ENSG00000137364.4	6	STAD,LUSC,PRAD,COAD,KIRC,BRCA
ENSG00000178904.17.vs.ENSG00000267213.4	1	BRCA
ENSG00000127220.5.vs.ENSG00000130311.9	3	LIHC,LUAD,LUSC
ENSG00000167083.5.vs.ENSG00000108798.7	4	LIHC,LUSC,HNSC,BRCA
ENSG00000182568.15.vs.ENSG00000228956.7	1	COAD
ENSG00000185015.6.vs.ENSG00000176731.10	4	STAD,LUAD,COAD,UCEC
ENSG00000008018.8.vs.ENSG00000112592.11	2	LIHC,KIRP
ENSG00000244649.3.vs.ENSG00000272763.1	5	STAD,LUSC,PRAD,BLCA,HNSC
ENSG00000149308.15.vs.ENSG00000149311.16	2	LUAD,BRCA
ENSG00000169689.13.vs.ENSG00000169683.6	2	KIRP,THCA
ENSG00000183308.6.vs.ENSG00000115942.7	1	LIHC
ENSG00000257621.6.vs.ENSG00000032219.17	1	BRCA
ENSG00000198105.10.vs.ENSG00000236514.1	1	KIRP
ENSG00000103363.13.vs.ENSG00000276791.1	2	LUSC,BLCA
ENSG00000177683.12.vs.ENSG00000128590.4	2	LUSC,PRAD
ENSG00000268006.1.vs.ENSG00000104960.14	4	LIHC,STAD,LUAD,BRCA
ENSG00000176101.10.vs.ENSG00000176248.8	5	LIHC,LUSC,HNSC,KIRC,BRCA
ENSG00000232907.6.vs.ENSG00000118707.8	2	PRAD,BRCA
ENSG00000274925.1.vs.ENSG00000155592.14	3	LUSC,BRCA,UCEC
ENSG00000151503.11.vs.ENSG00000151502.9	1	UCEC
ENSG00000184270.4.vs.ENSG00000178096.8	1	STAD
ENSG00000141456.13.vs.ENSG00000244184.1	3	STAD,LUAD,COAD
ENSG00000102393.8.vs.ENSG00000126945.8	2	STAD,HNSC
ENSG00000169908.9.vs.ENSG00000240541.2	6	LUSC,PRAD,COAD,HNSC,KIRC,UCEC
ENSG00000212978.6.vs.ENSG00000237651.5	1	BRCA
ENSG00000175505.10.vs.ENSG00000275484.1	3	LIHC,STAD,BRCA
ENSG00000153066.11.vs.ENSG00000262420.3	1	LIHC
ENSG00000104689.8.vs.ENSG00000246582.2	3	PRAD,BRCA,THCA
ENSG00000103942.11.vs.ENSG00000169612.3	1	BRCA
ENSG00000105810.8.vs.ENSG00000237819.4	3	STAD,LUAD,KIRC
ENSG00000187824.7.vs.ENSG00000263400.5	5	STAD,LUAD,COAD,KIRC,BRCA
ENSG00000198198.12.vs.ENSG00000159479.15	2	LIHC,LUSC
ENSG00000246225.5.vs.ENSG00000198168.7	2	PRAD,COAD
ENSG00000076924.10.vs.ENSG00000229833.8	2	LIHC,LUSC
ENSG00000109475.15.vs.ENSG00000234492.4	1	HNSC
ENSG00000148291.8.vs.ENSG00000148290.8	1	BLCA
ENSG00000117479.11.vs.ENSG00000213062.4	3	LUSC,KIRC,KIRP
ENSG00000265489.1.vs.ENSG00000006740.15	2	COAD,KIRC
ENSG00000131473.15.vs.ENSG00000204815.7	3	STAD,BLCA,UCEC
ENSG00000266521.1.vs.ENSG00000046604.11	2	BLCA,HNSC
ENSG00000006634.6.vs.ENSG00000075303.11	3	STAD,COAD,HNSC
ENSG00000091651.7.vs.ENSG00000069329.14	2	COAD,BRCA
ENSG00000274092.1.vs.ENSG00000077238.12	2	STAD,LUAD
ENSG00000184937.11.vs.ENSG00000183242.10	3	COAD,KIRP,THCA
ENSG00000165526.7.vs.ENSG00000197798.7	1	KIRC
ENSG00000127990.14.vs.ENSG00000242265.4	3	HNSC,KIRC,BRCA
ENSG00000261064.1.vs.ENSG00000223509.7	2	STAD,KIRC
ENSG00000100554.10.vs.ENSG00000134001.11	1	BRCA
ENSG00000146731.9.vs.ENSG00000146733.12	2	STAD,THCA
ENSG00000122481.15.vs.ENSG00000226026.4	2	PRAD,THCA
ENSG00000260793.2.vs.ENSG00000108312.13	1	LUSC
ENSG00000204237.4.vs.ENSG00000185298.11	2	STAD,LUAD
ENSG00000114859.13.vs.ENSG00000163882.8	2	HNSC,KIRC
ENSG00000155100.9.vs.ENSG00000253738.1	2	LIHC,LUAD
ENSG00000129493.13.vs.ENSG00000250365.5	2	LUSC,KIRP
ENSG00000120925.12.vs.ENSG00000168172.7	1	COAD
ENSG00000246863.2.vs.ENSG00000166073.7	1	BRCA
ENSG00000163913.10.vs.ENSG00000129071.8	2	STAD,KIRC
ENSG00000268621.4.vs.ENSG00000268460.1	1	COAD
ENSG00000115827.12.vs.ENSG00000123600.17	2	STAD,LUAD
ENSG00000160439.14.vs.ENSG00000131037.13	3	HNSC,KIRP,BRCA
ENSG00000258048.1.vs.ENSG00000177425.9	2	STAD,KIRC
ENSG00000113971.17.vs.ENSG00000248724.5	1	KIRC
ENSG00000181004.8.vs.ENSG00000224786.1	1	PRAD
ENSG00000111737.10.vs.ENSG00000277283.1	1	LUSC
ENSG00000225339.3.vs.ENSG00000186577.10	4	LIHC,LUSC,KIRC,BRCA
ENSG00000198382.7.vs.ENSG00000255507.4	2	HNSC,BRCA
ENSG00000168137.14.vs.ENSG00000206573.7	2	STAD,HNSC
ENSG00000177150.11.vs.ENSG00000101654.16	4	LUSC,KIRC,KIRP,UCEC
ENSG00000279035.1.vs.ENSG00000125458.5	1	BRCA
ENSG00000269386.4.vs.ENSG00000185236.10	2	LUSC,THCA
ENSG00000177640.14.vs.ENSG00000107560.9	2	LUAD,PRAD
ENSG00000280254.1.vs.ENSG00000182853.10	1	STAD
ENSG00000181218.5.vs.ENSG00000196890.4	2	LUAD,HNSC
ENSG00000074800.12.vs.ENSG00000230679.1	1	HNSC
ENSG00000113761.10.vs.ENSG00000087206.15	3	LUAD,HNSC,BRCA
ENSG00000025770.17.vs.ENSG00000100258.16	2	HNSC,KIRP
ENSG00000255468.5.vs.ENSG00000174684.6	2	LIHC,LUAD
ENSG00000255559.1.vs.ENSG00000196922.9	2	LUAD,PRAD
ENSG00000186352.7.vs.ENSG00000109771.14	3	LIHC,PRAD,UCEC
ENSG00000277383.1.vs.ENSG00000063169.9	2	LIHC,BRCA
ENSG00000275023.3.vs.ENSG00000275532.1	3	PRAD,BLCA,BRCA
ENSG00000149761.7.vs.ENSG00000149743.12	2	LUSC,KIRP
ENSG00000138668.17.vs.ENSG00000272677.1	1	STAD
ENSG00000235897.1.vs.ENSG00000213123.9	1	STAD
ENSG00000236548.1.vs.ENSG00000146373.15	1	LIHC
ENSG00000196678.12.vs.ENSG00000102897.8	2	BLCA,THCA
ENSG00000131462.6.vs.ENSG00000141699.9	3	PRAD,BLCA,BRCA
ENSG00000068885.13.vs.ENSG00000113810.14	2	STAD,KIRC
ENSG00000197168.10.vs.ENSG00000273523.1	4	STAD,BLCA,HNSC,THCA
ENSG00000258099.1.vs.ENSG00000204842.13	1	THCA
ENSG00000250208.5.vs.ENSG00000111432.4	3	BLCA,COAD,THCA
ENSG00000067601.7.vs.ENSG00000106610.13	4	LUAD,LUSC,COAD,UCEC
ENSG00000060762.17.vs.ENSG00000261420.1	3	LIHC,COAD,UCEC
ENSG00000138400.11.vs.ENSG00000118246.12	1	BRCA
ENSG00000132141.12.vs.ENSG00000005156.10	1	BRCA
ENSG00000247373.3.vs.ENSG00000086598.9	1	LIHC
ENSG00000234129.6.vs.ENSG00000004961.13	1	COAD
ENSG00000276223.1.vs.ENSG00000244558.4	2	COAD,BRCA
ENSG00000143630.8.vs.ENSG00000176444.17	3	LIHC,LUAD,LUSC
ENSG00000260277.1.vs.ENSG00000175267.13	2	BRCA,THCA
ENSG00000151164.17.vs.ENSG00000111237.17	2	STAD,BLCA
ENSG00000270049.1.vs.ENSG00000159720.10	1	KIRC
ENSG00000213741.7.vs.ENSG00000258568.1	1	COAD
ENSG00000148187.16.vs.ENSG00000119446.12	4	LIHC,STAD,LUSC,BLCA
ENSG00000136002.15.vs.ENSG00000233221.5	1	KIRP
ENSG00000223508.5.vs.ENSG00000172748.11	1	HNSC
ENSG00000205544.3.vs.ENSG00000169992.8	1	COAD
ENSG00000072110.12.vs.ENSG00000259062.2	2	HNSC,BRCA
ENSG00000183208.11.vs.ENSG00000185043.9	2	COAD,BRCA
ENSG00000135720.11.vs.ENSG00000246777.1	2	HNSC,KIRP
ENSG00000175334.6.vs.ENSG00000175376.7	3	LUSC,PRAD,HNSC
ENSG00000108469.13.vs.ENSG00000161526.13	3	STAD,PRAD,BRCA
ENSG00000246263.2.vs.ENSG00000048392.10	5	LIHC,STAD,LUAD,LUSC,THCA
ENSG00000110080.17.vs.ENSG00000280832.1	3	KIRC,KIRP,BRCA
ENSG00000119878.5.vs.ENSG00000151665.11	2	LIHC,BRCA
ENSG00000151466.10.vs.ENSG00000151470.11	4	LUSC,PRAD,BRCA,UCEC
ENSG00000166188.2.vs.ENSG00000103005.10	2	STAD,KIRP
ENSG00000013364.17.vs.ENSG00000238045.8	4	STAD,PRAD,KIRC,BRCA
ENSG00000166135.12.vs.ENSG00000166136.14	3	LUAD,LUSC,UCEC
ENSG00000245534.5.vs.ENSG00000128915.10	2	KIRC,BRCA
ENSG00000143850.11.vs.ENSG00000226330.1	1	STAD
ENSG00000113615.11.vs.ENSG00000152700.12	2	LUAD,BRCA
ENSG00000166783.18.vs.ENSG00000072864.11	1	BRCA
ENSG00000232442.1.vs.ENSG00000101216.9	1	LIHC
ENSG00000221838.8.vs.ENSG00000166508.16	3	LIHC,STAD,LUAD
ENSG00000267041.4.vs.ENSG00000267260.1	3	HNSC,KIRP,BRCA
ENSG00000105821.13.vs.ENSG00000161057.9	1	STAD
ENSG00000255038.1.vs.ENSG00000175115.10	1	LUAD
ENSG00000147548.15.vs.ENSG00000272092.1	1	LUAD
ENSG00000145293.13.vs.ENSG00000152795.16	1	BRCA
ENSG00000227172.2.vs.ENSG00000241127.6	1	COAD
ENSG00000133640.17.vs.ENSG00000231738.9	3	HNSC,THCA,UCEC
ENSG00000116985.9.vs.ENSG00000261798.1	1	BRCA
ENSG00000215808.2.vs.ENSG00000231877.1	1	STAD
ENSG00000204351.10.vs.ENSG00000204356.10	3	LUSC,BRCA,UCEC
ENSG00000205189.10.vs.ENSG00000251867.3	2	LUAD,PRAD
ENSG00000138376.9.vs.ENSG00000229267.2	1	BLCA
ENSG00000149633.10.vs.ENSG00000101425.11	2	STAD,THCA
ENSG00000170191.4.vs.ENSG00000213742.5	3	PRAD,COAD,THCA
ENSG00000273008.1.vs.ENSG00000169826.7	1	THCA
ENSG00000183305.12.vs.ENSG00000268902.2	1	STAD
ENSG00000123562.15.vs.ENSG00000231154.1	2	LIHC,LUAD
ENSG00000182397.13.vs.ENSG00000259363.4	1	KIRC
ENSG00000266947.1.vs.ENSG00000166750.8	4	LIHC,LUSC,BLCA,BRCA
ENSG00000107651.11.vs.ENSG00000197771.11	1	BRCA
ENSG00000225975.5.vs.ENSG00000189042.12	2	LIHC,BRCA
ENSG00000165416.13.vs.ENSG00000273723.1	1	BRCA
ENSG00000177084.15.vs.ENSG00000256632.3	1	KIRC
ENSG00000230753.4.vs.ENSG00000101421.3	1	STAD
ENSG00000134690.9.vs.ENSG00000116922.13	1	PRAD
ENSG00000171045.13.vs.ENSG00000261693.1	1	LUAD
ENSG00000100109.15.vs.ENSG00000261188.1	2	LUAD,BRCA
ENSG00000153015.14.vs.ENSG00000153006.13	2	LIHC,BLCA
ENSG00000137497.16.vs.ENSG00000184154.11	1	LUAD
ENSG00000138433.14.vs.ENSG00000144306.12	1	BRCA
ENSG00000071082.9.vs.ENSG00000223947.1	1	HNSC
ENSG00000173992.7.vs.ENSG00000182791.4	1	LUSC
ENSG00000178896.6.vs.ENSG00000255224.1	2	LUAD,BRCA
ENSG00000188243.11.vs.ENSG00000261553.4	1	BRCA
ENSG00000188001.8.vs.ENSG00000234076.1	1	COAD
ENSG00000005513.9.vs.ENSG00000103227.17	2	KIRP,UCEC
ENSG00000186866.15.vs.ENSG00000215447.6	2	STAD,LUSC
ENSG00000198001.12.vs.ENSG00000129317.13	1	LIHC
ENSG00000229043.2.vs.ENSG00000178381.10	2	COAD,BRCA
ENSG00000275645.1.vs.ENSG00000140398.12	2	STAD,KIRC
ENSG00000168876.7.vs.ENSG00000020922.11	2	HNSC,THCA
ENSG00000104369.4.vs.ENSG00000104381.11	3	LUAD,PRAD,COAD
ENSG00000274922.1.vs.ENSG00000068650.17	1	BRCA
ENSG00000140382.13.vs.ENSG00000173517.9	2	BLCA,HNSC
ENSG00000101850.11.vs.ENSG00000146950.11	2	LUSC,KIRC
ENSG00000146701.10.vs.ENSG00000127952.15	2	STAD,LUAD
ENSG00000204406.10.vs.ENSG00000115947.12	1	LUAD
ENSG00000232352.1.vs.ENSG00000012171.16	4	LIHC,LUSC,HNSC,BRCA
ENSG00000250579.1.vs.ENSG00000145536.14	3	LIHC,BLCA,KIRP
ENSG00000052841.13.vs.ENSG00000254907.1	1	PRAD
ENSG00000145868.15.vs.ENSG00000247199.3	1	LIHC
ENSG00000187013.4.vs.ENSG00000267280.4	2	COAD,THCA
ENSG00000231233.1.vs.ENSG00000120051.13	1	HNSC
ENSG00000237037.8.vs.ENSG00000270083.1	2	LIHC,BRCA
ENSG00000256053.6.vs.ENSG00000166170.9	1	BRCA
ENSG00000224934.2.vs.ENSG00000120053.10	1	UCEC
ENSG00000273148.1.vs.ENSG00000179935.8	2	LUAD,KIRC
ENSG00000214432.8.vs.ENSG00000184056.13	1	BRCA
ENSG00000269910.1.vs.ENSG00000269940.1	1	BRCA
ENSG00000167378.7.vs.ENSG00000124444.14	1	LUAD
ENSG00000250838.1.vs.ENSG00000159217.8	1	BLCA
ENSG00000168958.18.vs.ENSG00000236432.6	1	BLCA
ENSG00000259251.2.vs.ENSG00000129003.14	1	LIHC
ENSG00000114388.11.vs.ENSG00000114395.9	2	STAD,LUSC
ENSG00000155906.15.vs.ENSG00000146476.9	1	LIHC
ENSG00000251279.1.vs.ENSG00000188725.6	2	KIRC,BRCA
ENSG00000265660.1.vs.ENSG00000203499.9	1	KIRC
ENSG00000152942.17.vs.ENSG00000273841.3	1	LUAD
ENSG00000127586.15.vs.ENSG00000007376.6	6	LIHC,LUSC,COAD,KIRC,BRCA,UCEC
ENSG00000250846.5.vs.ENSG00000145242.12	1	UCEC
ENSG00000165688.10.vs.ENSG00000165689.15	3	LIHC,HNSC,UCEC
ENSG00000196663.14.vs.ENSG00000100865.13	1	BRCA
ENSG00000102312.19.vs.ENSG00000224292.1	1	COAD
ENSG00000137094.13.vs.ENSG00000281491.1	1	LUAD
ENSG00000070961.13.vs.ENSG00000271614.1	5	LIHC,STAD,PRAD,BLCA,KIRC
ENSG00000039123.14.vs.ENSG00000067248.8	1	BRCA
ENSG00000196388.7.vs.ENSG00000129250.10	3	LUAD,LUSC,BRCA
ENSG00000166140.16.vs.ENSG00000104129.8	2	LIHC,COAD
ENSG00000262165.1.vs.ENSG00000129219.12	2	STAD,LUAD
ENSG00000250251.5.vs.ENSG00000257391.1	1	BLCA
ENSG00000186141.7.vs.ENSG00000265491.4	4	LUAD,LUSC,HNSC,KIRC
ENSG00000268189.2.vs.ENSG00000105127.7	2	LIHC,LUSC
ENSG00000133114.16.vs.ENSG00000083635.7	1	BRCA
ENSG00000120896.12.vs.ENSG00000251034.1	2	LUAD,BRCA
ENSG00000267226.2.vs.ENSG00000172175.11	2	PRAD,BLCA
ENSG00000267296.2.vs.ENSG00000245848.2	2	LUAD,BRCA
ENSG00000186638.14.vs.ENSG00000164978.16	1	BRCA
ENSG00000180228.11.vs.ENSG00000204311.10	1	KIRC
ENSG00000236137.1.vs.ENSG00000116830.10	2	LUAD,COAD
ENSG00000184454.6.vs.ENSG00000264443.1	3	LIHC,BLCA,THCA
ENSG00000272933.1.vs.ENSG00000171206.12	3	STAD,PRAD,BRCA
ENSG00000267034.1.vs.ENSG00000237732.8	2	COAD,THCA
ENSG00000183935.5.vs.ENSG00000013583.7	1	COAD
ENSG00000272473.1.vs.ENSG00000267530.2	3	LIHC,LUSC,BRCA
ENSG00000126264.8.vs.ENSG00000167604.12	1	BLCA
ENSG00000186132.13.vs.ENSG00000155368.15	2	COAD,KIRP
ENSG00000273253.2.vs.ENSG00000073169.12	3	LIHC,LUAD,BLCA
ENSG00000171314.8.vs.ENSG00000052749.12	1	STAD
ENSG00000128513.13.vs.ENSG00000224897.5	1	KIRC
ENSG00000124659.6.vs.ENSG00000112624.11	1	BRCA
ENSG00000279296.1.vs.ENSG00000177294.6	3	LIHC,PRAD,BRCA
ENSG00000163637.10.vs.ENSG00000244564.1	1	STAD
ENSG00000163357.9.vs.ENSG00000163354.13	4	LUAD,COAD,KIRP,BRCA
ENSG00000100218.10.vs.ENSG00000100228.11	2	LUAD,KIRP
ENSG00000174886.11.vs.ENSG00000187650.3	1	LUSC
ENSG00000170615.13.vs.ENSG00000234715.1	1	STAD
ENSG00000214413.6.vs.ENSG00000108061.10	2	PRAD,UCEC
ENSG00000102580.13.vs.ENSG00000247400.3	2	LIHC,BRCA
ENSG00000257489.5.vs.ENSG00000075089.8	1	KIRC
ENSG00000213719.7.vs.ENSG00000255152.7	1	LUSC
ENSG00000143256.4.vs.ENSG00000158793.12	2	LUAD,BRCA
ENSG00000247081.6.vs.ENSG00000164930.10	1	LUAD
ENSG00000148950.8.vs.ENSG00000109911.16	3	LIHC,LUSC,BLCA
ENSG00000276805.1.vs.ENSG00000275858.1	2	LIHC,STAD
ENSG00000185129.5.vs.ENSG00000245146.5	2	LUAD,KIRC
ENSG00000107938.16.vs.ENSG00000234134.1	2	PRAD,UCEC
ENSG00000173588.13.vs.ENSG00000278916.1	1	BRCA
ENSG00000140471.15.vs.ENSG00000183475.11	2	LUSC,BRCA
ENSG00000178403.3.vs.ENSG00000249509.1	1	BRCA
ENSG00000120533.11.vs.ENSG00000120526.9	2	LIHC,COAD
ENSG00000221988.11.vs.ENSG00000204314.9	3	STAD,COAD,THCA
ENSG00000276903.1.vs.ENSG00000217646.1	2	LUSC,HNSC
ENSG00000264964.1.vs.ENSG00000128791.10	1	BLCA
ENSG00000128872.8.vs.ENSG00000140280.12	2	STAD,COAD
ENSG00000261226.1.vs.ENSG00000205018.2	1	BRCA
ENSG00000109775.9.vs.ENSG00000205129.7	3	KIRC,BRCA,THCA
ENSG00000254810.1.vs.ENSG00000236304.1	3	STAD,LUAD,PRAD
ENSG00000172733.11.vs.ENSG00000165392.8	1	KIRP
ENSG00000067064.9.vs.ENSG00000047056.13	1	BLCA
ENSG00000134326.10.vs.ENSG00000134321.10	5	STAD,LUSC,HNSC,KIRC,BRCA
ENSG00000271727.1.vs.ENSG00000272463.1	1	BRCA
ENSG00000198768.9.vs.ENSG00000231290.4	3	STAD,BRCA,THCA
ENSG00000197180.2.vs.ENSG00000071553.15	3	STAD,PRAD,HNSC
ENSG00000262136.1.vs.ENSG00000181019.11	1	THCA
ENSG00000256751.4.vs.ENSG00000121316.9	1	PRAD
ENSG00000166348.16.vs.ENSG00000268584.1	2	LUAD,BRCA
ENSG00000279491.1.vs.ENSG00000167996.14	3	COAD,BRCA,UCEC
ENSG00000157429.14.vs.ENSG00000260886.1	1	LUAD
ENSG00000137814.8.vs.ENSG00000180979.8	3	STAD,PRAD,KIRC
ENSG00000231721.5.vs.ENSG00000128585.16	1	PRAD
ENSG00000278514.1.vs.ENSG00000184056.13	1	LUSC
ENSG00000108518.7.vs.ENSG00000108515.16	1	HNSC
ENSG00000134461.14.vs.ENSG00000134452.18	1	STAD
ENSG00000172315.5.vs.ENSG00000271784.1	3	LIHC,BLCA,KIRP
ENSG00000228701.1.vs.ENSG00000107854.5	1	UCEC
ENSG00000177112.6.vs.ENSG00000110315.5	1	LUAD
ENSG00000226853.2.vs.ENSG00000163328.12	1	LIHC
ENSG00000172172.6.vs.ENSG00000172167.6	1	KIRC
ENSG00000040487.11.vs.ENSG00000053371.11	1	LUSC
ENSG00000100412.14.vs.ENSG00000100410.6	1	BRCA
ENSG00000206344.6.vs.ENSG00000272501.1	2	COAD,KIRC
ENSG00000188153.11.vs.ENSG00000197565.14	4	LIHC,STAD,LUSC,KIRC
ENSG00000048649.12.vs.ENSG00000087884.13	2	LUAD,HNSC
ENSG00000243224.1.vs.ENSG00000247596.7	1	LIHC
ENSG00000101224.16.vs.ENSG00000125817.7	5	STAD,HNSC,KIRC,KIRP,BRCA
ENSG00000275202.1.vs.ENSG00000102531.15	2	LIHC,BRCA
ENSG00000134109.9.vs.ENSG00000233912.1	2	STAD,BLCA
ENSG00000164032.10.vs.ENSG00000245322.5	2	STAD,COAD
ENSG00000274818.1.vs.ENSG00000100731.14	1	THCA
ENSG00000169255.12.vs.ENSG00000169251.11	3	STAD,BLCA,KIRC
ENSG00000234817.2.vs.ENSG00000198721.11	2	STAD,HNSC
ENSG00000226696.4.vs.ENSG00000167615.15	5	LIHC,LUAD,HNSC,KIRP,BRCA
ENSG00000138867.15.vs.ENSG00000100028.10	1	LUAD
ENSG00000142687.16.vs.ENSG00000020129.14	2	STAD,BRCA
ENSG00000165269.11.vs.ENSG00000223678.1	1	BLCA
ENSG00000034693.13.vs.ENSG00000189007.14	1	LIHC
ENSG00000273820.1.vs.ENSG00000234390.4	1	COAD
ENSG00000119906.10.vs.ENSG00000272572.1	2	BRCA,UCEC
ENSG00000108774.13.vs.ENSG00000267658.1	2	KIRC,BRCA
ENSG00000259353.1.vs.ENSG00000157450.14	1	BRCA
ENSG00000265136.1.vs.ENSG00000262652.1	1	STAD
ENSG00000253194.1.vs.ENSG00000111877.16	1	LIHC
ENSG00000151150.19.vs.ENSG00000254271.1	1	LUAD
ENSG00000084073.7.vs.ENSG00000259943.1	1	BRCA
ENSG00000172469.13.vs.ENSG00000261366.1	1	LIHC
ENSG00000272196.2.vs.ENSG00000203819.6	1	STAD
ENSG00000141497.12.vs.ENSG00000161921.13	3	LIHC,COAD,HNSC
ENSG00000177757.2.vs.ENSG00000230092.6	1	HNSC
ENSG00000235214.1.vs.ENSG00000242372.5	2	PRAD,BRCA
ENSG00000125945.13.vs.ENSG00000249087.5	2	LIHC,BRCA
ENSG00000204370.7.vs.ENSG00000150779.10	2	LUAD,LUSC
ENSG00000143543.13.vs.ENSG00000272654.1	2	LUAD,LUSC
ENSG00000268266.1.vs.ENSG00000268163.1	1	THCA
ENSG00000123119.10.vs.ENSG00000180694.12	1	BRCA
ENSG00000277539.1.vs.ENSG00000244203.2	1	STAD
ENSG00000065675.13.vs.ENSG00000237943.5	3	LIHC,LUSC,HNSC
ENSG00000007255.9.vs.ENSG00000189114.6	3	STAD,PRAD,BRCA
ENSG00000115484.13.vs.ENSG00000173163.9	1	LIHC
ENSG00000170909.12.vs.ENSG00000170906.14	1	LUAD
ENSG00000250568.1.vs.ENSG00000231707.4	2	LUAD,COAD
ENSG00000229782.1.vs.ENSG00000183018.7	3	LIHC,STAD,BLCA
ENSG00000224592.4.vs.ENSG00000185668.6	2	STAD,THCA
ENSG00000223760.4.vs.ENSG00000196604.10	3	STAD,LUSC,BLCA
ENSG00000139194.6.vs.ENSG00000139182.12	2	STAD,KIRC
ENSG00000259205.2.vs.ENSG00000259540.1	1	LUSC
ENSG00000105696.7.vs.ENSG00000006016.9	6	LIHC,STAD,PRAD,BLCA,HNSC,THCA
ENSG00000204856.10.vs.ENSG00000111231.7	2	LIHC,BLCA
ENSG00000108443.12.vs.ENSG00000108423.13	2	STAD,BRCA
ENSG00000145604.14.vs.ENSG00000164187.6	2	COAD,BRCA
ENSG00000235949.1.vs.ENSG00000162989.4	2	STAD,BRCA
ENSG00000163239.11.vs.ENSG00000169291.8	3	LUSC,PRAD,KIRP
ENSG00000169758.11.vs.ENSG00000169752.15	2	STAD,COAD
ENSG00000164109.12.vs.ENSG00000250938.4	1	KIRP
ENSG00000049167.12.vs.ENSG00000164182.9	3	STAD,HNSC,BRCA
ENSG00000279884.1.vs.ENSG00000236449.1	1	STAD
ENSG00000156500.13.vs.ENSG00000156504.15	3	PRAD,BLCA,HNSC
ENSG00000177752.13.vs.ENSG00000151806.12	1	KIRC
ENSG00000240063.1.vs.ENSG00000058063.14	1	STAD
ENSG00000171488.13.vs.ENSG00000231999.5	1	PRAD
ENSG00000175324.8.vs.ENSG00000156735.9	1	LUAD
ENSG00000187778.12.vs.ENSG00000110844.12	1	COAD
ENSG00000271474.1.vs.ENSG00000182168.13	4	PRAD,HNSC,KIRP,THCA
ENSG00000168556.6.vs.ENSG00000232648.3	1	LUSC
ENSG00000206341.7.vs.ENSG00000230521.1	2	LIHC,LUSC
ENSG00000236287.6.vs.ENSG00000247271.5	4	STAD,LUSC,KIRC,THCA
ENSG00000245685.5.vs.ENSG00000109536.10	1	LUSC
ENSG00000270761.1.vs.ENSG00000198087.7	1	BRCA
ENSG00000185065.6.vs.ENSG00000242259.7	1	LUAD
ENSG00000171204.11.vs.ENSG00000150672.15	1	KIRC
ENSG00000253653.1.vs.ENSG00000055163.17	2	LIHC,THCA
ENSG00000122432.15.vs.ENSG00000174021.9	1	LIHC
ENSG00000231437.3.vs.ENSG00000171385.8	2	PRAD,KIRP
ENSG00000109111.13.vs.ENSG00000132581.8	3	BLCA,COAD,BRCA
ENSG00000250959.2.vs.ENSG00000242338.5	2	LIHC,BRCA
ENSG00000189362.10.vs.ENSG00000233654.1	1	LUAD
ENSG00000257122.4.vs.ENSG00000237296.8	1	BRCA
ENSG00000266010.1.vs.ENSG00000141448.7	4	STAD,LUAD,COAD,UCEC
ENSG00000261737.1.vs.ENSG00000097033.13	3	STAD,PRAD,COAD
ENSG00000149806.9.vs.ENSG00000149792.7	4	LUAD,LUSC,KIRP,THCA
ENSG00000248898.1.vs.ENSG00000152684.10	2	STAD,BLCA
ENSG00000272695.1.vs.ENSG00000183087.13	3	STAD,PRAD,HNSC
ENSG00000251405.2.vs.ENSG00000172548.13	1	COAD
ENSG00000132661.3.vs.ENSG00000234832.1	1	COAD
ENSG00000196235.12.vs.ENSG00000105193.7	2	LUAD,BRCA
ENSG00000161011.18.vs.ENSG00000161013.15	1	STAD
ENSG00000152061.20.vs.ENSG00000227373.4	1	HNSC
ENSG00000152763.15.vs.ENSG00000198160.13	2	KIRC,BRCA
ENSG00000123240.15.vs.ENSG00000151468.10	1	LIHC
ENSG00000261572.1.vs.ENSG00000170293.7	3	STAD,LUAD,THCA
ENSG00000161040.15.vs.ENSG00000170632.12	3	LUAD,COAD,UCEC
ENSG00000116747.11.vs.ENSG00000116750.12	1	LUSC
ENSG00000081870.10.vs.ENSG00000116212.13	3	PRAD,COAD,THCA
ENSG00000115525.15.vs.ENSG00000232504.4	3	STAD,BLCA,THCA
ENSG00000110921.10.vs.ENSG00000139428.10	2	LUSC,KIRC
ENSG00000171311.11.vs.ENSG00000171307.17	3	LUAD,BLCA,UCEC
ENSG00000073803.12.vs.ENSG00000113790.9	1	KIRC
ENSG00000058272.14.vs.ENSG00000257557.2	1	STAD
ENSG00000177938.4.vs.ENSG00000139151.13	1	STAD
ENSG00000185869.12.vs.ENSG00000198453.11	3	STAD,HNSC,BRCA
ENSG00000095321.15.vs.ENSG00000119383.18	3	LIHC,STAD,BRCA
ENSG00000121621.6.vs.ENSG00000169519.18	2	BLCA,COAD
ENSG00000102547.17.vs.ENSG00000136169.15	2	KIRC,BRCA
ENSG00000132376.18.vs.ENSG00000236618.2	4	STAD,LUAD,PRAD,COAD
ENSG00000164199.14.vs.ENSG00000176018.11	1	LUAD
ENSG00000134748.12.vs.ENSG00000085840.11	1	KIRC
ENSG00000213513.3.vs.ENSG00000228748.2	1	LIHC
ENSG00000100345.19.vs.ENSG00000223695.1	3	STAD,LUSC,KIRP
ENSG00000227640.2.vs.ENSG00000125285.5	4	STAD,COAD,BRCA,THCA
ENSG00000120370.11.vs.ENSG00000231407.4	1	LUAD
ENSG00000171453.16.vs.ENSG00000204052.4	2	LUSC,UCEC
ENSG00000255073.7.vs.ENSG00000110031.11	1	HNSC
ENSG00000225180.5.vs.ENSG00000181409.10	1	STAD
ENSG00000145012.11.vs.ENSG00000270959.1	2	HNSC,KIRC
ENSG00000272323.1.vs.ENSG00000205838.11	3	LIHC,LUAD,BRCA
ENSG00000161298.15.vs.ENSG00000186020.11	3	LUAD,KIRC,BRCA
ENSG00000114779.18.vs.ENSG00000243989.6	4	STAD,LUAD,LUSC,HNSC
ENSG00000270673.1.vs.ENSG00000185728.15	2	LUAD,BRCA
ENSG00000213619.8.vs.ENSG00000149187.16	2	LUSC,HNSC
ENSG00000170876.7.vs.ENSG00000163528.11	1	HNSC
ENSG00000187135.7.vs.ENSG00000264515.4	1	STAD
ENSG00000164713.8.vs.ENSG00000205356.8	1	LUAD
ENSG00000240520.4.vs.ENSG00000137976.7	2	PRAD,THCA
ENSG00000267302.4.vs.ENSG00000189050.13	1	BRCA
ENSG00000257252.4.vs.ENSG00000173598.12	1	STAD
ENSG00000241549.7.vs.ENSG00000224843.5	2	LIHC,STAD
ENSG00000227959.1.vs.ENSG00000142627.12	3	LUAD,HNSC,THCA
ENSG00000180071.17.vs.ENSG00000204860.4	1	COAD
ENSG00000118855.17.vs.ENSG00000118849.8	2	BLCA,HNSC
ENSG00000106245.8.vs.ENSG00000106244.11	3	STAD,LUAD,HNSC
ENSG00000168517.9.vs.ENSG00000224505.2	1	KIRP
ENSG00000164129.10.vs.ENSG00000164128.5	1	KIRC
ENSG00000253408.4.vs.ENSG00000104365.12	1	PRAD
ENSG00000256673.1.vs.ENSG00000278635.1	2	LIHC,STAD
ENSG00000008382.14.vs.ENSG00000178078.10	3	LIHC,STAD,LUAD
ENSG00000178700.6.vs.ENSG00000178694.8	1	KIRC
ENSG00000073331.16.vs.ENSG00000145365.10	1	KIRP
ENSG00000150401.13.vs.ENSG00000150403.16	3	LUSC,COAD,BRCA
ENSG00000139718.9.vs.ENSG00000139725.6	1	KIRC
ENSG00000271122.1.vs.ENSG00000122557.8	3	LIHC,COAD,HNSC
ENSG00000225936.1.vs.ENSG00000165646.10	1	BRCA
ENSG00000166823.5.vs.ENSG00000259441.2	1	PRAD
ENSG00000272086.1.vs.ENSG00000113384.12	1	COAD
ENSG00000153922.9.vs.ENSG00000248489.1	3	STAD,LUAD,BRCA
ENSG00000105982.15.vs.ENSG00000182648.10	1	KIRC
ENSG00000273084.1.vs.ENSG00000234432.4	6	STAD,PRAD,COAD,HNSC,KIRP,UCEC
ENSG00000121486.10.vs.ENSG00000116668.11	1	BLCA
ENSG00000158092.5.vs.ENSG00000239213.4	2	KIRC,KIRP
ENSG00000278238.1.vs.ENSG00000136108.13	1	COAD
ENSG00000226200.5.vs.ENSG00000198964.12	1	LIHC
ENSG00000163959.8.vs.ENSG00000163958.12	1	BLCA
ENSG00000258384.1.vs.ENSG00000166965.11	1	BRCA
ENSG00000214013.8.vs.ENSG00000103978.14	2	KIRC,BRCA
ENSG00000174804.3.vs.ENSG00000246523.6	2	LIHC,PRAD
ENSG00000125457.12.vs.ENSG00000263843.1	3	LIHC,COAD,UCEC
ENSG00000125352.5.vs.ENSG00000125356.6	1	HNSC
ENSG00000005812.9.vs.ENSG00000274898.1	1	BRCA
ENSG00000067369.12.vs.ENSG00000166963.11	1	COAD
ENSG00000178531.5.vs.ENSG00000269139.2	3	BLCA,KIRP,THCA
ENSG00000233621.1.vs.ENSG00000163874.8	3	COAD,HNSC,BRCA
ENSG00000064225.11.vs.ENSG00000239445.4	1	STAD
ENSG00000137210.12.vs.ENSG00000272097.1	1	COAD
ENSG00000147383.9.vs.ENSG00000147400.8	2	STAD,HNSC
ENSG00000152942.17.vs.ENSG00000085231.12	1	LUAD
ENSG00000160460.14.vs.ENSG00000090013.8	2	LUAD,UCEC
ENSG00000001629.8.vs.ENSG00000001631.13	2	LUAD,COAD
ENSG00000260526.1.vs.ENSG00000138660.10	2	COAD,THCA
ENSG00000271797.1.vs.ENSG00000164219.8	1	BRCA
ENSG00000174177.11.vs.ENSG00000158717.9	2	COAD,BRCA
ENSG00000279873.2.vs.ENSG00000152518.6	1	COAD
ENSG00000260136.4.vs.ENSG00000168434.11	1	BRCA
ENSG00000064419.12.vs.ENSG00000230359.4	2	LUAD,THCA
ENSG00000183207.11.vs.ENSG00000104812.13	1	BRCA
ENSG00000167182.12.vs.ENSG00000264920.1	1	LIHC
ENSG00000213380.12.vs.ENSG00000132603.12	5	LIHC,STAD,LUAD,HNSC,KIRP
ENSG00000108107.11.vs.ENSG00000233493.3	1	KIRP
ENSG00000112530.10.vs.ENSG00000185345.17	1	KIRP
ENSG00000196505.9.vs.ENSG00000065183.14	1	LUAD
ENSG00000126107.13.vs.ENSG00000126088.11	1	BRCA
ENSG00000136758.17.vs.ENSG00000120539.13	1	PRAD
ENSG00000090581.8.vs.ENSG00000007520.3	1	UCEC
ENSG00000137502.8.vs.ENSG00000246067.6	1	HNSC
ENSG00000116883.8.vs.ENSG00000142694.6	2	LUSC,BRCA
ENSG00000137996.11.vs.ENSG00000224616.1	2	LUSC,HNSC
ENSG00000249641.2.vs.ENSG00000123364.4	2	LUAD,LUSC
ENSG00000254854.1.vs.ENSG00000110400.9	1	LUSC
ENSG00000261079.1.vs.ENSG00000214331.7	1	COAD
ENSG00000233926.1.vs.ENSG00000196781.12	3	LIHC,BLCA,BRCA
ENSG00000077348.7.vs.ENSG00000248098.9	2	KIRP,BRCA
ENSG00000182405.5.vs.ENSG00000134153.8	1	LIHC
ENSG00000122390.16.vs.ENSG00000167981.5	2	KIRP,BRCA
ENSG00000273619.1.vs.ENSG00000171858.16	2	COAD,KIRC
ENSG00000187391.16.vs.ENSG00000234456.6	2	STAD,HNSC
ENSG00000080824.17.vs.ENSG00000140153.16	2	KIRP,BRCA
ENSG00000160888.6.vs.ENSG00000104915.13	1	LUAD
ENSG00000100121.11.vs.ENSG00000183169.6	1	THCA
ENSG00000101745.14.vs.ENSG00000266053.2	1	BLCA
ENSG00000270919.1.vs.ENSG00000266542.1	1	STAD
ENSG00000271918.1.vs.ENSG00000145781.7	2	HNSC,UCEC
ENSG00000185278.13.vs.ENSG00000234741.6	1	LUSC
ENSG00000151657.10.vs.ENSG00000165629.18	2	STAD,HNSC
ENSG00000139631.17.vs.ENSG00000139651.10	1	BLCA
ENSG00000268516.2.vs.ENSG00000278129.1	4	LIHC,LUAD,KIRC,BRCA
ENSG00000264235.4.vs.ENSG00000118680.11	1	COAD
ENSG00000250343.1.vs.ENSG00000169302.13	2	KIRP,THCA
ENSG00000267420.1.vs.ENSG00000267166.4	1	KIRC
ENSG00000228737.2.vs.ENSG00000131504.14	1	KIRC
ENSG00000136305.10.vs.ENSG00000213903.7	2	COAD,BRCA
ENSG00000168621.13.vs.ENSG00000248587.5	3	HNSC,KIRP,BRCA
ENSG00000177410.11.vs.ENSG00000124201.13	1	LIHC
ENSG00000259319.1.vs.ENSG00000140044.11	1	THCA
ENSG00000262681.2.vs.ENSG00000180638.16	2	LUAD,THCA
ENSG00000258285.1.vs.ENSG00000088992.16	2	COAD,KIRP
ENSG00000228237.4.vs.ENSG00000123472.11	1	STAD
ENSG00000255050.1.vs.ENSG00000204839.7	2	PRAD,KIRC
ENSG00000214654.6.vs.ENSG00000119402.15	1	HNSC
ENSG00000278847.1.vs.ENSG00000067646.10	1	PRAD
ENSG00000145331.12.vs.ENSG00000138823.11	2	PRAD,BRCA
ENSG00000135298.12.vs.ENSG00000230910.2	2	LUSC,PRAD
ENSG00000246640.1.vs.ENSG00000005884.16	1	KIRP
ENSG00000260916.4.vs.ENSG00000261652.2	3	PRAD,KIRC,KIRP
ENSG00000050327.13.vs.ENSG00000244479.5	1	STAD
ENSG00000240225.9.vs.ENSG00000131848.8	2	STAD,KIRP
ENSG00000092020.9.vs.ENSG00000100890.14	2	LUSC,BRCA
ENSG00000279613.1.vs.ENSG00000141580.14	2	STAD,KIRP
ENSG00000176635.16.vs.ENSG00000227117.5	1	STAD
ENSG00000184465.14.vs.ENSG00000185127.6	1	LIHC
ENSG00000156831.6.vs.ENSG00000164961.14	3	LIHC,LUAD,COAD
ENSG00000268066.4.vs.ENSG00000102081.12	1	STAD
ENSG00000124635.8.vs.ENSG00000196787.3	2	LUSC,BRCA
ENSG00000099256.17.vs.ENSG00000273107.1	3	LUSC,BRCA,THCA
ENSG00000204622.9.vs.ENSG00000237669.1	1	LUAD
ENSG00000196860.6.vs.ENSG00000258658.1	1	COAD
ENSG00000116874.10.vs.ENSG00000231365.4	2	LIHC,KIRP
ENSG00000132394.9.vs.ENSG00000175792.10	2	HNSC,KIRC
ENSG00000130023.14.vs.ENSG00000184786.5	1	LIHC
ENSG00000164172.17.vs.ENSG00000247796.2	1	HNSC
ENSG00000177302.13.vs.ENSG00000176994.10	3	STAD,COAD,HNSC
ENSG00000223959.7.vs.ENSG00000177946.5	1	PRAD
ENSG00000159239.10.vs.ENSG00000005448.15	6	LIHC,BLCA,HNSC,KIRC,KIRP,BRCA
ENSG00000106397.10.vs.ENSG00000106400.10	2	STAD,KIRC
ENSG00000280132.1.vs.ENSG00000140682.17	4	LIHC,COAD,HNSC,BRCA
ENSG00000182871.13.vs.ENSG00000273796.1	1	THCA
ENSG00000157343.7.vs.ENSG00000232909.1	1	LUAD
ENSG00000154237.11.vs.ENSG00000259583.2	2	LIHC,STAD
ENSG00000128408.8.vs.ENSG00000077935.15	1	LUAD
ENSG00000145782.11.vs.ENSG00000177879.13	2	STAD,LUAD
ENSG00000226377.1.vs.ENSG00000176658.15	2	BLCA,COAD
ENSG00000166793.9.vs.ENSG00000172409.5	1	BRCA
ENSG00000151532.12.vs.ENSG00000023041.10	2	STAD,UCEC
ENSG00000156467.8.vs.ENSG00000254224.1	1	LIHC
ENSG00000227354.5.vs.ENSG00000139746.14	2	LUSC,BRCA
ENSG00000148303.15.vs.ENSG00000148297.14	2	LUSC,HNSC
ENSG00000130749.8.vs.ENSG00000142230.10	2	LUSC,BRCA
ENSG00000107938.16.vs.ENSG00000224023.9	1	UCEC
ENSG00000213963.5.vs.ENSG00000018510.11	1	LUAD
ENSG00000271387.1.vs.ENSG00000116667.11	1	PRAD
ENSG00000267002.1.vs.ENSG00000188554.12	1	BRCA
ENSG00000128512.18.vs.ENSG00000198839.8	3	STAD,LUSC,KIRP
ENSG00000254670.1.vs.ENSG00000189431.7	3	LUAD,LUSC,PRAD
ENSG00000160959.6.vs.ENSG00000160957.11	4	LUAD,LUSC,PRAD,KIRC
ENSG00000226279.2.vs.ENSG00000226329.2	1	LUSC
ENSG00000104375.14.vs.ENSG00000271930.1	1	LUAD
ENSG00000085365.16.vs.ENSG00000245556.2	1	BRCA
ENSG00000157470.10.vs.ENSG00000157483.7	3	STAD,KIRC,UCEC
ENSG00000066230.9.vs.ENSG00000250385.1	1	KIRP
ENSG00000130313.5.vs.ENSG00000269439.4	1	LUSC
ENSG00000186063.11.vs.ENSG00000162819.10	3	STAD,LUSC,BLCA
ENSG00000111247.13.vs.ENSG00000047621.10	1	BRCA
ENSG00000272047.1.vs.ENSG00000122335.12	2	LIHC,STAD
ENSG00000205583.12.vs.ENSG00000278416.1	1	LUSC
ENSG00000234636.2.vs.ENSG00000180182.9	3	BLCA,COAD,HNSC
ENSG00000140254.11.vs.ENSG00000137857.16	4	LIHC,STAD,PRAD,THCA
ENSG00000156050.7.vs.ENSG00000119723.14	1	STAD
ENSG00000249421.1.vs.ENSG00000145808.7	1	BLCA
ENSG00000188243.11.vs.ENSG00000118939.16	1	BRCA
ENSG00000100938.16.vs.ENSG00000129559.11	1	BRCA
ENSG00000077514.7.vs.ENSG00000175536.6	2	COAD,HNSC
ENSG00000196236.11.vs.ENSG00000100380.11	3	LUAD,BRCA,UCEC
ENSG00000176165.9.vs.ENSG00000257126.4	1	BLCA
ENSG00000276900.1.vs.ENSG00000151743.9	1	STAD
ENSG00000197375.11.vs.ENSG00000233006.5	1	LUAD
ENSG00000102786.13.vs.ENSG00000224892.5	3	LIHC,LUSC,PRAD
ENSG00000185686.16.vs.ENSG00000220891.1	2	STAD,BLCA
ENSG00000186862.16.vs.ENSG00000107819.12	3	STAD,BLCA,HNSC
ENSG00000267278.4.vs.ENSG00000233483.2	2	BLCA,KIRP
ENSG00000112078.12.vs.ENSG00000179165.10	1	BRCA
ENSG00000180423.4.vs.ENSG00000175224.15	4	LUAD,LUSC,BLCA,HNSC
ENSG00000132849.17.vs.ENSG00000271200.1	1	THCA
ENSG00000225850.3.vs.ENSG00000181274.6	1	UCEC
ENSG00000183011.12.vs.ENSG00000170004.15	4	STAD,HNSC,BRCA,THCA
ENSG00000120820.11.vs.ENSG00000111727.10	1	PRAD
ENSG00000103326.9.vs.ENSG00000277142.1	3	PRAD,HNSC,UCEC
ENSG00000213341.9.vs.ENSG00000227492.1	1	UCEC
ENSG00000135205.13.vs.ENSG00000214439.3	1	LUAD
ENSG00000185453.11.vs.ENSG00000105486.12	1	BRCA
ENSG00000132763.13.vs.ENSG00000280670.1	1	STAD
ENSG00000125375.13.vs.ENSG00000087299.10	2	COAD,BRCA
ENSG00000178307.8.vs.ENSG00000235530.5	1	COAD
ENSG00000175283.7.vs.ENSG00000095319.13	4	LIHC,LUSC,BLCA,COAD
ENSG00000120265.15.vs.ENSG00000120253.12	3	LIHC,LUAD,HNSC
ENSG00000146233.6.vs.ENSG00000153291.14	3	LUAD,LUSC,BRCA
ENSG00000105835.10.vs.ENSG00000273320.1	1	LUSC
ENSG00000250072.4.vs.ENSG00000169247.10	1	COAD
ENSG00000254501.1.vs.ENSG00000149809.13	2	LUSC,THCA
ENSG00000189227.5.vs.ENSG00000259673.4	1	BRCA
ENSG00000106803.8.vs.ENSG00000119523.9	4	LIHC,HNSC,KIRP,UCEC
ENSG00000279685.2.vs.ENSG00000264589.1	1	KIRC
ENSG00000139352.3.vs.ENSG00000171759.7	2	LIHC,BLCA
ENSG00000157916.17.vs.ENSG00000116151.12	1	HNSC
ENSG00000272870.1.vs.ENSG00000164105.3	3	PRAD,COAD,KIRP
ENSG00000225057.2.vs.ENSG00000186235.9	1	STAD
ENSG00000260634.1.vs.ENSG00000260163.1	1	KIRC
ENSG00000180818.4.vs.ENSG00000251151.2	1	UCEC
ENSG00000236939.2.vs.ENSG00000164929.15	1	THCA
ENSG00000274015.1.vs.ENSG00000140006.10	1	BRCA
ENSG00000131143.7.vs.ENSG00000131148.7	3	LIHC,LUSC,PRAD
ENSG00000215193.11.vs.ENSG00000225335.3	4	LIHC,STAD,LUAD,BRCA
ENSG00000056736.8.vs.ENSG00000016391.9	2	LIHC,KIRP
ENSG00000016082.13.vs.ENSG00000259663.2	1	STAD
ENSG00000100211.9.vs.ENSG00000184949.14	2	HNSC,UCEC
ENSG00000145063.13.vs.ENSG00000150873.10	1	HNSC
ENSG00000159082.16.vs.ENSG00000238197.4	2	LUSC,BRCA
ENSG00000260456.5.vs.ENSG00000270006.2	1	COAD
ENSG00000084623.10.vs.ENSG00000160055.18	1	LIHC
ENSG00000107371.11.vs.ENSG00000122741.14	1	KIRC
ENSG00000153767.8.vs.ENSG00000144840.7	2	PRAD,KIRC
ENSG00000263013.1.vs.ENSG00000262222.1	4	LIHC,LUSC,HNSC,THCA
ENSG00000122218.13.vs.ENSG00000162736.14	6	LIHC,STAD,LUAD,LUSC,PRAD,BRCA
ENSG00000111412.5.vs.ENSG00000135119.13	4	LUAD,COAD,KIRC,KIRP
ENSG00000174016.10.vs.ENSG00000278530.3	3	STAD,PRAD,BRCA
ENSG00000279791.1.vs.ENSG00000144199.10	2	STAD,PRAD
ENSG00000270604.4.vs.ENSG00000204599.13	1	LUSC
ENSG00000149187.16.vs.ENSG00000110536.12	3	LUSC,HNSC,THCA
ENSG00000101493.9.vs.ENSG00000275763.2	2	STAD,THCA
ENSG00000156110.12.vs.ENSG00000185009.11	3	LUAD,PRAD,BRCA
ENSG00000129055.11.vs.ENSG00000182923.15	1	KIRC
ENSG00000256806.3.vs.ENSG00000108590.9	4	STAD,PRAD,COAD,UCEC
ENSG00000120658.11.vs.ENSG00000270522.1	1	PRAD
ENSG00000273345.4.vs.ENSG00000119048.6	2	LUAD,PRAD
ENSG00000175866.14.vs.ENSG00000226137.5	1	BLCA
ENSG00000148814.16.vs.ENSG00000165752.15	3	STAD,LUAD,KIRP
ENSG00000148229.11.vs.ENSG00000157653.10	3	LIHC,LUSC,PRAD
ENSG00000221978.10.vs.ENSG00000224870.5	2	LIHC,STAD
ENSG00000129514.5.vs.ENSG00000139865.15	4	LIHC,STAD,BRCA,UCEC
ENSG00000238058.1.vs.ENSG00000130559.17	1	HNSC
ENSG00000160194.16.vs.ENSG00000160193.10	1	LUSC
ENSG00000176714.9.vs.ENSG00000198522.12	2	LIHC,KIRP
ENSG00000215866.6.vs.ENSG00000224167.1	3	LIHC,LUAD,BLCA
ENSG00000134247.9.vs.ENSG00000272715.1	1	THCA
ENSG00000104946.9.vs.ENSG00000039650.8	1	LIHC
ENSG00000164118.11.vs.ENSG00000164117.11	1	BRCA
ENSG00000258388.6.vs.ENSG00000204314.9	2	STAD,THCA
ENSG00000238078.1.vs.ENSG00000272823.1	1	PRAD
ENSG00000174842.15.vs.ENSG00000122484.8	1	BRCA
ENSG00000250959.2.vs.ENSG00000271816.1	1	LUSC
ENSG00000101844.16.vs.ENSG00000101843.17	4	LUAD,BLCA,HNSC,BRCA
ENSG00000186174.11.vs.ENSG00000110375.2	3	KIRP,BRCA,THCA
ENSG00000276408.1.vs.ENSG00000205084.9	3	COAD,KIRP,THCA
ENSG00000237594.2.vs.ENSG00000156299.11	1	STAD
ENSG00000270495.1.vs.ENSG00000250453.1	1	BLCA
ENSG00000131067.15.vs.ENSG00000131069.18	1	BRCA
ENSG00000237765.5.vs.ENSG00000118564.13	1	PRAD
ENSG00000009830.10.vs.ENSG00000100577.17	1	BRCA
ENSG00000276649.1.vs.ENSG00000198053.10	2	STAD,UCEC
ENSG00000140987.18.vs.ENSG00000103343.11	1	LUAD
ENSG00000259495.2.vs.ENSG00000172379.17	3	LIHC,PRAD,KIRP
ENSG00000166037.9.vs.ENSG00000077458.11	1	COAD
ENSG00000205208.4.vs.ENSG00000171503.10	1	BRCA
ENSG00000166349.8.vs.ENSG00000175104.13	1	BLCA
ENSG00000184967.5.vs.ENSG00000185163.8	2	LIHC,KIRP
ENSG00000166246.12.vs.ENSG00000168096.13	2	HNSC,KIRC
ENSG00000138629.14.vs.ENSG00000247240.6	2	LIHC,BRCA
ENSG00000267774.2.vs.ENSG00000183287.12	5	STAD,LUSC,PRAD,BLCA,KIRC
ENSG00000235192.1.vs.ENSG00000115339.12	4	LUSC,KIRP,THCA,UCEC
ENSG00000186376.13.vs.ENSG00000173275.11	3	STAD,BLCA,HNSC
ENSG00000103852.11.vs.ENSG00000168904.13	2	KIRC,BRCA
ENSG00000260719.1.vs.ENSG00000185905.3	2	PRAD,COAD
ENSG00000184897.5.vs.ENSG00000206417.7	3	LIHC,STAD,PRAD
ENSG00000140836.13.vs.ENSG00000272250.1	1	STAD
ENSG00000034533.10.vs.ENSG00000114670.12	2	HNSC,KIRC
ENSG00000119636.14.vs.ENSG00000187097.11	1	KIRP
ENSG00000272853.1.vs.ENSG00000152455.14	1	COAD
ENSG00000188316.12.vs.ENSG00000225302.2	2	LUAD,BRCA
ENSG00000181090.16.vs.ENSG00000203993.4	4	LIHC,HNSC,KIRC,BRCA
ENSG00000213918.9.vs.ENSG00000188827.9	2	LIHC,UCEC
ENSG00000101457.11.vs.ENSG00000124116.17	2	STAD,BRCA
ENSG00000267128.1.vs.ENSG00000129654.7	1	HNSC
ENSG00000163728.9.vs.ENSG00000239774.1	1	KIRC
ENSG00000188322.4.vs.ENSG00000246465.1	2	BLCA,COAD
ENSG00000277369.1.vs.ENSG00000122299.10	1	UCEC
ENSG00000235010.1.vs.ENSG00000151640.11	1	BRCA
ENSG00000250654.6.vs.ENSG00000249388.1	2	STAD,LUSC
ENSG00000143643.11.vs.ENSG00000173409.12	5	LIHC,LUAD,LUSC,HNSC,UCEC
ENSG00000278266.1.vs.ENSG00000256001.1	2	LIHC,HNSC
ENSG00000118007.11.vs.ENSG00000261758.1	1	KIRC
ENSG00000260929.1.vs.ENSG00000083799.16	2	LUSC,COAD
ENSG00000071894.13.vs.ENSG00000272115.1	2	LUSC,BRCA
ENSG00000185986.11.vs.ENSG00000271119.1	2	STAD,LUSC
ENSG00000119537.14.vs.ENSG00000267390.1	2	BLCA,KIRP
ENSG00000249267.5.vs.ENSG00000256276.1	1	LUSC
ENSG00000138075.10.vs.ENSG00000143921.6	2	HNSC,KIRP
ENSG00000104825.15.vs.ENSG00000068903.18	3	LIHC,LUAD,BRCA
ENSG00000119321.7.vs.ENSG00000136868.10	4	LIHC,LUAD,HNSC,BRCA
ENSG00000101182.13.vs.ENSG00000184402.13	2	LUAD,BRCA
ENSG00000142444.6.vs.ENSG00000130733.9	3	LUSC,KIRC,THCA
ENSG00000164405.9.vs.ENSG00000164404.7	1	BRCA
ENSG00000254409.1.vs.ENSG00000244926.5	2	HNSC,BRCA
ENSG00000126453.8.vs.ENSG00000126456.14	4	LIHC,LUAD,KIRC,BRCA
ENSG00000218690.1.vs.ENSG00000278588.1	1	LUSC
ENSG00000188997.6.vs.ENSG00000118369.11	2	COAD,KIRP
ENSG00000137076.17.vs.ENSG00000107175.9	3	LIHC,LUSC,BRCA
ENSG00000225973.3.vs.ENSG00000069943.8	1	BRCA
ENSG00000274425.1.vs.ENSG00000161847.12	2	LUSC,COAD
ENSG00000114745.12.vs.ENSG00000168026.15	1	LUSC
ENSG00000224081.6.vs.ENSG00000143036.15	1	LUSC
ENSG00000181027.9.vs.ENSG00000090372.13	2	LIHC,BRCA
ENSG00000119616.10.vs.ENSG00000119682.15	1	BRCA
ENSG00000183597.14.vs.ENSG00000099889.12	1	LUAD
ENSG00000176912.3.vs.ENSG00000176890.14	2	COAD,THCA
ENSG00000166848.5.vs.ENSG00000065427.13	1	STAD
ENSG00000237436.1.vs.ENSG00000171735.17	1	THCA
ENSG00000152520.12.vs.ENSG00000261485.1	1	BRCA
ENSG00000134996.11.vs.ENSG00000106733.19	1	STAD
ENSG00000023318.7.vs.ENSG00000119509.11	3	LIHC,LUSC,HNSC
ENSG00000118655.4.vs.ENSG00000134262.11	1	BRCA
ENSG00000188215.8.vs.ENSG00000102897.8	2	STAD,THCA
ENSG00000168994.12.vs.ENSG00000270504.1	3	LUSC,COAD,UCEC
ENSG00000111711.8.vs.ENSG00000004700.14	3	LUSC,BLCA,KIRC
ENSG00000244268.1.vs.ENSG00000181467.3	1	STAD
ENSG00000279968.1.vs.ENSG00000024862.15	1	LIHC
ENSG00000100813.13.vs.ENSG00000179933.5	2	KIRP,BRCA
ENSG00000168701.17.vs.ENSG00000125122.13	1	PRAD
ENSG00000214796.7.vs.ENSG00000234996.3	3	LUAD,BLCA,UCEC
ENSG00000100578.13.vs.ENSG00000100575.12	1	BRCA
ENSG00000137055.13.vs.ENSG00000096872.14	3	LIHC,HNSC,BRCA
ENSG00000115486.10.vs.ENSG00000118640.9	1	COAD
ENSG00000236144.5.vs.ENSG00000105677.10	2	LUAD,BRCA
ENSG00000162616.8.vs.ENSG00000162613.15	1	BRCA
ENSG00000163812.12.vs.ENSG00000075914.11	4	PRAD,HNSC,KIRC,THCA
ENSG00000261824.5.vs.ENSG00000267575.5	3	STAD,LUSC,UCEC
ENSG00000108395.12.vs.ENSG00000224738.1	2	KIRC,BRCA
ENSG00000073598.5.vs.ENSG00000185379.19	2	KIRC,BRCA
ENSG00000128699.12.vs.ENSG00000064933.15	2	LIHC,LUSC
ENSG00000276855.1.vs.ENSG00000265519.1	3	LIHC,STAD,HNSC
ENSG00000088727.11.vs.ENSG00000114648.10	1	LUSC
ENSG00000267498.1.vs.ENSG00000169021.5	2	BRCA,THCA
ENSG00000227076.1.vs.ENSG00000232259.1	1	BRCA
ENSG00000270133.1.vs.ENSG00000133302.11	2	LUAD,BRCA
ENSG00000137819.12.vs.ENSG00000261634.3	3	LIHC,KIRC,BRCA
ENSG00000197343.9.vs.ENSG00000221909.2	2	LUAD,PRAD
ENSG00000251314.2.vs.ENSG00000118985.13	2	LUSC,PRAD
ENSG00000272894.4.vs.ENSG00000164654.14	1	STAD
ENSG00000163714.16.vs.ENSG00000188582.7	1	STAD
ENSG00000132286.10.vs.ENSG00000132254.11	1	LUSC
ENSG00000177380.12.vs.ENSG00000221916.3	2	BLCA,BRCA
ENSG00000159579.12.vs.ENSG00000172775.15	2	STAD,PRAD
ENSG00000171421.11.vs.ENSG00000145494.10	1	BRCA
ENSG00000271880.1.vs.ENSG00000272734.1	1	UCEC
ENSG00000121851.11.vs.ENSG00000272031.2	1	BRCA
ENSG00000136451.7.vs.ENSG00000280233.1	1	BLCA
ENSG00000267546.2.vs.ENSG00000163597.13	2	KIRP,BRCA
ENSG00000145191.10.vs.ENSG00000272721.4	3	STAD,HNSC,KIRC
ENSG00000125484.10.vs.ENSG00000125485.16	4	STAD,COAD,HNSC,UCEC
ENSG00000131653.11.vs.ENSG00000206630.1	3	LIHC,HNSC,BRCA
ENSG00000237021.2.vs.ENSG00000187189.10	2	BLCA,BRCA
ENSG00000132740.7.vs.ENSG00000197345.11	1	BLCA
ENSG00000112425.12.vs.ENSG00000270638.1	1	PRAD
ENSG00000167978.15.vs.ENSG00000205913.5	2	LIHC,BRCA
ENSG00000158805.10.vs.ENSG00000075399.11	2	LIHC,HNSC
ENSG00000162775.13.vs.ENSG00000227963.1	2	LIHC,HNSC
ENSG00000197279.3.vs.ENSG00000272009.1	2	LUSC,UCEC
ENSG00000227848.1.vs.ENSG00000136143.12	2	LIHC,BRCA
ENSG00000227356.2.vs.ENSG00000155265.9	1	STAD
ENSG00000214113.9.vs.ENSG00000145982.10	1	LIHC
ENSG00000253390.1.vs.ENSG00000197217.11	1	HNSC
ENSG00000223501.7.vs.ENSG00000231500.5	1	LUSC
ENSG00000170892.9.vs.ENSG00000125505.15	2	KIRC,BRCA
ENSG00000176894.8.vs.ENSG00000177084.15	1	KIRC
ENSG00000087258.12.vs.ENSG00000246379.5	1	KIRP
ENSG00000250802.5.vs.ENSG00000132846.5	4	KIRC,KIRP,BRCA,UCEC
ENSG00000116285.11.vs.ENSG00000238290.1	2	LIHC,LUAD
ENSG00000103549.20.vs.ENSG00000196118.10	2	KIRC,THCA
ENSG00000196867.6.vs.ENSG00000267421.5	2	STAD,BRCA
ENSG00000100583.4.vs.ENSG00000100580.7	1	PRAD
ENSG00000267169.1.vs.ENSG00000105011.7	1	COAD
ENSG00000258777.1.vs.ENSG00000100644.15	2	LUAD,HNSC
ENSG00000248131.4.vs.ENSG00000248783.1	1	STAD
ENSG00000196704.10.vs.ENSG00000265100.1	3	KIRC,KIRP,BRCA
ENSG00000243273.1.vs.ENSG00000214237.8	1	BRCA
ENSG00000171097.12.vs.ENSG00000136802.10	3	STAD,BLCA,HNSC
ENSG00000238122.1.vs.ENSG00000241361.7	1	BRCA
ENSG00000073910.18.vs.ENSG00000237637.1	1	BRCA
ENSG00000189144.12.vs.ENSG00000267640.4	2	KIRC,BRCA
ENSG00000101138.10.vs.ENSG00000087586.16	2	LUSC,UCEC
ENSG00000186976.13.vs.ENSG00000261251.1	2	LUAD,HNSC
ENSG00000226308.1.vs.ENSG00000101144.11	2	COAD,KIRP
ENSG00000254231.1.vs.ENSG00000123124.12	4	STAD,LUAD,COAD,BRCA
ENSG00000140740.9.vs.ENSG00000274460.1	3	LUSC,BRCA,UCEC
ENSG00000245975.2.vs.ENSG00000128923.9	2	KIRC,BRCA
ENSG00000183742.11.vs.ENSG00000233834.5	3	PRAD,HNSC,THCA
ENSG00000177854.7.vs.ENSG00000172534.12	2	COAD,HNSC
ENSG00000233871.1.vs.ENSG00000151208.15	1	LUSC
ENSG00000225400.1.vs.ENSG00000232611.1	3	STAD,LUSC,THCA
ENSG00000179195.14.vs.ENSG00000119242.7	1	KIRP
ENSG00000112293.13.vs.ENSG00000112294.11	3	STAD,KIRC,THCA
ENSG00000165655.15.vs.ENSG00000237149.5	2	BLCA,BRCA
ENSG00000267340.1.vs.ENSG00000188554.12	1	KIRP
ENSG00000081087.13.vs.ENSG00000112333.10	3	HNSC,KIRC,KIRP
ENSG00000214087.7.vs.ENSG00000185359.11	1	KIRP
ENSG00000060069.15.vs.ENSG00000178412.4	1	UCEC
ENSG00000064490.12.vs.ENSG00000254901.6	1	LUSC
ENSG00000175550.6.vs.ENSG00000175573.6	3	STAD,LUSC,HNSC
ENSG00000066777.7.vs.ENSG00000271966.1	2	LIHC,LUAD
ENSG00000161618.8.vs.ENSG00000104872.9	3	LUAD,BRCA,THCA
ENSG00000125868.14.vs.ENSG00000125864.10	1	STAD
ENSG00000184489.10.vs.ENSG00000244998.1	1	HNSC
ENSG00000261173.1.vs.ENSG00000069345.10	1	LUSC
ENSG00000261236.4.vs.ENSG00000185122.9	5	STAD,LUAD,LUSC,COAD,UCEC
ENSG00000155876.5.vs.ENSG00000155875.12	1	THCA
ENSG00000076382.15.vs.ENSG00000227543.4	3	LIHC,BRCA,THCA
ENSG00000176532.3.vs.ENSG00000223813.2	3	STAD,LUAD,PRAD
ENSG00000226067.5.vs.ENSG00000281741.1	2	KIRC,KIRP
ENSG00000275709.1.vs.ENSG00000104164.9	1	BRCA
ENSG00000279673.1.vs.ENSG00000154310.15	3	BLCA,COAD,KIRC
ENSG00000234224.2.vs.ENSG00000242593.4	1	LUAD
ENSG00000197417.7.vs.ENSG00000040531.13	2	STAD,COAD
ENSG00000092201.8.vs.ENSG00000260830.1	1	BRCA
ENSG00000006712.13.vs.ENSG00000063322.12	2	LUAD,BRCA
ENSG00000163870.13.vs.ENSG00000073111.12	1	KIRC
ENSG00000265055.1.vs.ENSG00000237854.3	2	LIHC,BRCA
ENSG00000250548.5.vs.ENSG00000232774.6	2	BLCA,HNSC
ENSG00000138650.8.vs.ENSG00000250241.4	4	PRAD,BLCA,KIRC,UCEC
ENSG00000233927.4.vs.ENSG00000267855.4	2	LUSC,COAD
ENSG00000005513.9.vs.ENSG00000260807.5	3	LUAD,KIRP,UCEC
ENSG00000234608.6.vs.ENSG00000089022.12	1	STAD
ENSG00000267277.1.vs.ENSG00000173928.2	1	LUSC
ENSG00000145439.10.vs.ENSG00000251445.1	1	PRAD
ENSG00000104231.9.vs.ENSG00000164695.4	4	STAD,LUAD,LUSC,UCEC
ENSG00000272631.1.vs.ENSG00000107779.10	3	STAD,BLCA,UCEC
ENSG00000106028.9.vs.ENSG00000228775.6	1	LUAD
ENSG00000188626.6.vs.ENSG00000248334.5	2	LIHC,KIRP
ENSG00000013375.14.vs.ENSG00000013392.7	4	LIHC,LUSC,KIRC,THCA
ENSG00000164483.15.vs.ENSG00000164484.10	2	STAD,COAD
ENSG00000262412.1.vs.ENSG00000107897.17	1	COAD
ENSG00000236311.5.vs.ENSG00000107807.11	1	UCEC
ENSG00000104774.11.vs.ENSG00000123154.10	1	LUSC
ENSG00000227199.1.vs.ENSG00000214188.8	2	COAD,KIRC
ENSG00000128641.16.vs.ENSG00000227542.1	1	STAD
ENSG00000219200.9.vs.ENSG00000215067.8	5	LIHC,LUSC,PRAD,COAD,BRCA
ENSG00000129084.16.vs.ENSG00000152270.7	1	STAD
ENSG00000018869.15.vs.ENSG00000267454.4	3	STAD,KIRP,BRCA
ENSG00000134107.4.vs.ENSG00000235831.5	1	LUAD
ENSG00000269834.4.vs.ENSG00000167555.12	2	STAD,HNSC
ENSG00000215908.6.vs.ENSG00000186301.8	3	LIHC,STAD,LUAD
ENSG00000254389.3.vs.ENSG00000158106.11	1	UCEC
ENSG00000103994.15.vs.ENSG00000092531.8	2	LIHC,KIRC
ENSG00000166148.3.vs.ENSG00000279444.1	4	LIHC,PRAD,KIRC,KIRP
ENSG00000100216.5.vs.ENSG00000228274.3	2	LIHC,BRCA
ENSG00000226944.1.vs.ENSG00000158286.11	1	BRCA
ENSG00000054267.19.vs.ENSG00000152904.10	3	LIHC,LUSC,HNSC
ENSG00000169567.10.vs.ENSG00000186687.14	2	STAD,BRCA
ENSG00000204335.3.vs.ENSG00000222033.1	4	STAD,PRAD,COAD,KIRC
ENSG00000125337.15.vs.ENSG00000229921.5	2	STAD,UCEC
ENSG00000083535.14.vs.ENSG00000083520.13	1	LUSC
ENSG00000164162.11.vs.ENSG00000164163.9	1	BRCA
ENSG00000188760.9.vs.ENSG00000123989.12	3	PRAD,BLCA,KIRC
ENSG00000197021.7.vs.ENSG00000235703.4	1	LUAD
ENSG00000134297.6.vs.ENSG00000177119.14	3	STAD,COAD,KIRC
ENSG00000174943.8.vs.ENSG00000247735.2	3	STAD,COAD,HNSC
ENSG00000249637.1.vs.ENSG00000131503.19	3	LUAD,KIRC,BRCA
ENSG00000224051.5.vs.ENSG00000127054.17	1	LIHC
ENSG00000183765.19.vs.ENSG00000100209.8	1	KIRC
ENSG00000237380.5.vs.ENSG00000128652.10	2	LUAD,PRAD
ENSG00000131849.10.vs.ENSG00000269473.1	2	BRCA,THCA
ENSG00000224318.4.vs.ENSG00000134121.8	6	STAD,LUSC,PRAD,HNSC,KIRC,KIRP
ENSG00000116133.10.vs.ENSG00000233203.5	3	STAD,HNSC,THCA
ENSG00000165794.8.vs.ENSG00000258471.1	2	BRCA,UCEC
ENSG00000224687.1.vs.ENSG00000075391.15	4	LUSC,PRAD,HNSC,KIRP
ENSG00000267100.1.vs.ENSG00000129351.16	1	THCA
ENSG00000266904.4.vs.ENSG00000267419.1	3	LUSC,COAD,HNSC
ENSG00000140830.7.vs.ENSG00000140829.10	3	LIHC,PRAD,HNSC
ENSG00000246145.1.vs.ENSG00000179041.3	3	LUAD,COAD,THCA
ENSG00000249896.1.vs.ENSG00000152969.15	1	BRCA
ENSG00000162409.9.vs.ENSG00000162407.8	1	PRAD
ENSG00000205562.2.vs.ENSG00000185070.9	1	BLCA
ENSG00000197153.4.vs.ENSG00000274641.1	1	COAD
ENSG00000224046.1.vs.ENSG00000135164.17	1	KIRC
ENSG00000177225.15.vs.ENSG00000255284.1	2	STAD,BLCA
ENSG00000150776.16.vs.ENSG00000150773.9	2	LIHC,LUAD
ENSG00000166595.10.vs.ENSG00000172831.10	3	STAD,BLCA,COAD
ENSG00000251022.5.vs.ENSG00000168152.11	3	LIHC,STAD,KIRP
ENSG00000223508.5.vs.ENSG00000272812.1	1	PRAD
ENSG00000148334.13.vs.ENSG00000232850.3	4	LIHC,STAD,LUSC,HNSC
ENSG00000226155.1.vs.ENSG00000061938.15	1	KIRP
ENSG00000150938.8.vs.ENSG00000260025.1	3	LIHC,BLCA,BRCA
ENSG00000204410.13.vs.ENSG00000213719.7	1	LUSC
ENSG00000182872.14.vs.ENSG00000147123.10	1	HNSC
ENSG00000247970.2.vs.ENSG00000205476.7	1	PRAD
ENSG00000261318.1.vs.ENSG00000166938.11	1	BRCA
ENSG00000131165.13.vs.ENSG00000167523.12	4	STAD,PRAD,BLCA,KIRC
ENSG00000135540.10.vs.ENSG00000225177.4	1	THCA
ENSG00000089053.11.vs.ENSG00000170633.15	1	LIHC
ENSG00000226191.3.vs.ENSG00000196071.3	1	BRCA
ENSG00000231106.2.vs.ENSG00000159216.17	1	BRCA
ENSG00000279689.1.vs.ENSG00000196968.9	2	HNSC,KIRP
ENSG00000253848.1.vs.ENSG00000183808.10	1	LUAD
ENSG00000099910.15.vs.ENSG00000099917.16	1	KIRC
ENSG00000091164.11.vs.ENSG00000091157.12	1	PRAD
ENSG00000150753.10.vs.ENSG00000150756.12	1	LUSC
ENSG00000280303.2.vs.ENSG00000123908.10	1	COAD
ENSG00000133124.11.vs.ENSG00000237863.2	1	BRCA
ENSG00000255399.3.vs.ENSG00000089225.18	3	BLCA,HNSC,THCA
ENSG00000113712.15.vs.ENSG00000183111.10	3	LIHC,COAD,HNSC
ENSG00000227398.3.vs.ENSG00000181555.18	2	STAD,BRCA
ENSG00000164074.13.vs.ENSG00000164073.8	1	COAD
ENSG00000140694.15.vs.ENSG00000103429.9	3	STAD,BLCA,BRCA
ENSG00000179066.7.vs.ENSG00000227392.1	2	LIHC,BRCA
ENSG00000186017.13.vs.ENSG00000267309.1	2	BRCA,THCA
ENSG00000252481.1.vs.ENSG00000182512.4	2	LUAD,BRCA
ENSG00000232519.2.vs.ENSG00000125459.13	2	LIHC,LUSC
ENSG00000110768.10.vs.ENSG00000110756.16	2	STAD,HNSC
ENSG00000272269.1.vs.ENSG00000124789.10	1	BRCA
ENSG00000175773.11.vs.ENSG00000196323.10	2	LUAD,THCA
ENSG00000215712.9.vs.ENSG00000271040.1	2	LUSC,KIRC
ENSG00000183617.4.vs.ENSG00000011132.10	1	LUSC
ENSG00000225833.1.vs.ENSG00000130234.9	1	COAD
ENSG00000167515.9.vs.ENSG00000141012.11	3	PRAD,HNSC,KIRC
ENSG00000100227.16.vs.ENSG00000270022.3	1	LUAD
ENSG00000231249.1.vs.ENSG00000150995.16	3	LUAD,LUSC,BLCA
ENSG00000125995.14.vs.ENSG00000244005.11	1	KIRC
ENSG00000142330.18.vs.ENSG00000260942.1	1	LIHC
ENSG00000149573.7.vs.ENSG00000280032.1	4	STAD,PRAD,COAD,THCA
ENSG00000213865.6.vs.ENSG00000175073.7	2	LUAD,KIRC
ENSG00000123213.21.vs.ENSG00000197860.8	6	LIHC,PRAD,BLCA,KIRC,BRCA,THCA
ENSG00000099940.10.vs.ENSG00000241973.9	2	PRAD,KIRC
ENSG00000173531.14.vs.ENSG00000164068.14	3	LIHC,STAD,HNSC
ENSG00000124641.13.vs.ENSG00000112578.8	4	LUSC,PRAD,KIRC,BRCA
ENSG00000274012.1.vs.ENSG00000278002.1	1	LUAD
ENSG00000135763.8.vs.ENSG00000135801.8	5	LIHC,LUSC,KIRC,KIRP,BRCA
ENSG00000166484.18.vs.ENSG00000108641.13	3	STAD,COAD,BRCA
ENSG00000104356.9.vs.ENSG00000132541.9	5	STAD,LUAD,PRAD,COAD,KIRC
ENSG00000137074.17.vs.ENSG00000086061.14	2	LIHC,BRCA
ENSG00000172345.12.vs.ENSG00000259343.4	2	LIHC,BRCA
ENSG00000267219.1.vs.ENSG00000105220.13	1	KIRP
ENSG00000248278.1.vs.ENSG00000159202.16	2	BLCA,BRCA
ENSG00000021826.13.vs.ENSG00000115365.10	1	PRAD
ENSG00000112697.14.vs.ENSG00000225793.2	1	LUAD
ENSG00000251307.1.vs.ENSG00000152669.8	2	PRAD,UCEC
ENSG00000126432.12.vs.ENSG00000173113.5	2	LUSC,THCA
ENSG00000164211.11.vs.ENSG00000246859.2	3	LUAD,HNSC,BRCA
ENSG00000140839.10.vs.ENSG00000261170.1	1	KIRC
ENSG00000215424.8.vs.ENSG00000160285.13	1	STAD
ENSG00000273272.1.vs.ENSG00000272666.1	2	HNSC,BRCA
ENSG00000177239.13.vs.ENSG00000268996.3	2	LUSC,HNSC
ENSG00000138698.13.vs.ENSG00000214559.3	1	BRCA
ENSG00000013563.12.vs.ENSG00000102125.14	3	LIHC,STAD,UCEC
ENSG00000132591.10.vs.ENSG00000173065.12	2	BLCA,BRCA
ENSG00000262904.1.vs.ENSG00000168411.12	1	LUSC
ENSG00000140718.17.vs.ENSG00000103494.11	2	HNSC,BRCA
ENSG00000221947.6.vs.ENSG00000147592.7	2	STAD,LUAD
ENSG00000174939.9.vs.ENSG00000174938.13	1	UCEC
ENSG00000225138.6.vs.ENSG00000188242.4	3	KIRP,BRCA,UCEC
ENSG00000235078.1.vs.ENSG00000182551.12	1	LIHC
ENSG00000108342.11.vs.ENSG00000265799.1	2	LUAD,BLCA
ENSG00000250751.1.vs.ENSG00000121073.12	1	STAD
ENSG00000197863.7.vs.ENSG00000251247.8	2	HNSC,BRCA
ENSG00000114209.13.vs.ENSG00000163536.11	1	HNSC
ENSG00000205268.9.vs.ENSG00000272192.1	1	STAD
ENSG00000175220.10.vs.ENSG00000175213.2	1	LUSC
ENSG00000122566.19.vs.ENSG00000122565.17	1	KIRC
ENSG00000229167.1.vs.ENSG00000142910.14	3	STAD,LUAD,COAD
ENSG00000133872.12.vs.ENSG00000272256.1	3	STAD,PRAD,UCEC
ENSG00000230510.5.vs.ENSG00000160014.15	1	BRCA
ENSG00000237054.8.vs.ENSG00000100461.16	1	BRCA
ENSG00000085733.14.vs.ENSG00000246889.2	1	STAD
ENSG00000070061.13.vs.ENSG00000119328.10	2	LIHC,COAD
ENSG00000106144.18.vs.ENSG00000231840.1	1	KIRC
ENSG00000211451.10.vs.ENSG00000131779.9	1	COAD
ENSG00000122376.10.vs.ENSG00000148672.8	2	STAD,BRCA
ENSG00000136874.9.vs.ENSG00000255145.2	2	BLCA,BRCA
ENSG00000246331.2.vs.ENSG00000110888.16	1	PRAD
ENSG00000166821.7.vs.ENSG00000140527.13	1	BRCA
ENSG00000260493.1.vs.ENSG00000133740.9	1	LUAD
ENSG00000178188.13.vs.ENSG00000178952.7	1	UCEC
ENSG00000100288.18.vs.ENSG00000008735.13	1	BRCA
ENSG00000212694.7.vs.ENSG00000139718.9	1	LIHC
ENSG00000151881.13.vs.ENSG00000249492.1	1	KIRP
ENSG00000104901.5.vs.ENSG00000074219.12	3	LUAD,BLCA,KIRP
ENSG00000225981.1.vs.ENSG00000164877.17	1	KIRP
ENSG00000261480.1.vs.ENSG00000248334.5	1	KIRP
ENSG00000280040.1.vs.ENSG00000162627.15	4	STAD,LUAD,KIRC,BRCA
ENSG00000256223.4.vs.ENSG00000214029.4	2	LIHC,BRCA
ENSG00000255198.4.vs.ENSG00000140988.14	1	HNSC
ENSG00000143479.14.vs.ENSG00000237605.1	1	LUSC
ENSG00000146955.9.vs.ENSG00000157800.16	2	STAD,LUAD
ENSG00000107099.14.vs.ENSG00000183784.6	2	STAD,PRAD
ENSG00000161714.10.vs.ENSG00000181513.13	2	LIHC,LUAD
ENSG00000261136.1.vs.ENSG00000150667.6	1	BRCA
ENSG00000189091.11.vs.ENSG00000103051.17	2	LIHC,PRAD
ENSG00000251537.4.vs.ENSG00000266261.1	1	HNSC
ENSG00000196177.11.vs.ENSG00000095574.10	2	LIHC,COAD
ENSG00000083093.8.vs.ENSG00000166847.8	5	STAD,LUSC,BLCA,BRCA,UCEC
ENSG00000179476.6.vs.ENSG00000258633.1	1	HNSC
ENSG00000254286.4.vs.ENSG00000168672.3	4	LIHC,LUAD,KIRC,THCA
ENSG00000154845.14.vs.ENSG00000263627.1	1	PRAD
ENSG00000260586.1.vs.ENSG00000212664.5	1	BRCA
ENSG00000116918.12.vs.ENSG00000233461.4	4	LIHC,LUAD,LUSC,PRAD
ENSG00000198133.7.vs.ENSG00000054690.12	1	BLCA
ENSG00000224215.1.vs.ENSG00000179133.10	1	KIRP
ENSG00000268812.3.vs.ENSG00000128342.4	6	STAD,PRAD,HNSC,BRCA,THCA,UCEC
ENSG00000231856.2.vs.ENSG00000102796.9	2	PRAD,BRCA
ENSG00000228839.4.vs.ENSG00000100100.11	2	KIRC,BRCA
ENSG00000105879.10.vs.ENSG00000241764.3	4	LUAD,HNSC,KIRC,UCEC
ENSG00000279641.1.vs.ENSG00000170296.8	2	COAD,BRCA
ENSG00000161939.17.vs.ENSG00000215067.8	1	LIHC
ENSG00000100852.11.vs.ENSG00000258655.2	3	BLCA,KIRP,BRCA
ENSG00000188227.11.vs.ENSG00000266916.4	4	STAD,HNSC,BRCA,THCA
ENSG00000241990.4.vs.ENSG00000182257.6	4	LIHC,LUAD,PRAD,BRCA
ENSG00000108666.8.vs.ENSG00000010244.15	1	BRCA
ENSG00000068971.12.vs.ENSG00000110046.11	1	BRCA
ENSG00000142634.11.vs.ENSG00000228140.1	1	PRAD
ENSG00000205464.10.vs.ENSG00000186468.11	2	LIHC,HNSC
ENSG00000164609.8.vs.ENSG00000164611.11	3	LUAD,BRCA,THCA
ENSG00000065491.8.vs.ENSG00000172738.10	5	LUSC,KIRC,KIRP,BRCA,UCEC
ENSG00000125531.6.vs.ENSG00000125508.3	1	BRCA
ENSG00000135486.16.vs.ENSG00000094916.12	1	BRCA
ENSG00000267106.4.vs.ENSG00000171469.9	2	HNSC,KIRC
ENSG00000134755.13.vs.ENSG00000265888.1	2	PRAD,KIRC
ENSG00000168538.14.vs.ENSG00000182552.13	1	LUSC
ENSG00000260778.3.vs.ENSG00000205937.10	3	STAD,LUAD,BRCA
ENSG00000104892.15.vs.ENSG00000242675.1	2	LUAD,BLCA
ENSG00000106080.9.vs.ENSG00000106086.17	2	STAD,LUAD
ENSG00000160188.8.vs.ENSG00000160190.12	2	PRAD,BRCA
ENSG00000227220.1.vs.ENSG00000118523.5	3	STAD,PRAD,HNSC
ENSG00000166881.8.vs.ENSG00000166886.11	3	LUAD,KIRC,THCA
ENSG00000272767.1.vs.ENSG00000171988.16	1	BRCA
ENSG00000163288.12.vs.ENSG00000109158.9	1	BRCA
ENSG00000138172.9.vs.ENSG00000234699.1	1	THCA
ENSG00000100312.9.vs.ENSG00000225929.1	2	STAD,KIRC
ENSG00000101247.16.vs.ENSG00000089048.13	3	LIHC,STAD,HNSC
ENSG00000167900.10.vs.ENSG00000183077.14	1	STAD
ENSG00000248801.5.vs.ENSG00000165084.14	3	KIRC,KIRP,UCEC
ENSG00000228327.2.vs.ENSG00000237491.7	1	LIHC
ENSG00000168661.13.vs.ENSG00000270876.1	2	STAD,BRCA
ENSG00000138768.13.vs.ENSG00000138757.13	1	KIRP
ENSG00000184557.4.vs.ENSG00000266970.1	2	LUAD,LUSC
ENSG00000260750.4.vs.ENSG00000140948.10	1	STAD
ENSG00000222001.2.vs.ENSG00000066248.13	1	STAD
ENSG00000168488.17.vs.ENSG00000275807.1	4	LIHC,LUAD,COAD,UCEC
ENSG00000271581.1.vs.ENSG00000234745.8	4	LUSC,PRAD,BRCA,UCEC
ENSG00000106546.11.vs.ENSG00000237773.4	2	STAD,THCA
ENSG00000127980.14.vs.ENSG00000127993.13	3	STAD,LUAD,COAD
ENSG00000132024.16.vs.ENSG00000132016.10	2	LUSC,THCA
ENSG00000173207.11.vs.ENSG00000160691.17	2	LUAD,BRCA
ENSG00000169442.7.vs.ENSG00000158062.19	1	LUAD
ENSG00000109572.12.vs.ENSG00000137601.14	1	KIRP
ENSG00000186310.9.vs.ENSG00000179083.6	1	THCA
ENSG00000185261.12.vs.ENSG00000133302.11	2	LUAD,BRCA
ENSG00000171766.14.vs.ENSG00000171763.16	1	BRCA
ENSG00000198003.10.vs.ENSG00000130175.8	2	LUSC,UCEC
ENSG00000233296.1.vs.ENSG00000151353.13	1	PRAD
ENSG00000112237.11.vs.ENSG00000272017.1	2	LIHC,STAD
ENSG00000246528.3.vs.ENSG00000137571.9	3	PRAD,HNSC,BRCA
ENSG00000126524.8.vs.ENSG00000198874.11	2	STAD,LUAD
ENSG00000267852.1.vs.ENSG00000104880.16	1	LUSC
ENSG00000105778.16.vs.ENSG00000106355.8	3	STAD,KIRC,BRCA
ENSG00000230074.1.vs.ENSG00000187186.13	2	LUAD,COAD
ENSG00000162490.6.vs.ENSG00000116670.13	2	LUAD,THCA
ENSG00000257949.5.vs.ENSG00000161533.10	2	STAD,KIRP
ENSG00000160392.12.vs.ENSG00000105223.17	2	LUAD,BRCA
ENSG00000164330.15.vs.ENSG00000245812.2	1	PRAD
ENSG00000230795.2.vs.ENSG00000227262.3	1	LUSC
ENSG00000107262.15.vs.ENSG00000086065.12	1	LUSC
ENSG00000196419.11.vs.ENSG00000100418.7	2	LUSC,BRCA
ENSG00000111206.11.vs.ENSG00000171792.9	1	LUSC
ENSG00000136450.11.vs.ENSG00000279069.1	1	BLCA
ENSG00000173171.13.vs.ENSG00000169231.12	1	HNSC
ENSG00000087263.15.vs.ENSG00000167005.12	1	PRAD
ENSG00000143924.17.vs.ENSG00000224875.2	2	LIHC,KIRP
ENSG00000234396.3.vs.ENSG00000162585.15	1	STAD
ENSG00000241769.6.vs.ENSG00000197620.9	1	BLCA
ENSG00000138175.8.vs.ENSG00000156398.11	1	UCEC
ENSG00000179698.12.vs.ENSG00000179526.15	1	LUSC
ENSG00000273129.1.vs.ENSG00000073756.10	2	LUAD,HNSC
ENSG00000112473.15.vs.ENSG00000204231.9	5	STAD,LUSC,BLCA,BRCA,UCEC
ENSG00000198843.11.vs.ENSG00000120742.9	4	STAD,LUAD,HNSC,KIRC
ENSG00000139842.13.vs.ENSG00000126226.20	2	HNSC,BRCA
ENSG00000100284.19.vs.ENSG00000273176.1	1	LUSC
ENSG00000160075.11.vs.ENSG00000215014.4	1	LIHC
ENSG00000170791.16.vs.ENSG00000181690.6	3	LUAD,BRCA,THCA
ENSG00000279536.1.vs.ENSG00000204934.9	2	KIRC,THCA
ENSG00000262246.4.vs.ENSG00000103423.12	3	STAD,BRCA,THCA
ENSG00000171720.8.vs.ENSG00000164620.7	2	HNSC,KIRP
ENSG00000166452.10.vs.ENSG00000166444.16	1	KIRC
ENSG00000250535.1.vs.ENSG00000248290.1	2	LIHC,KIRP
ENSG00000254788.5.vs.ENSG00000166548.14	2	STAD,HNSC
ENSG00000111358.12.vs.ENSG00000111361.11	2	LIHC,KIRC
ENSG00000164304.14.vs.ENSG00000124784.7	1	LUSC
ENSG00000080298.14.vs.ENSG00000232104.3	2	PRAD,COAD
ENSG00000228395.1.vs.ENSG00000197694.12	1	STAD
ENSG00000107798.16.vs.ENSG00000152778.8	1	STAD
ENSG00000183576.11.vs.ENSG00000090061.16	1	BRCA
ENSG00000278611.1.vs.ENSG00000130818.9	2	LUSC,THCA
ENSG00000228201.1.vs.ENSG00000161996.16	1	KIRC
ENSG00000159882.11.vs.ENSG00000266921.1	3	LIHC,BRCA,THCA
ENSG00000277763.1.vs.ENSG00000139946.8	2	KIRP,THCA
ENSG00000179168.13.vs.ENSG00000188766.11	4	STAD,LUAD,PRAD,HNSC
ENSG00000155792.8.vs.ENSG00000245330.4	3	LIHC,LUAD,BRCA
ENSG00000223552.1.vs.ENSG00000121797.9	3	LIHC,STAD,HNSC
ENSG00000184445.10.vs.ENSG00000111011.16	2	LIHC,LUAD
ENSG00000204390.9.vs.ENSG00000204389.9	2	KIRC,UCEC
ENSG00000181222.13.vs.ENSG00000174282.10	2	COAD,UCEC
ENSG00000260958.2.vs.ENSG00000261274.1	1	HNSC
ENSG00000203321.2.vs.ENSG00000135045.6	1	COAD
ENSG00000264575.1.vs.ENSG00000263753.5	1	COAD
ENSG00000273344.1.vs.ENSG00000157212.17	3	LUAD,COAD,KIRC
ENSG00000185130.5.vs.ENSG00000196747.4	2	LUAD,BRCA
ENSG00000120690.12.vs.ENSG00000120688.8	2	STAD,BRCA
ENSG00000006837.10.vs.ENSG00000119048.6	3	STAD,LUAD,PRAD
ENSG00000280426.1.vs.ENSG00000076513.15	1	PRAD
ENSG00000280193.1.vs.ENSG00000253598.1	1	COAD
ENSG00000236773.1.vs.ENSG00000143753.11	1	HNSC
ENSG00000206527.8.vs.ENSG00000239523.4	1	LUSC
ENSG00000259353.1.vs.ENSG00000259738.1	1	HNSC
ENSG00000269176.2.vs.ENSG00000185475.7	2	LUAD,LUSC
ENSG00000205981.5.vs.ENSG00000242808.6	2	STAD,KIRC
ENSG00000229021.2.vs.ENSG00000197747.7	5	LUSC,BLCA,COAD,HNSC,BRCA
ENSG00000005175.8.vs.ENSG00000257433.4	1	LIHC
ENSG00000092094.9.vs.ENSG00000100823.10	1	HNSC
ENSG00000104765.13.vs.ENSG00000228451.3	2	STAD,UCEC
ENSG00000127452.7.vs.ENSG00000198258.9	1	LUSC
ENSG00000197882.3.vs.ENSG00000269895.1	1	STAD
ENSG00000110063.7.vs.ENSG00000255062.1	2	LUAD,HNSC
ENSG00000274269.1.vs.ENSG00000125895.5	1	STAD
ENSG00000185681.11.vs.ENSG00000119421.6	1	HNSC
ENSG00000159063.11.vs.ENSG00000246174.6	2	LUAD,PRAD
ENSG00000267064.1.vs.ENSG00000126756.10	3	STAD,BLCA,COAD
ENSG00000198088.9.vs.ENSG00000080572.11	1	UCEC
ENSG00000255328.1.vs.ENSG00000270030.1	1	LUSC
ENSG00000140836.13.vs.ENSG00000271009.2	1	STAD
ENSG00000120725.11.vs.ENSG00000015479.16	2	LUAD,BRCA
ENSG00000204220.8.vs.ENSG00000227057.6	3	BRCA,THCA,UCEC
ENSG00000120685.18.vs.ENSG00000188811.11	3	PRAD,KIRP,BRCA
ENSG00000248473.1.vs.ENSG00000250222.1	1	COAD
ENSG00000255690.2.vs.ENSG00000228421.2	1	COAD
ENSG00000198924.6.vs.ENSG00000196865.4	5	LUAD,BLCA,HNSC,BRCA,UCEC
ENSG00000181544.12.vs.ENSG00000130150.10	1	COAD
ENSG00000174586.9.vs.ENSG00000269054.1	2	COAD,HNSC
ENSG00000179134.13.vs.ENSG00000130755.11	3	LUAD,KIRC,BRCA
ENSG00000167323.8.vs.ENSG00000228661.1	3	LIHC,BLCA,THCA
ENSG00000223473.2.vs.ENSG00000237310.1	3	LUSC,COAD,UCEC
ENSG00000185803.7.vs.ENSG00000261587.2	3	LUSC,BLCA,COAD
ENSG00000274751.1.vs.ENSG00000103275.17	2	LUSC,BRCA
ENSG00000253973.2.vs.ENSG00000175352.9	1	LUSC
ENSG00000162543.5.vs.ENSG00000225986.1	3	LIHC,STAD,BRCA
ENSG00000107485.14.vs.ENSG00000197308.7	1	KIRC
ENSG00000130303.11.vs.ENSG00000269640.4	2	PRAD,KIRP
ENSG00000070610.13.vs.ENSG00000107185.9	1	LUSC
ENSG00000026508.15.vs.ENSG00000255521.1	2	BRCA,THCA
ENSG00000243701.4.vs.ENSG00000242759.5	1	PRAD
ENSG00000260260.1.vs.ENSG00000131653.11	2	LIHC,HNSC
ENSG00000198242.12.vs.ENSG00000109113.16	1	LIHC
ENSG00000124217.4.vs.ENSG00000000419.11	3	STAD,KIRC,KIRP
ENSG00000258458.4.vs.ENSG00000155463.11	2	STAD,BRCA
ENSG00000130821.14.vs.ENSG00000130822.14	1	BRCA
ENSG00000163026.10.vs.ENSG00000119782.12	1	PRAD
ENSG00000100439.9.vs.ENSG00000275552.1	1	STAD
ENSG00000172780.15.vs.ENSG00000273174.1	2	LIHC,THCA
ENSG00000152782.15.vs.ENSG00000232936.4	1	STAD
ENSG00000161671.15.vs.ENSG00000142530.9	2	LUAD,LUSC
ENSG00000159086.13.vs.ENSG00000205930.7	2	LUSC,BRCA
ENSG00000280255.1.vs.ENSG00000122548.5	1	PRAD
ENSG00000198879.10.vs.ENSG00000278982.1	2	LIHC,COAD
ENSG00000166770.9.vs.ENSG00000198046.10	2	STAD,BRCA
ENSG00000160208.12.vs.ENSG00000160207.7	1	LUSC
ENSG00000245937.6.vs.ENSG00000064651.12	1	STAD
ENSG00000145014.16.vs.ENSG00000229334.1	1	KIRC
ENSG00000116586.10.vs.ENSG00000160803.7	2	LUAD,THCA
ENSG00000275263.1.vs.ENSG00000099381.15	1	BLCA
ENSG00000183032.9.vs.ENSG00000258708.1	2	BRCA,THCA
ENSG00000101246.18.vs.ENSG00000197114.10	2	BLCA,KIRC
ENSG00000145723.15.vs.ENSG00000145725.18	1	BRCA
ENSG00000250616.2.vs.ENSG00000090238.10	2	COAD,BRCA
ENSG00000268603.1.vs.ENSG00000144591.16	1	BRCA
ENSG00000259172.1.vs.ENSG00000131876.15	1	BRCA
ENSG00000262693.1.vs.ENSG00000180787.5	1	STAD
ENSG00000254837.2.vs.ENSG00000175536.6	3	LUAD,HNSC,UCEC
ENSG00000214941.6.vs.ENSG00000011295.14	3	COAD,KIRP,BRCA
ENSG00000258748.1.vs.ENSG00000066735.13	1	COAD
ENSG00000141013.13.vs.ENSG00000003249.12	5	LIHC,PRAD,BLCA,HNSC,KIRP
ENSG00000188312.12.vs.ENSG00000198000.10	2	LIHC,BRCA
ENSG00000145476.14.vs.ENSG00000279943.1	1	LUSC
ENSG00000271737.1.vs.ENSG00000213585.9	2	BRCA,UCEC
ENSG00000167962.11.vs.ENSG00000183971.5	1	BRCA
ENSG00000185716.10.vs.ENSG00000275445.1	1	PRAD
ENSG00000166153.15.vs.ENSG00000136021.16	1	KIRC
ENSG00000107796.11.vs.ENSG00000026103.18	3	LIHC,STAD,PRAD
ENSG00000137821.10.vs.ENSG00000166173.10	2	PRAD,COAD
ENSG00000256294.6.vs.ENSG00000186019.10	3	LIHC,PRAD,BRCA
ENSG00000007545.14.vs.ENSG00000187535.12	1	BRCA
ENSG00000279227.1.vs.ENSG00000125633.9	1	STAD
ENSG00000267120.3.vs.ENSG00000205155.6	1	LUAD
ENSG00000168438.13.vs.ENSG00000112290.11	1	LIHC
ENSG00000139579.11.vs.ENSG00000181852.16	1	BRCA
ENSG00000101546.11.vs.ENSG00000141759.13	2	STAD,KIRC
ENSG00000223935.1.vs.ENSG00000119862.11	3	LIHC,KIRC,BRCA
ENSG00000111802.12.vs.ENSG00000112304.9	2	LUSC,PRAD
ENSG00000226995.6.vs.ENSG00000230563.2	1	COAD
ENSG00000138696.9.vs.ENSG00000249599.1	1	PRAD
ENSG00000166135.12.vs.ENSG00000255339.5	1	UCEC
ENSG00000265060.1.vs.ENSG00000266830.1	2	LUAD,UCEC
ENSG00000187790.9.vs.ENSG00000100442.9	1	UCEC
ENSG00000154174.7.vs.ENSG00000206535.6	1	KIRC
ENSG00000178852.14.vs.ENSG00000263293.2	1	KIRC
ENSG00000033178.11.vs.ENSG00000248049.5	1	KIRC
ENSG00000115271.9.vs.ENSG00000115267.5	2	LIHC,BRCA
ENSG00000134077.14.vs.ENSG00000196220.14	1	STAD
ENSG00000117500.11.vs.ENSG00000122483.16	2	LIHC,THCA
ENSG00000114023.14.vs.ENSG00000160124.8	2	HNSC,KIRC
ENSG00000267523.1.vs.ENSG00000063245.13	1	LIHC
ENSG00000277075.1.vs.ENSG00000273802.1	3	LUSC,HNSC,KIRC
ENSG00000224713.4.vs.ENSG00000135502.15	2	HNSC,BRCA
ENSG00000229589.1.vs.ENSG00000114739.12	3	STAD,LUAD,KIRC
ENSG00000186660.14.vs.ENSG00000110031.11	2	LIHC,HNSC
ENSG00000100024.13.vs.ENSG00000178803.9	4	STAD,BLCA,KIRC,KIRP
ENSG00000129214.13.vs.ENSG00000129245.10	3	HNSC,KIRC,BRCA
ENSG00000099849.13.vs.ENSG00000185522.7	3	BLCA,KIRC,KIRP
ENSG00000006747.13.vs.ENSG00000225606.1	2	HNSC,KIRP
ENSG00000114790.11.vs.ENSG00000243069.6	3	LUSC,THCA,UCEC
ENSG00000121297.6.vs.ENSG00000267662.1	1	THCA
ENSG00000172366.18.vs.ENSG00000130731.14	4	STAD,LUAD,KIRC,BRCA
ENSG00000082213.16.vs.ENSG00000113360.15	3	LUSC,HNSC,BRCA
ENSG00000274560.1.vs.ENSG00000111666.9	2	BRCA,THCA
ENSG00000164176.11.vs.ENSG00000250320.4	1	HNSC
ENSG00000135404.10.vs.ENSG00000258056.2	1	THCA
ENSG00000185825.14.vs.ENSG00000101986.11	3	STAD,BLCA,HNSC
ENSG00000269867.1.vs.ENSG00000270804.1	4	LIHC,PRAD,BRCA,THCA
ENSG00000245888.5.vs.ENSG00000169189.15	1	STAD
ENSG00000159131.15.vs.ENSG00000159140.16	2	LUSC,BRCA
ENSG00000077800.10.vs.ENSG00000146755.9	1	PRAD
ENSG00000075336.10.vs.ENSG00000141665.10	2	STAD,KIRP
ENSG00000231728.3.vs.ENSG00000158427.13	2	LUSC,BRCA
ENSG00000168374.9.vs.ENSG00000272146.4	2	LUSC,HNSC
ENSG00000140025.14.vs.ENSG00000042088.12	1	COAD
ENSG00000229873.1.vs.ENSG00000060491.15	2	LIHC,KIRC
ENSG00000028528.13.vs.ENSG00000166797.9	1	BRCA
ENSG00000120647.8.vs.ENSG00000073614.10	1	COAD
ENSG00000235688.1.vs.ENSG00000172554.10	4	STAD,PRAD,HNSC,KIRC
ENSG00000234171.2.vs.ENSG00000171865.8	2	LIHC,STAD
ENSG00000272844.1.vs.ENSG00000163607.13	1	STAD
ENSG00000225938.1.vs.ENSG00000170989.8	3	LUSC,PRAD,BRCA
ENSG00000101290.12.vs.ENSG00000132646.9	2	STAD,COAD
ENSG00000183340.6.vs.ENSG00000149231.10	2	STAD,KIRP
ENSG00000126003.6.vs.ENSG00000101346.10	2	KIRP,BRCA
ENSG00000182944.16.vs.ENSG00000100263.12	1	LIHC
ENSG00000137871.18.vs.ENSG00000140262.16	1	LIHC
ENSG00000015133.17.vs.ENSG00000258798.1	1	LUAD
ENSG00000143179.11.vs.ENSG00000143183.15	1	BRCA
ENSG00000074071.12.vs.ENSG00000197774.11	1	UCEC
ENSG00000258343.1.vs.ENSG00000139343.9	1	KIRP
ENSG00000261189.1.vs.ENSG00000096696.12	2	BLCA,KIRP
ENSG00000225449.3.vs.ENSG00000222014.5	1	STAD
ENSG00000166166.11.vs.ENSG00000260285.1	2	LUAD,BRCA
ENSG00000245060.5.vs.ENSG00000278970.1	1	LIHC
ENSG00000253647.1.vs.ENSG00000145936.7	1	STAD
ENSG00000124702.16.vs.ENSG00000124733.3	2	LIHC,BRCA
ENSG00000162769.11.vs.ENSG00000198468.6	2	LUSC,BRCA
ENSG00000273492.4.vs.ENSG00000142192.19	3	STAD,LUSC,BLCA
ENSG00000259332.2.vs.ENSG00000259642.2	2	LUAD,PRAD
ENSG00000237233.2.vs.ENSG00000196932.10	2	STAD,PRAD
ENSG00000076242.13.vs.ENSG00000178567.7	1	COAD
ENSG00000204899.5.vs.ENSG00000136122.14	2	COAD,BRCA
ENSG00000197381.14.vs.ENSG00000235374.2	1	UCEC
ENSG00000101473.15.vs.ENSG00000132801.6	2	STAD,PRAD
ENSG00000161653.9.vs.ENSG00000131096.9	1	KIRC
ENSG00000174917.7.vs.ENSG00000167733.12	2	LUSC,THCA
ENSG00000230424.1.vs.ENSG00000127481.13	1	LIHC
ENSG00000132383.10.vs.ENSG00000186532.10	3	STAD,COAD,HNSC
ENSG00000111203.10.vs.ENSG00000258325.2	2	LUAD,BRCA
ENSG00000183674.10.vs.ENSG00000229401.1	1	HNSC
ENSG00000267191.1.vs.ENSG00000176222.8	4	STAD,HNSC,BRCA,THCA
ENSG00000196096.3.vs.ENSG00000144451.17	1	STAD
ENSG00000263142.4.vs.ENSG00000179673.4	2	LIHC,BLCA
ENSG00000157106.15.vs.ENSG00000260352.1	2	KIRC,BRCA
ENSG00000203279.3.vs.ENSG00000254876.4	3	LIHC,STAD,LUSC
ENSG00000243479.3.vs.ENSG00000130675.13	5	STAD,LUAD,PRAD,COAD,KIRC
ENSG00000117877.9.vs.ENSG00000104881.13	3	STAD,PRAD,BRCA
ENSG00000105649.8.vs.ENSG00000268650.3	2	STAD,THCA
ENSG00000169136.7.vs.ENSG00000104951.14	3	LUAD,HNSC,BRCA
ENSG00000104388.13.vs.ENSG00000251396.5	4	LUAD,LUSC,KIRC,BRCA
ENSG00000148248.12.vs.ENSG00000198870.7	2	LIHC,HNSC
ENSG00000171962.16.vs.ENSG00000175662.16	3	LIHC,LUAD,COAD
ENSG00000138814.15.vs.ENSG00000254531.1	3	LIHC,PRAD,BRCA
ENSG00000184678.9.vs.ENSG00000184260.5	3	LIHC,STAD,KIRC
ENSG00000245067.5.vs.ENSG00000163453.10	2	STAD,THCA
ENSG00000179403.11.vs.ENSG00000225285.1	3	LUSC,COAD,HNSC
ENSG00000263412.1.vs.ENSG00000082641.14	1	LIHC
ENSG00000254016.2.vs.ENSG00000171847.9	1	STAD
ENSG00000255129.4.vs.ENSG00000149292.15	2	LUAD,BRCA
ENSG00000162227.6.vs.ENSG00000267811.1	2	LUSC,PRAD
ENSG00000166598.11.vs.ENSG00000214198.6	1	PRAD
ENSG00000079134.10.vs.ENSG00000263884.1	1	KIRP
ENSG00000214184.3.vs.ENSG00000169756.15	1	STAD
ENSG00000111215.10.vs.ENSG00000256537.3	1	LUSC
ENSG00000234235.1.vs.ENSG00000176720.4	1	HNSC
ENSG00000268606.4.vs.ENSG00000268916.4	1	STAD
ENSG00000136942.13.vs.ENSG00000136950.12	3	LIHC,STAD,LUSC
ENSG00000115255.9.vs.ENSG00000115257.14	3	LUSC,HNSC,THCA
ENSG00000127328.20.vs.ENSG00000247131.4	1	BRCA
ENSG00000221909.2.vs.ENSG00000272647.1	1	LUAD
ENSG00000204261.7.vs.ENSG00000204264.7	6	STAD,LUSC,PRAD,HNSC,BRCA,UCEC
ENSG00000173457.9.vs.ENSG00000256940.1	3	LUAD,BLCA,COAD
ENSG00000229956.8.vs.ENSG00000132485.11	2	LUSC,PRAD
ENSG00000268592.3.vs.ENSG00000120256.8	1	STAD
ENSG00000090889.11.vs.ENSG00000120509.9	3	COAD,HNSC,BRCA
ENSG00000266441.1.vs.ENSG00000088756.11	1	PRAD
ENSG00000162413.15.vs.ENSG00000116273.5	1	LIHC
ENSG00000240207.5.vs.ENSG00000118849.8	2	BLCA,HNSC
ENSG00000260288.3.vs.ENSG00000246877.1	2	LIHC,BRCA
ENSG00000123064.11.vs.ENSG00000139405.14	1	UCEC
ENSG00000254369.5.vs.ENSG00000197576.12	1	BRCA
ENSG00000225439.2.vs.ENSG00000163170.10	1	KIRC
ENSG00000241058.2.vs.ENSG00000165997.4	3	LIHC,STAD,BRCA
ENSG00000273394.1.vs.ENSG00000184307.12	1	STAD
ENSG00000277232.2.vs.ENSG00000075218.17	3	STAD,COAD,BRCA
ENSG00000278376.1.vs.ENSG00000110367.10	2	LUAD,BRCA
ENSG00000160932.9.vs.ENSG00000247317.3	3	LUAD,HNSC,THCA
ENSG00000271270.4.vs.ENSG00000172765.15	1	KIRP
ENSG00000163463.10.vs.ENSG00000163462.16	1	LUAD
ENSG00000141540.9.vs.ENSG00000246731.2	2	COAD,BRCA
ENSG00000125388.18.vs.ENSG00000087269.14	2	KIRC,KIRP
ENSG00000154153.12.vs.ENSG00000250415.1	1	KIRC
ENSG00000137522.16.vs.ENSG00000254469.6	1	HNSC
ENSG00000161981.9.vs.ENSG00000161980.5	3	LUAD,LUSC,BRCA
ENSG00000197894.9.vs.ENSG00000246090.5	1	STAD
ENSG00000144847.11.vs.ENSG00000163424.7	3	STAD,LUAD,KIRP
ENSG00000262251.1.vs.ENSG00000141499.15	2	STAD,COAD
ENSG00000099968.16.vs.ENSG00000131100.11	1	STAD
ENSG00000185267.8.vs.ENSG00000187522.12	2	HNSC,BRCA
ENSG00000267470.4.vs.ENSG00000180458.2	3	STAD,LUSC,KIRC
ENSG00000215271.7.vs.ENSG00000129473.8	1	BRCA
ENSG00000246790.2.vs.ENSG00000137642.11	1	LUSC
ENSG00000116299.15.vs.ENSG00000179902.11	3	LUAD,THCA,UCEC
ENSG00000115307.15.vs.ENSG00000115317.10	1	THCA
ENSG00000164338.8.vs.ENSG00000164331.8	2	LUAD,BRCA
ENSG00000138083.4.vs.ENSG00000236502.1	2	STAD,BRCA
ENSG00000248240.1.vs.ENSG00000172244.7	1	UCEC
ENSG00000167395.10.vs.ENSG00000167394.11	3	LUAD,BLCA,KIRC
ENSG00000259446.4.vs.ENSG00000198838.10	3	PRAD,HNSC,BRCA
ENSG00000144554.9.vs.ENSG00000186162.9	1	STAD
ENSG00000259349.1.vs.ENSG00000062725.8	1	BRCA
ENSG00000155827.10.vs.ENSG00000165152.7	1	LUSC
ENSG00000225506.2.vs.ENSG00000224805.2	1	LIHC
ENSG00000168497.4.vs.ENSG00000233766.6	1	PRAD
ENSG00000251364.5.vs.ENSG00000166387.10	2	LUSC,THCA
ENSG00000263307.1.vs.ENSG00000171490.11	1	BRCA
ENSG00000254024.1.vs.ENSG00000083307.9	2	LUAD,PRAD
ENSG00000080546.12.vs.ENSG00000183137.13	3	LIHC,HNSC,KIRC
ENSG00000170310.13.vs.ENSG00000166596.13	1	COAD
ENSG00000169047.5.vs.ENSG00000272622.1	3	STAD,LUAD,BRCA
ENSG00000275944.1.vs.ENSG00000275688.3	2	LUAD,COAD
ENSG00000178467.16.vs.ENSG00000223343.1	1	COAD
ENSG00000186480.11.vs.ENSG00000273117.1	1	COAD
ENSG00000100811.9.vs.ENSG00000258982.1	1	BRCA
ENSG00000109079.8.vs.ENSG00000109083.12	1	BRCA
ENSG00000086189.8.vs.ENSG00000086200.15	1	BRCA
ENSG00000247572.6.vs.ENSG00000131732.10	2	HNSC,UCEC
ENSG00000119203.12.vs.ENSG00000119185.11	2	LIHC,STAD
ENSG00000168152.11.vs.ENSG00000138674.15	3	LIHC,STAD,BRCA
ENSG00000272953.1.vs.ENSG00000182095.13	4	STAD,BLCA,COAD,KIRC
ENSG00000065000.14.vs.ENSG00000104885.16	2	LIHC,LUSC
ENSG00000213397.9.vs.ENSG00000182492.14	2	STAD,BRCA
ENSG00000253948.1.vs.ENSG00000132549.17	1	LUAD
ENSG00000130856.14.vs.ENSG00000264278.1	1	KIRP
ENSG00000128059.7.vs.ENSG00000128050.7	4	LIHC,PRAD,COAD,KIRP
ENSG00000215375.5.vs.ENSG00000169020.8	1	STAD
ENSG00000216895.7.vs.ENSG00000184863.9	1	BRCA
ENSG00000196411.8.vs.ENSG00000146828.16	3	STAD,LUAD,KIRC
ENSG00000197530.11.vs.ENSG00000272106.1	5	LIHC,PRAD,COAD,HNSC,BRCA
ENSG00000004455.15.vs.ENSG00000142920.15	2	LUAD,KIRP
ENSG00000280186.1.vs.ENSG00000085491.14	1	KIRC
ENSG00000149483.10.vs.ENSG00000162144.8	4	PRAD,BLCA,HNSC,THCA
ENSG00000176410.7.vs.ENSG00000071462.10	2	LUAD,COAD
ENSG00000275944.1.vs.ENSG00000275718.1	2	LUAD,COAD
ENSG00000106591.3.vs.ENSG00000106588.9	3	STAD,PRAD,UCEC
ENSG00000248898.1.vs.ENSG00000213949.7	2	STAD,BRCA
ENSG00000121104.6.vs.ENSG00000136504.10	2	BLCA,BRCA
ENSG00000100084.13.vs.ENSG00000185065.6	1	LUAD
ENSG00000266553.2.vs.ENSG00000243225.2	1	HNSC
ENSG00000240877.3.vs.ENSG00000197024.7	1	LUAD
ENSG00000176386.7.vs.ENSG00000136875.11	1	LUSC
ENSG00000167194.6.vs.ENSG00000149927.16	1	BRCA
ENSG00000226328.5.vs.ENSG00000093000.17	1	BRCA
ENSG00000204177.9.vs.ENSG00000265366.5	2	LUAD,BRCA
ENSG00000170100.12.vs.ENSG00000259877.2	1	HNSC
ENSG00000149089.11.vs.ENSG00000110435.10	2	LIHC,HNSC
ENSG00000182173.11.vs.ENSG00000177303.8	2	STAD,BLCA
ENSG00000146834.12.vs.ENSG00000078487.16	3	STAD,LUAD,THCA
ENSG00000157181.13.vs.ENSG00000047410.12	3	LIHC,LUAD,LUSC
ENSG00000217555.11.vs.ENSG00000166548.14	1	STAD
ENSG00000067167.6.vs.ENSG00000246366.5	3	STAD,LUAD,LUSC
ENSG00000251192.6.vs.ENSG00000230844.2	2	PRAD,BLCA
ENSG00000131668.12.vs.ENSG00000235601.1	1	HNSC
ENSG00000184378.2.vs.ENSG00000269889.1	2	KIRC,BRCA
ENSG00000138434.15.vs.ENSG00000260742.1	1	BLCA
ENSG00000054282.14.vs.ENSG00000143702.14	2	LUSC,THCA
ENSG00000184530.8.vs.ENSG00000214338.9	1	BRCA
ENSG00000145354.8.vs.ENSG00000109332.18	1	KIRC
ENSG00000117505.11.vs.ENSG00000223745.6	1	LUSC
ENSG00000279048.1.vs.ENSG00000071189.20	2	STAD,COAD
ENSG00000131355.13.vs.ENSG00000160961.10	2	LUAD,LUSC
ENSG00000185250.14.vs.ENSG00000135587.7	1	UCEC
ENSG00000177971.8.vs.ENSG00000173548.8	2	KIRC,BRCA
ENSG00000196655.8.vs.ENSG00000118181.9	2	LIHC,LUAD
ENSG00000260708.1.vs.ENSG00000054611.12	1	UCEC
ENSG00000228956.7.vs.ENSG00000131374.13	1	BRCA
ENSG00000130165.9.vs.ENSG00000198551.8	2	LUSC,BRCA
ENSG00000108733.8.vs.ENSG00000006125.15	3	LIHC,LUAD,BLCA
ENSG00000107937.17.vs.ENSG00000205740.2	1	HNSC
ENSG00000163312.9.vs.ENSG00000163319.9	1	LUSC
ENSG00000230084.4.vs.ENSG00000114853.12	2	LUSC,BLCA
ENSG00000237886.1.vs.ENSG00000148400.9	2	HNSC,KIRC
ENSG00000183291.14.vs.ENSG00000153936.15	1	LUSC
ENSG00000063177.11.vs.ENSG00000063176.14	2	LIHC,BRCA
ENSG00000166710.16.vs.ENSG00000229474.5	3	STAD,LUSC,BLCA
ENSG00000181038.12.vs.ENSG00000070495.13	1	BRCA
ENSG00000110074.9.vs.ENSG00000182934.10	2	LIHC,KIRC
ENSG00000116580.17.vs.ENSG00000132718.8	1	LUAD
ENSG00000137216.17.vs.ENSG00000180992.6	2	LUSC,BRCA
ENSG00000168591.14.vs.ENSG00000267080.4	3	PRAD,BLCA,KIRP
ENSG00000227933.1.vs.ENSG00000137101.11	1	BRCA
ENSG00000213066.10.vs.ENSG00000227598.1	2	LIHC,LUAD
ENSG00000183458.12.vs.ENSG00000258354.1	1	LUAD
ENSG00000260281.4.vs.ENSG00000171208.8	2	LUAD,BRCA
ENSG00000174165.6.vs.ENSG00000248746.4	1	HNSC
ENSG00000245571.5.vs.ENSG00000166801.14	3	LUSC,HNSC,KIRP
ENSG00000119711.11.vs.ENSG00000205659.9	1	COAD
ENSG00000257718.1.vs.ENSG00000139117.12	2	HNSC,KIRC
ENSG00000157540.18.vs.ENSG00000273210.1	2	STAD,BRCA
ENSG00000259488.2.vs.ENSG00000128951.12	2	LUSC,KIRC
ENSG00000100354.19.vs.ENSG00000261202.1	2	LUAD,BRCA
ENSG00000184060.9.vs.ENSG00000172171.9	2	KIRC,BRCA
ENSG00000163743.12.vs.ENSG00000174796.11	1	KIRP
ENSG00000261447.1.vs.ENSG00000107282.6	2	LUAD,PRAD
ENSG00000175606.9.vs.ENSG00000154582.15	3	LUAD,COAD,BRCA
ENSG00000159388.5.vs.ENSG00000233791.4	1	KIRC
ENSG00000147475.13.vs.ENSG00000183154.1	1	BLCA
ENSG00000141258.11.vs.ENSG00000167721.9	6	STAD,LUAD,LUSC,BLCA,KIRC,UCEC
ENSG00000197958.11.vs.ENSG00000148356.12	3	LUAD,BLCA,HNSC
ENSG00000229931.1.vs.ENSG00000124788.16	2	LIHC,PRAD
ENSG00000213713.3.vs.ENSG00000280798.1	4	STAD,BLCA,KIRP,BRCA
ENSG00000140400.13.vs.ENSG00000260274.1	2	HNSC,BRCA
ENSG00000136044.10.vs.ENSG00000235162.7	1	LIHC
ENSG00000247877.5.vs.ENSG00000174132.8	1	HNSC
ENSG00000185339.7.vs.ENSG00000100029.16	1	COAD
ENSG00000135535.13.vs.ENSG00000260273.1	1	KIRP
ENSG00000203441.2.vs.ENSG00000125304.8	3	LIHC,BLCA,BRCA
ENSG00000272841.1.vs.ENSG00000085511.18	1	LIHC
ENSG00000245614.3.vs.ENSG00000013573.15	1	PRAD
ENSG00000153140.7.vs.ENSG00000255647.3	1	KIRC
ENSG00000136986.8.vs.ENSG00000156787.15	2	LUSC,PRAD
ENSG00000214711.8.vs.ENSG00000013016.13	2	STAD,HNSC
ENSG00000163947.10.vs.ENSG00000272202.1	2	HNSC,THCA
ENSG00000235084.3.vs.ENSG00000237301.1	1	KIRC
ENSG00000267097.1.vs.ENSG00000266988.4	2	LUAD,PRAD
ENSG00000233785.1.vs.ENSG00000130066.15	1	LUAD
ENSG00000107551.19.vs.ENSG00000224812.2	1	BRCA
ENSG00000244515.1.vs.ENSG00000241770.1	3	PRAD,HNSC,KIRC
ENSG00000136490.7.vs.ENSG00000279369.1	2	LIHC,STAD
ENSG00000135336.13.vs.ENSG00000146282.16	1	PRAD
ENSG00000272081.1.vs.ENSG00000157107.12	2	LUAD,BRCA
ENSG00000164180.12.vs.ENSG00000247828.6	2	LUAD,UCEC
ENSG00000109436.7.vs.ENSG00000273472.1	3	LIHC,STAD,PRAD
ENSG00000254726.2.vs.ENSG00000160789.18	1	LUSC
ENSG00000179240.7.vs.ENSG00000137492.6	1	LUAD
ENSG00000185627.16.vs.ENSG00000142082.13	1	LUSC
ENSG00000088808.15.vs.ENSG00000258735.1	1	BRCA
ENSG00000232004.1.vs.ENSG00000198298.11	1	BRCA
ENSG00000167912.5.vs.ENSG00000198846.5	3	STAD,PRAD,KIRC
ENSG00000112992.15.vs.ENSG00000248092.6	2	COAD,UCEC
ENSG00000280417.1.vs.ENSG00000163935.12	2	LUAD,THCA
ENSG00000122026.9.vs.ENSG00000275294.3	1	KIRP
ENSG00000205155.6.vs.ENSG00000161265.13	1	LUAD
ENSG00000181827.13.vs.ENSG00000151575.13	1	LUSC
ENSG00000076944.13.vs.ENSG00000268204.1	1	LUSC
ENSG00000165572.7.vs.ENSG00000278390.3	1	HNSC
ENSG00000241666.2.vs.ENSG00000198771.9	2	BLCA,HNSC
ENSG00000126749.13.vs.ENSG00000215021.7	2	LUSC,BRCA
ENSG00000005483.18.vs.ENSG00000239569.3	1	COAD
ENSG00000101199.11.vs.ENSG00000101198.13	1	KIRP
ENSG00000205707.9.vs.ENSG00000118307.17	1	BRCA
ENSG00000143303.10.vs.ENSG00000143319.15	3	LIHC,LUAD,LUSC
ENSG00000168300.12.vs.ENSG00000228801.5	2	LUAD,BLCA
ENSG00000172116.20.vs.ENSG00000233673.5	1	KIRC
ENSG00000145194.16.vs.ENSG00000214160.8	2	PRAD,KIRC
ENSG00000186815.11.vs.ENSG00000166578.8	3	COAD,HNSC,UCEC
ENSG00000167113.9.vs.ENSG00000167112.9	5	LIHC,LUSC,HNSC,BRCA,UCEC
ENSG00000279528.1.vs.ENSG00000228343.1	2	STAD,THCA
ENSG00000205634.5.vs.ENSG00000224271.4	2	STAD,BRCA
ENSG00000124249.6.vs.ENSG00000244558.4	3	COAD,HNSC,BRCA
ENSG00000147684.6.vs.ENSG00000147687.15	3	LIHC,LUAD,COAD
ENSG00000151917.16.vs.ENSG00000151914.16	4	LIHC,STAD,LUSC,KIRC
ENSG00000174405.12.vs.ENSG00000139826.5	2	LUSC,HNSC
ENSG00000112983.16.vs.ENSG00000112984.10	4	LUAD,HNSC,BRCA,UCEC
ENSG00000050130.16.vs.ENSG00000126790.10	2	PRAD,BRCA
ENSG00000251687.1.vs.ENSG00000279481.1	1	BLCA
ENSG00000272980.3.vs.ENSG00000227598.1	2	LIHC,LUAD
ENSG00000262919.6.vs.ENSG00000260081.1	2	BLCA,COAD
ENSG00000273329.1.vs.ENSG00000106459.13	1	KIRC
ENSG00000233639.4.vs.ENSG00000269707.1	1	KIRP
ENSG00000178093.13.vs.ENSG00000258674.5	2	LUSC,COAD
ENSG00000032742.16.vs.ENSG00000277020.3	1	LIHC
ENSG00000114861.17.vs.ENSG00000270562.1	1	HNSC
ENSG00000276234.3.vs.ENSG00000278540.3	3	LUAD,BLCA,BRCA
ENSG00000261488.1.vs.ENSG00000174500.11	1	THCA
ENSG00000177600.7.vs.ENSG00000177595.16	2	LUSC,THCA
ENSG00000170270.4.vs.ENSG00000012963.12	3	COAD,KIRC,BRCA
ENSG00000213753.9.vs.ENSG00000099326.7	1	PRAD
ENSG00000228063.1.vs.ENSG00000143353.10	1	PRAD
ENSG00000169230.8.vs.ENSG00000169228.12	4	LUAD,HNSC,KIRC,BRCA
ENSG00000006459.9.vs.ENSG00000260231.1	3	LIHC,STAD,BLCA
ENSG00000159111.11.vs.ENSG00000141294.8	4	LIHC,STAD,LUAD,BLCA
ENSG00000236088.8.vs.ENSG00000006695.9	3	LIHC,COAD,BRCA
ENSG00000214293.7.vs.ENSG00000187257.13	3	STAD,LUAD,COAD
ENSG00000076201.13.vs.ENSG00000260236.1	1	STAD
ENSG00000129255.13.vs.ENSG00000233223.2	2	STAD,COAD
ENSG00000255856.2.vs.ENSG00000110987.7	1	KIRP
ENSG00000102572.13.vs.ENSG00000224418.1	1	BRCA
ENSG00000163481.6.vs.ENSG00000163482.10	2	LUAD,BLCA
ENSG00000278993.1.vs.ENSG00000111237.17	1	BLCA
ENSG00000080986.11.vs.ENSG00000101574.13	1	BLCA
ENSG00000160505.14.vs.ENSG00000179873.13	1	STAD
ENSG00000251611.1.vs.ENSG00000164142.14	1	THCA
ENSG00000105467.7.vs.ENSG00000161558.9	1	COAD
ENSG00000100014.18.vs.ENSG00000215464.4	1	PRAD
ENSG00000166260.9.vs.ENSG00000166263.12	2	PRAD,BLCA
ENSG00000184076.12.vs.ENSG00000100319.12	2	LUAD,COAD
ENSG00000166479.8.vs.ENSG00000150636.14	2	PRAD,KIRC
ENSG00000106565.16.vs.ENSG00000002933.6	2	STAD,UCEC
ENSG00000226819.1.vs.ENSG00000143995.18	1	HNSC
ENSG00000066557.5.vs.ENSG00000116754.12	2	LIHC,LUSC
ENSG00000090060.16.vs.ENSG00000260806.1	1	BRCA
ENSG00000267322.2.vs.ENSG00000167315.16	3	STAD,BLCA,COAD
ENSG00000078808.15.vs.ENSG00000176022.4	1	STAD
ENSG00000143373.16.vs.ENSG00000232671.4	2	STAD,UCEC
ENSG00000126890.13.vs.ENSG00000226141.1	1	STAD
ENSG00000267131.1.vs.ENSG00000121068.12	1	THCA
ENSG00000163840.8.vs.ENSG00000138496.15	5	STAD,LUSC,PRAD,KIRC,THCA
ENSG00000146776.13.vs.ENSG00000128536.14	4	LUAD,PRAD,COAD,UCEC
ENSG00000141569.9.vs.ENSG00000267342.1	2	KIRP,BRCA
ENSG00000141756.17.vs.ENSG00000141696.11	3	LIHC,HNSC,THCA
ENSG00000168575.8.vs.ENSG00000176209.10	1	LUAD
ENSG00000137434.10.vs.ENSG00000111845.4	1	COAD
ENSG00000248362.1.vs.ENSG00000251320.1	1	BRCA
ENSG00000117399.12.vs.ENSG00000234694.1	1	KIRC
ENSG00000138614.13.vs.ENSG00000074621.12	2	LIHC,BRCA
ENSG00000203684.5.vs.ENSG00000181873.11	1	BRCA
ENSG00000105676.12.vs.ENSG00000064607.15	3	LIHC,LUSC,BRCA
ENSG00000164694.15.vs.ENSG00000233682.3	5	LIHC,STAD,HNSC,BRCA,THCA
ENSG00000106299.7.vs.ENSG00000272686.1	4	LUAD,COAD,KIRC,THCA
ENSG00000141034.8.vs.ENSG00000171953.14	3	STAD,COAD,KIRC
ENSG00000186594.11.vs.ENSG00000167716.17	2	BLCA,KIRC
ENSG00000277597.1.vs.ENSG00000174231.15	1	STAD
ENSG00000123700.4.vs.ENSG00000267365.1	1	BRCA
ENSG00000247950.5.vs.ENSG00000138802.10	1	KIRP
ENSG00000213977.6.vs.ENSG00000127774.6	1	COAD
ENSG00000144648.13.vs.ENSG00000181061.12	1	KIRC
ENSG00000005073.5.vs.ENSG00000240990.8	1	LIHC
ENSG00000278677.1.vs.ENSG00000274641.1	2	COAD,KIRC
ENSG00000053372.4.vs.ENSG00000127463.12	1	PRAD
ENSG00000196363.8.vs.ENSG00000273249.1	5	LIHC,LUSC,COAD,HNSC,KIRC
ENSG00000164818.14.vs.ENSG00000188191.13	2	STAD,LUAD
ENSG00000255153.1.vs.ENSG00000078902.14	2	LUAD,LUSC
ENSG00000169031.17.vs.ENSG00000081052.11	3	STAD,BLCA,HNSC
ENSG00000119669.4.vs.ENSG00000273729.1	4	LUAD,PRAD,KIRC,BRCA
ENSG00000272043.1.vs.ENSG00000272384.1	2	LIHC,BRCA
ENSG00000235126.1.vs.ENSG00000237167.1	1	HNSC
ENSG00000160049.10.vs.ENSG00000142655.11	1	BRCA
ENSG00000254132.1.vs.ENSG00000251340.1	1	COAD
ENSG00000145545.10.vs.ENSG00000037474.13	1	LUSC
ENSG00000243414.5.vs.ENSG00000249249.1	1	KIRC
ENSG00000101187.14.vs.ENSG00000167046.4	1	BRCA
ENSG00000256646.6.vs.ENSG00000106591.3	1	PRAD
ENSG00000171492.13.vs.ENSG00000272931.1	1	KIRC
ENSG00000266389.1.vs.ENSG00000141506.12	1	LUAD
ENSG00000264569.1.vs.ENSG00000169738.6	1	STAD
ENSG00000167566.15.vs.ENSG00000258057.4	1	THCA
ENSG00000144580.12.vs.ENSG00000135913.9	1	LUAD
ENSG00000101997.11.vs.ENSG00000230216.1	1	HNSC
ENSG00000276728.1.vs.ENSG00000186834.3	2	BLCA,BRCA
ENSG00000132692.17.vs.ENSG00000272068.1	2	STAD,HNSC
ENSG00000214708.4.vs.ENSG00000126858.15	1	BRCA
ENSG00000274215.1.vs.ENSG00000258922.1	1	BRCA
ENSG00000271551.1.vs.ENSG00000049618.20	1	LUSC
ENSG00000137413.14.vs.ENSG00000112576.11	2	LIHC,BRCA
ENSG00000125445.9.vs.ENSG00000125447.15	3	STAD,KIRP,BRCA
ENSG00000144283.20.vs.ENSG00000153237.16	3	LIHC,BRCA,THCA
ENSG00000126814.6.vs.ENSG00000139974.14	1	BRCA
ENSG00000180626.9.vs.ENSG00000261879.4	2	STAD,COAD
ENSG00000183978.7.vs.ENSG00000176563.8	1	LUAD
ENSG00000105705.14.vs.ENSG00000129933.19	1	LIHC
ENSG00000141560.13.vs.ENSG00000263063.1	1	COAD
ENSG00000277268.1.vs.ENSG00000273706.3	4	LUAD,BLCA,COAD,KIRC
ENSG00000088836.11.vs.ENSG00000277287.1	2	PRAD,THCA
ENSG00000230679.1.vs.ENSG00000236269.1	1	HNSC
ENSG00000204525.13.vs.ENSG00000271581.1	5	LUAD,LUSC,PRAD,BRCA,UCEC
ENSG00000153832.10.vs.ENSG00000153827.12	2	BLCA,UCEC
ENSG00000266865.5.vs.ENSG00000264148.1	3	PRAD,KIRC,BRCA
ENSG00000237870.5.vs.ENSG00000105971.13	1	STAD
ENSG00000232485.2.vs.ENSG00000197756.8	1	BLCA
ENSG00000101193.7.vs.ENSG00000101191.15	2	LUSC,BRCA
ENSG00000116133.10.vs.ENSG00000242396.1	3	STAD,HNSC,THCA
ENSG00000030419.15.vs.ENSG00000270659.1	3	LIHC,STAD,KIRC
ENSG00000241288.6.vs.ENSG00000171084.14	2	STAD,KIRC
ENSG00000136738.13.vs.ENSG00000260589.1	1	UCEC
ENSG00000109736.13.vs.ENSG00000249673.5	1	KIRP
ENSG00000132773.10.vs.ENSG00000132781.16	2	BRCA,THCA
ENSG00000253944.1.vs.ENSG00000129422.12	2	LIHC,STAD
ENSG00000103197.15.vs.ENSG00000065057.6	2	BRCA,UCEC
ENSG00000266983.1.vs.ENSG00000031823.13	3	LIHC,LUSC,THCA
ENSG00000260603.1.vs.ENSG00000270385.1	1	LIHC
ENSG00000269293.2.vs.ENSG00000261839.1	3	STAD,BRCA,THCA
ENSG00000280079.1.vs.ENSG00000271524.1	2	HNSC,BRCA
ENSG00000112282.16.vs.ENSG00000154269.13	1	LIHC
ENSG00000171729.12.vs.ENSG00000175147.10	2	PRAD,THCA
ENSG00000099995.17.vs.ENSG00000187860.9	2	KIRP,UCEC
ENSG00000101246.18.vs.ENSG00000273154.2	1	KIRC
ENSG00000248932.4.vs.ENSG00000184432.8	1	HNSC
ENSG00000011426.9.vs.ENSG00000164542.11	1	COAD
ENSG00000186010.17.vs.ENSG00000178093.13	1	THCA
ENSG00000103174.10.vs.ENSG00000033011.10	2	BRCA,UCEC
ENSG00000188690.11.vs.ENSG00000107949.15	2	BRCA,UCEC
ENSG00000147677.9.vs.ENSG00000147679.10	4	STAD,LUAD,COAD,UCEC
ENSG00000182154.7.vs.ENSG00000130653.14	2	LIHC,HNSC
ENSG00000178222.11.vs.ENSG00000251652.1	2	STAD,HNSC
ENSG00000278952.1.vs.ENSG00000174276.6	1	BLCA
ENSG00000251602.5.vs.ENSG00000182979.16	2	STAD,BRCA
ENSG00000261408.4.vs.ENSG00000161533.10	3	STAD,KIRP,THCA
ENSG00000197563.8.vs.ENSG00000134444.12	1	KIRP
ENSG00000166411.12.vs.ENSG00000136425.11	2	KIRC,BRCA
ENSG00000260101.1.vs.ENSG00000119844.13	1	KIRC
ENSG00000269399.2.vs.ENSG00000085872.13	2	LUSC,COAD
ENSG00000179528.14.vs.ENSG00000257702.3	1	PRAD
[truncated: 195 more rows]

## Sheet: BG-up_vs_down
gene pair	number of TCGA datasets	TCGA datasets
ENSG00000106617.12.vs.ENSG00000239911.2	1	KIRP
ENSG00000182117.5.vs.ENSG00000184507.14	1	COAD
ENSG00000148943.10.vs.ENSG00000245573.6	1	LUSC
ENSG00000115758.11.vs.ENSG00000257135.4	1	LUAD
ENSG00000062716.9.vs.ENSG00000141378.14	1	LUAD
ENSG00000168237.16.vs.ENSG00000164091.10	1	PRAD
ENSG00000138085.15.vs.ENSG00000138074.13	1	LIHC
ENSG00000136378.13.vs.ENSG00000185787.13	1	BRCA
ENSG00000149599.14.vs.ENSG00000131044.15	2	PRAD,UCEC
ENSG00000095794.18.vs.ENSG00000230534.5	1	KIRC
ENSG00000166478.8.vs.ENSG00000268403.2	2	BRCA,UCEC
ENSG00000181418.7.vs.ENSG00000257913.2	1	HNSC
ENSG00000025434.17.vs.ENSG00000134575.8	1	BLCA
ENSG00000197128.10.vs.ENSG00000268266.1	1	PRAD
ENSG00000269959.1.vs.ENSG00000182310.11	2	PRAD,BRCA
ENSG00000260572.1.vs.ENSG00000163590.12	1	PRAD
ENSG00000114784.3.vs.ENSG00000280739.1	1	LUAD
ENSG00000154479.11.vs.ENSG00000213160.8	1	KIRC
ENSG00000160551.8.vs.ENSG00000264808.1	1	COAD
ENSG00000227252.1.vs.ENSG00000198612.9	1	LUAD
ENSG00000235501.4.vs.ENSG00000117519.14	1	LUAD
ENSG00000117593.9.vs.ENSG00000120334.14	1	BRCA
ENSG00000178971.12.vs.ENSG00000178921.12	1	LIHC
ENSG00000169221.12.vs.ENSG00000180209.10	1	PRAD
ENSG00000109814.10.vs.ENSG00000249348.1	1	COAD
ENSG00000180822.10.vs.ENSG00000137285.9	1	COAD
ENSG00000275180.1.vs.ENSG00000221949.5	1	LUAD
ENSG00000114767.6.vs.ENSG00000041880.13	1	BRCA
ENSG00000180185.10.vs.ENSG00000063854.11	1	HNSC
ENSG00000100601.8.vs.ENSG00000119705.8	1	COAD
ENSG00000082258.11.vs.ENSG00000224043.6	1	PRAD
ENSG00000246740.2.vs.ENSG00000103966.8	1	BRCA
ENSG00000235706.6.vs.ENSG00000100697.13	1	COAD
ENSG00000109832.11.vs.ENSG00000110060.7	1	BRCA
ENSG00000255257.1.vs.ENSG00000132256.17	1	STAD
ENSG00000093010.10.vs.ENSG00000184470.18	1	STAD
ENSG00000074935.12.vs.ENSG00000203778.6	2	HNSC,THCA
ENSG00000168826.14.vs.ENSG00000145220.12	1	STAD
ENSG00000260552.1.vs.ENSG00000075643.5	1	KIRC
ENSG00000160298.16.vs.ENSG00000160299.15	1	HNSC
ENSG00000160446.17.vs.ENSG00000223478.1	1	PRAD
ENSG00000255992.1.vs.ENSG00000177192.12	1	COAD
ENSG00000262089.1.vs.ENSG00000108839.10	1	BLCA
ENSG00000255717.5.vs.ENSG00000168003.15	2	STAD,KIRP
ENSG00000135211.5.vs.ENSG00000006576.15	1	LUAD
ENSG00000262050.1.vs.ENSG00000132361.15	2	HNSC,UCEC
ENSG00000105479.14.vs.ENSG00000142227.9	1	STAD
ENSG00000139637.12.vs.ENSG00000257605.2	1	KIRC
ENSG00000198952.8.vs.ENSG00000163472.17	1	LUSC
ENSG00000233360.4.vs.ENSG00000241360.1	2	STAD,PRAD
ENSG00000111897.6.vs.ENSG00000279114.1	1	LUAD
ENSG00000202198.1.vs.ENSG00000170899.9	1	PRAD
ENSG00000074855.9.vs.ENSG00000130299.15	1	KIRC
ENSG00000152117.16.vs.ENSG00000173272.12	2	LIHC,LUAD
ENSG00000197181.10.vs.ENSG00000254064.1	2	COAD,THCA
ENSG00000078369.16.vs.ENSG00000231050.1	1	LUAD
ENSG00000111785.17.vs.ENSG00000257545.3	1	STAD
ENSG00000167552.12.vs.ENSG00000167553.13	1	BLCA
ENSG00000277449.1.vs.ENSG00000172216.5	1	UCEC
ENSG00000170634.11.vs.ENSG00000068878.13	2	PRAD,COAD
ENSG00000139496.14.vs.ENSG00000260509.2	1	LUSC
ENSG00000127220.5.vs.ENSG00000130311.9	1	STAD
ENSG00000185015.6.vs.ENSG00000176731.10	1	BRCA
ENSG00000103363.13.vs.ENSG00000276791.1	1	COAD
ENSG00000165511.6.vs.ENSG00000165512.4	1	BRCA
ENSG00000131473.15.vs.ENSG00000204815.7	1	KIRP
ENSG00000167595.13.vs.ENSG00000004776.10	2	LUAD,HNSC
ENSG00000260793.2.vs.ENSG00000108312.13	1	KIRP
ENSG00000254685.5.vs.ENSG00000162620.14	1	BRCA
ENSG00000160439.14.vs.ENSG00000131037.13	1	PRAD
ENSG00000185437.12.vs.ENSG00000157578.12	1	BRCA
ENSG00000279035.1.vs.ENSG00000125458.5	1	PRAD
ENSG00000142207.6.vs.ENSG00000256073.3	1	COAD
ENSG00000074800.12.vs.ENSG00000230679.1	1	LUAD
ENSG00000280710.1.vs.ENSG00000280734.1	1	STAD
ENSG00000204257.13.vs.ENSG00000204256.11	1	LUSC
ENSG00000235897.1.vs.ENSG00000213123.9	1	LUSC
ENSG00000131462.6.vs.ENSG00000141699.9	1	LIHC
ENSG00000255292.5.vs.ENSG00000150779.10	1	COAD
ENSG00000132141.12.vs.ENSG00000005156.10	1	UCEC
ENSG00000143630.8.vs.ENSG00000176444.17	1	COAD
ENSG00000205544.3.vs.ENSG00000169992.8	1	LUAD
ENSG00000183208.11.vs.ENSG00000185043.9	1	PRAD
ENSG00000158955.9.vs.ENSG00000108379.8	1	BRCA
ENSG00000145293.13.vs.ENSG00000152795.16	1	LUAD
ENSG00000179523.4.vs.ENSG00000104131.11	1	COAD
ENSG00000230753.4.vs.ENSG00000101421.3	1	KIRP
ENSG00000139266.5.vs.ENSG00000135446.15	1	BLCA
ENSG00000171045.13.vs.ENSG00000261693.1	1	STAD
ENSG00000177697.16.vs.ENSG00000255108.1	1	STAD
ENSG00000005513.9.vs.ENSG00000103227.17	1	STAD
ENSG00000104369.4.vs.ENSG00000104381.11	1	BRCA
ENSG00000110944.7.vs.ENSG00000135473.13	1	LIHC
ENSG00000110660.13.vs.ENSG00000179331.2	1	THCA
ENSG00000265660.1.vs.ENSG00000203499.9	1	PRAD
ENSG00000118096.6.vs.ENSG00000095139.12	2	LIHC,LUSC
ENSG00000064393.14.vs.ENSG00000059377.14	2	LIHC,STAD
ENSG00000267296.2.vs.ENSG00000245848.2	1	LIHC
ENSG00000185129.5.vs.ENSG00000245146.5	1	STAD
ENSG00000258457.4.vs.ENSG00000129474.14	1	BRCA
ENSG00000165182.9.vs.ENSG00000184831.12	1	LIHC
ENSG00000154479.11.vs.ENSG00000144362.10	1	LIHC
ENSG00000109775.9.vs.ENSG00000205129.7	1	LUSC
ENSG00000105991.7.vs.ENSG00000233429.8	1	PRAD
ENSG00000139546.9.vs.ENSG00000139625.11	1	KIRC
ENSG00000186952.13.vs.ENSG00000164209.15	1	LUAD
ENSG00000226853.2.vs.ENSG00000163328.12	2	LUSC,PRAD
ENSG00000040487.11.vs.ENSG00000053371.11	3	LIHC,KIRC,BRCA
ENSG00000103248.16.vs.ENSG00000280278.1	1	STAD
ENSG00000272948.2.vs.ENSG00000157538.12	1	KIRC
ENSG00000183476.11.vs.ENSG00000167202.10	1	STAD
ENSG00000281832.1.vs.ENSG00000112541.12	1	KIRP
ENSG00000204370.7.vs.ENSG00000150779.10	1	COAD
ENSG00000170909.12.vs.ENSG00000170906.14	1	LIHC
ENSG00000114942.12.vs.ENSG00000023228.12	1	HNSC
ENSG00000198799.10.vs.ENSG00000238198.1	1	STAD
ENSG00000132000.10.vs.ENSG00000132017.9	2	LIHC,BRCA
ENSG00000168556.6.vs.ENSG00000232648.3	1	LUAD
ENSG00000165699.12.vs.ENSG00000165702.11	1	HNSC
ENSG00000257122.4.vs.ENSG00000237296.8	1	COAD
ENSG00000248898.1.vs.ENSG00000152684.10	1	HNSC
ENSG00000161011.18.vs.ENSG00000161013.15	2	HNSC,KIRC
ENSG00000214309.4.vs.ENSG00000242798.1	1	LUAD
ENSG00000095321.15.vs.ENSG00000119383.18	1	LUSC
ENSG00000120370.11.vs.ENSG00000231407.4	1	STAD
ENSG00000171453.16.vs.ENSG00000204052.4	1	PRAD
ENSG00000145012.11.vs.ENSG00000270959.1	1	STAD
ENSG00000114779.18.vs.ENSG00000243989.6	2	LIHC,COAD
ENSG00000205559.3.vs.ENSG00000254413.7	1	LUAD
ENSG00000118855.17.vs.ENSG00000118849.8	1	LIHC
ENSG00000171148.12.vs.ENSG00000250151.8	1	LUAD
ENSG00000073331.16.vs.ENSG00000145365.10	3	STAD,HNSC,KIRC
ENSG00000139718.9.vs.ENSG00000139725.6	1	KIRP
ENSG00000271122.1.vs.ENSG00000122557.8	1	STAD
ENSG00000158092.5.vs.ENSG00000239213.4	1	BRCA
ENSG00000117395.9.vs.ENSG00000179178.9	1	BLCA
ENSG00000278238.1.vs.ENSG00000136108.13	1	HNSC
ENSG00000213614.8.vs.ENSG00000260339.1	1	KIRC
ENSG00000174804.3.vs.ENSG00000246523.6	1	THCA
ENSG00000125457.12.vs.ENSG00000263843.1	1	STAD
ENSG00000225945.1.vs.ENSG00000156639.10	1	BRCA
ENSG00000160460.14.vs.ENSG00000090013.8	1	BRCA
ENSG00000064419.12.vs.ENSG00000230359.4	2	STAD,LUSC
ENSG00000111540.14.vs.ENSG00000185664.13	2	KIRP,BRCA
ENSG00000137996.11.vs.ENSG00000224616.1	1	LIHC
ENSG00000196810.4.vs.ENSG00000159692.14	1	LIHC
ENSG00000101745.14.vs.ENSG00000266053.2	1	HNSC
ENSG00000241224.5.vs.ENSG00000114487.8	1	STAD
ENSG00000139631.17.vs.ENSG00000139651.10	1	BRCA
ENSG00000177410.11.vs.ENSG00000124201.13	1	HNSC
ENSG00000255050.1.vs.ENSG00000204839.7	2	LUAD,BRCA
ENSG00000240225.9.vs.ENSG00000131848.8	1	BRCA
ENSG00000092020.9.vs.ENSG00000100890.14	1	LIHC
ENSG00000099256.17.vs.ENSG00000273107.1	1	LIHC
ENSG00000182871.13.vs.ENSG00000273796.1	1	BRCA
ENSG00000152147.9.vs.ENSG00000115875.17	2	LIHC,LUAD
ENSG00000154237.11.vs.ENSG00000259583.2	1	PRAD
ENSG00000128408.8.vs.ENSG00000077935.15	1	UCEC
ENSG00000166793.9.vs.ENSG00000172409.5	2	LUAD,HNSC
ENSG00000135018.12.vs.ENSG00000254473.1	1	LUAD
ENSG00000107938.16.vs.ENSG00000224023.9	1	STAD
ENSG00000257594.3.vs.ENSG00000270344.2	1	LIHC
ENSG00000162814.9.vs.ENSG00000092978.9	1	LUAD
ENSG00000187608.7.vs.ENSG00000188290.9	3	PRAD,HNSC,KIRP
ENSG00000104375.14.vs.ENSG00000271930.1	1	BRCA
ENSG00000234636.2.vs.ENSG00000180182.9	1	PRAD
ENSG00000230970.3.vs.ENSG00000010282.13	1	LUAD
ENSG00000113407.12.vs.ENSG00000249572.1	2	COAD,HNSC
ENSG00000267278.4.vs.ENSG00000233483.2	1	LUAD
ENSG00000112078.12.vs.ENSG00000179165.10	1	LUSC
ENSG00000183011.12.vs.ENSG00000170004.15	1	COAD
ENSG00000120820.11.vs.ENSG00000111727.10	1	BRCA
ENSG00000103326.9.vs.ENSG00000277142.1	1	LIHC
ENSG00000139352.3.vs.ENSG00000171759.7	1	BRCA
ENSG00000255517.5.vs.ENSG00000254986.6	1	COAD
ENSG00000198408.12.vs.ENSG00000226009.1	1	BRCA
ENSG00000111412.5.vs.ENSG00000135119.13	1	UCEC
ENSG00000270604.4.vs.ENSG00000204599.13	1	LIHC
ENSG00000258388.6.vs.ENSG00000204314.9	1	LUAD
ENSG00000143570.16.vs.ENSG00000143578.14	1	BRCA
ENSG00000237594.2.vs.ENSG00000156299.11	1	PRAD
ENSG00000131067.15.vs.ENSG00000131069.18	1	STAD
ENSG00000186510.10.vs.ENSG00000173641.16	2	STAD,HNSC
ENSG00000176261.14.vs.ENSG00000162521.17	1	COAD
ENSG00000176912.3.vs.ENSG00000176890.14	1	LUAD
ENSG00000237436.1.vs.ENSG00000171735.17	1	LUAD
ENSG00000118655.4.vs.ENSG00000134262.11	1	COAD
ENSG00000151135.8.vs.ENSG00000260329.1	1	UCEC
ENSG00000279968.1.vs.ENSG00000024862.15	1	BRCA
ENSG00000178882.12.vs.ENSG00000119242.7	1	STAD
ENSG00000163812.12.vs.ENSG00000075914.11	1	STAD
ENSG00000151694.11.vs.ENSG00000271855.1	1	KIRC
ENSG00000246130.1.vs.ENSG00000120889.11	1	LUAD
ENSG00000131653.11.vs.ENSG00000206630.1	1	STAD
ENSG00000180044.4.vs.ENSG00000244040.4	2	PRAD,THCA
ENSG00000116285.11.vs.ENSG00000238290.1	1	PRAD
ENSG00000103549.20.vs.ENSG00000196118.10	1	PRAD
ENSG00000171097.12.vs.ENSG00000136802.10	1	THCA
ENSG00000170448.10.vs.ENSG00000163293.10	2	STAD,THCA
ENSG00000133943.19.vs.ENSG00000100784.8	1	HNSC
ENSG00000235296.1.vs.ENSG00000183010.15	1	STAD
ENSG00000081087.13.vs.ENSG00000112333.10	1	STAD
ENSG00000214087.7.vs.ENSG00000185359.11	1	LIHC
ENSG00000247121.5.vs.ENSG00000113441.14	1	STAD
ENSG00000197417.7.vs.ENSG00000040531.13	1	LUSC
ENSG00000239617.1.vs.ENSG00000139537.9	1	LUAD
ENSG00000130701.3.vs.ENSG00000233017.2	1	BRCA
ENSG00000204335.3.vs.ENSG00000222033.1	1	LIHC
ENSG00000119688.19.vs.ENSG00000133980.4	1	HNSC
ENSG00000188223.9.vs.ENSG00000161265.13	1	BLCA
ENSG00000165794.8.vs.ENSG00000258471.1	1	LUAD
ENSG00000159761.13.vs.ENSG00000124074.10	1	LIHC
ENSG00000235277.1.vs.ENSG00000281903.1	1	BRCA
ENSG00000246145.1.vs.ENSG00000179041.3	1	STAD
ENSG00000204410.13.vs.ENSG00000213719.7	1	LIHC
ENSG00000051180.15.vs.ENSG00000245849.5	2	PRAD,HNSC
ENSG00000089847.11.vs.ENSG00000077463.13	1	STAD
ENSG00000135540.10.vs.ENSG00000225177.4	1	KIRC
ENSG00000279689.1.vs.ENSG00000196968.9	2	LIHC,STAD
ENSG00000099910.15.vs.ENSG00000099917.16	1	COAD
ENSG00000047365.10.vs.ENSG00000247193.2	1	HNSC
ENSG00000113712.15.vs.ENSG00000183111.10	2	LUAD,KIRC
ENSG00000179066.7.vs.ENSG00000227392.1	1	PRAD
ENSG00000252481.1.vs.ENSG00000182512.4	1	KIRP
ENSG00000245498.5.vs.ENSG00000120458.8	1	LIHC
ENSG00000162704.14.vs.ENSG00000143344.14	1	BRCA
ENSG00000173531.14.vs.ENSG00000164068.14	1	BRCA
ENSG00000166484.18.vs.ENSG00000108641.13	1	LUAD
ENSG00000143363.14.vs.ENSG00000143409.14	2	LIHC,BRCA
ENSG00000262904.1.vs.ENSG00000168411.12	1	STAD
ENSG00000235078.1.vs.ENSG00000182551.12	1	COAD
ENSG00000114209.13.vs.ENSG00000163536.11	1	KIRC
ENSG00000169762.15.vs.ENSG00000263327.5	1	HNSC
ENSG00000247137.7.vs.ENSG00000137494.12	1	LIHC
ENSG00000100288.18.vs.ENSG00000008735.13	1	KIRC
ENSG00000255198.4.vs.ENSG00000140988.14	1	BRCA
ENSG00000146955.9.vs.ENSG00000157800.16	1	LUSC
ENSG00000198133.7.vs.ENSG00000054690.12	1	KIRP
ENSG00000256196.1.vs.ENSG00000006118.13	1	BRCA
ENSG00000159733.12.vs.ENSG00000249428.4	1	BLCA
ENSG00000162385.9.vs.ENSG00000226754.1	1	LIHC
ENSG00000227220.1.vs.ENSG00000118523.5	2	LIHC,KIRC
ENSG00000268061.4.vs.ENSG00000118162.12	4	LUAD,COAD,BRCA,THCA
ENSG00000167900.10.vs.ENSG00000183077.14	1	KIRC
ENSG00000127980.14.vs.ENSG00000127993.13	1	BRCA
ENSG00000173207.11.vs.ENSG00000160691.17	1	KIRC
ENSG00000169442.7.vs.ENSG00000158062.19	4	LIHC,LUSC,KIRC,UCEC
ENSG00000186310.9.vs.ENSG00000179083.6	1	STAD
ENSG00000196419.11.vs.ENSG00000100418.7	1	LIHC
ENSG00000136450.11.vs.ENSG00000279069.1	1	LIHC
ENSG00000173171.13.vs.ENSG00000169231.12	2	LIHC,STAD
ENSG00000138175.8.vs.ENSG00000156398.11	2	STAD,THCA
ENSG00000179698.12.vs.ENSG00000179526.15	1	STAD
ENSG00000166452.10.vs.ENSG00000166444.16	1	LIHC
ENSG00000254788.5.vs.ENSG00000166548.14	1	KIRC
ENSG00000183576.11.vs.ENSG00000090061.16	1	PRAD
ENSG00000196227.9.vs.ENSG00000196074.11	3	LIHC,HNSC,BRCA
ENSG00000181222.13.vs.ENSG00000174282.10	1	LIHC
ENSG00000272386.1.vs.ENSG00000161544.8	1	KIRP
ENSG00000061794.11.vs.ENSG00000256377.4	1	BRCA
ENSG00000179134.13.vs.ENSG00000130755.11	2	LIHC,BLCA
ENSG00000185803.7.vs.ENSG00000261587.2	1	BRCA
ENSG00000242902.1.vs.ENSG00000128524.4	1	STAD
ENSG00000243701.4.vs.ENSG00000242759.5	1	LIHC
ENSG00000260260.1.vs.ENSG00000131653.11	1	STAD
ENSG00000163026.10.vs.ENSG00000119782.12	1	BRCA
ENSG00000160208.12.vs.ENSG00000160207.7	2	LIHC,BRCA
ENSG00000092841.17.vs.ENSG00000257809.1	1	LUAD
ENSG00000268603.1.vs.ENSG00000144591.16	1	PRAD
ENSG00000259736.1.vs.ENSG00000197299.9	1	LIHC
ENSG00000145476.14.vs.ENSG00000279943.1	1	STAD
ENSG00000167962.11.vs.ENSG00000183971.5	1	STAD
ENSG00000107796.11.vs.ENSG00000026103.18	2	COAD,HNSC
ENSG00000166135.12.vs.ENSG00000255339.5	1	LUAD
ENSG00000241343.8.vs.ENSG00000010671.14	2	STAD,LUAD
ENSG00000154174.7.vs.ENSG00000206535.6	1	BRCA
ENSG00000267523.1.vs.ENSG00000063245.13	1	KIRC
ENSG00000186660.14.vs.ENSG00000110031.11	1	COAD
ENSG00000166803.9.vs.ENSG00000103671.8	1	KIRC
ENSG00000114790.11.vs.ENSG00000243069.6	1	PRAD
ENSG00000257218.4.vs.ENSG00000170855.3	1	COAD
ENSG00000101290.12.vs.ENSG00000132646.9	1	KIRC
ENSG00000143179.11.vs.ENSG00000143183.15	1	LUAD
ENSG00000234006.1.vs.ENSG00000198563.12	1	LIHC
ENSG00000128886.10.vs.ENSG00000140264.18	1	COAD
ENSG00000161653.9.vs.ENSG00000131096.9	1	STAD
ENSG00000174917.7.vs.ENSG00000167733.12	1	STAD
ENSG00000169136.7.vs.ENSG00000104951.14	1	LIHC
ENSG00000136942.13.vs.ENSG00000136950.12	1	COAD
ENSG00000115255.9.vs.ENSG00000115257.14	1	BRCA
ENSG00000260288.3.vs.ENSG00000246877.1	1	LUSC
ENSG00000244879.4.vs.ENSG00000104064.15	1	LUSC
ENSG00000271270.4.vs.ENSG00000172765.15	1	BLCA
ENSG00000163463.10.vs.ENSG00000163462.16	1	LIHC
ENSG00000185267.8.vs.ENSG00000187522.12	1	LUAD
ENSG00000215271.7.vs.ENSG00000129473.8	1	PRAD
ENSG00000116299.15.vs.ENSG00000179902.11	1	KIRP
ENSG00000144554.9.vs.ENSG00000186162.9	1	KIRC
ENSG00000259349.1.vs.ENSG00000062725.8	1	KIRC
ENSG00000170310.13.vs.ENSG00000166596.13	3	PRAD,HNSC,KIRC
ENSG00000119203.12.vs.ENSG00000119185.11	1	BRCA
ENSG00000115840.12.vs.ENSG00000172878.12	2	LUSC,UCEC
ENSG00000272953.1.vs.ENSG00000182095.13	1	BRCA
ENSG00000213397.9.vs.ENSG00000182492.14	2	LIHC,PRAD
ENSG00000253948.1.vs.ENSG00000132549.17	1	LIHC
ENSG00000248898.1.vs.ENSG00000213949.7	1	KIRC
ENSG00000100084.13.vs.ENSG00000185065.6	1	BLCA
ENSG00000226328.5.vs.ENSG00000093000.17	2	STAD,THCA
ENSG00000170100.12.vs.ENSG00000259877.2	1	LUAD
ENSG00000182173.11.vs.ENSG00000177303.8	1	PRAD
ENSG00000260708.1.vs.ENSG00000054611.12	1	LIHC
ENSG00000063177.11.vs.ENSG00000063176.14	1	UCEC
ENSG00000181038.12.vs.ENSG00000070495.13	1	LUAD
ENSG00000116580.17.vs.ENSG00000132718.8	1	LIHC
ENSG00000164061.4.vs.ENSG00000226913.1	1	LIHC
ENSG00000185339.7.vs.ENSG00000100029.16	2	BRCA,UCEC
ENSG00000272841.1.vs.ENSG00000085511.18	1	STAD
ENSG00000107551.19.vs.ENSG00000224812.2	1	THCA
ENSG00000120656.10.vs.ENSG00000229388.1	1	BRCA
ENSG00000118197.12.vs.ENSG00000260088.1	1	PRAD
ENSG00000254726.2.vs.ENSG00000160789.18	4	STAD,PRAD,BLCA,THCA
ENSG00000122026.9.vs.ENSG00000275294.3	1	BRCA
ENSG00000205155.6.vs.ENSG00000161265.13	2	STAD,BLCA
ENSG00000181827.13.vs.ENSG00000151575.13	1	BRCA
ENSG00000241666.2.vs.ENSG00000198771.9	1	BRCA
ENSG00000267289.1.vs.ENSG00000127445.12	1	LUAD
ENSG00000219410.5.vs.ENSG00000111653.18	1	LIHC
ENSG00000005483.18.vs.ENSG00000239569.3	1	PRAD
ENSG00000205707.9.vs.ENSG00000118307.17	1	LIHC
ENSG00000186815.11.vs.ENSG00000166578.8	1	LIHC
ENSG00000178685.12.vs.ENSG00000186583.10	1	STAD
ENSG00000050130.16.vs.ENSG00000126790.10	1	LIHC
ENSG00000273329.1.vs.ENSG00000106459.13	1	HNSC
ENSG00000258790.1.vs.ENSG00000092020.9	1	LIHC
ENSG00000177600.7.vs.ENSG00000177595.16	2	LIHC,LUAD
ENSG00000105467.7.vs.ENSG00000161558.9	1	KIRP
ENSG00000272434.1.vs.ENSG00000178035.10	1	LIHC
ENSG00000166260.9.vs.ENSG00000166263.12	1	COAD
ENSG00000198836.7.vs.ENSG00000127249.13	1	THCA
ENSG00000141569.9.vs.ENSG00000267342.1	1	LIHC
ENSG00000203684.5.vs.ENSG00000181873.11	1	BLCA
ENSG00000240050.4.vs.ENSG00000189241.6	1	HNSC
ENSG00000213977.6.vs.ENSG00000127774.6	1	LIHC
ENSG00000264569.1.vs.ENSG00000169738.6	1	BRCA
ENSG00000167566.15.vs.ENSG00000258057.4	1	LIHC
ENSG00000101997.11.vs.ENSG00000230216.1	1	COAD
ENSG00000276728.1.vs.ENSG00000186834.3	1	COAD
ENSG00000132692.17.vs.ENSG00000272068.1	1	BRCA
ENSG00000183978.7.vs.ENSG00000176563.8	1	LUSC
ENSG00000230679.1.vs.ENSG00000236269.1	1	LUAD
ENSG00000153832.10.vs.ENSG00000153827.12	1	COAD
ENSG00000112282.16.vs.ENSG00000154269.13	1	COAD
ENSG00000099995.17.vs.ENSG00000187860.9	1	BRCA
ENSG00000278952.1.vs.ENSG00000174276.6	2	PRAD,UCEC
ENSG00000261408.4.vs.ENSG00000161533.10	2	LIHC,LUAD
ENSG00000185480.10.vs.ENSG00000075188.7	1	COAD
ENSG00000231890.6.vs.ENSG00000115866.9	1	STAD
ENSG00000106290.13.vs.ENSG00000166997.6	1	LIHC
ENSG00000109466.12.vs.ENSG00000170088.12	1	STAD
ENSG00000074755.13.vs.ENSG00000167740.8	1	LIHC
ENSG00000112855.13.vs.ENSG00000170445.11	1	LIHC
ENSG00000111481.8.vs.ENSG00000123405.12	1	PRAD
ENSG00000132259.11.vs.ENSG00000051009.9	1	LUAD
ENSG00000010361.12.vs.ENSG00000104973.13	1	LIHC
ENSG00000221949.5.vs.ENSG00000257354.2	1	LUAD
ENSG00000137807.12.vs.ENSG00000259426.4	1	UCEC
ENSG00000198270.11.vs.ENSG00000089248.6	1	STAD
ENSG00000113318.9.vs.ENSG00000228716.5	1	COAD
ENSG00000228544.1.vs.ENSG00000196642.14	2	STAD,UCEC
ENSG00000099953.8.vs.ENSG00000250479.7	1	BLCA
ENSG00000143149.11.vs.ENSG00000215838.4	1	BRCA
ENSG00000187189.10.vs.ENSG00000111817.15	1	STAD
ENSG00000177479.18.vs.ENSG00000221883.2	1	LUSC
ENSG00000132466.16.vs.ENSG00000250220.1	1	PRAD
ENSG00000154920.13.vs.ENSG00000108826.14	1	KIRC
ENSG00000281641.1.vs.ENSG00000177570.12	1	BRCA
ENSG00000076053.9.vs.ENSG00000180425.9	1	BRCA
ENSG00000164305.16.vs.ENSG00000164306.9	1	PRAD
ENSG00000134146.10.vs.ENSG00000248079.2	1	LUSC
ENSG00000179912.18.vs.ENSG00000258001.1	1	STAD
ENSG00000246308.1.vs.ENSG00000110321.14	1	COAD
ENSG00000072682.17.vs.ENSG00000197208.5	1	BLCA
ENSG00000144233.8.vs.ENSG00000272667.1	1	PRAD
ENSG00000186166.7.vs.ENSG00000255121.2	1	COAD
ENSG00000089220.4.vs.ENSG00000176834.12	2	LIHC,BRCA
ENSG00000126215.12.vs.ENSG00000100711.12	1	LIHC
ENSG00000272288.4.vs.ENSG00000196821.8	1	STAD
ENSG00000143612.17.vs.ENSG00000143569.17	1	BRCA
ENSG00000103061.10.vs.ENSG00000132600.15	1	BRCA
ENSG00000006638.10.vs.ENSG00000226800.5	1	LIHC
ENSG00000115761.14.vs.ENSG00000243819.4	1	HNSC
ENSG00000186522.13.vs.ENSG00000198142.4	1	COAD
ENSG00000267670.1.vs.ENSG00000104998.3	1	LIHC
ENSG00000114737.14.vs.ENSG00000114738.9	1	HNSC
ENSG00000224281.4.vs.ENSG00000005022.5	1	LUAD
ENSG00000260475.1.vs.ENSG00000155287.9	1	STAD
ENSG00000163412.11.vs.ENSG00000170837.2	1	THCA
ENSG00000119013.7.vs.ENSG00000155744.8	1	THCA
ENSG00000111271.13.vs.ENSG00000089234.14	1	HNSC
ENSG00000152292.15.vs.ENSG00000042493.14	1	STAD

## Sheet: CG1-up_vs_up+down_vs_down
gene pair	number of TCGA datasets	TCGA datasets
ENSG00000099957.15.vs.ENSG00000099960.11	1	KIRC
ENSG00000236830.5.vs.ENSG00000226054.2	1	BRCA
ENSG00000220848.4.vs.ENSG00000186625.12	1	LIHC
ENSG00000259780.3.vs.ENSG00000167967.14	1	UCEC
ENSG00000068137.13.vs.ENSG00000037042.8	2	STAD,KIRP
ENSG00000157017.14.vs.ENSG00000231177.4	1	BLCA
ENSG00000172354.8.vs.ENSG00000146830.9	1	COAD
ENSG00000166171.11.vs.ENSG00000107829.12	2	STAD,BLCA
ENSG00000249751.3.vs.ENSG00000200378.1	1	KIRC
ENSG00000127564.15.vs.ENSG00000131650.12	4	LUSC,KIRC,BRCA,UCEC
ENSG00000108788.10.vs.ENSG00000131470.13	1	BRCA
ENSG00000239264.7.vs.ENSG00000153162.8	1	STAD
ENSG00000179886.5.vs.ENSG00000104524.12	3	LIHC,LUAD,KIRC
ENSG00000236675.1.vs.ENSG00000177628.14	2	LUAD,UCEC
ENSG00000101460.11.vs.ENSG00000101464.9	1	STAD
ENSG00000266171.1.vs.ENSG00000264635.1	4	LUAD,LUSC,PRAD,KIRP
ENSG00000122034.11.vs.ENSG00000122033.13	1	STAD
ENSG00000213822.6.vs.ENSG00000254521.5	1	STAD
ENSG00000204421.2.vs.ENSG00000250641.1	2	BLCA,COAD
ENSG00000137575.10.vs.ENSG00000035681.6	2	PRAD,COAD
ENSG00000167106.10.vs.ENSG00000227218.6	3	LIHC,THCA,UCEC
ENSG00000167468.15.vs.ENSG00000064932.14	2	LUSC,UCEC
ENSG00000143952.18.vs.ENSG00000169764.13	1	HNSC
ENSG00000101084.15.vs.ENSG00000101082.12	3	BLCA,HNSC,THCA
ENSG00000130734.8.vs.ENSG00000129347.18	2	LIHC,LUSC
ENSG00000188092.13.vs.ENSG00000215859.7	4	LIHC,LUAD,LUSC,UCEC
ENSG00000124574.13.vs.ENSG00000171462.13	1	PRAD
ENSG00000234575.1.vs.ENSG00000233884.1	2	LUAD,LUSC
ENSG00000184956.14.vs.ENSG00000183020.12	1	BLCA
ENSG00000137200.11.vs.ENSG00000198937.8	2	PRAD,BRCA
ENSG00000099822.2.vs.ENSG00000099821.12	1	LUSC
ENSG00000169583.12.vs.ENSG00000148362.9	2	LUSC,KIRC
ENSG00000213071.9.vs.ENSG00000146477.5	3	LIHC,STAD,LUAD
ENSG00000161091.11.vs.ENSG00000105325.12	1	LUSC
ENSG00000279208.1.vs.ENSG00000278932.2	1	STAD
ENSG00000130758.6.vs.ENSG00000174521.7	3	LIHC,PRAD,BRCA
ENSG00000128346.9.vs.ENSG00000100139.12	5	LUAD,BLCA,HNSC,BRCA,UCEC
ENSG00000267744.1.vs.ENSG00000164729.7	1	LUSC
ENSG00000159374.16.vs.ENSG00000115325.12	1	LIHC
ENSG00000188229.5.vs.ENSG00000188163.7	1	LIHC
ENSG00000013306.14.vs.ENSG00000108309.11	1	BLCA
ENSG00000185614.4.vs.ENSG00000182179.9	2	PRAD,BLCA
ENSG00000130714.14.vs.ENSG00000130717.11	2	COAD,BRCA
ENSG00000168802.11.vs.ENSG00000103044.9	1	BRCA
ENSG00000072518.19.vs.ENSG00000167771.5	1	BLCA
ENSG00000162892.14.vs.ENSG00000162894.10	1	LIHC
ENSG00000227473.1.vs.ENSG00000235173.5	2	STAD,BRCA
ENSG00000256028.2.vs.ENSG00000090975.11	2	LIHC,BLCA
ENSG00000168256.16.vs.ENSG00000187595.13	1	BLCA
ENSG00000162976.11.vs.ENSG00000134318.12	1	STAD
ENSG00000196405.11.vs.ENSG00000168350.7	1	KIRP
ENSG00000142208.14.vs.ENSG00000184990.11	3	LIHC,HNSC,BRCA
ENSG00000105856.12.vs.ENSG00000164597.12	2	LIHC,COAD
ENSG00000168427.8.vs.ENSG00000279484.1	3	LUSC,HNSC,KIRP
ENSG00000178028.12.vs.ENSG00000117419.13	1	BRCA
ENSG00000160326.12.vs.ENSG00000160325.13	1	LUSC
ENSG00000171262.10.vs.ENSG00000172575.10	2	LIHC,LUSC
ENSG00000254404.1.vs.ENSG00000124939.5	1	BRCA
ENSG00000251603.1.vs.ENSG00000059691.10	2	KIRC,BRCA
ENSG00000108592.15.vs.ENSG00000198231.11	3	STAD,LUAD,BRCA
ENSG00000101343.13.vs.ENSG00000173418.10	4	STAD,HNSC,KIRC,KIRP
ENSG00000185507.18.vs.ENSG00000070047.10	4	LUSC,BLCA,HNSC,THCA
ENSG00000072163.17.vs.ENSG00000169994.17	6	STAD,PRAD,COAD,KIRP,BRCA,THCA
ENSG00000145715.13.vs.ENSG00000134480.12	2	LUAD,HNSC
ENSG00000205643.9.vs.ENSG00000186951.15	1	LUSC
ENSG00000280311.1.vs.ENSG00000187848.11	2	LIHC,STAD
ENSG00000187959.8.vs.ENSG00000141219.14	2	STAD,BRCA
ENSG00000106123.10.vs.ENSG00000165125.16	3	LUSC,KIRC,THCA
ENSG00000198026.7.vs.ENSG00000100982.10	1	PRAD
ENSG00000196562.13.vs.ENSG00000124151.17	1	LIHC
ENSG00000280213.1.vs.ENSG00000196700.6	2	LIHC,BLCA
ENSG00000149970.13.vs.ENSG00000185915.5	2	PRAD,KIRP
ENSG00000196497.14.vs.ENSG00000100918.11	1	COAD
ENSG00000258405.8.vs.ENSG00000269349.1	2	KIRC,KIRP
ENSG00000178460.16.vs.ENSG00000245910.7	5	STAD,LUAD,KIRP,BRCA,UCEC
ENSG00000101190.11.vs.ENSG00000092758.14	3	LUAD,KIRP,BRCA
ENSG00000253369.1.vs.ENSG00000274295.1	2	LUSC,BRCA
ENSG00000158008.8.vs.ENSG00000158014.13	4	LIHC,LUAD,THCA,UCEC
ENSG00000183798.4.vs.ENSG00000132793.10	1	HNSC
ENSG00000266402.3.vs.ENSG00000136478.6	1	KIRP
ENSG00000145386.8.vs.ENSG00000123737.11	3	STAD,LUSC,UCEC
ENSG00000108604.14.vs.ENSG00000087191.11	5	LUAD,LUSC,BLCA,KIRP,BRCA
ENSG00000164902.12.vs.ENSG00000230929.5	2	LIHC,BRCA
ENSG00000250979.1.vs.ENSG00000253317.1	1	STAD
ENSG00000198931.9.vs.ENSG00000167513.7	4	LUAD,LUSC,PRAD,KIRC
ENSG00000198089.13.vs.ENSG00000241878.8	1	BRCA
ENSG00000238178.5.vs.ENSG00000126010.5	4	STAD,PRAD,BLCA,UCEC
ENSG00000197746.12.vs.ENSG00000107736.18	1	KIRC
ENSG00000267074.1.vs.ENSG00000267369.1	3	LUSC,BLCA,HNSC
ENSG00000157077.13.vs.ENSG00000154222.13	1	BRCA
ENSG00000210196.2.vs.ENSG00000210195.2	1	KIRC
ENSG00000272203.1.vs.ENSG00000198944.5	1	PRAD
ENSG00000187634.9.vs.ENSG00000188976.9	1	HNSC
ENSG00000223802.6.vs.ENSG00000005007.11	1	LUSC
ENSG00000130826.14.vs.ENSG00000130830.13	3	STAD,BLCA,HNSC
ENSG00000099800.6.vs.ENSG00000178297.11	1	KIRP
ENSG00000149182.13.vs.ENSG00000149179.12	3	LUSC,BLCA,HNSC
ENSG00000221869.4.vs.ENSG00000164808.15	1	UCEC
ENSG00000143318.11.vs.ENSG00000227741.1	2	LUAD,PRAD
ENSG00000274363.1.vs.ENSG00000132388.11	2	STAD,BRCA
ENSG00000123329.16.vs.ENSG00000111087.8	1	LIHC
ENSG00000229939.1.vs.ENSG00000225031.1	1	LIHC
ENSG00000137267.5.vs.ENSG00000137274.11	1	LUSC
ENSG00000163382.10.vs.ENSG00000160818.15	2	LUSC,KIRC
ENSG00000108262.14.vs.ENSG00000167543.14	1	BRCA
ENSG00000099377.12.vs.ENSG00000099365.8	4	STAD,COAD,BRCA,UCEC
ENSG00000225872.2.vs.ENSG00000004777.17	2	LIHC,STAD
ENSG00000130811.9.vs.ENSG00000244165.1	1	LUSC
ENSG00000135749.17.vs.ENSG00000135778.10	1	BRCA
ENSG00000170779.10.vs.ENSG00000140104.12	1	BRCA
ENSG00000099797.10.vs.ENSG00000099795.5	3	LIHC,LUSC,THCA
ENSG00000188486.3.vs.ENSG00000256269.5	2	LUAD,THCA
ENSG00000185519.8.vs.ENSG00000184908.16	1	HNSC
ENSG00000106346.10.vs.ENSG00000008256.14	2	LUSC,COAD
ENSG00000167969.11.vs.ENSG00000167968.11	3	LUSC,KIRC,UCEC
ENSG00000124541.6.vs.ENSG00000272223.1	1	LIHC
ENSG00000234776.3.vs.ENSG00000121653.10	2	BLCA,THCA
ENSG00000204165.5.vs.ENSG00000184481.15	1	HNSC
ENSG00000101003.9.vs.ENSG00000101004.13	1	PRAD
ENSG00000151366.11.vs.ENSG00000151365.2	1	THCA
ENSG00000102109.8.vs.ENSG00000187682.1	1	KIRC
ENSG00000179564.3.vs.ENSG00000214706.9	2	LUSC,PRAD
ENSG00000104859.13.vs.ENSG00000170684.7	1	BRCA
ENSG00000184709.7.vs.ENSG00000176884.13	1	BLCA
ENSG00000239779.5.vs.ENSG00000115275.10	2	STAD,BRCA
ENSG00000163938.15.vs.ENSG00000016864.15	4	STAD,LUSC,BLCA,HNSC
ENSG00000107874.9.vs.ENSG00000107872.11	1	UCEC
ENSG00000144746.6.vs.ENSG00000163380.14	1	STAD
ENSG00000108840.14.vs.ENSG00000141349.7	4	LIHC,BLCA,COAD,KIRC
ENSG00000279332.1.vs.ENSG00000168234.11	2	LIHC,COAD
ENSG00000270947.1.vs.ENSG00000268717.1	3	BLCA,BRCA,THCA
ENSG00000096384.18.vs.ENSG00000157593.15	4	LIHC,STAD,BRCA,UCEC
ENSG00000081181.6.vs.ENSG00000258626.2	1	KIRC
ENSG00000279117.1.vs.ENSG00000254429.1	2	PRAD,KIRC
ENSG00000206561.11.vs.ENSG00000144597.12	2	STAD,LUAD
ENSG00000272689.1.vs.ENSG00000273350.1	1	LUAD
ENSG00000110711.8.vs.ENSG00000110697.11	1	HNSC
ENSG00000162885.11.vs.ENSG00000116957.11	3	LUSC,KIRC,BRCA
ENSG00000259040.4.vs.ENSG00000153162.8	1	PRAD
ENSG00000143382.12.vs.ENSG00000203804.4	2	LUAD,LUSC
ENSG00000118997.12.vs.ENSG00000196950.12	2	LIHC,BLCA
ENSG00000125257.12.vs.ENSG00000252335.1	1	KIRC
ENSG00000204564.10.vs.ENSG00000204560.8	3	LUSC,HNSC,BRCA
ENSG00000166313.17.vs.ENSG00000166311.8	1	LUSC
ENSG00000280743.1.vs.ENSG00000238391.1	1	STAD
ENSG00000072778.18.vs.ENSG00000004975.10	1	LUSC
ENSG00000254814.1.vs.ENSG00000062282.13	4	LIHC,BLCA,COAD,HNSC
ENSG00000125355.14.vs.ENSG00000177485.6	2	HNSC,THCA
ENSG00000131236.15.vs.ENSG00000131238.15	2	LIHC,BRCA
ENSG00000106077.17.vs.ENSG00000225969.1	3	LIHC,STAD,LUAD
ENSG00000261659.2.vs.ENSG00000127585.10	2	PRAD,BRCA
ENSG00000149923.12.vs.ENSG00000149922.9	1	BRCA
ENSG00000124587.12.vs.ENSG00000124713.5	2	PRAD,BRCA
ENSG00000141564.12.vs.ENSG00000261924.1	1	BRCA
ENSG00000172613.6.vs.ENSG00000172531.13	1	HNSC
ENSG00000170085.16.vs.ENSG00000122203.13	2	LUAD,COAD
ENSG00000121053.5.vs.ENSG00000011143.15	2	STAD,HNSC
ENSG00000214655.9.vs.ENSG00000166507.15	1	BRCA
ENSG00000167644.10.vs.ENSG00000167645.15	1	HNSC
ENSG00000107404.16.vs.ENSG00000169962.4	4	LIHC,LUSC,COAD,HNSC
ENSG00000143442.20.vs.ENSG00000159377.9	3	LIHC,LUAD,UCEC
ENSG00000140093.8.vs.ENSG00000119698.10	3	STAD,BRCA,UCEC
ENSG00000004487.14.vs.ENSG00000169641.12	1	BRCA
ENSG00000228278.3.vs.ENSG00000106948.15	2	BLCA,THCA
ENSG00000126247.9.vs.ENSG00000161281.9	1	STAD
ENSG00000279810.1.vs.ENSG00000229720.1	1	KIRC
ENSG00000198208.10.vs.ENSG00000119689.13	1	BRCA
ENSG00000154945.6.vs.ENSG00000108846.14	1	LIHC
ENSG00000119522.14.vs.ENSG00000148204.10	2	LUSC,BLCA
ENSG00000213373.6.vs.ENSG00000260105.5	2	BLCA,THCA
ENSG00000125753.12.vs.ENSG00000125741.4	1	LUAD
ENSG00000064601.15.vs.ENSG00000100979.13	2	PRAD,KIRP
ENSG00000141744.3.vs.ENSG00000161395.11	3	BLCA,COAD,BRCA
ENSG00000170291.13.vs.ENSG00000181885.17	1	COAD
ENSG00000005059.14.vs.ENSG00000138794.8	2	PRAD,KIRP
ENSG00000155850.7.vs.ENSG00000164296.6	1	HNSC
ENSG00000269514.1.vs.ENSG00000172640.3	1	LUSC
ENSG00000120784.14.vs.ENSG00000171817.15	1	BRCA
ENSG00000102302.7.vs.ENSG00000158526.7	1	BRCA
ENSG00000052344.14.vs.ENSG00000103510.18	1	BLCA
ENSG00000224066.1.vs.ENSG00000160050.13	1	STAD
ENSG00000269072.1.vs.ENSG00000168995.12	1	KIRC
ENSG00000184697.6.vs.ENSG00000213937.3	1	BLCA
ENSG00000273073.1.vs.ENSG00000232742.3	1	KIRC
ENSG00000166960.15.vs.ENSG00000263765.4	1	STAD
ENSG00000130811.9.vs.ENSG00000243207.5	1	UCEC
ENSG00000281386.1.vs.ENSG00000281097.1	1	HNSC
ENSG00000108963.16.vs.ENSG00000263050.1	3	STAD,LUSC,COAD
ENSG00000205702.9.vs.ENSG00000281538.1	2	LIHC,BRCA
ENSG00000136059.13.vs.ENSG00000187091.12	1	PRAD
ENSG00000163794.6.vs.ENSG00000138100.12	1	LUSC
ENSG00000206384.9.vs.ENSG00000196455.6	1	KIRC
ENSG00000139044.9.vs.ENSG00000171840.10	2	BRCA,THCA
ENSG00000258558.1.vs.ENSG00000092108.19	1	LUAD
ENSG00000140876.10.vs.ENSG00000261707.1	2	LUAD,THCA
ENSG00000237452.2.vs.ENSG00000177045.7	2	LUAD,COAD
ENSG00000183723.11.vs.ENSG00000140931.18	1	HNSC
ENSG00000211445.10.vs.ENSG00000145901.13	2	LUAD,UCEC
ENSG00000130813.16.vs.ENSG00000130812.9	1	BRCA
ENSG00000107902.12.vs.ENSG00000258539.1	1	LUAD
ENSG00000267506.4.vs.ENSG00000267466.1	1	STAD
ENSG00000262052.1.vs.ENSG00000141179.12	1	KIRC
ENSG00000163159.10.vs.ENSG00000163156.10	1	LUAD
ENSG00000139835.12.vs.ENSG00000185896.10	2	HNSC,BRCA
ENSG00000170382.10.vs.ENSG00000240710.1	1	THCA
ENSG00000112514.14.vs.ENSG00000112511.16	2	LUSC,BRCA
ENSG00000279322.1.vs.ENSG00000197586.11	2	STAD,COAD
ENSG00000120860.9.vs.ENSG00000136048.12	3	STAD,COAD,KIRP
ENSG00000008323.14.vs.ENSG00000067182.6	1	STAD
ENSG00000106628.9.vs.ENSG00000106624.7	1	BRCA
ENSG00000265912.1.vs.ENSG00000272006.1	1	LUAD
ENSG00000163703.16.vs.ENSG00000163704.10	2	STAD,HNSC
ENSG00000267484.1.vs.ENSG00000105355.7	3	STAD,THCA,UCEC
ENSG00000240288.6.vs.ENSG00000157020.16	1	LUSC
ENSG00000253755.1.vs.ENSG00000275301.1	1	STAD
ENSG00000251179.1.vs.ENSG00000167105.6	2	KIRP,THCA
ENSG00000260500.1.vs.ENSG00000260001.5	4	LUSC,PRAD,COAD,BRCA
ENSG00000187838.15.vs.ENSG00000174292.11	4	LUSC,BLCA,BRCA,UCEC
ENSG00000175130.6.vs.ENSG00000116478.10	1	LUAD
ENSG00000243960.1.vs.ENSG00000233337.1	2	LUAD,LUSC
ENSG00000134317.16.vs.ENSG00000188525.3	3	LIHC,STAD,THCA
ENSG00000248559.1.vs.ENSG00000237190.3	2	HNSC,BRCA
ENSG00000102007.9.vs.ENSG00000012211.11	2	STAD,PRAD
ENSG00000158483.14.vs.ENSG00000254978.2	2	LUAD,KIRC
ENSG00000204482.9.vs.ENSG00000204475.8	2	LIHC,BLCA
ENSG00000011009.9.vs.ENSG00000117308.13	4	LIHC,PRAD,COAD,HNSC
ENSG00000169258.6.vs.ENSG00000074276.9	2	STAD,BLCA
ENSG00000100239.14.vs.ENSG00000100241.19	4	LUAD,LUSC,PRAD,COAD
ENSG00000237101.1.vs.ENSG00000143748.16	2	LIHC,LUAD
ENSG00000148702.13.vs.ENSG00000197893.12	2	KIRC,KIRP
ENSG00000198517.8.vs.ENSG00000164855.14	1	HNSC
ENSG00000102710.18.vs.ENSG00000120699.11	1	LIHC
ENSG00000244038.8.vs.ENSG00000158828.5	1	BRCA
ENSG00000258819.1.vs.ENSG00000246548.3	1	PRAD
ENSG00000103126.13.vs.ENSG00000185615.14	1	BRCA
ENSG00000047579.18.vs.ENSG00000008083.12	2	KIRC,BRCA
ENSG00000100522.7.vs.ENSG00000198252.10	1	COAD
ENSG00000224961.1.vs.ENSG00000234900.1	1	STAD
ENSG00000176125.4.vs.ENSG00000087087.17	1	KIRC
ENSG00000125520.12.vs.ENSG00000130584.9	1	KIRP
ENSG00000177954.10.vs.ENSG00000143552.8	1	LUSC
ENSG00000076344.14.vs.ENSG00000167930.14	1	UCEC
ENSG00000234290.2.vs.ENSG00000202533.1	1	STAD
ENSG00000232271.1.vs.ENSG00000228888.1	1	KIRP
ENSG00000204791.7.vs.ENSG00000178814.14	1	BLCA
ENSG00000163697.15.vs.ENSG00000179299.15	1	BRCA
ENSG00000180279.5.vs.ENSG00000167748.9	1	THCA
ENSG00000169885.8.vs.ENSG00000178821.11	2	LIHC,STAD
ENSG00000130881.12.vs.ENSG00000130876.10	1	LUAD
ENSG00000123485.10.vs.ENSG00000185038.13	1	PRAD
ENSG00000227742.1.vs.ENSG00000227070.1	2	LIHC,LUAD
ENSG00000278978.1.vs.ENSG00000059691.10	3	LUAD,LUSC,BRCA
ENSG00000145244.10.vs.ENSG00000145246.12	2	HNSC,UCEC
ENSG00000180900.15.vs.ENSG00000214733.7	2	LUAD,LUSC
ENSG00000108602.16.vs.ENSG00000264785.1	2	STAD,UCEC
ENSG00000245317.2.vs.ENSG00000197226.11	1	BRCA
ENSG00000067829.17.vs.ENSG00000184343.9	3	LIHC,BLCA,HNSC
ENSG00000164896.18.vs.ENSG00000164889.11	1	LUSC
ENSG00000143819.11.vs.ENSG00000196187.10	2	LUSC,KIRC
ENSG00000124593.13.vs.ENSG00000164663.12	2	LUSC,KIRC
ENSG00000125037.11.vs.ENSG00000269982.1	1	LUSC
ENSG00000133961.18.vs.ENSG00000100767.14	1	KIRP
ENSG00000175592.7.vs.ENSG00000175602.3	3	STAD,PRAD,THCA
ENSG00000148925.9.vs.ENSG00000133794.16	1	LUSC
ENSG00000164070.10.vs.ENSG00000261668.1	2	LUAD,KIRC
ENSG00000092051.15.vs.ENSG00000258727.1	1	HNSC
ENSG00000166860.2.vs.ENSG00000166856.2	1	HNSC
ENSG00000267480.1.vs.ENSG00000141401.10	2	COAD,THCA
ENSG00000246596.5.vs.ENSG00000247679.2	1	LUAD
ENSG00000188613.6.vs.ENSG00000107581.11	1	BRCA
ENSG00000186364.10.vs.ENSG00000131788.14	1	STAD
ENSG00000221821.3.vs.ENSG00000146223.13	2	COAD,BRCA
ENSG00000259605.3.vs.ENSG00000104936.16	4	LIHC,LUAD,PRAD,BRCA
ENSG00000223764.2.vs.ENSG00000272438.1	5	STAD,LUSC,HNSC,KIRP,THCA
ENSG00000068305.16.vs.ENSG00000183060.14	1	BRCA
ENSG00000129691.14.vs.ENSG00000147465.10	1	HNSC
ENSG00000135451.11.vs.ENSG00000186897.4	2	STAD,KIRC
ENSG00000164776.8.vs.ENSG00000129103.16	1	STAD
ENSG00000160781.14.vs.ENSG00000242252.1	2	STAD,LUAD
ENSG00000103426.11.vs.ENSG00000126603.7	1	LUAD
ENSG00000108591.8.vs.ENSG00000279428.1	1	LIHC
ENSG00000125775.13.vs.ENSG00000101298.12	1	LUAD
ENSG00000160781.14.vs.ENSG00000260238.4	1	LUAD
ENSG00000067704.9.vs.ENSG00000118873.14	1	LUSC
ENSG00000267505.1.vs.ENSG00000267405.1	1	KIRC
ENSG00000107159.11.vs.ENSG00000198467.12	1	BRCA
ENSG00000116254.16.vs.ENSG00000069424.13	1	KIRP
ENSG00000149929.14.vs.ENSG00000149930.16	1	UCEC
ENSG00000261295.1.vs.ENSG00000102362.14	4	LIHC,STAD,BLCA,HNSC
ENSG00000128595.15.vs.ENSG00000128617.2	3	LUSC,BRCA,THCA
ENSG00000103351.11.vs.ENSG00000167984.15	1	LIHC
ENSG00000108556.7.vs.ENSG00000141503.14	2	BLCA,COAD
ENSG00000163485.14.vs.ENSG00000133055.7	2	LUAD,PRAD
ENSG00000227620.4.vs.ENSG00000160172.9	1	LUAD
ENSG00000123342.14.vs.ENSG00000182796.11	1	LUAD
ENSG00000159842.13.vs.ENSG00000177370.4	3	LUAD,COAD,KIRC
ENSG00000263316.1.vs.ENSG00000262943.6	2	STAD,KIRP
ENSG00000172935.8.vs.ENSG00000261276.1	2	STAD,PRAD
ENSG00000167281.17.vs.ENSG00000167280.15	1	LIHC
ENSG00000204033.8.vs.ENSG00000148600.13	1	STAD
ENSG00000239486.1.vs.ENSG00000239969.4	2	LUSC,BRCA
ENSG00000157368.9.vs.ENSG00000132613.13	1	KIRC
ENSG00000215458.7.vs.ENSG00000160214.11	1	LIHC
ENSG00000204619.6.vs.ENSG00000204618.7	2	BRCA,UCEC
ENSG00000171889.3.vs.ENSG00000238271.2	3	PRAD,HNSC,KIRC
ENSG00000178149.15.vs.ENSG00000178252.16	2	STAD,HNSC
ENSG00000166816.12.vs.ENSG00000186187.10	5	LIHC,LUAD,LUSC,KIRP,THCA
ENSG00000254338.1.vs.ENSG00000182759.3	2	LUSC,BRCA
ENSG00000183066.13.vs.ENSG00000198951.10	1	BRCA
ENSG00000183963.17.vs.ENSG00000198832.9	4	STAD,LUSC,PRAD,COAD
ENSG00000189077.9.vs.ENSG00000127948.12	3	STAD,LUAD,LUSC
ENSG00000122729.17.vs.ENSG00000107201.8	2	BRCA,THCA
ENSG00000231720.1.vs.ENSG00000280707.1	1	UCEC
ENSG00000155506.15.vs.ENSG00000170271.9	1	THCA
ENSG00000173011.11.vs.ENSG00000109519.11	1	LIHC
ENSG00000228962.1.vs.ENSG00000204290.9	3	STAD,PRAD,KIRP
ENSG00000187024.12.vs.ENSG00000136854.16	1	LIHC
ENSG00000196976.6.vs.ENSG00000130827.6	1	STAD
ENSG00000169692.11.vs.ENSG00000172889.14	1	HNSC
ENSG00000055211.11.vs.ENSG00000233330.1	1	PRAD
ENSG00000185187.11.vs.ENSG00000184363.8	3	STAD,BLCA,KIRC
ENSG00000234409.6.vs.ENSG00000099904.14	1	LUSC
ENSG00000149782.10.vs.ENSG00000002330.12	1	LUSC
ENSG00000122735.14.vs.ENSG00000168913.6	2	STAD,LUAD
ENSG00000176871.7.vs.ENSG00000111445.12	1	BLCA
ENSG00000115232.12.vs.ENSG00000188452.12	2	LIHC,KIRC
ENSG00000125650.4.vs.ENSG00000125652.6	2	LUSC,COAD
ENSG00000162572.18.vs.ENSG00000131584.17	3	LIHC,LUAD,HNSC
ENSG00000149968.10.vs.ENSG00000255282.5	1	HNSC
ENSG00000177839.6.vs.ENSG00000279375.1	3	LUAD,HNSC,THCA
ENSG00000254777.4.vs.ENSG00000254802.1	1	COAD
ENSG00000123136.13.vs.ENSG00000123146.18	2	LUSC,PRAD
ENSG00000089486.15.vs.ENSG00000103415.10	2	HNSC,UCEC
ENSG00000268970.1.vs.ENSG00000123870.10	3	PRAD,HNSC,BRCA
ENSG00000179262.8.vs.ENSG00000179271.2	2	LIHC,LUSC
ENSG00000240338.4.vs.ENSG00000050820.15	1	KIRP
ENSG00000105137.11.vs.ENSG00000105135.14	2	LUSC,HNSC
ENSG00000179751.6.vs.ENSG00000188505.4	1	STAD
ENSG00000105655.17.vs.ENSG00000130511.14	1	BRCA
ENSG00000250794.2.vs.ENSG00000145002.11	2	LUAD,HNSC
ENSG00000248114.1.vs.ENSG00000227802.1	1	KIRC
ENSG00000100359.19.vs.ENSG00000196588.13	1	LUAD
ENSG00000078814.14.vs.ENSG00000100991.10	2	HNSC,BRCA
ENSG00000141447.15.vs.ENSG00000154040.19	2	KIRC,UCEC
ENSG00000178342.4.vs.ENSG00000278075.1	1	LUSC
ENSG00000030582.15.vs.ENSG00000161682.13	2	LIHC,BRCA
ENSG00000163879.10.vs.ENSG00000134697.11	1	PRAD
ENSG00000259807.1.vs.ENSG00000260517.2	3	STAD,HNSC,THCA
ENSG00000223705.8.vs.ENSG00000272391.4	1	LUSC
ENSG00000135597.17.vs.ENSG00000203734.10	2	LIHC,KIRC
ENSG00000237807.3.vs.ENSG00000254204.1	3	LUSC,PRAD,BRCA
ENSG00000182199.9.vs.ENSG00000185633.9	2	LIHC,HNSC
ENSG00000244383.1.vs.ENSG00000198643.5	1	BLCA
ENSG00000160404.16.vs.ENSG00000167094.14	1	PRAD
ENSG00000196557.9.vs.ENSG00000116176.6	1	UCEC
ENSG00000262006.1.vs.ENSG00000229980.4	1	PRAD
ENSG00000167778.7.vs.ENSG00000111077.16	1	STAD
ENSG00000234354.3.vs.ENSG00000280169.1	1	BRCA
ENSG00000148824.17.vs.ENSG00000203772.7	3	LIHC,KIRP,BRCA
ENSG00000197956.8.vs.ENSG00000238279.1	3	LUSC,COAD,THCA
ENSG00000173124.13.vs.ENSG00000234026.1	3	STAD,LUAD,THCA
ENSG00000134398.11.vs.ENSG00000166851.13	1	BRCA
ENSG00000111344.10.vs.ENSG00000135144.6	3	LUSC,COAD,HNSC
ENSG00000226950.5.vs.ENSG00000248375.1	3	COAD,KIRP,BRCA
ENSG00000149243.14.vs.ENSG00000149273.13	1	LIHC
ENSG00000159263.14.vs.ENSG00000159267.13	2	PRAD,BRCA
ENSG00000114354.11.vs.ENSG00000154175.15	1	KIRC
ENSG00000160951.3.vs.ENSG00000123143.11	4	LUSC,PRAD,HNSC,BRCA
ENSG00000092820.16.vs.ENSG00000164674.14	1	UCEC
ENSG00000131188.10.vs.ENSG00000113758.12	1	HNSC
ENSG00000257989.1.vs.ENSG00000272724.1	2	KIRP,BRCA
ENSG00000270510.1.vs.ENSG00000166575.15	1	BRCA
ENSG00000143621.15.vs.ENSG00000143553.9	1	LUAD
ENSG00000276742.1.vs.ENSG00000107672.13	1	BRCA
ENSG00000136877.13.vs.ENSG00000106991.12	1	STAD
ENSG00000113716.11.vs.ENSG00000182578.12	1	BRCA
ENSG00000227066.1.vs.ENSG00000187980.6	1	LIHC
ENSG00000140939.13.vs.ENSG00000196123.11	3	HNSC,KIRC,BRCA
ENSG00000108799.11.vs.ENSG00000108797.10	1	KIRC
ENSG00000242953.1.vs.ENSG00000240665.1	3	STAD,KIRC,THCA
ENSG00000263970.1.vs.ENSG00000173482.15	1	BLCA
ENSG00000237172.3.vs.ENSG00000125149.10	1	HNSC
ENSG00000149346.13.vs.ENSG00000101384.10	1	STAD
ENSG00000115841.18.vs.ENSG00000138061.10	3	BLCA,KIRP,BRCA
ENSG00000015532.8.vs.ENSG00000279792.1	1	KIRP
ENSG00000269858.4.vs.ENSG00000233622.1	1	LUSC
ENSG00000160111.11.vs.ENSG00000127533.3	1	LUSC
ENSG00000100201.17.vs.ENSG00000100196.9	2	LUSC,BRCA
ENSG00000177791.11.vs.ENSG00000272791.1	2	LUSC,UCEC
ENSG00000131153.7.vs.ENSG00000131149.16	1	BRCA
ENSG00000168060.13.vs.ENSG00000168061.12	1	BLCA
ENSG00000158158.10.vs.ENSG00000273265.1	3	LIHC,COAD,BRCA
ENSG00000151117.7.vs.ENSG00000179057.12	5	STAD,LUAD,HNSC,KIRC,BRCA
ENSG00000230303.4.vs.ENSG00000234424.2	1	LUAD
ENSG00000170075.8.vs.ENSG00000143862.6	2	STAD,BLCA
ENSG00000167549.17.vs.ENSG00000198720.11	1	BRCA
ENSG00000004534.13.vs.ENSG00000281691.1	1	STAD
ENSG00000259933.5.vs.ENSG00000261123.1	6	STAD,BLCA,HNSC,KIRC,BRCA,THCA
ENSG00000099956.16.vs.ENSG00000099958.13	1	STAD
ENSG00000213722.7.vs.ENSG00000204420.7	2	PRAD,BLCA
ENSG00000273027.1.vs.ENSG00000227039.5	1	STAD
ENSG00000255191.1.vs.ENSG00000254605.1	1	STAD
ENSG00000180385.7.vs.ENSG00000206567.8	1	STAD
ENSG00000146426.16.vs.ENSG00000029639.9	1	BLCA
ENSG00000138834.11.vs.ENSG00000103024.6	2	LUAD,BRCA
ENSG00000104679.9.vs.ENSG00000134013.14	1	HNSC
ENSG00000256210.3.vs.ENSG00000188269.7	1	HNSC
ENSG00000244953.1.vs.ENSG00000187479.5	3	LUAD,LUSC,PRAD
ENSG00000136881.10.vs.ENSG00000230328.2	1	STAD
ENSG00000186471.11.vs.ENSG00000101882.8	1	STAD
ENSG00000233101.9.vs.ENSG00000260027.4	2	BLCA,THCA
ENSG00000173145.10.vs.ENSG00000138193.13	1	LUAD
ENSG00000261637.1.vs.ENSG00000260605.1	1	LIHC
ENSG00000197993.6.vs.ENSG00000165131.6	1	KIRP
ENSG00000101082.12.vs.ENSG00000259399.1	1	LUSC
ENSG00000102854.13.vs.ENSG00000162006.8	4	LUSC,COAD,HNSC,BRCA
ENSG00000178836.6.vs.ENSG00000248705.1	1	KIRC
ENSG00000237517.7.vs.ENSG00000241527.1	1	LUSC
ENSG00000196110.6.vs.ENSG00000267510.1	1	PRAD
ENSG00000254444.1.vs.ENSG00000180919.3	1	LUSC
ENSG00000277877.3.vs.ENSG00000203667.8	2	LIHC,LUSC
ENSG00000118094.10.vs.ENSG00000019144.15	2	LIHC,UCEC
ENSG00000248712.6.vs.ENSG00000172367.14	2	BRCA,THCA
ENSG00000253641.4.vs.ENSG00000253649.2	2	PRAD,COAD
ENSG00000172476.3.vs.ENSG00000234405.1	1	UCEC
ENSG00000105664.9.vs.ENSG00000105662.14	1	PRAD
ENSG00000187583.9.vs.ENSG00000187642.8	2	LIHC,COAD
ENSG00000172725.12.vs.ENSG00000175634.13	2	LIHC,HNSC
ENSG00000124915.9.vs.ENSG00000134780.8	1	LUAD
ENSG00000090975.11.vs.ENSG00000182196.12	3	LIHC,LUAD,BLCA
ENSG00000152382.5.vs.ENSG00000143157.10	2	LUAD,LUSC
ENSG00000213590.2.vs.ENSG00000260190.1	2	LIHC,HNSC
ENSG00000204421.2.vs.ENSG00000244355.6	2	BLCA,COAD
ENSG00000155366.15.vs.ENSG00000155363.17	1	COAD
ENSG00000093144.17.vs.ENSG00000118518.14	1	LIHC
ENSG00000120333.4.vs.ENSG00000116161.16	1	LIHC
ENSG00000128564.6.vs.ENSG00000106367.12	2	STAD,COAD
ENSG00000213694.3.vs.ENSG00000148082.8	1	STAD
ENSG00000144045.12.vs.ENSG00000115297.10	1	LUAD
ENSG00000088038.16.vs.ENSG00000105617.3	1	BRCA
ENSG00000182048.10.vs.ENSG00000167311.12	1	STAD
ENSG00000167645.15.vs.ENSG00000267748.4	1	BRCA
ENSG00000214765.7.vs.ENSG00000164742.13	3	LUAD,COAD,KIRC
ENSG00000268883.2.vs.ENSG00000235961.5	1	STAD
ENSG00000009724.15.vs.ENSG00000120948.14	1	LIHC
ENSG00000272821.1.vs.ENSG00000025708.11	1	LUAD
ENSG00000119408.15.vs.ENSG00000136930.11	2	STAD,BRCA
ENSG00000180061.8.vs.ENSG00000160469.15	1	KIRC
ENSG00000259803.5.vs.ENSG00000129910.6	2	STAD,LUSC
ENSG00000168827.13.vs.ENSG00000272087.1	3	BLCA,KIRC,BRCA
ENSG00000172500.11.vs.ENSG00000172543.6	2	PRAD,HNSC
ENSG00000077097.12.vs.ENSG00000077092.17	2	STAD,KIRP
ENSG00000254545.1.vs.ENSG00000134668.11	4	LUAD,BLCA,BRCA,THCA
ENSG00000126246.8.vs.ENSG00000272333.4	1	LUAD
ENSG00000172346.13.vs.ENSG00000100417.10	2	LUSC,PRAD
ENSG00000110395.4.vs.ENSG00000076706.13	1	STAD
ENSG00000119397.15.vs.ENSG00000119396.9	2	LUSC,UCEC

## Sheet: CG1-up_vs_down
gene pair	number of TCGA datasets	TCGA datasets
ENSG00000236830.5.vs.ENSG00000226054.2	1	COAD
ENSG00000068137.13.vs.ENSG00000037042.8	1	KIRC
ENSG00000147571.4.vs.ENSG00000147573.15	1	UCEC
ENSG00000101460.11.vs.ENSG00000101464.9	1	COAD
ENSG00000173846.11.vs.ENSG00000188396.3	1	LUAD
ENSG00000168056.13.vs.ENSG00000142186.15	1	BRCA
ENSG00000167106.10.vs.ENSG00000227218.6	1	STAD
ENSG00000133805.14.vs.ENSG00000255823.2	1	LIHC
ENSG00000042062.10.vs.ENSG00000196396.8	1	PRAD
ENSG00000124574.13.vs.ENSG00000171462.13	1	STAD
ENSG00000169583.12.vs.ENSG00000148362.9	1	STAD
ENSG00000013306.14.vs.ENSG00000108309.11	1	PRAD
ENSG00000168802.11.vs.ENSG00000103044.9	1	COAD
ENSG00000072518.19.vs.ENSG00000167771.5	1	THCA
ENSG00000227473.1.vs.ENSG00000235173.5	1	PRAD
ENSG00000158417.9.vs.ENSG00000135945.8	1	LUAD
ENSG00000256028.2.vs.ENSG00000090975.11	1	STAD
ENSG00000070985.12.vs.ENSG00000184281.13	1	HNSC
ENSG00000196405.11.vs.ENSG00000168350.7	2	LUAD,KIRC
ENSG00000160326.12.vs.ENSG00000160325.13	2	KIRP,BRCA
ENSG00000171262.10.vs.ENSG00000172575.10	1	KIRP
ENSG00000106123.10.vs.ENSG00000165125.16	1	KIRP
ENSG00000196562.13.vs.ENSG00000124151.17	1	BLCA
ENSG00000280213.1.vs.ENSG00000196700.6	1	COAD
ENSG00000101190.11.vs.ENSG00000092758.14	1	COAD
ENSG00000158008.8.vs.ENSG00000158014.13	1	PRAD
ENSG00000183798.4.vs.ENSG00000132793.10	1	STAD
ENSG00000197746.12.vs.ENSG00000107736.18	1	LIHC
ENSG00000187634.9.vs.ENSG00000188976.9	1	BRCA
ENSG00000172460.13.vs.ENSG00000162078.10	1	UCEC
ENSG00000223802.6.vs.ENSG00000005007.11	1	LIHC
ENSG00000107859.8.vs.ENSG00000119915.4	1	HNSC
ENSG00000123329.16.vs.ENSG00000111087.8	1	HNSC
ENSG00000108262.14.vs.ENSG00000167543.14	1	KIRC
ENSG00000099377.12.vs.ENSG00000099365.8	1	LUSC
ENSG00000101160.12.vs.ENSG00000101158.11	1	KIRC
ENSG00000134684.9.vs.ENSG00000162522.9	2	LIHC,KIRC
ENSG00000185519.8.vs.ENSG00000184908.16	1	LIHC
ENSG00000167969.11.vs.ENSG00000167968.11	1	LIHC
ENSG00000204165.5.vs.ENSG00000184481.15	1	COAD
ENSG00000173338.11.vs.ENSG00000173442.10	1	STAD
ENSG00000179564.3.vs.ENSG00000214706.9	1	HNSC
ENSG00000144746.6.vs.ENSG00000163380.14	1	KIRC
ENSG00000196296.12.vs.ENSG00000177548.11	1	BRCA
ENSG00000072778.18.vs.ENSG00000004975.10	1	COAD
ENSG00000106077.17.vs.ENSG00000225969.1	1	BRCA
ENSG00000261659.2.vs.ENSG00000127585.10	1	KIRC
ENSG00000149923.12.vs.ENSG00000149922.9	1	LUAD
ENSG00000131389.15.vs.ENSG00000144596.10	2	PRAD,KIRP
ENSG00000197982.13.vs.ENSG00000188786.9	1	UCEC
ENSG00000167644.10.vs.ENSG00000167645.15	1	BRCA
ENSG00000107404.16.vs.ENSG00000169962.4	1	PRAD
ENSG00000228278.3.vs.ENSG00000106948.15	2	LUSC,COAD
ENSG00000077150.16.vs.ENSG00000059915.15	2	HNSC,BRCA
ENSG00000215187.8.vs.ENSG00000198853.10	2	LUAD,PRAD
ENSG00000119522.14.vs.ENSG00000148204.10	1	LIHC
ENSG00000170291.13.vs.ENSG00000181885.17	1	STAD
ENSG00000072736.17.vs.ENSG00000103067.10	1	STAD
ENSG00000110925.5.vs.ENSG00000050426.14	1	BRCA
ENSG00000224066.1.vs.ENSG00000160050.13	1	KIRP
ENSG00000184697.6.vs.ENSG00000213937.3	1	STAD
ENSG00000104903.4.vs.ENSG00000008441.15	1	STAD
ENSG00000135365.14.vs.ENSG00000165905.15	1	KIRP
ENSG00000108963.16.vs.ENSG00000263050.1	1	LIHC
ENSG00000163794.6.vs.ENSG00000138100.12	1	BRCA
ENSG00000139044.9.vs.ENSG00000171840.10	1	HNSC
ENSG00000140876.10.vs.ENSG00000261707.1	1	STAD
ENSG00000160883.9.vs.ENSG00000113763.9	1	BLCA
ENSG00000211445.10.vs.ENSG00000145901.13	1	STAD
ENSG00000130813.16.vs.ENSG00000130812.9	1	STAD
ENSG00000111671.8.vs.ENSG00000111669.13	2	KIRP,BRCA
ENSG00000008323.14.vs.ENSG00000067182.6	1	LUAD
ENSG00000106628.9.vs.ENSG00000106624.7	1	KIRC
ENSG00000253859.2.vs.ENSG00000237264.4	2	LUSC,HNSC
ENSG00000185838.12.vs.ENSG00000184058.11	1	STAD
ENSG00000011009.9.vs.ENSG00000117308.13	1	UCEC
ENSG00000169258.6.vs.ENSG00000074276.9	1	LUAD
ENSG00000169188.4.vs.ENSG00000158578.17	1	HNSC
ENSG00000198517.8.vs.ENSG00000164855.14	2	LUAD,BLCA
ENSG00000244038.8.vs.ENSG00000158828.5	1	STAD
ENSG00000103126.13.vs.ENSG00000185615.14	2	STAD,LUAD
ENSG00000047579.18.vs.ENSG00000008083.12	1	STAD
ENSG00000076344.14.vs.ENSG00000167930.14	1	LUSC
ENSG00000164062.11.vs.ENSG00000259970.1	1	LIHC
ENSG00000204791.7.vs.ENSG00000178814.14	1	THCA
ENSG00000181856.13.vs.ENSG00000006047.11	2	HNSC,KIRC
ENSG00000130881.12.vs.ENSG00000130876.10	2	LIHC,COAD
ENSG00000163155.10.vs.ENSG00000163154.5	1	LUSC
ENSG00000155252.13.vs.ENSG00000119986.6	1	BRCA
ENSG00000144857.13.vs.ENSG00000206530.7	1	STAD
ENSG00000204347.3.vs.ENSG00000196169.13	1	UCEC
ENSG00000148925.9.vs.ENSG00000133794.16	2	LIHC,COAD
ENSG00000166860.2.vs.ENSG00000166856.2	1	LIHC
ENSG00000115310.16.vs.ENSG00000214595.10	2	LIHC,STAD
ENSG00000259605.3.vs.ENSG00000104936.16	1	STAD
ENSG00000135451.11.vs.ENSG00000186897.4	1	LIHC
ENSG00000148826.8.vs.ENSG00000068383.17	2	STAD,PRAD
ENSG00000125775.13.vs.ENSG00000101298.12	2	PRAD,UCEC
ENSG00000107159.11.vs.ENSG00000198467.12	1	HNSC
ENSG00000116254.16.vs.ENSG00000069424.13	4	STAD,BLCA,KIRC,BRCA
ENSG00000261295.1.vs.ENSG00000102362.14	2	COAD,THCA
ENSG00000280328.1.vs.ENSG00000184209.14	1	LUSC
ENSG00000166428.11.vs.ENSG00000185567.6	5	LIHC,STAD,PRAD,BRCA,THCA
ENSG00000103351.11.vs.ENSG00000167984.15	1	BLCA
ENSG00000123342.14.vs.ENSG00000182796.11	1	PRAD
ENSG00000159842.13.vs.ENSG00000177370.4	1	STAD
ENSG00000205744.8.vs.ENSG00000130545.14	2	PRAD,BLCA
ENSG00000157368.9.vs.ENSG00000132613.13	2	LIHC,PRAD
ENSG00000215458.7.vs.ENSG00000160214.11	1	BRCA
ENSG00000204619.6.vs.ENSG00000204618.7	1	LUSC
ENSG00000178149.15.vs.ENSG00000178252.16	1	LIHC
ENSG00000189077.9.vs.ENSG00000127948.12	2	PRAD,BRCA
ENSG00000122729.17.vs.ENSG00000107201.8	2	LIHC,LUSC
ENSG00000176871.7.vs.ENSG00000111445.12	1	COAD
ENSG00000106484.13.vs.ENSG00000158623.13	1	PRAD
ENSG00000254777.4.vs.ENSG00000254802.1	1	BRCA
ENSG00000123136.13.vs.ENSG00000123146.18	1	LIHC
ENSG00000105655.17.vs.ENSG00000130511.14	2	STAD,PRAD
ENSG00000139540.10.vs.ENSG00000139645.9	1	BLCA
ENSG00000100359.19.vs.ENSG00000196588.13	1	STAD
ENSG00000141447.15.vs.ENSG00000154040.19	1	STAD
ENSG00000163879.10.vs.ENSG00000134697.11	1	LIHC
ENSG00000115657.11.vs.ENSG00000158552.11	1	KIRP
ENSG00000157856.9.vs.ENSG00000115155.15	1	UCEC
ENSG00000160404.16.vs.ENSG00000167094.14	2	COAD,BRCA
ENSG00000228727.7.vs.ENSG00000204396.9	1	BRCA
ENSG00000111344.10.vs.ENSG00000135144.6	1	PRAD
ENSG00000159263.14.vs.ENSG00000159267.13	1	KIRC
ENSG00000131188.10.vs.ENSG00000113758.12	2	LUAD,THCA
ENSG00000136877.13.vs.ENSG00000106991.12	1	LIHC
ENSG00000113716.11.vs.ENSG00000182578.12	3	COAD,HNSC,THCA
ENSG00000100276.9.vs.ENSG00000185340.14	1	UCEC
ENSG00000149346.13.vs.ENSG00000101384.10	1	PRAD
ENSG00000015532.8.vs.ENSG00000279792.1	2	LIHC,BRCA
ENSG00000177791.11.vs.ENSG00000272791.1	2	HNSC,BRCA
ENSG00000207955.3.vs.ENSG00000167118.9	1	UCEC
ENSG00000168060.13.vs.ENSG00000168061.12	2	LUAD,THCA
ENSG00000104679.9.vs.ENSG00000134013.14	1	STAD
ENSG00000249635.1.vs.ENSG00000168743.11	1	LIHC
ENSG00000047849.20.vs.ENSG00000132153.13	3	LIHC,STAD,HNSC
ENSG00000186471.11.vs.ENSG00000101882.8	2	PRAD,BRCA
ENSG00000100079.6.vs.ENSG00000128283.6	3	LUSC,PRAD,HNSC
ENSG00000196110.6.vs.ENSG00000267510.1	1	LIHC
ENSG00000062524.14.vs.ENSG00000137825.9	1	KIRP
ENSG00000248712.6.vs.ENSG00000172367.14	1	STAD
ENSG00000235663.1.vs.ENSG00000228727.7	1	BRCA
ENSG00000105664.9.vs.ENSG00000105662.14	1	LIHC
ENSG00000187583.9.vs.ENSG00000187642.8	1	KIRP
ENSG00000271787.1.vs.ENSG00000172059.9	1	LUAD
ENSG00000213694.3.vs.ENSG00000148082.8	1	UCEC
ENSG00000167645.15.vs.ENSG00000267748.4	1	LIHC
ENSG00000009724.15.vs.ENSG00000120948.14	1	HNSC
ENSG00000168477.16.vs.ENSG00000231852.5	3	LIHC,LUAD,KIRC
ENSG00000172500.11.vs.ENSG00000172543.6	1	KIRC
ENSG00000159023.17.vs.ENSG00000253304.1	2	LIHC,THCA
ENSG00000279464.1.vs.ENSG00000035720.6	1	KIRC
ENSG00000261884.2.vs.ENSG00000159792.8	2	LUAD,PRAD
ENSG00000126246.8.vs.ENSG00000272333.4	1	HNSC

## Sheet: CG2-up_vs_up+down_vs_down
gene pair	number of TCGA datasets	TCGA datasets
ENSG00000224861.1.vs.ENSG00000258847.1	1	BRCA
ENSG00000224650.2.vs.ENSG00000211976.2	2	STAD,BRCA
ENSG00000104870.11.vs.ENSG00000142552.6	1	BLCA
ENSG00000211895.4.vs.ENSG00000253701.2	3	LIHC,STAD,PRAD
ENSG00000142748.11.vs.ENSG00000174950.9	1	LUSC
ENSG00000170858.9.vs.ENSG00000104972.13	1	LUSC
ENSG00000258808.1.vs.ENSG00000258942.1	1	HNSC
ENSG00000229196.3.vs.ENSG00000128607.12	1	STAD
ENSG00000120738.7.vs.ENSG00000241458.1	1	THCA
ENSG00000158014.13.vs.ENSG00000158022.6	4	LUAD,COAD,KIRC,UCEC
ENSG00000271584.1.vs.ENSG00000271390.1	1	LUSC
ENSG00000182318.5.vs.ENSG00000268895.4	2	STAD,LUAD
ENSG00000128591.14.vs.ENSG00000272899.2	3	STAD,LUSC,THCA
ENSG00000164932.11.vs.ENSG00000207399.1	1	COAD
ENSG00000044446.10.vs.ENSG00000173698.16	1	BRCA
ENSG00000147669.9.vs.ENSG00000104450.11	3	LUAD,HNSC,BRCA
ENSG00000142677.3.vs.ENSG00000142661.17	3	STAD,LUAD,BLCA
ENSG00000197562.8.vs.ENSG00000007541.13	3	STAD,LUAD,KIRC
ENSG00000087077.10.vs.ENSG00000087087.17	1	KIRC
ENSG00000211459.2.vs.ENSG00000212907.2	2	LIHC,THCA
ENSG00000272908.1.vs.ENSG00000211695.2	1	LUSC
ENSG00000111684.9.vs.ENSG00000238795.1	1	LIHC
ENSG00000161835.9.vs.ENSG00000123358.18	3	LUAD,PRAD,KIRC
ENSG00000167754.11.vs.ENSG00000167755.12	4	STAD,LUAD,COAD,KIRC
ENSG00000076248.9.vs.ENSG00000076555.14	2	LIHC,LUSC
ENSG00000254709.5.vs.ENSG00000211677.2	1	STAD
ENSG00000210082.2.vs.ENSG00000198899.2	4	LIHC,PRAD,KIRC,THCA
ENSG00000152595.15.vs.ENSG00000029559.6	1	KIRC
ENSG00000167780.10.vs.ENSG00000167779.6	4	PRAD,BLCA,COAD,KIRC
ENSG00000137752.21.vs.ENSG00000204397.6	5	LIHC,STAD,LUSC,PRAD,BRCA
ENSG00000068137.13.vs.ENSG00000184451.5	2	STAD,LUAD
ENSG00000198938.2.vs.ENSG00000198786.2	3	LIHC,PRAD,KIRC
ENSG00000235821.1.vs.ENSG00000273340.1	1	COAD
ENSG00000123159.14.vs.ENSG00000160951.3	1	LUSC
ENSG00000171611.8.vs.ENSG00000137161.15	1	BRCA
ENSG00000136840.17.vs.ENSG00000160408.13	1	COAD
ENSG00000274395.1.vs.ENSG00000257398.5	2	LUSC,PRAD
ENSG00000127957.15.vs.ENSG00000127946.15	1	STAD
ENSG00000269976.1.vs.ENSG00000231948.2	4	STAD,PRAD,COAD,THCA
ENSG00000209082.1.vs.ENSG00000210049.1	2	LIHC,KIRC
ENSG00000236740.5.vs.ENSG00000236996.1	2	STAD,UCEC
ENSG00000164889.11.vs.ENSG00000197150.11	2	STAD,LUSC
ENSG00000242136.1.vs.ENSG00000261104.1	2	LUAD,BRCA
ENSG00000111602.10.vs.ENSG00000276272.1	1	STAD
ENSG00000158163.13.vs.ENSG00000118017.3	4	STAD,BLCA,HNSC,KIRC
ENSG00000224273.1.vs.ENSG00000227038.2	2	LUSC,PRAD
ENSG00000163975.10.vs.ENSG00000233487.6	1	PRAD
ENSG00000167397.13.vs.ENSG00000151006.7	4	LUAD,LUSC,PRAD,BRCA
ENSG00000275542.1.vs.ENSG00000275966.1	1	BLCA
ENSG00000106153.12.vs.ENSG00000164776.8	1	STAD
ENSG00000173825.6.vs.ENSG00000133884.8	1	HNSC
ENSG00000262468.4.vs.ENSG00000185739.12	2	STAD,UCEC
ENSG00000240970.1.vs.ENSG00000254909.1	1	BLCA
ENSG00000170113.14.vs.ENSG00000140157.13	1	BRCA
ENSG00000114744.7.vs.ENSG00000206199.8	1	HNSC
ENSG00000267258.1.vs.ENSG00000105176.16	1	STAD
ENSG00000182379.9.vs.ENSG00000182199.9	2	HNSC,THCA
ENSG00000074319.11.vs.ENSG00000151116.15	3	STAD,BLCA,HNSC
ENSG00000163820.13.vs.ENSG00000163818.15	1	LUSC
ENSG00000171475.12.vs.ENSG00000094804.8	3	STAD,LUAD,BRCA
ENSG00000251491.2.vs.ENSG00000243792.1	1	LUSC
ENSG00000163064.6.vs.ENSG00000258910.2	1	STAD
ENSG00000249258.2.vs.ENSG00000104219.11	1	STAD
ENSG00000163898.8.vs.ENSG00000163900.9	1	UCEC
ENSG00000140030.5.vs.ENSG00000258867.4	1	STAD
ENSG00000183206.15.vs.ENSG00000265766.2	2	PRAD,BRCA
ENSG00000132680.9.vs.ENSG00000143622.9	3	STAD,LUAD,LUSC
ENSG00000124942.12.vs.ENSG00000254772.8	2	LUAD,UCEC
ENSG00000248592.6.vs.ENSG00000055955.14	4	LIHC,STAD,LUSC,BRCA
ENSG00000135249.6.vs.ENSG00000272604.1	3	LIHC,LUSC,BRCA
ENSG00000100979.13.vs.ENSG00000124257.6	2	LIHC,BLCA
ENSG00000259994.1.vs.ENSG00000107951.11	2	LIHC,STAD
ENSG00000198939.6.vs.ENSG00000178187.6	1	BRCA
ENSG00000105698.14.vs.ENSG00000268947.1	3	LIHC,LUAD,PRAD
ENSG00000267632.1.vs.ENSG00000265611.1	1	COAD
ENSG00000177025.3.vs.ENSG00000166704.10	3	PRAD,BRCA,THCA
ENSG00000256771.2.vs.ENSG00000267268.1	1	BRCA
ENSG00000027847.12.vs.ENSG00000184840.10	2	LUAD,HNSC
ENSG00000236409.1.vs.ENSG00000160796.15	4	STAD,PRAD,COAD,HNSC
ENSG00000139998.13.vs.ENSG00000176153.11	3	STAD,LUAD,THCA
ENSG00000260704.1.vs.ENSG00000180389.6	1	BRCA
ENSG00000254510.1.vs.ENSG00000174576.7	3	PRAD,BLCA,BRCA
ENSG00000083845.7.vs.ENSG00000269855.2	1	UCEC
ENSG00000224529.1.vs.ENSG00000163254.4	1	UCEC
ENSG00000108639.6.vs.ENSG00000187997.10	2	HNSC,KIRC
ENSG00000182901.14.vs.ENSG00000223963.2	1	STAD
ENSG00000260027.4.vs.ENSG00000108511.9	1	BLCA
ENSG00000271943.1.vs.ENSG00000213846.4	2	KIRP,BRCA
ENSG00000114270.14.vs.ENSG00000114268.10	2	PRAD,KIRP
ENSG00000263612.1.vs.ENSG00000255085.7	1	STAD
ENSG00000239392.2.vs.ENSG00000198876.11	1	STAD
ENSG00000144867.10.vs.ENSG00000091513.13	4	LIHC,STAD,PRAD,KIRP
ENSG00000172935.8.vs.ENSG00000261625.1	3	STAD,PRAD,THCA
ENSG00000273682.1.vs.ENSG00000160799.10	1	KIRP
ENSG00000068001.12.vs.ENSG00000114378.15	2	HNSC,KIRC
ENSG00000115266.10.vs.ENSG00000115268.8	4	LIHC,LUSC,PRAD,HNSC
ENSG00000140961.11.vs.ENSG00000103154.8	2	LUSC,KIRC
ENSG00000108671.8.vs.ENSG00000176749.7	1	BRCA
ENSG00000235408.4.vs.ENSG00000201512.1	3	LIHC,LUSC,BLCA
ENSG00000091073.18.vs.ENSG00000243566.5	3	LUAD,KIRP,THCA
ENSG00000272438.1.vs.ENSG00000187634.9	4	BLCA,HNSC,KIRP,THCA
ENSG00000136840.17.vs.ENSG00000167103.10	3	LIHC,PRAD,BRCA
ENSG00000106789.11.vs.ENSG00000095383.18	3	STAD,KIRP,UCEC
ENSG00000092096.13.vs.ENSG00000100842.11	2	STAD,HNSC
ENSG00000109854.12.vs.ENSG00000185238.11	3	STAD,KIRP,BRCA
ENSG00000103460.15.vs.ENSG00000249231.6	2	COAD,KIRP
ENSG00000180370.9.vs.ENSG00000163964.12	1	KIRC
ENSG00000268049.1.vs.ENSG00000268895.4	4	STAD,LUAD,LUSC,HNSC
ENSG00000232901.1.vs.ENSG00000206567.8	2	STAD,THCA
ENSG00000176927.13.vs.ENSG00000126653.14	3	STAD,BLCA,BRCA
ENSG00000130958.10.vs.ENSG00000165244.6	2	STAD,KIRC
ENSG00000259848.7.vs.ENSG00000231331.1	2	STAD,LUSC
ENSG00000198346.9.vs.ENSG00000213777.5	1	BRCA
ENSG00000231064.4.vs.ENSG00000279487.1	2	STAD,LUAD
ENSG00000149480.5.vs.ENSG00000149016.14	2	LUSC,PRAD
ENSG00000108389.8.vs.ENSG00000108387.13	1	BRCA
ENSG00000187534.6.vs.ENSG00000275395.3	1	PRAD
ENSG00000127337.5.vs.ENSG00000090382.5	1	BLCA
ENSG00000084652.14.vs.ENSG00000160050.13	1	KIRC
ENSG00000237452.2.vs.ENSG00000267395.4	1	COAD
ENSG00000140853.14.vs.ENSG00000087237.9	2	BLCA,UCEC
ENSG00000279320.1.vs.ENSG00000188313.11	4	STAD,PRAD,HNSC,KIRC
ENSG00000264781.1.vs.ENSG00000211904.2	1	LUAD
ENSG00000140543.12.vs.ENSG00000271997.1	1	BRCA
ENSG00000172232.8.vs.ENSG00000196415.8	4	LUAD,PRAD,KIRC,THCA
ENSG00000268027.4.vs.ENSG00000270164.1	3	BLCA,BRCA,UCEC
ENSG00000243234.1.vs.ENSG00000177025.3	1	BRCA
ENSG00000237111.1.vs.ENSG00000263413.2	2	STAD,LUAD
ENSG00000234139.2.vs.ENSG00000088367.19	2	STAD,LUAD
ENSG00000115266.10.vs.ENSG00000268798.1	2	LIHC,COAD
ENSG00000105997.21.vs.ENSG00000078399.14	1	BRCA
ENSG00000128228.4.vs.ENSG00000161180.9	1	LIHC
ENSG00000175061.16.vs.ENSG00000187688.13	3	PRAD,COAD,KIRP
ENSG00000267108.1.vs.ENSG00000267199.1	4	LUSC,COAD,KIRP,THCA
ENSG00000122477.11.vs.ENSG00000137992.13	1	STAD
ENSG00000265714.1.vs.ENSG00000211904.2	1	LUAD
ENSG00000151376.15.vs.ENSG00000278989.1	3	LIHC,LUAD,KIRP
ENSG00000132912.11.vs.ENSG00000086589.10	1	LUAD
ENSG00000184697.6.vs.ENSG00000162069.13	4	LIHC,BLCA,COAD,HNSC
ENSG00000178386.11.vs.ENSG00000186026.6	3	LIHC,PRAD,BRCA
ENSG00000264954.1.vs.ENSG00000108622.9	1	STAD
ENSG00000173041.10.vs.ENSG00000235349.1	1	LUAD
ENSG00000167554.13.vs.ENSG00000221923.7	4	LIHC,STAD,HNSC,BRCA
ENSG00000231025.1.vs.ENSG00000155640.6	3	LUAD,BRCA,UCEC
ENSG00000223656.1.vs.ENSG00000099260.9	1	KIRC
ENSG00000130600.14.vs.ENSG00000226416.1	1	BLCA
ENSG00000154079.5.vs.ENSG00000271967.1	1	COAD
ENSG00000261295.1.vs.ENSG00000102359.5	7	LIHC,STAD,BLCA,COAD,HNSC,BRCA,THCA
ENSG00000198218.9.vs.ENSG00000172053.13	2	STAD,HNSC
ENSG00000251188.1.vs.ENSG00000186777.10	2	STAD,HNSC
ENSG00000189120.4.vs.ENSG00000141295.12	2	BLCA,BRCA
ENSG00000109208.4.vs.ENSG00000171201.9	1	THCA
ENSG00000270067.1.vs.ENSG00000249947.2	1	BRCA
ENSG00000187955.10.vs.ENSG00000254343.2	3	LIHC,STAD,BRCA
ENSG00000092295.10.vs.ENSG00000100949.13	1	STAD
ENSG00000241322.7.vs.ENSG00000259024.5	1	BRCA
ENSG00000165929.11.vs.ENSG00000140092.13	2	KIRC,UCEC
ENSG00000090447.10.vs.ENSG00000262468.4	1	STAD
ENSG00000125810.9.vs.ENSG00000279447.1	2	PRAD,KIRC
ENSG00000267045.1.vs.ENSG00000130201.6	2	PRAD,BRCA
ENSG00000204539.3.vs.ENSG00000204542.2	2	STAD,BLCA
ENSG00000165923.14.vs.ENSG00000109920.11	1	PRAD
ENSG00000185189.14.vs.ENSG00000179950.12	2	LUAD,LUSC
ENSG00000267179.1.vs.ENSG00000219665.7	1	COAD
ENSG00000232554.7.vs.ENSG00000227683.1	1	STAD
ENSG00000015285.9.vs.ENSG00000101945.15	5	LUSC,BLCA,COAD,HNSC,THCA
ENSG00000135457.8.vs.ENSG00000110925.5	2	COAD,KIRP
ENSG00000272141.1.vs.ENSG00000207607.2	5	STAD,BLCA,HNSC,KIRP,BRCA
ENSG00000215452.3.vs.ENSG00000225849.1	2	STAD,LUSC
ENSG00000163050.15.vs.ENSG00000143801.15	4	LIHC,LUSC,PRAD,HNSC
ENSG00000196337.9.vs.ENSG00000104848.1	1	BRCA
ENSG00000003989.15.vs.ENSG00000104213.11	2	LIHC,KIRC
ENSG00000171443.6.vs.ENSG00000261221.3	2	KIRC,BRCA
ENSG00000235349.1.vs.ENSG00000213642.3	1	KIRC
ENSG00000163497.2.vs.ENSG00000163499.10	2	STAD,PRAD
ENSG00000182057.4.vs.ENSG00000273366.1	2	LUAD,BRCA
ENSG00000140992.17.vs.ENSG00000162066.13	2	STAD,BRCA
ENSG00000176973.7.vs.ENSG00000173442.10	1	HNSC
ENSG00000233217.1.vs.ENSG00000163362.9	3	PRAD,KIRC,BRCA
ENSG00000250584.2.vs.ENSG00000279908.1	1	COAD
ENSG00000272040.1.vs.ENSG00000189045.12	1	BRCA
ENSG00000186130.4.vs.ENSG00000056586.14	1	STAD
ENSG00000110917.6.vs.ENSG00000277423.1	1	STAD
ENSG00000100918.11.vs.ENSG00000259529.1	2	LIHC,PRAD
ENSG00000241945.6.vs.ENSG00000160221.15	8	LUAD,LUSC,PRAD,BLCA,HNSC,KIRC,BRCA,UCEC
ENSG00000204099.10.vs.ENSG00000154252.11	2	LIHC,KIRC
ENSG00000117594.8.vs.ENSG00000123689.5	1	STAD
ENSG00000211786.3.vs.ENSG00000211785.1	4	LIHC,LUSC,PRAD,BRCA
ENSG00000279430.1.vs.ENSG00000158710.13	1	LUSC
ENSG00000272509.1.vs.ENSG00000164941.12	3	STAD,LUAD,BRCA
ENSG00000276535.1.vs.ENSG00000177910.7	1	STAD
ENSG00000130208.8.vs.ENSG00000214855.8	1	BLCA
ENSG00000120327.6.vs.ENSG00000187372.11	3	LUAD,HNSC,THCA
ENSG00000135925.7.vs.ENSG00000115596.3	5	LUSC,PRAD,BLCA,COAD,KIRC
ENSG00000109255.10.vs.ENSG00000163440.9	1	STAD
ENSG00000205360.6.vs.ENSG00000205361.7	1	LIHC
ENSG00000235974.1.vs.ENSG00000166704.10	1	STAD
ENSG00000170085.16.vs.ENSG00000250909.1	1	LUAD
ENSG00000254029.1.vs.ENSG00000254030.1	1	STAD
ENSG00000180532.9.vs.ENSG00000204519.9	2	STAD,PRAD
ENSG00000262001.1.vs.ENSG00000177337.6	1	COAD
ENSG00000120075.5.vs.ENSG00000108511.9	2	BLCA,HNSC
ENSG00000130703.14.vs.ENSG00000130706.11	1	KIRP
ENSG00000124541.6.vs.ENSG00000112640.13	2	KIRC,BRCA
ENSG00000241544.1.vs.ENSG00000241135.4	1	UCEC
ENSG00000164889.11.vs.ENSG00000213199.6	1	LUSC
ENSG00000263105.1.vs.ENSG00000185739.12	3	LIHC,LUAD,UCEC
ENSG00000095981.9.vs.ENSG00000164627.16	1	STAD
ENSG00000245148.2.vs.ENSG00000244134.1	1	BLCA
ENSG00000148346.10.vs.ENSG00000171159.4	4	LUAD,PRAD,HNSC,UCEC
ENSG00000077147.13.vs.ENSG00000155629.13	2	STAD,BRCA
ENSG00000125753.12.vs.ENSG00000213889.9	1	STAD
ENSG00000135828.10.vs.ENSG00000143333.6	2	LUAD,COAD
ENSG00000228648.1.vs.ENSG00000280707.1	1	UCEC
ENSG00000112208.11.vs.ENSG00000112200.15	1	LUSC
ENSG00000221983.6.vs.ENSG00000105700.9	2	LUSC,UCEC
ENSG00000240403.4.vs.ENSG00000221957.7	1	COAD
ENSG00000270472.2.vs.ENSG00000260048.2	1	STAD
ENSG00000280828.1.vs.ENSG00000281896.1	1	LUSC
ENSG00000162735.17.vs.ENSG00000224261.2	1	STAD
ENSG00000168453.13.vs.ENSG00000275074.1	3	LUSC,HNSC,BRCA
ENSG00000108946.13.vs.ENSG00000267461.1	1	STAD
ENSG00000268529.1.vs.ENSG00000197446.7	1	BLCA
ENSG00000272264.1.vs.ENSG00000076554.14	4	LUAD,LUSC,BLCA,UCEC
ENSG00000271013.1.vs.ENSG00000270977.1	5	STAD,LUSC,HNSC,BRCA,UCEC
ENSG00000185028.3.vs.ENSG00000153404.12	2	STAD,LUSC
ENSG00000221972.3.vs.ENSG00000174640.11	2	PRAD,BRCA
ENSG00000210195.2.vs.ENSG00000198886.2	1	KIRC
ENSG00000206754.1.vs.ENSG00000200534.1	2	LIHC,STAD
ENSG00000222533.1.vs.ENSG00000274525.1	1	STAD
ENSG00000217644.5.vs.ENSG00000239670.1	2	LUAD,THCA
ENSG00000231925.10.vs.ENSG00000204209.9	2	PRAD,COAD
ENSG00000177830.16.vs.ENSG00000250397.2	1	LIHC
ENSG00000274576.2.vs.ENSG00000254056.1	3	STAD,LUAD,BRCA
ENSG00000181378.12.vs.ENSG00000163499.10	1	LUAD
ENSG00000182531.7.vs.ENSG00000237470.3	1	BLCA
ENSG00000137496.16.vs.ENSG00000251143.1	2	BLCA,HNSC
ENSG00000241622.1.vs.ENSG00000236138.4	1	STAD
ENSG00000272866.1.vs.ENSG00000231967.1	1	KIRP
ENSG00000196417.11.vs.ENSG00000160336.13	2	STAD,BRCA
ENSG00000054598.6.vs.ENSG00000280916.1	1	KIRP
ENSG00000239674.2.vs.ENSG00000232707.1	1	PRAD
ENSG00000278967.1.vs.ENSG00000132855.4	2	STAD,KIRC
ENSG00000210195.2.vs.ENSG00000198899.2	1	KIRC
ENSG00000272153.1.vs.ENSG00000235169.6	1	STAD
ENSG00000280107.1.vs.ENSG00000226314.6	1	STAD
ENSG00000161513.10.vs.ENSG00000172782.10	1	THCA
ENSG00000079432.6.vs.ENSG00000188368.8	1	LUAD
ENSG00000010327.9.vs.ENSG00000010322.14	2	PRAD,BLCA
ENSG00000230033.1.vs.ENSG00000146909.6	1	BRCA
ENSG00000167757.12.vs.ENSG00000129451.10	3	PRAD,BLCA,KIRC
ENSG00000281550.1.vs.ENSG00000278263.2	1	STAD
ENSG00000279145.1.vs.ENSG00000137876.8	1	BRCA
ENSG00000108829.9.vs.ENSG00000279792.1	1	LIHC
ENSG00000211797.2.vs.ENSG00000211799.3	3	LUSC,PRAD,KIRC
ENSG00000229415.8.vs.ENSG00000136352.16	3	STAD,PRAD,UCEC
ENSG00000271569.1.vs.ENSG00000270252.1	1	LUAD
ENSG00000158747.12.vs.ENSG00000158748.3	1	KIRC
ENSG00000169714.15.vs.ENSG00000240682.8	1	KIRC
ENSG00000185201.15.vs.ENSG00000251661.3	1	THCA
ENSG00000162065.10.vs.ENSG00000185883.9	1	LUAD
ENSG00000123453.15.vs.ENSG00000225756.1	4	LIHC,STAD,BRCA,UCEC
ENSG00000130270.15.vs.ENSG00000079313.10	1	LUSC
ENSG00000181481.12.vs.ENSG00000266274.2	4	LIHC,STAD,LUAD,KIRC
ENSG00000108352.10.vs.ENSG00000108349.13	2	STAD,KIRC
ENSG00000279894.1.vs.ENSG00000133142.16	1	UCEC
ENSG00000264781.1.vs.ENSG00000211905.1	2	STAD,LUAD
ENSG00000233093.4.vs.ENSG00000102245.6	2	LIHC,LUSC
ENSG00000279799.1.vs.ENSG00000113621.13	4	LUAD,PRAD,THCA,UCEC
ENSG00000204316.11.vs.ENSG00000188878.15	2	STAD,COAD
ENSG00000166473.15.vs.ENSG00000140905.8	2	LIHC,KIRP
ENSG00000226321.5.vs.ENSG00000162804.12	4	LIHC,HNSC,KIRC,THCA
ENSG00000136485.13.vs.ENSG00000173826.13	1	BLCA
ENSG00000174482.9.vs.ENSG00000260412.1	4	STAD,LUSC,BLCA,BRCA
ENSG00000113716.11.vs.ENSG00000155850.7	3	LUAD,HNSC,THCA
ENSG00000256417.1.vs.ENSG00000255983.1	1	LUSC
ENSG00000148090.10.vs.ENSG00000273381.1	1	KIRC
ENSG00000154473.16.vs.ENSG00000188816.3	1	UCEC
ENSG00000120948.14.vs.ENSG00000271895.2	1	LIHC
ENSG00000261060.1.vs.ENSG00000227141.2	3	STAD,BLCA,BRCA
ENSG00000280237.1.vs.ENSG00000080854.13	1	BRCA
ENSG00000125746.13.vs.ENSG00000177464.4	3	LUAD,KIRC,BRCA
ENSG00000257184.3.vs.ENSG00000253508.1	1	STAD
ENSG00000264943.1.vs.ENSG00000250462.7	1	BRCA
ENSG00000120029.11.vs.ENSG00000120049.17	2	KIRC,UCEC
ENSG00000120669.14.vs.ENSG00000242715.6	2	STAD,KIRC
ENSG00000278570.3.vs.ENSG00000187720.13	2	BRCA,UCEC
ENSG00000185862.6.vs.ENSG00000126860.10	5	LIHC,LUAD,BLCA,COAD,BRCA
ENSG00000153982.9.vs.ENSG00000167447.11	1	STAD
ENSG00000237111.1.vs.ENSG00000265517.1	3	STAD,LUAD,UCEC
ENSG00000108375.11.vs.ENSG00000176160.8	2	LUSC,COAD
ENSG00000205746.8.vs.ENSG00000233024.6	1	PRAD
ENSG00000169344.14.vs.ENSG00000169340.8	1	STAD
ENSG00000231784.7.vs.ENSG00000167695.13	1	COAD
ENSG00000118160.12.vs.ENSG00000105419.16	2	LUAD,HNSC
ENSG00000147654.13.vs.ENSG00000205038.10	1	LUAD
ENSG00000275874.1.vs.ENSG00000261706.1	2	LUSC,COAD
ENSG00000267073.1.vs.ENSG00000205922.4	1	HNSC
ENSG00000142615.7.vs.ENSG00000162438.10	1	STAD
ENSG00000169884.12.vs.ENSG00000134287.8	1	LUSC
ENSG00000123975.4.vs.ENSG00000187742.13	2	LIHC,COAD
ENSG00000129450.7.vs.ENSG00000268581.1	1	KIRC
ENSG00000228709.1.vs.ENSG00000274225.1	1	HNSC
ENSG00000166250.10.vs.ENSG00000109971.12	2	LIHC,BLCA
ENSG00000145685.12.vs.ENSG00000113273.14	3	STAD,LUAD,KIRC
ENSG00000173369.14.vs.ENSG00000159189.10	6	LIHC,LUSC,BLCA,COAD,HNSC,BRCA
ENSG00000114854.6.vs.ENSG00000010319.5	2	LUAD,PRAD
ENSG00000131408.12.vs.ENSG00000062822.11	3	LIHC,LUAD,BRCA
ENSG00000211698.2.vs.ENSG00000233306.2	1	PRAD
ENSG00000226427.1.vs.ENSG00000206562.10	1	STAD
ENSG00000202441.2.vs.ENSG00000199036.1	1	THCA
ENSG00000163565.17.vs.ENSG00000265589.2	1	LUAD
ENSG00000237476.1.vs.ENSG00000099942.11	2	PRAD,THCA
ENSG00000233901.4.vs.ENSG00000268615.1	1	BRCA
ENSG00000261000.1.vs.ENSG00000263528.6	2	PRAD,BRCA
ENSG00000167414.4.vs.ENSG00000160013.7	2	LIHC,HNSC
ENSG00000197847.11.vs.ENSG00000014216.14	3	LUSC,PRAD,THCA
ENSG00000171861.9.vs.ENSG00000277491.1	2	STAD,COAD
ENSG00000233214.1.vs.ENSG00000232680.2	6	STAD,LUAD,LUSC,PRAD,HNSC,KIRC
ENSG00000265790.1.vs.ENSG00000205212.3	2	STAD,LUSC
ENSG00000221986.5.vs.ENSG00000134222.15	1	LIHC
ENSG00000070444.13.vs.ENSG00000263345.1	3	LIHC,BLCA,KIRC
ENSG00000242082.1.vs.ENSG00000224050.1	2	LUAD,HNSC
ENSG00000197256.9.vs.ENSG00000130158.12	4	STAD,LUSC,PRAD,THCA
ENSG00000253545.1.vs.ENSG00000211966.2	1	BRCA
ENSG00000136932.12.vs.ENSG00000136929.11	1	LUSC
ENSG00000221986.5.vs.ENSG00000134243.10	1	BLCA
ENSG00000114544.14.vs.ENSG00000144908.12	1	LUSC
ENSG00000180999.9.vs.ENSG00000197959.12	2	BLCA,COAD
ENSG00000207568.1.vs.ENSG00000166183.14	1	HNSC
ENSG00000059145.17.vs.ENSG00000260425.1	3	LIHC,LUAD,BRCA
ENSG00000242887.1.vs.ENSG00000263413.2	2	STAD,LUAD
ENSG00000211637.2.vs.ENSG00000253239.1	3	STAD,LUAD,HNSC
ENSG00000272072.1.vs.ENSG00000164597.12	2	STAD,LUSC
ENSG00000280184.1.vs.ENSG00000118496.4	1	HNSC
ENSG00000278041.1.vs.ENSG00000125820.5	2	STAD,PRAD
ENSG00000239713.6.vs.ENSG00000225720.5	2	LUSC,BLCA
ENSG00000253763.1.vs.ENSG00000211938.2	1	COAD
ENSG00000127412.5.vs.ENSG00000197993.6	1	LUSC
ENSG00000182866.15.vs.ENSG00000183615.5	2	LIHC,BRCA
ENSG00000265517.1.vs.ENSG00000237547.1	2	STAD,LUAD
ENSG00000012211.11.vs.ENSG00000279422.1	1	BLCA
ENSG00000148399.10.vs.ENSG00000165724.5	3	LIHC,COAD,HNSC
ENSG00000102057.8.vs.ENSG00000068308.12	1	COAD
ENSG00000159387.7.vs.ENSG00000263207.2	1	KIRP
ENSG00000242866.8.vs.ENSG00000166762.15	1	KIRP
ENSG00000234160.1.vs.ENSG00000137054.14	2	LUSC,UCEC
ENSG00000204421.2.vs.ENSG00000213722.7	1	BLCA
ENSG00000088367.19.vs.ENSG00000131043.10	3	STAD,KIRP,BRCA
ENSG00000170949.16.vs.ENSG00000170954.10	2	STAD,HNSC
ENSG00000170482.15.vs.ENSG00000170476.14	1	BRCA
ENSG00000144868.12.vs.ENSG00000170819.4	1	STAD
ENSG00000224784.2.vs.ENSG00000143546.8	1	HNSC
ENSG00000264522.4.vs.ENSG00000143368.9	1	KIRP
ENSG00000254029.1.vs.ENSG00000211677.2	1	STAD
ENSG00000271980.1.vs.ENSG00000164237.7	2	LUSC,PRAD
ENSG00000167741.9.vs.ENSG00000132382.13	2	LUAD,BRCA
ENSG00000251819.1.vs.ENSG00000270127.2	3	LIHC,COAD,KIRC
ENSG00000169344.14.vs.ENSG00000169347.15	1	STAD
ENSG00000228115.1.vs.ENSG00000235330.2	2	LUAD,KIRC
ENSG00000250378.1.vs.ENSG00000145832.11	1	BRCA
ENSG00000260669.2.vs.ENSG00000278784.1	1	BRCA
ENSG00000210049.1.vs.ENSG00000198888.2	2	LIHC,KIRC
ENSG00000260114.2.vs.ENSG00000279789.1	2	LIHC,BRCA
ENSG00000272516.1.vs.ENSG00000269897.4	1	BRCA
ENSG00000100147.12.vs.ENSG00000198911.10	1	BRCA
ENSG00000254264.2.vs.ENSG00000253481.2	1	LUAD
ENSG00000043143.19.vs.ENSG00000240250.3	1	STAD
ENSG00000188263.9.vs.ENSG00000138892.10	2	STAD,LUSC
ENSG00000013561.16.vs.ENSG00000271871.1	2	LUAD,PRAD
ENSG00000259376.1.vs.ENSG00000259755.1	3	STAD,KIRC,THCA
ENSG00000214822.7.vs.ENSG00000230088.1	1	BLCA
ENSG00000167800.9.vs.ENSG00000255318.1	1	BLCA
ENSG00000272362.1.vs.ENSG00000224939.1	1	HNSC
ENSG00000273891.1.vs.ENSG00000276742.1	1	BRCA
ENSG00000175066.14.vs.ENSG00000114126.16	2	HNSC,KIRC
ENSG00000255622.3.vs.ENSG00000113205.4	4	STAD,LUAD,HNSC,THCA
ENSG00000120328.6.vs.ENSG00000187372.11	3	LUAD,HNSC,THCA
ENSG00000167992.11.vs.ENSG00000167986.12	1	LUAD
ENSG00000188393.7.vs.ENSG00000225231.1	2	LUSC,BLCA
ENSG00000185038.13.vs.ENSG00000241635.6	1	PRAD
ENSG00000063127.14.vs.ENSG00000197813.5	4	STAD,LUAD,COAD,BRCA
ENSG00000164188.7.vs.ENSG00000152620.11	3	COAD,KIRC,BRCA
ENSG00000227018.1.vs.ENSG00000179277.9	1	LUAD
ENSG00000278705.1.vs.ENSG00000278463.1	1	LUAD
ENSG00000160117.13.vs.ENSG00000130312.5	2	LIHC,LUSC
ENSG00000131475.5.vs.ENSG00000126562.15	1	PRAD
ENSG00000213937.3.vs.ENSG00000272079.2	4	STAD,BLCA,KIRP,BRCA
ENSG00000069712.10.vs.ENSG00000273487.1	1	KIRP
ENSG00000211899.6.vs.ENSG00000211898.6	1	STAD
ENSG00000261888.1.vs.ENSG00000274370.1	7	STAD,LUSC,PRAD,HNSC,KIRC,KIRP,BRCA
ENSG00000100065.13.vs.ENSG00000100060.16	2	LUAD,COAD
ENSG00000104957.12.vs.ENSG00000037757.12	2	LIHC,LUSC
ENSG00000231177.4.vs.ENSG00000157014.9	1	BLCA
ENSG00000147586.8.vs.ENSG00000272264.1	1	LUAD
ENSG00000179941.6.vs.ENSG00000091039.15	2	KIRC,BRCA
ENSG00000167700.7.vs.ENSG00000160972.8	3	LUAD,COAD,KIRC
ENSG00000232810.3.vs.ENSG00000226979.7	1	LIHC
ENSG00000249476.1.vs.ENSG00000198961.8	1	LUAD
ENSG00000211751.6.vs.ENSG00000211767.1	1	BLCA
ENSG00000240849.9.vs.ENSG00000244687.10	1	STAD
ENSG00000100097.10.vs.ENSG00000273899.3	1	BRCA
ENSG00000148832.13.vs.ENSG00000148824.17	2	KIRP,UCEC
ENSG00000197647.10.vs.ENSG00000257446.3	3	LIHC,STAD,LUSC
ENSG00000127884.4.vs.ENSG00000148803.10	1	UCEC
ENSG00000116039.10.vs.ENSG00000116035.2	2	STAD,THCA
ENSG00000254604.1.vs.ENSG00000255329.1	1	LUSC
ENSG00000242020.3.vs.ENSG00000240764.3	1	STAD
ENSG00000253691.2.vs.ENSG00000230481.2	1	STAD
ENSG00000095261.12.vs.ENSG00000270917.1	1	BRCA
ENSG00000110243.10.vs.ENSG00000109917.9	1	THCA
ENSG00000167994.10.vs.ENSG00000221968.7	2	LUAD,PRAD
ENSG00000100142.13.vs.ENSG00000100139.12	4	LUAD,HNSC,BRCA,UCEC
ENSG00000278616.1.vs.ENSG00000244733.5	2	LIHC,BRCA
ENSG00000252936.1.vs.ENSG00000276599.1	1	UCEC
ENSG00000167800.9.vs.ENSG00000167799.8	1	BRCA
ENSG00000213231.11.vs.ENSG00000187621.13	1	STAD
ENSG00000136819.13.vs.ENSG00000136827.11	4	LIHC,STAD,LUSC,UCEC
ENSG00000170540.13.vs.ENSG00000134419.14	1	COAD
ENSG00000203877.6.vs.ENSG00000065615.12	1	COAD
ENSG00000179583.16.vs.ENSG00000280153.1	4	LUSC,BLCA,KIRP,THCA
ENSG00000211677.2.vs.ENSG00000211679.2	2	STAD,PRAD
ENSG00000254176.1.vs.ENSG00000253247.1	3	STAD,BLCA,BRCA
ENSG00000273164.1.vs.ENSG00000273032.1	3	STAD,LUSC,THCA
ENSG00000280239.1.vs.ENSG00000167670.14	2	LIHC,PRAD
ENSG00000261787.1.vs.ENSG00000178125.13	2	KIRC,BRCA
ENSG00000105829.10.vs.ENSG00000278959.1	1	LUSC
ENSG00000238460.1.vs.ENSG00000255122.1	1	UCEC
ENSG00000211714.3.vs.ENSG00000239944.1	1	KIRP
ENSG00000119335.15.vs.ENSG00000160447.6	2	COAD,HNSC
ENSG00000166863.10.vs.ENSG00000166860.2	1	LUSC
ENSG00000251819.1.vs.ENSG00000154227.12	2	COAD,KIRC
ENSG00000268520.1.vs.ENSG00000160318.5	1	LIHC
ENSG00000103043.13.vs.ENSG00000132613.13	3	STAD,PRAD,KIRC
ENSG00000264067.1.vs.ENSG00000273388.1	3	LUSC,COAD,BRCA
ENSG00000280335.1.vs.ENSG00000264269.1	1	BRCA
ENSG00000011143.15.vs.ENSG00000278627.1	1	BLCA
ENSG00000211814.1.vs.ENSG00000211815.3	1	LUSC
ENSG00000171219.8.vs.ENSG00000110047.16	1	THCA
ENSG00000255508.6.vs.ENSG00000124942.12	1	LUAD
ENSG00000168071.20.vs.ENSG00000162302.11	1	LIHC
ENSG00000164951.14.vs.ENSG00000254387.1	1	COAD
ENSG00000166592.10.vs.ENSG00000166589.11	2	LUAD,PRAD
ENSG00000172785.17.vs.ENSG00000231808.2	1	PRAD
ENSG00000242953.1.vs.ENSG00000244699.1	2	STAD,KIRC
ENSG00000101052.11.vs.ENSG00000101049.13	3	BLCA,KIRP,UCEC
ENSG00000230587.1.vs.ENSG00000207087.1	1	STAD
ENSG00000105323.15.vs.ENSG00000142039.3	2	LUAD,BRCA
ENSG00000272159.1.vs.ENSG00000077782.18	1	BRCA
ENSG00000214770.2.vs.ENSG00000234911.1	1	COAD
ENSG00000213762.9.vs.ENSG00000183647.9	2	STAD,BRCA
ENSG00000267904.1.vs.ENSG00000269044.2	2	LUSC,PRAD
ENSG00000185527.10.vs.ENSG00000182446.12	1	KIRC
ENSG00000252469.1.vs.ENSG00000258851.1	1	THCA
ENSG00000212452.1.vs.ENSG00000212493.1	3	STAD,LUSC,BLCA
ENSG00000272102.1.vs.ENSG00000085377.12	1	LIHC
ENSG00000266805.1.vs.ENSG00000273352.1	1	BRCA
ENSG00000251155.2.vs.ENSG00000260404.2	1	STAD
ENSG00000057468.6.vs.ENSG00000137955.14	4	STAD,LUSC,KIRP,THCA
ENSG00000256508.2.vs.ENSG00000261276.1	1	STAD
ENSG00000199961.1.vs.ENSG00000214140.9	1	STAD
ENSG00000261643.1.vs.ENSG00000163956.9	1	BLCA
ENSG00000132554.18.vs.ENSG00000156509.12	1	BRCA
ENSG00000213512.1.vs.ENSG00000162654.8	4	LUSC,HNSC,KIRC,KIRP
ENSG00000240625.3.vs.ENSG00000272223.1	1	LUSC
ENSG00000185633.9.vs.ENSG00000185482.6	1	PRAD
ENSG00000261888.1.vs.ENSG00000176845.11	2	PRAD,HNSC
ENSG00000234479.2.vs.ENSG00000100170.8	1	PRAD
ENSG00000108840.14.vs.ENSG00000161654.8	3	BLCA,COAD,KIRC
ENSG00000243406.5.vs.ENSG00000136098.15	2	STAD,BRCA
ENSG00000253359.1.vs.ENSG00000211957.2	1	STAD
ENSG00000271888.1.vs.ENSG00000235488.1	2	STAD,COAD
ENSG00000188086.11.vs.ENSG00000261603.1	3	LIHC,STAD,KIRP
ENSG00000237111.1.vs.ENSG00000211905.1	2	STAD,LUAD
ENSG00000198840.2.vs.ENSG00000209082.1	2	LIHC,PRAD
ENSG00000209082.1.vs.ENSG00000212907.2	2	LIHC,PRAD
ENSG00000253742.1.vs.ENSG00000211968.3	1	LUAD
ENSG00000100427.14.vs.ENSG00000138892.10	1	STAD
ENSG00000132004.11.vs.ENSG00000095059.14	3	LUSC,COAD,UCEC
ENSG00000166529.13.vs.ENSG00000106261.15	2	LUAD,PRAD
ENSG00000240800.1.vs.ENSG00000234918.1	1	BRCA
ENSG00000225091.3.vs.ENSG00000201512.1	3	LIHC,LUSC,BLCA
ENSG00000224490.4.vs.ENSG00000236107.6	1	KIRP
ENSG00000162728.4.vs.ENSG00000225279.1	2	STAD,UCEC
ENSG00000163702.17.vs.ENSG00000269894.1	2	LIHC,STAD
ENSG00000132326.10.vs.ENSG00000232306.1	1	STAD
ENSG00000099812.7.vs.ENSG00000099864.16	1	KIRC
ENSG00000184574.8.vs.ENSG00000111644.6	2	LIHC,LUAD
ENSG00000078081.6.vs.ENSG00000078070.10	2	LUSC,BRCA
ENSG00000142748.11.vs.ENSG00000142733.13	1	LUSC
ENSG00000268355.1.vs.ENSG00000270164.1	3	LUAD,PRAD,BRCA
ENSG00000176148.14.vs.ENSG00000121690.8	2	STAD,BLCA
ENSG00000253540.4.vs.ENSG00000248243.1	1	HNSC
ENSG00000125861.13.vs.ENSG00000149451.16	1	THCA
ENSG00000233155.1.vs.ENSG00000114993.14	1	KIRC
ENSG00000259337.4.vs.ENSG00000188403.7	1	LUAD
ENSG00000228651.1.vs.ENSG00000165471.6	1	KIRC
ENSG00000241860.5.vs.ENSG00000269981.1	1	LUAD
ENSG00000253356.1.vs.ENSG00000129691.14	1	HNSC
ENSG00000121775.16.vs.ENSG00000025800.12	1	LIHC
ENSG00000149262.15.vs.ENSG00000255449.1	1	LUAD
ENSG00000188886.3.vs.ENSG00000274286.1	4	STAD,LUSC,COAD,BRCA
ENSG00000255366.1.vs.ENSG00000254348.1	4	STAD,LUAD,HNSC,KIRP
ENSG00000242371.1.vs.ENSG00000273962.1	1	STAD
ENSG00000213625.7.vs.ENSG00000116675.14	1	LUSC
ENSG00000167074.13.vs.ENSG00000100403.11	2	LUAD,BRCA
ENSG00000126254.10.vs.ENSG00000105672.13	2	LIHC,BRCA
ENSG00000100568.9.vs.ENSG00000072042.11	1	KIRP
ENSG00000138794.8.vs.ENSG00000123739.9	2	KIRP,BRCA
ENSG00000135372.7.vs.ENSG00000135387.18	1	LUSC
ENSG00000261829.1.vs.ENSG00000204128.5	4	PRAD,BLCA,KIRP,BRCA
ENSG00000276995.1.vs.ENSG00000196535.13	2	HNSC,BRCA
ENSG00000183605.15.vs.ENSG00000165672.6	3	LUAD,BRCA,UCEC
ENSG00000125498.18.vs.ENSG00000243772.5	1	BRCA
ENSG00000260948.1.vs.ENSG00000243960.1	1	LUSC
ENSG00000259542.4.vs.ENSG00000259614.2	1	STAD
ENSG00000250282.1.vs.ENSG00000275025.1	3	LIHC,COAD,THCA
ENSG00000167703.13.vs.ENSG00000174238.13	1	HNSC
ENSG00000105642.14.vs.ENSG00000007080.9	1	THCA
ENSG00000230148.7.vs.ENSG00000239552.2	1	HNSC
ENSG00000005961.16.vs.ENSG00000161682.13	1	STAD
ENSG00000263751.1.vs.ENSG00000211904.2	1	LUAD
ENSG00000161956.11.vs.ENSG00000239697.9	2	PRAD,COAD
ENSG00000224460.1.vs.ENSG00000229017.5	1	LUAD
ENSG00000255202.1.vs.ENSG00000205177.6	2	LIHC,BRCA
ENSG00000231560.1.vs.ENSG00000225231.1	2	STAD,LUSC
ENSG00000260841.1.vs.ENSG00000131446.14	1	PRAD
ENSG00000068137.13.vs.ENSG00000267765.1	1	STAD
ENSG00000226900.1.vs.ENSG00000229081.1	1	UCEC
ENSG00000198435.3.vs.ENSG00000260996.1	2	PRAD,BRCA
ENSG00000144230.15.vs.ENSG00000169994.17	3	LUSC,PRAD,COAD
ENSG00000125046.13.vs.ENSG00000180914.9	1	PRAD
ENSG00000272498.1.vs.ENSG00000272529.1	2	STAD,BLCA
ENSG00000003400.13.vs.ENSG00000064012.20	2	STAD,PRAD
ENSG00000188266.12.vs.ENSG00000041357.14	2	BRCA,UCEC
ENSG00000124701.5.vs.ENSG00000112212.10	3	LIHC,LUSC,HNSC
ENSG00000126218.10.vs.ENSG00000126231.12	3	LIHC,STAD,KIRP
ENSG00000213971.6.vs.ENSG00000269837.1	1	STAD
ENSG00000143398.18.vs.ENSG00000159352.14	2	LIHC,LUAD
ENSG00000180879.12.vs.ENSG00000184343.9	1	LIHC
ENSG00000185873.7.vs.ENSG00000250026.4	1	LUSC
ENSG00000167536.12.vs.ENSG00000109118.12	2	STAD,BRCA
ENSG00000214050.6.vs.ENSG00000253690.1	1	STAD
ENSG00000174444.13.vs.ENSG00000261351.2	2	LIHC,BRCA
ENSG00000196072.10.vs.ENSG00000107593.16	3	STAD,KIRC,BRCA
ENSG00000188895.10.vs.ENSG00000108349.13	2	STAD,BRCA
ENSG00000204010.3.vs.ENSG00000185745.9	1	HNSC
ENSG00000165240.16.vs.ENSG00000131174.4	3	HNSC,BRCA,UCEC
ENSG00000010610.8.vs.ENSG00000110811.18	1	LIHC
ENSG00000233041.7.vs.ENSG00000140323.5	2	STAD,PRAD
ENSG00000055957.9.vs.ENSG00000162267.11	2	BLCA,KIRC
ENSG00000209082.1.vs.ENSG00000198786.2	4	LIHC,PRAD,COAD,KIRC
ENSG00000161031.11.vs.ENSG00000105122.11	2	LUSC,BLCA
ENSG00000211753.3.vs.ENSG00000211766.1	2	LUSC,BRCA
ENSG00000216331.1.vs.ENSG00000276966.1	3	LUSC,PRAD,HNSC
ENSG00000187024.12.vs.ENSG00000279571.1	1	LUAD
ENSG00000267048.1.vs.ENSG00000258947.5	1	LUAD
ENSG00000279068.1.vs.ENSG00000113212.6	1	HNSC
ENSG00000077147.13.vs.ENSG00000095587.8	2	LUAD,UCEC
ENSG00000115850.8.vs.ENSG00000076003.4	1	PRAD
ENSG00000113552.14.vs.ENSG00000254099.1	1	KIRC
ENSG00000128578.8.vs.ENSG00000158467.15	2	LUSC,HNSC
ENSG00000237701.1.vs.ENSG00000092377.12	1	COAD
ENSG00000167100.13.vs.ENSG00000108819.10	2	LIHC,BLCA
ENSG00000272444.1.vs.ENSG00000271780.1	3	LUAD,COAD,HNSC
ENSG00000168993.13.vs.ENSG00000249592.4	2	LIHC,COAD
ENSG00000084092.6.vs.ENSG00000269949.1	1	LUAD
ENSG00000112964.12.vs.ENSG00000270513.1	1	KIRC
ENSG00000211772.7.vs.ENSG00000270672.1	1	PRAD
ENSG00000249721.1.vs.ENSG00000250421.4	2	LUSC,PRAD
ENSG00000259618.1.vs.ENSG00000170236.13	1	STAD
ENSG00000211979.2.vs.ENSG00000275747.1	1	UCEC
ENSG00000145819.14.vs.ENSG00000236714.1	1	LUAD
ENSG00000165028.10.vs.ENSG00000136783.9	1	BRCA
ENSG00000197081.11.vs.ENSG00000175003.11	1	COAD
ENSG00000186517.12.vs.ENSG00000215845.9	2	LIHC,BRCA
ENSG00000233559.1.vs.ENSG00000273319.1	2	STAD,LUAD
ENSG00000204524.6.vs.ENSG00000105146.11	1	STAD
ENSG00000186272.11.vs.ENSG00000188785.10	4	LIHC,STAD,LUSC,BRCA
ENSG00000265517.1.vs.ENSG00000211905.1	2	STAD,LUAD
ENSG00000211810.3.vs.ENSG00000259092.1	3	LUSC,KIRP,BRCA
ENSG00000272382.1.vs.ENSG00000215068.6	2	PRAD,BRCA
ENSG00000236878.1.vs.ENSG00000234065.2	1	COAD
ENSG00000278705.1.vs.ENSG00000274267.1	1	LUAD
ENSG00000167619.10.vs.ENSG00000188368.8	2	COAD,KIRC
ENSG00000196976.6.vs.ENSG00000126903.14	4	LIHC,STAD,BLCA,HNSC
ENSG00000100335.11.vs.ENSG00000128268.11	2	LUAD,BLCA
ENSG00000109063.13.vs.ENSG00000261433.1	1	STAD
ENSG00000211804.3.vs.ENSG00000211805.1	4	BLCA,HNSC,KIRC,BRCA
ENSG00000204362.5.vs.ENSG00000142623.9	3	LUAD,COAD,KIRP
ENSG00000159625.13.vs.ENSG00000140854.11	2	HNSC,KIRP
ENSG00000180901.9.vs.ENSG00000232724.1	2	LUAD,BRCA
ENSG00000204604.8.vs.ENSG00000268225.1	2	PRAD,BRCA
ENSG00000259820.1.vs.ENSG00000279518.1	1	LUAD
ENSG00000237515.7.vs.ENSG00000262801.4	3	LIHC,PRAD,BRCA
ENSG00000271843.1.vs.ENSG00000163636.9	2	LIHC,KIRP
ENSG00000103168.15.vs.ENSG00000250685.6	2	PRAD,HNSC
ENSG00000172728.14.vs.ENSG00000272338.2	1	LUAD
ENSG00000120709.9.vs.ENSG00000120733.12	2	LUAD,BRCA
ENSG00000198569.8.vs.ENSG00000188229.5	3	BLCA,HNSC,KIRC
ENSG00000185418.14.vs.ENSG00000184277.11	4	COAD,HNSC,BRCA,UCEC
ENSG00000110169.9.vs.ENSG00000110171.17	2	COAD,BRCA
ENSG00000131471.5.vs.ENSG00000260105.5	2	LUSC,THCA
ENSG00000224373.3.vs.ENSG00000211968.3	1	BRCA
ENSG00000196109.6.vs.ENSG00000269345.1	3	STAD,BRCA,UCEC
ENSG00000238268.2.vs.ENSG00000214402.6	1	PRAD
ENSG00000105997.21.vs.ENSG00000105996.6	1	THCA
ENSG00000162194.11.vs.ENSG00000162191.12	2	LUSC,COAD
ENSG00000007264.12.vs.ENSG00000105278.9	2	LIHC,LUAD
ENSG00000139908.13.vs.ENSG00000276698.1	1	BRCA
ENSG00000172061.8.vs.ENSG00000178772.6	1	HNSC
ENSG00000178752.14.vs.ENSG00000168427.8	1	BRCA
ENSG00000140545.13.vs.ENSG00000140511.10	3	LIHC,STAD,LUAD
ENSG00000189269.11.vs.ENSG00000234353.2	1	STAD
ENSG00000211751.6.vs.ENSG00000211771.1	3	LUAD,LUSC,BLCA
ENSG00000209082.1.vs.ENSG00000198899.2	3	LIHC,PRAD,KIRC
ENSG00000120328.6.vs.ENSG00000197479.6	3	LUAD,HNSC,THCA
ENSG00000167123.17.vs.ENSG00000228510.2	1	HNSC
ENSG00000128610.10.vs.ENSG00000081803.14	1	HNSC
ENSG00000268655.1.vs.ENSG00000104826.10	1	HNSC
ENSG00000186204.13.vs.ENSG00000186529.13	2	PRAD,THCA
ENSG00000141198.12.vs.ENSG00000275710.1	3	LIHC,LUAD,BLCA
ENSG00000187492.7.vs.ENSG00000182179.9	1	PRAD
ENSG00000250264.1.vs.ENSG00000168394.10	1	BRCA
ENSG00000115808.10.vs.ENSG00000279519.1	2	LUAD,COAD
ENSG00000237259.1.vs.ENSG00000230010.1	1	UCEC
ENSG00000260001.5.vs.ENSG00000104976.10	5	LUSC,PRAD,COAD,HNSC,BRCA
ENSG00000250421.4.vs.ENSG00000250669.1	2	LUSC,PRAD
ENSG00000275322.1.vs.ENSG00000259275.2	4	STAD,LUAD,KIRP,BRCA
ENSG00000276775.1.vs.ENSG00000211935.3	2	BLCA,BRCA
ENSG00000103544.13.vs.ENSG00000174628.15	1	KIRP
ENSG00000162892.14.vs.ENSG00000271680.1	1	LUAD
ENSG00000278730.1.vs.ENSG00000274561.1	2	STAD,LUAD
ENSG00000146409.9.vs.ENSG00000112303.12	1	STAD
ENSG00000261829.1.vs.ENSG00000173692.11	1	BLCA
ENSG00000136286.13.vs.ENSG00000260997.1	3	LUAD,KIRC,BRCA
ENSG00000221870.2.vs.ENSG00000185985.8	1	KIRC
ENSG00000136286.13.vs.ENSG00000232956.7	1	BLCA
ENSG00000198853.10.vs.ENSG00000179766.16	1	LUSC
ENSG00000245532.5.vs.ENSG00000173727.10	2	KIRC,KIRP
ENSG00000080224.16.vs.ENSG00000261292.2	3	PRAD,KIRP,BRCA
ENSG00000241635.6.vs.ENSG00000248705.1	1	KIRC
ENSG00000204394.11.vs.ENSG00000204392.9	2	LUSC,BRCA
ENSG00000138759.16.vs.ENSG00000138772.11	4	LIHC,LUAD,BLCA,COAD
ENSG00000186212.3.vs.ENSG00000270244.1	1	KIRC
ENSG00000272908.1.vs.ENSG00000249978.1	3	LUSC,PRAD,BRCA
ENSG00000158863.20.vs.ENSG00000158856.16	1	HNSC
ENSG00000146410.10.vs.ENSG00000237596.5	2	LIHC,COAD
ENSG00000095485.15.vs.ENSG00000196072.10	2	STAD,UCEC
ENSG00000237111.1.vs.ENSG00000237547.1	2	STAD,LUAD
ENSG00000275995.1.vs.ENSG00000278448.1	1	BRCA
ENSG00000265714.1.vs.ENSG00000263413.2	2	STAD,LUAD
ENSG00000251451.1.vs.ENSG00000179406.6	1	UCEC
ENSG00000213937.3.vs.ENSG00000006327.12	2	STAD,BRCA
ENSG00000273899.3.vs.ENSG00000100106.18	1	BRCA
ENSG00000271984.1.vs.ENSG00000124257.6	1	BLCA
ENSG00000171199.8.vs.ENSG00000171201.9	1	BRCA
ENSG00000104805.14.vs.ENSG00000260366.1	1	LUAD
ENSG00000254228.1.vs.ENSG00000228966.2	1	STAD
ENSG00000186409.13.vs.ENSG00000171960.9	1	BRCA
ENSG00000175602.3.vs.ENSG00000172543.6	4	LIHC,LUAD,KIRC,THCA
ENSG00000270210.1.vs.ENSG00000075426.10	2	LUSC,THCA
ENSG00000196923.12.vs.ENSG00000146094.12	2	LIHC,LUAD
ENSG00000249684.4.vs.ENSG00000280207.1	1	STAD
ENSG00000140367.10.vs.ENSG00000167196.12	2	KIRC,BRCA
ENSG00000119737.5.vs.ENSG00000265452.1	1	PRAD
ENSG00000265612.1.vs.ENSG00000237547.1	2	STAD,LUAD
ENSG00000153363.11.vs.ENSG00000082512.13	2	BRCA,THCA
ENSG00000128272.13.vs.ENSG00000100335.11	2	LUSC,BRCA
ENSG00000280859.1.vs.ENSG00000209482.1	3	LUSC,BLCA,HNSC
ENSG00000101460.11.vs.ENSG00000125971.15	1	STAD
ENSG00000167749.10.vs.ENSG00000197588.8	3	BLCA,COAD,BRCA
ENSG00000111196.8.vs.ENSG00000256667.5	1	LIHC
ENSG00000198218.9.vs.ENSG00000178149.15	2	STAD,HNSC
ENSG00000215572.2.vs.ENSG00000238132.2	1	STAD
ENSG00000128567.15.vs.ENSG00000273489.1	1	PRAD
ENSG00000004975.10.vs.ENSG00000199053.2	2	STAD,LUSC
ENSG00000115841.18.vs.ENSG00000232973.10	3	KIRC,BRCA,UCEC
ENSG00000143318.11.vs.ENSG00000162734.11	2	LUAD,PRAD
ENSG00000235505.6.vs.ENSG00000204403.8	2	BRCA,UCEC
ENSG00000261338.2.vs.ENSG00000179921.13	1	LIHC
ENSG00000156413.12.vs.ENSG00000171124.11	2	STAD,KIRC
ENSG00000227113.2.vs.ENSG00000226002.1	1	LUSC
ENSG00000187736.11.vs.ENSG00000272644.1	1	STAD
ENSG00000105227.13.vs.ENSG00000160396.8	1	PRAD
ENSG00000142065.12.vs.ENSG00000232677.5	1	BRCA
ENSG00000167077.11.vs.ENSG00000100147.12	1	LIHC
ENSG00000263956.4.vs.ENSG00000227733.7	1	LIHC
ENSG00000279821.1.vs.ENSG00000113758.12	2	LUAD,COAD
ENSG00000003402.18.vs.ENSG00000003400.13	2	STAD,HNSC
ENSG00000260645.1.vs.ENSG00000233967.5	4	LIHC,HNSC,KIRC,THCA
ENSG00000205593.10.vs.ENSG00000196576.13	4	LIHC,HNSC,THCA,UCEC
ENSG00000260790.1.vs.ENSG00000230872.1	2	STAD,BRCA
ENSG00000248734.2.vs.ENSG00000153113.22	1	STAD
ENSG00000162896.5.vs.ENSG00000162894.10	3	LIHC,PRAD,THCA
ENSG00000089692.7.vs.ENSG00000010610.8	3	BLCA,COAD,BRCA
ENSG00000262098.1.vs.ENSG00000262873.1	2	LUSC,PRAD
ENSG00000067992.11.vs.ENSG00000260822.1	3	STAD,PRAD,BLCA
ENSG00000163466.14.vs.ENSG00000179921.13	1	LIHC
ENSG00000254030.1.vs.ENSG00000222037.5	1	STAD
ENSG00000088899.13.vs.ENSG00000215251.3	1	KIRP
ENSG00000105058.10.vs.ENSG00000072958.7	1	STAD
ENSG00000229375.1.vs.ENSG00000187721.8	1	STAD
ENSG00000267355.2.vs.ENSG00000035862.11	1	BRCA
ENSG00000187239.15.vs.ENSG00000224988.1	1	LUSC
ENSG00000132010.14.vs.ENSG00000242615.1	2	STAD,THCA
ENSG00000179820.14.vs.ENSG00000126583.9	2	LUAD,KIRP
ENSG00000178773.13.vs.ENSG00000167526.12	2	STAD,HNSC
ENSG00000116032.5.vs.ENSG00000065268.9	2	STAD,HNSC
ENSG00000232346.1.vs.ENSG00000100170.8	1	THCA
ENSG00000135452.8.vs.ENSG00000255737.2	3	LIHC,STAD,HNSC
ENSG00000120784.14.vs.ENSG00000198182.11	1	BRCA
ENSG00000185090.13.vs.ENSG00000197982.13	1	UCEC
ENSG00000261863.1.vs.ENSG00000188176.10	2	LUAD,HNSC
ENSG00000261087.1.vs.ENSG00000120963.10	6	STAD,LUSC,PRAD,COAD,HNSC,KIRC
ENSG00000211670.2.vs.ENSG00000211669.2	1	PRAD
ENSG00000114770.15.vs.ENSG00000233441.5	2	STAD,BLCA
ENSG00000234353.2.vs.ENSG00000244723.3	5	LIHC,STAD,LUSC,KIRC,BRCA
ENSG00000279667.1.vs.ENSG00000260920.2	2	BRCA,THCA
ENSG00000272825.1.vs.ENSG00000227039.5	3	STAD,KIRC,KIRP
ENSG00000077713.17.vs.ENSG00000252147.1	2	STAD,HNSC
ENSG00000274391.3.vs.ENSG00000187172.14	2	LIHC,STAD
ENSG00000206195.9.vs.ENSG00000225255.5	1	BRCA
ENSG00000071626.15.vs.ENSG00000268798.1	1	LIHC
ENSG00000147912.11.vs.ENSG00000175768.11	1	LIHC
ENSG00000271347.1.vs.ENSG00000279192.1	1	PRAD
ENSG00000132155.10.vs.ENSG00000274514.1	1	STAD
ENSG00000198315.9.vs.ENSG00000226314.6	2	STAD,BRCA
ENSG00000268836.1.vs.ENSG00000007392.15	2	KIRC,BRCA
ENSG00000164850.13.vs.ENSG00000224079.1	1	HNSC
ENSG00000273971.1.vs.ENSG00000262583.1	2	STAD,COAD
ENSG00000143217.8.vs.ENSG00000186517.12	1	LIHC
ENSG00000242887.1.vs.ENSG00000265517.1	2	STAD,LUAD
ENSG00000261222.2.vs.ENSG00000182352.7	1	STAD
ENSG00000090924.13.vs.ENSG00000128016.5	2	LUAD,PRAD
ENSG00000265517.1.vs.ENSG00000211904.2	1	LUAD
ENSG00000095970.15.vs.ENSG00000161911.10	1	THCA
ENSG00000196116.7.vs.ENSG00000136842.12	2	LUAD,COAD
ENSG00000250271.1.vs.ENSG00000114771.12	1	UCEC
ENSG00000270060.1.vs.ENSG00000165912.14	1	COAD
ENSG00000136908.16.vs.ENSG00000167106.10	3	LIHC,STAD,UCEC
ENSG00000270097.1.vs.ENSG00000262152.5	1	BRCA
ENSG00000224034.1.vs.ENSG00000215267.7	1	STAD
ENSG00000198113.2.vs.ENSG00000188986.4	3	STAD,HNSC,KIRC
ENSG00000136485.13.vs.ENSG00000136463.7	2	BLCA,BRCA
ENSG00000178401.13.vs.ENSG00000123352.16	2	PRAD,UCEC
ENSG00000273325.1.vs.ENSG00000224050.1	1	LUAD
ENSG00000236567.2.vs.ENSG00000236254.1	1	STAD
ENSG00000244187.6.vs.ENSG00000213213.12	2	HNSC,BRCA
ENSG00000254046.1.vs.ENSG00000211944.2	2	STAD,LUAD
ENSG00000100490.8.vs.ENSG00000012983.10	1	HNSC
ENSG00000270000.1.vs.ENSG00000259005.1	2	LUAD,LUSC
ENSG00000275580.1.vs.ENSG00000276593.1	1	LUAD
ENSG00000005961.16.vs.ENSG00000186566.10	1	PRAD
ENSG00000224272.2.vs.ENSG00000215023.2	2	LIHC,LUAD
ENSG00000230612.2.vs.ENSG00000113520.9	1	BRCA
ENSG00000198203.8.vs.ENSG00000261209.1	1	KIRC
ENSG00000274370.1.vs.ENSG00000176845.11	2	PRAD,HNSC
ENSG00000103540.15.vs.ENSG00000103544.13	1	BRCA
ENSG00000264222.1.vs.ENSG00000274214.1	1	HNSC
ENSG00000111642.13.vs.ENSG00000111641.9	1	COAD
ENSG00000141298.16.vs.ENSG00000167549.17	2	HNSC,BRCA
ENSG00000111196.8.vs.ENSG00000060140.7	1	KIRC
ENSG00000234373.1.vs.ENSG00000226562.3	4	LUAD,LUSC,PRAD,COAD
ENSG00000250878.3.vs.ENSG00000134899.16	1	HNSC
ENSG00000213533.10.vs.ENSG00000055955.14	3	LUSC,KIRC,BRCA
ENSG00000175691.8.vs.ENSG00000253392.2	2	LIHC,STAD
ENSG00000251546.1.vs.ENSG00000251039.2	2	STAD,KIRP
ENSG00000243730.2.vs.ENSG00000136327.6	1	LUAD
ENSG00000272140.2.vs.ENSG00000172650.11	3	LIHC,HNSC,BRCA
ENSG00000160766.13.vs.ENSG00000216109.1	1	LUAD
ENSG00000261732.1.vs.ENSG00000278987.1	1	BRCA
ENSG00000204941.12.vs.ENSG00000243137.6	1	THCA
ENSG00000143622.9.vs.ENSG00000207475.1	1	LUSC
ENSG00000232884.6.vs.ENSG00000226751.2	1	BLCA
ENSG00000163017.12.vs.ENSG00000114956.18	2	STAD,BRCA
ENSG00000198888.2.vs.ENSG00000198886.2	3	LIHC,PRAD,KIRC
ENSG00000169410.8.vs.ENSG00000276744.1	1	BRCA
ENSG00000149782.10.vs.ENSG00000173486.11	2	LUSC,BLCA
ENSG00000134070.4.vs.ENSG00000157014.9	2	BLCA,COAD
ENSG00000113812.12.vs.ENSG00000113811.9	1	STAD
ENSG00000207242.1.vs.ENSG00000244753.2	1	COAD
ENSG00000067334.12.vs.ENSG00000023909.8	3	LUSC,HNSC,UCEC
ENSG00000186827.9.vs.ENSG00000186891.12	1	LUAD
ENSG00000123349.12.vs.ENSG00000135476.10	1	LUAD
ENSG00000198840.2.vs.ENSG00000198888.2	2	LIHC,PRAD
ENSG00000111348.7.vs.ENSG00000139055.5	3	LIHC,COAD,THCA
ENSG00000024422.10.vs.ENSG00000105373.17	2	PRAD,HNSC
ENSG00000162650.14.vs.ENSG00000143028.8	1	STAD
ENSG00000224729.5.vs.ENSG00000077454.14	1	LUSC
ENSG00000210049.1.vs.ENSG00000212907.2	1	LIHC
ENSG00000204186.6.vs.ENSG00000279220.1	1	STAD
ENSG00000133789.13.vs.ENSG00000246273.5	2	LIHC,KIRC
ENSG00000165684.3.vs.ENSG00000187796.12	1	KIRC
ENSG00000272070.1.vs.ENSG00000081853.14	1	LUAD
ENSG00000004975.10.vs.ENSG00000132535.17	2	STAD,PRAD
ENSG00000228168.1.vs.ENSG00000179934.6	4	LUAD,LUSC,HNSC,BRCA
ENSG00000142609.16.vs.ENSG00000233542.1	1	HNSC
ENSG00000169592.13.vs.ENSG00000149930.16	2	LIHC,UCEC
ENSG00000278035.1.vs.ENSG00000088367.19	3	STAD,LUAD,THCA
ENSG00000254326.1.vs.ENSG00000211952.3	2	STAD,LUAD
ENSG00000164647.7.vs.ENSG00000157214.12	6	STAD,LUAD,PRAD,BLCA,BRCA,THCA
ENSG00000104852.13.vs.ENSG00000104863.10	3	LIHC,LUAD,BRCA
ENSG00000203783.4.vs.ENSG00000230779.1	1	COAD
ENSG00000103510.18.vs.ENSG00000103507.12	2	BRCA,UCEC
ENSG00000252587.1.vs.ENSG00000276599.1	1	UCEC
ENSG00000254709.5.vs.ENSG00000211678.2	1	STAD
ENSG00000277452.1.vs.ENSG00000143384.11	2	LUAD,LUSC
ENSG00000226054.2.vs.ENSG00000159231.5	2	COAD,KIRP
ENSG00000038532.13.vs.ENSG00000280153.1	2	LUAD,LUSC
ENSG00000239148.1.vs.ENSG00000224251.5	2	LUSC,BLCA
ENSG00000106948.15.vs.ENSG00000095397.12	1	UCEC
ENSG00000185551.11.vs.ENSG00000275322.1	4	LUAD,KIRP,BRCA,UCEC
ENSG00000105711.9.vs.ENSG00000089351.13	3	LUAD,PRAD,KIRC
ENSG00000239732.3.vs.ENSG00000280003.1	1	STAD
ENSG00000213281.4.vs.ENSG00000116748.18	1	LIHC
ENSG00000225950.6.vs.ENSG00000104848.1	1	BRCA
ENSG00000130489.11.vs.ENSG00000177989.12	1	THCA
ENSG00000175634.13.vs.ENSG00000172508.9	2	BLCA,HNSC
ENSG00000252182.1.vs.ENSG00000252936.1	1	UCEC
ENSG00000102962.4.vs.ENSG00000006210.6	1	LIHC
ENSG00000265714.1.vs.ENSG00000211905.1	3	STAD,LUAD,BLCA
ENSG00000261548.1.vs.ENSG00000181126.12	1	KIRP
ENSG00000111860.12.vs.ENSG00000216809.1	1	STAD
ENSG00000163736.3.vs.ENSG00000163737.3	1	COAD
ENSG00000188643.9.vs.ENSG00000189334.7	1	PRAD
ENSG00000163735.6.vs.ENSG00000163736.3	2	BRCA,THCA
ENSG00000262686.1.vs.ENSG00000217930.6	1	UCEC
ENSG00000211454.12.vs.ENSG00000162482.4	3	LUAD,LUSC,THCA
ENSG00000274227.1.vs.ENSG00000111300.8	2	LIHC,BLCA
ENSG00000172006.10.vs.ENSG00000172009.13	3	LUSC,COAD,THCA
ENSG00000113905.4.vs.ENSG00000090512.10	1	KIRC
ENSG00000167680.14.vs.ENSG00000267385.1	1	LUAD
ENSG00000111445.12.vs.ENSG00000276292.1	1	KIRC
ENSG00000224635.1.vs.ENSG00000235408.4	2	LIHC,BLCA
ENSG00000188910.7.vs.ENSG00000187513.8	1	LIHC
ENSG00000131771.12.vs.ENSG00000214546.3	3	STAD,HNSC,BRCA
ENSG00000129450.7.vs.ENSG00000168995.12	5	LIHC,BLCA,COAD,KIRC,BRCA
ENSG00000240618.1.vs.ENSG00000235373.1	1	PRAD
ENSG00000197077.11.vs.ENSG00000100053.8	4	LUAD,COAD,BRCA,UCEC
ENSG00000278991.1.vs.ENSG00000269951.1	1	KIRC
ENSG00000211685.3.vs.ENSG00000254030.1	1	STAD
ENSG00000279936.1.vs.ENSG00000196437.9	1	BRCA
ENSG00000259899.1.vs.ENSG00000259876.1	1	KIRC
ENSG00000130943.6.vs.ENSG00000205643.9	2	LUAD,LUSC
ENSG00000108947.4.vs.ENSG00000183914.13	2	KIRP,BRCA
ENSG00000136240.8.vs.ENSG00000231359.3	1	KIRC
ENSG00000166822.11.vs.ENSG00000183196.7	1	PRAD
ENSG00000196420.6.vs.ENSG00000188015.8	1	STAD
ENSG00000214578.5.vs.ENSG00000273650.1	6	STAD,PRAD,BLCA,KIRC,KIRP,THCA
ENSG00000249906.1.vs.ENSG00000279036.1	2	LUSC,PRAD
ENSG00000105647.13.vs.ENSG00000099308.9	2	LIHC,LUSC
ENSG00000172969.6.vs.ENSG00000236138.4	2	STAD,HNSC
ENSG00000198885.8.vs.ENSG00000121152.8	3	LIHC,STAD,COAD
ENSG00000211678.2.vs.ENSG00000211677.2	1	STAD
ENSG00000147650.10.vs.ENSG00000279138.1	1	KIRP
ENSG00000119922.8.vs.ENSG00000232110.6	1	BRCA
ENSG00000101161.7.vs.ENSG00000196421.6	1	KIRC
ENSG00000267281.2.vs.ENSG00000135390.16	1	UCEC
ENSG00000280323.1.vs.ENSG00000072195.13	1	PRAD
ENSG00000264781.1.vs.ENSG00000237547.1	2	STAD,LUAD
ENSG00000185624.13.vs.ENSG00000182676.4	1	STAD
ENSG00000136695.13.vs.ENSG00000136697.11	2	BLCA,HNSC
ENSG00000175879.8.vs.ENSG00000128709.11	1	LUAD
ENSG00000148948.6.vs.ENSG00000279675.1	3	LIHC,KIRC,BRCA
ENSG00000244734.2.vs.ENSG00000223609.6	1	LIHC
ENSG00000153147.5.vs.ENSG00000236296.6	1	LUAD
ENSG00000136631.11.vs.ENSG00000023902.12	2	LUAD,BRCA
ENSG00000073670.12.vs.ENSG00000161692.16	3	STAD,COAD,KIRP
ENSG00000255987.1.vs.ENSG00000267074.1	2	HNSC,BRCA
ENSG00000167657.10.vs.ENSG00000167658.14	2	LUSC,PRAD
ENSG00000279192.1.vs.ENSG00000273173.4	1	PRAD
ENSG00000163013.10.vs.ENSG00000135625.7	3	LIHC,PRAD,BRCA
ENSG00000159374.16.vs.ENSG00000115318.10	2	LIHC,HNSC
ENSG00000266392.1.vs.ENSG00000279692.1	1	PRAD
ENSG00000110245.10.vs.ENSG00000235910.1	1	LIHC
ENSG00000142556.17.vs.ENSG00000256087.5	3	STAD,BLCA,BRCA
ENSG00000133393.11.vs.ENSG00000133392.15	1	STAD
ENSG00000267648.1.vs.ENSG00000267547.1	2	LUSC,BRCA
ENSG00000137713.14.vs.ENSG00000254990.4	4	LIHC,STAD,KIRP,BRCA
ENSG00000213928.7.vs.ENSG00000100918.11	2	LIHC,PRAD
ENSG00000239713.6.vs.ENSG00000100298.14	7	LIHC,LUSC,PRAD,BLCA,KIRC,BRCA,THCA
ENSG00000158050.4.vs.ENSG00000188886.3	3	STAD,LUAD,KIRC
ENSG00000277481.1.vs.ENSG00000263232.2	2	LIHC,STAD
ENSG00000183624.12.vs.ENSG00000181789.13	1	KIRC
ENSG00000121406.7.vs.ENSG00000152439.11	3	STAD,PRAD,BRCA
ENSG00000251155.2.vs.ENSG00000225892.3	1	STAD
ENSG00000205361.7.vs.ENSG00000205364.3	3	LIHC,LUAD,PRAD
ENSG00000269936.3.vs.ENSG00000249669.6	3	STAD,PRAD,COAD
ENSG00000152443.11.vs.ENSG00000264453.1	1	STAD
ENSG00000119431.8.vs.ENSG00000148218.14	2	KIRC,BRCA
ENSG00000180532.9.vs.ENSG00000269097.1	2	LUAD,KIRC
ENSG00000241015.2.vs.ENSG00000196417.11	1	STAD
ENSG00000260633.1.vs.ENSG00000214289.2	2	KIRC,THCA
ENSG00000152672.6.vs.ENSG00000116031.8	1	BLCA
ENSG00000134780.8.vs.ENSG00000124920.12	2	LUAD,BRCA
ENSG00000166337.8.vs.ENSG00000166341.7	1	STAD
ENSG00000210049.1.vs.ENSG00000198899.2	2	LIHC,KIRC
ENSG00000224083.1.vs.ENSG00000237711.1	1	STAD
ENSG00000273366.1.vs.ENSG00000233903.2	2	LUAD,BRCA
ENSG00000204717.4.vs.ENSG00000235571.1	2	PRAD,THCA
ENSG00000157399.13.vs.ENSG00000006756.14	1	STAD
ENSG00000065371.16.vs.ENSG00000175455.13	1	HNSC
ENSG00000133055.7.vs.ENSG00000133048.11	2	LIHC,LUAD
ENSG00000173083.13.vs.ENSG00000173085.12	1	COAD
ENSG00000228037.1.vs.ENSG00000157870.13	1	LUSC
ENSG00000272760.1.vs.ENSG00000214106.6	3	COAD,KIRC,THCA
ENSG00000204187.5.vs.ENSG00000226808.1	1	BLCA
ENSG00000242252.1.vs.ENSG00000160783.18	3	STAD,LUAD,LUSC
ENSG00000141574.6.vs.ENSG00000173762.6	3	LUSC,PRAD,HNSC
ENSG00000198182.11.vs.ENSG00000196381.9	1	BRCA
ENSG00000196639.6.vs.ENSG00000197548.11	1	LIHC
ENSG00000264222.1.vs.ENSG00000186481.14	1	HNSC
ENSG00000211648.2.vs.ENSG00000211647.1	1	LUAD
ENSG00000267651.1.vs.ENSG00000101489.17	3	STAD,LUSC,PRAD
ENSG00000142002.15.vs.ENSG00000074842.6	2	LUSC,KIRP
ENSG00000073008.13.vs.ENSG00000216588.7	1	STAD
ENSG00000083099.9.vs.ENSG00000112159.10	3	LIHC,BLCA,KIRP
ENSG00000152454.3.vs.ENSG00000196724.11	3	STAD,PRAD,BRCA
ENSG00000128422.14.vs.ENSG00000186832.7	1	COAD
ENSG00000276704.1.vs.ENSG00000276573.1	1	COAD
ENSG00000167770.10.vs.ENSG00000176340.3	2	LUSC,HNSC
ENSG00000215386.9.vs.ENSG00000228798.1	4	PRAD,BLCA,COAD,KIRP
ENSG00000169375.14.vs.ENSG00000169410.8	2	LIHC,BRCA
ENSG00000176155.17.vs.ENSG00000169710.6	1	PRAD
ENSG00000267224.1.vs.ENSG00000196263.6	1	BRCA
ENSG00000090097.19.vs.ENSG00000280422.1	1	HNSC
ENSG00000200087.1.vs.ENSG00000204138.11	1	BRCA
ENSG00000201852.1.vs.ENSG00000264012.1	1	STAD
ENSG00000231010.1.vs.ENSG00000235159.1	2	LUAD,BRCA
ENSG00000198840.2.vs.ENSG00000210049.1	2	LIHC,LUAD
ENSG00000235859.5.vs.ENSG00000180233.10	3	STAD,KIRC,UCEC
ENSG00000095370.18.vs.ENSG00000160404.16	1	BRCA
ENSG00000183423.10.vs.ENSG00000180245.4	4	LIHC,STAD,PRAD,BRCA
ENSG00000197713.13.vs.ENSG00000272807.1	1	BRCA
ENSG00000280239.1.vs.ENSG00000267769.1	4	LIHC,LUAD,LUSC,PRAD
ENSG00000178691.9.vs.ENSG00000185158.11	2	BLCA,BRCA
ENSG00000254395.1.vs.ENSG00000253131.1	1	STAD
ENSG00000071127.15.vs.ENSG00000261490.1	1	COAD
ENSG00000272779.1.vs.ENSG00000211643.2	1	KIRC
ENSG00000173726.9.vs.ENSG00000273416.1	1	BRCA
ENSG00000140307.9.vs.ENSG00000140299.10	1	BRCA
ENSG00000197561.5.vs.ENSG00000197766.6	2	LUSC,PRAD
ENSG00000113851.12.vs.ENSG00000281584.1	2	LUSC,COAD
ENSG00000267291.1.vs.ENSG00000196218.10	1	STAD
ENSG00000262152.5.vs.ENSG00000270168.1	3	STAD,PRAD,BRCA
ENSG00000236947.4.vs.ENSG00000116604.16	1	PRAD
ENSG00000188100.8.vs.ENSG00000271573.1	1	LUSC
ENSG00000272144.1.vs.ENSG00000172262.10	2	PRAD,BRCA
ENSG00000125449.5.vs.ENSG00000170190.14	4	LIHC,LUAD,PRAD,BRCA
ENSG00000066336.10.vs.ENSG00000134571.9	2	LUAD,COAD
ENSG00000236760.1.vs.ENSG00000234423.1	1	UCEC
ENSG00000129158.9.vs.ENSG00000129167.8	2	PRAD,BLCA
ENSG00000064652.9.vs.ENSG00000260686.1	1	PRAD
ENSG00000090975.11.vs.ENSG00000051825.13	2	LIHC,BLCA
ENSG00000149575.5.vs.ENSG00000177098.7	1	LUAD
ENSG00000198840.2.vs.ENSG00000198786.2	2	LIHC,PRAD
ENSG00000183831.6.vs.ENSG00000162753.11	2	STAD,BRCA
ENSG00000136856.16.vs.ENSG00000136895.17	3	LIHC,PRAD,BRCA
ENSG00000137207.10.vs.ENSG00000271754.1	2	LUSC,BRCA
ENSG00000239322.1.vs.ENSG00000226186.1	2	STAD,BRCA
ENSG00000213762.9.vs.ENSG00000121417.12	3	STAD,PRAD,BRCA
ENSG00000202441.2.vs.ENSG00000204227.4	2	STAD,LUSC
ENSG00000128713.12.vs.ENSG00000170178.6	2	LUSC,UCEC
ENSG00000158806.12.vs.ENSG00000158815.9	4	LIHC,BLCA,HNSC,THCA
ENSG00000110497.13.vs.ENSG00000180720.7	1	BLCA
ENSG00000268049.1.vs.ENSG00000279611.1	3	STAD,LUAD,LUSC
ENSG00000157315.4.vs.ENSG00000132604.9	2	PRAD,KIRP
ENSG00000243543.7.vs.ENSG00000101448.12	2	LUAD,BRCA
ENSG00000105372.5.vs.ENSG00000105369.8	1	BRCA
ENSG00000198598.5.vs.ENSG00000256955.2	2	LUAD,BRCA
ENSG00000215045.7.vs.ENSG00000231359.3	4	LUAD,BLCA,KIRC,BRCA
ENSG00000114021.10.vs.ENSG00000036054.11	1	KIRC
ENSG00000179388.8.vs.ENSG00000261026.1	2	LUAD,PRAD
ENSG00000180257.11.vs.ENSG00000213801.4	2	LUAD,BRCA
ENSG00000168070.10.vs.ENSG00000149735.5	2	LUAD,HNSC
ENSG00000237276.7.vs.ENSG00000142632.15	2	PRAD,BLCA
ENSG00000205360.6.vs.ENSG00000198417.6	1	LIHC
ENSG00000170469.9.vs.ENSG00000170464.8	2	LIHC,PRAD
ENSG00000237111.1.vs.ENSG00000242887.1	2	STAD,LUAD
ENSG00000262714.1.vs.ENSG00000280027.1	3	STAD,LUAD,KIRC
ENSG00000161202.16.vs.ENSG00000161203.12	2	HNSC,KIRC
ENSG00000184898.6.vs.ENSG00000123609.9	4	LIHC,STAD,PRAD,KIRP
ENSG00000105374.8.vs.ENSG00000105379.8	1	BRCA
ENSG00000103485.16.vs.ENSG00000197471.10	1	STAD
ENSG00000105321.11.vs.ENSG00000257704.3	3	LIHC,LUAD,BRCA
ENSG00000273478.1.vs.ENSG00000234678.1	2	BLCA,BRCA
ENSG00000162576.15.vs.ENSG00000107404.16	3	PRAD,BLCA,HNSC
ENSG00000277548.1.vs.ENSG00000274765.1	1	KIRC
ENSG00000133983.13.vs.ENSG00000213463.4	1	BRCA
ENSG00000200204.1.vs.ENSG00000008517.15	1	STAD
ENSG00000272482.1.vs.ENSG00000162496.7	1	LUSC
ENSG00000154328.14.vs.ENSG00000079459.11	2	HNSC,UCEC
ENSG00000263751.1.vs.ENSG00000211905.1	3	STAD,LUAD,BRCA
ENSG00000167103.10.vs.ENSG00000167106.10	2	LIHC,THCA
ENSG00000277555.1.vs.ENSG00000278244.1	1	BRCA
ENSG00000277493.1.vs.ENSG00000233836.6	2	COAD,BRCA
ENSG00000261959.1.vs.ENSG00000188662.6	1	BRCA
ENSG00000054179.10.vs.ENSG00000186193.8	5	LUSC,PRAD,BLCA,HNSC,KIRC
ENSG00000173120.13.vs.ENSG00000173020.9	3	STAD,HNSC,THCA
ENSG00000196776.13.vs.ENSG00000279277.1	2	PRAD,KIRC
ENSG00000161249.19.vs.ENSG00000189001.9	1	THCA
ENSG00000272871.1.vs.ENSG00000273399.2	1	BRCA
ENSG00000130517.12.vs.ENSG00000130513.6	2	LUSC,PRAD
ENSG00000171109.17.vs.ENSG00000121864.8	2	STAD,KIRC
ENSG00000269069.1.vs.ENSG00000128000.14	3	LIHC,LUSC,BRCA
ENSG00000188157.12.vs.ENSG00000217801.8	1	LUAD
ENSG00000277161.1.vs.ENSG00000278311.3	2	BLCA,BRCA
ENSG00000131759.16.vs.ENSG00000266208.1	2	STAD,BRCA
ENSG00000254006.4.vs.ENSG00000172817.3	1	LIHC
ENSG00000224888.4.vs.ENSG00000182376.2	1	BRCA
ENSG00000121210.14.vs.ENSG00000250771.2	1	HNSC
ENSG00000158516.10.vs.ENSG00000128510.9	2	STAD,BRCA
ENSG00000167460.13.vs.ENSG00000167461.10	2	STAD,LUSC
ENSG00000157856.9.vs.ENSG00000138018.16	1	PRAD
ENSG00000110330.7.vs.ENSG00000023445.12	2	LIHC,KIRP
ENSG00000276953.1.vs.ENSG00000274752.1	1	LUSC
ENSG00000272505.1.vs.ENSG00000253641.4	2	COAD,KIRC
ENSG00000226025.8.vs.ENSG00000268088.1	3	HNSC,KIRC,BRCA
ENSG00000259953.1.vs.ENSG00000106868.15	4	LUSC,COAD,KIRP,BRCA
ENSG00000163738.17.vs.ENSG00000182585.8	1	BRCA
ENSG00000211678.2.vs.ENSG00000211676.2	2	STAD,COAD
ENSG00000243364.6.vs.ENSG00000143590.12	1	HNSC
ENSG00000240053.8.vs.ENSG00000201207.1	1	LUSC
ENSG00000243147.6.vs.ENSG00000265321.1	1	BRCA
ENSG00000104055.13.vs.ENSG00000261679.2	1	STAD
ENSG00000260500.1.vs.ENSG00000104980.6	1	LUSC
ENSG00000167107.11.vs.ENSG00000136444.8	1	STAD
ENSG00000260267.1.vs.ENSG00000261474.1	1	BRCA
ENSG00000187187.12.vs.ENSG00000013275.6	4	LIHC,LUAD,LUSC,BRCA
ENSG00000112852.6.vs.ENSG00000113205.4	4	LUAD,BLCA,HNSC,THCA
ENSG00000273137.1.vs.ENSG00000272836.1	5	LIHC,STAD,LUAD,LUSC,PRAD
ENSG00000278820.1.vs.ENSG00000260261.1	2	LIHC,LUAD
ENSG00000126759.11.vs.ENSG00000126767.16	2	BLCA,HNSC
ENSG00000167264.16.vs.ENSG00000072736.17	1	PRAD
ENSG00000022556.14.vs.ENSG00000267265.4	1	BRCA
ENSG00000144488.13.vs.ENSG00000168427.8	1	BRCA
ENSG00000211678.2.vs.ENSG00000211679.2	1	STAD
ENSG00000251323.2.vs.ENSG00000137513.8	2	LUAD,BRCA
ENSG00000167384.9.vs.ENSG00000273777.3	1	BRCA
ENSG00000159792.8.vs.ENSG00000263126.1	1	HNSC
ENSG00000280054.1.vs.ENSG00000111405.7	2	LIHC,THCA
ENSG00000088826.16.vs.ENSG00000230176.2	2	STAD,KIRC
ENSG00000078747.11.vs.ENSG00000125971.15	1	KIRP
ENSG00000242110.6.vs.ENSG00000164175.13	5	LUSC,HNSC,KIRP,BRCA,THCA
ENSG00000267896.1.vs.ENSG00000204673.9	3	LIHC,LUAD,BRCA
ENSG00000272223.1.vs.ENSG00000044090.7	3	LIHC,LUSC,BLCA
ENSG00000126091.18.vs.ENSG00000117407.15	1	LUSC
ENSG00000236155.5.vs.ENSG00000130695.12	1	LIHC
ENSG00000281005.1.vs.ENSG00000279330.1	2	HNSC,BRCA
ENSG00000172932.13.vs.ENSG00000173020.9	4	STAD,HNSC,KIRP,THCA
ENSG00000076650.5.vs.ENSG00000166359.9	1	BRCA
ENSG00000258088.1.vs.ENSG00000258245.1	1	COAD
ENSG00000116478.10.vs.ENSG00000182866.15	2	LUSC,THCA
ENSG00000107614.20.vs.ENSG00000273153.1	1	LUAD
ENSG00000168758.9.vs.ENSG00000168754.12	2	LUSC,COAD
ENSG00000204524.6.vs.ENSG00000268713.1	2	BRCA,THCA
ENSG00000146221.9.vs.ENSG00000124608.4	2	PRAD,BRCA
ENSG00000233087.6.vs.ENSG00000224425.2	1	COAD
ENSG00000269981.1.vs.ENSG00000268903.1	2	STAD,LUAD
ENSG00000279331.1.vs.ENSG00000188343.11	1	BRCA
ENSG00000230508.1.vs.ENSG00000029993.13	1	BRCA
ENSG00000186205.11.vs.ENSG00000221571.3	5	LIHC,LUSC,PRAD,THCA,UCEC
ENSG00000211930.1.vs.ENSG00000211924.1	1	STAD
ENSG00000114349.8.vs.ENSG00000188338.13	1	STAD
ENSG00000227036.5.vs.ENSG00000133195.10	2	LUAD,PRAD
ENSG00000165140.8.vs.ENSG00000130957.4	2	BLCA,KIRC
ENSG00000172113.7.vs.ENSG00000228638.1	1	PRAD
ENSG00000211943.2.vs.ENSG00000253709.1	2	STAD,BLCA
ENSG00000144827.7.vs.ENSG00000144824.18	3	PRAD,HNSC,KIRC
ENSG00000141873.9.vs.ENSG00000261342.1	1	LUSC
ENSG00000173480.9.vs.ENSG00000196724.11	3	STAD,PRAD,BRCA
ENSG00000204277.1.vs.ENSG00000267676.1	1	STAD
ENSG00000160791.13.vs.ENSG00000121807.5	3	LIHC,LUSC,THCA
ENSG00000164967.8.vs.ENSG00000137100.14	2	COAD,BRCA
ENSG00000170653.17.vs.ENSG00000135390.16	1	UCEC
ENSG00000114127.9.vs.ENSG00000175054.13	1	KIRC
ENSG00000277396.1.vs.ENSG00000207923.1	1	LUSC
ENSG00000222345.1.vs.ENSG00000212452.1	3	STAD,LUSC,BLCA
ENSG00000132510.9.vs.ENSG00000182224.10	5	LIHC,STAD,LUSC,BRCA,UCEC
ENSG00000186130.4.vs.ENSG00000171448.8	2	HNSC,KIRC
ENSG00000102003.9.vs.ENSG00000102001.11	2	COAD,UCEC
ENSG00000125149.10.vs.ENSG00000067955.12	2	LIHC,COAD
ENSG00000179859.7.vs.ENSG00000170049.8	1	COAD
ENSG00000102119.9.vs.ENSG00000147403.15	3	STAD,BLCA,COAD
ENSG00000268564.1.vs.ENSG00000105137.11	1	LUSC
ENSG00000198734.9.vs.ENSG00000174175.15	1	LUAD
ENSG00000225471.4.vs.ENSG00000204131.7	2	KIRC,BRCA
ENSG00000266075.2.vs.ENSG00000235169.6	1	STAD
ENSG00000260367.2.vs.ENSG00000260853.1	2	COAD,BRCA
ENSG00000270672.1.vs.ENSG00000211751.6	1	PRAD
ENSG00000255310.2.vs.ENSG00000269918.1	2	STAD,PRAD
ENSG00000274825.1.vs.ENSG00000101447.12	1	PRAD
ENSG00000196182.9.vs.ENSG00000181817.5	1	KIRC
ENSG00000170498.8.vs.ENSG00000174567.7	2	LIHC,KIRP
ENSG00000167136.6.vs.ENSG00000107021.14	4	LIHC,PRAD,COAD,KIRC
ENSG00000126602.9.vs.ENSG00000005339.11	1	BRCA
ENSG00000116525.12.vs.ENSG00000278997.1	3	STAD,HNSC,BRCA
ENSG00000152952.10.vs.ENSG00000261051.1	5	LIHC,LUAD,HNSC,KIRC,BRCA
ENSG00000158869.9.vs.ENSG00000158882.11	2	LUAD,BLCA
ENSG00000164889.11.vs.ENSG00000133612.17	3	STAD,LUSC,BRCA
ENSG00000253240.1.vs.ENSG00000211957.2	1	STAD
ENSG00000244219.5.vs.ENSG00000197037.9	2	LUAD,PRAD
ENSG00000171631.13.vs.ENSG00000110237.3	1	LIHC
ENSG00000205744.8.vs.ENSG00000125648.13	2	PRAD,COAD
ENSG00000187682.1.vs.ENSG00000094631.17	1	KIRC
ENSG00000114646.8.vs.ENSG00000173473.9	1	BRCA
ENSG00000141068.12.vs.ENSG00000168961.15	1	BRCA
ENSG00000271654.1.vs.ENSG00000244593.1	2	LIHC,STAD
ENSG00000189376.10.vs.ENSG00000165156.13	3	LUAD,PRAD,THCA
ENSG00000103495.12.vs.ENSG00000280789.1	3	LIHC,COAD,KIRC
ENSG00000258810.1.vs.ENSG00000169413.2	1	LIHC
ENSG00000198899.2.vs.ENSG00000198888.2	3	LIHC,PRAD,KIRC
ENSG00000241322.7.vs.ENSG00000175106.15	1	UCEC
ENSG00000265612.1.vs.ENSG00000265714.1	2	STAD,LUAD
ENSG00000167118.9.vs.ENSG00000167114.11	4	STAD,LUSC,BLCA,HNSC
ENSG00000182162.8.vs.ENSG00000169093.13	1	BLCA
ENSG00000231967.1.vs.ENSG00000107020.8	1	STAD
ENSG00000139289.12.vs.ENSG00000187109.12	1	UCEC
ENSG00000272182.1.vs.ENSG00000168297.14	1	KIRP
ENSG00000280211.1.vs.ENSG00000102870.5	1	BRCA
ENSG00000204710.2.vs.ENSG00000014216.14	1	LUAD
ENSG00000116748.18.vs.ENSG00000175984.13	2	STAD,THCA
ENSG00000145861.7.vs.ENSG00000135083.13	1	LIHC
ENSG00000137709.8.vs.ENSG00000181264.7	3	COAD,KIRP,BRCA
ENSG00000262692.1.vs.ENSG00000262358.1	2	BLCA,COAD
ENSG00000145050.14.vs.ENSG00000259956.1	1	HNSC
ENSG00000125414.17.vs.ENSG00000109061.9	1	PRAD
ENSG00000003393.13.vs.ENSG00000082126.16	1	BLCA
ENSG00000065029.13.vs.ENSG00000023892.10	2	STAD,BRCA
ENSG00000257176.2.vs.ENSG00000275476.1	2	LIHC,LUAD
ENSG00000268047.1.vs.ENSG00000267896.1	4	LIHC,STAD,LUAD,KIRP
ENSG00000276188.1.vs.ENSG00000277423.1	1	STAD
ENSG00000239474.5.vs.ENSG00000163093.10	1	COAD
ENSG00000129911.7.vs.ENSG00000079313.10	2	LIHC,LUSC
ENSG00000156983.14.vs.ENSG00000144550.11	2	HNSC,KIRP
ENSG00000116761.10.vs.ENSG00000271992.1	3	LIHC,LUAD,LUSC
ENSG00000182809.9.vs.ENSG00000213145.8	3	KIRC,BRCA,UCEC
ENSG00000270388.1.vs.ENSG00000271207.1	2	LIHC,PRAD
ENSG00000116199.10.vs.ENSG00000186283.12	3	LUAD,LUSC,HNSC
ENSG00000203804.4.vs.ENSG00000237781.3	2	LUAD,LUSC
ENSG00000164675.9.vs.ENSG00000128609.13	1	LUAD
ENSG00000232388.4.vs.ENSG00000101310.13	2	PRAD,HNSC
ENSG00000259865.1.vs.ENSG00000215795.2	3	LIHC,LUAD,LUSC
ENSG00000260401.1.vs.ENSG00000175591.10	3	STAD,COAD,UCEC
ENSG00000270923.1.vs.ENSG00000127366.5	2	PRAD,KIRP
ENSG00000198938.2.vs.ENSG00000210049.1	2	LIHC,KIRC
ENSG00000111405.7.vs.ENSG00000079337.14	2	LIHC,COAD
ENSG00000197409.7.vs.ENSG00000277157.1	1	STAD
ENSG00000266239.2.vs.ENSG00000222112.1	2	LUAD,KIRC
ENSG00000176160.8.vs.ENSG00000108389.8	1	LUSC
ENSG00000157214.12.vs.ENSG00000105792.18	1	STAD
ENSG00000267711.1.vs.ENSG00000267648.1	2	LUSC,BRCA
ENSG00000235821.1.vs.ENSG00000214922.8	1	COAD
ENSG00000137337.13.vs.ENSG00000137404.13	3	PRAD,COAD,KIRP
ENSG00000181192.10.vs.ENSG00000065665.19	2	LIHC,BRCA
ENSG00000100519.10.vs.ENSG00000198252.10	1	BRCA
ENSG00000147036.10.vs.ENSG00000047597.5	1	THCA
ENSG00000137135.16.vs.ENSG00000137078.7	1	PRAD
ENSG00000154143.2.vs.ENSG00000255341.1	1	BLCA
ENSG00000156860.14.vs.ENSG00000156858.10	3	LUAD,COAD,BRCA
ENSG00000187244.9.vs.ENSG00000142273.9	3	PRAD,COAD,KIRC
ENSG00000205220.10.vs.ENSG00000124067.15	1	STAD
ENSG00000203485.11.vs.ENSG00000185100.9	1	BRCA
ENSG00000197302.9.vs.ENSG00000276867.1	1	THCA
ENSG00000185513.13.vs.ENSG00000101049.13	1	UCEC
ENSG00000270711.1.vs.ENSG00000251520.1	1	LUAD
ENSG00000135114.11.vs.ENSG00000157895.10	1	LUSC
ENSG00000161048.10.vs.ENSG00000236848.2	1	LUAD
ENSG00000259287.2.vs.ENSG00000259408.2	2	STAD,COAD
ENSG00000058453.15.vs.ENSG00000226526.1	1	BRCA
ENSG00000249592.4.vs.ENSG00000272588.1	1	LIHC
ENSG00000262877.4.vs.ENSG00000279692.1	4	STAD,PRAD,COAD,UCEC
ENSG00000260949.1.vs.ENSG00000187840.4	2	LUAD,KIRC
ENSG00000261884.2.vs.ENSG00000124067.15	1	BLCA
ENSG00000159346.11.vs.ENSG00000159348.11	1	HNSC
ENSG00000229659.1.vs.ENSG00000138279.14	1	LUAD
ENSG00000171960.9.vs.ENSG00000234917.2	2	PRAD,BRCA
ENSG00000237223.5.vs.ENSG00000261209.1	1	KIRC
ENSG00000251131.1.vs.ENSG00000272382.1	1	PRAD
ENSG00000182223.7.vs.ENSG00000145248.6	1	HNSC
ENSG00000234389.1.vs.ENSG00000236525.1	1	LUAD
ENSG00000230453.8.vs.ENSG00000226562.3	4	LUAD,LUSC,PRAD,COAD
ENSG00000211725.3.vs.ENSG00000211727.3	1	LUSC
ENSG00000276566.1.vs.ENSG00000278857.1	2	PRAD,BLCA
ENSG00000162104.8.vs.ENSG00000262888.1	2	COAD,KIRP
ENSG00000111490.11.vs.ENSG00000255693.1	1	PRAD
ENSG00000156875.12.vs.ENSG00000261254.2	1	LUSC
ENSG00000214135.7.vs.ENSG00000161267.10	1	COAD
ENSG00000110723.10.vs.ENSG00000178202.11	1	LUAD
ENSG00000110786.16.vs.ENSG00000179057.12	1	LUAD
ENSG00000207730.2.vs.ENSG00000198976.1	2	STAD,BLCA
ENSG00000243323.4.vs.ENSG00000133067.16	1	KIRC
ENSG00000264538.5.vs.ENSG00000266490.1	1	BRCA
ENSG00000186910.3.vs.ENSG00000170054.13	2	STAD,BRCA
ENSG00000209082.1.vs.ENSG00000198938.2	3	LIHC,PRAD,KIRC
ENSG00000139890.8.vs.ENSG00000197324.7	2	HNSC,BRCA
ENSG00000280486.1.vs.ENSG00000130005.10	1	LUSC
ENSG00000274752.1.vs.ENSG00000276597.1	1	KIRC
ENSG00000260804.3.vs.ENSG00000279348.1	1	THCA
ENSG00000242849.2.vs.ENSG00000023330.13	1	COAD
ENSG00000277806.1.vs.ENSG00000159905.13	3	LIHC,STAD,BRCA
ENSG00000002834.16.vs.ENSG00000263874.1	2	BLCA,BRCA
ENSG00000205531.11.vs.ENSG00000110619.15	2	BLCA,HNSC
ENSG00000231976.6.vs.ENSG00000234296.1	1	STAD
ENSG00000113212.6.vs.ENSG00000120322.3	1	HNSC
ENSG00000273599.1.vs.ENSG00000019995.6	1	LIHC
ENSG00000277311.1.vs.ENSG00000274520.1	2	STAD,LUAD
ENSG00000137098.12.vs.ENSG00000204930.8	1	KIRC
ENSG00000261582.1.vs.ENSG00000125998.7	2	STAD,PRAD
ENSG00000224529.1.vs.ENSG00000182187.3	1	UCEC
ENSG00000227671.4.vs.ENSG00000259865.1	3	LIHC,LUAD,LUSC
ENSG00000188112.7.vs.ENSG00000261068.2	1	UCEC
ENSG00000240370.5.vs.ENSG00000111669.13	1	UCEC
ENSG00000264781.1.vs.ENSG00000263413.2	2	STAD,LUAD
ENSG00000108639.6.vs.ENSG00000267679.1	1	HNSC
ENSG00000141556.19.vs.ENSG00000262410.1	2	STAD,KIRC
ENSG00000269190.4.vs.ENSG00000269486.2	2	LIHC,THCA
ENSG00000129991.11.vs.ENSG00000105048.15	4	LIHC,STAD,KIRC,BRCA
ENSG00000235314.1.vs.ENSG00000136279.17	1	LIHC
ENSG00000157992.11.vs.ENSG00000235267.1	1	KIRP
ENSG00000176953.9.vs.ENSG00000169682.16	3	COAD,BRCA,UCEC
ENSG00000144713.11.vs.ENSG00000272263.1	1	UCEC
ENSG00000160767.19.vs.ENSG00000177628.14	1	LUSC
ENSG00000217275.2.vs.ENSG00000216331.1	4	STAD,LUSC,HNSC,THCA
ENSG00000164924.16.vs.ENSG00000260368.1	2	COAD,HNSC
ENSG00000197448.12.vs.ENSG00000178826.9	4	STAD,LUAD,PRAD,KIRC
ENSG00000205362.9.vs.ENSG00000205364.3	2	LIHC,LUAD
ENSG00000269275.1.vs.ENSG00000095752.5	1	LUSC
ENSG00000259407.1.vs.ENSG00000183655.12	3	LIHC,COAD,KIRC
ENSG00000273403.1.vs.ENSG00000272970.1	3	LIHC,STAD,KIRC
ENSG00000185038.13.vs.ENSG00000242366.3	1	PRAD
ENSG00000242534.2.vs.ENSG00000224607.4	2	STAD,LUAD
ENSG00000010626.13.vs.ENSG00000111669.13	2	BRCA,UCEC
ENSG00000237111.1.vs.ENSG00000211904.2	1	LUAD
ENSG00000184916.7.vs.ENSG00000183828.13	2	LIHC,BRCA
ENSG00000265917.1.vs.ENSG00000199172.2	1	LIHC
ENSG00000249978.1.vs.ENSG00000211689.5	2	LUSC,COAD
ENSG00000259762.1.vs.ENSG00000183655.12	1	LIHC
ENSG00000142623.9.vs.ENSG00000142619.4	2	STAD,COAD
ENSG00000143368.9.vs.ENSG00000159164.8	2	STAD,LUAD
ENSG00000138604.8.vs.ENSG00000259504.2	2	BLCA,BRCA
ENSG00000260179.1.vs.ENSG00000184163.3	1	BRCA
ENSG00000266835.4.vs.ENSG00000177426.19	1	LUAD
ENSG00000240505.7.vs.ENSG00000230709.1	1	STAD
ENSG00000136197.11.vs.ENSG00000261019.1	2	STAD,UCEC
ENSG00000264655.1.vs.ENSG00000266208.1	1	STAD
ENSG00000272345.1.vs.ENSG00000112308.11	1	HNSC
ENSG00000272669.1.vs.ENSG00000244491.1	1	COAD
ENSG00000278035.1.vs.ENSG00000131043.10	1	STAD
ENSG00000162782.14.vs.ENSG00000227141.2	1	STAD
ENSG00000179598.5.vs.ENSG00000154803.11	5	LUSC,COAD,HNSC,KIRC,UCEC
ENSG00000198899.2.vs.ENSG00000212907.2	3	LIHC,PRAD,THCA
ENSG00000277728.1.vs.ENSG00000133193.11	2	PRAD,BRCA
ENSG00000135924.14.vs.ENSG00000243910.6	1	UCEC
ENSG00000167701.12.vs.ENSG00000167700.7	2	LUAD,KIRC
ENSG00000244151.1.vs.ENSG00000164897.11	2	LIHC,LUSC
ENSG00000244723.3.vs.ENSG00000272578.4	4	STAD,LUSC,KIRC,BRCA
ENSG00000105219.7.vs.ENSG00000174521.7	1	LIHC
ENSG00000177839.6.vs.ENSG00000120322.3	2	LUAD,HNSC
ENSG00000236431.1.vs.ENSG00000272913.1	2	HNSC,KIRC
ENSG00000202441.2.vs.ENSG00000204228.3	1	STAD
ENSG00000197291.7.vs.ENSG00000108799.11	2	KIRC,THCA
ENSG00000138778.10.vs.ENSG00000164039.13	1	UCEC
ENSG00000217648.1.vs.ENSG00000146416.15	2	LIHC,HNSC
ENSG00000272511.1.vs.ENSG00000151789.8	2	STAD,PRAD
ENSG00000184414.2.vs.ENSG00000106351.11	1	LUAD
ENSG00000100139.12.vs.ENSG00000280527.1	5	BLCA,COAD,HNSC,BRCA,UCEC
ENSG00000139973.14.vs.ENSG00000186369.8	4	STAD,LUAD,BLCA,KIRP
ENSG00000106004.4.vs.ENSG00000106006.6	3	LIHC,HNSC,BRCA
ENSG00000009724.15.vs.ENSG00000116649.8	3	LIHC,STAD,LUSC
ENSG00000185862.6.vs.ENSG00000126861.4	1	BRCA
ENSG00000125637.14.vs.ENSG00000189223.12	1	STAD
ENSG00000005189.18.vs.ENSG00000005187.10	1	LUAD
ENSG00000228626.1.vs.ENSG00000234283.1	1	STAD
ENSG00000236473.1.vs.ENSG00000171360.3	1	COAD
ENSG00000211797.2.vs.ENSG00000211796.1	4	LUSC,PRAD,KIRC,BRCA
ENSG00000113272.12.vs.ENSG00000155858.5	2	LIHC,LUAD
ENSG00000198824.5.vs.ENSG00000169062.13	2	LIHC,BRCA
ENSG00000064601.15.vs.ENSG00000168612.4	1	PRAD
ENSG00000205002.3.vs.ENSG00000164756.11	2	STAD,HNSC
ENSG00000231636.1.vs.ENSG00000272056.1	1	PRAD
ENSG00000178226.9.vs.ENSG00000052344.14	1	LIHC
ENSG00000250148.1.vs.ENSG00000164181.12	2	STAD,BLCA
ENSG00000281207.1.vs.ENSG00000171793.12	1	LIHC
ENSG00000068308.12.vs.ENSG00000102096.9	1	COAD
ENSG00000272555.1.vs.ENSG00000135929.7	2	PRAD,HNSC
ENSG00000240322.3.vs.ENSG00000239419.3	1	HNSC
ENSG00000161203.12.vs.ENSG00000161204.10	2	PRAD,KIRC
ENSG00000248103.1.vs.ENSG00000274525.1	2	STAD,HNSC
ENSG00000279010.1.vs.ENSG00000100139.12	6	LUAD,BLCA,COAD,HNSC,BRCA,UCEC
ENSG00000245148.2.vs.ENSG00000256007.1	1	BLCA
ENSG00000151014.5.vs.ENSG00000252503.1	1	KIRC
ENSG00000131459.11.vs.ENSG00000050748.16	2	STAD,LUAD
ENSG00000231331.1.vs.ENSG00000232594.1	2	STAD,LUSC
ENSG00000124942.12.vs.ENSG00000255446.1	1	LUAD
ENSG00000228903.5.vs.ENSG00000214783.8	1	COAD
ENSG00000157617.15.vs.ENSG00000227698.1	1	KIRP
ENSG00000159079.17.vs.ENSG00000242220.5	1	BRCA
ENSG00000237008.2.vs.ENSG00000143546.8	1	COAD
ENSG00000275910.1.vs.ENSG00000260872.1	1	BRCA
ENSG00000111331.11.vs.ENSG00000111335.11	5	STAD,LUSC,PRAD,HNSC,BRCA
ENSG00000107960.9.vs.ENSG00000260461.1	2	LIHC,LUAD
ENSG00000211727.3.vs.ENSG00000211728.2	3	LUSC,HNSC,BRCA
ENSG00000110200.7.vs.ENSG00000149357.8	1	HNSC
ENSG00000243234.1.vs.ENSG00000152454.3	1	BRCA
ENSG00000260633.1.vs.ENSG00000114019.13	4	LIHC,PRAD,KIRC,THCA
ENSG00000267745.1.vs.ENSG00000267547.1	3	LIHC,LUSC,BRCA
ENSG00000180834.6.vs.ENSG00000233885.6	2	LIHC,KIRP
ENSG00000154079.5.vs.ENSG00000082269.15	2	STAD,KIRC
ENSG00000105939.11.vs.ENSG00000146858.7	2	STAD,BRCA
ENSG00000268869.4.vs.ENSG00000236698.1	1	KIRC
ENSG00000112655.14.vs.ENSG00000137171.13	1	BRCA
ENSG00000165071.13.vs.ENSG00000129295.7	3	LIHC,STAD,COAD
ENSG00000204267.12.vs.ENSG00000241106.5	3	PRAD,HNSC,BRCA
ENSG00000083812.10.vs.ENSG00000249471.6	2	STAD,BRCA
ENSG00000136982.5.vs.ENSG00000064313.10	2	LUAD,KIRC
ENSG00000146576.11.vs.ENSG00000236609.3	1	PRAD
ENSG00000109705.7.vs.ENSG00000246095.2	1	LUSC
ENSG00000186230.6.vs.ENSG00000276449.1	1	THCA
ENSG00000198556.12.vs.ENSG00000196652.10	1	BRCA
ENSG00000166912.15.vs.ENSG00000134160.12	1	HNSC
ENSG00000174885.11.vs.ENSG00000255026.1	3	STAD,KIRC,BRCA
ENSG00000156521.12.vs.ENSG00000042286.13	4	STAD,KIRP,THCA,UCEC
ENSG00000254614.2.vs.ENSG00000255200.1	3	LIHC,HNSC,KIRP
ENSG00000225871.2.vs.ENSG00000231551.5	2	LUAD,KIRC
ENSG00000233799.1.vs.ENSG00000272588.1	1	UCEC
ENSG00000238015.2.vs.ENSG00000137965.9	1	BRCA
ENSG00000070476.13.vs.ENSG00000279328.1	1	LIHC
ENSG00000128228.4.vs.ENSG00000100023.16	1	LIHC
ENSG00000146001.5.vs.ENSG00000262096.2	2	HNSC,THCA
ENSG00000160271.13.vs.ENSG00000148288.10	2	LUAD,HNSC
ENSG00000170835.13.vs.ENSG00000148308.16	2	LIHC,HNSC
ENSG00000237970.1.vs.ENSG00000236313.1	1	BRCA
ENSG00000138834.11.vs.ENSG00000206053.11	1	BRCA
ENSG00000126953.5.vs.ENSG00000270813.2	3	PRAD,BLCA,HNSC
ENSG00000196154.10.vs.ENSG00000196420.6	1	STAD
ENSG00000243959.3.vs.ENSG00000146083.10	1	LUSC
ENSG00000265612.1.vs.ENSG00000237111.1	2	STAD,LUAD
ENSG00000211699.2.vs.ENSG00000211697.3	1	PRAD
ENSG00000280407.2.vs.ENSG00000275888.1	5	LIHC,STAD,LUAD,LUSC,KIRC
ENSG00000211459.2.vs.ENSG00000198886.2	3	LIHC,KIRC,THCA
ENSG00000018625.13.vs.ENSG00000132681.15	2	LIHC,HNSC
ENSG00000134058.9.vs.ENSG00000134056.10	1	BRCA
ENSG00000277987.1.vs.ENSG00000274312.1	1	BRCA
ENSG00000277423.1.vs.ENSG00000175970.8	1	BLCA
ENSG00000276712.1.vs.ENSG00000112039.3	1	STAD
ENSG00000269903.1.vs.ENSG00000123297.15	1	LIHC
ENSG00000177839.6.vs.ENSG00000197479.6	3	LUAD,HNSC,THCA
ENSG00000258987.1.vs.ENSG00000140067.6	1	BLCA
ENSG00000131748.14.vs.ENSG00000141744.3	3	BLCA,COAD,BRCA
ENSG00000273230.1.vs.ENSG00000164880.14	1	LUSC
ENSG00000232724.1.vs.ENSG00000170190.14	2	LUAD,BRCA
ENSG00000100385.12.vs.ENSG00000133466.12	1	PRAD
ENSG00000214706.9.vs.ENSG00000243477.4	2	LUSC,HNSC
ENSG00000157873.16.vs.ENSG00000225931.3	1	KIRP
ENSG00000090932.9.vs.ENSG00000105197.9	1	THCA
ENSG00000277734.3.vs.ENSG00000211816.2	1	LUSC
ENSG00000236567.2.vs.ENSG00000237711.1	1	STAD
ENSG00000137817.15.vs.ENSG00000067225.16	2	KIRP,BRCA
ENSG00000173914.10.vs.ENSG00000173898.10	1	THCA
ENSG00000057593.12.vs.ENSG00000126218.10	3	LIHC,KIRP,THCA
ENSG00000214999.3.vs.ENSG00000275011.1	3	STAD,LUSC,COAD
ENSG00000270248.1.vs.ENSG00000204611.5	1	BRCA
ENSG00000179832.16.vs.ENSG00000260428.2	3	LIHC,LUSC,COAD
ENSG00000127585.10.vs.ENSG00000127580.14	1	BRCA
ENSG00000153283.11.vs.ENSG00000240891.5	1	BLCA
ENSG00000116396.12.vs.ENSG00000197106.6	2	BLCA,KIRC
ENSG00000113211.5.vs.ENSG00000255622.3	3	STAD,HNSC,THCA
ENSG00000242516.1.vs.ENSG00000236138.4	1	STAD
ENSG00000257591.4.vs.ENSG00000132010.14	2	STAD,THCA
ENSG00000132612.15.vs.ENSG00000168807.15	4	LIHC,STAD,PRAD,KIRP
ENSG00000189423.10.vs.ENSG00000230528.6	1	STAD
ENSG00000158859.9.vs.ENSG00000158850.13	3	LUAD,LUSC,KIRC
ENSG00000270067.1.vs.ENSG00000272389.1	1	BRCA
ENSG00000119640.7.vs.ENSG00000119684.14	1	BRCA
ENSG00000253341.1.vs.ENSG00000254080.1	1	STAD
ENSG00000243832.1.vs.ENSG00000163785.11	1	KIRC
ENSG00000230189.5.vs.ENSG00000179406.6	4	LUSC,PRAD,KIRP,UCEC
ENSG00000054967.11.vs.ENSG00000110237.3	1	KIRP
ENSG00000197291.7.vs.ENSG00000273650.1	6	STAD,PRAD,BLCA,KIRC,KIRP,THCA
ENSG00000239713.6.vs.ENSG00000243811.6	6	LIHC,LUSC,PRAD,BLCA,HNSC,THCA
ENSG00000081051.6.vs.ENSG00000163631.15	3	LUAD,PRAD,COAD
ENSG00000211698.2.vs.ENSG00000211699.2	1	PRAD
ENSG00000181894.13.vs.ENSG00000121413.11	2	STAD,BRCA
ENSG00000181885.17.vs.ENSG00000175826.10	2	COAD,UCEC
ENSG00000168758.9.vs.ENSG00000163126.13	2	LIHC,HNSC
ENSG00000048544.5.vs.ENSG00000124496.11	1	LIHC
ENSG00000211653.2.vs.ENSG00000253818.1	2	LUAD,PRAD
ENSG00000159792.8.vs.ENSG00000038358.13	2	HNSC,UCEC
ENSG00000132004.11.vs.ENSG00000105576.14	3	LUSC,THCA,UCEC
ENSG00000183281.13.vs.ENSG00000231259.4	1	KIRP
ENSG00000175749.11.vs.ENSG00000145730.19	2	COAD,HNSC
ENSG00000234091.1.vs.ENSG00000199407.1	1	STAD
ENSG00000211459.2.vs.ENSG00000198888.2	2	LIHC,KIRC
ENSG00000245970.2.vs.ENSG00000132561.12	2	LUAD,COAD
ENSG00000263751.1.vs.ENSG00000264781.1	2	STAD,LUAD
ENSG00000160345.11.vs.ENSG00000226706.1	1	HNSC
ENSG00000262766.1.vs.ENSG00000278133.1	3	LIHC,COAD,BRCA
ENSG00000123144.9.vs.ENSG00000105576.14	3	LIHC,STAD,LUSC
ENSG00000182379.9.vs.ENSG00000123384.12	1	HNSC
ENSG00000269153.1.vs.ENSG00000183248.10	1	LUSC
ENSG00000169876.12.vs.ENSG00000205277.8	2	STAD,BLCA
ENSG00000135821.15.vs.ENSG00000203730.2	1	BRCA
ENSG00000118473.20.vs.ENSG00000152760.8	2	STAD,PRAD
ENSG00000211658.2.vs.ENSG00000253451.1	3	STAD,BLCA,BRCA
ENSG00000176928.5.vs.ENSG00000249856.1	2	STAD,UCEC
ENSG00000182218.8.vs.ENSG00000036530.7	2	LUAD,PRAD
ENSG00000162757.4.vs.ENSG00000117595.9	2	PRAD,BRCA
ENSG00000178789.7.vs.ENSG00000167850.3	3	LUAD,PRAD,BLCA
ENSG00000113966.8.vs.ENSG00000261292.2	1	PRAD
ENSG00000270307.1.vs.ENSG00000271207.1	1	LIHC
ENSG00000205871.5.vs.ENSG00000159459.10	1	LIHC
ENSG00000134884.12.vs.ENSG00000125266.6	1	PRAD
ENSG00000279286.2.vs.ENSG00000133962.6	2	KIRP,BRCA
ENSG00000248015.5.vs.ENSG00000280486.1	2	LUAD,LUSC
ENSG00000198899.2.vs.ENSG00000198886.2	4	LIHC,PRAD,KIRC,THCA
ENSG00000261342.1.vs.ENSG00000176490.4	1	LUSC
ENSG00000210741.1.vs.ENSG00000170689.9	3	LUSC,BLCA,HNSC
ENSG00000137752.21.vs.ENSG00000137757.9	3	STAD,BLCA,KIRP
ENSG00000267648.1.vs.ENSG00000267102.1	2	LUSC,BRCA
ENSG00000197283.11.vs.ENSG00000112511.16	2	LUSC,UCEC
ENSG00000270038.1.vs.ENSG00000258927.1	2	STAD,LUSC
ENSG00000277621.1.vs.ENSG00000006744.17	1	STAD
ENSG00000136828.17.vs.ENSG00000136895.17	1	LIHC
ENSG00000267355.2.vs.ENSG00000055483.18	2	KIRC,BRCA
ENSG00000267874.1.vs.ENSG00000089351.13	1	LUAD
ENSG00000186897.4.vs.ENSG00000258334.1	4	STAD,HNSC,KIRC,KIRP
ENSG00000185168.5.vs.ENSG00000185332.5	1	KIRC
ENSG00000160870.11.vs.ENSG00000106258.12	3	STAD,LUSC,PRAD
ENSG00000172123.11.vs.ENSG00000267648.1	2	LUSC,BRCA
ENSG00000081818.3.vs.ENSG00000113209.8	2	HNSC,THCA
ENSG00000270903.1.vs.ENSG00000186714.11	1	LIHC
ENSG00000163352.5.vs.ENSG00000160685.12	1	PRAD
ENSG00000090674.14.vs.ENSG00000198816.5	1	LUSC
ENSG00000277011.1.vs.ENSG00000256943.1	2	THCA,UCEC
ENSG00000233952.1.vs.ENSG00000221971.3	1	KIRC
ENSG00000269051.4.vs.ENSG00000269001.1	2	PRAD,HNSC
ENSG00000199053.2.vs.ENSG00000132535.17	2	STAD,LUAD
ENSG00000232224.4.vs.ENSG00000236983.1	2	STAD,BRCA
ENSG00000229127.1.vs.ENSG00000197713.13	1	BRCA
ENSG00000167258.12.vs.ENSG00000273576.1	3	PRAD,BLCA,BRCA
ENSG00000184634.14.vs.ENSG00000196338.11	1	BRCA
ENSG00000173826.13.vs.ENSG00000264813.4	2	STAD,PRAD
ENSG00000273588.1.vs.ENSG00000224559.2	1	STAD
ENSG00000115268.8.vs.ENSG00000071626.15	1	LIHC
ENSG00000169991.9.vs.ENSG00000159423.15	2	LUAD,COAD
ENSG00000143224.16.vs.ENSG00000143222.10	1	LUSC
ENSG00000273183.1.vs.ENSG00000214106.6	1	KIRC
ENSG00000255986.5.vs.ENSG00000205362.9	2	LIHC,LUAD
ENSG00000274341.1.vs.ENSG00000266385.1	2	KIRP,BRCA
ENSG00000211706.2.vs.ENSG00000211734.3	4	LUSC,PRAD,BLCA,BRCA
ENSG00000237070.1.vs.ENSG00000229108.1	1	BLCA
ENSG00000165816.11.vs.ENSG00000095627.8	3	LUSC,BLCA,UCEC
ENSG00000237973.1.vs.ENSG00000248527.1	3	LIHC,PRAD,KIRC
ENSG00000181588.16.vs.ENSG00000071655.16	3	LIHC,LUSC,PRAD
ENSG00000228300.12.vs.ENSG00000160953.13	1	LUSC
ENSG00000087502.16.vs.ENSG00000273680.1	1	COAD
ENSG00000138346.13.vs.ENSG00000204130.11	2	BRCA,UCEC
ENSG00000186205.11.vs.ENSG00000117791.14	1	LIHC
ENSG00000250878.3.vs.ENSG00000278445.1	1	HNSC
ENSG00000278784.1.vs.ENSG00000100926.13	1	BRCA
ENSG00000261762.1.vs.ENSG00000080644.14	3	LIHC,STAD,LUSC
ENSG00000224999.1.vs.ENSG00000233085.4	1	BLCA
ENSG00000206754.1.vs.ENSG00000221500.1	3	LIHC,STAD,LUSC
ENSG00000171848.12.vs.ENSG00000163009.7	3	LUSC,KIRC,UCEC
ENSG00000180914.9.vs.ENSG00000070950.8	1	LIHC
ENSG00000278500.1.vs.ENSG00000226363.3	3	LUAD,PRAD,BRCA
ENSG00000280106.1.vs.ENSG00000180884.9	2	BRCA,THCA
ENSG00000200795.1.vs.ENSG00000202538.1	2	PRAD,COAD
ENSG00000276259.1.vs.ENSG00000103034.13	1	KIRP
ENSG00000100445.15.vs.ENSG00000139899.9	1	BRCA
ENSG00000160688.17.vs.ENSG00000160685.12	5	LIHC,LUAD,LUSC,KIRC,BRCA
ENSG00000248564.1.vs.ENSG00000251535.1	1	STAD
ENSG00000230149.2.vs.ENSG00000272669.1	2	LUAD,BLCA
ENSG00000213551.4.vs.ENSG00000156042.16	1	BRCA
ENSG00000276772.1.vs.ENSG00000128849.10	2	STAD,COAD
ENSG00000175518.6.vs.ENSG00000224295.2	4	PRAD,KIRP,BRCA,THCA
ENSG00000254806.4.vs.ENSG00000124155.15	1	KIRP
ENSG00000197713.13.vs.ENSG00000144406.17	1	BRCA
ENSG00000180190.10.vs.ENSG00000279852.1	3	STAD,BRCA,THCA
ENSG00000168234.11.vs.ENSG00000154040.19	4	STAD,COAD,KIRC,UCEC
ENSG00000103495.12.vs.ENSG00000281348.1	1	BRCA
ENSG00000153002.10.vs.ENSG00000163751.3	1	UCEC
ENSG00000083807.8.vs.ENSG00000119574.11	1	BRCA
ENSG00000263751.1.vs.ENSG00000237547.1	2	STAD,LUAD
ENSG00000008517.15.vs.ENSG00000008516.15	1	LIHC
ENSG00000235447.2.vs.ENSG00000280870.1	1	LIHC
ENSG00000198182.11.vs.ENSG00000267152.1	1	BRCA
ENSG00000259321.1.vs.ENSG00000259371.2	1	BRCA
ENSG00000179409.9.vs.ENSG00000167699.12	4	STAD,LUAD,COAD,BRCA
ENSG00000204149.8.vs.ENSG00000204152.9	2	LIHC,KIRC
ENSG00000280168.1.vs.ENSG00000277621.1	1	STAD
ENSG00000143061.16.vs.ENSG00000116815.14	2	LIHC,COAD
ENSG00000135605.11.vs.ENSG00000074966.9	1	KIRP
ENSG00000217275.2.vs.ENSG00000276966.1	2	LUSC,HNSC
ENSG00000224635.1.vs.ENSG00000196756.10	3	LIHC,PRAD,BLCA
ENSG00000258659.5.vs.ENSG00000121236.18	1	LIHC
ENSG00000137145.19.vs.ENSG00000273226.1	2	STAD,HNSC
ENSG00000253325.1.vs.ENSG00000211956.2	1	STAD
ENSG00000157873.16.vs.ENSG00000272449.1	2	KIRP,BRCA
ENSG00000224083.1.vs.ENSG00000236254.1	1	STAD
ENSG00000136811.15.vs.ENSG00000228510.2	1	HNSC
ENSG00000177076.5.vs.ENSG00000260912.1	2	STAD,LUAD
ENSG00000197191.4.vs.ENSG00000198569.8	2	BLCA,KIRC
ENSG00000259856.1.vs.ENSG00000171241.7	1	COAD
ENSG00000146112.10.vs.ENSG00000204560.8	3	HNSC,BRCA,UCEC
ENSG00000160654.8.vs.ENSG00000110344.8	3	LIHC,PRAD,HNSC
ENSG00000275183.1.vs.ENSG00000167617.2	2	HNSC,BRCA
ENSG00000142252.9.vs.ENSG00000104859.13	4	LIHC,STAD,LUAD,BRCA
ENSG00000182224.10.vs.ENSG00000167874.6	2	STAD,BRCA
ENSG00000171540.7.vs.ENSG00000164253.11	2	HNSC,BRCA
ENSG00000267199.1.vs.ENSG00000141391.12	4	LUSC,KIRC,BRCA,THCA
ENSG00000234537.1.vs.ENSG00000225511.5	1	KIRC
ENSG00000267874.1.vs.ENSG00000105707.12	2	STAD,LUAD
ENSG00000261671.1.vs.ENSG00000279631.1	4	LUSC,KIRC,KIRP,THCA
ENSG00000279699.1.vs.ENSG00000248751.5	1	STAD
ENSG00000262583.1.vs.ENSG00000183196.7	1	PRAD
ENSG00000182327.7.vs.ENSG00000142484.6	2	LIHC,COAD
ENSG00000119231.9.vs.ENSG00000225578.1	2	LIHC,LUAD
ENSG00000172613.6.vs.ENSG00000175463.10	2	BLCA,HNSC
ENSG00000204228.3.vs.ENSG00000204227.4	1	STAD
ENSG00000196378.10.vs.ENSG00000161016.14	3	LIHC,LUAD,COAD
ENSG00000106066.12.vs.ENSG00000235669.1	1	STAD
ENSG00000092054.12.vs.ENSG00000197616.10	4	STAD,BLCA,HNSC,UCEC
ENSG00000117122.12.vs.ENSG00000159363.16	1	HNSC
ENSG00000174885.11.vs.ENSG00000142102.14	2	KIRC,BRCA
ENSG00000277977.1.vs.ENSG00000221923.7	2	HNSC,BRCA
ENSG00000267369.1.vs.ENSG00000267046.1	1	LUSC
ENSG00000263751.1.vs.ENSG00000242887.1	2	STAD,LUAD
ENSG00000198939.6.vs.ENSG00000178338.9	3	LUAD,BRCA,UCEC
ENSG00000169548.3.vs.ENSG00000275004.2	2	STAD,LUSC
ENSG00000215769.7.vs.ENSG00000270714.1	1	COAD
ENSG00000214435.6.vs.ENSG00000166275.14	2	LIHC,BRCA
ENSG00000214026.9.vs.ENSG00000232987.1	1	BLCA
ENSG00000167701.12.vs.ENSG00000265393.1	1	KIRC
ENSG00000108468.13.vs.ENSG00000278765.1	1	BLCA
ENSG00000265666.1.vs.ENSG00000278918.1	3	STAD,COAD,BRCA
ENSG00000228914.1.vs.ENSG00000234156.1	1	LUSC
ENSG00000243970.1.vs.ENSG00000090621.12	1	LIHC
ENSG00000260948.1.vs.ENSG00000085465.12	2	LUSC,THCA
ENSG00000250948.1.vs.ENSG00000248714.5	1	BRCA
ENSG00000280424.1.vs.ENSG00000273145.1	3	LUAD,HNSC,BRCA
ENSG00000231113.2.vs.ENSG00000137161.15	2	BRCA,UCEC
ENSG00000105701.14.vs.ENSG00000105656.11	1	LUSC
ENSG00000129646.12.vs.ENSG00000161542.15	2	STAD,BLCA
ENSG00000092208.15.vs.ENSG00000258591.2	1	BRCA
ENSG00000212643.2.vs.ENSG00000249947.2	1	BRCA
ENSG00000278175.2.vs.ENSG00000204837.3	1	STAD
ENSG00000278341.1.vs.ENSG00000103335.18	3	HNSC,KIRP,BRCA
ENSG00000026950.15.vs.ENSG00000124549.13	3	PRAD,COAD,BRCA
ENSG00000196878.11.vs.ENSG00000227591.4	1	BRCA
ENSG00000182004.11.vs.ENSG00000058673.14	1	LUAD
ENSG00000211747.3.vs.ENSG00000251578.1	1	BRCA
ENSG00000167800.9.vs.ENSG00000132744.6	3	PRAD,KIRC,BRCA
ENSG00000079616.11.vs.ENSG00000174992.7	1	BRCA
ENSG00000280527.1.vs.ENSG00000278948.1	8	LUSC,PRAD,BLCA,COAD,HNSC,KIRC,BRCA,UCEC
ENSG00000207607.2.vs.ENSG00000198976.1	3	STAD,BLCA,BRCA
ENSG00000007312.11.vs.ENSG00000007314.10	1	STAD
ENSG00000267317.2.vs.ENSG00000119559.14	3	STAD,LUSC,COAD
ENSG00000271787.1.vs.ENSG00000205795.4	3	LUAD,KIRC,UCEC
ENSG00000154262.11.vs.ENSG00000154263.16	2	PRAD,KIRC
ENSG00000251661.3.vs.ENSG00000185885.14	1	BLCA
ENSG00000267968.1.vs.ENSG00000142515.13	2	PRAD,UCEC
ENSG00000204429.4.vs.ENSG00000279154.1	1	STAD
ENSG00000184635.12.vs.ENSG00000256771.2	2	COAD,BRCA
ENSG00000108506.10.vs.ENSG00000136492.7	2	PRAD,COAD
ENSG00000186842.4.vs.ENSG00000265590.8	1	BRCA
ENSG00000265612.1.vs.ENSG00000242887.1	2	STAD,LUAD
ENSG00000263751.1.vs.ENSG00000265714.1	2	STAD,LUAD
ENSG00000265478.2.vs.ENSG00000171928.12	1	HNSC
ENSG00000174123.9.vs.ENSG00000174125.6	3	LIHC,HNSC,BRCA
ENSG00000261116.1.vs.ENSG00000168143.8	4	STAD,LUAD,PRAD,UCEC
ENSG00000163449.9.vs.ENSG00000079246.14	2	BLCA,COAD
ENSG00000162779.19.vs.ENSG00000057252.11	1	LIHC
ENSG00000254029.1.vs.ENSG00000211678.2	1	STAD
ENSG00000142156.13.vs.ENSG00000274248.1	1	HNSC
ENSG00000258315.4.vs.ENSG00000161940.9	1	BRCA
ENSG00000269978.1.vs.ENSG00000270171.1	1	LUAD
ENSG00000224389.7.vs.ENSG00000231852.5	2	KIRC,BRCA
ENSG00000172508.9.vs.ENSG00000175463.10	3	STAD,BLCA,HNSC
ENSG00000223476.1.vs.ENSG00000198039.10	1	KIRC
ENSG00000159625.13.vs.ENSG00000182885.15	1	UCEC
ENSG00000198938.2.vs.ENSG00000198888.2	3	LIHC,PRAD,KIRC
ENSG00000182986.11.vs.ENSG00000198538.9	1	LIHC
ENSG00000109790.15.vs.ENSG00000249685.1	1	HNSC
ENSG00000244693.1.vs.ENSG00000204959.4	1	KIRC
ENSG00000139914.6.vs.ENSG00000092010.13	1	COAD
ENSG00000237439.1.vs.ENSG00000232707.1	1	PRAD
ENSG00000175318.10.vs.ENSG00000067225.16	1	LIHC
ENSG00000211650.2.vs.ENSG00000211649.3	2	LUAD,UCEC
ENSG00000107331.15.vs.ENSG00000180549.7	1	KIRP
ENSG00000229771.2.vs.ENSG00000204103.3	1	LUAD
ENSG00000267868.1.vs.ENSG00000235280.2	1	BRCA
ENSG00000103043.13.vs.ENSG00000157423.16	1	KIRP
ENSG00000234585.5.vs.ENSG00000226002.1	2	LIHC,LUSC
ENSG00000234327.6.vs.ENSG00000129204.15	3	STAD,BLCA,COAD
ENSG00000203485.11.vs.ENSG00000256050.2	2	STAD,BRCA
ENSG00000130203.8.vs.ENSG00000130208.8	3	LIHC,KIRC,BRCA
ENSG00000110090.11.vs.ENSG00000132749.9	1	LUAD
ENSG00000159712.10.vs.ENSG00000277103.1	1	STAD
ENSG00000222345.1.vs.ENSG00000280904.1	1	BLCA
ENSG00000170604.4.vs.ENSG00000176182.5	2	LIHC,BRCA
ENSG00000171931.11.vs.ENSG00000108448.19	4	LUAD,BLCA,HNSC,UCEC
ENSG00000129460.14.vs.ENSG00000157306.13	2	STAD,BRCA
ENSG00000165821.10.vs.ENSG00000165819.10	3	STAD,HNSC,UCEC
ENSG00000189319.12.vs.ENSG00000203791.12	1	LUAD
ENSG00000188739.13.vs.ENSG00000207181.1	2	LIHC,LUSC
ENSG00000198868.3.vs.ENSG00000248923.1	1	LIHC
ENSG00000201684.1.vs.ENSG00000274251.1	3	STAD,KIRP,BRCA
ENSG00000086967.9.vs.ENSG00000269404.5	3	LIHC,STAD,HNSC
ENSG00000234175.1.vs.ENSG00000228330.1	1	STAD
ENSG00000148600.13.vs.ENSG00000188373.4	2	STAD,PRAD
ENSG00000165802.18.vs.ENSG00000188833.8	3	LUAD,BLCA,HNSC
ENSG00000205955.4.vs.ENSG00000186038.8	1	STAD
ENSG00000254167.1.vs.ENSG00000211966.2	1	LUAD
ENSG00000152467.8.vs.ENSG00000176293.18	3	KIRP,BRCA,THCA
ENSG00000242114.4.vs.ENSG00000273350.1	1	KIRP
ENSG00000147439.10.vs.ENSG00000253200.1	2	LIHC,BLCA
ENSG00000264781.1.vs.ENSG00000265517.1	2	STAD,LUAD
ENSG00000111664.9.vs.ENSG00000250510.6	2	STAD,BRCA
ENSG00000241362.2.vs.ENSG00000166819.10	1	LIHC
ENSG00000165953.8.vs.ENSG00000170054.13	2	KIRC,BRCA
ENSG00000251323.2.vs.ENSG00000033327.11	1	BRCA
ENSG00000262877.4.vs.ENSG00000262223.5	4	COAD,KIRP,BRCA,UCEC
ENSG00000247498.8.vs.ENSG00000013588.5	1	BLCA
ENSG00000163435.14.vs.ENSG00000176393.9	2	LUSC,BLCA
ENSG00000166908.16.vs.ENSG00000178498.14	1	KIRP
ENSG00000269978.1.vs.ENSG00000270035.1	2	LUAD,HNSC
ENSG00000262228.2.vs.ENSG00000179409.9	3	STAD,BLCA,COAD
ENSG00000071889.15.vs.ENSG00000261773.1	1	HNSC
ENSG00000259910.1.vs.ENSG00000260403.1	1	KIRC
ENSG00000167925.14.vs.ENSG00000089558.7	1	STAD
ENSG00000124067.15.vs.ENSG00000141096.4	1	LIHC
ENSG00000170689.9.vs.ENSG00000120068.6	4	LUAD,LUSC,BLCA,HNSC
ENSG00000116584.16.vs.ENSG00000163479.12	2	LUAD,LUSC
ENSG00000172969.6.vs.ENSG00000242516.1	1	STAD
ENSG00000162063.11.vs.ENSG00000238098.7	1	COAD
ENSG00000090659.16.vs.ENSG00000182566.11	2	PRAD,BLCA
ENSG00000279587.1.vs.ENSG00000003096.12	1	STAD
ENSG00000092295.10.vs.ENSG00000092330.14	1	BRCA
ENSG00000161992.5.vs.ENSG00000257108.1	1	KIRC
ENSG00000189051.5.vs.ENSG00000161970.11	1	LUAD
ENSG00000164916.10.vs.ENSG00000242802.5	4	LIHC,STAD,LUSC,COAD
ENSG00000236878.1.vs.ENSG00000223549.1	2	COAD,BRCA
ENSG00000229292.1.vs.ENSG00000223638.3	1	UCEC
ENSG00000204882.3.vs.ENSG00000261655.1	2	PRAD,THCA
ENSG00000253240.1.vs.ENSG00000253359.1	1	STAD
ENSG00000000460.15.vs.ENSG00000239494.2	1	LIHC
ENSG00000227992.1.vs.ENSG00000271590.1	2	STAD,THCA
ENSG00000276405.1.vs.ENSG00000278030.1	2	LUSC,BRCA
ENSG00000225411.2.vs.ENSG00000232815.1	4	STAD,LUAD,LUSC,HNSC
ENSG00000120324.6.vs.ENSG00000197479.6	3	LUAD,HNSC,THCA
ENSG00000146872.16.vs.ENSG00000087995.14	2	BLCA,BRCA
ENSG00000254470.2.vs.ENSG00000255120.4	1	THCA
ENSG00000246334.2.vs.ENSG00000113758.12	1	HNSC
ENSG00000181666.16.vs.ENSG00000189164.13	2	LIHC,BRCA
ENSG00000196199.12.vs.ENSG00000226352.2	1	LIHC
ENSG00000205358.3.vs.ENSG00000198417.6	3	LIHC,LUAD,BLCA
ENSG00000262185.1.vs.ENSG00000162104.8	2	LIHC,KIRP
ENSG00000145757.14.vs.ENSG00000250240.4	1	STAD
ENSG00000188266.12.vs.ENSG00000136381.11	2	BRCA,UCEC
ENSG00000272573.4.vs.ENSG00000055955.14	2	LIHC,HNSC
ENSG00000253691.2.vs.ENSG00000253460.2	1	STAD
ENSG00000211698.2.vs.ENSG00000211697.3	2	PRAD,KIRP
ENSG00000230113.1.vs.ENSG00000265743.1	1	BLCA
ENSG00000176320.2.vs.ENSG00000229914.1	1	HNSC
ENSG00000173674.9.vs.ENSG00000177189.11	3	STAD,HNSC,KIRC
ENSG00000274963.1.vs.ENSG00000143384.11	2	LUAD,LUSC
ENSG00000161798.6.vs.ENSG00000086159.11	1	HNSC
ENSG00000262434.1.vs.ENSG00000167699.12	1	STAD
ENSG00000142609.16.vs.ENSG00000178821.11	1	LIHC
ENSG00000105650.20.vs.ENSG00000130518.15	1	HNSC
ENSG00000234705.1.vs.ENSG00000119333.10	2	STAD,LUSC
ENSG00000114391.11.vs.ENSG00000066422.4	3	HNSC,KIRC,UCEC
ENSG00000196196.2.vs.ENSG00000235387.1	1	BRCA
ENSG00000149541.8.vs.ENSG00000149499.10	1	KIRP
ENSG00000250748.5.vs.ENSG00000213344.2	2	HNSC,THCA
ENSG00000167414.4.vs.ENSG00000279161.1	1	LUSC
ENSG00000227758.1.vs.ENSG00000204642.12	1	KIRP
ENSG00000239605.7.vs.ENSG00000143933.15	1	STAD
ENSG00000271788.1.vs.ENSG00000177738.3	1	PRAD
ENSG00000133706.16.vs.ENSG00000173261.7	2	KIRP,BRCA
ENSG00000173692.11.vs.ENSG00000204128.5	1	BLCA
ENSG00000253345.1.vs.ENSG00000253957.1	1	STAD
ENSG00000227835.7.vs.ENSG00000229184.2	1	STAD
ENSG00000169905.11.vs.ENSG00000231966.1	1	LUSC
ENSG00000254017.1.vs.ENSG00000230225.1	1	STAD
ENSG00000227953.5.vs.ENSG00000143653.9	1	BRCA
ENSG00000120318.14.vs.ENSG00000197948.9	1	KIRP
ENSG00000211714.3.vs.ENSG00000211716.2	2	LUSC,PRAD
ENSG00000050405.12.vs.ENSG00000139624.11	1	COAD
ENSG00000115590.12.vs.ENSG00000281162.1	3	STAD,HNSC,KIRP
ENSG00000064547.12.vs.ENSG00000105717.12	1	LUSC
ENSG00000271757.1.vs.ENSG00000272301.1	2	KIRC,UCEC
ENSG00000129946.9.vs.ENSG00000181781.8	1	LUSC
ENSG00000211806.2.vs.ENSG00000211805.1	1	BRCA
ENSG00000086015.19.vs.ENSG00000236111.5	1	THCA
ENSG00000142675.16.vs.ENSG00000142684.7	1	LUSC
ENSG00000161999.10.vs.ENSG00000127585.10	1	BRCA
ENSG00000140983.12.vs.ENSG00000103269.12	2	HNSC,BRCA
ENSG00000251455.1.vs.ENSG00000251603.1	1	PRAD
ENSG00000234997.1.vs.ENSG00000272563.1	1	STAD
ENSG00000213714.1.vs.ENSG00000124103.8	2	STAD,BLCA
ENSG00000255045.1.vs.ENSG00000019102.10	1	PRAD
ENSG00000196415.8.vs.ENSG00000197561.5	4	LUAD,LUSC,PRAD,THCA
ENSG00000253768.1.vs.ENSG00000254164.1	1	BRCA
ENSG00000187634.9.vs.ENSG00000230699.2	3	HNSC,KIRC,KIRP
ENSG00000128713.12.vs.ENSG00000128714.5	1	KIRC
ENSG00000134242.14.vs.ENSG00000188761.10	1	KIRC
ENSG00000119673.13.vs.ENSG00000279026.1	1	BRCA
ENSG00000240032.1.vs.ENSG00000261051.1	3	LUSC,HNSC,BRCA
ENSG00000106333.11.vs.ENSG00000106336.11	2	HNSC,BRCA
ENSG00000150281.6.vs.ENSG00000260083.1	1	BRCA
ENSG00000233286.1.vs.ENSG00000236878.1	1	COAD
ENSG00000146859.6.vs.ENSG00000272941.1	3	LIHC,HNSC,KIRP
ENSG00000093134.12.vs.ENSG00000112303.12	3	STAD,COAD,KIRP
ENSG00000130545.14.vs.ENSG00000275234.1	2	BLCA,KIRP
ENSG00000186226.8.vs.ENSG00000240386.3	1	LUSC
ENSG00000204396.9.vs.ENSG00000201555.1	1	LUSC
ENSG00000268510.1.vs.ENSG00000272395.4	1	UCEC
ENSG00000204653.8.vs.ENSG00000131409.11	3	KIRC,KIRP,BRCA
ENSG00000136273.10.vs.ENSG00000164744.11	1	STAD
ENSG00000187742.13.vs.ENSG00000265112.1	1	COAD
ENSG00000225062.1.vs.ENSG00000237281.1	2	STAD,THCA
ENSG00000109944.9.vs.ENSG00000109943.7	2	LIHC,LUSC
ENSG00000211677.2.vs.ENSG00000211676.2	2	STAD,BLCA
ENSG00000152253.7.vs.ENSG00000073734.8	1	BRCA
ENSG00000167232.12.vs.ENSG00000269416.4	1	COAD
ENSG00000124541.6.vs.ENSG00000137171.13	2	LIHC,BRCA
ENSG00000140807.5.vs.ENSG00000261685.2	6	LIHC,LUAD,BLCA,COAD,THCA,UCEC
ENSG00000254461.1.vs.ENSG00000254855.1	2	STAD,LUSC
ENSG00000257141.1.vs.ENSG00000257398.5	1	PRAD
ENSG00000103507.12.vs.ENSG00000262766.1	3	COAD,HNSC,BRCA
ENSG00000147804.8.vs.ENSG00000160948.12	5	LIHC,STAD,LUAD,BLCA,COAD
ENSG00000222533.1.vs.ENSG00000238035.7	1	STAD
ENSG00000089101.16.vs.ENSG00000280229.1	1	BRCA
ENSG00000228278.3.vs.ENSG00000229314.5	5	LIHC,STAD,LUSC,BLCA,THCA
ENSG00000197768.9.vs.ENSG00000188986.4	3	LIHC,HNSC,KIRC
ENSG00000106479.9.vs.ENSG00000171130.16	2	COAD,KIRP
ENSG00000197858.9.vs.ENSG00000179091.4	1	COAD
ENSG00000265681.5.vs.ENSG00000263916.1	2	LUSC,KIRP
ENSG00000259702.1.vs.ENSG00000259348.1	4	STAD,KIRC,KIRP,BRCA
ENSG00000197978.9.vs.ENSG00000259429.4	4	STAD,BLCA,KIRC,BRCA
ENSG00000227306.1.vs.ENSG00000205864.1	1	LIHC
ENSG00000061273.16.vs.ENSG00000111424.9	1	KIRP
ENSG00000275400.1.vs.ENSG00000177418.2	1	LUSC
ENSG00000274315.1.vs.ENSG00000087502.16	1	LUAD
ENSG00000100068.10.vs.ENSG00000231466.2	3	LIHC,BLCA,KIRC
ENSG00000176953.9.vs.ENSG00000261067.5	2	COAD,UCEC
ENSG00000131759.16.vs.ENSG00000094804.8	2	STAD,BRCA
ENSG00000076248.9.vs.ENSG00000135093.11	1	KIRP
ENSG00000213672.6.vs.ENSG00000068745.13	2	PRAD,HNSC
ENSG00000133657.13.vs.ENSG00000178732.5	1	KIRC
ENSG00000228672.3.vs.ENSG00000170482.15	1	PRAD
ENSG00000115275.10.vs.ENSG00000204822.6	1	STAD
ENSG00000172789.3.vs.ENSG00000197757.7	1	STAD
ENSG00000215529.11.vs.ENSG00000101367.8	1	PRAD
ENSG00000148225.14.vs.ENSG00000165188.12	2	BLCA,HNSC
ENSG00000258465.5.vs.ENSG00000227741.1	2	LIHC,LUAD
ENSG00000279429.1.vs.ENSG00000224322.1	2	STAD,PRAD
ENSG00000175874.8.vs.ENSG00000196460.11	3	COAD,HNSC,BRCA
ENSG00000103313.10.vs.ENSG00000010539.10	1	LUAD
ENSG00000235631.1.vs.ENSG00000188050.2	1	THCA
ENSG00000121671.10.vs.ENSG00000121653.10	1	THCA
ENSG00000229417.1.vs.ENSG00000095585.15	3	PRAD,KIRC,BRCA
ENSG00000113600.9.vs.ENSG00000082074.14	1	KIRC
ENSG00000102898.10.vs.ENSG00000168286.2	3	LUSC,PRAD,KIRP
ENSG00000159314.10.vs.ENSG00000225190.7	1	LUAD
ENSG00000197110.7.vs.ENSG00000272395.4	1	UCEC
ENSG00000257671.1.vs.ENSG00000135477.10	1	LUAD
ENSG00000263751.1.vs.ENSG00000237111.1	2	STAD,LUAD
ENSG00000205662.2.vs.ENSG00000205663.5	1	KIRP
ENSG00000182511.10.vs.ENSG00000196547.13	1	BLCA
ENSG00000137561.4.vs.ENSG00000137563.10	3	BLCA,KIRC,UCEC
ENSG00000215478.7.vs.ENSG00000133519.11	1	KIRP
ENSG00000272909.1.vs.ENSG00000089775.10	1	BRCA
ENSG00000184305.13.vs.ENSG00000279013.1	3	LUAD,PRAD,HNSC
ENSG00000270038.1.vs.ENSG00000187621.13	1	STAD
ENSG00000242125.3.vs.ENSG00000204138.11	3	LIHC,BRCA,THCA
ENSG00000214534.4.vs.ENSG00000254978.2	1	KIRC
ENSG00000263413.2.vs.ENSG00000211904.2	1	LUAD
ENSG00000164414.15.vs.ENSG00000272514.4	1	BRCA
ENSG00000280010.1.vs.ENSG00000242689.2	1	LIHC
ENSG00000158158.10.vs.ENSG00000168763.14	3	LIHC,COAD,BRCA
ENSG00000273172.1.vs.ENSG00000272636.3	1	STAD
ENSG00000211721.2.vs.ENSG00000253409.1	2	LUSC,BRCA
ENSG00000187922.12.vs.ENSG00000233016.5	1	PRAD
ENSG00000211950.2.vs.ENSG00000211949.3	2	LUAD,BLCA
ENSG00000246016.2.vs.ENSG00000244361.1	1	LUAD
ENSG00000188460.4.vs.ENSG00000227621.1	1	LIHC
ENSG00000182531.7.vs.ENSG00000228547.5	1	THCA
ENSG00000176092.12.vs.ENSG00000176083.16	2	LIHC,PRAD
ENSG00000211459.2.vs.ENSG00000198899.2	3	LIHC,KIRC,THCA
ENSG00000182809.9.vs.ENSG00000185347.16	2	KIRC,BRCA
ENSG00000263080.1.vs.ENSG00000262703.1	2	LUSC,COAD
ENSG00000107625.11.vs.ENSG00000165732.11	1	BRCA
ENSG00000271984.1.vs.ENSG00000100979.13	1	BLCA
ENSG00000242866.8.vs.ENSG00000168781.20	1	UCEC
ENSG00000181007.8.vs.ENSG00000142065.12	1	BRCA
ENSG00000267206.4.vs.ENSG00000204001.8	2	KIRC,THCA
ENSG00000149243.14.vs.ENSG00000158555.13	1	BRCA
ENSG00000263812.4.vs.ENSG00000266256.1	1	LIHC
ENSG00000265118.4.vs.ENSG00000126861.4	1	BRCA
ENSG00000171931.11.vs.ENSG00000171928.12	2	HNSC,UCEC
ENSG00000196503.2.vs.ENSG00000249693.2	1	HNSC
ENSG00000157020.16.vs.ENSG00000157087.15	2	STAD,THCA
ENSG00000252673.1.vs.ENSG00000276599.1	1	UCEC
ENSG00000113722.15.vs.ENSG00000011083.7	4	STAD,LUAD,BLCA,HNSC
ENSG00000265009.1.vs.ENSG00000257989.1	1	KIRP
ENSG00000185800.10.vs.ENSG00000104941.6	1	UCEC
ENSG00000272128.1.vs.ENSG00000129691.14	1	LUAD
ENSG00000115286.18.vs.ENSG00000160953.13	1	LUSC
ENSG00000117222.12.vs.ENSG00000174529.7	4	LIHC,LUAD,LUSC,BLCA
ENSG00000197557.6.vs.ENSG00000128655.15	2	LUSC,BLCA
ENSG00000167676.3.vs.ENSG00000214456.7	2	LIHC,BLCA
ENSG00000064687.11.vs.ENSG00000064666.13	1	LUAD
ENSG00000225378.1.vs.ENSG00000225024.1	1	KIRC
ENSG00000251893.2.vs.ENSG00000258088.1	1	COAD
ENSG00000275743.1.vs.ENSG00000276819.1	1	BRCA
ENSG00000100197.19.vs.ENSG00000205702.9	2	COAD,BRCA
ENSG00000198758.9.vs.ENSG00000134202.9	1	LUAD
ENSG00000279365.1.vs.ENSG00000230479.1	2	STAD,KIRC
ENSG00000005249.11.vs.ENSG00000105856.12	2	COAD,UCEC
ENSG00000250656.2.vs.ENSG00000270228.1	1	KIRC
ENSG00000176454.12.vs.ENSG00000259904.1	1	PRAD
ENSG00000196923.12.vs.ENSG00000113758.12	5	LIHC,LUAD,COAD,HNSC,THCA
ENSG00000168703.5.vs.ENSG00000175121.10	2	LUAD,PRAD
ENSG00000161896.9.vs.ENSG00000137288.8	3	STAD,HNSC,KIRC
ENSG00000253120.1.vs.ENSG00000211656.3	1	STAD
ENSG00000113212.6.vs.ENSG00000272674.3	2	HNSC,THCA
ENSG00000279068.1.vs.ENSG00000120322.3	3	LUAD,COAD,HNSC
ENSG00000225556.1.vs.ENSG00000143365.15	1	LUAD
ENSG00000218672.1.vs.ENSG00000260426.1	2	PRAD,KIRC
ENSG00000073150.12.vs.ENSG00000073146.14	1	PRAD
ENSG00000207340.1.vs.ENSG00000272824.1	1	BLCA
ENSG00000226450.2.vs.ENSG00000205702.9	2	LIHC,BRCA
ENSG00000094631.17.vs.ENSG00000102145.12	2	HNSC,BRCA
ENSG00000180198.14.vs.ENSG00000279443.1	2	LIHC,KIRP
ENSG00000248265.1.vs.ENSG00000198353.7	1	STAD
ENSG00000210082.2.vs.ENSG00000198938.2	5	LIHC,STAD,PRAD,KIRC,THCA
ENSG00000280229.1.vs.ENSG00000173404.4	1	BRCA
ENSG00000142534.5.vs.ENSG00000142541.15	3	HNSC,KIRP,UCEC
ENSG00000120875.7.vs.ENSG00000260253.1	1	STAD
ENSG00000235687.7.vs.ENSG00000236313.1	1	BRCA
ENSG00000233980.1.vs.ENSG00000250614.1	1	LUAD
ENSG00000226145.6.vs.ENSG00000227300.11	1	BRCA
ENSG00000116489.11.vs.ENSG00000155363.17	1	PRAD
ENSG00000198938.2.vs.ENSG00000211459.2	4	LIHC,STAD,KIRC,THCA
ENSG00000211917.1.vs.ENSG00000211911.1	1	UCEC
ENSG00000142188.15.vs.ENSG00000177692.10	2	BRCA,UCEC
ENSG00000211710.3.vs.ENSG00000237702.2	3	LUSC,PRAD,BLCA
ENSG00000111046.3.vs.ENSG00000111049.3	1	HNSC
ENSG00000264943.1.vs.ENSG00000248121.7	1	HNSC
ENSG00000163069.11.vs.ENSG00000188993.3	2	STAD,KIRC
ENSG00000081154.10.vs.ENSG00000174173.6	1	KIRC
ENSG00000278831.1.vs.ENSG00000107902.12	1	LUAD
ENSG00000247728.2.vs.ENSG00000270016.1	1	BRCA
ENSG00000253274.1.vs.ENSG00000211972.2	1	STAD
ENSG00000117155.15.vs.ENSG00000180869.4	1	STAD
ENSG00000171346.12.vs.ENSG00000171401.13	1	COAD
ENSG00000173991.5.vs.ENSG00000141744.3	3	BLCA,COAD,BRCA
ENSG00000177791.11.vs.ENSG00000166317.10	3	PRAD,HNSC,UCEC
ENSG00000188807.11.vs.ENSG00000171612.6	2	LIHC,KIRC
ENSG00000279010.1.vs.ENSG00000280527.1	8	LUSC,PRAD,BLCA,COAD,HNSC,KIRC,BRCA,UCEC
ENSG00000258441.1.vs.ENSG00000092199.16	2	LIHC,LUAD
ENSG00000198840.2.vs.ENSG00000211459.2	3	LIHC,LUAD,THCA
ENSG00000273305.1.vs.ENSG00000229689.3	2	COAD,KIRC
ENSG00000234773.5.vs.ENSG00000196646.10	1	LIHC
ENSG00000113638.11.vs.ENSG00000132356.10	2	LUSC,KIRC
ENSG00000211764.1.vs.ENSG00000211771.1	2	LUSC,BRCA
ENSG00000097096.8.vs.ENSG00000280099.1	5	STAD,LUAD,COAD,KIRC,BRCA
ENSG00000253893.2.vs.ENSG00000253981.4	1	HNSC
ENSG00000224559.2.vs.ENSG00000204434.5	3	STAD,PRAD,HNSC
ENSG00000157510.12.vs.ENSG00000164284.13	1	LIHC
ENSG00000139597.15.vs.ENSG00000244754.7	2	LIHC,STAD
ENSG00000213928.7.vs.ENSG00000199804.1	2	LIHC,LUAD
ENSG00000276354.1.vs.ENSG00000125351.9	1	LIHC
ENSG00000156983.14.vs.ENSG00000114026.20	2	LUSC,HNSC
ENSG00000254029.1.vs.ENSG00000211679.2	1	STAD
ENSG00000171431.3.vs.ENSG00000187242.4	3	STAD,LUAD,KIRC
ENSG00000116017.9.vs.ENSG00000065268.9	3	LIHC,BLCA,HNSC
ENSG00000188158.13.vs.ENSG00000047634.13	2	BLCA,UCEC
ENSG00000260284.1.vs.ENSG00000260710.1	4	STAD,PRAD,COAD,BRCA
ENSG00000132832.8.vs.ENSG00000196839.11	1	COAD
ENSG00000266075.2.vs.ENSG00000272153.1	1	STAD
ENSG00000265996.1.vs.ENSG00000231485.1	1	STAD
ENSG00000217261.4.vs.ENSG00000226287.6	1	BRCA
ENSG00000232434.2.vs.ENSG00000177943.12	3	LIHC,HNSC,KIRC
ENSG00000162571.12.vs.ENSG00000272141.1	3	HNSC,KIRP,BRCA
ENSG00000274427.1.vs.ENSG00000278112.1	1	BRCA
ENSG00000243264.2.vs.ENSG00000239571.1	1	BRCA
ENSG00000167524.13.vs.ENSG00000264608.1	5	LIHC,LUAD,LUSC,COAD,BRCA
ENSG00000186625.12.vs.ENSG00000233330.1	1	PRAD
ENSG00000143614.7.vs.ENSG00000198837.8	2	LUAD,HNSC
ENSG00000215481.7.vs.ENSG00000100031.17	1	COAD
ENSG00000132388.11.vs.ENSG00000185722.15	5	STAD,BLCA,COAD,HNSC,BRCA
ENSG00000262587.2.vs.ENSG00000262155.1	1	LUSC
ENSG00000240288.6.vs.ENSG00000157014.9	1	COAD
ENSG00000267834.1.vs.ENSG00000148341.16	1	LIHC
ENSG00000147872.8.vs.ENSG00000147874.9	1	LIHC
ENSG00000205302.5.vs.ENSG00000260686.1	2	PRAD,BRCA
ENSG00000271715.1.vs.ENSG00000164237.7	1	PRAD
ENSG00000260743.1.vs.ENSG00000171109.17	1	HNSC
ENSG00000254029.1.vs.ENSG00000222037.5	1	STAD
ENSG00000254017.1.vs.ENSG00000236254.1	1	STAD
ENSG00000011451.16.vs.ENSG00000105122.11	1	BRCA
ENSG00000136098.15.vs.ENSG00000217576.7	1	BRCA
ENSG00000253730.1.vs.ENSG00000261959.1	1	BRCA
ENSG00000105219.7.vs.ENSG00000105221.15	2	LIHC,LUAD
ENSG00000161642.16.vs.ENSG00000161638.9	2	LUAD,KIRC
ENSG00000210082.2.vs.ENSG00000212907.2	3	LIHC,PRAD,THCA
ENSG00000167895.13.vs.ENSG00000187997.10	2	COAD,HNSC
ENSG00000127191.16.vs.ENSG00000213590.2	2	LIHC,HNSC
ENSG00000178460.16.vs.ENSG00000104205.11	1	UCEC
ENSG00000070476.13.vs.ENSG00000159650.7	1	KIRC
ENSG00000175189.3.vs.ENSG00000139269.2	2	LIHC,PRAD
ENSG00000233975.1.vs.ENSG00000126709.13	3	BLCA,HNSC,BRCA
ENSG00000274750.1.vs.ENSG00000218281.1	2	LUSC,HNSC
ENSG00000223715.1.vs.ENSG00000232461.1	2	THCA,UCEC
ENSG00000130723.16.vs.ENSG00000130714.14	1	COAD
ENSG00000257027.1.vs.ENSG00000069493.13	2	PRAD,BLCA
ENSG00000162194.11.vs.ENSG00000185085.2	2	LUAD,THCA
ENSG00000123395.13.vs.ENSG00000123358.18	3	LUAD,KIRP,UCEC
ENSG00000268906.1.vs.ENSG00000268390.1	1	PRAD
ENSG00000065978.16.vs.ENSG00000171960.9	1	BRCA
ENSG00000170677.5.vs.ENSG00000266258.1	2	PRAD,BLCA
ENSG00000063015.18.vs.ENSG00000109118.12	2	STAD,BLCA
ENSG00000143437.19.vs.ENSG00000143387.11	1	KIRP
ENSG00000230798.4.vs.ENSG00000224209.5	1	LUAD
ENSG00000163611.10.vs.ENSG00000206530.7	3	LIHC,HNSC,KIRC
ENSG00000236039.1.vs.ENSG00000226598.1	2	LUSC,KIRP
ENSG00000275312.1.vs.ENSG00000230501.1	4	STAD,LUSC,BLCA,HNSC
ENSG00000242887.1.vs.ENSG00000265714.1	2	STAD,LUAD
ENSG00000271155.1.vs.ENSG00000271659.1	3	LUSC,BLCA,HNSC
ENSG00000164104.10.vs.ENSG00000248774.1	3	COAD,KIRC,THCA
ENSG00000266718.1.vs.ENSG00000176749.7	1	HNSC
ENSG00000171346.12.vs.ENSG00000171345.12	3	STAD,PRAD,COAD
ENSG00000120093.10.vs.ENSG00000120068.6	5	LUAD,LUSC,BLCA,HNSC,THCA
ENSG00000060558.3.vs.ENSG00000125910.5	3	LIHC,BLCA,KIRP
ENSG00000268047.1.vs.ENSG00000269352.1	4	LIHC,STAD,LUAD,KIRP
ENSG00000228079.2.vs.ENSG00000197329.10	1	LUAD
ENSG00000267194.1.vs.ENSG00000108984.12	2	BLCA,BRCA
ENSG00000168028.12.vs.ENSG00000144659.9	1	STAD
ENSG00000253483.1.vs.ENSG00000253986.1	2	HNSC,THCA
ENSG00000143793.11.vs.ENSG00000162910.17	2	LIHC,HNSC
ENSG00000230747.1.vs.ENSG00000144028.13	1	LIHC
ENSG00000126267.7.vs.ENSG00000105668.6	1	COAD
ENSG00000179776.16.vs.ENSG00000246898.1	1	THCA
ENSG00000124802.10.vs.ENSG00000188428.15	2	LUSC,BRCA
ENSG00000141101.11.vs.ENSG00000260290.2	1	THCA
ENSG00000198429.8.vs.ENSG00000171291.7	2	PRAD,HNSC
ENSG00000253345.1.vs.ENSG00000211949.3	1	STAD
ENSG00000253785.1.vs.ENSG00000113732.7	2	STAD,COAD
ENSG00000237547.1.vs.ENSG00000263413.2	2	STAD,LUAD
ENSG00000196242.7.vs.ENSG00000227135.1	1	PRAD
ENSG00000262362.1.vs.ENSG00000184697.6	1	THCA
ENSG00000275092.1.vs.ENSG00000206053.11	1	LUSC
ENSG00000158373.8.vs.ENSG00000168298.5	1	HNSC
ENSG00000211674.2.vs.ENSG00000211677.2	1	STAD
ENSG00000253590.1.vs.ENSG00000211667.2	1	STAD
ENSG00000277476.1.vs.ENSG00000278730.1	1	STAD
ENSG00000087088.18.vs.ENSG00000267898.1	1	BRCA
ENSG00000093134.12.vs.ENSG00000112299.7	2	PRAD,BRCA
ENSG00000226479.3.vs.ENSG00000224789.1	1	STAD
ENSG00000263311.1.vs.ENSG00000277481.1	1	LIHC
ENSG00000179299.15.vs.ENSG00000250906.1	1	BRCA
ENSG00000129315.8.vs.ENSG00000139620.11	1	LIHC
ENSG00000144579.6.vs.ENSG00000018280.15	1	BRCA
ENSG00000280046.1.vs.ENSG00000132510.9	4	STAD,LUSC,BRCA,UCEC
ENSG00000104856.12.vs.ENSG00000207003.1	1	LUAD
ENSG00000259997.2.vs.ENSG00000233732.5	1	STAD
ENSG00000104827.12.vs.ENSG00000104826.10	1	BLCA
ENSG00000145911.5.vs.ENSG00000145916.17	1	BLCA
ENSG00000082781.10.vs.ENSG00000173702.6	3	STAD,HNSC,BRCA
ENSG00000090470.13.vs.ENSG00000246922.7	1	BRCA
ENSG00000278737.1.vs.ENSG00000246922.7	1	BRCA
ENSG00000129354.10.vs.ENSG00000129355.6	1	THCA
ENSG00000266028.6.vs.ENSG00000263528.6	2	HNSC,BRCA
ENSG00000100350.13.vs.ENSG00000100353.16	2	LUAD,KIRC
ENSG00000223774.4.vs.ENSG00000198892.6	3	LUAD,PRAD,UCEC
ENSG00000226055.2.vs.ENSG00000213839.4	1	LUSC
ENSG00000179111.7.vs.ENSG00000179148.8	1	COAD
ENSG00000234518.2.vs.ENSG00000162645.11	3	BLCA,HNSC,KIRC
ENSG00000173611.16.vs.ENSG00000119414.10	2	COAD,BRCA
ENSG00000196407.10.vs.ENSG00000225556.1	1	PRAD
ENSG00000278244.1.vs.ENSG00000273811.1	1	BRCA
ENSG00000080644.14.vs.ENSG00000117971.10	3	LIHC,LUSC,BRCA
ENSG00000198899.2.vs.ENSG00000198786.2	3	LIHC,PRAD,KIRC
ENSG00000277452.1.vs.ENSG00000237781.3	2	LUAD,LUSC
ENSG00000223549.1.vs.ENSG00000227788.1	1	BRCA
ENSG00000211662.2.vs.ENSG00000211663.2	3	PRAD,BLCA,COAD
ENSG00000280135.1.vs.ENSG00000146285.12	2	LUSC,PRAD
ENSG00000233198.3.vs.ENSG00000198569.8	4	BLCA,HNSC,KIRC,BRCA
ENSG00000090932.9.vs.ENSG00000186838.12	3	STAD,KIRP,THCA
ENSG00000105355.7.vs.ENSG00000127666.9	4	STAD,LUAD,LUSC,UCEC
ENSG00000280401.1.vs.ENSG00000148730.6	2	BRCA,UCEC
ENSG00000257950.3.vs.ENSG00000262903.1	2	LIHC,PRAD
ENSG00000099337.4.vs.ENSG00000099338.21	1	LIHC
[truncated: 1,010 more rows]

## Sheet: CG2-up_vs_down
gene pair	number of TCGA datasets	TCGA datasets
ENSG00000175265.16.vs.ENSG00000259904.1	1	PRAD
ENSG00000158014.13.vs.ENSG00000158022.6	1	PRAD
ENSG00000128591.14.vs.ENSG00000272899.2	1	HNSC
ENSG00000044446.10.vs.ENSG00000173698.16	1	KIRP
ENSG00000142677.3.vs.ENSG00000142661.17	1	PRAD
ENSG00000274180.1.vs.ENSG00000266563.1	1	COAD
ENSG00000112941.11.vs.ENSG00000251365.1	1	LUAD
ENSG00000211459.2.vs.ENSG00000212907.2	1	BRCA
ENSG00000272908.1.vs.ENSG00000211695.2	1	PRAD
ENSG00000071203.8.vs.ENSG00000204979.6	1	STAD
ENSG00000171611.8.vs.ENSG00000137161.15	1	UCEC
ENSG00000136840.17.vs.ENSG00000160408.13	2	PRAD,BRCA
ENSG00000275542.1.vs.ENSG00000275966.1	1	PRAD
ENSG00000106153.12.vs.ENSG00000164776.8	2	HNSC,KIRC
ENSG00000163820.13.vs.ENSG00000163818.15	1	KIRC
ENSG00000256167.1.vs.ENSG00000228607.2	1	BRCA
ENSG00000124942.12.vs.ENSG00000254772.8	1	COAD
ENSG00000261556.7.vs.ENSG00000223496.2	1	KIRP
ENSG00000177025.3.vs.ENSG00000166704.10	1	KIRC
ENSG00000250321.1.vs.ENSG00000251535.1	1	COAD
ENSG00000115266.10.vs.ENSG00000115268.8	1	UCEC
ENSG00000140961.11.vs.ENSG00000103154.8	1	STAD
ENSG00000108671.8.vs.ENSG00000176749.7	1	HNSC
ENSG00000170374.5.vs.ENSG00000094914.11	1	LUAD
ENSG00000091073.18.vs.ENSG00000243566.5	1	STAD
ENSG00000136840.17.vs.ENSG00000167103.10	1	STAD
ENSG00000106789.11.vs.ENSG00000095383.18	1	PRAD
ENSG00000109854.12.vs.ENSG00000185238.11	1	LIHC
ENSG00000259848.7.vs.ENSG00000231331.1	1	LUAD
ENSG00000198346.9.vs.ENSG00000213777.5	1	PRAD
ENSG00000115266.10.vs.ENSG00000268798.1	1	UCEC
ENSG00000108784.8.vs.ENSG00000267185.1	1	LIHC
ENSG00000173041.10.vs.ENSG00000235349.1	1	KIRC
ENSG00000149591.15.vs.ENSG00000149577.14	1	STAD
ENSG00000187955.10.vs.ENSG00000254343.2	1	PRAD
ENSG00000092295.10.vs.ENSG00000100949.13	1	LUAD
ENSG00000230838.1.vs.ENSG00000237525.5	1	LUAD
ENSG00000165923.14.vs.ENSG00000109920.11	1	LUAD
ENSG00000079999.12.vs.ENSG00000180739.13	1	LUSC
ENSG00000163050.15.vs.ENSG00000143801.15	3	LUAD,KIRP,UCEC
ENSG00000135248.14.vs.ENSG00000128595.15	2	LUSC,BRCA
ENSG00000225313.4.vs.ENSG00000160094.13	1	BLCA
ENSG00000125910.5.vs.ENSG00000125912.9	1	LIHC
ENSG00000263105.1.vs.ENSG00000185739.12	1	HNSC
ENSG00000148346.10.vs.ENSG00000171159.4	1	BRCA
ENSG00000125753.12.vs.ENSG00000213889.9	1	BRCA
ENSG00000135828.10.vs.ENSG00000143333.6	1	PRAD
ENSG00000066084.11.vs.ENSG00000271018.1	1	UCEC
ENSG00000168453.13.vs.ENSG00000275074.1	1	KIRP
ENSG00000268529.1.vs.ENSG00000197446.7	1	STAD
ENSG00000272264.1.vs.ENSG00000076554.14	1	STAD
ENSG00000185028.3.vs.ENSG00000153404.12	1	KIRC
ENSG00000177830.16.vs.ENSG00000250397.2	1	BRCA
ENSG00000109758.7.vs.ENSG00000159788.17	1	KIRC
ENSG00000272153.1.vs.ENSG00000235169.6	1	LUAD
ENSG00000161513.10.vs.ENSG00000172782.10	1	KIRC
ENSG00000010327.9.vs.ENSG00000010322.14	1	LIHC
ENSG00000167757.12.vs.ENSG00000129451.10	1	STAD
ENSG00000022277.11.vs.ENSG00000280387.1	1	STAD
ENSG00000123453.15.vs.ENSG00000225756.1	1	LUAD
ENSG00000166473.15.vs.ENSG00000140905.8	1	COAD
ENSG00000226321.5.vs.ENSG00000162804.12	1	STAD
ENSG00000148090.10.vs.ENSG00000273381.1	1	COAD
ENSG00000258884.1.vs.ENSG00000165914.13	1	PRAD
ENSG00000120948.14.vs.ENSG00000271895.2	1	HNSC
ENSG00000144061.11.vs.ENSG00000144063.3	1	PRAD
ENSG00000120029.11.vs.ENSG00000120049.17	1	BRCA
ENSG00000120669.14.vs.ENSG00000242715.6	1	BRCA
ENSG00000118160.12.vs.ENSG00000105419.16	2	LIHC,BRCA
ENSG00000114854.6.vs.ENSG00000010319.5	1	BRCA
ENSG00000234667.1.vs.ENSG00000164076.15	1	STAD
ENSG00000221986.5.vs.ENSG00000134222.15	1	COAD
ENSG00000197256.9.vs.ENSG00000130158.12	1	KIRP
ENSG00000136932.12.vs.ENSG00000136929.11	1	THCA
ENSG00000114544.14.vs.ENSG00000144908.12	2	PRAD,KIRC
ENSG00000059145.17.vs.ENSG00000260425.1	1	KIRC
ENSG00000127412.5.vs.ENSG00000197993.6	1	STAD
ENSG00000182866.15.vs.ENSG00000183615.5	1	PRAD
ENSG00000242866.8.vs.ENSG00000166762.15	1	BRCA
ENSG00000170482.15.vs.ENSG00000170476.14	1	LUAD
ENSG00000167741.9.vs.ENSG00000132382.13	1	LIHC
ENSG00000250378.1.vs.ENSG00000145832.11	1	KIRC
ENSG00000167800.9.vs.ENSG00000255318.1	2	LUAD,BRCA
ENSG00000175066.14.vs.ENSG00000114126.16	1	BRCA
ENSG00000185038.13.vs.ENSG00000241635.6	1	LUAD
ENSG00000160117.13.vs.ENSG00000130312.5	1	STAD
ENSG00000104957.12.vs.ENSG00000037757.12	1	COAD
ENSG00000089280.17.vs.ENSG00000261359.2	1	LIHC
ENSG00000232810.3.vs.ENSG00000226979.7	1	BRCA
ENSG00000240849.9.vs.ENSG00000244687.10	1	COAD
ENSG00000100097.10.vs.ENSG00000273899.3	1	LIHC
ENSG00000119414.10.vs.ENSG00000235332.2	1	STAD
ENSG00000196465.9.vs.ENSG00000139641.11	1	STAD
ENSG00000167994.10.vs.ENSG00000221968.7	1	KIRP
ENSG00000262370.4.vs.ENSG00000130182.6	3	STAD,LUAD,BLCA
ENSG00000167800.9.vs.ENSG00000167799.8	1	LUAD
ENSG00000203877.6.vs.ENSG00000065615.12	1	BRCA
ENSG00000280239.1.vs.ENSG00000167670.14	1	KIRC
ENSG00000117682.15.vs.ENSG00000198830.9	2	KIRC,BRCA
ENSG00000119335.15.vs.ENSG00000160447.6	1	KIRP
ENSG00000135407.9.vs.ENSG00000175215.8	1	STAD
ENSG00000255508.6.vs.ENSG00000124942.12	1	COAD
ENSG00000166592.10.vs.ENSG00000166589.11	2	THCA,UCEC
ENSG00000101052.11.vs.ENSG00000101049.13	1	THCA
ENSG00000162460.6.vs.ENSG00000162458.11	1	BRCA
ENSG00000185527.10.vs.ENSG00000182446.12	1	BRCA
ENSG00000057468.6.vs.ENSG00000137955.14	1	COAD
ENSG00000261643.1.vs.ENSG00000163956.9	1	BRCA
ENSG00000132554.18.vs.ENSG00000156509.12	1	COAD
ENSG00000185633.9.vs.ENSG00000185482.6	1	HNSC
ENSG00000196187.10.vs.ENSG00000243709.1	2	STAD,KIRC
ENSG00000229719.3.vs.ENSG00000110047.16	1	KIRC
ENSG00000160991.14.vs.ENSG00000128563.12	1	LIHC
ENSG00000132004.11.vs.ENSG00000095059.14	1	LIHC
ENSG00000185019.15.vs.ENSG00000088899.13	1	HNSC
ENSG00000162458.11.vs.ENSG00000224321.1	2	BRCA,THCA
ENSG00000078081.6.vs.ENSG00000078070.10	1	HNSC
ENSG00000267978.4.vs.ENSG00000269556.6	2	STAD,HNSC
ENSG00000111276.9.vs.ENSG00000178878.11	1	KIRC
ENSG00000280987.1.vs.ENSG00000120727.11	1	LUAD
ENSG00000165275.8.vs.ENSG00000070601.8	1	COAD
ENSG00000105642.14.vs.ENSG00000007080.9	1	BRCA
ENSG00000181652.17.vs.ENSG00000243433.1	1	LIHC
ENSG00000005961.16.vs.ENSG00000161682.13	1	BLCA
ENSG00000161956.11.vs.ENSG00000239697.9	1	STAD
ENSG00000168918.12.vs.ENSG00000085978.20	1	LUAD
ENSG00000143452.14.vs.ENSG00000163131.9	1	STAD
ENSG00000260841.1.vs.ENSG00000131446.14	1	BRCA
ENSG00000107281.8.vs.ENSG00000180549.7	1	HNSC
ENSG00000144230.15.vs.ENSG00000169994.17	1	LIHC
ENSG00000125046.13.vs.ENSG00000180914.9	1	LIHC
ENSG00000126218.10.vs.ENSG00000126231.12	1	THCA
ENSG00000214050.6.vs.ENSG00000253690.1	1	UCEC
ENSG00000174444.13.vs.ENSG00000261351.2	1	LUAD
ENSG00000204010.3.vs.ENSG00000185745.9	1	KIRC
ENSG00000173674.9.vs.ENSG00000184368.14	2	STAD,KIRC
ENSG00000161031.11.vs.ENSG00000105122.11	1	LIHC
ENSG00000233806.6.vs.ENSG00000188011.5	1	BLCA
ENSG00000116786.10.vs.ENSG00000162460.6	2	KIRC,BRCA
ENSG00000267048.1.vs.ENSG00000258947.5	1	BLCA
ENSG00000167100.13.vs.ENSG00000108819.10	1	BRCA
ENSG00000168993.13.vs.ENSG00000249592.4	1	LUAD
ENSG00000211772.7.vs.ENSG00000270672.1	2	LIHC,LUSC
ENSG00000145819.14.vs.ENSG00000236714.1	1	UCEC
ENSG00000167619.10.vs.ENSG00000188368.8	1	BRCA
ENSG00000133250.12.vs.ENSG00000142347.15	1	LIHC
ENSG00000159625.13.vs.ENSG00000140854.11	1	COAD
ENSG00000120709.9.vs.ENSG00000120733.12	1	KIRC
ENSG00000198569.8.vs.ENSG00000188229.5	1	LUSC
ENSG00000184313.18.vs.ENSG00000243725.5	1	COAD
ENSG00000125611.14.vs.ENSG00000125630.14	1	PRAD
ENSG00000110169.9.vs.ENSG00000110171.17	1	STAD
ENSG00000102898.10.vs.ENSG00000263126.1	2	LUSC,BLCA
ENSG00000215005.2.vs.ENSG00000156239.10	1	COAD
ENSG00000145107.14.vs.ENSG00000163960.10	2	LUSC,KIRC
ENSG00000162194.11.vs.ENSG00000162191.12	1	HNSC
ENSG00000172061.8.vs.ENSG00000178772.6	2	LIHC,STAD
ENSG00000178752.14.vs.ENSG00000168427.8	1	HNSC
ENSG00000102003.9.vs.ENSG00000012211.11	1	PRAD
ENSG00000166794.4.vs.ENSG00000169118.14	1	LIHC
ENSG00000128610.10.vs.ENSG00000081803.14	1	BRCA
ENSG00000162511.7.vs.ENSG00000162510.5	1	LIHC
ENSG00000136286.13.vs.ENSG00000232956.7	1	BRCA
ENSG00000148362.9.vs.ENSG00000214402.6	1	STAD
ENSG00000211685.3.vs.ENSG00000211682.2	1	UCEC
ENSG00000146410.10.vs.ENSG00000237596.5	1	LUSC
ENSG00000144045.12.vs.ENSG00000115289.11	1	LUAD
ENSG00000204592.8.vs.ENSG00000236603.2	1	COAD
ENSG00000273899.3.vs.ENSG00000100106.18	1	LIHC
ENSG00000186409.13.vs.ENSG00000171960.9	1	LUSC
ENSG00000175602.3.vs.ENSG00000172543.6	2	PRAD,COAD
ENSG00000196923.12.vs.ENSG00000146094.12	2	STAD,BRCA
ENSG00000143412.8.vs.ENSG00000231073.1	1	LIHC
ENSG00000140367.10.vs.ENSG00000167196.12	1	THCA
ENSG00000111196.8.vs.ENSG00000256667.5	1	HNSC
ENSG00000173041.10.vs.ENSG00000213642.3	2	HNSC,KIRC
ENSG00000105227.13.vs.ENSG00000160396.8	1	LUSC
ENSG00000151651.14.vs.ENSG00000130640.12	1	BRCA
ENSG00000279821.1.vs.ENSG00000113758.12	2	STAD,BRCA
ENSG00000003402.18.vs.ENSG00000003400.13	1	UCEC
ENSG00000248734.2.vs.ENSG00000153113.22	1	LIHC
ENSG00000088899.13.vs.ENSG00000215251.3	1	HNSC
ENSG00000267355.2.vs.ENSG00000035862.11	3	STAD,PRAD,KIRP
ENSG00000179820.14.vs.ENSG00000126583.9	1	LUSC
ENSG00000116032.5.vs.ENSG00000065268.9	1	LIHC
ENSG00000115524.14.vs.ENSG00000213104.3	1	COAD
ENSG00000203710.9.vs.ENSG00000197721.15	1	LIHC
ENSG00000129757.11.vs.ENSG00000254827.4	1	BRCA
ENSG00000130433.6.vs.ENSG00000142408.2	1	HNSC
ENSG00000196116.7.vs.ENSG00000136842.12	1	BRCA
ENSG00000258082.1.vs.ENSG00000238005.2	1	STAD
ENSG00000178401.13.vs.ENSG00000123352.16	1	LUAD
ENSG00000187164.16.vs.ENSG00000148704.11	1	PRAD
ENSG00000005961.16.vs.ENSG00000186566.10	1	BLCA
ENSG00000204950.3.vs.ENSG00000255931.1	1	STAD
ENSG00000141298.16.vs.ENSG00000167549.17	1	LIHC
ENSG00000111196.8.vs.ENSG00000060140.7	1	LIHC
ENSG00000149782.10.vs.ENSG00000173486.11	1	STAD
ENSG00000134070.4.vs.ENSG00000157014.9	1	STAD
ENSG00000113812.12.vs.ENSG00000113811.9	1	LIHC
ENSG00000123349.12.vs.ENSG00000135476.10	1	LIHC
ENSG00000133789.13.vs.ENSG00000246273.5	1	LUAD
ENSG00000004975.10.vs.ENSG00000132535.17	1	COAD
ENSG00000160588.8.vs.ENSG00000160593.16	1	BLCA
ENSG00000226054.2.vs.ENSG00000159231.5	1	LIHC
ENSG00000038532.13.vs.ENSG00000280153.1	1	BLCA
ENSG00000106948.15.vs.ENSG00000095397.12	3	HNSC,BRCA,THCA
ENSG00000105711.9.vs.ENSG00000089351.13	1	LIHC
ENSG00000225950.6.vs.ENSG00000104848.1	2	LUSC,PRAD
ENSG00000248008.2.vs.ENSG00000278344.1	1	LIHC
ENSG00000175634.13.vs.ENSG00000172508.9	1	KIRP
ENSG00000102962.4.vs.ENSG00000006210.6	1	PRAD
ENSG00000103037.10.vs.ENSG00000103034.13	1	BRCA
ENSG00000113905.4.vs.ENSG00000090512.10	1	KIRP
ENSG00000223529.1.vs.ENSG00000114770.15	1	PRAD
ENSG00000188910.7.vs.ENSG00000187513.8	3	PRAD,KIRC,BRCA
ENSG00000111319.11.vs.ENSG00000067182.6	1	BLCA
ENSG00000142319.17.vs.ENSG00000279908.1	1	COAD
ENSG00000253730.1.vs.ENSG00000108819.10	1	BRCA
ENSG00000185624.13.vs.ENSG00000182676.4	1	HNSC
ENSG00000213999.14.vs.ENSG00000064545.13	1	STAD
ENSG00000136631.11.vs.ENSG00000023902.12	3	LIHC,STAD,UCEC
ENSG00000154328.14.vs.ENSG00000136574.16	1	LIHC
ENSG00000167657.10.vs.ENSG00000167658.14	1	COAD
ENSG00000137709.8.vs.ENSG00000184232.7	2	BRCA,THCA
ENSG00000279894.1.vs.ENSG00000196507.9	1	PRAD
ENSG00000257576.1.vs.ENSG00000076067.10	1	LIHC
ENSG00000133393.11.vs.ENSG00000133392.15	2	COAD,THCA
ENSG00000158050.4.vs.ENSG00000188886.3	1	BRCA
ENSG00000168894.8.vs.ENSG00000168899.4	1	BRCA
ENSG00000183624.12.vs.ENSG00000181789.13	2	LUSC,THCA
ENSG00000135249.6.vs.ENSG00000223886.3	1	LIHC
ENSG00000134780.8.vs.ENSG00000124920.12	1	STAD
ENSG00000166337.8.vs.ENSG00000166341.7	1	LUAD
ENSG00000099617.3.vs.ENSG00000228300.12	2	HNSC,UCEC
ENSG00000157399.13.vs.ENSG00000006756.14	2	HNSC,THCA
ENSG00000133055.7.vs.ENSG00000133048.11	1	LUSC
ENSG00000073008.13.vs.ENSG00000216588.7	1	HNSC
ENSG00000122971.7.vs.ENSG00000175970.8	1	HNSC
ENSG00000111181.11.vs.ENSG00000256540.1	1	BRCA
ENSG00000267291.1.vs.ENSG00000196218.10	1	LUAD
ENSG00000066336.10.vs.ENSG00000134571.9	1	BRCA
ENSG00000136856.16.vs.ENSG00000136895.17	1	KIRP
ENSG00000110497.13.vs.ENSG00000180720.7	1	HNSC
ENSG00000157315.4.vs.ENSG00000132604.9	1	STAD
ENSG00000105372.5.vs.ENSG00000105369.8	1	KIRP
ENSG00000103485.16.vs.ENSG00000197471.10	2	LIHC,HNSC
ENSG00000105655.17.vs.ENSG00000105656.11	2	LIHC,STAD
ENSG00000162576.15.vs.ENSG00000107404.16	1	LIHC
ENSG00000114491.12.vs.ENSG00000160145.14	1	STAD
ENSG00000167103.10.vs.ENSG00000167106.10	1	STAD
ENSG00000188157.12.vs.ENSG00000217801.8	1	THCA
ENSG00000277161.1.vs.ENSG00000278311.3	1	COAD
ENSG00000131759.16.vs.ENSG00000266208.1	1	BLCA
ENSG00000158516.10.vs.ENSG00000128510.9	1	COAD
ENSG00000090975.11.vs.ENSG00000150967.16	2	LIHC,PRAD
ENSG00000167107.11.vs.ENSG00000136444.8	1	KIRC
ENSG00000143549.18.vs.ENSG00000163263.6	1	LUAD
ENSG00000100479.11.vs.ENSG00000165506.13	1	UCEC
ENSG00000022556.14.vs.ENSG00000267265.4	1	LIHC
ENSG00000211678.2.vs.ENSG00000211679.2	1	COAD
ENSG00000159792.8.vs.ENSG00000263126.1	1	LUAD
ENSG00000280054.1.vs.ENSG00000111405.7	1	BLCA
ENSG00000116478.10.vs.ENSG00000182866.15	1	LIHC
ENSG00000222046.2.vs.ENSG00000160050.13	2	HNSC,UCEC
ENSG00000168758.9.vs.ENSG00000168754.12	1	LIHC
ENSG00000129354.10.vs.ENSG00000129347.18	1	LIHC
ENSG00000227036.5.vs.ENSG00000133195.10	1	BRCA
ENSG00000144827.7.vs.ENSG00000144824.18	1	LIHC
ENSG00000257337.5.vs.ENSG00000167778.7	1	STAD
ENSG00000132510.9.vs.ENSG00000182224.10	1	KIRP
ENSG00000102003.9.vs.ENSG00000102001.11	1	LUSC
ENSG00000268564.1.vs.ENSG00000105137.11	1	LIHC
ENSG00000270672.1.vs.ENSG00000211751.6	2	LIHC,LUSC
ENSG00000158869.9.vs.ENSG00000158882.11	1	STAD
ENSG00000244219.5.vs.ENSG00000197037.9	1	THCA
ENSG00000114646.8.vs.ENSG00000173473.9	1	PRAD
ENSG00000141068.12.vs.ENSG00000168961.15	1	LIHC
ENSG00000037280.14.vs.ENSG00000161055.3	1	BRCA
ENSG00000145861.7.vs.ENSG00000135083.13	1	PRAD
ENSG00000137709.8.vs.ENSG00000181264.7	1	KIRC
ENSG00000146729.8.vs.ENSG00000178665.13	1	BLCA
ENSG00000164675.9.vs.ENSG00000128609.13	1	LIHC
ENSG00000176160.8.vs.ENSG00000108389.8	1	COAD
ENSG00000157214.12.vs.ENSG00000105792.18	1	PRAD
ENSG00000100297.14.vs.ENSG00000100292.15	3	LUAD,COAD,KIRC
ENSG00000137337.13.vs.ENSG00000137404.13	1	LUSC
ENSG00000125787.10.vs.ENSG00000132670.19	2	LIHC,STAD
ENSG00000137135.16.vs.ENSG00000137078.7	1	LIHC
ENSG00000187244.9.vs.ENSG00000142273.9	1	STAD
ENSG00000205220.10.vs.ENSG00000124067.15	1	COAD
ENSG00000160051.10.vs.ENSG00000084652.14	1	COAD
ENSG00000203485.11.vs.ENSG00000185100.9	1	STAD
ENSG00000185513.13.vs.ENSG00000101049.13	1	LUAD
ENSG00000261884.2.vs.ENSG00000124067.15	2	LIHC,COAD
ENSG00000263639.4.vs.ENSG00000266412.4	1	STAD
ENSG00000257335.7.vs.ENSG00000257743.7	1	STAD
ENSG00000156875.12.vs.ENSG00000261254.2	1	PRAD
ENSG00000214135.7.vs.ENSG00000161267.10	1	KIRC
ENSG00000243323.4.vs.ENSG00000133067.16	1	HNSC
ENSG00000280486.1.vs.ENSG00000130005.10	1	COAD
ENSG00000169599.11.vs.ENSG00000198380.11	1	LIHC
ENSG00000125966.9.vs.ENSG00000229230.3	1	LIHC
ENSG00000100220.10.vs.ENSG00000205853.9	1	LIHC
ENSG00000144713.11.vs.ENSG00000272263.1	1	HNSC
ENSG00000224699.7.vs.ENSG00000143125.5	1	BRCA
ENSG00000185038.13.vs.ENSG00000242366.3	1	STAD
ENSG00000234961.1.vs.ENSG00000229124.5	1	PRAD
ENSG00000065029.13.vs.ENSG00000146197.8	2	STAD,LUSC
ENSG00000143368.9.vs.ENSG00000159164.8	1	LIHC
ENSG00000138604.8.vs.ENSG00000259504.2	1	STAD
ENSG00000211750.2.vs.ENSG00000270672.1	1	LUSC
ENSG00000162782.14.vs.ENSG00000227141.2	1	BLCA
ENSG00000175643.8.vs.ENSG00000263179.1	1	PRAD
ENSG00000167701.12.vs.ENSG00000167700.7	2	LIHC,BRCA
ENSG00000244151.1.vs.ENSG00000164897.11	1	LUAD
ENSG00000105219.7.vs.ENSG00000174521.7	1	BRCA
ENSG00000202441.2.vs.ENSG00000204228.3	1	LUAD
ENSG00000197291.7.vs.ENSG00000108799.11	1	STAD
ENSG00000138778.10.vs.ENSG00000164039.13	1	KIRC
ENSG00000272866.1.vs.ENSG00000107020.8	1	BRCA
ENSG00000160172.9.vs.ENSG00000273819.1	1	KIRC
ENSG00000117411.15.vs.ENSG00000132768.12	1	BLCA
ENSG00000185862.6.vs.ENSG00000126861.4	2	LUAD,COAD
ENSG00000125637.14.vs.ENSG00000189223.12	1	THCA
ENSG00000005189.18.vs.ENSG00000005187.10	1	BRCA
ENSG00000198824.5.vs.ENSG00000169062.13	1	THCA
ENSG00000167100.13.vs.ENSG00000250282.1	2	LIHC,THCA
ENSG00000117713.16.vs.ENSG00000060642.9	3	STAD,LUAD,BRCA
ENSG00000229953.1.vs.ENSG00000132688.10	2	COAD,HNSC
ENSG00000068308.12.vs.ENSG00000102096.9	1	STAD
ENSG00000138036.17.vs.ENSG00000152527.12	1	BRCA
ENSG00000228903.5.vs.ENSG00000214783.8	1	LIHC
ENSG00000105939.11.vs.ENSG00000146858.7	1	HNSC
ENSG00000184389.9.vs.ENSG00000134686.15	1	STAD
ENSG00000268869.4.vs.ENSG00000236698.1	1	HNSC
ENSG00000272810.1.vs.ENSG00000275714.1	1	THCA
ENSG00000204267.12.vs.ENSG00000241106.5	1	STAD
ENSG00000146576.11.vs.ENSG00000236609.3	1	STAD
ENSG00000109705.7.vs.ENSG00000246095.2	1	STAD
ENSG00000198556.12.vs.ENSG00000196652.10	1	LIHC
ENSG00000008056.11.vs.ENSG00000126759.11	1	UCEC
ENSG00000101222.11.vs.ENSG00000101220.16	2	STAD,BRCA
ENSG00000160271.13.vs.ENSG00000148288.10	2	LIHC,STAD
ENSG00000067840.11.vs.ENSG00000067829.17	2	LIHC,HNSC
ENSG00000131748.14.vs.ENSG00000141744.3	1	LIHC
ENSG00000232724.1.vs.ENSG00000170190.14	1	COAD
ENSG00000100385.12.vs.ENSG00000133466.12	2	COAD,BRCA
ENSG00000157873.16.vs.ENSG00000225931.3	1	BRCA
ENSG00000173914.10.vs.ENSG00000173898.10	1	PRAD
ENSG00000179855.5.vs.ENSG00000064961.17	1	KIRC
ENSG00000153283.11.vs.ENSG00000240891.5	1	HNSC
ENSG00000116396.12.vs.ENSG00000197106.6	2	LUAD,HNSC
ENSG00000257923.8.vs.ENSG00000160999.10	1	STAD
ENSG00000158859.9.vs.ENSG00000158850.13	1	STAD
ENSG00000105647.13.vs.ENSG00000216490.3	1	LUAD
ENSG00000172689.1.vs.ENSG00000166961.13	1	KIRC
ENSG00000081051.6.vs.ENSG00000163631.15	1	LUSC
ENSG00000181885.17.vs.ENSG00000175826.10	1	STAD
ENSG00000137825.9.vs.ENSG00000137815.13	2	LIHC,HNSC
ENSG00000159792.8.vs.ENSG00000038358.13	2	LUAD,PRAD
ENSG00000170236.13.vs.ENSG00000092439.12	1	THCA
ENSG00000132004.11.vs.ENSG00000105576.14	2	LIHC,KIRC
ENSG00000205220.10.vs.ENSG00000213398.6	1	COAD
ENSG00000226887.6.vs.ENSG00000248375.1	1	COAD
ENSG00000160345.11.vs.ENSG00000226706.1	3	LUAD,BLCA,KIRC
ENSG00000225313.4.vs.ENSG00000233246.1	1	LUAD
ENSG00000182379.9.vs.ENSG00000123384.12	4	STAD,PRAD,COAD,THCA
ENSG00000118473.20.vs.ENSG00000152760.8	1	LUAD
ENSG00000182218.8.vs.ENSG00000036530.7	1	LIHC
ENSG00000162757.4.vs.ENSG00000117595.9	1	UCEC
ENSG00000134884.12.vs.ENSG00000125266.6	1	STAD
ENSG00000236307.2.vs.ENSG00000153208.15	1	KIRC
ENSG00000099804.7.vs.ENSG00000197540.6	3	LIHC,LUSC,COAD
ENSG00000275691.1.vs.ENSG00000187193.8	1	THCA
ENSG00000184634.14.vs.ENSG00000196338.11	1	HNSC
ENSG00000169991.9.vs.ENSG00000159423.15	1	PRAD
ENSG00000143224.16.vs.ENSG00000143222.10	1	COAD
ENSG00000165816.11.vs.ENSG00000095627.8	1	COAD
ENSG00000244952.2.vs.ENSG00000232653.7	1	LUSC
ENSG00000279953.1.vs.ENSG00000278861.1	1	LUAD
ENSG00000278784.1.vs.ENSG00000100926.13	1	PRAD
ENSG00000149798.4.vs.ENSG00000014138.7	1	COAD
ENSG00000205116.3.vs.ENSG00000225905.1	1	STAD
ENSG00000160688.17.vs.ENSG00000160685.12	1	PRAD
ENSG00000276772.1.vs.ENSG00000128849.10	1	LIHC
ENSG00000197062.10.vs.ENSG00000189134.3	1	STAD
ENSG00000143061.16.vs.ENSG00000116815.14	1	PRAD
ENSG00000135605.11.vs.ENSG00000074966.9	1	KIRC
ENSG00000165912.14.vs.ENSG00000243802.2	1	HNSC
ENSG00000163961.4.vs.ENSG00000214097.4	2	STAD,PRAD
ENSG00000157873.16.vs.ENSG00000272449.1	1	KIRC
ENSG00000197191.4.vs.ENSG00000198569.8	1	LUSC
ENSG00000272779.1.vs.ENSG00000234630.1	2	LIHC,BRCA
ENSG00000160654.8.vs.ENSG00000110344.8	1	KIRC
ENSG00000182224.10.vs.ENSG00000167874.6	1	KIRP
ENSG00000168778.10.vs.ENSG00000185344.12	1	LIHC
ENSG00000108468.13.vs.ENSG00000278765.1	1	KIRC
ENSG00000265666.1.vs.ENSG00000278918.1	1	BLCA
ENSG00000243970.1.vs.ENSG00000090621.12	1	BRCA
ENSG00000105701.14.vs.ENSG00000105656.11	1	BLCA
ENSG00000129646.12.vs.ENSG00000161542.15	1	LIHC
ENSG00000092208.15.vs.ENSG00000258591.2	1	LIHC
ENSG00000116729.12.vs.ENSG00000229133.1	1	COAD
ENSG00000167800.9.vs.ENSG00000132744.6	1	HNSC
ENSG00000079616.11.vs.ENSG00000174992.7	1	LIHC
ENSG00000007312.11.vs.ENSG00000007314.10	1	LIHC
ENSG00000182308.6.vs.ENSG00000014824.12	1	LIHC
ENSG00000143862.6.vs.ENSG00000143851.14	3	LIHC,LUSC,BLCA
ENSG00000172508.9.vs.ENSG00000175463.10	1	BRCA
ENSG00000159625.13.vs.ENSG00000182885.15	2	LUAD,KIRP
ENSG00000167483.16.vs.ENSG00000130309.9	3	STAD,LUSC,HNSC
ENSG00000139914.6.vs.ENSG00000092010.13	2	LIHC,THCA
ENSG00000107331.15.vs.ENSG00000180549.7	1	HNSC
ENSG00000103043.13.vs.ENSG00000157423.16	1	STAD
ENSG00000186806.5.vs.ENSG00000105379.8	1	BRCA
ENSG00000129460.14.vs.ENSG00000157306.13	1	KIRP
ENSG00000086967.9.vs.ENSG00000269404.5	1	PRAD
ENSG00000160087.19.vs.ENSG00000184163.3	1	STAD
ENSG00000133250.12.vs.ENSG00000133246.10	1	LIHC
ENSG00000124067.15.vs.ENSG00000141096.4	1	STAD
ENSG00000162063.11.vs.ENSG00000238098.7	2	LUSC,THCA
ENSG00000092295.10.vs.ENSG00000092330.14	2	LUAD,PRAD
ENSG00000246334.2.vs.ENSG00000113758.12	1	BRCA
ENSG00000173692.11.vs.ENSG00000204128.5	1	HNSC
ENSG00000120318.14.vs.ENSG00000197948.9	1	PRAD
ENSG00000182885.15.vs.ENSG00000205336.10	1	LUSC
ENSG00000115590.12.vs.ENSG00000281162.1	1	LIHC
ENSG00000161999.10.vs.ENSG00000127585.10	1	LUSC
ENSG00000140983.12.vs.ENSG00000103269.12	1	LUSC
ENSG00000173156.5.vs.ENSG00000173227.12	1	BLCA
ENSG00000255045.1.vs.ENSG00000019102.10	1	KIRC
ENSG00000088247.14.vs.ENSG00000181240.12	1	STAD
ENSG00000137135.16.vs.ENSG00000198467.12	3	STAD,PRAD,COAD
ENSG00000152253.7.vs.ENSG00000073734.8	1	UCEC
ENSG00000267218.2.vs.ENSG00000186115.11	1	STAD
ENSG00000197768.9.vs.ENSG00000188986.4	1	UCEC
ENSG00000115275.10.vs.ENSG00000204822.6	1	BRCA
ENSG00000253771.4.vs.ENSG00000151849.13	1	LIHC
ENSG00000169607.11.vs.ENSG00000115008.5	2	COAD,KIRC
ENSG00000213190.3.vs.ENSG00000143443.9	1	COAD
ENSG00000242125.3.vs.ENSG00000204138.11	1	BLCA
ENSG00000187922.12.vs.ENSG00000233016.5	1	STAD
ENSG00000176092.12.vs.ENSG00000176083.16	2	COAD,HNSC
ENSG00000131183.9.vs.ENSG00000169220.16	1	BRCA
ENSG00000101294.15.vs.ENSG00000278276.1	1	KIRC
ENSG00000245532.5.vs.ENSG00000126391.12	2	LUSC,PRAD
ENSG00000272644.1.vs.ENSG00000280537.1	2	LUSC,KIRC
ENSG00000157020.16.vs.ENSG00000157087.15	1	KIRP
ENSG00000197557.6.vs.ENSG00000128655.15	1	LIHC
ENSG00000064687.11.vs.ENSG00000064666.13	1	STAD
ENSG00000186501.13.vs.ENSG00000142765.16	1	LIHC
ENSG00000154328.14.vs.ENSG00000255394.4	1	LIHC
ENSG00000198758.9.vs.ENSG00000134202.9	1	BLCA
ENSG00000005249.11.vs.ENSG00000105856.12	2	LIHC,KIRP
ENSG00000196923.12.vs.ENSG00000113758.12	2	STAD,BRCA
ENSG00000168703.5.vs.ENSG00000175121.10	1	KIRC
ENSG00000155066.14.vs.ENSG00000115041.11	1	KIRC
ENSG00000171456.15.vs.ENSG00000277692.1	1	PRAD
ENSG00000094631.17.vs.ENSG00000102145.12	1	PRAD
ENSG00000177791.11.vs.ENSG00000166317.10	3	LUSC,BRCA,THCA
ENSG00000262920.4.vs.ENSG00000262061.4	1	HNSC
ENSG00000280083.1.vs.ENSG00000138378.16	1	STAD
ENSG00000117682.15.vs.ENSG00000131914.9	1	BLCA
ENSG00000188158.13.vs.ENSG00000047634.13	1	COAD
ENSG00000174327.6.vs.ENSG00000161940.9	2	LIHC,KIRC
ENSG00000132832.8.vs.ENSG00000196839.11	1	KIRC
ENSG00000167524.13.vs.ENSG00000264608.1	1	THCA
ENSG00000147872.8.vs.ENSG00000147874.9	1	COAD
ENSG00000011451.16.vs.ENSG00000105122.11	3	LIHC,LUSC,HNSC
ENSG00000105219.7.vs.ENSG00000105221.15	1	BRCA
ENSG00000161642.16.vs.ENSG00000161638.9	2	LUSC,BRCA
ENSG00000167895.13.vs.ENSG00000187997.10	1	LIHC
ENSG00000178460.16.vs.ENSG00000104205.11	1	PRAD
ENSG00000124831.17.vs.ENSG00000227107.1	2	STAD,UCEC
ENSG00000065978.16.vs.ENSG00000171960.9	1	LUSC
ENSG00000271155.1.vs.ENSG00000271659.1	1	PRAD
ENSG00000060558.3.vs.ENSG00000125910.5	1	BRCA
ENSG00000126267.7.vs.ENSG00000105668.6	1	LIHC
ENSG00000171425.8.vs.ENSG00000063244.11	1	LIHC
ENSG00000141101.11.vs.ENSG00000260290.2	1	HNSC
ENSG00000272858.1.vs.ENSG00000280111.1	1	BRCA
ENSG00000198429.8.vs.ENSG00000171291.7	1	LUAD
ENSG00000253785.1.vs.ENSG00000113732.7	1	THCA
ENSG00000262362.1.vs.ENSG00000184697.6	1	STAD
ENSG00000093134.12.vs.ENSG00000112299.7	1	STAD
ENSG00000168273.6.vs.ENSG00000010327.9	1	LIHC
ENSG00000175189.3.vs.ENSG00000111087.8	2	LIHC,STAD
ENSG00000144579.6.vs.ENSG00000018280.15	1	LUSC
ENSG00000137880.5.vs.ENSG00000188277.9	1	LUSC
ENSG00000100280.15.vs.ENSG00000100276.9	1	LUAD
ENSG00000074660.14.vs.ENSG00000167703.13	1	LUAD
ENSG00000082781.10.vs.ENSG00000173702.6	1	LIHC
ENSG00000087088.18.vs.ENSG00000104808.6	1	BRCA
ENSG00000266028.6.vs.ENSG00000263528.6	1	PRAD
ENSG00000130307.10.vs.ENSG00000160113.5	1	KIRC
ENSG00000122884.11.vs.ENSG00000272630.1	2	LIHC,BRCA
ENSG00000178464.6.vs.ENSG00000188033.8	1	THCA
ENSG00000260698.1.vs.ENSG00000235021.1	1	LIHC
ENSG00000257950.3.vs.ENSG00000262903.1	1	KIRP
ENSG00000257838.4.vs.ENSG00000243716.9	1	LIHC
ENSG00000197226.11.vs.ENSG00000113269.12	1	KIRP
ENSG00000134285.9.vs.ENSG00000134287.8	1	KIRC
ENSG00000126062.3.vs.ENSG00000007402.10	1	UCEC
ENSG00000173451.5.vs.ENSG00000139291.12	1	LUSC
ENSG00000184254.15.vs.ENSG00000259604.4	1	PRAD
ENSG00000162066.13.vs.ENSG00000279520.1	1	LIHC
ENSG00000188229.5.vs.ENSG00000197768.9	1	UCEC
ENSG00000198488.9.vs.ENSG00000078124.10	1	HNSC
ENSG00000138271.5.vs.ENSG00000181631.6	3	COAD,HNSC,BRCA
ENSG00000118292.7.vs.ENSG00000159208.14	1	LIHC
ENSG00000100034.12.vs.ENSG00000100038.18	1	LIHC
ENSG00000103657.12.vs.ENSG00000259248.4	1	HNSC
ENSG00000221953.5.vs.ENSG00000196418.11	1	PRAD
ENSG00000163159.10.vs.ENSG00000163155.10	1	KIRP
ENSG00000167757.12.vs.ENSG00000186474.14	1	PRAD
ENSG00000006283.16.vs.ENSG00000108846.14	1	PRAD
ENSG00000253636.1.vs.ENSG00000147601.12	1	LIHC
ENSG00000144045.12.vs.ENSG00000115318.10	2	LIHC,LUAD
ENSG00000140553.15.vs.ENSG00000196547.13	1	LIHC
ENSG00000236830.5.vs.ENSG00000230212.5	1	COAD
ENSG00000183019.6.vs.ENSG00000181029.8	1	KIRC
ENSG00000089169.13.vs.ENSG00000089127.11	1	KIRC
ENSG00000257542.4.vs.ENSG00000123395.13	1	KIRP
ENSG00000225032.4.vs.ENSG00000136877.13	1	LUSC
ENSG00000232613.5.vs.ENSG00000011523.12	1	LUAD
ENSG00000126267.7.vs.ENSG00000105672.13	1	COAD
ENSG00000168309.15.vs.ENSG00000198643.5	2	LUSC,PRAD
ENSG00000162650.14.vs.ENSG00000174151.13	2	LIHC,LUAD
ENSG00000261884.2.vs.ENSG00000213398.6	1	COAD
ENSG00000279026.1.vs.ENSG00000177465.4	1	THCA
ENSG00000107281.8.vs.ENSG00000054179.10	1	PRAD
ENSG00000234776.3.vs.ENSG00000121680.14	1	STAD
ENSG00000177602.5.vs.ENSG00000262692.1	1	KIRC
ENSG00000070444.13.vs.ENSG00000127804.11	1	LIHC
ENSG00000175414.6.vs.ENSG00000251414.1	1	LIHC
ENSG00000156973.12.vs.ENSG00000237641.1	1	KIRP
ENSG00000205336.10.vs.ENSG00000260828.1	1	BLCA
ENSG00000097007.16.vs.ENSG00000130713.14	1	KIRC
ENSG00000233985.1.vs.ENSG00000203740.3	1	BLCA
ENSG00000122375.10.vs.ENSG00000122367.18	1	HNSC
ENSG00000174343.5.vs.ENSG00000249241.1	1	LUAD
ENSG00000105409.14.vs.ENSG00000105404.9	2	PRAD,BRCA
ENSG00000188825.12.vs.ENSG00000279602.1	2	LIHC,PRAD
ENSG00000272724.1.vs.ENSG00000123395.13	1	KIRP
ENSG00000105767.2.vs.ENSG00000011422.10	2	STAD,BRCA
ENSG00000225950.6.vs.ENSG00000269706.1	1	BLCA
ENSG00000115649.14.vs.ENSG00000213901.9	1	LUSC
ENSG00000103351.11.vs.ENSG00000262312.2	2	LUAD,BRCA
ENSG00000089280.17.vs.ENSG00000260060.1	1	KIRC
ENSG00000124313.11.vs.ENSG00000126012.10	1	LIHC
ENSG00000176723.8.vs.ENSG00000261474.1	1	HNSC
ENSG00000138641.14.vs.ENSG00000248019.2	1	COAD
ENSG00000132881.10.vs.ENSG00000233929.1	2	LIHC,LUAD
ENSG00000112031.14.vs.ENSG00000091844.6	2	HNSC,KIRC
ENSG00000171135.12.vs.ENSG00000163701.17	1	STAD
ENSG00000233438.1.vs.ENSG00000221843.3	1	LIHC
ENSG00000235663.1.vs.ENSG00000252743.1	3	KIRP,BRCA,UCEC
ENSG00000166908.16.vs.ENSG00000240771.5	1	PRAD
ENSG00000167656.4.vs.ENSG00000180155.17	1	PRAD
ENSG00000173157.15.vs.ENSG00000241251.2	1	COAD
ENSG00000167711.12.vs.ENSG00000132386.9	1	STAD
ENSG00000119777.17.vs.ENSG00000084764.9	1	PRAD
ENSG00000215785.2.vs.ENSG00000175262.13	1	PRAD
ENSG00000136908.16.vs.ENSG00000167103.10	1	STAD
ENSG00000186998.14.vs.ENSG00000237015.1	1	BRCA
ENSG00000225857.4.vs.ENSG00000135835.9	1	STAD
ENSG00000136883.11.vs.ENSG00000106927.10	1	LIHC
ENSG00000102100.13.vs.ENSG00000102096.9	1	STAD
ENSG00000162571.12.vs.ENSG00000207607.2	1	LUAD
ENSG00000177842.10.vs.ENSG00000172888.10	1	LUSC
ENSG00000109089.7.vs.ENSG00000167862.8	1	HNSC
ENSG00000164081.11.vs.ENSG00000164082.13	1	LUAD
ENSG00000272172.1.vs.ENSG00000253716.4	1	UCEC
ENSG00000107874.9.vs.ENSG00000059915.15	1	BRCA
ENSG00000164591.12.vs.ENSG00000171992.11	1	KIRC
ENSG00000090006.16.vs.ENSG00000160410.13	1	PRAD
ENSG00000010379.14.vs.ENSG00000111181.11	1	BRCA
ENSG00000260903.2.vs.ENSG00000101331.14	1	STAD
ENSG00000243678.10.vs.ENSG00000239672.6	1	PRAD
ENSG00000166557.11.vs.ENSG00000169330.7	1	LIHC
ENSG00000167967.14.vs.ENSG00000261663.1	1	KIRC
ENSG00000258745.1.vs.ENSG00000131969.13	1	LUSC
ENSG00000167085.10.vs.ENSG00000229944.3	1	LIHC
ENSG00000278195.1.vs.ENSG00000133466.12	2	STAD,BRCA
ENSG00000127540.10.vs.ENSG00000071564.13	1	HNSC
ENSG00000196917.5.vs.ENSG00000255398.2	1	HNSC
ENSG00000006607.12.vs.ENSG00000168385.16	1	LUAD
ENSG00000083223.16.vs.ENSG00000135070.12	1	LIHC
ENSG00000159173.17.vs.ENSG00000159166.12	1	PRAD
ENSG00000241399.5.vs.ENSG00000054219.10	2	LUSC,PRAD
ENSG00000166343.8.vs.ENSG00000138279.14	1	BRCA
ENSG00000204323.5.vs.ENSG00000266714.5	1	STAD
ENSG00000087111.19.vs.ENSG00000109107.12	1	LIHC
ENSG00000110719.8.vs.ENSG00000006534.14	2	LIHC,LUAD
ENSG00000186918.12.vs.ENSG00000253690.1	1	UCEC
ENSG00000126698.9.vs.ENSG00000169403.10	2	LIHC,KIRP
ENSG00000132510.9.vs.ENSG00000183914.13	2	LUAD,BRCA
ENSG00000115649.14.vs.ENSG00000280537.1	1	LUSC
ENSG00000167968.11.vs.ENSG00000261663.1	1	KIRC
ENSG00000174562.12.vs.ENSG00000167748.9	1	PRAD
ENSG00000266094.5.vs.ENSG00000261000.1	1	BRCA
ENSG00000142303.12.vs.ENSG00000142347.15	1	THCA
ENSG00000161956.11.vs.ENSG00000129226.12	1	STAD
ENSG00000186111.7.vs.ENSG00000105298.12	1	KIRC
ENSG00000105270.13.vs.ENSG00000181392.13	2	STAD,KIRC
ENSG00000104524.12.vs.ENSG00000104522.14	1	LIHC
ENSG00000113812.12.vs.ENSG00000271976.1	1	LIHC
ENSG00000204618.7.vs.ENSG00000204623.7	1	LUSC
ENSG00000270074.1.vs.ENSG00000250794.2	1	LUAD
ENSG00000171747.7.vs.ENSG00000104823.7	1	LIHC
ENSG00000130598.14.vs.ENSG00000149043.15	2	PRAD,HNSC
ENSG00000105852.9.vs.ENSG00000105854.11	1	STAD
ENSG00000128294.14.vs.ENSG00000100122.5	1	BRCA
ENSG00000135838.12.vs.ENSG00000135829.15	1	KIRC
ENSG00000196503.2.vs.ENSG00000174780.14	1	LUAD
ENSG00000162931.10.vs.ENSG00000168148.3	1	STAD
ENSG00000234627.3.vs.ENSG00000240654.5	1	STAD
ENSG00000164663.12.vs.ENSG00000137218.9	1	THCA
ENSG00000092929.10.vs.ENSG00000266980.1	1	LIHC
ENSG00000018408.13.vs.ENSG00000114744.7	1	STAD
ENSG00000253250.2.vs.ENSG00000155099.6	1	HNSC
ENSG00000204396.9.vs.ENSG00000252743.1	3	KIRP,BRCA,UCEC
ENSG00000243064.7.vs.ENSG00000185272.12	1	STAD
ENSG00000131153.7.vs.ENSG00000275393.1	1	COAD
ENSG00000228925.1.vs.ENSG00000068724.14	1	LIHC
ENSG00000188486.3.vs.ENSG00000172269.15	1	KIRC
ENSG00000124391.4.vs.ENSG00000158545.14	2	STAD,BRCA
ENSG00000183682.7.vs.ENSG00000127603.22	1	LIHC
ENSG00000267218.2.vs.ENSG00000267056.2	1	STAD
ENSG00000153404.12.vs.ENSG00000261434.1	1	KIRC
ENSG00000169857.6.vs.ENSG00000259408.2	1	STAD
ENSG00000033867.15.vs.ENSG00000163491.15	1	KIRP
ENSG00000127578.6.vs.ENSG00000102854.13	1	LUAD
ENSG00000206561.11.vs.ENSG00000206562.10	1	HNSC
ENSG00000089692.7.vs.ENSG00000159335.14	1	BRCA
ENSG00000147604.12.vs.ENSG00000250295.5	1	LIHC
ENSG00000117758.12.vs.ENSG00000117751.16	1	BLCA
ENSG00000160182.2.vs.ENSG00000160183.12	1	BLCA
ENSG00000161992.5.vs.ENSG00000007541.13	1	STAD
ENSG00000237276.7.vs.ENSG00000132881.10	1	PRAD
ENSG00000158710.13.vs.ENSG00000085552.15	1	LUSC
ENSG00000131188.10.vs.ENSG00000198055.9	1	LUAD
ENSG00000168439.15.vs.ENSG00000149781.11	1	BLCA
ENSG00000108405.3.vs.ENSG00000074370.16	1	LUAD
ENSG00000163382.10.vs.ENSG00000187862.10	2	PRAD,KIRC
ENSG00000105552.13.vs.ENSG00000087076.7	1	PRAD
ENSG00000131469.11.vs.ENSG00000068079.6	1	HNSC
ENSG00000170175.9.vs.ENSG00000181284.2	1	PRAD
ENSG00000105699.15.vs.ENSG00000105698.14	1	PRAD
ENSG00000134830.5.vs.ENSG00000134815.17	1	PRAD
ENSG00000278535.3.vs.ENSG00000278311.3	1	COAD
ENSG00000105402.6.vs.ENSG00000118156.11	2	LIHC,LUSC
ENSG00000214578.5.vs.ENSG00000108799.11	1	STAD
ENSG00000163501.6.vs.ENSG00000272644.1	1	KIRC
ENSG00000106153.12.vs.ENSG00000185290.3	1	STAD
ENSG00000175309.13.vs.ENSG00000050767.14	1	HNSC
ENSG00000149639.13.vs.ENSG00000149636.14	1	PRAD
ENSG00000232869.2.vs.ENSG00000204983.11	1	LUSC
ENSG00000128944.12.vs.ENSG00000140323.5	1	STAD
ENSG00000132670.19.vs.ENSG00000125901.5	1	LIHC
ENSG00000144827.7.vs.ENSG00000144834.11	1	BRCA
ENSG00000228013.1.vs.ENSG00000228264.1	1	LIHC
ENSG00000105369.8.vs.ENSG00000276926.1	1	LUSC
ENSG00000115594.10.vs.ENSG00000115598.8	1	LUAD
ENSG00000164434.10.vs.ENSG00000172594.11	1	PRAD
ENSG00000273650.1.vs.ENSG00000108799.11	1	STAD
ENSG00000187800.12.vs.ENSG00000160838.12	1	PRAD
ENSG00000184083.10.vs.ENSG00000196632.9	1	HNSC
ENSG00000205352.9.vs.ENSG00000197111.14	2	COAD,HNSC
ENSG00000185038.13.vs.ENSG00000242515.4	1	LUAD
ENSG00000105131.6.vs.ENSG00000141867.16	1	LIHC
ENSG00000213085.8.vs.ENSG00000243284.1	1	PRAD
ENSG00000099998.16.vs.ENSG00000230712.2	1	THCA
ENSG00000211676.2.vs.ENSG00000211679.2	1	COAD
ENSG00000172757.11.vs.ENSG00000172638.11	1	HNSC
ENSG00000176054.6.vs.ENSG00000156253.5	1	PRAD
ENSG00000255045.1.vs.ENSG00000149564.10	1	PRAD
ENSG00000105085.9.vs.ENSG00000269044.2	1	PRAD
ENSG00000108654.10.vs.ENSG00000256525.5	1	PRAD
ENSG00000279582.1.vs.ENSG00000175329.11	1	BLCA
ENSG00000230082.1.vs.ENSG00000163703.16	1	LUAD
ENSG00000107438.7.vs.ENSG00000234026.1	1	STAD
ENSG00000100097.10.vs.ENSG00000100092.19	2	LUAD,PRAD
ENSG00000086730.15.vs.ENSG00000207741.1	1	BRCA
ENSG00000150768.14.vs.ENSG00000150764.12	1	HNSC
ENSG00000243554.1.vs.ENSG00000183444.10	1	PRAD
ENSG00000237118.2.vs.ENSG00000269843.1	1	STAD
ENSG00000158428.3.vs.ENSG00000230580.1	1	BRCA
ENSG00000131203.11.vs.ENSG00000188676.12	1	PRAD
ENSG00000120937.8.vs.ENSG00000175206.9	1	LIHC
ENSG00000169857.6.vs.ENSG00000259287.2	1	STAD
ENSG00000226499.1.vs.ENSG00000070785.15	1	LUAD
ENSG00000280143.1.vs.ENSG00000149577.14	1	STAD
ENSG00000277957.1.vs.ENSG00000239697.9	1	STAD
ENSG00000166986.11.vs.ENSG00000111087.8	1	LIHC
ENSG00000142684.7.vs.ENSG00000197245.4	1	LIHC
ENSG00000156304.13.vs.ENSG00000273271.1	1	THCA
ENSG00000066117.13.vs.ENSG00000167588.11	1	PRAD
ENSG00000168758.9.vs.ENSG00000213337.7	1	COAD
ENSG00000272834.1.vs.ENSG00000100359.19	1	LUAD
ENSG00000136114.14.vs.ENSG00000136100.11	1	BRCA
ENSG00000116014.8.vs.ENSG00000116017.9	1	LIHC
ENSG00000130643.7.vs.ENSG00000230306.1	1	LIHC
ENSG00000089639.9.vs.ENSG00000105726.15	1	LIHC
ENSG00000180535.3.vs.ENSG00000164715.5	3	LIHC,STAD,HNSC
ENSG00000225950.6.vs.ENSG00000213030.5	1	BLCA
ENSG00000099985.3.vs.ENSG00000279699.1	1	STAD
ENSG00000197558.10.vs.ENSG00000106479.9	1	STAD
ENSG00000205213.12.vs.ENSG00000109881.15	1	THCA
ENSG00000012061.14.vs.ENSG00000125744.10	2	LIHC,BRCA
ENSG00000236850.4.vs.ENSG00000234630.1	1	BRCA
ENSG00000149260.13.vs.ENSG00000137474.18	1	THCA
ENSG00000259840.1.vs.ENSG00000127585.10	1	COAD
ENSG00000129451.10.vs.ENSG00000186474.14	1	PRAD
ENSG00000111716.11.vs.ENSG00000121361.3	1	PRAD
ENSG00000245750.6.vs.ENSG00000137818.10	2	LIHC,BRCA
ENSG00000069956.10.vs.ENSG00000138594.11	1	LIHC
ENSG00000101445.8.vs.ENSG00000101447.12	1	KIRC
ENSG00000139626.14.vs.ENSG00000172819.15	1	BRCA
ENSG00000160703.14.vs.ENSG00000172367.14	1	HNSC
ENSG00000130643.7.vs.ENSG00000226699.1	1	LIHC
ENSG00000148362.9.vs.ENSG00000107317.10	2	STAD,KIRC
ENSG00000105755.6.vs.ENSG00000176531.9	2	LIHC,STAD
ENSG00000279320.1.vs.ENSG00000163746.10	1	HNSC
ENSG00000159958.4.vs.ENSG00000234965.2	1	PRAD
ENSG00000101104.11.vs.ENSG00000166913.11	2	STAD,KIRP
ENSG00000167680.14.vs.ENSG00000171236.9	1	PRAD
ENSG00000235908.1.vs.ENSG00000233276.3	1	STAD
ENSG00000267218.2.vs.ENSG00000171903.15	1	STAD
ENSG00000198954.5.vs.ENSG00000165732.11	1	LIHC
ENSG00000249007.1.vs.ENSG00000176393.9	1	BRCA
ENSG00000104221.11.vs.ENSG00000156675.14	1	LIHC
ENSG00000175592.7.vs.ENSG00000172500.11	1	PRAD
ENSG00000235077.1.vs.ENSG00000188186.9	1	LIHC
ENSG00000204427.10.vs.ENSG00000204428.11	1	BRCA
ENSG00000116898.10.vs.ENSG00000119535.16	1	BLCA
ENSG00000272669.1.vs.ENSG00000100226.14	1	LUAD
ENSG00000141161.10.vs.ENSG00000267744.1	1	LUSC
ENSG00000173726.9.vs.ENSG00000188739.13	1	THCA
ENSG00000235052.1.vs.ENSG00000117318.8	1	THCA
ENSG00000273297.1.vs.ENSG00000085662.12	1	STAD
ENSG00000137875.4.vs.ENSG00000259712.1	1	LUAD
ENSG00000103264.14.vs.ENSG00000261592.1	1	LUAD
ENSG00000244701.1.vs.ENSG00000270157.1	1	LIHC
ENSG00000170515.12.vs.ENSG00000229117.7	2	PRAD,KIRP
ENSG00000100714.14.vs.ENSG00000179841.8	1	BRCA
ENSG00000165055.14.vs.ENSG00000240758.2	1	LUAD
ENSG00000276995.1.vs.ENSG00000221995.5	1	LIHC
ENSG00000102858.11.vs.ENSG00000168101.13	1	STAD
ENSG00000102384.12.vs.ENSG00000126950.7	1	HNSC
ENSG00000183763.7.vs.ENSG00000164076.15	1	STAD
ENSG00000111077.16.vs.ENSG00000063046.16	1	LIHC
ENSG00000261286.1.vs.ENSG00000140950.14	1	LUSC
ENSG00000255197.4.vs.ENSG00000165916.7	1	COAD

## Sheet: random-up_vs_up+down_vs_down
random_cycle	gene pair	number of TCGA datasets	TCGA datasets
1	ENSG00000105717.12.vs.ENSG00000166750.8	1	PRAD
1	ENSG00000109943.7.vs.ENSG00000271151.1	2	LUSC,KIRC
1	ENSG00000255823.2.vs.ENSG00000146833.14	1	STAD
1	ENSG00000203772.7.vs.ENSG00000091536.15	1	LIHC
1	ENSG00000236383.6.vs.ENSG00000123815.10	1	BRCA
1	ENSG00000198759.10.vs.ENSG00000155846.15	1	THCA
1	ENSG00000143369.13.vs.ENSG00000119487.15	3	STAD,BLCA,HNSC
1	ENSG00000081760.15.vs.ENSG00000175931.11	1	STAD
1	ENSG00000205231.1.vs.ENSG00000166340.13	2	PRAD,BLCA
1	ENSG00000159579.12.vs.ENSG00000197150.11	1	STAD
1	ENSG00000133874.1.vs.ENSG00000105771.12	2	LUAD,UCEC
1	ENSG00000125354.21.vs.ENSG00000181800.5	2	STAD,LUAD
1	ENSG00000137814.8.vs.ENSG00000137478.13	1	KIRC
1	ENSG00000272100.1.vs.ENSG00000141994.14	1	LIHC
1	ENSG00000169992.8.vs.ENSG00000186652.8	2	LUAD,LUSC
1	ENSG00000271858.4.vs.ENSG00000151136.13	1	HNSC
1	ENSG00000227199.1.vs.ENSG00000132005.7	1	PRAD
1	ENSG00000120686.10.vs.ENSG00000172232.8	2	LIHC,KIRC
1	ENSG00000164118.11.vs.ENSG00000160183.12	1	KIRP
1	ENSG00000258789.1.vs.ENSG00000258839.2	1	HNSC
1	ENSG00000152413.13.vs.ENSG00000233110.1	1	KIRC
1	ENSG00000273265.1.vs.ENSG00000120063.8	2	LIHC,BRCA
1	ENSG00000143119.11.vs.ENSG00000226800.5	2	LUAD,BLCA
1	ENSG00000188581.8.vs.ENSG00000104142.9	1	KIRP
1	ENSG00000154451.13.vs.ENSG00000164308.15	1	STAD
1	ENSG00000174231.15.vs.ENSG00000251655.5	2	STAD,COAD
1	ENSG00000154914.15.vs.ENSG00000077721.14	2	COAD,BRCA
1	ENSG00000189283.8.vs.ENSG00000179299.15	1	BRCA
1	ENSG00000108799.11.vs.ENSG00000134817.10	3	LIHC,KIRC,THCA
1	ENSG00000116396.12.vs.ENSG00000130414.10	1	LIHC
1	ENSG00000186472.18.vs.ENSG00000150782.10	2	LUAD,BRCA
1	ENSG00000248590.2.vs.ENSG00000166682.9	1	LIHC
1	ENSG00000271880.1.vs.ENSG00000198898.11	1	LUAD
1	ENSG00000143624.12.vs.ENSG00000165633.11	1	LUAD
1	ENSG00000141699.9.vs.ENSG00000106263.16	1	LUAD
1	ENSG00000115523.15.vs.ENSG00000117724.11	1	HNSC
1	ENSG00000213654.8.vs.ENSG00000090615.11	1	BLCA
1	ENSG00000259107.1.vs.ENSG00000154263.16	1	HNSC
1	ENSG00000169231.12.vs.ENSG00000204789.4	1	LIHC
1	ENSG00000261713.5.vs.ENSG00000227953.5	1	BRCA
1	ENSG00000198826.9.vs.ENSG00000153015.14	1	LUSC
1	ENSG00000115091.10.vs.ENSG00000049167.12	1	STAD
1	ENSG00000113712.15.vs.ENSG00000131100.11	1	COAD
1	ENSG00000185332.5.vs.ENSG00000139874.5	2	PRAD,BRCA
1	ENSG00000119522.14.vs.ENSG00000261366.1	3	LIHC,LUSC,BLCA
1	ENSG00000164400.5.vs.ENSG00000266708.1	1	LUAD
1	ENSG00000118257.15.vs.ENSG00000259673.4	3	LIHC,KIRC,BRCA
1	ENSG00000119285.9.vs.ENSG00000057149.13	1	PRAD
1	ENSG00000278002.1.vs.ENSG00000149596.6	1	BRCA
1	ENSG00000260903.2.vs.ENSG00000156920.9	1	STAD
1	ENSG00000130829.16.vs.ENSG00000010671.14	2	STAD,BLCA
1	ENSG00000279103.1.vs.ENSG00000239887.4	2	LIHC,PRAD
1	ENSG00000161082.11.vs.ENSG00000274447.1	2	STAD,BRCA
1	ENSG00000158882.11.vs.ENSG00000113407.12	1	LIHC
1	ENSG00000197635.8.vs.ENSG00000160410.13	1	PRAD
1	ENSG00000095539.14.vs.ENSG00000273891.1	2	LUAD,BRCA
1	ENSG00000260404.2.vs.ENSG00000179314.12	1	KIRC
1	ENSG00000233251.6.vs.ENSG00000124743.5	1	THCA
1	ENSG00000268119.4.vs.ENSG00000108641.13	2	STAD,BRCA
1	ENSG00000225285.1.vs.ENSG00000223760.4	1	HNSC
1	ENSG00000143851.14.vs.ENSG00000196312.10	1	LUSC
1	ENSG00000154975.12.vs.ENSG00000204978.2	1	KIRC
1	ENSG00000230798.4.vs.ENSG00000268279.3	1	LUAD
1	ENSG00000169762.15.vs.ENSG00000124205.14	1	HNSC
1	ENSG00000116717.10.vs.ENSG00000205488.7	1	BRCA
1	ENSG00000088247.14.vs.ENSG00000069399.11	2	LIHC,KIRC
1	ENSG00000157077.13.vs.ENSG00000010319.5	2	PRAD,BRCA
1	ENSG00000111641.9.vs.ENSG00000133131.13	2	BLCA,HNSC
1	ENSG00000141298.16.vs.ENSG00000046651.13	1	HNSC
1	ENSG00000145817.15.vs.ENSG00000081087.13	1	LUAD
1	ENSG00000246662.5.vs.ENSG00000165462.5	1	UCEC
1	ENSG00000271730.1.vs.ENSG00000119725.16	1	LIHC
1	ENSG00000271218.1.vs.ENSG00000196569.10	1	THCA
1	ENSG00000121335.11.vs.ENSG00000267801.1	1	COAD
1	ENSG00000167971.15.vs.ENSG00000118849.8	2	LUAD,HNSC
1	ENSG00000243772.5.vs.ENSG00000230266.1	1	BRCA
1	ENSG00000130396.19.vs.ENSG00000068438.13	1	LIHC
1	ENSG00000169758.11.vs.ENSG00000142661.17	1	COAD
1	ENSG00000169330.7.vs.ENSG00000170275.13	2	LUSC,HNSC
1	ENSG00000143179.11.vs.ENSG00000040341.16	1	LUAD
1	ENSG00000271092.4.vs.ENSG00000137764.18	1	PRAD
1	ENSG00000280435.1.vs.ENSG00000092200.11	1	STAD
1	ENSG00000127824.12.vs.ENSG00000106236.3	1	STAD
1	ENSG00000115271.9.vs.ENSG00000183354.10	1	BRCA
1	ENSG00000127084.16.vs.ENSG00000234477.1	1	COAD
1	ENSG00000254470.2.vs.ENSG00000177291.3	1	THCA
1	ENSG00000095383.18.vs.ENSG00000160752.13	1	HNSC
1	ENSG00000111906.16.vs.ENSG00000188312.12	1	LIHC
1	ENSG00000163633.9.vs.ENSG00000163218.13	1	BRCA
1	ENSG00000176871.7.vs.ENSG00000109511.9	2	PRAD,BLCA
1	ENSG00000161653.9.vs.ENSG00000198879.10	1	LIHC
1	ENSG00000121904.16.vs.ENSG00000102003.9	1	PRAD
1	ENSG00000161654.8.vs.ENSG00000176393.9	1	BLCA
1	ENSG00000114784.3.vs.ENSG00000265489.1	1	BLCA
1	ENSG00000203872.6.vs.ENSG00000159314.10	1	PRAD
1	ENSG00000004961.13.vs.ENSG00000280240.1	1	STAD
1	ENSG00000090512.10.vs.ENSG00000162078.10	2	LUSC,KIRP
1	ENSG00000071564.13.vs.ENSG00000178623.10	1	BLCA
1	ENSG00000082556.9.vs.ENSG00000070759.15	1	STAD
1	ENSG00000080819.5.vs.ENSG00000010292.11	1	KIRC
1	ENSG00000273890.1.vs.ENSG00000120725.11	1	BRCA
1	ENSG00000278834.1.vs.ENSG00000071859.13	2	STAD,BRCA
1	ENSG00000186907.6.vs.ENSG00000226445.1	4	COAD,HNSC,BRCA,THCA
1	ENSG00000267575.5.vs.ENSG00000179761.10	1	UCEC
1	ENSG00000213337.7.vs.ENSG00000174238.13	3	PRAD,COAD,HNSC
1	ENSG00000246273.5.vs.ENSG00000004948.12	1	LUAD
1	ENSG00000198736.10.vs.ENSG00000103187.7	1	UCEC
1	ENSG00000244184.1.vs.ENSG00000143882.8	1	STAD
1	ENSG00000178171.9.vs.ENSG00000231365.4	1	LUAD
1	ENSG00000182463.14.vs.ENSG00000205795.4	1	HNSC
1	ENSG00000070831.14.vs.ENSG00000047188.14	2	LUAD,BRCA
1	ENSG00000249684.4.vs.ENSG00000164118.11	1	BRCA
1	ENSG00000100583.4.vs.ENSG00000145284.10	3	STAD,LUSC,PRAD
1	ENSG00000272871.1.vs.ENSG00000254681.5	1	LIHC
1	ENSG00000267288.2.vs.ENSG00000135736.5	2	LIHC,KIRC
1	ENSG00000113083.11.vs.ENSG00000263938.1	1	UCEC
1	ENSG00000114631.10.vs.ENSG00000254165.1	1	BRCA
1	ENSG00000105854.11.vs.ENSG00000177542.9	1	BLCA
1	ENSG00000108559.10.vs.ENSG00000115596.3	1	STAD
1	ENSG00000115042.8.vs.ENSG00000178694.8	1	COAD
1	ENSG00000253582.1.vs.ENSG00000162897.13	1	LUAD
1	ENSG00000186063.11.vs.ENSG00000101333.15	2	STAD,BLCA
1	ENSG00000101365.19.vs.ENSG00000113597.16	2	STAD,LUAD
1	ENSG00000158352.14.vs.ENSG00000178033.5	5	LIHC,STAD,PRAD,COAD,THCA
1	ENSG00000186838.12.vs.ENSG00000183784.6	2	STAD,PRAD
1	ENSG00000157107.12.vs.ENSG00000183929.7	1	STAD
1	ENSG00000275700.3.vs.ENSG00000196262.12	1	STAD
1	ENSG00000135205.13.vs.ENSG00000132821.10	2	LUAD,HNSC
1	ENSG00000112981.4.vs.ENSG00000255408.3	1	BRCA
1	ENSG00000144827.7.vs.ENSG00000253567.1	1	STAD
1	ENSG00000255150.1.vs.ENSG00000215045.7	1	KIRC
1	ENSG00000137270.10.vs.ENSG00000050165.16	1	LIHC
1	ENSG00000198300.11.vs.ENSG00000198739.9	1	STAD
1	ENSG00000188243.11.vs.ENSG00000130638.14	1	BRCA
1	ENSG00000113763.9.vs.ENSG00000132915.9	1	THCA
1	ENSG00000101190.11.vs.ENSG00000112855.13	1	LUAD
1	ENSG00000131061.12.vs.ENSG00000259342.1	1	BLCA
1	ENSG00000166743.8.vs.ENSG00000164091.10	1	BRCA
1	ENSG00000274560.1.vs.ENSG00000221944.4	1	THCA
1	ENSG00000253671.1.vs.ENSG00000117625.12	1	STAD
1	ENSG00000105974.10.vs.ENSG00000105640.11	4	LUSC,HNSC,KIRP,THCA
1	ENSG00000181873.11.vs.ENSG00000151135.8	1	BLCA
1	ENSG00000156395.11.vs.ENSG00000127249.13	1	HNSC
1	ENSG00000175294.5.vs.ENSG00000273000.4	2	LUSC,BRCA
1	ENSG00000151320.9.vs.ENSG00000256053.6	1	LUAD
1	ENSG00000241644.2.vs.ENSG00000232909.1	1	PRAD
1	ENSG00000101134.10.vs.ENSG00000153179.10	2	STAD,BLCA
1	ENSG00000256552.2.vs.ENSG00000157514.15	1	LUAD
1	ENSG00000237200.1.vs.ENSG00000275552.1	1	STAD
1	ENSG00000103356.14.vs.ENSG00000226419.5	1	BRCA
1	ENSG00000136732.13.vs.ENSG00000203497.2	1	LUSC
1	ENSG00000227698.1.vs.ENSG00000223745.6	1	KIRP
1	ENSG00000196976.6.vs.ENSG00000050344.8	2	STAD,HNSC
1	ENSG00000168703.5.vs.ENSG00000228261.1	1	BLCA
1	ENSG00000167100.13.vs.ENSG00000259709.1	1	KIRC
1	ENSG00000196659.9.vs.ENSG00000227598.1	1	KIRC
1	ENSG00000279372.1.vs.ENSG00000165338.15	2	LIHC,PRAD
1	ENSG00000151617.14.vs.ENSG00000170558.7	3	LIHC,PRAD,THCA
1	ENSG00000272541.1.vs.ENSG00000183722.7	1	PRAD
1	ENSG00000114638.6.vs.ENSG00000125510.14	1	STAD
1	ENSG00000179362.13.vs.ENSG00000103769.8	1	BLCA
1	ENSG00000065518.7.vs.ENSG00000109576.12	3	PRAD,HNSC,BRCA
1	ENSG00000255521.1.vs.ENSG00000136931.8	2	HNSC,BRCA
1	ENSG00000279141.2.vs.ENSG00000196119.6	1	STAD
1	ENSG00000060656.18.vs.ENSG00000159228.11	1	LUSC
1	ENSG00000251350.1.vs.ENSG00000163762.5	1	BRCA
1	ENSG00000251179.1.vs.ENSG00000159403.14	2	KIRP,THCA
1	ENSG00000164122.7.vs.ENSG00000105197.9	1	KIRC
1	ENSG00000251247.8.vs.ENSG00000211452.9	1	HNSC
1	ENSG00000174705.10.vs.ENSG00000196550.9	1	BLCA
1	ENSG00000182230.10.vs.ENSG00000143546.8	1	STAD
1	ENSG00000116198.11.vs.ENSG00000197405.6	1	PRAD
1	ENSG00000123453.15.vs.ENSG00000214954.7	3	LUAD,PRAD,COAD
1	ENSG00000144566.9.vs.ENSG00000261481.1	1	LIHC
1	ENSG00000181744.7.vs.ENSG00000188859.6	1	STAD
1	ENSG00000062524.14.vs.ENSG00000104635.12	1	BRCA
1	ENSG00000271869.1.vs.ENSG00000272443.1	1	COAD
1	ENSG00000006712.13.vs.ENSG00000258941.3	1	COAD
1	ENSG00000136770.9.vs.ENSG00000040731.9	1	PRAD
1	ENSG00000172889.14.vs.ENSG00000116962.13	1	THCA
1	ENSG00000100504.15.vs.ENSG00000236051.5	1	BRCA
1	ENSG00000157152.15.vs.ENSG00000142619.4	1	UCEC
1	ENSG00000181092.8.vs.ENSG00000139154.13	1	HNSC
1	ENSG00000229999.5.vs.ENSG00000258818.3	2	STAD,LUAD
1	ENSG00000240972.1.vs.ENSG00000178026.11	1	KIRC
1	ENSG00000169764.13.vs.ENSG00000171681.11	1	HNSC
1	ENSG00000171914.13.vs.ENSG00000165097.12	2	LUAD,COAD
1	ENSG00000132466.16.vs.ENSG00000099260.9	3	KIRC,BRCA,THCA
1	ENSG00000165521.14.vs.ENSG00000267551.3	1	LUSC
1	ENSG00000255794.5.vs.ENSG00000184060.9	1	PRAD
1	ENSG00000245468.3.vs.ENSG00000185236.10	2	LIHC,COAD
1	ENSG00000234283.1.vs.ENSG00000272430.1	1	UCEC
1	ENSG00000121753.11.vs.ENSG00000258890.5	1	STAD
1	ENSG00000232498.1.vs.ENSG00000166181.11	1	LUSC
1	ENSG00000112167.8.vs.ENSG00000138587.5	1	BRCA
1	ENSG00000196605.6.vs.ENSG00000152683.13	1	LIHC
1	ENSG00000143869.6.vs.ENSG00000164638.9	2	STAD,LUAD
1	ENSG00000104972.13.vs.ENSG00000177640.14	1	LUSC
1	ENSG00000212978.6.vs.ENSG00000092068.17	1	KIRC
1	ENSG00000112306.7.vs.ENSG00000102547.17	1	BRCA
1	ENSG00000151917.16.vs.ENSG00000168275.13	1	HNSC
1	ENSG00000243156.6.vs.ENSG00000035862.11	2	LIHC,STAD
1	ENSG00000204165.5.vs.ENSG00000146233.6	1	LUAD
1	ENSG00000171522.5.vs.ENSG00000139133.5	2	BLCA,KIRC
1	ENSG00000183837.9.vs.ENSG00000228393.3	1	KIRC
1	ENSG00000169762.15.vs.ENSG00000263627.1	1	PRAD
1	ENSG00000163743.12.vs.ENSG00000168026.15	1	STAD
1	ENSG00000157404.14.vs.ENSG00000249437.6	2	LUAD,PRAD
1	ENSG00000146904.7.vs.ENSG00000165757.8	1	STAD
1	ENSG00000143493.11.vs.ENSG00000072182.11	2	LIHC,BLCA
1	ENSG00000084112.13.vs.ENSG00000162909.16	1	STAD
1	ENSG00000258593.2.vs.ENSG00000273335.1	1	BLCA
1	ENSG00000141854.6.vs.ENSG00000124535.14	1	LUSC
1	ENSG00000230461.7.vs.ENSG00000260167.1	1	UCEC
1	ENSG00000089009.14.vs.ENSG00000165115.13	1	UCEC
1	ENSG00000176087.13.vs.ENSG00000275210.1	2	LUAD,COAD
1	ENSG00000006652.12.vs.ENSG00000231721.5	2	LUSC,PRAD
1	ENSG00000178162.7.vs.ENSG00000205361.7	1	PRAD
1	ENSG00000144909.7.vs.ENSG00000249430.1	1	LUAD
1	ENSG00000099960.11.vs.ENSG00000186088.14	1	BRCA
1	ENSG00000020129.14.vs.ENSG00000109193.9	1	HNSC
1	ENSG00000051009.9.vs.ENSG00000096401.7	1	STAD
1	ENSG00000231274.5.vs.ENSG00000127989.12	1	KIRC
1	ENSG00000203985.9.vs.ENSG00000136856.16	1	PRAD
1	ENSG00000258704.4.vs.ENSG00000146247.13	1	STAD
1	ENSG00000253552.6.vs.ENSG00000177989.12	3	STAD,KIRC,BRCA
1	ENSG00000105698.14.vs.ENSG00000135312.5	1	BRCA
1	ENSG00000178999.11.vs.ENSG00000197958.11	1	LUAD
1	ENSG00000189410.10.vs.ENSG00000154265.14	2	PRAD,KIRC
1	ENSG00000257925.1.vs.ENSG00000124214.18	1	STAD
1	ENSG00000154553.12.vs.ENSG00000254815.4	1	LUSC
1	ENSG00000188647.11.vs.ENSG00000263002.6	1	UCEC
1	ENSG00000244617.2.vs.ENSG00000158164.6	2	THCA,UCEC
1	ENSG00000151023.15.vs.ENSG00000240891.5	1	HNSC
1	ENSG00000250282.1.vs.ENSG00000110245.10	1	LIHC
1	ENSG00000163909.7.vs.ENSG00000228172.4	1	HNSC
1	ENSG00000116128.8.vs.ENSG00000228835.1	1	BLCA
1	ENSG00000186871.6.vs.ENSG00000272717.1	1	COAD
1	ENSG00000222043.2.vs.ENSG00000279400.1	1	STAD
1	ENSG00000145721.10.vs.ENSG00000258851.1	1	THCA
1	ENSG00000198046.10.vs.ENSG00000109107.12	1	HNSC
1	ENSG00000127463.12.vs.ENSG00000126467.9	1	STAD
1	ENSG00000165821.10.vs.ENSG00000122122.9	1	STAD
1	ENSG00000236901.4.vs.ENSG00000100319.12	1	HNSC
1	ENSG00000115216.12.vs.ENSG00000253986.1	1	BRCA
1	ENSG00000178209.13.vs.ENSG00000179862.6	2	COAD,UCEC
1	ENSG00000197217.11.vs.ENSG00000175315.2	2	COAD,THCA
1	ENSG00000074071.12.vs.ENSG00000127526.12	1	STAD
1	ENSG00000230368.2.vs.ENSG00000251669.4	1	LUAD
1	ENSG00000203710.9.vs.ENSG00000125741.4	1	LUAD
1	ENSG00000204542.2.vs.ENSG00000156313.11	1	STAD
1	ENSG00000272789.1.vs.ENSG00000171680.19	1	STAD
1	ENSG00000259536.4.vs.ENSG00000148426.11	1	BRCA
1	ENSG00000147113.15.vs.ENSG00000129194.6	1	KIRP
1	ENSG00000176092.12.vs.ENSG00000095110.6	3	STAD,PRAD,BLCA
1	ENSG00000113810.14.vs.ENSG00000196187.10	1	LIHC
1	ENSG00000267551.3.vs.ENSG00000089057.13	4	LUSC,PRAD,BLCA,KIRC
1	ENSG00000175602.3.vs.ENSG00000143545.7	1	COAD
1	ENSG00000221823.9.vs.ENSG00000272476.1	1	STAD
1	ENSG00000272076.1.vs.ENSG00000176624.10	2	BLCA,BRCA
1	ENSG00000239779.5.vs.ENSG00000101405.3	2	STAD,HNSC
1	ENSG00000183741.10.vs.ENSG00000161533.10	2	LIHC,LUAD
1	ENSG00000236761.5.vs.ENSG00000154305.15	1	KIRC
1	ENSG00000155100.9.vs.ENSG00000150893.10	2	LUAD,HNSC
1	ENSG00000169194.8.vs.ENSG00000248098.9	3	LIHC,LUAD,BRCA
1	ENSG00000230433.1.vs.ENSG00000001167.13	1	BRCA
1	ENSG00000268949.1.vs.ENSG00000235647.1	1	HNSC
1	ENSG00000135722.7.vs.ENSG00000133256.11	1	COAD
1	ENSG00000198924.6.vs.ENSG00000176293.18	1	BRCA
1	ENSG00000144550.11.vs.ENSG00000280255.1	1	KIRC
1	ENSG00000077616.9.vs.ENSG00000165521.14	1	STAD
1	ENSG00000103245.12.vs.ENSG00000165119.17	2	LUAD,LUSC
1	ENSG00000142544.6.vs.ENSG00000177108.5	1	PRAD
1	ENSG00000137804.11.vs.ENSG00000108106.12	1	KIRC
1	ENSG00000163754.16.vs.ENSG00000180900.15	1	STAD
1	ENSG00000232450.1.vs.ENSG00000175336.9	1	STAD
1	ENSG00000119878.5.vs.ENSG00000222043.2	2	COAD,BRCA
1	ENSG00000115361.6.vs.ENSG00000185615.14	1	STAD
1	ENSG00000272669.1.vs.ENSG00000107719.8	1	COAD
1	ENSG00000107882.10.vs.ENSG00000205414.1	2	BLCA,UCEC
1	ENSG00000145555.13.vs.ENSG00000196220.14	2	LUAD,PRAD
1	ENSG00000125255.6.vs.ENSG00000140455.15	1	KIRC
1	ENSG00000103404.13.vs.ENSG00000121904.16	2	LUSC,KIRC
1	ENSG00000186907.6.vs.ENSG00000185215.7	2	STAD,BRCA
1	ENSG00000095319.13.vs.ENSG00000277288.2	2	LIHC,BRCA
1	ENSG00000024422.10.vs.ENSG00000234311.1	1	PRAD
1	ENSG00000261584.1.vs.ENSG00000165837.10	1	LUAD
1	ENSG00000168291.11.vs.ENSG00000100387.8	1	STAD
1	ENSG00000168158.3.vs.ENSG00000154330.11	1	KIRP
1	ENSG00000138593.7.vs.ENSG00000162711.15	1	PRAD
1	ENSG00000126883.15.vs.ENSG00000171161.11	1	LIHC
1	ENSG00000233723.6.vs.ENSG00000115616.2	1	STAD
1	ENSG00000279375.1.vs.ENSG00000135766.8	1	LUSC
1	ENSG00000144713.11.vs.ENSG00000111676.13	1	UCEC
1	ENSG00000048140.16.vs.ENSG00000100902.9	2	STAD,LUAD
1	ENSG00000100784.8.vs.ENSG00000259456.3	1	KIRC
1	ENSG00000233968.5.vs.ENSG00000100307.11	2	STAD,PRAD
1	ENSG00000122025.13.vs.ENSG00000149534.7	1	HNSC
1	ENSG00000276408.1.vs.ENSG00000003137.7	1	KIRP
1	ENSG00000112306.7.vs.ENSG00000172830.11	2	KIRP,BRCA
1	ENSG00000139192.10.vs.ENSG00000044524.9	3	LIHC,STAD,BRCA
1	ENSG00000106266.7.vs.ENSG00000126821.7	1	KIRP
1	ENSG00000186522.13.vs.ENSG00000248538.5	1	HNSC
1	ENSG00000144597.12.vs.ENSG00000136247.13	1	LUSC
1	ENSG00000162460.6.vs.ENSG00000170113.14	1	BRCA
1	ENSG00000227959.1.vs.ENSG00000274276.3	1	LUSC
1	ENSG00000143006.7.vs.ENSG00000232300.1	1	STAD
1	ENSG00000196329.9.vs.ENSG00000108175.15	2	PRAD,BRCA
1	ENSG00000227145.1.vs.ENSG00000196670.12	1	LUAD
1	ENSG00000134375.9.vs.ENSG00000266644.1	1	BRCA
1	ENSG00000182095.13.vs.ENSG00000148297.14	3	STAD,COAD,HNSC
1	ENSG00000237513.1.vs.ENSG00000198155.5	2	STAD,BRCA
1	ENSG00000165895.16.vs.ENSG00000174680.8	1	KIRC
1	ENSG00000198870.7.vs.ENSG00000224596.6	1	LIHC
1	ENSG00000175984.13.vs.ENSG00000175322.10	1	STAD
1	ENSG00000137462.6.vs.ENSG00000174243.8	1	LUAD
1	ENSG00000210196.2.vs.ENSG00000163827.11	2	LIHC,KIRC
1	ENSG00000198954.5.vs.ENSG00000274211.3	1	BRCA
1	ENSG00000227218.6.vs.ENSG00000157933.9	1	LIHC
1	ENSG00000048544.5.vs.ENSG00000125356.6	1	BRCA
1	ENSG00000149609.5.vs.ENSG00000142731.9	1	COAD
1	ENSG00000154822.14.vs.ENSG00000106290.13	2	LUAD,COAD
1	ENSG00000230246.6.vs.ENSG00000236957.6	1	STAD
1	ENSG00000112667.11.vs.ENSG00000135953.9	2	STAD,BRCA
1	ENSG00000129167.8.vs.ENSG00000146166.15	2	BLCA,BRCA
1	ENSG00000130726.10.vs.ENSG00000163810.10	2	LIHC,BRCA
1	ENSG00000198825.10.vs.ENSG00000186090.9	1	UCEC
1	ENSG00000166546.12.vs.ENSG00000267892.1	1	HNSC
1	ENSG00000183598.3.vs.ENSG00000176105.12	1	UCEC
1	ENSG00000197982.13.vs.ENSG00000271816.1	1	UCEC
1	ENSG00000057704.9.vs.ENSG00000184163.3	1	STAD
1	ENSG00000174886.11.vs.ENSG00000164933.10	1	LUSC
1	ENSG00000123405.12.vs.ENSG00000267280.4	2	COAD,BRCA
1	ENSG00000170950.4.vs.ENSG00000107949.15	2	BRCA,UCEC
1	ENSG00000104835.13.vs.ENSG00000270720.1	1	BRCA
1	ENSG00000258498.5.vs.ENSG00000255079.1	1	LUSC
1	ENSG00000121380.11.vs.ENSG00000114638.6	1	LUAD
1	ENSG00000009335.16.vs.ENSG00000269956.1	2	LIHC,LUSC
1	ENSG00000134590.12.vs.ENSG00000267733.4	1	LUAD
1	ENSG00000259438.1.vs.ENSG00000280287.1	1	STAD
1	ENSG00000150471.14.vs.ENSG00000129167.8	1	BRCA
1	ENSG00000164125.14.vs.ENSG00000250644.2	1	STAD
1	ENSG00000113719.14.vs.ENSG00000254602.1	1	HNSC
1	ENSG00000105639.17.vs.ENSG00000137831.13	1	LIHC
1	ENSG00000211937.3.vs.ENSG00000279561.1	1	COAD
1	ENSG00000147036.10.vs.ENSG00000128564.6	2	PRAD,BLCA
1	ENSG00000138642.13.vs.ENSG00000205890.3	1	BLCA
1	ENSG00000179133.10.vs.ENSG00000259736.1	1	BRCA
1	ENSG00000142449.11.vs.ENSG00000101074.3	1	BLCA
1	ENSG00000237491.7.vs.ENSG00000253967.1	2	STAD,HNSC
1	ENSG00000149948.12.vs.ENSG00000257704.3	2	LIHC,KIRC
1	ENSG00000273901.1.vs.ENSG00000184619.3	1	BRCA
1	ENSG00000120008.14.vs.ENSG00000157429.14	1	BLCA
1	ENSG00000148925.9.vs.ENSG00000186081.10	3	LUSC,BLCA,COAD
1	ENSG00000165556.9.vs.ENSG00000163462.16	1	UCEC
1	ENSG00000223547.8.vs.ENSG00000133119.11	1	COAD
1	ENSG00000168904.13.vs.ENSG00000258162.2	1	PRAD
1	ENSG00000183850.12.vs.ENSG00000181038.12	1	STAD
1	ENSG00000259692.4.vs.ENSG00000163608.13	2	STAD,HNSC
1	ENSG00000167617.2.vs.ENSG00000104442.8	2	STAD,BRCA
1	ENSG00000071073.11.vs.ENSG00000103994.15	1	PRAD
1	ENSG00000116199.10.vs.ENSG00000249911.1	2	LUAD,LUSC
1	ENSG00000212993.4.vs.ENSG00000119283.14	1	COAD
1	ENSG00000142632.15.vs.ENSG00000203386.5	1	STAD
1	ENSG00000128951.12.vs.ENSG00000168615.10	1	PRAD
1	ENSG00000256894.1.vs.ENSG00000126107.13	2	STAD,LUAD
1	ENSG00000234636.2.vs.ENSG00000164715.5	2	PRAD,HNSC
1	ENSG00000116218.11.vs.ENSG00000204599.13	1	BLCA
1	ENSG00000176532.3.vs.ENSG00000188033.8	1	PRAD
1	ENSG00000167941.2.vs.ENSG00000204348.8	1	KIRP
1	ENSG00000100505.12.vs.ENSG00000119138.4	1	HNSC
1	ENSG00000172780.15.vs.ENSG00000172348.13	2	PRAD,BRCA
1	ENSG00000261236.4.vs.ENSG00000205937.10	2	STAD,PRAD
1	ENSG00000205359.8.vs.ENSG00000066248.13	1	HNSC
1	ENSG00000175093.4.vs.ENSG00000162639.14	1	LIHC
1	ENSG00000259426.4.vs.ENSG00000162723.8	2	HNSC,BRCA
1	ENSG00000273311.1.vs.ENSG00000276116.2	1	STAD
1	ENSG00000173041.10.vs.ENSG00000160131.12	3	HNSC,KIRC,UCEC
1	ENSG00000271901.1.vs.ENSG00000136933.15	1	HNSC
1	ENSG00000136270.12.vs.ENSG00000163909.7	1	STAD
1	ENSG00000124733.3.vs.ENSG00000056050.6	2	KIRC,BRCA
1	ENSG00000147316.11.vs.ENSG00000276900.1	1	STAD
1	ENSG00000049130.12.vs.ENSG00000062582.12	1	PRAD
1	ENSG00000141198.12.vs.ENSG00000254231.1	1	LUAD
1	ENSG00000073670.12.vs.ENSG00000258334.1	2	STAD,LUAD
1	ENSG00000112210.10.vs.ENSG00000205002.3	1	HNSC
1	ENSG00000259436.1.vs.ENSG00000168661.13	1	STAD
1	ENSG00000198168.7.vs.ENSG00000243944.4	1	HNSC
1	ENSG00000166446.13.vs.ENSG00000170293.7	1	THCA
1	ENSG00000163002.11.vs.ENSG00000155463.11	1	BRCA
1	ENSG00000165125.16.vs.ENSG00000163541.10	2	LUSC,KIRP
1	ENSG00000185522.7.vs.ENSG00000226950.5	4	STAD,COAD,HNSC,KIRP
1	ENSG00000174460.3.vs.ENSG00000223855.1	1	PRAD
1	ENSG00000226287.6.vs.ENSG00000270112.3	1	KIRP
1	ENSG00000130939.17.vs.ENSG00000261787.1	1	STAD
1	ENSG00000156253.5.vs.ENSG00000164933.10	2	LUAD,LUSC
1	ENSG00000123342.14.vs.ENSG00000186417.12	2	PRAD,BLCA
1	ENSG00000141469.15.vs.ENSG00000124939.5	1	PRAD
1	ENSG00000127903.13.vs.ENSG00000183347.14	1	PRAD
1	ENSG00000214796.7.vs.ENSG00000092295.10	2	LUAD,BLCA
1	ENSG00000136689.17.vs.ENSG00000172322.12	2	LUAD,LUSC
1	ENSG00000168928.11.vs.ENSG00000185442.11	2	STAD,PRAD
1	ENSG00000151611.12.vs.ENSG00000165591.6	3	HNSC,KIRP,BRCA
1	ENSG00000205250.7.vs.ENSG00000096717.10	1	LIHC
1	ENSG00000227687.1.vs.ENSG00000099625.11	1	LUAD
1	ENSG00000267296.2.vs.ENSG00000091972.17	3	LUSC,KIRC,BRCA
1	ENSG00000178690.2.vs.ENSG00000224260.5	1	LUSC
1	ENSG00000235890.2.vs.ENSG00000099995.17	1	KIRP
1	ENSG00000104067.15.vs.ENSG00000140057.7	2	BLCA,KIRP
1	ENSG00000183747.10.vs.ENSG00000256884.1	1	KIRP
1	ENSG00000154736.5.vs.ENSG00000240476.1	3	STAD,LUSC,HNSC
1	ENSG00000179832.16.vs.ENSG00000225302.2	1	LUAD
1	ENSG00000211450.8.vs.ENSG00000167754.11	2	LUAD,THCA
1	ENSG00000111540.14.vs.ENSG00000165084.14	1	KIRP
1	ENSG00000197933.11.vs.ENSG00000258699.1	1	LUAD
1	ENSG00000152377.11.vs.ENSG00000136696.9	1	STAD
1	ENSG00000259577.1.vs.ENSG00000174428.15	1	BRCA
1	ENSG00000226245.1.vs.ENSG00000103423.12	2	LIHC,UCEC
1	ENSG00000167695.13.vs.ENSG00000246528.3	1	COAD
1	ENSG00000110723.10.vs.ENSG00000235381.1	2	LUAD,PRAD
1	ENSG00000186862.16.vs.ENSG00000181924.6	2	KIRP,THCA
1	ENSG00000112033.12.vs.ENSG00000198300.11	1	BRCA
1	ENSG00000128513.13.vs.ENSG00000177854.7	2	COAD,KIRC
1	ENSG00000135362.12.vs.ENSG00000105875.12	1	HNSC
1	ENSG00000110675.11.vs.ENSG00000225756.1	1	LIHC
1	ENSG00000225032.4.vs.ENSG00000167562.10	1	PRAD
1	ENSG00000038210.12.vs.ENSG00000142409.5	1	KIRC
1	ENSG00000168843.12.vs.ENSG00000104835.13	1	STAD
1	ENSG00000161013.15.vs.ENSG00000163827.11	1	PRAD
1	ENSG00000183960.7.vs.ENSG00000009830.10	2	PRAD,BRCA
1	ENSG00000163472.17.vs.ENSG00000037241.6	1	LUSC
1	ENSG00000016602.9.vs.ENSG00000229312.2	1	HNSC
1	ENSG00000130749.8.vs.ENSG00000153976.2	1	KIRC
1	ENSG00000079931.13.vs.ENSG00000228863.7	2	LUAD,HNSC
1	ENSG00000137672.11.vs.ENSG00000162892.14	1	LIHC
1	ENSG00000139865.15.vs.ENSG00000234899.8	1	STAD
1	ENSG00000152795.16.vs.ENSG00000205413.6	2	KIRC,BRCA
1	ENSG00000272255.1.vs.ENSG00000171992.11	1	BRCA
1	ENSG00000225163.3.vs.ENSG00000168802.11	2	COAD,BRCA
1	ENSG00000159884.10.vs.ENSG00000168671.8	2	KIRC,BRCA
1	ENSG00000214814.5.vs.ENSG00000152931.7	1	LIHC
1	ENSG00000063587.13.vs.ENSG00000166128.11	4	STAD,LUAD,BLCA,COAD
1	ENSG00000114948.11.vs.ENSG00000227392.1	1	STAD
1	ENSG00000161912.16.vs.ENSG00000264061.1	1	BRCA
1	ENSG00000155324.8.vs.ENSG00000162946.19	1	PRAD
1	ENSG00000185046.17.vs.ENSG00000092445.10	1	STAD
1	ENSG00000215252.10.vs.ENSG00000215022.6	1	LUAD
1	ENSG00000185808.12.vs.ENSG00000158714.9	2	LIHC,KIRC
1	ENSG00000262372.1.vs.ENSG00000160401.13	2	LIHC,HNSC
1	ENSG00000204257.13.vs.ENSG00000167962.11	1	THCA
1	ENSG00000109586.10.vs.ENSG00000198759.10	1	BRCA
1	ENSG00000246451.2.vs.ENSG00000174928.14	2	STAD,HNSC
1	ENSG00000224020.1.vs.ENSG00000179588.7	2	BLCA,KIRC
1	ENSG00000138778.10.vs.ENSG00000173473.9	1	BRCA
1	ENSG00000157368.9.vs.ENSG00000188107.12	1	PRAD
1	ENSG00000259523.1.vs.ENSG00000225830.9	2	LUAD,BLCA
1	ENSG00000136824.17.vs.ENSG00000164363.9	1	COAD
1	ENSG00000143499.12.vs.ENSG00000205231.1	2	PRAD,BLCA
1	ENSG00000257122.4.vs.ENSG00000156471.11	2	LIHC,COAD
1	ENSG00000175482.7.vs.ENSG00000167881.13	1	BRCA
1	ENSG00000270882.2.vs.ENSG00000151414.13	1	THCA
1	ENSG00000147036.10.vs.ENSG00000261707.1	1	THCA
1	ENSG00000084733.9.vs.ENSG00000066827.14	2	HNSC,BRCA
1	ENSG00000101825.7.vs.ENSG00000107105.13	1	KIRC
1	ENSG00000158470.5.vs.ENSG00000272308.1	1	STAD
1	ENSG00000100852.11.vs.ENSG00000228293.1	1	BRCA
1	ENSG00000103740.8.vs.ENSG00000139154.13	1	BLCA
1	ENSG00000138079.12.vs.ENSG00000103005.10	2	STAD,BLCA
1	ENSG00000169359.12.vs.ENSG00000112167.8	1	LUSC
1	ENSG00000117152.12.vs.ENSG00000090487.9	1	STAD
1	ENSG00000197956.8.vs.ENSG00000226979.7	1	LIHC
1	ENSG00000259065.1.vs.ENSG00000176040.12	1	BRCA
1	ENSG00000175575.11.vs.ENSG00000110777.10	2	HNSC,THCA
1	ENSG00000087191.11.vs.ENSG00000269526.1	1	STAD
1	ENSG00000165288.10.vs.ENSG00000178033.5	1	LIHC
1	ENSG00000255819.5.vs.ENSG00000112186.10	1	BRCA
1	ENSG00000004534.13.vs.ENSG00000231890.6	1	STAD
1	ENSG00000244968.5.vs.ENSG00000137392.8	1	STAD
1	ENSG00000105849.5.vs.ENSG00000140987.18	1	COAD
1	ENSG00000211450.8.vs.ENSG00000170458.12	1	THCA
1	ENSG00000173811.9.vs.ENSG00000114739.12	1	STAD
1	ENSG00000137491.13.vs.ENSG00000165678.18	1	STAD
1	ENSG00000169220.16.vs.ENSG00000170091.9	1	BRCA
1	ENSG00000198771.9.vs.ENSG00000163040.13	1	LIHC
1	ENSG00000256028.2.vs.ENSG00000232640.1	2	LIHC,HNSC
1	ENSG00000205707.9.vs.ENSG00000166233.11	1	STAD
1	ENSG00000206053.11.vs.ENSG00000180660.7	1	LUSC
1	ENSG00000089195.13.vs.ENSG00000180287.15	1	KIRP
1	ENSG00000107736.18.vs.ENSG00000004799.7	2	STAD,KIRC
1	ENSG00000198846.5.vs.ENSG00000182890.4	2	STAD,PRAD
1	ENSG00000177082.11.vs.ENSG00000143398.18	1	BRCA
1	ENSG00000279145.1.vs.ENSG00000178573.6	1	STAD
1	ENSG00000102096.9.vs.ENSG00000179134.13	2	LUAD,COAD
1	ENSG00000267291.1.vs.ENSG00000136881.10	1	LUAD
1	ENSG00000067113.15.vs.ENSG00000227540.1	2	LUAD,UCEC
1	ENSG00000272716.1.vs.ENSG00000173714.7	1	STAD
1	ENSG00000133706.16.vs.ENSG00000112941.11	1	LUAD
1	ENSG00000103599.18.vs.ENSG00000154642.9	1	STAD
1	ENSG00000262558.1.vs.ENSG00000185567.6	1	LIHC
1	ENSG00000179241.11.vs.ENSG00000169398.18	3	LIHC,BLCA,COAD
1	ENSG00000173846.11.vs.ENSG00000026508.15	2	LUAD,THCA
1	ENSG00000161640.14.vs.ENSG00000130244.11	1	BRCA
1	ENSG00000099954.17.vs.ENSG00000250641.1	1	COAD
1	ENSG00000182376.2.vs.ENSG00000185345.17	1	KIRP
1	ENSG00000277589.1.vs.ENSG00000198670.10	1	LUAD
1	ENSG00000114805.15.vs.ENSG00000152952.10	1	KIRC
1	ENSG00000065600.11.vs.ENSG00000157227.11	2	KIRC,THCA
1	ENSG00000248905.7.vs.ENSG00000151413.15	2	LIHC,STAD
1	ENSG00000114739.12.vs.ENSG00000232194.1	1	BRCA
1	ENSG00000163611.10.vs.ENSG00000188523.7	3	HNSC,KIRC,UCEC
1	ENSG00000139718.9.vs.ENSG00000139318.7	2	LIHC,KIRP
1	ENSG00000110090.11.vs.ENSG00000125826.18	1	STAD
1	ENSG00000153443.11.vs.ENSG00000135423.11	1	BRCA
1	ENSG00000196588.13.vs.ENSG00000213390.9	1	LIHC
1	ENSG00000176769.9.vs.ENSG00000085978.20	1	KIRC
1	ENSG00000261049.2.vs.ENSG00000006432.14	1	LUAD
1	ENSG00000225905.1.vs.ENSG00000280006.1	1	HNSC
1	ENSG00000244538.1.vs.ENSG00000247240.6	1	BRCA
1	ENSG00000268129.1.vs.ENSG00000124237.5	1	LUAD
1	ENSG00000262061.4.vs.ENSG00000014123.9	1	HNSC
1	ENSG00000089048.13.vs.ENSG00000196465.9	1	HNSC
1	ENSG00000185324.20.vs.ENSG00000137337.13	1	PRAD
1	ENSG00000162441.10.vs.ENSG00000139209.14	1	BRCA
1	ENSG00000178685.12.vs.ENSG00000140403.11	1	COAD
1	ENSG00000228624.6.vs.ENSG00000197757.7	1	COAD
1	ENSG00000182742.5.vs.ENSG00000137478.13	2	LIHC,KIRP
1	ENSG00000250510.6.vs.ENSG00000160310.15	1	HNSC
1	ENSG00000174780.14.vs.ENSG00000214782.6	2	LUAD,BRCA
1	ENSG00000112561.16.vs.ENSG00000204348.8	1	BLCA
1	ENSG00000183856.9.vs.ENSG00000121774.16	1	KIRC
1	ENSG00000175756.12.vs.ENSG00000112031.14	1	LIHC
1	ENSG00000130517.12.vs.ENSG00000231050.1	1	PRAD
1	ENSG00000169783.11.vs.ENSG00000134489.6	1	THCA
1	ENSG00000162641.17.vs.ENSG00000129437.8	2	BLCA,COAD
1	ENSG00000278601.1.vs.ENSG00000186187.10	2	KIRC,KIRP
1	ENSG00000150783.8.vs.ENSG00000150433.8	1	COAD
1	ENSG00000180773.13.vs.ENSG00000232519.2	1	LUSC
1	ENSG00000198883.10.vs.ENSG00000275410.3	1	LIHC
1	ENSG00000268041.1.vs.ENSG00000274363.1	2	STAD,UCEC
1	ENSG00000233006.5.vs.ENSG00000173221.12	2	KIRP,BRCA
1	ENSG00000258744.1.vs.ENSG00000101224.16	2	LIHC,UCEC
1	ENSG00000205846.3.vs.ENSG00000102189.15	1	BRCA
1	ENSG00000185442.11.vs.ENSG00000226476.2	1	KIRC
1	ENSG00000229666.1.vs.ENSG00000251537.4	1	BRCA
1	ENSG00000230939.1.vs.ENSG00000232680.2	2	STAD,KIRC
1	ENSG00000175161.12.vs.ENSG00000106771.11	1	PRAD
1	ENSG00000275392.1.vs.ENSG00000173950.14	1	THCA
1	ENSG00000183780.11.vs.ENSG00000196081.8	1	KIRP
1	ENSG00000139233.5.vs.ENSG00000198040.9	1	UCEC
1	ENSG00000273338.1.vs.ENSG00000146701.10	1	LUSC
1	ENSG00000156313.11.vs.ENSG00000255398.2	3	LIHC,KIRC,UCEC
1	ENSG00000124541.6.vs.ENSG00000125676.18	1	BRCA
1	ENSG00000204971.3.vs.ENSG00000099194.5	1	KIRC
1	ENSG00000204136.9.vs.ENSG00000165259.12	1	BRCA
1	ENSG00000109586.10.vs.ENSG00000280157.1	1	KIRP
1	ENSG00000166546.12.vs.ENSG00000137090.10	2	HNSC,THCA
1	ENSG00000196878.11.vs.ENSG00000109501.12	1	COAD
1	ENSG00000259577.1.vs.ENSG00000105784.14	1	LUSC
1	ENSG00000166411.12.vs.ENSG00000180846.7	1	LUAD
1	ENSG00000237054.8.vs.ENSG00000106336.11	1	BRCA
1	ENSG00000237759.1.vs.ENSG00000133265.9	1	LIHC
1	ENSG00000176533.11.vs.ENSG00000184005.10	3	STAD,PRAD,KIRC
1	ENSG00000082684.13.vs.ENSG00000151552.10	1	BRCA
1	ENSG00000217930.6.vs.ENSG00000198931.9	1	HNSC
1	ENSG00000140839.10.vs.ENSG00000258643.4	1	LIHC
1	ENSG00000153113.22.vs.ENSG00000168703.5	1	BLCA
1	ENSG00000276231.3.vs.ENSG00000113387.10	1	LUAD
1	ENSG00000115594.10.vs.ENSG00000221829.8	1	BRCA
1	ENSG00000267064.1.vs.ENSG00000167208.13	1	BLCA
1	ENSG00000185414.18.vs.ENSG00000151882.10	1	PRAD
1	ENSG00000058091.15.vs.ENSG00000136950.12	2	KIRC,THCA
1	ENSG00000110841.12.vs.ENSG00000256824.1	1	STAD
1	ENSG00000179598.5.vs.ENSG00000168439.15	1	UCEC
1	ENSG00000185215.7.vs.ENSG00000171722.10	1	LUAD
1	ENSG00000100503.22.vs.ENSG00000233087.6	1	PRAD
1	ENSG00000182771.16.vs.ENSG00000274918.1	1	KIRC
1	ENSG00000278023.3.vs.ENSG00000198860.10	1	UCEC
1	ENSG00000101000.4.vs.ENSG00000065060.15	1	LIHC
1	ENSG00000166897.13.vs.ENSG00000129465.14	1	BRCA
1	ENSG00000145808.7.vs.ENSG00000166016.5	1	LUSC
1	ENSG00000256633.1.vs.ENSG00000125895.5	1	LUAD
1	ENSG00000173698.16.vs.ENSG00000196976.6	2	LIHC,UCEC
1	ENSG00000137078.7.vs.ENSG00000167656.4	3	LUSC,PRAD,KIRC
1	ENSG00000104164.9.vs.ENSG00000177699.4	1	BRCA
1	ENSG00000233436.6.vs.ENSG00000183508.4	1	STAD
1	ENSG00000251002.6.vs.ENSG00000246560.2	1	STAD
1	ENSG00000118263.13.vs.ENSG00000073861.2	1	LUSC
1	ENSG00000146592.15.vs.ENSG00000167723.13	1	COAD
1	ENSG00000026652.12.vs.ENSG00000157873.16	2	KIRC,KIRP
1	ENSG00000185565.10.vs.ENSG00000185453.11	1	BRCA
1	ENSG00000145365.10.vs.ENSG00000138378.16	2	STAD,COAD
1	ENSG00000182890.4.vs.ENSG00000109846.6	1	PRAD
1	ENSG00000138434.15.vs.ENSG00000266936.1	1	BLCA
1	ENSG00000086015.19.vs.ENSG00000246339.5	2	LIHC,PRAD
1	ENSG00000106302.8.vs.ENSG00000205309.12	1	BRCA
1	ENSG00000206560.9.vs.ENSG00000162927.12	1	BLCA
1	ENSG00000176769.9.vs.ENSG00000224578.4	1	LUSC
1	ENSG00000176953.9.vs.ENSG00000136997.13	1	COAD
1	ENSG00000183426.14.vs.ENSG00000214595.10	2	LIHC,BRCA
1	ENSG00000178882.12.vs.ENSG00000228137.1	1	STAD
1	ENSG00000255557.1.vs.ENSG00000267279.1	1	BRCA
1	ENSG00000147130.13.vs.ENSG00000136930.11	1	BRCA
1	ENSG00000183960.7.vs.ENSG00000242593.4	1	LUAD
1	ENSG00000129219.12.vs.ENSG00000150045.10	1	HNSC
1	ENSG00000136193.15.vs.ENSG00000118777.9	1	LIHC
1	ENSG00000272695.1.vs.ENSG00000172594.11	1	PRAD
1	ENSG00000231877.1.vs.ENSG00000255733.4	1	STAD
1	ENSG00000077063.9.vs.ENSG00000010322.14	1	PRAD
1	ENSG00000264569.1.vs.ENSG00000246705.4	1	LUSC
1	ENSG00000156030.11.vs.ENSG00000100764.12	1	BRCA
1	ENSG00000081248.9.vs.ENSG00000113615.11	1	LUSC
1	ENSG00000232815.1.vs.ENSG00000182979.16	2	STAD,HNSC
1	ENSG00000151229.11.vs.ENSG00000131725.12	1	KIRC
1	ENSG00000102760.12.vs.ENSG00000280332.1	3	LUAD,LUSC,KIRC
1	ENSG00000168685.13.vs.ENSG00000143847.14	2	LUAD,KIRC
1	ENSG00000279267.1.vs.ENSG00000104885.16	1	LUSC
1	ENSG00000163904.11.vs.ENSG00000176700.18	1	STAD
1	ENSG00000224318.4.vs.ENSG00000123415.13	1	STAD
1	ENSG00000253276.2.vs.ENSG00000143110.10	1	HNSC
1	ENSG00000127952.15.vs.ENSG00000168060.13	1	STAD
1	ENSG00000163519.12.vs.ENSG00000162366.6	2	LIHC,PRAD
1	ENSG00000169733.10.vs.ENSG00000269974.1	1	STAD
1	ENSG00000105675.7.vs.ENSG00000239322.1	2	STAD,LUAD
1	ENSG00000073792.14.vs.ENSG00000108465.13	1	PRAD
1	ENSG00000004848.6.vs.ENSG00000121769.6	1	PRAD
1	ENSG00000244151.1.vs.ENSG00000120913.22	1	BRCA
1	ENSG00000073969.17.vs.ENSG00000156253.5	1	KIRC
1	ENSG00000261105.4.vs.ENSG00000147036.10	2	PRAD,BLCA
1	ENSG00000110777.10.vs.ENSG00000005007.11	1	BRCA
1	ENSG00000175073.7.vs.ENSG00000214128.9	2	PRAD,KIRC
1	ENSG00000264364.2.vs.ENSG00000140332.14	1	THCA
1	ENSG00000248993.1.vs.ENSG00000170385.9	1	LUAD
1	ENSG00000167881.13.vs.ENSG00000267801.1	1	BRCA
1	ENSG00000202441.2.vs.ENSG00000248429.4	1	THCA
1	ENSG00000143850.11.vs.ENSG00000185739.12	1	STAD
1	ENSG00000277423.1.vs.ENSG00000248884.1	1	STAD
1	ENSG00000188807.11.vs.ENSG00000101412.12	1	COAD
1	ENSG00000237452.2.vs.ENSG00000101544.7	2	LUAD,COAD
1	ENSG00000266897.1.vs.ENSG00000143621.15	2	STAD,LUAD
1	ENSG00000138134.10.vs.ENSG00000259775.1	1	PRAD
1	ENSG00000125971.15.vs.ENSG00000146411.5	2	STAD,BLCA
1	ENSG00000022355.13.vs.ENSG00000213892.9	1	PRAD
1	ENSG00000274070.1.vs.ENSG00000174371.15	1	HNSC
1	ENSG00000237330.2.vs.ENSG00000182376.2	2	KIRP,BRCA
1	ENSG00000187726.7.vs.ENSG00000167103.10	3	STAD,PRAD,HNSC
1	ENSG00000127995.15.vs.ENSG00000242082.1	1	LUAD
1	ENSG00000232739.1.vs.ENSG00000270149.4	1	PRAD
1	ENSG00000122012.12.vs.ENSG00000185862.6	1	BRCA
1	ENSG00000134326.10.vs.ENSG00000068400.12	3	STAD,HNSC,BRCA
1	ENSG00000198721.11.vs.ENSG00000262228.2	2	STAD,BLCA
1	ENSG00000165806.18.vs.ENSG00000077254.13	1	BRCA
1	ENSG00000161860.7.vs.ENSG00000138744.13	1	COAD
1	ENSG00000232354.6.vs.ENSG00000153904.17	1	LUAD
1	ENSG00000279072.1.vs.ENSG00000225431.1	1	STAD
1	ENSG00000116273.5.vs.ENSG00000120314.17	2	LUAD,HNSC
1	ENSG00000161850.2.vs.ENSG00000142224.14	1	BLCA
1	ENSG00000075420.11.vs.ENSG00000164591.12	1	KIRC
1	ENSG00000141076.16.vs.ENSG00000146425.9	3	STAD,PRAD,KIRP
1	ENSG00000165025.13.vs.ENSG00000124160.10	2	KIRP,THCA
1	ENSG00000104343.18.vs.ENSG00000145882.9	1	BRCA
1	ENSG00000096872.14.vs.ENSG00000260428.2	2	LIHC,PRAD
1	ENSG00000146205.12.vs.ENSG00000180458.2	1	STAD
1	ENSG00000141741.10.vs.ENSG00000251573.2	1	STAD
1	ENSG00000273156.1.vs.ENSG00000118495.17	1	LIHC
1	ENSG00000203497.2.vs.ENSG00000139832.4	2	KIRC,THCA
1	ENSG00000151640.11.vs.ENSG00000179454.12	1	HNSC
1	ENSG00000168517.9.vs.ENSG00000276707.1	1	BLCA
1	ENSG00000055147.16.vs.ENSG00000115275.10	1	BRCA
1	ENSG00000249896.1.vs.ENSG00000187902.10	1	STAD
1	ENSG00000105675.7.vs.ENSG00000253293.4	1	LIHC
1	ENSG00000084636.16.vs.ENSG00000234636.2	2	LUAD,PRAD
1	ENSG00000274653.1.vs.ENSG00000186166.7	2	BRCA,UCEC
1	ENSG00000081277.10.vs.ENSG00000260302.1	1	PRAD
1	ENSG00000249464.4.vs.ENSG00000029993.13	1	PRAD
1	ENSG00000136842.12.vs.ENSG00000120868.12	2	LIHC,COAD
1	ENSG00000242193.8.vs.ENSG00000085511.18	2	LIHC,THCA
1	ENSG00000141367.10.vs.ENSG00000146122.15	1	KIRC
1	ENSG00000237950.1.vs.ENSG00000159200.16	2	LUSC,PRAD
1	ENSG00000177173.5.vs.ENSG00000267100.1	1	HNSC
1	ENSG00000168487.16.vs.ENSG00000207523.1	1	HNSC
1	ENSG00000151461.18.vs.ENSG00000158122.10	1	STAD
1	ENSG00000121892.13.vs.ENSG00000145331.12	1	BRCA
1	ENSG00000204427.10.vs.ENSG00000186891.12	1	COAD
1	ENSG00000149499.10.vs.ENSG00000158555.13	1	BRCA
1	ENSG00000137955.14.vs.ENSG00000137880.5	1	LUSC
1	ENSG00000183484.10.vs.ENSG00000135678.10	1	UCEC
1	ENSG00000132185.15.vs.ENSG00000056972.17	1	PRAD
1	ENSG00000173627.7.vs.ENSG00000106236.3	1	STAD
1	ENSG00000184271.14.vs.ENSG00000271850.1	2	PRAD,THCA
1	ENSG00000160993.3.vs.ENSG00000262884.1	1	LUAD
1	ENSG00000204365.4.vs.ENSG00000129003.14	1	STAD
1	ENSG00000172239.12.vs.ENSG00000166317.10	3	LUSC,BRCA,THCA
1	ENSG00000172478.16.vs.ENSG00000177156.9	1	LUSC
1	ENSG00000164946.18.vs.ENSG00000147124.11	1	HNSC
1	ENSG00000138135.6.vs.ENSG00000249115.7	1	BRCA
1	ENSG00000150471.14.vs.ENSG00000152409.8	1	BRCA
1	ENSG00000111801.14.vs.ENSG00000248677.1	1	KIRP
1	ENSG00000188825.12.vs.ENSG00000181908.5	2	LIHC,LUSC
1	ENSG00000111981.4.vs.ENSG00000162949.15	2	STAD,HNSC
1	ENSG00000249631.4.vs.ENSG00000196935.7	1	HNSC
1	ENSG00000078725.11.vs.ENSG00000073614.10	1	KIRC
1	ENSG00000101187.14.vs.ENSG00000261730.1	1	LUAD
1	ENSG00000112578.8.vs.ENSG00000265474.1	1	BRCA
1	ENSG00000160097.14.vs.ENSG00000018280.15	1	LUSC
1	ENSG00000235314.1.vs.ENSG00000196655.8	2	LIHC,LUAD
1	ENSG00000253379.4.vs.ENSG00000281560.1	1	UCEC
1	ENSG00000019505.6.vs.ENSG00000197385.5	2	BLCA,HNSC
1	ENSG00000180357.8.vs.ENSG00000258918.1	2	BLCA,COAD
1	ENSG00000156804.6.vs.ENSG00000185483.10	1	KIRC
1	ENSG00000223552.1.vs.ENSG00000145555.13	1	LIHC
1	ENSG00000280429.1.vs.ENSG00000277443.1	1	STAD
1	ENSG00000272461.1.vs.ENSG00000251664.3	1	HNSC
1	ENSG00000187266.12.vs.ENSG00000221953.5	1	LUSC
1	ENSG00000130201.6.vs.ENSG00000196074.11	2	HNSC,BRCA
1	ENSG00000176531.9.vs.ENSG00000100162.13	1	STAD
1	ENSG00000131095.10.vs.ENSG00000250451.4	1	KIRP
1	ENSG00000188886.3.vs.ENSG00000265100.1	2	STAD,BRCA
1	ENSG00000137267.5.vs.ENSG00000272405.1	1	LUSC
1	ENSG00000138109.9.vs.ENSG00000010318.18	1	HNSC
1	ENSG00000262903.1.vs.ENSG00000175183.8	1	PRAD
1	ENSG00000137674.3.vs.ENSG00000188223.9	1	UCEC
1	ENSG00000277010.1.vs.ENSG00000093134.12	2	LIHC,BRCA
1	ENSG00000138642.13.vs.ENSG00000213930.10	2	HNSC,BRCA
1	ENSG00000114279.12.vs.ENSG00000182324.6	1	HNSC
1	ENSG00000101194.16.vs.ENSG00000145864.11	1	HNSC
1	ENSG00000108262.14.vs.ENSG00000280213.1	2	COAD,UCEC
1	ENSG00000103064.12.vs.ENSG00000184731.5	1	PRAD
1	ENSG00000156170.11.vs.ENSG00000186446.10	1	LUAD
1	ENSG00000139880.18.vs.ENSG00000132005.7	2	LUSC,PRAD
1	ENSG00000129535.11.vs.ENSG00000110448.9	1	UCEC
1	ENSG00000198924.6.vs.ENSG00000155959.9	2	HNSC,UCEC
1	ENSG00000178078.10.vs.ENSG00000255221.2	1	PRAD
1	ENSG00000149781.11.vs.ENSG00000259351.1	1	BLCA
1	ENSG00000259116.1.vs.ENSG00000154832.13	1	LIHC
1	ENSG00000173801.15.vs.ENSG00000165591.6	1	LUSC
1	ENSG00000230499.1.vs.ENSG00000137731.12	1	KIRC
1	ENSG00000138796.14.vs.ENSG00000078399.14	1	LIHC
1	ENSG00000251257.2.vs.ENSG00000184786.5	1	LUAD
1	ENSG00000135315.10.vs.ENSG00000179165.10	1	PRAD
1	ENSG00000266076.1.vs.ENSG00000186132.13	1	COAD
1	ENSG00000169618.6.vs.ENSG00000168918.12	2	LUSC,BRCA
1	ENSG00000149196.14.vs.ENSG00000206422.2	1	HNSC
1	ENSG00000092208.15.vs.ENSG00000228393.3	1	BRCA
1	ENSG00000121653.10.vs.ENSG00000166634.5	1	BLCA
1	ENSG00000136275.9.vs.ENSG00000113555.5	1	STAD
1	ENSG00000206532.2.vs.ENSG00000225667.1	2	KIRC,UCEC
1	ENSG00000139410.13.vs.ENSG00000254756.1	1	BLCA
1	ENSG00000117507.4.vs.ENSG00000250673.1	1	PRAD
1	ENSG00000128310.2.vs.ENSG00000167394.11	1	LIHC
1	ENSG00000230074.1.vs.ENSG00000006042.10	1	COAD
1	ENSG00000111863.11.vs.ENSG00000197948.9	2	LIHC,PRAD
1	ENSG00000099617.3.vs.ENSG00000237870.5	1	STAD
1	ENSG00000266076.1.vs.ENSG00000232564.2	1	COAD
1	ENSG00000167550.9.vs.ENSG00000182885.15	1	UCEC
1	ENSG00000145725.18.vs.ENSG00000231160.8	1	STAD
1	ENSG00000116809.10.vs.ENSG00000111817.15	1	LUAD
1	ENSG00000268433.1.vs.ENSG00000145736.13	1	KIRP
1	ENSG00000186487.16.vs.ENSG00000143228.11	1	STAD
1	ENSG00000189144.12.vs.ENSG00000159714.9	1	KIRC
1	ENSG00000125775.13.vs.ENSG00000163072.13	1	STAD
1	ENSG00000210049.1.vs.ENSG00000209082.1	2	LIHC,KIRC
1	ENSG00000164850.13.vs.ENSG00000249425.1	1	HNSC
1	ENSG00000064999.13.vs.ENSG00000267141.1	1	LUSC
1	ENSG00000164163.9.vs.ENSG00000163938.15	1	LIHC
1	ENSG00000151702.15.vs.ENSG00000276449.1	1	THCA
1	ENSG00000253582.1.vs.ENSG00000180573.9	1	LUAD
1	ENSG00000164053.16.vs.ENSG00000258028.1	1	STAD
1	ENSG00000013364.17.vs.ENSG00000035928.13	1	LIHC
1	ENSG00000155792.8.vs.ENSG00000244619.2	1	LUAD
1	ENSG00000120694.18.vs.ENSG00000145555.13	1	PRAD
1	ENSG00000198863.6.vs.ENSG00000139132.13	2	LUAD,BLCA
1	ENSG00000272195.1.vs.ENSG00000165804.14	1	PRAD
1	ENSG00000182768.8.vs.ENSG00000085871.7	1	LUSC
1	ENSG00000112706.10.vs.ENSG00000004939.12	2	LIHC,THCA
1	ENSG00000235790.6.vs.ENSG00000164733.19	2	LUAD,THCA
1	ENSG00000159167.10.vs.ENSG00000131378.12	1	PRAD
1	ENSG00000272822.1.vs.ENSG00000152348.14	1	LUAD
1	ENSG00000163645.13.vs.ENSG00000249635.1	1	STAD
1	ENSG00000168612.4.vs.ENSG00000163633.9	1	BRCA
1	ENSG00000116586.10.vs.ENSG00000166860.2	1	BRCA
1	ENSG00000060140.7.vs.ENSG00000142512.13	1	LIHC
1	ENSG00000233529.1.vs.ENSG00000144659.9	1	STAD
1	ENSG00000251474.5.vs.ENSG00000162676.10	1	LUAD
1	ENSG00000114784.3.vs.ENSG00000177888.7	2	LUSC,BRCA
1	ENSG00000153993.12.vs.ENSG00000138095.17	1	LIHC
1	ENSG00000157107.12.vs.ENSG00000197580.10	1	THCA
1	ENSG00000011198.6.vs.ENSG00000172766.17	1	LUSC
1	ENSG00000099194.5.vs.ENSG00000262979.1	1	COAD
1	ENSG00000198715.10.vs.ENSG00000183258.10	2	LUAD,KIRC
1	ENSG00000217576.7.vs.ENSG00000215182.8	1	BRCA
1	ENSG00000176463.12.vs.ENSG00000262768.2	1	BRCA
1	ENSG00000277151.1.vs.ENSG00000104343.18	2	STAD,LUSC
1	ENSG00000147164.10.vs.ENSG00000164117.11	1	BRCA
1	ENSG00000254414.1.vs.ENSG00000131097.5	2	PRAD,KIRP
1	ENSG00000213654.8.vs.ENSG00000134317.16	1	PRAD
1	ENSG00000280179.1.vs.ENSG00000091583.9	1	STAD
1	ENSG00000077514.7.vs.ENSG00000136997.13	1	COAD
1	ENSG00000157827.18.vs.ENSG00000029534.18	1	BRCA
1	ENSG00000226819.1.vs.ENSG00000229314.5	1	HNSC
1	ENSG00000167910.3.vs.ENSG00000135077.7	1	STAD
1	ENSG00000169429.9.vs.ENSG00000228506.1	1	BRCA
1	ENSG00000279329.1.vs.ENSG00000108666.8	1	BRCA
1	ENSG00000198561.11.vs.ENSG00000253653.1	1	LIHC
1	ENSG00000138756.16.vs.ENSG00000161813.19	3	BLCA,HNSC,BRCA
1	ENSG00000183723.11.vs.ENSG00000007541.13	1	HNSC
1	ENSG00000110274.13.vs.ENSG00000221990.4	1	LUAD
1	ENSG00000273373.1.vs.ENSG00000197385.5	2	STAD,KIRC
1	ENSG00000178904.17.vs.ENSG00000275234.1	2	BRCA,THCA
1	ENSG00000217930.6.vs.ENSG00000154710.14	2	PRAD,COAD
1	ENSG00000092847.9.vs.ENSG00000231651.1	1	LUAD
1	ENSG00000011347.8.vs.ENSG00000073737.15	2	STAD,COAD
1	ENSG00000139132.13.vs.ENSG00000100197.19	1	LUAD
1	ENSG00000063015.18.vs.ENSG00000137166.13	1	LIHC
1	ENSG00000169895.5.vs.ENSG00000139330.5	1	STAD
1	ENSG00000104177.16.vs.ENSG00000186399.10	1	LUAD
1	ENSG00000272345.1.vs.ENSG00000145287.9	2	LUAD,PRAD
1	ENSG00000153930.9.vs.ENSG00000165376.9	1	BRCA
1	ENSG00000180921.6.vs.ENSG00000196188.9	1	KIRC
1	ENSG00000164944.10.vs.ENSG00000173542.7	3	LUAD,COAD,BRCA
1	ENSG00000168958.18.vs.ENSG00000123360.10	1	LUAD
1	ENSG00000105793.14.vs.ENSG00000245146.5	2	COAD,KIRC
1	ENSG00000156958.13.vs.ENSG00000254999.3	1	HNSC
1	ENSG00000241322.7.vs.ENSG00000081138.12	1	HNSC
1	ENSG00000108231.10.vs.ENSG00000234769.7	1	BRCA
1	ENSG00000166707.9.vs.ENSG00000100023.16	1	KIRP
1	ENSG00000185432.11.vs.ENSG00000099622.12	1	STAD
1	ENSG00000168412.6.vs.ENSG00000269609.4	1	COAD
1	ENSG00000271787.1.vs.ENSG00000166902.4	2	LUAD,KIRC
1	ENSG00000125875.12.vs.ENSG00000185112.5	1	LUAD
1	ENSG00000140564.9.vs.ENSG00000228150.1	1	THCA
1	ENSG00000234965.2.vs.ENSG00000187773.8	1	PRAD
1	ENSG00000175054.13.vs.ENSG00000162073.12	1	KIRC
1	ENSG00000124532.13.vs.ENSG00000012660.12	2	LUSC,BRCA
1	ENSG00000154783.9.vs.ENSG00000266921.1	1	THCA
1	ENSG00000076928.16.vs.ENSG00000183814.14	1	LIHC
1	ENSG00000179399.12.vs.ENSG00000261235.1	1	LIHC
1	ENSG00000151746.12.vs.ENSG00000104881.13	2	COAD,KIRC
1	ENSG00000253730.1.vs.ENSG00000188785.10	1	STAD
1	ENSG00000107625.11.vs.ENSG00000260352.1	1	LUAD
1	ENSG00000157703.14.vs.ENSG00000228192.6	1	LUAD
1	ENSG00000204438.9.vs.ENSG00000223552.1	1	LIHC
1	ENSG00000009950.14.vs.ENSG00000175899.13	1	STAD
1	ENSG00000197008.8.vs.ENSG00000224189.5	1	BRCA
1	ENSG00000136098.15.vs.ENSG00000259925.1	1	BRCA
1	ENSG00000142920.15.vs.ENSG00000163239.11	1	LUSC
1	ENSG00000176101.10.vs.ENSG00000151470.11	2	LUSC,BRCA
1	ENSG00000273170.4.vs.ENSG00000162526.6	1	LIHC
1	ENSG00000082438.14.vs.ENSG00000127585.10	1	LUSC
1	ENSG00000273419.1.vs.ENSG00000264175.1	2	LUSC,PRAD
1	ENSG00000121743.3.vs.ENSG00000248925.1	1	THCA
1	ENSG00000148965.7.vs.ENSG00000035664.10	1	COAD
1	ENSG00000068912.12.vs.ENSG00000257398.5	1	STAD
1	ENSG00000229848.1.vs.ENSG00000197217.11	1	STAD
1	ENSG00000131153.7.vs.ENSG00000167699.12	2	COAD,BRCA
1	ENSG00000131748.14.vs.ENSG00000131503.19	1	BRCA
1	ENSG00000170788.12.vs.ENSG00000125850.9	1	LUAD
1	ENSG00000124749.15.vs.ENSG00000236529.1	1	HNSC
1	ENSG00000184611.10.vs.ENSG00000162444.11	1	STAD
1	ENSG00000198276.12.vs.ENSG00000173209.21	2	LUAD,BRCA
1	ENSG00000068308.12.vs.ENSG00000159055.3	1	COAD
1	ENSG00000226696.4.vs.ENSG00000108932.10	4	LIHC,LUAD,HNSC,THCA
1	ENSG00000115091.10.vs.ENSG00000182329.9	1	COAD
1	ENSG00000157870.13.vs.ENSG00000226876.2	1	LUAD
1	ENSG00000133627.16.vs.ENSG00000100890.14	3	LIHC,LUSC,HNSC
1	ENSG00000267033.1.vs.ENSG00000162772.15	1	LUSC
1	ENSG00000276188.1.vs.ENSG00000162910.17	1	LIHC
1	ENSG00000118263.13.vs.ENSG00000237190.3	2	STAD,HNSC
1	ENSG00000054392.11.vs.ENSG00000236031.1	2	PRAD,BRCA
1	ENSG00000168036.15.vs.ENSG00000235688.1	1	HNSC
1	ENSG00000272636.3.vs.ENSG00000139946.8	1	THCA
1	ENSG00000074266.16.vs.ENSG00000128908.14	1	BRCA
1	ENSG00000257950.3.vs.ENSG00000267480.1	1	COAD
1	ENSG00000176715.14.vs.ENSG00000263345.1	1	HNSC
1	ENSG00000104221.11.vs.ENSG00000188486.3	1	LIHC
1	ENSG00000188313.11.vs.ENSG00000224531.5	1	HNSC
1	ENSG00000231064.4.vs.ENSG00000185112.5	1	LUAD
1	ENSG00000130635.14.vs.ENSG00000139211.6	2	STAD,HNSC
1	ENSG00000159176.12.vs.ENSG00000269242.1	1	BRCA
1	ENSG00000269420.4.vs.ENSG00000164112.11	1	BRCA
1	ENSG00000246022.2.vs.ENSG00000261603.1	1	STAD
1	ENSG00000155158.19.vs.ENSG00000206384.9	2	HNSC,KIRP
1	ENSG00000139722.5.vs.ENSG00000258738.1	1	PRAD
1	ENSG00000245017.2.vs.ENSG00000197380.9	1	STAD
1	ENSG00000173020.9.vs.ENSG00000113240.11	1	PRAD
1	ENSG00000185105.4.vs.ENSG00000196407.10	2	PRAD,HNSC
1	ENSG00000173221.12.vs.ENSG00000218052.5	1	LUSC
1	ENSG00000279342.1.vs.ENSG00000275665.1	1	BRCA
1	ENSG00000135404.10.vs.ENSG00000114784.3	1	KIRP
1	ENSG00000227359.1.vs.ENSG00000273036.2	1	KIRC
1	ENSG00000177938.4.vs.ENSG00000188242.4	1	BRCA
1	ENSG00000196535.13.vs.ENSG00000119801.11	2	PRAD,BRCA
1	ENSG00000153774.7.vs.ENSG00000125844.14	3	KIRP,BRCA,THCA
1	ENSG00000262482.1.vs.ENSG00000114270.14	2	LUAD,BRCA
1	ENSG00000251598.1.vs.ENSG00000088386.14	1	BLCA
1	ENSG00000100614.16.vs.ENSG00000230102.6	1	BRCA
1	ENSG00000198515.12.vs.ENSG00000124614.12	2	LIHC,HNSC
1	ENSG00000170369.3.vs.ENSG00000164458.8	2	BLCA,UCEC
1	ENSG00000174371.15.vs.ENSG00000180822.10	1	COAD
1	ENSG00000278828.1.vs.ENSG00000228701.1	1	LUSC
1	ENSG00000213920.7.vs.ENSG00000271745.1	1	BRCA
1	ENSG00000150893.10.vs.ENSG00000244694.6	1	COAD
1	ENSG00000154227.12.vs.ENSG00000187944.2	2	STAD,PRAD
1	ENSG00000138629.14.vs.ENSG00000271723.4	1	LUSC
1	ENSG00000115216.12.vs.ENSG00000125733.16	1	STAD
1	ENSG00000272115.1.vs.ENSG00000072364.11	1	BRCA
1	ENSG00000162613.15.vs.ENSG00000137168.7	1	BRCA
1	ENSG00000102977.12.vs.ENSG00000248771.4	2	STAD,COAD
1	ENSG00000157456.6.vs.ENSG00000226864.1	1	KIRC
1	ENSG00000088899.13.vs.ENSG00000247271.5	1	KIRC
1	ENSG00000139826.5.vs.ENSG00000198947.13	3	HNSC,KIRP,BRCA
1	ENSG00000130749.8.vs.ENSG00000239665.7	1	LIHC
1	ENSG00000205246.7.vs.ENSG00000234684.5	1	COAD
1	ENSG00000125734.12.vs.ENSG00000105732.11	1	BRCA
1	ENSG00000259066.4.vs.ENSG00000188707.5	1	COAD
1	ENSG00000089335.19.vs.ENSG00000248596.5	1	STAD
1	ENSG00000171703.15.vs.ENSG00000177663.12	1	BRCA
1	ENSG00000248668.2.vs.ENSG00000183066.13	1	BRCA
1	ENSG00000238755.3.vs.ENSG00000198715.10	1	KIRP
1	ENSG00000179673.4.vs.ENSG00000138780.13	2	BLCA,COAD
1	ENSG00000066583.10.vs.ENSG00000136943.9	2	STAD,KIRC
1	ENSG00000186827.9.vs.ENSG00000242866.8	2	LUAD,BRCA
1	ENSG00000169188.4.vs.ENSG00000186818.11	2	STAD,BLCA
1	ENSG00000187051.7.vs.ENSG00000155093.16	2	LUAD,PRAD
1	ENSG00000257557.2.vs.ENSG00000182504.9	1	KIRC
1	ENSG00000062716.9.vs.ENSG00000130701.3	1	HNSC
1	ENSG00000110395.4.vs.ENSG00000164465.17	1	STAD
1	ENSG00000008118.8.vs.ENSG00000204335.3	2	STAD,THCA
1	ENSG00000140009.17.vs.ENSG00000137393.9	1	STAD
1	ENSG00000224855.4.vs.ENSG00000124459.10	1	STAD
1	ENSG00000064547.12.vs.ENSG00000180357.8	1	LIHC
1	ENSG00000162571.12.vs.ENSG00000205544.3	1	LUAD
1	ENSG00000125657.4.vs.ENSG00000112739.15	1	LUSC
1	ENSG00000151790.7.vs.ENSG00000215251.3	1	KIRP
1	ENSG00000112290.11.vs.ENSG00000246560.2	1	BLCA
1	ENSG00000248475.4.vs.ENSG00000168079.15	1	STAD
1	ENSG00000188991.3.vs.ENSG00000204577.10	2	LUAD,BLCA
1	ENSG00000128710.5.vs.ENSG00000236255.1	1	COAD
1	ENSG00000258414.1.vs.ENSG00000094841.12	1	BRCA
1	ENSG00000125356.6.vs.ENSG00000251359.4	1	BRCA
1	ENSG00000235387.1.vs.ENSG00000272578.4	1	BRCA
1	ENSG00000151552.10.vs.ENSG00000260388.2	1	HNSC
1	ENSG00000197540.6.vs.ENSG00000081377.15	2	LUSC,COAD
1	ENSG00000226134.1.vs.ENSG00000178773.13	1	LUSC
1	ENSG00000141552.16.vs.ENSG00000134243.10	1	BLCA
1	ENSG00000108510.8.vs.ENSG00000122678.13	1	BRCA
1	ENSG00000179097.5.vs.ENSG00000119392.13	1	COAD
1	ENSG00000134594.4.vs.ENSG00000128203.6	2	LIHC,PRAD
1	ENSG00000104826.10.vs.ENSG00000204685.6	1	LIHC
1	ENSG00000231589.1.vs.ENSG00000019144.15	1	UCEC
1	ENSG00000168334.8.vs.ENSG00000162378.11	1	HNSC
10	ENSG00000197608.10.vs.ENSG00000204532.5	1	BLCA
10	ENSG00000110075.13.vs.ENSG00000065717.13	1	BRCA
10	ENSG00000143954.11.vs.ENSG00000167633.15	1	COAD
10	ENSG00000168137.14.vs.ENSG00000267002.1	1	STAD
10	ENSG00000213923.9.vs.ENSG00000171522.5	1	LUSC
10	ENSG00000275560.1.vs.ENSG00000157869.13	1	LUAD
10	ENSG00000100813.13.vs.ENSG00000172482.4	2	LIHC,STAD
10	ENSG00000169100.11.vs.ENSG00000279392.1	1	COAD
10	ENSG00000178803.9.vs.ENSG00000103375.9	1	THCA
10	ENSG00000155629.13.vs.ENSG00000115232.12	3	LIHC,COAD,BRCA
10	ENSG00000158747.12.vs.ENSG00000162302.11	3	LIHC,STAD,KIRC
10	ENSG00000204435.12.vs.ENSG00000031823.13	2	BRCA,THCA
10	ENSG00000155893.10.vs.ENSG00000186350.9	1	HNSC
10	ENSG00000069275.12.vs.ENSG00000259798.1	2	BLCA,KIRP
10	ENSG00000101367.8.vs.ENSG00000236064.1	1	LUAD
10	ENSG00000260367.2.vs.ENSG00000156206.12	2	KIRP,BRCA
10	ENSG00000001626.13.vs.ENSG00000163872.14	2	BLCA,HNSC
10	ENSG00000064651.12.vs.ENSG00000120533.11	1	LIHC
10	ENSG00000227331.1.vs.ENSG00000140600.15	2	STAD,UCEC
10	ENSG00000172554.10.vs.ENSG00000188869.11	1	PRAD
10	ENSG00000158104.10.vs.ENSG00000176402.5	1	PRAD
10	ENSG00000240207.5.vs.ENSG00000110801.12	1	BLCA
10	ENSG00000101311.14.vs.ENSG00000183662.9	1	STAD
10	ENSG00000226849.1.vs.ENSG00000163956.9	2	STAD,LUAD
10	ENSG00000224965.1.vs.ENSG00000157470.10	1	LUAD
10	ENSG00000165819.10.vs.ENSG00000233554.4	1	LIHC
10	ENSG00000167992.11.vs.ENSG00000075886.10	1	KIRC
10	ENSG00000253227.1.vs.ENSG00000268621.4	2	STAD,COAD
10	ENSG00000140832.8.vs.ENSG00000074755.13	2	LUAD,COAD
10	ENSG00000273920.1.vs.ENSG00000185640.5	2	STAD,LUSC
10	ENSG00000253931.1.vs.ENSG00000121871.3	1	HNSC
10	ENSG00000198677.9.vs.ENSG00000140285.8	1	LUAD
10	ENSG00000221838.8.vs.ENSG00000183230.15	2	STAD,PRAD
10	ENSG00000137074.17.vs.ENSG00000244041.6	2	COAD,BRCA
10	ENSG00000270765.4.vs.ENSG00000147799.10	1	UCEC
10	ENSG00000204362.5.vs.ENSG00000133943.19	1	HNSC
10	ENSG00000108379.8.vs.ENSG00000225126.1	1	BRCA
10	ENSG00000168824.13.vs.ENSG00000254777.4	1	BRCA
10	ENSG00000106628.9.vs.ENSG00000105879.10	2	COAD,KIRC
10	ENSG00000239002.3.vs.ENSG00000107020.8	1	PRAD
10	ENSG00000280927.1.vs.ENSG00000164418.18	1	LIHC
10	ENSG00000197712.10.vs.ENSG00000131910.4	1	THCA
10	ENSG00000087510.6.vs.ENSG00000178803.9	1	THCA
10	ENSG00000275549.1.vs.ENSG00000092051.15	1	HNSC
10	ENSG00000070371.14.vs.ENSG00000012983.10	1	BRCA
10	ENSG00000170775.2.vs.ENSG00000197013.8	2	STAD,PRAD
10	ENSG00000214013.8.vs.ENSG00000127561.13	1	BRCA
10	ENSG00000100365.13.vs.ENSG00000106443.13	1	LIHC
10	ENSG00000264608.1.vs.ENSG00000235899.1	1	LUSC
10	ENSG00000181873.11.vs.ENSG00000272975.1	3	HNSC,KIRC,BRCA
10	ENSG00000149346.13.vs.ENSG00000074800.12	1	PRAD
10	ENSG00000249684.4.vs.ENSG00000100697.13	2	STAD,UCEC
10	ENSG00000251603.1.vs.ENSG00000185760.14	1	PRAD
10	ENSG00000070961.13.vs.ENSG00000100902.9	1	BLCA
10	ENSG00000281398.1.vs.ENSG00000122254.6	1	HNSC
10	ENSG00000172765.15.vs.ENSG00000110079.15	1	BRCA
10	ENSG00000188211.7.vs.ENSG00000152932.7	1	COAD
10	ENSG00000129566.11.vs.ENSG00000207175.1	1	BRCA
10	ENSG00000182132.11.vs.ENSG00000227053.1	1	LIHC
10	ENSG00000148702.13.vs.ENSG00000179195.14	1	KIRP
10	ENSG00000264006.5.vs.ENSG00000235300.4	1	STAD
10	ENSG00000214999.3.vs.ENSG00000137726.14	1	LUSC
10	ENSG00000181291.5.vs.ENSG00000260418.1	1	BLCA
10	ENSG00000228027.1.vs.ENSG00000277075.1	1	LUAD
10	ENSG00000135744.7.vs.ENSG00000145708.9	1	PRAD
10	ENSG00000249825.4.vs.ENSG00000116954.7	2	LUAD,HNSC
10	ENSG00000086159.11.vs.ENSG00000159197.3	1	HNSC
10	ENSG00000254815.4.vs.ENSG00000118898.14	3	BLCA,KIRC,BRCA
10	ENSG00000125257.12.vs.ENSG00000165914.13	2	PRAD,HNSC
10	ENSG00000278967.1.vs.ENSG00000156009.8	1	STAD
10	ENSG00000165152.7.vs.ENSG00000126709.13	1	PRAD
10	ENSG00000235373.1.vs.ENSG00000259264.4	1	PRAD
10	ENSG00000071553.15.vs.ENSG00000249916.1	1	BRCA
10	ENSG00000246130.1.vs.ENSG00000160951.3	1	BRCA
10	ENSG00000167315.16.vs.ENSG00000139433.8	1	THCA
10	ENSG00000142273.9.vs.ENSG00000146376.9	1	STAD
10	ENSG00000122778.8.vs.ENSG00000165475.12	1	COAD
10	ENSG00000227039.5.vs.ENSG00000215252.10	2	STAD,KIRP
10	ENSG00000139220.15.vs.ENSG00000132323.7	1	KIRP
10	ENSG00000160013.7.vs.ENSG00000181789.13	1	THCA
10	ENSG00000155849.14.vs.ENSG00000242419.4	1	LIHC
10	ENSG00000123562.15.vs.ENSG00000279365.1	1	STAD
10	ENSG00000094804.8.vs.ENSG00000228382.1	1	LUAD
10	ENSG00000165821.10.vs.ENSG00000135931.16	1	KIRP
10	ENSG00000204272.9.vs.ENSG00000184611.10	1	LIHC
10	ENSG00000126733.19.vs.ENSG00000059145.17	1	KIRC
10	ENSG00000102543.13.vs.ENSG00000169330.7	2	LIHC,LUSC
10	ENSG00000236268.4.vs.ENSG00000144451.17	1	STAD
10	ENSG00000179362.13.vs.ENSG00000240764.3	1	BLCA
10	ENSG00000060339.12.vs.ENSG00000279345.1	1	LIHC
10	ENSG00000132128.15.vs.ENSG00000108654.10	2	LUAD,KIRC
10	ENSG00000106635.6.vs.ENSG00000257315.1	1	LUSC
10	ENSG00000138735.14.vs.ENSG00000101247.16	3	STAD,PRAD,COAD
10	ENSG00000203808.9.vs.ENSG00000267694.1	1	BRCA
10	ENSG00000273619.1.vs.ENSG00000269586.6	3	STAD,LUAD,LUSC
10	ENSG00000118596.10.vs.ENSG00000259515.1	1	HNSC
10	ENSG00000236540.6.vs.ENSG00000272573.4	2	LIHC,BLCA
10	ENSG00000143493.11.vs.ENSG00000134594.4	2	LUAD,HNSC
10	ENSG00000225931.3.vs.ENSG00000129235.9	1	BRCA
10	ENSG00000120370.11.vs.ENSG00000250565.5	1	LUSC
10	ENSG00000171246.5.vs.ENSG00000179818.12	2	KIRC,KIRP
10	ENSG00000204628.10.vs.ENSG00000183559.10	1	UCEC
10	ENSG00000102221.12.vs.ENSG00000174574.14	1	KIRP
10	ENSG00000267414.1.vs.ENSG00000119535.16	1	PRAD
10	ENSG00000235162.7.vs.ENSG00000183828.13	1	LIHC
10	ENSG00000232978.2.vs.ENSG00000170027.6	1	STAD
10	ENSG00000152484.12.vs.ENSG00000005436.12	1	LUSC
10	ENSG00000161638.9.vs.ENSG00000274026.1	3	PRAD,HNSC,KIRC
10	ENSG00000175697.9.vs.ENSG00000276488.1	1	BRCA
10	ENSG00000273297.1.vs.ENSG00000134533.5	1	LUAD
10	ENSG00000185650.9.vs.ENSG00000137478.13	1	LIHC
10	ENSG00000137745.10.vs.ENSG00000102189.15	1	STAD
10	ENSG00000183597.14.vs.ENSG00000270168.1	2	STAD,BRCA
10	ENSG00000103035.9.vs.ENSG00000055957.9	1	LUSC
10	ENSG00000273611.3.vs.ENSG00000227527.2	1	BRCA
10	ENSG00000159307.17.vs.ENSG00000236064.1	1	KIRC
10	ENSG00000102034.15.vs.ENSG00000166855.8	1	HNSC
10	ENSG00000187994.12.vs.ENSG00000135406.12	1	LIHC
10	ENSG00000161956.11.vs.ENSG00000111678.9	3	STAD,PRAD,THCA
10	ENSG00000156469.7.vs.ENSG00000237436.1	1	LUAD
10	ENSG00000227620.4.vs.ENSG00000214439.3	2	LUAD,COAD
10	ENSG00000137628.15.vs.ENSG00000187242.4	2	STAD,BRCA
10	ENSG00000249494.4.vs.ENSG00000253910.2	1	THCA
10	ENSG00000135083.13.vs.ENSG00000268278.1	1	LIHC
10	ENSG00000253824.1.vs.ENSG00000101892.10	1	HNSC
10	ENSG00000198821.9.vs.ENSG00000064726.8	2	LIHC,HNSC
10	ENSG00000169155.8.vs.ENSG00000164292.11	1	LIHC
10	ENSG00000267152.1.vs.ENSG00000264772.4	1	LIHC
10	ENSG00000119969.13.vs.ENSG00000273473.1	4	LIHC,LUSC,BLCA,COAD
10	ENSG00000260017.1.vs.ENSG00000184661.12	1	STAD
10	ENSG00000235687.7.vs.ENSG00000117713.16	1	BRCA
10	ENSG00000168734.12.vs.ENSG00000170624.12	3	STAD,PRAD,THCA
10	ENSG00000224652.1.vs.ENSG00000039650.8	1	STAD
10	ENSG00000100156.9.vs.ENSG00000157103.9	2	PRAD,HNSC
10	ENSG00000167046.4.vs.ENSG00000104783.10	1	HNSC
10	ENSG00000236104.2.vs.ENSG00000280429.1	1	PRAD
10	ENSG00000005238.18.vs.ENSG00000159871.13	1	STAD
10	ENSG00000164610.7.vs.ENSG00000231518.1	1	LUAD
10	ENSG00000162194.11.vs.ENSG00000171847.9	2	HNSC,KIRP
10	ENSG00000214413.6.vs.ENSG00000160396.8	1	PRAD
10	ENSG00000165171.9.vs.ENSG00000236658.1	2	STAD,COAD
10	ENSG00000116032.5.vs.ENSG00000136381.11	2	LIHC,BRCA
10	ENSG00000173809.14.vs.ENSG00000227719.1	2	LIHC,KIRP
10	ENSG00000158716.7.vs.ENSG00000231721.5	1	LUSC
10	ENSG00000261408.4.vs.ENSG00000167702.10	2	HNSC,KIRP
10	ENSG00000116260.15.vs.ENSG00000041880.13	1	LIHC
10	ENSG00000173535.12.vs.ENSG00000163527.8	2	COAD,HNSC
10	ENSG00000163873.8.vs.ENSG00000223774.4	1	PRAD
10	ENSG00000210112.1.vs.ENSG00000167969.11	1	LIHC
10	ENSG00000171804.8.vs.ENSG00000235848.3	1	BRCA
10	ENSG00000130066.15.vs.ENSG00000256463.7	1	THCA
10	ENSG00000276488.1.vs.ENSG00000066739.10	2	LIHC,UCEC
10	ENSG00000176619.9.vs.ENSG00000260634.1	1	KIRC
10	ENSG00000221818.7.vs.ENSG00000066336.10	2	LUAD,BRCA
10	ENSG00000134884.12.vs.ENSG00000255346.8	1	PRAD
10	ENSG00000169057.18.vs.ENSG00000104408.8	1	STAD
10	ENSG00000253295.1.vs.ENSG00000183397.5	1	LUAD
10	ENSG00000158796.15.vs.ENSG00000116209.10	2	LUSC,BRCA
10	ENSG00000255910.1.vs.ENSG00000224383.6	1	STAD
10	ENSG00000086967.9.vs.ENSG00000160282.12	1	STAD
10	ENSG00000144057.14.vs.ENSG00000100316.14	1	HNSC
10	ENSG00000125798.13.vs.ENSG00000232759.1	1	STAD
10	ENSG00000188070.9.vs.ENSG00000163995.17	2	STAD,PRAD
10	ENSG00000254929.5.vs.ENSG00000167034.9	1	BRCA
10	ENSG00000174292.11.vs.ENSG00000198829.6	2	LUAD,COAD
10	ENSG00000167244.16.vs.ENSG00000198336.8	2	COAD,BRCA
10	ENSG00000267016.1.vs.ENSG00000135414.8	1	STAD
10	ENSG00000232807.2.vs.ENSG00000196141.11	1	STAD
10	ENSG00000247809.6.vs.ENSG00000162188.5	1	BRCA
10	ENSG00000215915.8.vs.ENSG00000101883.4	1	UCEC
10	ENSG00000147471.10.vs.ENSG00000271715.1	1	LUAD
10	ENSG00000116299.15.vs.ENSG00000181171.5	1	STAD
10	ENSG00000147145.11.vs.ENSG00000274307.1	1	STAD
10	ENSG00000204661.8.vs.ENSG00000114270.14	1	LUAD
10	ENSG00000157483.7.vs.ENSG00000101049.13	1	COAD
10	ENSG00000262874.1.vs.ENSG00000157020.16	1	STAD
10	ENSG00000274227.1.vs.ENSG00000268750.5	1	LIHC
10	ENSG00000280200.1.vs.ENSG00000171368.11	1	LUSC
10	ENSG00000160716.4.vs.ENSG00000138617.13	2	LUAD,BRCA
10	ENSG00000180644.6.vs.ENSG00000179772.7	1	LUSC
10	ENSG00000160447.6.vs.ENSG00000092607.12	1	PRAD
10	ENSG00000122585.6.vs.ENSG00000164749.10	1	STAD
10	ENSG00000141232.4.vs.ENSG00000167693.15	2	PRAD,UCEC
10	ENSG00000145882.9.vs.ENSG00000277011.1	1	UCEC
10	ENSG00000263316.1.vs.ENSG00000182798.9	1	STAD
10	ENSG00000232956.7.vs.ENSG00000226180.3	1	LIHC
10	ENSG00000258793.1.vs.ENSG00000181788.3	1	HNSC
10	ENSG00000157540.18.vs.ENSG00000105290.10	1	STAD
10	ENSG00000101842.12.vs.ENSG00000134815.17	1	HNSC
10	ENSG00000180801.12.vs.ENSG00000110934.9	2	LIHC,THCA
10	ENSG00000245910.7.vs.ENSG00000086205.15	1	BRCA
10	ENSG00000215068.6.vs.ENSG00000165832.5	2	COAD,BRCA
10	ENSG00000164190.15.vs.ENSG00000143603.17	1	BRCA
10	ENSG00000092036.15.vs.ENSG00000182472.7	2	HNSC,BRCA
10	ENSG00000165633.11.vs.ENSG00000112214.9	2	STAD,PRAD
10	ENSG00000180089.5.vs.ENSG00000196150.12	2	PRAD,BRCA
10	ENSG00000221867.7.vs.ENSG00000232300.1	1	STAD
10	ENSG00000218672.1.vs.ENSG00000131323.13	1	PRAD
10	ENSG00000267166.4.vs.ENSG00000166104.13	2	STAD,BRCA
10	ENSG00000267199.1.vs.ENSG00000140807.5	1	COAD
10	ENSG00000006756.14.vs.ENSG00000166592.10	2	STAD,THCA
10	ENSG00000260804.3.vs.ENSG00000196497.14	1	LUAD
10	ENSG00000100294.11.vs.ENSG00000102575.9	1	KIRP
10	ENSG00000102595.17.vs.ENSG00000223725.5	1	BRCA
10	ENSG00000235563.1.vs.ENSG00000206077.9	1	LIHC
10	ENSG00000186487.16.vs.ENSG00000141759.13	1	STAD
10	ENSG00000112983.16.vs.ENSG00000053108.15	1	THCA
10	ENSG00000162733.15.vs.ENSG00000198610.9	1	STAD
10	ENSG00000184465.14.vs.ENSG00000159184.7	1	KIRP
10	ENSG00000080608.9.vs.ENSG00000159899.13	1	LUSC
10	ENSG00000104432.11.vs.ENSG00000253528.2	1	KIRP
10	ENSG00000137691.11.vs.ENSG00000107164.15	1	UCEC
10	ENSG00000119669.4.vs.ENSG00000280061.1	1	PRAD
10	ENSG00000259332.2.vs.ENSG00000102098.16	1	LUAD
10	ENSG00000006712.13.vs.ENSG00000119979.14	1	BRCA
10	ENSG00000196437.9.vs.ENSG00000129009.11	1	PRAD
10	ENSG00000249242.6.vs.ENSG00000177697.16	2	LIHC,COAD
10	ENSG00000080200.8.vs.ENSG00000160439.14	2	HNSC,BRCA
10	ENSG00000014164.6.vs.ENSG00000198440.8	1	BRCA
10	ENSG00000153113.22.vs.ENSG00000138435.13	1	BLCA
10	ENSG00000166169.15.vs.ENSG00000272076.1	1	BLCA
10	ENSG00000253213.1.vs.ENSG00000281706.1	1	BLCA
10	ENSG00000186529.13.vs.ENSG00000167807.14	2	LUSC,COAD
10	ENSG00000280374.1.vs.ENSG00000261460.1	1	LUSC
10	ENSG00000140829.10.vs.ENSG00000110013.11	2	STAD,PRAD
10	ENSG00000095627.8.vs.ENSG00000087299.10	2	COAD,UCEC
10	ENSG00000135111.13.vs.ENSG00000214050.6	1	COAD
10	ENSG00000182327.7.vs.ENSG00000167580.6	3	STAD,PRAD,KIRC
10	ENSG00000105122.11.vs.ENSG00000126749.13	1	LUSC
10	ENSG00000278705.1.vs.ENSG00000138180.14	1	LUAD
10	ENSG00000280550.1.vs.ENSG00000177374.11	2	STAD,PRAD
10	ENSG00000266921.1.vs.ENSG00000116560.9	1	LIHC
10	ENSG00000172250.13.vs.ENSG00000224689.6	1	STAD
10	ENSG00000186074.17.vs.ENSG00000175826.10	1	HNSC
10	ENSG00000154803.11.vs.ENSG00000226314.6	1	KIRC
10	ENSG00000162813.16.vs.ENSG00000259774.1	1	LUAD
10	ENSG00000183010.15.vs.ENSG00000136999.4	2	LUAD,THCA
10	ENSG00000168306.11.vs.ENSG00000259649.3	2	STAD,BRCA
10	ENSG00000139793.17.vs.ENSG00000240871.4	1	UCEC
10	ENSG00000142082.13.vs.ENSG00000081059.18	1	LUSC
10	ENSG00000183605.15.vs.ENSG00000226245.1	2	BRCA,UCEC
10	ENSG00000158156.7.vs.ENSG00000186431.17	2	LUAD,LUSC
10	ENSG00000221994.9.vs.ENSG00000165775.16	2	STAD,BLCA
10	ENSG00000171219.8.vs.ENSG00000189334.7	4	LIHC,PRAD,COAD,THCA
10	ENSG00000184613.9.vs.ENSG00000004534.13	2	STAD,COAD
10	ENSG00000167258.12.vs.ENSG00000233175.2	1	BLCA
10	ENSG00000259471.1.vs.ENSG00000168334.8	1	STAD
10	ENSG00000105246.5.vs.ENSG00000133606.9	1	LIHC
10	ENSG00000115392.10.vs.ENSG00000254614.2	1	HNSC
10	ENSG00000173065.12.vs.ENSG00000276251.1	1	BRCA
10	ENSG00000224066.1.vs.ENSG00000112715.19	4	LIHC,LUAD,PRAD,KIRP
10	ENSG00000170549.3.vs.ENSG00000228288.5	2	STAD,HNSC
10	ENSG00000185475.7.vs.ENSG00000184445.10	2	LUSC,PRAD
10	ENSG00000261603.1.vs.ENSG00000173372.15	1	LIHC
10	ENSG00000165495.14.vs.ENSG00000271730.1	1	LIHC
10	ENSG00000078900.13.vs.ENSG00000167074.13	2	LUSC,BRCA
10	ENSG00000154864.10.vs.ENSG00000064300.7	1	LIHC
10	ENSG00000214900.7.vs.ENSG00000228594.3	1	HNSC
10	ENSG00000149970.13.vs.ENSG00000111615.11	1	KIRP
10	ENSG00000075292.17.vs.ENSG00000197128.10	1	LUSC
10	ENSG00000264177.1.vs.ENSG00000168300.12	1	HNSC
10	ENSG00000278090.1.vs.ENSG00000088256.7	1	COAD
10	ENSG00000260267.1.vs.ENSG00000198951.10	2	LIHC,BRCA
10	ENSG00000116176.6.vs.ENSG00000198242.12	1	KIRP
10	ENSG00000170837.2.vs.ENSG00000257225.1	1	STAD
10	ENSG00000173511.8.vs.ENSG00000115956.9	1	LIHC
10	ENSG00000113811.9.vs.ENSG00000121318.2	1	STAD
10	ENSG00000159314.10.vs.ENSG00000189367.13	2	STAD,LUAD
10	ENSG00000013619.12.vs.ENSG00000167851.12	3	LUAD,COAD,HNSC
10	ENSG00000243224.1.vs.ENSG00000197586.11	1	COAD
10	ENSG00000189292.14.vs.ENSG00000102078.14	1	HNSC
10	ENSG00000168930.12.vs.ENSG00000196511.12	1	UCEC
10	ENSG00000162976.11.vs.ENSG00000256690.1	1	BRCA
10	ENSG00000273254.1.vs.ENSG00000143294.13	1	STAD
10	ENSG00000249898.6.vs.ENSG00000132388.11	2	LUAD,COAD
10	ENSG00000244482.8.vs.ENSG00000233369.6	2	STAD,COAD
10	ENSG00000260645.1.vs.ENSG00000138823.11	1	LIHC
10	ENSG00000167515.9.vs.ENSG00000102796.9	2	LUAD,PRAD
10	ENSG00000119508.16.vs.ENSG00000142669.12	1	BRCA
10	ENSG00000127364.3.vs.ENSG00000176732.6	1	LUAD
10	ENSG00000122705.15.vs.ENSG00000187479.5	1	STAD
10	ENSG00000229967.1.vs.ENSG00000155115.6	1	COAD
10	ENSG00000229312.2.vs.ENSG00000136240.8	3	LIHC,COAD,HNSC
10	ENSG00000130749.8.vs.ENSG00000271659.1	2	LUSC,BLCA
10	ENSG00000246263.2.vs.ENSG00000221890.2	1	LIHC
10	ENSG00000051180.15.vs.ENSG00000163608.13	1	KIRC
10	ENSG00000205726.12.vs.ENSG00000089818.15	1	LIHC
10	ENSG00000277728.1.vs.ENSG00000185219.14	1	STAD
10	ENSG00000139988.8.vs.ENSG00000166405.13	2	STAD,LUSC
10	ENSG00000163219.10.vs.ENSG00000189403.13	1	HNSC
10	ENSG00000231749.2.vs.ENSG00000214711.8	1	HNSC
10	ENSG00000260063.1.vs.ENSG00000132854.17	1	STAD
10	ENSG00000102054.16.vs.ENSG00000197226.11	1	BRCA
10	ENSG00000130935.8.vs.ENSG00000243368.2	1	STAD
10	ENSG00000167182.12.vs.ENSG00000186469.7	2	LIHC,COAD
10	ENSG00000256654.2.vs.ENSG00000257086.1	1	HNSC
10	ENSG00000225762.1.vs.ENSG00000236045.1	1	BRCA
10	ENSG00000154678.15.vs.ENSG00000077092.17	1	STAD
10	ENSG00000167543.14.vs.ENSG00000142621.18	1	KIRC
10	ENSG00000237886.1.vs.ENSG00000197901.10	1	KIRC
10	ENSG00000130402.10.vs.ENSG00000101460.11	1	STAD
10	ENSG00000265975.1.vs.ENSG00000145908.11	1	LUAD
10	ENSG00000197380.9.vs.ENSG00000103275.17	2	STAD,BRCA
10	ENSG00000185247.13.vs.ENSG00000230982.1	1	LIHC
10	ENSG00000128965.10.vs.ENSG00000244752.2	1	COAD
10	ENSG00000258875.4.vs.ENSG00000258839.2	1	HNSC
10	ENSG00000108840.14.vs.ENSG00000122042.9	1	COAD
10	ENSG00000054938.14.vs.ENSG00000086475.13	1	STAD
10	ENSG00000116132.10.vs.ENSG00000260790.1	1	STAD
10	ENSG00000100802.13.vs.ENSG00000253773.2	1	LUAD
10	ENSG00000250131.1.vs.ENSG00000151575.13	2	LUAD,BRCA
10	ENSG00000100359.19.vs.ENSG00000164930.10	1	LUAD
10	ENSG00000264538.5.vs.ENSG00000273487.1	1	KIRP
10	ENSG00000066422.4.vs.ENSG00000265808.3	1	BLCA
10	ENSG00000155629.13.vs.ENSG00000006016.9	2	LIHC,PRAD
10	ENSG00000162129.11.vs.ENSG00000175395.14	2	BLCA,KIRC
10	ENSG00000267607.1.vs.ENSG00000089101.16	2	KIRC,UCEC
10	ENSG00000259056.1.vs.ENSG00000171365.14	1	STAD
10	ENSG00000272498.1.vs.ENSG00000109381.18	1	STAD
10	ENSG00000102103.14.vs.ENSG00000178826.9	1	STAD
10	ENSG00000142606.14.vs.ENSG00000129055.11	1	KIRC
10	ENSG00000261373.1.vs.ENSG00000226624.1	1	BRCA
10	ENSG00000224885.1.vs.ENSG00000233342.1	1	HNSC
10	ENSG00000125870.9.vs.ENSG00000257167.2	2	KIRC,KIRP
10	ENSG00000018610.12.vs.ENSG00000132669.11	1	STAD
10	ENSG00000171174.12.vs.ENSG00000183032.9	1	PRAD
10	ENSG00000188486.3.vs.ENSG00000133316.14	3	LUAD,LUSC,THCA
10	ENSG00000139567.11.vs.ENSG00000197969.10	2	STAD,PRAD
10	ENSG00000128191.12.vs.ENSG00000164078.11	1	COAD
10	ENSG00000234311.1.vs.ENSG00000113161.14	2	STAD,COAD
10	ENSG00000186918.12.vs.ENSG00000161021.10	1	HNSC
10	ENSG00000189403.13.vs.ENSG00000260929.1	1	COAD
10	ENSG00000265393.1.vs.ENSG00000170421.10	2	COAD,KIRC
10	ENSG00000060718.17.vs.ENSG00000261616.1	1	STAD
10	ENSG00000173114.11.vs.ENSG00000078902.14	1	LUAD
10	ENSG00000273160.1.vs.ENSG00000149571.9	1	LUAD
10	ENSG00000271797.1.vs.ENSG00000144136.9	1	STAD
10	ENSG00000231646.4.vs.ENSG00000172061.8	1	HNSC
10	ENSG00000241163.6.vs.ENSG00000205959.3	2	STAD,LUAD
10	ENSG00000175893.10.vs.ENSG00000274602.3	1	LUAD
10	ENSG00000158122.10.vs.ENSG00000259867.4	1	STAD
10	ENSG00000054611.12.vs.ENSG00000126790.10	1	BRCA
10	ENSG00000186648.13.vs.ENSG00000124217.4	1	BRCA
10	ENSG00000004848.6.vs.ENSG00000172955.16	1	UCEC
10	ENSG00000113296.13.vs.ENSG00000244300.2	2	LUAD,THCA
10	ENSG00000275066.3.vs.ENSG00000108107.11	1	BRCA
10	ENSG00000107485.14.vs.ENSG00000116478.10	1	LUSC
10	ENSG00000120509.9.vs.ENSG00000008324.9	1	BRCA
10	ENSG00000122679.7.vs.ENSG00000271828.1	1	PRAD
10	ENSG00000105612.7.vs.ENSG00000279424.1	1	PRAD
10	ENSG00000161509.12.vs.ENSG00000197372.8	2	STAD,UCEC
10	ENSG00000078804.11.vs.ENSG00000100418.7	2	LIHC,KIRC
10	ENSG00000198883.10.vs.ENSG00000106571.11	1	LIHC
10	ENSG00000104826.10.vs.ENSG00000267122.1	1	HNSC
10	ENSG00000250343.1.vs.ENSG00000114126.16	1	STAD
10	ENSG00000251279.1.vs.ENSG00000126970.14	1	BRCA
10	ENSG00000185811.15.vs.ENSG00000237886.1	1	THCA
10	ENSG00000164393.7.vs.ENSG00000186193.8	1	LUAD
10	ENSG00000172456.15.vs.ENSG00000273305.1	1	KIRC
10	ENSG00000171345.12.vs.ENSG00000103264.14	2	STAD,LUAD
10	ENSG00000163444.10.vs.ENSG00000257698.1	1	LUAD
10	ENSG00000141437.8.vs.ENSG00000121335.11	1	STAD
10	ENSG00000068079.6.vs.ENSG00000175556.15	2	STAD,PRAD
10	ENSG00000198887.8.vs.ENSG00000010610.8	1	COAD
10	ENSG00000234949.2.vs.ENSG00000125449.5	3	LIHC,LUAD,BLCA
10	ENSG00000205361.7.vs.ENSG00000170276.5	1	BRCA
10	ENSG00000148291.8.vs.ENSG00000175564.11	3	LIHC,COAD,UCEC
10	ENSG00000137814.8.vs.ENSG00000243660.8	1	STAD
10	ENSG00000261884.2.vs.ENSG00000112379.8	1	LIHC
10	ENSG00000130592.12.vs.ENSG00000177125.5	2	LUSC,PRAD
10	ENSG00000232973.10.vs.ENSG00000133816.12	1	KIRC
10	ENSG00000128581.14.vs.ENSG00000211445.10	1	UCEC
10	ENSG00000267284.1.vs.ENSG00000155463.11	1	STAD
10	ENSG00000198911.10.vs.ENSG00000132000.10	1	BRCA
10	ENSG00000086598.9.vs.ENSG00000164077.12	1	LUSC
10	ENSG00000162650.14.vs.ENSG00000237883.1	1	LIHC
10	ENSG00000145349.15.vs.ENSG00000198171.11	1	LIHC
10	ENSG00000173145.10.vs.ENSG00000197557.6	1	BRCA
10	ENSG00000197587.9.vs.ENSG00000124074.10	2	HNSC,BRCA
10	ENSG00000166136.14.vs.ENSG00000222001.2	1	LUAD
10	ENSG00000259540.1.vs.ENSG00000063127.14	1	STAD
10	ENSG00000104081.12.vs.ENSG00000184163.3	1	COAD
10	ENSG00000198315.9.vs.ENSG00000153234.12	2	STAD,LUAD
10	ENSG00000151665.11.vs.ENSG00000164691.15	1	LIHC
10	ENSG00000178171.9.vs.ENSG00000106605.9	1	PRAD
10	ENSG00000109063.13.vs.ENSG00000259362.2	2	STAD,KIRC
10	ENSG00000260066.1.vs.ENSG00000141736.12	1	HNSC
10	ENSG00000183166.9.vs.ENSG00000113597.16	1	LUAD
10	ENSG00000109436.7.vs.ENSG00000236017.6	1	PRAD
10	ENSG00000136842.12.vs.ENSG00000136986.8	1	UCEC
10	ENSG00000198133.7.vs.ENSG00000113300.10	1	LUSC
10	ENSG00000095110.6.vs.ENSG00000101220.16	2	STAD,COAD
10	ENSG00000224982.3.vs.ENSG00000204969.6	2	LUAD,THCA
10	ENSG00000273474.1.vs.ENSG00000130881.12	1	LIHC
10	ENSG00000072682.17.vs.ENSG00000225328.1	1	COAD
10	ENSG00000146085.7.vs.ENSG00000117713.16	1	BRCA
10	ENSG00000203952.8.vs.ENSG00000204682.5	1	THCA
10	ENSG00000179271.2.vs.ENSG00000213366.11	1	BRCA
10	ENSG00000126883.15.vs.ENSG00000274653.1	1	PRAD
10	ENSG00000100360.13.vs.ENSG00000144840.7	1	THCA
10	ENSG00000273155.1.vs.ENSG00000154065.15	1	BRCA
10	ENSG00000004142.10.vs.ENSG00000276488.1	1	BRCA
10	ENSG00000172031.6.vs.ENSG00000167798.15	1	STAD
10	ENSG00000085185.14.vs.ENSG00000085999.10	2	PRAD,COAD
10	ENSG00000151065.12.vs.ENSG00000175792.10	1	HNSC
10	ENSG00000236861.5.vs.ENSG00000231107.1	1	LUSC
10	ENSG00000085491.14.vs.ENSG00000105849.5	1	STAD
10	ENSG00000139998.13.vs.ENSG00000112782.14	4	LIHC,STAD,LUAD,COAD
10	ENSG00000177192.12.vs.ENSG00000132535.17	1	COAD
10	ENSG00000099864.16.vs.ENSG00000162493.15	1	THCA
10	ENSG00000134905.15.vs.ENSG00000224853.1	1	LUSC
10	ENSG00000197106.6.vs.ENSG00000145063.13	1	HNSC
10	ENSG00000185262.8.vs.ENSG00000040731.9	1	PRAD
10	ENSG00000139549.2.vs.ENSG00000010319.5	3	PRAD,BRCA,THCA
10	ENSG00000075142.12.vs.ENSG00000160188.8	4	STAD,LUAD,KIRC,UCEC
10	ENSG00000070269.12.vs.ENSG00000110104.10	1	PRAD
10	ENSG00000276529.1.vs.ENSG00000237513.1	1	BRCA
10	ENSG00000230131.4.vs.ENSG00000231527.4	1	COAD
10	ENSG00000187634.9.vs.ENSG00000269898.1	1	THCA
10	ENSG00000268601.1.vs.ENSG00000077463.13	1	STAD
10	ENSG00000280255.1.vs.ENSG00000143952.18	1	PRAD
10	ENSG00000116704.7.vs.ENSG00000276842.1	1	BLCA
10	ENSG00000114993.14.vs.ENSG00000228801.5	3	PRAD,BLCA,KIRC
10	ENSG00000112293.13.vs.ENSG00000204304.10	1	STAD
10	ENSG00000054690.12.vs.ENSG00000157764.11	1	BLCA
10	ENSG00000127616.16.vs.ENSG00000234945.6	1	LUSC
10	ENSG00000272909.1.vs.ENSG00000248993.1	1	PRAD
10	ENSG00000128309.15.vs.ENSG00000106477.17	2	STAD,UCEC
10	ENSG00000267405.1.vs.ENSG00000132510.9	1	KIRC
10	ENSG00000117868.14.vs.ENSG00000129596.4	1	BRCA
10	ENSG00000164323.11.vs.ENSG00000253731.2	1	STAD
10	ENSG00000188647.11.vs.ENSG00000130768.13	1	BLCA
10	ENSG00000125571.8.vs.ENSG00000187609.14	1	STAD
10	ENSG00000136279.17.vs.ENSG00000136279.17	1	LIHC
10	ENSG00000187860.9.vs.ENSG00000198910.11	2	LIHC,COAD
10	ENSG00000166169.15.vs.ENSG00000188112.7	1	BLCA
10	ENSG00000173706.11.vs.ENSG00000131381.11	1	LIHC
10	ENSG00000159905.13.vs.ENSG00000171365.14	2	LIHC,KIRP
10	ENSG00000226659.1.vs.ENSG00000188167.7	1	BRCA
10	ENSG00000115761.14.vs.ENSG00000159625.13	1	PRAD
10	ENSG00000136045.10.vs.ENSG00000178381.10	1	UCEC
10	ENSG00000137814.8.vs.ENSG00000226777.6	1	PRAD
10	ENSG00000135773.11.vs.ENSG00000214753.2	1	LUAD
10	ENSG00000142494.12.vs.ENSG00000279653.1	1	LUSC
10	ENSG00000227214.2.vs.ENSG00000006625.16	1	BRCA
10	ENSG00000160993.3.vs.ENSG00000175336.9	2	LUAD,COAD
10	ENSG00000175224.15.vs.ENSG00000036473.6	1	LUAD
10	ENSG00000173212.4.vs.ENSG00000123908.10	1	COAD
10	ENSG00000205420.9.vs.ENSG00000270571.2	1	COAD
10	ENSG00000214870.7.vs.ENSG00000137628.15	1	STAD
10	ENSG00000263089.1.vs.ENSG00000135220.9	1	LUAD
10	ENSG00000066583.10.vs.ENSG00000135049.14	2	LUAD,COAD
10	ENSG00000214753.2.vs.ENSG00000100121.11	1	LUAD
10	ENSG00000048342.14.vs.ENSG00000139737.20	2	BRCA,UCEC
10	ENSG00000146007.9.vs.ENSG00000103168.15	1	LUAD
10	ENSG00000099381.15.vs.ENSG00000149925.15	2	LIHC,BRCA
10	ENSG00000117151.11.vs.ENSG00000115594.10	1	BRCA
10	ENSG00000134504.11.vs.ENSG00000165046.11	1	PRAD
10	ENSG00000262874.1.vs.ENSG00000214772.2	1	LUSC
10	ENSG00000254535.3.vs.ENSG00000196074.11	2	BRCA,UCEC
10	ENSG00000140525.16.vs.ENSG00000068383.17	1	UCEC
10	ENSG00000123607.13.vs.ENSG00000244676.4	1	HNSC
10	ENSG00000106803.8.vs.ENSG00000174010.9	2	LIHC,LUAD
10	ENSG00000243433.1.vs.ENSG00000185122.9	1	LUSC
10	ENSG00000143190.20.vs.ENSG00000268403.2	1	BLCA
10	ENSG00000182199.9.vs.ENSG00000134970.13	1	HNSC
10	ENSG00000270792.4.vs.ENSG00000178445.8	1	KIRC
10	ENSG00000174697.4.vs.ENSG00000170819.4	1	KIRC
10	ENSG00000235989.3.vs.ENSG00000167645.15	1	LIHC
10	ENSG00000270021.1.vs.ENSG00000196363.8	1	HNSC
10	ENSG00000204832.8.vs.ENSG00000225506.2	1	HNSC
10	ENSG00000101040.18.vs.ENSG00000223820.5	1	LUAD
10	ENSG00000171495.15.vs.ENSG00000179455.7	1	STAD
10	ENSG00000117632.19.vs.ENSG00000244040.4	2	PRAD,BRCA
10	ENSG00000164007.9.vs.ENSG00000073111.12	1	KIRC
10	ENSG00000143816.7.vs.ENSG00000129596.4	1	BRCA
10	ENSG00000187242.4.vs.ENSG00000150907.6	1	KIRC
10	ENSG00000134769.20.vs.ENSG00000164736.5	1	LIHC
10	ENSG00000117528.10.vs.ENSG00000169241.16	2	STAD,LUSC
10	ENSG00000226088.1.vs.ENSG00000136950.12	1	BLCA
10	ENSG00000168394.10.vs.ENSG00000226526.1	1	BRCA
10	ENSG00000244468.1.vs.ENSG00000108883.11	1	PRAD
10	ENSG00000127951.5.vs.ENSG00000106410.13	1	BLCA
10	ENSG00000168158.3.vs.ENSG00000074219.12	1	KIRP
10	ENSG00000080200.8.vs.ENSG00000111254.6	1	HNSC
10	ENSG00000259687.1.vs.ENSG00000187609.14	1	HNSC
10	ENSG00000130147.14.vs.ENSG00000175787.15	2	LIHC,HNSC
10	ENSG00000188846.12.vs.ENSG00000126231.12	1	LUSC
10	ENSG00000198034.9.vs.ENSG00000197093.9	1	COAD
10	ENSG00000136490.7.vs.ENSG00000260644.5	1	STAD
10	ENSG00000116014.8.vs.ENSG00000121578.11	4	LIHC,STAD,HNSC,BRCA
10	ENSG00000124222.20.vs.ENSG00000095261.12	1	LIHC
10	ENSG00000257167.2.vs.ENSG00000131126.17	1	COAD
10	ENSG00000101057.14.vs.ENSG00000167112.9	1	LUSC
10	ENSG00000196247.10.vs.ENSG00000186063.11	1	COAD
10	ENSG00000114541.13.vs.ENSG00000265190.5	1	KIRC
10	ENSG00000164253.11.vs.ENSG00000143622.9	2	LUAD,BRCA
10	ENSG00000124191.16.vs.ENSG00000120051.13	2	PRAD,HNSC
10	ENSG00000167618.8.vs.ENSG00000232973.10	1	BRCA
10	ENSG00000198898.11.vs.ENSG00000196782.11	2	LIHC,PRAD
10	ENSG00000258791.6.vs.ENSG00000082516.8	1	LUAD
10	ENSG00000074071.12.vs.ENSG00000138190.15	2	STAD,UCEC
10	ENSG00000155858.5.vs.ENSG00000130669.16	3	LUAD,HNSC,KIRC
10	ENSG00000259847.1.vs.ENSG00000119912.14	1	STAD
10	ENSG00000156234.7.vs.ENSG00000144406.17	1	KIRC
10	ENSG00000106479.9.vs.ENSG00000160145.14	2	STAD,PRAD
10	ENSG00000213366.11.vs.ENSG00000243716.9	1	LUAD
10	ENSG00000174948.5.vs.ENSG00000157601.12	1	PRAD
10	ENSG00000174576.7.vs.ENSG00000183317.15	1	PRAD
10	ENSG00000112208.11.vs.ENSG00000213065.2	1	PRAD
10	ENSG00000116544.10.vs.ENSG00000235530.5	2	PRAD,COAD
10	ENSG00000130513.6.vs.ENSG00000259332.2	2	LUAD,PRAD
10	ENSG00000267015.1.vs.ENSG00000267246.1	1	LUAD
10	ENSG00000104490.16.vs.ENSG00000102172.14	2	STAD,BRCA
10	ENSG00000276547.1.vs.ENSG00000167969.11	2	LUSC,KIRC
10	ENSG00000230417.9.vs.ENSG00000188315.6	1	BRCA
10	ENSG00000129214.13.vs.ENSG00000225889.6	1	KIRC
10	ENSG00000235091.1.vs.ENSG00000272970.1	1	HNSC
10	ENSG00000143553.9.vs.ENSG00000176155.17	1	KIRC
10	ENSG00000174282.10.vs.ENSG00000171295.11	2	COAD,UCEC
10	ENSG00000101773.15.vs.ENSG00000262966.2	1	UCEC
10	ENSG00000186416.11.vs.ENSG00000133135.12	3	STAD,PRAD,THCA
10	ENSG00000142871.14.vs.ENSG00000106066.12	1	PRAD
10	ENSG00000272918.1.vs.ENSG00000064490.12	1	LUSC
10	ENSG00000086696.9.vs.ENSG00000173221.12	1	BRCA
10	ENSG00000221890.2.vs.ENSG00000171502.13	1	UCEC
10	ENSG00000229891.1.vs.ENSG00000229671.1	1	LIHC
10	ENSG00000122644.11.vs.ENSG00000134917.9	1	KIRP
10	ENSG00000260439.1.vs.ENSG00000101489.17	3	STAD,PRAD,KIRC
10	ENSG00000250803.4.vs.ENSG00000170004.15	2	LUAD,UCEC
10	ENSG00000160255.15.vs.ENSG00000239213.4	1	LIHC
10	ENSG00000057468.6.vs.ENSG00000187867.7	1	THCA
10	ENSG00000133424.19.vs.ENSG00000109079.8	1	KIRC
10	ENSG00000266921.1.vs.ENSG00000114850.5	1	THCA
10	ENSG00000145850.7.vs.ENSG00000073861.2	2	LUSC,BLCA
10	ENSG00000251491.2.vs.ENSG00000214050.6	1	UCEC
10	ENSG00000272368.2.vs.ENSG00000164741.13	1	LIHC
10	ENSG00000280194.1.vs.ENSG00000144647.5	2	BLCA,COAD
10	ENSG00000253476.1.vs.ENSG00000144029.10	1	BRCA
10	ENSG00000164889.11.vs.ENSG00000248243.1	1	BRCA
10	ENSG00000162746.13.vs.ENSG00000183145.7	3	KIRC,KIRP,THCA
10	ENSG00000170906.14.vs.ENSG00000153132.11	2	LIHC,THCA
10	ENSG00000161544.8.vs.ENSG00000146112.10	1	STAD
10	ENSG00000050555.16.vs.ENSG00000214866.6	1	PRAD
10	ENSG00000140743.6.vs.ENSG00000263956.4	1	LUSC
10	ENSG00000165655.15.vs.ENSG00000251141.4	2	BLCA,THCA
10	ENSG00000228157.4.vs.ENSG00000281103.1	1	LIHC
10	ENSG00000099622.12.vs.ENSG00000105290.10	5	STAD,PRAD,HNSC,KIRC,THCA
10	ENSG00000070476.13.vs.ENSG00000204256.11	1	STAD
10	ENSG00000100567.11.vs.ENSG00000103035.9	1	LUSC
10	ENSG00000148604.12.vs.ENSG00000171530.12	1	BRCA
10	ENSG00000196236.11.vs.ENSG00000275179.1	1	LUSC
10	ENSG00000157353.15.vs.ENSG00000177191.2	3	STAD,PRAD,UCEC
10	ENSG00000132906.16.vs.ENSG00000167232.12	1	LIHC
10	ENSG00000273454.1.vs.ENSG00000267166.4	2	STAD,KIRC
10	ENSG00000196700.6.vs.ENSG00000084234.15	2	COAD,THCA
10	ENSG00000276234.3.vs.ENSG00000242419.4	1	BLCA
10	ENSG00000099866.13.vs.ENSG00000260209.1	1	STAD
10	ENSG00000132825.6.vs.ENSG00000067992.11	2	STAD,PRAD
10	ENSG00000173376.12.vs.ENSG00000145555.13	1	BRCA
10	ENSG00000133812.13.vs.ENSG00000196150.12	2	STAD,BLCA
10	ENSG00000275649.1.vs.ENSG00000124215.15	1	STAD
10	ENSG00000151611.12.vs.ENSG00000074964.15	2	LIHC,STAD
10	ENSG00000260841.1.vs.ENSG00000259124.1	1	PRAD
10	ENSG00000138653.8.vs.ENSG00000198538.9	2	STAD,BRCA
10	ENSG00000177666.14.vs.ENSG00000205659.9	1	COAD
10	ENSG00000186432.7.vs.ENSG00000027697.11	1	UCEC
10	ENSG00000165244.6.vs.ENSG00000167186.9	2	LUSC,COAD
10	ENSG00000186998.14.vs.ENSG00000228794.7	2	STAD,BRCA
10	ENSG00000011105.10.vs.ENSG00000276115.1	2	STAD,COAD
10	ENSG00000227676.3.vs.ENSG00000253554.4	1	STAD
10	ENSG00000256995.5.vs.ENSG00000167751.11	1	LUAD
10	ENSG00000253704.1.vs.ENSG00000112852.6	1	BLCA
10	ENSG00000198440.8.vs.ENSG00000259877.2	1	HNSC
10	ENSG00000141096.4.vs.ENSG00000143368.9	1	STAD
10	ENSG00000214725.6.vs.ENSG00000170484.8	1	BLCA
10	ENSG00000143178.11.vs.ENSG00000203724.9	1	BRCA
10	ENSG00000224078.11.vs.ENSG00000250893.1	1	STAD
10	ENSG00000197536.9.vs.ENSG00000253824.1	2	STAD,HNSC
10	ENSG00000262585.1.vs.ENSG00000109046.13	1	LUSC
10	ENSG00000116785.12.vs.ENSG00000141030.11	1	STAD
10	ENSG00000163743.12.vs.ENSG00000036530.7	1	STAD
10	ENSG00000147234.9.vs.ENSG00000243335.7	1	STAD
10	ENSG00000241852.8.vs.ENSG00000119121.20	1	HNSC
10	ENSG00000197766.6.vs.ENSG00000242550.4	1	BRCA
10	ENSG00000268403.2.vs.ENSG00000067836.11	4	LUSC,BLCA,BRCA,UCEC
10	ENSG00000242861.1.vs.ENSG00000139921.11	1	BRCA
10	ENSG00000185475.7.vs.ENSG00000005189.18	3	LUAD,BRCA,THCA
10	ENSG00000103489.10.vs.ENSG00000233822.4	1	BRCA
10	ENSG00000117020.15.vs.ENSG00000272146.4	1	HNSC
10	ENSG00000173253.13.vs.ENSG00000179476.6	1	BRCA
10	ENSG00000188368.8.vs.ENSG00000264067.1	1	COAD
10	ENSG00000132000.10.vs.ENSG00000086159.11	1	HNSC
10	ENSG00000172508.9.vs.ENSG00000280198.1	3	STAD,BLCA,THCA
10	ENSG00000250240.4.vs.ENSG00000255529.6	1	STAD
10	ENSG00000140718.17.vs.ENSG00000260676.4	1	UCEC
10	ENSG00000198816.5.vs.ENSG00000165006.12	1	LUSC
10	ENSG00000213445.7.vs.ENSG00000119801.11	1	BRCA
10	ENSG00000266904.4.vs.ENSG00000267666.1	2	LUSC,COAD
10	ENSG00000099365.8.vs.ENSG00000234509.1	1	COAD
10	ENSG00000253187.2.vs.ENSG00000204257.13	1	LUSC
10	ENSG00000230267.6.vs.ENSG00000075043.16	1	HNSC
10	ENSG00000167081.15.vs.ENSG00000197816.12	1	LUAD
10	ENSG00000083812.10.vs.ENSG00000136848.15	1	BRCA
10	ENSG00000164684.12.vs.ENSG00000265458.1	1	LUAD
10	ENSG00000196961.11.vs.ENSG00000088256.7	1	LIHC
10	ENSG00000143333.6.vs.ENSG00000177628.14	2	LUAD,LUSC
10	ENSG00000221946.6.vs.ENSG00000184905.7	1	LUAD
10	ENSG00000224958.4.vs.ENSG00000239789.4	1	STAD
10	ENSG00000197084.5.vs.ENSG00000206503.10	1	LUSC
10	ENSG00000244050.2.vs.ENSG00000105404.9	1	PRAD
10	ENSG00000096872.14.vs.ENSG00000198924.6	2	HNSC,BRCA
10	ENSG00000167034.9.vs.ENSG00000163961.4	2	STAD,PRAD
10	ENSG00000010282.13.vs.ENSG00000166136.14	1	KIRC
10	ENSG00000233183.2.vs.ENSG00000166342.17	1	BRCA
10	ENSG00000267041.4.vs.ENSG00000225518.2	1	PRAD
10	ENSG00000162745.9.vs.ENSG00000197594.10	1	PRAD
10	ENSG00000051596.8.vs.ENSG00000083642.17	1	COAD
10	ENSG00000171793.12.vs.ENSG00000227589.1	1	LIHC
10	ENSG00000258083.1.vs.ENSG00000198088.9	1	UCEC
10	ENSG00000179833.4.vs.ENSG00000268307.1	1	PRAD
10	ENSG00000234693.1.vs.ENSG00000198894.6	1	BRCA
10	ENSG00000271390.1.vs.ENSG00000249267.5	1	LUSC
10	ENSG00000273137.1.vs.ENSG00000005175.8	3	LIHC,LUAD,BLCA
10	ENSG00000253953.2.vs.ENSG00000186660.14	1	COAD
10	ENSG00000261334.1.vs.ENSG00000148498.14	1	STAD
10	ENSG00000186451.1.vs.ENSG00000173208.3	1	LIHC
10	ENSG00000254685.5.vs.ENSG00000138279.14	1	BRCA
10	ENSG00000215912.10.vs.ENSG00000188693.7	1	KIRP
10	ENSG00000223609.6.vs.ENSG00000051523.9	1	BRCA
10	ENSG00000133138.18.vs.ENSG00000143258.14	3	LIHC,LUSC,COAD
10	ENSG00000225279.1.vs.ENSG00000113282.12	1	STAD
10	ENSG00000204305.12.vs.ENSG00000178695.5	1	BRCA
10	ENSG00000151366.11.vs.ENSG00000010438.15	1	LUAD
10	ENSG00000139572.3.vs.ENSG00000269313.4	2	BLCA,THCA
10	ENSG00000158113.11.vs.ENSG00000106003.11	2	HNSC,KIRP
10	ENSG00000268516.2.vs.ENSG00000161914.8	1	LUAD
10	ENSG00000165516.9.vs.ENSG00000170043.10	2	STAD,COAD
10	ENSG00000182533.6.vs.ENSG00000168061.12	1	HNSC
10	ENSG00000213062.4.vs.ENSG00000197498.11	1	KIRC
10	ENSG00000197620.9.vs.ENSG00000160145.14	1	STAD
10	ENSG00000123352.16.vs.ENSG00000181026.14	1	PRAD
10	ENSG00000037280.14.vs.ENSG00000165238.15	2	PRAD,BRCA
10	ENSG00000260115.1.vs.ENSG00000135486.16	1	LUAD
10	ENSG00000230587.1.vs.ENSG00000178623.10	1	STAD
10	ENSG00000173226.15.vs.ENSG00000245281.5	1	LUSC
10	ENSG00000259891.1.vs.ENSG00000121335.11	1	HNSC
10	ENSG00000124159.14.vs.ENSG00000213401.7	1	STAD
10	ENSG00000125319.13.vs.ENSG00000196911.8	1	STAD
10	ENSG00000135525.17.vs.ENSG00000273394.1	2	COAD,KIRP
10	ENSG00000186792.14.vs.ENSG00000274560.1	1	BRCA
10	ENSG00000109265.11.vs.ENSG00000139597.15	1	STAD
10	ENSG00000178567.7.vs.ENSG00000259158.2	3	LIHC,COAD,HNSC
10	ENSG00000083544.12.vs.ENSG00000137210.12	1	HNSC
10	ENSG00000103502.12.vs.ENSG00000137251.14	1	STAD
10	ENSG00000145725.18.vs.ENSG00000105290.10	2	STAD,LUAD
10	ENSG00000197157.9.vs.ENSG00000273391.1	1	LUAD
10	ENSG00000120662.14.vs.ENSG00000264548.1	1	BRCA
10	ENSG00000065054.12.vs.ENSG00000224805.2	3	LUAD,BLCA,THCA
10	ENSG00000139351.13.vs.ENSG00000127191.16	1	HNSC
10	ENSG00000228084.1.vs.ENSG00000060971.16	1	LUAD
10	ENSG00000260929.1.vs.ENSG00000125814.16	1	COAD
10	ENSG00000131408.12.vs.ENSG00000116147.15	2	LIHC,BRCA
10	ENSG00000213492.2.vs.ENSG00000168530.14	1	HNSC
10	ENSG00000238099.2.vs.ENSG00000198331.9	1	KIRC
10	ENSG00000256164.1.vs.ENSG00000088451.9	1	BRCA
10	ENSG00000226067.5.vs.ENSG00000138792.8	1	STAD
10	ENSG00000196735.10.vs.ENSG00000128011.4	1	BRCA
10	ENSG00000269226.6.vs.ENSG00000136634.5	1	BRCA
10	ENSG00000123836.13.vs.ENSG00000102125.14	1	LIHC
10	ENSG00000162923.13.vs.ENSG00000179632.8	2	LUSC,COAD
10	ENSG00000102362.14.vs.ENSG00000172543.6	6	LIHC,LUAD,BLCA,COAD,KIRC,THCA
10	ENSG00000198759.10.vs.ENSG00000108298.8	1	BRCA
10	ENSG00000198765.10.vs.ENSG00000214517.7	1	UCEC
10	ENSG00000236307.2.vs.ENSG00000219951.4	1	LIHC
10	ENSG00000139372.13.vs.ENSG00000266473.1	1	STAD
10	ENSG00000269191.1.vs.ENSG00000095203.13	1	LIHC
10	ENSG00000186074.17.vs.ENSG00000186446.10	1	LIHC
10	ENSG00000250696.4.vs.ENSG00000081026.17	2	KIRC,BRCA
10	ENSG00000135392.14.vs.ENSG00000205643.9	1	UCEC
10	ENSG00000159200.16.vs.ENSG00000158553.4	1	LUSC
10	ENSG00000163162.7.vs.ENSG00000205403.11	1	COAD
10	ENSG00000232821.1.vs.ENSG00000156140.7	1	LUAD
10	ENSG00000164434.10.vs.ENSG00000179038.8	1	STAD
10	ENSG00000132329.9.vs.ENSG00000228016.1	1	BRCA
10	ENSG00000198242.12.vs.ENSG00000118242.14	1	UCEC
10	ENSG00000155957.15.vs.ENSG00000075643.5	1	STAD
10	ENSG00000184792.14.vs.ENSG00000198890.7	1	KIRP
10	ENSG00000096433.9.vs.ENSG00000224066.1	1	KIRP
10	ENSG00000162706.11.vs.ENSG00000141738.12	1	LIHC
10	ENSG00000267254.4.vs.ENSG00000269834.4	1	STAD
10	ENSG00000135821.15.vs.ENSG00000246214.1	3	STAD,KIRC,BRCA
10	ENSG00000260209.1.vs.ENSG00000136827.11	1	LUSC
10	ENSG00000140368.11.vs.ENSG00000257636.5	1	LUSC
10	ENSG00000153208.15.vs.ENSG00000260633.1	1	PRAD
10	ENSG00000100154.13.vs.ENSG00000160193.10	1	BLCA
10	ENSG00000161647.17.vs.ENSG00000074356.15	2	STAD,LUSC
10	ENSG00000130052.12.vs.ENSG00000100116.15	1	BRCA
10	ENSG00000161243.7.vs.ENSG00000273056.1	2	STAD,BLCA
10	ENSG00000136535.13.vs.ENSG00000259803.5	2	STAD,BRCA
10	ENSG00000259583.2.vs.ENSG00000178802.16	1	LIHC
10	ENSG00000164010.12.vs.ENSG00000012223.11	2	BLCA,KIRP
10	ENSG00000214654.6.vs.ENSG00000262576.2	2	STAD,HNSC
10	ENSG00000108309.11.vs.ENSG00000139168.6	2	STAD,THCA
10	ENSG00000099814.14.vs.ENSG00000205221.11	1	KIRC
10	ENSG00000164220.6.vs.ENSG00000253729.6	1	HNSC
10	ENSG00000129187.13.vs.ENSG00000258920.1	1	LUSC
10	ENSG00000205861.10.vs.ENSG00000159200.16	1	LUSC
10	ENSG00000136944.16.vs.ENSG00000160959.6	1	COAD
10	ENSG00000266088.4.vs.ENSG00000116957.11	1	LUAD
10	ENSG00000082068.7.vs.ENSG00000076864.18	2	LUSC,BRCA
10	ENSG00000164053.16.vs.ENSG00000268001.1	1	BLCA
10	ENSG00000112699.9.vs.ENSG00000198513.10	1	PRAD
10	ENSG00000177406.4.vs.ENSG00000142279.11	1	LIHC
10	ENSG00000174749.5.vs.ENSG00000272758.4	1	HNSC
10	ENSG00000188848.14.vs.ENSG00000113163.14	1	LIHC
10	ENSG00000132535.17.vs.ENSG00000275532.1	2	PRAD,KIRC
10	ENSG00000070423.16.vs.ENSG00000280200.1	1	LUSC
10	ENSG00000184719.10.vs.ENSG00000084623.10	1	BRCA
10	ENSG00000144524.16.vs.ENSG00000175065.10	1	BLCA
10	ENSG00000101421.3.vs.ENSG00000213619.8	1	HNSC
10	ENSG00000118137.8.vs.ENSG00000224699.7	1	STAD
10	ENSG00000078295.14.vs.ENSG00000176809.9	1	PRAD
10	ENSG00000140798.14.vs.ENSG00000253196.1	1	STAD
10	ENSG00000262814.5.vs.ENSG00000116690.10	1	LUAD
10	ENSG00000183111.10.vs.ENSG00000116985.9	2	HNSC,KIRC
10	ENSG00000224957.4.vs.ENSG00000113048.15	3	LUAD,HNSC,BRCA
10	ENSG00000183943.5.vs.ENSG00000122729.17	2	COAD,BRCA
10	ENSG00000105193.7.vs.ENSG00000235423.7	1	UCEC
10	ENSG00000100129.16.vs.ENSG00000233695.2	2	HNSC,BRCA
10	ENSG00000144959.8.vs.ENSG00000258457.4	1	LIHC
10	ENSG00000255772.4.vs.ENSG00000187581.2	1	BLCA
10	ENSG00000150593.14.vs.ENSG00000125870.9	1	KIRP
10	ENSG00000139737.20.vs.ENSG00000165025.13	1	KIRP
10	ENSG00000130985.15.vs.ENSG00000108262.14	1	BRCA
10	ENSG00000246214.1.vs.ENSG00000059145.17	2	COAD,BRCA
10	ENSG00000186532.10.vs.ENSG00000268756.1	1	KIRC
10	ENSG00000137872.14.vs.ENSG00000235903.6	1	LUAD
10	ENSG00000148943.10.vs.ENSG00000108312.13	1	LUSC
10	ENSG00000234210.1.vs.ENSG00000140386.11	1	BRCA
10	ENSG00000184009.8.vs.ENSG00000258944.1	1	STAD
10	ENSG00000196860.6.vs.ENSG00000226711.5	2	LIHC,PRAD
10	ENSG00000184954.4.vs.ENSG00000244468.1	1	HNSC
10	ENSG00000254154.7.vs.ENSG00000203876.8	1	STAD
10	ENSG00000166188.2.vs.ENSG00000198198.12	1	BRCA
10	ENSG00000232485.2.vs.ENSG00000154127.8	1	LIHC
10	ENSG00000114784.3.vs.ENSG00000169991.9	1	BLCA
10	ENSG00000122584.11.vs.ENSG00000127863.14	2	BLCA,UCEC
10	ENSG00000279229.1.vs.ENSG00000147256.9	1	STAD
10	ENSG00000197912.12.vs.ENSG00000142657.19	2	LIHC,PRAD
10	ENSG00000189046.9.vs.ENSG00000162385.9	1	LIHC
10	ENSG00000123610.4.vs.ENSG00000143889.14	1	LIHC
10	ENSG00000235531.8.vs.ENSG00000196562.13	3	LIHC,STAD,BRCA
10	ENSG00000076382.15.vs.ENSG00000154721.13	1	THCA
10	ENSG00000162636.14.vs.ENSG00000135778.10	2	BRCA,THCA
10	ENSG00000137764.18.vs.ENSG00000186439.11	2	PRAD,KIRC
10	ENSG00000008226.18.vs.ENSG00000239857.5	2	LUSC,THCA
10	ENSG00000137731.12.vs.ENSG00000251186.1	1	STAD
10	ENSG00000078699.20.vs.ENSG00000019505.6	1	KIRC
10	ENSG00000076662.8.vs.ENSG00000271133.4	1	COAD
10	ENSG00000228427.1.vs.ENSG00000084636.16	1	LIHC
10	ENSG00000213140.3.vs.ENSG00000238005.2	1	BRCA
10	ENSG00000212978.6.vs.ENSG00000265943.1	1	LIHC
10	ENSG00000106688.10.vs.ENSG00000101811.12	2	STAD,COAD
10	ENSG00000120334.14.vs.ENSG00000111371.14	1	PRAD
10	ENSG00000135363.10.vs.ENSG00000177239.13	1	LUSC
10	ENSG00000213614.8.vs.ENSG00000054967.11	1	KIRC
10	ENSG00000255843.1.vs.ENSG00000081087.13	1	LIHC
10	ENSG00000232600.3.vs.ENSG00000267281.2	2	LIHC,COAD
10	ENSG00000229728.1.vs.ENSG00000166153.15	1	KIRC
10	ENSG00000105341.17.vs.ENSG00000255345.1	1	LUSC
10	ENSG00000171163.14.vs.ENSG00000171067.9	2	LIHC,KIRC
10	ENSG00000235343.1.vs.ENSG00000113209.8	1	STAD
10	ENSG00000224468.3.vs.ENSG00000166681.12	2	LUAD,BLCA
10	ENSG00000197724.9.vs.ENSG00000253167.1	1	LIHC
10	ENSG00000259091.1.vs.ENSG00000164197.10	1	THCA
10	ENSG00000169246.15.vs.ENSG00000106004.4	2	LIHC,BRCA
10	ENSG00000272812.1.vs.ENSG00000159873.8	1	COAD
10	ENSG00000263105.1.vs.ENSG00000185198.10	1	UCEC
10	ENSG00000232611.1.vs.ENSG00000158050.4	1	LUAD
10	ENSG00000100347.13.vs.ENSG00000158286.11	2	COAD,BRCA
10	ENSG00000274267.1.vs.ENSG00000241280.1	2	HNSC,BRCA
10	ENSG00000165495.14.vs.ENSG00000123575.8	3	LIHC,HNSC,BRCA
10	ENSG00000128683.12.vs.ENSG00000186810.7	1	STAD
10	ENSG00000267607.1.vs.ENSG00000137054.14	2	LUSC,UCEC
10	ENSG00000155754.13.vs.ENSG00000161526.13	1	STAD
10	ENSG00000205220.10.vs.ENSG00000129226.12	2	STAD,COAD
10	ENSG00000182393.2.vs.ENSG00000125089.15	1	LUAD
10	ENSG00000228474.4.vs.ENSG00000166670.8	1	HNSC
10	ENSG00000182220.12.vs.ENSG00000126583.9	2	LUAD,KIRP
10	ENSG00000121270.14.vs.ENSG00000111676.13	1	LIHC
10	ENSG00000159450.11.vs.ENSG00000103489.10	2	LIHC,KIRP
10	ENSG00000157992.11.vs.ENSG00000196150.12	2	LIHC,LUAD
10	ENSG00000226155.1.vs.ENSG00000062582.12	1	PRAD
10	ENSG00000106772.16.vs.ENSG00000230432.1	1	KIRC
10	ENSG00000266964.4.vs.ENSG00000006747.13	2	STAD,KIRP
10	ENSG00000130270.15.vs.ENSG00000130733.9	2	LUSC,HNSC
10	ENSG00000143633.11.vs.ENSG00000166589.11	1	KIRP
10	ENSG00000279130.1.vs.ENSG00000125449.5	1	STAD
10	ENSG00000229414.2.vs.ENSG00000163170.10	1	UCEC
10	ENSG00000125484.10.vs.ENSG00000167037.17	1	HNSC
10	ENSG00000071246.9.vs.ENSG00000102290.20	1	THCA
10	ENSG00000134545.12.vs.ENSG00000070718.10	1	BRCA
10	ENSG00000104529.16.vs.ENSG00000105327.14	1	STAD
10	ENSG00000185792.8.vs.ENSG00000091490.9	2	LUSC,PRAD
10	ENSG00000258738.1.vs.ENSG00000159459.10	1	LIHC
10	ENSG00000078967.11.vs.ENSG00000140682.17	1	STAD
10	ENSG00000130528.10.vs.ENSG00000178605.11	2	PRAD,HNSC
10	ENSG00000101558.12.vs.ENSG00000261295.1	1	LUSC
10	ENSG00000271871.1.vs.ENSG00000103241.6	1	PRAD
10	ENSG00000185527.10.vs.ENSG00000272916.4	1	BLCA
10	ENSG00000125447.15.vs.ENSG00000158321.14	1	PRAD
10	ENSG00000119408.15.vs.ENSG00000204118.1	1	HNSC
10	ENSG00000139899.9.vs.ENSG00000134779.13	1	KIRP
10	ENSG00000279372.1.vs.ENSG00000198743.5	1	LIHC
10	ENSG00000100478.13.vs.ENSG00000167674.13	1	KIRC
10	ENSG00000198435.3.vs.ENSG00000163827.11	1	PRAD
10	ENSG00000261105.4.vs.ENSG00000179772.7	2	STAD,PRAD
10	ENSG00000105707.12.vs.ENSG00000165591.6	2	LUAD,BRCA
10	ENSG00000280649.1.vs.ENSG00000150275.16	1	KIRC
10	ENSG00000224616.1.vs.ENSG00000267680.4	1	BRCA
10	ENSG00000129103.16.vs.ENSG00000257184.3	1	STAD
10	ENSG00000184227.6.vs.ENSG00000100122.5	1	UCEC
10	ENSG00000102904.13.vs.ENSG00000205084.9	3	LUAD,KIRP,THCA
10	ENSG00000157224.14.vs.ENSG00000077044.8	1	PRAD
10	ENSG00000254973.1.vs.ENSG00000151276.22	4	LIHC,LUAD,BLCA,HNSC
10	ENSG00000150051.12.vs.ENSG00000159140.16	1	LUSC
10	ENSG00000260439.1.vs.ENSG00000182512.4	1	STAD
10	ENSG00000131398.12.vs.ENSG00000169860.6	1	STAD
10	ENSG00000143365.15.vs.ENSG00000280927.1	3	LIHC,STAD,LUAD
10	ENSG00000279501.1.vs.ENSG00000249463.1	2	STAD,LUSC
10	ENSG00000070269.12.vs.ENSG00000269640.4	1	PRAD
10	ENSG00000204084.11.vs.ENSG00000166900.13	2	KIRC,BRCA
10	ENSG00000262222.1.vs.ENSG00000197808.10	1	LUAD
10	ENSG00000238280.1.vs.ENSG00000107829.12	1	UCEC
10	ENSG00000237353.5.vs.ENSG00000278200.1	1	UCEC
10	ENSG00000153551.12.vs.ENSG00000063015.18	1	LUAD
10	ENSG00000145332.12.vs.ENSG00000172640.3	1	BRCA
10	ENSG00000163285.7.vs.ENSG00000138674.15	1	STAD
10	ENSG00000269392.1.vs.ENSG00000169299.12	1	KIRC
10	ENSG00000103544.13.vs.ENSG00000105136.18	1	STAD
10	ENSG00000145365.10.vs.ENSG00000244203.2	1	STAD
10	ENSG00000110917.6.vs.ENSG00000256084.1	1	STAD
10	ENSG00000070190.11.vs.ENSG00000204131.7	2	LIHC,LUSC
10	ENSG00000099385.10.vs.ENSG00000122958.13	1	STAD
10	ENSG00000177595.16.vs.ENSG00000173276.12	3	LIHC,LUAD,THCA
10	ENSG00000196110.6.vs.ENSG00000281332.1	2	LUSC,COAD
10	ENSG00000176623.10.vs.ENSG00000088320.3	1	LIHC
10	ENSG00000134115.11.vs.ENSG00000253921.1	2	HNSC,UCEC
10	ENSG00000101224.16.vs.ENSG00000146352.11	1	KIRC
10	ENSG00000132024.16.vs.ENSG00000183439.6	1	LUSC
10	ENSG00000108622.9.vs.ENSG00000187079.13	1	HNSC
10	ENSG00000152127.7.vs.ENSG00000188760.9	1	STAD
10	ENSG00000183397.5.vs.ENSG00000203876.8	2	STAD,THCA
10	ENSG00000134057.13.vs.ENSG00000160199.13	1	LUAD
10	ENSG00000185442.11.vs.ENSG00000170382.10	1	PRAD
10	ENSG00000175197.9.vs.ENSG00000223392.1	2	STAD,COAD
10	ENSG00000272391.4.vs.ENSG00000265749.4	2	LUSC,COAD
10	ENSG00000151090.16.vs.ENSG00000274993.1	1	LIHC
10	ENSG00000250254.1.vs.ENSG00000004961.13	1	BLCA
10	ENSG00000136936.9.vs.ENSG00000267711.1	1	LUSC
10	ENSG00000183401.10.vs.ENSG00000100307.11	2	LUSC,BLCA
10	ENSG00000159403.14.vs.ENSG00000165269.11	2	BLCA,HNSC
10	ENSG00000161010.13.vs.ENSG00000185404.15	1	LUAD
10	ENSG00000100453.11.vs.ENSG00000250050.1	1	LUAD
10	ENSG00000144460.11.vs.ENSG00000100554.10	1	BRCA
10	ENSG00000154710.14.vs.ENSG00000233008.4	1	PRAD
10	ENSG00000136404.14.vs.ENSG00000272211.1	1	PRAD
10	ENSG00000126709.13.vs.ENSG00000071553.15	3	PRAD,HNSC,BRCA
10	ENSG00000250535.1.vs.ENSG00000254681.5	1	LIHC
10	ENSG00000168675.17.vs.ENSG00000162585.15	1	PRAD
10	ENSG00000092871.15.vs.ENSG00000172348.13	4	STAD,PRAD,KIRC,BRCA
10	ENSG00000119715.13.vs.ENSG00000204296.10	2	STAD,LUSC
10	ENSG00000100065.13.vs.ENSG00000228824.5	1	BRCA
10	ENSG00000166033.10.vs.ENSG00000230461.7	1	STAD
10	ENSG00000126391.12.vs.ENSG00000125166.11	2	LUSC,PRAD
10	ENSG00000265975.1.vs.ENSG00000167355.6	2	STAD,LUSC
10	ENSG00000178187.6.vs.ENSG00000235269.1	1	LIHC
10	ENSG00000163605.13.vs.ENSG00000103310.9	1	BRCA
10	ENSG00000196557.9.vs.ENSG00000133055.7	2	LUAD,BRCA
10	ENSG00000235978.5.vs.ENSG00000163075.11	1	PRAD
10	ENSG00000064270.11.vs.ENSG00000101057.14	4	PRAD,COAD,KIRC,UCEC
10	ENSG00000232640.1.vs.ENSG00000176946.10	2	BLCA,KIRC
10	ENSG00000189091.11.vs.ENSG00000277639.1	1	PRAD
10	ENSG00000163702.17.vs.ENSG00000253868.3	1	STAD
10	ENSG00000102539.5.vs.ENSG00000196381.9	2	KIRP,THCA
10	ENSG00000168495.11.vs.ENSG00000037241.6	1	HNSC
10	ENSG00000132603.12.vs.ENSG00000128513.13	1	KIRC
10	ENSG00000187017.13.vs.ENSG00000268324.2	1	LIHC
10	ENSG00000142973.11.vs.ENSG00000225339.3	1	UCEC
10	ENSG00000080947.13.vs.ENSG00000230402.2	1	KIRP
10	ENSG00000135269.16.vs.ENSG00000148730.6	3	STAD,LUAD,THCA
10	ENSG00000140319.9.vs.ENSG00000250208.5	1	COAD
10	ENSG00000164542.11.vs.ENSG00000176927.13	1	BLCA
10	ENSG00000011304.15.vs.ENSG00000176533.11	1	LUAD
10	ENSG00000231424.2.vs.ENSG00000169220.16	1	BRCA
10	ENSG00000214279.11.vs.ENSG00000171487.13	2	STAD,UCEC
10	ENSG00000147408.13.vs.ENSG00000214357.7	1	THCA
10	ENSG00000136942.13.vs.ENSG00000121053.5	1	HNSC
10	ENSG00000158195.9.vs.ENSG00000132872.10	1	PRAD
10	ENSG00000187258.12.vs.ENSG00000271787.1	1	LUAD
10	ENSG00000153485.5.vs.ENSG00000166016.5	1	BRCA
10	ENSG00000115239.20.vs.ENSG00000160654.8	2	PRAD,COAD
10	ENSG00000167157.10.vs.ENSG00000242407.1	1	BLCA
10	ENSG00000169062.13.vs.ENSG00000277959.1	1	KIRC
10	ENSG00000147724.10.vs.ENSG00000150630.3	1	LUAD
10	ENSG00000063245.13.vs.ENSG00000163563.7	1	BRCA
10	ENSG00000163631.15.vs.ENSG00000218823.1	1	STAD
10	ENSG00000258334.1.vs.ENSG00000118939.16	2	KIRP,BRCA
10	ENSG00000123636.16.vs.ENSG00000182983.13	1	COAD
10	ENSG00000140009.17.vs.ENSG00000267470.4	2	STAD,HNSC
10	ENSG00000011258.14.vs.ENSG00000104722.12	1	STAD
10	ENSG00000197168.10.vs.ENSG00000198363.14	3	STAD,LUSC,UCEC
10	ENSG00000142634.11.vs.ENSG00000110218.7	1	KIRP
10	ENSG00000126391.12.vs.ENSG00000164611.11	1	LUSC
10	ENSG00000266924.1.vs.ENSG00000187045.15	1	LUSC
10	ENSG00000227199.1.vs.ENSG00000122121.9	2	HNSC,KIRC
10	ENSG00000170364.11.vs.ENSG00000102218.5	2	BLCA,KIRP
10	ENSG00000106028.9.vs.ENSG00000107949.15	1	LUAD
10	ENSG00000224099.1.vs.ENSG00000154122.11	1	STAD
10	ENSG00000105072.7.vs.ENSG00000196747.4	1	LUAD
10	ENSG00000271943.1.vs.ENSG00000005339.11	1	BRCA
10	ENSG00000270951.1.vs.ENSG00000111981.4	1	STAD
10	ENSG00000154370.12.vs.ENSG00000132004.11	1	LUSC
10	ENSG00000169884.12.vs.ENSG00000108852.13	1	KIRP
10	ENSG00000229424.1.vs.ENSG00000279692.1	1	KIRC
10	ENSG00000117598.10.vs.ENSG00000280213.1	1	BRCA
10	ENSG00000158406.3.vs.ENSG00000142619.4	1	LUSC
10	ENSG00000174429.3.vs.ENSG00000261583.1	1	LUAD
10	ENSG00000169193.10.vs.ENSG00000185825.14	1	STAD
10	ENSG00000272968.4.vs.ENSG00000183019.6	1	LUSC
10	ENSG00000100625.8.vs.ENSG00000186260.15	1	BRCA
10	ENSG00000120280.5.vs.ENSG00000259628.1	1	BRCA
10	ENSG00000227507.2.vs.ENSG00000229999.5	1	STAD
10	ENSG00000163499.10.vs.ENSG00000105642.14	2	STAD,PRAD
10	ENSG00000198133.7.vs.ENSG00000100209.8	1	PRAD
10	ENSG00000244165.1.vs.ENSG00000133246.10	1	BRCA
10	ENSG00000100206.8.vs.ENSG00000215068.6	1	LIHC
10	ENSG00000099901.15.vs.ENSG00000138771.13	1	LUAD
10	ENSG00000074211.12.vs.ENSG00000254231.1	1	COAD
10	ENSG00000173905.7.vs.ENSG00000259146.3	2	HNSC,KIRC
10	ENSG00000069011.14.vs.ENSG00000256566.1	1	THCA
10	ENSG00000124067.15.vs.ENSG00000155846.15	1	BLCA
10	ENSG00000214544.6.vs.ENSG00000278175.2	2	STAD,LUSC
10	ENSG00000240682.8.vs.ENSG00000177058.10	1	LUSC
10	ENSG00000253163.1.vs.ENSG00000204709.4	1	BRCA
10	ENSG00000111801.14.vs.ENSG00000164284.13	1	LIHC
10	ENSG00000124939.5.vs.ENSG00000169136.7	3	LIHC,PRAD,BRCA
10	ENSG00000269476.1.vs.ENSG00000265808.3	1	LIHC
10	ENSG00000205730.6.vs.ENSG00000236256.8	1	STAD
10	ENSG00000148356.12.vs.ENSG00000085719.10	3	LUAD,PRAD,BRCA
10	ENSG00000112078.12.vs.ENSG00000173641.16	2	STAD,LUSC
10	ENSG00000173930.8.vs.ENSG00000134285.9	1	STAD
10	ENSG00000249786.6.vs.ENSG00000171560.13	1	STAD
10	ENSG00000205659.9.vs.ENSG00000108506.10	2	COAD,BRCA
10	ENSG00000117245.11.vs.ENSG00000223374.1	1	HNSC
10	ENSG00000131373.13.vs.ENSG00000224383.6	1	UCEC
10	ENSG00000186007.8.vs.ENSG00000224286.4	1	BRCA
10	ENSG00000107816.16.vs.ENSG00000248866.1	2	PRAD,UCEC
10	ENSG00000281344.1.vs.ENSG00000089693.9	2	LIHC,KIRP
10	ENSG00000278022.1.vs.ENSG00000276718.1	1	BRCA
10	ENSG00000225867.1.vs.ENSG00000183439.6	1	STAD
10	ENSG00000184254.15.vs.ENSG00000156504.15	1	STAD
10	ENSG00000182508.12.vs.ENSG00000178449.7	1	HNSC
10	ENSG00000008277.13.vs.ENSG00000228594.3	1	COAD
10	ENSG00000141458.11.vs.ENSG00000085274.14	1	LUAD
10	ENSG00000177025.3.vs.ENSG00000143748.16	2	LIHC,LUSC
10	ENSG00000255299.4.vs.ENSG00000183715.12	1	STAD
10	ENSG00000163684.10.vs.ENSG00000280213.1	1	BLCA
10	ENSG00000087074.7.vs.ENSG00000183785.13	1	PRAD
10	ENSG00000064651.12.vs.ENSG00000275895.3	1	PRAD
10	ENSG00000267551.3.vs.ENSG00000133104.11	2	LUSC,PRAD
10	ENSG00000263786.1.vs.ENSG00000267248.1	1	LUSC
100	ENSG00000165118.13.vs.ENSG00000267546.2	1	BRCA
100	ENSG00000179954.13.vs.ENSG00000231868.1	1	HNSC
100	ENSG00000229127.1.vs.ENSG00000165704.13	1	BRCA
100	ENSG00000266601.1.vs.ENSG00000213420.6	1	BLCA
100	ENSG00000166579.14.vs.ENSG00000118513.17	2	COAD,UCEC
100	ENSG00000197093.9.vs.ENSG00000172469.13	1	COAD
100	ENSG00000156256.13.vs.ENSG00000142188.15	1	LUSC
100	ENSG00000198934.4.vs.ENSG00000235475.1	1	PRAD
100	ENSG00000247728.2.vs.ENSG00000163633.9	1	BRCA
100	ENSG00000111653.18.vs.ENSG00000254860.4	1	KIRC
100	ENSG00000080986.11.vs.ENSG00000275765.3	1	UCEC
100	ENSG00000177614.8.vs.ENSG00000008300.13	1	LUSC
100	ENSG00000269901.1.vs.ENSG00000138039.13	1	BRCA
100	ENSG00000099814.14.vs.ENSG00000197181.10	1	HNSC
100	ENSG00000234210.1.vs.ENSG00000138109.9	1	STAD
100	ENSG00000261707.1.vs.ENSG00000006530.14	1	LUAD
100	ENSG00000117758.12.vs.ENSG00000272473.1	1	LUSC
100	ENSG00000156395.11.vs.ENSG00000116353.14	2	HNSC,KIRP
100	ENSG00000169836.4.vs.ENSG00000141570.9	1	STAD
100	ENSG00000187553.7.vs.ENSG00000259376.1	1	KIRC
100	ENSG00000116754.12.vs.ENSG00000104897.8	1	LIHC
100	ENSG00000105879.10.vs.ENSG00000105321.11	2	HNSC,UCEC
100	ENSG00000166845.12.vs.ENSG00000279799.1	1	KIRC
100	ENSG00000236266.1.vs.ENSG00000205730.6	1	BRCA
100	ENSG00000102471.12.vs.ENSG00000165669.12	2	STAD,BLCA
100	ENSG00000254000.1.vs.ENSG00000083814.11	1	STAD
100	ENSG00000204580.10.vs.ENSG00000258405.8	1	BRCA
100	ENSG00000149591.15.vs.ENSG00000168961.15	2	LIHC,STAD
100	ENSG00000173320.8.vs.ENSG00000123570.3	1	BRCA
100	ENSG00000226330.1.vs.ENSG00000160226.14	1	LUSC
100	ENSG00000226472.6.vs.ENSG00000163629.11	1	KIRP
100	ENSG00000225062.1.vs.ENSG00000177854.7	1	THCA
100	ENSG00000149948.12.vs.ENSG00000172543.6	2	LUAD,KIRC
100	ENSG00000119689.13.vs.ENSG00000186517.12	1	THCA
100	ENSG00000109819.7.vs.ENSG00000267896.1	1	LIHC
100	ENSG00000164621.5.vs.ENSG00000198331.9	1	LUSC
100	ENSG00000166450.11.vs.ENSG00000272143.1	2	STAD,KIRC
100	ENSG00000107560.9.vs.ENSG00000165066.12	1	PRAD
100	ENSG00000100154.13.vs.ENSG00000189180.14	1	BRCA
100	ENSG00000047578.11.vs.ENSG00000169994.17	2	BLCA,BRCA
100	ENSG00000083642.17.vs.ENSG00000168874.11	1	PRAD
100	ENSG00000163435.14.vs.ENSG00000167695.13	1	UCEC
100	ENSG00000169057.18.vs.ENSG00000110218.7	1	HNSC
100	ENSG00000108064.9.vs.ENSG00000239590.1	1	LUAD
100	ENSG00000120868.12.vs.ENSG00000120798.15	2	LIHC,BRCA
100	ENSG00000232600.3.vs.ENSG00000224051.5	3	LIHC,COAD,BRCA
100	ENSG00000143324.12.vs.ENSG00000196814.13	1	HNSC
100	ENSG00000141873.9.vs.ENSG00000164823.8	1	LUSC
100	ENSG00000263961.5.vs.ENSG00000229931.1	1	PRAD
100	ENSG00000102225.14.vs.ENSG00000204161.12	1	HNSC
100	ENSG00000144741.16.vs.ENSG00000268119.4	1	HNSC
100	ENSG00000110721.10.vs.ENSG00000172382.8	1	KIRP
100	ENSG00000103642.10.vs.ENSG00000139626.14	1	BLCA
100	ENSG00000182700.4.vs.ENSG00000125787.10	1	UCEC
100	ENSG00000254840.1.vs.ENSG00000007314.10	1	STAD
100	ENSG00000182685.6.vs.ENSG00000181035.12	1	LIHC
100	ENSG00000238129.4.vs.ENSG00000158220.12	1	LUAD
100	ENSG00000130340.13.vs.ENSG00000168811.5	1	BRCA
100	ENSG00000170379.18.vs.ENSG00000076513.15	1	PRAD
100	ENSG00000152078.8.vs.ENSG00000280061.1	1	PRAD
100	ENSG00000119950.19.vs.ENSG00000167080.7	1	BRCA
100	ENSG00000278017.1.vs.ENSG00000196767.6	1	KIRP
100	ENSG00000270647.4.vs.ENSG00000263264.1	1	BRCA
100	ENSG00000124535.14.vs.ENSG00000198883.10	1	BRCA
100	ENSG00000257008.5.vs.ENSG00000243147.6	1	PRAD
100	ENSG00000213225.7.vs.ENSG00000057468.6	1	STAD
100	ENSG00000258741.3.vs.ENSG00000260592.1	1	BRCA
100	ENSG00000235448.1.vs.ENSG00000090889.11	2	COAD,BRCA
100	ENSG00000134852.13.vs.ENSG00000161677.10	1	KIRP
100	ENSG00000161681.14.vs.ENSG00000260468.1	1	BRCA
100	ENSG00000173598.12.vs.ENSG00000086967.9	1	LIHC
100	ENSG00000238121.4.vs.ENSG00000079616.11	2	LUSC,COAD
100	ENSG00000101276.13.vs.ENSG00000248498.3	1	BLCA
100	ENSG00000227500.8.vs.ENSG00000255737.2	2	STAD,UCEC
100	ENSG00000073756.10.vs.ENSG00000267421.5	1	LIHC
100	ENSG00000171604.10.vs.ENSG00000236939.2	1	THCA
[truncated: 91,724 more rows]

## Sheet: random-up_vs_down
random_cycle	gene pair	number of TCGA datasets	TCGA datasets
1	ENSG00000105717.12.vs.ENSG00000166750.8	3	LUSC,BLCA,BRCA
1	ENSG00000125246.14.vs.ENSG00000100336.16	1	BRCA
1	ENSG00000205279.7.vs.ENSG00000179546.4	1	LUSC
1	ENSG00000143379.11.vs.ENSG00000150459.11	1	STAD
1	ENSG00000203772.7.vs.ENSG00000091536.15	1	BRCA
1	ENSG00000198759.10.vs.ENSG00000155846.15	1	LUSC
1	ENSG00000168961.15.vs.ENSG00000106336.11	2	HNSC,BRCA
1	ENSG00000267309.1.vs.ENSG00000164128.5	1	COAD
1	ENSG00000159579.12.vs.ENSG00000197150.11	2	PRAD,THCA
1	ENSG00000105723.10.vs.ENSG00000261318.1	1	BRCA
1	ENSG00000133874.1.vs.ENSG00000105771.12	1	PRAD
1	ENSG00000092036.15.vs.ENSG00000122965.9	3	LIHC,COAD,HNSC
1	ENSG00000271858.4.vs.ENSG00000151136.13	1	COAD
1	ENSG00000142082.13.vs.ENSG00000265254.1	1	KIRP
1	ENSG00000152413.13.vs.ENSG00000233110.1	3	LIHC,HNSC,THCA
1	ENSG00000188828.10.vs.ENSG00000182329.9	1	UCEC
1	ENSG00000143119.11.vs.ENSG00000226800.5	1	LIHC
1	ENSG00000174231.15.vs.ENSG00000251655.5	1	HNSC
1	ENSG00000154914.15.vs.ENSG00000077721.14	1	LUAD
1	ENSG00000182544.8.vs.ENSG00000132912.11	1	BRCA
1	ENSG00000105974.10.vs.ENSG00000112531.15	3	LIHC,LUAD,HNSC
1	ENSG00000280387.1.vs.ENSG00000132437.16	2	STAD,PRAD
1	ENSG00000232653.7.vs.ENSG00000078369.16	1	BLCA
1	ENSG00000203740.3.vs.ENSG00000148835.10	2	LUAD,BRCA
1	ENSG00000260996.1.vs.ENSG00000263050.1	1	STAD
1	ENSG00000100852.11.vs.ENSG00000172671.18	1	BRCA
1	ENSG00000248590.2.vs.ENSG00000166682.9	1	BRCA
1	ENSG00000153574.8.vs.ENSG00000270629.4	1	COAD
1	ENSG00000254204.1.vs.ENSG00000240898.1	3	LUSC,PRAD,BRCA
1	ENSG00000143624.12.vs.ENSG00000165633.11	1	STAD
1	ENSG00000141699.9.vs.ENSG00000106263.16	1	BRCA
1	ENSG00000255692.1.vs.ENSG00000140263.12	1	LUAD
1	ENSG00000115523.15.vs.ENSG00000117724.11	1	UCEC
1	ENSG00000181284.2.vs.ENSG00000066557.5	1	LIHC
1	ENSG00000213654.8.vs.ENSG00000090615.11	2	LIHC,COAD
1	ENSG00000235010.1.vs.ENSG00000106013.11	1	BRCA
1	ENSG00000169231.12.vs.ENSG00000204789.4	2	STAD,BRCA
1	ENSG00000255108.1.vs.ENSG00000163202.4	2	STAD,LUSC
1	ENSG00000261713.5.vs.ENSG00000227953.5	1	COAD
1	ENSG00000173812.9.vs.ENSG00000276903.1	1	LIHC
1	ENSG00000124196.5.vs.ENSG00000143387.11	1	HNSC
1	ENSG00000123636.16.vs.ENSG00000121410.10	1	STAD
1	ENSG00000244187.6.vs.ENSG00000274895.1	1	HNSC
1	ENSG00000115091.10.vs.ENSG00000049167.12	2	HNSC,THCA
1	ENSG00000113712.15.vs.ENSG00000131100.11	2	HNSC,KIRC
1	ENSG00000185332.5.vs.ENSG00000139874.5	2	STAD,KIRC
1	ENSG00000096654.14.vs.ENSG00000268104.2	1	LIHC
1	ENSG00000164400.5.vs.ENSG00000266708.1	1	STAD
1	ENSG00000232442.1.vs.ENSG00000155269.10	2	STAD,COAD
1	ENSG00000198959.10.vs.ENSG00000171051.7	2	LIHC,KIRC
1	ENSG00000224138.1.vs.ENSG00000186818.11	3	LIHC,LUAD,LUSC
1	ENSG00000130829.16.vs.ENSG00000010671.14	2	LIHC,BRCA
1	ENSG00000279103.1.vs.ENSG00000239887.4	1	COAD
1	ENSG00000235335.2.vs.ENSG00000101213.6	1	LIHC
1	ENSG00000218510.5.vs.ENSG00000178585.13	1	COAD
1	ENSG00000095539.14.vs.ENSG00000273891.1	1	BLCA
[truncated: 93,099 more rows]
