# Supplementary material for: Characterization of bidirectional gene pairs in The Cancer Genome Atlas (TCGA) dataset
Source: PeerJ. 2019 Jun 17;7:e7107. doi: 10.7717/peerj.7107 (PMC6585903; doi:10.7717/peerj.7107)
Supplement: Supplemental Information 10 [file peerj-07-7107-s010.xlsx]

## Sheet: BLCA
probe	gene	adj.P.Val
cg16489193	VPS52;RPS18	8.01e-90
cg22920873	C7orf55-LUC7L2;LUC7L2	1.99e-80
cg17758721	SNRPB	1.05e-71
cg25015277	LA16c-325D7.2	6.97e-64
cg25743481	KIAA1143;KIF15	3.59e-58
cg13289869	AC009501.4;OTX1	4.4e-55
cg17726575	E2F6	3.29e-54
cg25336332	THRB	3.76e-52
cg11667101	TAF5	1.12e-51
cg14063191	ZDHHC12;RP11-545E17.3	1.2e-51
cg06385324	RPS2;SNORA64;AC005363.9;SNHG9;SNORA78	9.78e-50
cg26993251	MACROD1	1.43e-49
cg08566455	RHOQP3	5.18e-49
cg25564800	KPNA1	9.98e-49
cg10228500	EPHA1	9.48e-48
cg05845376	SLC25A2	9.86e-48
cg15103195	AP1S1	7.9e-47
cg20160885	RNF216P1	1.43e-46
cg07303143	KIAA1143;KIF15	7.86e-46
cg22310062	ESCO1	8.23e-46
cg18867912	WDR88	1.8e-45
cg00702638	KIAA1143;KIF15	2.04e-45
cg10351808	FXYD7	4.55e-45
cg06761530	RP11-936I5.1	8.16e-45
cg24888989	KIAA1143;KIF15	4.16e-44
cg15945235	ANKRD22	4.69e-44
cg11574055	NAP1L4P1	5.44e-44
cg10788210	DIAPH3	7.26e-44
cg12141030	KIAA1143;KIF15	1.18e-43
cg09340639	FCRL1	1.34e-43
cg22720029	PISD	2.71e-43
cg17306740	ZBP1	2.95e-43
cg22786486	MIR3618;MIR1306	6.53e-43
cg04420878	RPS20;SNORD54;CTA-397H3.3	1.84e-42
cg05337753	RP11-936I5.1	2.34e-42
cg25840354	TLR10	2.39e-42
cg25790133	FAM193A	3.61e-42
cg18773937	IL1B	5.36e-42
cg27080119	RP11-679C8.2	1.1e-41
cg00050496	FAM222A-AS1	1.21e-41
cg12401425	EXO1	1.35e-41
cg21052656	AIP	1.35e-41
cg15357075	LINC01059	2.24e-41
cg00460776	RNU4-2;RNU4-1	2.34e-41
cg03309938	SNORD14E;SNORD14D;SNORD14C	3.4e-41
cg14002772	RP11-264I13.2	4.21e-41
cg22954906	METTL21EP	7.41e-41
cg10569694	RNF216P1	1.96e-40
cg04470557	P4HA2	2.43e-40
cg24533720	EIF2AK1	5.86e-40
cg05602648	COG2	8.97e-40
cg25368651	DNHD1	3.16e-39
cg08998953	SLC37A4	7.76e-39
cg24554061	NAA40	9.75e-39
cg08543028	RP11-467L13.4	1.25e-38
cg10703481	DNHD1	2.61e-38
cg02457644	AC002398.11;AC002398.12	3.84e-38
cg13153865	RNU6-925P;OSGIN2	3.84e-38
cg14893576	AC012506.4	5.95e-38
cg11314042	AIG1	6.27e-38
cg19565757	PAIP1	6.61e-38
cg11493223	TMC6	7e-38
cg06567855	ATOH8	9.71e-38
cg14090487	GGA1	1.62e-37
cg21747271	AIP	5.62e-37
cg03592197	PSMD8	7.06e-37
cg02533787	LYPD6B	8.74e-37
cg11256214	FAM222A-AS1	1.06e-36
cg23654174	STIL	1.11e-36
cg17167920	NUP210L	1.29e-36
cg09533178	PPP1R12C	1.58e-36
cg11028923	PAIP1	2.03e-36
cg09338875	ZNF500	2.25e-36
cg26960083	EPHA1	2.92e-36
cg01750611	AC010761.6	4.06e-36
cg16126079	DNHD1	4.47e-36
cg13068653	AP000892.6	4.61e-36
cg05948372	MIB1	5.78e-36
cg01950958	NUDT17	6.24e-36
cg10011232	FKBP8	7.26e-36
cg07195577	NEK8;AC010761.14	8.51e-36
cg20342184	GRHL2	1.05e-35
cg19136632	ARL6IP5	1.41e-35
cg02470871	CD80	1.41e-35
cg16784745	MIR148B	1.55e-35
cg04880751	KMO	1.61e-35
cg13047869	FANCD2OS	1.98e-35
cg22141781	NDUFA12	1.98e-35
cg15124109	MRPL24	2.59e-35
cg22660933	HOXB1	3.11e-35
cg01817009	LCAT	5.1e-35
cg14789818	RNA5SP77	5.72e-35
cg26812411	ARHGAP32	6.02e-35
cg00356723	NAA40	6.81e-35
cg22061523	TK1;AFMID	7.17e-35
cg18901278	TMC6	9.6e-35
cg00146645	AL139288.1;HIST3H2BB	1.45e-34
cg08231577	NAP1L4P1	1.82e-34
cg06339606	ANP32A	1.84e-34
cg17882460	AD000671.6;U2AF1L4;PSENEN;AC002398.9	1.89e-34
cg24185397	RP11-173M1.4	1.95e-34
cg26904260	MIR7154	2.13e-34
cg04681489	LINC01059	2.16e-34
cg00224911	RASSF6	2.68e-34
cg00143527	RP11-775C24.5;MESDC1	3.09e-34
cg04548563	SOCS3;RP11-806H10.4	3.19e-34
cg17053854	RP11-75C10.7	3.48e-34
cg17217654	MIR425;NDUFAF3;MIR191	6.27e-34
cg19897172	C7orf73	7.5e-34
cg08296903	CTD-2135D7.2	8.34e-34
cg02847037	ZDHHC20	1.1e-33
cg18956547	CXCR1	1.37e-33
cg10628699	METTL21EP	1.39e-33
cg07027075	RPL9	1.4e-33
cg07136054	RASSF6	1.95e-33
cg26450106	CST7	1.98e-33
cg17602167	SRSF3	2.64e-33
cg10671066	SLAMF6	2.88e-33
cg15122993	AC005609.18	3.43e-33
cg11609668	AP000892.6	4e-33
cg03287940	THRB	5.32e-33
cg14393609	RP11-479O9.3	5.89e-33
cg10637995	BPIFA4P	5.93e-33
cg08468689	GHDC	1.02e-32
cg03490115	INO80B;INO80B-WBP1	1.04e-32
cg12258785	THRB	1.29e-32
cg14153654	RP5-892F13.2	1.76e-32
cg07961632	SYTL1	2.75e-32
cg17004025	PRTN3	3.2e-32
cg24866792	BPIFA4P	3.63e-32
cg24872425	PRR23A	4.13e-32
cg12840248	HLA-DMB	4.71e-32
cg03719032	HAPLN4	5.55e-32
cg22014972	DNHD1	6.44e-32
cg22074858	GBP3	6.5e-32
cg09305680	UTP23	6.67e-32
cg02196651	LNX1-AS2	7.59e-32
cg23322242	AP000695.6	7.65e-32
cg02578944	NKAPL	9.06e-32
cg27163061	MIR1237	1.01e-31
cg25691553	MIR425;NDUFAF3;MIR191	1.11e-31
cg02189785	CLIC3	1.28e-31
cg27665659	AP1S1	1.28e-31
cg18675097	NKAPL	1.47e-31
cg21830368	RP11-936I5.1	1.48e-31
cg24988684	TMC6	1.56e-31
cg16659284	RP11-276H1.2	1.9e-31
cg12416561	C4orf22	1.93e-31
cg04267184	GNRH2	2.46e-31
cg08988797	KB-1562D12.1	3.48e-31
cg25037384	AC009501.4;OTX1	4.43e-31
cg05299486	ATP6V0A1	4.78e-31
cg26660541	RNF216P1	5.35e-31
cg04212239	IFT80	5.49e-31
cg01834614	ACP6	5.65e-31
cg02299136	GTF2H2C	9.73e-31
cg07641807	MIR17;AL162375.1;MIR19A;MIR20A;MIR19B1;MIR92A1	1.07e-30
cg14549976	RP11-154H12.3	1.07e-30
cg13151135	CEP85	1.24e-30
cg09665336	AC010761.6	1.75e-30
cg15458504	RCAN3	1.9e-30
cg19588399	SYTL1	1.93e-30
cg19093689	RP11-161H23.10	2.13e-30
cg14426510	LUC7L3	2.47e-30
cg02935904	TTC22	2.54e-30
cg05708550	KDM3B	3.81e-30
cg15735240	PPP1R10	3.94e-30
cg20699586	RNA5SP77	5.33e-30
cg04794690	RCC2	5.62e-30
cg09156207	ZSCAN12P1	5.9e-30
cg04947157	TMC6	6.14e-30
cg00185336	ABHD11	7.45e-30
cg16225405	AP003419.11;CLCF1;CTC-1337H24.4	8.88e-30
cg12744634	CEP85	8.91e-30
cg15300436	MYT1L-AS1	8.99e-30
cg18265162	SERTAD4-AS1	9.54e-30
cg23129613	REPIN1;ZNF775	1.06e-29
cg08171483	MIR26A1	1.14e-29
cg02177648	VWA7	1.15e-29
cg19592637	VSX1	1.15e-29
cg02794779	RP11-214F16.8	1.17e-29
cg25161912	RPSAP52	1.17e-29
cg00925722	NRN1L	1.27e-29
cg02772121	TRIM15	1.34e-29
cg06111286	IL12B	1.36e-29
cg24685134	TTC22	1.36e-29
cg26279070	RHOQP3	1.42e-29
cg03218909	HAPLN2	2.23e-29
cg10447615	RP11-475E11.9;CLCC1	2.26e-29
cg17935811	DHRS3	2.73e-29
cg09145391	TMEM102	3.7e-29
cg25095814	CASP8	3.76e-29
cg07865607	GNA15	4.33e-29
cg22184989	RP11-473C18.3	4.6e-29
cg04540406	SHCBP1	4.61e-29
cg10696787	HELZ	5.3e-29
cg21748751	PPARD	5.35e-29
cg14568384	TMEM180	7.09e-29
cg16433357	SH3BGRL2	7.37e-29
cg06884882	RNU5F-1	7.73e-29
cg13566919	GZMA	1e-28
cg18103150	DNHD1	1.13e-28
cg04608356	SYTL1	1.34e-28
cg16823083	TP73	1.41e-28
cg07143815	LINC01299	1.42e-28
cg11742202	SLC17A5	1.68e-28
cg02264079	RP11-196G11.2	1.83e-28
cg06135480	GSE1	1.87e-28
cg19395441	C12orf43	1.96e-28
cg03025825	RP11-667K14.14	2.3e-28
cg11264863	SEMG1	2.34e-28
cg23214755	E2F6	2.63e-28
cg07496545	SLC25A2	2.71e-28
cg26687173	WDR88	2.95e-28
cg03283842	FKBP7;PLEKHA3	3.26e-28
cg05506480	RAB6B	3.55e-28
cg14266527	MAB21L2	3.64e-28
cg09177080	UNC13D	4e-28
cg13202816	EIF3M	4.32e-28
cg13249591	S100A10;AL591893.1	4.91e-28
cg05130485	CASP8	5.14e-28
cg19426522	EOMES	5.64e-28
cg27138018	HAPLN2	5.8e-28
cg22730004	SPTA1	5.95e-28
cg12663811	PLEKHN1	6.03e-28
cg02130107	CTD-2574D22.6	6.51e-28
cg01027937	RASSF6	6.58e-28
cg06148175	ACY3	6.71e-28
cg25876656	SERTAD4-AS1	6.71e-28
cg14739664	SLC25A2	7.04e-28
cg04744713	MROH5	7.19e-28
cg05458052	GRHL2	7.74e-28
cg11760857	FLII;MIEF2	7.88e-28
cg00431602	Y_RNA;SAT1	8.44e-28
cg01488159	FHDC1	9.52e-28
cg06718763	RCAN3	1e-27
cg08614301	PBX4	1.03e-27
cg03023152	KB-1562D12.1	1.04e-27
cg15749858	MACC1;AC005083.1	1.15e-27
cg16669650	C6orf132	1.27e-27
cg20524905	IL12A	1.44e-27
cg22590062	SMURF2;AC132812.1	1.49e-27
cg22288613	AGGF1P1	1.53e-27
cg19421752	SLC6A18	1.54e-27
cg08647446	RASSF6	1.63e-27
cg04604142	LUC7L3	1.72e-27
cg07572770	CHD1L	1.89e-27
cg03393602	ABHD3;MIB1	1.99e-27
cg15320998	ZNF212	1.99e-27
cg04986336	ACY3	2.13e-27
cg03581271	RNU6-853P	2.18e-27
cg16774276	HIST1H2AD	2.19e-27
cg01631684	REEP3	2.42e-27
cg27433088	GALNT7	2.87e-27
cg11066209	FTSJ2;NUDT1	2.9e-27
cg26939375	RP11-460N20.4	2.94e-27
cg05686445	SND1-IT1	3.3e-27
cg05611719	MRPL38	3.47e-27
cg05919685	APCS	3.48e-27
cg19199590	LRRN4CL	3.58e-27
cg12346967	KRTAP8-1	3.97e-27
cg03050183	AP5B1	4.27e-27
cg04218899	LAMC2	4.6e-27
cg07603449	KIAA2013	4.61e-27
cg10539274	RASSF6	4.99e-27
cg17670512	MIR4525	5.35e-27
cg20950167	RP11-445F12.2	5.4e-27
cg00743788	MAPK12	5.81e-27
cg01792666	RP11-146F11.1	6.1e-27
cg08785215	FLNB	6.32e-27
cg17297328	SLC25A24	7.24e-27
cg26985798	MS4A15	7.42e-27
cg23158811	PBX4	7.76e-27
cg14231297	ZSCAN18	8.01e-27
cg11436222	HIST1H3E	8.01e-27
cg19006050	RP11-500G10.5;CTAGE7P	8.02e-27
cg19533294	C4orf36	8.25e-27
cg04878973	MIR425;NDUFAF3;MIR191	8.32e-27
cg14085715	MACC1;AC005083.1	8.5e-27
cg01195861	POP5	8.68e-27
cg20639948	ZFAND1;CHMP4C	9.94e-27
cg01519063	KB-1562D12.1	1.03e-26
cg08293097	SMCR5	1.06e-26
cg07827796	WDR88	1.16e-26
cg03283569	RABEPK	1.27e-26
cg16592658	EBI3	1.32e-26
cg27182476	RP11-384F7.2	1.38e-26
cg09582351	ERGIC2	1.43e-26
cg20502215	TSPAN13	1.67e-26
cg11211563	ARHGEF25	1.68e-26
cg02911077	TMC6	1.69e-26
cg18816826	MT1HL1	2.04e-26
cg00751332	CABLES1	2.1e-26
cg05402891	TCL1B	2.15e-26
cg20092046	OASL	2.35e-26
cg15484375	SAA1;RNA5SP334	2.45e-26
cg05346832	CDKN2D	2.5e-26
cg11009596	AURKB	2.56e-26
cg24027320	TASP1	2.61e-26
cg14770633	CCDC121;GPN1	2.67e-26
cg25562958	AL132709.2;MIR1197;MIR323A;MIR758	2.74e-26
cg14822966	SLBP;RP11-572O17.1	2.8e-26
cg04244970	SLAMF7	3.31e-26
cg24387542	LGALS9B	3.34e-26
cg05949640	FAM193A	3.49e-26
cg13686799	MS4A15	3.68e-26
cg06024289	RP11-153F5.7;KRT18	3.83e-26
cg13485320	SLC22A18	3.98e-26
cg13597417	LGALS9C	4.31e-26
cg05788138	OR5L1;OR5L1	4.35e-26
cg07941983	RP11-431M7.3	4.37e-26
cg22779330	MYEOV	4.66e-26
cg18077304	RP11-607P23.1	4.94e-26
cg01397661	EIF2AK1	4.95e-26
cg14806867	DNAJC3-AS1;DNAJC3	5.19e-26
cg25492645	GALNT3;AC009495.2	5.78e-26
cg19501190	RP11-800A3.7	6.37e-26
cg16438182	CTD-2561B21.4	6.4e-26
cg01963002	LMTK2	6.65e-26
cg01261503	POLG2	6.87e-26
cg19139210	TASP1	7.01e-26
cg06287707	CPXCR1	7.56e-26
cg25626375	OC90	7.83e-26
cg24260359	DNASE1L3	8.9e-26
cg14836636	RP11-768F21.1	9.11e-26
cg12378878	DLEU2	9.19e-26
cg23424043	ZC3HAV1	9.2e-26
cg13628022	TTLL11-IT1	9.99e-26
cg07314298	RN7SL674P	1.06e-25
cg06670785	MIR3618;MIR1306	1.12e-25
cg27320005	SLC25A2	1.2e-25
cg23003085	PRDX5	1.21e-25
cg04275695	ZC3H12D	1.29e-25
cg09481866	RP11-936I5.1	1.41e-25
cg04224064	NKX2-1	1.47e-25
cg25835179	ACY3	1.49e-25
cg08267399	LINC01300	1.64e-25
cg08342886	VPS52;RPS18	1.73e-25
cg16998327	TSEN15	1.73e-25
cg25247520	MIR1204	1.92e-25
cg05617798	AURKB	2.01e-25
cg07314523	TK1;AFMID	2.02e-25
cg05091115	REEP3	2.09e-25
cg03760191	RP11-573G6.8	2.23e-25
cg23704802	CTD-2284J15.1	2.34e-25
cg02148612	TRIM58	2.5e-25
cg23909343	PPP2R5A	2.88e-25
cg20821276	HELZ	2.95e-25
cg16977872	FKBP2	3e-25
cg15218995	SPPL2C	3.03e-25
cg24685006	RP4-728D4.2	3.15e-25
cg14851701	RP13-507P19.2	3.16e-25
cg05149386	RP11-351I24.1;ADM	3.26e-25
cg16785213	GABARAPL2	3.44e-25
cg10918927	HOXC4;RP11-834C11.14	4.08e-25
cg24377694	PDYN	4.21e-25
cg10126372	PXDNL	4.44e-25
cg18351406	SOWAHB	4.61e-25
cg06712013	SPATS2	4.65e-25
cg19789466	OAS1	5.19e-25
cg10933003	HAND2-AS1	5.54e-25
cg00280758	NAA15	5.94e-25
cg06663644	SPTBN4	6.39e-25
cg15745401	P2RY6	6.44e-25
cg11523799	LRRC73	6.89e-25
cg11912215	TPO	7.29e-25
cg25748764	C20orf203	7.29e-25
cg24802813	TRGV5	7.64e-25
cg05343159	NPS	7.84e-25
cg24704593	MACC1;AC005083.1	7.96e-25
cg22199080	AGAP2	8.7e-25
cg20270863	SERTAD4-AS1	8.87e-25
cg22743884	DEFB135	9.47e-25
cg09788352	RP11-315D16.2	9.74e-25
cg07463541	PCDHA3	9.84e-25
cg03661324	CTNNA2	1.03e-24
cg07871456	LUC7L3	1.06e-24
cg01954305	MIR30D	1.06e-24
cg00392914	RP11-483P21.2;HSBP1	1.08e-24
cg14220224	SDR16C6P	1.12e-24
cg15949277	LINC01137;ZC3H12A	1.18e-24
cg20917083	ARHGDIB	1.27e-24
cg20465661	OR2T6	1.38e-24
cg11942059	COL9A1	1.4e-24
cg01981960	MYL10	1.45e-24
cg07647822	THRB	1.52e-24
cg13382100	RP11-417L19.4	1.53e-24
cg09697696	LINC01024	1.58e-24
cg14601357	PTK6	1.68e-24
cg07599144	AC135048.13;ORAI3	1.96e-24
cg11201447	MIR1204	2.09e-24
cg23877608	EMP3	2.11e-24
cg22955387	MIR503HG;MIR503;MIR424	2.22e-24
cg24174145	KRT80	2.27e-24
cg20749059	SPATA12	2.3e-24
cg06269035	IFT140	2.34e-24
cg23820945	GRHL3	2.37e-24
cg04388226	FLJ37505	2.64e-24
cg13356175	S100A7L2	2.6e-24
cg06842800	RP11-338E21.1;RASSF3	2.63e-24
cg08884591	SCGB2A2	2.63e-24
cg04314261	CLEC12B	2.64e-24
cg09601514	MARCO	2.87e-24
cg00576550	HTR3D	2.89e-24
cg19468962	WDR88	3e-24
cg08453688	KLHL18	3.51e-24
cg23187101	ATP8B3	3.71e-24
cg18160135	AC019131.1	3.82e-24
cg06720467	SFN	3.94e-24
cg10530883	IRX1	4.08e-24
cg21500354	DNHD1	4.11e-24
cg18279094	FOXD3-AS1	4.25e-24
cg07723365	MCEMP1;CTD-3214H19.16	4.25e-24
cg06546469	AC018685.2	4.33e-24
cg03770410	ZNF831	4.53e-24
cg21871883	PAXBP1	4.68e-24
cg17570276	EIF2AK1	4.73e-24
cg10659886	ZSCAN18	5.03e-24
cg14066757	KCNN4	5.13e-24
cg00798876	TTYH3	5.36e-24
cg12390011	RAB19	5.6e-24
cg01022345	MIR770	5.82e-24
cg06084952	AC135048.13;ORAI3	5.99e-24
cg05207834	SPAG9	5.99e-24
cg15646382	TMCO6	6.01e-24
cg04069927	TMEM154	6.06e-24
cg18693704	CMTM4	6.11e-24
cg05936895	RP4-811H24.9;TSSK3	6.31e-24
cg27388911	THRB	6.66e-24
cg07048519	CDRT1	6.75e-24
cg23130075	ACY3	6.84e-24
cg17206393	TRPC4AP	7.07e-24
cg00489219	ZNF621	7.2e-24
cg20225745	KRT80	7.46e-24
cg16879247	SRSF3	7.58e-24
cg17815049	CNST	7.81e-24
cg03742808	TMC6	8.48e-24
cg15003208	POC1A	8.48e-24
cg26892635	OR1F1	8.57e-24
cg17060964	OR5AS1	8.71e-24
cg16723982	EIF2AK4	8.76e-24
cg21836358	FOXD3-AS1	8.86e-24
cg03718677	TMOD4	1.05e-23
cg01556457	SNX22	1.06e-23
cg07280593	LILRA1	1.1e-23
cg15202552	FCRL3	1.13e-23
cg27582986	CSNK1G2-AS1	1.18e-23
cg03476007	INPP4B	1.19e-23
cg03190267	TBC1D24	1.22e-23
cg17384457	CEACAM20	1.25e-23
cg04663916	EBPL	1.31e-23
cg17701168	SET	1.35e-23
cg23774016	OR10J3	1.37e-23
cg25028162	SIGLEC5;SIGLEC5;SIGLEC14;RPL7P51	1.39e-23
cg16686174	RP11-936I5.1	1.48e-23
cg25623035	RFWD2;RP11-195C7.1	1.69e-23
cg00455327	CABLES1	1.76e-23
cg14022550	ERMN	1.87e-23
cg05006755	RP11-95P2.3	1.89e-23
cg26180469	AP001453.1	2.01e-23
cg04871778	TTC22	2.1e-23
cg21341586	AC019131.1	2.15e-23
cg21090298	MCF2L-AS1	2.19e-23
cg21333665	UNC13D	2.2e-23
cg06367647	BRINP3;LINC01351	2.24e-23
cg07167423	RP4-728D4.2	2.3e-23
cg16549644	ARL16	2.37e-23
cg11800608	C20orf85	2.41e-23
cg16561172	CASC11;MYC	2.46e-23
cg18131141	RP4-728D4.2	2.69e-23
cg19071002	RP11-184C23.4	2.71e-23
cg02692052	TNFRSF10A	2.94e-23
cg05202804	SWSAP1	2.98e-23
cg23399286	OC90	3.18e-23
cg18853199	RP11-285E9.6	3.22e-23
cg19498319	TSPAN13	3.23e-23
cg09256448	RAB40C	3.32e-23
cg20672708	TM9SF4	3.36e-23
cg09887220	LINC00391	3.36e-23
cg17536595	RSPH9	3.44e-23
cg23919924	OR10G8	3.47e-23
cg07380095	PLEKHG1;RP11-136K14.1	3.55e-23
cg04220482	GGH	3.71e-23
cg15885430	RP11-811I15.1	3.85e-23
cg06051311	TRIM15	3.87e-23
cg20608990	CASP8	3.98e-23
cg21342392	IMMP2L	4.1e-23
cg20314325	CASC5	4.25e-23
cg04715245	IL6R	4.32e-23
cg16372047	NDUFA12	4.37e-23
cg07687610	DNM1L	4.75e-23
cg04334235	IGHEP1	4.99e-23
cg05177629	SEMG1	5.05e-23
cg17707274	MMP7	5.14e-23
cg24214260	ZNF551;AC003006.7	5.28e-23
cg01119512	GRHL3	5.33e-23
cg06588028	LPAR5	5.38e-23
cg07344468	RP11-676M6.1	5.91e-23
cg25432738	MIR4499	5.99e-23
cg06966811	OTX2	6.21e-23
cg07837085	SLAMF7	6.41e-23
cg27315635	KCNJ9	6.52e-23
cg10883352	PBX2P1	6.68e-23
cg12422154	TRIM15	6.74e-23
cg01240599	ACY3	6.85e-23
cg16736018	RP11-66D17.3	7.53e-23
cg20392842	HLA-DMB	7.56e-23
cg17530247	ARIH2	7.57e-23
cg27321750	ARHGAP8	7.63e-23
cg02226239	CYP11B2	7.66e-23
cg01644850	ZNF551;AC003006.7	7.75e-23
cg20810997	DEFB119	8.01e-23
cg19673664	XXbac-BPG308K3.5	8.08e-23
cg14848772	HIST1H2AG	8.42e-23
cg24499627	C10orf54	8.54e-23
cg23095743	PITX3	8.56e-23
cg15164103	MESTIT1_1;MESTIT1_2	8.56e-23
cg14856606	C4BPA	8.96e-23
cg13726843	RP11-670E13.6	8.97e-23
cg25730098	NLRP4	9.05e-23
cg07781399	CCND1	9.75e-23
cg26527913	TRGV7	9.82e-23
cg02638567	AC079398.2	1.02e-22
cg26627956	IMPDH1P10;RNU7-45P	1.02e-22
cg24432768	CD1D	1.07e-22
cg08197797	PERP	1.1e-22
cg04772818	RP11-134G8.7	1.1e-22
cg04243368	CTA-342B11.2	1.16e-22
cg22637867	ZNF709	1.2e-22
cg04268405	CHST3	1.32e-22
cg02181247	RP11-351I24.1;ADM	1.34e-22
cg06239191	SHARPIN	1.35e-22
cg25259754	FCRL3	1.38e-22
cg10925082	ARHGDIB	1.44e-22
cg05133853	HBBP1	1.46e-22
cg07172334	KRTAP24-1	1.46e-22
cg23423766	NOL7	1.51e-22
cg16155382	GRHL3	1.52e-22
cg08452061	DUSP1	1.52e-22
cg11489090	PRSS51	1.53e-22
cg25612480	UBE2V2	1.55e-22
cg02596427	AC073283.7	1.57e-22
cg04472592	KRT80	1.65e-22
cg26099876	ERICD	1.68e-22
cg02134976	C6orf132	1.7e-22
cg06745704	SYTL1	1.82e-22
cg04931539	RP11-358D14.2	1.84e-22
cg27646205	PRKCSH	1.84e-22
cg07381930	GOLGA7B	1.85e-22
cg15015426	OR10J5	1.9e-22
cg24000908	SLC12A7	1.91e-22
cg24997562	OASL	1.94e-22
cg04158612	LA16c-349E11.1	1.96e-22
cg00910715	RHOQP2	1.98e-22
cg11069071	MIR154;MIR496	1.99e-22
cg02956542	PGLYRP4	1.99e-22
cg20786131	CABLES1	2e-22
cg25284213	MIR206	2.04e-22
cg21091985	MSH5;MSH5-SAPCD1	2.14e-22
cg01618245	RP11-261N11.8	2.15e-22
cg03494634	OR7G3	2.23e-22
cg20099806	DDX42	2.24e-22
cg01877606	LNX1-AS2	2.26e-22
cg02839123	FAM83F	2.26e-22
cg07648740	HTR5A-AS1	2.31e-22
cg05380558	AC024592.12;NDUFA11;AC104532.2;VMAC	2.37e-22
cg03019112	AL132709.4;MIR487A	2.37e-22
cg23234674	SNORA74B	2.43e-22
cg17306637	CLDN20	2.48e-22
cg22405653	KRTAP21-1	2.51e-22
cg13767245	SRRM3	2.55e-22
cg19757573	AL132709.7;AL132709.9;MIR654;MIR376B;AL132709.6;MIR300	2.74e-22
cg02707176	PCDHGA11	2.78e-22
cg27005118	COX10	2.85e-22
cg12630277	GJD4	2.88e-22
cg14631276	SHARPIN;KIAA1875	2.88e-22
cg05083414	FAM193A	3.11e-22
cg20025658	CXCR1	3.18e-22
cg09354317	RP5-966M1.6;MUSTN1	3.32e-22
cg25389463	RBM34	3.5e-22
cg13027458	APOOP5	3.56e-22
cg17288102	XPNPEP1	3.58e-22
cg02423618	SPATA8	3.61e-22
cg06456125	RP11-479O9.3	3.61e-22
cg10743062	NCOA6	3.61e-22
cg10714284	HLA-DMB	3.69e-22
cg03013817	RP11-37C7.3	3.81e-22
cg07053841	OR2W1	3.9e-22
cg25696807	MIR891A	4.06e-22
cg08870893	AARD	4.09e-22
cg23024444	SLU7;PTTG1	4.2e-22
cg02459415	OR5L2	4.33e-22
cg26781303	RP11-95P2.3	4.35e-22
cg00396158	LINC01024	4.43e-22
cg17367472	KRTAP11-1	4.83e-22
cg12270485	ADAMTS8	4.86e-22
cg07639783	PSMG3	4.86e-22
cg02739870	SLC12A7	4.96e-22
cg26394308	ZACN	4.98e-22
cg08014964	MYH4	5.02e-22
cg14440205	MIR379;MIR411	5.09e-22
cg21832150	PLEKHN1	5.24e-22
cg24065328	VWA7	5.27e-22
cg12877723	RP11-17A4.2	5.57e-22
cg08550839	LGI4;FXYD7	5.62e-22
cg25763716	VCAM1	5.65e-22
cg08291430	N6AMT1	5.66e-22
cg02764346	GALNT3;AC009495.2	5.84e-22
cg18186672	DYSF	5.93e-22
cg24900666	HOXB1	5.98e-22
cg17941572	LINC00466	6.16e-22
cg24385652	FAM170B-AS1	6.3e-22
cg00366531	RHOQP3	6.3e-22
cg00448814	NKAPL	6.54e-22
cg18064152	TNFRSF10A	6.68e-22
cg20054157	SFTA1P	6.7e-22
cg07798694	ZNF330	6.72e-22
cg13897914	NDUFAF1	6.81e-22
cg10805956	RRNAD1	6.93e-22
cg07780348	FOXR1	7.16e-22
cg00249511	CDHR5;SCT	7.22e-22
cg23325413	CTD-2161F6.3	7.27e-22
cg00870279	MIR6873;PFDN6;MIR6834	7.31e-22
cg18417954	CTD-2587H24.4	7.46e-22
cg00665650	PAIP2	7.57e-22
cg19653594	BLVRB;SPTBN4	7.61e-22
cg05937737	SLC7A14	7.72e-22
cg25631489	PHC3	7.86e-22
cg20170777	COX10	8.19e-22
cg22130834	TTC22	8.19e-22
cg00718513	IGKV7-3	8.24e-22
cg22794244	OR10G9	8.28e-22
cg15692052	HTR2A	8.49e-22
cg01525538	DUSP5P1	8.81e-22
cg00302081	FAM225B;FAM225A	8.99e-22
cg11844087	AC006003.3	9.21e-22
cg24496475	NKX1-1	9.27e-22
cg15359390	REG1P	9.52e-22
cg17463745	ANO7P1	9.81e-22
cg12606911	CD8A	9.87e-22
cg03938558	CACNA1E	9.95e-22
cg02090805	PXDNL	1.01e-21
cg02778609	UBFD1	1.05e-21
cg06927775	ATP6V0A1	1.05e-21
cg00280812	KRT80	1.05e-21
cg08376117	AF001548.5	1.11e-21
cg22500132	MUC1	1.16e-21
cg25390506	C7orf73	1.16e-21
cg05081953	ERMN	1.17e-21
cg02685680	SLC6A19	1.18e-21
cg18970434	AL928742.12	1.21e-21
cg22932220	NME1-NME2	1.22e-21
cg03577250	C20orf203	1.28e-21
cg02297967	LINC00968	1.3e-21
cg14824732	FHDC1	1.3e-21
cg20320656	AC087884.1	1.32e-21
cg03517998	FAM183B	1.35e-21
cg26955996	CABP5	1.36e-21
cg04095776	PSORS1C2;POLR2LP	1.38e-21
cg06719487	APITD1-CORT;APITD1	1.39e-21
cg13739345	HAUS6	1.4e-21
cg01395254	MYT1L	1.41e-21
cg17134153	FCRL3	1.41e-21
cg08284371	RP11-431M7.3	1.49e-21
cg02666638	CNTD2	1.54e-21
cg25545500	OR8K1	1.61e-21
cg07580831	AC011754.1	1.64e-21
cg02930239	PRR23C	1.68e-21
cg10804656	RP11-573G6.8	1.69e-21
cg13678641	AURKB	1.75e-21
cg21529807	CEACAM4	1.76e-21
cg20461998	IER3IP1;IER3IP1	1.77e-21
cg20971488	DUSP5P1;SNORA51	1.78e-21
cg07052041	ADAM8	1.79e-21
cg00620976	RP11-351A20.1	1.8e-21
cg09905605	RP11-196G11.2	1.82e-21
cg07776419	MIR503HG;MIR503;MIR424	1.83e-21
cg23752828	DCTN2	1.83e-21
cg18862481	TRH	1.83e-21
cg04181701	RP11-476I15.6	1.84e-21
cg00160262	OR6P1	1.87e-21
cg22610645	ARHGEF25	1.99e-21
cg26199241	TBX4	1.99e-21
cg06526753	RP11-154J22.1;DUT	1.99e-21
cg18352935	OR51F2	2e-21
cg25483003	ENTPD2	2.02e-21
cg08069370	FAM96A	2.02e-21
cg26288806	ACY3	2.22e-21
cg14865516	PAIP1	2.24e-21
cg07473553	ALG1L	2.25e-21
cg08768395	RNU6-923P	2.3e-21
cg16732787	DUSP5P1	2.32e-21
cg11366178	LNX1-AS2	2.33e-21
cg12798338	TMC6	2.34e-21
cg00123055	SOX17	2.41e-21
cg00876196	KIR2DL4	2.43e-21
cg23882019	TNFRSF10A	2.47e-21
cg12899421	TUFT1;RP11-74C1.4	2.52e-21
cg05865548	MIR543;MIR495	2.54e-21
cg04351905	OLIG1	2.69e-21
cg02974976	NAP1L4P1	2.73e-21
cg05219493	RP11-348J12.2;CYP26C1	2.74e-21
cg24066931	MEX3D	2.79e-21
cg13357249	PIP5K1A	2.84e-21
cg14399884	PPP1CA	2.89e-21
cg07132223	ARHGEF25	2.99e-21
cg26306893	SNHG11;SNORA71E	3.2e-21
cg19154116	C4B-AS1;CYP21A2	3.21e-21
cg23386659	PRTN3	3.23e-21
cg08119452	OLFM4	3.29e-21
cg03352427	NUP210L	3.29e-21
cg19127840	MIR223	3.36e-21
cg11592852	GPR142	3.36e-21
cg07014174	KRTAP11-1	3.5e-21
cg02202169	FOXO1	3.68e-21
cg05445326	TM4SF19-TCTEX1D2;TM4SF19	3.68e-21
cg08776619	HHATL;HHATL-AS1	3.81e-21
cg13148085	HELZ	3.83e-21
cg02484411	AC093326.1	3.88e-21
cg19681842	UBR7	4.07e-21
cg17508591	PCDHA7	4.09e-21
cg17743250	RP11-348J12.2;CYP26C1	4.09e-21
cg16516490	CTSK	4.1e-21
cg00520933	ZEB1	4.12e-21
cg20311002	CYCSP5	4.21e-21
cg00241002	RP13-16H11.7	4.53e-21
cg02861926	NLRP11	4.86e-21
cg14202477	KB-1562D12.1;GRHL2	4.9e-21
cg20958434	IGHA1	4.96e-21
cg27236973	KRT17	5.14e-21
cg20721738	RSPH14;RAB36	5.15e-21
cg25748108	LPIN3	5.31e-21
cg13916459	ALX1	5.36e-21
cg01535630	SMIM1	5.4e-21
cg25153233	RP4-705O1.1	5.71e-21
cg23213278	TRO	5.82e-21
cg14933439	C16orf78	6.09e-21
cg01127423	CTD-2210P24.1	6.17e-21
cg18105139	ZSCAN12P1	6.18e-21
cg13044444	ZNRD1-AS1	6.2e-21
cg08313406	CTD-2575K13.6	6.22e-21
cg24423088	KRTAP8-1	6.37e-21
cg24604013	SOX1	6.47e-21
cg22346461	LAMC2	6.54e-21
cg27426220	EPHA1	6.69e-21
cg07194250	MIR503HG;MIR503;MIR424	6.73e-21
cg15001032	DDC	6.9e-21
cg22984992	CTC-425F1.4;RAD23A	6.96e-21
cg03799530	SH2B3	7.01e-21
cg21751145	C2orf88	7.07e-21
cg03935116	FLJ13224	7.09e-21
cg16697850	MOXD2P	7.11e-21
cg09063683	AC008869.2	7.23e-21
cg01851378	SALL1	7.3e-21
cg21806273	NLRP3	7.3e-21
cg08339192	SIGLEC5;SIGLEC5;SIGLEC14;RPL7P51	7.38e-21
cg21049958	CEACAM4	7.51e-21
cg20944283	ACKR1	7.66e-21
cg01687040	DCD	7.67e-21
cg18197594	IDE	7.88e-21
cg24016624	RELB	7.91e-21
cg12433691	GCC2	8.15e-21
cg12907644	SAA2-SAA4;SAA2;RNA5SP333	8.17e-21
cg08886154	PAX4	8.24e-21
cg00999988	AC009495.2	8.29e-21
cg11725972	RP5-912I13.1	8.56e-21
cg27423177	C3AR1	8.57e-21
cg16688583	PGR	8.64e-21
cg10667970	FBXO6	8.71e-21
cg21877855	EFCAB7	9.16e-21
cg02494781	APOL6	9.16e-21
cg08811509	ZNF484	9.26e-21
cg15697646	MIR425;NDUFAF3;MIR191	9.34e-21
cg03951833	RP11-495P10.3;Y_RNA	9.55e-21
cg11777290	RP11-460N20.4	1e-20
cg26340700	RP11-295G20.2;TSNAX-DISC1;TSNAX	1e-20
cg19670290	HDDC3	1e-20
cg20714551	AC005514.2	1.02e-20
cg08364561	PAUPAR	1.02e-20
cg02759725	OC90	1.04e-20
cg19526685	LINC00861	1.05e-20
cg01515534	CTD-2575K13.6	1.06e-20
cg19476622	CABLES1	1.07e-20
cg25072962	MS4A15	1.1e-20
cg24625388	NEBL	1.11e-20
cg19050940	LMO7DN	1.12e-20
cg10899768	KB-1562D12.1	1.18e-20
cg02386822	MUC1	1.19e-20
cg19005368	PRRG4	1.21e-20
cg05513274	LINC01234	1.24e-20
cg16263367	TPM3P9;ZNF761	1.28e-20
cg13599248	SLC17A5	1.28e-20
cg02131853	TMEM156	1.29e-20
cg05304729	MNDA	1.29e-20
cg21546211	ATF4P4;RP11-667M19.5	1.31e-20
cg10915263	RP11-157G21.2	1.32e-20
cg03188495	GNA15	1.35e-20
cg15211996	ACTRT2	1.39e-20
cg13377102	KCNAB3	1.46e-20
cg15203777	CADM3	1.48e-20
cg13420744	DHRS3;RP11-474O21.5	1.49e-20
cg20772593	ACTBL2;AC025470.1	1.51e-20
cg16986578	RP11-465N4.4;RP11-510N19.5	1.52e-20
cg25641145	ANKRD46	1.56e-20
cg12484738	REEP3	1.57e-20
cg19618897	HELZ	1.61e-20
cg13314965	TM4SF19-TCTEX1D2;TM4SF19	1.63e-20
cg13407335	KCNAB3	1.65e-20
cg03543081	CRP	1.68e-20
cg10177827	MIR381HG;MIR381;MIR487B	1.71e-20
cg12792526	LINC00111	1.71e-20
cg26256192	MIR8085	1.72e-20
cg13804461	CTD-2313J17.1;CTD-2313J17.6	1.77e-20
cg25829945	IL12A	1.79e-20
cg15056751	IL5RA	1.81e-20
cg00241941	RP11-760D2.1	1.84e-20
cg11579116	EMR4P	1.85e-20
cg11495544	GRB2;MIR3678	1.86e-20
cg09858281	SNORD5	1.86e-20
cg24381587	OR6N1	1.87e-20
cg04565008	ACY3	1.88e-20
cg00166722	FANCD2OS	1.9e-20
cg19238840	GP2	1.96e-20
cg17299007	OR2T27	1.96e-20
cg06555227	MIR153-2	1.97e-20
cg10006428	OR2T27	1.99e-20
cg15209808	HORMAD2-AS1;HORMAD2	2.04e-20
cg20131968	DDX42	2.1e-20
cg25922610	OCM	2.1e-20
cg15700197	OR10J1	2.11e-20
cg27333706	MIR205HG	2.11e-20
cg15396204	RP11-233E12.2	2.12e-20
cg15477040	RYKP1	2.13e-20
cg00175487	MIR299;AL132709.2;MIR1197;MIR323A	2.13e-20
cg16365424	RP5-855F14.2	2.17e-20
cg07717903	PCDHGA6	2.31e-20
cg20555674	RP5-906A24.1	2.43e-20
cg00504075	SYT11	2.48e-20
cg09960641	HPN-AS1	2.49e-20
cg21853021	SLC22A18	2.61e-20
cg00666640	OR2T12	2.67e-20
cg03225787	OR6Y1	2.75e-20
cg03239580	C4A-AS1;CYP21A1P	2.8e-20
cg22305258	CXCL16;ZMYND15	2.82e-20
cg04935521	MIR657	2.85e-20
cg18024113	RP5-875O13.1;U1	2.87e-20
cg02456219	FRS3;TOMM6	2.88e-20
cg17015994	CYP11B1	2.9e-20
cg05346287	FIGNL1	3e-20
cg18663621	CTD-3080P12.3	3.04e-20
cg05354479	MAP3K9;RP6-65G23.3	3.06e-20
cg06042156	RP11-310H4.3	3.2e-20
cg16143804	MSH5;MSH5-SAPCD1	3.2e-20
cg10996148	MIR3183	3.24e-20
cg18174678	FOXJ3	3.24e-20
cg19150852	ABHD5	3.26e-20
cg12628075	OR14J1	3.3e-20
cg16957523	HS3ST1	3.3e-20
cg02516845	SLC38A8	3.31e-20
cg07059629	TRAV8-2	3.38e-20
cg01972979	MIR503HG;MIR503;MIR424	3.43e-20
cg10944063	AC013275.2	3.44e-20
cg15084269	STX6	3.46e-20
cg07696099	HPYR1	3.66e-20
cg21414251	OR12D2;OR12D2	3.66e-20
cg11989674	GPR155;AC010894.3	3.68e-20
cg13992911	RP11-43F13.4	3.69e-20
cg15186616	DLGAP2	3.96e-20
cg18369913	OR4C46	3.99e-20
cg15362155	SCGB1D4	3.99e-20
cg06589507	MGAT4B	4.03e-20
cg24898863	S100A8	4.07e-20
cg13593323	RP11-409K20.7	4.09e-20
cg02155398	Six3os1_2;Six3os1_3	4.13e-20
cg04626878	PTK6	4.18e-20
cg04515986	FTHL17	4.26e-20
cg05353872	OR2M3	4.35e-20
cg01793387	CCAR2	4.36e-20
cg27441409	S100A7L2	4.75e-20
cg00545916	HSF5	4.76e-20
cg14830002	OR2B11	4.87e-20
cg00766985	RPLP1	4.9e-20
cg20547131	MIR409;MIR412;MIR369;MIR410;MIR656	4.98e-20
cg03719128	ZEB1	5.2e-20
cg19562321	SLC36A2	5.4e-20
cg05346878	TACSTD2	5.44e-20
cg25985778	RPL38	5.59e-20
cg00715988	RP11-872J21.3	5.78e-20
cg21040360	TSSC1;TRAPPC12	5.8e-20
cg18899777	KB-1562D12.1	5.82e-20
cg24948406	HOXB1	5.84e-20
cg26492368	SPAG6	5.92e-20
cg22843797	TNFRSF10A	5.93e-20
cg19921377	ZNF358	5.93e-20
cg17978367	CTC-507E2.2	5.96e-20
cg20867746	OR51S1	5.99e-20
cg18247055	SPAG6	6e-20
cg26728422	AL031721.1	6.3e-20
cg18873097	FBXL5;FAM200B	6.43e-20
cg16506910	MIR30A	6.59e-20
cg05899471	SNORD114-29;SNORD114-30	6.69e-20
cg27462160	SPATA2L	6.84e-20
cg11946165	CTSK	6.91e-20
cg05798126	RNA5SP201	6.92e-20
cg25858249	PLEKHG1;RP11-136K14.1	7.05e-20
cg26640601	GCM2	7.06e-20
cg11517269	ZSCAN12P1	7.06e-20
cg02704570	AC011899.9	7.19e-20
cg02912371	SLC26A9	7.31e-20
cg20661138	AF186192.1;AF186192.5	7.37e-20
cg08668790	ZNF154	7.44e-20
cg07954324	CYP11B2	7.64e-20
cg11783264	SCAMP4;ADAT3	7.98e-20
cg25602765	VTRNA1-1	8.06e-20
cg04282788	SERTAD4-AS1	8.06e-20
cg02507167	RP11-503I22.2	8.14e-20
cg18405786	KLHL26	8.19e-20
cg16322014	DNHD1	8.21e-20
cg09577986	MIR7159	8.38e-20
cg00006626	NUP210L	8.55e-20
cg06962787	CDRT1	8.75e-20
cg15769388	A2ML1-AS2;A2ML1	8.82e-20
cg04244985	KIR3DX1	8.82e-20
cg08596532	CTD-2247C11.1;LINC01020	9.1e-20
cg22321318	AC006372.5	9.32e-20
cg17991695	GCM2	9.34e-20
cg07915635	MIR133A2	9.6e-20
cg06456717	RP11-815J4.5;ANKRD62	9.64e-20
cg08833577	VAX1	9.86e-20
cg06800840	OASL	9.9e-20
cg12488585	EP400	1.05e-19
cg20624923	PRLHR	1.05e-19
cg22531371	MUC1	1.06e-19
cg04534765	GALR1	1.1e-19
cg13734833	MRGPRF-AS1	1.13e-19
cg00497078	C14orf180	1.14e-19
cg25774643	CDHR5;SCT	1.19e-19
cg14054990	KRTAP19-5	1.2e-19
cg24314549	SLC43A2	1.25e-19
cg01923075	YBX1P2	1.25e-19
cg03295554	RP11-1007G5.2	1.25e-19
cg04107005	SPACA7	1.25e-19
cg16765387	RP11-834C11.14	1.28e-19
cg03731268	L1TD1	1.28e-19
cg23501610	PRAMEF11	1.35e-19
cg11323650	OR8J3	1.37e-19
cg24627299	MET	1.37e-19
cg03323462	RP11-445F12.2	1.39e-19
cg10000148	SNORD114-20;SNORD114-21	1.43e-19
cg21321815	RP4-726N1.2	1.44e-19
cg05226729	DEFB135	1.44e-19
cg09186818	MFRP;MFRP	1.48e-19
cg14253327	RP11-35N6.1	1.5e-19
cg02054568	LCE3D	1.55e-19
cg04547205	PLIN5	1.55e-19
cg12983285	PTK6	1.6e-19
cg09256941	GPR139	1.65e-19
cg25271892	CHRM1	1.65e-19
cg07981588	YWHAZ	1.68e-19
cg04907244	SNORD93	1.7e-19
cg14910227	MIR495	1.7e-19
cg01901466	CHGA	1.71e-19
cg04150495	MIR663A	1.77e-19
cg15962313	RP11-688I9.4;KIRREL3-AS2	1.78e-19
cg06768993	ACOX3	1.79e-19
cg18715665	LIG1;ZNF114	1.81e-19
cg11598872	FLJ45079	1.82e-19
cg16662451	FBXW10	1.84e-19
cg19876302	RP11-78A18.2	1.85e-19
cg14108978	RP11-800A3.7	1.86e-19
cg26116560	REEP1	1.87e-19
cg20218614	RP11-539E17.5	1.92e-19
cg25471443	SYTL1	1.94e-19
cg26328687	MAML2	1.98e-19
cg13983776	TPM3P9;ZNF761	2.02e-19
cg14666310	CEACAM7;AC011513.3	2.02e-19
cg03526459	RNVU1-8	2.09e-19
cg16458866	RP11-115D7.3	2.1e-19
cg00562430	LINC01299	2.13e-19
cg10460946	RP11-219G17.8	2.16e-19
cg21263710	RP11-25O3.1;DCC	2.17e-19
cg15927357	RP11-110H1.4;MIR1539;MIR1539	2.25e-19
cg13753460	MIR382;MIR134;AL132709.5;MIR485;MIR323B	2.25e-19
cg18322569	BARHL2	2.27e-19
cg15177359	UNC13D	2.31e-19
cg19315081	RP11-351I24.1;ADM	2.31e-19
cg19397885	VWDE	2.34e-19
cg23348723	PPP1R17	2.35e-19
cg24935042	CMPK2	2.36e-19
cg17156862	KLHDC7A	2.36e-19
cg26539023	LAD1	2.37e-19
cg19904653	BRF2	2.42e-19
cg12113101	IQSEC3	2.45e-19
cg13290149	RBBP8NL;RP5-908M14.5	2.46e-19
cg01827195	NYAP2	2.47e-19
cg01352906	RASSF5	2.54e-19
cg24298684	MC3R	2.55e-19
cg25591868	RGS16	2.65e-19
cg23245720	MIR503HG;MIR503;MIR424	2.7e-19
cg10207181	RP11-495P10.3;Y_RNA	2.73e-19
cg12528056	RP11-804A23.4	2.75e-19
cg01362243	Six3os1_2	2.76e-19
cg10689404	RP11-445F12.2	2.77e-19
cg02382532	C6orf132	2.77e-19
cg17297305	IVNS1ABP;GS1-279B7.2	2.78e-19
cg26444528	RP11-95F22.1	2.8e-19
cg01854491	MIR4664;FAM83H-AS1	2.82e-19
cg00170188	FAM171A2	2.83e-19
cg21246665	SERPINA10	2.85e-19
cg16108230	VGLL2	2.86e-19
cg13278100	PLEKHG1;RP11-136K14.1	2.86e-19
cg05452406	GCM2;RP11-637O19.2	2.88e-19
cg11393848	C1QC	2.89e-19
cg25792518	CHAD	2.93e-19
cg06203976	CADM3	2.94e-19
cg20778958	OR6P1	2.95e-19
cg13747967	CCL22	2.95e-19
cg18082788	ZC3H12D	3.03e-19
cg19328294	PRSS22	3.09e-19
cg23325963	Six3os1_2	3.17e-19
cg24173629	CTA-221G9.10	3.21e-19
cg17357062	FCN1	3.24e-19
cg06797253	LINC00229	3.24e-19
cg23149881	IL1B	3.26e-19
cg12169927	RP5-1106E3.1	3.31e-19
cg22370326	2019-09-10	3.35e-19
cg02151120	RP11-849H4.4	3.4e-19
cg03224418	SAMD10;PRPF6	3.5e-19
cg20312687	DEFB118	3.55e-19
cg14131220	CNTFR	3.56e-19
cg11807829	LNX1-AS2	3.64e-19
cg10469791	GRXCR1	3.69e-19
cg12571879	MCEMP1;CTD-3214H19.16	3.71e-19
cg08875705	IFFO1	3.72e-19
cg05292478	SMURF1	3.74e-19
cg10559633	SNORA46	3.84e-19
cg07520506	RP11-157G21.2	3.9e-19
cg14387505	AHSP	3.91e-19
cg20814718	UNC5D	4.07e-19
cg06499030	HLA-DQB2	4.09e-19
cg14267780	KRTAP5-4	4.1e-19
cg01772980	SCGB1D1	4.26e-19
cg05693204	CTD-2194D22.5	4.32e-19
cg06993413	DPP8	4.45e-19
cg24814257	CEACAM7;AC011513.3	4.47e-19
cg24304425	PRTN3	4.49e-19
cg01937809	LINC01137	4.55e-19
cg05174942	VTRNA1-2	4.57e-19
cg14435645	RP11-398J5.1	4.57e-19
cg24254206	SNRPD2	4.67e-19
cg13507224	OR10J3	4.68e-19
cg11924517	IL17A	4.68e-19
cg15811515	CTD-2014E2.5;CSDAP1	4.7e-19
cg26687072	HOXB1	4.73e-19
cg23928726	PEX10	4.75e-19
cg21151432	ADCY3	4.76e-19
cg10172675	LINC01181	4.78e-19
cg15466862	SOX1	4.84e-19
cg08288811	PCDHA3	4.88e-19
cg18537454	RP11-573G6.8	4.9e-19
cg15044270	TM4SF19-TCTEX1D2;TM4SF19	4.93e-19
cg04087271	CDA	4.99e-19
cg10752676	IQUB	5.14e-19
cg17522445	LIG1;ZNF114	5.34e-19
cg25384000	OR5D16	5.43e-19
cg02577745	MIR493	5.49e-19
cg23176663	IGHG4	5.51e-19
cg21090033	TM4SF19-TCTEX1D2;TM4SF19	5.55e-19
cg24563317	PRKDC;MCM4	5.55e-19
cg21328389	AP001331.1	5.66e-19
cg25848158	S100A10;AL591893.1	6.13e-19
cg17311726	MIR4456	6.2e-19
cg04255230	RP11-523H20.3	6.2e-19
cg15951188	KCNAB3	6.26e-19
cg00399374	ZFAND1;CHMP4C	6.28e-19
cg22665383	OR4C16;OR4C16	6.28e-19
cg12802086	MECR	6.36e-19
cg27029821	PRDM14	6.46e-19
cg02969706	LINC01105	6.52e-19
cg13195526	IL22	6.73e-19
cg20242797	GRHL3	6.73e-19
cg02660440	MIR199A1	6.77e-19
cg06708731	DBH	6.88e-19
cg03359095	RBBP8NL;RP5-908M14.5	7.05e-19
cg10791422	MRGPRD	7.22e-19
cg10087172	ARHGDIB	7.29e-19
cg03111498	VSX1	7.31e-19
cg04904276	RP11-490O6.2	7.35e-19
cg25196348	PDSS1	7.39e-19
cg11150901	KMO	7.41e-19
cg10647025	MIR892A;MIR892B	7.49e-19
cg10837843	DUSP1	7.52e-19
cg05413258	RBM44	7.56e-19
cg10022788	GNA15	7.67e-19
cg02983759	LINC00111	7.82e-19
cg26312920	NEUROD6	7.87e-19
cg25100532	RNF141;MRVI1-AS1	7.88e-19
cg18462653	DEFB119	7.93e-19
cg04528771	TP53I13	8.73e-19
cg19583265	NMS	9.15e-19
cg25326319	AC074389.7	9.17e-19
cg01031101	NKAPL	9.21e-19
cg03597347	ZSCAN12P1	9.23e-19
cg10499172	DCPS	9.23e-19
cg18547284	PIP	9.28e-19
cg12478185	SCO1	9.29e-19
cg04923174	OR10X1;OR10X1	9.31e-19
cg10118557	PTP4A3	9.44e-19
cg27017562	MAG	9.7e-19
cg00350199	ACY3	9.76e-19
cg22980079	FAM193A	9.81e-19
cg09001777	FUT3	9.81e-19
cg13078911	PDSS1P2;PPM1B	9.87e-19
cg02868468	C14orf180	9.9e-19
cg14175438	FAM3C;CYCSP19	1.02e-18
cg09829636	ANKRD9	1.02e-18
cg02989940	AHSP	1.04e-18
cg13316404	RN7SKP78	1.04e-18
cg25505610	EIF3M	1.06e-18
cg00529958	ZIC5	1.07e-18
cg19025113	RP11-89K21.2	1.08e-18
cg25351353	OR7E47P	1.08e-18
cg08719289	CITED4;RP5-1066H13.4	1.1e-18
cg03462130	FSCN1	1.1e-18
cg03658985	AVPR2	1.11e-18
cg01833923	ABI3	1.14e-18
cg02809611	OR1F1	1.14e-18
cg05535398	CTD-2035E11.4	1.18e-18
cg14924160	TPTE2P5;SUGT1P3	1.2e-18
cg12502815	RP11-123K3.9	1.2e-18
cg02169487	ANK3;RP11-131N11.4	1.21e-18
cg16659728	MRGPRD	1.22e-18
cg25076881	OR10J1	1.23e-18
cg01198033	AC008060.5	1.24e-18
cg14055835	FCAR	1.25e-18
cg16214492	TMC6	1.26e-18
cg12750151	OR5D18	1.26e-18
cg09432154	GPR87	1.28e-18
cg16353361	APLN	1.29e-18
cg02459416	TMEM88	1.31e-18
cg18639238	AC144450.1	1.31e-18
cg08259810	RP11-351I24.1;ADM	1.33e-18
cg27504738	RP11-745O10.4;TMBIM4	1.33e-18
cg04046669	HORMAD2-AS1;HORMAD2	1.34e-18
cg24136205	ZIC5	1.34e-18
cg26214026	AC002395.1	1.34e-18
cg07428782	AA06;RP11-31I22.4	1.37e-18
cg14669921	GPR75-ASB3	1.37e-18
cg21971621	SNX32	1.39e-18
cg15387123	CLIC3	1.41e-18
cg26522894	TMEM132D	1.41e-18
cg08502759	RNF141;MRVI1-AS1	1.43e-18
cg17723299	DENND1B	1.52e-18
cg03502002	GALR1	1.52e-18
cg04126335	ITGA10	1.52e-18
cg16150752	RP11-19O2.2	1.52e-18
cg20966659	NUP210P1	1.53e-18
cg23689219	OR10J1	1.53e-18
cg18486258	C6orf132	1.53e-18
cg01444574	POLR2D	1.53e-18
cg06365567	MIR425;NDUFAF3;MIR191	1.54e-18
cg03894990	SPATS1	1.57e-18
cg11851804	RP11-54O7.2	1.59e-18
cg03065625	LRP4	1.59e-18
cg03840467	RP11-285E9.6	1.63e-18
cg21439498	MZF1	1.63e-18
cg01979888	IFFO1	1.69e-18
cg26595643	VAX1	1.7e-18
cg26591982	SLC25A1P3	1.71e-18
cg17976205	RBBP8NL;RP5-908M14.5	1.71e-18
cg06391932	Six3os1_1;Six3os1_2	1.74e-18
cg01285756	POM121L1P	1.74e-18
cg04598121	RP11-17A4.2	1.84e-18
cg07039560	SLC25A2	1.85e-18
cg13420089	UNQ6494	1.85e-18
cg01268824	ZNF154	1.86e-18
cg24000937	ODF3L2	1.87e-18
cg16431978	KRTAP13-2;KRTAP13-3	1.87e-18
cg12065616	MIR5700	1.89e-18
cg17611742	DENND1B	1.9e-18
cg06379876	MIR30E	1.94e-18
cg24027965	LYPD6B	1.94e-18
cg04749104	STEAP3	1.96e-18
cg07857792	KCNN1	1.98e-18
cg15354065	WIBG	2.01e-18
cg22947965	OR8D4	2.01e-18
cg03625953	RP11-667K14.14	2.04e-18
cg12018809	LPAR5	2.05e-18
cg06594404	RP11-2H3.7	2.07e-18
cg00636194	WFDC6;HSPD1P21	2.08e-18
cg02537838	RBBP8NL;RP5-908M14.5	2.13e-18
cg04096519	RP11-804A23.4	2.14e-18
cg15593510	OR10T2	2.17e-18
cg24528164	RPP21	2.18e-18
cg19697558	GRHL3	2.23e-18
cg11357542	MEIS1-AS2	2.27e-18
cg24429159	MED4	2.38e-18
cg07414392	TJP2	2.39e-18
cg19811148	RP4-764D2.1	2.41e-18
cg12534759	OR4A15	2.46e-18
cg24387864	CCND1	2.46e-18
cg16072777	Y_RNA	2.48e-18
cg13636952	TRBV29-1	2.52e-18
cg23049458	L1TD1	2.52e-18
cg09487078	CCR6	2.53e-18
cg08610968	BNIP3	2.55e-18
cg05384868	CABLES1	2.57e-18
cg18552520	DNAJB1P1	2.59e-18
cg10521852	LPAR2	2.64e-18
cg19865770	C1orf140	2.68e-18
cg03816954	UCMA	2.71e-18
cg23907852	SPPL2C	2.77e-18
cg14957186	UNC5B-AS1	2.78e-18
cg03846249	RP11-143E21.3	2.81e-18
cg13409170	RP11-175D17.3	2.82e-18
cg13407464	CTD-2313J17.1;CTD-2313J17.6	2.82e-18
cg06634862	LNX1-AS2	2.84e-18
cg00250500	RP11-399K21.13	2.87e-18
cg08097817	KRTAP11-1	2.88e-18
cg06284901	ATXN1L;IST1	2.9e-18
cg19403534	PRLHR	2.94e-18
cg26977737	LINC00320	2.96e-18
cg15176213	COX7A1	2.96e-18
cg02564259	LCAT	2.97e-18
cg07313373	NLRP3	3e-18
cg16579438	THRB	3.02e-18
cg09936218	TRGV11	3.04e-18
cg10449091	ELFN1-AS1	3.06e-18
cg26425555	RP11-260E18.1;CTC-461F20.1	3.09e-18
cg19112186	CPT1B	3.14e-18
cg05363955	MIR4439	3.15e-18
cg09232937	IRX1	3.17e-18
cg25212131	SLC25A2	3.19e-18
cg23439141	LAMP1	3.2e-18
cg13327545	RP11-573G6.8	3.21e-18
cg10124440	USP5	3.24e-18
cg03714619	Six3os1_2;Six3os1_3	3.3e-18
cg06437799	YY1AP1	3.34e-18
cg20646544	STAU2	3.37e-18
cg25940557	OR10Z1	3.37e-18
cg17386213	OSTM1	3.44e-18
cg04866380	PPP1R17	3.49e-18
cg14187895	ERBB2	3.59e-18
cg09333392	OR4D2	3.63e-18
cg17029151	CHMP4C	3.64e-18
cg10894072	EPS15	3.68e-18
cg15947283	TRGV3	3.68e-18
cg27131891	AL021918.1	3.69e-18
cg14095048	TMEM211	3.74e-18
cg13592931	PCDHA10	3.82e-18
cg05965402	PI4K2B	3.81e-18
cg06871213	CIITA	3.84e-18
cg03551243	CATSPERD	3.97e-18
cg09968709	DEFB115	4.03e-18
cg06485101	GAA	4.1e-18
cg11940285	TRH	4.22e-18
cg11787694	ODF3L2	4.31e-18
cg21874404	SNORD112;MEG8_2	4.47e-18
cg26132774	RP11-52L5.6	4.47e-18
cg22801949	IER5	4.47e-18
cg20335425	S100A8	4.48e-18
cg06206357	MYL10	4.58e-18
cg10625266	RP4-612B15.3;SH3GLB1	4.6e-18
cg11718162	NUP210L	4.7e-18
cg09313046	AC009120.4	4.72e-18
cg20206277	LINC00111	4.75e-18
cg24627900	HPYR1	4.79e-18
cg15409097	ARHGEF25	4.79e-18
cg01323777	KCNAB3	4.8e-18
cg07999415	RP11-849H4.4	4.81e-18
cg13806095	TASP1	4.93e-18
cg12377139	SPAG6	4.98e-18
cg23831517	RPL10AP3	5.01e-18
cg11884243	FCN2	5.06e-18
cg02907064	MIR199A1	5.1e-18
cg12941836	RP5-966M1.6;MUSTN1	5.12e-18
cg18223379	BPIFB6	5.16e-18
cg24411961	AC115286.1	5.35e-18
cg12610471	SPAG6	5.37e-18
cg11398299	GLRXP3	5.4e-18
cg19164987	AC012531.25	5.54e-18
cg16205058	OSGEP	5.62e-18
cg09682848	RP13-895J2.9	5.67e-18
cg13356896	BOLL	5.76e-18
cg05780177	DENND1B	5.86e-18
cg26623286	MED31;C17orf100;C17orf100	5.94e-18
cg02531437	PRLHR	5.94e-18
cg12229082	ATG9B	5.95e-18
cg16118387	SERTAD4-AS1	6.02e-18
cg00221012	FSCN2	6.07e-18
cg08317412	PANX3	6.07e-18
cg00242951	LHFPL4	6.19e-18
cg14726581	SLC6A18	6.29e-18
cg06757585	PCDHGA6	6.38e-18
cg04481779	IL20RA	6.38e-18
cg25190001	WNT1	6.42e-18
cg19767477	LINC01184	6.43e-18
cg10009657	CREB3L3	6.45e-18
cg11816081	RP11-1079K10.5	6.53e-18
cg23652859	MGC2752	6.56e-18
cg17540499	MIR592	6.57e-18
cg09684846	TVP23A	6.58e-18
cg16182713	TRIM56	6.72e-18
cg09179046	MKL2	6.86e-18
cg26275799	RP11-244K5.6	6.87e-18
cg05316065	GSDMC	6.98e-18
cg12447832	TSSC1;TRAPPC12	7.04e-18
cg03100024	ZNF574	7.07e-18
cg14507845	RP11-473E2.4	7.13e-18
cg12085619	OR2T3	7.32e-18
cg10519368	PCDHA10	7.49e-18
cg27534912	CD1C	7.34e-18
cg00345522	NRXN1	7.49e-18
cg14638840	CHMP4C	7.54e-18
cg15686949	SUB1	7.62e-18
cg05046377	OR51A7	7.64e-18
cg24221648	RP11-52L5.6	7.76e-18
cg19440734	CAMP	7.87e-18
cg15697852	VTRNA1-2	7.89e-18
cg24701725	IGHA2	7.93e-18
cg02092102	RP11-309L24.6	7.96e-18
cg27342801	REG3A	7.97e-18
cg06776256	GPRC5A	8.11e-18
cg13617604	OR3A3	8.21e-18
cg11162104	RNA5SP75	8.33e-18
cg15907146	MIR3675	8.36e-18
cg26822501	Y_RNA;LTBP1	8.4e-18
cg16846514	TRIM64EP	8.42e-18
cg00466249	SLC38A10	8.52e-18
cg06123346	ATP4A	8.66e-18
cg23413497	IGHV3-37	8.66e-18
cg17501395	ZC3H12D	8.73e-18
cg10500219	SZT2	8.73e-18
cg27292079	CBFA2T3	8.76e-18
cg23464360	MAFA	8.81e-18
cg17131579	MIR6873;PFDN6;MIR6834	8.82e-18
cg26683398	LTC4S	8.88e-18
cg03440799	AXDND1	9.02e-18
cg01206410	NID1	9.03e-18
cg18268547	NPLOC4	9.31e-18
cg20597842	APOBEC1	9.36e-18
cg01081096	ATG9B	9.36e-18
cg04424621	HIST1H2BJ	9.52e-18
cg20640432	CREB3L3	9.53e-18
cg11950860	KPRP	9.66e-18
cg27226238	REG1P	9.67e-18
cg04042828	FAM160A1	9.91e-18
cg27000831	CCL8	9.96e-18
cg27574980	VWA7	1.02e-17
cg14191360	MET	1.03e-17
cg21594839	OC90	1.04e-17
cg23047544	MIR199A1	1.06e-17
cg01040585	PCGF2;PSMB3	1.08e-17
cg01959541	C6orf99	1.09e-17
cg07969769	PARP8	1.12e-17
cg23275158	ISM2	1.16e-17
cg12086028	VPS52	1.16e-17
cg14664412	CSTA	1.17e-17
cg09790325	AC022431.2	1.17e-17
cg02926005	ZNF593	1.19e-17
cg07240873	PCDHA10	1.2e-17
cg23581186	KRTAP21-2	1.2e-17
cg25991631	CTD-2281E23.1	1.2e-17
cg26456435	RP11-196G11.2	1.21e-17
cg18032812	RP13-580B18.1	1.23e-17
cg15878619	MDC1;TUBB	1.24e-17
cg25018951	PI4K2B	1.24e-17
cg13423140	AVPR2	1.24e-17
cg17737314	KDM4A	1.24e-17
cg06516947	ARHGAP8	1.25e-17
cg05396044	ZBTB37	1.25e-17
cg16812893	KRTAP15-1	1.27e-17
cg18594551	KRTAP23-1	1.29e-17
cg14676272	SNAI2	1.29e-17
cg19200814	RP11-728E14.3	1.32e-17
cg00255099	SLC6A18	1.32e-17
cg01881046	SNX25	1.33e-17
cg27227497	RP11-304L19.2	1.38e-17
cg15932961	LINC00885	1.38e-17
cg09020649	BAALC-AS1;FZD6	1.39e-17
cg19991916	PIGB	1.39e-17
cg12017745	SIPA1	1.39e-17
cg20839149	SH2D2A	1.4e-17
cg12506930	ZNF154	1.41e-17
cg02560808	VAC14	1.42e-17
cg23031135	MRGPRF-AS1	1.42e-17
cg20779334	RP11-503C24.1	1.42e-17
cg04911280	AARS2	1.43e-17
cg24123311	LIG1;ZNF114	1.45e-17
cg02583247	FGF6	1.47e-17
cg20539474	BPIFA4P	1.49e-17
cg22517388	CARTPT	1.51e-17
cg06896909	TMEM196	1.51e-17
cg02716556	MAK	1.57e-17
cg11226328	EPB41	1.59e-17
cg01881287	YBX1P2	1.6e-17
cg00246301	NMS	1.61e-17
cg17352045	PPP1R2P1	1.62e-17
cg24792113	TMPRSS11E	1.63e-17
cg09852221	SLC26A9	1.63e-17
cg20395967	MIR663A	1.64e-17
cg14417954	RP11-547D24.3;PRKCZ	1.67e-17
cg06783429	LRRC4	1.68e-17
cg15450139	ARHGDIB	1.69e-17
cg13605674	TM4SF19-TCTEX1D2;TM4SF19	1.7e-17
cg15613420	H2AFY	1.72e-17
cg05156901	CPT1B	1.72e-17
cg07352859	CTD-2555A7.1	1.73e-17
cg17067638	SNORD115-10	1.74e-17
cg10346364	AP003419.11;CLCF1;CTC-1337H24.4	1.76e-17
cg13586051	DNASE1L3	1.76e-17
cg12659981	TENM2	1.77e-17
cg07441518	PAUPAR	1.77e-17
cg02341759	RP11-553E24.1;AGBL1	1.78e-17
cg19826026	ARHGDIB	1.83e-17
cg26899156	FUT3	1.84e-17
cg01883662	TM4SF19-TCTEX1D2;TM4SF19	1.85e-17
cg04784410	SNORD113-4;SNHG23;SNORD113-5	1.85e-17
cg16233450	OR2T34	1.87e-17
cg13568258	EMP3	1.89e-17
cg03289416	SCAMP2	1.92e-17
cg16340422	PLD6	1.98e-17
cg08293303	RAB24	1.98e-17
cg27026371	OR10G4	1.99e-17
cg01792749	SCN10A	2.02e-17
cg17408527	ZSCAN18	2.03e-17
cg13745346	CBFA2T3	2.03e-17
cg12048674	SLC45A3	2.04e-17
cg18456942	DEFB118	2.08e-17
cg07149785	CCND1	2.09e-17
cg24735489	CDSN	2.15e-17
cg24168221	CST9	2.15e-17
cg26862316	AKT2	2.16e-17
cg02207219	TRIM31	2.18e-17
cg03918703	MIR208B	2.19e-17
cg09577651	RP4-576H24.4;SIRPB1	2.2e-17
cg14569837	OR5AS1	2.2e-17
cg05433557	MIR595	2.21e-17
cg23089825	PRRX1	2.23e-17
cg04127342	RP11-17A4.2	2.23e-17
cg14698339	AC010761.6	2.25e-17
cg04653012	CFAP20;RP11-459F6.3	2.26e-17
cg26165146	ARNTL2	2.33e-17
cg19521511	ZNF716	2.34e-17
cg12640000	L1TD1	2.34e-17
cg22238692	CST4	2.35e-17
cg26767544	AC100830.4	2.35e-17
cg14121103	ABHD5	2.42e-17
cg15839431	YJEFN3	2.43e-17
cg23713249	GIMAP5	2.47e-17
cg04863713	ADAMTSL4	2.47e-17
cg21892973	CLCN4	2.48e-17
cg23737737	IFFO1	2.52e-17
cg17243289	SMAD2	2.52e-17
cg01699298	CBLN4	2.53e-17
cg26379822	LINC01010	2.53e-17
cg03216043	MIR199A1	2.54e-17
cg11324259	CYP11B2	2.54e-17
cg06345789	CTD-2020K17.4;MAP3K14-AS1	2.56e-17
cg00038857	CCL8	2.57e-17
cg25221254	ACER1	2.63e-17
cg04399632	TXNDC11	2.67e-17
cg05040210	KLHDC7A	2.69e-17
cg20122727	BTC	2.76e-17
cg21936959	MRGPRF	2.74e-17
cg24640676	KRTAP10-9	2.76e-17
cg16221240	RHOQP3	2.77e-17
cg12897947	TMC8	2.8e-17
cg17273588	AFF3	2.83e-17
cg01561719	ANKRD22	2.87e-17
cg24240626	REG3A	2.89e-17
cg17208360	SNORD115-37;SNORD115-38	2.89e-17
cg18114463	TMEM240	2.96e-17
cg26808687	RP11-465N4.4;RP11-510N19.5	2.97e-17
cg26548101	LINC00493;DTD1	2.98e-17
cg15556672	MRPS36	2.98e-17
cg17712694	RP11-19O2.2	3.03e-17
cg04358246	RP11-274J16.5;C9orf89	3.03e-17
cg19717640	LRIT2	3.1e-17
cg03433699	ALOX12-AS1;C17orf49	3.12e-17
cg20440575	CCNB1	3.14e-17
cg18432451	RP11-326N17.2	3.15e-17
cg22747516	NLRP11	3.17e-17
cg06610559	RP11-666A8.8;SNORD1C	3.18e-17
cg24843157	CTD-2588C8.8;UBA2	3.27e-17
cg26608199	F10	3.28e-17
cg20413202	RBP7	3.29e-17
cg01077058	OTOS	3.29e-17
cg17811845	GTF2B	3.29e-17
cg13708301	TJP2	3.3e-17
cg25473438	TREML2	3.3e-17
cg01291856	FAM99B	3.3e-17
cg09480855	RP11-490O6.2	3.38e-17
cg15540820	EOMES	3.4e-17
cg03234702	HIST1H3E	3.43e-17
cg26202762	SNORD115-10	3.46e-17
cg15298173	RP11-300A12.2;TUBBP8	3.47e-17
cg00144335	Z95704.3	3.47e-17
cg24858591	KIAA1143;KIF15	3.5e-17
cg14577406	RP11-120J1.1	3.51e-17
cg12091642	SALRNA1	3.53e-17
cg02631126	ZSCAN12P1	3.56e-17
cg05924780	LPAR5	3.61e-17
cg19808847	SNAI2	3.62e-17
cg00909706	MIR34A	3.62e-17
cg09004581	MTO1	3.78e-17
cg07841385	TUBB	3.79e-17
cg08954353	RP11-875O11.2	3.83e-17
cg11253042	LINC00700	3.84e-17
cg04108502	CDK2;RP11-973D8.4	3.87e-17
cg02011953	RP11-35N6.1	3.89e-17
cg11405655	RP11-54O7.18	3.93e-17
cg07823492	HOXB1	4.01e-17
cg13821038	WDR88	4.03e-17
cg05138957	MIR377	4.15e-17
cg22449745	CDCA8	4.19e-17
cg24112562	SIM2	4.2e-17
cg23035602	TPM3P9;ZNF761	4.28e-17
cg26810908	ZP4	4.29e-17
cg15893493	RP11-539E17.5	4.29e-17
cg15888097	HTR1E	4.31e-17
cg08042322	RP11-650K20.3	4.34e-17
cg10940251	MIR208A	4.36e-17
cg01176433	RP11-253M7.4;RP11-279F6.1	4.36e-17
cg14202757	RBP7	4.41e-17
cg17612147	SPPL2C	4.43e-17
cg10310595	HLA-DMB	4.44e-17
cg12475507	TP73	4.44e-17
cg05124918	OR7E47P	4.47e-17
cg05572621	KRTAP6-2;KRTAP22-1	4.48e-17
cg08260245	CPT1B	4.49e-17
cg01084740	TMEM30B	4.5e-17
cg25128583	CST2	4.51e-17
cg00536910	AF067845.1	4.52e-17
cg02131862	KRTAP24-1	4.6e-17
cg06846214	OR2T6	4.62e-17
cg21988972	AFF3	4.62e-17
cg08678055	TBC1D21	4.7e-17
cg06010111	TSGA10;LIPT1;RP11-38C17.1	4.76e-17
cg17752291	DOPEY2	4.77e-17
cg26529044	FAM216B	4.91e-17
cg17347178	DND1	4.97e-17
cg13106758	RP11-424I19.2	5e-17
cg26043322	OR10J5	5.17e-17
cg22026150	PSAT1P1	5.25e-17
cg08750061	IL13RA1	5.27e-17
cg07023327	GBAS;MRPS17	5.3e-17
cg06968788	SDC4P	5.35e-17
cg16242238	CGB8;CTB-60B18.15	5.36e-17
cg16705627	SOX1	5.38e-17
cg00983904	IFFO1	5.42e-17
cg00769810	RP11-301M17.1	5.46e-17
cg06430061	POC5	5.49e-17
cg23049429	RP11-88E10.5	5.5e-17
cg16362141	UBE2H;RP11-306G20.1;Y_RNA	5.51e-17
cg06393354	OR2M3	5.54e-17
cg26945941	RP11-117L5.3	5.54e-17
cg03564727	KCNA7	5.54e-17
cg15647311	CTD-2659N19.9;MIR5684	5.57e-17
cg22981296	RASD1	5.57e-17
cg02973993	COMMD7	5.59e-17
cg06762176	TRGV3	5.6e-17
cg02005771	REG3A	5.77e-17
cg23968678	MBOAT7;TSEN34	5.8e-17
cg15552491	NLRX1	5.88e-17
cg12618806	DLGAP2	5.9e-17
cg21950166	SFN	5.91e-17
cg17551002	OR6Y1	5.93e-17
cg05733285	WFDC6	5.95e-17
cg26610167	PTPRH	5.99e-17
cg11234637	RP11-348J12.2;CYP26C1	6.04e-17
cg00363813	IFFO1	6.09e-17
cg08215191	FAM124A	6.13e-17
cg20542190	LILRA4	6.16e-17
cg05740582	HPYR1	6.26e-17
cg21607649	GPR123	6.37e-17
cg09999582	TMEM182	6.37e-17
cg11037477	AC019131.1	6.38e-17
cg16870215	C4orf26	6.4e-17
cg00892368	PPP1R2P1	6.53e-17
cg04837071	EXD3	6.69e-17
cg21158815	BATF	6.73e-17
cg18705909	PCDHGA6	6.74e-17
cg00451388	KCNF1	6.78e-17
cg15825304	RNPEPL1	6.82e-17
cg24390913	VAX1	6.83e-17
cg05079547	NTM	6.92e-17
cg25765027	pRNA	6.92e-17
cg11557553	CTD-2228K2.2	6.92e-17
cg05208878	PRAME;LL22NC03-63E9.3	6.93e-17
cg14167629	GRHL3	6.96e-17
cg15852352	OR10T2	7.04e-17
cg09556286	GPR110	7.04e-17
cg07583137	CHMP4C	7.1e-17
cg16118592	TMED11P	7.15e-17
cg10688500	CCNC	7.17e-17
cg00575744	HLA-DMB	7.2e-17
cg14974147	FBXO40	7.28e-17
cg00744433	CXADR	7.28e-17
cg23621013	FAM180A	7.35e-17
cg14377951	GSTM5	7.35e-17
cg00129196	WDR35;AC079145.4	7.45e-17
cg16468773	ZFAND1;CHMP4C	7.45e-17
cg11823511	BARHL2	7.66e-17
cg16345647	RIPPLY3	7.8e-17
cg20288341	XXbac-BPG32J3.20;LY6G6E;LY6G6D	7.84e-17
cg08200869	AC005618.9	7.84e-17
cg09904358	RP11-183E9.2	7.89e-17
cg03685774	CFAP45;MIR4259	7.98e-17
cg17885542	GRHL2	8e-17
cg08737815	SDHB	8.01e-17
cg09258315	RP11-358D14.3	8.11e-17
cg11274778	BPIFA4P	8.2e-17
cg12910806	CNST	8.2e-17
cg03688818	APEH	8.66e-17
cg01287000	AF186192.6	8.66e-17
cg01798261	NKX2-4;RP11-227D2.3	8.69e-17
cg04281261	LINC00658;RP5-828H9.1	8.75e-17
cg27117476	RPL10L	8.75e-17
cg21207403	OR2L3	8.84e-17
cg15875904	RP3-513G18.2	8.92e-17
cg05592245	REEP3	8.97e-17
cg13935485	LINC01377	9.1e-17
cg17799287	MIR17;AL162375.1;MIR19A;MIR20A;MIR19B1;MIR92A1	9.11e-17
cg02975060	MIR1185-2;MIR381HG	9.15e-17
cg20014596	DIP2B	9.25e-17
cg18801579	RP11-43F13.4	9.27e-17
cg18815018	TRAV8-2	9.28e-17
cg07786254	MZF1	9.31e-17
cg07560174	RPL11	9.61e-17
cg19514854	KRT15	9.62e-17
cg16476048	TEX36;RP11-383C5.3	9.62e-17
cg16033151	RP11-68I3.5	9.7e-17
cg04902327	TRIM58	9.79e-17
cg09851951	RP11-434E6.4	9.88e-17
cg06854487	AP002490.1;LRTOMT	9.92e-17
cg04997124	SNORD113-2	9.93e-17
cg18969232	RP11-89K21.2	1e-16
cg24258592	RAB11FIP2	1.01e-16
cg26995656	CTD-2007A10.1	1.01e-16
cg03875678	GZMB	1.01e-16
cg09135399	APOBEC3H	1.01e-16
cg03139053	SATB2-AS1	1.02e-16
cg18122767	DLK1	1.03e-16
cg23097499	MIR7846;TNFRSF1B	1.03e-16
cg10919344	OR5A1	1.04e-16
cg24364398	REEP1	1.05e-16
cg20879468	SEC24A	1.05e-16
cg21000072	TP73	1.07e-16
cg01807825	GK2	1.08e-16
cg13674558	UBE3D;DOPEY1	1.1e-16
cg19409026	KDM4E	1.12e-16
cg24729498	PDE6B	1.12e-16
cg07833342	RP5-828H9.1	1.13e-16
cg05661282	ZNF154	1.14e-16
cg17880320	RP11-574F21.3;PEX19	1.15e-16
cg27664407	C16orf89	1.15e-16
cg08393041	ZIC1	1.17e-16
cg25577367	OR6M1	1.17e-16
cg10038618	TP73	1.19e-16
cg00303378	C1orf204	1.19e-16
cg24861272	ZEB1	1.21e-16
cg10211252	ZNF488	1.21e-16
cg17849569	ZSCAN12P1	1.21e-16
cg26534425	IL18	1.22e-16
cg01579370	DUXAP2	1.23e-16
cg00888561	WDFY2	1.23e-16
cg00305947	MC5R	1.24e-16
cg20938170	MOGAT2	1.26e-16
cg13018120	CD300E	1.26e-16
cg27074221	MIR495	1.27e-16
cg15147833	OR1C1	1.28e-16
cg23281327	LINC00700	1.29e-16
cg04637704	TNPO3;TPI1P2	1.3e-16
cg02927821	KRTAP2-3	1.31e-16
cg11294513	ZNF154	1.31e-16
cg03291336	ANP32A	1.32e-16
cg03595580	BRI3	1.32e-16
cg25210835	GSTM5	1.33e-16
cg01533082	RP11-349A22.2	1.34e-16
cg07149609	PRRX1	1.35e-16
cg01184591	GUSBP10	1.35e-16
cg06463958	T	1.35e-16
cg01994290	PLEKHG3	1.35e-16
cg12820134	RP11-669N7.2	1.36e-16
cg20585530	SIX6	1.36e-16
cg05616355	PANX3	1.36e-16
cg22730412	LINC01562;RNF11	1.4e-16
cg05772125	AHSP	1.42e-16
cg09508275	OR8H3	1.45e-16
cg21789085	MIR7160	1.48e-16
cg10251217	TAT	1.48e-16
cg25119415	MNDA	1.5e-16
cg23088126	RP11-564A8.8	1.51e-16
cg11343464	RP11-309L24.6	1.51e-16
cg00629688	GRIA4	1.51e-16
cg10956860	GOLPH3	1.52e-16
cg21792737	NOX3	1.53e-16
cg09192940	ARHGDIG	1.53e-16
cg08585489	MAG	1.54e-16
cg06866232	OR51L1	1.54e-16
cg17890928	CHAD	1.55e-16
cg25110423	ADCY10P1	1.55e-16
cg11348165	SFN	1.55e-16
cg00073460	ZC3H12D	1.55e-16
cg16491668	RP4-601P9.2	1.58e-16
cg20850602	MED9	1.58e-16
cg19720260	NXPE2	1.64e-16
cg22417613	RNU6-1272P	1.64e-16
cg09142144	CAPSL	1.65e-16
cg26024682	MIR670	1.67e-16
cg05667197	PIP	1.68e-16
cg24445674	CTAGE1;RP11-863N1.4	1.69e-16
cg00983948	CACYBPP3	1.69e-16
cg03198372	KREMEN1	1.69e-16
cg01109256	RALGAPB	1.7e-16
cg18443412	CXCR4	1.7e-16
cg05127924	FBXW10	1.7e-16
cg20978600	ZNF621	1.71e-16
cg25323709	POF1B	1.72e-16
cg15231462	OR2G3	1.72e-16
cg02975107	2019-09-09	1.74e-16
cg12178431	FGD5	1.74e-16
cg07050869	SNORD115-7	1.76e-16
cg21790626	ZNF154	1.76e-16
cg06083483	CCL8	1.76e-16
cg08668316	RP11-2H3.7	1.76e-16
cg07431522	TVP23BP1	1.77e-16
cg08080145	RAB37	1.78e-16
cg21541912	SCGB2A2	1.8e-16
cg19973659	TMCC1;TMCC1-AS1	1.81e-16
cg19591908	SNORD114-31;SNORD113	1.82e-16
cg17729941	S100A13;RP1-178F15.5;RP1-178F15.4	1.84e-16
cg18657389	EVPL	1.84e-16
cg05006384	SYNE3	1.84e-16
cg03333149	OR7E47P	1.86e-16
cg18646828	SNORD114-31;SNORD113	1.87e-16
cg18440069	MIR379;MIR411;MIR299	1.87e-16
cg04251307	STYK1	1.88e-16
cg07376374	RP4-705O1.1	1.88e-16
cg16121136	RP5-881L22.5;HNF4A	1.97e-16
cg00007076	RRS1-AS1;ADHFE1	1.98e-16
cg02576092	SYTL1	1.99e-16
cg04505023	SPRR1A	2e-16
cg13234062	FOSL1	2e-16
cg16872520	P2RY2	2e-16
cg07994661	FHDC1	2.01e-16
cg06433467	CTC-537E7.3	2.03e-16
cg26386189	FAM99B	2.03e-16
cg06376426	RP11-10N16.3	2.08e-16
cg18857759	OR2L8;OR2L8	2.09e-16
cg24766553	FOXR1	2.15e-16
cg09798801	TERF1P3	2.16e-16
cg25242988	OR7G2	2.18e-16
cg20052865	SNORD114-1	2.2e-16
cg23857976	VEZF1;RP11-159D12.3	2.2e-16
cg22960952	C4orf26	2.2e-16
cg13014709	2019-03-09	2.21e-16
cg07405182	RP11-115D7.3	2.22e-16
cg06875754	AMPD3	2.25e-16
cg19250571	OR51S1	2.3e-16
cg07037019	OR10J5	2.36e-16
cg06789519	LINC00354	2.36e-16
cg01686463	AC074389.7	2.37e-16
cg25388528	KRTAP6-1;KRTAP20-1	2.37e-16
cg13492337	PXDNL	2.4e-16
cg26954695	MZF1	2.4e-16
cg08258922	RAP2CP1	2.41e-16
cg19713196	LAD1	2.43e-16
cg26753302	SERPINB5	2.43e-16
cg15076824	CRP	2.44e-16
cg11796455	GCM2	2.44e-16
cg27298639	SPANXN4	2.44e-16
cg22032900	ATP11AUN	2.48e-16
cg00876267	AL590226.1	2.5e-16
cg25200152	RP11-495P10.4	2.53e-16
cg01518591	OR10C1	2.55e-16
cg03465179	IGHA2	2.55e-16
cg04087789	RP11-902B17.1	2.56e-16
cg09554951	KCNQ1DN;KCNQ1DN	2.58e-16
cg14638209	RP11-254F7.4	2.58e-16
cg16184827	CNGA3;AC092675.4	2.59e-16
cg27555365	TMEM102	2.62e-16
cg18588811	MIR496;MIR377	2.63e-16
cg17025555	OR6K6	2.64e-16
cg23365801	KCNAB3	2.67e-16
cg24629972	POTEA	2.69e-16
cg00982519	SFTA1P	2.69e-16
cg27149471	OR5T1	2.71e-16
cg00744739	PRR21	2.72e-16
cg03882071	SPPL2C	2.73e-16
cg13554744	RP11-134G8.7	2.74e-16
cg18325389	CAPZA2	2.77e-16
cg07786675	SFN	2.77e-16
cg10436333	FLJ16779	2.77e-16
cg01704580	RASD2	2.8e-16
cg00471000	BPIFB6	2.84e-16
cg22973115	N6AMT1	2.84e-16
cg25518365	RP11-618K13.2;C11orf94	2.85e-16
cg03168749	OR8B12	2.85e-16
cg10278025	OR12D3	2.87e-16
cg11272232	C19orf33	2.88e-16
cg27409991	RP11-372E1.7;PAQR9-AS1	2.89e-16
cg12861170	YJEFN3	2.9e-16
cg03234186	ZNF154	2.91e-16
cg05658811	SCGB1D4	2.93e-16
cg12351856	SNRPD1	2.94e-16
cg02303068	RP13-507P19.2	2.94e-16
cg18057469	XXbac-BPG300A18.13	2.95e-16
cg03265268	DEFB135	3e-16
cg09965939	NIPAL2	3.03e-16
cg15551105	RP11-254F7.4	3.03e-16
cg11932205	NME8	3.04e-16
cg16686158	HORMAD2-AS1;HORMAD2	3.04e-16
cg06579354	CYP2F1	3.05e-16
cg24998770	NME8	3.06e-16
cg13289364	OR4A47	3.06e-16
cg12662162	C6orf106	3.08e-16
cg01493517	IFFO1	3.08e-16
cg15905666	OR4C12	3.08e-16
cg06244417	FCN1	3.08e-16
cg19242688	GNG8	3.1e-16
cg00526711	AC068831.3	3.11e-16
cg01220257	MIR8085	3.11e-16
cg18997129	EPHA1	3.11e-16
cg23051392	C1QTNF3	3.12e-16
cg24864399	CTD-2533K21.3;CTD-2533K21.2	3.12e-16
cg20980271	RP11-475E11.9;CLCC1	3.12e-16
cg05400869	S100A7L2	3.12e-16
cg24145481	KRTAP25-1	3.12e-16
cg14055212	LHFPL3-AS1	3.12e-16
cg04612444	RP11-17A4.2	3.18e-16
cg11732925	MYO7B	3.25e-16
cg20323571	MIR488	3.27e-16
cg14294096	MIR670	3.3e-16
cg22908616	DNHD1	3.3e-16
cg10517650	SPICE1	3.31e-16
cg20171999	RRS1-AS1	3.32e-16
cg16026035	RP11-136K7.2	3.33e-16
cg08970655	OR1L3	3.33e-16
cg16745033	TPD52	3.35e-16
cg18418479	MINK1	3.36e-16
cg10172584	YJEFN3	3.45e-16
cg25147941	CTD-2313P7.1	3.51e-16
cg14143326	EGFL7	3.55e-16
cg03579179	VWDE	3.56e-16
cg02245566	OR6K2	3.57e-16
cg12111295	KRTAP11-1	3.6e-16
cg14609407	SLPI	3.61e-16
cg10407113	AP1G1	3.65e-16
cg23869158	LRCH1	3.71e-16
cg05818824	SCN4A	3.72e-16
cg17129400	NCOA6	3.73e-16
cg05053440	RNA5SP77	3.74e-16
cg14361526	MIR381;MIR487B;MIR539;MIR889	3.74e-16
cg04741366	LINC01304	3.77e-16
cg13977486	C10orf95	3.77e-16
cg06073348	RP11-351I21.7	3.78e-16
cg27444644	OR8H2	3.79e-16
cg16587832	RP11-264M12.4	3.79e-16
cg23205886	SNORA74	3.8e-16
cg06154311	RBBP8NL;RP5-908M14.5	3.8e-16
cg01132653	MIR411;MIR299;AL132709.2	3.81e-16
cg12690127	U47924.31;PTPN6	3.82e-16
cg16620283	SNORD11B;SNORD11	3.84e-16
cg09842118	RNASE3	3.88e-16
cg16477744	MIR153-2	3.88e-16
cg13246026	TAS1R3	3.9e-16
cg06543101	KCNK16	3.9e-16
cg00637688	SLC25A48	3.91e-16
cg25330366	VPREB1	3.93e-16
cg24560288	CYB561A3	3.96e-16
cg16513459	KCNAB3	4.1e-16
cg14096180	AP003419.11;CLCF1;CTC-1337H24.4	4.13e-16
cg04236329	EXOC3-AS1;EXOC3	4.13e-16
cg12547930	WFDC6;HSPD1P21	4.13e-16
cg20978230	MIR503HG;MIR503;MIR424	4.14e-16
cg03314644	HEATR5A	4.19e-16
cg21640994	CTD-2095E4.5	4.19e-16
cg14696870	FCER1A	4.21e-16
cg23016129	SPAG6	4.27e-16
cg09068447	KATNBL1	4.28e-16
cg24805759	CTD-2529O21.2	4.29e-16
cg15850739	GOLGA6L2	4.29e-16
cg18736063	NKX2-4;RP11-227D2.3	4.33e-16
cg06943309	RP11-408E1.1	4.33e-16
cg21899542	ATP5G1P1	4.33e-16
cg04910970	PRDM13	4.37e-16
cg04513422	LINC00346	4.38e-16
cg02944238	LINC00922	4.44e-16
cg17515024	AL139288.1;HIST3H2BB	4.46e-16
cg06603828	RPS14	4.48e-16
cg17030173	RP11-19O2.2	4.48e-16
cg17463698	WHAMM	4.56e-16
cg01020987	LINC01134	4.59e-16
cg13651876	CHCHD4P3	4.77e-16
cg16465407	AC096553.5	4.78e-16
cg17155417	SLC25A5P3	4.79e-16
cg15016120	DCD	4.85e-16
cg06836338	GID4	4.86e-16
cg06360427	GALR1	4.88e-16
cg12740337	ZSCAN12P1	4.9e-16
cg02387612	OR8H3	4.91e-16
cg09807914	OR4A15	4.91e-16
cg22496559	TM4SF19-TCTEX1D2;TM4SF19	4.94e-16
cg22566740	KRT5	4.94e-16
cg04898939	SMG1P5;RP11-347C12.12	4.95e-16
cg06161630	EPHA1	4.95e-16
cg21349914	CTNNA2	4.96e-16
cg07992308	KCNA7	4.99e-16
cg08340277	POLR3A	5.06e-16
cg20012024	F11R	5.13e-16
cg22033759	TUSC5	5.16e-16
cg26874764	ZNF735	5.16e-16
cg02377900	RP11-360L9.8	5.19e-16
cg06805546	TAGAP	5.21e-16
cg26611683	FOXO1	5.21e-16
cg14435109	SGPP2	5.25e-16
cg27098574	RP11-331F4.5	5.26e-16
cg18449120	LINC01248;AC108025.2;SOX11	5.32e-16
cg11776124	ZBTB11-AS1	5.35e-16
cg03407567	MYL6B	5.38e-16
cg21119375	PDSS1P2;PPM1B	5.38e-16
cg12374721	PRAC1;PRAC2;HOXB13-AS1_1;HOXB13-AS1_2	5.41e-16
cg27083614	AC005777.3	5.41e-16
cg18294257	SEC14L3	5.43e-16
cg11164441	RP11-1191J2.5	5.48e-16
cg09924998	RP11-512M8.5;VPS33A	5.48e-16
cg03136712	DND1	5.5e-16
cg26272575	KIF16B;RP4-777L9.2	5.53e-16
cg15986919	TMEM190	5.55e-16
cg08928408	WWTR1	5.59e-16
cg06575425	FER1L4	5.59e-16
cg19011552	MIR514A2	5.62e-16
cg18351099	ZNF845	5.63e-16
cg24314434	FUT3	5.66e-16
cg19996355	PBX4	5.67e-16
cg19402335	OR10J1	5.68e-16
cg14062083	KRTAP13-4	5.77e-16
cg01972009	PITPNM1	5.83e-16
cg25019567	RP11-385M4.2	5.89e-16
cg13972491	MIR3074	5.9e-16
cg04027961	AC021021.2	5.96e-16
cg00910338	SNORD114-6	6.02e-16
cg17187764	APOBEC1	6.04e-16
cg21932814	CSTA	6.1e-16
cg22708944	TBC1D21	6.1e-16
cg10563714	FABP5	6.14e-16
cg18384960	MIR411;MIR299;AL132709.2	6.16e-16
cg18221168	OGDHL	6.2e-16
cg02641539	DCSTAMP	6.2e-16
cg01141459	HORMAD2-AS1;HORMAD2	6.3e-16
cg03772909	PRR23A	6.32e-16
cg02764897	KRTAP13-1	6.33e-16
cg13438893	RP11-52L5.6	6.34e-16
cg02919422	SOX17	6.35e-16
cg22691587	TRIT1	6.4e-16
cg04764056	CLC	6.41e-16
cg18254356	ANXA2R	6.42e-16
cg01509243	RP11-982M15.7	6.42e-16
cg03803009	GPR142	6.45e-16
cg00359661	BMP6	6.53e-16
cg00510689	FAM71B	6.56e-16
cg19772011	GLP1R	6.62e-16
cg15239904	RP3-481F12.1	6.66e-16
cg14819820	OR4D2	6.72e-16
cg16703956	SLC6A3	6.73e-16
cg22118126	LPIN3	6.74e-16
cg07783666	CTB-31O20.4	6.74e-16
cg27049766	ZNF154	6.75e-16
cg01609275	RPL29P3	6.77e-16
cg22920417	AC034110.1	6.78e-16
cg19657814	GNG8	6.88e-16
cg23906738	NKX2-1-AS1	6.96e-16
cg15975802	U47924.31;PTPN6	6.99e-16
cg15855336	SAMD10;PRPF6	7.03e-16
cg03719978	TMEM88	7.04e-16
cg00412772	C19orf33	7.05e-16
cg05802386	SLC2A1-AS1	7.11e-16
cg27526346	RP11-556G22.2	7.13e-16
cg25404995	RP11-200A13.1	7.16e-16
cg25562834	RP11-902B17.1	7.31e-16
cg03261155	S100A7L2	7.35e-16
cg03589751	MIR549A	7.35e-16
cg09248007	MKL2	7.36e-16
cg02901136	S100A12	7.42e-16
cg03441250	MIR1253	7.49e-16
cg07471018	COX7B2	7.51e-16
cg15233880	CCND1	7.55e-16
cg03857640	RP11-46D6.4	7.7e-16
cg21013206	DRD2	7.73e-16
cg22203219	IFFO1	7.77e-16
cg01784614	CARD6	7.88e-16
cg01733284	OR10K2	7.92e-16
cg08370178	CTD-2035E11.4	7.93e-16
cg04958703	SLC25A11	7.94e-16
cg05754905	F11R	7.94e-16
cg03368046	FAM186A	7.94e-16
cg10055265	RP11-334E6.12	7.99e-16
[truncated: 69,836 more rows]

## Sheet: BRCA
probe	gene	adj.P.Val
cg18265162	SERTAD4-AS1	1.38e-185
cg14789818	RNA5SP77	7.51e-181
cg20699586	RNA5SP77	3.73e-167
cg18675097	NKAPL	8.68e-165
cg27616751	CLDN15	1.44e-160
cg02196651	LNX1-AS2	1.51e-141
cg25790133	FAM193A	2.17e-141
cg04009429	CLDN15	5.95e-140
cg01817009	LCAT	5.98e-139
cg09851343	LMF1-AS1	5.65e-137
cg22954906	METTL21EP	1.65e-136
cg15084543	ELTD1	7.66e-133
cg10172584	YJEFN3	1.15e-132
cg14231297	ZSCAN18	2.43e-132
cg08296903	CTD-2135D7.2	3.64e-128
cg22871253	EZR-AS1	8.73e-128
cg07651914	CLDN15	1.23e-127
cg10628699	METTL21EP	1.98e-127
cg19593741	SAPCD1-AS1	2.44e-127
cg26180469	AP001453.1	1.72e-126
cg17391620	SAPCD1-AS1	3.29e-126
cg00909706	MIR34A	8.45e-126
cg09085792	MIR944	8.96e-126
cg23746497	LINC00577	1.47e-123
cg05937737	SLC7A14	3.57e-123
cg26444528	RP11-95F22.1	5.04e-123
cg01877606	LNX1-AS2	2.01e-121
cg21158815	BATF	2.85e-121
cg21048162	BATF	1.54e-120
cg05083414	FAM193A	3.72e-120
cg05949640	FAM193A	3.53e-119
cg22531371	MUC1	4.5e-119
cg03738025	LINC00577	1.19e-118
cg11366178	LNX1-AS2	2.35e-118
cg23287992	SAPCD1-AS1	1.07e-117
cg02578944	NKAPL	1.33e-117
cg22637867	ZNF709	4.35e-117
cg07599144	AC135048.13;ORAI3	5.09e-117
cg14856606	C4BPA	1.04e-116
cg25876656	SERTAD4-AS1	2.76e-116
cg12861170	YJEFN3	2.94e-116
cg03998066	TGFB1I1	3.26e-116
cg25631489	PHC3	4.21e-116
cg02264079	RP11-196G11.2	5.05e-116
cg26683398	LTC4S	6.21e-116
cg04096519	RP11-804A23.4	1.21e-115
cg06546469	AC018685.2	9.63e-115
cg08566455	RHOQP3	2.08e-114
cg05845376	SLC25A2	2.68e-114
cg22188918	CLDN15	3.68e-114
cg14266527	MAB21L2	3.45e-113
cg10424681	C6orf201	6.5e-113
cg24604013	SOX1	1.33e-112
cg20395967	MIR663A	1.92e-112
cg11807829	LNX1-AS2	6.16e-111
cg17508591	PCDHA7	1.52e-110
cg04224064	NKX2-1	1.6e-110
cg26687173	WDR88	2.44e-110
cg04472592	KRT80	4.38e-110
cg10659886	ZSCAN18	4.76e-110
cg25352836	NDUFA13;CTC-260F20.3	4.88e-110
cg02386822	MUC1	5.33e-110
cg07230581	OPCML	9.26e-110
cg11211563	ARHGEF25	1.06e-109
cg06134860	LCAT	1.84e-109
cg02830936	MTMR9LP	8.3e-109
cg24625388	NEBL	1.15e-108
cg22500132	MUC1	1.26e-108
cg00448814	NKAPL	1.32e-108
cg14642395	SLC22A11	2.62e-108
cg04360793	ELTD1	3.38e-108
cg22980079	FAM193A	2.14e-107
cg26422458	ELTD1	2.25e-107
cg24136205	ZIC5	2.7e-107
cg27160968	AP001453.1	4.4e-107
cg19107511	RP11-1100L3.7	7.3e-107
cg07039560	SLC25A2	8.35e-107
cg08288811	PCDHA3	9.96e-107
cg04150495	MIR663A	1.79e-106
cg18247055	SPAG6	2.46e-106
cg24704593	MACC1;AC005083.1	3.09e-106
cg24437737	HIST2H2BB;RP5-998N21.10;RP5-998N21.7;HIST2H3PS2	3.29e-106
cg25641533	SAPCD1-AS1	7.01e-106
cg26612727	ZPBP2	8.22e-106
cg25264948	SAPCD1-AS1	9.5e-106
cg08274637	DLEU7	1.11e-105
cg03419151	XAF1	2.72e-105
cg16705627	SOX1	4.68e-105
cg07149609	PRRX1	5.59e-105
cg22399133	CRYGD	6.46e-105
cg01190168	MIR26A2	1.56e-104
cg12134633	SCG5	2.81e-104
cg05081953	ERMN	3.47e-104
cg13405226	AP003356.1	6.76e-104
cg22908616	DNHD1	8.87e-104
cg10158997	SAPCD1-AS1	9.8e-104
cg14549256	FAM193A	1.22e-103
cg20817661	F13A1	2.42e-103
cg05053440	RNA5SP77	3.04e-103
cg09354317	RP5-966M1.6;MUSTN1	3.21e-103
cg10477621	FERD3L	3.28e-103
cg15839431	YJEFN3	4.98e-103
cg06594404	RP11-2H3.7	5.55e-103
cg16322014	DNHD1	6.29e-103
cg10374084	IZUMO2	1.12e-102
cg18417954	CTD-2587H24.4	1.72e-102
cg16118387	SERTAD4-AS1	1.79e-102
cg18500300	NACAD	2.22e-102
cg16143804	MSH5;MSH5-SAPCD1	2.63e-102
cg07557423	RP11-109E24.2	4.66e-102
cg12941836	RP5-966M1.6;MUSTN1	8.57e-102
cg13187827	SAPCD1-AS1	5.22e-101
cg24866792	BPIFA4P	1.24e-100
cg18114463	TMEM240	3.79e-100
cg11625005	TERT	4.01e-100
cg14410016	HOXD9	4.47e-100
cg00529958	ZIC5	6.99e-100
cg15157455	HIST2H2BB;RP5-998N21.10;RP5-998N21.7;HIST2H3PS2	7.05e-100
cg06430632	HNRNPA1P49	7.54e-100
cg20095656	PFN3	7.57e-100
cg08833577	VAX1	1.09e-99
cg04282788	SERTAD4-AS1	1.45e-99
cg05245070	RP11-452I5.2	3.86e-99
cg09061733	SERPING1	4.41e-99
cg07496545	SLC25A2	4.79e-99
cg23016129	SPAG6	7.47e-99
cg18554976	FXYD1;CTD-2527I21.4	9.37e-99
cg01518607	XXbac-BPGBPG24O18.1	1.39e-98
cg01287088	PFN3	1.6e-98
cg15466862	SOX1	3.15e-98
cg15618978	RP11-432B6.3	4.52e-98
cg06429887	FITM1	6e-98
cg06783429	LRRC4	8.01e-98
cg22417733	RP1-101K10.6	9.95e-98
cg22995449	BATF	1.04e-97
cg02131853	TMEM156	1.2e-97
cg25369015	SLC25A33	1.98e-97
cg04330806	DBF4	2.15e-97
cg18581950	GPBAR1	2.63e-97
cg17941572	LINC00466	3.07e-97
cg06585203	EZR-AS1	3.45e-97
cg05691833	RP11-342M3.5	3.52e-97
cg12377139	SPAG6	6.4e-97
cg26376245	RP11-452I5.2	6.97e-97
cg22584911	Y_RNA	7.25e-97
cg05239811	SAPCD1-AS1	8.69e-97
cg18694169	NKAPL	8.7e-97
cg10637995	BPIFA4P	1.09e-96
cg16142855	RP11-2H3.7	1.18e-96
cg07105285	MTNR1B	3.84e-96
cg13654884	EXOC6	4.04e-96
cg15427886	RP11-53M11.5	4.99e-96
cg02365945	RP11-286H14.4	1.2e-95
cg17408527	ZSCAN18	1.92e-95
cg12877723	RP11-17A4.2	1.92e-95
cg01794853	HSPG2	3.22e-95
cg04212239	IFT80	6.03e-95
cg18503912	CTD-2527I21.5	7.33e-95
cg11256214	FAM222A-AS1	9.55e-95
cg08753951	MIR1286	9.77e-95
cg10667970	FBXO6	1.72e-94
cg15759721	MIR21	3.31e-94
cg26595643	VAX1	4.58e-94
cg08890627	CYCSP40	2.18e-93
cg23526676	SAPCD1-AS1	4.55e-93
cg23910340	RP11-620J15.4	4.85e-93
cg25950278	RP11-386G11.3	5.23e-93
cg13906823	RP11-544M22.13;TSTD1	6.22e-93
cg19399165	EMILIN1	7.67e-93
cg02694427	HOXD12	9.32e-93
cg16361890	LTC4S	1.18e-92
cg21751145	C2orf88	1.47e-92
cg05637536	SHE;TDRD10	2.36e-92
cg21091985	MSH5;MSH5-SAPCD1	3.4e-92
cg21897315	GBE1	3.49e-92
cg12277416	AC006130.3	3.53e-92
cg27409154	IGFBP6	3.88e-92
cg08171483	MIR26A1	4.57e-92
cg04535391	AC022384.2	6.7e-92
cg01722932	MTNR1B	7.56e-92
cg24394172	GABRB1	7.67e-92
cg17388996	SCML4	1.28e-91
cg14085715	MACC1;AC005083.1	2.79e-91
cg15645309	BATF	3.47e-91
cg16963852	SIAH2-AS1	5.01e-91
cg14679230	LIPE	1.16e-90
cg07132223	ARHGEF25	1.44e-90
cg15700197	OR10J1	1.5e-90
cg15996534	ZNF300P1	2.22e-90
cg10030458	RP4-548D19.3	2.36e-90
cg25691553	MIR425;NDUFAF3;MIR191	2.73e-90
cg06585307	LA16c-380F5.1	2.73e-90
cg22610645	ARHGEF25	4.09e-90
cg23741006	TCN1	4.69e-90
cg02650767	OR2B11	4.8e-90
cg15480305	MIR4800	5.09e-90
cg18268547	NPLOC4	6.07e-90
cg21040575	MIR195;MIR497	6.23e-90
cg02457680	SHE;TDRD10	9.11e-90
cg16290101	LINC00303	9.18e-90
cg10982443	KLHL33	1.12e-89
cg24411961	AC115286.1	1.89e-89
cg26354493	FSD1	1.91e-89
cg15617545	SERPING1	2.16e-89
cg06437799	YY1AP1	2.39e-89
cg25212131	SLC25A2	2.39e-89
cg01031101	NKAPL	2.55e-89
cg00128100	PPP1R18	2.61e-89
cg02531437	PRLHR	3.37e-89
cg26904702	AL513523.2;SLC27A3	4.52e-89
cg02700891	TRH	5.2e-89
cg19896639	SLC25A33	5.23e-89
cg02564259	LCAT	5.45e-89
cg01398941	C1orf177	7.82e-89
cg26456435	RP11-196G11.2	9.11e-89
cg02990439	RP5-1050D4.2	1.07e-88
cg15286094	MIR6132	2.03e-88
cg12610471	SPAG6	2.32e-88
cg02909446	SPOCK2	2.64e-88
cg06559575	IGFBP6	3.76e-88
cg11591485	RNU6-230P	4.28e-88
cg03239580	C4A-AS1;CYP21A1P	4.55e-88
cg16108230	VGLL2	4.86e-88
cg03696599	AC079154.1;CNTNAP5	5.05e-88
cg13846270	DLEU7	5.93e-88
cg09837977	LRRN3	6.57e-88
cg11199639	ADAM5	7.63e-88
cg03526459	RNVU1-8	8.02e-88
cg04477962	METTL7A	8.82e-88
cg26279070	RHOQP3	1.02e-87
cg18502630	PTGDS	1.08e-87
cg00719668	CNBD2	1.08e-87
cg11436222	HIST1H3E	1.24e-87
cg08267399	LINC01300	1.27e-87
cg26647291	AP001453.1	1.57e-87
cg08889009	RP11-30K9.5;ZNF444P1;RNF111	1.67e-87
cg06966811	OTX2	1.93e-87
cg10082647	RP11-412D9.4;TMEM263	2.04e-87
cg15409097	ARHGEF25	2.31e-87
cg03597347	ZSCAN12P1	2.66e-87
cg19659741	ADAM5	3.88e-87
cg00379720	ZNF728	4.15e-87
cg08581953	RP11-458I4.2	4.76e-87
cg21890551	FLJ22447	5.01e-87
cg07501988	CTB-186G2.1	5.72e-87
cg16634404	COL11A2	5.91e-87
cg06634862	LNX1-AS2	6.16e-87
cg16222581	RP11-449P15.2	7.9e-87
cg00050496	FAM222A-AS1	7.9e-87
cg07159686	MIR1286	8.56e-87
cg05919685	APCS	9.33e-87
cg27549720	HTR6	1e-86
cg13358636	AC079154.1;CNTNAP5	1.19e-86
cg02164046	SST	1.22e-86
cg24235613	VARS	1.86e-86
cg18839637	PCDHGA3	2.03e-86
cg27610605	RP11-208G20.3;RP11-208G20.2;SEPT7P6	2.07e-86
cg24411043	RP11-544M22.13;TSTD1	2.62e-86
cg06527213	MIR1276	2.76e-86
cg04396850	LINC00944	2.9e-86
cg10791422	MRGPRD	3.53e-86
cg01876130	KANSL3;FER1L5	3.56e-86
cg13644317	NETO1	3.58e-86
cg18267049	TPM4P1	3.91e-86
cg24471254	ACTL6B	4.08e-86
cg07445246	TCL1A	4.27e-86
cg09523275	NKAPL	5.58e-86
cg17078116	GS1-72M22.1	6.69e-86
cg27128761	CTB-113P19.1	9.39e-86
cg18816826	MT1HL1	9.85e-86
cg24654177	ALDH1A2;RP11-355N15.1	1.34e-85
cg20614157	TNXA;STK19B;C4B	1.35e-85
cg15701111	KRT81	2.63e-85
cg13327545	RP11-573G6.8	2.85e-85
cg19154116	C4B-AS1;CYP21A2	4.79e-85
cg20270863	SERTAD4-AS1	6.1e-85
cg03858673	ZBED9	6.93e-85
cg01447427	USP21	9.11e-85
cg16491668	RP4-601P9.2	1.02e-84
cg27494647	RARRES2;RP4-584D14.7	1.67e-84
cg24911113	ZNF728	2.02e-84
cg07617764	MIR26A2	2.03e-84
cg00332937	FOXD1-AS1	2.19e-84
cg01808879	TMPO-AS1	3.25e-84
cg12150256	HYAL2	3.66e-84
cg14175438	FAM3C;CYCSP19	4.24e-84
cg00962755	PHLDA3	4.24e-84
cg19376858	TNXA;STK19B;C4B	4.59e-84
cg15252509	MALT1	5.06e-84
cg10768316	HNRNPA1P49	6.55e-84
cg04111071	TMEM196	6.84e-84
cg08857994	ARHGAP42P2	7.11e-84
cg09495207	LCAT	7.11e-84
cg19798735	LRRN3	7.63e-84
cg13539545	SIX6	8.77e-84
cg04268405	CHST3	1.13e-83
cg02707176	PCDHGA11	1.17e-83
cg00181439	HTR1B	1.35e-83
cg01009664	TRH	1.56e-83
cg14424070	BATF	1.67e-83
cg21298174	ZNF709	3.78e-83
cg17930201	SYT11	4.36e-83
cg24408313	BCL2	4.43e-83
cg15791248	FGFR1	5.52e-83
cg12561125	ARHGEF25	6.41e-83
cg01954585	RP11-158M2.2	6.61e-83
cg17485838	HOTAIRM1_2;HOTAIRM1_3;HOTAIRM1_4;HOTAIRM1_5	8.86e-83
cg06203976	CADM3	9.17e-83
cg15945235	ANKRD22	9.22e-83
cg09578475	ZNF177	1.13e-82
cg03100639	RP11-452L6.6;TGFB1I1	1.16e-82
cg16400350	LINC00163	1.16e-82
cg11394785	LTC4S	1.45e-82
cg07052041	ADAM8	1.68e-82
cg03846249	RP11-143E21.3	1.72e-82
cg01287000	AF186192.6	1.81e-82
cg00711496	ADM5	2.08e-82
cg19542849	AC093373.1	2.18e-82
cg21531300	BATF	2.42e-82
cg20624923	PRLHR	2.63e-82
cg20171999	RRS1-AS1	2.69e-82
cg06024289	RP11-153F5.7;KRT18	3.34e-82
cg11235787	MIR195;MIR497	3.69e-82
cg05774978	PDIA3P1	3.75e-82
cg00143527	RP11-775C24.5;MESDC1	3.93e-82
cg06545367	LRRN3	4.65e-82
cg01298514	VEGFA	4.78e-82
cg08523865	AC079154.1;CNTNAP5	5.88e-82
cg14042121	RP11-318A15.8	6.86e-82
cg14425564	RP11-85O21.5	6.96e-82
cg23003085	PRDX5	7.71e-82
cg13159388	RHPN1-AS1	1.1e-81
cg16430687	RP11-42O4.2	1.14e-81
cg12491114	KRT19	1.27e-81
cg01202519	SLC25A1P1	1.48e-81
cg20335425	S100A8	1.59e-81
cg08338216	PHACTR2P1	1.65e-81
cg10019467	RBM47	1.72e-81
cg25707767	RSPH10B2	1.77e-81
cg00764217	MIR6132	1.91e-81
cg08576304	ATP6V1B1	2.03e-81
cg16986578	RP11-465N4.4;RP11-510N19.5	2.08e-81
cg03964958	HOXD12	2.2e-81
cg11517269	ZSCAN12P1	2.35e-81
cg19588399	SYTL1	4.01e-81
cg21374324	RP11-274B21.12;RP11-274B21.3	6.27e-81
cg06298729	MIR3161	6.3e-81
cg05308792	TMEM204;LA16c-380F5.1	6.81e-81
cg04244985	KIR3DX1	7.39e-81
cg18105139	ZSCAN12P1	7.52e-81
cg11523799	LRRC73	7.82e-81
cg13840445	KLHL31	9.17e-81
cg01519063	KB-1562D12.1	9.91e-81
cg07448060	MAGI2	1.08e-80
cg26452868	PCDH15	1.16e-80
cg17239057	RP11-365O16.1;DEGS1	1.2e-80
cg19865770	C1orf140	1.26e-80
cg04425920	DRGX	1.4e-80
cg25902889	FSD1	1.45e-80
cg19878884	AP001453.1	1.48e-80
cg21798544	AP2A2	1.53e-80
cg02596427	AC073283.7	1.72e-80
cg08367659	MIR6832	2.7e-80
cg05809668	AC009531.2	2.89e-80
cg24899006	DPAGT1	2.98e-80
cg22782873	YJEFN3	3.12e-80
cg13951797	TRAF7	3.34e-80
cg08928145	NDUFA13;CTC-260F20.3	3.88e-80
cg00876196	KIR2DL4	4.07e-80
cg27076223	RBM47	4.23e-80
cg01382864	PTPRN	4.26e-80
cg20944283	ACKR1	4.81e-80
cg05803237	MTNR1B	5.27e-80
cg15154229	CPA1	5.57e-80
cg08616061	PCDHGA6	5.66e-80
cg19635505	KLHL33	5.98e-80
cg14001664	ARHGAP42P1	6.06e-80
cg17849569	ZSCAN12P1	6.18e-80
cg04598121	RP11-17A4.2	6.24e-80
cg00123055	SOX17	6.34e-80
cg21500354	DNHD1	7.25e-80
cg10228500	EPHA1	7.27e-80
cg25137968	RP11-439A17.10;HIST2H2BA;RP11-439A17.4	8.75e-80
cg04645914	ZNF350-AS1	9.89e-80
cg05016408	ZNF300P1	1.11e-79
cg15749858	MACC1;AC005083.1	1.15e-79
cg14742937	ADAM5	1.18e-79
cg08783253	AOC2	1.27e-79
cg08364561	PAUPAR	1.3e-79
cg27091787	HYAL2	1.47e-79
cg01851378	SALL1	1.53e-79
cg05413258	RBM44	1.65e-79
cg01461199	RP11-713M15.2	1.69e-79
cg11172423	CLDN19	1.72e-79
cg08602528	RP11-295D4.1	1.82e-79
cg23290344	RP11-624C23.1	1.85e-79
cg15122993	AC005609.18	2.19e-79
cg11052143	ALS2CR11	2.89e-79
cg07387286	ADAM5	2.96e-79
cg18022921	VEGFA	3.21e-79
cg06896909	TMEM196	3.49e-79
cg18568589	ZNF560;CTC-543D15.3	3.54e-79
cg23334662	RFTN2	3.65e-79
cg13933080	SPAG6	3.78e-79
cg08823182	S100A5	3.91e-79
cg27051129	DLEU7	4.2e-79
cg26980034	KLHL31	4.48e-79
cg03138446	AL513523.2;SLC27A3	4.48e-79
cg15811515	CTD-2014E2.5;CSDAP1	5.03e-79
cg14621323	PFN3	5.13e-79
cg08949974	RBM47	5.18e-79
cg27320005	SLC25A2	5.44e-79
cg15626828	PEBP1P3	6.04e-79
cg08668316	RP11-2H3.7	6.16e-79
cg17493885	NSD1	7.3e-79
cg02736395	RNA5SP77	8.53e-79
cg16705395	AC005042.5	9.84e-79
cg17081914	NCKAP5	9.94e-79
cg10056132	C10orf53	1.02e-78
cg23536681	RP11-2H3.7	1.03e-78
cg19426522	EOMES	1.1e-78
cg24298684	MC3R	1.29e-78
cg09192801	ZDHHC17	1.4e-78
cg02297967	LINC00968	1.48e-78
cg11274778	BPIFA4P	1.71e-78
cg24154839	GABRB1	1.73e-78
cg06771126	HOPX	1.75e-78
cg22921760	SALL2	1.79e-78
cg02025583	TMEM220-AS1	1.81e-78
cg18556676	ABCC9	1.86e-78
cg02520020	SERPING1	2.17e-78
cg05616010	ZSCAN18	2.34e-78
cg03520644	COL11A1	2.38e-78
cg19708901	KIAA1614	2.49e-78
cg02311725	HCK	3.03e-78
cg19051861	RP11-494O16.4	3.23e-78
cg21872908	C1orf177	3.53e-78
cg17540545	CTD-2527I21.5	3.77e-78
cg12472603	RP11-318A15.8	4.33e-78
cg10253847	NKAPL	4.62e-78
cg16847637	CPA1	5.03e-78
cg17885226	LINC00577	5.34e-78
cg26980244	GS1-72M22.1	6.25e-78
cg12651761	LLGL1	6.78e-78
cg06905511	CTB-35F21.1	8.49e-78
cg23049458	L1TD1	8.6e-78
cg13916459	ALX1	1.22e-77
cg02631126	ZSCAN12P1	1.28e-77
cg15808426	SMIM17	1.31e-77
cg12953249	CRB2	1.34e-77
cg15918732	SERPING1	1.45e-77
cg22791045	OPCML	1.46e-77
cg17217691	DDR2	1.82e-77
cg21113740	ELTD1	1.9e-77
cg00172849	COL11A1	2.51e-77
cg16166968	ADAM30	2.87e-77
cg00160388	MIR365A	3.37e-77
cg03496533	PRR15L	3.62e-77
cg15887459	RP11-113D6.10	3.7e-77
cg19759135	LTC4S	4.54e-77
cg10537450	RP11-495P10.4	4.57e-77
cg23200020	SCGB1B2P	4.78e-77
cg10359157	DLEU7	5.15e-77
cg19264571	APCDD1	5.54e-77
cg15975802	U47924.31;PTPN6	5.63e-77
cg01488159	FHDC1	6.39e-77
cg01237333	LINC01388	7.48e-77
cg25691167	FERD3L	7.71e-77
cg05948372	MIB1	8.72e-77
cg07441518	PAUPAR	8.73e-77
cg16309127	PFDN5	1.05e-76
cg09242181	LRP4	1.1e-76
cg20982046	RP11-434I12.4	1.4e-76
cg05598919	NACAD	1.58e-76
cg04778012	GPC2;STAG3	1.79e-76
cg21820656	RP11-30K9.5;ZNF444P1;RNF111	1.91e-76
cg21161526	TRAF1	2e-76
cg10502231	RP11-365O16.1;DEGS1	2.05e-76
cg16810293	TM4SF1;TM4SF1-AS1	2.1e-76
cg00091633	FSTL1	2.15e-76
cg04363624	TAL1	2.43e-76
cg25595834	RP11-30K9.5;ZNF444P1;RNF111	2.66e-76
cg12618806	DLGAP2	2.71e-76
cg20779964	CBLN4	3.12e-76
cg19592637	VSX1	3.29e-76
cg07852825	GHSR	3.42e-76
cg11764900	RP3-503A6.2;DNAH8	3.71e-76
cg18081940	SHE;TDRD10	4.01e-76
cg13433881	ASTL	4.59e-76
cg02291164	RP11-112J1.3	4.64e-76
cg08204783	ZNF709	4.74e-76
cg00520933	ZEB1	5.1e-76
cg07240873	PCDHA10	5.86e-76
cg12426196	RP11-544M22.13;TSTD1	6.72e-76
cg15787039	SCG5	6.89e-76
cg09176539	RP11-707M1.1	7.13e-76
cg05638493	SLC25A2	8.66e-76
cg17508991	HCK	9.73e-76
cg06847624	PFN3	9.76e-76
cg07967677	RP11-544M22.13;TSTD1	1.06e-75
cg21338225	AC007036.4	1.07e-75
cg12486913	CFAP45;MIR4259	1.14e-75
cg02875879	MIR367;MIR302D;MIR302A;MIR302C;MIR302B	1.34e-75
cg11671363	RP11-394O4.5;MIR145	1.34e-75
cg27628839	ASH1L	1.43e-75
cg25161912	RPSAP52	1.45e-75
cg24938752	LINC01565	1.47e-75
cg03111498	VSX1	1.5e-75
cg10874556	GHc-210E9.2	1.93e-75
cg13967888	RP11-307E17.8	2.04e-75
cg21636683	SLC25A2	2.31e-75
cg05509753	TGFB1I1	2.54e-75
cg06495961	DPP6	2.72e-75
cg23989004	ZNF709	2.82e-75
cg23092040	RP11-973N13.2	2.97e-75
cg11015251	HOXA4	3.34e-75
cg15874302	KAT6B	3.56e-75
cg04374393	SOX14	4.09e-75
cg27454064	TMEM5-AS1;PABPC1P4	4.24e-75
cg10883352	PBX2P1	4.53e-75
cg00548268	NPTX2	5.08e-75
cg00283535	ANXA13	5.22e-75
cg26553501	C1orf86	5.23e-75
cg27353361	SCML4	5.46e-75
cg18969232	RP11-89K21.2	6.26e-75
cg13309012	MIR155	6.35e-75
cg20218614	RP11-539E17.5	6.57e-75
cg12537162	ITGB3;RP11-290H9.2	7.11e-75
cg10168149	SATB2	7.91e-75
cg24119869	KIR3DX1	7.95e-75
cg21700511	HSPA12B	8.53e-75
cg19403534	PRLHR	8.82e-75
cg18397308	AC005253.2	9.09e-75
cg03309176	ARHGEF25	1.07e-74
cg00910715	RHOQP2	1.11e-74
cg14824732	FHDC1	1.12e-74
cg10975001	RP11-131M11.3	1.24e-74
cg10460946	RP11-219G17.8	1.37e-74
cg20441502	LGI4;FXYD7	1.56e-74
cg07375207	RHOT2	1.9e-74
cg10301695	VWF	1.91e-74
cg00191458	LINC01366	1.95e-74
cg00144335	Z95704.3	2.17e-74
cg15842276	MTNR1B	2.21e-74
cg06839111	LCAT	2.3e-74
cg05799811	CD247;AKR1D1P1	2.55e-74
cg01656853	FUT2	2.66e-74
cg09293614	AC004623.2	2.95e-74
cg20655350	GPBAR1	2.99e-74
cg09032973	PCDHA1	3.06e-74
cg16783744	DPYS	3.7e-74
cg04733537	TMEM132D	3.78e-74
cg25764899	TAL1	3.89e-74
cg17279839	RARRES2;RP4-584D14.7	3.92e-74
cg23610154	LINC00710	3.99e-74
cg04837832	LINC01475;NKX2-3	4.48e-74
cg19802477	LILRA4	4.82e-74
cg03576469	CCDC8	4.99e-74
cg12778178	UCKL1-AS1	6.24e-74
cg05680240	VARS	7.49e-74
cg17991695	GCM2	8.04e-74
cg08571821	SLC12A4	8.39e-74
cg02226239	CYP11B2	9.13e-74
cg03685774	CFAP45;MIR4259	9.21e-74
cg23089825	PRRX1	9.89e-74
cg10661615	PRLHR	1.03e-73
cg08129092	AL513523.2;SLC27A3	1.03e-73
cg18121224	NSD1	1.24e-73
cg05118960	HYAL2	1.38e-73
cg03731268	L1TD1	1.39e-73
cg07670516	USP6	1.43e-73
cg05863502	CACNA1B	1.53e-73
cg00298977	LELP1	1.58e-73
cg07717903	PCDHGA6	1.61e-73
cg10761978	RTP2;RP11-211G3.3	1.65e-73
cg20981848	RP4-742J24.2	1.68e-73
cg13558754	PROSER3	2.19e-73
cg20312687	DEFB118	2.3e-73
cg01558401	MIR143HG	2.5e-73
cg13496662	APOC1	2.53e-73
cg12640942	TPM3;MIR190B	2.53e-73
cg10804656	RP11-573G6.8	2.91e-73
cg19414741	RP11-17A4.2	3.27e-73
cg20052865	SNORD114-1	3.73e-73
cg11618529	ZNF132;CTD-2619J13.19	3.89e-73
cg08944929	LCAT	4.65e-73
cg27071152	AC004837.4;AC004837.3	6.35e-73
cg23851167	EEF1A2	6.87e-73
cg05426601	CPA1	7.36e-73
cg02582940	KANSL3;FER1L5	7.63e-73
cg21708058	TACC1	7.67e-73
cg07600533	KLHDC7B	7.88e-73
cg02852670	KLHL33	8.35e-73
cg21291672	TMEM200B	8.88e-73
cg08139855	CSF1	9.05e-73
cg03962217	PAXIP1	1.01e-72
cg10189661	XXbac-BPG32J3.20;LY6G6E;LY6G6D	1.03e-72
cg03661324	CTNNA2	1.04e-72
cg20874785	DCTN1-AS1	1.04e-72
cg25730098	NLRP4	1.04e-72
cg08971171	MIR25;MIR93;MIR106B	1.1e-72
cg10996148	MIR3183	1.13e-72
cg04415798	RP11-964E11.2	1.13e-72
cg21103250	RBM44	1.42e-72
cg09581611	LCAT	1.53e-72
cg09237454	RP11-208G20.3;RP11-208G20.2;SEPT7P6	1.75e-72
cg00848392	SAPCD1-AS1	1.9e-72
cg26924825	LCAT	1.9e-72
cg14260530	AKNA	2.03e-72
cg18484008	MIR1229	2.23e-72
cg16659728	MRGPRD	2.26e-72
cg12782180	LEP	2.82e-72
cg10187927	TGFBI	2.88e-72
cg14319235	ELTD1	2.91e-72
cg02214783	SMIM1	3.06e-72
cg05516842	MIR1301	3.13e-72
cg17299899	SALL3	3.52e-72
cg02286091	BHMT	3.7e-72
cg02694099	CT62	3.72e-72
cg01316923	LRRC73	3.75e-72
cg09937039	BATF	3.75e-72
cg02081266	TBX4	3.79e-72
cg18315861	OR2T11	3.82e-72
cg06544405	NETO1	3.84e-72
cg21563471	ERMN	3.84e-72
cg01995289	AF186192.6	3.86e-72
cg14413466	RP11-455O6.2	4.59e-72
cg19594666	LEP	4.61e-72
cg10520594	RP11-649A18.3	4.86e-72
cg13590228	SIAH2-AS1	5.56e-72
cg00170236	MIR25;MIR93;MIR106B	6.16e-72
cg25648436	LETM1P2	6.3e-72
cg16659284	RP11-276H1.2	6.6e-72
cg02732252	TNFRSF12A	7.15e-72
cg27563985	CBLN4	7.28e-72
cg09513990	XXbac-BPGBPG24O18.1	7.97e-72
cg04299439	NEUROD1;AC013733.3	8.99e-72
cg07463541	PCDHA3	1.05e-71
cg07012128	DLGAP2	1.07e-71
cg07648740	HTR5A-AS1	1.11e-71
cg17415576	MIR195	1.12e-71
cg22789982	RP11-973N13.2	1.17e-71
cg19112186	CPT1B	1.18e-71
cg24161057	RP11-544M22.13;TSTD1	1.61e-71
cg18693673	ZSCAN18	1.62e-71
cg02156380	KIAA1614	1.82e-71
cg16985778	MTMR9LP	1.9e-71
cg01059331	RP4-798A10.4	2.03e-71
cg02058408	SCDP1	2.09e-71
cg25719851	U47924.31;PTPN6	2.13e-71
cg01405040	HOXD12	2.15e-71
cg22288613	AGGF1P1	2.18e-71
cg18653451	CCDC8	2.22e-71
cg05940452	FOXR1	3.38e-71
cg15127733	HSPA12B	3.54e-71
cg07057579	LINC01197	3.6e-71
cg27305772	CFL1	3.92e-71
cg16823083	TP73	4e-71
cg12740337	ZSCAN12P1	4.48e-71
cg05324273	RP11-179B15.6	4.67e-71
cg04963480	CT62	5.05e-71
cg09684846	TVP23A	5.33e-71
cg13713922	RP11-297J22.1	5.61e-71
cg04961235	PAPOLB	5.79e-71
cg02989940	AHSP	7.07e-71
cg07780543	ABCC9	8.47e-71
cg18899777	KB-1562D12.1	8.73e-71
cg24221648	RP11-52L5.6	9.43e-71
cg16377117	STAT6	9.56e-71
cg06757585	PCDHGA6	9.57e-71
cg13738144	PRDM13	9.92e-71
cg08061755	RP11-540A21.2	1.08e-70
cg06617961	RNA5-8SP2	1.09e-70
cg15186616	DLGAP2	1.14e-70
cg00384653	MIR1286	1.17e-70
cg22032812	RP11-429J17.8	1.22e-70
cg12744820	OLIG3	1.44e-70
cg23725321	SEC31B	1.44e-70
cg22691524	SENP2	1.45e-70
cg25657261	PCDHGA3	1.55e-70
cg13407335	KCNAB3	1.61e-70
cg11429969	PCDHA3	1.72e-70
cg06692785	KIAA1614	1.74e-70
cg07961632	SYTL1	1.95e-70
cg15300436	MYT1L-AS1	2.03e-70
cg22517388	CARTPT	2.19e-70
cg00018229	ARV1	2.29e-70
cg11613559	PHACTR2P1	2.55e-70
cg08636573	CLDN15	2.57e-70
cg06403845	RP11-117L5.4	3.06e-70
cg05422029	XXbac-BPGBPG24O18.1	3.07e-70
cg00666640	OR2T12	3.21e-70
cg01006802	PRSS30P	3.31e-70
cg02572956	MIR671	3.34e-70
cg17384889	NKAPL	3.34e-70
cg05600044	HHIPL2	3.4e-70
cg23513183	AC006130.3	4.09e-70
cg17191109	CTBP2	4.25e-70
cg01699298	CBLN4	5.14e-70
cg17390562	EZR-AS1	5.61e-70
cg11940285	TRH	5.67e-70
cg02638567	AC079398.2	5.94e-70
cg19250989	RP11-495P10.6	6.17e-70
cg19805160	CFAP45;MIR4259	6.26e-70
cg20539474	BPIFA4P	6.34e-70
cg11234281	ZNF32-AS3	6.35e-70
cg14573817	TMEM263	6.66e-70
cg21653641	MAMSTR	6.94e-70
cg09805403	GSPT1;AC007216.1	7.03e-70
cg11388664	CADM3	7.24e-70
cg26492368	SPAG6	7.36e-70
cg20585869	GS1-72M22.1	8.44e-70
cg20435896	RBM47	1.01e-69
cg16651126	HOXA4	1.16e-69
cg05247914	FXYD1;CTD-2527I21.4	1.23e-69
cg23236370	ADAMTS12	1.27e-69
cg00468228	CRH	1.29e-69
cg15692229	EGFR-AS1	1.35e-69
cg03486485	CALCB	1.43e-69
cg18147296	FAM41C	1.45e-69
cg25192855	IRF6	1.47e-69
cg26199241	TBX4	1.61e-69
cg18770579	ADM5	1.61e-69
cg19449286	TMEM88	1.77e-69
cg00116092	ESRRG	1.8e-69
cg20672981	HOTTIP_3	1.89e-69
cg20732478	HOXD8	1.92e-69
cg26428069	NCKAP5	2.29e-69
cg06712013	SPATS2	2.31e-69
cg21253043	SLC4A8	2.53e-69
cg13047869	FANCD2OS	2.66e-69
cg16755922	RP13-638C3.6;RP13-638C3.2	2.7e-69
cg00401972	CDH5	2.79e-69
cg06485521	KLHL31	2.8e-69
cg09471659	ABCB10P4	3.1e-69
cg20342184	GRHL2	3.37e-69
cg01156295	LRRTM2	3.38e-69
cg22774211	ADAM30	3.86e-69
cg15198729	GHc-210E9.2	4.11e-69
cg13158272	ELMSAN1	4.16e-69
cg10030791	SERPING1	4.25e-69
cg21039708	OTX2;OTX2-AS1	4.27e-69
cg05167251	HOXD9	4.29e-69
cg00920139	C8orf58	4.65e-69
cg13466383	RP11-544M22.13;TSTD1	5.2e-69
cg20181079	OR4D11	5.51e-69
cg02912371	SLC26A9	5.88e-69
cg17355042	MIR324	5.91e-69
cg19894382	RP11-179B15.6	6.07e-69
cg09465698	PCDHGB6	6.08e-69
cg06195280	XAF1	6.25e-69
cg18547284	PIP	6.6e-69
cg21414251	OR12D2;OR12D2	6.66e-69
cg17978367	CTC-507E2.2	6.79e-69
cg26728422	AL031721.1	7.18e-69
cg24114014	ZBED9	7.41e-69
cg11234328	UTF1	8.11e-69
cg25991631	CTD-2281E23.1	8.29e-69
cg18273421	SAPCD1-AS1	8.85e-69
cg24363820	CPT1B	8.91e-69
cg16348470	AC115286.1	9.38e-69
cg03422911	RYR2	9.46e-69
cg11345693	RP11-455O6.2	9.47e-69
cg22121557	ZBED9	9.76e-69
cg25429719	CRYGD	9.91e-69
cg10851350	MIR6832	1.01e-68
cg26517663	FOXB1	1.02e-68
cg00421624	AL513523.2;SLC27A3	1.02e-68
cg22232207	CD40	1.11e-68
cg01408508	MIR663A	1.13e-68
cg27107970	C17orf70	1.12e-68
cg06825512	APCDD1	1.16e-68
cg12744634	CEP85	1.17e-68
cg00106345	HOTAIRM1_2;HOTAIRM1_3;HOTAIRM1_4;HOTAIRM1_5	1.18e-68
cg22896793	HSPA12B	1.26e-68
cg04292941	DNHD1	1.33e-68
cg22340508	CTC-451A6.5	1.34e-68
cg04764012	CTD-2014E2.5;CSDAP1	1.4e-68
cg19632842	LINC00176	1.41e-68
cg03513312	MIR647	1.42e-68
cg15103195	AP1S1	1.43e-68
cg14876315	CTB-35F21.1	1.44e-68
cg03465652	RP11-297J22.1	1.54e-68
cg05221167	ZNF560;CTC-543D15.3	1.59e-68
cg16327839	SPATA19	1.61e-68
cg20070090	S100A8	2.03e-68
cg17761772	SIGLEC9	2.1e-68
cg22562942	GS1-72M22.1	2.32e-68
cg24428232	MIR921	2.78e-68
cg02721693	SHCBP1L	3.06e-68
cg26132774	RP11-52L5.6	3.29e-68
cg12593431	RP11-65D24.2	3.42e-68
cg07414392	TJP2	3.5e-68
cg17919186	RP11-895M11.3	3.65e-68
cg10204320	MTMR9LP	3.67e-68
cg26140293	RP11-794G24.1	3.93e-68
cg27582986	CSNK1G2-AS1	4.09e-68
cg11282657	NPLOC4	4.36e-68
cg22852840	OPN5	4.46e-68
cg18322569	BARHL2	4.64e-68
cg11489090	PRSS51	4.65e-68
cg26155802	OR4F6;OR4F15	4.68e-68
cg00425918	RP11-175E9.1	5.22e-68
cg18024113	RP5-875O13.1;U1	5.61e-68
cg01287975	TAC1	5.8e-68
cg22941668	RP11-394O4.5;MIR145	6.27e-68
cg21918786	PTCHD3P3	6.35e-68
cg15058253	RP11-545G3.2	7.03e-68
cg24935332	PAUPAR	7.67e-68
cg04363282	NGEF	7.76e-68
cg07598952	NMBR;RP11-137J7.2	7.77e-68
cg21547371	RP5-966M1.6;MUSTN1	7.88e-68
cg25774643	CDHR5;SCT	8.34e-68
cg23774016	OR10J3	8.55e-68
cg25200152	RP11-495P10.4	8.59e-68
cg08478116	SCG5	1.03e-67
cg22249529	KLHDC7B	1.07e-67
cg08370178	CTD-2035E11.4	1.1e-67
cg02977575	AL355388.1	1.2e-67
cg23063647	ZNF876P	1.21e-67
cg00718513	IGKV7-3	1.26e-67
cg09470142	C2orf88	1.27e-67
cg15166590	FAM180B	1.34e-67
cg11202871	RP11-134L10.1	1.35e-67
cg11346237	CPA1	1.35e-67
cg22620221	DPP6	1.38e-67
cg10119075	ITIH5	1.5e-67
cg06530441	CPT1B	1.58e-67
cg17883035	MIR8085	1.61e-67
cg05617469	ZIC5	1.66e-67
cg05686445	SND1-IT1	1.81e-67
cg19792599	PUS3	1.82e-67
cg12058064	MIR1276	1.93e-67
cg24729378	FAM183A	2.02e-67
cg00366531	RHOQP3	2.08e-67
cg12616484	MIR671	2.16e-67
cg26130488	TBX4	2.18e-67
cg03502002	GALR1	2.19e-67
cg00446235	RP11-544M22.13;TSTD1	2.19e-67
cg07994661	FHDC1	2.22e-67
cg08014964	MYH4	2.23e-67
cg13391381	LINC00961	2.24e-67
cg10578938	CTC-248O19.1	2.4e-67
cg15232971	CCDC6	2.68e-67
cg11609668	AP000892.6	2.71e-67
cg20730333	PNLIPRP1	3.56e-67
cg09151754	USP6	3.62e-67
cg05458052	GRHL2	3.63e-67
cg20829347	SOX1	4e-67
cg03166753	RP3-503A6.2;DNAH8	4.09e-67
cg14739664	SLC25A2	4.66e-67
cg09354556	NRADDP	4.8e-67
cg18192417	NEBL	4.82e-67
cg00983904	IFFO1	5.12e-67
cg26353877	APCS	5.12e-67
cg24240626	REG3A	5.58e-67
cg08676173	RP11-77H9.2	5.75e-67
cg03446636	LINC00466	5.79e-67
cg11152302	NYNRIN	5.8e-67
cg11796455	GCM2	5.97e-67
cg06360427	GALR1	5.98e-67
cg14635654	XXbac-BPG300A18.13	6.39e-67
cg20946037	U4	6.52e-67
cg08200869	AC005618.9	6.65e-67
cg01923514	BPIFA4P	6.77e-67
cg25259754	FCRL3	8.55e-67
cg19223411	MIR26B	8.61e-67
cg00257712	MIR4800	8.85e-67
cg13507224	OR10J3	9.14e-67
cg22697962	RN7SL160P	9.47e-67
cg01220257	MIR8085	9.5e-67
cg14817783	CCDC173	1.07e-66
cg02919712	DEPTOR	1.12e-66
cg00840332	LEP	1.14e-66
cg02661372	IER5	1.17e-66
cg03630821	CTD-2619J13.5	1.19e-66
cg08687507	CTD-2281E23.1	1.38e-66
cg05538701	TRAPPC3L	1.48e-66
cg19067730	CTSA	1.54e-66
cg02291365	IRX1P1	1.56e-66
cg06400301	OR2T33	1.61e-66
cg11512608	PLEKHB1	1.7e-66
cg17347178	DND1	1.74e-66
cg20743134	CTD-2013N24.2	1.82e-66
cg09880665	RP5-916O11.3	2.01e-66
cg07274618	SRP68;GALR2	2.18e-66
cg01719433	UCKL1-AS1	2.19e-66
cg11162104	RNA5SP75	2.27e-66
cg08537847	RP11-394O4.5;MIR145	2.31e-66
cg16881676	RP11-977B10.2	2.33e-66
cg18134262	AC005609.17	2.34e-66
cg21275283	MYO15A	2.37e-66
cg18557131	ZIC5	2.64e-66
cg03462322	RHBDF1;MPG	2.72e-66
cg08220966	SNCG	2.99e-66
cg03679755	TPM4P1	3.06e-66
cg08084339	AP002856.5	3.09e-66
cg13858394	RP11-1100L3.7	3.22e-66
cg04281261	LINC00658;RP5-828H9.1	3.31e-66
cg19199590	LRRN4CL	3.4e-66
cg07135797	ZNRD1-AS1	3.45e-66
cg00410926	FAM166B	3.51e-66
cg00649827	CATSPER2P1;PDIA3	3.68e-66
cg25763393	ZNF578	3.87e-66
cg07788092	ZNF177	4.16e-66
cg22292345	NRADDP	4.57e-66
cg08840665	TMEM88	4.66e-66
cg13408605	SIRPG	4.73e-66
cg06641366	LRRC8C;RP11-302M6.4	5.13e-66
cg10001546	RP11-958N24.2	5.25e-66
cg10222027	CTD-2014E2.5;CSDAP1	5.31e-66
cg18031134	HCG4P8	5.81e-66
cg20288341	XXbac-BPG32J3.20;LY6G6E;LY6G6D	6.84e-66
cg20400592	DLEU7	6.85e-66
cg11717597	AL355388.1	7.28e-66
cg09624466	OTX2;OTX2-AS1	7.76e-66
cg02476628	RP11-192H23.4;SGK494	7.85e-66
cg09656389	PAX6	7.99e-66
cg15003208	POC1A	8.04e-66
cg13920529	AQP7;RP11-311H10.4	8.56e-66
cg13682333	RNU7-124P	8.59e-66
cg16185834	VSX1	8.89e-66
cg09156207	ZSCAN12P1	8.91e-66
cg02885007	HOXD9	8.94e-66
cg08389151	CTD-2619J13.5	9.35e-66
cg19622623	RASSF9	9.58e-66
cg09852221	SLC26A9	1.01e-65
cg15203777	CADM3	1.02e-65
cg10899768	KB-1562D12.1	1.03e-65
cg04399632	TXNDC11	1.1e-65
cg27067158	RP1-4G17.2	1.18e-65
cg04744409	LINC00577	1.2e-65
cg24174145	KRT80	1.28e-65
cg16353361	APLN	1.29e-65
cg00426822	MACF1	1.31e-65
cg13986127	RP11-104H15.7;SPEM1	1.39e-65
cg17288288	DLEU7	1.62e-65
cg08875705	IFFO1	1.62e-65
cg06556702	ARHGEF25	1.72e-65
cg16963144	FOXA2	1.83e-65
cg08938584	PCDHGB7	1.88e-65
cg01447828	PRX	1.97e-65
cg24361586	MINOS1P2	2.12e-65
cg04252592	RP11-295D4.1	2.38e-65
cg19243533	CLDN19	2.57e-65
cg11957331	MEGF8	2.6e-65
cg15895197	EMILIN1	2.91e-65
cg24624901	AC003986.5	3.01e-65
cg19870567	SNORA74B	3.06e-65
cg25623524	CTD-2619J13.5	3.21e-65
cg27092191	ZNF267	3.29e-65
cg01852007	MSLN	3.51e-65
cg26379707	RP11-521B24.4	3.74e-65
cg04391048	RNU6-1215P	3.86e-65
cg08886154	PAX4	3.96e-65
cg15893493	RP11-539E17.5	4.71e-65
cg11800608	C20orf85	4.91e-65
cg21450888	DNM3OS;MIR199A2	4.96e-65
cg04905421	LA16c-380F5.1	5.11e-65
cg12267021	AP002490.1;LRTOMT	5.2e-65
cg20903926	C1orf177	6.27e-65
cg26985798	MS4A15	6.43e-65
cg05918002	USP6	6.46e-65
cg27362525	USP6	6.49e-65
cg26147279	TPRXL	6.65e-65
cg12667595	SFTPD;RP11-479O17.7	6.8e-65
cg03454607	LRRC52	7.01e-65
cg06357685	RP11-424M24.3	7.12e-65
cg01757312	SOX1	7.73e-65
cg06883126	CH17-140K24.1	7.74e-65
cg14856679	NHP2L1	8.18e-65
cg17147317	CR1	9.37e-65
cg00356723	NAA40	9.6e-65
cg03970036	PTPRN	1.11e-64
cg14502484	SLC6A3	1.18e-64
cg22136098	RP11-142I2.1	1.18e-64
cg05965387	DLEU7	1.2e-64
cg01681098	SENCR	1.34e-64
cg15176213	COX7A1	1.41e-64
cg08304190	MIR663A	1.42e-64
cg05921232	CNTF	1.47e-64
cg02254461	CSRNP1	1.53e-64
cg17463145	MAGI2	1.56e-64
cg02296376	MIR1286	1.57e-64
cg19366877	LINC00303	1.63e-64
cg10717463	RP11-849I19.1	1.66e-64
cg04313756	TCL1A	1.75e-64
cg11234172	MIR6832	1.84e-64
cg14239655	RP11-352M15.1	1.88e-64
cg09533178	PPP1R12C	1.92e-64
cg11171811	LTBP3	2.04e-64
cg25339566	TCTEX1D1	2.12e-64
cg13951490	PCDHGA11	2.21e-64
cg03856044	APCS	2.31e-64
cg12033622	COX4I2	2.31e-64
cg05602648	COG2	2.63e-64
cg21884231	SLC7A14	2.71e-64
cg26796069	KIAA1875	3.06e-64
cg11911305	APOC1P1	3.28e-64
cg19268695	CHI3L2	3.33e-64
cg14777768	SLC2A2	3.49e-64
cg07568430	CSF1	3.67e-64
cg06439941	GNG11	3.78e-64
cg08065231	ZNF177	3.78e-64
cg05202804	SWSAP1	3.88e-64
cg14334441	XXbac-BPGBPG24O18.1	3.88e-64
cg17980283	RP11-89K21.2	3.89e-64
cg05429448	RP11-221J22.1	3.98e-64
cg24722950	FLJ22447	4e-64
cg14345012	MIR663A	4.37e-64
cg26945941	RP11-117L5.3	4.55e-64
cg17602167	SRSF3	4.55e-64
cg14838970	CTD-2516F10.2;PPFIBP2	4.59e-64
cg05403316	RTN4	4.59e-64
cg00526711	AC068831.3	4.63e-64
cg03407567	MYL6B	4.85e-64
cg03361633	RP11-23E10.5	4.89e-64
cg15564098	RP1-170O19.17;EVX1	4.99e-64
cg22275125	SLC22A8	5.41e-64
cg15951188	KCNAB3	5.84e-64
cg08486875	RP11-15H20.2	6.28e-64
cg08550839	LGI4;FXYD7	6.4e-64
cg17852791	RP11-700H6.1	6.89e-64
cg17865114	TNFRSF12A	7.05e-64
cg16780771	MIR6504	7.17e-64
cg02970836	AJ003147.9	7.17e-64
cg03840849	MACC1;AC005083.1	7.62e-64
cg04525491	ID2-AS1	7.73e-64
cg19816983	STK19	8.08e-64
cg25247520	MIR1204	8.39e-64
cg06571407	CD40	8.74e-64
cg07553761	RP11-432B6.3	9.2e-64
cg25813936	GNE	9.36e-64
cg03476007	INPP4B	9.68e-64
cg01565777	PRR23C	1.04e-63
cg14010720	PTK6	1.05e-63
cg05876824	HMGA1P7	1.06e-63
cg03940098	MIR663A	1.13e-63
cg06041466	FMO6P	1.17e-63
cg08917933	AKR7A3	1.24e-63
cg27032232	DPP6	1.27e-63
cg25951981	GABRB1	1.33e-63
cg12766383	RP5-1126H10.2	1.51e-63
cg26808687	RP11-465N4.4;RP11-510N19.5	1.53e-63
cg23095743	PITX3	1.63e-63
cg09041678	PAX6	1.68e-63
cg04623265	RP11-365O16.1;DEGS1	1.75e-63
cg22512438	TRH	1.78e-63
cg18254364	RABGGTA	1.84e-63
cg00539360	VEGFA	2.11e-63
cg11912215	TPO	2.21e-63
cg14021880	EMILIN1	2.22e-63
cg09319072	SKOR2	2.23e-63
cg26192720	MIR6748	2.25e-63
cg18102633	PLVAP	2.27e-63
cg27033919	SNORD22;SNORD30;SNORD22;SNORD28;SNORD27;SLC3A2	2.29e-63
cg20911718	NYNRIN	2.31e-63
cg25260137	RP11-32K4.1	2.31e-63
cg27180868	RP11-544M22.13;TSTD1	2.32e-63
cg04078163	VPS51	2.35e-63
cg21068610	NAA38	2.45e-63
cg07181702	MIR21	2.62e-63
cg23193759	C10orf35	2.67e-63
cg24257776	NRADDP	2.69e-63
cg00914963	CTD-2529O21.1	2.78e-63
cg25203962	SLC2A2	2.89e-63
cg10045354	COLCA2	2.9e-63
cg07464571	LEP	3.09e-63
cg10397389	DAPP1	3.37e-63
cg06456717	RP11-815J4.5;ANKRD62	3.51e-63
cg19619405	ADAMTS20	3.79e-63
cg02087565	RP5-894D12.5	3.82e-63
cg22645062	RUVBL2	3.96e-63
cg08891605	BCRP3	4.49e-63
cg03034070	COL5A2	4.67e-63
cg05732750	AC073343.13	5.05e-63
cg25284213	MIR206	5.07e-63
cg11721194	SLAMF7	5.11e-63
cg20012024	F11R	5.29e-63
cg10539274	RASSF6	5.36e-63
cg16678467	CACNG3	5.41e-63
cg16919420	RP3-402G11.27	5.7e-63
cg26678765	MAB21L3	5.7e-63
cg04085076	HOPX	5.74e-63
cg03024301	TRAM2-AS1	6e-63
cg04324666	RP11-15H20.2	6.04e-63
cg00860590	MIR671	6.06e-63
cg00642460	PFN3	7.24e-63
cg13935437	AKR7L	7.68e-63
cg05653018	RP11-465N4.4;RP11-510N19.5	7.84e-63
cg22809920	RBPJL	8.3e-63
cg21642988	RP11-762H8.3	8.64e-63
cg25865120	RP11-154J22.1	8.65e-63
cg07621853	AC016735.3	9.01e-63
cg03626579	CTD-2619J13.9	9.14e-63
cg18831899	USP6	9.4e-63
cg11584690	GRIK5	1.02e-62
cg24091990	RP11-299L17.3	1.08e-62
cg13102889	HES5	1.1e-62
cg01120173	USP6	1.31e-62
cg23403072	CSAG1	1.37e-62
cg15818307	OR2I1P	1.49e-62
cg09238000	RP11-10J21.2	1.53e-62
cg18952796	NPTX2	1.56e-62
cg02483449	RP11-475O6.1	1.58e-62
cg19731612	NSD1	1.92e-62
cg09549611	SNORD62A	1.97e-62
cg21876626	SALL2	2.18e-62
cg06590170	MIR1275	2.27e-62
cg17437939	TAC1	2.53e-62
cg21156320	RDH5	2.73e-62
cg06075438	RP11-94C24.8	2.96e-62
cg14601357	PTK6	3.06e-62
cg22433759	LINC00469	3.37e-62
cg08462055	Y_RNA	3.52e-62
cg19360104	SHE	3.61e-62
cg24387285	PLXNB2	3.77e-62
cg26493224	THSD1	3.93e-62
cg07833342	RP5-828H9.1	3.97e-62
cg03760839	TBX15	4.06e-62
cg07048519	CDRT1	4.18e-62
cg13777783	NPLOC4	4.18e-62
cg21645554	COLCA2	4.18e-62
cg04791129	IGFBP6	4.57e-62
cg11650948	METTL20	4.82e-62
cg05878390	MAB21L2	4.97e-62
cg15475650	PRDX3	5.65e-62
cg26459819	COLCA2	5.98e-62
cg05090351	CTBP2	6.02e-62
cg12196406	FXYD1;CTD-2527I21.4	6.42e-62
cg10019018	RP11-357K6.1	6.52e-62
cg14523847	DPP6	6.88e-62
cg22346476	RNU6-664P;PPP1R14BP2	6.9e-62
cg15298173	RP11-300A12.2;TUBBP8	6.9e-62
cg11731300	RP11-544M22.13;TSTD1	7.35e-62
cg23365801	KCNAB3	8.9e-62
cg09247486	NFIA-AS2	9.73e-62
cg20247048	AMZ2P1	9.78e-62
cg08411068	ZNF709	9.87e-62
cg16110455	CLCNKA	1.05e-61
cg21789085	MIR7160	1.09e-61
cg20798152	CARTPT	1.09e-61
cg23490796	DES	1.12e-61
cg20011248	RNA5SP77	1.18e-61
cg26855231	AC217773.1	1.22e-61
cg01594949	NRARP	1.34e-61
cg04021697	TP73	1.46e-61
cg21205663	RNA5SP127	1.59e-61
cg02926298	RP11-673P17.2	1.65e-61
cg26214742	H2AFY	1.68e-61
cg24838349	KIR2DL4	1.83e-61
cg07660236	ZSCAN12	1.85e-61
cg18568061	PTRF	1.96e-61
cg13703871	ZNF177	1.97e-61
cg04857257	RNU6-925P;OSGIN2	2e-61
cg10755235	SIX6	2e-61
cg10660256	BHMT	2.25e-61
cg03828745	RP11-307E17.8	2.26e-61
cg11934419	LAMA4	2.28e-61
cg05477514	NKX2-6;RP11-175E9.1	2.48e-61
cg23682609	BCAS1	2.52e-61
cg21694941	RP11-17A4.2	2.67e-61
cg19521511	ZNF716	2.74e-61
cg16399049	HS3ST2	3.15e-61
cg15885430	RP11-811I15.1	3.17e-61
cg26522894	TMEM132D	3.24e-61
cg15696968	PPP1R18	3.29e-61
cg04118306	GS1-72M22.1	3.37e-61
cg02515217	MIR21	4.13e-61
cg08636083	HIST2H2BF;HIST2H3D	4.23e-61
cg05080154	RP11-849I19.1;SALL3	4.46e-61
cg16544169	NKX2-6;RP11-175E9.1	4.55e-61
cg18982587	FAM180B	4.74e-61
cg18279094	FOXD3-AS1	4.99e-61
cg10300864	MIR495	5.1e-61
cg00093643	CASC4	5.37e-61
cg20672708	TM9SF4	5.64e-61
cg19059861	BPIFA1	5.83e-61
cg26814075	LEP	5.9e-61
cg27630202	PCDHGA11	6.49e-61
cg06676563	ABCF3	6.64e-61
cg03999434	WNT5B	6.68e-61
cg04574090	KCNE3	6.7e-61
cg15211996	ACTRT2	6.84e-61
cg12623302	ZSCAN12P1	7.06e-61
cg02063846	RP4-738P15.1	7.29e-61
cg26218269	MAB21L2	7.47e-61
cg04534765	GALR1	7.55e-61
cg26026598	RP11-540K16.1	7.72e-61
cg09171112	TENM2	8.24e-61
cg10388456	RSPH10B2	8.35e-61
cg07213202	ELFN1-AS1	9.04e-61
cg17295225	OLIG3	9.14e-61
cg06232807	SALL1	1e-60
cg15484532	AJAP1	1.02e-60
cg25316749	COLCA2	1.25e-60
cg07381930	GOLGA7B	1.27e-60
cg15455864	RSPH6A	1.28e-60
cg16288089	TAC1	1.31e-60
cg25753631	HIST1H2BPS1;HIST1H2APS1;AL512384.1	1.31e-60
cg11823511	BARHL2	1.32e-60
cg12475994	FAM153A	1.33e-60
cg23280754	ALS2CR12	1.35e-60
cg05844977	GNE	1.38e-60
cg04683149	WISP1	1.53e-60
cg26425555	RP11-260E18.1;CTC-461F20.1	1.53e-60
cg26054057	MIR26A1	1.58e-60
cg12390011	RAB19	1.7e-60
cg08481075	COL11A2	1.74e-60
cg19801921	LINC00466	1.78e-60
cg01793387	CCAR2	1.93e-60
cg16459364	RP11-624C23.1	2.01e-60
cg00619207	CHI3L2	2.03e-60
cg10222534	KCNJ14	2.06e-60
cg13092901	SCO2	2.13e-60
cg02919422	SOX17	2.23e-60
cg20449590	RNVU1-8	2.35e-60
cg07434271	PAX6	2.41e-60
cg05127924	FBXW10	2.41e-60
cg15854847	NKX2-6;RP11-175E9.1	2.45e-60
cg05606799	KISS1	2.48e-60
cg20072171	PTPRG-AS1	2.53e-60
cg07207367	LCAT	2.68e-60
cg05693204	CTD-2194D22.5	2.71e-60
cg04608356	SYTL1	2.73e-60
cg09434193	Y_RNA	2.95e-60
cg01407062	PRC1	3.03e-60
cg06073348	RP11-351I21.7	3.15e-60
cg13561879	UNC5D	3.22e-60
cg00174500	CMTM5	3.35e-60
cg26613586	RP4-798A10.4	3.54e-60
cg18462653	DEFB119	3.61e-60
cg05156901	CPT1B	3.84e-60
cg09238180	HOXD8	3.97e-60
cg19796532	RACGAP1	4.18e-60
cg26256192	MIR8085	4.2e-60
cg05513274	LINC01234	4.32e-60
cg19402371	CTD-2105E13.15	4.37e-60
cg24176731	PLEKHB1	5.02e-60
cg22747746	NKX2-6;RP11-175E9.1	5.1e-60
cg00044665	CDH5	5.14e-60
cg05079547	NTM	5.21e-60
cg01967564	C16orf82	5.27e-60
cg18042632	LINC00323	5.46e-60
cg00249511	CDHR5;SCT	5.51e-60
cg06615154	S100A4;S100A3	5.64e-60
cg26243623	RP11-429J17.8	5.83e-60
cg07792478	MIR124-2	6.21e-60
cg26010734	EPHX3	6.47e-60
cg08260891	CTSA	6.57e-60
cg26544665	MIR5687	6.6e-60
cg22981993	ALS2CR11	6.78e-60
cg12950441	HTR2C	7.26e-60
cg00553149	GPC2;STAG3	7.35e-60
cg04127342	RP11-17A4.2	7.39e-60
cg11229513	PRDM14	7.6e-60
cg07037019	OR10J5	7.6e-60
cg11618093	CETN2	7.82e-60
cg22101249	EGFL8	7.84e-60
cg26043322	OR10J5	7.97e-60
cg17495087	RP11-320N21.1;MIR3150A	8.23e-60
cg13524919	OLIG2	8.28e-60
cg05723989	SERTAD4-AS1	8.42e-60
cg09186818	MFRP;MFRP	8.55e-60
cg00669774	RP11-955H22.1	9.79e-60
cg06139614	ADCK5	9.96e-60
cg17306747	SLC6A3	1.01e-59
cg25541968	OR5P3	1.04e-59
cg24672624	CNR2	1.06e-59
cg21000072	TP73	1.06e-59
cg23737737	IFFO1	1.19e-59
cg13482308	RP11-297B17.3	1.25e-59
cg20892260	NKX2-6;RP11-175E9.1	1.28e-59
cg17657179	HAS1	1.31e-59
cg12752647	SPOCK2	1.31e-59
cg03025825	RP11-667K14.14	1.37e-59
cg00406319	CTBP2	1.37e-59
cg07303143	KIAA1143;KIF15	1.41e-59
cg15117754	FANCD2OS	1.42e-59
cg18054674	PCDHGA6	1.43e-59
cg24922090	PCDHGA6	1.46e-59
cg18630644	C6orf201	1.47e-59
cg19238840	GP2	1.5e-59
cg15540820	EOMES	1.5e-59
cg22686523	RP11-192H23.4;SGK494	1.54e-59
cg04765848	PODN	1.54e-59
cg00491180	PRSS30P	1.65e-59
cg06188545	PEAR1	1.74e-59
cg16989719	MLPH	1.75e-59
cg01978368	RSG1	1.89e-59
cg16300838	RP11-122K13.12	1.92e-59
cg21206652	CCDC166	2.02e-59
cg11260715	AC002480.3	2.24e-59
cg15851904	TMEM5-AS1;PABPC1P4	2.26e-59
cg16435923	PCDHGA5	2.34e-59
cg07790615	RYR2	2.48e-59
cg12090740	BCL2	2.54e-59
cg16180552	NCKIPSD	2.64e-59
cg01915791	PROSER3	2.73e-59
cg05393058	RP11-48B14.1	2.77e-59
cg04382077	MIR671	2.8e-59
cg00982519	SFTA1P	2.86e-59
cg23257859	MIR550A2	2.97e-59
cg06942814	HOXA4	3.09e-59
cg26458072	SEC31B	3.12e-59
cg06208270	AL355388.1	3.16e-59
cg01777643	RP11-100E13.1	3.25e-59
cg15692052	HTR2A	3.28e-59
cg13408152	FSTL1	3.37e-59
cg06393354	OR2M3	3.52e-59
cg21072567	FLJ22447	3.53e-59
cg24960947	GAL3ST3;SF3B2	3.59e-59
cg11604182	FAM153C	3.64e-59
cg21105227	LGI4;FXYD7	3.78e-59
cg16269755	RP11-404E16.1	3.79e-59
cg05353872	OR2M3	3.9e-59
cg16202803	AC017028.12	4.09e-59
cg15780361	ALS2CR11	4.1e-59
cg13282837	TCL1A	4.14e-59
cg10378667	PSMD9;RP11-87C12.2	4.34e-59
cg17777676	PCDHA4	4.43e-59
cg14742716	IZUMO2	4.46e-59
cg25479732	CKMT2	4.5e-59
cg13880167	PLAT	4.65e-59
cg08543028	RP11-467L13.4	4.84e-59
cg25562958	AL132709.2;MIR1197;MIR323A;MIR758	4.92e-59
cg17299007	OR2T27	4.96e-59
cg00460049	SGIP1	5.1e-59
cg20812354	OR2M2	5.42e-59
cg02487331	RNVU1-8	5.48e-59
cg03366986	TBX4	5.96e-59
cg18476993	MIR671;RP4-548D19.3	6.05e-59
cg03550233	KRT19	6.14e-59
cg23504924	DNAH5	6.41e-59
cg21485303	ABCC9	6.49e-59
cg09071889	STMN2	6.64e-59
cg18011916	TBX20	6.64e-59
cg02964287	ATP2A1	7.06e-59
cg00690082	STAT5A	7.23e-59
cg13708301	TJP2	7.32e-59
cg09839170	C5orf66-AS1	7.48e-59
cg13333954	ERC1	7.59e-59
cg09340639	FCRL1	8.32e-59
cg12690127	U47924.31;PTPN6	9.11e-59
cg14726637	CR1	9.77e-59
cg11623855	KIAA1549L	1.03e-58
cg01979888	IFFO1	1.08e-58
cg04772948	RP5-1004I9.1	1.1e-58
cg05040501	RP11-895M11.3	1.14e-58
cg22319147	CDH5	1.21e-58
cg01323777	KCNAB3	1.24e-58
cg24673765	PROSER3	1.32e-58
cg17966560	RP11-139I14.2	1.32e-58
cg16513459	KCNAB3	1.32e-58
cg05576262	AJ003147.8	1.36e-58
cg21331510	MIR1249	1.37e-58
cg27517968	RNU6-664P;PPP1R14BP2	1.4e-58
cg00166722	FANCD2OS	1.45e-58
cg22242345	B3GNTL1	1.47e-58
cg00459997	RP11-143E21.3	1.51e-58
cg24335984	HYAL2	1.56e-58
cg09096031	RFTN2	1.62e-58
cg24390913	VAX1	1.67e-58
cg12727940	PLSCR4	1.69e-58
cg19912142	RP11-328K15.1	1.7e-58
cg05967403	GSX1	1.71e-58
cg01297721	HAPLN4	1.72e-58
cg12141030	KIAA1143;KIF15	1.77e-58
cg19507267	RP11-59E19.4;LINC00488	1.8e-58
cg01237056	SCUBE1	1.89e-58
cg15852352	OR10T2	1.95e-58
cg16264705	ATP5G2	1.96e-58
cg00702638	KIAA1143;KIF15	2.02e-58
cg14428146	NKX2-6;RP11-175E9.1	2.23e-58
cg13884871	CTD-2036P10.5	2.32e-58
cg26597242	GABRA1	2.37e-58
cg23034757	PCDHGB6	2.46e-58
cg24432768	CD1D	2.65e-58
cg07907386	RP11-227F19.1	2.8e-58
cg25356393	RP11-358D14.3	2.85e-58
cg20801476	RP1-170O19.17;EVX1	2.86e-58
cg06012804	RP11-135A1.2	2.92e-58
cg03955698	PPP1R10	3.02e-58
cg17613550	RP11-265O12.1	3.11e-58
cg19544372	ZNF560;CTC-543D15.3	3.23e-58
cg01338347	ZNF724P	3.33e-58
cg02770751	PTBP1	3.41e-58
cg23759189	AP003025.2	3.57e-58
cg23571857	XAF1	3.61e-58
cg24415208	CACNG8	3.62e-58
cg04910970	PRDM13	3.83e-58
cg03699566	FOLR1	3.87e-58
cg25364972	RP11-566E18.1	3.89e-58
cg22600043	RSPO2	3.92e-58
cg24259244	ZIC5	4.2e-58
cg24996565	TCL1A	4.33e-58
cg02633729	DNM3OS;MIR199A2	4.41e-58
cg11857704	DCDC2C	4.68e-58
cg26803803	MIR1301	4.7e-58
cg00808170	AC005618.9	4.77e-58
cg06901711	PDIA3P1	5.07e-58
cg01715455	VSX1	5.16e-58
cg04352272	RP11-64J4.2	5.23e-58
cg01921432	BARHL2	5.23e-58
cg20950167	RP11-445F12.2	5.59e-58
cg02762440	CARTPT	5.66e-58
cg18698884	C11orf58	5.67e-58
cg22047282	EMILIN1	5.81e-58
cg21090298	MCF2L-AS1	5.92e-58
cg14994060	C5orf66-AS1	5.98e-58
cg02961004	PCDH15	6.17e-58
cg03156893	PRKCB	6.5e-58
cg04411541	ALS2CR11	6.84e-58
cg13931925	NPHS2;RNU5F-2P	6.9e-58
cg00280812	KRT80	6.92e-58
cg07299510	CES3	7.78e-58
cg17187764	APOBEC1	7.8e-58
cg18116902	RP11-475O6.1	8.04e-58
cg02063695	EIF1AXP1	8.27e-58
cg17195127	SNORA24	8.68e-58
cg19526659	SMIM17	9.88e-58
cg09468836	CTD-2105E13.15	9.91e-58
cg11754318	HOXD12	9.97e-58
cg24304093	CALCB	1.14e-57
cg15658676	KLHL31	1.15e-57
cg02249074	ZNF782	1.2e-57
cg14797990	TAL2	1.23e-57
cg04564920	PARP15	1.25e-57
cg02429905	PPT2;PPT2-EGFL8	1.39e-57
cg25087499	RP11-889L3.4	1.47e-57
cg24069262	CTD-2537I9.13	1.53e-57
cg19951298	GCM2	1.58e-57
cg12010198	AF186192.6	1.93e-57
cg24886257	ZNF350-AS1	1.93e-57
cg00817377	ELN	1.95e-57
cg07703401	HBQ1	1.98e-57
cg15497761	KRTCAP2	1.99e-57
cg21306240	EPHA10	2e-57
cg16601444	MIR320E	2.02e-57
cg00751332	CABLES1	2.05e-57
cg00060374	RP4-758J18.7	2.08e-57
cg17534999	KIRREL3-AS3	2.08e-57
cg16703956	SLC6A3	2.11e-57
cg21263710	RP11-25O3.1;DCC	2.11e-57
cg10201084	RP3-402G11.27	2.13e-57
cg10343742	SOX14	2.36e-57
cg20170777	COX10	2.37e-57
cg02297460	RNU6-1175P	2.38e-57
cg08358276	MIR3177	2.46e-57
cg10164393	CEP85L	2.77e-57
cg00329300	RP11-544M22.13;TSTD1	2.77e-57
cg12378878	DLEU2	2.78e-57
cg04611437	SEC31B	2.92e-57
cg02878244	DBX1	3.04e-57
cg17480461	SCARNA11	3.17e-57
cg19166302	PARP15	3.21e-57
cg05787556	TLX3	3.24e-57
cg22305167	OR2I1P	3.46e-57
cg05364567	USP6	3.46e-57
cg16658460	TENM2	3.61e-57
cg15347189	SST	3.69e-57
cg04739647	HOXD9	3.74e-57
cg05772125	AHSP	4.17e-57
cg23906738	NKX2-1-AS1	4.24e-57
cg04645150	ZBED9	4.33e-57
cg27315635	KCNJ9	4.37e-57
cg24059033	TPTE	4.43e-57
cg09538129	MIR25;MIR93;MIR106B	4.58e-57
cg24641737	CHI3L2	4.58e-57
cg01881444	CTD-2013N24.2	4.67e-57
cg19899008	SLC12A4	4.78e-57
cg01867395	PAX6	5.09e-57
cg04923020	RP11-352M15.1	5.1e-57
cg27455017	RP4-584D14.7	5.38e-57
cg24684077	LINC00941	5.58e-57
cg20747380	HOXA2	5.65e-57
cg00436722	RP11-336A10.7	5.9e-57
cg27207079	PHF19	6e-57
cg06732684	RP11-347H15.4	6.02e-57
cg13114497	AC007326.9	6.06e-57
cg27131891	AL021918.1	6.27e-57
cg23283495	IRF6	6.32e-57
cg04883911	CRYGEP	6.41e-57
cg02583247	FGF6	6.71e-57
cg00581422	RNU2-37P;RUVBL1-AS1	7e-57
cg13377102	KCNAB3	7.11e-57
cg04470878	RP11-449J21.3	7.38e-57
cg16489193	VPS52;RPS18	7.44e-57
cg17885542	GRHL2	7.44e-57
cg20542190	LILRA4	8.11e-57
cg08378505	RP11-649A18.3	8.28e-57
cg10906284	AVPR1A;RP11-715H19.2	8.28e-57
cg13151135	CEP85	8.57e-57
cg21578195	PTK6	8.66e-57
cg08441806	NKX6-2	8.79e-57
cg03128029	SNORD70	9.57e-57
cg16820616	RP5-1024C24.1	9.65e-57
cg08425203	RP11-434H6.2	1.02e-56
cg03196440	UCKL1-AS1	1.05e-56
cg17178220	DNM3OS;MIR199A2	1.07e-56
cg00741410	NOL9;TAS1R1	1.07e-56
cg01717812	ABCB7	1.07e-56
cg10305789	PPP1R16B	1.09e-56
cg09982773	KCP	1.1e-56
cg22686718	LINC00943	1.11e-56
cg13324546	NKX2-6;RP11-175E9.1	1.12e-56
cg22979433	CKMT2	1.13e-56
cg14017460	AC011530.4	1.14e-56
cg03708990	OSBPL7	1.19e-56
cg26073933	MIR9-1	1.22e-56
cg18456942	DEFB118	1.23e-56
cg02338778	AC011239.2	1.31e-56
cg08272268	ZNF281	1.31e-56
cg01731341	FGF6	1.32e-56
cg23884241	HOXA4;HOXA-AS3	1.34e-56
cg26472133	MNX1-AS2	1.34e-56
cg00296158	POU2F1	1.35e-56
cg10074727	GCM2	1.35e-56
cg25073708	C9orf106	1.35e-56
cg00316875	EIF4A2P1	1.37e-56
cg23261107	AC002480.3	1.46e-56
cg17022727	MIR25;MIR93;MIR106B	1.51e-56
cg19161124	DPP6	1.51e-56
cg00769810	RP11-301M17.1	1.52e-56
cg07726139	HIST3H2BA	1.53e-56
cg00650640	EGFL6	1.66e-56
cg04612444	RP11-17A4.2	1.72e-56
cg13586610	TNXB	1.89e-56
cg08186924	NPHS2;RNU5F-2P	1.94e-56
cg15613420	H2AFY	1.95e-56
cg05390307	FEZ1	2.01e-56
cg07332769	U1	2.02e-56
cg24996930	RP11-99E15.2	2.1e-56
cg24182521	PLTP	2.21e-56
cg11324259	CYP11B2	2.29e-56
cg27502912	CPT1B	2.39e-56
cg01046746	PRRG3	2.5e-56
cg24040450	KCNT2	2.51e-56
cg13804461	CTD-2313J17.1;CTD-2313J17.6	2.51e-56
cg06872770	SMIM1	2.53e-56
cg20523861	KLHL1	2.56e-56
cg04355435	EBNA1BP2	2.73e-56
cg13588599	SLC27A4	2.75e-56
cg17098147	SPAG6	2.79e-56
cg21542881	IFNL4P1	2.83e-56
cg06694446	UTS2B	2.87e-56
cg10305299	DEFB115	2.95e-56
cg08927738	BCAS1	3.18e-56
cg01609214	MIR30D	3.24e-56
cg22178613	SFRP2	3.29e-56
cg18560204	BNC1	3.3e-56
cg24613050	SFTPD;RP11-479O17.7	3.3e-56
cg21212076	FAM166B	3.49e-56
cg02520281	PCDHB17P	4.03e-56
cg24861272	ZEB1	4.06e-56
cg18186343	MIR770	4.29e-56
cg25247290	WT1-AS_7;WT1-AS_8	4.43e-56
cg27433088	GALNT7	4.47e-56
cg06964030	MIR3618;MIR1306	4.55e-56
cg02595219	KCNE3	4.72e-56
cg17370785	MIR4800	4.82e-56
cg21232625	COL11A2	5.07e-56
cg13445796	DBX1	5.2e-56
cg07532354	SCGB1D1	5.5e-56
cg14696870	FCER1A	5.62e-56
cg04686545	RP11-412D9.4;TMEM263	5.76e-56
cg22455963	HS6ST2	5.79e-56
cg19775206	FAM181A-AS1	5.95e-56
cg13382769	MAGI2	6.03e-56
cg26264232	HOTAIRM1_2;HOTAIRM1_3;HOTAIRM1_4;HOTAIRM1_5	6.04e-56
cg02156769	PTGDS	6.27e-56
cg17816394	GNG4	6.43e-56
cg15193133	AKAP10	6.68e-56
cg02615833	RN7SL684P	6.85e-56
cg14181527	PAX9	7.27e-56
cg12374721	PRAC1;PRAC2;HOXB13-AS1_1;HOXB13-AS1_2	7.28e-56
cg11208222	C5orf49	7.58e-56
cg11023456	AP001062.9	7.61e-56
cg07195577	NEK8;AC010761.14	7.62e-56
cg11775521	KCNE3	7.64e-56
cg02789362	RNU6-813P	7.92e-56
cg08267888	RP11-19N8.2	8.02e-56
cg10333520	TRANK1	8.15e-56
cg11750883	AL135842.1;CRCT1	8.34e-56
cg23689219	OR10J1	8.36e-56
cg01400884	ZBED9	8.42e-56
cg13153865	RNU6-925P;OSGIN2	8.46e-56
cg00545916	HSF5	8.51e-56
cg21161173	VTRNA1-2	9.04e-56
cg19626158	U1	9.13e-56
cg14482093	CCAR2	9.67e-56
cg14546076	HCG4P8	1.02e-55
cg09775263	GCM2	1.03e-55
cg01038597	AC135050.1	1.08e-55
cg02851397	AC005609.17	1.09e-55
cg09808864	KIAA1244	1.12e-55
cg21217846	S100A5	1.16e-55
cg27461196	CTD-2527I21.5;FXYD1;CTD-2527I21.4	1.2e-55
cg17551002	OR6Y1	1.22e-55
cg04475027	TMEM132C	1.22e-55
cg09643544	ZNF177	1.23e-55
cg17478203	STAT5A	1.3e-55
cg01165362	OR14I1	1.31e-55
cg05722504	RP11-227F19.1	1.32e-55
cg11579116	EMR4P	1.35e-55
cg25647583	FES	1.37e-55
cg10944063	AC013275.2	1.46e-55
cg08873673	FUT2	1.47e-55
cg11479165	RBPMS2	1.48e-55
cg00800229	SALL2	1.63e-55
cg26509250	MIR3679	1.67e-55
cg01360115	PLXNB2	1.78e-55
cg25749101	RP11-649A18.3	1.83e-55
cg06645033	DMRTA2	1.84e-55
cg26619894	MIR1180	1.85e-55
cg21049958	CEACAM4	2.05e-55
cg12457909	AC004837.3	2.05e-55
cg01295203	PRDM14	2.05e-55
cg02558476	ZG16B	2.08e-55
cg15261247	RP11-738B7.1	2.08e-55
cg22694191	HAPLN4	2.12e-55
cg27555582	ABCC9	2.15e-55
cg02050028	HECW1-IT1	2.15e-55
cg24576050	PCDHGA12	2.15e-55
cg05163177	MIR3177	2.16e-55
cg24215776	SLC25A45	2.18e-55
cg02485697	AC124057.5	2.24e-55
cg20996682	MAGI2	2.25e-55
cg17840719	ZNF454	2.31e-55
cg24161793	ITPRIPL1	2.31e-55
cg07552803	RP11-624C23.1	2.33e-55
cg17486097	UNC5D	2.34e-55
cg25743481	KIAA1143;KIF15	2.37e-55
cg02953927	CATSPER2P1;PDIA3	2.39e-55
cg13796381	PTGDS	2.41e-55
cg11201447	MIR1204	2.53e-55
cg16411103	STARD13-AS	2.61e-55
cg24688803	ALDH1L2	2.61e-55
cg26995656	CTD-2007A10.1	2.73e-55
cg02582957	AC013733.3	2.73e-55
cg13288195	FBXL22	2.73e-55
cg24027320	TASP1	2.79e-55
cg11379081	RP11-385M4.3	2.8e-55
cg01171339	HIST1H2BPS2;HIST1H2AL	2.87e-55
cg25121589	GUSBP10	2.92e-55
cg18414381	EHF	2.94e-55
cg22143064	AC008063.3	3.02e-55
cg14202477	KB-1562D12.1;GRHL2	3.04e-55
cg17932631	ITPRIPL1	3.32e-55
cg20025658	CXCR1	3.34e-55
cg12724221	AVPI1	3.37e-55
cg05195566	ISLR	3.5e-55
cg24002149	DNM3OS;MIR199A2	3.56e-55
cg13816466	LINC00961	3.6e-55
cg10828284	MOV10L1	3.66e-55
cg27561907	PRSS41	3.67e-55
cg08957564	RP11-166B2.1;RP11-166B2.7	3.83e-55
cg25545500	OR8K1	3.89e-55
cg19785066	CD40	4.33e-55
cg27227029	RP11-108M9.4;RP11-108M9.5	4.35e-55
cg03194122	PSAPL1	4.37e-55
cg11397301	SCG5	4.41e-55
cg08129583	GYPC	4.45e-55
cg03783663	KLHL1	4.46e-55
cg21488066	ZSCAN12	4.5e-55
cg14212748	KRT8;AC107016.1	5.14e-55
cg14737994	ZNF177	5.36e-55
cg15225325	RP11-1334A24.6	5.36e-55
cg01446571	AC003958.2	5.56e-55
cg24930536	NPLOC4	5.74e-55
cg17283453	ZNF177	5.77e-55
cg04911307	IQCK	5.8e-55
cg07013104	PLEKHB1	5.96e-55
cg26347197	RP11-475O6.1	6.01e-55
cg06563066	XXbac-BPG300A18.13	6.76e-55
cg20098710	YJEFN3	6.95e-55
cg07350501	CTD-2014E2.5;CSDAP1	7.13e-55
cg25665606	KLHDC7B	7.39e-55
cg26827653	FEZ1	7.68e-55
cg04574507	CD1B	7.77e-55
cg15272362	VSX1	7.77e-55
cg12773197	RP11-65D24.2	7.84e-55
cg11909748	ZNF578	8.08e-55
cg05520409	SOX8	8.25e-55
cg21971621	SNX32	8.26e-55
cg08857221	LINC01137	8.4e-55
cg12792526	LINC00111	8.51e-55
cg09607679	PRR15L	8.65e-55
cg01897797	SALL2	8.69e-55
cg08229358	NPHS2;RNU5F-2P	8.7e-55
cg10690283	RP11-849F2.5	8.98e-55
cg23047544	MIR199A1	9.16e-55
cg05979400	OST4	9.24e-55
cg21009400	RP11-395E19.3;RP11-395E19.2;RP11-395E19.4	9.25e-55
cg03951833	RP11-495P10.3;Y_RNA	9.36e-55
cg02569115	TIMP2	9.47e-55
cg01187920	CARTPT	9.82e-55
cg05210558	AP003025.2	9.85e-55
cg13227481	DES	1.02e-54
cg26615853	RNA5SP321	1.05e-54
cg22779330	MYEOV	1.08e-54
cg08460635	MIR26B	1.21e-54
cg16468729	CXCL8	1.22e-54
cg22203219	IFFO1	1.23e-54
cg06462727	MYCLP1	1.26e-54
cg10423771	DRGX	1.29e-54
cg17478228	ELAVL3	1.29e-54
cg24154699	AC245036.1	1.39e-54
cg26988331	RP11-449P15.2	1.41e-54
cg03719128	ZEB1	1.41e-54
cg09687738	HTR2C	1.47e-54
cg12346592	CASC4P1	1.57e-54
cg08331427	ECSCR;ECSCR	1.59e-54
cg26952618	TVP23A	1.6e-54
cg01937809	LINC01137	1.63e-54
cg17205313	TTC39C	1.7e-54
cg07954324	CYP11B2	1.77e-54
cg27441045	GHc-210E9.2	1.78e-54
cg26333618	VDR	1.78e-54
cg25420238	P2RY10	1.83e-54
cg05387399	HMX3	1.92e-54
cg01184591	GUSBP10	1.95e-54
cg02299497	CTD-2325P2.4	1.98e-54
cg06550984	PTF1A	1.98e-54
cg19570775	GLDCP1	1.99e-54
cg20869844	RAB19	2e-54
cg25037841	MIR1286	2.02e-54
cg13492803	SCG5	2.09e-54
cg03402459	OR2I1P	2.15e-54
cg01345315	ADAMTS20	2.2e-54
cg18376306	SNORD45B	2.26e-54
cg08093097	C2orf80	2.32e-54
cg15907146	MIR3675	2.33e-54
cg24554839	MIR921	2.39e-54
cg15326452	TCF23	2.48e-54
cg08008475	RNY1P1	2.49e-54
cg05163509	TMOD4	2.54e-54
cg11200963	SLC22A8	2.57e-54
cg24361265	SERF2	2.67e-54
cg08983217	ITPRIPL1	2.67e-54
cg19801120	KLHL31	2.68e-54
cg02759725	OC90	3.02e-54
cg23081026	TMEM200B	3.14e-54
cg01034396	SMAD9;LAMTOR3P1	3.17e-54
cg26170569	AC018804.7	3.23e-54
cg26465391	ZNF154	3.37e-54
cg05772850	MIR5587	3.4e-54
cg00017489	DPP6	3.41e-54
cg17717124	TCL1A	3.44e-54
cg02470871	CD80	3.59e-54
cg14030904	ZC3H12D	3.76e-54
cg27250427	RP5-856G1.1	3.92e-54
cg23883696	RP11-676J15.1	4.1e-54
cg12089570	ZNF177	4.2e-54
cg09456254	LINC00323	4.24e-54
cg08066035	F2RL3	4.27e-54
cg14022090	EHF	4.41e-54
cg01146232	SALL1	4.65e-54
cg20531550	KCP	5.43e-54
cg06307176	MEIKIN	5.43e-54
cg14222245	CTD-2619J13.5	5.53e-54
cg23157948	RP11-117L5.4	5.59e-54
cg12983285	PTK6	5.63e-54
cg10397440	PENK	5.65e-54
cg14006181	RP11-966I7.2	5.79e-54
cg21553182	ZNF578	5.99e-54
cg15699226	RNF219-AS1	6.02e-54
cg03300268	DEXI	6.26e-54
cg15239904	RP3-481F12.1	6.31e-54
cg02921624	SCGB1B2P	6.47e-54
cg26024682	MIR670	6.51e-54
cg14699728	NPAS4	6.52e-54
cg19317715	AOC2	6.57e-54
cg08900371	SERTAD4-AS1	6.65e-54
cg23079782	P2RY10	6.74e-54
cg07807165	RP11-475O6.1	6.94e-54
cg07657465	ZNF208	7.06e-54
cg09649610	GNG4	7.38e-54
cg25952581	HOXA4	7.62e-54
cg04851268	GHSR	7.64e-54
cg26881287	LGALS13	7.89e-54
cg02366262	RP11-142I2.1	8.56e-54
cg00332882	RP5-1004I9.1	8.66e-54
cg12798157	AKR7L	8.86e-54
cg26911220	HIST3H2BA	9.19e-54
cg06532268	HIST1H2BPS1;HIST1H2APS1;AL512384.1	9.25e-54
cg25092838	OTX2;OTX2-AS1	9.26e-54
cg18808904	RP4-742J24.2	9.43e-54
cg00803692	CCR5	9.47e-54
cg18090390	RP4-710M16.2	9.53e-54
cg16481170	KIAA2022	9.53e-54
cg18770739	OR10P1	9.88e-54
cg21542643	CYP3A43	1.01e-53
cg07352544	SEPN1	1.02e-53
cg10829629	SNCG	1.04e-53
cg14738670	LGI4;FXYD7	1.05e-53
cg15226029	AGER	1.05e-53
cg27252696	SIM1	1.1e-53
cg00076538	EGFLAM	1.12e-53
cg22153239	MEI1	1.13e-53
cg09220167	USP19	1.14e-53
cg05452854	RP11-56L13.1	1.26e-53
cg01750611	AC010761.6	1.26e-53
cg19780563	EXOC6	1.34e-53
cg10808936	ACKR1	1.35e-53
cg05780006	MIR3671;MIR101-1	1.35e-53
cg16662451	FBXW10	1.36e-53
cg20965743	ASPG	1.41e-53
cg26118553	AC010872.1	1.56e-53
cg04835284	SEC31B	1.58e-53
cg07921625	RP11-95F22.1	1.64e-53
cg03233940	CTD-2086O20.1	1.76e-53
cg24805759	CTD-2529O21.2	1.79e-53
cg05174942	VTRNA1-2	1.8e-53
cg03287111	RP11-297J22.1	1.81e-53
cg26405020	FES	1.85e-53
cg01917716	MS4A3	1.85e-53
cg26460678	HYAL2	1.86e-53
cg15543452	RFESD	1.97e-53
cg17939585	PLXNB2	2.02e-53
cg23366166	FEZ1	2.07e-53
cg06616729	RP11-53M11.5	2.16e-53
cg07652854	SEMA3C	2.36e-53
cg24745495	EPHX3	2.37e-53
cg19628333	RBMS2	2.37e-53
cg20814718	UNC5D	2.38e-53
cg16030177	IRF6	2.41e-53
cg17684207	PACRG-AS1	2.44e-53
cg17162576	SGIP1	2.48e-53
cg20831708	SEC31B	2.5e-53
cg19404813	CRYGD	3.06e-53
cg02002551	GS1-72M22.1	3.17e-53
cg02076020	RP11-465N4.4;RP11-510N19.5	3.23e-53
cg14610403	SGIP1	3.25e-53
cg01834614	ACP6	3.39e-53
cg09137301	ZBED6CL	3.4e-53
cg26186727	RP11-676J15.1	3.42e-53
cg26381313	SEC31B	3.51e-53
cg13068653	AP000892.6	3.52e-53
cg13578134	MIR4513	3.65e-53
cg17419888	AC011239.2	3.84e-53
cg06714705	OLFML1	3.95e-53
cg25390440	GYPC	4.05e-53
cg24712243	RP11-794G24.1	4.41e-53
cg03557698	C1orf177	4.52e-53
cg02500479	AC005609.17	4.56e-53
cg24496475	NKX1-1	4.62e-53
cg21304833	ADPRHL1	4.64e-53
cg24250684	RP11-95P13.2	4.69e-53
cg00489219	ZNF621	4.78e-53
cg23192873	LRRD1	5.34e-53
cg13570972	PAX6	5.38e-53
cg21185686	PCDHGA12	5.39e-53
cg03042666	AC017028.12	5.44e-53
cg18741586	MUSTN1	5.48e-53
cg04321618	HOXA4	5.54e-53
cg07337598	ANXA9	6.02e-53
cg16519842	HIST2H2BB;RP5-998N21.7	6.06e-53
cg25802093	SPAG6	6.21e-53
cg17916432	CRYGD	6.28e-53
cg10055566	NKAPL	6.36e-53
cg13762704	AC245036.1	6.41e-53
cg01820665	AP000345.2	6.46e-53
cg21929564	CCDC152	6.54e-53
cg13525276	CEP128	6.68e-53
cg02336143	PCDHGA8	6.98e-53
cg17926950	MIR181C	7.21e-53
cg20455436	NAT14	7.49e-53
cg22234712	RP11-320N21.1;MIR3150A	7.73e-53
cg02216727	GJD3	7.75e-53
cg03051392	HYAL2	8.39e-53
cg02994956	NEFH	8.45e-53
cg21123519	CTD-2325P2.4	8.71e-53
cg13758780	DAB2IP	8.74e-53
cg08534628	LINC00554	8.93e-53
cg24425838	AL450992.2	1.02e-52
cg00048759	GPC2;STAG3	1.03e-52
cg09287359	LGALS7B	1.05e-52
cg20465661	OR2T6	1.08e-52
cg03514843	EMILIN1	1.09e-52
cg19997502	METTL21A	1.15e-52
cg15818604	LINC00535	1.16e-52
cg03527802	AC009133.15;AC009133.24	1.17e-52
cg19170009	RP11-124N14.3	1.17e-52
cg10591771	AC004637.1	1.18e-52
cg26134665	STX1B	1.18e-52
cg13851767	PHF19	1.18e-52
cg00765128	NKAPL	1.19e-52
cg09663494	EXOC3L1	1.21e-52
cg02621287	RP11-434C1.4	1.31e-52
cg00594148	LCAT	1.35e-52
cg13381984	LEP	1.36e-52
cg26503073	AC073343.13	1.38e-52
cg05266537	ZNF91	1.54e-52
cg12820134	RP11-669N7.2	1.57e-52
cg04107005	SPACA7	1.63e-52
cg24608381	NXPH2	1.63e-52
cg06580419	VWC2L	1.66e-52
cg20366906	PCDH8	1.67e-52
cg07769790	CPEB1	1.68e-52
cg27137258	PRSS30P	1.69e-52
cg07697597	SCUBE1	1.74e-52
cg08884591	SCGB2A2	1.77e-52
cg13870494	MAMDC2	1.79e-52
cg10522115	SAMD8	1.81e-52
cg26389500	DEFB131	1.81e-52
cg20038038	AC245036.1	1.83e-52
cg07705908	SPDEF	1.94e-52
cg03249630	ANKRD22	1.95e-52
cg23121156	SFRP2	1.97e-52
cg24544490	RUSC1	1.99e-52
cg15915602	LINC01191;AC110769.3	2.01e-52
cg13857025	RP11-83B20.3	2.02e-52
cg05452406	GCM2;RP11-637O19.2	2.07e-52
cg13725599	OXT	2.08e-52
cg01518591	OR10C1	2.09e-52
cg26523005	ZNF662	2.39e-52
cg11742898	SND1-IT1	2.39e-52
cg22862656	SCGB2A2	2.4e-52
cg24324354	ARHGEF25	2.44e-52
cg07897871	RP11-465N4.4;RP11-510N19.5	2.45e-52
cg16484042	MIR365A	2.45e-52
cg26776957	PLEKHB1	2.47e-52
cg03198203	OR7E14P	2.54e-52
cg24328095	RP13-516M14.8	2.6e-52
cg06123346	ATP4A	2.7e-52
cg24584161	BUB1B	2.79e-52
cg17105014	GYPC	2.83e-52
cg18712755	MIR6832	2.87e-52
cg27120999	RP11-973N13.4	2.98e-52
cg09842118	RNASE3	2.99e-52
cg18857588	MIR4326	3.06e-52
cg09871043	PKHD1	3.13e-52
cg12660439	AC099668.5	3.14e-52
cg02805814	CTD-3099C6.7	3.15e-52
cg05665651	RP1-168P16.3	3.23e-52
cg05828624	REG1A	3.26e-52
cg03689092	LIMS2	3.32e-52
cg14591352	SPACA7	3.33e-52
cg09388605	XKR4	3.36e-52
cg04361266	LYRM1	3.39e-52
cg18867912	WDR88	3.44e-52
cg24173629	CTA-221G9.10	3.45e-52
cg17214107	FGF2;AC021205.1	3.51e-52
cg24318763	CLEC2L	3.55e-52
cg06473363	CSNK2B;CSNK2B-LY6G5B-562	3.56e-52
cg25021051	RP11-983P16.4	3.58e-52
cg15526213	RP11-168L22.2	3.65e-52
cg04375492	RP11-552F3.9	3.7e-52
cg27648270	MIR199A1	3.79e-52
cg01559901	ZNF709	3.87e-52
cg19016332	NPHS2;RNU5F-2P	4.16e-52
cg08109815	NMBR;RP11-137J7.2	4.23e-52
cg02254407	PLEKHB1	4.25e-52
cg19232929	ACVRL1	4.37e-52
cg24339574	LINC00184	4.54e-52
cg12336960	UTS2B	4.61e-52
cg13478617	LA16c-316G12.2	4.62e-52
cg14244402	ST6GALNAC4	4.62e-52
cg17011276	PCDHGB7	4.73e-52
cg20122727	BTC	4.81e-52
cg22304612	CPXM1	4.81e-52
cg00062282	PLXNB2	4.94e-52
cg16009970	YBX2	4.98e-52
cg10689404	RP11-445F12.2	5.06e-52
cg15060599	FGD5P1	5.39e-52
cg06218186	MIR25;MIR93;MIR106B	5.45e-52
cg19447686	RP11-983P16.4	5.6e-52
cg03348397	RP11-1070A24.2	5.86e-52
cg12599673	CT62	6.23e-52
cg24105407	NOL9;TAS1R1	6.38e-52
cg02400433	PRDM13	6.48e-52
cg14662886	SNORA6	6.71e-52
cg11744144	AOC3	6.81e-52
cg03247919	KIR2DL4	7.12e-52
cg26822501	Y_RNA;LTBP1	7.64e-52
cg25673784	RP11-567J20.2	8.05e-52
cg18350545	OR2M1P	8.41e-52
cg05802386	SLC2A1-AS1	8.48e-52
cg10084644	GPC2;STAG3	8.64e-52
cg12297642	LACTB	8.89e-52
cg01037823	ZG16B	8.89e-52
cg03721058	HYAL2	8.95e-52
cg15393221	PRX	9.01e-52
cg18853199	RP11-285E9.6	9.52e-52
cg13210467	GPC2;STAG3	9.7e-52
cg10718130	GS1-393G12.12	9.78e-52
cg11998307	SCARF1	9.84e-52
cg25061289	NDN	1e-51
cg03843721	RP11-789C17.3	1.03e-51
cg15006843	NUCKS1	1.03e-51
cg27516568	TMEM155	1.05e-51
cg19516515	RUSC1	1.06e-51
cg04937596	C12orf71	1.07e-51
cg25464921	CCDC181	1.07e-51
cg10616411	C10orf82	1.1e-51
cg09968709	DEFB115	1.11e-51
cg16345647	RIPPLY3	1.13e-51
cg21165029	MXRA8	1.14e-51
[truncated: 96,644 more rows]

## Sheet: COAD
probe	gene	adj.P.Val
cg22689909	GLRX	5.98e-149
cg12628196	LRRC4	2.52e-122
cg09087503	LRRC4	3.96e-110
cg19592277	GPR75-ASB3;GPR75	2.86e-109
cg16601494	TMEM240	6.42e-103
cg13405887	C9orf50	2.34e-101
cg27539480	HOXA-AS2	1.48e-95
cg12451530	GPR75-ASB3;GPR75	1.48e-95
cg01817009	LCAT	1.26e-94
cg13356253	GPR75-ASB3;GPR75	1.04e-92
cg19664945	GPR75-ASB3;GPR75	1.21e-90
cg09544728	AC147651.5	2.23e-89
cg08611810	GPR75-ASB3;GPR75	3.44e-89
cg11315991	AC147651.5	2.02e-86
cg20778958	OR6P1	2.99e-85
cg09340639	FCRL1	1.01e-84
cg16306898	TMEM240	2.89e-84
cg01029623	RP13-941N14.1	3.83e-84
cg03241244	RP13-941N14.1	7.09e-83
cg18058689	RP11-632L2.2	1.69e-81
cg01876338	GPR75-ASB3;GPR75	2.73e-80
cg14216068	HOXA-AS2	1.67e-79
cg00834924	CTD-2262B20.1	2.2e-78
cg10077746	RP11-823E8.3	1.83e-77
cg12097883	RP11-927P21.4;MIR6080	1.32e-76
cg21995919	ITGA4	2.55e-76
cg16792800	RP11-632L2.2;GPC6	1.43e-75
cg16677191	GLRX	2.03e-75
cg14832904	GPR75-ASB3;GPR75	9.27e-75
cg03852144	GLRX	2.77e-74
cg05053327	CCR10	3.61e-74
cg00701946	GPR75-ASB3;GPR75	3.63e-74
cg06134860	LCAT	7.55e-74
cg19878627	GPR75-ASB3;GPR75	9.06e-74
cg19131313	CLN8	2.51e-72
cg00421139	GDF6	5.5e-71
cg06952671	ITGA4	1.22e-70
cg26709300	RP11-455F5.3	4.21e-70
cg11327659	RP4-584D14.7	1.7e-69
cg07153966	HOXA-AS2	2.28e-69
cg05414908	GPR75-ASB3;GPR75	2.43e-69
cg09701880	MIR4435-1HG;AC017002.2	5.79e-69
cg00804628	NXPH2	9.85e-68
cg06617456	PREX2	1.37e-67
cg26904260	MIR7154	1.42e-67
cg17459204	PREX2	4.29e-67
cg06383163	FAM135B	5.82e-67
cg22664296	GUCY1B3	6.82e-67
cg03320492	RNU5F-1	7.18e-67
cg21479226	RP11-664D7.4	1.94e-66
cg12647497	GSTM2	2.26e-66
cg09571345	RP13-16H11.7	1.38e-65
cg27467929	PREX2	1.68e-65
cg02022733	PCDHGC4	1.94e-65
cg17783086	RP11-927P21.4;MIR6080	2.53e-65
cg12648074	PCDHGC4	6.45e-65
cg06433467	CTC-537E7.3	6.51e-65
cg06392169	IRF4	8.78e-65
cg07576142	RP11-632L2.2	1.1e-64
cg16587616	KHDRBS2	1.53e-64
cg04504205	RP4-569M23.5	1.63e-64
cg06884882	RNU5F-1	1.67e-64
cg06668555	FAM135B	3.6e-64
cg05109569	HOXA-AS2	8.45e-64
cg18150439	NXPH2	8.5e-64
cg21433558	CCR10	1.71e-63
cg15357075	LINC01059	2.15e-63
cg14923640	NXPH2	2.51e-63
cg04988514	GRWD1	3.02e-63
cg21890423	RP11-875H7.2	3.74e-63
cg15745900	PREX2	3.9e-63
cg13314965	TM4SF19-TCTEX1D2;TM4SF19	7.15e-63
cg03357798	RP11-664D7.4;C8orf34	1.09e-62
cg00817367	GRASP	1.15e-62
cg26924825	LCAT	1.18e-62
cg14672084	RN7SL68P;AC008781.1	1.68e-62
cg09731694	C9orf50	1.69e-62
cg09493063	TRBJ2-3;TRBJ2-4;TRBJ2-5;TRBJ2-6;TRBJ2-7	2.48e-62
cg22001496	RP11-664D7.4	2.69e-62
cg26715952	KHDRBS2	2.94e-62
cg27616541	CCR10	3.39e-62
cg19715094	RP11-770J1.3	4.19e-62
cg19961545	GPR75-ASB3;GPR75	6.34e-62
cg23861668	NELL1	7.16e-62
cg23556923	RP11-927P21.4	9.44e-62
cg12738765	OR5M10	1.16e-61
cg14665413	TLR1;TLR6;AC108044.1	1.69e-61
cg02291365	IRX1P1	3.21e-61
cg26818786	CARD6	4.99e-61
cg07746943	CHL1-AS2;CHL1	5.25e-61
cg12164922	RP11-91I20.1	5.86e-61
cg27027375	AC093323.1	7.52e-61
cg12799689	RP11-17E3.1;DOK6	8.35e-61
cg26450106	CST7	8.55e-61
cg02446647	EYA4	1.07e-60
cg14689623	NELL1	1.09e-60
cg16250754	CARD6	1.13e-60
cg23300732	STK32B	1.44e-60
cg06878741	AC147651.5	1.79e-60
cg08323075	STK32B	2.36e-60
cg25696807	MIR891A	3.82e-60
cg02721665	GPR26	5.08e-60
cg15952370	OR8D2;OR8D2	5.4e-60
cg26369418	CSF2	7.37e-60
cg02155398	Six3os1_2;Six3os1_3	8.01e-60
cg13561879	UNC5D	8.3e-60
cg09607276	DRD4	8.45e-60
cg06454760	ZNF135	8.55e-60
cg23581088	RP1-140K8.5	2.18e-59
cg01964852	HOXA-AS2	2.56e-59
cg13407456	RP11-664D7.4;C8orf34	3.38e-59
cg12741420	IRF4	4.36e-59
cg17147045	PREX2	5.44e-59
cg24527881	RNU5F-1	7.56e-59
cg12953249	CRB2	9.68e-59
cg08721908	ANKRD20A8P	1.04e-58
cg13240116	HOXA-AS2	1.29e-58
cg17159058	CLN8	1.34e-58
cg18239753	KHDRBS2	1.75e-58
cg03629943	CNNM1	1.77e-58
cg15175143	NXPH2	2.15e-58
cg16783279	GPR26	2.31e-58
cg10351287	STK32B	3.08e-58
cg19526685	LINC00861	3.5e-58
cg01901262	CTD-3032H12.2	7.91e-58
cg04465154	RP11-10A14.5	7.96e-58
cg12842316	SLITRK4	9.89e-58
cg27032352	LINC00314	9.89e-58
cg15916399	RP11-17E3.1;DOK6	1.02e-57
cg07164631	RP11-1079K10.3	1.23e-57
cg03308399	HOXA-AS2	1.25e-57
cg24089600	COL4A1	1.39e-57
cg07124956	RP4-764D2.1	1.4e-57
cg13467162	SNX32	1.79e-57
cg05598886	MIR1225;RP11-304L19.1	1.89e-57
cg03064067	SLC6A15	1.9e-57
cg22333214	MIR2682;MIR137	2.28e-57
cg22743884	DEFB135	2.47e-57
cg04534765	GALR1	2.62e-57
cg03237648	SFMBT2	3.14e-57
cg23322242	AP000695.6	3.29e-57
cg23056157	NALCN	3.45e-57
cg27501878	BHLHE23	5.23e-57
cg04398581	KHDRBS2	5.37e-57
cg12989574	RP11-632L2.2;GPC6	6.05e-57
cg04551925	AQP1	6.47e-57
cg24203709	SPTBN5	6.68e-57
cg00282706	ANO2	6.84e-57
cg25724283	DCLK1	8.37e-57
cg04708601	RP11-93K7.1	1.09e-56
cg23294090	FAM135B	1.2e-56
cg03942855	GSTM2	1.2e-56
cg08421685	CHL1-AS2;CHL1	1.33e-56
cg23977631	LONRF2	1.33e-56
cg15949044	PCDHGC4	1.81e-56
cg11942059	COL9A1	1.92e-56
cg14675211	LONRF2	1.97e-56
cg05445326	TM4SF19-TCTEX1D2;TM4SF19	2.22e-56
cg14252519	COL5A1	2.23e-56
cg00593536	NXPH2	2.29e-56
cg10989763	NXPH2	2.58e-56
cg20107395	DOK5	3.12e-56
cg07304692	LONRF2	3.29e-56
cg18074820	RP11-35O15.2	3.37e-56
cg21546211	ATF4P4;RP11-667M19.5	3.76e-56
cg21859781	GDF6	5.59e-56
cg12065366	CHL1-AS2;CHL1	5.95e-56
cg27341128	DOK5	6.62e-56
cg12869615	GPRASP1	6.62e-56
cg03414318	DLGAP4	9.39e-56
cg20747380	HOXA2	1.31e-55
cg15237494	ADAMTS5	1.68e-55
cg04681489	LINC01059	1.88e-55
cg01568998	PREX2	3.09e-55
cg15694715	RP11-770J1.3	3.65e-55
cg25649000	RP1-269M15.3	3.75e-55
cg11163620	GLRB	3.92e-55
cg05177629	SEMG1	4.07e-55
cg02382400	RP4-794I6.4	4.78e-55
cg13936387	RNASEH2A	5.13e-55
cg12345672	LRRC4	6.09e-55
cg15044270	TM4SF19-TCTEX1D2;TM4SF19	6.92e-55
cg14997226	LONRF2	7.13e-55
cg23244095	TMEM240	8.75e-55
cg25088758	COL25A1;AC004051.2	1.02e-54
cg13823136	ST6GALNAC5	1.27e-54
cg27106909	RP11-455F5.3	1.4e-54
cg03502002	GALR1	1.85e-54
cg15202954	NALCN	2.24e-54
cg24280540	RP11-664D7.4	2.4e-54
cg22065614	GLRB	2.54e-54
cg06499030	HLA-DQB2	3.08e-54
cg08301181	MIR4738;UNK	4.17e-54
cg07225966	RP11-348J12.2;CYP26C1	5.42e-54
cg15644671	RP11-348J12.2;CYP26C1	5.42e-54
cg14783814	MIR2682;MIR137	6.21e-54
cg08701621	ZNF135	6.73e-54
cg15975865	GYPC	9.24e-54
cg17331296	ANK1	9.7e-54
cg16201674	SOX21;SOX21-AS1	1.17e-53
cg09073398	SLIT3	1.35e-53
cg21566642	ECEL1P1	2.17e-53
cg13356896	BOLL	3.92e-53
cg24169915	C14orf177	4.32e-53
cg07036112	MIR1225;RP11-304L19.1	4.49e-53
cg06428620	PCDHGC4	4.57e-53
cg00374672	TRIP6	5.03e-53
cg27365701	RP11-823E8.3	5.12e-53
cg10039188	LINC00472	5.51e-53
cg15874092	CDH4	8.36e-53
cg20061155	RSPO2	1.05e-52
cg00431602	Y_RNA;SAT1	1.14e-52
cg19824907	RP11-632L2.2;GPC6	1.16e-52
cg10401879	NRG3	1.16e-52
cg14260530	AKNA	1.25e-52
cg03532331	RP11-462G12.1	1.33e-52
cg24885417	NPY	1.46e-52
cg05673756	NALCN	1.53e-52
cg10132917	AQP1	1.63e-52
cg16964348	NPY	1.67e-52
cg22757824	COL4A1	1.85e-52
cg16896079	PDZRN4	2.26e-52
cg03403065	PTPRT;RP1-269M15.3	2.6e-52
cg26529044	FAM216B	2.67e-52
cg20219457	DCLK1	2.72e-52
cg03391684	KAZN	2.77e-52
cg00741836	DOK5	2.79e-52
cg22730004	SPTA1	2.8e-52
cg21585438	LPHN3	3.16e-52
cg25570913	LINC00403	4.25e-52
cg08155325	RN7SL68P;AC008781.1	4.45e-52
cg22403344	MAL	4.47e-52
cg11885396	SLC6A17	4.53e-52
cg23413506	RP4-794I6.4	4.78e-52
cg02970297	DPY19L2P2	5.07e-52
cg11979589	COL25A1;AC004051.2	5.7e-52
cg07095995	COL25A1;AC004051.2	6.68e-52
cg03656899	KHDRBS2	8.38e-52
cg01776298	CTD-2385L22.2	8.69e-52
cg20810997	DEFB119	8.86e-52
cg23575876	SLITRK4	9.81e-52
cg24054190	FGF12-AS2;FGF12-AS3	1.09e-51
cg04481096	HOXA2	1.12e-51
cg06360427	GALR1	1.23e-51
cg25884711	NPY	1.24e-51
cg04050867	RSPO2	1.27e-51
cg08430489	TRBJ2-3;TRBJ2-4;TRBJ2-5;TRBJ2-6;TRBJ2-7	1.37e-51
cg21621906	TRBJ2-3;TRBJ2-4;TRBJ2-5;TRBJ2-6;TRBJ2-7	1.45e-51
cg11723848	UNC5C;RP11-710C12.1	1.67e-51
cg13078140	SLIT2	1.93e-51
cg18252309	DPP6	2.09e-51
cg09528825	GSG1L	2.63e-51
cg07628404	DPY19L2P1	3e-51
cg04921989	GNAQP1	3.73e-51
cg14373923	BHLHE23	3.84e-51
cg07212778	C1QL2	4.1e-51
cg03422911	RYR2	4.49e-51
cg21145524	CHL1-AS2	4.57e-51
cg27272220	GUCY1B3	6.73e-51
cg19875547	AMPH	7e-51
cg24524352	ANKRD20A8P	7.34e-51
cg27347269	RP11-17E3.1;DOK6	8.46e-51
cg15316843	RP11-32K4.1	1.01e-50
cg27361134	RIMS4	1.07e-50
cg08829841	RP11-288A5.2;FOXI2	1.16e-50
cg17892556	ZNF625-ZNF20;ZNF625	1.22e-50
cg25432738	MIR4499	1.36e-50
cg13794530	VIPR2	1.51e-50
cg13378656	TRBJ2-1;TRBJ2-2;TRBJ2-2P;TRBJ2-3;TRBJ2-4;TRBJ2-5;TRBJ2-6;TRBJ2-7	2.18e-50
cg26433102	IRF4	2.26e-50
cg22601348	RP11-664D7.4	2.33e-50
cg23144473	TRGV10	2.51e-50
cg13001868	SPATA32	2.61e-50
cg25116216	GAS7	2.67e-50
cg22795470	HECW1	2.79e-50
cg04529370	NRG3	2.9e-50
cg20645040	RP4-569M23.5	2.95e-50
cg04549162	GPR26	3.18e-50
cg14409559	MSC	3.33e-50
cg00910695	RSPO2	3.59e-50
cg11127249	IL2RA	4.24e-50
cg02532096	LAYN	4.36e-50
cg27296664	SLITRK4	4.44e-50
cg21858380	C1QL2	4.86e-50
cg03109827	TCERG1L	5.63e-50
cg15048991	CTD-2297D10.2;ADAMTS16	5.82e-50
cg14269807	TRAV3	6.12e-50
cg13692446	LINC00403	6.15e-50
cg10603275	CHL1-AS2	6.81e-50
cg05981038	CARD6	7.07e-50
cg04136610	CTD-2297D10.2;ADAMTS16	7.67e-50
cg25340966	TBX15	8.76e-50
cg23572908	VIPR2	9.87e-50
cg09424759	SLC35F3	1.07e-49
cg20647257	AC147651.5	1.31e-49
cg10647025	MIR892A;MIR892B	1.37e-49
cg11893763	GPR26	1.57e-49
cg08205639	AC025171.1	1.62e-49
cg02736420	SOX21;SOX21-AS1	1.72e-49
cg17037355	RP4-794I6.4	1.75e-49
cg18975416	MIR4425	1.75e-49
cg04188273	COL25A1;AC004051.2	1.78e-49
cg05151154	SALL1	1.96e-49
cg07554357	MAB21L1	2.28e-49
cg23632875	TCERG1L	2.34e-49
cg20127859	MROH6	2.38e-49
cg11334644	RP11-474D1.4;RP11-474D1.3	2.52e-49
cg00091285	MIR2682	2.55e-49
cg13485320	SLC22A18	3.11e-49
cg05447008	KCNQ5	3.38e-49
cg14646244	SLC26A4	3.76e-49
cg11595545	KCNA3	3.8e-49
cg27296293	RP11-748H22.1	4.81e-49
cg16857113	CNTN6	5.1e-49
cg00472801	KHDRBS2	5.17e-49
cg25259754	FCRL3	5.37e-49
cg23095743	PITX3	5.82e-49
cg14416371	MIR129-2	6.28e-49
cg25973534	CTD-2297D10.2;ADAMTS16	6.28e-49
cg23217126	RP11-17E3.1;DOK6	6.58e-49
cg05166490	ANK1	7.04e-49
cg18884037	KHDRBS2	7.06e-49
cg21234123	RP11-413M3.4	7.2e-49
cg13168820	PTPRT;RP1-269M15.3	7.37e-49
cg05701791	GDF6	8.99e-49
cg12384572	USP4	9.17e-49
cg01410878	C17orf102	9.75e-49
cg00020052	CNRIP1	9.77e-49
cg03738669	RP4-794I6.4	1.01e-48
cg05766140	IRF4	1.25e-48
cg22014661	KHDRBS2	1.26e-48
cg13195526	IL22	1.3e-48
cg21133153	OR2I1P	1.41e-48
cg11052535	OR9G1	1.42e-48
cg01638592	CUX2	1.5e-48
cg02441747	COL25A1;AC004051.2	1.97e-48
cg16368442	GRIN2A	2.31e-48
cg04763554	MIR2682;MIR137	2.5e-48
cg21097881	NPY	2.92e-48
cg07697895	WNT2	2.94e-48
cg03864000	LAYN	3.06e-48
cg23445461	PCDHGC4	3.06e-48
cg12456714	MARCH11;RP11-19O2.2	3.25e-48
cg07918545	RP11-288A5.2;FOXI2	3.77e-48
cg18092028	CDH4	4.13e-48
cg04638468	TMEM155	4.15e-48
cg16700392	GUCY1B3	4.16e-48
cg04021697	TP73	4.17e-48
cg01500945	SALL1	4.63e-48
cg15818307	OR2I1P	4.84e-48
cg01663016	SLIT3	4.99e-48
cg17988310	RP3-370M22.8	5.15e-48
cg01715455	VSX1	5.57e-48
cg12017745	SIPA1	5.96e-48
cg18497238	CTD-2207P18.2	6.16e-48
cg03804213	SERTM1	6.7e-48
cg21304453	RP4-794I6.4	7.61e-48
cg27546977	OR2I1P	7.64e-48
cg20230721	TFPI2;AC002076.10	1.04e-47
cg17890940	ELFN1-AS1	1.04e-47
cg16422098	ITGA8	1.11e-47
cg19377250	TRIP6	1.15e-47
cg07945335	CD300LG	1.18e-47
cg18856581	MDGA2	1.35e-47
cg13281139	SLIT2	1.37e-47
cg05209584	SLC27A6	1.46e-47
cg13974761	LCE2A	1.46e-47
cg14854901	RP11-79P5.9;BTF3	1.55e-47
cg18489034	MTRNR2L8	1.59e-47
cg12250496	LPHN3	1.6e-47
cg02331902	LUCAT1;RP11-213H15.4	1.67e-47
cg10824810	CTD-3032H12.2	1.78e-47
cg22954449	CTD-2297D10.2;ADAMTS16	1.94e-47
cg18115507	NALCN	2.1e-47
cg03734437	GDF6	2.13e-47
cg17334018	UNC5C;RP11-710C12.1	2.4e-47
cg25181651	PXDN	2.47e-47
cg05910415	IGFL1	2.5e-47
cg10384725	AP000438.4	2.68e-47
cg26749518	KLK8	2.71e-47
cg26449787	EYA4	2.74e-47
cg11229543	PRDM16	2.75e-47
cg12060422	RP11-108L7.15;KAZALD1	3.1e-47
cg16269431	GLRB	3.15e-47
cg25482786	CHL1	3.18e-47
cg24685006	RP4-728D4.2	3.3e-47
cg16508480	CTD-2297D10.2;ADAMTS16	3.42e-47
cg13596497	COL4A1	3.43e-47
cg26122980	AMPH	4.1e-47
cg11657808	RYR2	4.48e-47
cg13755795	SALL1	4.64e-47
cg03976877	VIPR2	4.73e-47
cg02012703	CTC-525D6.1;VSTM2B	6e-47
cg20207108	GPRASP1	6.28e-47
cg17228900	IRF4	6.96e-47
cg22821324	GPM6A	7.76e-47
cg03031609	SFMBT2;RP5-1031D4.3	8.25e-47
cg18816826	MT1HL1	8.42e-47
cg05791136	COL25A1;AC004051.2	9.06e-47
cg21853021	SLC22A18	9.33e-47
cg08439930	SALL1	9.67e-47
cg25922610	OCM	9.94e-47
cg03202077	ADAMTS5	1.03e-46
cg18375860	RYR2	1.04e-46
cg10293925	AMPH	1.08e-46
cg21785034	TRBJ2-1;TRBJ2-2;TRBJ2-2P;TRBJ2-3;TRBJ2-4;TRBJ2-5;TRBJ2-6;TRBJ2-7	1.09e-46
cg23148701	DPY19L2	1.17e-46
cg05133853	HBBP1	1.2e-46
cg14900031	AC093323.1	1.29e-46
cg22643811	FAM19A5	1.32e-46
cg02149189	OR2I1P	1.37e-46
cg15361590	PCDHGC4	1.45e-46
cg04377145	KCNQ5	1.53e-46
cg24645214	RP11-1070A24.2	1.67e-46
cg14443519	HCG4	1.71e-46
cg11201710	FGF12-AS2	1.72e-46
cg02866454	SFMBT2;RP5-1031D4.3	1.76e-46
cg13408605	SIRPG	1.78e-46
cg00674706	OR2I1P	2.06e-46
cg24936695	CLDN17	2.12e-46
cg15814717	OR2I1P	2.16e-46
cg11315153	KHDRBS2	2.18e-46
cg07926691	AMPH	2.25e-46
cg21908235	RNVU1-8	2.29e-46
cg01423964	KCNA3	2.34e-46
cg17487029	LINC01519	2.43e-46
cg07136998	SLIT3	2.79e-46
cg26013553	KCNA3	3e-46
cg18025409	RP5-892F13.2	3.52e-46
cg00576550	HTR3D	3.75e-46
cg26437009	AC140912.1	3.98e-46
cg18134312	KHDRBS2	4.07e-46
cg22305167	OR2I1P	4.09e-46
cg26530758	ANK1	4.46e-46
cg03714619	Six3os1_2;Six3os1_3	4.77e-46
cg16749093	SIPA1	5.75e-46
cg10774877	NALCN	5.83e-46
cg02604524	EFCC1	5.93e-46
cg01784614	CARD6	6.09e-46
cg09926747	COL25A1;AC004051.2	6.42e-46
cg18131141	RP4-728D4.2	6.56e-46
cg12538674	HOXA-AS2	7.16e-46
cg09351315	CBX8	7.23e-46
cg03584891	GUCY1B3	7.4e-46
cg08620154	RP11-664D7.4	7.81e-46
cg15409013	CTD-2297D10.2;ADAMTS16	7.87e-46
cg02700891	TRH	8.03e-46
cg06055873	HOXA2	8.39e-46
cg04020079	CNRIP1	9.04e-46
cg08779649	RP11-432M24.4	9.41e-46
cg25593309	AC021218.2	9.54e-46
cg14872657	AC005537.2	9.69e-46
cg11800608	C20orf85	1.13e-45
cg07135629	AQP1	1.28e-45
cg17045801	AC005537.2	1.4e-45
cg02348449	ZSCAN18	1.45e-45
cg03940684	CHL1-AS2	1.51e-45
cg09688546	GLRB	1.68e-45
cg11194545	NRK	1.7e-45
cg24112562	SIM2	1.88e-45
cg25626375	OC90	1.96e-45
cg22199216	RP3-462D8.2	2.04e-45
cg23774016	OR10J3	2.2e-45
cg18550003	FUT1;FGF21	2.27e-45
cg14018648	ASGR1	2.4e-45
cg00310215	SALL1	2.48e-45
cg20148575	GNAQP1	2.86e-45
cg12821278	BRINP1	3.34e-45
cg03574723	GPR26	3.67e-45
cg16907558	FIGLA	3.68e-45
cg04991805	CRTAC1	3.73e-45
cg12973591	AC002076.10	3.9e-45
cg05312104	NAV2-IT1	4.01e-45
cg10078511	THBS1	4.09e-45
cg00127167	CTD-2297D10.2;ADAMTS16	4.27e-45
cg15593510	OR10T2	4.31e-45
cg08361126	ITGA8	4.74e-45
cg14012294	RP11-79P5.9;BTF3	4.92e-45
cg23363202	ANKRD20A8P	6.02e-45
cg11036833	CDO1	6.13e-45
cg26530498	C1QL2	6.15e-45
cg00355281	NPY	6.29e-45
cg00939495	DRD5	6.62e-45
cg08553437	TMEM155	7e-45
cg27534912	CD1C	7.18e-45
cg22650617	FIGLA	7.34e-45
cg01362243	Six3os1_2	7.52e-45
cg02065637	MIR124-3	8.41e-45
cg02671880	LINC00391	8.59e-45
cg01674009	AC005757.7	9.02e-45
cg19772066	CTC-512J12.4;ZNF229	9.08e-45
cg26267038	CNKSR2	9.43e-45
cg25652029	ITGA4	9.82e-45
cg17551002	OR6Y1	9.84e-45
cg15929698	NPY	1.1e-44
cg15871127	COL4A1	1.13e-44
cg07168939	JRK	1.15e-44
cg14269191	OR51B2;OR51B2	1.18e-44
cg18827954	STK32B	1.29e-44
cg04804539	MAL	1.34e-44
cg21517947	SFRP1	1.38e-44
cg00772407	RP11-823E8.3	1.45e-44
cg25260137	RP11-32K4.1	1.59e-44
cg13064062	HIST4H4	1.66e-44
cg26978668	SFMBT2;RP5-1031D4.3	1.68e-44
cg21646598	ADAMTS5	1.72e-44
cg12394201	ALKBH3-AS1;RP11-613D13.4	1.72e-44
cg05006349	KAZN	1.78e-44
cg09892262	KRTAP24-1	1.99e-44
cg19505136	CHL1-AS2	2e-44
cg25941151	TYR	2.1e-44
cg14625113	CNTN1	2.12e-44
cg18044383	CDH20	2.15e-44
cg03133868	NKX2-2-AS1	2.16e-44
cg18686527	RPL23A	2.29e-44
cg17418463	DLGAP3	2.36e-44
cg15147833	OR1C1	2.38e-44
cg03402459	OR2I1P	2.46e-44
cg10526659	ITGA4	2.51e-44
cg13265789	UNC5C;RP11-710C12.1	2.59e-44
cg11167100	TM6SF1	2.61e-44
cg17816908	SFRP1	2.62e-44
cg08247376	SPATA32	2.65e-44
cg04711998	ITIH5	2.72e-44
cg06806958	KIAA1217	2.75e-44
cg04923174	OR10X1;OR10X1	2.89e-44
cg19539667	SPATA32	2.94e-44
cg04761746	SCOC	3.08e-44
cg07642043	GRIN2A	3.33e-44
cg27603283	MMD2	3.37e-44
cg26728517	MAFB	3.4e-44
cg06010588	UNC5D	3.47e-44
cg24000437	LCE3E	3.51e-44
cg07033372	SLC32A1	3.55e-44
cg25503381	THBS1	3.75e-44
cg26059468	SOX17	3.81e-44
cg20814718	UNC5D	4.23e-44
cg15056794	RP11-166D19.1;BLID	4.36e-44
cg09016243	GLUD2	4.45e-44
cg23180938	CDO1	4.62e-44
cg07846220	LAMA1	4.75e-44
cg11641611	EFCC1	4.81e-44
cg26043322	OR10J5	4.91e-44
cg09854626	SOX8	4.98e-44
cg14370314	EFS	4.99e-44
cg03394150	GSG1L	5.08e-44
cg10922935	NPTX1	5.18e-44
cg19846667	TRAV3	7.97e-44
cg13269555	RP11-108L7.15;KAZALD1	8.11e-44
cg11371231	OR8K5	8.26e-44
cg09907936	ZNF135	8.36e-44
cg09492451	CTD-3032H12.2	8.63e-44
cg17371081	NELL1	8.9e-44
cg09573515	RP11-44L9.1	9.47e-44
cg16120788	SYNDIG1	9.95e-44
cg14233354	CRTAC1	1.01e-43
cg20113732	NELL1	1.07e-43
cg07816687	RP11-5A19.5;HSF4	1.14e-43
cg01573635	TEKT5	1.22e-43
cg03111498	VSX1	1.22e-43
cg18777119	CTC-525D6.1;CTC-525D6.2;VSTM2B	1.3e-43
cg02131862	KRTAP24-1	1.33e-43
cg22748799	ZNF135	1.37e-43
cg26452868	PCDH15	1.48e-43
cg27477373	ZSCAN5A;AC006116.21;ZNF542P	1.71e-43
cg26309134	ZSCAN5A;AC006116.21;ZNF542P	1.96e-43
cg17032564	RP11-175K6.2	2.29e-43
cg00177451	SALL1	2.58e-43
cg20673829	VIPR2	2.6e-43
cg25189564	VIPR2	2.78e-43
cg23325963	Six3os1_2	2.85e-43
cg21834061	OR2I1P	3.21e-43
cg11164441	RP11-1191J2.5	3.43e-43
cg11004890	RP4-794I6.4	3.68e-43
cg26492446	BHLHE23	3.75e-43
cg23891360	TMEM132D	3.79e-43
cg18277754	ALK	3.84e-43
cg23987444	SLC18A3	4.07e-43
cg15708153	ZSCAN5A;AC006116.21;ZNF542P	4.45e-43
cg09508275	OR8H3	4.87e-43
cg27331524	WNT2	5.01e-43
cg11172693	PPP1R16B	5.08e-43
cg02842227	NCAM2	5.09e-43
cg11097433	SORCS1	5.51e-43
cg07914084	RYR2	5.65e-43
cg08448589	C8orf34	5.66e-43
cg19025113	RP11-89K21.2	5.66e-43
cg06616729	RP11-53M11.5	5.67e-43
cg21631754	EXOC3L2	5.75e-43
cg15272362	VSX1	5.78e-43
cg09556043	FREM3	6.2e-43
cg20792256	OR7A17	6.35e-43
cg10237419	COL25A1;AC004051.2	7.03e-43
cg23111830	SOX21;SOX21-AS1	7.26e-43
cg15699267	MIR124-3	7.26e-43
cg23650423	RP11-748H22.1	7.33e-43
cg05213609	SALL1	7.6e-43
cg23509896	ZNF512B;TCEA2	7.9e-43
cg19039028	COL25A1;AC004051.2	8.05e-43
cg13463054	ST6GALNAC5	8.71e-43
cg05206884	SYN3	8.98e-43
cg08190291	ADAMTS5	9.53e-43
cg16115720	CD34	9.57e-43
cg18787401	ZSCAN5A;AC006116.21;ZNF542P	9.58e-43
cg21527708	CHIAP2	9.87e-43
cg14768785	GHSR	1.08e-42
cg25104105	KAZN	1.14e-42
cg22762215	OR2I1P	1.2e-42
cg20772593	ACTBL2;AC025470.1	1.22e-42
cg09907509	SERTM1	1.22e-42
cg13962321	HIST2H2BB;RP5-998N21.7	1.24e-42
cg02264079	RP11-196G11.2	1.28e-42
cg04225046	GPRASP1	1.41e-42
cg23797411	SORCS3	1.48e-42
cg05305434	LSP1	1.49e-42
cg26468007	MMD2	1.52e-42
cg05293738	PREX2	1.66e-42
cg11008243	KCNQ5	1.69e-42
cg24676071	ADCY1	1.87e-42
cg22512438	TRH	1.92e-42
cg01796223	CPA4	1.97e-42
cg08516516	CDO1	2.01e-42
cg09871315	HOXA2	2.02e-42
cg03146949	ZSCAN5A;AC006116.21;ZNF542P	2.19e-42
cg05534710	IRX1	2.28e-42
cg14844130	VPREB1	2.34e-42
cg06419761	NPFFR1	2.56e-42
cg00596763	AC009014.3	2.58e-42
cg07495363	BOLL	2.79e-42
cg02892153	DLGAP1-AS1	2.93e-42
cg01151966	NRG3	2.98e-42
cg14673618	SIX3-AS1	3.15e-42
cg10436333	FLJ16779	3.2e-42
cg12652174	TRBJ2-2P;TRBJ2-3;TRBJ2-4;TRBJ2-5;TRBJ2-6;TRBJ2-7	3.28e-42
cg01956420	COL4A1	3.38e-42
cg16348385	RP11-455F5.3	3.61e-42
cg14249876	AEBP1	3.67e-42
cg03651054	RP11-432M24.4	3.74e-42
cg06632762	GSTM1	4.08e-42
cg00043788	VSX1	4.16e-42
cg18858331	RN7SL68P;AC008781.1	4.17e-42
cg15722679	SIRPG	4.24e-42
cg05491001	LPHN3	4.32e-42
cg00112465	EFCC1	4.34e-42
cg15313459	CNRIP1	4.37e-42
cg19651132	KCNA1	4.43e-42
cg05305046	CARD6	4.67e-42
cg27480913	OR52L1	5.23e-42
cg00733780	GAD2	5.64e-42
cg22476960	OR8G5	6.29e-42
cg25944717	TRIM41	6.76e-42
cg14140379	AC093323.1	6.77e-42
cg13267264	PRDM14	6.78e-42
cg05218882	NPHP3-AS1	6.97e-42
cg13688123	RP11-439A17.10;HIST2H2BA;RP11-439A17.4	7.85e-42
cg03102729	GLUD2	8.01e-42
cg00933411	DLC1	8.23e-42
cg14127859	BARX1-AS1	8.23e-42
cg21109744	CCDC37-AS1;CCDC37	8.59e-42
cg06724588	SALL1	9.17e-42
cg04874562	OR51I1	9.45e-42
cg17477445	DPY19L2	9.6e-42
cg08748948	SCARF2	1.12e-41
cg14497172	HIST2H2BB;RP5-998N21.7	1.15e-41
cg00123055	SOX17	1.16e-41
cg00208153	PCDH17	1.18e-41
cg08430009	GSC2	1.22e-41
cg08039116	HECW1	1.25e-41
cg17934871	SERTM1	1.28e-41
cg09229912	CUX2	1.29e-41
cg18770739	OR10P1	1.34e-41
cg09410234	KCNA3	1.36e-41
cg24553547	MIR1180	1.4e-41
cg10262052	RP11-44K6.2	1.47e-41
cg06542022	AC008060.7	1.5e-41
cg25499543	THBS1	1.52e-41
cg24229750	UBQLN3	1.52e-41
cg14944647	MIR129-2	1.56e-41
cg26878816	RP5-1031D4.3	1.59e-41
cg16818993	SFMBT2;RP5-1031D4.3	1.59e-41
cg04012857	TRIM31	1.65e-41
cg13641185	OR2I1P	1.74e-41
cg04514249	FREM3;RP13-578N3.3	1.75e-41
cg14062050	IRX4;CTD-2194D22.4	1.78e-41
cg05951221	ECEL1P1	1.81e-41
cg03430846	NRG1	1.82e-41
cg01464835	VSTM2B	1.83e-41
cg07382920	TP73	1.84e-41
cg07808555	KCNA3	1.84e-41
cg05446629	B3GAT1	1.84e-41
cg17060964	OR5AS1	2.05e-41
cg12071328	NELL1	2.08e-41
cg09905605	RP11-196G11.2	2.12e-41
cg25825488	ITGA8	2.16e-41
cg15302379	RP11-108L7.15;KAZALD1	2.24e-41
cg03640756	PCDHGC4	2.24e-41
cg10675276	EYA4	2.3e-41
cg20311002	CYCSP5	2.4e-41
cg26071016	KCNA3	2.45e-41
cg10390058	GALR1	2.46e-41
cg20449590	RNVU1-8	2.48e-41
cg06207052	PPP1R16B	2.49e-41
cg10214421	AC008060.7	2.63e-41
cg10074544	COL25A1;AC004051.2	2.71e-41
cg08452658	TM6SF1	2.77e-41
cg07502439	SALL1	2.8e-41
cg17460447	EVC2;EVC	2.88e-41
cg27516568	TMEM155	2.88e-41
cg02510802	SUN5	2.89e-41
cg24621437	SORCS1	3.04e-41
cg01847754	TMEM257	3.26e-41
cg06624156	USP4	3.59e-41
cg06738786	RP5-1027G4.3	3.59e-41
cg26362197	GRWD1	3.89e-41
cg21009400	RP11-395E19.3;RP11-395E19.2;RP11-395E19.4	3.91e-41
cg21210758	EVC2;EVC	3.92e-41
cg19620758	MMP13	3.98e-41
cg16757984	NR1D1	4e-41
cg26742995	SPATA32	4.1e-41
cg02165355	RP11-281O15.8;ZNF454	4.16e-41
cg04992638	SPATA32	4.31e-41
cg21845080	TM4SF19-TCTEX1D2;TM4SF19	4.4e-41
cg09008705	NGF	4.71e-41
cg14054990	KRTAP19-5	4.75e-41
cg02510267	NELL1	5.01e-41
cg20676475	LCE3D	5.41e-41
cg18462653	DEFB119	5.92e-41
cg16966815	ST6GALNAC5	6.01e-41
cg04965987	RIPPLY3	6.68e-41
cg15298173	RP11-300A12.2;TUBBP8	6.76e-41
cg17486097	UNC5D	7.13e-41
cg06469345	DRD5	7.38e-41
cg14060496	BHLHE23	7.4e-41
cg25993718	CBLN4	7.53e-41
cg07172334	KRTAP24-1	7.87e-41
cg12880658	CDO1	7.87e-41
cg19678968	RP11-716D16.1	8.41e-41
cg00534479	MIR218-2	8.47e-41
cg17747005	PREX2	8.69e-41
cg04151220	TRIM31	8.76e-41
cg04353438	SAFB	9.08e-41
cg27546237	COL4A1	9.09e-41
cg21632158	OR2I1P	9.28e-41
cg07053841	OR2W1	9.33e-41
cg06429617	ZNF625-ZNF20;ZNF625	1.01e-40
cg01495122	SFRP1	1.02e-40
cg03227184	TMEM155	1.1e-40
cg00501272	HCG4	1.21e-40
cg05520409	SOX8	1.23e-40
cg15015397	KRTAP4-9	1.39e-40
cg00055557	DOK5	1.46e-40
cg02078943	AC008060.7	1.47e-40
cg24469464	MSX1	1.5e-40
cg22266749	COL25A1;AC004051.2	1.66e-40
cg18430128	ZNF135	1.69e-40
cg12122146	TMEM132D	1.69e-40
cg19764418	RYR2	1.8e-40
cg21414251	OR12D2;OR12D2	1.82e-40
cg08032924	CMTM2	2.02e-40
cg09279949	THBD	2.08e-40
cg17541528	COL4A1	2.3e-40
cg20634967	PCDH17	2.42e-40
cg18206027	VWC2	2.53e-40
cg18857759	OR2L8;OR2L8	2.56e-40
cg06393354	OR2M3	2.61e-40
cg08737296	MIR124-3	2.65e-40
cg15927720	SLIT3	2.7e-40
cg10196720	PCDH10	2.7e-40
cg23774356	GSC2	2.73e-40
cg07234958	RP11-632L2.2	2.8e-40
cg23849826	THBS1	2.8e-40
cg12074585	CLSTN3	2.8e-40
cg07167168	PTPRT;RP1-269M15.3	2.82e-40
cg15016120	DCD	2.91e-40
cg26872137	UNC5D	2.97e-40
cg20415809	ITGA4	2.97e-40
cg11019462	PRDM15	2.99e-40
cg17938612	MSX1	3.02e-40
cg09839170	C5orf66-AS1	3.06e-40
cg12038696	RP4-728D4.2	3.16e-40
cg21672843	PTPRT;RP1-269M15.3	3.16e-40
cg02861926	NLRP11	3.16e-40
cg12079322	GALNT13	3.2e-40
cg12456681	DPY19L2P4	3.34e-40
cg19803052	TMEM196	3.5e-40
cg20528583	FGF5	3.56e-40
cg19562321	SLC36A2	3.64e-40
cg17438849	HECW1	3.76e-40
cg12145907	PCDHGC4	3.91e-40
cg10670396	GPRASP1	4e-40
cg19304150	SYT6	4.42e-40
cg13772815	MEIS3P2	4.49e-40
cg04652097	MAGI2	4.55e-40
cg11297236	PDILT	4.56e-40
cg01009664	TRH	4.68e-40
cg08641579	MAGI2	4.96e-40
cg09926260	MIR515-1;MIR519E	4.96e-40
cg05331340	ASGR1	5.07e-40
cg24403845	SORCS1	5.08e-40
cg14285788	SFT2D3	5.35e-40
cg21187554	ANKRD18A;FAM201A	5.41e-40
cg01060471	NOLC1	5.43e-40
cg04748834	CHL1-AS2	5.53e-40
cg22665383	OR4C16;OR4C16	5.92e-40
cg24542751	SPATA32	5.99e-40
cg23302570	NXPH2	6.02e-40
cg09167553	LRRC7	6.1e-40
cg07205823	5S_rRNA	6.15e-40
cg05937969	CASR	6.36e-40
cg00423453	OR51B6	6.41e-40
cg26360953	RP11-242F24.1	6.45e-40
cg16226642	OR5P3	6.45e-40
cg25341923	KRTAP4-7	6.55e-40
cg24319902	SFRP1	6.7e-40
cg22266967	AC093323.1	6.75e-40
cg04956382	MYOT	6.86e-40
cg05037622	JPH2	7.04e-40
cg05773207	GAP43	7.09e-40
cg15700197	OR10J1	7.62e-40
cg07219542	GSTM2	7.66e-40
cg15642759	NPFFR1	7.67e-40
cg19156875	MAPT-AS1	7.87e-40
cg20522046	INTS6-AS1	8.03e-40
cg07903677	KCNA3	8.34e-40
cg07921384	SPEG	8.35e-40
cg18952647	BNC1	8.87e-40
cg14520424	LRRC7	9.16e-40
cg00241002	RP13-16H11.7	9.33e-40
cg03063639	TM6SF1	9.33e-40
cg24924779	KCNG1	9.4e-40
cg24366702	ZNF132;CTD-2619J13.19	9.45e-40
cg24242823	NPY	9.73e-40
cg14470895	CDO1	9.76e-40
cg03921753	GSG1L	9.77e-40
cg19820372	LAYN	1e-39
cg15259986	FIGN	1.01e-39
cg23887396	CTB-96E2.10	1.05e-39
cg27062795	ZSCAN5A;AC006116.21;ZNF542P	1.05e-39
cg06846214	OR2T6	1.05e-39
cg23509098	SUN3	1.05e-39
cg12891177	PCBP1	1.06e-39
cg11732619	SLIT3	1.08e-39
cg15007156	KAZN	1.12e-39
cg02792792	CDO1	1.16e-39
cg04555373	NRG1	1.16e-39
cg06790305	KRTAP19-8	1.16e-39
cg24959938	ADNP2	1.18e-39
cg18897632	AC010729.1	1.2e-39
cg14197923	FGF5	1.21e-39
cg12501546	CACNA1A	1.23e-39
cg10406295	SFRP1	1.33e-39
cg25346915	FOLH1	1.34e-39
cg08433504	THBS1	1.35e-39
cg01627847	SPATA32	1.36e-39
cg22620221	DPP6	1.46e-39
cg12528713	FGF5	1.48e-39
cg24021956	MAGI2	1.48e-39
cg17830985	SHISA2	1.66e-39
cg11214140	SOX17	1.74e-39
cg01496199	IFNL4P1	1.76e-39
cg08567279	LECT1	2.12e-39
cg25228126	FZD2	2.36e-39
cg13497563	HCG4	2.47e-39
cg22799321	AC002076.10	2.5e-39
cg14323984	AC093323.1;S100P	2.56e-39
cg10268345	MIR1225;RP11-304L19.1	2.58e-39
cg10379890	IRF4	2.61e-39
cg21971621	SNX32	2.71e-39
cg15186181	SOX17	2.81e-39
cg14542503	TBX22	3.1e-39
cg14696396	TM6SF1	3.21e-39
cg01630690	NKX2-1	3.22e-39
cg11295724	RP4-576H24.2	3.56e-39
cg03938558	CACNA1E	3.66e-39
cg05630016	IGLON5	3.82e-39
cg20686234	CTB-96E2.10	3.85e-39
cg01939477	MIR129-2	3.98e-39
cg05940231	TBX15	4.07e-39
cg09022422	SLC6A11	4.15e-39
cg04598517	SLC6A3	4.2e-39
cg21656751	AC005537.2	4.2e-39
cg19944763	ITGA8	4.25e-39
cg16431978	KRTAP13-2;KRTAP13-3	4.39e-39
cg02631468	VSX1	4.43e-39
cg21782409	UNC5C	4.54e-39
cg09542111	GRIK1	4.66e-39
cg00926400	BOLL	4.91e-39
cg05350411	RP11-1263C18.1	4.91e-39
cg24842760	EYA4	5.05e-39
cg07950000	GRIK1	5.05e-39
cg15556502	MIR129-2	5.05e-39
cg26069745	HOXA2	5.09e-39
cg17859110	PTPRT;RP1-269M15.3	5.09e-39
cg11513637	CCNA1	5.1e-39
cg27442308	SOX21;SOX21-AS1	5.24e-39
cg15552491	NLRX1	5.4e-39
cg00589850	RN7SL68P;AC008781.1	5.43e-39
cg24454144	SLC32A1	5.58e-39
cg21703322	LAYN	5.87e-39
cg06798106	RP11-53M11.5	6.13e-39
cg07977614	RP11-561I11.4	6.23e-39
cg07523833	RP11-927P21.4;MIR6080	6.24e-39
cg16790794	NKX2-1-AS1	6.35e-39
cg05667379	DPP10-AS1	6.55e-39
cg07803218	PARD6B	6.76e-39
cg23073467	RNU6-1041P;MIR516A2;CTC-339O9.1;AC011453.2	7.26e-39
cg26429925	BNC1	7.65e-39
cg23919924	OR10G8	8.04e-39
cg08640634	NR2E1	8.45e-39
cg25210451	LINC00472	8.58e-39
cg08194313	GFRA1	8.58e-39
cg18032812	RP13-580B18.1	8.62e-39
cg08217024	MDGA2	9.07e-39
cg02641539	DCSTAMP	9.19e-39
cg11016563	RP11-748H22.1	9.35e-39
cg06440348	RP11-377G16.2	9.59e-39
cg24978630	PCDH15	9.82e-39
cg03048083	SPATA32	9.94e-39
cg01072952	CTD-2269F5.1	1.01e-38
cg03008707	RP11-710C12.1	1.03e-38
cg00891278	CCDC37-AS1;CCDC37	1.04e-38
cg05051043	SLC35F3	1.08e-38
cg08413157	PTPRT;RP1-269M15.3	1.09e-38
cg11492102	RP3-428L16.1	1.11e-38
cg23913995	NKX2-2-AS1	1.12e-38
cg20486825	SLITRK4	1.12e-38
cg18886444	USP4	1.15e-38
cg18128969	NCAM2	1.17e-38
cg24368383	MMP23B	1.2e-38
cg16361253	GPR111	1.2e-38
cg26296488	DRD5	1.24e-38
cg19206040	GRIK3	1.26e-38
cg26365534	AC099754.1;LRRC3B	1.32e-38
cg16185834	VSX1	1.33e-38
cg02745636	SALRNA1	1.37e-38
cg24818939	GPRASP1	1.38e-38
cg24928391	SOX17	1.4e-38
cg11229862	CCDC37-AS1;CCDC37	1.48e-38
cg16732787	DUSP5P1	1.49e-38
cg03929977	KCNA1	1.5e-38
cg08768395	RNU6-923P	1.51e-38
cg02217159	KHDRBS2	1.52e-38
cg12417685	FAM19A4	1.58e-38
cg11901272	HCG4	1.58e-38
cg16255697	MIR1911	1.61e-38
cg04882394	MMP23B	1.66e-38
cg09022943	MIR2682	1.69e-38
cg13890706	GFRA1	1.73e-38
cg01883662	TM4SF19-TCTEX1D2;TM4SF19	1.75e-38
cg15579650	GPRASP1	1.83e-38
cg02646528	LRRC55	1.85e-38
cg15325875	TLX1NB	1.85e-38
cg16741041	SPG20-AS1	1.87e-38
cg24868359	GRIK1	1.94e-38
cg10566121	RP5-1024C24.1	1.95e-38
cg02980079	VSTM4	2e-38
cg02463418	EPHA5-AS1	2.21e-38
cg19461644	RP11-92C4.6	2.21e-38
cg18115215	RP11-469L4.1;TMEM108	2.27e-38
cg12238015	PDX1-AS1	2.29e-38
cg14523847	DPP6	2.67e-38
cg03120289	LPPR5	2.78e-38
cg22405653	KRTAP21-1	2.79e-38
cg23849169	HCG4	2.8e-38
cg04226536	LAYN	2.83e-38
cg10824063	NELL1	2.87e-38
cg26943822	SLITRK4	2.97e-38
cg07237979	LSP1	3.07e-38
cg14029856	OR5AR1;OR5AR1	3.08e-38
cg15984718	UNC5C;RP11-710C12.1	3.11e-38
cg20506550	RP5-1031D4.3	3.12e-38
cg23004160	CTD-2561J22.5	3.13e-38
cg06083483	CCL8	3.3e-38
cg04458776	SLC22A6	3.3e-38
cg18755783	SPG20-AS1	3.42e-38
cg04921315	RP11-462G12.1	3.42e-38
cg14302224	RP11-225H22.4	3.43e-38
cg07639900	KLF6	3.61e-38
cg07139762	ZNF334	3.62e-38
cg04117435	NALCN	3.7e-38
cg19144684	THSD7B	3.79e-38
cg09936218	TRGV11	3.84e-38
cg13980808	RP11-662I13.2	3.84e-38
cg24685755	ZNF677	3.84e-38
cg06659727	COL4A1	3.99e-38
cg06550340	BHLHE23	4.06e-38
cg10671668	RP11-234B24.4	4.31e-38
cg19535096	TMPRSS11D	4.37e-38
cg17480254	PRR32	4.39e-38
cg12250896	RP11-140A10.3	4.49e-38
cg09591286	ZNF804B	4.64e-38
cg03950614	NR2E1	4.75e-38
cg21532325	WDR86	5.22e-38
cg20944283	ACKR1	5.4e-38
cg16258223	C5orf66-AS1	5.42e-38
cg12087412	FGF5	5.56e-38
cg26728422	AL031721.1	5.57e-38
cg17901584	DHCR24;RP11-67L3.4	5.62e-38
cg09426834	AC116614.1;SNTG2	5.67e-38
cg08996579	SLC18A3	5.73e-38
cg15092343	MSX1	5.8e-38
cg01078989	ITGA8	6.02e-38
cg14893163	PCDH17	6.38e-38
cg17495719	FREM3	6.65e-38
cg13103143	RP11-547D24.1	6.78e-38
cg03225787	OR6Y1	6.93e-38
cg12210736	COL25A1;AC004051.2	7.39e-38
cg04077662	ST6GALNAC5	7.62e-38
cg19939997	GDF6	8.73e-38
cg00070680	DGKI	8.79e-38
cg13136220	RP11-1134I14.4;RP11-1134I14.8	8.79e-38
cg09998133	TRBJ2-2;TRBJ2-2P;TRBJ2-3;TRBJ2-4;TRBJ2-5;TRBJ2-6;TRBJ2-7	8.83e-38
cg09016242	SALL1	9.5e-38
cg07733567	MIR1180	9.64e-38
cg12091642	SALRNA1	9.73e-38
cg02745211	RP11-469L4.1;TMEM108	1.03e-37
cg05384102	SNAP91	1.03e-37
cg02383130	AMPH	1.03e-37
cg11178863	RP4-597A16.2	1.03e-37
cg05700339	CIDEA	1.04e-37
cg16657244	NOLC1	1.04e-37
cg05121790	TNFRSF8	1.05e-37
cg07369569	HMGCLL1	1.06e-37
cg24198558	RP11-469L4.1;TMEM108	1.09e-37
cg16638540	ZNF135	1.1e-37
cg07700514	DKFZP434H168	1.1e-37
cg06750832	KCNA3	1.11e-37
cg09985615	RP11-319E12.1	1.11e-37
cg04660422	MSX1	1.16e-37
cg02660347	DPY19L2	1.18e-37
cg03494634	OR7G3	1.19e-37
cg17338208	TFPI2;AC002076.10	1.23e-37
cg25284213	MIR206	1.29e-37
cg05137263	NR0B1	1.3e-37
cg26727693	RP11-715H19.2	1.3e-37
cg14501219	RP11-927P21.4;MIR6080	1.36e-37
cg05646686	NPAS3	1.36e-37
cg01687040	DCD	1.4e-37
cg25798792	EPHA5-AS1	1.51e-37
cg12588890	AC002456.2	1.63e-37
cg20506715	EFCC1	1.69e-37
cg13996405	SPG20-AS1	1.8e-37
cg20392607	KCNA1	1.82e-37
cg26664161	FBXL21	1.84e-37
cg02523844	MAGI2	1.88e-37
cg24925163	SFT2D3	1.88e-37
cg04672706	SOX17	1.92e-37
cg01563031	NELL1	1.95e-37
cg17297305	IVNS1ABP;GS1-279B7.2	2.02e-37
cg05304729	MNDA	2.16e-37
cg26460092	TM6SF1	2.2e-37
cg07532354	SCGB1D1	2.22e-37
cg20981848	RP4-742J24.2	2.35e-37
cg05164933	SFRP2	2.31e-37
cg17354303	BARX1-AS1	2.33e-37
cg04891086	KCNA1	2.35e-37
cg24221648	RP11-52L5.6	2.35e-37
cg01703205	TRBV27	2.44e-37
cg14924620	FAM170B	2.45e-37
cg02936451	LPHN3	2.87e-37
cg09056181	GAD2	2.93e-37
cg09303936	KCNQ5	2.94e-37
cg24556441	SYN3	3.01e-37
cg08392199	LIFR-AS1	3.03e-37
cg17386213	OSTM1	3.14e-37
cg21161253	BHLHE23	3.16e-37
cg04304705	FAM19A5	3.27e-37
cg20806180	MGAT3	3.28e-37
cg11389172	SLC18A3	3.3e-37
cg06672560	CBLN4	3.37e-37
cg11410023	EPHA6	3.67e-37
cg18623672	LPPR5;RP5-896L10.1	3.73e-37
cg24239329	DCLK1	3.88e-37
cg13839457	LINC00900	4.01e-37
cg09107912	FNDC1	4.06e-37
cg06968788	SDC4P	4.15e-37
cg02081266	TBX4	4.18e-37
cg07303244	OPRK1	4.23e-37
cg04292718	CD34	4.31e-37
cg08328483	AC135050.1	4.4e-37
cg09009536	EPHA5-AS1	4.59e-37
cg07696099	HPYR1	4.65e-37
cg06695663	GSC2	4.82e-37
cg01681098	SENCR	4.83e-37
cg12219082	FAM19A4	5.09e-37
cg08463758	EMILIN3	5.13e-37
cg10392572	RP11-466L17.1	5.22e-37
cg16697940	LDOC1	5.25e-37
cg13248778	RNA5SP242;RNA5SP243	5.34e-37
cg06523224	BNC1	5.86e-37
cg15839448	SFRP1	5.92e-37
cg10380289	HIST2H2BB;RP5-998N21.7	6.07e-37
cg16787600	SORCS3	6.11e-37
cg12584684	UNC5C	6.26e-37
cg10527010	SLC6A11	6.36e-37
cg07681935	HAND2	6.6e-37
cg01273384	MIR1257	6.58e-37
cg04034767	GRASP	6.71e-37
cg07224726	AQPEP	6.8e-37
cg09868336	FAM19A4	6.96e-37
cg04888113	HIST2H2BF	7.02e-37
cg21816330	RPL23A	7.1e-37
cg26095658	FIGLA	7.18e-37
cg25437385	SLC35F3	7.22e-37
cg09936426	RP4-597A16.2	7.3e-37
cg06304097	TCERG1L	7.67e-37
cg26777883	ERICH1	7.72e-37
cg10899681	RP11-175K6.2	7.74e-37
cg19846622	MSX1	7.93e-37
cg18587340	EMILIN3	7.99e-37
cg07882671	CTD-2194D22.3	8.14e-37
cg12587766	LIFR-AS1	8.41e-37
cg16875863	GRWD1	8.75e-37
cg10703826	TBX15	8.87e-37
cg13882278	KIAA1217	9.03e-37
cg06639332	SERTM1	9.78e-37
cg14011368	TUNAR	9.99e-37
cg19949955	NPAS3	1.01e-36
cg10216615	SLC32A1	1.02e-36
cg06580419	VWC2L	1.02e-36
cg23359394	DOK5	1.06e-36
cg19832521	NOVA1-AS1	1.1e-36
cg03100024	ZNF574	1.13e-36
cg13438893	RP11-52L5.6	1.18e-36
cg19030607	FAM19A5	1.18e-36
cg15042811	FREM3	1.21e-36
cg08311610	PDE8B	1.21e-36
cg22758454	NEK4P2	1.24e-36
cg08227353	RP11-108L7.15;KAZALD1	1.25e-36
cg06777194	SOX8	1.26e-36
cg01764020	TRPC4	1.29e-36
cg01283246	FBXL21	1.31e-36
cg15408073	RXFP3	1.31e-36
cg24496475	NKX1-1	1.32e-36
cg16642284	RP11-288A5.2;FOXI2	1.33e-36
cg10362591	SLC6A2	1.35e-36
cg27189087	RAX	1.36e-36
cg18011916	TBX20	1.44e-36
cg11950860	KPRP	1.44e-36
cg23261919	RP13-49I15.6	1.47e-36
cg26917140	BARHL2	1.47e-36
cg19365673	LPPR5	1.54e-36
cg15113922	ZNF790-AS1	1.58e-36
cg23847712	DRD5	1.68e-36
cg15396204	RP11-233E12.2	1.71e-36
cg15034345	AC010729.1	1.76e-36
cg22280038	MAGI2	1.77e-36
cg02564259	LCAT	1.82e-36
cg23348723	PPP1R17	1.83e-36
cg02816816	FAM184B	1.83e-36
cg05022059	ERICH1	1.87e-36
cg26501369	EYA4	1.92e-36
cg00868383	ZNF132;CTD-2619J13.19	2.05e-36
cg06288251	RP11-469L4.1;TMEM108	2.09e-36
cg08000065	UNC5D	2.13e-36
cg15484375	SAA1;RNA5SP334	2.18e-36
cg17153122	FOXQ1	2.24e-36
cg03770410	ZNF831	2.34e-36
cg05099508	SPAG6	2.36e-36
cg14658804	SLIT3	2.4e-36
cg02174225	JAM3	2.4e-36
cg25777540	GPRASP1	2.41e-36
cg21455438	CD34	2.47e-36
cg18969232	RP11-89K21.2	2.49e-36
cg08215532	DPY19L2P4	2.52e-36
cg06595154	MRVI1	2.67e-36
cg01258201	CPNE5	2.71e-36
cg18451814	OTX2;OTX2-AS1	2.71e-36
cg12417071	CCNA1	2.89e-36
cg06543087	VAV3	2.89e-36
cg12882697	SLC6A3	2.94e-36
cg01247127	RP4-576H24.2	2.95e-36
cg03156893	PRKCB	2.97e-36
cg16886987	RIPPLY3	2.98e-36
cg05343159	NPS	3.01e-36
cg25778535	RIC3;RP11-379P15.1	3.09e-36
cg00547077	ZNF132;CTD-2619J13.19	3.15e-36
cg20924470	FBXL21	3.2e-36
cg21926708	PDZRN4	3.26e-36
cg25614094	OPRK1	3.42e-36
cg13011388	EFS	3.43e-36
cg05588496	RP11-17E3.1;DOK6	3.45e-36
cg10919344	OR5A1	3.51e-36
cg25535587	DYDC1	3.6e-36
cg18790597	FAM184B	3.75e-36
cg00863099	LINC00152	3.9e-36
cg10772290	PTGIS	3.91e-36
cg14874750	COL26A1	4.04e-36
cg15087147	LRRC4	4.05e-36
cg15692052	HTR2A	4.05e-36
cg12070159	RP11-1070A24.2	4.14e-36
cg05452406	GCM2;RP11-637O19.2	4.26e-36
cg02353184	SFMBT2	4.4e-36
cg26199241	TBX4	4.4e-36
cg01565438	SLFN13	4.43e-36
cg13507224	OR10J3	4.5e-36
cg02473540	ZNF135	4.5e-36
cg06564900	FIGN	4.52e-36
cg16418810	EVC2;EVC	4.52e-36
cg09614415	RP11-288A5.2;FOXI2	4.84e-36
cg02530437	RPL23A	4.98e-36
cg23295754	SIRPG	5.01e-36
cg08776356	SALL1	5.05e-36
cg13298841	HECW1	5.16e-36
cg22960952	C4orf26	5.2e-36
cg16002818	BOLL	5.28e-36
cg23644960	RP11-748H22.1	5.28e-36
cg16409955	TRPC4	5.3e-36
cg12412079	FAM19A4	5.34e-36
cg14387505	AHSP	5.41e-36
cg15100100	ST6GALNAC5	5.5e-36
cg16041090	LINC00445	5.5e-36
cg24109980	SLC18A3	5.7e-36
cg21983491	RP4-806M20.4;MIR296;MIR298	5.77e-36
cg16697214	IKZF1	5.77e-36
cg06201642	ST6GALNAC5	5.88e-36
cg24031355	SPAG6	5.89e-36
cg20670075	LHX5-AS1	5.92e-36
cg13985518	HOXA2	5.92e-36
cg22166883	LYPLA2	5.98e-36
cg20465661	OR2T6	6.11e-36
cg24115221	ZNF625-ZNF20;ZNF625	6.14e-36
cg22658979	MMP13	6.16e-36
cg11125104	ANKRD30BL;MIR663B	6.19e-36
cg11957331	MEGF8	6.22e-36
cg17741689	AJAP1	6.31e-36
cg08393041	ZIC1	6.46e-36
cg20506184	SFMBT2;RP5-1031D4.3	6.5e-36
cg18412834	FLJ16779	6.8e-36
cg03630821	CTD-2619J13.5	6.94e-36
cg18844382	EFS	7.01e-36
cg19156483	FIGN	7.16e-36
cg13557668	FBXL21	7.88e-36
cg05659741	RP11-439A17.10;HIST2H2BA;RP11-439A17.4	7.99e-36
cg19267861	MIR124-3	8.61e-36
cg25546901	ZNF790-AS1	8.9e-36
cg13652336	PREX2	9.16e-36
cg03209854	CTD-2297D10.2;ADAMTS16	9.32e-36
cg07073391	ITGA8	9.38e-36
cg25539045	RP11-288A5.2;FOXI2	9.47e-36
cg07878486	ZNF132;CTD-2619J13.19	9.79e-36
cg10569606	KCNA1	9.82e-36
cg23596233	B3GAT1	9.83e-36
cg05921905	HOXA2	9.87e-36
cg11769163	THBD	1.01e-35
cg05031521	SOX8	1.02e-35
cg25084878	SLC27A6	1.02e-35
cg00578220	KHDRBS2	1.02e-35
cg08428452	SLIT2	1.04e-35
cg24084681	TFPI2;AC002076.10	1.06e-35
cg17030173	RP11-19O2.2	1.06e-35
cg07239716	RP11-823E8.3	1.07e-35
cg27112809	KRT16P2	1.11e-35
cg13207326	MSX1	1.11e-35
cg13641690	LINGO1	1.11e-35
cg22242216	GRWD1	1.13e-35
cg27639662	RP11-377G16.2	1.14e-35
cg12328333	DCLK1	1.16e-35
cg13434352	GABBR2	1.17e-35
cg09200738	DNM1P50;ULK4P2	1.19e-35
cg23684973	ADARB2	1.19e-35
cg21296676	EYA4	1.2e-35
cg05976714	FLT4	1.21e-35
cg06744574	BEND5	1.22e-35
cg23211240	BTG4;MIR34B;MIR34C;C11orf88	1.23e-35
cg25958561	PAK3	1.28e-35
cg04154276	KIAA1217	1.33e-35
cg19400238	ANP32C	1.34e-35
cg02650317	MIR124-3	1.38e-35
cg21158633	UNCX	1.39e-35
cg20380768	RP11-2E11.5;MEST;MESTIT1_1	1.48e-35
cg09904358	RP11-183E9.2	1.5e-35
cg06812991	NPY2R	1.56e-35
cg02589353	OR8Q1P	1.61e-35
cg12395205	CIDEA	1.61e-35
cg00729133	C7orf62	1.64e-35
cg16098981	SYNDIG1	1.67e-35
cg02487331	RNVU1-8	1.73e-35
cg25870731	LDOC1	1.83e-35
cg13655303	PCK1	1.88e-35
cg07929406	SOX3	1.9e-35
cg26983710	GALNT13	1.92e-35
cg00262621	MMP23B	1.93e-35
cg15271054	RP11-358D14.2	1.94e-35
cg05544500	RP11-434E6.4	1.96e-35
cg14733048	RSPO2	1.98e-35
cg03087912	RP11-53M11.5	2.04e-35
cg04927004	MIR124-3	2.19e-35
cg11682071	STK32B	2.28e-35
cg07204280	CIDEA	2.36e-35
cg14283968	CRISPLD1	2.38e-35
cg25045746	AC092675.4	2.46e-35
cg22634891	UNC5C;RP11-710C12.1	2.47e-35
cg07609788	EMILIN3	2.49e-35
cg00097645	OR7D4	2.65e-35
cg27385032	ZNF334	2.7e-35
cg07682600	FLT4	2.7e-35
cg12935979	POU4F2;AC093887.1	2.71e-35
cg18277764	CHL1-AS2	2.73e-35
cg25291138	RP5-1031D4.3	2.75e-35
cg15930041	AC004699.1	2.83e-35
cg06653699	SALL1	2.93e-35
cg00947032	SPG20-AS1	2.95e-35
cg17222164	SPATA32	2.98e-35
cg05572621	KRTAP6-2;KRTAP22-1	2.99e-35
cg16711792	AP000251.3	3e-35
cg23403072	CSAG1	3.12e-35
cg15498563	TRIM77	3.23e-35
cg25500050	RP11-69M1.4	3.24e-35
cg16072777	Y_RNA	3.26e-35
cg08441806	NKX6-2	3.47e-35
cg05994094	CCDC178	3.77e-35
cg02225720	CTD-3195I5.3	3.85e-35
cg23741006	TCN1	3.85e-35
cg08313939	SLC32A1	3.86e-35
cg23501406	DRD4	3.92e-35
cg14056357	CTC-512J12.4;ZNF229	3.93e-35
cg05316043	NRG3	4.01e-35
cg01108118	IRF4	4.04e-35
cg13193455	RP5-884C9.2	4.22e-35
cg08939095	BNC1	4.28e-35
cg18671950	RP11-227D13.1	4.33e-35
cg27341926	GFRA1	4.39e-35
cg14492800	GDNF;GDNF-AS1	4.43e-35
cg11089595	RALYL	4.45e-35
cg03329976	SOX17	4.45e-35
cg08628911	RP11-616M22.11	4.5e-35
cg13455704	CCDC169-SOHLH2;CCDC169	4.5e-35
cg09017434	RP11-19O2.2	4.56e-35
cg19050990	MIR2682;MIR137	4.72e-35
cg10514097	AC009108.2	4.83e-35
cg14657834	TCF24	5.05e-35
cg09799658	TWIST1	5.52e-35
cg12072964	LAMA1	5.6e-35
cg02825728	CLDN17	5.63e-35
cg12940822	SLC27A6	5.64e-35
cg06298530	SNORD115-36;SNORD115-37	5.76e-35
cg15167956	CCDC169-SOHLH2;CCDC169	5.81e-35
cg23479922	RP11-19O2.2	6.02e-35
cg05404010	SALL1	6.02e-35
cg03361102	Six3os1_2;Six3os1_3	6.03e-35
cg27423760	SALL1	6.22e-35
cg27191906	OR2J2	6.22e-35
cg23030069	IGF2-AS	6.4e-35
cg17112426	DMKN	6.53e-35
cg19751300	RP11-742D12.2	6.68e-35
cg13482308	RP11-297B17.3	6.82e-35
cg02800810	ADAMTS5	7.35e-35
cg26295057	GDNF;GDNF-AS1	7.37e-35
cg26500539	MAGEA8	7.5e-35
cg01495831	OR5H15	7.51e-35
cg11070069	LINC00577	7.58e-35
cg00467420	ADARB2	7.98e-35
cg20581321	AC092675.4	8.05e-35
cg07363855	PRDM16	8.27e-35
cg16435571	SLC6A11	8.3e-35
cg22418909	SFRP1	8.37e-35
cg07014174	KRTAP11-1	8.58e-35
cg10796805	ARPP21	8.61e-35
cg23121993	CTD-2194D22.3	8.68e-35
cg24870497	RP11-710C12.1	9.11e-35
cg01577992	DPY19L2P2	9.34e-35
cg03442378	ALX4	9.62e-35
cg14055212	LHFPL3-AS1	9.78e-35
cg25451456	OR56A3	1.02e-34
cg01527459	DYDC1	1.02e-34
cg22879515	BTG4;MIR34B;MIR34C;C11orf88	1.03e-34
cg14184817	EXOC3L2	1.05e-34
cg00621646	OR10S1	1.06e-34
cg27528510	COL26A1	1.06e-34
cg25012919	DCLK1	1.09e-34
cg25574024	IGF2-AS	1.11e-34
cg05193067	LL0XNC01-105G4.3	1.17e-34
cg20253468	CTD-2291D10.3	1.18e-34
cg03517998	FAM183B	1.2e-34
cg05297854	TRABD	1.2e-34
cg22436429	RP4-728D4.2	1.27e-34
cg01525538	DUSP5P1	1.3e-34
cg24437737	HIST2H2BB;RP5-998N21.10;RP5-998N21.7;HIST2H3PS2	1.31e-34
cg07041214	OR56A3	1.32e-34
cg11725972	RP5-912I13.1	1.32e-34
cg26132774	RP11-52L5.6	1.33e-34
cg15760257	CTB-96E2.10	1.33e-34
cg16677448	DMKN	1.33e-34
cg25943503	DCLK1	1.35e-34
cg02558026	MIR762	1.36e-34
cg00891995	SPRR2C	1.4e-34
cg21090033	TM4SF19-TCTEX1D2;TM4SF19	1.41e-34
cg01656244	MIR124-2HG	1.41e-34
cg07498275	SALL1	1.46e-34
cg01052879	MIR124-3	1.48e-34
cg07153665	CMTM2	1.5e-34
cg05616355	PANX3	1.5e-34
cg24535439	MMP23B	1.57e-34
cg07013734	RP11-748H22.1	1.61e-34
cg12180703	SLC32A1	1.63e-34
cg24011405	LOC440461	1.68e-34
cg23986671	ADAMTS5	1.77e-34
cg11435943	SERPINB12	1.77e-34
cg06495961	DPP6	1.8e-34
cg10300684	FOXG1-AS1	1.8e-34
cg10539069	TFPI2;AC002076.10	1.83e-34
cg01815671	CCDC37-AS1;CCDC37	1.85e-34
cg04711162	CTC-525D6.1;CTC-525D6.2;VSTM2B	1.86e-34
cg01416891	RP11-348J12.2;CYP26C1	1.86e-34
cg14778311	RP11-632L2.2	1.94e-34
cg22319311	TSPYL5	1.94e-34
cg04261192	NELL1	1.98e-34
cg16488065	LRRN2	2.08e-34
cg11154559	RP11-403I13.5	2.09e-34
cg12606396	PCDH17	2.1e-34
cg16898239	SRP68;GALR2	2.12e-34
cg15469350	SLIT2	2.26e-34
cg09297468	HTR1E	2.26e-34
cg21207403	OR2L3	2.29e-34
cg02593932	GALNT13	2.3e-34
cg01212887	SOX21;SOX21-AS1	2.3e-34
cg19628148	CCDC37-AS1;CCDC37	2.32e-34
cg02979457	HOXA2	2.33e-34
cg10968815	BPIFB2	2.36e-34
cg11649713	AMMECR1	2.4e-34
cg01054478	RP11-451H23.2	2.41e-34
cg19868631	VSTM2A	2.44e-34
cg13142700	SLC6A1	2.62e-34
cg00112493	COL25A1	2.66e-34
cg13711394	CCNA1	2.66e-34
cg10767336	KCNA1	2.71e-34
cg23141855	TFPI2;AC002076.10	2.76e-34
cg17310258	PAUPAR	2.77e-34
cg25496678	VAX1	2.8e-34
cg09581611	LCAT	2.8e-34
cg08575537	EPO	2.84e-34
cg00864530	LINC00517	2.89e-34
cg03045635	DRD5	2.91e-34
cg03121419	DCAF12L1	2.93e-34
cg17332379	RP11-927P21.4;MIR6080	2.96e-34
cg03419885	PKNOX2-AS1	3e-34
cg15045441	LINC00472	3.03e-34
cg07452217	CTD-3032H12.2	3.27e-34
cg18686498	NALCN	3.22e-34
cg18560204	BNC1	3.24e-34
cg18672939	GFRA1	3.26e-34
cg19909349	LAMA1	3.28e-34
cg23989768	UBE2DNL	3.31e-34
cg00625334	CCDC178	3.39e-34
cg00581482	ATP8B2	3.44e-34
cg23116540	THBS1	3.47e-34
cg06995920	DPY19L2	3.5e-34
cg15157455	HIST2H2BB;RP5-998N21.10;RP5-998N21.7;HIST2H3PS2	3.52e-34
cg00167275	GLUD1	3.55e-34
cg05533037	KRTAP7-1	3.56e-34
cg05546863	CMTM2	3.59e-34
cg26104297	ITGA8	3.64e-34
cg07839533	HTR1A	3.64e-34
cg18789663	PLD5	3.7e-34
cg11114757	BIRC2	3.78e-34
cg23686014	TFPI2;AC002076.10	3.85e-34
cg06433023	OSTM1	3.89e-34
cg01622304	PDX1-AS1	4.02e-34
cg06769202	HOXA2	4.06e-34
cg27032232	DPP6	4.08e-34
cg08806408	SALL1	4.26e-34
cg00613562	SULF1	4.27e-34
cg04597433	DRD5	4.35e-34
cg10140114	ZNF334	4.35e-34
cg23399286	OC90	4.44e-34
cg13125488	RP11-166D19.1;BLID	4.46e-34
cg25384000	OR5D16	4.46e-34
cg07547000	GALNT13	4.52e-34
cg00444390	OR10A6;OR10A6	4.66e-34
cg03944843	SRSF10	5e-34
cg10111816	RP11-21M24.2	5.18e-34
cg18705279	RP11-5A19.5;HSF4	5.2e-34
cg09030672	RP11-5A19.5;HSF4	5.2e-34
cg08190044	ATP8B2	5.29e-34
cg27029821	PRDM14	5.29e-34
cg03958979	NR2E1	5.32e-34
cg18557131	ZIC5	5.53e-34
cg09169764	RP11-3B12.3	6e-34
cg07978472	TMEM155	6.03e-34
cg13634602	RP11-849I19.1;SALL3	6.11e-34
cg02108033	FAM184B	6.12e-34
cg01277542	SLC6A2	6.36e-34
cg12754421	GRIA4	6.49e-34
cg12628075	OR14J1	6.57e-34
cg09680007	S100A3	6.82e-34
cg26522894	TMEM132D	6.97e-34
cg06181518	EYA4	7.14e-34
cg24543552	KHDC1L	7.22e-34
cg21512644	RP11-92A5.2;NPY2R	7.23e-34
cg17273588	AFF3	7.28e-34
cg21727276	TP53TG5	7.29e-34
cg15482872	SOX21;SOX21-AS1	7.35e-34
cg10294822	LPHN3	7.37e-34
cg20450979	GPM6A	7.55e-34
cg00468228	CRH	7.68e-34
cg10959198	RGMA	7.78e-34
cg06266613	RP11-19E11.1	7.91e-34
cg15649801	TFPI2;AC002076.10	7.92e-34
cg27393162	RP11-154H17.1	8.05e-34
cg07963234	CRMP1	8.13e-34
cg24589459	BOLL	8.17e-34
cg18213472	SNAP91	8.44e-34
cg02899206	ADARB2	8.69e-34
cg12767281	SFMBT2;RP5-1031D4.3	8.78e-34
cg21306006	PDE10A;LINC00473	8.97e-34
cg18692149	CTD-2561J22.5	9.01e-34
cg17277892	FRMD4B	9.15e-34
cg13564742	FOXE1	9.2e-34
cg08990926	CNTN1	9.33e-34
cg11213574	TRABD	9.38e-34
cg09561125	NRCAM	9.47e-34
cg18290624	SLC6A11	9.57e-34
cg21077559	TMEM155	9.68e-34
cg06487082	ZNF532	1e-33
cg23695133	LINC00237	1e-33
cg19901801	SYT6	1.01e-33
cg00651523	ZSCAN23	1.03e-33
cg05039475	ARPP21	1.03e-33
cg01645753	CPEB1-AS1	1.04e-33
cg00160262	OR6P1	1.05e-33
cg19391527	PNOC	1.06e-33
cg11124364	TMEM196	1.13e-33
cg03646889	LPPR4	1.13e-33
cg14594362	GRWD1	1.13e-33
cg22784954	CTD-2297D10.2;ADAMTS16	1.14e-33
cg09574499	HOXA-AS3	1.15e-33
cg16491617	OPRK1	1.17e-33
cg14327531	GATA3-AS1;RP11-379F12.3	1.2e-33
cg12426234	NCAM2	1.2e-33
cg05276469	NEK4P2	1.22e-33
cg03871460	CCNA1	1.27e-33
cg18156135	DPY19L2P1	1.28e-33
cg20038038	AC245036.1	1.33e-33
cg26024843	COL5A1	1.36e-33
cg17840858	RP11-927P21.4;MIR6080	1.4e-33
cg13777681	DPP10-AS1	1.42e-33
cg24310500	CPNE5	1.43e-33
cg04457196	FIGN	1.45e-33
cg16719466	PDE1C	1.47e-33
cg01994307	RP11-371M22.1	1.47e-33
cg20404387	FAM43B	1.48e-33
cg20820063	CCDC178	1.55e-33
cg15042473	H2BFM	1.55e-33
cg07903918	GABBR2	1.57e-33
cg07167423	RP4-728D4.2	1.68e-33
cg22371591	MSX1	1.76e-33
cg16572375	SHISA2	1.75e-33
cg18597643	PCDH15	1.76e-33
cg26523005	ZNF662	1.77e-33
cg00955035	ECEL1P2	1.81e-33
cg18719750	SDC2	1.86e-33
cg13912115	RXFP3	1.9e-33
cg09463233	SUSD5	1.91e-33
cg17124224	BNC1	1.93e-33
cg25188398	RP11-452N4.1	1.97e-33
cg03622666	RP11-189E14.4	1.98e-33
cg10949007	GLRX	1.99e-33
cg01683883	CMTM2	1.99e-33
cg20675505	MSC	1.99e-33
cg04455164	DPY19L2	1.99e-33
cg25307168	SLC32A1	2.07e-33
cg27486637	WDR17	2.08e-33
cg09681877	RP11-371M22.1	2.09e-33
cg23050442	GAD2	2.13e-33
cg02881570	NGB	2.19e-33
cg09112156	LDOC1	2.2e-33
cg23760300	RP11-521M14.2	2.2e-33
cg18809706	OR10AC1	2.23e-33
cg03287574	IRX4;CTD-2194D22.4	2.28e-33
cg11206634	SFT2D3	2.28e-33
cg15710198	SOX17	2.35e-33
cg09896900	CTC-512J12.4;ZNF229	2.38e-33
cg00984146	EGFLAM	2.41e-33
cg22300282	LINC00472	2.45e-33
cg16626067	CMTM2	2.46e-33
cg25355213	MIR4738;UNK	2.5e-33
cg11068946	NKX6-2	2.51e-33
cg27149471	OR5T1	2.54e-33
cg03202526	SOX3	2.55e-33
cg03815358	SNAP91	2.6e-33
cg25664438	SDC2	2.65e-33
cg11267802	SPRR2G	2.77e-33
cg03609427	SUN3	2.78e-33
cg00665029	FBXO25	2.83e-33
cg01612158	FCRL4	2.92e-33
cg02853850	AC134300.1	2.98e-33
cg20785459	HBBP1	2.99e-33
cg26810908	ZP4	3.03e-33
cg20690420	OSTM1	3.08e-33
cg13921352	FAM19A4	3.09e-33
cg24319381	CPEB1-AS1	3.18e-33
cg09090724	RP11-469L4.1;TMEM108	3.28e-33
cg08726248	DRD4	3.44e-33
cg17357062	FCN1	3.45e-33
cg26987597	MIR6720	3.45e-33
cg07790615	RYR2	3.51e-33
cg16265906	CDO1	3.52e-33
cg18237607	GDNF;GDNF-AS1	3.55e-33
cg13423140	AVPR2	3.58e-33
cg17694795	TCF24	3.6e-33
cg07428782	AA06;RP11-31I22.4	3.6e-33
cg24114899	FOXD2-AS1;FOXD2	3.69e-33
cg18313340	LINC00404;LINC00403	3.92e-33
cg26532627	SPATA32	3.99e-33
cg18451114	RP5-884C9.2	3.99e-33
cg01558877	C22orf42	4.06e-33
cg01105058	NALCN	4.25e-33
cg02459415	OR5L2	4.26e-33
cg26111757	BPIFB3	4.36e-33
cg16697438	NPFFR1	4.38e-33
cg00469856	FIGLA	4.39e-33
cg16365424	RP5-855F14.2	4.59e-33
cg27637521	RP11-806H10.4	4.65e-33
cg12072560	CIDEA	4.83e-33
cg20631014	SNAP91	4.86e-33
cg23570923	HTRA3	4.87e-33
cg05860313	DLGAP3	4.88e-33
cg20870512	UNCX	4.9e-33
cg17671005	RP11-371M22.1	4.93e-33
cg02423618	SPATA8	4.98e-33
cg03361633	RP11-23E10.5	5.14e-33
cg00518386	GRIN2A	5.19e-33
cg25081106	MIR4500HG;SLITRK5	5.2e-33
cg24487076	KIAA1217	5.21e-33
cg24296626	AMER2	5.22e-33
cg03576469	CCDC8	5.23e-33
cg01464104	OR5T1	5.35e-33
cg10031614	FGF5	5.37e-33
cg04245645	TUNAR	5.57e-33
cg20611276	EYA4	5.63e-33
cg22457238	ZNF135	5.75e-33
cg21114773	CIDEA	5.83e-33
cg09487611	KCNA1	5.91e-33
cg23831517	RPL10AP3	5.93e-33
cg00471000	BPIFB6	6.14e-33
cg02184008	ALX4	6.15e-33
cg25032336	PCDH10	6.18e-33
cg20872937	GALR1	6.23e-33
cg03843000	TBX5	6.28e-33
cg20266715	CAPN2	6.31e-33
cg05915293	AC005606.14	6.55e-33
cg21255438	PRDM14	6.57e-33
cg21241410	AC016735.2	6.86e-33
cg09191036	DRD5	7.01e-33
cg00109356	SHISA2	7.03e-33
cg17177660	VEGFC	7.06e-33
cg23081534	LRRIQ4	7.12e-33
cg20615879	TLX1NB	7.16e-33
cg02243386	XIRP1	7.14e-33
cg00405688	FOXI2	7.16e-33
cg25201811	NALCN	7.22e-33
cg22851295	GCM2;RP11-637O19.2	7.23e-33
cg12386297	MIR205	7.26e-33
cg25598840	HOXA2	7.55e-33
cg21966764	OR52B2	7.56e-33
cg04812556	MIR5691	7.6e-33
cg01993907	RP11-1137G4.4	7.61e-33
cg14994060	C5orf66-AS1	7.88e-33
cg17923358	RELN	8.24e-33
cg16908824	AC011453.1;MIR1283-2	8.3e-33
cg07983905	RN7SL555P	8.3e-33
cg02812891	ECEL1P2	8.56e-33
cg08686879	CSF2	8.77e-33
cg01337391	RP11-434E6.4	8.8e-33
cg27359629	RPS6P8	8.85e-33
cg13808083	BARX1-AS1	8.94e-33
cg08636083	HIST2H2BF;HIST2H3D	8.94e-33
cg13096260	SDC2	8.98e-33
cg00384539	PRDM14	9.03e-33
cg19618297	LINC00403	9.13e-33
cg14354327	EBF3	9.21e-33
cg22745143	MIR1265	9.24e-33
cg12072611	TRAV12-3	9.34e-33
cg01278387	PHACTR3	9.4e-33
cg24617723	ZSWIM2	9.61e-33
cg02336334	MIR518A2	9.61e-33
cg02915422	PRRG3	9.65e-33
cg23619399	RP11-52L5.6	9.81e-33
cg00875960	ZNF625-ZNF20;ZNF625	9.83e-33
cg10784386	TRMT112P2	1e-32
cg14876077	EXOC3L2	1e-32
cg06482428	KCNIP4;RP11-17E2.2	1.02e-32
cg06525347	EYA4	1.06e-32
cg02459604	ZNF829;ZNF568	1.07e-32
cg26144458	SIM2	1.08e-32
cg00157796	FNDC1	1.08e-32
cg00512171	LINC00577	1.09e-32
cg24531255	TFPI2;AC002076.10	1.09e-32
cg18347642	KCNIP4;RP11-17E2.2	1.14e-32
cg24101492	TUNAR	1.17e-32
cg03068446	TRIM49D1;TRIM49D2	1.2e-32
cg16783744	DPYS	1.23e-32
cg21761844	ZNF829;ZNF568	1.32e-32
cg06498267	HCN1	1.33e-32
cg07274618	SRP68;GALR2	1.33e-32
cg25827490	MSC	1.34e-32
cg03857640	RP11-46D6.4	1.35e-32
cg19792266	ZDHHC15	1.35e-32
cg17839237	TWIST1	1.38e-32
cg20691205	SPG20-AS1	1.38e-32
cg19727439	GRIK3	1.43e-32
cg13566610	RELN	1.43e-32
cg13182713	MIR4738;UNK	1.44e-32
cg17767285	SNAP91	1.47e-32
cg18329931	FCHO1	1.49e-32
cg15861585	DRD4	1.52e-32
cg27393126	ERICH3	1.52e-32
cg23710218	MSC	1.53e-32
cg16656895	EMX2OS	1.55e-32
cg03217253	ZNF677	1.57e-32
cg00246932	DKFZP434H168	1.62e-32
cg14999001	RAMP3	1.69e-32
cg11940285	TRH	1.7e-32
cg27563985	CBLN4	1.7e-32
cg17015994	CYP11B1	1.71e-32
cg12639574	ABL2	1.72e-32
cg24963147	AC009014.3	1.75e-32
cg00386408	TGFBI	1.8e-32
cg20104776	LDOC1	1.8e-32
cg20555682	LMO1	1.8e-32
cg24221541	PNMAL1	1.82e-32
cg10396546	ZSWIM2	1.82e-32
cg17067638	SNORD115-10	1.86e-32
cg05893614	FAM19A4	1.87e-32
cg09208611	AVPR1A;RP11-715H19.2	1.92e-32
cg03168749	OR8B12	1.93e-32
cg11924517	IL17A	1.98e-32
cg08271804	ZNF492	2.03e-32
cg25602684	GDNF;GDNF-AS1	2.03e-32
cg05996052	AARD	2.03e-32
cg19086570	CDV3P1	2.1e-32
cg12296772	MTMR7	2.13e-32
cg12613383	PLD5	2.18e-32
cg25042430	KIAA1217	2.2e-32
cg13012115	OR8B2	2.21e-32
cg06490988	GATA2	2.21e-32
cg04574507	CD1B	2.22e-32
cg12907644	SAA2-SAA4;SAA2;RNA5SP333	2.31e-32
cg14377593	TFPI2;AC002076.10	2.31e-32
cg07462756	MSX1	2.33e-32
cg14062468	SYN3	2.39e-32
cg08886973	LINC00473	2.43e-32
cg04283307	OR2M5	2.44e-32
cg12185873	IGHD2-21;AL122127.25	2.45e-32
cg24145481	KRTAP25-1	2.45e-32
cg01907051	RP11-13P5.2	2.46e-32
cg06944472	RP11-989E6.1	2.56e-32
cg09798801	TERF1P3	2.59e-32
cg15428578	RP11-489D6.2;RYR3	2.59e-32
cg19554569	OR51B5	2.63e-32
cg22836229	EFCAB1	2.69e-32
cg10906284	AVPR1A;RP11-715H19.2	2.7e-32
cg15397374	EFCAB1	2.8e-32
cg26789779	GDNF;GDNF-AS1	2.97e-32
cg26076412	RP5-1031D4.3	2.99e-32
cg04410024	CRISPLD1	3.01e-32
cg18335068	ZNF677	3.02e-32
cg09520393	DRD5	3.07e-32
cg10303842	CDH12	3.13e-32
cg06557057	TRBJ2-2;TRBJ2-2P;TRBJ2-3;TRBJ2-4;TRBJ2-5;TRBJ2-6;TRBJ2-7	3.14e-32
cg10008757	GATA3-AS1;RP11-379F12.3	3.2e-32
cg19478298	RELN	3.2e-32
cg12908522	KCNA1	3.21e-32
cg15104644	TRIM67	3.22e-32
cg00765828	TMEM132D	3.25e-32
cg15448975	CRMP1	3.27e-32
cg16707405	CDO1	3.41e-32
cg05907046	ZSWIM2	3.53e-32
cg26364205	EPHA6	3.55e-32
cg18710462	NR2E1	3.58e-32
cg04184836	CPEB1-AS1	3.59e-32
cg01127423	CTD-2210P24.1	3.64e-32
cg18157275	OR5M10	3.73e-32
cg27100436	DPY19L2P2	3.77e-32
cg26808293	THOC6	3.79e-32
cg02622052	CNTN1	3.88e-32
cg10440696	OR52N1	3.88e-32
cg18404308	CNGA3;AC092675.4	3.93e-32
cg14776201	AC010729.1	4.03e-32
cg19870512	RP11-234B24.4	4.06e-32
cg16182986	MARCH11;RP11-19O2.2	4.09e-32
cg12534759	OR4A15	4.11e-32
cg27111250	RP11-377G16.2	4.25e-32
cg06002197	CENPN	4.31e-32
cg10038009	PYDC1	4.31e-32
cg27076487	LDOC1	4.35e-32
cg07744841	SLC6A11	4.36e-32
cg13219190	SNORD115-14	4.4e-32
cg15811371	MUC16	4.45e-32
cg08383315	RIC3;RP11-379P15.1	4.47e-32
cg14343214	EYA4	4.49e-32
cg02484774	C19orf67	4.5e-32
cg20072171	PTPRG-AS1	4.5e-32
cg10038618	TP73	4.5e-32
cg00858400	SLC7A5	4.53e-32
cg09063683	AC008869.2	4.6e-32
cg00480389	CBLN4	4.6e-32
cg14752336	SORCS3	4.61e-32
cg10572274	EID3	4.63e-32
cg24381587	OR6N1	4.63e-32
cg15690511	OR4C12	4.68e-32
cg01618245	RP11-261N11.8	4.93e-32
cg26739865	TFPI2;AC002076.10	4.95e-32
cg08095852	WDR17	4.96e-32
cg16009633	PREX2	5.13e-32
cg08621611	GRIN2A	5.14e-32
cg25733599	MIR205HG	5.19e-32
cg07837260	SLC24A2	5.35e-32
cg01824969	TCF24	5.41e-32
cg06679347	VEGFC	5.41e-32
cg06602847	BRINP1	5.41e-32
cg10022722	AC005606.14	5.45e-32
cg03168582	DMRT1	5.5e-32
cg24575234	CHRM2	5.58e-32
cg13405783	OPRK1	5.64e-32
cg10583000	AC092675.4	5.71e-32
cg26328335	AQP5	5.75e-32
cg01748263	ATP13A5	5.76e-32
cg26456435	RP11-196G11.2	5.81e-32
cg24342283	RP11-158I9.5	5.83e-32
cg03387135	MIR124-3	5.87e-32
cg23341612	HKDC1	5.87e-32
cg09171112	TENM2	5.95e-32
cg19437258	CCDC169-SOHLH2;CCDC169	6.11e-32
cg06060191	LPPR4	6.17e-32
cg07462292	ALX4	6.23e-32
cg14750277	RP11-656G20.1	6.26e-32
cg17294725	UNCX	6.27e-32
cg08492619	MIR4500HG;SLITRK5	6.33e-32
cg16150752	RP11-19O2.2	6.31e-32
cg05827732	EPHA6	6.75e-32
cg01520122	CCL7	6.78e-32
cg02523640	FOXI2	6.84e-32
cg25670061	RP1-301L19.1	6.86e-32
cg02932321	DEFA6	6.91e-32
cg13566919	GZMA	6.93e-32
cg10363246	KCNA1	6.97e-32
cg18369913	OR4C46	7.01e-32
cg24312105	RP4-799P18.2	7.02e-32
cg03926815	IQSEC1	7.08e-32
cg02181639	NGB	7.08e-32
cg07609862	MTNR1B	7.08e-32
cg25528298	RP3-428L16.1	7.11e-32
cg06615940	GSTM2	7.16e-32
cg08276328	MAGEC1	7.43e-32
cg23004758	PCDH17	7.53e-32
cg13816428	OR5AU1	7.67e-32
cg07219425	RP11-889L3.1	7.71e-32
cg14385245	BNC1	7.74e-32
cg08965276	SOX8	7.85e-32
cg09432154	GPR87	8e-32
cg00876196	KIR2DL4	8.06e-32
cg07945323	KRTAP6-2;KRTAP22-1	8.11e-32
cg06267144	RP1-137H15.2;ZIC3	8.44e-32
cg04063945	KIAA1217	8.71e-32
cg03099431	SHISA2	8.75e-32
cg22428147	DGKI	8.77e-32
cg17740822	RP11-823E8.3	8.95e-32
cg17561030	RP11-79P5.9;BTF3	9e-32
cg02730156	SIM2	9.09e-32
cg05552220	GDF6	9.35e-32
cg18594551	KRTAP23-1	9.62e-32
cg11932205	NME8	9.71e-32
cg00529958	ZIC5	9.97e-32
cg02489377	OR1B1;OR1B1	1.03e-31
cg05658487	IRX4;CTD-2194D22.4	1.03e-31
cg04081402	PES1	1.03e-31
cg25345102	BPIFB6	1.04e-31
cg23898073	GFRA1	1.04e-31
cg05809668	AC009531.2	1.04e-31
cg20984085	ZNF582;ZNF582-AS1	1.04e-31
cg24876960	CTD-2194D22.3	1.06e-31
cg00917018	LDOC1	1.06e-31
cg25731359	TP73	1.07e-31
cg20174636	SPEG	1.07e-31
cg11328303	GAD2	1.08e-31
cg10006428	OR2T27	1.08e-31
cg07696699	FAM184B	1.1e-31
cg09227138	SNAP91	1.1e-31
cg01325409	SLC24A5	1.11e-31
cg12406559	ZNF532	1.12e-31
cg19430967	RP11-469L4.1	1.12e-31
cg04917181	TSPYL5	1.14e-31
cg18009496	CTD-2194D22.3	1.14e-31
cg12087643	GFRA1	1.15e-31
cg18565795	ENKUR	1.16e-31
cg12229082	ATG9B	1.16e-31
cg17712694	RP11-19O2.2	1.18e-31
cg03659519	GALR1	1.18e-31
cg09884423	EID3	1.19e-31
cg14148862	RP11-664D7.4	1.24e-31
cg07594636	CNRIP1	1.29e-31
cg00358442	DPY19L2P4	1.3e-31
cg22488256	PDE4B	1.32e-31
cg03957481	KLHDC7B	1.36e-31
cg25249068	BFSP2	1.41e-31
cg21051580	MMD2	1.46e-31
cg23694248	PTPRR	1.46e-31
cg10324640	CDK3	1.47e-31
cg16727201	CIDEA	1.49e-31
cg02588107	CR1	1.51e-31
cg21013866	EFS	1.52e-31
cg04545136	SUSD5	1.54e-31
cg07589773	IKZF1	1.62e-31
cg26913669	COL11A1	1.65e-31
cg25119415	MNDA	1.65e-31
cg12346967	KRTAP8-1	1.69e-31
cg25775322	SFRP2	1.7e-31
cg20959325	RP5-1024C24.1	1.72e-31
cg23926793	KHDRBS2	1.74e-31
cg03878133	FIGN	1.74e-31
cg03340466	FAM163A	1.74e-31
cg07430472	PCDH17	1.76e-31
cg01673994	MMP16	1.77e-31
cg26115633	RP11-288A5.2;FOXI2	1.8e-31
cg01427575	SYT3	1.8e-31
cg05157140	UNCX	1.81e-31
cg00689835	G6PC2	1.88e-31
cg03333330	TFPI2;AC002076.10	1.89e-31
cg11484353	RP3-450M14.1	2.01e-31
cg17104151	C1QC	2.03e-31
cg07281879	WT1-AS_6;WT1-AS_7	2.04e-31
cg21340845	LRP1B	2.05e-31
cg11321433	PDE1C	2.09e-31
cg09820729	MFN2	2.12e-31
cg22517656	RP3-462D8.2	2.16e-31
cg09849405	CMTM2	2.17e-31
cg25545500	OR8K1	2.17e-31
cg13916740	ZNF582;ZNF582-AS1	2.25e-31
cg23413307	LCE1F	2.27e-31
cg09461837	SDK1	2.29e-31
cg10500702	FLG	2.4e-31
cg14470398	RP11-1191J2.5	2.4e-31
cg14526953	GPR123-AS1	2.4e-31
cg05927742	CCDC169-SOHLH2;CCDC169	2.44e-31
cg03234732	RP11-281O15.8;ZNF454	2.47e-31
cg13769223	JAM2	2.54e-31
cg18223379	BPIFB6	2.58e-31
cg12975779	DPY19L2P1	2.64e-31
cg06808011	ZNF200	2.67e-31
cg10902717	ZNF454	2.74e-31
cg04260507	Z69720.3	2.77e-31
cg07833420	HTR1E	2.78e-31
cg09686443	CCDC37-AS1;CCDC37	2.84e-31
cg13297960	NCAM2	2.86e-31
cg22720041	CTC-512J12.4;ZNF229	2.91e-31
cg25247290	WT1-AS_7;WT1-AS_8	2.93e-31
cg24307799	CHL1-AS2	2.93e-31
cg24456365	MMP16	3e-31
cg00937286	RP11-452N4.1	3.02e-31
cg16138150	GDNF;GDNF-AS1	3.05e-31
cg07829842	DKFZP434H168	3.13e-31
cg13372231	UBQLN3	3.14e-31
cg22776856	THOC6	3.2e-31
cg07525003	CCDC169-SOHLH2;CCDC169	3.21e-31
cg02930356	CYP4F35P	3.22e-31
cg06652199	KCNA1	3.24e-31
cg12766736	WT1-AS_6;WT1-AS_7;WT1-AS_8	3.24e-31
cg10090591	RP11-110I1.12	3.26e-31
cg16619378	RP11-214O1.2	3.28e-31
cg14749465	NELL1	3.29e-31
cg03957884	BASP1P1	3.32e-31
cg07344468	RP11-676M6.1	3.35e-31
cg08297751	HAND2-AS1	3.38e-31
cg20180050	C8orf46	3.4e-31
cg00852573	KCNQ5	3.41e-31
cg09857577	C7orf72	3.48e-31
cg21065959	LCE1E	3.57e-31
cg26800915	OR51B4	3.61e-31
cg08793792	LINC00403	3.65e-31
cg12988424	PTPRG-AS1	3.66e-31
cg02347881	LINC00410	3.66e-31
cg00017489	DPP6	3.79e-31
cg10501976	GCM2	3.83e-31
cg09118932	PXDN	3.89e-31
cg09912350	GUCY1A3	3.89e-31
cg15058253	RP11-545G3.2	3.9e-31
cg20727142	AC092675.4	4.06e-31
cg23980760	ACCSL	4.07e-31
cg24005701	TRIM64B	4.1e-31
cg04917226	TWIST1;AC003986.7	4.32e-31
cg13728287	AC091705.2	4.46e-31
cg24228819	CHRM2	4.54e-31
cg18338311	C17orf102;TMEM132E	4.62e-31
cg20025658	CXCR1	4.77e-31
cg00089091	DPP10-AS1	4.83e-31
cg13935485	LINC01377	5.01e-31
cg09739536	RP11-281O15.2	5.22e-31
cg15112032	PCDH17	5.23e-31
cg08866665	XXyac-YX65C7_A.3	5.28e-31
cg20821042	HLA-DQA2	5.4e-31
cg05684371	MIR1324	5.42e-31
cg25013011	TMEM132D	5.42e-31
cg10159215	LPPR5	5.43e-31
cg11549615	PREX2	5.58e-31
cg18347153	DPY19L2P4	5.6e-31
cg18515591	BTG4;MIR34B;MIR34C	5.66e-31
cg01777643	RP11-100E13.1	5.72e-31
[truncated: 62,736 more rows]

## Sheet: HNSC
probe	gene	adj.P.Val
cg26450106	CST7	1.55e-131
cg15811515	CTD-2014E2.5;CSDAP1	1.11e-126
cg22674699	HOXD9	2.62e-126
cg08566455	RHOQP3	4.3e-115
cg06051311	TRIM15	6.33e-112
cg16057598	DLX2;DLX2-AS1	6.09e-104
cg19303187	DLX2	1.87e-100
cg20779964	CBLN4	2.01e-98
cg05661282	ZNF154	5.87e-98
cg10659886	ZSCAN18	1.22e-96
cg05937737	SLC7A14	2.21e-96
cg02772121	TRIM15	3.11e-96
cg09340639	FCRL1	5.36e-96
cg05697849	ELAVL4	6.32e-96
cg03192598	CTD-2666L21.1	1.67e-95
cg07095330	5S_rRNA	1.05e-94
cg06383163	FAM135B	3.19e-93
cg18862481	TRH	9.22e-93
cg03964958	HOXD12	1.14e-90
cg11294513	ZNF154	1.06e-89
cg07792478	MIR124-2	2.01e-89
cg19126169	RP11-849H4.4	1.64e-88
cg14789818	RNA5SP77	1.66e-87
cg02014107	DLX2;DLX2-AS1	3.04e-87
cg20950167	RP11-445F12.2	3.66e-87
cg12422154	TRIM15	4.09e-87
cg22620221	DPP6	1.07e-86
cg20839149	SH2D2A	1.63e-86
cg02700891	TRH	3.03e-86
cg26904260	MIR7154	8.38e-86
cg27537125	MIR4425	8.6e-86
cg11940285	TRH	9.2e-86
cg20699586	RNA5SP77	2.05e-85
cg15427886	RP11-53M11.5	1e-84
cg18267049	TPM4P1	2.09e-83
cg25774643	CDHR5;SCT	2.52e-83
cg22195627	CTD-2666L21.1	3.47e-83
cg24415208	CACNG8	4.83e-83
cg19526685	LINC00861	5.03e-83
cg19619405	ADAMTS20	6.04e-83
cg03719032	HAPLN4	7.68e-83
cg15037137	HOXA2	1.52e-82
cg11161597	RP13-977J11.9	5.4e-82
cg23131909	MIR26B	5.51e-82
cg16783744	DPYS	1.11e-81
cg03111498	VSX1	1.25e-81
cg21790626	ZNF154	1.35e-81
cg01518607	XXbac-BPGBPG24O18.1	1.49e-81
cg26444528	RP11-95F22.1	3.52e-81
cg14577406	RP11-120J1.1	6.3e-81
cg20887442	RP11-849H4.4	8.33e-81
cg23746497	LINC00577	1.33e-80
cg23752828	DCTN2	2.09e-80
cg13678973	ELAVL4	2.25e-80
cg18024113	RP5-875O13.1;U1	2.5e-80
cg02462868	HOXB7	3.03e-80
cg25681339	BHLHA9	3.82e-80
cg03045635	DRD5	2.77e-79
cg01758512	FUT9	7.91e-79
cg16659284	RP11-276H1.2	1.01e-78
cg20449685	ZSCAN1	1.18e-78
cg20591728	HOXB3;HOXB6	4.99e-78
cg26422458	ELTD1	6.43e-78
cg04396850	LINC00944	8.99e-78
cg14699728	NPAS4	1.02e-77
cg09574499	HOXA-AS3	1.18e-77
cg27392771	CTC-239J10.1	1.42e-77
cg27086014	SIGLEC12	1.66e-77
cg00249511	CDHR5;SCT	3.15e-77
cg12149795	DIP2A-IT1	7.11e-77
cg17971015	CTD-2666L21.1	1.32e-76
cg05376374	MIR129-2	1.59e-76
cg04110105	CCR2	2.48e-76
cg05809668	AC009531.2	5.34e-76
cg15207993	S100A14	1.59e-75
cg14231297	ZSCAN18	1.66e-75
cg03222672	MIR600HG	1.67e-75
cg17059658	ADCYAP1	1.89e-75
cg06360427	GALR1	5.48e-75
cg01132893	HOXB7	6.07e-75
cg00123055	SOX17	9.68e-75
cg10689404	RP11-445F12.2	1.29e-74
cg08668790	ZNF154	1.34e-74
cg04425920	DRGX	1.37e-74
cg13356896	BOLL	1.56e-74
cg17918937	AC100830.3	1.57e-74
cg18322569	BARHL2	1.66e-74
cg07780543	ABCC9	2.71e-74
cg20981848	RP4-742J24.2	4.1e-74
cg13018120	CD300E	4.31e-74
cg02623400	ELAVL4	4.57e-74
cg08393041	ZIC1	5.58e-74
cg08296903	CTD-2135D7.2	6.1e-74
cg24496475	NKX1-1	7.59e-74
cg11692307	RP3-395M20.2;RP3-395M20.3	9.42e-74
cg11855615	E2F3P1	1.56e-73
cg21245816	ANXA2R	2.54e-73
cg24221648	RP11-52L5.6	4.49e-73
cg08833577	VAX1	4.67e-73
cg02875879	MIR367;MIR302D;MIR302A;MIR302C;MIR302B	4.89e-73
cg19912142	RP11-328K15.1	5.29e-73
cg11379081	RP11-385M4.3	5.71e-73
cg27516568	TMEM155	6.38e-73
cg15621697	RP11-1J11.1	6.46e-73
cg23241878	CEACAM5	1.28e-72
cg07078225	KRT87P	1.32e-72
cg12506930	ZNF154	1.45e-72
cg18556676	ABCC9	2.25e-72
cg14836636	RP11-768F21.1	2.5e-72
cg03738025	LINC00577	2.65e-72
cg27563985	CBLN4	4e-72
cg18975416	MIR4425	4.27e-72
cg05133853	HBBP1	4.8e-72
cg03858673	ZBED9	6.39e-72
cg21908235	RNVU1-8	6.61e-72
cg21039708	OTX2;OTX2-AS1	6.81e-72
cg01496199	IFNL4P1	1.34e-71
cg08364561	PAUPAR	1.39e-71
cg25260137	RP11-32K4.1	1.84e-71
cg04224064	NKX2-1	2.21e-71
cg18969232	RP11-89K21.2	2.62e-71
cg08460635	MIR26B	2.99e-71
cg13358636	AC079154.1;CNTNAP5	3.26e-71
cg13482308	RP11-297B17.3	3.61e-71
cg12017745	SIPA1	5.78e-71
cg25763393	ZNF578	7.22e-71
cg12571879	MCEMP1;CTD-3214H19.16	9.52e-71
cg27032232	DPP6	1.07e-70
cg20624923	PRLHR	2.6e-70
cg06888121	HOXA-AS3	3.89e-70
cg26492368	SPAG6	4.54e-70
cg17726575	E2F6	6.57e-70
cg18675097	NKAPL	7.02e-70
cg09238677	C3AR1	8.43e-70
cg07355926	CTB-31O20.6	8.88e-70
cg12372106	IGFBP7-AS1	8.89e-70
cg26381313	SEC31B	1.15e-69
cg01405040	HOXD12	1.38e-69
cg18105139	ZSCAN12P1	1.58e-69
cg00939495	DRD5	2.04e-69
cg19592277	GPR75-ASB3;GPR75	2.93e-69
cg16749093	SIPA1	5.87e-69
cg04534765	GALR1	6.56e-69
cg22310062	ESCO1	6.59e-69
cg01009664	TRH	8.72e-69
cg10906284	AVPR1A;RP11-715H19.2	9.03e-69
cg05506480	RAB6B	1.52e-68
cg18131141	RP4-728D4.2	1.62e-68
cg14587524	ZFP30;ZNF781	2.19e-68
cg10132208	ZSCAN1	2.27e-68
cg15858970	ANKRD66	2.36e-68
cg11070069	LINC00577	2.41e-68
cg24114014	ZBED9	2.87e-68
cg13912117	ADCY8	2.92e-68
cg23774016	OR10J3	3.43e-68
cg09936561	DRD5	4.49e-68
cg09209669	PIK3R6	5e-68
cg14216068	HOXA-AS2	6.22e-68
cg00468228	CRH	6.68e-68
cg15320998	ZNF212	6.89e-68
cg22637867	ZNF709	8.88e-68
cg03696599	AC079154.1;CNTNAP5	9.63e-68
cg11823511	BARHL2	9.93e-68
cg26595643	VAX1	1e-67
cg08032924	CMTM2	1.08e-67
cg06594404	RP11-2H3.7	1.11e-67
cg13356253	GPR75-ASB3;GPR75	1.17e-67
cg24437737	HIST2H2BB;RP5-998N21.10;RP5-998N21.7;HIST2H3PS2	1.76e-67
cg01408508	MIR663A	1.85e-67
cg13507224	OR10J3	1.94e-67
cg07696099	HPYR1	1.94e-67
cg23348723	PPP1R17	2.3e-67
cg11510523	CTD-2666L21.1	2.52e-67
cg05167251	HOXD9	2.55e-67
cg19025113	RP11-89K21.2	3.56e-67
cg26132774	RP11-52L5.6	3.6e-67
cg01287000	AF186192.6	4.87e-67
cg16399049	HS3ST2	5.81e-67
cg18811550	HOXA7;RP1-170O19.24	6.06e-67
cg13539545	SIX6	6.6e-67
cg24685006	RP4-728D4.2	6.96e-67
cg07763768	MIR600HG	7e-67
cg04645150	ZBED9	8.25e-67
cg15092343	MSX1	8.42e-67
cg24411961	AC115286.1	9.28e-67
cg23725321	SEC31B	1.06e-66
cg07318128	HOXB3;HOXB6	1.46e-66
cg24390913	VAX1	1.48e-66
cg26619943	MIR6775	1.61e-66
cg17849569	ZSCAN12P1	2.23e-66
cg12451530	GPR75-ASB3;GPR75	2.73e-66
cg21884231	SLC7A14	2.99e-66
cg24169915	C14orf177	3.15e-66
cg14851701	RP13-507P19.2	3.25e-66
cg21080533	PGK2	3.75e-66
cg03234186	ZNF154	4.42e-66
cg26894523	Z95704.3	1.96e-65
cg23883696	RP11-676J15.1	2.19e-65
cg04150495	MIR663A	2.26e-65
cg19801921	LINC00466	4.1e-65
cg04597433	DRD5	4.64e-65
cg01452847	HOXB7;MIR196A1	5.97e-65
cg08158952	ZNF835;AC007228.5	6.74e-65
cg02778609	UBFD1	7.7e-65
cg03526459	RNVU1-8	1.02e-64
cg07473553	ALG1L	1.13e-64
cg14045814	MIR26B	1.18e-64
cg09577391	ZNF606	1.41e-64
cg02164046	SST	1.43e-64
cg11859607	RP11-672L10.3	1.74e-64
cg22779651	TMA16	1.79e-64
cg26002103	DLX2;DLX2-AS1	2.07e-64
cg25284213	MIR206	2.23e-64
cg23303108	TNFRSF10A	2.59e-64
cg00926400	BOLL	3.38e-64
cg19664945	GPR75-ASB3;GPR75	3.53e-64
cg25092838	OTX2;OTX2-AS1	4.78e-64
cg26279070	RHOQP3	6.33e-64
cg12744820	OLIG3	6.9e-64
cg23847712	DRD5	8.14e-64
cg07864883	HHATL-AS1	8.7e-64
cg16422098	ITGA8	8.99e-64
cg25390506	C7orf73	9.04e-64
cg17134153	FCRL3	1.09e-63
cg27049766	ZNF154	1.18e-63
cg16288089	TAC1	1.44e-63
cg08668316	RP11-2H3.7	1.46e-63
cg16431978	KRTAP13-2;KRTAP13-3	1.51e-63
cg07153966	HOXA-AS2	1.53e-63
cg21512644	RP11-92A5.2;NPY2R	1.86e-63
cg09475041	F9	2.04e-63
cg03323462	RP11-445F12.2	2.06e-63
cg24398479	HOXA3;RP1-170O19.22;HOXA6;RP1-170O19.23	2.16e-63
cg27109129	CXCL5	2.48e-63
cg04917181	TSPYL5	2.99e-63
cg07167423	RP4-728D4.2	3.02e-63
cg14416371	MIR129-2	3.08e-63
cg26296488	DRD5	3.21e-63
cg08171483	MIR26A1	3.33e-63
cg14523847	DPP6	4.32e-63
cg14925616	CTC-239J10.1	5.11e-63
cg00892353	UBA52P5	5.23e-63
cg09568464	ZNF582;ZNF582-AS1	5.36e-63
cg23647410	HLX	5.51e-63
cg00345366	SAAL1;HIGD1AP5	5.52e-63
cg19421752	SLC6A18	5.77e-63
cg11154559	RP11-403I13.5	6.01e-63
cg11764900	RP3-503A6.2;DNAH8	6.57e-63
cg13485320	SLC22A18	6.87e-63
cg00444151	RP11-1094M14.8	8e-63
cg14885748	LINC00943	9.58e-63
cg20170777	COX10	1.01e-62
cg06668555	FAM135B	1.22e-62
cg08022436	AC061961.2	1.45e-62
cg22288613	AGGF1P1	1.48e-62
cg13240116	HOXA-AS2	1.48e-62
cg25684999	PTF1A	1.55e-62
cg02930356	CYP4F35P	2.09e-62
cg25727671	HOXA3;RP1-170O19.22;RP1-170O19.23	2.26e-62
cg04744409	LINC00577	2.3e-62
cg14991487	HOXD9	2.57e-62
cg09907936	ZNF135	2.94e-62
cg09004581	MTO1	3.92e-62
cg19223411	MIR26B	4.26e-62
cg18067859	SLFN13	4.47e-62
cg13212525	OTOL1	5.71e-62
cg14410016	HOXD9	6.78e-62
cg14944647	MIR129-2	9.13e-62
cg07631533	AC092380.1	9.62e-62
cg01495831	OR5H15	1.18e-61
cg22864077	KLF2P2	1.27e-61
cg02454464	PIH1D1	1.38e-61
cg22417733	RP1-101K10.6	1.57e-61
cg04739647	HOXD9	1.83e-61
cg07907386	RP11-227F19.1	1.83e-61
cg04470557	P4HA2	1.93e-61
cg00702638	KIAA1143;KIF15	2.55e-61
cg19537184	MIR526A1;MIR520C	2.59e-61
cg04336859	SIGLEC12	2.63e-61
cg21885317	UBA52P5	3.37e-61
cg01198033	AC008060.5	3.4e-61
cg06616729	RP11-53M11.5	3.65e-61
cg07105285	MTNR1B	3.84e-61
cg05983315	ZSCAN1	4.02e-61
cg03217253	ZNF677	4.58e-61
cg10778841	SORCS3	4.96e-61
cg15396204	RP11-233E12.2	5.04e-61
cg13563074	OVCH2	5.18e-61
cg12346967	KRTAP8-1	5.32e-61
cg11725972	RP5-912I13.1	5.44e-61
cg27005118	COX10	5.47e-61
cg00563824	RP11-385M4.3	5.52e-61
cg17712694	RP11-19O2.2	5.7e-61
cg06469345	DRD5	5.96e-61
cg19127840	MIR223	7.63e-61
cg10168149	SATB2	7.8e-61
cg07163845	RP11-731F5.1	8.32e-61
cg13628022	TTLL11-IT1	1.04e-60
cg20608990	CASP8	1.06e-60
cg05202804	SWSAP1	1.08e-60
cg08149193	ALX4	1.13e-60
cg07441518	PAUPAR	1.22e-60
cg19737787	PDX1	1.25e-60
cg26366833	CD300LF	1.4e-60
cg13155490	AQP12B	1.45e-60
cg20449590	RNVU1-8	1.63e-60
cg20831708	SEC31B	1.65e-60
cg15556502	MIR129-2	1.86e-60
cg01268824	ZNF154	1.9e-60
cg09191036	DRD5	1.91e-60
cg25564800	KPNA1	2.62e-60
cg03611452	ZFP30;ZNF781	2.85e-60
cg02631126	ZSCAN12P1	3.1e-60
cg13703871	ZNF177	4.24e-60
cg23035602	TPM3P9;ZNF761	4.85e-60
cg15359390	REG1P	4.94e-60
cg14042889	HOXA-AS3	5.04e-60
cg20810997	DEFB119	5.07e-60
cg25324105	ZFP30;ZNF781	5.19e-60
cg16150752	RP11-19O2.2	5.43e-60
cg14345012	MIR663A	5.53e-60
cg16263367	TPM3P9;ZNF761	6.29e-60
cg17487029	LINC01519	7.13e-60
cg08611810	GPR75-ASB3;GPR75	7.23e-60
cg04244985	KIR3DX1	7.44e-60
cg18254356	ANXA2R	8.23e-60
cg20850602	MED9	9.87e-60
cg21049958	CEACAM4	1.06e-59
cg15316843	RP11-32K4.1	1.24e-59
cg05239310	CTD-2240H23.2	1.26e-59
cg22690188	TLE1P1	1.52e-59
cg09513990	XXbac-BPGBPG24O18.1	1.63e-59
cg15148918	TMEM120A	1.65e-59
cg19011552	MIR514A2	1.67e-59
cg16006349	HOTAIR_4;HOTAIR_5	2.08e-59
cg10630085	RP11-809N8.2	2.35e-59
cg23741006	TCN1	3.36e-59
cg17437939	TAC1	3.41e-59
cg04741366	LINC01304	3.82e-59
cg23479922	RP11-19O2.2	4.09e-59
cg26306437	CST7	4.68e-59
cg14200170	ADCYAP1	4.91e-59
cg01015662	RP11-115D7.3	5.77e-59
cg17840719	ZNF454	5.93e-59
cg04733537	TMEM132D	7.23e-59
cg20311863	BARHL2	8.34e-59
cg15103195	AP1S1	1.01e-58
cg19672997	MDGA2	1.06e-58
cg12606911	CD8A	1.5e-58
cg03602280	PIEZO2	1.59e-58
cg20465661	OR2T6	1.6e-58
cg20181079	OR4D11	1.62e-58
cg26985798	MS4A15	1.9e-58
cg23095743	PITX3	2.24e-58
cg15300436	MYT1L-AS1	2.27e-58
cg08014964	MYH4	2.31e-58
cg01565438	SLFN13	2.75e-58
cg08049592	AQP12B	3.47e-58
cg07053841	OR2W1	3.6e-58
cg11932205	NME8	3.61e-58
cg10739556	HOXA3;RP1-170O19.22;HOXA6;RP1-170O19.23	3.94e-58
cg15157455	HIST2H2BB;RP5-998N21.10;RP5-998N21.7;HIST2H3PS2	3.95e-58
cg14933439	C16orf78	4.75e-58
cg16993682	CD1C	4.79e-58
cg25496678	VAX1	4.96e-58
cg07495363	BOLL	5.1e-58
cg10940251	MIR208A	5.15e-58
cg06495961	DPP6	5.2e-58
cg26369418	CSF2	5.33e-58
cg03316101	OR52M1	5.61e-58
cg20395967	MIR663A	5.64e-58
cg16108230	VGLL2	5.65e-58
cg19718563	CTD-2162K18.3	7.07e-58
cg25631489	PHC3	7.3e-58
cg15074033	KRT87P	7.74e-58
cg13352750	HOXA11;HOXA11-AS1_1;HOXA11-AS1_2;HOXA11-AS1_3;HOXA11-AS1_4	7.86e-58
cg18808904	RP4-742J24.2	8.01e-58
cg21694941	RP11-17A4.2	8.64e-58
cg03478444	C16orf78	9.06e-58
cg18693673	ZSCAN18	9.33e-58
cg07230581	OPCML	1.09e-57
cg03679755	TPM4P1	1.11e-57
cg09487078	CCR6	1.32e-57
cg09968620	HOXD9	1.48e-57
cg01059331	RP4-798A10.4	1.56e-57
cg11229513	PRDM14	1.56e-57
cg18025409	RP5-892F13.2	1.8e-57
cg10872075	IGHD3-16	2e-57
cg19161124	DPP6	2.1e-57
cg17820022	RP3-395M20.2;RP3-395M20.3	2.12e-57
cg17004025	PRTN3	2.28e-57
cg20054157	SFTA1P	2.41e-57
cg04611437	SEC31B	2.46e-57
cg25259754	FCRL3	2.46e-57
cg07379055	CTD-2666L21.1	2.56e-57
cg17015994	CYP11B1	2.65e-57
cg24802813	TRGV5	2.7e-57
cg15077193	MIR4745	3.32e-57
cg21485303	ABCC9	3.38e-57
cg08074851	KCNK12	3.38e-57
cg12877723	RP11-17A4.2	3.53e-57
cg18449120	LINC01248;AC108025.2;SOX11	3.55e-57
cg10919344	OR5A1	3.59e-57
cg03978375	IRF8	3.6e-57
cg13138089	ECEL1P2	3.61e-57
cg18268547	NPLOC4	3.77e-57
cg01219451	TLE1P1	3.98e-57
cg26530341	TNFRSF10A	4.85e-57
cg19876814	PCDHA13	5.68e-57
cg17026542	OR2A4	6.41e-57
cg18440069	MIR379;MIR411;MIR299	8.5e-57
cg05177629	SEMG1	8.74e-57
cg14153654	RP5-892F13.2	8.81e-57
cg15155441	APLNR	8.84e-57
cg14278300	AKR1D1P1	8.88e-57
cg18325622	RP11-19O2.2	9.51e-57
cg08288811	PCDHA3	9.78e-57
cg12614283	MAGEC1	1.1e-56
cg02000318	HOXA7;RP1-170O19.24	1.1e-56
cg21529807	CEACAM4	1.18e-56
cg06073348	RP11-351I21.7	1.19e-56
cg12488585	EP400	1.28e-56
cg25626375	OC90	1.44e-56
cg05768427	KBTBD12	1.48e-56
cg11657849	RP11-658F2.8	1.59e-56
cg00284551	SNORD115-8;SNORD115-9	1.81e-56
cg02473540	ZNF135	1.82e-56
cg01939477	MIR129-2	1.82e-56
cg22007110	INMT	2.1e-56
cg12423493	FKBP2	2.5e-56
cg27599792	PCDHGA10	2.5e-56
cg04499514	C3AR1	2.5e-56
cg05455720	MIR124-2	2.52e-56
cg05343159	NPS	2.57e-56
cg12122146	TMEM132D	2.65e-56
cg25397945	ZNF529;ZNF382	2.86e-56
cg13644317	NETO1	3.13e-56
cg26180469	AP001453.1	3.43e-56
cg22771332	AC073869.20	3.46e-56
cg04021697	TP73	3.58e-56
cg09936218	TRGV11	3.98e-56
cg06123346	ATP4A	4.05e-56
cg07580831	AC011754.1	4.77e-56
cg02531437	PRLHR	5e-56
cg20640432	CREB3L3	5.08e-56
cg18252309	DPP6	5.26e-56
cg26970841	IRF8	5.76e-56
cg13597544	RP11-1055B8.4	5.85e-56
cg12374721	PRAC1;PRAC2;HOXB13-AS1_1;HOXB13-AS1_2	5.85e-56
cg26959384	OR5AH1P	6.23e-56
cg01026898	AC068858.1	6.27e-56
cg05740582	HPYR1	6.53e-56
cg00134295	A2M	6.6e-56
cg07332769	U1	7.69e-56
cg14712186	BARHL2	8.37e-56
cg09578028	HOXD9	8.89e-56
cg01970336	EPS15	9.91e-56
cg06122871	TBX18	9.95e-56
cg19403534	PRLHR	1.07e-55
cg20778958	OR6P1	1.21e-55
cg25743481	KIAA1143;KIF15	1.24e-55
cg14041069	FAM129C	1.28e-55
cg03794801	E2F3P1	1.3e-55
cg01687040	DCD	1.32e-55
cg27294268	SFTA3	1.41e-55
cg03731268	L1TD1	1.55e-55
cg18074820	RP11-35O15.2	1.56e-55
cg10537450	RP11-495P10.4	1.6e-55
cg22026150	PSAT1P1	1.85e-55
cg08065231	ZNF177	1.88e-55
cg03874199	HOXD12	1.9e-55
cg18944984	NR1H4	2.02e-55
cg17508591	PCDHA7	2.35e-55
cg15298173	RP11-300A12.2;TUBBP8	2.46e-55
cg08638320	FOXD2-AS1;FOXD2	2.73e-55
cg14267780	KRTAP5-4	2.81e-55
cg24368848	ZSCAN1	2.91e-55
cg06454760	ZNF135	3.08e-55
cg03368099	HOXA5	3.14e-55
cg11661281	OR6Q1;OR6Q1	3.3e-55
cg03354554	RP11-540A21.2	3.4e-55
cg09926260	MIR515-1;MIR519E	3.47e-55
cg02919422	SOX17	3.95e-55
cg02885007	HOXD9	4.17e-55
cg19404979	ELSPBP1	4.19e-55
cg02051771	PCDHA13	4.23e-55
cg09017434	RP11-19O2.2	4.39e-55
cg20038038	AC245036.1	4.71e-55
cg19414741	RP11-17A4.2	5.56e-55
cg03208902	OR1F2P	5.66e-55
cg14522034	BX322557.10	5.67e-55
cg14063191	ZDHHC12;RP11-545E17.3	5.99e-55
cg03453744	HOXB-AS3	6.4e-55
cg17309610	SRSF8	6.64e-55
cg20672708	TM9SF4	6.95e-55
cg00282706	ANO2	7.03e-55
cg03524083	RP11-676J15.1	7.18e-55
cg16620526	AQPEP	7.41e-55
cg08538258	BX322557.10	7.42e-55
cg14891410	WT1;WT1-AS_3;WT1-AS_6	7.47e-55
cg16587616	KHDRBS2	7.52e-55
cg03677056	E2F3P1	7.82e-55
cg15362155	SCGB1D4	7.93e-55
cg22665383	OR4C16;OR4C16	8.04e-55
cg19098763	ELAVL4	8.06e-55
cg22157099	AC008271.1	8.19e-55
cg18109874	CTB-55O6.13	8.93e-55
cg26171114	SNORD115-2	9.38e-55
cg23399286	OC90	9.44e-55
cg22488256	PDE4B	9.65e-55
cg02336334	MIR518A2	9.65e-55
cg19071002	RP11-184C23.4	9.68e-55
cg16195332	CACYBPP3	9.74e-55
cg01722932	MTNR1B	1.09e-54
cg04598121	RP11-17A4.2	1.29e-54
cg20637915	RP13-977J11.9	1.31e-54
cg18351099	ZNF845	1.47e-54
cg07616094	MIR670	1.51e-54
cg22121557	ZBED9	1.53e-54
cg09305680	UTP23	1.63e-54
cg19861288	IGFBP7-AS1	1.64e-54
cg13636952	TRBV29-1	1.66e-54
cg00910715	RHOQP2	1.67e-54
cg09186408	MIR6777;MIR33B	1.69e-54
cg17980283	RP11-89K21.2	1.7e-54
cg21699044	RP11-32K4.1	1.77e-54
cg26458072	SEC31B	1.96e-54
cg15700197	OR10J1	1.97e-54
cg01921432	BARHL2	2.11e-54
cg11864327	RP11-281O15.2	2.17e-54
cg05109569	HOXA-AS2	2.55e-54
cg27062795	ZSCAN5A;AC006116.21;ZNF542P	2.58e-54
cg02694427	HOXD12	2.72e-54
cg21367811	HOXA-AS3	2.74e-54
cg20839206	ZBED9	2.87e-54
cg14015441	DPYS	3.13e-54
cg13451356	RP11-115D7.3	3.16e-54
cg09661370	HOXA11;HOXA11-AS1_1;HOXA11-AS1_2;HOXA11-AS1_3;HOXA11-AS1_4	3.16e-54
cg24493649	SLC44A4	3.48e-54
cg03308399	HOXA-AS2	3.54e-54
cg08165221	LINC01248;AC108025.2;SOX11	3.64e-54
cg23963802	TPM4P1	4.1e-54
cg17486097	UNC5D	4.13e-54
cg13561879	UNC5D	4.3e-54
cg06463958	T	4.72e-54
cg00480389	CBLN4	4.99e-54
cg21751145	C2orf88	5.06e-54
cg12670347	TBX5	5.08e-54
cg01888055	SNORD115-18;SNORD115-19	5.75e-54
cg13901453	NNAT	6.16e-54
cg14703224	SST	6.23e-54
cg06643227	C9orf84	6.26e-54
cg24888989	KIAA1143;KIF15	6.5e-54
cg07525077	RNASE3	6.72e-54
cg24544047	SH2B2	6.88e-54
cg00448814	NKAPL	7.42e-54
cg01524278	HOTAIR_2	7.93e-54
cg07014673	GBX2	8.71e-54
cg24278165	TNFRSF10A	9.14e-54
cg23435915	ANXA2R	9.17e-54
cg23906738	NKX2-1-AS1	9.48e-54
cg16364467	TRAV6	1e-53
cg19878627	GPR75-ASB3;GPR75	1.02e-53
cg25339566	TCTEX1D1	1.02e-53
cg10099957	MIR6775;RP4-536B24.2	1.11e-53
cg26043322	OR10J5	1.11e-53
cg10642330	NNAT	1.12e-53
cg07977614	RP11-561I11.4	1.16e-53
cg20661138	AF186192.1;AF186192.5	1.23e-53
cg01975505	ELSPBP1	1.23e-53
cg01127423	CTD-2210P24.1	1.36e-53
cg10424681	C6orf201	1.4e-53
cg01287975	TAC1	1.44e-53
cg18694169	NKAPL	1.57e-53
cg20291321	BX842568.2	1.61e-53
cg09687738	HTR2C	1.69e-53
cg04559779	MIR124-2	1.87e-53
cg04111071	TMEM196	1.92e-53
cg01015123	OTOL1	1.96e-53
cg04764012	CTD-2014E2.5;CSDAP1	2.38e-53
cg05311410	HOXA11;HOXA11-AS1_1;HOXA11-AS1_2;HOXA11-AS1_3;HOXA11-AS1_4;HOXA11-AS1_5	2.45e-53
cg20714551	AC005514.2	2.52e-53
cg18011916	TBX20	2.57e-53
cg07462756	MSX1	3.27e-53
cg22438763	FOXD2-AS1;FOXD2	3.37e-53
cg07536847	PAX7	3.54e-53
cg01022345	MIR770	3.57e-53
cg17948136	CTD-2291D10.4;ZNF730	3.6e-53
cg01715455	VSX1	3.84e-53
cg16453617	RP11-616M22.3	5.22e-53
cg04096519	RP11-804A23.4	5.64e-53
cg20792256	OR7A17	5.98e-53
cg26377653	MIR1283-1	6.36e-53
cg23263937	HOXA3;RP1-170O19.22;RP1-170O19.23	6.5e-53
cg13897914	NDUFAF1	6.72e-53
cg24576945	HHATL-AS1	6.82e-53
cg14844130	VPREB1	8.18e-53
cg08441806	NKX6-2	8.72e-53
cg02578944	NKAPL	9.06e-53
cg13195526	IL22	9.21e-53
cg09880291	HOXA5	9.76e-53
cg02423618	SPATA8	9.78e-53
cg01876338	GPR75-ASB3;GPR75	1.02e-52
cg19258062	KMT2C;FABP5P3	1.03e-52
cg10801060	ANXA2R	1.04e-52
cg09578475	ZNF177	1.04e-52
cg14768785	GHSR	1.04e-52
cg24229750	UBQLN3	1.04e-52
cg00721170	CXCL5	1.05e-52
cg24627900	HPYR1	1.07e-52
cg26955996	CABP5	1.1e-52
cg18032812	RP13-580B18.1	1.13e-52
cg02597299	GLRA1	1.16e-52
cg08655953	RP3-395M20.2;RP3-395M20.3	1.16e-52
cg01345315	ADAMTS20	1.22e-52
cg04127342	RP11-17A4.2	1.29e-52
cg17227967	LAMP5-AS1	1.29e-52
cg04907244	SNORD93	1.3e-52
cg06961429	MIR329-1;MIR329-2	1.31e-52
cg18874332	NR1H4	1.48e-52
cg13438893	RP11-52L5.6	1.5e-52
cg18878432	HOXB3;HOXB6	1.54e-52
cg21553182	ZNF578	1.57e-52
cg16002818	BOLL	1.67e-52
cg04874562	OR51I1	1.77e-52
cg15203777	CADM3	1.77e-52
cg17030173	RP11-19O2.2	1.78e-52
cg16723982	EIF2AK4	1.8e-52
cg12640000	L1TD1	2.05e-52
cg07609862	MTNR1B	2.11e-52
cg01748892	HOXA5	2.31e-52
cg02510802	SUN5	2.39e-52
cg26202762	SNORD115-10	2.79e-52
cg08768395	RNU6-923P	2.86e-52
cg08315202	NPTX2	2.87e-52
cg00969405	HOXA5	3.02e-52
cg03782800	RP13-977J11.9	3.15e-52
cg03314644	HEATR5A	3.17e-52
cg16458866	RP11-115D7.3	3.21e-52
cg16142855	RP11-2H3.7	3.41e-52
cg18462653	DEFB119	3.42e-52
cg17384457	CEACAM20	3.67e-52
cg14055212	LHFPL3-AS1	3.72e-52
cg13420089	UNQ6494	3.72e-52
cg23034757	PCDHGB6	3.75e-52
cg17536595	RSPH9	3.9e-52
cg02226239	CYP11B2	3.96e-52
cg11214140	SOX17	4.06e-52
cg06132400	AC006033.22	4.19e-52
cg25181710	PTGES3P2	4.34e-52
cg01464104	OR5T1	4.39e-52
cg05919685	APCS	5.17e-52
cg10088985	CXCL5	5.19e-52
cg26452868	PCDH15	5.29e-52
cg27553638	SPANXA1;SPANXD	5.38e-52
cg09624466	OTX2;OTX2-AS1	5.52e-52
cg05143386	OR7G2	5.72e-52
cg01651728	MIR892C;MIR890;MIR888	5.94e-52
cg15854847	NKX2-6;RP11-175E9.1	6.25e-52
cg24935332	PAUPAR	6.84e-52
cg19188855	HOTAIR_2	7.22e-52
cg05414908	GPR75-ASB3;GPR75	7.41e-52
cg18247055	SPAG6	8.04e-52
cg22851691	HOXB7;MIR196A1	8.5e-52
cg16823083	TP73	9.05e-52
cg00280758	NAA15	9.87e-52
cg03597347	ZSCAN12P1	1.02e-51
cg23690166	HOXB7;MIR196A1	1.04e-51
cg01807825	GK2	1.05e-51
cg24924958	NMBR	1.07e-51
cg22319311	TSPYL5	1.1e-51
cg07648740	HTR5A-AS1	1.1e-51
cg25783892	GHITM	1.14e-51
cg17985646	TBX20	1.14e-51
cg04851268	GHSR	1.29e-51
cg02861926	NLRP11	1.3e-51
cg19592637	VSX1	1.39e-51
cg23933241	RP11-1094M14.8	1.39e-51
cg23474501	GPR123-AS1	1.39e-51
cg09739536	RP11-281O15.2	1.39e-51
cg02621287	RP11-434C1.4	1.44e-51
cg10755235	SIX6	1.5e-51
cg13292202	TSSK1B	1.59e-51
cg03232620	HOXA7;RP1-170O19.24	1.66e-51
cg08648727	ZNF418	1.66e-51
cg10423771	DRGX	1.76e-51
cg07938480	OR1F2P	1.98e-51
cg02507167	RP11-503I22.2	2.05e-51
cg26465391	ZNF154	2.21e-51
cg18856581	MDGA2	2.33e-51
cg00701946	GPR75-ASB3;GPR75	2.37e-51
cg23290121	RP11-118M12.1	2.4e-51
cg19623835	SNORD115-36	2.4e-51
cg04098585	CD28	2.42e-51
cg13202816	EIF3M	2.44e-51
cg11517269	ZSCAN12P1	2.62e-51
cg24164786	CTD-2207P18.1	2.67e-51
cg17408527	ZSCAN18	2.73e-51
cg13545212	SLC13A5	2.75e-51
cg07014174	KRTAP11-1	2.81e-51
cg07816637	PCDHGA9	3.08e-51
cg06913958	BCL10	3.1e-51
cg10362335	TNFSF14	3.37e-51
cg27157482	HOXA9	3.41e-51
cg11954355	RP4-806M20.4;MIR296;MIR298	3.46e-51
cg06298530	SNORD115-36;SNORD115-37	3.64e-51
cg10116178	UBQLNL	3.64e-51
cg16592658	EBI3	3.73e-51
cg21627409	PCDHGA12	3.86e-51
cg21114004	SCGB1D4	4.3e-51
cg11079711	KRT26	4.54e-51
cg14011368	TUNAR	4.57e-51
cg06574716	LYPD5;ZNF283	4.57e-51
cg16919569	HAND2	4.66e-51
cg24023487	SPTLC3	4.68e-51
cg25072962	MS4A15	4.81e-51
cg08701621	ZNF135	5e-51
cg16322014	DNHD1	5.17e-51
cg03053875	LINC00884	5.58e-51
cg11942059	COL9A1	6.38e-51
cg01048962	CTD-2561J22.5	6.6e-51
cg03804732	GRIN2B	7.68e-51
cg07065111	LINC01248;AC108025.2;SOX11	7.99e-51
cg17941572	LINC00466	8.12e-51
cg26432539	SPATA8-AS1;SPATA8	8.36e-51
cg18773937	IL1B	9.34e-51
cg24642468	C16orf78	1.01e-50
cg26940847	PRSS29P	1.01e-50
cg16435923	PCDHGA5	1.04e-50
cg17466857	HOXA11;HOXA11-AS1_1;HOXA11-AS1_2;HOXA11-AS1_3;HOXA11-AS1_4;HOXA11-AS1_5	1.05e-50
cg03682719	ZBED9	1.05e-50
cg11220245	MIR663A	1.08e-50
cg20817661	F13A1	1.08e-50
cg08304190	MIR663A	1.09e-50
cg01573635	TEKT5	1.15e-50
cg11562153	GPX5	1.18e-50
cg01142721	LRIT2	1.18e-50
cg02638567	AC079398.2	1.22e-50
cg02487331	RNVU1-8	1.24e-50
cg07041214	OR56A3	1.29e-50
cg19187564	CEACAM4	1.38e-50
cg26608174	HOXB7;MIR196A1	1.39e-50
cg22638505	ZNF738	1.49e-50
cg03770410	ZNF831	1.53e-50
cg08938584	PCDHGB7	1.58e-50
cg20597215	OR4D6	1.67e-50
cg12648074	PCDHGC4	1.81e-50
cg21919599	NLRP3	1.9e-50
cg23130254	HOXD12	2.06e-50
cg04458776	SLC22A6	2.38e-50
cg00830325	SCGN	2.41e-50
cg11323650	OR8J3	2.74e-50
cg17885226	LINC00577	2.74e-50
cg06498267	HCN1	2.75e-50
cg27204266	SNORD115-12	2.77e-50
cg08109815	NMBR;RP11-137J7.2	2.83e-50
cg08246090	TRAV8-5	2.84e-50
cg09465698	PCDHGB6	2.99e-50
cg03440799	AXDND1	3.05e-50
cg02809611	OR1F1	3.09e-50
cg01703205	TRBV27	3.15e-50
cg05579037	HOXA5	3.23e-50
cg07405182	RP11-115D7.3	3.33e-50
cg21078414	SNORD115-44	3.39e-50
cg08036309	LINC01097	3.42e-50
cg14290904	NKX2-1-AS1	3.65e-50
cg00379720	ZNF728	3.68e-50
cg06428620	PCDHGC4	3.76e-50
cg04880751	KMO	3.91e-50
cg04784475	ZFP30;ZNF781	3.91e-50
cg24766821	FSIP2	4.41e-50
cg27616751	CLDN15	4.59e-50
cg08100618	DCAF12L1	4.69e-50
cg13615402	SNORD115-30	4.78e-50
cg27290624	LINC00884	5.07e-50
cg16259931	MORC1;FLJ22763	5.22e-50
cg25046772	RP11-69H7.2	5.3e-50
cg27423177	C3AR1	5.37e-50
cg04835284	SEC31B	5.4e-50
cg03502002	GALR1	5.46e-50
cg12072611	TRAV12-3	5.57e-50
cg11328436	HOTAIR_4;HOTAIR_5	5.86e-50
cg06437799	YY1AP1	5.89e-50
cg14849140	RP11-438N5.2	5.93e-50
cg02759725	OC90	6.26e-50
cg20814718	UNC5D	6.26e-50
cg15218995	SPPL2C	6.45e-50
cg25875213	ZFP30;ZNF781	7.08e-50
cg23781075	DEFB128	7.18e-50
cg25562958	AL132709.2;MIR1197;MIR323A;MIR758	7.22e-50
cg00472801	KHDRBS2	7.4e-50
cg17011276	PCDHGB7	7.44e-50
cg04347874	NKX2-1-AS1	8.18e-50
cg01408682	FAM9C	8.24e-50
cg10671066	SLAMF6	8.36e-50
cg06798106	RP11-53M11.5	8.63e-50
cg04424621	HIST1H2BJ	8.79e-50
cg23919924	OR10G8	8.98e-50
cg02818322	MAGEC3	9.3e-50
cg18952796	NPTX2	9.31e-50
cg22791045	OPCML	9.38e-50
cg08697689	SLITRK1	9.79e-50
cg18233405	TSPYL5	9.85e-50
cg24423088	KRTAP8-1	1.03e-49
cg01077058	OTOS	1.12e-49
cg10583119	RNU6-980P;AC011453.3	1.13e-49
cg10182317	CLVS2	1.13e-49
cg10477621	FERD3L	1.14e-49
cg19961545	GPR75-ASB3;GPR75	1.31e-49
cg03329976	SOX17	1.32e-49
cg25378939	CTD-3162L10.5	1.33e-49
cg06400301	OR2T33	1.4e-49
cg07463541	PCDHA3	1.42e-49
cg06042156	RP11-310H4.3	1.45e-49
cg20072171	PTPRG-AS1	1.47e-49
cg14780632	GAL3ST3;SF3B2	1.51e-49
cg25114913	FUT9	1.53e-49
cg02707071	HOXA2	1.54e-49
cg01301382	RP11-454P7.3	1.59e-49
cg24039697	GATA3	1.61e-49
cg10671668	RP11-234B24.4	1.71e-49
cg03013817	RP11-37C7.3	1.75e-49
cg14713139	FAM90A28P	1.91e-49
cg14990644	TSSK1B	1.93e-49
cg10959353	SPHKAP	1.93e-49
cg22152605	FPR2	1.96e-49
cg17098147	SPAG6	2.01e-49
cg00876196	KIR2DL4	2.08e-49
cg01630690	NKX2-1	2.13e-49
cg01031101	NKAPL	2.2e-49
cg09508275	OR8H3	2.23e-49
cg03574723	GPR26	2.29e-49
cg24767131	ECEL1P2	2.3e-49
cg14935646	HOXA9	2.31e-49
cg10610244	SNORD115-23	2.46e-49
cg09471659	ABCB10P4	2.54e-49
cg11725400	OR5AU1	2.83e-49
cg18767920	RP11-322E11.5;AC007998.1	2.92e-49
cg17799287	MIR17;AL162375.1;MIR19A;MIR20A;MIR19B1;MIR92A1	2.95e-49
cg18816826	MT1HL1	2.99e-49
cg11552072	MIR663B	3.22e-49
cg21220965	SNORD115-15	3.27e-49
cg18223379	BPIFB6	3.31e-49
cg02151120	RP11-849H4.4	3.37e-49
cg00144335	Z95704.3	3.38e-49
cg19678968	RP11-716D16.1	3.43e-49
cg02299136	GTF2H2C	3.67e-49
cg17991695	GCM2	3.88e-49
cg05221167	ZNF560;CTC-543D15.3	3.93e-49
cg04160046	AC005176.2	3.93e-49
cg27328211	SNORD115-27	4.11e-49
cg22356339	PAH	4.47e-49
cg22366938	SNORD115-23	4.47e-49
cg24832498	HBE1;AC104389.28	4.56e-49
cg02483701	HOXA9	4.65e-49
cg14509196	SNORD115-43;SNORD115-44	4.84e-49
cg19717640	LRIT2	4.87e-49
cg09147372	MAPK15	4.93e-49
cg01856752	MIR6775	5.05e-49
cg12499211	SH2D2A	5.24e-49
cg17067638	SNORD115-10	5.41e-49
cg26597242	GABRA1	5.47e-49
cg27004195	RNU6-561P	5.69e-49
cg07723365	MCEMP1;CTD-3214H19.16	5.7e-49
cg08970655	OR1L3	5.79e-49
cg11873482	TAC1	5.85e-49
cg09343092	HOXA5	5.93e-49
cg05722504	RP11-227F19.1	6.3e-49
cg03095797	AC130709.1	6.42e-49
cg17741501	RP11-578F21.13	6.49e-49
cg20322837	APLNR	6.56e-49
cg12113101	IQSEC3	6.94e-49
cg17530247	ARIH2	7.22e-49
cg12647861	H2BFWT	7.36e-49
cg23542968	SFTA3	8.36e-49
cg04701034	NID2	8.64e-49
cg01964852	HOXA-AS2	8.65e-49
cg04046669	HORMAD2-AS1;HORMAD2	8.75e-49
cg13916459	ALX1	9.28e-49
cg08610982	NCR3	9.45e-49
cg18970434	AL928742.12	1.03e-48
cg09761121	ANKRD30BL;MIR663B	1.03e-48
cg20312687	DEFB118	1.13e-48
cg24571875	PNLIP	1.15e-48
cg10469791	GRXCR1	1.17e-48
cg16980245	SNORD115-42;SNORD115-43	1.17e-48
cg00080252	AARD	1.17e-48
cg11097433	SORCS1	1.21e-48
cg08523865	AC079154.1;CNTNAP5	1.36e-48
cg09643350	SLC25A51P1	1.49e-48
cg03700449	PAH	1.53e-48
cg01237333	LINC01388	1.53e-48
cg26673012	TBX20	1.63e-48
cg00423453	OR51B6	1.78e-48
cg22134325	NPAS4	1.97e-48
cg17432857	HOXA5	1.99e-48
cg09285525	MIR6775;RP4-536B24.2	2e-48
cg15786900	ALX4	2.13e-48
cg25691167	FERD3L	2.18e-48
cg08776619	HHATL;HHATL-AS1	2.18e-48
cg27639662	RP11-377G16.2	2.33e-48
cg10253847	NKAPL	2.34e-48
cg23156348	TMEM218;KRT18P59	2.35e-48
cg13688329	C9orf84	2.36e-48
cg01777643	RP11-100E13.1	2.36e-48
cg07172334	KRTAP24-1	2.44e-48
cg21931419	SYNDIG1L	2.44e-48
cg02489377	OR1B1;OR1B1	2.5e-48
cg11282657	NPLOC4	2.53e-48
cg21341586	AC019131.1	2.62e-48
cg17295225	OLIG3	2.73e-48
cg07344627	DCAF12L1	2.77e-48
cg26059468	SOX17	2.78e-48
cg01671881	RP11-49G10.3;BPIFA3	2.82e-48
cg08785215	FLNB	3.02e-48
cg12740337	ZSCAN12P1	3.2e-48
cg05304729	MNDA	3.24e-48
cg05708550	KDM3B	3.38e-48
cg09971314	COX11P1	3.45e-48
cg01802121	TRAV5	4.03e-48
cg26344776	SNORD115-40	4.42e-48
cg11859922	GREM2	4.53e-48
cg02341759	RP11-553E24.1;AGBL1	4.65e-48
cg27534912	CD1C	4.74e-48
cg27393162	RP11-154H17.1	4.88e-48
cg04281261	LINC00658;RP5-828H9.1	5.17e-48
cg07999415	RP11-849H4.4	5.21e-48
cg08594218	MIR3185	5.43e-48
cg00730561	SEC31B	5.49e-48
cg16407471	MIR129-2	5.5e-48
cg03900143	ZIC1	5.51e-48
cg00868860	DCD	6.15e-48
cg06966811	OTX2	6.28e-48
cg19643053	HOXA5	6.28e-48
cg22407942	SNORD93	6.55e-48
cg08203284	HOXA4	6.63e-48
cg23891360	TMEM132D	6.73e-48
cg08749443	PLIN1	6.95e-48
cg19547319	LBX1-AS1	6.99e-48
cg12142424	SERPINA10	7.01e-48
cg11297236	PDILT	7.22e-48
cg13747967	CCL22	7.79e-48
cg13408605	SIRPG	8.04e-48
cg22933107	RP11-97O12.3	8.15e-48
cg15001032	DDC	8.64e-48
cg18076399	SNORD115-5	8.88e-48
cg22396979	RP11-706C16.5;GML	9.09e-48
cg10390058	GALR1	9.29e-48
cg18054172	HOXC5	9.56e-48
cg05616355	PANX3	9.65e-48
cg09779576	SNORD115-15	1.01e-47
cg09638704	OR2W5	1.09e-47
cg01911239	PCDHGA5	1.13e-47
cg26881287	LGALS13	1.14e-47
cg08291487	MIR892C;MIR890;MIR888	1.18e-47
cg07740199	CYP4F35P	1.21e-47
cg08194879	CLVS2	1.33e-47
cg08978665	IL32	1.35e-47
cg18692149	CTD-2561J22.5	1.37e-47
cg07496545	SLC25A2	1.43e-47
cg07448060	MAGI2	1.54e-47
cg12227411	SNORD115-30	1.57e-47
cg01323381	HOXA5	1.62e-47
cg01917716	MS4A3	1.65e-47
cg01132653	MIR411;MIR299;AL132709.2	1.66e-47
cg02263813	MT1A	1.73e-47
cg20585530	SIX6	1.74e-47
cg16361947	SNORA62	1.82e-47
cg26024682	MIR670	1.85e-47
cg14273116	Z95704.3	1.92e-47
cg24240626	REG3A	1.93e-47
cg04948906	OR8B12	1.98e-47
cg02281970	CIRBP-AS1	1.99e-47
cg12268637	HOXD12	2.05e-47
cg15692052	HTR2A	2.1e-47
cg24949488	DNTT	2.11e-47
cg01860778	MIR663A	2.21e-47
cg06092815	SPHKAP	2.24e-47
cg14832904	GPR75-ASB3;GPR75	2.29e-47
cg04360793	ELTD1	2.41e-47
cg10514097	AC009108.2	2.43e-47
cg26306893	SNHG11;SNORA71E	2.51e-47
cg19803052	TMEM196	2.63e-47
cg05106869	RP11-388M20.2	2.64e-47
cg18588811	MIR496;MIR377	2.79e-47
cg13219190	SNORD115-14	2.9e-47
cg21847347	CD300LF	2.92e-47
cg19897172	C7orf73	2.97e-47
cg15593510	OR10T2	2.98e-47
cg03300268	DEXI	2.98e-47
cg23049458	L1TD1	3.1e-47
cg18438944	MT1A	3.11e-47
cg26095658	FIGLA	3.13e-47
cg16736018	RP11-66D17.3	3.26e-47
cg08370178	CTD-2035E11.4	3.27e-47
cg21040360	TSSC1;TRAPPC12	3.29e-47
cg15016120	DCD	3.59e-47
cg05218035	SNORD115-19;SNORD115-20	3.71e-47
cg21206652	CCDC166	3.93e-47
cg13249591	S100A10;AL591893.1	3.99e-47
cg20302133	KCNA3	4.09e-47
cg20008332	LINC01248;AC108025.2;SOX11	4.19e-47
cg26186727	RP11-676J15.1	4.2e-47
cg12377139	SPAG6	4.22e-47
cg25285053	GPR31	4.29e-47
cg24863335	NETO1;RP11-676J15.1	4.3e-47
cg21246665	SERPINA10	4.34e-47
cg16180796	AC005082.12	4.53e-47
cg12066770	FAM135B	4.54e-47
cg01110759	MT1A	4.6e-47
cg00175487	MIR299;AL132709.2;MIR1197;MIR323A	4.63e-47
cg05533037	KRTAP7-1	5.15e-47
cg18448581	RP11-676J15.1	5.15e-47
cg26482893	KCNE5	5.53e-47
cg20253468	CTD-2291D10.3	5.53e-47
cg06051411	ATP5H	5.59e-47
cg11068946	NKX6-2	5.59e-47
cg03817667	VSTM2A	5.68e-47
cg03494634	OR7G3	5.86e-47
cg20939084	ZIC1	6.47e-47
cg00515457	CTC-523E23.14;CTC-523E23.15;CTC-523E23.6	6.76e-47
cg27391267	ZSCAN1	6.82e-47
cg16578568	C16orf54	6.96e-47
cg06712013	SPATS2	7.03e-47
cg14294096	MIR670	7.3e-47
cg08870893	AARD	7.54e-47
cg14428146	NKX2-6;RP11-175E9.1	8.6e-47
cg14568196	EGFL7	8.63e-47
cg03707183	PAPOLB	8.98e-47
cg27664407	C16orf89	9e-47
cg02812891	ECEL1P2	9.58e-47
cg10019018	RP11-357K6.1	9.7e-47
cg24381587	OR6N1	9.79e-47
cg15231462	OR2G3	1.12e-46
cg02932321	DEFA6	1.15e-46
cg02631468	VSX1	1.18e-46
cg10440696	OR52N1	1.2e-46
cg09313482	ENPP2	1.23e-46
cg05064002	FCHO1	1.23e-46
cg17107893	CTD-3162L10.5	1.26e-46
cg19474983	OR5H1	1.32e-46
cg00688447	RP11-53M11.5	1.34e-46
cg02965895	OR51L1	1.34e-46
cg00905524	HOXA10-AS	1.34e-46
cg13314145	NPTX2	1.35e-46
cg06506966	ZNF677	1.4e-46
cg17382459	NLRP11;NLRP4	1.41e-46
cg04332534	ZNF529	1.45e-46
cg05967403	GSX1	1.46e-46
cg25922610	OCM	1.46e-46
cg04744713	MROH5	1.5e-46
cg15626828	PEBP1P3	1.62e-46
cg00471000	BPIFB6	1.66e-46
cg08203849	RP11-59C5.3	1.69e-46
cg23842255	NEFH	1.69e-46
cg18930012	LRIT1	1.7e-46
cg05235171	TMPRSS4-AS1	1.73e-46
cg12217625	C1orf204	1.74e-46
cg06301178	CTD-2014E2.5;CTD-2014E2.7	1.76e-46
cg05602648	COG2	1.76e-46
cg08656816	CCL5	1.84e-46
cg00275828	KRTAP2-4	1.86e-46
cg09798801	TERF1P3	1.89e-46
cg09140665	OR10A3	1.89e-46
cg08786003	FCRL3	1.89e-46
cg06155641	GLT6D1	2e-46
cg10303487	DPYS	2.07e-46
cg08697847	PIK3R6	2.15e-46
cg07280593	LILRA1	2.18e-46
cg04049033	RILP	2.18e-46
cg02022102	HOXA-AS3	2.22e-46
cg21870274	OR4F5	2.23e-46
cg15347189	SST	2.26e-46
cg23536681	RP11-2H3.7	2.32e-46
cg25330366	VPREB1	2.35e-46
cg06896909	TMEM196	2.39e-46
cg00571033	MIR124-1	2.42e-46
cg14691529	HOTAIR_2;HOTAIR_3	2.63e-46
cg04988978	MPO	2.66e-46
cg11312896	ZSCAN1	2.73e-46
cg02304033	NPS	2.78e-46
cg04923174	OR10X1;OR10X1	2.85e-46
cg00467296	OR51A7	2.87e-46
cg02643054	HOXA10-AS	2.99e-46
cg08331163	OR4D11	3.04e-46
cg16491960	CCNJP1	3.04e-46
cg23294090	FAM135B	3.37e-46
cg01474260	CCT8L2	3.53e-46
cg01184591	GUSBP10	3.53e-46
cg01530803	SDC4P	3.63e-46
cg18186343	MIR770	3.64e-46
cg10243196	RP11-255H23.2;RPSAP58	3.66e-46
cg04986336	ACY3	3.74e-46
cg24428232	MIR921	3.8e-46
cg15564098	RP1-170O19.17;EVX1	3.87e-46
cg25388528	KRTAP6-1;KRTAP20-1	3.89e-46
cg20704654	LINC00028	3.97e-46
cg15343224	RP11-627G23.1	4.07e-46
cg11582484	SNORD115-42	4.17e-46
cg26892635	OR1F1	4.23e-46
cg24621437	SORCS1	4.38e-46
cg17208360	SNORD115-37;SNORD115-38	4.72e-46
cg20385970	SNORD115-33	4.88e-46
cg23501610	PRAMEF11	5.05e-46
cg24826867	IRF8	5.17e-46
cg17032564	RP11-175K6.2	5.18e-46
cg18630667	ZNF529	5.2e-46
cg12610471	SPAG6	5.22e-46
cg16294013	PDE4B	5.68e-46
cg22399133	CRYGD	5.74e-46
cg12951849	PIEZO2	5.95e-46
cg12238343	RXFP3	6.06e-46
cg27160968	AP001453.1	6.4e-46
cg20261167	SPP1	6.58e-46
cg09842118	RNASE3	6.66e-46
cg03770907	NLRP13	6.9e-46
cg15382538	RP11-79P5.3	7.12e-46
cg19772066	CTC-512J12.4;ZNF229	7.5e-46
cg03440588	FOXD2-AS1;FOXD2	7.69e-46
cg21052656	AIP	7.85e-46
cg11256214	FAM222A-AS1	7.94e-46
cg25835179	ACY3	8.09e-46
cg20984085	ZNF582;ZNF582-AS1	8.16e-46
cg09474331	TTYH1	8.33e-46
cg15186181	SOX17	8.34e-46
cg08276328	MAGEC1	8.4e-46
cg16790794	NKX2-1-AS1	9.06e-46
cg23302570	NXPH2	9.07e-46
cg23944251	GPR158-AS1	9.18e-46
cg26456399	SNORD115-7;SNORD115-8	9.58e-46
cg26613586	RP4-798A10.4	9.8e-46
cg27621129	AC003986.6	1.03e-45
cg18456942	DEFB118	1.04e-45
cg13309012	MIR155	1.04e-45
cg02164574	HOXD9	1.05e-45
cg26513304	KCNIP1	1.07e-45
cg11850773	ADCYAP1	1.18e-45
cg26199241	TBX4	1.19e-45
cg00933411	DLC1	1.29e-45
cg25137968	RP11-439A17.10;HIST2H2BA;RP11-439A17.4	1.34e-45
cg22417613	RNU6-1272P	1.35e-45
cg09676013	HLA-DPB2	1.35e-45
cg26591982	SLC25A1P3	1.39e-45
cg27342801	REG3A	1.39e-45
cg11579116	EMR4P	1.41e-45
cg09656389	PAX6	1.55e-45
cg22455694	HOXD10	1.61e-45
cg19254119	ZNF560;CTC-543D15.3	1.63e-45
cg00883837	OR2T6	1.66e-45
cg04181701	RP11-476I15.6	1.69e-45
cg04604142	LUC7L3	1.72e-45
cg21127068	ZIC4	1.9e-45
cg27149471	OR5T1	1.91e-45
cg22207732	ABCG5;ABCG8	2.05e-45
cg03613782	RP11-578F21.13	2.1e-45
cg12234272	TFF2	2.11e-45
cg22352800	MIR10B;AC009336.19;HOXD4	2.27e-45
cg10662314	HOXC6;MIR196A2	2.3e-45
cg19196335	HOXA5	2.39e-45
cg09744759	RP11-1275H24.1	2.43e-45
cg13694927	HOXA5	2.43e-45
cg24366702	ZNF132;CTD-2619J13.19	2.44e-45
cg12538674	HOXA-AS2	2.46e-45
cg13338350	ZNF611	2.46e-45
cg18530645	CTD-2192J16.22	2.57e-45
cg22517388	CARTPT	2.75e-45
cg13967888	RP11-307E17.8	2.77e-45
cg22512438	TRH	2.8e-45
cg25696807	MIR891A	2.84e-45
cg04540406	SHCBP1	3.04e-45
cg15708153	ZSCAN5A;AC006116.21;ZNF542P	3.18e-45
cg11816081	RP11-1079K10.5	3.21e-45
cg18257955	SNORD115-22	3.3e-45
cg24640676	KRTAP10-9	3.5e-45
cg21185686	PCDHGA12	3.53e-45
cg00425918	RP11-175E9.1	3.54e-45
cg19802477	LILRA4	3.63e-45
cg17738194	GK2	3.8e-45
cg09745307	AGXT2	4.04e-45
cg19521511	ZNF716	4.31e-45
cg18715665	LIG1;ZNF114	4.56e-45
cg03701795	CD1E	4.58e-45
cg23085662	CDH20	4.67e-45
cg24567424	FAM155A	4.78e-45
cg27353143	ZNF573;CTD-2554C21.2	4.84e-45
cg17014035	SLC25A51P1	4.95e-45
cg09470142	C2orf88	5e-45
cg13939859	BARHL2	5.21e-45
cg15847936	IGHV4-28	5.4e-45
cg15842276	MTNR1B	5.43e-45
cg12304520	PCDHGA12	5.57e-45
cg20892260	NKX2-6;RP11-175E9.1	5.72e-45
cg22374057	PIEZO2	6.07e-45
cg10006428	OR2T27	6.25e-45
cg01533082	RP11-349A22.2	6.53e-45
cg04625975	HNRNPA3P1	6.85e-45
cg19194373	EDN3	6.9e-45
cg10384725	AP000438.4	7.05e-45
cg21130374	MX2	7.09e-45
cg20765441	SLC17A2	7.14e-45
cg16822540	TNMD	7.25e-45
cg00718513	IGKV7-3	7.7e-45
cg23941599	FEM1C	7.92e-45
cg22405653	KRTAP21-1	8.13e-45
cg25514273	ATXN8OS	8.13e-45
cg26019295	HOXC4;RP11-834C11.14	8.55e-45
cg09725213	PABPC5-AS1;PABPC5	8.59e-45
cg25937451	KRTAP10-5	8.95e-45
cg15186616	DLGAP2	9.01e-45
cg19250571	OR51S1	9.17e-45
cg17283453	ZNF177	9.43e-45
cg13692446	LINC00403	9.53e-45
cg16536329	RP11-281O15.8;ZNF454	9.6e-45
cg09011231	ANKRD30BL;MIR663B	9.68e-45
cg00919411	ZBED9	9.81e-45
cg17357062	FCN1	9.86e-45
cg26249873	GPR158-AS1	1e-44
cg16185834	VSX1	1e-44
cg23149881	IL1B	1.01e-44
cg04704294	PDE4B	1.03e-44
cg01574663	HS3ST2	1.1e-44
cg05130485	CASP8	1.11e-44
cg03166753	RP3-503A6.2;DNAH8	1.13e-44
cg27555582	ABCC9	1.13e-44
cg11804789	CST7	1.18e-44
cg08488841	KBTBD12	1.21e-44
cg07717903	PCDHGA6	1.26e-44
cg02106682	HOXA5	1.27e-44
cg25200152	RP11-495P10.4	1.37e-44
cg15066416	CTD-2026D20.2	1.41e-44
cg18507379	PCDHGB6	1.43e-44
cg08980382	CTD-2014E2.5;CTD-2014E2.7	1.59e-44
cg07788092	ZNF177	1.6e-44
cg19267861	MIR124-3	1.61e-44
cg02705035	SNORD115-24	1.63e-44
cg11638117	SOX3	1.64e-44
cg09176539	RP11-707M1.1	1.65e-44
cg20778451	RP11-281O15.8;ZNF454	1.67e-44
cg02291164	RP11-112J1.3	1.73e-44
cg17165841	AC010731.4	1.73e-44
cg20653075	MIR124-2	1.8e-44
cg15428904	RP4-806M20.4;MIR296;MIR298	1.83e-44
cg23073467	RNU6-1041P;MIR516A2;CTC-339O9.1;AC011453.2	1.92e-44
cg11909748	ZNF578	2.02e-44
cg13403695	SNORD115-14	2.03e-44
cg10661615	PRLHR	2.06e-44
cg20578258	RP11-690P14.4	2.15e-44
cg02381385	SIGLEC12	2.3e-44
cg04866380	PPP1R17	2.32e-44
cg18022224	HOXD12	2.36e-44
cg24145481	KRTAP25-1	2.36e-44
cg03264414	PAEP	2.46e-44
cg07166654	KRT87P	2.49e-44
cg15400655	Z95704.3	2.53e-44
cg13451431	RP11-183G22.1	2.58e-44
cg04875162	PABPC5-AS1;PABPC5	2.6e-44
cg18805066	HOTAIRM1;HOTAIRM1_1	2.65e-44
cg02790260	LRIT2	2.75e-44
cg02969706	LINC01105	2.76e-44
cg17743250	RP11-348J12.2;CYP26C1	2.8e-44
cg20268341	DNAJB8-AS1	2.89e-44
cg27403265	HS3ST2	2.96e-44
cg25537993	ZSCAN1	2.99e-44
cg25249068	BFSP2	3.01e-44
cg00357971	COL20A1	3.09e-44
cg12937141	H2BFWT	3.54e-44
cg08812189	ZIC1	3.7e-44
cg01693284	OR1L3	3.72e-44
cg06419850	RP11-81A22.4	3.77e-44
cg26349048	OR5W2	4e-44
cg16228380	LINC00861;SOD1P3	4.07e-44
cg22647407	ZNF582;ZNF582-AS1	4.29e-44
cg15794859	TARID	4.42e-44
cg25825488	ITGA8	4.44e-44
cg12944573	OPRM1	4.61e-44
cg00305947	MC5R	4.68e-44
cg21546211	ATF4P4;RP11-667M19.5	4.77e-44
cg23004160	CTD-2561J22.5	4.8e-44
cg23037403	RP11-281O15.8;ZNF454	4.83e-44
cg07681935	HAND2	4.84e-44
cg23619399	RP11-52L5.6	4.93e-44
cg09904358	RP11-183E9.2	5.24e-44
cg05496543	RP11-449J10.1	5.88e-44
cg07392307	SFTPA2	5.88e-44
cg08174890	MIR548I2	5.91e-44
cg00181125	ABCC9	5.95e-44
cg24123311	LIG1;ZNF114	6.03e-44
cg16812893	KRTAP15-1	6.08e-44
cg12123983	SNAPC1	6.12e-44
cg02919960	HOXA3;RP1-170O19.22;RP1-170O19.23	6.24e-44
cg23130075	ACY3	6.32e-44
cg01154966	TRPC4AP	6.46e-44
cg01499197	CDX2	6.46e-44
cg02138218	TNN	6.51e-44
cg01954585	RP11-158M2.2	6.56e-44
cg02818572	GOLGA6L2	6.7e-44
cg23106865	MTRNR2L6	6.76e-44
cg00963169	ELAVL4	7.07e-44
cg04105511	HOXC4;RP11-834C11.14	7.23e-44
cg10508416	SLC6A12	7.85e-44
cg02706018	HOXA-AS3	7.97e-44
cg01750780	KLF2P3	8.36e-44
cg20718350	PAH	8.54e-44
cg08616061	PCDHGA6	8.57e-44
cg21747271	AIP	8.76e-44
cg24116870	ADAMTS20	8.81e-44
cg15084269	STX6	8.85e-44
cg10643916	RP11-253M7.4;RP11-279F6.1	8.88e-44
cg04910970	PRDM13	9.04e-44
cg04351905	OLIG1	9.46e-44
cg17827767	LRIT1	9.62e-44
cg15131258	RP11-49G10.3;BPIFA3	9.63e-44
cg17895907	MIR514A3	9.7e-44
cg16072777	Y_RNA	1.02e-43
cg07532354	SCGB1D1	1.03e-43
cg13753460	MIR382;MIR134;AL132709.5;MIR485;MIR323B	1.04e-43
cg26687173	WDR88	1.06e-43
cg07730329	PCDHGA12	1.09e-43
cg04168853	AC016582.2	1.19e-43
cg19709670	COL6A4P2	1.22e-43
cg26170660	GPX5	1.22e-43
cg14266527	MAB21L2	1.24e-43
cg04354077	PROKR2	1.24e-43
cg12011136	PAPOLB	1.26e-43
cg02763101	ZNF582;ZNF582-AS1	1.27e-43
cg02077084	OR2T6	1.3e-43
cg02672759	IFNL4	1.39e-43
cg02427831	SIGLEC8	1.42e-43
cg00983948	CACYBPP3	1.42e-43
cg21273275	RP11-10N16.3	1.5e-43
cg00241002	RP13-16H11.7	1.52e-43
cg25570913	LINC00403	1.6e-43
cg08271804	ZNF492	1.63e-43
cg10767141	HOXA11;HOXA11-AS1_1;HOXA11-AS1_2;HOXA11-AS1_3;HOXA11-AS1_4	1.67e-43
cg18369913	OR4C46	1.68e-43
cg11624728	SLC7A14	1.68e-43
cg07049592	HOXA5	1.71e-43
cg07002201	FUT9	1.8e-43
cg01577992	DPY19L2P2	1.83e-43
cg07428782	AA06;RP11-31I22.4	1.84e-43
cg17322443	KMT2C;FABP5P3	1.84e-43
cg17149644	ST3GAL4-AS1;ST3GAL4	1.97e-43
cg01566235	NKX2-1	2.05e-43
cg07852825	GHSR	2.08e-43
cg20323571	MIR488	2.28e-43
cg14752336	SORCS3	2.29e-43
cg03348397	RP11-1070A24.2	2.3e-43
cg03068446	TRIM49D1;TRIM49D2	2.34e-43
cg11371231	OR8K5	2.34e-43
cg01425666	RP11-1275H24.1;RP11-1275H24.3	2.36e-43
cg15874877	PCDHGA11	2.39e-43
cg04071270	CH17-140K24.1	2.47e-43
cg04805065	MIR6777;MIR33B	2.51e-43
cg22861116	PCDHGA7	2.56e-43
cg17101296	AF186192.1;AF186192.5	2.79e-43
cg11248896	HOXD-AS2	2.89e-43
cg01817009	LCAT	2.91e-43
cg15042473	H2BFM	3.14e-43
cg19426522	EOMES	3.17e-43
cg06968788	SDC4P	3.2e-43
cg09085792	MIR944	3.42e-43
cg02452944	PCDHGA12	3.58e-43
cg09137696	MT1A	3.59e-43
cg12706330	GHITM	3.73e-43
cg06866232	OR51L1	3.96e-43
cg19507267	RP11-59E19.4;LINC00488	3.96e-43
cg15967709	ZBED9	4.08e-43
cg03564620	MYH6	4.13e-43
cg12456714	MARCH11;RP11-19O2.2	4.22e-43
cg02344833	ZSCAN1	4.31e-43
cg12403132	TIMM17BP1	4.41e-43
cg26462595	MRGPRG	4.5e-43
cg08564375	SNORD115-12;SNORD115-13	4.59e-43
cg20334313	SNTG1	4.72e-43
cg15272362	VSX1	4.75e-43
cg00423153	SPHKAP	4.87e-43
cg01847754	TMEM257	4.9e-43
cg21042456	UNCX	5.53e-43
cg12619165	LINC00861;SOD1P3	5.54e-43
cg09265955	RP11-403I13.5	5.59e-43
cg25993718	CBLN4	5.98e-43
cg24977541	SLC7A14	6.22e-43
cg00241941	RP11-760D2.1	6.36e-43
cg21595968	AF013593.1	6.54e-43
cg14569837	OR5AS1	6.6e-43
cg17551002	OR6Y1	6.86e-43
cg23759189	AP003025.2	6.96e-43
cg21297772	SLC5A9	6.96e-43
cg11391201	ALX4	7.12e-43
cg03803071	ZNF43	7.27e-43
cg15235798	SOX1	7.33e-43
cg27353346	RP11-797E24.3	7.5e-43
cg07978472	TMEM155	7.67e-43
cg01567771	TRAV3	8.12e-43
cg21000072	TP73	8.56e-43
cg05109049	EVI2B	8.93e-43
cg17076890	PTF1A	9.21e-43
cg13885504	KLF2P4	9.39e-43
cg04456892	OR10A4	9.69e-43
cg14646244	SLC26A4	9.71e-43
cg04807594	RPL38P1;AGTR1	9.87e-43
cg08736522	U1	9.96e-43
cg25428553	AC013402.5	1.03e-42
cg05210558	AP003025.2	1.06e-42
cg22747516	NLRP11	1.06e-42
cg06571387	HOXD12	1.06e-42
cg27443071	RNA5SP175	1.06e-42
cg04439215	KCTD4	1.07e-42
cg06264653	SNORD115-13;SNORD115-14	1.09e-42
cg06613765	PIK3R6	1.09e-42
cg15722679	SIRPG	1.11e-42
cg15084543	ELTD1	1.12e-42
cg19811087	BARHL2	1.13e-42
cg24031355	SPAG6	1.14e-42
cg02736395	RNA5SP77	1.15e-42
cg07637239	RP11-501J20.3;KCNK18	1.17e-42
cg03906075	SNORD93	1.18e-42
cg00206542	OR5A1	1.19e-42
cg08596532	CTD-2247C11.1;LINC01020	1.21e-42
cg16457786	ADCYAP1	1.23e-42
cg26383972	HTR2C	1.23e-42
cg14144025	LINC01097	1.23e-42
cg06785999	SIX6	1.25e-42
cg03661324	CTNNA2	1.27e-42
cg10103000	ERVMER61-1	1.31e-42
cg16659728	MRGPRD	1.34e-42
cg05693204	CTD-2194D22.5	1.35e-42
cg00118989	TRPC7	1.37e-42
cg01656244	MIR124-2HG	1.41e-42
cg10292376	KRT72;KRT73-AS1	1.42e-42
cg01195861	POP5	1.43e-42
cg24199834	POU4F2;AC093887.1	1.44e-42
cg22130262	MOS	1.45e-42
cg08886154	PAX4	1.49e-42
cg00070680	DGKI	1.5e-42
cg07895132	RP11-1094M14.8	1.63e-42
cg12924224	HNRNPA1P21	1.65e-42
cg19606290	MIR520B;MIR518B	1.71e-42
cg13046832	RP11-966I7.2	1.73e-42
cg09232851	UBQLNL	1.84e-42
cg22743884	DEFB135	1.87e-42
cg14638883	T	1.89e-42
cg27188827	NLRP11;NLRP4	1.94e-42
cg16638540	ZNF135	1.95e-42
cg26638505	SRD5A2	1.97e-42
cg07045857	RP11-272P10.3	1.98e-42
cg21907579	TBX5;TBX5-AS1	2.06e-42
cg06203976	CADM3	2.08e-42
cg12418535	EN1	2.16e-42
cg09256941	GPR139	2.2e-42
cg11264863	SEMG1	2.21e-42
cg01509243	RP11-982M15.7	2.24e-42
cg11420883	PAPOLB	2.33e-42
cg01807946	RP13-516M14.8	2.39e-42
cg14440205	MIR379;MIR411	2.45e-42
cg13324546	NKX2-6;RP11-175E9.1	2.45e-42
cg06530558	UNC13C	2.57e-42
cg22660933	HOXB1	2.58e-42
cg13672200	HOXC9	2.59e-42
cg26309134	ZSCAN5A;AC006116.21;ZNF542P	2.59e-42
cg16787600	SORCS3	2.62e-42
cg18458509	SLC22A18	2.71e-42
cg24629972	POTEA	2.75e-42
cg14502484	SLC6A3	2.75e-42
cg22750001	MPEG1	2.82e-42
cg26371705	MIRLET7A3	2.85e-42
cg21899542	ATP5G1P1	2.93e-42
cg25451456	OR56A3	2.93e-42
cg17367472	KRTAP11-1	2.94e-42
cg02582191	OR6B2	2.94e-42
cg12074025	ZNF671	3e-42
cg02022733	PCDHGC4	3.09e-42
cg16555417	RP11-115D7.3	3.11e-42
cg27298639	SPANXN4	3.12e-42
cg00791712	C10orf120	3.13e-42
cg21444693	ZNF418	3.16e-42
cg03530754	TMEM132C	3.18e-42
cg14565725	TBX15	3.21e-42
cg12921750	NETO1;RP11-676J15.1	3.22e-42
cg07281879	WT1-AS_6;WT1-AS_7	3.3e-42
cg02765820	C3orf22	3.41e-42
cg05099508	SPAG6	3.42e-42
cg08802513	RP11-161P17.2;POM121L13P	3.49e-42
cg04326348	RP11-338O1.2	3.5e-42
cg02478023	MIMT1;MIMT1_1	3.61e-42
cg10569694	RNF216P1	3.7e-42
cg12878228	PRSS1	3.75e-42
cg03039990	MIR770	3.82e-42
cg12623302	ZSCAN12P1	3.94e-42
cg18451814	OTX2;OTX2-AS1	4.12e-42
cg27455606	SNORD115-6	4.22e-42
cg03146949	ZSCAN5A;AC006116.21;ZNF542P	4.55e-42
cg03365311	MIR129-2	4.74e-42
cg14742937	ADAM5	4.77e-42
cg03100024	ZNF574	5.05e-42
cg08146323	ZNF835;AC007228.5	5.14e-42
cg18128969	NCAM2	5.19e-42
cg02438781	ZNF729	5.21e-42
cg21349914	CTNNA2	5.24e-42
cg18293662	EOMES	5.24e-42
cg16678925	OR1A2	5.3e-42
cg07878486	ZNF132;CTD-2619J13.19	5.32e-42
cg09628216	SNORD115-27	5.37e-42
cg11695358	MAPK15	5.37e-42
cg25153233	RP4-705O1.1	5.37e-42
cg09520393	DRD5	5.41e-42
cg16541653	ADAM21P1	5.58e-42
cg02587316	ZNF529	5.62e-42
cg24843380	RP11-281O15.8;ZNF454	5.92e-42
cg16408815	RP4-801G22.3	5.97e-42
cg26822097	TPTEP1	6.09e-42
cg05323533	RP11-227F19.1;RP11-227F19.2	6.13e-42
cg18315861	OR2T11	6.25e-42
cg19659741	ADAM5	6.19e-42
cg24496841	AC003986.6	6.23e-42
cg15058253	RP11-545G3.2	6.3e-42
cg19754554	PDE4B	6.59e-42
cg04961235	PAPOLB	6.68e-42
cg23741759	LINC01519	7.04e-42
cg23176663	IGHG4	7.04e-42
cg25247290	WT1-AS_7;WT1-AS_8	7.07e-42
cg15540820	EOMES	7.17e-42
cg24589459	BOLL	7.8e-42
cg18291941	MIR663A	8.04e-42
cg10397678	LINC00605	8.16e-42
cg07303143	KIAA1143;KIF15	8.41e-42
cg14270857	HPSE2	8.42e-42
cg01208318	IGHJ6;IGHJ3P;IGHJ5	9.31e-42
cg19931902	DEFB129	9.47e-42
cg20450471	ZBED9	9.69e-42
cg24933157	FABP1	9.78e-42
cg07382920	TP73	9.8e-42
cg10262052	RP11-44K6.2	1.03e-41
cg12810084	HOXA11;HOXA11-AS1_1;HOXA11-AS1_2;HOXA11-AS1_3;HOXA11-AS1_4	1.06e-41
cg08241694	DDC	1.07e-41
cg20332645	NKX1-1	1.09e-41
cg05865548	MIR543;MIR495	1.11e-41
cg24389585	HOXA5	1.14e-41
cg19870512	RP11-234B24.4	1.18e-41
cg21151432	ADCY3	1.19e-41
cg00078513	SNORD115-40	1.2e-41
cg20157753	IL1B	1.21e-41
cg00088885	SPP1	1.22e-41
cg23994112	RP11-936I5.1	1.23e-41
cg03168749	OR8B12	1.27e-41
cg16606320	RP11-345F18.1	1.29e-41
cg26288806	ACY3	1.37e-41
cg08333333	ZNF835;AC007228.5	1.39e-41
cg12530021	SIGLEC12	1.41e-41
cg12581241	TPM3P9;ZNF761	1.5e-41
cg01295203	PRDM14	1.51e-41
cg08464190	CBLN1	1.51e-41
cg09857577	C7orf72	1.6e-41
cg23792952	SNORD115-20;SNORD115-21	1.62e-41
cg19017293	RP13-516M14.10	1.64e-41
cg17104151	C1QC	1.69e-41
cg12091642	SALRNA1	1.71e-41
cg05803237	MTNR1B	1.78e-41
cg15990724	NR1H4	1.78e-41
cg00246301	NMS	1.85e-41
cg00374101	CNBD1	1.86e-41
cg03012854	RFPL1	1.88e-41
cg05422029	XXbac-BPGBPG24O18.1	2e-41
cg08363794	HOXD9	2.03e-41
cg19809865	FSCB;RP11-163M18.1	2.06e-41
cg02286091	BHMT	2.09e-41
cg23063647	ZNF876P	2.09e-41
cg13655303	PCK1	2.1e-41
cg18780412	PEX5L	2.11e-41
cg18249580	RP11-32K4.1	2.2e-41
cg03019112	AL132709.4;MIR487A	2.24e-41
cg10961186	KBTBD12	2.26e-41
cg06305609	FAM129C	2.29e-41
cg24599434	GHSR	2.38e-41
cg02582957	AC013733.3	2.47e-41
cg17463145	MAGI2	2.52e-41
cg12085619	OR2T3	2.53e-41
cg03441250	MIR1253	2.58e-41
cg27539480	HOXA-AS2	2.62e-41
cg00298977	LELP1	2.63e-41
cg00564862	OR7E24	2.76e-41
cg26680675	AZGP1	2.79e-41
cg06884882	RNU5F-1	2.81e-41
cg12445786	RP11-320A16.1	2.92e-41
cg15842884	GPCPD1	3.14e-41
cg19848629	MIR124-2HG	3.18e-41
cg05020604	ZNF529	3.21e-41
cg21113740	ELTD1	3.26e-41
cg22238692	CST4	3.48e-41
cg13372231	UBQLN3	3.51e-41
cg00548268	NPTX2	3.59e-41
cg19865770	C1orf140	3.96e-41
cg01165362	OR14I1	3.96e-41
cg03087912	RP11-53M11.5	4.05e-41
cg01669948	KCNK16	4.08e-41
cg05891548	CEACAM4	4.09e-41
cg11788523	ZNF418	4.2e-41
cg00769810	RP11-301M17.1	4.28e-41
cg24854681	MIR25;MIR93;MIR106B	4.3e-41
cg21988972	AFF3	4.33e-41
cg00666640	OR2T12	4.35e-41
cg17796010	MIR663A	4.35e-41
cg20380768	RP11-2E11.5;MEST;MESTIT1_1	4.37e-41
cg11555228	ZNF431	4.39e-41
cg08107689	AC055876.1;PDCD6IPP2	4.41e-41
cg02379079	LBP	4.47e-41
cg15641789	ZNF100	4.75e-41
cg08245989	AC007436.1	4.82e-41
cg02721374	OR1D2	4.98e-41
cg16697438	NPFFR1	5e-41
cg02165355	RP11-281O15.8;ZNF454	5.06e-41
cg01749491	EVX2	5.07e-41
cg11116300	MIR655	5.2e-41
cg26023912	HOXA5	5.52e-41
cg05572621	KRTAP6-2;KRTAP22-1	5.65e-41
cg14054990	KRTAP19-5	5.74e-41
cg06572465	PCDHGA11	5.89e-41
cg27217253	CCDC42	5.93e-41
cg27294983	IRF9	6.11e-41
cg02847037	ZDHHC20	6.17e-41
cg10172584	YJEFN3	6.24e-41
cg00599219	MEFV	6.27e-41
cg20849025	MPEG1	6.39e-41
cg08530237	ABCC9	6.54e-41
cg22746058	PTF1A	6.61e-41
cg00660167	RP13-516M14.10	6.67e-41
cg08217024	MDGA2	6.76e-41
cg26522894	TMEM132D	6.88e-41
cg15926004	SERTAD4-AS1	7.04e-41
cg20798152	CARTPT	7.09e-41
cg23170057	FAM71C	7.12e-41
cg23839136	WBSCR17	7.14e-41
cg25800765	ALX1	7.18e-41
cg05046377	OR51A7	7.29e-41
cg03760839	TBX15	7.4e-41
cg27107970	C17orf70	7.58e-41
cg12520549	AC009487.4;AC009487.5;SLC4A10	7.61e-41
cg01436998	ZNF573;CTD-2554C21.2	7.79e-41
cg08495115	GREM1	7.81e-41
cg03130530	AC021021.2	8.22e-41
cg10055566	NKAPL	8.45e-41
cg05812269	RIOK3	8.47e-41
cg15394142	RP11-366L20.2	8.5e-41
cg23400451	MYH4	8.7e-41
cg01515534	CTD-2575K13.6	8.76e-41
cg07891737	MIR517A;MIR519D	8.94e-41
cg09554951	KCNQ1DN;KCNQ1DN	9.09e-41
cg25901381	HOXA11;HOXA11-AS1_1;HOXA11-AS1_2;HOXA11-AS1_3;HOXA11-AS1_4;HOXA11-AS1_5	9.12e-41
cg12628075	OR14J1	9.25e-41
cg21527708	CHIAP2	9.41e-41
cg02610222	POU4F2;AC093887.1	9.48e-41
cg13916740	ZNF582;ZNF582-AS1	9.49e-41
cg01202519	SLC25A1P1	9.55e-41
cg18417954	CTD-2587H24.4	9.77e-41
cg17104824	MIR10B;AC009336.19;HOXD4	9.79e-41
cg11785183	SLC44A4	1.07e-40
cg00422699	CTD-2192J16.22	1.08e-40
cg24119869	KIR3DX1	1.19e-40
cg18568589	ZNF560;CTC-543D15.3	1.21e-40
cg27029821	PRDM14	1.22e-40
cg19718882	WT1;WT1-AS_3;WT1-AS_6	1.23e-40
cg02325250	CSF2	1.28e-40
cg03446636	LINC00466	1.3e-40
cg18612627	GRIN2B	1.3e-40
cg16255697	MIR1911	1.31e-40
cg05099708	CBFA2T3	1.32e-40
cg24891312	PRB1	1.34e-40
cg27665659	AP1S1	1.36e-40
cg24520479	RP11-580J4.1	1.39e-40
cg04645914	ZNF350-AS1	1.41e-40
cg02707176	PCDHGA11	1.42e-40
cg27040525	SIGLEC8	1.43e-40
cg25879561	SNORD115-36;SNORD115-37	1.43e-40
cg11199639	ADAM5	1.49e-40
cg26727488	RP11-758N13.1	1.5e-40
cg17306747	SLC6A3	1.53e-40
cg23016129	SPAG6	1.56e-40
cg11671115	GRID1-AS1	1.57e-40
cg08070327	HOXA5	1.61e-40
cg23213278	TRO	1.62e-40
cg05774699	HOXA5	1.65e-40
cg26709300	RP11-455F5.3	1.74e-40
cg05845376	SLC25A2	1.74e-40
cg05513274	LINC01234	1.75e-40
cg18452695	CTC-543D15.3	1.76e-40
cg22199080	AGAP2	1.8e-40
cg07224726	AQPEP	1.8e-40
cg18787401	ZSCAN5A;AC006116.21;ZNF542P	1.81e-40
cg27416372	ZIC1	1.85e-40
cg25429719	CRYGD	1.97e-40
cg18770739	OR10P1	2.08e-40
cg03916909	NKX2-2-AS1	2.1e-40
cg09269866	FOXD2-AS1;FOXD2	2.1e-40
cg21636683	SLC25A2	2.15e-40
cg18617005	PCDHGB6	2.17e-40
cg18582824	AC079154.1;CNTNAP5	2.21e-40
cg13445796	DBX1	2.24e-40
cg17204652	ECEL1P2	2.26e-40
cg06790305	KRTAP19-8	2.27e-40
cg21243589	FABP1	2.34e-40
cg11174847	NNAT	2.5e-40
cg07191657	MIR1265	2.55e-40
cg27480913	OR52L1	2.55e-40
cg13491724	OR1B1;OR1B1	2.6e-40
cg03856044	APCS	2.6e-40
cg08565979	AC006116.14	2.62e-40
cg26857670	HOXA11;HOXA11-AS1_1;HOXA11-AS1_2;HOXA11-AS1_3;HOXA11-AS1_4;HOXA11-AS1_5	2.64e-40
cg10403441	CYP2A7P1	2.65e-40
cg11036833	CDO1	2.68e-40
cg19998432	OR1B1;OR1B1	2.71e-40
cg17206393	TRPC4AP	2.71e-40
cg00160262	OR6P1	2.71e-40
cg23834593	RP5-881L22.5;HNF4A	2.8e-40
cg04975143	ADAM6	2.84e-40
cg03909081	MIR30E	2.88e-40
cg02184008	ALX4	3.03e-40
cg00014900	ATP6V0B	3.07e-40
cg08526991	LINC01248;AC108025.2;SOX11	3.09e-40
cg12129480	OR10X1;OR10X1	3.11e-40
cg23780110	PTGES3P2	3.14e-40
cg05232914	OR5H6;OR5H6	3.14e-40
cg11436222	HIST1H3E	3.28e-40
cg10918927	HOXC4;RP11-834C11.14	3.32e-40
cg01072821	PRSS55	3.5e-40
cg10216848	RP11-394B2.3	3.51e-40
cg12196692	MROH2B	3.53e-40
cg17645823	TBX5;TBX5-AS1	3.6e-40
cg19544372	ZNF560;CTC-543D15.3	3.65e-40
cg03563308	GRP	3.76e-40
cg26489750	Metazoa_SRP	3.85e-40
cg10109421	RP11-297L17.3	3.92e-40
cg25648436	LETM1P2	3.92e-40
cg14582763	ZNF578	3.95e-40
cg13762704	AC245036.1	3.97e-40
cg02657401	ZNF729	4.34e-40
cg20970845	PCDHA14	4.39e-40
cg19486673	LILRA1	4.41e-40
cg24310126	DMBT1P1	4.43e-40
cg03940098	MIR663A	4.55e-40
cg06483559	OR6X1	4.61e-40
cg08097817	KRTAP11-1	4.67e-40
cg09523275	NKAPL	4.8e-40
cg18352935	OR51F2	5.03e-40
cg11754318	HOXD12	5.06e-40
cg01556075	MCEMP1;CTD-3214H19.16	5.19e-40
cg13617604	OR3A3	5.25e-40
cg18430128	ZNF135	5.25e-40
cg14340089	TG	5.37e-40
cg12063490	CTD-2192J16.22	5.42e-40
cg11924517	IL17A	5.51e-40
cg19039313	MCM6	5.62e-40
cg26261502	PAUPAR	5.64e-40
cg06544111	RP1-170O19.17;EVX1	5.71e-40
cg17993900	RP11-53M11.5	5.92e-40
cg12015737	HOXA5	5.98e-40
cg02596427	AC073283.7	6.17e-40
cg26194089	IQSEC3P1	6.25e-40
cg15949044	PCDHGC4	6.25e-40
cg06749213	OR4K5	6.29e-40
cg18202449	ELAVL4	6.34e-40
cg23797411	SORCS3	6.34e-40
cg22287731	TRIM51HP	6.47e-40
cg21922574	NETO1;RP11-676J15.1	6.6e-40
cg06496344	CTD-2291D10.3	6.6e-40
cg01054478	RP11-451H23.2	6.72e-40
cg22336004	PDE4B	6.77e-40
cg11429969	PCDHA3	6.78e-40
cg09938408	EHD4-AS1	6.91e-40
cg24960947	GAL3ST3;SF3B2	7.05e-40
cg23097499	MIR7846;TNFRSF1B	7.32e-40
cg26332191	LETM1P2	7.33e-40
cg04612444	RP11-17A4.2	7.42e-40
cg14308265	CENPVP3	7.57e-40
cg13327545	RP11-573G6.8	7.72e-40
cg18766475	CEP350	7.84e-40
cg02671880	LINC00391	8.03e-40
cg23244095	TMEM240	8.27e-40
cg14029856	OR5AR1;OR5AR1	8.35e-40
cg12751693	KLF17P1	8.57e-40
cg05416055	CYP11B1	8.92e-40
cg07866131	TYRO3	9.13e-40
cg07703790	DSG1	9.46e-40
cg13017239	KLF2P2	9.67e-40
cg01992935	KCNE5	9.73e-40
cg14058329	HOXA5	9.73e-40
cg23547143	ARSD-AS1	1.12e-39
cg19828416	OR4D1	1.12e-39
cg22154659	HOTAIRM1;HOTAIRM1_1	1.14e-39
cg01768686	SPNS3	1.14e-39
cg25991631	CTD-2281E23.1	1.14e-39
cg03229033	RNVU1-8	1.16e-39
cg14184077	GRXCR1	1.18e-39
cg21308365	CEP85L	1.23e-39
cg03425194	SNORD115-36;SNORD115-37	1.23e-39
cg06651311	NWD2	1.23e-39
cg04027961	AC021021.2	1.24e-39
cg05219493	RP11-348J12.2;CYP26C1	1.29e-39
cg23386659	PRTN3	1.32e-39
cg08265926	CENPN	1.33e-39
cg09571345	RP13-16H11.7	1.36e-39
cg00674365	ZNF471	1.38e-39
cg08200869	AC005618.9	1.4e-39
cg21416692	RN7SKP16	1.41e-39
cg21298978	CYP11B1	1.43e-39
cg05408203	RP11-616M22.3	1.47e-39
cg07395354	MEOX2;MEOX2-AS1	1.47e-39
cg26899012	CTC-493L21.1	1.5e-39
cg26233914	ITGAX	1.55e-39
cg24353740	RP11-501J20.3;KCNK18	1.56e-39
cg15852352	OR10T2	1.61e-39
cg16927040	SST	1.61e-39
cg03759824	SNTG1	1.61e-39
cg00625161	SNORD115-8;SNORD115-9	1.62e-39
cg27292079	CBFA2T3	1.73e-39
cg09577324	OR10A2	1.74e-39
cg26267272	TRIM43B	1.79e-39
cg26667091	SIPA1	1.81e-39
cg22253945	GPR45	1.83e-39
cg17650274	VSX1	1.84e-39
cg18866586	RP11-443C10.2	1.86e-39
cg05263479	AC004870.5	1.92e-39
cg10796749	RBP7	1.93e-39
cg27320005	SLC25A2	1.95e-39
cg16233450	OR2T34	1.96e-39
cg25147941	CTD-2313P7.1	2.03e-39
cg13316404	RN7SKP78	2.16e-39
cg13585149	KCNRG	2.21e-39
cg20965743	ASPG	2.29e-39
cg02264079	RP11-196G11.2	2.29e-39
cg02005771	REG3A	2.31e-39
cg09550024	CYP2C9	2.4e-39
cg06534464	RP11-386M24.3	2.41e-39
cg00136477	C1QC	2.42e-39
cg01679262	IPO5	2.46e-39
cg24680320	HKR1	2.46e-39
cg24476497	SORCS3-AS1	2.47e-39
cg07598952	NMBR;RP11-137J7.2	2.58e-39
cg00040312	HOXC5	2.58e-39
cg27160395	MIR10B;AC009336.19;HOXD4	2.59e-39
cg23181133	CEACAM3	2.71e-39
cg03811891	CACYBPP3	2.78e-39
cg10501976	GCM2	2.8e-39
cg24403845	SORCS1	2.83e-39
cg02935097	BRDT	2.84e-39
cg03909500	RXFP3	2.86e-39
cg05016408	ZNF300P1	2.92e-39
cg23980760	ACCSL	3.02e-39
cg12475994	FAM153A	3.04e-39
cg12431879	TPTEP1	3.09e-39
cg16167166	OR5AN1	3.21e-39
cg12103152	HTR1B	3.26e-39
cg21610164	HIST1H3G;HIST1H2APS4;HIST1H2BI	3.34e-39
cg22881914	NID2	3.41e-39
cg05477514	NKX2-6;RP11-175E9.1	3.49e-39
cg16686900	DRICH1	3.64e-39
cg15588215	EOMES	3.7e-39
cg22466653	OR4D1	3.71e-39
cg13103143	RP11-547D24.1	3.71e-39
cg18849102	MSX1	3.75e-39
cg27226238	REG1P	3.84e-39
cg06534376	XXbac-BPG252P9.10	3.89e-39
cg05413258	RBM44	4.21e-39
cg12820134	RP11-669N7.2	4.31e-39
cg13983776	TPM3P9;ZNF761	4.4e-39
cg22131234	VSTM2A	4.41e-39
cg04413320	RP11-95F22.1	4.78e-39
cg09905605	RP11-196G11.2	4.8e-39
cg12553321	PGK2	4.81e-39
cg21870760	MIR2114	4.89e-39
cg27324426	ZNF154	4.97e-39
cg00334691	SNORD115-29	4.99e-39
cg05081953	ERMN	4.99e-39
cg05946604	OR1A1	5e-39
cg24385652	FAM170B-AS1	5.01e-39
cg23254031	MDGA2	5.26e-39
cg11435466	CD6	5.28e-39
cg21093192	CACNG7	5.54e-39
cg02912371	SLC26A9	5.57e-39
cg06672120	IRF8	5.7e-39
cg14269191	OR51B2;OR51B2	5.95e-39
cg15551105	RP11-254F7.4	6.32e-39
cg02327719	RP1-125I3.2	6.41e-39
cg01363714	LINC00605	6.51e-39
cg07850418	ZIC1	6.61e-39
cg11225751	PRAME;LL22NC03-63E9.3	6.65e-39
cg01913196	DCAF12L1	6.67e-39
cg21791662	RP11-297J22.1	6.71e-39
cg05474726	MIR124-2	6.78e-39
cg11592852	GPR142	6.87e-39
cg18721420	CCDC105	6.87e-39
cg18384712	RP11-172C16.4	7.18e-39
cg10384245	RP11-672L10.3	7.34e-39
cg19291355	AARS2	7.83e-39
cg00148114	RP11-1275H24.1;RP11-1275H24.3	7.98e-39
cg12486762	RP11-405A12.1	8.06e-39
cg00988056	IGHD2-8	8.24e-39
cg06846214	OR2T6	8.3e-39
cg13882284	MSX1	8.57e-39
cg11398299	GLRXP3	8.58e-39
cg12130607	IQSEC3P1	8.77e-39
cg05724097	ACAP3	9.03e-39
cg03469054	TMEM132D	9.07e-39
cg01010923	SNORD115-39	9.08e-39
cg17661462	MCEMP1;CTD-3214H19.16	9.17e-39
cg08200621	OR4D2	9.2e-39
cg06277657	DGKI	9.22e-39
cg13048008	RP11-849H4.4	9.42e-39
cg05788138	OR5L1;OR5L1	9.56e-39
cg03951603	LINC00925	9.67e-39
cg15058464	LINC00261	9.85e-39
cg09682848	RP13-895J2.9	1.04e-38
cg04970570	CTC-467M3.3	1.05e-38
cg22457503	RNU6-803P;MIR520D;MIR517B	1.07e-38
cg12950441	HTR2C	1.08e-38
cg05292478	SMURF1	1.08e-38
cg00937286	RP11-452N4.1	1.08e-38
cg21071075	FAM8A2P	1.08e-38
cg02473594	DPP6	1.1e-38
cg07837260	SLC24A2	1.11e-38
cg18757468	SIPA1	1.12e-38
cg18044383	CDH20	1.13e-38
cg25377206	TBX20	1.14e-38
cg04747619	DEFA5	1.15e-38
cg23257859	MIR550A2	1.17e-38
cg17305181	CRH	1.19e-38
cg17060964	OR5AS1	1.2e-38
cg14013695	HOXA5	1.21e-38
cg16914123	DPY19L2P1	1.22e-38
cg21784383	ESRRG	1.22e-38
cg03991721	AGGF1P3	1.25e-38
cg05201970	HCN1	1.26e-38
cg16742703	KLK3	1.29e-38
cg11284973	RNY4P10	1.32e-38
cg02966053	SNORD115-8;SNORD115-9	1.35e-38
cg23689219	OR10J1	1.36e-38
cg19244928	RNU6-1041P;MIR516A2;CTC-339O9.1;AC011453.2	1.44e-38
cg05589845	RP1-170O19.17;EVX1	1.48e-38
cg11324259	CYP11B2	1.5e-38
cg04704531	HOXC4;RP11-834C11.14	1.55e-38
cg03283464	SNORD115-43	1.58e-38
cg04894619	PEX5L	1.66e-38
cg03857640	RP11-46D6.4	1.69e-38
cg02249074	ZNF782	1.75e-38
cg20719439	FHL5	1.75e-38
cg11382945	CRNKL1	1.76e-38
cg10848367	SCGB1D2	1.77e-38
cg08670465	LCP2	1.79e-38
cg26353903	DCANP1;CTB-138E5.1	1.8e-38
cg11751806	ADAMTS20	1.8e-38
cg11111740	ZBED9	1.89e-38
cg03129645	MOXD2P	1.92e-38
cg25840354	TLR10	1.92e-38
cg17612147	SPPL2C	1.93e-38
cg10126205	TWIST1;AC003986.7	1.95e-38
cg06720669	KCNE5	1.96e-38
cg10300864	MIR495	1.98e-38
cg26079753	HOTAIR_2	1.98e-38
cg05667379	DPP10-AS1	1.98e-38
cg02131862	KRTAP24-1	2.06e-38
cg26727693	RP11-715H19.2	2.09e-38
cg21748751	PPARD	2.09e-38
cg19991916	PIGB	2.09e-38
cg10915263	RP11-157G21.2	2.11e-38
cg00268840	ALX4	2.11e-38
cg18239753	KHDRBS2	2.13e-38
cg15602074	HTR1B	2.16e-38
cg15731655	HOTAIR_2	2.21e-38
cg26683398	LTC4S	2.24e-38
cg17670263	MIR520C;MIR518C	2.27e-38
cg24701725	IGHA2	2.36e-38
cg04730882	HOXD9	2.37e-38
cg24928391	SOX17	2.43e-38
cg00014998	MIR10B;AC009336.19;HOXD4	2.47e-38
cg16158220	AC011754.1	2.56e-38
cg17642941	HOXA7;RP1-170O19.24	2.7e-38
cg17888086	MIR6732	2.7e-38
cg00608151	PABPC5-AS1;PABPC5	2.73e-38
cg24005701	TRIM64B	2.74e-38
cg03992651	MTND1P15;RP11-846F4.5	2.74e-38
cg09041678	PAX6	2.74e-38
cg22869726	OLIG2	2.76e-38
cg16996281	MFRP;MFRP	2.83e-38
cg08361126	ITGA8	2.86e-38
cg06287707	CPXCR1	2.88e-38
cg11286405	SNORD115-20;SNORD115-21	2.98e-38
cg11164441	RP11-1191J2.5	3e-38
cg14882265	HOXA5	3e-38
cg13473356	PEX5L	3.08e-38
cg04730443	MAGEB6	3.23e-38
cg24109894	PSMB2	3.36e-38
cg14794043	ZNF208	3.38e-38
cg19735804	TRBV27	3.44e-38
cg18375860	RYR2	3.46e-38
cg27036111	SLC6A5	3.46e-38
cg00356694	SPNS3	3.47e-38
cg09890332	RP11-64J4.7;OR3A4P;OR3A5P	3.52e-38
cg14202757	RBP7	3.62e-38
cg03465179	IGHA2	3.63e-38
cg05009934	CLVS2	3.66e-38
[truncated: 83,608 more rows]

## Sheet: KIRC
probe	gene	adj.P.Val
cg26063719	VIM-AS1	1.34e-234
cg16468729	CXCL8	6.48e-225
cg11201447	MIR1204	2.51e-217
cg18973101	TMEM79	6.05e-202
cg25247520	MIR1204	2.63e-200
cg00093087	AQP2	1.21e-199
cg08141142	RP11-521B24.5	1.31e-197
cg06913958	BCL10	2.61e-190
cg15034300	TRABD2A	2.43e-189
cg14153654	RP5-892F13.2	4e-188
cg14601621	MIR3074	2.41e-183
cg13309012	MIR155	4.06e-179
cg11588197	MIR6090	8.26e-178
cg08995609	RIN1	1.42e-177
cg14189782	EHBP1L1	3.41e-176
cg01492656	N4BP2	3.66e-172
cg04474049	CAV1	7.66e-169
cg10880902	RP11-63G10.3	1.2e-166
cg14665413	TLR1;TLR6;AC108044.1	3.32e-163
cg25743481	KIAA1143;KIF15	2.43e-162
cg12315892	RP11-173M1.5	2.28e-161
cg20549620	AC114765.1	5.29e-161
cg06349174	AC090587.5;MIR4687	5.34e-160
cg10460946	RP11-219G17.8	7.94e-159
cg12403889	MAD2L2	1.55e-157
cg07126235	RP3-330M21.5	2.46e-157
cg11405655	RP11-54O7.18	3.8e-157
cg02515217	MIR21	1.78e-155
cg04999352	RARRES3	5.07e-154
cg27107970	C17orf70	6.58e-154
cg04981492	SYDE1	9.64e-154
cg21469505	LIPG	1.52e-153
cg16411857	NLRC5	1.68e-153
cg03890877	RP5-1157M23.2	2.96e-153
cg21275690	THOC6	3.13e-153
cg23261919	RP13-49I15.6	2.3e-152
cg19789466	OAS1	2.69e-152
cg26853536	MIR5188	1.21e-151
cg04276626	MIR21	2.09e-151
cg13784855	PVT1;PVT1_1;MIR1204	2.61e-151
cg09182678	CITF22-49E9.3	1.44e-150
cg02587624	HOXA13;HOTTIP_1;HOTTIP_2;HOTTIP_3	6.26e-150
cg02481642	WISP2	2.29e-149
cg17888086	MIR6732	2.61e-149
cg21737444	LGALS1	9.8e-149
cg01254505	BST2;CTD-2521M24.9;MVB12A	2.16e-148
cg13568258	EMP3	2.51e-148
cg17469978	CAV1	4.16e-148
cg19643053	HOXA5	1.48e-147
cg26559804	MIR6090	4.34e-147
cg07167594	AC000095.11	6.43e-147
cg27080119	RP11-679C8.2	4.13e-146
cg07729527	RP11-394I13.1	1.28e-145
cg15759721	MIR21	4.65e-145
cg19303682	EBI3	4.48e-144
cg04815707	WI2-87327B8.2	5.84e-144
cg03033176	EHBP1L1	5.99e-143
cg05346832	CDKN2D	1.81e-142
cg08427717	ICAM1	2.18e-142
cg24876187	CCHCR1	2.47e-142
cg14042308	RIN1	3.85e-141
cg14391855	RIN1	8.58e-141
cg18514820	VIM-AS1	5.55e-140
cg19008097	CD14	6.83e-140
cg00702638	KIAA1143;KIF15	4.49e-139
cg01287592	RP11-809O17.1	5.07e-139
cg07826859	MYO1G	6.54e-139
cg07830160	RP11-190A12.9	9.64e-139
cg19196335	HOXA5	3.81e-138
cg11183156	LGALS12	5.77e-138
cg13052638	RP11-534L20.5	6.88e-138
cg02782634	MIR21	6.97e-138
cg16108230	VGLL2	1.49e-137
cg05178291	SAA1;RNA5SP334	1.69e-137
cg05106269	ICAM1	1.76e-137
cg14075731	CD300LB	5.07e-137
cg19853703	APOL6	7.07e-137
cg24389585	HOXA5	8.55e-137
cg24680248	ANGPTL4	6.65e-135
cg16592658	EBI3	1.17e-134
cg26369418	CSF2	1.21e-134
cg13092901	SCO2	3.92e-134
cg02331902	LUCAT1;RP11-213H15.4	5.02e-134
cg17508591	PCDHA7	5.44e-134
cg04988978	MPO	5.92e-134
cg13609040	B4GALT4	1.37e-133
cg13439241	LGALS12	2.63e-133
cg16033151	RP11-68I3.5	9.69e-133
cg03207666	HOXA5	4.99e-132
cg24185397	RP11-173M1.4	5.65e-132
cg14882265	HOXA5	5.78e-132
cg05417332	TBX6	1.13e-131
cg05125838	UCN2	1.33e-131
cg25731261	BBC3	1.46e-131
cg07550267	RP11-269F19.2;SNORD55;SNORD46;SNORD38A	2.19e-131
cg25479708	RP11-599B13.6;VAMP2	3.3e-131
cg18677603	LINC00887	4.26e-131
cg07181702	MIR21	4.97e-131
cg08203284	HOXA4	2.12e-130
cg19136632	ARL6IP5	2.26e-130
cg17755386	RP11-269F19.2;SNORD46;SNORD38A;SNORD38B;SNORD38B	7.08e-130
cg21091985	MSH5;MSH5-SAPCD1	1.26e-129
cg27658254	RP11-809O17.1	2.1e-129
cg01214061	SAP30	4.62e-129
cg07156484	RP4-747G18.5	5.91e-129
cg09462575	PI3	9.2e-129
cg09343092	HOXA5	9.29e-129
cg14058329	HOXA5	1.21e-128
cg15888097	HTR1E	1.37e-128
cg25951430	RP11-872D17.8	2.76e-128
cg06520521	AHNAK	3.09e-128
cg06162324	FXYD4	5.11e-128
cg08288811	PCDHA3	8.34e-128
cg26256521	RP11-982M15.6	8.91e-128
cg26351966	RP11-34D15.2;SCD	1.56e-127
cg08016257	TMEM140	1.94e-127
cg17272620	CTB-50L17.14;LRG1	3.91e-127
cg25343618	RP11-284F21.7	5.74e-127
cg12394201	ALKBH3-AS1;RP11-613D13.4	1.24e-126
cg27376024	LGALS12	1.38e-126
cg07176692	SLC16A1	2.99e-126
cg16015593	LINC00519	4.12e-126
cg00974935	AIM1	5.81e-126
cg00502926	RNASE7	2.01e-125
cg00363813	IFFO1	2.29e-125
cg19131731	LIF	2.29e-125
cg17557540	XXbac-BPG299F13.17	2.67e-125
cg15103195	AP1S1	3.25e-125
cg07049592	HOXA5	3.38e-125
cg12393668	CCDC43	4.68e-125
cg22341848	TCEB3-AS1	5.03e-125
cg00962254	WFIKKN1	6.63e-125
cg08918274	VIM	7.3e-125
cg07172334	KRTAP24-1	1.3e-124
cg24124145	CCRN4L	1.61e-124
cg17501395	ZC3H12D	1.75e-124
cg01323381	HOXA5	1.76e-124
cg23877608	EMP3	2.26e-124
cg00458681	AC000095.11	2.33e-124
cg11946459	HCG4P5	6.25e-124
cg25773386	RP11-155D18.13;GPR62	7.56e-124
cg23821329	VIM	9.64e-124
cg19687152	RNU6-244P	1.08e-123
cg00587922	AL662797.1	2.59e-123
cg09880291	HOXA5	7.02e-123
cg13036352	AL662797.1	7.92e-123
cg26758857	APOL1	1.53e-122
cg09948419	MYO1G	1.56e-122
cg02225720	CTD-3195I5.3	2.54e-122
cg20610181	CA9	2.83e-122
cg18082788	ZC3H12D	1.54e-121
cg03818307	ECM1	1.55e-121
cg13442606	RNU1-91P	2.55e-121
cg00969405	HOXA5	5.57e-121
cg02746869	VIM-AS1	6.48e-121
cg10583119	RNU6-980P;AC011453.3	6.81e-121
cg17508941	AC003986.5	1.35e-120
cg00780520	MIR1204	1.89e-120
cg24641737	CHI3L2	2.16e-120
cg18405900	AIM1	2.47e-120
cg24888989	KIAA1143;KIF15	2.64e-120
cg08692006	TNFAIP8L1	6.17e-120
cg19748485	PCDHGA5	6.18e-120
cg06189038	GAL3ST4	1e-119
cg22579950	DLEU2_6;DLEU1;DLEU1_1	1.15e-119
cg24935121	ADAM15	1.18e-119
cg25840608	KRT8P9	1.34e-119
cg11736020	AL662797.1	1.67e-119
cg05247640	RP11-599B13.6;VAMP2	1.97e-119
cg25986727	RP11-849H4.4	2.89e-119
cg03345805	INPP1	5.7e-119
cg07018107	MIR1208	1.2e-118
cg14292522	RP11-175P13.2	1.51e-118
cg09676013	HLA-DPB2	1.91e-118
cg00448761	CTC-232P5.3	5.2e-118
cg15013617	TMEM239;C20orf141;TMEM239	1.13e-117
cg21641458	HOXA5	1.44e-117
cg14053030	SIGLEC15	1.71e-117
cg13432294	ENO1-IT1;ENO1-AS1	2.17e-117
cg19937878	RP1-257A7.4	3.27e-117
cg04275695	ZC3H12D	5.1e-117
cg24884084	SPRR1B	5.26e-117
cg20749059	SPATA12	5.62e-117
cg19853760	LGALS1	7.33e-117
cg14037250	RP11-374P20.4	1.33e-116
cg09727050	TNFAIP6	1.74e-116
cg24194539	AIM1	1.84e-116
cg16541026	RP13-131K19.2;P4HTM	1.91e-116
cg18687085	RP11-845C23.3	2.91e-116
cg27082076	RP11-521B24.5;CRIP2	3.63e-116
cg00876266	AC104532.4	3.71e-116
cg02880444	RP1-41C23.2;MIR4724	7.05e-116
cg19131313	CLN8	8.94e-116
cg05209483	CD68	8.95e-116
cg24922090	PCDHGA6	1.01e-115
cg26157385	TRIM58	1.05e-115
cg02779592	SRPX2	1.13e-115
cg08664849	RP11-20I23.1	1.17e-115
cg17432857	HOXA5	1.55e-115
cg00175901	OAS2	1.97e-115
cg06755297	AURKAPS1	2.78e-115
cg14562054	RIN1	4.97e-115
cg24310959	SNORA71B;SNORA71	5.57e-115
cg11496630	HTATSF1P2	1.15e-114
cg15095917	CD68	1.9e-114
cg11318133	OAS2	4.99e-114
cg02578944	NKAPL	8.9e-114
cg15101245	RP11-284F21.7	9.14e-114
cg19256731	RP5-858L17.1;SIRPA	1.15e-113
cg13223682	RP11-394I13.1	1.36e-113
cg00004996	MTMR7	2.75e-113
cg05774699	HOXA5	2.85e-113
cg23031196	SLC38A1	3.18e-113
cg03317642	RP11-60A8.1	3.23e-113
cg13244293	NGLY1	3.71e-113
cg01942558	TNFAIP6	4.83e-113
cg07156249	TAP1	5.96e-113
cg26514492	GPR132	6.03e-113
cg20312390	RP11-90O23.1	8.21e-113
cg10061342	RP11-382D12.2	1.12e-112
cg00982984	SHF;CTD-2651B20.6	1.23e-112
cg21114334	IFITM4P;XXbac-BPG170G13.32	1.46e-112
cg02106682	HOXA5	1.9e-112
cg24843609	BGLAP	2.27e-112
cg09535960	RP11-177H13.2	2.65e-112
cg01651570	Y_RNA	3.91e-112
cg11098259	AQP9	5.36e-112
cg18394118	DRAM1	6.29e-112
cg14370448	TBX6	1.02e-111
cg21064451	LGALS1	1.32e-111
cg10268345	MIR1225;RP11-304L19.1	5.45e-111
cg20971488	DUSP5P1;SNORA51	8.54e-111
cg22631818	RASA3-IT1	1.17e-110
cg16435923	PCDHGA5	2.4e-110
cg25539074	MORF4L2P1	2.52e-110
cg06764092	SLAMF8	3.73e-110
cg13985198	RP11-269F19.2;SNORD46;SNORD38A;SNORD38B;SNORD38B	4.27e-110
cg19475067	HMGA1P3	4.77e-110
cg19050940	LMO7DN	4.94e-110
cg11426157	SYNPO	6.01e-110
cg22226527	EMP3	6.25e-110
cg19008088	TLX1	9.4e-110
cg17128799	PANK4	1.34e-109
cg25629905	SSPN	1.88e-109
cg24394172	GABRB1	1.92e-109
cg00965643	DCDC2B	3e-109
cg06698332	S100A10;AL591893.1	3.16e-109
cg25742326	PLEKHN1	3.19e-109
cg26023912	HOXA5	3.42e-109
cg13524919	OLIG2	4.71e-109
cg24702147	U47924.27;MIR200C;MIR141	5.37e-109
cg21301148	MYH6	7.27e-109
cg22041640	PCDHGB4	1.22e-108
cg00868875	RP11-9E17.1	1.31e-108
cg04761746	SCOC	1.57e-108
cg18458509	SLC22A18	1.68e-108
cg13767779	RP11-159D12.11	2.04e-108
cg26503877	MIR6090	2.1e-108
cg08409642	MT2A	2.75e-108
cg03624316	C12orf10	2.83e-108
cg03677952	MLC1	3.62e-108
cg12663811	PLEKHN1	3.77e-108
cg17849530	FAM107B	4.37e-108
cg13027458	APOOP5	5.08e-108
cg13597544	RP11-1055B8.4	5.98e-108
cg24471254	ACTL6B	8.39e-108
cg25954539	MIR6891;XXbac-BPG248L24.12	8.55e-108
cg12858593	PIWIL2	8.79e-108
cg03354554	RP11-540A21.2	1.02e-107
cg16810293	TM4SF1;TM4SF1-AS1	1.37e-107
cg26781303	RP11-95P2.3	2.19e-107
cg14013695	HOXA5	2.85e-107
cg24203709	SPTBN5	2.86e-107
cg00808170	AC005618.9	4.11e-107
cg03856178	ARID5A	4.81e-107
cg09491897	CTD-2561B21.3	5.14e-107
cg25960769	TREML2	6.42e-107
cg15364131	C22orf24	7.22e-107
cg08248751	RP5-1120P11.1	7.42e-107
cg16489193	VPS52;RPS18	9.12e-107
cg17476701	AL662797.1	9.17e-107
cg07141504	LINC00887	1.06e-106
cg06211255	FRMD8	1.14e-106
cg26549174	ICAM1	1.38e-106
cg26627956	IMPDH1P10;RNU7-45P	1.4e-106
cg12141030	KIAA1143;KIF15	1.55e-106
cg16959758	TGM2	1.77e-106
cg15132169	ZC3H12D	2.59e-106
cg22087053	PCDHGA6	3.13e-106
cg13616930	ZNF750	3.25e-106
cg26390400	RP11-54F2.8	3.73e-106
cg26305174	TRIP6	4.95e-106
cg21190595	RNU1-91P	6.71e-106
cg19279257	TRIP6	1.03e-105
cg14186336	RP11-477J21.6	1.17e-105
cg11429969	PCDHA3	1.32e-105
cg03368099	HOXA5	1.46e-105
cg10852165	P2RX7	1.48e-105
cg10970251	PANO1	1.56e-105
cg09177080	UNC13D	1.8e-105
cg19539004	LIF	2.62e-105
cg13136655	ZC3H12D	3.47e-105
cg18939260	MTSS1	3.82e-105
cg10470208	NPW	5.32e-105
cg00870242	C8orf74	7.63e-105
cg09320690	EHD2	8.47e-105
cg17198308	IFFO1	1.12e-104
cg04598121	RP11-17A4.2	1.41e-104
cg07886914	RP11-380I10.4	1.75e-104
cg14766231	TTC32	2.15e-104
cg23678594	NADK	2.16e-104
cg25258233	HLA-DRA	2.44e-104
cg26846864	MEFV	2.98e-104
cg03290522	LINC00927	3.31e-104
cg25657261	PCDHGA3	3.35e-104
cg07463541	PCDHA3	3.83e-104
cg17466696	LINC00272	4.87e-104
cg15177359	UNC13D	6.45e-104
cg26875384	FAM107B	1.32e-103
cg11577097	AQP9	1.53e-103
cg25506432	HOXA5	1.7e-103
cg19735804	TRBV27	1.9e-103
cg01298514	VEGFA	1.91e-103
cg04374393	SOX14	2.2e-103
cg22720029	PISD	2.36e-103
cg10064871	PRKCDBP	4.99e-103
cg15026767	S100A3	6.82e-103
cg11009596	AURKB	6.97e-103
cg26612727	ZPBP2	1.06e-102
cg09577651	RP4-576H24.4;SIRPB1	1.07e-102
cg06586763	SNX29P2	1.82e-102
cg00913954	STK40	1.84e-102
cg21341586	AC019131.1	1.92e-102
cg18025409	RP5-892F13.2	2.26e-102
cg23586138	FNDC4;GCKR	2.27e-102
cg19583076	CD79A	2.32e-102
cg05402891	TCL1B	3.54e-102
cg17522445	LIG1;ZNF114	3.82e-102
cg18951352	ZC3H12D	4.31e-102
cg27151303	HOXA5	5.14e-102
cg06800962	TM4SF1;TM4SF1-AS1	5.67e-102
cg13515269	SSPN	6.51e-102
cg21580456	RP11-158I23.1	9.12e-102
cg18125510	WDR25	9.81e-102
cg06413398	DDO	9.81e-102
cg00370106	SYTL3	1.28e-101
cg26429629	LINC01366	1.28e-101
cg20556951	SP6	1.32e-101
cg25937598	CALHM3	1.43e-101
cg02872426	DDO	1.57e-101
cg16544169	NKX2-6;RP11-175E9.1	1.6e-101
cg25630380	NTRK1	1.77e-101
cg00911351	PCDHGB4	2.55e-101
cg03212183	MIR7854	3.39e-101
cg14599440	MPPE1	7.89e-101
cg14450238	CTDSP1	8.53e-101
cg10477621	FERD3L	9.33e-101
cg04204669	TH;MIR4686	9.64e-101
cg20161965	HOXA4	9.81e-101
cg13591848	SFXN3	1.08e-100
cg14263139	RIN1	1.23e-100
cg16997642	HOXA5	1.26e-100
cg16048383	LTBR	1.48e-100
cg07164639	DDO	1.48e-100
cg26904260	MIR7154	2.09e-100
cg20408505	HCG4P5	4.59e-100
cg10904867	MFRP;MFRP	5.27e-100
cg09678939	ZC3H12D	6.19e-100
cg22731981	ELF5	6.54e-100
cg23574281	FAM110C	7.25e-100
cg21929784	RP11-495P10.9	9.34e-100
cg03460527	F3	9.48e-100
cg02130107	CTD-2574D22.6	1e-99
cg23220439	RIN1	1.27e-99
cg25856811	SPRR3	1.41e-99
cg13249591	S100A10;AL591893.1	2.8e-99
cg16669650	C6orf132	3.15e-99
cg23882019	TNFRSF10A	3.92e-99
cg04314261	CLEC12B	3.92e-99
cg09176539	RP11-707M1.1	5.45e-99
cg05379350	ANKRD13B	6.84e-99
cg17419597	BGLAP	6.95e-99
cg08061755	RP11-540A21.2	8.18e-99
cg02596427	AC073283.7	8.55e-99
cg24476153	RP11-809O17.1	9.45e-99
cg00514486	CDHR4	1.07e-98
cg22074858	GBP3	1.21e-98
cg05349039	COL18A1-AS1	1.24e-98
cg05383490	FAM155A	1.52e-98
cg10841756	PVRL4	2.44e-98
cg00539360	VEGFA	2.51e-98
cg09338148	RP11-178L8.8	2.55e-98
cg07153966	HOXA-AS2	2.62e-98
cg19794481	MIR200C;MIR141;U47924.29	2.67e-98
cg25212131	SLC25A2	2.68e-98
cg15084543	ELTD1	2.94e-98
cg01373189	N4BP2L1	3.75e-98
cg19170009	RP11-124N14.3	5.14e-98
cg13168012	RP11-881M11.4	6.16e-98
cg01525538	DUSP5P1	7.34e-98
cg03076130	AC005329.7	7.53e-98
cg17608381	HCG4P5	8.87e-98
cg02537838	RBBP8NL;RP5-908M14.5	1.02e-97
cg05363955	MIR4439	1.2e-97
cg09143801	RP11-68I18.10	1.21e-97
cg07409680	RP11-843B15.2;RP11-843B15.4	1.24e-97
cg26312888	LINC00524	1.73e-97
cg20155035	RP11-443B7.2	1.82e-97
cg08978665	IL32	1.98e-97
cg06499030	HLA-DQB2	2.03e-97
cg15211996	ACTRT2	2.29e-97
cg13933080	SPAG6	2.42e-97
cg10469791	GRXCR1	3.68e-97
cg00184953	PSORS1C3	4.16e-97
cg04553690	PCDHGB5	5.37e-97
cg14658493	HOXA5	5.59e-97
cg01883427	Y_RNA	6.17e-97
cg09555736	LA16c-359F1.1;RAB11FIP3	7.39e-97
cg18568589	ZNF560;CTC-543D15.3	8.35e-97
cg15745401	P2RY6	8.46e-97
cg15484375	SAA1;RNA5SP334	1.05e-96
cg13502540	XXbac-BPG299F13.17	1.59e-96
cg04396850	LINC00944	1.92e-96
cg23228178	PADI4	2.14e-96
cg22137471	RHOQ	2.16e-96
cg00619207	CHI3L2	2.95e-96
cg25095814	CASP8	3.28e-96
cg05817709	RARRES3	5.63e-96
cg19811994	RASSF1-AS1	5.8e-96
cg18738906	LTBR	6.25e-96
cg00246451	RP11-336K24.12	6.57e-96
cg10316474	APOBEC3C;APOBEC3D	6.62e-96
cg01979888	IFFO1	6.64e-96
cg05845376	SLC25A2	6.8e-96
cg23801544	SGSM1	8.95e-96
cg16857801	RP11-707M1.1	8.98e-96
cg07352859	CTD-2555A7.1	8.98e-96
cg13800769	KCNA6	9.55e-96
cg07668993	SLPI	1.71e-95
cg00682096	HOXB5	2.03e-95
cg09951047	MIR3074	2.21e-95
cg01957582	C22orf24	2.24e-95
cg07690326	MIR661	2.81e-95
cg19414741	RP11-17A4.2	3.3e-95
cg01517384	MIR6891;XXbac-BPG248L24.12	3.3e-95
cg03128029	SNORD70	3.45e-95
cg00450651	PURA	3.77e-95
cg09072216	SPG20-AS1	4.46e-95
cg06663644	SPTBN4	5.79e-95
cg12907644	SAA2-SAA4;SAA2;RNA5SP333	7.24e-95
cg13718870	RP11-374P20.4	7.51e-95
cg03206537	NEURL2;RP3-337O18.9	7.85e-95
cg07151443	XXbac-BPG181M17.5	8.07e-95
cg06875754	AMPD3	9.13e-95
cg00282706	ANO2	9.38e-95
cg25016420	SPTLC3	9.9e-95
cg18750756	SPNS3	1.19e-94
cg16865965	VAMP5	1.2e-94
cg16291917	SNORA38	1.38e-94
cg19643921	NUMBL	1.44e-94
cg22843797	TNFRSF10A	1.48e-94
cg00606739	RP11-707M1.1	1.54e-94
cg07641807	MIR17;AL162375.1;MIR19A;MIR20A;MIR19B1;MIR92A1	1.75e-94
cg26775866	SLU7;PTTG1	2.9e-94
cg13610455	SNORA71B;SNORA71	3.09e-94
cg14550985	RIN1	3.53e-94
cg11558551	BST2;CTD-2521M24.9;MVB12A	3.59e-94
cg09340639	FCRL1	4.34e-94
cg26365847	RP11-1078H9.1;LINC00642	4.34e-94
cg02901136	S100A12	4.35e-94
cg24580782	NR0B2	5.33e-94
cg23234674	SNORA74B	6.98e-94
cg16431978	KRTAP13-2;KRTAP13-3	7.04e-94
cg03110993	RHBDF1;MPG	7.07e-94
cg23101680	LINC01055	7.31e-94
cg08264885	MIR320A	7.64e-94
cg22517388	CARTPT	1.13e-93
cg20830848	RP11-134L10.1	1.19e-93
cg03852144	GLRX	1.41e-93
cg09758894	MMP27	1.54e-93
cg10817441	TAP1	1.78e-93
cg05280131	MIR4784;AC093838.4	1.87e-93
cg19821297	Metazoa_SRP	2.26e-93
cg06013113	WFIKKN1	2.71e-93
cg19580810	RAB25	2.94e-93
cg27112809	KRT16P2	3.8e-93
cg03744763	HOXA5	4.4e-93
cg01155325	RNU6-188P	5.56e-93
cg23698269	SBF2	7.16e-93
cg05177629	SEMG1	8.35e-93
cg03875678	GZMB	8.75e-93
cg27147785	OAS2	1.03e-92
cg05801374	PNRC2	1.18e-92
cg11746996	LINC00550	1.31e-92
cg24315815	PLSCR4	1.34e-92
cg05127924	FBXW10	2.17e-92
cg23189410	ZIC4	2.3e-92
cg14085262	CHI3L1	2.89e-92
cg08616061	PCDHGA6	3.52e-92
cg01306985	IFITM4P;XXbac-BPG170G13.32	3.81e-92
cg12877723	RP11-17A4.2	4.09e-92
cg03317463	FBXL8	4.09e-92
cg11956819	MIR661	4.28e-92
cg13538006	NINJ1	4.51e-92
cg18441959	VPREB1	5.01e-92
cg13485320	SLC22A18	5.54e-92
cg09645138	LINC01338	5.64e-92
cg06720467	SFN	6.09e-92
cg12307200	TPRG1	6.84e-92
cg27125504	ITIH4	7.17e-92
cg05643592	TOMM40L;MIR5187	7.97e-92
cg25647415	SEMA3B	8.3e-92
cg21694941	RP11-17A4.2	8.44e-92
cg06051311	TRIM15	9.61e-92
cg07529658	COL18A1-AS1	1.11e-91
cg08491188	PCDHGB5	1.21e-91
cg03758467	PCDHA6	1.28e-91
cg25241038	PROM2	2.2e-91
cg11414821	AL662797.1	2.27e-91
cg00181439	HTR1B	2.39e-91
cg21830368	RP11-936I5.1	2.91e-91
cg00080081	SLFN11	3.15e-91
cg07907517	PSORS1C3	3.3e-91
cg18188010	SPTBN5	3.91e-91
cg01467789	RP11-863K10.7	6.03e-91
cg13972491	MIR3074	7.04e-91
cg22298860	HLA-F	7.19e-91
cg15360181	SLC9A9	7.95e-91
cg05923226	CCDC105	1.06e-90
cg09174555	S100A8	1.17e-90
cg08070327	HOXA5	1.65e-90
cg04898939	SMG1P5;RP11-347C12.12	1.66e-90
cg17765384	HCG25	2.08e-90
cg02311725	HCK	2.11e-90
cg03732263	HMGN2	2.22e-90
cg08267888	RP11-19N8.2	2.23e-90
cg25850808	CD109	2.29e-90
cg01155497	AC005609.16	2.31e-90
cg10825315	CEP128	2.59e-90
cg18029321	AC005609.19	2.87e-90
cg13440894	BLK	3.8e-90
cg13251666	TRGV7	4.07e-90
cg01907761	SPINK13	4.39e-90
cg17009836	CGB;NTF6A	4.78e-90
cg05184372	RP11-539I5.1	8.16e-90
cg25330366	VPREB1	9.51e-90
cg00400733	LINC01574	9.79e-90
cg11052535	OR9G1	1.17e-89
cg18972123	MBL2	1.37e-89
cg01748892	HOXA5	1.42e-89
cg06757585	PCDHGA6	1.7e-89
cg07303143	KIAA1143;KIF15	1.76e-89
cg01320573	CUTA;SYNGAP1	1.79e-89
cg13473894	RP11-353M9.1	1.85e-89
cg21693907	ATP2B4	2.06e-89
cg01200021	AL591063.1	2.56e-89
cg24635860	ZC3H12A	2.71e-89
cg04212239	IFT80	3.13e-89
cg07240873	PCDHA10	3.38e-89
cg03363565	LA16c-359F1.1;RAB11FIP3	3.71e-89
cg17799287	MIR17;AL162375.1;MIR19A;MIR20A;MIR19B1;MIR92A1	3.89e-89
cg03433699	ALOX12-AS1;C17orf49	4.05e-89
cg11393995	SERPINB1	4.94e-89
cg13586051	DNASE1L3	5.07e-89
cg02247178	TEX26	5.18e-89
cg21308365	CEP85L	5.31e-89
cg21660130	CLCNKB	5.61e-89
cg21944455	GFAP	6.28e-89
cg08541297	IGFBP3	6.32e-89
cg17141902	NINJ1	6.43e-89
cg25390165	HOXA5	1.06e-88
cg19756430	C1orf86;RP11-181G12.4	1.08e-88
cg00319761	PKMYT1	1.14e-88
cg05490029	IL7	1.24e-88
cg02198625	RP4-576H24.4;SIRPB1	1.77e-88
cg07626482	CTB-147N14.6	1.88e-88
cg17068675	HLA-V	1.89e-88
cg16881676	RP11-977B10.2	1.89e-88
cg15829088	RP11-634B7.4	2.38e-88
cg24260847	RP11-863K10.7	2.4e-88
cg15692052	HTR2A	2.84e-88
cg18792803	RP11-212E4.1	2.94e-88
cg04399632	TXNDC11	3.7e-88
cg26135172	LIMD1	4.06e-88
cg22229016	SEMA3B	5.72e-88
cg19126169	RP11-849H4.4	5.74e-88
cg18297751	PCDHGA11	5.76e-88
cg24713529	SCO2	5.9e-88
cg08759026	MYEOV	8e-88
cg12151124	ICAM1	8.43e-88
cg26200585	PRX	9.26e-88
cg03537810	MIR661	1.02e-87
cg07086179	LCAT	1.06e-87
cg12149609	JPH2	1.07e-87
cg01905967	RP11-779O18.1	1.07e-87
cg19030554	NME3;EME2	1.25e-87
cg07625783	SLAMF8	1.25e-87
cg09571345	RP13-16H11.7	1.27e-87
cg12656312	OR56A4	1.3e-87
cg23054189	TRIM58	1.31e-87
cg01849466	Y_RNA	1.38e-87
cg07134230	RP11-284F21.7	2.17e-87
cg00834924	CTD-2262B20.1	2.18e-87
cg14175438	FAM3C;CYCSP19	2.86e-87
cg02772121	TRIM15	2.91e-87
cg19312404	RP11-650K20.2	2.95e-87
cg09421562	MPO	2.98e-87
cg10234693	WNT5B	3.46e-87
cg11533712	CELSR1	4.22e-87
cg15888472	CTD-2561B21.10	4.43e-87
cg20792256	OR7A17	5.98e-87
cg03349407	AURKAPS1	6.08e-87
cg07369374	AL591063.1	6.55e-87
cg16095155	CCHCR1	6.8e-87
cg04914221	MIR190A	7.56e-87
cg26864526	HRH1	8.04e-87
cg05617798	AURKB	1.02e-86
cg05628549	PRKCDBP	1.05e-86
cg27285599	ZNF750	1.06e-86
cg02336143	PCDHGA8	1.06e-86
cg19064523	TWIST1;AC003986.7	1.09e-86
cg02973993	COMMD7	1.22e-86
cg23679615	CCHCR1	1.29e-86
cg13271963	ANKRD2	1.63e-86
cg12782180	LEP	2.05e-86
cg18839637	PCDHGA3	2.3e-86
cg25114611	FKBP5	2.52e-86
cg06806080	CD47	2.77e-86
cg11267802	SPRR2G	3.06e-86
cg18748525	KCTD20	3.58e-86
cg13031097	XXbac-BPG248L24.12	4.24e-86
cg03405834	WFIKKN1	4.49e-86
cg23480341	SLPI	4.93e-86
cg07950000	GRIK1	5.02e-86
cg01949455	RP11-247A12.8;RP11-247A12.2	5.24e-86
cg24948792	SFXN3	5.28e-86
cg10900663	RP3-449M8.6	5.38e-86
cg02379079	LBP	5.99e-86
cg16616769	IQCK	6.1e-86
cg10828599	ZNF750	7.84e-86
cg05658487	IRX4;CTD-2194D22.4	8.19e-86
cg03943115	SPRR2D	9.07e-86
cg15354065	WIBG	9.36e-86
cg08656816	CCL5	1.02e-85
cg08484337	SNORA38	1.04e-85
cg00863099	LINC00152	1.24e-85
cg18022921	VEGFA	1.25e-85
cg03237166	ALDH1B1	1.25e-85
cg22222281	CD9	1.32e-85
cg22719037	SH2B3	1.38e-85
cg15685922	AL355388.1	1.7e-85
cg08402850	HAL	1.79e-85
cg22471129	SEC14L3	2e-85
cg21967668	FUT1;FGF21	2.05e-85
cg02207219	TRIM31	2.11e-85
cg24389386	HLA-H	2.42e-85
cg00221185	AL662797.1	2.62e-85
cg10601943	HCG4P11	3.02e-85
cg10043155	RP11-191A15.4	3.11e-85
cg06986734	PVT1_3	3.12e-85
cg01808879	TMPO-AS1	3.68e-85
cg05637536	SHE;TDRD10	4.28e-85
cg21757951	RP11-326C3.13;RP11-326C3.12	4.4e-85
cg17382048	CXCR5	4.41e-85
cg21002651	CASP1	4.55e-85
cg13568415	MIR4648	4.65e-85
cg26214645	SECTM1	4.77e-85
cg07611000	EHBP1L1	5.05e-85
cg12479098	PRKCDBP	5.4e-85
cg08445740	FAM71B	5.73e-85
cg00891995	SPRR2C	7.03e-85
cg19197419	UBE2C	7.13e-85
cg24911113	ZNF728	8.04e-85
cg25338563	KLF10	8.84e-85
cg00301372	YY1P2	9.5e-85
cg00026222	C1orf86;RP11-181G12.4	1.05e-84
cg26333652	C5orf38	1.28e-84
cg00940977	RP11-394I13.3	1.42e-84
cg22002216	ACSF2	1.45e-84
cg26164712	CXCR5	1.67e-84
cg15858970	ANKRD66	1.72e-84
cg21690050	NFIA-AS2	1.88e-84
cg14001664	ARHGAP42P1	1.94e-84
cg01917716	MS4A3	1.97e-84
cg08886154	PAX4	1.98e-84
cg16304656	AC147651.4	2.34e-84
cg14036776	RP11-863K10.7	2.35e-84
cg23167351	AL662797.1	2.38e-84
cg18975416	MIR4425	2.69e-84
cg14601357	PTK6	3.17e-84
cg03527802	AC009133.15;AC009133.24	3.84e-84
cg06637618	ATP2B4	3.9e-84
cg04312358	NUMBL	3.92e-84
cg11768167	HLA-F	4.02e-84
cg00370123	AC091729.7	4.16e-84
cg13209298	SEMA3B	4.36e-84
cg07330438	PPP1R2P2	4.75e-84
cg26065841	CHAC1	5.16e-84
cg24659854	CMB9-22P13.1	5.27e-84
cg20184247	HOXB5	5.41e-84
cg20994097	S100A10	5.77e-84
cg22122098	AC092641.2	5.97e-84
cg13592931	PCDHA10	6.71e-84
cg16609966	RP11-863P13.5	7.46e-84
cg06606386	CTD-3252C9.4;MIR24-2;MIR27A;MIR23A	8.85e-84
cg08378932	TM4SF4	9.55e-84
cg06204229	ITIH4	9.64e-84
cg23919924	OR10G8	9.84e-84
cg19505827	TSPAN32	1.54e-83
cg20097219	RP11-353N14.7	1.68e-83
cg02945646	AP1G2	1.75e-83
cg18054674	PCDHGA6	1.76e-83
cg16055410	PSORS1C3	1.78e-83
cg25848158	S100A10;AL591893.1	2e-83
cg27285720	GBP4	2.5e-83
cg21832150	PLEKHN1	2.62e-83
cg07665060	C19orf33	2.63e-83
cg18675097	NKAPL	2.67e-83
cg17295878	RP11-353N14.7	2.87e-83
cg02297967	LINC00968	2.95e-83
cg00030420	SLC25A2	2.97e-83
cg09788352	RP11-315D16.2	3e-83
cg12015737	HOXA5	3.19e-83
cg20026633	CDHR4	3.19e-83
cg07161369	AC006033.22	3.35e-83
cg22076757	MYBPHL	3.37e-83
cg06468347	ITGAE	3.47e-83
cg18228531	RP11-982M15.6	3.84e-83
cg19565262	NAT8	3.92e-83
cg16383109	RHBDF1;MPG	4.03e-83
cg19828516	GPR132	4.17e-83
cg08171351	AC006946.15	4.36e-83
cg05253480	IL17RE	5.33e-83
cg08872550	CA2	5.44e-83
cg04400145	SIRPA	5.76e-83
cg18185189	MIR200C;MIR141;U47924.29	6.31e-83
cg12922492	INHBA-AS1	6.58e-83
cg09232937	IRX1	6.68e-83
cg18294707	RNASE2	6.88e-83
cg10249734	SECTM1	7.86e-83
cg00864530	LINC00517	8.19e-83
cg06349754	PLEKHG4	9.21e-83
cg05158615	NPY	9.37e-83
cg02047803	HDAC3	1.08e-82
cg01827195	NYAP2	1.15e-82
cg01426475	RAPGEF5	1.19e-82
cg19037350	PCDHGA4	1.29e-82
cg06160397	MIR4648	1.76e-82
cg23735482	RP11-435M3.2;MYO3A	1.76e-82
cg19537184	MIR526A1;MIR520C	1.94e-82
cg17269633	C17orf104	1.95e-82
cg09635533	RP11-536C10.21;RP11-597A11.3	2.2e-82
cg07538206	C2CD2	2.23e-82
cg12580445	LOX	2.44e-82
cg15719255	LRRC25	2.49e-82
cg25710298	AC079779.4	4.02e-82
cg07618085	RP11-353N14.7	5.62e-82
cg26333564	RP11-982M15.6	6.15e-82
cg05989861	PROM2	6.53e-82
cg26138144	LGALS1	6.87e-82
cg06852461	AL035209.1	7.26e-82
cg16719560	VAMP5	8.04e-82
cg10811945	NTRK1	8.8e-82
cg15686949	SUB1	9.68e-82
cg06968788	SDC4P	9.95e-82
cg09315887	SYPL1	1.06e-81
cg20128928	TACR3	1.1e-81
cg19241878	LINC00483;MIR8059	1.15e-81
cg16210447	CASS4	1.32e-81
cg12479660	SEMA3B	1.34e-81
cg27320005	SLC25A2	1.59e-81
cg16624994	FAM107B	1.65e-81
cg20547131	MIR409;MIR412;MIR369;MIR410;MIR656	1.73e-81
cg25259754	FCRL3	1.73e-81
cg02811197	TMEM213	1.86e-81
cg07080372	PANO1	2.06e-81
cg22727124	MESP2	2.4e-81
cg05033369	FCRLA	2.4e-81
cg08037664	F8A1	2.59e-81
cg17152981	GPR6	2.92e-81
cg12984369	MIR5188	3.06e-81
cg23808165	CTA-243E7.3	3.31e-81
cg08857994	ARHGAP42P2	3.32e-81
cg06883126	CH17-140K24.1	3.4e-81
cg06510261	GCSAM;RP11-757F18.5	3.93e-81
cg26399164	CCND1	3.96e-81
cg14614094	EXOSC2	4.63e-81
cg00525931	RRN3P2	4.68e-81
cg02501155	RP11-679B19.2	4.69e-81
cg04625873	CXCR5	5.31e-81
cg13745870	SPATA12	6.68e-81
cg05190002	CTDSP1	7.17e-81
cg25564800	KPNA1	7.75e-81
cg20363347	MYEOV	9.43e-81
cg23486853	LIF	9.93e-81
cg10298741	AC132068.1	1.03e-80
cg06966811	OTX2	1.17e-80
cg04365980	CLEC3A	1.21e-80
cg18626954	MIR7159	1.52e-80
cg04578903	NBPF2P;HS6ST1P1	1.53e-80
cg11052143	ALS2CR11	1.54e-80
cg17134153	FCRL3	1.55e-80
cg21936959	MRGPRF	1.66e-80
cg25627226	DLGAP1	1.76e-80
cg17565967	RBBP8NL;RP5-908M14.5	1.8e-80
cg13240116	HOXA-AS2	2.02e-80
cg08437570	MIR146B	2.41e-80
cg12699599	PHGR1	2.42e-80
cg14334441	XXbac-BPGBPG24O18.1	2.49e-80
cg02102456	LINC01104	2.54e-80
cg10906826	OR6B3	2.69e-80
cg00933411	DLC1	2.72e-80
cg10828284	MOV10L1	2.82e-80
cg11402586	ITGA2	3.08e-80
cg06764239	RP4-712E4.1;RP4-712E4.2	3.26e-80
cg05501742	RHBDF1;MPG	3.45e-80
cg17919966	SNORA63	4.01e-80
cg04904815	TSPO2	4.31e-80
cg04204002	TMPRSS3	4.57e-80
cg13783238	MIR15B;MIR16-2	4.68e-80
cg06136702	PSORS1C1	5.57e-80
cg07316846	AC018730.4	5.6e-80
cg25797454	RAET1K	5.62e-80
cg13597417	LGALS9C	5.91e-80
cg03046705	C5orf56	5.95e-80
cg17724147	RP11-319E12.1	6.1e-80
cg03449150	SPRR2F	6.99e-80
cg05149307	RASAL1	7.75e-80
cg13316191	CDCA7L	8.52e-80
cg26534677	CCDC25;RNU6-1276P	9.32e-80
cg15996534	ZNF300P1	1.04e-79
cg25144135	TNFRSF18	1.05e-79
cg07948480	RALB	1.18e-79
cg19678828	CYYR1	1.31e-79
cg07899983	NAT8B	1.41e-79
cg23746497	LINC00577	1.53e-79
cg15909319	RP11-214O1.1	1.73e-79
cg09148649	MRGPRE	1.88e-79
cg10919204	CDH6	1.94e-79
cg14345012	MIR663A	1.97e-79
cg23197007	PPP1R18	1.97e-79
cg26969933	C6orf47;Y_RNA	1.98e-79
cg09802818	C12orf80;LINC00592	2.05e-79
cg08642731	C10orf71-AS1;C10orf71	2.2e-79
cg00231528	PIK3CD-AS1	2.51e-79
cg25027798	AC005609.17;PCDHA13	3.09e-79
cg00802237	SERPINA1	3.63e-79
cg19940077	GPR25	3.92e-79
cg21439672	C1RL-AS1	3.92e-79
cg07925415	RP5-912I13.1	3.96e-79
cg17159058	CLN8	4.8e-79
cg07371589	RP11-68I18.10	5.07e-79
cg26928531	HLA-DRA	5.39e-79
cg14956327	DDO	5.52e-79
cg27222669	ABCC3	5.63e-79
cg04002454	SP140L	5.71e-79
cg06784539	TMEM213	6.13e-79
cg05305434	LSP1	6.2e-79
cg19670290	HDDC3	6.38e-79
cg24858591	KIAA1143;KIF15	6.55e-79
cg06025938	AIM1	7.3e-79
cg18020072	SNORA38	7.86e-79
cg13563074	OVCH2	8.09e-79
cg16126079	DNHD1	8.53e-79
cg23316449	PAPLN	8.55e-79
cg07143805	PMEPA1	8.7e-79
cg22502502	TRIM38	9.88e-79
cg11436222	HIST1H3E	1.02e-78
cg07057579	LINC01197	1.02e-78
cg14434109	RP11-374P20.4	1.07e-78
cg08761324	TIAL1	1.7e-78
cg06407111	RP11-552F3.9	1.91e-78
cg16732787	DUSP5P1	1.93e-78
cg10667970	FBXO6	1.98e-78
cg01785473	FAM129B	2.02e-78
cg09740133	RP11-180M15.7	2.12e-78
cg25161912	RPSAP52	2.18e-78
cg23631538	CHI3L2	2.19e-78
cg02553054	SMARCD1	2.54e-78
cg09329516	RN7SL105P	2.58e-78
cg09379935	P2RY6	2.76e-78
cg26620655	AC091729.7	2.93e-78
cg23449696	ZIC4	3.04e-78
cg01005439	NOL3	3.04e-78
cg00773370	LTBR	4.48e-78
cg06222087	MIR3195	4.81e-78
cg15099037	SLC11A1	5.25e-78
cg18305324	SNORA38	5.83e-78
cg20366906	PCDH8	5.85e-78
cg08094571	CTD-3222D19.8	6.39e-78
cg11351522	HIST1H4J	6.51e-78
cg09563102	FAM110C	6.68e-78
cg03045323	SWSAP1	7.74e-78
cg15231794	TNFAIP8L1	8.46e-78
cg12863545	PIK3R5;CTB-41I6.1;CTB-41I6.2	8.7e-78
cg06650260	NR0B2	8.87e-78
cg17122437	FAM107B	9.28e-78
cg11620409	MYRF	9.6e-78
cg23536681	RP11-2H3.7	1.06e-77
cg02364703	Metazoa_SRP	1.11e-77
cg12798992	MIR3939;FGFR1OP;RP11-517H2.6	1.17e-77
cg22405653	KRTAP21-1	1.36e-77
cg20810478	TRIM58	1.39e-77
cg13694927	HOXA5	1.6e-77
cg11375547	TNNI3;CTD-2587H24.5	1.62e-77
cg13290149	RBBP8NL;RP5-908M14.5	1.7e-77
cg07039560	SLC25A2	1.73e-77
cg23676369	CASS4	1.73e-77
cg26095658	FIGLA	1.75e-77
cg20765441	SLC17A2	1.78e-77
cg15044453	RNU6-302P	1.81e-77
cg26300461	RP11-241I20.5	2.14e-77
cg14267780	KRTAP5-4	2.65e-77
cg19433021	NFYB	3.13e-77
cg02876062	FAM107B	3.14e-77
cg20943461	TMC8	4.03e-77
cg19274606	C6orf223	4.08e-77
cg04670168	MYOZ3	4.34e-77
cg26914705	C22orf24	4.35e-77
cg02591487	SLC2A3	4.72e-77
cg20591728	HOXB3;HOXB6	4.85e-77
cg22340508	CTC-451A6.5	5.67e-77
cg27560561	AC018730.4	5.74e-77
cg03944810	KLF7	5.98e-77
cg09820378	PCDHA6	6.43e-77
cg09960641	HPN-AS1	6.65e-77
cg19542849	AC093373.1	6.72e-77
cg10396673	RP11-196G11.3	6.99e-77
cg05631194	PSORS1C3	7.62e-77
cg00451397	GTF2A1L	8.89e-77
cg06892907	KB-1732A1.1	9.09e-77
cg03234702	HIST1H3E	9.18e-77
cg26523175	PDZK1IP1	9.42e-77
cg00411072	RP11-357H14.16	1.04e-76
cg26233914	ITGAX	1.06e-76
cg16677191	GLRX	1.07e-76
cg15427004	ACAA1;MYD88	1.29e-76
cg03730709	Metazoa_SRP	1.3e-76
cg05372727	LINC00460	1.33e-76
cg03287574	IRX4;CTD-2194D22.4	1.34e-76
cg01026898	AC068858.1	1.37e-76
cg02766539	RP11-619I22.1	1.38e-76
cg08414570	SLC24A2	1.45e-76
cg01820374	LAG3	1.48e-76
cg11053466	RP5-940J5.9	1.51e-76
cg23547157	RP13-554M15.5	1.65e-76
cg10055471	NR0B2	1.76e-76
cg03465179	IGHA2	1.94e-76
cg16122628	RP11-420L9.5	2.1e-76
cg24168221	CST9	2.63e-76
cg04186657	HLA-F	2.83e-76
cg14030904	ZC3H12D	3.17e-76
cg09432376	APOL6	3.79e-76
cg14792160	LCE1E	4.4e-76
cg00909232	SLC6A12	4.64e-76
cg25316172	CTC-248O19.1	4.84e-76
cg05926640	RP11-443B7.2	5.09e-76
cg19431346	CHL1-AS1	5.48e-76
cg02650767	OR2B11	5.7e-76
cg14303122	CASS4	6e-76
cg00852033	NPW	6.25e-76
cg12551029	SLC16A1-AS1	7.04e-76
cg22600043	RSPO2	7.62e-76
cg24040989	SYNPO	7.88e-76
cg08528170	CTD-3252C9.4;MIR24-2;MIR27A;MIR23A	8.38e-76
cg00574196	LDLRAD2	8.47e-76
cg01472101	CLEC10A	8.47e-76
cg19645639	SLC16A1	8.77e-76
cg12538674	HOXA-AS2	9.09e-76
cg03762081	KLK10	1.13e-75
cg14157435	AC007362.3	1.21e-75
cg05937737	SLC7A14	1.21e-75
cg10790685	VIM	1.29e-75
cg26763394	LZTFL1	1.3e-75
cg02698576	RP11-68I18.10	1.31e-75
cg11623855	KIAA1549L	1.33e-75
cg00440032	LINC00944	1.69e-75
cg07501988	CTB-186G2.1	1.76e-75
cg11686427	PCDHGB5	1.78e-75
cg22079077	C15orf62	1.79e-75
cg02937674	RP11-707M1.1	2.02e-75
cg14622819	CXCL10	2.07e-75
cg17163363	OR52B2	2.22e-75
cg20060632	RP11-84C10.4;SLC39A2	2.42e-75
cg13753460	MIR382;MIR134;AL132709.5;MIR485;MIR323B	3.19e-75
cg08715226	TNFRSF6B	3.22e-75
cg23238834	CCHCR1	3.82e-75
cg10343787	PLLP	3.93e-75
cg12161331	MIR200C;MIR141;U47924.29	4.14e-75
cg18127922	HOXB5	4.26e-75
cg04021074	FAM107B	4.44e-75
cg07426848	S100A3	4.53e-75
cg19343088	AIM1	4.77e-75
cg07323447	CES4A	5.04e-75
cg19312305	MIR122	5.38e-75
cg20146541	TRIM58	6.14e-75
cg07496545	SLC25A2	6.57e-75
cg15410441	AP006547.3	6.64e-75
cg11299991	PTX3	6.84e-75
cg23242944	GFAP	7.51e-75
cg22687982	CTD-2335A18.2	7.51e-75
cg02043070	ADSSL1	7.81e-75
cg02384546	ZNF750	8.55e-75
cg07350057	GGT1	9.52e-75
cg10702669	RP11-20I23.1	9.88e-75
cg02589501	USP46-AS1	9.99e-75
cg11239575	ITGAE	1.09e-74
cg23205676	ESPNP	1.1e-74
cg25767433	CUTA;SYNGAP1	1.1e-74
cg09643544	ZNF177	1.14e-74
cg05509777	TSPAN32	1.2e-74
cg10915263	RP11-157G21.2	1.26e-74
cg17125688	RHOB	1.3e-74
cg17475456	CLEC2B	1.49e-74
cg20728490	DNTT	1.69e-74
cg04044418	VPS9D1	1.74e-74
cg24174145	KRT80	1.96e-74
cg23365392	AC005071.2	2.1e-74
cg01145653	RP11-158I23.1	2.9e-74
cg05133853	HBBP1	3.1e-74
cg02061553	ARHGEF16	3.1e-74
cg05949640	FAM193A	3.27e-74
cg04446762	CMB9-22P13.1	3.41e-74
cg13802966	CASP1	3.61e-74
cg27346707	MEGF10	3.74e-74
cg22585988	PVRL4	3.89e-74
cg17007693	RP11-703I16.3	4.05e-74
cg14158968	RP11-483L5.1	4.16e-74
cg01246266	TMC8	4.45e-74
cg15952370	OR8D2;OR8D2	4.68e-74
cg07598952	NMBR;RP11-137J7.2	4.8e-74
cg19154027	RP11-732A21.3	4.86e-74
cg08003887	RP11-266K4.1	5.12e-74
cg20678353	C15orf53	5.53e-74
cg21859290	PITPNM1	6.1e-74
cg12359384	FERMT1	6.26e-74
cg16768376	ST6GALNAC4P1	6.99e-74
cg05245070	RP11-452I5.2	7.74e-74
cg11435943	SERPINB12	7.83e-74
cg18352935	OR51F2	8.09e-74
cg05226740	C1orf147	8.26e-74
cg15895690	C14orf39	8.68e-74
cg11721554	MIR377	1e-73
cg23705224	RP11-605F22.2;CTXN2;SLC12A1	1.03e-73
cg03568305	MIR6884;SNORD124	1.04e-73
cg05201970	HCN1	1.08e-73
cg26204477	CTB-58E17.3	1.11e-73
cg14022057	AC008063.2	1.2e-73
cg20674638	ITGA2	1.21e-73
cg21886186	POU2F3	1.23e-73
cg26818786	CARD6	1.26e-73
cg19718563	CTD-2162K18.3	1.26e-73
cg14097773	DCUN1D2-AS	1.28e-73
cg24046474	SNORA65;LRSAM1	1.33e-73
cg03447083	CES3	1.36e-73
cg19729479	HCG4P8	1.37e-73
cg16513459	KCNAB3	1.41e-73
cg00079598	OR6M1	1.48e-73
cg01329690	DSCR9	1.58e-73
cg05796704	FBXO44	1.6e-73
cg14781189	KCNH7	1.62e-73
cg01961752	TTLL10	1.63e-73
cg03542031	SNORD99;SNORA61	1.68e-73
cg10001720	LAPTM5	1.68e-73
cg08415592	APOL1	1.68e-73
cg09578475	ZNF177	1.89e-73
cg06567855	ATOH8	1.9e-73
cg14672084	RN7SL68P;AC008781.1	2.07e-73
cg14022913	NEIL3	2.09e-73
cg21653641	MAMSTR	2.1e-73
cg22932220	NME1-NME2	2.1e-73
cg08874609	MEGF10	2.2e-73
cg02455346	HLX-AS1	2.22e-73
cg24005701	TRIM64B	2.25e-73
cg16172923	MIR4655	2.39e-73
cg14396214	LIME1;RP4-583P15.14	2.75e-73
cg00467296	OR51A7	2.75e-73
cg11953516	FNDC4;GCKR	3.2e-73
cg09406760	MIR661	3.29e-73
cg05020510	NOV	3.4e-73
cg07816637	PCDHGA9	3.44e-73
cg02382532	C6orf132	3.44e-73
cg16662451	FBXW10	3.66e-73
cg20442289	C5orf15	3.66e-73
cg24995083	CLMN	3.75e-73
cg08678055	TBC1D21	4.32e-73
cg01807825	GK2	4.89e-73
cg04617948	RP11-288A5.2;FOXI2	5.6e-73
cg14216068	HOXA-AS2	5.96e-73
cg09701700	MIR146B	6.85e-73
cg18773937	IL1B	7.23e-73
cg07168939	JRK	7.8e-73
cg04403474	CTB-60B18.17;CGB5	8.39e-73
cg23542902	RP11-135A1.3	9.46e-73
cg07185174	OGFR	9.61e-73
cg20817131	HOXA5	9.72e-73
cg12380764	IL19	9.77e-73
cg00166915	MEG8;MEG8_1	1.02e-72
cg27599792	PCDHGA10	1.05e-72
cg19731612	NSD1	1.06e-72
cg10637995	BPIFA4P	1.11e-72
cg16705627	SOX1	1.18e-72
cg14549976	RP11-154H12.3	1.2e-72
cg07048519	CDRT1	1.25e-72
cg11009736	MARCO	1.33e-72
cg20672981	HOTTIP_3	1.36e-72
cg21541083	STXBP2	1.37e-72
cg23666117	C6orf47;Y_RNA	1.42e-72
cg14739664	SLC25A2	1.57e-72
cg06942685	ZSCAN5A;AC006116.21;ZNF542P	1.68e-72
cg07148207	RP11-16B9.1	1.71e-72
cg10463299	CASS4	1.72e-72
cg16532262	KRT3	1.79e-72
cg11807006	ACAP1	1.9e-72
cg02029665	LINC00899	1.93e-72
cg08697689	SLITRK1	2e-72
cg24018633	TRAJ38;TRAJ37	2.03e-72
cg23256150	NR1H4	2.15e-72
cg07286253	EPB41L4A-AS1;SNORA13	2.28e-72
cg02291365	IRX1P1	2.29e-72
cg01586116	NCKAP5	2.39e-72
cg26534425	IL18	2.42e-72
cg11108890	VAMP5	2.96e-72
cg01722932	MTNR1B	3.54e-72
cg13995230	AL132709.3;AL132709.7;AL132709.9;MIR654;MIR376B;AL132709.6;MIR300	3.54e-72
cg15635368	INPP1	3.95e-72
cg06524377	RP11-20G13.1	4.01e-72
cg00804078	DDO	4.15e-72
cg06032302	AC116366.5	4.18e-72
cg19248557	HLA-DRA	4.32e-72
cg26429636	AZGP1	5.2e-72
cg12738765	OR5M10	5.29e-72
cg23348723	PPP1R17	5.38e-72
cg00175487	MIR299;AL132709.2;MIR1197;MIR323A	5.41e-72
cg26651122	MT2A	5.73e-72
cg23072383	SLC35E4	5.77e-72
cg11304234	IL18	5.98e-72
cg24387864	CCND1	6.89e-72
cg20421191	HCG25	7.29e-72
cg07138512	RAP1GAP	7.36e-72
cg14489570	LY6E	7.37e-72
cg13704497	SNORA38	7.59e-72
cg21468416	NEK6	7.73e-72
cg25263140	AIM1	7.81e-72
cg27641628	TMEM140	8.93e-72
cg07717903	PCDHGA6	1.02e-71
cg06800840	OASL	1.1e-71
cg01311222	HEG1	1.1e-71
cg19103704	FCGBP	1.15e-71
cg24782497	KIAA1683	1.17e-71
cg01664864	DIO3OS;MIR1247;DIO3	1.33e-71
cg11429044	CTD-3252C9.4;MIR24-2;MIR27A;MIR23A	1.42e-71
cg04792712	MTMR7	1.46e-71
cg13106758	RP11-424I19.2	1.54e-71
cg00191458	LINC01366	1.6e-71
cg09993145	RUNX3	1.69e-71
cg14010720	PTK6	1.73e-71
cg13335054	LINC00887	1.74e-71
cg05689582	C2orf57	1.79e-71
cg07056155	RP11-1078H9.1;LINC00642	1.93e-71
cg07604732	CLEC19A;AC003003.5	2e-71
cg16791528	REG1A	2.03e-71
cg12285118	FAM107B	2.06e-71
cg19161124	DPP6	2.16e-71
cg20817822	MIR29B2	2.22e-71
cg10230591	RP11-478K15.6	2.31e-71
cg12785694	MIR15B;MIR16-2	2.33e-71
cg07713361	APOL1	2.53e-71
cg13755776	RP13-726E6.2	2.59e-71
cg26509318	KDM2B	2.7e-71
cg09967329	PRM2	2.74e-71
cg13651876	CHCHD4P3	2.75e-71
cg10522125	ITGAL	3.06e-71
cg24387542	LGALS9B	3.07e-71
cg06790305	KRTAP19-8	3.07e-71
cg12545687	PCDH8	3.39e-71
cg07804289	SPRR2C	3.45e-71
cg22721796	TMCO6	3.79e-71
cg12179658	HRH1	3.79e-71
cg02810967	DCAF16	4.56e-71
cg22530293	PANK4	4.66e-71
cg00750630	RP11-255G12.2	5.22e-71
cg26279070	RHOQP3	5.34e-71
cg25631489	PHC3	6.66e-71
cg11614451	RP11-432B6.3	6.93e-71
cg16072688	PENK	7.31e-71
cg12422154	TRIM15	7.41e-71
cg04118910	RASA3-IT1	7.86e-71
cg18806997	RP11-269F19.2;SNORD46;SNORD38A;SNORD38B;SNORD38B	7.89e-71
cg23743911	RNF103-CHMP3	9e-71
cg26815454	GRAP2	9.16e-71
cg00607627	LAT	9.56e-71
cg18795955	CCHCR1;TCF19	1.02e-70
cg13257690	RP11-168L7.3	1.03e-70
cg07838048	MTSS1L	1.04e-70
cg06373470	ADIRF-AS1;RP11-96C23.15	1.05e-70
cg04452362	RP11-102K13.5	1.08e-70
cg12550597	COLGALT1	1.11e-70
cg05410198	RTP1	1.15e-70
cg19628233	RUVBL1	1.25e-70
cg05865548	MIR543;MIR495	1.26e-70
cg23696248	MIR8085	1.32e-70
cg03970229	MTNR1B	1.33e-70
cg00492070	CD47	1.37e-70
cg24931346	C1QB	1.45e-70
cg13281248	CTBP1	1.57e-70
cg05845141	CTB-52I2.7	1.58e-70
cg06023161	SNORA38	1.65e-70
cg05324273	RP11-179B15.6	1.66e-70
cg14766620	BHLHE40	1.73e-70
cg00665029	FBXO25	1.79e-70
cg13138089	ECEL1P2	1.9e-70
cg25937451	KRTAP10-5	1.93e-70
cg21527411	GLYAT	2e-70
cg06595154	MRVI1	2.04e-70
cg13003786	CSNK1D	2.29e-70
cg00083659	TEX33	2.33e-70
cg04012618	CTB-31N19.4	2.41e-70
cg15957004	SPDYC	2.48e-70
cg02861056	AC015969.3;PLEK	2.52e-70
cg21816539	GRIK1	2.53e-70
cg20966659	NUP210P1	2.57e-70
cg10940251	MIR208A	3.09e-70
cg03762549	TMEM61	3.26e-70
cg25095994	SP140L	3.5e-70
cg06574296	ESPNL	3.67e-70
cg20429172	TRIM58	3.72e-70
cg01493517	IFFO1	3.72e-70
cg16518772	AC009133.15;AC009133.24	4.19e-70
cg06555227	MIR153-2	4.21e-70
cg26302178	HLA-G	4.34e-70
cg27105465	HCRT	4.59e-70
cg02623400	ELAVL4	4.68e-70
cg02704949	FXYD3	4.7e-70
cg05221167	ZNF560;CTC-543D15.3	5.02e-70
cg11159295	PPM1M	5.22e-70
cg18757155	ADAM28	5.33e-70
cg08782899	ARL16	5.65e-70
cg25756470	NCF4	6.17e-70
cg10566578	RP11-173P15.10;UNC119B	6.2e-70
cg06438797	CA7	6.27e-70
cg15896939	RAB25	6.48e-70
cg08273740	TSPAN32	6.49e-70
cg06422757	KCTD20	6.64e-70
cg13209907	WFDC9	6.71e-70
cg15428620	PDZD7	6.72e-70
cg17891505	LINC01111	7.13e-70
cg14366598	IL25	7.3e-70
cg11340260	GP1BA	7.37e-70
cg11393848	C1QC	7.44e-70
cg22897715	RP11-872D17.8	7.89e-70
cg16557111	PVRL4	7.95e-70
cg25073708	C9orf106	1.04e-69
cg05109569	HOXA-AS2	1.06e-69
cg02639181	KIDINS220	1.06e-69
cg27137836	RP11-158I23.1	1.09e-69
cg03738025	LINC00577	1.19e-69
cg01755342	CALML6	1.23e-69
cg18550003	FUT1;FGF21	1.23e-69
cg17670263	MIR520C;MIR518C	1.63e-69
cg02624836	AC023115.2	1.71e-69
cg21304163	FXYD3	1.94e-69
cg02303941	RP11-60C6.5	1.96e-69
cg12166080	RP11-709A23.1	1.97e-69
cg05229035	RNU6-244P	2.04e-69
cg25918833	OR51E2	2.07e-69
cg11332928	TCTEX1D4;BTBD19	2.08e-69
cg08324925	CSF2	2.21e-69
cg16587616	KHDRBS2	2.32e-69
cg24967096	AL662797.1	2.57e-69
cg18074184	SLC10A4	2.69e-69
cg02101355	MIR125B1	2.81e-69
cg07237979	LSP1	2.95e-69
cg08256781	ACSBG2	2.95e-69
cg23581088	RP1-140K8.5	3.29e-69
cg21529807	CEACAM4	3.3e-69
cg17799563	ABHD8	3.67e-69
cg11343506	ELF5	3.79e-69
cg10290276	ASCL2	4e-69
cg22092521	CFD	4.01e-69
cg25123566	PCED1B-AS1	4.1e-69
cg09015246	CIITA	4.32e-69
cg00004421	EIF4A1;RP11-186B7.4	4.6e-69
cg25509643	CRIP1P2	5.06e-69
cg02121427	LRRC15	5.56e-69
cg16488065	LRRN2	5.6e-69
cg11448683	TCTEX1D4;BTBD19	6.2e-69
cg08284564	BCAR1	6.25e-69
cg04505809	ELMO3	7.28e-69
cg23842170	EPHA5-AS1	7.46e-69
cg05251814	MIR5587	7.81e-69
cg26027170	RP11-690G19.4	8.37e-69
cg02950892	ANKRD2	8.5e-69
cg22014579	C19orf33	8.76e-69
cg03771004	NR1H4	9.02e-69
cg12848614	SRSF5	9.74e-69
cg02866106	CHRM2	9.85e-69
cg19395441	C12orf43	1.03e-68
cg09687907	DDIT3	1.07e-68
cg01530803	SDC4P	1.26e-68
cg12549180	RP11-54O7.2	1.27e-68
cg01687040	DCD	1.36e-68
cg13827582	RP11-20G13.1	1.39e-68
cg07880384	CFB	1.42e-68
cg25507767	TMEM213	1.46e-68
cg15122993	AC005609.18	1.5e-68
cg14276379	RP11-49O14.2	1.52e-68
cg11079711	KRT26	1.54e-68
cg04340203	RNU6-9	1.57e-68
cg23840219	RNU6-653P	1.58e-68
cg03828109	P2RX5-TAX1BP3;P2RX5	1.74e-68
cg12530503	MIR9-3	1.79e-68
cg09080522	PARVG	1.86e-68
cg15726807	CTC-435M10.3;TMEM91	1.92e-68
cg21381845	AC147651.4	2.12e-68
cg02825728	CLDN17	2.26e-68
cg04633676	CCL2	2.35e-68
cg02707176	PCDHGA11	2.37e-68
cg09549015	F3	2.51e-68
cg12560128	OAS2	2.76e-68
cg02873991	C12orf77	3.15e-68
cg15001032	DDC	3.15e-68
cg23016129	SPAG6	3.25e-68
cg20821276	HELZ	3.29e-68
cg03593550	MIR935	3.31e-68
cg26400840	RP11-1149O23.3	3.36e-68
cg03578548	RP13-60M5.2	3.56e-68
cg15893493	RP11-539E17.5	3.72e-68
cg25942450	RP11-546B8.6;TLX3	3.74e-68
cg08592890	BCL7C;AC106782.20;CTF1	3.97e-68
cg00310463	KY	4.09e-68
cg03134947	LAT	4.16e-68
cg05972352	RP11-120K24.4;RP11-120K24.5	4.38e-68
cg15507486	IGFL3	4.94e-68
cg09032973	PCDHA1	5.19e-68
cg02452732	IFI35	5.9e-68
cg04098585	CD28	6.05e-68
cg06271561	ALPK3	6.24e-68
cg26099316	ITIH3	6.88e-68
cg14507845	RP11-473E2.4	6.89e-68
cg16686951	CD40	7.18e-68
cg17758721	SNRPB	7.76e-68
cg04833514	SLC6A9	7.81e-68
cg05130485	CASP8	7.93e-68
cg23350294	PENK	7.99e-68
cg03233940	CTD-2086O20.1	8.4e-68
cg26952618	TVP23A	8.84e-68
cg09530156	RP11-626H12.2	8.96e-68
cg12700039	RP11-353N14.7	9.54e-68
cg21107581	FUT1;FGF21	1.01e-67
cg13019143	DLX6	1.02e-67
cg01799653	ANKRD33B	1.1e-67
cg09469643	RP11-707M1.1	1.1e-67
cg18599081	RP11-24F11.2;CCRL2	1.15e-67
cg02357541	SEC61A1	1.15e-67
cg01412469	INHBA-AS1	1.17e-67
cg25424194	CYP2A6;CYP2A7	1.19e-67
cg10638604	AQP9	1.29e-67
cg07785717	MIR935	1.32e-67
cg20434178	DLX2	1.55e-67
cg08893109	CYTH3	1.68e-67
cg18816996	COL23A1	1.7e-67
cg13856573	GNG3	1.7e-67
cg01192875	SNORA24	1.77e-67
cg24829483	C1QTNF7	1.82e-67
cg24695890	AC004870.5	1.93e-67
cg24372174	HTR3E-AS1	1.97e-67
cg02692052	TNFRSF10A	2.01e-67
cg13741668	RASEF	2.02e-67
cg17546247	ZIC4	2.12e-67
cg17802464	SEC14L3	2.13e-67
cg20378687	KRT8P12	2.21e-67
cg03333149	OR7E47P	2.26e-67
cg08802513	RP11-161P17.2;POM121L13P	2.34e-67
cg03673688	RNF215;RP4-539M6.21	2.46e-67
cg01015123	OTOL1	2.59e-67
cg03154077	MIR6891;XXbac-BPG248L24.12	2.72e-67
cg02652579	CUTA;SYNGAP1	2.8e-67
cg12277416	AC006130.3	2.85e-67
cg06525987	GABRG2	3.05e-67
cg01367899	RP11-670E13.3	3.05e-67
cg05792169	ADAMTS7P4	3.28e-67
cg11427534	AC004775.5	3.3e-67
cg27248887	NDUFS1;uc_338;snoZ196;SNORD51;SNORA41	3.48e-67
cg05719140	LINC00466	3.51e-67
cg00144335	Z95704.3	3.97e-67
cg11631579	PTMAP2	3.98e-67
cg23111544	REG1A	4.03e-67
cg12532001	DLEU2_6;DLEU1;DLEU1_1	4.23e-67
cg23267890	KCNQ1	4.3e-67
cg00074348	APLNR	4.57e-67
cg00012698	RP11-3D4.2	4.72e-67
cg20260127	RP11-700P18.1	4.92e-67
cg08519905	CD9	5.16e-67
cg04096619	SEMA5A;SNORD123	5.52e-67
cg06530558	UNC13C	5.53e-67
cg17060964	OR5AS1	5.56e-67
cg14770407	CASS4	5.7e-67
cg03608003	ANKRD2	5.76e-67
cg00091794	GABBR2	5.93e-67
cg18363008	TM4SF5	6.01e-67
cg11344950	THEM5	6.69e-67
cg08575688	CCL20	6.69e-67
cg12996417	PRSS48	6.77e-67
cg07708721	SNORA38	7.71e-67
cg12441928	CCR1	8.17e-67
cg08872064	SSUH2	8.8e-67
cg18586886	AL662797.1	9.64e-67
cg04360793	ELTD1	9.84e-67
cg16780771	MIR6504	9.93e-67
cg19890739	GINS2	1.01e-66
cg21241675	RP11-305L7.3	1.06e-66
cg06866232	OR51L1	1.07e-66
cg23365801	KCNAB3	1.08e-66
cg16565154	TNFAIP8L2;SCNM1	1.12e-66
cg00620976	RP11-351A20.1	1.13e-66
cg05307477	RP11-501J20.3;KCNK18	1.13e-66
cg13195526	IL22	1.15e-66
cg10683527	NEIL3	1.19e-66
cg09540102	NME3;EME2	1.2e-66
cg25626375	OC90	1.23e-66
cg00031187	RP11-771K4.1	1.32e-66
cg16354688	CLCNKB	1.35e-66
cg04003327	ESPNL	1.39e-66
cg23980760	ACCSL	1.42e-66
cg08363794	HOXD9	1.45e-66
cg21027517	TSPAN32	1.51e-66
cg14290445	MAMDC4	1.54e-66
cg19280776	PAG1	1.58e-66
cg16361876	LCE2D	1.58e-66
cg02593932	GALNT13	1.6e-66
cg08986840	RP11-675F6.3	1.62e-66
cg24113818	RASA3-IT1	1.62e-66
cg00347369	STMN2	1.64e-66
cg03960217	LCE2C	1.67e-66
cg00962755	PHLDA3	1.67e-66
cg13974761	LCE2A	1.73e-66
cg25145687	KRTAP5-1	1.76e-66
cg03496157	RP11-87C12.5	1.81e-66
cg00705992	HOXA11;HOXA11-AS1_4;HOXA11-AS1_5	1.85e-66
cg13709639	TUBA1B	1.86e-66
cg27250427	RP5-856G1.1	1.89e-66
cg09044743	PANK4	1.9e-66
cg19250571	OR51S1	1.92e-66
cg07412281	C1QTNF8	1.93e-66
cg21899542	ATP5G1P1	2.07e-66
cg16349774	PERM1	2.17e-66
cg25850044	RP11-16E12.1	2.2e-66
cg02102075	LA16c-359F1.1;RAB11FIP3	2.21e-66
cg04193415	LIF	2.3e-66
cg06594404	RP11-2H3.7	2.49e-66
cg02863117	CAPG;SH2D6	2.54e-66
cg18354594	C1orf229	2.56e-66
cg26282384	PCDHGB4	2.57e-66
cg09998251	AC126323.1;Metazoa_SRP	2.57e-66
cg21553145	TMEM249;SLC52A2	2.59e-66
cg07705835	IL17RC	2.69e-66
cg18247055	SPAG6	2.72e-66
cg26314534	TMEM88	2.73e-66
cg11580676	BGLAP	2.84e-66
cg27023597	MIR21	3.24e-66
cg03653573	AC116366.5	3.28e-66
cg15988320	PCDHGC5	3.3e-66
cg27405706	TFF1	3.35e-66
cg11667101	TAF5	3.36e-66
cg02828397	CCL3	3.5e-66
cg14891410	WT1;WT1-AS_3;WT1-AS_6	3.59e-66
cg23621013	FAM180A	3.63e-66
cg23296791	CLC	3.64e-66
cg22785629	RILP	3.9e-66
cg00980904	RASSF1-AS1	4.15e-66
cg14578677	TLR1;TLR6;AC108044.1	4.25e-66
cg07838272	CAV1	4.52e-66
cg02531437	PRLHR	5.18e-66
cg25659902	AL662797.1	5.44e-66
cg07675682	SGSH	6.02e-66
cg09892262	KRTAP24-1	6.04e-66
cg16566391	CRABP1	6.14e-66
cg21578195	PTK6	6.16e-66
cg04493432	AC104650.1	6.3e-66
cg24260359	DNASE1L3	6.47e-66
cg26270038	MYH6	6.88e-66
cg09664492	PROM2	6.91e-66
cg04649598	CTD-2337I7.1	7.19e-66
cg04830357	PCDHGA2	7.58e-66
cg01887803	STS	7.81e-66
cg01314252	IL17RE	8.18e-66
cg12626589	PPT2;PPT2-EGFL8	8.33e-66
cg27449258	ADARB1	8.47e-66
cg20334313	SNTG1	8.69e-66
cg15679098	RAPSN	8.78e-66
cg25230363	AQP1	9.31e-66
cg26226988	MUC6	9.45e-66
cg21472468	RP11-325P15.1	9.53e-66
cg04601090	PLEKHG5	9.79e-66
cg03607117	SFMBT1;RP11-5O17.1	9.83e-66
cg24583987	GUCA2B	1.03e-65
cg13155823	RP11-26J3.4	1.05e-65
cg03820795	SPNS3	1.08e-65
cg25590527	GGT1	1.09e-65
cg15624376	HOXA4	1.16e-65
cg16413327	PYCARD	1.16e-65
cg14194983	NPPA	1.24e-65
cg11432797	SPN;AC009133.22	1.29e-65
cg01919999	SNORD96A	1.34e-65
cg06495961	DPP6	1.36e-65
cg26108976	RP11-1046B16.3	1.57e-65
cg12610087	AC005027.3	1.61e-65
cg27085821	TBX6	1.64e-65
cg01720337	CNTN6	1.69e-65
cg08655071	TRAF3IP3	1.71e-65
cg14188840	HOXA10-HOXA9;HOXA10	1.93e-65
cg23513930	GHRL	1.96e-65
cg25490585	RP11-139H15.5	1.96e-65
cg02438781	ZNF729	2.02e-65
cg26812411	ARHGAP32	2.25e-65
cg19186356	ALDH2	2.28e-65
cg00377497	PTK2B	2.28e-65
cg26937434	ANKS4B	2.28e-65
cg13545089	AC104532.4	2.29e-65
cg19111999	VIM	2.36e-65
cg14260643	CYP3A5	2.47e-65
cg01329005	BST2;CTD-2521M24.9;MVB12A	2.5e-65
cg17425616	SNX2	2.5e-65
cg02586198	AC009133.15;AC009133.24	2.59e-65
cg01246390	PTMAP4;LINC00987	2.6e-65
cg24169915	C14orf177	2.73e-65
cg18688062	PSORS1C3	2.85e-65
cg05004506	OR51G1;OR51G1	3.04e-65
cg09110274	CACNA2D4	3.04e-65
cg04710115	TREML1	3.04e-65
cg25391023	BTNL2	3.09e-65
cg19222574	PLXNA1	3.42e-65
cg24000908	SLC12A7	3.48e-65
cg14751552	RPL7	3.55e-65
cg18546006	TRIM13	3.59e-65
cg09169531	SPRR2A	3.72e-65
cg02060465	SPRR4	4.08e-65
cg07852825	GHSR	4.32e-65
cg24866792	BPIFA4P	4.35e-65
cg04473405	KRT85	4.39e-65
cg02192490	RP11-351J23.1	4.56e-65
cg00241002	RP13-16H11.7	4.68e-65
cg11228744	ERC2-IT1	4.98e-65
cg25503804	F2	5.43e-65
cg16219603	PENK	5.74e-65
cg24023487	SPTLC3	5.85e-65
cg03043406	RP11-269F19.2;SNORD46;SNORD38A;SNORD38B;SNORD38B	5.89e-65
cg05869537	SIGLEC15	6.13e-65
cg00424169	TEX26	6.44e-65
cg11314042	AIG1	6.59e-65
cg21663219	TNFRSF13C	6.59e-65
cg01635310	KCNN1	6.59e-65
cg19059861	BPIFA1	6.68e-65
cg08498647	TREH	6.72e-65
cg14737994	ZNF177	6.84e-65
cg08903381	TBX6	7.29e-65
cg03478199	GRM1	7.68e-65
cg20740051	B4GALT3	7.8e-65
cg21129181	CTD-2245E15.3	8.06e-65
cg05665651	RP1-168P16.3	8.09e-65
cg14440205	MIR379;MIR411	8.1e-65
cg18081818	AC005082.12	8.26e-65
cg18715665	LIG1;ZNF114	8.54e-65
cg26190233	PANX2	8.63e-65
cg13986272	RP11-114H7.2	8.86e-65
cg16367976	TYMP	9.32e-65
cg13314965	TM4SF19-TCTEX1D2;TM4SF19	9.96e-65
cg26437009	AC140912.1	1.02e-64
cg02138218	TNN	1.11e-64
cg00741900	DIO3OS;MIR1247;DIO3	1.17e-64
cg26296574	CTC-435M10.6	1.25e-64
cg02974976	NAP1L4P1	1.37e-64
cg14294096	MIR670	1.48e-64
cg00658007	RD3	1.51e-64
cg08912666	RP11-380J14.1	1.53e-64
cg08719289	CITED4;RP5-1066H13.4	1.54e-64
cg02325250	CSF2	1.58e-64
cg10006762	EHBP1L1	1.66e-64
cg12424383	RP11-288L9.1	1.7e-64
cg23341182	BLOC1S2	1.71e-64
cg19204946	FCAMR	1.81e-64
cg02956542	PGLYRP4	1.82e-64
cg15035705	MAML1	1.86e-64
cg27319917	RP11-44I10.3	1.92e-64
cg26600753	CTC-338M12.6	1.97e-64
cg27086014	SIGLEC12	1.99e-64
cg01657995	SNORD52	2.16e-64
cg19403534	PRLHR	2.21e-64
cg01227558	TENM2	2.35e-64
cg25076959	WI2-87327B8.2	2.54e-64
cg07535740	AC104532.4	2.68e-64
cg23765993	EPPIN-WFDC6;EPPIN	2.78e-64
cg11069071	MIR154;MIR496	2.9e-64
cg23323669	CCHCR1	3e-64
cg23912429	VIM	3.08e-64
cg24304714	LCE1C	3.37e-64
cg03127558	MAMSTR	3.5e-64
cg00278359	AL662797.1	3.65e-64
cg04742719	TRIP6;MIR6875	3.77e-64
cg22203219	IFFO1	3.88e-64
cg12324708	RP11-114H7.2	3.99e-64
cg10803722	LINC00205	4.01e-64
cg11188031	HAVCR1	4.16e-64
cg08396193	HOXA3;RP1-170O19.22;RP1-170O19.23	4.77e-64
cg20275928	LINC00482	4.92e-64
cg26558485	CYP4X1	5.23e-64
cg01062020	SH2D1B	5.69e-64
cg16907766	CCDC3	5.75e-64
cg25753817	INPP1	5.77e-64
cg02768694	M1AP	5.78e-64
cg08548498	SLPI	6.1e-64
cg00875511	TACR3	6.14e-64
cg11358405	CTD-3094K11.1	6.33e-64
cg10752676	IQUB	6.4e-64
cg00477302	MIR182	6.4e-64
cg08079170	RP11-702B10.2	6.79e-64
cg12547166	ZNF876P	7.2e-64
cg09084256	C22orf42	7.31e-64
cg04784410	SNORD113-4;SNHG23;SNORD113-5	7.43e-64
cg16026035	RP11-136K7.2	8.07e-64
cg13060970	AC015969.3;PLEK	8.14e-64
cg05667379	DPP10-AS1	8.97e-64
cg15965241	P2RX7	9.34e-64
cg03267151	SMG1P5;RP11-347C12.12	1.04e-63
cg09107315	RP11-386I14.2	1.1e-63
cg12883279	PPT2;PPT2-EGFL8	1.13e-63
cg07318128	HOXB3;HOXB6	1.25e-63
cg02736228	PLEKHA6;RP11-739N20.2	1.32e-63
cg07706375	CTD-3252C9.4;MIR24-2;MIR27A;MIR23A	1.37e-63
cg24590395	CYP4B1	1.38e-63
cg00498289	FNDC4;GCKR	1.39e-63
cg13005636	ST6GALNAC4P1	1.39e-63
cg25583580	MFSD11	1.43e-63
cg07243202	NDRG1	1.51e-63
cg18556834	REC8	1.53e-63
cg26378073	CALHM2	1.62e-63
cg00025591	S100B	1.67e-63
cg12624087	C22orf24	1.7e-63
cg17408527	ZSCAN18	1.83e-63
cg06483559	OR6X1	1.9e-63
cg06433467	CTC-537E7.3	1.98e-63
cg02410245	RP5-940J5.9	2.04e-63
cg04715245	IL6R	2.09e-63
cg01544580	CBX1;SNX11	2.27e-63
cg02124892	LIPH	2.33e-63
cg09030212	NTNG1	2.4e-63
cg02867250	PSORS1C2;POLR2LP	2.49e-63
cg11525052	TSPAN32	2.53e-63
cg26066277	FAM195B;PPP1R27	2.55e-63
cg07012128	DLGAP2	2.65e-63
cg26857370	RP11-244B22.5;RP11-488I20.8;AC023824.1	2.7e-63
cg00979288	CTC-270D5.1	2.74e-63
cg20945085	M1AP	2.76e-63
cg20103311	KLK8	2.8e-63
cg07648740	HTR5A-AS1	2.91e-63
cg00476430	RP11-172E10.1	2.97e-63
cg00280812	KRT80	3.05e-63
cg25473438	TREML2	3.07e-63
cg23093846	RP4-609E1.2	3.18e-63
cg24242823	NPY	3.19e-63
cg10333520	TRANK1	3.22e-63
cg18900669	CD68	3.27e-63
cg15238382	DIO3OS;MIR1247;DIO3	3.5e-63
cg02278841	C15orf53	3.51e-63
cg00346320	RP11-863P13.4	3.79e-63
cg15069235	RP3-399L15.3	3.81e-63
cg11127249	IL2RA	3.88e-63
cg03190661	TMC8	3.88e-63
cg23311800	ELF5	3.91e-63
cg00275828	KRTAP2-4	4.07e-63
cg04144222	ANXA9	4.18e-63
cg22335340	U47924.31;PTPN6	4.24e-63
cg08153752	PANK4	4.45e-63
cg18534176	KMT2C;FABP5P3	4.47e-63
cg06761584	FLNC	4.47e-63
cg15298173	RP11-300A12.2;TUBBP8	4.52e-63
cg06882544	ZNF732	4.59e-63
cg15694715	RP11-770J1.3	4.76e-63
cg02886578	LELP1	4.73e-63
cg18397975	RP11-1084J3.3	4.73e-63
cg22231483	LRRN4CL	4.76e-63
cg14789818	RNA5SP77	4.92e-63
cg10093934	Y_RNA	5.21e-63
cg23168531	UNCX	5.81e-63
cg15522677	TYMSOS;RP11-806L2.5	5.95e-63
cg07006551	FBXO2	6.78e-63
cg21700511	HSPA12B	6.89e-63
cg00941241	CLSTN1	7.2e-63
cg02231066	SMIM4	7.45e-63
cg01964852	HOXA-AS2	7.46e-63
cg01413582	AL662797.1	7.74e-63
cg21870884	GPR25	8.13e-63
cg10108468	AC103563.9	8.13e-63
cg13445177	S100A10;AL591893.1	8.13e-63
cg25541738	RP11-440D17.3	8.21e-63
cg06226150	RP4-583P15.14;SLC2A4RG	8.39e-63
cg23752985	AC016753.2	8.64e-63
cg09701880	MIR4435-1HG;AC017002.2	8.86e-63
cg19712659	SNORD99;SNORA61	8.98e-63
cg16039071	C6orf223	9.49e-63
cg10949007	GLRX	9.54e-63
cg08070771	ZIC4	9.76e-63
cg10392572	RP11-466L17.1	9.97e-63
cg07585257	RP11-118F19.1	1.01e-62
cg16290996	ZBTB37	1.02e-62
cg13766044	P3H4;FKBP10	1.02e-62
cg18424208	CDX1	1.03e-62
cg01264106	LGALS1	1.03e-62
cg11574055	NAP1L4P1	1.07e-62
cg13210467	GPC2;STAG3	1.1e-62
cg00760992	NCKAP5L	1.27e-62
cg25481253	TAS2R38	1.3e-62
cg05360774	AC023469.2	1.31e-62
cg04185041	CTD-2012K14.8	1.4e-62
cg20801476	RP1-170O19.17;EVX1	1.47e-62
cg04252044	TPRG1	1.53e-62
cg19536664	RP11-589P10.5;ALOX12	1.58e-62
cg21626848	P3H4;FKBP10	1.64e-62
cg17941572	LINC00466	1.64e-62
cg20894936	KRTAP5-3	1.81e-62
cg06527318	MIR4425	1.86e-62
cg16791210	RETSAT;ELMOD3	2.14e-62
cg06942701	AC009487.4;AC009487.5;SLC4A10	2.21e-62
cg14542503	TBX22	2.25e-62
cg01904296	MIR7154	2.35e-62
cg19426522	EOMES	2.35e-62
cg11613559	PHACTR2P1	2.43e-62
cg01782097	RP11-54O7.1	2.49e-62
cg04671611	RP11-468I15.1	2.54e-62
cg01612158	FCRL4	2.61e-62
cg21022868	SLAMF9	2.61e-62
cg08677655	SCARF1	2.72e-62
cg25062539	IL7	2.74e-62
cg14622443	MARCH10;RP11-453A12.1	2.75e-62
cg03938558	CACNA1E	2.81e-62
cg01202976	ITPK1-AS1	2.82e-62
cg05968822	TMEM63A	2.82e-62
cg02131862	KRTAP24-1	2.83e-62
cg10300188	KCNQ1DN	3e-62
cg09906145	CTD-2012K14.8	3.03e-62
cg04536765	BAG6	3.08e-62
cg02819992	AC004012.1	3.09e-62
cg05429895	TLR4	3.1e-62
cg05959508	TRAF3IP3	3.18e-62
cg24320673	CD300A	3.2e-62
cg04065086	RP11-68I18.10	3.21e-62
cg06498267	HCN1	3.23e-62
cg15597855	VTCN1	3.23e-62
cg21808406	CD68	3.36e-62
cg20887442	RP11-849H4.4	3.64e-62
cg19187564	CEACAM4	3.8e-62
cg20623350	ENTHD1	3.88e-62
cg02624246	MIR200C;MIR141;U47924.29	3.93e-62
cg22889914	ANKRD2	4.13e-62
cg14694370	ATP2B3	4.14e-62
cg10805440	KRTAP27-1	4.16e-62
cg24520479	RP11-580J4.1	4.19e-62
cg14237025	CCL16;CTB-186H2.3	4.57e-62
cg23873415	RP11-353M9.1	4.71e-62
cg00971695	PLEKHG3	4.85e-62
cg12543918	EGFLAM-AS2	5.1e-62
cg17321561	FAM107B	5.16e-62
cg22791045	OPCML	5.42e-62
cg15599832	OSMR	5.71e-62
cg14231297	ZSCAN18	5.73e-62
cg01408486	CXXC5	5.75e-62
cg21490635	EMP1	6.23e-62
cg08315133	TMCO6	6.4e-62
cg13870494	MAMDC2	6.46e-62
cg13637731	AP001062.7	6.57e-62
cg26056703	LINC01197	7.63e-62
cg26101277	CCL1	7.81e-62
cg26111757	BPIFB3	7.9e-62
cg03130530	AC021021.2	7.95e-62
cg05247391	LACTB2;XKR9	8.21e-62
cg11117637	CDX1	8.33e-62
cg04781494	CASP10	8.4e-62
cg24389054	HOXA3;RP1-170O19.22;RP1-170O19.23	9.5e-62
cg04920416	RP11-333J10.2	9.64e-62
cg05858126	MIR146B	9.94e-62
cg12081303	ARHGAP30	9.95e-62
cg25249068	BFSP2	1e-61
cg07628580	RP3-434P1.6	1.02e-61
cg13016308	MRGPRE	1.07e-61
cg01182683	KRT80	1.11e-61
cg20640432	CREB3L3	1.12e-61
cg01937809	LINC01137	1.13e-61
cg11855615	E2F3P1	1.15e-61
cg25851152	MIR146B	1.16e-61
cg20319926	FAM195A	1.17e-61
cg23666491	RP11-191A15.4	1.18e-61
cg24755459	RP11-168L7.3	1.19e-61
cg10653465	RP11-815J21.2	1.19e-61
cg17105755	M1AP	1.24e-61
cg00594278	GRAP2	1.32e-61
cg00017489	DPP6	1.35e-61
cg15061330	SNORA17	1.35e-61
cg07254032	HCN1	1.37e-61
cg20972214	SLC2A3	1.39e-61
cg07922606	HIST1H3E	1.44e-61
cg13951490	PCDHGA11	1.48e-61
cg12799824	AL590822.1	1.48e-61
cg07565505	IRX4;CTD-2194D22.4	1.49e-61
cg23010035	OR2Y1	1.54e-61
cg23399286	OC90	1.61e-61
cg00917362	MIR1184-1	1.64e-61
cg03577250	C20orf203	1.69e-61
cg07798731	C10orf99	1.7e-61
cg03882382	CTB-50L17.14;LRG1	1.74e-61
cg10369242	KRT7	1.83e-61
cg07219769	LGALS1	1.86e-61
cg23004174	CD109	1.97e-61
cg23250540	TMPRSS3	2.01e-61
cg14963406	RHPN1	2.24e-61
cg16473141	REC8	2.24e-61
cg01911239	PCDHGA5	2.25e-61
cg11267810	RIN2	2.28e-61
cg10528989	BDKRB1	2.32e-61
cg27665659	AP1S1	2.34e-61
cg02646491	KCNQ1DN;KCNQ1DN	2.36e-61
cg19635505	KLHL33	2.44e-61
cg13823666	FYTTD1P1	2.58e-61
cg22288613	AGGF1P1	2.84e-61
cg20225745	KRT80	3.05e-61
cg24701725	IGHA2	3.14e-61
cg27157482	HOXA9	3.18e-61
cg17243643	RDH5	3.21e-61
cg07682037	FERMT3	3.21e-61
cg26174326	HIST1H1PS2	3.51e-61
cg15381251	C22orf42	3.53e-61
cg25291653	RIN2	3.6e-61
cg05473648	MIR708	3.76e-61
cg12148129	LINC01116;LINC01117	3.81e-61
cg05862438	RP11-556I13.2	4.08e-61
cg03081173	XXbac-BPG299F13.17	4.14e-61
cg07271264	MYOD1	4.17e-61
cg06711306	CTC-231O11.1	4.3e-61
cg05693489	PSMB8	4.31e-61
cg26742275	RP11-20G13.1	4.38e-61
cg22663489	CCDC88B	4.52e-61
cg17279458	SOCS5P3;ZNF502	4.55e-61
cg20777266	CTB-33O18.2	4.78e-61
cg18705909	PCDHGA6	4.95e-61
cg11215296	RP11-38J22.3	5.14e-61
cg08638184	AC003986.5	5.65e-61
cg08887400	AL662797.1	5.98e-61
cg05470166	HRCT1	6.2e-61
cg20408175	C12orf10	6.24e-61
cg07850527	SLC22A31	6.41e-61
cg13278004	SP140L	6.51e-61
cg18160135	AC019131.1	6.71e-61
cg03033182	SCOC	6.75e-61
cg05168609	KRTAP10-4	6.77e-61
cg15641789	ZNF100	7.05e-61
cg12346967	KRTAP8-1	7.13e-61
cg12659981	TENM2	7.17e-61
cg02152819	B3GNT7	7.49e-61
cg11679069	DNAJC15	7.64e-61
cg01072821	PRSS55	7.67e-61
cg17419888	AC011239.2	8e-61
cg03012854	RFPL1	8.02e-61
cg05446471	HDAC11-AS1	8.28e-61
cg19989295	REC8	8.51e-61
cg11076954	RN7SL105P	8.62e-61
cg07964113	CTD-2561B21.3	8.74e-61
cg16179952	AC116614.1	8.87e-61
cg00298977	LELP1	9.24e-61
cg04468198	C16orf74	9.57e-61
cg20266715	CAPN2	1e-60
cg20704654	LINC00028	1.01e-60
cg20918393	RIN2	1.03e-60
cg04127342	RP11-17A4.2	1.06e-60
cg09045681	CCHCR1	1.09e-60
cg08548718	CEACAM8;PSG3	1.2e-60
cg05803237	MTNR1B	1.2e-60
cg01567771	TRAV3	1.28e-60
cg21261158	RASA3-IT1	1.29e-60
cg09926260	MIR515-1;MIR519E	1.3e-60
cg20336809	ATP4B	1.31e-60
cg24936695	CLDN17	1.33e-60
cg10648763	TGFBI	1.34e-60
cg16290689	TEX26	1.5e-60
cg02764897	KRTAP13-1	1.54e-60
cg22396979	RP11-706C16.5;GML	1.58e-60
cg18427856	AL662797.1	1.67e-60
cg21106505	LMNTD2	1.69e-60
cg01197156	PCOLCE	1.91e-60
cg12831034	CTSZ	1.94e-60
cg22871947	C10orf71-AS1;C10orf71	1.98e-60
cg09302355	FERMT3	2.12e-60
cg11848173	RP11-644F5.11	2.13e-60
cg23814172	MIR5699	2.22e-60
cg03348792	KRT1	2.22e-60
cg10279487	RP11-806H10.4	2.31e-60
cg22771332	AC073869.20	2.39e-60
cg13772815	MEIS3P2	2.5e-60
cg05308792	TMEM204;LA16c-380F5.1	2.51e-60
cg00447208	TMC8	2.57e-60
cg01414882	HOXA3;RP1-170O19.22;RP1-170O19.23	2.68e-60
cg17487029	LINC01519	2.73e-60
cg25423416	CELSR1	2.75e-60
cg01783525	CTD-2522B17.5	2.77e-60
cg04562611	PIGQ;NHLRC4	2.78e-60
cg13924974	PSMG2	2.82e-60
cg26527913	TRGV7	2.93e-60
cg12967723	TRIP6;MIR6875	3e-60
cg21966975	PADI3	3.16e-60
cg05277881	SCGB2A1	3.22e-60
cg10397440	PENK	3.29e-60
cg25754143	TRPM5	3.33e-60
cg13327545	RP11-573G6.8	3.43e-60
cg00817377	ELN	3.59e-60
cg05067125	S100Z	3.62e-60
cg10973762	RP11-154J22.1	3.62e-60
cg03669143	RP11-200A1.1	3.74e-60
cg11859922	GREM2	3.99e-60
cg25468058	ANXA9	4.06e-60
cg20120165	RP11-94C24.6	4.17e-60
cg11420883	PAPOLB	4.23e-60
cg24059033	TPTE	4.23e-60
cg11336311	ID3	4.29e-60
cg24818566	BRINP1	4.47e-60
cg02529547	HILS1	4.63e-60
cg20372821	HCRT	4.75e-60
cg04138756	SPRR3	4.77e-60
cg27024515	TNNC1;NISCH	5.25e-60
cg19922137	SYT14	5.27e-60
cg18054578	BBC3	5.4e-60
cg05798627	CABP2	5.42e-60
cg13166875	SEC14L3	5.65e-60
cg06074896	MICALL2	5.75e-60
cg04275881	SLAMF8	5.89e-60
cg00731062	C3orf79	5.93e-60
cg18443486	RP11-148K1.12	6.14e-60
cg11162104	RNA5SP75	6.42e-60
cg22491058	C4BPA	6.94e-60
cg22061523	TK1;AFMID	7.29e-60
cg01189915	RP11-212P7.3;HILPDA;RP11-155G14.6	7.33e-60
cg07805981	METTL7B	7.35e-60
cg12543949	FAM198B	7.38e-60
cg10804656	RP11-573G6.8	7.38e-60
cg00059225	GLRA1	8.07e-60
cg06974135	NDUFB4P2	8.48e-60
cg09662920	RP11-386I14.2	8.49e-60
cg24123311	LIG1;ZNF114	8.92e-60
cg04744713	MROH5	8.92e-60
cg08873746	KLHL30-AS1;FAM132B	9.08e-60
cg23878404	KRTAP1-5	9.09e-60
cg09638704	OR2W5	9.65e-60
cg03309770	TVP23A	9.65e-60
cg22815214	CACNA1S	9.66e-60
cg24700993	MIR30C1	9.71e-60
cg05312104	NAV2-IT1	9.79e-60
cg21304158	SNED1	1.01e-59
cg17512474	CDX1	1.01e-59
cg00022633	CDK8	1.19e-59
cg00472801	KHDRBS2	1.2e-59
cg26577752	RP11-564A8.4	1.21e-59
cg10982443	KLHL33	1.23e-59
cg24467337	C20orf203	1.28e-59
cg12675571	RP11-394O4.6;MIR143;RP11-394O4.5;MIR145	1.31e-59
cg03308399	HOXA-AS2	1.31e-59
cg04924511	GHRL	1.31e-59
cg18157275	OR5M10	1.41e-59
cg05275605	COL18A1-AS1	1.49e-59
cg11377088	BORA	1.56e-59
cg01535567	AL022341.3;WDR90	1.58e-59
cg25170822	AQP2	1.59e-59
cg27574223	RP11-283G6.3	1.64e-59
cg07014174	KRTAP11-1	1.7e-59
cg25560398	ECEL1P2	1.85e-59
cg09938408	EHD4-AS1	1.89e-59
cg11056129	LINC01548	1.94e-59
cg10642330	NNAT	1.97e-59
cg14010550	LLNLR-284B4.1	1.99e-59
cg23418510	RP11-165A20.3	2.15e-59
cg25494605	HMP19	2.22e-59
cg08785215	FLNB	2.23e-59
cg13692105	SOHLH1;KCNT1	2.31e-59
cg13048591	HSPB7	2.32e-59
cg03506489	KCNA4	2.37e-59
cg11729430	CRYGA	2.38e-59
cg14992144	GHRL	2.52e-59
cg08352148	KRT71	2.54e-59
cg03431846	REC8	2.64e-59
cg02236650	VIM	2.65e-59
cg08543028	RP11-467L13.4	2.65e-59
cg03785076	SNED1	2.67e-59
cg09285543	MEG3_2	2.67e-59
cg15776494	KLK1	2.71e-59
cg21870145	RANBP3L	2.82e-59
cg10659886	ZSCAN18	2.97e-59
cg08155741	TRPT1	2.99e-59
cg01400884	ZBED9	3.08e-59
cg00937742	LYPD1	3.13e-59
cg21340845	LRP1B	3.13e-59
cg08049592	AQP12B	3.2e-59
cg11763800	C14orf80	3.71e-59
[truncated: 120,245 more rows]

## Sheet: KIRP
probe	gene	adj.P.Val
cg17522445	LIG1;ZNF114	1.06e-143
cg14601621	MIR3074	1.88e-136
cg17888086	MIR6732	3.95e-120
cg26066277	FAM195B;PPP1R27	5.2e-120
cg24185397	RP11-173M1.4	6.7e-116
cg08016257	TMEM140	7.26e-116
cg26627956	IMPDH1P10;RNU7-45P	9.49e-114
cg07690326	MIR661	3.07e-107
cg02782634	MIR21	2.08e-105
cg18748525	KCTD20	5.27e-103
cg03537810	MIR661	2.76e-98
cg18715665	LIG1;ZNF114	4e-98
cg25934700	RP3-402G11.27	4.59e-97
cg15364131	C22orf24	1.77e-96
cg24203709	SPTBN5	2.18e-96
cg00510447	CLDN6	1.26e-94
cg09938408	EHD4-AS1	1.9e-94
cg13564055	RP1-59D14.1	3.82e-93
cg06755297	AURKAPS1	1.57e-92
cg03890877	RP5-1157M23.2	2e-92
cg22720029	PISD	5.64e-91
cg25252598	GAPDH	7.37e-91
cg19136632	ARL6IP5	1.09e-90
cg18188010	SPTBN5	2.32e-90
cg03634777	RP11-288H12.3	1.42e-86
cg06663644	SPTBN4	1.56e-86
cg16881676	RP11-977B10.2	2.18e-85
cg27641628	TMEM140	3.16e-85
cg02515217	MIR21	4e-85
cg00792123	HS1BP3	5.85e-85
cg19853703	APOL6	5.88e-85
cg08259810	RP11-351I24.1;ADM	7.24e-85
cg02481642	WISP2	2.2e-84
cg13473894	RP11-353M9.1	3.32e-84
cg27428856	TRAF3IP2	3.49e-83
cg09645138	LINC01338	4.63e-83
cg15103195	AP1S1	6.88e-83
cg12530994	U8	9.75e-83
cg03124636	FLOT1	9.76e-83
cg08595806	RP11-288H12.3	1.13e-82
cg21469505	LIPG	2.59e-82
cg13341668	HYAL2	2.67e-82
cg18265162	SERTAD4-AS1	3.17e-82
cg26914705	C22orf24	4.95e-82
cg10703481	DNHD1	5.21e-82
cg07181702	MIR21	5.28e-82
cg01853079	KDELC2	1.26e-81
cg21258596	AP000704.5	1.42e-81
cg19154027	RP11-732A21.3	3.6e-81
cg26158959	SYT14	7.21e-81
cg13337949	FLOT1	7.29e-81
cg04505809	ELMO3	9.47e-81
cg15759721	MIR21	1.54e-80
cg10201084	RP3-402G11.27	3.79e-80
cg25876656	SERTAD4-AS1	5.15e-80
cg19131313	CLN8	5.78e-80
cg12426196	RP11-544M22.13;TSTD1	1.68e-78
cg24493004	CYP46A4P	3.44e-78
cg20749584	RP11-867G23.12	5.61e-78
cg10047572	FLOT1	7.95e-78
cg27616751	CLDN15	1.41e-77
cg14692854	RP11-363D14.1	3e-77
cg11956819	MIR661	4.38e-77
cg00093087	AQP2	7.17e-77
cg24161057	RP11-544M22.13;TSTD1	1.34e-76
cg06349174	AC090587.5;MIR4687	1.92e-76
cg10460946	RP11-219G17.8	1.92e-76
cg02596427	AC073283.7	4.74e-76
cg21501358	KLHL14	1.44e-75
cg16342115	KLHL14	1.51e-75
cg27180868	RP11-544M22.13;TSTD1	3.42e-75
cg13906823	RP11-544M22.13;TSTD1	3.8e-75
cg01651570	Y_RNA	5.3e-75
cg02837128	RBPMS	8.57e-75
cg04999352	RARRES3	1.05e-74
cg27082076	RP11-521B24.5;CRIP2	1.05e-74
cg12232308	FLOT1	1.89e-74
cg07366553	RP3-402G11.27	8.58e-74
cg20749059	SPATA12	9.96e-74
cg00782099	TMEM174	1.61e-73
cg06339396	RP11-405F3.4	1.75e-73
cg13651876	CHCHD4P3	3.06e-73
cg04282788	SERTAD4-AS1	3.25e-72
cg07675682	SGSH	3.26e-72
cg21874862	RP3-402G11.27	8.67e-72
cg24123311	LIG1;ZNF114	9.27e-72
cg01881046	SNX25	1.29e-71
cg11731300	RP11-544M22.13;TSTD1	2.43e-71
cg22785629	RILP	9.15e-71
cg19789466	OAS1	1.24e-70
cg09028651	SLC25A34	1.27e-70
cg25561754	SGSH	1.4e-70
cg20270863	SERTAD4-AS1	1.63e-70
cg16033151	RP11-68I3.5	1.82e-70
cg02467899	RP11-455O6.5	2.06e-70
cg13597544	RP11-1055B8.4	2.96e-70
cg24260847	RP11-863K10.7	3.55e-70
cg05972352	RP11-120K24.4;RP11-120K24.5	4.57e-70
cg02875879	MIR367;MIR302D;MIR302A;MIR302C;MIR302B	5.56e-70
cg27665659	AP1S1	7.18e-70
cg23696248	MIR8085	7.49e-70
cg00319761	PKMYT1	7.8e-70
cg03349407	AURKAPS1	1.25e-69
cg21275690	THOC6	1.87e-69
cg12690127	U47924.31;PTPN6	2.56e-69
cg17297328	SLC25A24	3.47e-69
cg05104283	RP11-75C10.7	6.89e-69
cg20261167	SPP1	8.79e-69
cg02181247	RP11-351I24.1;ADM	1.24e-68
cg24517066	RSAD1	7.05e-68
cg26654851	LAMA3	1.03e-67
cg12624087	C22orf24	1.35e-67
cg26432961	FOXP4-AS1	1.83e-67
cg13377102	KCNAB3	2.51e-67
cg13476901	KLHL14	3.32e-67
cg13407335	KCNAB3	3.38e-67
cg16513459	KCNAB3	3.38e-67
cg26204477	CTB-58E17.3	1.42e-66
cg08460635	MIR26B	1.68e-66
cg14405996	RP11-414H17.5	2.14e-66
cg11402586	ITGA2	2.47e-66
cg02746110	MIR1301	2.48e-66
cg13466383	RP11-544M22.13;TSTD1	5.77e-66
cg06854487	AP002490.1;LRTOMT	7.06e-66
cg19004465	RP11-353N14.7	8.22e-66
cg13485320	SLC22A18	9.33e-66
cg16468729	CXCL8	1.76e-65
cg21830368	RP11-936I5.1	2.44e-65
cg16755922	RP13-638C3.6;RP13-638C3.2	2.56e-65
cg11169848	AP003419.11;CLCF1;CTC-1337H24.4	3.06e-65
cg05329135	METTL21EP	3.52e-65
cg12403889	MAD2L2	4.35e-65
cg15044453	RNU6-302P	4.56e-65
cg13575252	TMEM240	6.75e-65
cg23542902	RP11-135A1.3	7.7e-65
cg05082527	MIR130A	8.43e-65
cg20392842	HLA-DMB	1.62e-64
cg23365801	KCNAB3	2.26e-64
cg13972491	MIR3074	2.27e-64
cg19501190	RP11-800A3.7	2.33e-64
cg08849095	MIR23B;MIR27B	4.78e-64
cg21522254	MED21	6.47e-64
cg03468671	RP11-407N17.5	7.97e-64
cg21402832	TNFSF10	9.43e-64
cg08962271	PITPNM1	1.06e-63
cg02633729	DNM3OS;MIR199A2	1.23e-63
cg01323777	KCNAB3	2.99e-63
cg23193759	C10orf35	3.15e-63
cg21216220	C17orf78	3.76e-63
cg11332928	TCTEX1D4;BTBD19	3.84e-63
cg21450888	DNM3OS;MIR199A2	3.9e-63
cg13699808	ZMYND8	1.13e-62
cg07858113	FLOT1	1.22e-62
cg03935116	FLJ13224	1.27e-62
cg17295878	RP11-353N14.7	1.5e-62
cg15460348	SPP1	1.86e-62
cg16810293	TM4SF1;TM4SF1-AS1	2.92e-62
cg08284371	RP11-431M7.3	5.02e-62
cg20097219	RP11-353N14.7	7.23e-62
cg13745870	SPATA12	1.24e-61
cg02682520	CTC-231O11.1	1.37e-61
cg04276626	MIR21	1.57e-61
cg07292251	PFN3;GRK6	1.71e-61
cg16541026	RP13-131K19.2;P4HTM	1.84e-61
cg17178220	DNM3OS;MIR199A2	1.9e-61
cg16126079	DNHD1	2.55e-61
cg03354554	RP11-540A21.2	2.61e-61
cg26314534	TMEM88	2.69e-61
cg09204108	EHD4-AS1	2.92e-61
cg04808027	RP11-867G23.12	3.22e-61
cg19687152	RNU6-244P	3.41e-61
cg16322014	DNHD1	3.65e-61
cg17978367	CTC-507E2.2	5.94e-61
cg14918082	KCNAB3	6.18e-61
cg01849466	Y_RNA	9.27e-61
cg09851343	LMF1-AS1	1.73e-60
cg03177025	BRE	2.53e-60
cg22871253	EZR-AS1	2.73e-60
cg00280758	NAA15	2.75e-60
cg00629117	SPSB3;IGFALS	2.78e-60
cg08171483	MIR26A1	3.16e-60
cg10930502	SGSH	4.83e-60
cg21106505	LMNTD2	4.95e-60
cg18621101	ANK3;RP11-131N11.4	1.29e-59
cg15151059	RP11-316M1.12	1.5e-59
cg12315892	RP11-173M1.5	1.91e-59
cg01651284	CHRNA9	2.09e-59
cg21546155	CTC-231O11.1	2.58e-59
cg21341586	AC019131.1	2.68e-59
cg05708550	KDM3B	3.58e-59
cg13151135	CEP85	5.5e-59
cg11304234	IL18	9.87e-59
cg02971381	GAPDH	1.27e-58
cg12814480	RP4-647C14.3	1.4e-58
cg12343363	METTL21C	1.68e-58
cg07964113	CTD-2561B21.3	2.1e-58
cg08687386	FLOT1;XXbac-BPG252P9.10	2.12e-58
cg07604732	CLEC19A;AC003003.5	2.56e-58
cg03025825	RP11-667K14.14	4.96e-58
cg14263139	RIN1	5.84e-58
cg07585257	RP11-118F19.1	8.16e-58
cg13207702	CA6	1.04e-57
cg24411043	RP11-544M22.13;TSTD1	1.08e-57
cg22508782	RP13-131K19.2	1.13e-57
cg08664849	RP11-20I23.1	1.44e-57
cg12394201	ALKBH3-AS1;RP11-613D13.4	3.61e-57
cg14045814	MIR26B	3.71e-57
cg07967677	RP11-544M22.13;TSTD1	3.9e-57
cg16919420	RP3-402G11.27	3.97e-57
cg23412777	PYGO1	4.26e-57
cg24700993	MIR30C1	4.66e-57
cg04592706	ABCA4	5.62e-57
cg16959758	TGM2	9e-57
cg25214966	DNM3OS;MIR199A2	1.01e-56
cg09996597	SPSB3;IGFALS	1.11e-56
cg04656171	EHD4-AS1	1.12e-56
cg21338225	AC007036.4	1.15e-56
cg22061523	TK1;AFMID	1.17e-56
cg25095814	CASP8	1.22e-56
cg09072216	SPG20-AS1	1.56e-56
cg21547371	RP5-966M1.6;MUSTN1	1.66e-56
cg18269801	C17orf78	2.67e-56
cg00370106	SYTL3	3.32e-56
cg04802221	EXOC3L1	3.56e-56
cg03774540	LAMA3	3.6e-56
cg20867633	GOLT1A	5.57e-56
cg07812887	MIR1271	8.49e-56
cg14363954	RP11-413M3.4	1.14e-55
cg01741932	RP11-415J8.5	1.19e-55
cg00827973	RNA5SP74	1.25e-55
cg12858593	PIWIL2	1.25e-55
cg10204652	RP11-298I3.6	1.37e-55
cg02137183	AGK	1.55e-55
cg05949640	FAM193A	1.74e-55
cg06709214	AC006942.4	2.38e-55
cg17419888	AC011239.2	2.4e-55
cg09192801	ZDHHC17	3.46e-55
cg25986727	RP11-849H4.4	3.7e-55
cg15350627	RP5-940J5.3;GAPDH	4.98e-55
cg13612447	RP11-74E22.4;MIR1253	9.85e-55
cg06972019	ENO1-AS1	1.13e-54
cg17961200	CEL	1.19e-54
cg22908616	DNHD1	1.27e-54
cg17560267	RP1-166H4.2	1.63e-54
cg14741228	FLJ13224	1.9e-54
cg14096180	AP003419.11;CLCF1;CTC-1337H24.4	1.97e-54
cg23974819	PTPN6	2.03e-54
cg12433691	GCC2	2.16e-54
cg14153654	RP5-892F13.2	2.22e-54
cg05118960	HYAL2	2.25e-54
cg08900371	SERTAD4-AS1	4.01e-54
cg04309212	RP11-384O8.1	4.62e-54
cg15077193	MIR4745	5.38e-54
cg23646375	G0S2	6.01e-54
cg11650858	RP5-1182A14.5	6.27e-54
cg10336935	RP4-800J21.3	8.69e-54
cg13597417	LGALS9C	1.2e-53
cg09145391	TMEM102	1.26e-53
cg25850044	RP11-16E12.1	1.48e-53
cg11591485	RNU6-230P	1.68e-53
cg00520933	ZEB1	1.9e-53
cg17044356	TMEM88	2.24e-53
cg14665413	TLR1;TLR6;AC108044.1	2.45e-53
cg16143804	MSH5;MSH5-SAPCD1	2.51e-53
cg05130485	CASP8	2.61e-53
cg19937878	RP1-257A7.4	3.43e-53
cg21541083	STXBP2	3.76e-53
cg05582340	RP11-545P7.4	4.23e-53
cg26200585	PRX	5.24e-53
cg01342926	MFSD8	6.28e-53
cg19772907	ZMYND8	6.78e-53
cg14160968	RP11-359D14.3	7.24e-53
cg07618085	RP11-353N14.7	1.02e-52
cg25343618	RP11-284F21.7	1.02e-52
cg11476317	C1QTNF9B	1.04e-52
cg26174326	HIST1H1PS2	1.5e-52
cg02706881	COL18A1-AS1	1.53e-52
cg25743481	KIAA1143;KIF15	1.71e-52
cg06671340	DENND1B	2.38e-52
cg00702638	KIAA1143;KIF15	3.16e-52
cg19126169	RP11-849H4.4	3.32e-52
cg02589501	USP46-AS1	3.37e-52
cg10350880	SLC12A9	4.32e-52
cg16806210	TTC36	4.4e-52
cg25750259	TTPAL	4.48e-52
cg26853536	MIR5188	5e-52
cg25602159	ITPKC	8.06e-52
cg23131909	MIR26B	8.49e-52
cg19782652	MIR99B;MIRLET7E;MIR125A;SPACA6P	1.14e-51
cg01467789	RP11-863K10.7	1.17e-51
cg07195577	NEK8;AC010761.14	1.48e-51
cg21500354	DNHD1	1.97e-51
cg19223411	MIR26B	2.51e-51
cg05247391	LACTB2;XKR9	2.54e-51
cg08563839	TNFRSF12A	2.78e-51
cg09177080	UNC13D	3.13e-51
cg03038057	PPP1R18	3.16e-51
cg18110444	DARS	4.34e-51
cg08217733	U2AF2	4.91e-51
cg08141142	RP11-521B24.5	5.88e-51
cg00343092	TSPO	8.07e-51
cg03220363	SLA	1.07e-50
cg18953509	CLIC1;MSH5;MSH5-SAPCD1	1.13e-50
cg11614451	RP11-432B6.3	1.16e-50
cg25742365	RP11-689P11.3	1.23e-50
cg01883427	Y_RNA	1.25e-50
cg19447686	RP11-983P16.4	1.39e-50
cg15470344	MYOG	1.57e-50
cg24002149	DNM3OS;MIR199A2	1.77e-50
cg10569694	RNF216P1	2.33e-50
cg01156990	C17orf78	2.47e-50
cg20674638	ITGA2	3.33e-50
cg10543374	ULK2;RP11-78O7.3	3.52e-50
cg08761324	TIAL1	3.6e-50
cg22579950	DLEU2_6;DLEU1;DLEU1_1	5.75e-50
cg13442606	RNU1-91P	5.97e-50
cg07941983	RP11-431M7.3	6.38e-50
cg15101245	RP11-284F21.7	9.49e-50
cg12202370	PHLDA1	1.05e-49
cg00356723	NAA40	1.12e-49
cg10628982	RP11-415J8.5	1.18e-49
cg15951188	KCNAB3	1.18e-49
cg09406760	MIR661	1.29e-49
cg08331427	ECSCR;ECSCR	1.3e-49
cg06407111	RP11-552F3.9	1.54e-49
cg17980610	GYLTL1B	1.71e-49
cg18160135	AC019131.1	2.09e-49
cg27125504	ITIH4	2.12e-49
cg17971578	STK40	2.22e-49
cg26534425	IL18	2.22e-49
cg23234674	SNORA74B	2.38e-49
cg19868593	VWA7	2.52e-49
cg23708206	FAM195B;PPP1R27	2.65e-49
cg12003043	C22orf24	2.69e-49
cg22913843	SIPA1	3.23e-49
cg17282145	C1orf198	3.32e-49
cg13609040	B4GALT4	4.01e-49
cg24387542	LGALS9B	4.15e-49
cg12912663	RP11-867G23.12	4.18e-49
cg09926669	AL136419.6;MDP1	4.31e-49
cg14036776	RP11-863K10.7	4.75e-49
cg09137301	ZBED6CL	5.73e-49
cg08338216	PHACTR2P1	5.87e-49
cg15360181	SLC9A9	8.23e-49
cg07805981	METTL7B	8.36e-49
cg23873415	RP11-353M9.1	8.58e-49
cg19475067	HMGA1P3	1.07e-48
cg06080729	TNFRSF12A	1.15e-48
cg11687085	HSBP1L1	1.18e-48
cg16580289	GABRR2	1.32e-48
cg20480642	PXDNL	1.5e-48
cg17261676	HIST1H1PS2	1.77e-48
cg04787317	MIR26A1	1.82e-48
cg01657380	NPFF	1.99e-48
cg08954353	RP11-875O11.2	2.46e-48
cg03719128	ZEB1	2.57e-48
cg11405655	RP11-54O7.18	2.59e-48
cg08078058	CTC-490E21.12	2.65e-48
cg19196335	HOXA5	2.82e-48
cg09951047	MIR3074	3.05e-48
cg19395441	C12orf43	3.33e-48
cg00446235	RP11-544M22.13;TSTD1	4.62e-48
cg01568521	PPP1R18	4.94e-48
cg14549256	FAM193A	5.19e-48
cg08794940	FLOT1;XXbac-BPG252P9.10	6.45e-48
cg03721058	HYAL2	7.57e-48
cg12700039	RP11-353N14.7	8.7e-48
cg21234123	RP11-413M3.4	9.93e-48
cg27309702	CTD-2600O9.2	1.34e-47
cg13153865	RNU6-925P;OSGIN2	1.77e-47
cg24938752	LINC01565	1.88e-47
cg03138446	AL513523.2;SLC27A3	2.25e-47
cg09491897	CTD-2561B21.3	2.35e-47
cg01954305	MIR30D	2.47e-47
cg14037250	RP11-374P20.4	2.92e-47
cg23704082	RP11-432B6.3	3.17e-47
cg09235583	FLOT1;XXbac-BPG252P9.10	3.46e-47
cg00863661	RP11-161M6.6	3.79e-47
cg21737444	LGALS1	4.21e-47
cg10622536	SH3D21	4.44e-47
cg27552378	RP11-461A8.4	4.75e-47
cg27318507	RP11-288H12.3	5.64e-47
cg15169940	TBCB;AD001527.4	5.9e-47
cg03679504	LRRC2	6.66e-47
cg13725579	CTC-571O20.1	7.73e-47
cg05232694	CEBPB-AS1	7.9e-47
cg03283569	RABEPK	8.77e-47
cg12788467	HNF1B	8.84e-47
cg02560808	VAC14	1.16e-46
cg04267184	GNRH2	1.17e-46
cg01785473	FAM129B	1.34e-46
cg08379987	TEX26	1.5e-46
cg07006551	FBXO2	1.93e-46
cg03078239	RP11-10A14.6	2.26e-46
cg06711306	CTC-231O11.1	2.37e-46
cg16172923	MIR4655	2.71e-46
cg09143801	RP11-68I18.10	2.72e-46
cg00909232	SLC6A12	3.03e-46
cg09103232	SLC2A4	3.24e-46
cg09577651	RP4-576H24.4;SIRPB1	3.54e-46
cg09916853	TSPAN33	3.79e-46
cg14433074	FLOT1;XXbac-BPG252P9.10	4.17e-46
cg09061207	SNORD117	4.53e-46
cg04623270	CTB-134F13.1	4.74e-46
cg09719850	DSTNP2	7.89e-46
cg09518441	AC004490.1	1.09e-45
cg00329300	RP11-544M22.13;TSTD1	1.51e-45
cg19643053	HOXA5	1.54e-45
cg24861272	ZEB1	1.6e-45
cg02247178	TEX26	1.8e-45
cg26192720	MIR6748	1.99e-45
cg14216068	HOXA-AS2	2.15e-45
cg25406989	RP11-227D13.1	2.43e-45
cg27162435	KCNAB3	2.71e-45
cg14292522	RP11-175P13.2	3e-45
cg23436819	RP11-789C17.3	3.52e-45
cg01220257	MIR8085	4.91e-45
cg02225720	CTD-3195I5.3	5.49e-45
cg24948792	SFXN3	6.5e-45
cg23528037	TMEM88	6.56e-45
cg26739829	PANK1;RP11-80H5.5	6.91e-45
cg10488685	MIR942	7.37e-45
cg06383135	USP46-AS1	8.1e-45
cg23196081	TSGA10IP	9.13e-45
cg02766539	RP11-619I22.1	1.02e-44
cg16096308	KLHL3	1.09e-44
cg08971171	MIR25;MIR93;MIR106B	1.14e-44
cg01574231	UNC13D	1.32e-44
cg14022913	NEIL3	1.44e-44
cg27218212	DARS	1.69e-44
cg23994112	RP11-936I5.1	1.92e-44
cg14058329	HOXA5	2.22e-44
cg01206410	NID1	2.26e-44
cg18290190	RP11-1260E13.1	2.28e-44
cg04383058	PITPNM1	3.19e-44
cg03625149	LSMEM1	3.19e-44
cg05289394	FOXS1	3.9e-44
cg27241576	RP11-274A11.4	4e-44
cg24393699	DENND1B	4.14e-44
cg00240860	CTB-193M12.1	4.35e-44
cg02365945	RP11-286H14.4	4.73e-44
cg24888989	KIAA1143;KIF15	5.86e-44
cg17883035	MIR8085	6.88e-44
cg25753631	HIST1H2BPS1;HIST1H2APS1;AL512384.1	7.17e-44
cg16291917	SNORA38	7.9e-44
cg15692229	EGFR-AS1	8.44e-44
cg26256521	RP11-982M15.6	8.6e-44
cg17865114	TNFRSF12A	8.73e-44
cg17723299	DENND1B	9.24e-44
cg17232217	SPON2;CTBP1-AS	9.27e-44
cg27545367	FLOT1	9.97e-44
cg23379208	PRR3	1.03e-43
cg24701309	RP11-10J21.2	1.09e-43
cg01964852	HOXA-AS2	1.13e-43
cg09263904	MIR26A2	1.14e-43
cg24174145	KRT80	1.21e-43
cg24389585	HOXA5	1.22e-43
cg27023597	MIR21	1.39e-43
cg11840804	GPR182	1.5e-43
cg09343092	HOXA5	1.61e-43
cg21190595	RNU1-91P	1.62e-43
cg22691524	SENP2	1.66e-43
cg14287742	BLZF1	1.76e-43
cg07599144	AC135048.13;ORAI3	1.84e-43
cg02993070	FERMT2	1.97e-43
cg14424530	SLC7A1	2.12e-43
cg22002216	ACSF2	2.13e-43
cg26024874	RP11-383D22.1	2.28e-43
cg02978297	RP5-1033H22.2	2.41e-43
cg25021051	RP11-983P16.4	2.56e-43
cg02046017	SHANK2-AS3	2.76e-43
cg05149386	RP11-351I24.1;ADM	2.83e-43
cg03625953	RP11-667K14.14	2.92e-43
cg17656474	IQSEC3	4.25e-43
cg21936959	MRGPRF	4.5e-43
cg20887442	RP11-849H4.4	5.09e-43
cg17602167	SRSF3	5.22e-43
cg18899220	ST6GALNAC4P1	5.85e-43
cg16309127	PFDN5	6.19e-43
cg18102633	PLVAP	6.72e-43
cg04340203	RNU6-9	7.01e-43
cg13353999	KLHL14	7.56e-43
cg01203113	RP11-461A8.4	9.68e-43
cg24016624	RELB	9.72e-43
cg13718870	RP11-374P20.4	9.88e-43
cg11667101	TAF5	1.01e-42
cg00834924	CTD-2262B20.1	1.07e-42
cg13856573	GNG3	1.08e-42
cg23193870	U47924.31;PTPN6	1.09e-42
cg07034561	RSPH1;SLC37A1;AP001625.4	1.14e-42
cg14202610	AMN1;RP11-467L13.7	1.22e-42
cg06222087	MIR3195	1.26e-42
cg14658493	HOXA5	1.45e-42
cg20455395	CNP	1.49e-42
cg01492656	N4BP2	1.57e-42
cg19929355	TEC	1.58e-42
cg03207666	HOXA5	1.58e-42
cg05159909	RP11-603J24.6	1.6e-42
cg03308399	HOXA-AS2	1.93e-42
cg02216727	GJD3	2.14e-42
cg22242345	B3GNTL1	2.4e-42
cg05629195	ABCF3	2.54e-42
cg06650260	NR0B2	2.67e-42
cg16235861	SLC35G1	2.71e-42
cg04815707	WI2-87327B8.2	2.72e-42
cg02331902	LUCAT1;RP11-213H15.4	2.73e-42
cg14108978	RP11-800A3.7	2.94e-42
cg19683073	SERINC5	3.04e-42
cg18939260	MTSS1	3.16e-42
cg24482288	MIR181C;MIR181D	3.73e-42
cg11613741	KIAA0408	3.77e-42
cg14876315	CTB-35F21.1	4.27e-42
cg13230606	HNF1B	4.43e-42
cg17977470	TMEM88	4.92e-42
cg04601090	PLEKHG5	4.93e-42
cg07577997	MAB21L3	5.05e-42
cg18020072	SNORA38	5.3e-42
cg23671708	TMEM88	5.52e-42
cg13092901	SCO2	5.79e-42
cg13492337	PXDNL	6.19e-42
cg05253110	RP5-842K16.2	6.43e-42
cg14013695	HOXA5	6.77e-42
cg15034300	TRABD2A	6.91e-42
cg26425555	RP11-260E18.1;CTC-461F20.1	7.23e-42
cg15409097	ARHGEF25	8.24e-42
cg06783429	LRRC4	8.7e-42
cg01323381	HOXA5	9.07e-42
cg24254387	TCTEX1D4;BTBD19	1.11e-41
cg08301503	LINC00336	1.24e-41
cg12179658	HRH1	1.26e-41
cg16354756	CYCSP52	1.4e-41
cg06339606	ANP32A	1.54e-41
cg16365807	PLAC4	1.54e-41
cg03024301	TRAM2-AS1	1.56e-41
cg09099572	SLC9A5	1.7e-41
cg27433088	GALNT7	1.7e-41
cg00577167	ALDOB	1.85e-41
cg03103944	TMEM184A	2.04e-41
cg05020510	NOV	2.12e-41
cg05643592	TOMM40L;MIR5187	2.54e-41
cg23286295	LIG1;ZNF114	2.65e-41
cg26214922	C6orf47-AS1	2.87e-41
cg08203284	HOXA4	2.96e-41
cg13758780	DAB2IP	3.48e-41
cg18852313	C2orf61	3.86e-41
cg10126372	PXDNL	4.41e-41
cg07371589	RP11-68I18.10	5.05e-41
cg00619628	RNU6-302P	5.2e-41
cg25790133	FAM193A	5.4e-41
cg09222577	RP1-168P16.2	5.61e-41
cg14164956	CDK11A	5.88e-41
cg11613559	PHACTR2P1	6.01e-41
cg11520866	TMEM262;VPS51	6.05e-41
cg26435670	BMPR1A	6.28e-41
cg07288557	SLC38A4	6.63e-41
cg25647415	SEMA3B	8.01e-41
cg07007050	AMN1;RP11-467L13.7	8.05e-41
cg18542050	AC068641.1	8.78e-41
cg24946253	PXDNL	9.25e-41
cg22697239	RP11-58K22.5	1.02e-40
cg26779305	MIR744	1.39e-40
cg00377497	PTK2B	1.52e-40
cg09401639	TRAJ29;TRAJ28	1.62e-40
cg05780177	DENND1B	1.68e-40
cg05860190	POFUT1	1.76e-40
cg16768376	ST6GALNAC4P1	1.84e-40
cg05309179	COLCA1	1.97e-40
cg15975802	U47924.31;PTPN6	2.11e-40
cg02087565	RP5-894D12.5	2.49e-40
cg03760191	RP11-573G6.8	2.55e-40
cg18458509	SLC22A18	2.74e-40
cg09538582	KRT35	3.52e-40
cg07938459	U47924.31;PTPN6	3.81e-40
cg23320056	RP11-336K24.12	4.46e-40
cg01662334	HIBADH	4.53e-40
cg00296779	PNPLA1	4.59e-40
cg17272331	RP3-467N11.1	4.93e-40
cg04121771	TM4SF4	5.3e-40
cg23028178	NID1	5.86e-40
cg19382808	RP11-345P4.7	5.88e-40
cg18848959	MIR3195	6.01e-40
cg25457027	PROC	6.02e-40
cg16929739	HRH1	6.07e-40
cg08468689	GHDC	6.17e-40
cg22005145	GPX3	6.93e-40
cg16269755	RP11-404E16.1	7.36e-40
cg10960375	ZBTB47	7.4e-40
cg09354317	RP5-966M1.6;MUSTN1	7.49e-40
cg17389738	FLOT1	7.6e-40
cg06457736	HRH1	7.67e-40
cg08737543	PGAM1P11	7.71e-40
cg19399165	EMILIN1	7.89e-40
cg09917807	AMN1;RP11-467L13.7	8.6e-40
cg01963002	LMTK2	8.67e-40
cg07141504	LINC00887	8.79e-40
cg24437523	ATP1A2	9.45e-40
cg19449286	TMEM88	9.85e-40
cg26123029	AC093326.1	1.05e-39
cg14435109	SGPP2	1.13e-39
cg21023770	SPATA25;CTSA	1.16e-39
cg27490101	ADPRHL1	1.53e-39
cg22096916	TMSB4XP6	1.53e-39
cg06136702	PSORS1C1	1.56e-39
cg14097773	DCUN1D2-AS	1.57e-39
cg08070327	HOXA5	1.68e-39
cg23197007	PPP1R18	1.74e-39
cg04164184	RP11-13J10.1	1.77e-39
cg11917694	STAMBPL1	1.84e-39
cg00282953	MIR1271	1.99e-39
cg14377922	AC011239.2	2.08e-39
cg06964030	MIR3618;MIR1306	2.09e-39
cg12742645	RP11-1260E13.1	2.24e-39
cg09468836	CTD-2105E13.15	2.52e-39
cg06289138	LINC00336	2.59e-39
cg08457178	FLOT1	2.88e-39
cg05140736	SGSH	3.03e-39
cg24553170	BEND5	3.15e-39
cg21184711	RP5-1166A24.1	3.16e-39
cg20095656	PFN3	3.18e-39
cg07153966	HOXA-AS2	3.22e-39
cg09880291	HOXA5	3.5e-39
cg12945194	GPHA2	3.65e-39
cg14063191	ZDHHC12;RP11-545E17.3	3.74e-39
cg02176069	PYGM	4.19e-39
cg08545416	CLDN19	4.41e-39
cg00012698	RP11-3D4.2	4.83e-39
cg01949455	RP11-247A12.8;RP11-247A12.2	4.97e-39
cg18757468	SIPA1	5.26e-39
cg13474370	RBPMS2	5.28e-39
cg21002651	CASP1	5.32e-39
cg12840248	HLA-DMB	5.35e-39
cg21064451	LGALS1	5.43e-39
cg10203922	HHIP	5.55e-39
cg02779592	SRPX2	5.75e-39
cg24805681	AC026956.1	6.03e-39
cg18581950	GPBAR1	6.2e-39
cg00786685	AC010136.2	6.75e-39
cg01419914	MIR4740	7.52e-39
cg08080060	CTC-490E21.12	8.07e-39
cg17283601	PMAIP1	9.13e-39
cg26827653	FEZ1	9.24e-39
cg19256731	RP5-858L17.1;SIRPA	9.29e-39
cg21872908	C1orf177	9.6e-39
cg02459416	TMEM88	1.01e-38
cg04365973	RHOT2	1.01e-38
cg18891081	C2orf61	1.15e-38
cg24173629	CTA-221G9.10	1.19e-38
cg07948432	RP11-867G23.12	1.19e-38
cg03631656	ANGPT2	1.23e-38
cg14882265	HOXA5	1.25e-38
cg13048008	RP11-849H4.4	1.3e-38
cg11264539	GNG3	1.33e-38
cg08995609	RIN1	1.36e-38
cg26846864	MEFV	1.37e-38
cg14747072	STAC3	1.39e-38
cg26808293	THOC6	1.46e-38
cg24496614	FTH1	1.63e-38
cg25731261	BBC3	1.63e-38
cg12150256	HYAL2	1.75e-38
cg04176254	AGRP	1.75e-38
cg22817638	CTA-228A9.3	2.1e-38
cg17856907	MIR107	2.27e-38
cg20639948	ZFAND1;CHMP4C	2.39e-38
cg20055230	AC012476.1	2.42e-38
cg05229035	RNU6-244P	2.5e-38
cg06614257	TMEM88	2.58e-38
cg07080372	PANO1	2.58e-38
cg24854681	MIR25;MIR93;MIR106B	2.62e-38
cg25106707	C1QTNF7	2.73e-38
cg03077492	CCL28	2.73e-38
cg13751330	RP11-334J6.7;POMT1	2.81e-38
cg21374324	RP11-274B21.12;RP11-274B21.3	2.95e-38
cg26750742	C2orf80	3.1e-38
cg10396171	LA16c-366D1.3	3.17e-38
cg04520242	RP3-365O12.2	3.23e-38
cg09494609	RP11-983P16.4	3.34e-38
cg06518763	TMEM88	3.52e-38
cg03747456	KRT80	3.78e-38
cg02101355	MIR125B1	4.17e-38
cg19410770	XXbac-BPG308K3.5	4.48e-38
cg06615154	S100A4;S100A3	4.78e-38
cg16180552	NCKIPSD	4.83e-38
cg12374682	GPHA2	5.07e-38
cg00044097	FHL2	5.28e-38
cg18677603	LINC00887	5.49e-38
cg00843416	RAMP2-AS1	6.35e-38
cg18305324	SNORA38	6.64e-38
cg06624146	C10orf90	6.66e-38
cg06055845	MIR641	8.61e-38
cg21304833	ADPRHL1	9.34e-38
cg03719978	TMEM88	9.55e-38
cg12479660	SEMA3B	9.92e-38
cg04898939	SMG1P5;RP11-347C12.12	1.04e-37
cg03182958	SGPP2	1.05e-37
cg05617798	AURKB	1.06e-37
cg14189782	EHBP1L1	1.06e-37
cg02198625	RP4-576H24.4;SIRPB1	1.11e-37
cg00280812	KRT80	1.12e-37
cg00502926	RNASE7	1.12e-37
cg02426623	TSPAN9-IT1	1.15e-37
cg07097863	LGR6	1.2e-37
cg12651712	CYP4A11	1.35e-37
cg23752985	AC016753.2	1.41e-37
cg11065271	SYTL3	1.44e-37
cg24898753	FTH1	1.45e-37
cg15831722	DENND4B	1.57e-37
cg06162324	FXYD4	1.67e-37
cg02916118	SNORD41	1.74e-37
cg03613649	RP11-104H15.9;FGF11;RP11-104H15.10	1.83e-37
cg13399261	IL1R1	2.31e-37
cg19756430	C1orf86;RP11-181G12.4	2.42e-37
cg08818984	NR3C1	2.45e-37
cg22229016	SEMA3B	2.6e-37
cg05109569	HOXA-AS2	2.74e-37
cg11740103	ACTR3C	2.9e-37
cg05774699	HOXA5	3.09e-37
cg20266715	CAPN2	3.33e-37
cg14196790	SLC22A5	3.34e-37
cg06188545	PEAR1	3.57e-37
cg24640577	LINC01341	3.68e-37
cg13591848	SFXN3	3.69e-37
cg21214613	CLCNKA	3.78e-37
cg20372821	HCRT	4.05e-37
cg21217846	S100A5	4.17e-37
cg22940022	MIR25;MIR93;MIR106B	4.23e-37
cg18165914	TMPRSS5	4.49e-37
cg09701880	MIR4435-1HG;AC017002.2	4.84e-37
cg12663811	PLEKHN1	5.71e-37
cg10298741	AC132068.1	5.78e-37
cg03597243	C6orf47	5.82e-37
cg18101140	AP003419.11;CLCF1;CTC-1337H24.4	5.95e-37
cg19532939	ART4	6.14e-37
cg02485345	SLC25A34	6.18e-37
cg09535960	RP11-177H13.2	6.47e-37
cg07981588	YWHAZ	6.64e-37
cg23654174	STIL	6.83e-37
cg11887214	PYGM	6.94e-37
cg19561615	DIS3L	7.95e-37
cg06357685	RP11-424M24.3	8.3e-37
cg15735446	THY1	8.41e-37
cg19433021	NFYB	8.87e-37
cg22628873	GGT6	8.92e-37
cg24639100	RP11-762I7.5;TMEM198B	9.28e-37
cg26667091	SIPA1	9.4e-37
cg00170236	MIR25;MIR93;MIR106B	1.01e-36
cg00477978	HPX	1.05e-36
cg03368099	HOXA5	1.05e-36
cg19539004	LIF	1.05e-36
cg08055330	CCDC183-AS1	1.06e-36
cg12104266	ZNF335	1.08e-36
cg07279162	PGBD3	1.18e-36
cg16411103	STARD13-AS	1.34e-36
cg03434029	TCTEX1D4;BTBD19	1.37e-36
cg10346364	AP003419.11;CLCF1;CTC-1337H24.4	1.43e-36
cg00111977	MYOZ1	1.52e-36
cg05064489	SEC31B	1.54e-36
cg24776350	TMEM88	1.58e-36
cg24670715	ANGPT2	1.68e-36
cg07132223	ARHGEF25	1.83e-36
cg23621496	RD3	1.98e-36
cg09887906	METTL21EP	2.14e-36
cg23840493	LENEP	2.23e-36
cg06913958	BCL10	2.54e-36
cg12538674	HOXA-AS2	2.74e-36
cg00425827	AC034228.2	2.77e-36
cg01972009	PITPNM1	2.94e-36
cg14652095	HIST1H1A	3e-36
cg07657776	UBE3B	3.15e-36
cg00386007	RP11-523O18.7;LRRC18	3.37e-36
cg19699090	CPNE5	3.47e-36
cg06422757	KCTD20	3.53e-36
cg07151443	XXbac-BPG181M17.5	3.63e-36
cg03547181	RP11-335O13.7	3.71e-36
cg02402368	ANGPT2	3.84e-36
cg17915961	LDB1	3.99e-36
cg14393609	RP11-479O9.3	4.23e-36
cg16026035	RP11-136K7.2	4.37e-36
cg12217625	C1orf204	4.75e-36
cg00183886	USP46-AS1	5.08e-36
cg06586763	SNX29P2	5.37e-36
cg22610645	ARHGEF25	5.41e-36
cg26709300	RP11-455F5.3	6.11e-36
cg18767920	RP11-322E11.5;AC007998.1	6.41e-36
cg05447916	VWA7	6.42e-36
cg19569684	MZB1	6.48e-36
cg10296062	PYGM	6.53e-36
cg05446471	HDAC11-AS1	6.82e-36
cg00976797	LA16c-385E7.1	7.01e-36
cg07804577	SERPINF2	7.32e-36
cg09858176	CLCNKA	7.61e-36
cg02872426	DDO	7.84e-36
cg07164639	DDO	8.09e-36
cg19662219	CHRM5	9.33e-36
cg07484827	CHRNA10	9.52e-36
cg25144135	TNFRSF18	9.93e-36
cg07580475	SEMA3B	1.03e-35
cg20196966	RP11-385F7.1;CD2AP	1.07e-35
cg09179347	AGRP	1.08e-35
cg20585500	GPHA2	1.09e-35
cg07972322	TMEM140	1.12e-35
cg01154966	TRPC4AP	1.16e-35
cg07640412	SNRK	1.17e-35
cg05052407	RP11-295D4.1	1.22e-35
cg20162206	KLHL14	1.23e-35
cg02660440	MIR199A1	1.25e-35
cg08462306	TCTEX1D4;BTBD19	1.28e-35
cg19005368	PRRG4	1.33e-35
cg12966875	SLPI	1.35e-35
cg03407567	MYL6B	1.39e-35
cg13678641	AURKB	1.39e-35
cg19251656	RP11-413P11.1	1.46e-35
cg26256192	MIR8085	1.57e-35
cg25181284	GPD1	1.59e-35
cg03761471	AC093673.5;ZYX	1.64e-35
cg18544564	COL3A1;AC066694.1	1.65e-35
cg17665883	AL078633.1	1.72e-35
cg01550161	LAMB4	1.79e-35
cg05390307	FEZ1	1.85e-35
cg15001032	DDC	2.09e-35
cg02901136	S100A12	2.37e-35
cg04194294	PRRT1	2.46e-35
cg14948795	CDK2AP1	2.73e-35
cg06445611	GABRR2	2.82e-35
cg14830402	RP11-414H17.5	2.9e-35
cg00180097	MIR6832	3.02e-35
cg04033580	ADORA2A-AS1	3.27e-35
cg08888203	FANCD2OS	3.3e-35
cg01745370	GCC2	3.52e-35
cg05231332	RP11-1260E13.1	3.54e-35
cg16791210	RETSAT;ELMOD3	3.56e-35
cg24176731	PLEKHB1	3.62e-35
cg13568622	ALDOB	3.7e-35
cg10644544	RP11-552F3.9	3.72e-35
cg00009871	METTL21EP	3.8e-35
cg00253681	ART4	3.85e-35
cg25944620	MYOZ1	4.1e-35
cg19131731	LIF	4.16e-35
cg17415576	MIR195	4.16e-35
cg20160885	RNF216P1	4.17e-35
cg19731612	NSD1	4.25e-35
cg24397007	FLJ31356;RP11-373D23.2	4.29e-35
cg26493247	CTD-2135D7.2	4.95e-35
cg10970251	PANO1	5.26e-35
cg01957582	C22orf24	5.49e-35
cg13614409	TEX26	5.85e-35
cg25934064	NT5DC2	6.23e-35
cg23341182	BLOC1S2	6.95e-35
cg20686446	MED25	7.04e-35
cg03505866	SUSD6	7.42e-35
cg16764778	C15orf62	8.34e-35
cg20225745	KRT80	8.42e-35
cg20169521	MPP4	8.47e-35
cg01356044	MTSS1L	8.51e-35
cg23689428	LINC01101	1.06e-34
cg02259384	ACOX2	1.12e-34
cg01443318	RP11-297D21.2	1.12e-34
cg20903926	C1orf177	1.13e-34
cg00750630	RP11-255G12.2	1.13e-34
cg03275648	MIRLET7D	1.14e-34
cg26318627	RP11-21A7A.3	1.21e-34
cg24869815	SMIM6	1.23e-34
cg13155823	RP11-26J3.4	1.24e-34
cg24704593	MACC1;AC005083.1	1.34e-34
cg01038597	AC135050.1	1.36e-34
cg08823182	S100A5	1.39e-34
cg17432857	HOXA5	1.47e-34
cg13488078	MIR6843	1.57e-34
cg18230216	NYX	1.59e-34
cg00424169	TEX26	1.69e-34
cg00863099	LINC00152	1.73e-34
cg12430701	HPCAL1	1.73e-34
cg08484337	SNORA38	1.74e-34
cg13764778	CHAD	1.77e-34
cg03814826	C22orf24	2e-34
cg08296903	CTD-2135D7.2	2.01e-34
cg14068180	STRA13	2.07e-34
cg01704739	RP11-278L15.2	2.35e-34
cg09287356	METTL21EP	2.37e-34
cg11499699	PRPSAP1	2.38e-34
cg09563102	FAM110C	2.47e-34
cg23480341	SLPI	2.83e-34
cg10378667	PSMD9;RP11-87C12.2	2.85e-34
cg20823348	AC068057.1	3.07e-34
cg14614094	EXOSC2	3.31e-34
cg06826710	LINC01341	3.33e-34
cg17391983	TMEM184A	3.34e-34
cg05209483	CD68	3.41e-34
cg22731981	ELF5	3.55e-34
cg12416561	C4orf22	3.57e-34
cg25363789	AP003068.23	3.71e-34
cg22184989	RP11-473C18.3	3.8e-34
cg26640467	GRM8	3.82e-34
cg02724472	LRRC17	3.82e-34
cg12941836	RP5-966M1.6;MUSTN1	4.02e-34
cg24091438	LRRC61	4.48e-34
cg06413398	DDO	4.54e-34
cg25807071	PPP1R18	4.57e-34
cg13527735	FILIP1L	4.64e-34
cg00876266	AC104532.4	4.66e-34
cg04956511	PTPN6	4.7e-34
cg01341355	SNORD117	4.74e-34
cg13982601	RP11-73M18.6	4.8e-34
cg12778178	UCKL1-AS1	4.89e-34
cg22079077	C15orf62	5.11e-34
cg10078898	MIR6717;TPPP2;AL161668.5	5.21e-34
cg11135080	MIR30C1	5.27e-34
cg02447095	RP11-394B2.5	5.29e-34
cg01392313	LINC00336	5.4e-34
cg22378853	NNAT	5.43e-34
cg01398941	C1orf177	5.51e-34
cg07127410	ZNRF3-AS1	5.53e-34
cg16529034	RNASE8	5.56e-34
cg03743074	RP11-77H9.2	5.75e-34
cg25505106	RP11-227D13.1	6.2e-34
cg09325711	RALA	6.6e-34
cg04004607	MRPL28	6.92e-34
cg15252243	TIGD2	7.03e-34
cg27587645	LLNLR-304A6.2	7.18e-34
cg21500342	SOCS3;RP11-806H10.4	7.46e-34
cg03897318	TWF2;RP5-1157M23.2	7.78e-34
cg06032021	MYOZ1	8.46e-34
cg21641458	HOXA5	9.18e-34
cg17131183	SH3D21	9.2e-34
cg14891410	WT1;WT1-AS_3;WT1-AS_6	9.86e-34
cg09361653	CTD-2561B21.3	9.97e-34
cg20632887	ATP1A2	9.97e-34
cg08456334	RP11-126K1.9	1.05e-33
cg07830644	ATP6V0E1	1.08e-33
cg00674681	PDLIM1P1	1.08e-33
cg03945021	LINC01567	1.13e-33
cg19916794	SLC25A34	1.15e-33
cg17495555	ZBTB38	1.26e-33
cg14891195	KLHL14	1.28e-33
cg06532268	HIST1H2BPS1;HIST1H2APS1;AL512384.1	1.3e-33
cg05516842	MIR1301	1.3e-33
cg15701111	KRT81	1.37e-33
cg11155356	SLA	1.37e-33
cg25091527	RP11-212E4.1	1.47e-33
cg04127587	PFN3;GRK6	1.56e-33
cg25016070	PKM	1.6e-33
cg04228042	ART4	1.61e-33
cg04614923	C12orf74	1.61e-33
cg04856022	PRRT1	1.66e-33
cg14549976	RP11-154H12.3	1.7e-33
cg04009429	CLDN15	1.86e-33
cg06023161	SNORA38	1.9e-33
cg02299136	GTF2H2C	1.9e-33
cg15526213	RP11-168L22.2	1.95e-33
cg24075326	C6orf136	2e-33
cg11270656	GPIHBP1	2.01e-33
cg23261919	RP13-49I15.6	2.12e-33
cg26023912	HOXA5	2.15e-33
cg08093097	C2orf80	2.22e-33
cg05708656	SNORD71	2.25e-33
cg00246451	RP11-336K24.12	2.28e-33
cg26803803	MIR1301	2.6e-33
cg26065841	CHAC1	2.61e-33
cg03859915	BRE	2.63e-33
cg10259889	MIR4285	2.68e-33
cg14851114	HIBADH	2.78e-33
cg09482780	TMEM88	2.8e-33
cg00502190	RP11-284F21.10	2.85e-33
cg24042452	TSACC	2.92e-33
cg02912007	RP11-27M24.2	2.96e-33
cg14067761	AC011239.2	3.02e-33
cg25700533	C15orf62	3.32e-33
cg15702185	MIRLET7A3;MIR4763;MIRLET7B	3.58e-33
cg18476993	MIR671;RP4-548D19.3	3.62e-33
cg16672223	RP11-274A11.5;RP11-274A11.3	3.74e-33
cg16290689	TEX26	3.76e-33
cg03578548	RP13-60M5.2	3.8e-33
cg09632936	CHRNA9	4.28e-33
cg16519758	MIR648	4.29e-33
cg03328201	MIR301B;MIR130B	4.75e-33
cg21990700	C1RL-AS1	4.83e-33
cg02121517	C6orf47-AS1	4.97e-33
cg00460776	RNU4-2;RNU4-1	5e-33
cg15894581	FBXL22	5.1e-33
cg04275695	ZC3H12D	5.29e-33
cg09468902	PEBP1P2	5.32e-33
cg06676563	ABCF3	5.36e-33
cg14209957	RP11-381O7.3;AQP7P4	5.6e-33
cg17501395	ZC3H12D	5.63e-33
cg15381251	C22orf42	5.77e-33
cg19305938	MIR4288	5.84e-33
cg19006050	RP11-500G10.5;CTAGE7P	6.17e-33
cg18479961	MIR671	6.17e-33
cg18853199	RP11-285E9.6	6.31e-33
cg13240116	HOXA-AS2	6.46e-33
cg25796050	UGT1A5	6.58e-33
cg18228531	RP11-982M15.6	6.7e-33
cg16782084	RP11-202A13.1	6.7e-33
cg26758857	APOL1	6.99e-33
cg15924693	RPL35AP4;KIFC1	7.22e-33
cg20440575	CCNB1	8.41e-33
cg25677394	HRH1	8.46e-33
cg01824138	RP4-734G22.3	8.88e-33
cg08688393	MIR629	8.95e-33
cg26705724	C15orf62	9.69e-33
cg16777510	STAT5A	1.02e-32
cg17001627	RNU5E-10P;RP11-76I23.7	1.03e-32
cg21609154	MCF2L-AS1	1.21e-32
cg08566449	CSNK2B;CSNK2B-LY6G5B-562	1.22e-32
cg13895322	MLF2	1.34e-32
cg11574055	NAP1L4P1	1.36e-32
cg27384476	AP001189.4	1.37e-32
cg15875502	C6orf47;Y_RNA	1.42e-32
cg16242238	CGB8;CTB-60B18.15	1.51e-32
cg00411072	RP11-357H14.16	1.58e-32
cg02519286	RP5-940J5.3;GAPDH	1.6e-32
cg01980495	RP11-264I13.2	1.67e-32
cg16110455	CLCNKA	1.68e-32
cg00804587	CLDN16	1.76e-32
cg19204946	FCAMR	1.77e-32
cg03891808	C6orf47;Y_RNA	1.82e-32
cg08636620	LRRC17	1.84e-32
cg26119529	RP11-154D3.1	1.96e-32
cg07134230	RP11-284F21.7	2.02e-32
cg00812578	C6orf47-AS1	2.29e-32
cg12383352	VWA7	2.45e-32
cg05735674	LA16c-325D7.2	2.47e-32
cg02852421	MIR629	2.5e-32
cg06195280	XAF1	2.58e-32
cg09761155	RP11-438N5.2	2.63e-32
cg05285228	POT1	2.65e-32
cg13965612	MIR199A1	2.7e-32
cg16982077	ECSCR;ECSCR	2.93e-32
cg25506432	HOXA5	3.14e-32
cg19033654	FLOT1;XXbac-BPG252P9.10	3.27e-32
cg02417084	AC009166.5	3.4e-32
cg18794664	ZMYND12	3.43e-32
cg13320947	CTD-2105E13.14	3.45e-32
cg08415592	APOL1	3.48e-32
cg22585988	PVRL4	3.72e-32
cg09499482	FBXL22	3.73e-32
cg10395101	ANGPT2	3.81e-32
cg11575922	LINC00957	3.93e-32
cg20342105	GNG3	4.25e-32
cg14191360	MET	4.37e-32
cg04433035	HNF1B	4.38e-32
cg14042308	RIN1	4.4e-32
cg12729838	MIR6843	4.88e-32
cg16669650	C6orf132	5.74e-32
cg10055471	NR0B2	5.77e-32
cg00551143	TRIL	5.83e-32
cg15095917	CD68	5.9e-32
cg02625536	ARPC3P1	5.92e-32
cg20398408	RP11-676J12.6	6.02e-32
cg08935410	RP11-543P15.1	6.11e-32
cg07049592	HOXA5	6.12e-32
cg02477448	H1F0	6.68e-32
cg01233487	ATP4B	7.8e-32
cg24829483	C1QTNF7	7.88e-32
cg26904702	AL513523.2;SLC27A3	8.03e-32
cg16728604	KIAA1522	8.17e-32
cg18939241	RP11-2C7.1	8.95e-32
cg12017745	SIPA1	9.39e-32
cg03422527	XXbac-BPG300A18.13	9.46e-32
cg12861170	YJEFN3	9.54e-32
cg21496948	RP11-73M18.6	9.58e-32
cg25390165	HOXA5	9.78e-32
cg09663494	EXOC3L1	1.04e-31
cg07234028	NELFA;C4orf48	1.05e-31
cg09220167	USP19	1.06e-31
cg00941241	CLSTN1	1.09e-31
cg24025538	PTOV1-AS2;AC018766.4	1.1e-31
cg17331566	B4GALT2	1.12e-31
cg09988676	CHRND	1.16e-31
cg12864853	TPBG	1.17e-31
cg21393619	SNORD102;SNORA27	1.22e-31
cg07873848	SGPP2	1.23e-31
cg00525931	RRN3P2	1.23e-31
cg10031651	LRRC2	1.29e-31
cg09230812	ARHGAP19-SLIT1;ARHGAP19	1.36e-31
cg25719851	U47924.31;PTPN6	1.43e-31
cg06800840	OASL	1.44e-31
cg06761584	FLNC	1.46e-31
cg03548512	ASCC1;Y_RNA	1.46e-31
cg13704497	SNORA38	1.47e-31
cg19509076	RP11-521B24.5;CRIP2	1.51e-31
cg18621852	FANCD2OS	1.52e-31
cg11211563	ARHGEF25	1.52e-31
cg01171339	HIST1H2BPS2;HIST1H2AL	1.52e-31
cg13462544	FAM110D	1.66e-31
cg07753598	MIR26B	1.72e-31
cg05155784	RP1-7G5.6	1.77e-31
cg17004733	USP24;RP11-101C11.1	1.79e-31
cg18082788	ZC3H12D	1.82e-31
cg09076584	RP11-192H23.4;SGK494	1.95e-31
cg17450930	REPIN1;ZNF775	1.97e-31
cg01750375	WISP2	2.07e-31
cg20174247	RP11-142M10.2	2.14e-31
cg12690119	ZBTB38	2.36e-31
cg04012931	FLOT1;XXbac-BPG252P9.10	2.42e-31
cg08978665	IL32	2.44e-31
cg02713153	GRINA	2.51e-31
cg05792169	ADAMTS7P4	2.66e-31
cg04472592	KRT80	2.81e-31
cg04929355	IL18	2.83e-31
cg17021265	RP11-385F7.1;CD2AP	2.83e-31
cg03891346	MIR125B1	2.84e-31
cg02882530	RP11-440L14.1	2.86e-31
cg13957558	CTC-510F12.4	2.87e-31
cg02384546	ZNF750	2.88e-31
cg00396865	SNORA43;SNORA17	2.98e-31
cg12061219	AC092171.4	3.1e-31
cg03730709	Metazoa_SRP	3.2e-31
cg00906833	MIR135A1	3.25e-31
cg00410926	FAM166B	3.38e-31
cg00117965	MSLN	3.42e-31
cg04080005	RP11-216P6.2	3.43e-31
cg14856606	C4BPA	3.62e-31
cg03888064	TSACC	3.67e-31
cg23417523	ADPRHL1	3.68e-31
cg03818307	ECM1	3.87e-31
cg08870588	FAM104A	4e-31
cg20442697	LRRC17	4.25e-31
cg17412043	S100A13;RP1-178F15.5;RP1-178F15.4	4.49e-31
cg08060501	RP11-295D4.1	4.62e-31
cg13314965	TM4SF19-TCTEX1D2;TM4SF19	4.86e-31
cg17758721	SNRPB	4.91e-31
cg14202186	U2AF2	4.98e-31
cg04562611	PIGQ;NHLRC4	5.03e-31
cg02553054	SMARCD1	5.19e-31
cg26862316	AKT2	5.25e-31
cg00299660	LRRC32	5.42e-31
cg20293725	GPER1	5.84e-31
cg11783834	MIR6843	6.16e-31
cg10172584	YJEFN3	6.23e-31
cg07785737	TACR2	6.43e-31
cg14424579	AGBL5-AS1	6.76e-31
cg10841756	PVRL4	6.86e-31
cg02576092	SYTL1	6.87e-31
cg13682333	RNU7-124P	7.15e-31
cg16831889	HDC	7.4e-31
cg04241844	FAM43B	8.1e-31
cg01942558	TNFAIP6	8.21e-31
cg04844995	CDK2AP1	8.39e-31
cg03016571	MIR8059	8.76e-31
cg13991834	BCL2L15	8.77e-31
cg12226635	AC026495.1	8.83e-31
cg00969405	HOXA5	8.94e-31
cg06048153	MIR1257	9.08e-31
cg11258489	RP11-46A10.5	9.34e-31
cg18221226	RP11-83B20.1	9.4e-31
cg18665384	FAM177B	9.68e-31
cg06670550	CCDC47	9.83e-31
cg14248981	STK19	9.83e-31
cg25105745	MIR197	9.88e-31
cg18476530	AP003419.11;CLCF1;CTC-1337H24.4	1.06e-30
cg06456125	RP11-479O9.3	1.08e-30
cg21973405	RNF138P1	1.15e-30
cg04694492	RP11-295D4.1	1.17e-30
cg14010550	LLNLR-284B4.1	1.21e-30
cg07862423	RNF138P1	1.22e-30
cg06603828	RPS14	1.24e-30
cg25840608	KRT8P9	1.24e-30
cg26696870	BAIAP2-AS1	1.24e-30
cg01991625	RP11-434E6.2	1.28e-30
cg05125838	UCN2	1.36e-30
cg21653641	MAMSTR	1.38e-30
cg12833018	SCGB2A2	1.43e-30
cg26333564	RP11-982M15.6	1.43e-30
cg13209298	SEMA3B	1.44e-30
cg10158280	RP11-220C2.1	1.45e-30
cg01656133	USH1C	1.51e-30
cg09533178	PPP1R12C	1.55e-30
cg13288195	FBXL22	1.59e-30
cg14448116	ADAMTS4	1.6e-30
cg25452172	CYP27B1	1.6e-30
cg22778957	MIR3195	1.63e-30
cg15110296	LOH12CR2;LOH12CR1	1.64e-30
cg19095568	C15orf62	1.69e-30
cg19618897	HELZ	1.71e-30
cg11254053	Metazoa_SRP	1.74e-30
cg19344626	NWD1	1.79e-30
cg00804078	DDO	1.83e-30
cg00102920	TPMT	1.85e-30
cg27294983	IRF9	1.86e-30
cg07392307	SFTPA2	1.86e-30
cg05705605	RP11-284F21.8	1.88e-30
cg13005636	ST6GALNAC4P1	1.97e-30
cg17557540	XXbac-BPG299F13.17	1.99e-30
cg18121224	NSD1	2.01e-30
cg03185704	LRRC61	2.05e-30
cg19853760	LGALS1	2.06e-30
cg26129339	ELF5	2.08e-30
cg16997642	HOXA5	2.09e-30
cg11135108	PBXIP1	2.13e-30
cg12899421	TUFT1;RP11-74C1.4	2.16e-30
cg13767245	SRRM3	2.21e-30
cg09139491	ST6GALNAC4P1	2.25e-30
cg06914693	RP11-341G23.4	2.37e-30
cg19112186	CPT1B	2.41e-30
cg00635560	CDK2	2.47e-30
cg16167050	RP11-261C10.4	2.63e-30
cg08284564	BCAR1	2.67e-30
cg04702509	LRRC48	2.78e-30
cg14433983	DRD4	2.97e-30
cg01761478	VWA7	2.98e-30
cg16072777	Y_RNA	3.04e-30
cg10467557	GRK6P1	3.05e-30
cg02763146	SNORD66	3.05e-30
cg08785215	FLNB	3.18e-30
cg11145461	RP11-134G8.7	3.87e-30
cg19022525	MIR5010	4.07e-30
cg19119016	IGSF11;C3orf30;RP11-484M3.5	4.19e-30
cg07478210	PQLC3	4.34e-30
cg27092248	HRH1	4.4e-30
cg16708012	TMEM119	4.45e-30
cg16451995	RP11-152P23.2;RP11-77H9.2	4.53e-30
cg02941816	MGMT	4.66e-30
cg02873525	LIG1;ZNF114	4.66e-30
cg07493760	SLC4A9	4.66e-30
cg04961553	OCIAD2	4.96e-30
cg17493885	NSD1	4.97e-30
cg03216043	MIR199A1	5.02e-30
cg24390932	SLC18A1	5.05e-30
cg00148114	RP11-1275H24.1;RP11-1275H24.3	5.09e-30
cg05050341	ENG	5.25e-30
cg05358175	CTC-248O19.1	5.4e-30
cg17074821	MIR326	5.71e-30
cg10168149	SATB2	5.83e-30
cg26404725	RP11-348J12.2;CYP26C1	5.89e-30
cg18951352	ZC3H12D	5.91e-30
cg21533216	HERC3	6.18e-30
cg27496296	MIR4740	6.25e-30
cg20817941	CTSK	6.31e-30
cg13583088	RP11-131H24.5	6.73e-30
cg20073893	TRAJ60;TRAJ59;TRAJ58	6.74e-30
cg24069262	CTD-2537I9.13	6.89e-30
cg05156901	CPT1B	6.93e-30
cg09861346	GPRIN1	7.19e-30
cg15078838	RBKS	7.32e-30
cg04081402	PES1	7.97e-30
cg13770114	RP11-252M18.3	8.07e-30
cg08966889	TRAM2-AS1	8.09e-30
cg20821276	HELZ	8.1e-30
cg13278004	SP140L	8.21e-30
cg23250540	TMPRSS3	8.66e-30
cg16027311	ATPAF1	8.85e-30
cg16861241	FOXJ1	9.07e-30
cg04618331	MIR1237	9.36e-30
cg27143082	VWA7	9.45e-30
cg15972949	YKT6	1.01e-29
cg04347059	APOC4;APOC4-APOC2	1.02e-29
cg04477431	CSNK2B;CSNK2B-LY6G5B-562	1.03e-29
cg25212453	RN7SL105P	1.04e-29
cg27151303	HOXA5	1.09e-29
cg05926640	RP11-443B7.2	1.11e-29
cg24580782	NR0B2	1.14e-29
cg08114547	Y_RNA	1.15e-29
cg04396721	2019-03-01	1.17e-29
cg18831371	GPRIN1	1.28e-29
cg26703873	UNG	1.37e-29
cg16550010	GIF	1.4e-29
cg26138144	LGALS1	1.4e-29
cg01806238	SEPT4-AS1	1.42e-29
cg03985459	ZFAND3	1.65e-29
cg00840516	HYAL2	1.66e-29
cg18919192	SCARNA11	1.67e-29
cg06806080	CD47	1.7e-29
cg00514486	CDHR4	1.71e-29
cg00332509	AC137932.5	1.71e-29
cg00872676	MIR593	1.77e-29
cg01064758	SLA	1.82e-29
cg13958495	C9orf116	1.82e-29
cg22397446	RP11-415J8.5	1.94e-29
cg12486913	CFAP45;MIR4259	1.98e-29
cg13314310	WDR35;AC079145.4	2.05e-29
cg10696787	HELZ	2.07e-29
cg14971941	LY6G5B	2.07e-29
cg02880444	RP1-41C23.2;MIR4724	2.12e-29
cg21483929	ST6GALNAC4P1	2.12e-29
cg09844257	RP11-414J4.2	2.19e-29
cg01179095	NPPA-AS1	2.31e-29
cg19593550	SNORD41	2.36e-29
cg01274753	LA16c-366D1.3	2.44e-29
cg05099221	PRR15L	2.44e-29
cg20772593	ACTBL2;AC025470.1	2.45e-29
cg08514736	CCNO;RP11-506H20.1	2.45e-29
cg07708721	SNORA38	2.46e-29
cg15934879	ZNF593	2.56e-29
cg18054578	BBC3	2.57e-29
cg22337624	DHX38	2.62e-29
cg08831077	HRH1	2.62e-29
cg22507772	RP3-470L22.1	2.63e-29
cg18597883	RP11-399K21.11;ZNF503	2.64e-29
cg20689730	MIR3618;MIR1306	2.67e-29
cg24663845	SLC41A3;ALDH1L1-AS1	2.77e-29
cg24823751	CASC10;MIR1915	2.78e-29
cg10518264	HLA-DMB	2.8e-29
cg19566586	CTC-338M12.6	2.96e-29
cg10923408	TEX26	3.03e-29
cg19582647	MIR942	3.2e-29
cg14391855	RIN1	3.26e-29
cg08378932	TM4SF4	3.3e-29
cg14089474	CBLC	3.32e-29
cg01786466	MPP4	3.52e-29
cg00026222	C1orf86;RP11-181G12.4	3.71e-29
cg22074858	GBP3	3.79e-29
cg14276379	RP11-49O14.2	3.85e-29
cg13432294	ENO1-IT1;ENO1-AS1	3.94e-29
cg11081251	RP11-325L12.7	3.98e-29
cg14493267	FAM163B	4.03e-29
cg25848158	S100A10;AL591893.1	4.04e-29
cg06528601	COTL1	4.07e-29
cg22743884	DEFB135	4.38e-29
cg25241038	PROM2	4.47e-29
cg23216745	PBXIP1	4.55e-29
cg06529761	RP11-461A8.4	4.57e-29
cg03157610	PHF1	4.64e-29
cg06560912	ZNF579	4.66e-29
cg10828599	ZNF750	4.98e-29
cg25929552	AC023115.4	5e-29
cg00185336	ABHD11	5.12e-29
cg06720467	SFN	5.26e-29
cg12990575	RP11-387M24.5;PTK7	5.35e-29
cg13047869	FANCD2OS	5.51e-29
cg05445326	TM4SF19-TCTEX1D2;TM4SF19	5.58e-29
cg23815702	RP5-966M1.6;MUSTN1	5.94e-29
cg04800788	GRAMD1B	5.98e-29
cg04329551	MIR34A	6.01e-29
cg27090289	C5orf45	6.46e-29
cg12744634	CEP85	6.56e-29
cg16788099	AP003419.11;CLCF1;CTC-1337H24.4	6.58e-29
cg25330387	CLDN16	6.71e-29
cg24702147	U47924.27;MIR200C;MIR141	7.08e-29
cg05817845	JPH2	7.09e-29
cg20294789	RP11-74C1.4	7.5e-29
cg20355301	MIR27B;MIR3074	7.56e-29
cg02704949	FXYD3	7.63e-29
cg07360805	NNAT	7.84e-29
cg01254644	MGC15885	8.04e-29
cg18775606	MIR1226	8.06e-29
cg03819243	PLCD1	8.24e-29
cg13356117	RP11-839D17.3;TTC12	8.32e-29
cg03234702	HIST1H3E	8.58e-29
cg07623567	HLA-DMB	8.84e-29
cg23047544	MIR199A1	8.98e-29
cg26164773	TIAL1	8.98e-29
cg16785213	GABARAPL2	9e-29
cg00868875	RP11-9E17.1	9.01e-29
cg20953052	MIR548F2	9.16e-29
cg25218351	TRIM54	9.41e-29
cg09999582	TMEM182	9.83e-29
cg05989861	PROM2	9.97e-29
cg22721579	RP11-268J15.5	1.02e-28
cg15845821	NWD1	1.1e-28
cg14525247	MIR219B	1.11e-28
cg07237830	GNG3	1.15e-28
cg08502159	CSNK2B	1.18e-28
cg08700454	MIR4696	1.24e-28
cg03395188	MIR26B	1.26e-28
cg19987790	CRHR1-IT1	1.28e-28
cg14201617	C2orf61	1.31e-28
cg16510654	C1orf64	1.32e-28
cg09482093	RNF112	1.33e-28
cg03888553	CRYM-AS1	1.34e-28
cg11300809	SGPP2	1.38e-28
cg03961824	NIPA2P4	1.43e-28
cg13759172	RP11-395B7.4;MUC17	1.46e-28
cg23877608	EMP3	1.49e-28
cg21542643	CYP3A43	1.54e-28
cg10533746	HMGA1P8	1.56e-28
cg09864185	SIM1	1.6e-28
cg00347757	GJB2;RP11-264J4.10	1.64e-28
cg05559808	MIR604	1.74e-28
cg05402891	TCL1B	1.76e-28
cg02254407	PLEKHB1	1.81e-28
cg12526298	LRRC48	1.85e-28
cg24120597	MIR661	1.85e-28
cg01242400	LIME1	1.89e-28
cg17159058	CLN8	1.94e-28
cg20655350	GPBAR1	1.96e-28
cg14009440	C1orf228	1.97e-28
cg09182678	CITF22-49E9.3	2e-28
cg08611376	ZFAT-AS1_1;ZFAT-AS1;ZFAT-AS1_2	2.12e-28
cg05128038	C22orf24	2.21e-28
cg03771004	NR1H4	2.29e-28
cg14550985	RIN1	2.29e-28
cg16489193	VPS52;RPS18	2.3e-28
cg17125688	RHOB	2.32e-28
cg16555388	TNFSF10	2.42e-28
cg02464665	MIR1182;RP11-423F24.3	2.46e-28
cg13065206	C15orf62	2.53e-28
cg21808045	RP11-75C10.7	2.6e-28
cg23941599	FEM1C	2.62e-28
cg10642330	NNAT	2.64e-28
cg17053854	RP11-75C10.7	2.67e-28
cg10322499	LAMTOR5	2.79e-28
cg04044418	VPS9D1	2.8e-28
cg15609272	CTC-231O11.1	2.85e-28
cg27367878	MIR99B;MIRLET7E;MIR125A;SPACA6P	2.89e-28
cg15177359	UNC13D	2.91e-28
cg14604475	MIR4479	2.94e-28
cg12147994	ACP1	2.98e-28
cg00492070	CD47	3e-28
cg15664905	PHLDB3	3.07e-28
cg20249566	NWD1	3.13e-28
cg09365533	TIMM13	3.17e-28
cg21090033	TM4SF19-TCTEX1D2;TM4SF19	3.18e-28
cg23256150	NR1H4	3.31e-28
cg12622519	ADPRHL1	3.51e-28
cg22129545	UCN	3.6e-28
cg23068797	MIR199A1	3.6e-28
cg04292941	DNHD1	3.66e-28
cg13793048	RP11-296A16.1;SERINC4	3.69e-28
cg14019757	RP11-293K20.3	3.83e-28
cg19824441	GPR182	4.04e-28
cg00774375	CTD-3193O13.8	4.09e-28
cg21909751	RP11-1260E13.1	4.13e-28
cg27091343	TRIM10;TRIM15	4.29e-28
cg04063235	MIRLET7A3;MIR4763;MIRLET7B	4.29e-28
cg08843513	TMEM43	4.29e-28
cg02059082	ZNF513	4.45e-28
cg05334554	RP5-875O13.1	4.48e-28
cg26762050	CES4A	4.62e-28
cg03363565	LA16c-359F1.1;RAB11FIP3	4.64e-28
cg03265671	RP11-284F21.10	4.68e-28
cg20817131	HOXA5	5.27e-28
cg02722214	PHACTR2P1	5.28e-28
cg26429629	LINC01366	5.29e-28
cg02845534	WDR46	5.62e-28
cg10192196	PSMB8	5.83e-28
cg15740492	DPF3	5.92e-28
cg04263215	ADAMTS4	5.98e-28
cg07224067	RSAD1	6.03e-28
cg18514820	VIM-AS1	6.04e-28
cg02974976	NAP1L4P1	6.27e-28
cg11170044	LINC01250	6.29e-28
cg11717738	Y_RNA	6.32e-28
cg18116902	RP11-475O6.1	6.33e-28
cg17993296	FAM83G	6.36e-28
cg21115769	ODF3L1	6.44e-28
cg09495207	LCAT	6.5e-28
cg01883759	JAZF1	6.55e-28
cg10859192	ATP5G2	6.88e-28
cg22532194	RP11-196B3.3	6.98e-28
cg12728032	ELF5	7.11e-28
cg03445310	KRT9	7.12e-28
cg10900663	RP3-449M8.6	7.15e-28
cg02026535	ZNF358	7.41e-28
cg07306253	C15orf62	7.59e-28
cg07380095	PLEKHG1;RP11-136K14.1	7.62e-28
cg13568258	EMP3	7.76e-28
cg26884581	PYGM	7.76e-28
cg19784428	NWD1	7.78e-28
cg09069579	FAM163B	7.9e-28
cg21918786	PTCHD3P3	7.99e-28
cg05131488	ETV1	8.05e-28
cg16784745	MIR148B	8.18e-28
cg03383434	EXD3	8.27e-28
cg00119314	RSAD1	8.51e-28
cg16236270	AP4M1	8.75e-28
cg06432061	AL023284.1	8.9e-28
cg21690505	RP11-396C23.3	9.06e-28
cg06375148	C1orf74	9.23e-28
cg18886062	MAMSTR	9.35e-28
cg09158821	RN7SL105P	9.36e-28
cg06433467	CTC-537E7.3	9.36e-28
cg08836542	FLJ31356;RP11-373D23.2	9.65e-28
cg25722178	RP11-148B6.1;MIR302B	1.15e-27
cg10108468	AC103563.9	1.15e-27
cg02340018	LINC01158;RP11-13J10.1	1.15e-27
cg06524377	RP11-20G13.1	1.15e-27
cg18454133	EFS	1.17e-27
cg09802818	C12orf80;LINC00592	1.2e-27
cg22951027	KLHL33	1.22e-27
cg18680181	RP11-173D9.5	1.23e-27
cg24993400	RP3-402G11.27	1.24e-27
cg27329371	ALDH3A1	1.24e-27
cg10583651	IL21-AS1	1.27e-27
cg14413466	RP11-455O6.2	1.28e-27
cg24065807	TRAJ32;TRAJ31	1.3e-27
cg17453840	CPEB1	1.32e-27
cg17009836	CGB;NTF6A	1.32e-27
cg22272492	SLC22A18AS	1.34e-27
cg14849140	RP11-438N5.2	1.34e-27
cg00812246	BSND	1.37e-27
cg00351537	ZNF358	1.43e-27
cg00632070	TEX26	1.48e-27
cg11448683	TCTEX1D4;BTBD19	1.5e-27
cg03322057	DNM3OS;MIR199A2	1.51e-27
cg13148085	HELZ	1.52e-27
cg09182138	RP11-284F21.9	1.52e-27
cg09467345	MYLK2	1.54e-27
cg12200478	SLC39A2	1.55e-27
cg14434109	RP11-374P20.4	1.56e-27
cg26298855	AL139239.1	1.57e-27
cg16604086	SDSL	1.62e-27
cg07316846	AC018730.4	1.67e-27
cg26939375	RP11-460N20.4	1.68e-27
cg21475402	RP11-284F21.9	1.69e-27
cg26904406	TRAF3IP2	1.7e-27
cg16616769	IQCK	1.72e-27
cg12173181	RNF128	1.75e-27
cg26233914	ITGAX	1.82e-27
cg05725531	RP1-8B1.4;ENPP4	1.86e-27
cg27448161	SPRYD3	1.89e-27
cg19805160	CFAP45;MIR4259	1.9e-27
cg01535726	RP11-1E4.1;MSRA	1.91e-27
cg26745143	CHRNA10	2e-27
cg21724796	AURKB	2.1e-27
cg22686523	RP11-192H23.4;SGK494	2.1e-27
cg06141025	GYS2	2.19e-27
cg25518400	C6orf141	2.2e-27
cg24065328	VWA7	2.21e-27
cg12149609	JPH2	2.29e-27
cg13616930	ZNF750	2.31e-27
cg20336809	ATP4B	2.4e-27
cg02907064	MIR199A1	2.42e-27
cg23829395	RP11-474P2.7	2.42e-27
cg23394462	RP5-1092A3.5	2.42e-27
cg17918937	AC100830.3	2.45e-27
cg16963138	MARCH10;RP11-453A12.1	2.47e-27
cg03840351	CTD-2083E4.5	2.5e-27
cg17552801	ANKRD2	2.55e-27
cg05598919	NACAD	2.64e-27
cg11235583	CLCNKB	2.64e-27
cg26687173	WDR88	2.71e-27
cg18084554	AC005391.2	2.71e-27
cg23629183	MINA	2.89e-27
cg08890627	CYCSP40	3.21e-27
cg04880751	KMO	3.25e-27
cg15484375	SAA1;RNA5SP334	3.31e-27
cg05597748	FAM41C	3.35e-27
cg13643585	HOXB9	3.47e-27
cg07728579	FSD2	3.57e-27
cg04528771	TP53I13	3.72e-27
cg11569933	CSNK2B;CSNK2B-LY6G5B-562	3.78e-27
cg24004007	FBXL22	3.82e-27
cg09577228	GABRR2	3.84e-27
cg25316172	CTC-248O19.1	3.86e-27
cg25630380	NTRK1	3.87e-27
cg09329516	RN7SL105P	3.91e-27
cg27411547	RP11-10J21.5	3.91e-27
cg15069235	RP3-399L15.3	4.04e-27
cg15839431	YJEFN3	4.1e-27
cg09561125	NRCAM	4.18e-27
cg13664588	SNORD1B;SNORD1A	4.19e-27
cg04002454	SP140L	4.24e-27
cg00691625	NR5A1	4.33e-27
cg07922924	RNU6-537P	4.44e-27
cg11945905	LINC00176	4.48e-27
cg14798641	C3orf62	4.66e-27
cg05657792	RP11-589P10.5;ALOX12	4.73e-27
cg06754197	MIR199A1	4.84e-27
cg00174179	RHOA	5.13e-27
cg08840665	TMEM88	5.16e-27
cg07281370	MIR125B1	5.19e-27
cg15755507	RP11-655M14.13	5.34e-27
cg07809909	FOXS1	5.44e-27
cg24843609	BGLAP	5.66e-27
cg07288447	TCF23	5.72e-27
cg02927519	TUFT1;RP11-74C1.4	5.76e-27
cg06641366	LRRC8C;RP11-302M6.4	5.88e-27
cg11200136	HILS1	5.88e-27
cg02698576	RP11-68I18.10	6.08e-27
cg07628580	RP3-434P1.6	6.17e-27
cg06166785	G6PC	6.22e-27
cg21962603	TUBA1A	6.22e-27
cg02625138	LINC00703	6.27e-27
cg01881322	RP13-476E20.1	6.29e-27
cg25781123	SRGAP3;RP11-380O24.1;THUMPD3	6.3e-27
cg14186336	RP11-477J21.6	6.4e-27
cg00965643	DCDC2B	6.41e-27
cg18222371	MIR3671;MIR101-1	6.54e-27
cg26548101	LINC00493;DTD1	6.8e-27
cg00114710	TDRD10	6.83e-27
cg08868601	RP4-713A8.1	7.16e-27
cg06299284	DRD4	7.19e-27
cg01008680	RP3-333H23.8	7.19e-27
cg03721994	RNU6-9	7.21e-27
cg07470694	RP11-2C7.1	7.31e-27
cg19324627	APOA1	7.38e-27
cg03337886	RP11-40E6.1	7.61e-27
cg14035368	DNLZ	7.83e-27
cg26665274	BMP2	7.95e-27
cg05346831	MIR614	8.01e-27
cg06912964	KHSRP	8.06e-27
cg07600533	KLHDC7B	8.22e-27
cg00034559	TMEM178A	8.55e-27
cg22222281	CD9	9.08e-27
cg26076854	OLFML1	9.11e-27
cg01842837	RP11-83B20.5	9.55e-27
cg03845745	RP11-483A20.3	9.7e-27
cg24603926	MIR1178	9.79e-27
cg01790577	FAM66B	9.88e-27
cg09339818	SIM1	1.02e-26
cg25432738	MIR4499	1.02e-26
cg05226729	DEFB135	1.03e-26
cg06066676	RP11-2C7.1	1.04e-26
cg11034619	FRMPD2	1.07e-26
cg11600734	EGOT	1.1e-26
cg00131705	PIGQ;NHLRC4	1.12e-26
cg16937168	SNED1	1.15e-26
cg05801374	PNRC2	1.16e-26
cg00088042	PPRC1	1.17e-26
cg22249529	KLHDC7B	1.19e-26
cg09244872	NR1H4	1.22e-26
cg03265268	DEFB135	1.25e-26
cg15921228	RP11-923I11.5	1.28e-26
cg25600472	RN7SL68P;AC008781.1	1.32e-26
cg11741201	FJX1	1.34e-26
cg17408291	CTD-2561B21.3	1.36e-26
cg12113132	RP11-473C18.3;CCNDBP1	1.37e-26
cg05996789	SLC25A4	1.38e-26
cg10533331	RASGRP1	1.4e-26
cg11344927	AC006538.4;SLC39A3	1.42e-26
cg15976636	PACRG	1.43e-26
cg01178601	Y_RNA	1.48e-26
cg08730245	NPFF	1.48e-26
cg06523224	BNC1	1.52e-26
cg09704159	MYEF2	1.53e-26
cg08721491	STK19	1.55e-26
cg10634273	UOX;DNASE2B	1.55e-26
cg00792251	CAPN2	1.58e-26
cg13841476	DGCR11	1.59e-26
cg11620409	MYRF	1.71e-26
cg27007110	XXbac-BPG252P9.9	1.73e-26
cg17928152	RP11-120K24.4;RP11-120K24.5	1.75e-26
cg11037477	AC019131.1	1.79e-26
cg08802933	VIL1	1.8e-26
cg21245816	ANXA2R	1.9e-26
cg20127859	MROH6	1.96e-26
cg05917988	AARS2	2.07e-26
cg07492143	ACD	2.1e-26
cg03334213	C4orf26	2.11e-26
cg11076668	AC026956.1	2.18e-26
cg21243846	ADPRHL1	2.27e-26
cg02891048	Y_RNA	2.38e-26
cg13723983	C9orf50	2.39e-26
cg23316449	PAPLN	2.41e-26
cg02951514	SLA	2.46e-26
cg04837071	EXD3	2.47e-26
cg13992911	RP11-43F13.4	2.48e-26
cg05878390	MAB21L2	2.51e-26
cg14598764	SLC41A3;ALDH1L1-AS1	2.53e-26
cg03010301	MIR99B;MIRLET7E;MIR125A;SPACA6P	2.59e-26
cg15326452	TCF23	2.61e-26
cg14099345	MIR6855	2.62e-26
cg25544164	NRTN	2.7e-26
cg05795849	EGOT	2.75e-26
cg25985347	PALLD	2.76e-26
cg13594711	SSC4D	2.77e-26
cg05817709	RARRES3	2.79e-26
cg24195524	AGPAT1;MIR6833	3.02e-26
cg06988349	ATOH7	3.05e-26
cg10496762	RP11-77H9.2	3.1e-26
cg25742326	PLEKHN1	3.1e-26
cg07807165	RP11-475O6.1	3.1e-26
cg17003376	ZNF202	3.12e-26
cg06574296	ESPNL	3.15e-26
cg12256038	PRKAR1B	3.22e-26
cg02382532	C6orf132	3.33e-26
cg18156845	MIR744	3.37e-26
cg10375110	CHRNA9	3.54e-26
cg02415963	RNA5SP410;5S_rRNA;5S_rRNA;RNA5SP413	3.71e-26
cg23311800	ELF5	3.73e-26
cg27500784	XXbac-BPG252P9.9	3.76e-26
cg06210630	ATP1A2	3.91e-26
cg08711067	SLC37A3;RAB19	3.96e-26
cg15854125	RBPMS	3.99e-26
cg19600670	CDC73	3.98e-26
cg24335984	HYAL2	4.07e-26
cg03574652	RP11-560F18.1	4.07e-26
cg04639931	WDR46;MIR6834	4.07e-26
cg13026370	RP11-789C17.3	4.23e-26
cg25564800	KPNA1	4.24e-26
cg10094907	MIR25;MIR93;MIR106B	4.34e-26
cg27281285	CIT	4.52e-26
cg14160518	SALL4	4.55e-26
cg20579480	APOBEC4	4.57e-26
cg24681408	MAFG	4.58e-26
cg19402371	CTD-2105E13.15	4.8e-26
cg26051755	RP11-363D14.1	4.83e-26
cg02466544	AC005041.11	4.88e-26
cg09555736	LA16c-359F1.1;RAB11FIP3	4.89e-26
cg17736772	HCN3	4.89e-26
cg17390562	EZR-AS1	4.91e-26
cg26726370	LY6G5B	4.94e-26
cg01447828	PRX	4.95e-26
cg00310463	KY	5.1e-26
cg06312651	Y_RNA	5.18e-26
cg17565967	RBBP8NL;RP5-908M14.5	5.28e-26
cg15132169	ZC3H12D	5.37e-26
cg20869844	RAB19	5.38e-26
cg12096759	SNHG10	5.41e-26
cg13905199	RP11-35N6.1	5.42e-26
cg04628320	TBCB;AD001527.4	5.53e-26
cg14463912	SFXN3	5.53e-26
cg00711496	ADM5	5.73e-26
cg05275605	COL18A1-AS1	5.82e-26
cg18234606	CTD-2033D15.3	6.08e-26
cg06682763	AP000580.1	6.16e-26
cg02086742	MIR4745	6.17e-26
cg06651452	CTD-2622I13.3	6.33e-26
cg07039975	RP11-287D1.3	6.41e-26
cg00624410	RP11-407G23.1	6.63e-26
cg07535740	AC104532.4	6.91e-26
cg05389024	KLHL41	6.97e-26
cg00290373	CCNB1	7.21e-26
cg04895895	C1orf198	7.22e-26
cg08364093	RBKS	7.27e-26
cg09678939	ZC3H12D	7.41e-26
cg02537838	RBBP8NL;RP5-908M14.5	7.46e-26
cg03237166	ALDH1B1	7.76e-26
cg11420633	KRTAP3-3	7.81e-26
cg03440386	TRBV3-1	8e-26
cg26910384	MIR200A;MIR429;RP11-465B22.8	8.07e-26
cg20446334	BAIAP2-AS1	8.28e-26
cg04743654	RASSF1;ZMYND10-AS1	8.47e-26
cg13008631	RP11-395N3.2	8.61e-26
cg21330577	XXbac-BPG252P9.9	8.77e-26
cg26796069	KIAA1875	8.81e-26
cg26600753	CTC-338M12.6	9.37e-26
cg11418783	LAD1	9.53e-26
cg19986876	RP11-708J19.1	9.65e-26
cg20698253	CTB-60B18.17;CGB5	9.66e-26
cg21853021	SLC22A18	9.7e-26
cg09861838	RP11-108M9.3	9.84e-26
cg14739664	SLC25A2	9.99e-26
cg20413392	MIR219B	1.05e-25
cg25597366	RP11-218E20.2	1.05e-25
cg00234370	NCDN	1.08e-25
cg09307742	PITPNM2	1.12e-25
cg26919387	RN7SL614P	1.13e-25
cg15355387	CADM2	1.14e-25
cg04088474	RP11-122C5.2	1.2e-25
cg07823755	UGT1A1	1.22e-25
cg15922080	RNA5SP206	1.24e-25
cg10597322	SLC25A29;MIR345	1.28e-25
cg05063632	COL4A2-AS1	1.28e-25
cg20091689	ANKRD23;ANKRD39	1.3e-25
cg26453588	BIK	1.32e-25
cg16749093	SIPA1	1.34e-25
cg17887685	TCEB3B	1.35e-25
cg02245810	CPT1B	1.39e-25
cg13691247	ATP5G2	1.42e-25
cg02626307	TSACC	1.43e-25
cg12488274	PARP16;RP11-349G13.2	1.43e-25
cg19542849	AC093373.1	1.51e-25
cg15318861	APOL6	1.53e-25
cg27574980	VWA7	1.54e-25
cg23464041	MIR3934	1.58e-25
cg26534677	CCDC25;RNU6-1276P	1.63e-25
cg19291355	AARS2	1.64e-25
cg01729523	AC005523.3	1.65e-25
cg26819160	CD81	1.65e-25
cg23743428	GRK6P1	1.66e-25
cg20817822	MIR29B2	1.72e-25
cg18221429	LRRC61	1.74e-25
cg08642081	CTD-2530H12.4	1.75e-25
cg13317079	CCDC150	1.76e-25
cg17383811	PRRT1	1.77e-25
cg26881535	AURKAPS1	1.79e-25
cg26133068	KB-1125A3.11;SLC2A11	1.86e-25
cg08602528	RP11-295D4.1	1.87e-25
cg07669260	RNU2-63P	1.96e-25
cg09634469	SERPIND1	2.01e-25
cg16343134	RP3-406A7.7	2.08e-25
cg16014770	AMN1;RP11-467L13.7	2.1e-25
cg08568550	C11orf16	2.1e-25
cg02968407	AC074389.5	2.11e-25
cg24663003	SSC4D	2.11e-25
cg16225405	AP003419.11;CLCF1;CTC-1337H24.4	2.13e-25
cg21554552	RASSF1;ZMYND10-AS1	2.19e-25
cg27285599	ZNF750	2.23e-25
cg01850889	AC079776.1	2.26e-25
cg06905511	CTB-35F21.1	2.28e-25
cg16027267	TCAP	2.31e-25
cg10635061	FHL2	2.38e-25
cg06473363	CSNK2B;CSNK2B-LY6G5B-562	2.43e-25
cg20442289	C5orf15	2.48e-25
cg26419584	RPL23;RPS20P35	2.49e-25
cg19468528	SMIM6	2.54e-25
cg00103299	CTD-2313J17.7	2.56e-25
cg25145360	ALDH3A1	2.57e-25
cg06972903	PLEKHG5	2.59e-25
cg13568415	MIR4648	2.64e-25
cg08946332	RP11-589P10.5	2.68e-25
cg03489712	ZYX	2.69e-25
cg04403474	CTB-60B18.17;CGB5	2.74e-25
cg10531073	CTA-228A9.3	2.87e-25
cg00715050	CTB-39G8.3	2.87e-25
cg25952964	EDAR	2.9e-25
cg23205676	ESPNP	2.9e-25
cg01699740	GRAMD1B	2.93e-25
cg11697038	AHDC1	3.01e-25
cg18025409	RP5-892F13.2	3.14e-25
cg06839111	LCAT	3.25e-25
cg17276682	SLC25A5	3.37e-25
cg15126733	LMNTD2	3.38e-25
cg08709576	RXFP3	3.46e-25
cg05982160	LINC01565	3.51e-25
cg00063535	MIR6762	3.52e-25
cg17108629	RAB38;MIR3166	3.53e-25
cg04488758	USP44;PGAM1P5	3.55e-25
cg10012623	RAB15	3.59e-25
cg22137471	RHOQ	3.93e-25
cg07668993	SLPI	3.95e-25
cg03244974	RP11-968O1.5	4.09e-25
cg14187895	ERBB2	4.13e-25
cg23817637	CLRN3	4.19e-25
cg14158583	PVRL4	4.28e-25
cg07112173	GGT8P	4.36e-25
cg16425038	REC8	4.41e-25
cg15745401	P2RY6	4.58e-25
cg04329454	LINC00336	4.98e-25
cg19301960	CIRBP-AS1	5e-25
cg04100971	IL18	5.03e-25
cg04837533	ITPR2	5.39e-25
cg16354688	CLCNKB	5.46e-25
cg02518775	RP11-867G23.3;RP11-867G23.4	5.78e-25
cg13475583	RP11-443B7.3	5.78e-25
cg02912790	APOC4;APOC4-APOC2	5.79e-25
cg06569729	SFRP5	5.91e-25
cg27560561	AC018730.4	6e-25
cg14339750	RP5-1157M23.2	6.05e-25
cg24629392	SNORA71A	6.11e-25
cg13235717	SFN	6.16e-25
cg05958438	ERMP1	6.19e-25
cg07120097	RP11-81F13.1	6.21e-25
cg00244517	ARL9	6.34e-25
cg22221831	MGP	6.36e-25
cg14075731	CD300LB	6.36e-25
cg03419151	XAF1	6.41e-25
cg15421321	MIR6765	6.54e-25
cg21142272	EXOC3L1;E2F4	6.54e-25
cg05535398	CTD-2035E11.4	6.63e-25
cg24483493	TPM1	6.67e-25
cg20645040	RP4-569M23.5	6.68e-25
cg22969079	MIR326	7.51e-25
cg14848772	HIST1H2AG	7.75e-25
cg09575756	ECSCR;ECSCR	7.82e-25
cg00589850	RN7SL68P;AC008781.1	7.83e-25
cg07011373	GOLT1A	7.86e-25
cg15819955	RP4-738P11.3	8.26e-25
cg02578944	NKAPL	8.42e-25
cg20749510	RP4-583P15.10	8.43e-25
cg26006084	STK10	8.5e-25
cg10630085	RP11-809N8.2	8.6e-25
cg02106682	HOXA5	9.08e-25
cg07815521	MIR641	9.15e-25
cg19506623	MIR4785	9.25e-25
cg07156824	RP1-267D11.6	9.25e-25
cg14701108	LINC01250	9.36e-25
cg14198860	SNORD37	9.5e-25
cg23278196	ATP5G2	9.5e-25
cg02130027	RP11-385F7.1;CD2AP	9.53e-25
cg11239575	ITGAE	9.62e-25
cg00095214	C1orf122	9.69e-25
cg15862706	KRT19P2;MIR492	9.69e-25
cg24164786	CTD-2207P18.1	1e-24
cg05005343	MIR125B1	1.02e-24
cg03127558	MAMSTR	1.04e-24
cg01883046	RP11-394I13.1	1.05e-24
cg17007693	RP11-703I16.3	1.06e-24
cg04470557	P4HA2	1.13e-24
cg10789749	ZCCHC3	1.19e-24
cg23435915	ANXA2R	1.2e-24
cg25484790	MIR6756	1.28e-24
cg26075356	LRCH1	1.28e-24
cg10770023	CPT1B	1.31e-24
cg19704074	ANGPTL3	1.37e-24
cg08836954	MGAT4B	1.4e-24
cg14183013	ZMYND8	1.42e-24
cg13585586	ALDOB	1.43e-24
cg14188840	HOXA10-HOXA9;HOXA10	1.45e-24
cg11009596	AURKB	1.45e-24
cg00576936	MIR4311	1.46e-24
cg06678772	PPP1R14D	1.49e-24
cg21111812	CTD-2525I3.2	1.5e-24
cg15957004	SPDYC	1.51e-24
cg16264705	ATP5G2	1.54e-24
cg00532477	SMPD4;AC018804.1	1.56e-24
cg24670552	RP11-40E6.1	1.56e-24
cg14505741	SPON2;CTBP1-AS	1.57e-24
cg11076954	RN7SL105P	1.57e-24
cg22911831	CTD-2659N19.4	1.59e-24
cg13309012	MIR155	1.59e-24
cg22653915	PXDNL	1.59e-24
cg17022727	MIR25;MIR93;MIR106B	1.61e-24
cg00682096	HOXB5	1.64e-24
cg24982541	CTC-506B8.1	1.66e-24
cg09026253	IFITM1	1.67e-24
cg14100211	SENP8	1.68e-24
cg20938346	RP1-121G13.2	1.68e-24
cg21970626	GRK6P1	1.7e-24
cg19565262	NAT8	1.72e-24
cg10409560	C4orf26	1.89e-24
cg06994787	RP11-490O6.2	1.9e-24
cg15299978	COLCA1	1.94e-24
cg05363955	MIR4439	1.95e-24
cg15033552	CAPN2	1.95e-24
cg14836636	RP11-768F21.1	1.96e-24
cg25270670	FTH1	1.97e-24
cg12926357	TRIM54	2.02e-24
cg11222672	RP11-789C17.3	2.05e-24
cg06722630	RP11-395B7.4;MUC17	2.09e-24
cg26306869	S100A4;S100A3	2.16e-24
cg24921186	ANXA2R	2.16e-24
cg01610165	RP11-436H11.5	2.22e-24
cg05083414	FAM193A	2.22e-24
cg14859417	PTPRE	2.29e-24
cg17043651	DDX18P5	2.31e-24
cg07838048	MTSS1L	2.34e-24
cg06239352	SRCIN1	2.37e-24
cg21912938	JAZF1	2.52e-24
cg03389701	DLEU7	2.52e-24
cg01381586	SNORA80B;RP11-320M2.1	2.66e-24
cg19901403	STAU2-AS1	2.66e-24
cg03455990	RP11-90J7.2	2.73e-24
cg00061039	F11	2.74e-24
cg00079388	DPRXP1	2.91e-24
cg23504246	FGF7	3.01e-24
cg04914996	RTP1	3.04e-24
cg10043155	RP11-191A15.4	3.12e-24
cg06014227	RPL13AP20	3.21e-24
cg23690166	HOXB7;MIR196A1	3.21e-24
cg01279219	FAM72A	3.29e-24
cg14312921	RP11-443B9.1	3.29e-24
cg22727124	MESP2	3.3e-24
cg03166324	PVRL4	3.31e-24
cg06112894	TRAPPC9	3.33e-24
cg01983504	MIR103A2	3.36e-24
cg11117099	MAP3K14-AS1	3.43e-24
cg08591265	RP11-159D12.5;RP11-159D12.6	3.46e-24
cg13974464	MAMSTR	3.49e-24
cg05673137	UNC5CL	3.54e-24
cg13507706	ZGLP1	3.55e-24
cg09664492	PROM2	3.61e-24
cg03873930	ARFRP1;RP4-583P15.15	3.61e-24
cg07266350	AMT	3.71e-24
cg06561366	IL23A	3.76e-24
cg06051411	ATP5H	3.98e-24
cg11643442	SNORA38	4.01e-24
cg25858249	PLEKHG1;RP11-136K14.1	4.04e-24
cg12390011	RAB19	4.05e-24
cg07390924	PLEKHN1	4.06e-24
cg19913626	RP11-567J20.1;RP11-770E5.3	4.07e-24
cg07048519	CDRT1	4.2e-24
cg12713445	FAM195B;PPP1R27	4.25e-24
cg10404717	MIR219B	4.3e-24
cg07251887	SMIM6	4.45e-24
cg01081346	CPT1B	4.51e-24
cg00774088	RP11-2C7.1	4.62e-24
cg21164303	TMED3	4.62e-24
cg25220537	C15orf26	4.69e-24
cg27040708	CGB8;CTB-60B18.15	4.95e-24
cg04581938	XXbac-BPG181B23.7	4.98e-24
cg00038736	SPRED3	5.21e-24
cg02090805	PXDNL	5.37e-24
cg00267286	C1QL3	5.4e-24
cg05302531	MIR4285	5.5e-24
cg12167564	LYST	5.52e-24
cg25319992	AC018738.2	5.69e-24
cg04706667	PTGIR	6.17e-24
cg18372620	DCUN1D5	6.18e-24
cg01792666	RP11-146F11.1	6.22e-24
cg26957471	AC137932.5	6.46e-24
cg07751764	SLC22A9	6.54e-24
cg09790829	BACH2	6.65e-24
cg05091734	BX322557.10	6.72e-24
cg25418852	SCGB1B2P	6.77e-24
cg08313491	RPL13AP3	6.82e-24
cg17124224	BNC1	7.01e-24
cg23886355	RP11-120K24.4;RP11-120K24.5	7.07e-24
cg04573398	CCDC81	7.14e-24
cg14562054	RIN1	7.26e-24
cg18114463	TMEM240	7.68e-24
cg21757951	RP11-326C3.13;RP11-326C3.12	7.71e-24
cg18147296	FAM41C	7.77e-24
cg07083818	KIAA1683	7.99e-24
cg19870626	RP11-318C24.2;RP11-318C24.1	8.01e-24
cg16792312	SRRM2	8.03e-24
cg04124457	PRTG	8.03e-24
cg21874193	TAS2R19	8.09e-24
cg08941515	LA16c-390H2.1	8.14e-24
cg03207391	MIR3189	8.22e-24
cg20322093	AC087651.1;OTOP3	8.32e-24
cg26063719	VIM-AS1	8.37e-24
cg02130107	CTD-2574D22.6	8.56e-24
cg20485781	RP11-894P9.2	8.57e-24
cg16579438	THRB	8.62e-24
cg09535963	C6orf25	8.7e-24
cg10277175	ANKRD23;ANKRD39	8.87e-24
cg22298860	HLA-F	8.9e-24
cg21752601	UCN	9e-24
cg07042546	PCSK7	9.06e-24
cg06427759	COMMD10	9.06e-24
cg10047173	ART4	9.44e-24
cg22361106	AL138837.1	9.5e-24
cg14609407	SLPI	9.5e-24
cg06056514	Y_RNA	9.74e-24
cg24024424	RN7SL68P;AC008781.1	9.75e-24
cg02455346	HLX-AS1	9.87e-24
cg13011452	C6orf136	1.03e-23
[truncated: 60,385 more rows]

## Sheet: LIHC
probe	gene	adj.P.Val
cg27143049	PSMA1;PDE3B	4.24e-72
cg25564800	KPNA1	8.88e-71
cg23679141	ANP32C	3.92e-69
cg18476530	AP003419.11;CLCF1;CTC-1337H24.4	1.29e-68
cg14096180	AP003419.11;CLCF1;CTC-1337H24.4	2.92e-65
cg26435670	BMPR1A	5.88e-64
cg25641145	ANKRD46	1.12e-59
cg27120934	BMPR1APS1	1.36e-58
cg24318537	MIR4700	1.4e-58
cg25792518	CHAD	2.65e-58
cg24132580	ANP32C	6.91e-58
cg18529294	PTRHD1	1.25e-57
cg10569694	RNF216P1	3.29e-57
cg26914705	C22orf24	4.2e-57
cg11009596	AURKB	4.99e-57
cg11374834	MIR4444-2;HNRNPA3P6	5.88e-57
cg15364131	C22orf24	6.97e-57
cg03956606	ANGPTL7	1.09e-54
cg05133853	HBBP1	1.43e-54
cg00459078	KIF18B;CTD-2534I21.8	1.94e-54
cg00298977	LELP1	1.96e-52
cg22816294	TRAV16	4.83e-52
cg00891995	SPRR2C	7.38e-52
cg24304714	LCE1C	1.29e-51
cg04604142	LUC7L3	3.11e-51
cg12134633	SCG5	8.2e-51
cg11398299	GLRXP3	1.08e-50
cg13037245	AP003419.11;CLCF1;CTC-1337H24.4	1.18e-50
cg25856811	SPRR3	2.7e-50
cg16222581	RP11-449P15.2	3.66e-50
cg08566455	RHOQP3	2.03e-49
cg24938956	MYDGF	7.93e-49
cg23672425	ANGPTL7	8.38e-49
cg27269561	THOC6	1.52e-48
cg04508649	ANGPTL7	3.31e-48
cg11912215	TPO	1.27e-47
cg02650767	OR2B11	1.39e-47
cg07804289	SPRR2C	2.45e-47
cg05946971	C22orf24	3.46e-47
cg26720452	LINC00968	5.06e-47
cg07143815	LINC01299	5.78e-47
cg05053327	CCR10	5.78e-47
cg23654174	STIL	1.76e-46
cg05660005	RBM8A;CH17-270A2.2	2.49e-46
cg25631489	PHC3	3.42e-46
cg10469791	GRXCR1	4.96e-46
cg00413849	MPC2	5.48e-46
cg18766755	SPRR2A	6.62e-46
cg25612480	UBE2V2	2.23e-45
cg26312920	NEUROD6	9.67e-45
cg20323571	MIR488	9.87e-45
cg02291365	IRX1P1	1.53e-44
cg27620946	RP11-589C21.5	2.11e-44
cg11267802	SPRR2G	3.48e-44
cg01950958	NUDT17	3.53e-44
cg06353345	OR51B4	5.82e-44
cg20465661	OR2T6	6.5e-44
cg05910415	IGFL1	1.19e-43
cg26151206	OR10K2	1.26e-43
cg16199859	MIR4444-2;HNRNPA3P6	1.54e-43
cg20312687	DEFB118	1.77e-43
cg25480799	CACYBPP2	2.01e-43
cg05020510	NOV	2.93e-43
cg18816826	MT1HL1	3.25e-43
cg02226239	CYP11B2	4.11e-43
cg01925883	TCHHL1	4.97e-43
cg04923174	OR10X1;OR10X1	6.59e-43
cg03872376	ZP4	1.02e-42
cg17015994	CYP11B1	1.46e-42
cg13481969	RP11-535M15.1	1.46e-42
cg02567289	RP11-978I15.10	3.55e-42
cg26775866	SLU7;PTTG1	4.05e-42
cg15686949	SUB1	4.77e-42
cg08906442	LINC01341	5.07e-42
cg14188840	HOXA10-HOXA9;HOXA10	5.49e-42
cg10132208	ZSCAN1	9.6e-42
cg14220224	SDR16C6P	1.04e-41
cg21919599	NLRP3	1.3e-41
cg24082983	KRTAP13-4	1.32e-41
cg08948808	SPRR4	1.47e-41
cg12033297	MIR488	1.82e-41
cg15202552	FCRL3	2.31e-41
cg16657538	RP11-158H5.8	5.1e-41
cg07648740	HTR5A-AS1	5.37e-41
cg04874562	OR51I1	5.67e-41
cg09340639	FCRL1	5.84e-41
cg11324259	CYP11B2	6.92e-41
cg12624087	C22orf24	8.78e-41
cg21332500	RP1-170O19.14	9.06e-41
cg16522370	TGIF2LX	9.53e-41
cg22794244	OR10G9	1.03e-40
cg23857976	VEZF1;RP11-159D12.3	1.88e-40
cg15300436	MYT1L-AS1	1.98e-40
cg25082710	IVL	2.45e-40
cg19901940	TRAV35	2.83e-40
cg17134153	FCRL3	3.58e-40
cg20812354	OR2M2	3.8e-40
cg00666640	OR2T12	4.17e-40
cg12445786	RP11-320A16.1	5.07e-40
cg04574507	CD1B	5.55e-40
cg23288563	MIR6717;TPPP2;AL161668.5	5.55e-40
cg08918985	TCHHL1	5.98e-40
cg04103514	EMR2	6.08e-40
cg15231462	OR2G3	8.19e-40
cg09305680	UTP23	8.24e-40
cg23873941	LTB4R2	8.51e-40
cg27080119	RP11-679C8.2	9.36e-40
cg18057469	XXbac-BPG300A18.13	1.12e-39
cg26505663	POLR2M	1.16e-39
cg20038038	AC245036.1	1.18e-39
cg23919924	OR10G8	1.3e-39
cg20867746	OR51S1	1.77e-39
cg13444135	KIR2DL4	1.84e-39
cg27534912	CD1C	1.86e-39
cg13762704	AC245036.1	1.86e-39
cg02638567	AC079398.2	2.5e-39
cg06393354	OR2M3	2.54e-39
cg15059851	IVL	3.16e-39
cg05416055	CYP11B1	3.83e-39
cg25188398	RP11-452N4.1	4.42e-39
cg27496793	SOCS5	4.5e-39
cg14231297	ZSCAN18	5.66e-39
cg10804656	RP11-573G6.8	5.7e-39
cg26066361	CLEC7A	6.11e-39
cg13401840	SPRR2C	6.65e-39
cg19127840	MIR223	9.2e-39
cg23520574	OR51A7	1.01e-38
cg06546469	AC018685.2	1.31e-38
cg18267049	TPM4P1	1.35e-38
cg10006428	OR2T27	1.44e-38
cg08886154	PAX4	1.51e-38
cg00876196	KIR2DL4	1.55e-38
cg02749789	YWHAE	1.64e-38
cg00468228	CRH	1.69e-38
cg26306893	SNHG11;SNORA71E	1.75e-38
cg10078898	MIR6717;TPPP2;AL161668.5	1.76e-38
cg06762457	ZC3H12D	1.96e-38
cg00112952	OR2B11	1.98e-38
cg07041214	OR56A3	1.99e-38
cg09120035	CYP11B1	2.14e-38
cg09174555	S100A8	2.19e-38
cg05353872	OR2M3	2.22e-38
cg12833018	SCGB2A2	2.22e-38
cg20785459	HBBP1	2.31e-38
cg02060465	SPRR4	3.26e-38
cg00333364	AC091053.1;SNORA45A	3.35e-38
cg05357039	AP003419.11;CLCF1;CTC-1337H24.4	3.67e-38
cg26087862	ENSA	3.76e-38
cg04244985	KIR3DX1	4.1e-38
cg22158769	RP11-173C1.1	4.9e-38
cg24881910	FCRL3	5.68e-38
cg08786003	FCRL3	5.8e-38
cg24381587	OR6N1	5.82e-38
cg26881287	LGALS13	6.67e-38
cg06749213	OR4K5	6.73e-38
cg25537993	ZSCAN1	6.73e-38
cg21529807	CEACAM4	6.86e-38
cg19681842	UBR7	7.28e-38
cg15147833	OR1C1	7.28e-38
cg13327545	RP11-573G6.8	8.31e-38
cg04505023	SPRR1A	9.69e-38
cg03309938	SNORD14E;SNORD14D;SNORD14C	9.76e-38
cg15889548	RP3-416H24.1;KRT86	1.04e-37
cg24376337	OR5AR1;OR5AR1	1.07e-37
cg02148612	TRIM58	1.11e-37
cg12003043	C22orf24	1.19e-37
cg00423453	OR51B6	1.47e-37
cg02478603	CD1B	1.68e-37
cg17004025	PRTN3	1.8e-37
cg17025555	OR6K6	1.96e-37
cg06073348	RP11-351I21.7	2.05e-37
cg13678641	AURKB	2.27e-37
cg15240320	OR8U1	2.3e-37
cg00744739	PRR21	2.41e-37
cg23462514	RNF212;RP11-20I20.2	2.5e-37
cg05329893	AMTN	2.6e-37
cg12151124	ICAM1	2.76e-37
cg21982437	SIGLEC17P	2.99e-37
cg02873384	OR51G2	3.3e-37
cg07172334	KRTAP24-1	3.46e-37
cg13974761	LCE2A	3.83e-37
cg04314261	CLEC12B	4.59e-37
cg18350545	OR2M1P	5.57e-37
cg20944283	ACKR1	6.02e-37
cg04490079	OR5K2	7.37e-37
cg26273129	HARS2	7.54e-37
cg01733284	OR10K2	7.68e-37
cg21751145	C2orf88	7.69e-37
cg18081940	SHE;TDRD10	7.7e-37
cg10269548	RASL11B	8.49e-37
cg11706983	RP1-170O19.14	1.04e-36
cg00080252	AARD	1.06e-36
cg24864399	CTD-2533K21.3;CTD-2533K21.2	1.06e-36
cg06784466	FPR3	1.26e-36
cg03185752	AGRN	1.32e-36
cg24095222	GLRXP3	1.47e-36
cg06510261	GCSAM;RP11-757F18.5	1.59e-36
cg09892262	KRTAP24-1	1.73e-36
cg13356175	S100A7L2	1.76e-36
cg26612727	ZPBP2	1.84e-36
cg02318454	CYP11B1	1.92e-36
cg07280593	LILRA1	2.13e-36
cg05948372	MIB1	2.26e-36
cg18487343	RBM8B	2.63e-36
cg19792599	PUS3	2.84e-36
cg19040702	MTND1P15;RP11-846F4.5	2.92e-36
cg00241002	RP13-16H11.7	3.25e-36
cg16065922	CALN1	3.25e-36
cg03192598	CTD-2666L21.1	3.79e-36
cg27071517	KRTAP13-1	3.87e-36
cg25840354	TLR10	3.94e-36
cg10703826	TBX15	4.1e-36
cg07797805	GINS1	4.29e-36
cg13755776	RP13-726E6.2	4.45e-36
cg16345226	CTC-429P9.4;SMIM7;TMEM38A	4.51e-36
cg20966659	NUP210P1	5.77e-36
cg15852352	OR10T2	5.95e-36
cg24344394	FCRL1	6.58e-36
cg12078211	RP11-97O12.3	6.94e-36
cg05784226	AC027612.4	7.59e-36
cg25119415	MNDA	7.91e-36
cg05245070	RP11-452I5.2	8.93e-36
cg08188069	SDR16C6P	9.12e-36
cg00715811	OR2W5	9.25e-36
cg04174658	OR4C15	1.07e-35
cg20196215	RFESDP1	1.07e-35
cg00467296	OR51A7	1.18e-35
cg25053164	RP11-452N4.1	1.21e-35
cg15593510	OR10T2	1.22e-35
cg07909128	SPRR1A	1.37e-35
cg12820481	NEK2;RP11-122M14.1	1.4e-35
cg10818986	OR2T8	1.49e-35
cg15985470	FGF6	1.63e-35
cg24145481	KRTAP25-1	1.67e-35
cg05732750	AC073343.13	1.75e-35
cg19802477	LILRA4	1.79e-35
cg07898617	ZNF273	2.05e-35
cg02825728	CLDN17	2.14e-35
cg02297967	LINC00968	2.24e-35
cg15042473	H2BFM	2.28e-35
cg20335590	ADAM2	2.37e-35
cg05789250	SNORD52	2.38e-35
cg19583265	NMS	2.67e-35
cg12937141	H2BFWT	2.69e-35
cg14982585	RHOT1P2	2.89e-35
cg23427912	TRIML1	2.9e-35
cg16361876	LCE2D	3.26e-35
cg22399133	CRYGD	3.27e-35
cg01395254	MYT1L	3.33e-35
cg26800915	OR51B4	3.73e-35
cg04741366	LINC01304	3.77e-35
cg04336859	SIGLEC12	3.93e-35
cg12472597	AP003419.11;CLCF1;CTC-1337H24.4	3.97e-35
cg14573759	RP11-94B19.7	4.25e-35
cg15887459	RP11-113D6.10	4.75e-35
cg05447916	VWA7	4.82e-35
cg26435481	SNORD114-9;SNORD114-10;SNHG24	5.84e-35
cg00073384	OR2M2	5.95e-35
cg19207486	RP11-157B13.3	6.75e-35
cg00592494	RP3-481A17.1	7.13e-35
cg03127563	C8orf86	7.21e-35
cg20141817	SPRR2G	7.89e-35
cg20099806	DDX42	7.99e-35
cg14269191	OR51B2;OR51B2	7.99e-35
cg16461692	PCDH20;RP11-432J3.4	8.71e-35
cg27096572	SMIM21	9.35e-35
cg02983759	LINC00111	9.71e-35
cg26740230	KRTAP13-1	9.89e-35
cg25940557	OR10Z1	1.1e-34
cg22115706	RP11-2E11.5;MEST;MESTIT1_1	1.14e-34
cg00817367	GRASP	1.25e-34
cg04778012	GPC2;STAG3	1.3e-34
cg04719574	LINC01366	1.4e-34
cg15556672	MRPS36	1.44e-34
cg03253995	SNORA48	1.88e-34
cg04841371	SPRR1A	1.9e-34
cg15006681	H1F0	2.1e-34
cg19009417	RGR	2.24e-34
cg14880282	RHOT1P3	2.53e-34
cg20980271	RP11-475E11.9;CLCC1	2.7e-34
cg05421392	OR5I1	2.76e-34
cg01839452	TRAV12-3	2.79e-34
cg09169531	SPRR2A	3.56e-34
cg08568561	TCP1P1	3.61e-34
cg03240663	SIGLEC5;SIGLEC5;SIGLEC14;RPL7P51	3.64e-34
cg01753209	LINC00111	4.21e-34
cg15522677	TYMSOS;RP11-806L2.5	4.62e-34
cg01772980	SCGB1D1	4.79e-34
cg23924801	OR2G3	4.89e-34
cg00097645	OR7D4	4.98e-34
cg19717640	LRIT2	5.48e-34
cg04281261	LINC00658;RP5-828H9.1	5.82e-34
cg16698575	OR51V1	6e-34
cg15811427	FPR2	6.62e-34
cg11800608	C20orf85	7.16e-34
cg03960217	LCE2C	8.23e-34
cg05693204	CTD-2194D22.5	8.52e-34
cg21298978	CYP11B1	9.35e-34
cg17895907	MIR514A3	9.43e-34
cg22396979	RP11-706C16.5;GML	1.06e-33
cg04902327	TRIM58	1.07e-33
cg22947965	OR8D4	1.16e-33
cg07159802	OR1C1	1.33e-33
cg18857759	OR2L8;OR2L8	1.36e-33
cg12798564	MIR4444-2;HNRNPA3P6	1.41e-33
cg23092040	RP11-973N13.2	1.55e-33
cg15930041	AC004699.1	1.57e-33
cg09771429	LDLRAD1	1.85e-33
cg22195627	CTD-2666L21.1	1.86e-33
cg07091500	RP11-443P15.2	1.88e-33
cg18087023	SPRR2D	1.99e-33
cg07059629	TRAV8-2	1.99e-33
cg17930169	SNORD113-7	2.14e-33
cg23213278	TRO	2.17e-33
cg02681040	MRGPRG	2.22e-33
cg21263710	RP11-25O3.1;DCC	2.26e-33
cg18082788	ZC3H12D	2.49e-33
cg05740582	HPYR1	2.5e-33
cg14507845	RP11-473E2.4	2.56e-33
cg24350202	LINC00680	2.57e-33
cg07014174	KRTAP11-1	2.73e-33
cg18343292	MS4A7;MS4A14	2.75e-33
cg16226642	OR5P3	2.82e-33
cg06521827	HSPB7	2.97e-33
cg07330196	LCE1A	3.02e-33
cg22932220	NME1-NME2	3.17e-33
cg19102271	C9orf40;C9orf41-AS1	3.28e-33
cg21207403	OR2L3	3.29e-33
cg23995666	MIR548I2	3.5e-33
cg23610154	LINC00710	3.83e-33
cg25072962	MS4A15	4.02e-33
cg23689630	RP11-323P17.2	4.03e-33
cg00160262	OR6P1	4.08e-33
cg09145139	CEP55	4.11e-33
cg00415971	RGR	4.12e-33
cg10179045	AC079305.8;HNRNPA3;MIR4444-1	4.21e-33
cg16429819	GPX1	4.44e-33
cg25259754	FCRL3	4.67e-33
cg16254330	CEACAM8;PSG3	5.01e-33
cg24168221	CST9	5.52e-33
cg20135307	PAX4	5.52e-33
cg11598872	FLJ45079	5.55e-33
cg26078436	HBBP1	5.58e-33
cg24988159	RBM17P4	5.7e-33
cg08441806	NKX6-2	5.82e-33
cg21901156	CYP11B1	5.99e-33
cg04138756	SPRR3	6.15e-33
cg05818824	SCN4A	6.9e-33
cg23621013	FAM180A	7.16e-33
cg04283307	OR2M5	7.45e-33
cg05304729	MNDA	8.32e-33
cg26425045	NAMPTP1	8.56e-33
cg02970836	AJ003147.9	8.69e-33
cg06692927	KRTAP19-1	9.22e-33
cg25098401	LCE2B	1e-32
cg25462303	GCSAM;RP11-757F18.5	1.01e-32
cg03679755	TPM4P1	1.11e-32
cg25550279	HAUS6P1	1.24e-32
cg02889647	IVL	1.25e-32
cg23295623	OR51A7	1.33e-32
cg25349643	MIR181B1;MIR181A1	1.4e-32
cg01792749	SCN10A	1.43e-32
cg05377387	WFDC1	1.43e-32
cg20810997	DEFB119	1.56e-32
cg08106339	OR51A2	1.59e-32
cg04439513	OR5K4	1.64e-32
cg17299007	OR2T27	1.68e-32
cg01357846	REG3G	1.82e-32
cg18233405	TSPYL5	2.08e-32
cg23194364	OR5E1P	2.13e-32
cg05811247	AURKB	2.33e-32
cg08971171	MIR25;MIR93;MIR106B	2.43e-32
cg19554569	OR51B5	2.48e-32
cg05046377	OR51A7	2.64e-32
cg05617798	AURKB	2.76e-32
cg19689368	FAM180A	2.79e-32
cg19090585	RP11-432M8.18	2.8e-32
cg06177278	ACTN2	2.81e-32
cg02764897	KRTAP13-1	3.04e-32
cg00718513	IGKV7-3	3.05e-32
cg00241941	RP11-760D2.1	3.43e-32
cg17811978	RP11-89N17.3	3.54e-32
cg18247055	SPAG6	3.59e-32
cg15717907	OR5I1	3.63e-32
cg01008164	OR52R1;OR52R1	3.72e-32
cg23371746	TBX15	3.72e-32
cg10119001	SPRR2C	3.82e-32
cg05907477	LINC00290	4.27e-32
cg08581018	MSLNL	4.83e-32
cg01890568	RP11-40A13.1	4.93e-32
cg21013206	DRD2	5.14e-32
cg02485642	MSLNL	5.2e-32
cg14119936	OR51F1;OR51F1	5.45e-32
cg01687040	DCD	5.48e-32
cg00986445	RBM8A;CH17-270A2.2	5.55e-32
cg06769546	NKX6-2	5.67e-32
cg05937737	SLC7A14	5.72e-32
cg22531183	CTD-2126E3.3	5.99e-32
cg14549976	RP11-154H12.3	6.04e-32
cg11162104	RNA5SP75	6.15e-32
cg10416814	RFESDP1	6.19e-32
cg23378396	LINC01019	6.28e-32
cg07696099	HPYR1	6.44e-32
cg05286724	GAGE10	8.42e-32
cg02805465	EIF2S3L	8.56e-32
cg13674558	UBE3D;DOPEY1	9.44e-32
cg07548313	CD1C	9.67e-32
cg23003832	ZDHHC12;RP11-545E17.3	9.87e-32
cg13822561	CASC6	1e-31
cg15298173	RP11-300A12.2;TUBBP8	1.02e-31
cg10796634	PAGE1	1.05e-31
cg02912371	SLC26A9	1.08e-31
cg12206199	RP11-173C1.1	1.11e-31
cg19371339	LCE2B	1.13e-31
cg13251666	TRGV7	1.15e-31
cg01407062	PRC1	1.17e-31
cg14189782	EHBP1L1	1.18e-31
cg22515937	FCRL1	1.18e-31
cg01657995	SNORD52	1.19e-31
cg12346967	KRTAP8-1	1.19e-31
cg02131862	KRTAP24-1	1.21e-31
cg18153989	MIR1298	1.55e-31
cg05733285	WFDC6	1.54e-31
cg24298684	MC3R	1.59e-31
cg26246880	PYHIN1	1.66e-31
cg11475420	KRTAP25-1	1.86e-31
cg10732871	GPX4	1.92e-31
cg24118715	DNA2	1.95e-31
cg08931647	MSLNL	1.96e-31
cg26995656	CTD-2007A10.1	2.01e-31
cg20792256	OR7A17	2.07e-31
cg04455646	IRAK2	2.13e-31
cg02459415	OR5L2	2.13e-31
cg05814135	RP3-510D11.2	2.17e-31
cg16477744	MIR153-2	2.28e-31
cg22665383	OR4C16;OR4C16	2.45e-31
cg09638704	OR2W5	2.47e-31
cg12930930	OR51B6	2.54e-31
cg10310310	MIR153-2	2.73e-31
cg26489750	Metazoa_SRP	2.93e-31
cg02759725	OC90	2.93e-31
cg22152605	FPR2	3.28e-31
cg05106269	ICAM1	3.36e-31
cg02749887	INS-IGF2;INS	3.43e-31
cg03449150	SPRR2F	3.63e-31
cg24936695	CLDN17	3.7e-31
cg01714553	RP11-51L5.2;RNU7-52P	3.72e-31
cg25977504	OR14A16	3.86e-31
cg17129400	NCOA6	3.87e-31
cg04436383	SLC10A6	3.93e-31
cg24884084	SPRR1B	4.09e-31
cg14569837	OR5AS1	4.14e-31
cg24627900	HPYR1	4.24e-31
cg09210088	CTD-2230M5.1;SSU72P1	4.43e-31
cg11191040	SNORA61;SNORA44;SNORA16A;SNORA16A	4.54e-31
cg18587476	AC008073.7;FAM228A	4.65e-31
cg07532354	SCGB1D1	4.71e-31
cg22790835	LINC00346	4.86e-31
cg12796469	RP11-714L20.1	5.12e-31
cg22601108	OR6K6	5.16e-31
cg01748263	ATP13A5	5.2e-31
cg10743062	NCOA6	5.26e-31
cg19521511	ZNF716	5.33e-31
cg13210618	AC105339.1	5.36e-31
cg06797253	LINC00229	5.37e-31
cg06874640	PHACTR1	5.49e-31
cg20649991	LILRB5	5.8e-31
cg07053841	OR2W1	5.91e-31
cg18279094	FOXD3-AS1	5.91e-31
cg13103143	RP11-547D24.1	5.96e-31
cg25533247	AKAP8L	6.14e-31
cg10827479	TCHHL1	6.26e-31
cg12907876	KCNJ9	6.42e-31
cg21790626	ZNF154	6.65e-31
cg20483694	OR8J1	6.88e-31
cg27026371	OR10G4	6.89e-31
cg09926260	MIR515-1;MIR519E	7.06e-31
cg17342247	TRPV1;SHPK	7.23e-31
cg17139392	RPL21P18	7.24e-31
cg25282652	FLJ37505	7.82e-31
cg16711450	INS-IGF2;INS	8.01e-31
cg25368943	MTND6P3;RP11-461G12.2	8.1e-31
cg03760839	TBX15	8.45e-31
cg24166463	OR51T1	8.67e-31
cg02886578	LELP1	8.67e-31
cg05370462	RPL35P1	8.8e-31
cg27362525	USP6	9.01e-31
cg10198932	LINC00479;LINC00112	9.1e-31
cg00444390	OR10A6;OR10A6	1.05e-30
cg05143386	OR7G2	1.05e-30
cg23325413	CTD-2161F6.3	1.08e-30
cg13935485	LINC01377	1.08e-30
cg15439294	NLRP5	1.12e-30
cg21580456	RP11-158I23.1	1.14e-30
cg22920417	AC034110.1	1.23e-30
cg24460817	OR6F1	1.26e-30
cg14511647	OR51A2	1.3e-30
cg10940251	MIR208A	1.3e-30
cg17501395	ZC3H12D	1.32e-30
cg24602572	H2BFM	1.45e-30
cg05618401	FAM180A	1.48e-30
cg04786857	RP11-713D19.1	1.55e-30
cg10424681	C6orf201	1.61e-30
cg02930356	CYP4F35P	1.61e-30
cg25028162	SIGLEC5;SIGLEC5;SIGLEC14;RPL7P51	1.71e-30
cg09433135	RTN2	1.83e-30
cg08009265	SPRR2B	1.86e-30
cg05207465	GEMIN5	1.87e-30
cg05032957	OR5E1P	1.95e-30
cg07344468	RP11-676M6.1	2.01e-30
cg16471362	HSPD1P21	2.3e-30
cg22771332	AC073869.20	2.33e-30
cg03264464	AC010761.6;TRAF4	2.37e-30
cg03757145	CDKL2	2.39e-30
cg12795893	SNORD59A	2.41e-30
cg18457737	SPATA19	2.46e-30
cg26601039	SOHLH2	2.54e-30
cg23746497	LINC00577	2.55e-30
cg26904260	MIR7154	2.56e-30
cg18268863	TRIM51	2.73e-30
cg02457680	SHE;TDRD10	2.9e-30
cg12228704	RP11-745L13.2	3.05e-30
cg19464917	ISL2	3.08e-30
cg04670031	GLRXP3	3.15e-30
cg16701896	RP1-170O19.14	3.21e-30
cg22643193	LINC01394	3.26e-30
cg08846272	NLRP13	3.4e-30
cg00510447	CLDN6	3.3e-30
cg10791422	MRGPRD	3.36e-30
cg17941572	LINC00466	3.54e-30
cg08970655	OR1L3	3.78e-30
cg06866232	OR51L1	3.79e-30
cg16692258	KRTAP24-1	3.89e-30
cg06555227	MIR153-2	3.95e-30
cg08870893	AARD	3.98e-30
cg27468419	SDR16C6P	4.07e-30
cg07458516	SZT2	4.45e-30
cg18675097	NKAPL	4.56e-30
cg11725972	RP5-912I13.1	4.6e-30
cg04456892	OR10A4	4.73e-30
cg20070090	S100A8	4.75e-30
cg22466653	OR4D1	5.07e-30
cg14565725	TBX15	5.15e-30
cg14909201	LINC00368	5.36e-30
cg17367472	KRTAP11-1	5.62e-30
cg13020760	ATP13A5	5.75e-30
cg17261125	LINC00710	6.44e-30
cg06760904	AC093390.1	6.71e-30
cg16408815	RP4-801G22.3	6.87e-30
cg16723982	EIF2AK4	7.03e-30
cg06029905	MIR483	7.03e-30
cg13705774	LCE2A	8.57e-30
cg00301372	YY1P2	8.82e-30
cg08543028	RP11-467L13.4	9.01e-30
cg12296772	MTMR7	9.09e-30
cg00261162	SNORA61;SNORA44;SNORA16A;SNORA16A	9.79e-30
cg14591460	KLK9;KLK9	9.92e-30
cg26642960	LILRB3;CTB-83J4.1	1.01e-29
cg15036529	PYHIN1	1.05e-29
cg06705986	RGR	1.07e-29
cg02969408	FAM138E	1.07e-29
cg06484553	VSTM4	1.1e-29
cg09744151	SNORA71C	1.14e-29
cg06509223	RFESDP1	1.16e-29
cg17551002	OR6Y1	1.23e-29
cg05042749	RP11-347H15.1	1.28e-29
cg11581627	CD33	1.31e-29
cg10805440	KRTAP27-1	1.4e-29
cg19404979	ELSPBP1	1.43e-29
cg09258315	RP11-358D14.3	1.46e-29
cg13325233	RP11-218C23.1	1.46e-29
cg21149595	COX8C	1.5e-29
cg10460946	RP11-219G17.8	1.53e-29
cg20131968	DDX42	1.55e-29
cg02870011	FLJ37505	1.58e-29
cg14819820	OR4D2	1.58e-29
cg07313373	NLRP3	1.61e-29
cg12687069	OR51I2	1.63e-29
cg25394572	RP11-59K5.1	1.65e-29
cg04351905	OLIG1	1.67e-29
cg25607161	OR1A1	1.68e-29
cg05503824	ATP13A5	1.68e-29
cg03517998	FAM183B	1.73e-29
cg18116418	LCE3D	1.74e-29
cg09346831	RP11-583F24.8	1.74e-29
cg22025210	RP11-492L8.1	1.75e-29
cg27086014	SIGLEC12	1.75e-29
cg13822911	LINC00460	1.76e-29
cg08536961	COL6A5	1.78e-29
cg13408605	SIRPG	1.83e-29
cg27393162	RP11-154H17.1	1.83e-29
cg02020350	FPR2	1.88e-29
cg17399417	RP13-895J2.8	2e-29
cg14995492	KRT18P16	2.01e-29
cg10598596	CTC-518B2.12	2.16e-29
cg01993907	RP11-1137G4.4	2.23e-29
cg23016600	OR2C3	2.37e-29
cg09515953	PPP1R14A	2.37e-29
cg26147279	TPRXL	2.41e-29
cg03731268	L1TD1	2.43e-29
cg23596249	RP11-39C10.1	2.46e-29
cg06211255	FRMD8	2.56e-29
cg08802513	RP11-161P17.2;POM121L13P	2.7e-29
cg23291865	TMEM230	2.71e-29
cg13535489	LILRB5	2.8e-29
cg18504937	KLK9;KLK9	2.82e-29
cg11068946	NKX6-2	2.83e-29
cg02583247	FGF6	2.84e-29
cg00869796	RP11-446H18.5	2.95e-29
cg22557662	PPP1R14A	2.96e-29
cg18862481	TRH	2.98e-29
cg02788731	OR2G2	3e-29
cg11176990	RP11-173C1.1	3.2e-29
cg12647861	H2BFWT	3.35e-29
cg00504075	SYT11	3.43e-29
cg10512498	WDR17	3.81e-29
cg20410409	OR6K6	3.78e-29
cg01967564	C16orf82	3.78e-29
cg09099868	RP11-573G6.8	3.84e-29
cg00564759	AC009133.15;AC009133.24	3.93e-29
cg04730443	MAGEB6	4.18e-29
cg01244342	HLA-DQA2	4.28e-29
cg05598886	MIR1225;RP11-304L19.1	4.35e-29
cg25520146	HPYR1	4.36e-29
cg23207876	AC004699.1	4.36e-29
cg26808293	THOC6	4.4e-29
cg03200309	RP11-370I10.10;H1FNT	4.47e-29
cg17033333	RP11-24P24.1	4.51e-29
cg23131909	MIR26B	4.68e-29
cg02905828	SNORD22;SNORD30;SNORD22;SNORD28;SNORD27;SLC3A2	4.72e-29
cg11377136	PKDREJ	5.07e-29
cg20449590	RNVU1-8	5.27e-29
cg04673666	RP11-321E2.12	5.23e-29
cg01977448	KRTAP13-1	5.54e-29
cg15811371	MUC16	5.67e-29
cg14079243	AGTPBP1	5.92e-29
cg06580419	VWC2L	6.71e-29
cg09763347	HPYR1	6.93e-29
cg21106946	LGMNP1	7.15e-29
cg25278353	LINC01375	7.15e-29
cg13967888	RP11-307E17.8	7.19e-29
cg00935894	SYBU	7.43e-29
cg25863892	TMPRSS11BNL	7.82e-29
cg06468780	KRTAP13-2;KRTAP13-3	7.84e-29
cg09437135	MKRN3	8.45e-29
cg19754901	PPATP1	8.9e-29
cg20699586	RNA5SP77	8.99e-29
cg12111295	KRTAP11-1	9.18e-29
cg05840553	SNORA65;LRSAM1	9.21e-29
cg16659728	MRGPRD	9.23e-29
cg08904363	NAPEPLD	9.26e-29
cg09367967	MIR6515	9.26e-29
cg22204954	SPRR2F	9.49e-29
cg23402769	ANKMY2;BZW2	9.52e-29
cg07711097	RP11-706C16.5;GML	9.69e-29
cg12978582	MIR4649	9.71e-29
cg04388226	FLJ37505	1e-28
cg14261868	HIST2H2AA4	9.78e-29
cg18385570	OR7C2	9.79e-29
cg18125846	FLYWCH1P1	9.83e-29
cg16431978	KRTAP13-2;KRTAP13-3	9.91e-29
cg05440289	IVL	1.04e-28
cg05946604	OR1A1	1.09e-28
cg00154455	ZNF517	1.09e-28
cg23391785	DNM3	1.11e-28
cg11009736	MARCO	1.19e-28
cg24832498	HBE1;AC104389.28	1.21e-28
cg12046056	MED6	1.27e-28
cg00535683	SPRR2C	1.29e-28
cg12438576	NOX4;RP11-745I13.1	1.3e-28
cg14118267	CTD-2139B15.2	1.33e-28
cg12664119	TBX15	1.31e-28
cg27410165	RP11-583F24.4	1.37e-28
cg23581186	KRTAP21-2	1.39e-28
cg15420615	GLRXP3	1.4e-28
cg05083067	OR51D1	1.4e-28
cg04866380	PPP1R17	1.43e-28
cg24913110	AF238378.7	1.43e-28
cg16838729	RP11-663P9.2	1.43e-28
cg24646841	AC011899.10	1.46e-28
cg03271520	OR1A2	1.46e-28
cg23970028	RP11-709P2.1	1.47e-28
cg10232893	RP5-858B6.1	1.47e-28
cg05252264	FCAR	1.47e-28
cg01507200	OR6F1	1.56e-28
cg08835992	OR5E1P	1.59e-28
cg16691944	ZNF445	1.61e-28
cg24802813	TRGV5	1.62e-28
cg20944521	RPL4P1	1.69e-28
cg07661389	OR2J3	1.76e-28
cg12799677	Y_RNA	1.81e-28
cg16027403	OR14A16	1.82e-28
cg08174890	MIR548I2	1.82e-28
cg01731341	FGF6	1.82e-28
cg04979435	THAP11	1.83e-28
cg16221927	SNORD114-13;SNORD114-14	1.92e-28
cg20823348	AC068057.1	1.92e-28
cg25516853	SNORA38	1.94e-28
cg01947943	OR2W1	1.96e-28
cg15157455	HIST2H2BB;RP5-998N21.10;RP5-998N21.7;HIST2H3PS2	2.08e-28
cg17522897	AC009729.1	2.09e-28
cg14125733	SNORD114-4;SNORD114-5;SNORD113	2.14e-28
cg02203420	SLC24A2	2.15e-28
cg11579116	EMR4P	2.17e-28
cg02571816	PPP1R14A	2.17e-28
cg21433558	CCR10	2.21e-28
cg23434090	OR51L1	2.22e-28
cg15533453	RP11-526P5.1;RP11-526P5.2	2.27e-28
cg01917716	MS4A3	2.34e-28
cg19544919	PGPEP1	2.35e-28
cg26369418	CSF2	2.41e-28
cg17694795	TCF24	2.44e-28
cg02279953	SNORD114-10;SNHG24;SNORD114-11;SNORD114-12	2.55e-28
cg13253945	AC074183.3;AC074183.4	2.53e-28
cg10976626	CD1E	2.68e-28
cg19611002	ACTL9	2.8e-28
cg21794066	MTND1P15;RP11-846F4.5	2.89e-28
cg27584713	PHACTR1	3e-28
cg07833342	RP5-828H9.1	3.06e-28
cg21384977	KLHL1	3.3e-28
cg03100024	ZNF574	3.19e-28
cg04972930	OR6N1	3.41e-28
cg01379207	RP11-676M6.1	3.42e-28
cg15644389	C22orf24	3.45e-28
cg12308965	CABP2	3.58e-28
cg00374101	CNBD1	3.59e-28
cg08060810	OR5D18	3.61e-28
cg19255241	OR2W3	3.68e-28
cg11294513	ZNF154	3.73e-28
cg25628429	OR4C12	3.82e-28
cg16241541	KRTAP13-1	3.89e-28
cg04006516	KRTAP20-2	3.92e-28
cg19250571	OR51S1	3.9e-28
cg00238249	C6orf57	3.9e-28
cg25591451	TRIM4	3.94e-28
cg19949697	RP11-404I7.2	3.99e-28
cg01077713	RP11-583F24.4	4.1e-28
cg23679434	LILRB3;CTB-83J4.1	4.27e-28
cg23016129	SPAG6	4.3e-28
cg06720467	SFN	4.3e-28
cg26333802	CHRNE	4.31e-28
cg02705035	SNORD115-24	4.4e-28
cg11266667	CT55	4.42e-28
cg06341047	LINC01212	4.53e-28
cg13195526	IL22	4.85e-28
cg11938051	ZNF717	4.88e-28
cg25420238	P2RY10	4.91e-28
cg23363039	ANO2	4.96e-28
cg16812893	KRTAP15-1	4.98e-28
cg25246031	IGFL1	4.99e-28
cg14715697	RP11-398J5.1	5.14e-28
cg00006397	NHLH1	5.15e-28
cg09858281	SNORD5	5.25e-28
cg04107679	REXO1L8P	5.47e-28
cg15645344	RP11-39C10.1	5.53e-28
cg22287731	TRIM51HP	5.57e-28
cg12921481	OR6N2	5.61e-28
cg17114501	MIR3924	5.72e-28
cg19197419	UBE2C	5.66e-28
cg25803107	LINC01105	5.74e-28
cg20315124	CTD-2533K21.3;CTD-2533K21.2	5.75e-28
cg06954535	PGLYRP4	5.77e-28
cg00472640	RP11-123I22.1	5.93e-28
cg15410343	RP13-492C18.2	6.05e-28
cg17269633	C17orf104	6.31e-28
cg26687173	WDR88	6.43e-28
cg02514003	TPO	6.49e-28
cg25102872	PPP1R2P10	6.55e-28
cg00448761	CTC-232P5.3	6.5e-28
cg20479688	KRT2	6.55e-28
cg16604126	OR51E1	6.71e-28
cg05891548	CEACAM4	6.73e-28
cg07871456	LUC7L3	6.8e-28
cg12129480	OR10X1;OR10X1	6.81e-28
cg01807825	GK2	6.88e-28
cg04895001	OR2AG1;OR2AG1	7.06e-28
cg13041637	OR6X1	7.09e-28
cg05656374	MX2	7.28e-28
cg23219336	LELP1	7.47e-28
cg14830002	OR2B11	7.55e-28
cg19921353	HLA-DPB1	7.95e-28
cg24781699	RP11-386M24.6	8.05e-28
cg25261331	SIGLEC9	8.15e-28
cg16829453	CACNA1G	8.15e-28
cg00399175	GAREML	8.19e-28
cg02223801	MIR153-2	8.37e-28
cg01343097	OR2M1P	8.39e-28
cg00243661	OR2D2	8.89e-28
cg01802121	TRAV5	9.31e-28
cg18499148	OR51F2	9.37e-28
cg24629972	POTEA	9.55e-28
cg07514654	AC006372.4	9.57e-28
cg06704573	RP1	9.85e-28
cg22319311	TSPYL5	9.97e-28
cg23647410	HLX	1.01e-27
cg08684473	LILRB5	1.01e-27
cg06844661	KIAA1024L	1.05e-27
cg14789818	RNA5SP77	1.08e-27
cg07039560	SLC25A2	1.09e-27
cg16846514	TRIM64EP	1.16e-27
cg03109316	ZNF80	1.18e-27
cg27235829	OR10K2	1.18e-27
cg03369828	PAGE1	1.24e-27
cg20676475	LCE3D	1.24e-27
cg18369913	OR4C46	1.28e-27
cg04195127	WFDC1	1.28e-27
cg01896432	GCOM2	1.28e-27
cg03599224	TNF	1.3e-27
cg17881513	RP11-177H2.1	1.33e-27
cg05904135	NKX6-2	1.34e-27
cg09102690	RP11-40A13.1	1.43e-27
cg15903915	NEUROD6	1.45e-27
cg19716004	CYP51A1P1	1.47e-27
cg15767191	OR10G8	1.51e-27
cg02347881	LINC00410	1.51e-27
cg21948827	PDCL3P4	1.52e-27
cg14535518	MAG	1.55e-27
cg18756179	CTD-2126E3.3	1.59e-27
cg27553638	SPANXA1;SPANXD	1.61e-27
cg08080145	RAB37	1.61e-27
cg25452231	MTCL1P1	1.63e-27
cg01424997	NLRP13	1.63e-27
cg25391162	FOXD4	1.65e-27
cg02018326	SIGLEC17P	1.66e-27
cg27004195	RNU6-561P	1.69e-27
cg20181079	OR4D11	1.76e-27
cg05940231	TBX15	1.76e-27
cg03828557	OR52I2	1.79e-27
cg00212119	RP11-281O15.4	1.79e-27
cg09449853	ATP13A5	1.82e-27
cg13175120	RP11-600K15.1	1.86e-27
cg11554507	NEUROD6	1.88e-27
cg07596645	TNNT2	1.89e-27
cg05391338	PATE1	1.99e-27
cg18032812	RP13-580B18.1	2e-27
cg26059632	SPRR2A	2e-27
cg05899471	SNORD114-29;SNORD114-30	2.03e-27
cg24838349	KIR2DL4	2.05e-27
cg02245566	OR6K2	2.06e-27
cg01093088	PGLYRP4	2.08e-27
cg12377139	SPAG6	2.1e-27
cg13510813	ZNF574	2.12e-27
cg27105123	RDH13;EPS8L1	2.22e-27
cg19856444	SLC39A12	2.23e-27
cg12583591	MUC16	2.29e-27
cg21548131	NLGN1-AS1	2.41e-27
cg10171448	NKX6-2	2.39e-27
cg26173997	CDKL2	2.43e-27
cg06400301	OR2T33	2.43e-27
cg02861926	NLRP11	2.43e-27
cg25370228	RP11-143A12.3	2.45e-27
cg02077084	OR2T6	2.49e-27
cg19772066	CTC-512J12.4;ZNF229	2.5e-27
cg02484411	AC093326.1	2.6e-27
cg17155417	SLC25A5P3	2.64e-27
cg15104622	RP11-217C7.1	2.69e-27
cg17470497	OR2M4	2.71e-27
cg14953197	SIGLEC12	2.74e-27
cg06735218	OR51E1	2.87e-27
cg21527708	CHIAP2	2.9e-27
cg11016293	ARL5A	2.94e-27
cg02893550	CTD-2555A7.2	3.06e-27
cg06501113	CNN3P1	3.08e-27
cg24000437	LCE3E	3.08e-27
cg05777962	OR2B11	3.08e-27
cg25686172	LINC01105	3.11e-27
cg11919336	HCAR2	3.3e-27
cg17761772	SIGLEC9	3.36e-27
cg04198912	MFSD4	3.38e-27
cg00520188	SNX18P26;LINC00328-2P	3.5e-27
cg05087623	UBD	3.52e-27
cg04160046	AC005176.2	3.61e-27
cg03719128	ZEB1	3.61e-27
cg03828745	RP11-307E17.8	3.73e-27
cg12750151	OR5D18	3.74e-27
cg15482082	DRD5	3.76e-27
cg24582475	OR2B11	3.79e-27
cg07649992	RPL18P13	3.85e-27
cg15922045	COL6A6	3.86e-27
cg03361379	MIR153-2	4.1e-27
cg26214742	H2AFY	4.15e-27
cg16006965	GCSAM;RP11-757F18.5	4.18e-27
cg09893424	CTD-2533K21.3	4.38e-27
cg27392792	PTPRN2	4.43e-27
cg26461666	TRBV23-1	4.46e-27
cg02721374	OR1D2	4.48e-27
cg00883837	OR2T6	4.48e-27
cg24667326	SPRR3	4.55e-27
cg24310126	DMBT1P1	4.59e-27
cg25123866	PYGM	4.83e-27
cg01345234	FRG2DP	4.88e-27
cg16327839	SPATA19	5.11e-27
cg12614630	GPR182	5.2e-27
cg03544320	CRMP1	5.28e-27
cg00458317	KRTAP24-1	5.29e-27
cg04336379	RBAKDN	5.3e-27
cg24528164	RPP21	5.55e-27
cg12547930	WFDC6;HSPD1P21	5.57e-27
cg26432539	SPATA8-AS1;SPATA8	5.63e-27
cg19345602	PATE1	5.7e-27
cg05726701	OR11L1	5.77e-27
cg24119869	KIR3DX1	5.99e-27
cg10956848	LINC00898;RP11-191L9.4	6.3e-27
cg25950564	GOLGA6L2	6.34e-27
cg25819275	OR2G6	6.53e-27
cg12070069	PHACTR1	6.54e-27
cg09965363	GOLGA8CP	6.58e-27
cg26122963	PCOLCE	6.65e-27
cg26033782	RP11-440K22.1	6.76e-27
cg03862760	PSMG3-AS1	6.73e-27
cg13027458	APOOP5	6.74e-27
cg13533935	RP11-148O21.4	7.22e-27
cg05513274	LINC01234	7.43e-27
cg18525817	RP6-24A23.6;RP6-24A23.3	7.43e-27
cg17376861	RP11-321E2.13	7.45e-27
cg04494051	AP003419.11;CLCF1	7.55e-27
cg00202246	OR13C8	7.64e-27
cg01079950	RP11-432M8.18;RP11-432M8.17	7.61e-27
cg02381385	SIGLEC12	7.69e-27
cg05715828	LRRC8A	7.99e-27
cg01292613	NLRP8	8e-27
cg24652919	THOC6	8.15e-27
cg00600110	FAM9A	8.36e-27
cg11472786	HDAC11-AS1	8.54e-27
cg00938877	OR2L2	8.62e-27
cg21503476	FOXI1	8.66e-27
cg09478478	CD1E	9.02e-27
cg16026627	DDN	9.13e-27
cg14062083	KRTAP13-4	9.65e-27
cg00069261	RP11-21M24.2	9.74e-27
cg00937286	RP11-452N4.1	9.82e-27
cg20144488	SIGLEC16	9.89e-27
cg06400319	SPRR2B	1.01e-26
cg13951490	PCDHGA11	1.02e-26
cg01730032	RP11-400D2.2;PES1P1	1.03e-26
cg07309576	OR51I1	1.05e-26
cg13697387	LCE2A	1.06e-26
cg05142358	RP11-123I22.1	1.08e-26
cg20144261	HAR1A;HAR1A	1.09e-26
cg00554539	SNORD114-21;SNORD114-22;SNORD114-23	1.12e-26
cg06534464	RP11-386M24.3	1.11e-26
cg06499030	HLA-DQB2	1.12e-26
cg16126760	AC005358.3	1.14e-26
cg23900936	OR10Q1	1.16e-26
cg17264670	RGS17	1.2e-26
cg12528485	KRT18P29	1.26e-26
cg22682200	RP11-245J24.1	1.27e-26
cg02299360	LINC01136	1.27e-26
cg24505618	DUOXA1;DUOX1	1.29e-26
cg11141692	LYPLA1P2	1.33e-26
cg12324708	RP11-114H7.2	1.35e-26
cg16306898	TMEM240	1.39e-26
cg13105234	RP13-1016M1.2	1.4e-26
cg09203716	LINC01019	1.4e-26
cg15362155	SCGB1D4	1.41e-26
cg05241157	FTH1P10	1.44e-26
cg02425372	KRT1	1.45e-26
cg06518388	PSG4	1.48e-26
cg04625905	ATP10B	1.52e-26
cg06221609	LCE1A	1.52e-26
cg23335976	SLC39A12	1.52e-26
cg19238824	FAM180A	1.54e-26
cg03898365	OR10A4	1.56e-26
cg21008808	VPS26B	1.56e-26
cg21171639	RPL4P5	1.56e-26
cg10919344	OR5A1	1.56e-26
cg04404543	RP11-793H13.10	1.57e-26
cg05943574	OR2G6	1.57e-26
cg26465522	MAGEC2	1.59e-26
cg02926298	RP11-673P17.2	1.59e-26
cg20672708	TM9SF4	1.63e-26
cg01148014	RHOT1P2	1.66e-26
cg24402683	ZNF556	1.68e-26
cg02810967	DCAF16	1.7e-26
cg20729460	RPL17P19	1.79e-26
cg01447112	AC073343.13	1.79e-26
cg03770410	ZNF831	1.81e-26
cg02601618	CCT8L2	1.81e-26
cg23106865	MTRNR2L6	1.85e-26
cg06834698	OR10A3	1.88e-26
cg05804220	DUOXA1;DUOX1	1.91e-26
cg05881682	MTHFD2P1	1.97e-26
cg00520933	ZEB1	2.02e-26
cg26167424	POLR2A	2.03e-26
cg20542190	LILRA4	2.1e-26
cg20335425	S100A8	2.13e-26
cg09828634	KRTAP19-2	2.2e-26
cg13698168	LINC00346	2.22e-26
cg01732538	FTH1P20	2.23e-26
cg09886849	RP11-701H24.7	2.28e-26
cg04784724	SIGLEC11	2.32e-26
cg12056138	REC114	2.34e-26
cg20185945	ZP4	2.35e-26
cg07740199	CYP4F35P	2.37e-26
cg13219190	SNORD115-14	2.39e-26
cg21754343	LCE2B	2.43e-26
cg25179758	SPG20-AS1	2.43e-26
cg13742513	SLC25A41	2.45e-26
cg12050434	RP11-609L23.2	2.47e-26
cg09444405	PSG1	2.49e-26
cg09682848	RP13-895J2.9	2.53e-26
cg09188099	HOTTIP_4	2.55e-26
cg21817287	KRT18P56	2.62e-26
cg00665650	PAIP2	2.66e-26
cg24169915	C14orf177	2.7e-26
cg22000472	LINC00458	2.73e-26
cg13546935	RP11-713D19.1	2.87e-26
cg15016628	BRS3	2.98e-26
cg21700582	NDUFAF4P2	3.01e-26
cg18639238	AC144450.1	3.15e-26
cg14184077	GRXCR1	3.2e-26
cg25330366	VPREB1	3.24e-26
cg04212239	IFT80	3.25e-26
cg02303399	LELP1	3.26e-26
cg08279693	LCE2B	3.29e-26
cg16362603	SEMA3G	3.31e-26
cg15378486	ACTG1	3.36e-26
cg26093611	RXFP2	3.42e-26
cg05210558	AP003025.2	3.56e-26
cg10076479	LINC01249	3.56e-26
cg06718003	OR10H3	3.96e-26
cg16651126	HOXA4	3.97e-26
cg00126657	SSX6	4.03e-26
cg13531120	LINC00346	4.03e-26
cg04442388	HECW1	4.07e-26
cg00910338	SNORD114-6	4.29e-26
cg22968167	OR51G1;OR51G1	4.3e-26
cg27040525	SIGLEC8	4.31e-26
cg16506887	RP11-560B16.5;OR10A5	4.51e-26
cg11522069	AC004006.2	4.71e-26
cg15776494	KLK1	4.72e-26
cg22076757	MYBPHL	4.79e-26
cg10205430	PROP1	4.79e-26
cg11583392	SLC26A5	4.82e-26
cg25598400	KRT32;RNU2-32P	4.9e-26
cg26450106	CST7	4.96e-26
cg11056129	LINC01548	4.97e-26
cg25291026	OR5M1	5.01e-26
cg27331871	IGF2	5.1e-26
cg19055323	KRTAP4-1	5.2e-26
cg24765446	WFDC6	5.24e-26
cg21652803	RP11-756K15.2	5.37e-26
cg17755386	RP11-269F19.2;SNORD46;SNORD38A;SNORD38B;SNORD38B	5.45e-26
cg22673542	OR2T10;Y_RNA	5.48e-26
cg13850871	AGPAT2	5.52e-26
cg27219362	AC006372.4	5.53e-26
cg01242426	OR56A1	5.7e-26
cg07908160	MKS1	5.72e-26
cg14489199	SNORD114-26;SNORD114-27	5.9e-26
cg13871799	RP11-520B13.8	5.83e-26
cg08865099	RP1-170O19.17;EVX1	5.83e-26
cg02553054	SMARCD1	5.85e-26
cg00119186	OR6K2	5.98e-26
cg01972576	RP11-706C16.5	5.99e-26
cg00158654	RGS21	6.01e-26
cg21554552	RASSF1;ZMYND10-AS1	6.01e-26
cg13289364	OR4A47	6.01e-26
cg08145178	H2BFM	6.13e-26
cg12223562	AC097374.2	6.25e-26
cg06379640	PRR32	6.39e-26
cg15826426	SPATA8	6.41e-26
cg17736443	HIST1H2AJ;HIST1H2BM	6.64e-26
cg00534479	MIR218-2	6.64e-26
cg00949578	SMIM21	6.79e-26
cg10072162	RP11-552E4.2	6.91e-26
cg14877502	MIR4444-2;HNRNPA3P6	6.93e-26
cg01558151	RN7SKP114	6.96e-26
cg23053374	OR52J3	6.98e-26
cg15393702	ANKRD29	7.01e-26
cg04096085	SNORD114-12;SNORD114-13	7.17e-26
cg01548463	FAM180A	7.24e-26
cg15918587	MIR891B	7.39e-26
cg16255697	MIR1911	7.29e-26
cg25019567	RP11-385M4.2	7.57e-26
cg19265143	SNORA61;SNORA44;SNORA16A;SNORA16A	7.71e-26
cg18269219	RP11-24P24.1	7.76e-26
cg00224026	CT55	7.8e-26
cg06693048	EYA1	8.23e-26
cg26180242	CTD-2334D19.1	8.08e-26
cg21588562	FTMT	8.2e-26
cg18009704	OR1A1	8.22e-26
cg18815018	TRAV8-2	8.57e-26
cg04237529	OR6K2	8.62e-26
cg15728909	CDH19	8.82e-26
cg24260917	LILRB2;MIR4752	8.78e-26
cg25212131	SLC25A2	8.8e-26
cg06613840	GPX1	8.81e-26
cg18730194	LINC00701	8.88e-26
cg16476048	TEX36;RP11-383C5.3	9.16e-26
cg06963672	SNORD114-23;SNORD114-24	9.32e-26
cg27590787	RN7SL687P;U52111.1	9.63e-26
cg02735829	OR2Y1	9.67e-26
cg05024715	OR10S1	9.89e-26
cg06611810	CYP2T1P	9.89e-26
cg17067638	SNORD115-10	1e-25
cg15526941	PERM1	1.01e-25
cg04975143	ADAM6	1.05e-25
cg03528325	CD1A	1.05e-25
cg00372774	PRAME;LL22NC03-63E9.3	1.05e-25
cg16888547	PDE1C	1.07e-25
cg07390791	LINC01107	1.08e-25
cg14005025	AP000479.1	1.08e-25
cg06244417	FCN1	1.1e-25
cg18820060	LINC01019	1.1e-25
cg24403041	POTED	1.1e-25
cg05891292	POM121L12	1.12e-25
cg08077337	RP11-107N15.1	1.13e-25
cg15821095	RBM15B	1.15e-25
cg11413039	PUS3	1.15e-25
cg20805835	OR11L1	1.15e-25
cg08678055	TBC1D21	1.16e-25
cg27033919	SNORD22;SNORD30;SNORD22;SNORD28;SNORD27;SLC3A2	1.16e-25
cg02965895	OR51L1	1.18e-25
cg13564825	PPP1R14A	1.2e-25
cg26396278	OR2T27	1.27e-25
cg01378182	AC004692.4	1.28e-25
cg25121589	GUSBP10	1.28e-25
cg00305947	MC5R	1.3e-25
cg15210787	TGIF2LX	1.32e-25
cg21769702	RP11-676M6.1	1.35e-25
cg08538258	BX322557.10	1.39e-25
cg24755177	LILRA4	1.4e-25
cg05187247	SNORD114-28;SNORD114-29	1.45e-25
cg11779053	RP11-321E2.13	1.42e-25
cg06190616	OR2B11	1.42e-25
cg07070466	TGIF2LX	1.44e-25
cg20682222	GRXCR1	1.46e-25
cg04721828	OR4X1;OR4X1	1.46e-25
cg05232914	OR5H6;OR5H6	1.51e-25
cg10346364	AP003419.11;CLCF1;CTC-1337H24.4	1.55e-25
cg05004506	OR51G1;OR51G1	1.56e-25
cg24082174	RP11-573D15.9;SNORA63;MIR1248;SNORA81;SNORA63;SNORA4	1.57e-25
cg22142212	MIR767;MIR105-2	1.61e-25
cg14505434	RP11-358N4.5	1.65e-25
cg11015893	FAM180A	1.66e-25
cg05663558	MAG	1.68e-25
cg11436222	HIST1H3E	1.68e-25
cg22616525	LCE2A	1.69e-25
cg20681626	SIGLEC9	1.7e-25
cg13018120	CD300E	1.72e-25
cg11517269	ZSCAN12P1	1.73e-25
cg26625319	NCAPH	1.75e-25
cg20245568	OR5B17	1.76e-25
cg25956062	RP11-535N6.2	1.79e-25
cg20333067	C17orf75;MIR632;ZNF207	1.84e-25
cg07959741	SNORD114-4;SNORD114-5	1.87e-25
cg03068446	TRIM49D1;TRIM49D2	1.88e-25
cg09601514	MARCO	1.88e-25
cg05886367	BTNL9	1.96e-25
cg11169848	AP003419.11;CLCF1;CTC-1337H24.4	1.96e-25
cg23352271	RP11-163O19.8	2e-25
cg05924254	RNF212;RP11-20I20.2	2.04e-25
cg01738984	MRGPRG	2.04e-25
cg20576955	OR52I2	2.06e-25
cg06778013	MAGEB6	2.07e-25
cg18426860	RP11-13P5.2	2.08e-25
cg27149471	OR5T1	2.08e-25
cg08026930	NLRP8	2.09e-25
cg01322400	RNPS1P1	2.14e-25
cg25651984	MAGEC1	2.15e-25
cg04088474	RP11-122C5.2	2.18e-25
cg07395806	OR2G6	2.22e-25
cg27049766	ZNF154	2.22e-25
cg21643045	CCL20	2.23e-25
cg24432073	CDKL2	2.25e-25
cg00705992	HOXA11;HOXA11-AS1_4;HOXA11-AS1_5	2.26e-25
cg24332770	LCE2B	2.28e-25
cg19537184	MIR526A1;MIR520C	2.33e-25
cg21236090	KRT18P56	2.34e-25
cg07665650	RP11-420O16.1	2.44e-25
cg09070846	ZDHHC20P4	2.46e-25
cg17770461	RP11-321E2.13	2.51e-25
cg26353448	OR2T4	2.57e-25
cg25164009	LINC01442	2.6e-25
cg23049458	L1TD1	2.6e-25
cg01076051	RP11-114H7.2	2.61e-25
cg14871313	RP11-393K12.2	2.62e-25
cg16688583	PGR	2.64e-25
cg05661282	ZNF154	2.73e-25
cg10904867	MFRP;MFRP	2.73e-25
cg20988440	MIR16-1;MIR15A	2.76e-25
cg10791343	POM121L12	2.79e-25
cg27441409	S100A7L2	2.86e-25
cg21691717	PGLYRP4	2.88e-25
cg25147941	CTD-2313P7.1	2.9e-25
cg22900415	GJA3	2.96e-25
cg16545438	RP11-112J1.1	3e-25
cg19445072	ZDHHC20	3.01e-25
cg17296650	OR10G7	3.12e-25
cg05305140	SDR16C5	3.14e-25
cg06384912	GUSBP12	3.16e-25
cg24359868	HSPD1P7	3.25e-25
cg21139935	PSPC1P2;RP11-556N21.1	3.33e-25
cg23759189	AP003025.2	3.4e-25
cg24850860	CSNK1A1L	3.42e-25
cg10242788	ADAM5	3.47e-25
cg21902327	FGF6	3.47e-25
cg24826339	AC079776.2	3.5e-25
cg15760257	CTB-96E2.10	3.65e-25
cg17086370	TYRO3	3.68e-25
cg09513416	RP11-134K13.2	3.71e-25
cg14419869	RP11-192C21.1	3.74e-25
cg13798289	THAP11	3.75e-25
cg05913198	MLLT10	3.78e-25
cg05080154	RP11-849I19.1;SALL3	3.79e-25
cg10344081	CDKL2	3.79e-25
cg00005215	SERPINB12	3.81e-25
cg16745086	POTEE	3.84e-25
cg07303143	KIAA1143;KIF15	3.91e-25
cg15602298	FCRL3	4.04e-25
cg00249511	CDHR5;SCT	4e-25
cg05553829	SDR16C6P	4.06e-25
cg03526459	RNVU1-8	4.08e-25
cg27093637	OR51M1	4.11e-25
cg11393995	SERPINB1	4.15e-25
cg07900024	DEFB116	4.28e-25
cg26442740	OR10A7	4.31e-25
cg09331106	RP11-254F7.4	4.43e-25
cg09643350	SLC25A51P1	4.44e-25
cg00365692	SIGLEC17P	4.46e-25
cg03957884	BASP1P1	4.49e-25
cg09107594	OR6F1	4.59e-25
cg18930012	LRIT1	4.6e-25
cg02930239	PRR23C	4.7e-25
cg01975957	LCE1A	4.71e-25
cg15202910	RP11-366H4.1	4.72e-25
cg00202568	RP1	4.79e-25
cg08097817	KRTAP11-1	4.82e-25
cg02795546	OR2C3	4.84e-25
cg02746869	VIM-AS1	5.03e-25
cg03551367	TMEM174	5.07e-25
cg25340966	TBX15	5.09e-25
cg22131172	LINC00346	5.18e-25
cg23314948	FAM170A	5.22e-25
cg24355048	CTSG	5.23e-25
cg17060964	OR5AS1	5.31e-25
cg06155641	GLT6D1	5.37e-25
cg24437737	HIST2H2BB;RP5-998N21.10;RP5-998N21.7;HIST2H3PS2	5.44e-25
cg08867933	MIR1179	5.48e-25
cg17031773	KLK9;KLK9	5.64e-25
cg02928163	RP11-597A11.6	5.76e-25
cg06339135	SLC16A14P1	5.77e-25
cg02868468	C14orf180	5.8e-25
cg16337185	AC012075.2	5.93e-25
cg24154699	AC245036.1	5.96e-25
cg20661138	AF186192.1;AF186192.5	6.04e-25
cg19002591	AC109309.4	6.15e-25
cg12080717	OR11L1	6.15e-25
cg03644984	AC004006.2	6.19e-25
cg21833776	NXPE4	6.28e-25
cg23413497	IGHV3-37	6.28e-25
cg02772823	SLC6A14	6.3e-25
cg19004718	CTC-340A15.1	6.39e-25
cg10479063	PZP	6.78e-25
cg10592710	COL6A5	6.85e-25
cg00242951	LHFPL4	6.87e-25
cg18472549	SLC16A14P1	6.9e-25
cg19539556	OR4A16	7.03e-25
cg24476826	RP11-300A12.2;TUBBP8	7.16e-25
cg25037841	MIR1286	7.18e-25
cg02362103	TBX15	7.22e-25
cg22337977	KRTAP13-5P;KRTAP15-1	7.34e-25
cg07837852	MIR181A1HG	7.35e-25
cg01303032	LINC00836	7.38e-25
cg25000021	AC018685.2	7.42e-25
cg21660040	RP11-608O21.1	7.44e-25
cg08304190	MIR663A	7.44e-25
cg20778958	OR6P1	7.46e-25
cg26919735	LCE2C	7.53e-25
cg16924337	RGS17	7.58e-25
cg25383660	RP11-432M8.8	7.6e-25
cg22026150	PSAT1P1	7.68e-25
cg11638921	RP11-174M13.2	7.7e-25
cg00497078	C14orf180	7.77e-25
cg01712692	RFKP1	7.82e-25
cg11275015	SSX7	7.82e-25
cg19686152	TMOD3	7.91e-25
cg03696126	TERF1P5	7.93e-25
cg03816954	UCMA	7.94e-25
cg17432154	FRG2B	8e-25
cg23390871	INS-IGF2;INS	8.02e-25
cg12820134	RP11-669N7.2	8.09e-25
cg11495377	AC093326.2	8.2e-25
cg05307477	RP11-501J20.3;KCNK18	8.34e-25
cg01515155	OR5L1	8.35e-25
cg26254916	RP11-432M8.13	8.4e-25
cg16204509	ALDH1L2	8.43e-25
cg22853943	LINC01249	8.45e-25
cg27315635	KCNJ9	8.57e-25
cg03100509	TUBA1A	8.61e-25
cg20663846	KRTAP4-8	8.65e-25
cg19554522	RP11-1000B6.8	8.7e-25
cg21757970	RP11-445O3.2	8.71e-25
cg10316270	RBM46	8.76e-25
cg08427717	ICAM1	8.87e-25
cg21071075	FAM8A2P	8.92e-25
cg00234998	MRGPRE	9.16e-25
cg07919028	FGF6	9.21e-25
cg04981409	RP11-393N4.2	9.26e-25
cg10988187	PTPRB	9.23e-25
cg06488443	AC009487.4;AC009487.5;SLC4A10	9.32e-25
cg06924880	PRR23D1	9.42e-25
cg24651828	JAKMIP2	9.34e-25
cg24247673	ANKRD30A	9.44e-25
cg19360104	SHE	9.68e-25
cg18352935	OR51F2	9.71e-25
cg10739728	MAGEC2	9.77e-25
cg14709460	TRIL	9.94e-25
cg22947481	CTC-457E21.7	9.96e-25
cg14588606	KRTAP1-5	1.01e-24
cg08478116	SCG5	1.02e-24
cg07977614	RP11-561I11.4	1.04e-24
cg25214789	MTRR	1.08e-24
cg16174234	CEP89;C19orf40	1.08e-24
cg02412123	SIGLEC9	1.08e-24
cg15396204	RP11-233E12.2	1.1e-24
cg13597417	LGALS9C	1.11e-24
cg16823292	RP3-333A15.2	1.12e-24
cg04650977	MIR489	1.15e-24
cg24432464	OR5BC1P	1.16e-24
cg13651876	CHCHD4P3	1.17e-24
cg20672477	PAX4	1.18e-24
cg12224388	AC093326.2	1.19e-24
cg02586852	RP11-429A20.2	1.2e-24
cg19201533	MIR511	1.22e-24
cg27145042	ARHGAP17;RP11-266L9.1	1.22e-24
cg21038932	HLA-DQB2	1.23e-24
cg02304033	NPS	1.25e-24
cg21521518	RASL11B	1.26e-24
cg22658316	SIGLEC17P	1.28e-24
cg16775110	HMGN2P41	1.29e-24
cg24005701	TRIM64B	1.3e-24
cg24318032	KRT32;RNU2-32P	1.32e-24
cg10790685	VIM	1.32e-24
cg07008343	KRT28	1.35e-24
cg13070632	RP11-368M16.8;RP11-368M16.7	1.34e-24
cg21836699	MIR548I2	1.4e-24
cg23095743	PITX3	1.34e-24
cg03580272	AD000091.2;CYP4F8;CYP4F3	1.35e-24
cg13575682	SMCP	1.37e-24
cg22457668	AF067845.1	1.38e-24
cg22643217	KRTAP11-1	1.39e-24
cg26977737	LINC00320	1.43e-24
cg20821276	HELZ	1.44e-24
cg09508362	TPO	1.48e-24
cg25541968	OR5P3	1.51e-24
cg25502093	ZBED8	1.53e-24
cg15271054	RP11-358D14.2	1.54e-24
cg09558502	OVGP1	1.54e-24
cg00769810	RP11-301M17.1	1.56e-24
cg22820233	FCAR	1.56e-24
cg11015251	HOXA4	1.57e-24
cg01437411	ATN1	1.6e-24
cg14666310	CEACAM7;AC011513.3	1.62e-24
cg09904358	RP11-183E9.2	1.64e-24
cg11613559	PHACTR2P1	1.65e-24
cg17678740	HAUS6P1	1.65e-24
cg23021650	TCHH	1.67e-24
cg17859772	PRPH2	1.67e-24
cg08667275	RP11-334E6.10	1.7e-24
cg24617370	FAM208A	1.75e-24
cg25764899	TAL1	1.82e-24
cg08496953	C17orf104	1.92e-24
cg23241878	CEACAM5	1.93e-24
cg25343618	RP11-284F21.7	1.95e-24
cg06530558	UNC13C	1.96e-24
cg05999628	CCL11	1.97e-24
cg19933709	SLC6A14	2e-24
cg24884142	TBX15	2.02e-24
cg13512032	LINC01561	2.03e-24
cg12424504	AC005062.2;MACC1-AS1	2.03e-24
cg25760325	TRIML1	2.04e-24
cg08448931	MAGEA4	2.07e-24
cg14091531	RP4-597A16.3	2.07e-24
cg11283289	PATE1	2.08e-24
cg16893868	LILRA2;LILRA1	2.08e-24
cg07055879	OR2A5	2.09e-24
cg00089945	RP11-378J18.6	2.09e-24
cg24361256	SELO	2.1e-24
cg22188815	RP11-465I4.3	2.1e-24
cg24316982	SPRR4	2.35e-24
cg18044044	OR7D4	2.39e-24
cg24563094	GAREML	2.4e-24
cg01233744	PATE2	2.41e-24
cg05433557	MIR595	2.43e-24
cg25730098	NLRP4	2.44e-24
cg22933107	RP11-97O12.3	2.45e-24
cg22723502	HIST1H4F	2.5e-24
cg01598642	HBG1	2.52e-24
cg03760191	RP11-573G6.8	2.54e-24
cg22141235	AC109309.4	2.54e-24
cg02096792	TPO	2.55e-24
cg08362283	CTD-2555A7.2	2.59e-24
cg17050941	LINC01105	2.6e-24
cg19606290	MIR520B;MIR518B	2.6e-24
cg00868860	DCD	2.63e-24
cg09258439	OR10A2	2.66e-24
cg12243858	SSPO	2.68e-24
cg19273773	NAPEPLD	2.7e-24
cg13812570	SPANXN1	2.72e-24
cg05372727	LINC00460	2.73e-24
cg02122540	MROH5	2.76e-24
[truncated: 84,140 more rows]

## Sheet: LUAD
probe	gene	adj.P.Val
[truncated: 63,260 more rows]

## Sheet: LUSC
probe	gene	adj.P.Val
[truncated: 114,142 more rows]

[truncated: 3 more sheets: PRAD, THCA, UCEC]
