# Supplementary material for: Characterization of bidirectional gene pairs in The Cancer Genome Atlas (TCGA) dataset
Source: PeerJ. 2019 Jun 17;7:e7107. doi: 10.7717/peerj.7107 (PMC6585903; doi:10.7717/peerj.7107)
Supplement: Supplemental Information 11 [file peerj-07-7107-s011.xlsx]

## Sheet: BG.DFI.BLCA
Gene	Coefficient	Logrank p-value
ENSG00000000419.11	-0.0240674	0.0524293
ENSG00000001561.6	0.0186668	0.257125
ENSG00000001629.8	0.0138564	0.101994
ENSG00000001631.13	0.0350708	0.0151724
ENSG00000002016.15	0.00974168	0.799785
ENSG00000002933.6	-0.00454794	0.40747
ENSG00000003056.6	-0.000940385	0.864745
ENSG00000003147.16	0.00126501	0.829528
ENSG00000003249.12	-0.00330343	0.70428
ENSG00000003509.14	-0.0351179	0.48397
ENSG00000004139.12	0.0545353	0.0774
ENSG00000004142.10	-8.52939e-05	0.980086
ENSG00000004455.15	-0.00379585	0.469158
ENSG00000004478.7	-0.00356772	0.102432
ENSG00000004700.14	0.0160736	0.273673
ENSG00000004776.10	-0.00106124	0.788092
ENSG00000004799.7	0.00484718	0.262065
ENSG00000004961.13	-0.0180594	0.36938
ENSG00000005001.8	0.000349047	0.932173
ENSG00000005022.5	0.000421514	0.737513
ENSG00000005073.5	-0.0295718	0.249493
ENSG00000005100.11	-0.0168974	0.342187
ENSG00000005156.10	0.00686132	0.413516
ENSG00000005175.8	-0.0219888	0.204664
ENSG00000005194.13	0.003711	0.669138
ENSG00000005206.15	-0.00625296	0.411229
ENSG00000005448.15	-0.0106911	0.470249
ENSG00000005469.10	-0.000923771	0.751926
ENSG00000005483.18	0.00344561	0.570288
ENSG00000005513.9	-0.0736113	0.412197
ENSG00000005812.9	0.0147601	0.140811
ENSG00000005884.16	-3.97433e-05	0.917666
ENSG00000005889.14	0.0280305	0.0195354
ENSG00000006016.9	-0.0539866	0.271322
ENSG00000006118.13	0.00329419	0.102419
ENSG00000006125.15	-0.00394818	0.149346
ENSG00000006432.14	0.0220833	0.13612
ENSG00000006459.9	0.0151549	0.138683
ENSG00000006530.14	0.00156265	0.944908
ENSG00000006576.15	0.0193383	0.078579
ENSG00000006634.6	-0.00220553	0.918893
ENSG00000006638.10	-0.00901585	0.934575
ENSG00000006695.9	-0.0270513	0.442583
ENSG00000006712.13	-0.00981976	0.159196
ENSG00000006740.15	0.0336389	0.0143808
ENSG00000006747.13	0.00594269	0.0681307
ENSG00000006837.10	0.416609	0.320949
ENSG00000007001.11	1.21518	0.019548
ENSG00000007255.9	-0.00659101	0.489467
ENSG00000007350.15	0.000378837	0.966266
ENSG00000007376.6	-0.0212075	0.185253
ENSG00000007384.14	-0.00734975	0.31651
ENSG00000007520.3	-0.0104987	0.290465
ENSG00000007545.14	0.00797492	0.73673
ENSG00000008018.8	-0.00130683	0.643261
ENSG00000008128.21	-0.107802	0.0302843
ENSG00000008300.13	0.0129132	0.0262886
ENSG00000008382.14	-0.00872303	0.476662
ENSG00000008405.10	0.00478148	0.844099
ENSG00000008735.13	-0.00216702	0.875638
ENSG00000008869.10	0.0119653	0.351953
ENSG00000008952.15	0.00664279	0.140261
ENSG00000008988.8	-0.000886896	0.050045
ENSG00000009413.14	0.0209039	0.00745919
ENSG00000009830.10	-0.0245538	0.30048
ENSG00000010030.12	-0.0103264	0.346148
ENSG00000010072.14	0.0572306	0.117157
ENSG00000010244.15	0.003889	0.172623
ENSG00000010282.13	-0.651626	0.60787
ENSG00000010292.11	-0.00057097	0.831698
ENSG00000010318.18	0.0751449	0.183027
ENSG00000010361.12	-0.0165557	0.415179
ENSG00000010671.14	-0.066366	0.130999
ENSG00000010803.15	-0.00288155	0.735496
ENSG00000011021.20	-0.0240555	0.452121
ENSG00000011028.12	0.000676048	0.530683
ENSG00000011114.13	0.00498227	0.653569
ENSG00000011132.10	-0.0514092	0.112331
ENSG00000011258.14	0.0235227	0.00322857
ENSG00000011260.12	0.0138686	0.128317
ENSG00000011295.14	-0.00576805	0.635257
ENSG00000011405.12	0.012018	0.213466
ENSG00000011426.9	0.000796421	0.84349
ENSG00000011478.10	-0.0455875	0.0623693
ENSG00000011566.13	0.00296343	0.586807
ENSG00000012048.18	0.0165989	0.170885
ENSG00000012171.16	-0.00378249	0.416115
ENSG00000012660.12	0.000586825	0.873035
ENSG00000012963.12	-0.00294271	0.799196
ENSG00000013016.13	0.00635746	0.0352503
ENSG00000013364.17	-0.000689982	0.599772
ENSG00000013375.14	0.0165047	0.15121
ENSG00000013392.7	0.0800569	0.222174
ENSG00000013523.8	0.0418735	0.0567893
ENSG00000013563.12	0.0249995	0.0981821
ENSG00000013573.15	-0.0161772	0.138629
ENSG00000013583.7	-0.00866806	0.341168
ENSG00000013810.17	-0.0015912	0.51095
ENSG00000014123.9	0.0175487	0.068626
ENSG00000014164.6	-0.0047504	0.705684
ENSG00000015133.17	-0.017885	0.0777711
ENSG00000015153.13	-0.00331362	0.892848
ENSG00000015479.16	0.0310456	0.0380529
ENSG00000016082.13	-0.103621	0.389288
ENSG00000016391.9	0.00730412	0.577927
ENSG00000018189.11	0.0129653	0.496349
ENSG00000018510.11	0.00760173	0.436605
ENSG00000018869.15	-0.0871346	0.430416
ENSG00000020129.14	-0.00433766	0.785593
ENSG00000020922.11	0.00320151	0.853705
ENSG00000021826.13	0.00351114	0.183603
ENSG00000021852.11	-1.51621	0.271693
ENSG00000022840.14	-0.00462527	0.195702
ENSG00000023041.10	-0.00729407	0.591145
ENSG00000023228.12	0.00655721	0.221523
ENSG00000023318.7	-0.00211007	0.67882
ENSG00000023734.9	-0.00670317	0.154107
ENSG00000024526.15	0.0192275	0.222918
ENSG00000024862.15	-0.0134379	0.523529
ENSG00000025423.10	-0.0159113	0.466137
ENSG00000025434.17	-0.0273218	0.0396906
ENSG00000025770.17	-0.00466115	0.588447
ENSG00000025796.12	0.00625443	0.388619
ENSG00000026103.18	-0.0152378	0.283868
ENSG00000026508.15	-0.000265783	0.62028
ENSG00000027001.8	-0.0209914	0.379754
ENSG00000028203.16	-0.019843	0.0725704
ENSG00000028310.16	-0.000799033	0.911798
ENSG00000028528.13	-0.00878037	0.155937
ENSG00000029364.10	0.00930629	0.187766
ENSG00000030419.15	0.00493066	0.308412
ENSG00000031691.6	0.0647376	0.150493
ENSG00000031823.13	-0.00773795	0.42816
ENSG00000032219.17	0.00234622	0.926168
ENSG00000032742.16	-0.000950883	0.982705
ENSG00000033011.10	0.00853616	0.799775
ENSG00000033030.12	-0.0198461	0.365702
ENSG00000033178.11	-0.00216285	0.613975
ENSG00000034533.10	0.106143	0.0267654
ENSG00000034693.13	0.0220443	0.37421
ENSG00000036672.14	-0.0128664	0.748504
ENSG00000037241.6	-0.0143081	0.57212
ENSG00000037474.13	0.000927341	0.80798
ENSG00000037637.9	-0.000152977	0.994943
ENSG00000037749.10	0.0551385	0.00396394
ENSG00000037897.15	-0.00674764	0.721914
ENSG00000038219.11	0.00307834	0.673687
ENSG00000039123.14	-0.00362681	0.611596
ENSG00000039600.9	0.179159	0.231494
ENSG00000039650.8	-0.01256	0.179028
ENSG00000040487.11	-0.00464605	0.81588
ENSG00000040531.13	-0.0269237	0.318521
ENSG00000041880.13	-0.0282017	0.0402273
ENSG00000042088.12	-0.00803022	0.7303
ENSG00000042429.9	-0.0226065	0.298351
ENSG00000042445.12	-0.00653893	0.323114
ENSG00000042493.14	-0.000423195	0.62047
ENSG00000044574.7	0.000356638	0.502758
ENSG00000046604.11	0.000565193	0.606983
ENSG00000046651.13	-0.00152575	0.840414
ENSG00000047056.13	0.0132444	0.592215
ENSG00000047365.10	-0.0118441	0.270901
ENSG00000047410.12	0.00368218	0.209774
ENSG00000047578.11	0.0166417	0.193539
ENSG00000047621.10	-0.0268187	0.378627
ENSG00000048162.18	-0.00365502	0.785107
ENSG00000048392.10	-0.00336823	0.616602
ENSG00000048471.12	0.000488896	0.967528
ENSG00000048649.12	0.0138525	0.0537094
ENSG00000048991.15	-0.00114267	0.945474
ENSG00000049130.12	0.00210022	0.646745
ENSG00000049167.12	-0.0391561	0.688826
ENSG00000049618.20	0.00383818	0.510041
ENSG00000049883.13	0.000347371	0.994751
ENSG00000050130.16	-0.0152094	0.390174
ENSG00000050327.13	0.0069199	0.497995
ENSG00000051009.9	-0.00978087	0.565615
ENSG00000051128.17	-0.00166053	0.700759
ENSG00000051180.15	-0.0430093	0.0707414
ENSG00000051620.9	-0.00297953	0.320158
ENSG00000052749.12	-0.00571649	0.508877
ENSG00000052841.13	0.00482306	0.583375
ENSG00000053371.11	-0.00192686	0.873026
ENSG00000053372.4	-0.00871482	0.257696
ENSG00000053770.10	0.00994757	0.418192
ENSG00000054116.10	-0.00363517	0.749558
ENSG00000054267.19	0.0150931	0.228368
ENSG00000054282.14	-0.022531	0.467188
ENSG00000054611.12	-0.0204396	0.172313
ENSG00000054690.12	0.00418172	0.0559564
ENSG00000055070.15	-0.000877746	0.864378
ENSG00000055130.14	-0.00471489	0.57728
ENSG00000055147.16	0.0830311	0.0240421
ENSG00000055163.17	-0.000263963	0.956337
ENSG00000055609.16	0.0017422	0.116858
ENSG00000055950.15	-0.0162979	0.0936387
ENSG00000056736.8	0.00391854	0.838351
ENSG00000057019.14	0.00668668	0.0104774
ENSG00000057757.8	-0.00791728	0.466522
ENSG00000057935.12	-0.00265609	0.833463
ENSG00000058063.14	0.00185742	0.684676
ENSG00000058272.14	-0.00184128	0.757008
ENSG00000059377.14	-0.0675601	0.0330671
ENSG00000059769.18	-0.0650687	0.200994
ENSG00000060069.15	-0.0205035	0.208195
ENSG00000060491.15	-0.00601165	0.265671
ENSG00000060688.11	-0.00569723	0.643116
ENSG00000060762.17	-0.011951	0.51847
ENSG00000060982.13	-0.00260403	0.399582
ENSG00000061794.11	-0.00664231	0.325765
ENSG00000061938.15	0.000347417	0.890636
ENSG00000062485.17	-0.00392318	0.354123
ENSG00000062650.16	0.00998548	0.0535901
ENSG00000062716.9	-0.00127657	0.37974
ENSG00000062725.8	0.0100323	0.17494
ENSG00000063169.9	-0.0308084	0.147866
ENSG00000063176.14	0.0136923	0.0555677
ENSG00000063177.11	-0.000711504	0.0996864
ENSG00000063245.13	-0.00224749	0.5095
ENSG00000063322.12	-0.016823	0.122188
ENSG00000063854.11	-0.0253047	0.101004
ENSG00000064102.13	-0.00261091	0.779394
ENSG00000064225.11	0.0531428	0.183878
ENSG00000064393.14	0.00698886	0.165193
ENSG00000064419.12	-0.000918854	0.912677
ENSG00000064489.20	0.181585	0.688505
ENSG00000064490.12	0.00104431	0.888552
ENSG00000064607.15	0.00767018	0.415611
ENSG00000064651.12	0.0109245	0.0543258
ENSG00000064692.17	0.0371773	0.18742
ENSG00000064703.10	-0.0174113	0.582668
ENSG00000064726.8	-0.00472187	0.654982
ENSG00000064763.9	0.00759182	0.0366952
ENSG00000064933.15	-0.0139623	0.694693
ENSG00000065000.14	-0.00097875	0.822819
ENSG00000065057.6	-0.0691442	0.0150805
ENSG00000065183.14	-0.00957174	0.361576
ENSG00000065243.17	0.00139857	0.822431
ENSG00000065308.4	0.0112702	0.187237
ENSG00000065325.11	-0.141473	0.455332
ENSG00000065413.15	-0.0507048	0.126241
ENSG00000065427.13	0.000419827	0.881135
ENSG00000065491.8	0.0305991	0.265088
ENSG00000065526.9	0.00459288	0.378095
ENSG00000065559.13	0.00415328	0.792906
ENSG00000065621.13	0.00381477	0.740765
ENSG00000065675.13	-0.0729576	0.144772
ENSG00000065883.13	0.0131223	0.199773
ENSG00000065911.10	-0.0047683	0.293818
ENSG00000066044.12	-0.0170217	0.0388312
ENSG00000066136.18	0.00220723	0.712703
ENSG00000066185.11	-0.119011	0.500102
ENSG00000066230.9	0.0308715	0.0289102
ENSG00000066248.13	0.013758	0.319679
ENSG00000066557.5	-0.0269498	0.463309
ENSG00000066735.13	0.0590523	0.182773
ENSG00000066739.10	0.021359	0.15322
ENSG00000066777.7	0.00369329	0.1631
ENSG00000066923.16	-0.00383533	0.774174
ENSG00000067057.15	-8.24062e-05	0.959751
ENSG00000067064.9	-0.00171271	0.808281
ENSG00000067167.6	0.000118756	0.925589
ENSG00000067221.12	0.0121954	0.545868
ENSG00000067248.8	0.00210944	0.830105
ENSG00000067369.12	0.00271906	0.808506
ENSG00000067560.9	-0.00123136	0.314666
ENSG00000067601.7	0.0905383	0.653708
ENSG00000067606.14	-0.0263632	0.122721
ENSG00000067646.10	-0.0239365	0.293063
ENSG00000068024.15	0.018042	0.409929
ENSG00000068028.16	-0.0399842	0.0289909
ENSG00000068097.13	0.00631317	0.557114
ENSG00000068489.11	0.0110777	0.232014
ENSG00000068650.17	0.00501788	0.268269
ENSG00000068654.14	0.00068275	0.936162
ENSG00000068697.6	-0.00110976	0.510321
ENSG00000068878.13	-0.00516116	0.398022
ENSG00000068885.13	0.0285866	0.273266
ENSG00000068903.18	-0.00254287	0.764821
ENSG00000068912.12	-0.0124985	0.214599
ENSG00000068971.12	-0.0409002	0.0901345
ENSG00000069011.14	0.00354846	0.112017
ENSG00000069248.11	-0.00552058	0.675601
ENSG00000069329.14	-0.00204709	0.502156
ENSG00000069345.10	-0.00100924	0.889072
ENSG00000069812.10	0.0024303	0.375193
ENSG00000069943.8	-0.0138813	0.774775
ENSG00000069974.14	-0.00650317	0.655602
ENSG00000070010.17	-0.0215597	0.0176035
ENSG00000070061.13	0.0175955	0.14307
ENSG00000070081.14	-0.00149663	0.869363
ENSG00000070087.12	0.00063395	0.769951
ENSG00000070193.4	-0.0479699	0.878852
ENSG00000070366.12	0.000787628	0.969354
ENSG00000070367.14	0.00385903	0.659773
ENSG00000070413.17	-0.00370485	0.242876
ENSG00000070423.16	-0.0138142	0.112695
ENSG00000070495.13	-0.0151399	0.37003
ENSG00000070610.13	-0.00486802	0.601432
ENSG00000070614.13	0.00520623	0.106883
ENSG00000070718.10	-0.0192498	0.21612
ENSG00000070761.6	-0.0174553	0.367838
ENSG00000070770.7	0.0043319	0.557332
ENSG00000070961.13	0.000209371	0.94728
ENSG00000071082.9	-0.000645976	0.264921
ENSG00000071189.20	0.017067	0.00291835
ENSG00000071246.9	0.0121482	0.39857
ENSG00000071462.10	-0.00736691	0.118825
ENSG00000071539.12	-0.00158168	0.747569
ENSG00000071553.15	-0.000247762	0.87146
ENSG00000071794.14	0.0145335	0.0329204
ENSG00000071894.13	-0.000322532	0.927906
ENSG00000072110.12	-0.000101621	0.886849
ENSG00000072364.11	0.00420694	0.000602081
ENSG00000072501.16	0.00429706	0.268626
ENSG00000072571.18	0.0175085	0.178404
ENSG00000072682.17	0.00427101	0.375145
ENSG00000072756.15	0.0131071	0.551098
ENSG00000072849.9	-0.0230216	0.108135
ENSG00000072864.11	0.00475629	0.548185
ENSG00000072954.5	-0.0181001	0.565567
ENSG00000073111.12	0.00219989	0.430903
ENSG00000073169.12	-0.00991958	0.396833
ENSG00000073331.16	0.0270869	0.061408
ENSG00000073578.15	-0.00175671	0.476566
ENSG00000073584.17	0.00534059	0.304624
ENSG00000073598.5	3.35247	0.280408
ENSG00000073614.10	0.00814917	0.274532
ENSG00000073756.10	-0.000373765	0.8089
ENSG00000073803.12	0.00227585	0.852377
ENSG00000073910.18	-0.00586927	0.271911
ENSG00000074054.16	0.0222602	0.0337693
ENSG00000074071.12	-0.012383	0.0464663
ENSG00000074219.12	0.00449356	0.280376
ENSG00000074317.9	0.584847	0.0010803
ENSG00000074582.11	-0.0135343	0.495818
ENSG00000074621.12	0.0407312	0.159848
ENSG00000074695.5	0.000438918	0.889829
ENSG00000074755.13	0.00318886	0.710155
ENSG00000074800.12	-0.000126112	0.554234
ENSG00000074803.16	0.733404	0.544931
ENSG00000074855.9	-0.00512879	0.701254
ENSG00000074935.12	-0.0657897	0.202306
ENSG00000075089.8	-0.0514265	0.0502811
ENSG00000075131.8	-0.0241964	0.645453
ENSG00000075188.7	-0.0312659	0.0859318
ENSG00000075218.17	0.0115522	0.458612
ENSG00000075239.12	-0.00780959	0.48828
ENSG00000075303.11	0.021009	0.299927
ENSG00000075336.10	-0.0284701	0.27493
ENSG00000075391.15	0.0275254	0.0041659
ENSG00000075399.11	-0.00390636	0.731336
ENSG00000075643.5	-0.00201898	0.851351
ENSG00000075702.15	0.00301041	0.841849
ENSG00000075790.9	0.00126663	0.84798
ENSG00000075914.11	-0.0177781	0.136003
ENSG00000076053.9	0.0162194	0.440238
ENSG00000076201.13	0.00283144	0.706929
ENSG00000076242.13	-0.0307567	0.0533464
ENSG00000076382.15	0.00328527	0.411941
ENSG00000076513.15	-0.00627919	0.347899
ENSG00000076604.13	-0.000318802	0.874172
ENSG00000076924.10	-0.00271153	0.672487
ENSG00000076944.13	-0.00670612	0.210933
ENSG00000076984.16	-0.0189913	0.2338
ENSG00000077235.16	0.00496191	0.287685
ENSG00000077238.12	-0.0034493	0.210068
ENSG00000077312.7	-0.0104431	0.0868665
ENSG00000077348.7	-0.00365145	0.718585
ENSG00000077458.11	-0.00529018	0.859857
ENSG00000077463.13	-0.0538604	0.00925651
ENSG00000077514.7	0.00188711	0.908524
ENSG00000077800.10	-0.390565	0.863111
ENSG00000077935.15	-0.00707027	0.868459
ENSG00000078114.17	0.00070628	0.881454
ENSG00000078177.12	0.0646014	0.00106552
ENSG00000078246.14	-0.00555869	0.803578
ENSG00000078369.16	-0.00299741	0.0897388
ENSG00000078487.16	-0.0127402	0.788675
ENSG00000078808.15	-0.00330783	0.391087
ENSG00000078900.13	0.0208312	0.125886
ENSG00000078902.14	-0.00277074	0.522282
ENSG00000078967.11	-0.0200828	0.455069
ENSG00000079134.10	-0.0203685	0.174341
ENSG00000079739.14	1.9609e-05	0.996246
ENSG00000080007.7	0.0382333	0.326109
ENSG00000080189.13	-0.00756618	0.2267
ENSG00000080298.14	-0.00453396	0.817372
ENSG00000080546.12	0.0136064	0.119044
ENSG00000080603.15	0.00476361	0.20204
ENSG00000080822.15	0.0108168	0.0626653
ENSG00000080824.17	-1.32574e-05	0.966414
ENSG00000080839.10	0.0115891	0.540228
ENSG00000080986.11	-0.00351565	0.738287
ENSG00000081014.9	0.0123442	0.683184
ENSG00000081019.12	-0.00249081	0.929835
ENSG00000081052.11	0.0101167	0.484047
ENSG00000081087.13	0.0127989	0.234223
ENSG00000081870.10	-0.00821035	0.596112
ENSG00000082213.16	0.00634062	0.587934
ENSG00000082258.11	0.00423924	0.467927
ENSG00000082641.14	0.00235141	0.026997
ENSG00000082701.13	0.0141873	0.00800991
ENSG00000082805.18	0.00247774	0.628809
ENSG00000083093.8	-0.00399737	0.697505
ENSG00000083290.18	-0.000494864	0.971971
ENSG00000083307.9	0.000992387	0.79033
ENSG00000083312.16	0.00181425	0.669059
ENSG00000083520.13	0.0109505	0.138236
ENSG00000083535.14	0.0382959	0.0840805
ENSG00000083635.7	-0.0123696	0.771217
ENSG00000083720.11	0.00404424	0.489986
ENSG00000083799.16	-0.00542462	0.524459
ENSG00000083817.8	0.0588227	0.475553
ENSG00000083937.7	-0.00089409	0.771644
ENSG00000084072.15	-0.015124	0.105998
ENSG00000084073.7	0.000830762	0.876495
ENSG00000084090.12	0.00164366	0.658838
ENSG00000084110.9	0.0329787	0.254059
ENSG00000084463.6	-0.00982314	0.119801
ENSG00000084623.10	-0.00541717	0.0598439
ENSG00000085231.12	-0.0611265	0.10778
ENSG00000085365.16	0.00775682	0.334491
ENSG00000085382.10	0.0380568	0.114608
ENSG00000085491.14	-0.00194547	0.794074
ENSG00000085511.18	0.0144861	0.231266
ENSG00000085721.11	-0.00730969	0.539433
ENSG00000085733.14	-0.00168635	0.196373
ENSG00000085840.11	0.00870562	0.729065
ENSG00000085872.13	-0.00595685	0.602943
ENSG00000086061.14	-0.00240842	0.160713
ENSG00000086062.11	0.000136721	0.913376
ENSG00000086065.12	-0.00762924	0.175592
ENSG00000086189.8	-0.037567	0.0696645
ENSG00000086200.15	-0.0107112	0.676407
ENSG00000086598.9	-0.00175844	0.340358
ENSG00000087206.15	0.0142725	0.533012
ENSG00000087258.12	-0.00749266	0.801338
ENSG00000087263.15	-0.00601878	0.694365
ENSG00000087269.14	-0.00555195	0.45407
ENSG00000087299.10	0.030833	0.277682
ENSG00000087301.7	0.0202002	0.275191
ENSG00000087586.16	-0.00582513	0.53248
ENSG00000087884.13	0.00497349	0.676149
ENSG00000088448.13	-0.000807553	0.850266
ENSG00000088682.12	-0.00192157	0.822303
ENSG00000088727.11	-0.0885043	0.107789
ENSG00000088756.11	0.0272539	0.192503
ENSG00000088766.10	-0.00569818	0.586453
ENSG00000088808.15	0.00134927	0.901526
ENSG00000088836.11	-0.0143087	0.163699
ENSG00000088930.7	0.00300127	0.603802
ENSG00000088986.9	-0.00447301	0.0685514
ENSG00000088992.16	-1.59015e-05	0.995557
ENSG00000089006.15	0.000533478	0.901716
ENSG00000089009.14	-0.0013459	0.0449053
ENSG00000089022.12	-0.034576	0.0670508
ENSG00000089048.13	-0.00383174	0.849202
ENSG00000089053.11	-0.00207619	0.695662
ENSG00000089060.10	-0.0242957	0.0216557
ENSG00000089091.15	0.010462	0.876612
ENSG00000089094.15	-0.0179877	0.237442
ENSG00000089116.3	-0.0401597	0.632665
ENSG00000089157.14	-0.000448681	0.106365
ENSG00000089195.13	-0.000317838	0.982442
ENSG00000089220.4	-0.000611717	0.369863
ENSG00000089225.18	0.0281225	0.667467
ENSG00000089234.14	-0.0286863	0.220876
ENSG00000089248.6	-0.00336496	0.11762
ENSG00000089250.17	0.445474	0.00362234
ENSG00000089335.19	0.0183366	0.0422809
ENSG00000089505.16	0.0727138	0.797522
ENSG00000089737.14	-0.00660626	0.135062
ENSG00000089818.15	-0.0265785	0.159555
ENSG00000089847.11	-0.170041	0.23507
ENSG00000089876.10	-0.00445335	0.737158
ENSG00000090013.8	0.00164644	0.679314
ENSG00000090060.16	6.36174e-05	0.986304
ENSG00000090061.16	-0.00437744	0.911659
ENSG00000090238.10	-0.000984462	0.732761
ENSG00000090273.12	-0.00521009	0.163789
ENSG00000090372.13	-0.00617782	0.20691
ENSG00000090581.8	-0.018075	0.0444691
ENSG00000090861.14	0.00222914	0.252656
ENSG00000090889.11	0.00500668	0.618885
ENSG00000091157.12	0.0308084	0.261692
ENSG00000091164.11	-0.020074	0.02627
ENSG00000091181.18	-1.29709	0.183337
ENSG00000091262.13	0.0430442	0.117276
ENSG00000091428.16	0.0784289	0.00198269
ENSG00000091640.6	-0.0315973	0.0190034
ENSG00000091651.7	-0.0167531	0.415551
ENSG00000092020.9	-0.00494723	0.879203
ENSG00000092094.9	-0.022677	0.280904
ENSG00000092098.15	-0.0277772	0.276361
ENSG00000092201.8	0.00167169	0.635491
ENSG00000092203.12	0.00052728	0.955843
ENSG00000092421.15	0.00381069	0.0943062
ENSG00000092531.8	-0.00316594	0.82186
ENSG00000092841.17	-0.000816095	0.129529
ENSG00000092964.15	2.09261e-05	0.997088
ENSG00000092969.10	-0.0169124	0.523591
ENSG00000092978.9	0.0297209	0.228512
ENSG00000093000.17	0.00940738	0.176571
ENSG00000093009.8	-0.0226335	0.125523
ENSG00000093010.10	-0.00185373	0.23314
ENSG00000093183.12	0.000709611	0.957877
ENSG00000094916.12	0.00584955	0.00222851
ENSG00000095139.12	0.00368678	0.293222
ENSG00000095319.13	0.0062591	0.116486
ENSG00000095321.15	0.000627076	0.65872
ENSG00000095574.10	0.0251295	0.371913
ENSG00000095777.13	0.0136391	0.306622
ENSG00000095787.20	0.00784116	0.0416082
ENSG00000095794.18	-0.0127033	0.467589
ENSG00000096070.18	0.00639379	0.460798
ENSG00000096696.12	0.000157814	0.149672
ENSG00000096872.14	-0.0173639	0.548987
ENSG00000097021.18	0.00156689	0.741668
ENSG00000097033.13	-0.009763	0.0570961
ENSG00000099194.5	5.78404e-05	0.841151
ENSG00000099203.5	0.0168674	0.627923
ENSG00000099256.17	0.0241729	0.0739318
ENSG00000099290.14	0.00716806	0.693841
ENSG00000099326.7	-0.0181196	0.191552
ENSG00000099331.12	-0.00509064	0.31525
ENSG00000099364.15	-0.000162409	0.984654
ENSG00000099381.15	-0.0090187	0.483087
ENSG00000099625.11	-0.082146	0.440993
ENSG00000099715.13	-0.199981	0.700285
ENSG00000099783.10	-0.0029708	0.243974
ENSG00000099840.12	-0.0503782	0.425433
ENSG00000099849.13	-0.00947406	0.0787787
ENSG00000099889.12	-0.0111014	0.277077
ENSG00000099910.15	-0.00490637	0.760026
ENSG00000099917.16	-0.00999896	0.0287997
ENSG00000099940.10	-0.0265641	0.124492
ENSG00000099953.8	0.000224904	0.528605
ENSG00000099968.16	0.000698297	0.932384
ENSG00000099977.12	-0.0227178	0.0661248
ENSG00000099984.9	-0.6036	0.514016
ENSG00000099995.17	-0.00535245	0.293982
ENSG00000100014.18	-0.0267919	0.120419
ENSG00000100024.13	-0.572827	0.346203
ENSG00000100028.10	-0.00739211	0.0958294
ENSG00000100029.16	-0.00234557	0.567096
ENSG00000100077.13	-0.0203882	0.140724
ENSG00000100084.13	-0.0604675	0.0669528
ENSG00000100099.19	0.000986122	0.908044
ENSG00000100100.11	0.00225701	0.493449
ENSG00000100104.11	-0.0331509	0.350096
ENSG00000100105.16	-0.00389731	0.468245
ENSG00000100109.15	0.00232845	0.869189
ENSG00000100124.11	-0.0297749	0.122616
ENSG00000100129.16	-0.00177265	0.588676
ENSG00000100209.8	-0.0426522	0.213479
ENSG00000100211.9	-0.0246522	0.101156
ENSG00000100216.5	-0.0132101	0.0579467
ENSG00000100218.10	0.163166	0.70555
ENSG00000100227.16	-0.00134784	0.861088
ENSG00000100228.11	-0.00500687	0.831709
ENSG00000100258.16	-0.00515865	0.226115
ENSG00000100263.12	-0.00276216	0.819881
ENSG00000100284.19	-0.00440109	0.484738
ENSG00000100288.18	-0.00299003	0.929516
ENSG00000100312.9	-2.58342	0.27586
ENSG00000100314.3	-0.0013207	0.967487
ENSG00000100319.12	-0.0318688	0.247305
ENSG00000100345.19	-0.000150536	0.651048
ENSG00000100354.19	0.0170744	0.0111746
ENSG00000100380.11	-0.00455852	0.143856
ENSG00000100410.6	-0.0142682	0.427282
ENSG00000100412.14	0.00211033	0.699816
ENSG00000100418.7	-0.0100749	0.305835
ENSG00000100439.9	-0.00421212	0.566699
ENSG00000100442.9	-0.00745663	0.393354
ENSG00000100461.16	-0.00493727	0.59918
ENSG00000100462.14	-0.000221674	0.976389
ENSG00000100523.13	0.0215186	0.050672
ENSG00000100554.10	0.00247056	0.744312
ENSG00000100565.14	-0.214253	0.898751
ENSG00000100575.12	-0.0214932	0.294098
ENSG00000100577.17	0.00507404	0.713062
ENSG00000100578.13	-0.0124058	0.599165
ENSG00000100580.7	-0.00223647	0.867372
ENSG00000100583.4	0.0781425	0.683089
ENSG00000100591.6	-0.00532638	0.208887
ENSG00000100601.8	-0.107733	0.0670751
ENSG00000100603.12	-0.00701972	0.375807
ENSG00000100632.9	-0.00700443	0.191984
ENSG00000100644.15	0.000831814	0.492005
ENSG00000100697.13	0.00608771	0.343218
ENSG00000100711.12	-0.00819148	0.380564
ENSG00000100731.14	0.00880141	0.217242
ENSG00000100744.13	0.00519772	0.762507
ENSG00000100784.8	0.0183068	0.244866
ENSG00000100811.9	0.000616985	0.908273
ENSG00000100813.13	-0.00595407	0.144122
ENSG00000100823.10	-0.00358176	0.38705
ENSG00000100852.11	0.00765885	0.00162311
ENSG00000100865.13	-0.0126477	0.409164
ENSG00000100883.10	-0.00414184	0.706179
ENSG00000100890.14	0.0771172	0.411714
ENSG00000100897.16	-0.00255424	0.686736
ENSG00000100911.12	-0.00432551	0.0153052
ENSG00000100916.12	0.0371436	0.39498
ENSG00000100938.16	-0.0112542	0.29453
ENSG00000100941.7	-0.00236862	0.681534
ENSG00000101076.15	0.00278222	0.148643
ENSG00000101079.19	-0.0100127	0.386407
ENSG00000101109.10	-0.00600783	0.452645
ENSG00000101126.14	0.00266903	0.485421
ENSG00000101138.10	-0.000953692	0.955661
ENSG00000101144.11	0.000746335	0.857255
ENSG00000101150.16	-0.00385826	0.249993
ENSG00000101182.13	-0.00361906	0.136037
ENSG00000101187.14	-0.0119672	0.250707
ENSG00000101191.15	0.00341921	0.657883
ENSG00000101193.7	-0.00395877	0.423876
ENSG00000101198.13	-0.21483	0.314023
ENSG00000101199.11	-0.00241989	0.542843
ENSG00000101216.9	0.00617937	0.775986
ENSG00000101224.16	0.00113326	0.464161
ENSG00000101246.18	-0.00686839	0.359142
ENSG00000101247.16	-0.0498684	0.200903
ENSG00000101290.12	0.00436086	0.612548
ENSG00000101346.10	0.0051021	0.0213657
ENSG00000101365.19	-0.00982288	0.137468
ENSG00000101407.11	0.00222025	0.838436
ENSG00000101413.10	-0.00182684	0.832958
ENSG00000101421.3	-0.000247574	0.881343
ENSG00000101425.11	-1.98714	0.194309
ENSG00000101452.13	-0.0341838	0.410358
ENSG00000101457.11	-0.0123545	0.259496
ENSG00000101470.8	0.034393	0.544122
ENSG00000101473.15	-0.0155948	0.372212
ENSG00000101493.9	0.00559494	0.758802
ENSG00000101546.11	-0.00560891	0.792404
ENSG00000101574.13	-0.0837423	0.0280215
ENSG00000101596.13	-0.0108409	0.125402
ENSG00000101608.11	-0.00285035	0.0900228
ENSG00000101639.17	0.0134798	0.175337
ENSG00000101654.16	0.000293293	0.980345
ENSG00000101745.14	0.00323542	0.676685
ENSG00000101746.14	0.0211872	0.498677
ENSG00000101751.9	0.0165667	0.276032
ENSG00000101752.10	0.0119794	0.0820591
ENSG00000101843.17	-0.0134407	0.341364
ENSG00000101844.16	0.0115863	0.757804
ENSG00000101850.11	0.110831	0.000685464
ENSG00000101955.13	-0.00120019	0.888353
ENSG00000101986.11	0.00129962	0.860643
ENSG00000101997.11	-0.0149706	0.443804
ENSG00000102081.12	0.00368365	0.630445
ENSG00000102103.14	-0.00528616	0.446681
ENSG00000102125.14	-0.00886742	0.465639
ENSG00000102312.19	-0.0111439	0.64321
ENSG00000102317.16	0.000804166	0.691765
ENSG00000102393.8	-0.00637294	0.565987
ENSG00000102471.12	0.00642813	0.0299597
ENSG00000102531.15	0.0112731	0.0378692
ENSG00000102547.17	0.00348073	0.264841
ENSG00000102572.13	0.00260123	0.34903
ENSG00000102580.13	0.00822776	0.0724658
ENSG00000102753.8	0.00881939	0.279932
ENSG00000102755.9	0.00519247	0.0734961
ENSG00000102786.13	0.024845	0.0320495
ENSG00000102796.9	0.0104345	0.746738
ENSG00000102871.14	-0.00453755	0.644261
ENSG00000102897.8	0.00316848	0.813517
ENSG00000102900.11	-0.00557427	0.508081
ENSG00000102904.13	0.0874075	0.257456
ENSG00000102921.6	0.00638177	0.16137
ENSG00000102974.13	0.0120376	0.253939
ENSG00000102977.12	-0.00359172	0.808888
ENSG00000102981.8	-0.0348527	0.360286
ENSG00000103005.10	-0.00464012	0.45114
ENSG00000103023.10	-0.162872	0.796267
ENSG00000103035.9	0.00653861	0.208466
ENSG00000103051.17	0.002475	0.525888
ENSG00000103061.10	0.0904739	0.0766879
ENSG00000103145.9	-0.00516816	0.403841
ENSG00000103152.10	-0.0109336	0.459773
ENSG00000103160.10	0.0105257	0.579427
ENSG00000103174.10	-0.0470948	0.156178
ENSG00000103197.15	-0.00599234	0.529154
ENSG00000103227.17	0.00164839	0.937635
ENSG00000103248.16	0.00136128	0.946806
ENSG00000103253.16	-0.0943202	0.0947408
ENSG00000103266.9	-0.0236026	0.121412
ENSG00000103275.17	-0.0143863	0.0091688
ENSG00000103326.9	-0.0106762	0.162134
ENSG00000103343.11	-0.00872169	0.908417
ENSG00000103353.14	-0.00134607	0.841104
ENSG00000103356.14	-0.0075538	0.488817
ENSG00000103363.13	-0.00213205	0.324419
ENSG00000103423.12	-0.00343365	0.743748
ENSG00000103429.9	-0.0073265	0.422053
ENSG00000103494.11	0.0406017	0.318896
ENSG00000103502.12	-0.000761452	0.875849
ENSG00000103549.20	0.00666708	0.410413
ENSG00000103591.11	-0.012155	0.241183
ENSG00000103599.18	0.205266	0.0360783
ENSG00000103671.8	-0.0285903	0.247856
ENSG00000103710.9	-0.000986173	0.943472
ENSG00000103852.11	0.0154064	0.541478
ENSG00000103942.11	0.0185201	0.0742487
ENSG00000103966.8	-0.00438092	0.259749
ENSG00000103978.14	-0.00572099	0.327363
ENSG00000103994.15	0.00781554	0.317804
ENSG00000103995.12	0.0470104	0.273728
ENSG00000104043.13	-0.0707193	0.365684
ENSG00000104047.13	-0.0587092	0.172261
ENSG00000104064.15	-0.0251643	0.277457
ENSG00000104129.8	-0.070767	0.0325792
ENSG00000104131.11	-0.0122306	0.14422
ENSG00000104140.6	0.00153948	0.513477
ENSG00000104147.7	-0.0568285	0.377
ENSG00000104164.9	-0.00635467	0.586309
ENSG00000104228.11	0.00122441	0.960199
ENSG00000104231.9	0.00846082	0.462616
ENSG00000104299.13	-0.0292737	0.277751
ENSG00000104312.7	-0.0298045	0.0208887
ENSG00000104356.9	0.0151323	0.429606
ENSG00000104365.12	-0.00844308	0.269627
ENSG00000104369.4	-7.38609e-05	0.996864
ENSG00000104375.14	0.0209477	0.0445678
ENSG00000104381.11	0.0126921	0.478897
ENSG00000104388.13	-0.00307665	0.369513
ENSG00000104490.16	-0.00641472	0.760904
ENSG00000104549.10	-0.000691163	0.772969
ENSG00000104643.8	0.0325208	0.375054
ENSG00000104671.6	-0.0176395	0.419781
ENSG00000104689.8	-0.0318965	0.198777
ENSG00000104714.12	-0.00246179	0.928071
ENSG00000104722.12	0.0106508	0.290765
ENSG00000104738.15	-0.000431969	0.835058
ENSG00000104756.14	0.00412036	0.751383
ENSG00000104763.16	-0.000226389	0.85552
ENSG00000104765.13	-0.00250576	0.567728
ENSG00000104774.11	-0.010485	0.0667229
ENSG00000104812.13	-0.00290963	0.623616
ENSG00000104814.11	-0.0314525	0.192435
ENSG00000104825.15	-0.0102023	0.351443
ENSG00000104835.13	-0.0599982	0.166743
ENSG00000104853.14	-0.00678722	0.0606963
ENSG00000104872.9	-0.0201615	0.0157013
ENSG00000104880.16	-0.0188296	0.585751
ENSG00000104881.13	-0.00280327	0.265856
ENSG00000104885.16	0.00693137	0.468453
ENSG00000104892.15	0.00539606	0.613361
ENSG00000104897.8	-0.00638364	0.257216
ENSG00000104901.5	0.0414501	0.833288
ENSG00000104904.11	-0.00191693	0.0669944
ENSG00000104907.11	-0.00463197	0.494622
ENSG00000104915.13	-0.0123247	0.209483
ENSG00000104946.9	-0.0206832	0.107992
ENSG00000104951.14	-0.0257276	0.109908
ENSG00000104960.14	-0.00539458	0.0983653
ENSG00000104973.13	-0.0185961	0.0242591
ENSG00000104979.7	-0.00893231	0.0461821
ENSG00000104998.3	0.0050347	0.55591
ENSG00000105011.7	-0.00148851	0.843481
ENSG00000105053.9	-0.036571	0.0539492
ENSG00000105072.7	-0.0294911	0.679351
ENSG00000105127.7	0.00401971	0.74526
ENSG00000105193.7	-0.00141562	0.0185114
ENSG00000105220.13	-0.000762057	0.411117
ENSG00000105223.17	0.000386213	0.765313
ENSG00000105248.14	-0.041962	0.048111
ENSG00000105281.11	-0.00165713	0.211564
ENSG00000105376.4	-0.0432205	0.574139
ENSG00000105392.14	2.20216	0.453277
ENSG00000105443.12	-0.00625377	0.176219
ENSG00000105467.7	-0.0560327	0.746949
ENSG00000105479.14	0.161432	0.163914
ENSG00000105483.15	-0.0114272	0.535981
ENSG00000105486.12	-0.0228564	0.00984503
ENSG00000105516.9	0.0198996	0.138737
ENSG00000105550.7	-1.35214	0.659103
ENSG00000105612.7	0.00077635	0.860767
ENSG00000105618.12	-0.016711	0.0329461
ENSG00000105619.12	-0.0137582	0.33313
ENSG00000105641.3	-0.0565297	0.552265
ENSG00000105649.8	-0.112326	0.249156
ENSG00000105669.11	-0.00570997	0.106024
ENSG00000105671.10	-0.0044535	0.594898
ENSG00000105676.12	0.00185501	0.887619
ENSG00000105677.10	-0.00492279	0.198748
ENSG00000105696.7	-0.0737668	0.715955
ENSG00000105705.14	0.00169652	0.921153
ENSG00000105723.10	-0.0149202	0.0332434
ENSG00000105738.9	0.00309814	0.599259
ENSG00000105778.16	0.0125005	0.0126084
ENSG00000105810.8	0.00289578	0.418644
ENSG00000105821.13	-0.00858818	0.506337
ENSG00000105825.10	-7.06486e-05	0.95308
ENSG00000105835.10	-0.00386791	0.123674
ENSG00000105879.10	0.00118038	0.940606
ENSG00000105968.17	-0.00143111	0.680922
ENSG00000105971.13	0.0042024	0.0141834
ENSG00000105982.15	0.392179	0.00154403
ENSG00000105991.7	-0.00392111	0.862667
ENSG00000106028.9	-0.00960488	0.178307
ENSG00000106031.7	0.000101148	0.991007
ENSG00000106080.9	0.0195035	0.263329
ENSG00000106086.17	0.0560514	0.0313757
ENSG00000106105.12	-0.00193373	0.418599
ENSG00000106144.18	0.00914778	0.240287
ENSG00000106244.11	-0.0013372	0.706542
ENSG00000106245.8	-0.0126481	0.232061
ENSG00000106263.16	-0.00132511	0.441192
ENSG00000106266.7	-0.00183659	0.834304
ENSG00000106268.14	-0.00316169	0.777977
ENSG00000106290.13	-0.00437047	0.749626
ENSG00000106299.7	0.00201939	0.661017
ENSG00000106305.8	0.00195623	0.896307
ENSG00000106344.7	0.0122889	0.468409
ENSG00000106355.8	-0.014657	0.250442
ENSG00000106397.10	-0.00440309	0.349381
ENSG00000106400.10	-0.00257474	0.558211
ENSG00000106459.13	0.0158307	0.673441
ENSG00000106524.7	0.0157692	0.340144
ENSG00000106538.8	-0.00461215	0.15811
ENSG00000106546.11	-0.000178621	0.867672
ENSG00000106554.10	-0.0140624	0.247335
ENSG00000106565.16	-0.00507466	0.162785
ENSG00000106588.9	-0.0288427	0.142842
ENSG00000106591.3	-0.0206739	0.125682
ENSG00000106608.15	-0.0106503	0.479862
ENSG00000106610.13	0.0102051	0.841293
ENSG00000106617.12	0.0123589	0.492261
ENSG00000106692.12	0.053061	0.00443295
ENSG00000106733.19	-0.0053115	0.646816
ENSG00000106803.8	-0.00628672	0.27289
ENSG00000106993.10	-0.0327585	0.170109
ENSG00000107099.14	-0.00738959	0.265161
ENSG00000107175.9	-0.0129866	0.171954
ENSG00000107185.9	0.0034717	0.692834
ENSG00000107262.15	-0.00166895	0.452376
ENSG00000107282.6	0.0572934	0.00667929
ENSG00000107362.12	0.00894453	0.576456
ENSG00000107371.11	-0.011396	0.476205
ENSG00000107485.14	-0.000264818	0.722135
ENSG00000107551.19	-0.0165622	0.0673438
ENSG00000107560.9	0.0100074	0.348437
ENSG00000107651.11	-0.0026471	0.833666
ENSG00000107669.16	0.00667175	0.564986
ENSG00000107758.14	-0.00135325	0.888985
ENSG00000107779.10	0.0305548	0.0144987
ENSG00000107796.11	-0.000186046	0.641614
ENSG00000107798.16	-0.00118395	0.764156
ENSG00000107807.11	0.0112708	0.622871
ENSG00000107815.6	-0.0154368	0.579829
ENSG00000107819.12	-0.00395646	0.59155
ENSG00000107821.13	-0.0243919	0.435512
ENSG00000107854.5	0.00527407	0.387396
ENSG00000107864.13	-0.00174527	0.982834
ENSG00000107897.17	0.00501347	0.373179
ENSG00000107937.17	-0.00411311	0.484582
ENSG00000107938.16	0.0280967	0.376916
ENSG00000107949.15	-0.0123964	0.1813
ENSG00000107984.8	-0.0020002	0.458414
ENSG00000108061.10	-0.0022169	0.887114
ENSG00000108107.11	-0.000724786	0.0354121
ENSG00000108306.10	0.00415749	0.498233
ENSG00000108312.13	0.00186182	0.745579
ENSG00000108342.11	-0.00272471	0.780923
ENSG00000108379.8	0.0242009	0.0953607
ENSG00000108384.13	-0.00839067	0.702422
ENSG00000108395.12	0.0157524	0.0398008
ENSG00000108423.13	-0.00447592	0.922887
ENSG00000108424.8	0.00109739	0.59919
ENSG00000108433.14	0.0272154	0.115473
ENSG00000108439.8	0.0190516	0.00826862
ENSG00000108443.12	0.00509618	0.602677
ENSG00000108469.13	0.00493462	0.347526
ENSG00000108474.15	-0.0210652	0.556904
ENSG00000108509.19	-0.0218545	0.0717364
ENSG00000108515.16	-0.128748	0.0900515
ENSG00000108518.7	-0.00199307	0.00268004
ENSG00000108523.14	-0.0113773	0.0512293
ENSG00000108528.12	-0.0199624	0.036946
ENSG00000108559.10	-0.0137475	0.260633
ENSG00000108590.9	-0.0589372	0.440138
ENSG00000108641.13	0.0455941	0.116922
ENSG00000108666.8	0.0174948	0.0656808
ENSG00000108733.8	0.0680973	0.195254
ENSG00000108759.3	0.549334	0.000792524
ENSG00000108773.9	-0.00282663	0.515981
ENSG00000108774.13	-0.000570078	0.918386
ENSG00000108798.7	-0.0402901	0.0983349
ENSG00000108825.16	-0.011861	0.988133
ENSG00000108826.14	-0.000147937	0.979099
ENSG00000108828.14	-0.000721611	0.690479
ENSG00000108830.9	0.00588031	0.91637
ENSG00000108839.10	0.00586196	0.78183
ENSG00000108883.11	0.00402865	0.363169
ENSG00000109046.13	-0.000474704	0.865521
ENSG00000109062.8	0.00232012	0.315857
ENSG00000109065.10	0.00341677	0.706351
ENSG00000109066.12	0.0162388	0.183299
ENSG00000109072.12	-0.0804055	0.154754
ENSG00000109079.8	0.00424597	0.272764
ENSG00000109083.12	-0.00282651	0.793209
ENSG00000109111.13	0.00492469	0.0320329
ENSG00000109113.16	0.000789793	0.820674
ENSG00000109189.11	0.00703887	0.579892
ENSG00000109320.10	-0.00454471	0.470639
ENSG00000109332.18	2.40211e-05	0.992592
ENSG00000109339.17	0.014256	0.0852343
ENSG00000109436.7	0.00419641	0.36997
ENSG00000109466.12	0.0174805	0.247071
ENSG00000109475.15	-0.000558642	0.417804
ENSG00000109534.15	0.00399128	0.695364
ENSG00000109536.10	0.00402688	0.803935
ENSG00000109572.12	0.00255399	0.314485
ENSG00000109586.10	0.0121861	0.0376812
ENSG00000109618.10	0.0339523	0.351364
ENSG00000109670.12	0.0167345	0.45975
ENSG00000109684.13	-0.67728	0.0879346
ENSG00000109736.13	-0.0015046	0.537028
ENSG00000109771.14	0.152595	0.0168596
ENSG00000109775.9	0.0224543	0.280201
ENSG00000109787.11	0.0010812	0.741291
ENSG00000109805.8	0.00288707	0.798864
ENSG00000109814.10	-0.00578314	0.348279
ENSG00000109832.11	-0.127667	0.81424
ENSG00000109911.16	-0.023807	0.482658
ENSG00000110025.11	-0.0819957	0.767479
ENSG00000110031.11	-0.0410519	0.0438477
ENSG00000110046.11	-0.0187647	0.187459
ENSG00000110048.10	-0.00312857	0.606811
ENSG00000110060.7	0.0134528	0.691957
ENSG00000110063.7	0.00180705	0.919932
ENSG00000110074.9	0.00929432	0.525657
ENSG00000110080.17	-0.00257016	0.222584
ENSG00000110104.10	0.00462171	0.47788
ENSG00000110107.7	-0.00263848	0.448805
ENSG00000110108.8	-0.00479981	0.238787
ENSG00000110172.10	0.00492272	0.654317
ENSG00000110315.5	-0.00562196	0.560834
ENSG00000110321.14	-0.000420084	0.510662
ENSG00000110367.10	0.0053348	0.117095
ENSG00000110375.2	-5.51011e-05	0.86962
ENSG00000110400.9	0.00045414	0.387846
ENSG00000110429.12	-0.0138446	0.40252
ENSG00000110435.10	-0.0296574	0.167389
ENSG00000110536.12	-0.010092	0.678758
ENSG00000110660.13	-0.0170797	0.190996
ENSG00000110713.14	-0.00253911	0.643133
ENSG00000110717.9	-0.00554798	0.164603
ENSG00000110721.10	-0.00888735	0.254835
ENSG00000110756.16	-0.0281851	0.203476
ENSG00000110768.10	-0.0129196	0.400097
ENSG00000110844.12	-0.00264802	0.933896
ENSG00000110871.13	0.0114447	0.513914
ENSG00000110888.16	-0.0117689	0.354871
ENSG00000110906.11	-0.00175371	0.812744
ENSG00000110921.10	-0.0130145	0.203881
ENSG00000110944.7	-0.00785286	0.795546
ENSG00000110987.7	-0.0102778	0.439385
ENSG00000111011.16	-0.00864562	0.346862
ENSG00000111058.6	0.01682	0.372115
ENSG00000111110.10	0.0151666	0.0225706
ENSG00000111199.9	-0.00617892	0.653727
ENSG00000111203.10	-0.0419509	0.0733796
ENSG00000111206.11	-0.0011716	0.800965
ENSG00000111215.10	0.196548	0.044955
ENSG00000111231.7	-0.0449294	0.0908088
ENSG00000111237.17	-0.0236978	0.0100278
ENSG00000111247.13	-0.0132128	0.55593
ENSG00000111254.6	0.180329	0.130536
ENSG00000111271.13	-0.00322296	0.787044
ENSG00000111358.12	-0.00856052	0.594385
ENSG00000111361.11	-0.00954969	0.410682
ENSG00000111412.5	0.000187095	0.982344
ENSG00000111432.4	0.00945391	0.402935
ENSG00000111481.8	-0.00492361	0.221417
ENSG00000111540.14	-0.00151716	0.589318
ENSG00000111596.10	-0.00167397	0.733244
ENSG00000111639.6	-0.0116825	0.0289669
ENSG00000111640.13	-0.000226148	0.0784858
ENSG00000111647.11	0.0151657	0.327924
ENSG00000111653.18	-0.0177738	0.257079
ENSG00000111665.10	-0.0159984	0.171064
ENSG00000111666.9	-0.0025274	0.608358
ENSG00000111667.12	-0.00835832	0.0785464
ENSG00000111696.10	-0.020388	0.494445
ENSG00000111707.10	-0.00779554	0.327366
ENSG00000111711.8	0.00188598	0.821014
ENSG00000111725.9	-0.0184617	0.171039
ENSG00000111727.10	0.0383419	0.294985
ENSG00000111737.10	0.000332478	0.971915
ENSG00000111785.17	-0.0144205	0.765055
ENSG00000111786.7	-0.00529829	0.36689
ENSG00000111790.12	-0.0111882	0.525294
ENSG00000111802.12	-0.0168492	0.152366
ENSG00000111817.15	0.000847842	0.858899
ENSG00000111845.4	-0.0324125	0.105576
ENSG00000111877.16	0.0364009	0.213732
ENSG00000111880.14	-0.00637546	0.744598
ENSG00000111897.6	0.00405516	0.295695
ENSG00000111913.14	-0.00679915	0.583359
ENSG00000112029.8	0.0204375	0.376287
ENSG00000112078.12	0.00423438	0.637638
ENSG00000112110.8	-0.00881118	0.383072
ENSG00000112237.11	0.0151325	0.0974304
ENSG00000112249.12	0.00749349	0.154099
ENSG00000112276.12	-0.0198789	0.459602
ENSG00000112282.16	0.0106877	0.511468
ENSG00000112290.11	0.00097855	0.946519
ENSG00000112293.13	0.040438	0.195977
ENSG00000112294.11	0.00339703	0.23444
ENSG00000112304.9	-0.00495033	0.643942
ENSG00000112333.10	0.355441	0.000638968
ENSG00000112367.9	-0.0239718	0.198131
ENSG00000112425.12	-0.0392848	0.584137
ENSG00000112473.15	-0.000182015	0.929163
ENSG00000112530.10	-0.0866998	0.27732
ENSG00000112531.15	0.00451702	0.140366
ENSG00000112541.12	-0.0129329	0.109498
ENSG00000112576.11	-0.00412443	0.310592
ENSG00000112578.8	-0.0215721	0.129819
ENSG00000112592.11	0.00608845	0.874817
ENSG00000112624.11	-0.0118008	0.595576
ENSG00000112697.14	0.00190174	0.490956
ENSG00000112699.9	-0.0261283	0.058397
ENSG00000112739.15	-0.0125389	0.116021
ENSG00000112855.13	-0.0159173	0.285181
ENSG00000112877.7	0.00438168	0.816489
ENSG00000112902.10	0.000694893	0.604784
ENSG00000112977.14	-0.000477992	0.725442
ENSG00000112983.16	0.0145772	0.203996
ENSG00000112984.10	0.00757008	0.228577
ENSG00000112992.15	0.00811942	0.037941
ENSG00000112996.8	0.00775068	0.479757
ENSG00000113048.15	-0.0132961	0.179958
ENSG00000113141.14	-0.0057734	0.405189
ENSG00000113161.14	0.00124568	0.801082
ENSG00000113163.14	0.00597887	0.612809
ENSG00000113248.5	-0.0451198	0.408417
ENSG00000113263.11	-0.0802082	0.0844889
ENSG00000113296.13	-0.00338702	0.862095
ENSG00000113318.9	-0.0132345	0.650903
ENSG00000113319.10	0.0233394	0.411599
ENSG00000113328.17	0.00333861	0.32172
ENSG00000113360.15	0.00515232	0.298206
ENSG00000113368.10	2.54567e-06	0.999519
ENSG00000113384.12	0.00202335	0.540464
ENSG00000113407.12	-0.000675813	0.816733
ENSG00000113430.8	0.019126	0.121034
ENSG00000113441.14	0.00654675	0.22296
ENSG00000113522.12	0.00830198	0.24548
ENSG00000113525.8	0.165135	0.875266
ENSG00000113575.8	0.00233065	0.539901
ENSG00000113593.10	-0.0232242	0.345405
ENSG00000113615.11	0.0277238	0.0315296
ENSG00000113648.15	-0.00108001	0.668749
ENSG00000113712.15	0.00511055	0.0727734
ENSG00000113734.16	-0.0933464	0.105768
ENSG00000113761.10	0.0687836	0.103028
ENSG00000113790.9	0.0176723	0.0424809
ENSG00000113810.14	0.00707716	0.143255
ENSG00000113845.8	0.000701091	0.909396
ENSG00000113946.3	0.0189539	0.143446
ENSG00000113971.17	-0.0340358	0.500404
ENSG00000114023.14	-9.6662e-05	0.958468
ENSG00000114209.13	0.0076911	0.525485
ENSG00000114302.14	0.00935879	0.275599
ENSG00000114388.11	-0.0115909	0.455975
ENSG00000114395.9	-0.0185084	0.337333
ENSG00000114473.12	0.0127503	0.150854
ENSG00000114487.8	-0.836791	0.683372
ENSG00000114503.9	0.000857165	0.849774
ENSG00000114573.8	0.00917695	0.164025
ENSG00000114648.10	-0.0216567	0.418502
ENSG00000114670.12	0.0524154	0.192152
ENSG00000114737.14	-0.00899243	0.673775
ENSG00000114738.9	-0.00854736	0.313269
ENSG00000114739.12	-5.44757e-05	0.992861
ENSG00000114745.12	-0.00470427	0.528222
ENSG00000114767.6	-0.0246957	0.0899133
ENSG00000114779.18	-0.0037253	0.429493
ENSG00000114784.3	-0.0272799	0.105383
ENSG00000114790.11	0.0319826	0.201
ENSG00000114853.12	0.00511832	0.798599
ENSG00000114857.16	0.000270651	0.939848
ENSG00000114859.13	-0.00525871	0.849175
ENSG00000114861.17	0.0080762	0.0456379
ENSG00000114923.15	0.0125008	0.423219
ENSG00000114942.12	-0.00274847	0.113077
ENSG00000114982.16	0.00162874	0.887251
ENSG00000115020.15	0.0261407	0.0756346
ENSG00000115073.7	-0.00196857	0.819852
ENSG00000115091.10	-0.0032536	0.140231
ENSG00000115128.6	-0.0113945	0.122121
ENSG00000115137.10	0.0758281	0.3374
ENSG00000115170.12	0.0148738	0.244923
ENSG00000115194.9	-0.0313396	0.801308
ENSG00000115207.12	-0.00775355	0.374661
ENSG00000115211.14	-0.0307266	0.0958263
ENSG00000115233.10	-0.00074296	0.908745
ENSG00000115234.9	-0.00230327	0.712361
ENSG00000115239.20	-0.298212	0.121847
ENSG00000115255.9	-0.00092583	0.814736
ENSG00000115257.14	0.000341732	0.995028
ENSG00000115267.5	-3.68323e-05	0.992897
ENSG00000115271.9	0.0017163	0.916567
ENSG00000115282.18	-0.0186767	0.41501
ENSG00000115295.18	0.00717872	0.450495
ENSG00000115307.15	-0.00454524	0.107818
ENSG00000115317.10	-0.021563	0.309095
ENSG00000115339.12	0.00288479	0.551431
ENSG00000115365.10	0.00615648	0.415617
ENSG00000115392.10	-0.0249138	0.192537
ENSG00000115414.17	5.14159e-05	0.294731
ENSG00000115415.17	-0.000891741	0.129729
ENSG00000115446.10	0.00132356	0.957153
ENSG00000115459.16	-0.00662272	0.764417
ENSG00000115464.13	0.00915132	0.0642706
ENSG00000115484.13	-0.00286459	0.255305
ENSG00000115486.10	0.00732759	0.385263
ENSG00000115525.15	-0.00329039	0.348341
ENSG00000115568.14	-0.00712884	0.77618
ENSG00000115661.12	-0.0142502	0.508697
ENSG00000115685.13	-0.013625	0.12641
ENSG00000115687.12	-0.00598733	0.714222
ENSG00000115758.11	-0.000732687	0.691581
ENSG00000115761.14	-0.0141341	0.296031
ENSG00000115816.12	0.00182128	0.86143
ENSG00000115825.8	0.00455216	0.572716
ENSG00000115827.12	0.0364571	0.197753
ENSG00000115840.12	0.00211647	0.90736
ENSG00000115844.9	0.218333	0.000405582
ENSG00000115866.9	-0.00364086	0.576119
ENSG00000115875.17	-0.0142378	0.0192845
ENSG00000115942.7	0.00710576	0.728032
ENSG00000115946.6	-0.0152847	0.409957
ENSG00000115947.12	0.0479249	0.0352955
ENSG00000115956.9	-0.0164463	0.13102
ENSG00000115966.15	0.0235219	0.14084
ENSG00000116044.14	-0.000645661	0.829252
ENSG00000116133.10	0.00115128	0.0432989
ENSG00000116138.11	0.00840841	0.572786
ENSG00000116151.12	0.0119435	0.838364
ENSG00000116171.15	1.5154e-05	0.996356
ENSG00000116198.11	-0.00727064	0.683437
ENSG00000116205.9	-0.00274905	0.932966
ENSG00000116209.10	-0.00283005	0.150151
ENSG00000116212.13	-0.00525475	0.599062
ENSG00000116213.14	-0.0101175	0.553412
ENSG00000116218.11	-0.0521938	0.567114
ENSG00000116237.14	-0.00206984	0.632239
ENSG00000116273.5	0.00970567	0.456769
ENSG00000116285.11	-0.00151698	0.41535
ENSG00000116299.15	-0.0408055	0.27394
ENSG00000116455.12	-0.0076401	0.414651
ENSG00000116459.9	-0.0055521	0.241203
ENSG00000116539.9	0.0107994	0.0232075
ENSG00000116580.17	0.00759348	0.465303
ENSG00000116586.10	0.00184631	0.691238
ENSG00000116641.14	-0.00614022	0.617968
ENSG00000116667.11	0.00562837	0.188711
ENSG00000116668.11	0.064295	0.224613
ENSG00000116670.13	-0.00302703	0.729854
ENSG00000116679.14	0.0018373	0.248546
ENSG00000116698.19	0.0101798	0.091806
ENSG00000116747.11	0.0326445	5.46121e-06
ENSG00000116750.12	0.0154869	0.00821617
ENSG00000116754.12	-0.00410182	0.291635
ENSG00000116791.12	-0.00724654	0.302602
ENSG00000116830.10	-0.00626448	0.702654
ENSG00000116852.13	-0.00404795	0.829137
ENSG00000116871.14	0.0014282	0.572261
ENSG00000116874.10	-0.0182813	0.586271
ENSG00000116883.8	-0.011504	0.831744
ENSG00000116903.7	0.0665493	0.0357855
ENSG00000116906.10	0.00101496	0.939934
ENSG00000116918.12	-0.00468801	0.819622
ENSG00000116922.13	-0.0462288	0.191981
ENSG00000116954.7	0.00248047	0.71128
ENSG00000116983.11	-0.296471	0.364651
ENSG00000116985.9	-0.022188	0.263655
ENSG00000117054.12	-0.00153727	0.836668
ENSG00000117143.12	-0.00536157	0.288046
ENSG00000117262.17	-0.019194	0.803918
ENSG00000117385.14	-0.00102672	0.82271
ENSG00000117394.18	0.00016532	0.534365
ENSG00000117395.9	-0.00439356	0.326536
ENSG00000117399.12	0.00207422	0.439559
ENSG00000117408.9	0.00609873	0.479428
ENSG00000117475.12	0.0262633	0.0266683
ENSG00000117479.11	0.0142638	0.0394041
ENSG00000117500.11	0.00458108	0.2704
ENSG00000117505.11	-0.00217305	0.793321
ENSG00000117519.14	0.000783849	0.695833
ENSG00000117543.18	-0.0112603	0.722015
ENSG00000117593.9	0.0074067	0.419258
ENSG00000117598.10	0.0995756	0.0154483
ENSG00000117616.16	-0.00514085	0.338166
ENSG00000117620.11	0.00463376	0.666188
ENSG00000117650.11	-0.00837403	0.592292
ENSG00000117697.13	-0.00981217	0.754608
ENSG00000117862.10	-0.0120091	0.0635226
ENSG00000117877.9	-0.0405195	0.311526
ENSG00000117984.11	-0.000408151	0.192145
ENSG00000118007.11	0.0258281	0.0130031
ENSG00000118096.6	0.00680943	0.767226
ENSG00000118162.12	-0.0115791	0.654866
ENSG00000118181.9	-0.00148139	0.122164
ENSG00000118197.12	0.0438077	0.0333078
ENSG00000118217.5	0.00280109	0.460977
ENSG00000118246.12	-0.00694952	0.697239
ENSG00000118260.13	0.0238453	0.12119
ENSG00000118276.10	-0.00200978	0.799756
ENSG00000118298.9	0.390327	0.0653339
ENSG00000118307.17	0.308335	0.126782
ENSG00000118363.10	-0.0220523	0.125297
ENSG00000118369.11	0.0106444	0.203014
ENSG00000118454.11	0.0304275	0.349875
ENSG00000118492.15	5.36622	0.22463
ENSG00000118523.5	-0.00231979	0.146063
ENSG00000118564.13	-0.0104839	0.122293
ENSG00000118579.10	-0.00234175	0.828084
ENSG00000118640.9	-0.0028121	0.26355
ENSG00000118655.4	0.0157013	0.609915
ENSG00000118680.11	-0.00271827	0.00551622
ENSG00000118707.8	-0.00856958	0.40808
ENSG00000118849.8	-0.000262989	0.685233
ENSG00000118855.17	-0.0060704	0.281292
ENSG00000118894.13	0.0279901	0.659339
ENSG00000118900.13	0.0199427	0.0230194
ENSG00000118939.16	-0.00774917	0.732916
ENSG00000118965.13	-0.0247352	0.410492
ENSG00000118985.13	0.00490477	0.303398
ENSG00000119013.7	-0.0107768	0.413121
ENSG00000119048.6	-0.00597177	0.523469
ENSG00000119185.11	-0.00357972	0.668028
ENSG00000119203.12	-0.0078392	0.413482
ENSG00000119242.7	-0.0176247	0.145909
ENSG00000119321.7	0.00301398	0.728947
ENSG00000119328.10	0.00550887	0.765213
ENSG00000119383.18	-0.000793851	0.804007
ENSG00000119402.15	0.00941177	0.189628
ENSG00000119421.6	-0.00189857	0.820468
ENSG00000119446.12	0.0106008	0.467094
ENSG00000119509.11	0.0139208	0.68644
ENSG00000119523.9	0.0020129	0.873365
ENSG00000119537.14	0.000289859	0.964723
ENSG00000119616.10	-0.00916605	0.417421
ENSG00000119636.14	0.0677694	0.308247
ENSG00000119638.11	0.00648677	0.371427
ENSG00000119655.7	-0.000612233	0.666784
ENSG00000119669.4	0.00137985	0.789226
ENSG00000119682.15	-0.000541116	0.964735
ENSG00000119686.8	-0.00164	0.961671
ENSG00000119688.19	-0.0287209	0.0742922
ENSG00000119705.8	-0.0100089	0.254608
ENSG00000119707.12	-0.00445948	0.384306
ENSG00000119711.11	0.00398267	0.742623
ENSG00000119715.13	-0.135821	0.604989
ENSG00000119723.14	-0.044475	0.3701
ENSG00000119729.9	-0.00186903	0.764493
ENSG00000119760.14	-0.00355068	0.802998
ENSG00000119778.13	0.00492348	0.818368
ENSG00000119782.12	-0.0644958	0.101959
ENSG00000119844.13	0.00243858	0.786395
ENSG00000119862.11	0.0127736	0.0171334
ENSG00000119878.5	-0.0183623	0.358949
ENSG00000119888.9	-0.00138336	0.416956
ENSG00000119906.10	0.0271597	0.0896245
ENSG00000119965.11	0.00368395	0.950712
ENSG00000120008.14	0.0044161	0.672671
ENSG00000120051.13	0.498376	0.278116
ENSG00000120053.10	-0.00794135	0.434271
ENSG00000120253.12	0.0146143	0.307472
ENSG00000120256.8	0.00392596	0.076658
ENSG00000120265.15	0.00524931	0.455394
ENSG00000120334.14	0.0632432	0.120892
ENSG00000120370.11	0.0146897	0.571366
ENSG00000120438.10	0.00146805	0.434021
ENSG00000120458.8	0.0127176	0.652557
ENSG00000120509.9	-0.0111938	0.346592
ENSG00000120526.9	-0.0271199	0.111106
ENSG00000120533.11	-0.0233511	0.0235231
ENSG00000120539.13	0.00681173	0.67993
ENSG00000120647.8	-0.0232554	0.559151
ENSG00000120656.10	-0.00653211	0.740536
ENSG00000120658.11	-0.0232701	0.65868
ENSG00000120685.18	0.00881218	0.21597
ENSG00000120688.8	0.0303832	0.355402
ENSG00000120690.12	0.00694677	0.200051
ENSG00000120725.11	0.00189279	0.711561
ENSG00000120742.9	0.000762383	0.825236
ENSG00000120802.12	-0.0014782	0.604011
ENSG00000120820.11	0.00226786	0.893229
ENSG00000120868.12	0.0129084	0.471747
ENSG00000120889.11	-0.00655201	0.158672
ENSG00000120896.12	0.00141399	0.72656
ENSG00000120899.16	-0.00820162	0.196122
ENSG00000120925.12	0.0211756	0.0757874
ENSG00000121057.11	0.00350238	0.305831
ENSG00000121060.13	0.00890551	0.0291031
ENSG00000121068.12	-0.000713929	0.53586
ENSG00000121073.12	0.00352584	0.222495
ENSG00000121101.14	0.485222	0.131598
ENSG00000121104.6	0.0131154	0.1924
ENSG00000121289.16	0.00349002	0.604611
ENSG00000121297.6	0.00540742	0.449571
ENSG00000121310.15	-0.00299408	0.523733
ENSG00000121316.9	-0.00124383	0.580129
ENSG00000121440.13	-0.00645076	0.622177
ENSG00000121486.10	0.0141962	0.461592
ENSG00000121579.11	0.00142284	0.5935
ENSG00000121621.6	-0.00176939	0.937848
ENSG00000121766.13	-0.0203287	0.324153
ENSG00000121797.9	-0.024965	0.495246
ENSG00000121851.11	-0.0537447	0.0400864
ENSG00000121879.3	0.0320265	0.047333
ENSG00000121897.12	-0.11492	0.0806025
ENSG00000121931.14	-0.0484999	0.0800426
ENSG00000121988.16	0.0201159	0.829838
ENSG00000122008.14	0.0128196	0.738014
ENSG00000122026.9	-0.00209134	0.266924
ENSG00000122218.13	-0.000103111	0.904069
ENSG00000122299.10	-0.0103439	0.437632
ENSG00000122335.12	0.0274692	0.463767
ENSG00000122376.10	0.0317439	0.016803
ENSG00000122390.16	-0.0195935	0.229745
ENSG00000122432.15	0.244148	0.222456
ENSG00000122435.8	-0.00194421	0.959264
ENSG00000122481.15	-0.0208554	0.782451
ENSG00000122483.16	0.0097474	0.616501
ENSG00000122484.8	-0.00563164	0.832452
ENSG00000122507.19	0.0382271	0.297936
ENSG00000122512.13	0.0408955	0.220814
ENSG00000122545.16	-0.00192338	0.666005
ENSG00000122548.5	-11.7607	0.24558
ENSG00000122550.16	-0.000747565	0.969898
ENSG00000122557.8	-0.0216976	0.35986
ENSG00000122565.17	-0.00381887	0.179702
ENSG00000122566.19	-0.00164184	0.0426811
ENSG00000122592.7	0.107555	0.322427
ENSG00000122687.16	-0.00676032	0.618
ENSG00000122741.14	0.00280485	0.787765
ENSG00000122787.13	-1.27178	0.361278
ENSG00000122882.9	-0.0087606	0.586499
ENSG00000123064.11	-0.0152522	0.013763
ENSG00000123080.9	-0.00511837	0.604419
ENSG00000123094.14	0.0109319	0.465412
ENSG00000123119.10	-0.0413778	0.407206
ENSG00000123124.12	0.0038681	0.494791
ENSG00000123154.10	-0.0266241	0.529103
ENSG00000123191.12	0.0172152	0.00207687
ENSG00000123200.15	0.00196925	0.80139
ENSG00000123213.21	-0.00556162	0.649953
ENSG00000123219.11	-0.010363	0.712435
ENSG00000123240.15	-0.00179102	0.42091
ENSG00000123353.8	-0.00378787	0.738173
ENSG00000123364.4	0.0300417	0.0713573
ENSG00000123405.12	-0.0230861	0.716045
ENSG00000123472.11	-0.0103128	0.441326
ENSG00000123562.15	-0.00125386	0.625018
ENSG00000123600.17	0.00459824	0.810345
ENSG00000123684.11	0.00201491	0.731352
ENSG00000123700.4	0.0253051	0.320887
ENSG00000123908.10	0.0101995	0.021165
ENSG00000123977.8	0.452126	0.314758
ENSG00000123989.12	0.000701395	0.639284
ENSG00000124074.10	-0.00971581	0.473087
ENSG00000124104.17	-0.00724108	0.666331
ENSG00000124116.17	-0.204961	0.233964
ENSG00000124140.11	-0.0319003	0.851979
ENSG00000124201.13	0.00217681	0.469305
ENSG00000124207.15	-0.001623	0.605352
ENSG00000124209.3	0.010721	0.172821
ENSG00000124217.4	-0.0120875	0.709741
ENSG00000124224.15	0.0107142	0.821945
ENSG00000124249.6	0.0661987	0.15006
ENSG00000124260.10	0.00514597	0.443006
ENSG00000124275.13	0.0184819	0.150158
ENSG00000124357.11	-0.00518318	0.240267
ENSG00000124370.9	-0.0129062	0.754997
ENSG00000124383.7	-0.0140794	0.118956
ENSG00000124406.15	-0.0453488	0.0911603
ENSG00000124444.14	-0.0272695	0.387263
ENSG00000124571.16	0.000676633	0.876476
ENSG00000124635.8	0.00411849	0.809153
ENSG00000124641.13	-0.0262079	0.231715
ENSG00000124659.6	-0.0432148	0.0733333
ENSG00000124688.12	-0.0252815	0.175011
ENSG00000124702.16	-0.0034602	0.348837
ENSG00000124721.16	0.088687	0.0049096
ENSG00000124733.3	-0.00912393	0.121715
ENSG00000124784.7	-0.0189022	0.203131
ENSG00000124788.16	0.00162253	0.877487
ENSG00000124789.10	-0.00564724	0.343938
ENSG00000125122.13	-0.0649589	0.512708
ENSG00000125166.11	-0.000188841	0.939645
ENSG00000125285.5	-0.0415939	0.158215
ENSG00000125304.8	0.00269563	0.134245
ENSG00000125337.15	0.38355	0.335733
ENSG00000125352.5	-0.06492	0.0389486
ENSG00000125354.21	-0.00415907	0.523547
ENSG00000125356.6	-0.00591774	0.176177
ENSG00000125375.13	0.00976685	0.698904
ENSG00000125388.18	-0.0164068	0.860459
ENSG00000125445.9	0.00459294	0.477242
ENSG00000125447.15	0.00695527	0.161997
ENSG00000125457.12	0.00345848	0.821005
ENSG00000125458.5	-0.00339457	0.728199
ENSG00000125459.13	0.00232565	0.927158
ENSG00000125484.10	0.0164087	0.0730417
ENSG00000125485.16	0.00393032	0.887545
ENSG00000125505.15	-0.00163861	0.231497
ENSG00000125508.3	-0.0638068	0.163841
ENSG00000125510.14	0.00764645	0.899611
ENSG00000125531.6	-0.0263741	0.629769
ENSG00000125633.9	0.0136387	0.366698
ENSG00000125651.12	-0.00999277	0.157105
ENSG00000125656.7	-0.0207712	0.0392423
ENSG00000125733.16	-0.00659587	0.093505
ENSG00000125734.12	-0.0197904	0.0370805
ENSG00000125743.9	-0.00482183	0.0446413
ENSG00000125755.17	-0.00553338	0.301251
ENSG00000125779.20	0.0092907	0.599732
ENSG00000125817.7	0.00196119	0.585621
ENSG00000125827.7	-0.00608706	0.543576
ENSG00000125850.9	0.0124946	0.587468
ENSG00000125864.10	0.0150303	0.737994
ENSG00000125868.14	-0.000585985	0.538655
ENSG00000125869.8	-0.016642	0.52745
ENSG00000125870.9	-0.0131709	0.109897
ENSG00000125871.12	-0.000463721	0.972963
ENSG00000125885.12	0.0227182	0.128524
ENSG00000125895.5	-0.0162484	0.455988
ENSG00000125945.13	0.00548152	0.199554
ENSG00000125965.7	0.269258	0.628944
ENSG00000125967.15	0.000161261	0.986241
ENSG00000125970.10	0.000953094	0.533199
ENSG00000125995.14	-0.00128189	0.715648
ENSG00000125999.9	-0.000548856	0.861735
ENSG00000126001.14	0.00219025	0.147675
ENSG00000126003.6	0.00664754	0.0642717
ENSG00000126070.17	0.0276089	0.284787
ENSG00000126088.11	-0.0156678	0.112214
ENSG00000126106.12	-0.0509146	0.0856384
ENSG00000126107.13	-0.0141057	0.110421
ENSG00000126214.19	-0.0145514	0.269308
ENSG00000126215.12	0.00549526	0.722373
ENSG00000126226.20	-0.00477739	0.782172
ENSG00000126261.11	0.000507043	0.888918
ENSG00000126264.8	-0.0361329	0.292103
ENSG00000126432.12	-0.000998596	0.461747
ENSG00000126453.8	-0.0396249	0.00788108
ENSG00000126456.14	-0.0113163	0.0265213
ENSG00000126524.8	-0.00411109	0.543784
ENSG00000126749.13	-0.0262243	0.191017
ENSG00000126756.10	-0.0218852	0.0330547
ENSG00000126768.11	-0.00424247	0.582549
ENSG00000126773.11	0.00669503	0.692131
ENSG00000126790.10	0.0477447	0.200991
ENSG00000126803.9	-0.00364572	0.662021
ENSG00000126814.6	0.0150089	0.487375
ENSG00000126858.15	0.0138359	0.00429871
ENSG00000126890.13	-0.00327074	0.696326
ENSG00000126945.8	-0.00128285	0.846788
ENSG00000127054.17	-0.00804575	0.143937
ENSG00000127125.8	-0.015752	0.182722
ENSG00000127220.5	0.00423938	0.837837
ENSG00000127249.13	-0.0749099	0.586219
ENSG00000127328.20	0.000305011	0.908792
ENSG00000127415.11	0.000535341	0.957798
ENSG00000127419.15	-0.0012518	0.934415
ENSG00000127423.9	-0.066027	0.145837
ENSG00000127445.12	-0.0123672	0.314188
ENSG00000127452.7	-0.0484098	0.0743633
ENSG00000127463.12	0.00010736	0.984928
ENSG00000127481.13	0.00298969	0.387025
ENSG00000127526.12	0.00718887	0.464689
ENSG00000127528.5	-0.0287084	0.0830043
ENSG00000127554.12	-0.0592681	0.0540927
ENSG00000127561.13	-0.0135567	0.815862
ENSG00000127586.15	-0.0108191	0.301795
ENSG00000127720.6	0.00562719	0.955645
ENSG00000127774.6	-0.289159	0.0476527
ENSG00000127837.8	-0.00724335	0.0936939
ENSG00000127838.12	-0.00909303	0.0924207
ENSG00000127870.15	0.00643631	0.49128
ENSG00000127903.13	0.0167572	0.911461
ENSG00000127952.15	-0.00926857	0.384237
ENSG00000127980.14	0.0176601	0.31393
ENSG00000127990.14	0.0183225	0.124164
ENSG00000127993.13	0.0244215	0.239149
ENSG00000128050.7	-0.000555571	0.820877
ENSG00000128059.7	0.00593088	0.767358
ENSG00000128185.8	-0.014359	0.167343
ENSG00000128309.15	-0.00436055	0.280376
ENSG00000128311.12	-0.00195922	0.612083
ENSG00000128342.4	-0.000787245	0.889333
ENSG00000128408.8	-0.0134941	0.828217
ENSG00000128487.15	-0.0119898	0.193806
ENSG00000128512.18	0.0390331	0.0200432
ENSG00000128513.13	-0.00329732	0.868485
ENSG00000128524.4	-0.0070388	0.136249
ENSG00000128536.14	0.121793	0.499713
ENSG00000128585.16	0.0153262	0.000928219
ENSG00000128590.4	0.0116423	0.377421
ENSG00000128626.10	-0.00630286	0.376697
ENSG00000128641.16	0.00102193	0.449194
ENSG00000128645.12	-0.0952061	0.429274
ENSG00000128652.10	0.00124396	0.997267
ENSG00000128694.10	0.0191857	0.799104
ENSG00000128699.12	-0.0144952	0.373917
ENSG00000128789.19	-0.0225675	0.0109736
ENSG00000128791.10	-0.00375544	0.282781
ENSG00000128872.8	-0.00389819	0.878166
ENSG00000128886.10	-0.0731476	0.569524
ENSG00000128915.10	-0.0242239	0.222282
ENSG00000128923.9	0.00195319	0.7963
ENSG00000128951.12	-0.0245719	0.0148358
ENSG00000129003.14	0.00533992	0.245641
ENSG00000129055.11	0.0196162	0.0382922
ENSG00000129071.8	0.0096575	0.35972
ENSG00000129084.16	-0.0109397	0.152822
ENSG00000129128.11	0.00223423	0.590867
ENSG00000129197.13	-0.0385881	0.055987
ENSG00000129214.13	1.14797	0.127342
ENSG00000129219.12	-0.0130346	0.218347
ENSG00000129235.9	-0.00984141	0.0873398
ENSG00000129245.10	-0.0176779	0.198985
ENSG00000129250.10	-0.00145002	0.577211
ENSG00000129255.13	-0.0213586	0.00711298
ENSG00000129317.13	0.0128314	0.207414
ENSG00000129351.16	-0.00177615	0.343564
ENSG00000129422.12	0.00591936	0.1463
ENSG00000129472.11	-0.00597837	0.845068
ENSG00000129473.8	0.0100837	0.169754
ENSG00000129474.14	-0.000253238	0.961182
ENSG00000129484.12	0.00729881	0.716163
ENSG00000129493.13	0.0110174	0.580148
ENSG00000129514.5	-0.00246171	0.319756
ENSG00000129535.11	-0.440174	0.100203
ENSG00000129559.11	-0.0130669	0.0741374
ENSG00000129595.11	0.020924	0.451894
ENSG00000129654.7	-0.000208518	0.969726
ENSG00000129673.8	0.232278	0.64128
ENSG00000129933.19	0.00273509	0.718117
ENSG00000130023.14	0.0138744	0.355286
ENSG00000130024.13	-0.00142019	0.871183
ENSG00000130035.5	-0.0357095	0.788729
ENSG00000130066.15	-0.000297235	0.710947
ENSG00000130150.10	0.000620947	0.967467
ENSG00000130165.9	-0.022208	0.0356311
ENSG00000130175.8	-0.00334555	0.0543527
ENSG00000130193.7	-0.00063356	0.758553
ENSG00000130204.11	-0.00611141	0.135664
ENSG00000130234.9	0.00855878	0.0844966
ENSG00000130299.15	-0.00461788	0.823157
ENSG00000130303.11	-0.00204633	0.0410756
ENSG00000130311.9	-0.0204101	0.0747085
ENSG00000130313.5	-0.00153336	0.749135
ENSG00000130332.13	-0.0121494	0.0853182
ENSG00000130347.11	-0.0253598	0.568318
ENSG00000130348.10	-0.0159056	0.451746
ENSG00000130396.19	0.00841151	0.00702683
ENSG00000130522.5	-0.0043508	0.0500417
ENSG00000130559.17	0.0163206	0.0180778
ENSG00000130653.14	-0.0413789	0.38056
ENSG00000130675.13	0.0452562	0.584718
ENSG00000130701.3	0.00214397	0.856555
ENSG00000130725.6	-0.00965407	0.118599
ENSG00000130726.10	-0.00133731	0.335771
ENSG00000130731.14	-0.00940772	0.124174
ENSG00000130733.9	-0.00259115	0.744843
ENSG00000130749.8	0.00450836	0.727152
ENSG00000130755.11	-0.0157681	0.131113
ENSG00000130818.9	0.023899	0.302042
ENSG00000130821.14	-1.13024e-05	0.991309
ENSG00000130822.14	-0.00489644	0.306998
ENSG00000130856.14	0.0699743	0.00489806
ENSG00000131023.11	0.0279855	0.0867969
ENSG00000131037.13	-0.000610036	0.80876
ENSG00000131042.12	-0.0474321	0.0708373
ENSG00000131044.15	-0.151242	0.759955
ENSG00000131061.12	-0.0384822	0.229971
ENSG00000131067.15	0.00605191	0.273616
ENSG00000131069.18	0.00457237	0.335912
ENSG00000131096.9	0.390296	0.259231
ENSG00000131100.11	-0.00653306	0.172025
ENSG00000131143.7	-0.00107212	0.287043
ENSG00000131148.7	-0.0125637	0.443964
ENSG00000131165.13	-0.000490884	0.878794
ENSG00000131171.11	0.00181771	0.562519
ENSG00000131351.13	-0.0389475	0.267414
ENSG00000131355.13	-0.0323471	0.960222
ENSG00000131373.13	-0.0327697	0.191935
ENSG00000131374.13	0.00224217	0.788298
ENSG00000131375.8	-0.00805332	0.626732
ENSG00000131462.6	0.00372042	0.564191
ENSG00000131467.9	0.00308236	0.449078
ENSG00000131473.15	0.00452562	0.0831154
ENSG00000131495.7	-0.00812735	0.286454
ENSG00000131503.19	0.0550221	0.472744
ENSG00000131504.14	0.00199644	0.335308
ENSG00000131652.12	-0.0166611	0.157961
ENSG00000131653.11	-0.000646309	0.916626
ENSG00000131668.12	0.00239847	0.798944
ENSG00000131732.10	-0.00821709	0.786184
ENSG00000131773.12	-0.0070023	0.5788
ENSG00000131778.16	-0.00838619	0.406714
ENSG00000131779.9	-0.0169308	0.27013
ENSG00000131781.11	0.0124659	0.330576
ENSG00000131791.7	0.00833636	0.624163
ENSG00000131797.11	-0.000537558	0.981262
ENSG00000131845.13	0.0587416	0.0584528
ENSG00000131848.8	-0.0758828	0.35129
ENSG00000131849.10	0.107627	0.0468067
ENSG00000131876.15	-0.0173243	0.144638
ENSG00000131944.8	0.0485622	0.222805
ENSG00000131951.9	0.29729	0.00724123
ENSG00000132000.10	-0.00217249	0.890865
ENSG00000132016.10	0.00722286	0.815352
ENSG00000132017.9	-0.025554	0.0711228
ENSG00000132024.16	-0.00579204	0.377358
ENSG00000132128.15	-0.00818435	0.140933
ENSG00000132141.12	0.161859	0.146131
ENSG00000132207.16	2.64668	0.11099
ENSG00000132254.11	-0.00059602	0.950815
ENSG00000132256.17	-0.011208	0.445271
ENSG00000132259.11	-0.819781	0.467547
ENSG00000132275.9	-0.0285689	0.403287
ENSG00000132286.10	-0.0285445	0.310406
ENSG00000132300.17	-0.00423326	0.633729
ENSG00000132305.19	-0.00580943	0.391345
ENSG00000132361.15	-0.00328109	0.284441
ENSG00000132376.18	-0.0161766	0.17909
ENSG00000132383.10	-0.00206593	0.679959
ENSG00000132394.9	0.010433	0.474993
ENSG00000132424.13	-0.000111751	0.980001
ENSG00000132432.12	0.000292217	0.853219
ENSG00000132466.16	0.000682215	0.882807
ENSG00000132478.8	0.0115426	0.306005
ENSG00000132485.11	-0.00201312	0.816459
ENSG00000132541.9	0.00276319	0.770023
ENSG00000132549.17	0.0136903	0.010365
ENSG00000132581.8	0.00510636	0.568709
ENSG00000132589.14	-0.000621699	0.675048
ENSG00000132591.10	0.00117327	0.851407
ENSG00000132600.15	0.00538346	0.117842
ENSG00000132603.12	0.00379147	0.637787
ENSG00000132635.15	-0.00876667	0.315981
ENSG00000132646.9	-0.00186525	0.372881
ENSG00000132661.3	-0.017425	0.241186
ENSG00000132664.10	-0.0535075	0.208484
ENSG00000132692.17	0.207143	0.145087
ENSG00000132716.17	-0.00301163	0.565823
ENSG00000132718.8	-0.00279709	0.825912
ENSG00000132740.7	0.00337413	0.347119
ENSG00000132763.13	-0.0268537	0.504764
ENSG00000132773.10	-0.0883098	0.0454813
ENSG00000132781.16	-0.0201231	0.349924
ENSG00000132801.6	0.0210437	0.800654
ENSG00000132823.9	-0.0131823	0.286027
ENSG00000132837.13	0.104342	0.793549
ENSG00000132846.5	0.0224313	0.315611
ENSG00000132849.17	0.00667616	0.0566913
ENSG00000132906.16	-0.0188296	0.344627
ENSG00000132950.17	-0.00568514	0.882259
ENSG00000132952.10	-0.0340371	0.260165
ENSG00000133027.16	-0.0176902	0.326337
ENSG00000133028.9	0.0103175	0.0197341
ENSG00000133112.15	-0.00027289	0.114163
ENSG00000133114.16	0.0178753	0.326614
ENSG00000133124.11	0.0106293	0.144156
ENSG00000133247.12	-0.0424234	0.119105
ENSG00000133302.11	-0.0153749	0.731371
ENSG00000133460.18	-0.00871004	0.798203
ENSG00000133597.8	-0.000465015	0.957746
ENSG00000133639.4	-0.00171383	0.460753
ENSG00000133640.17	-0.0504266	0.741645
ENSG00000133641.16	-0.0212788	0.426376
ENSG00000133678.12	0.0163101	0.00363907
ENSG00000133740.9	-0.0321771	0.252611
ENSG00000133773.10	-0.0525578	0.0375111
ENSG00000133872.12	-0.00291549	0.27181
ENSG00000133943.19	-0.0058898	0.408036
ENSG00000133958.12	-0.0968459	0.689998
ENSG00000133980.4	-0.223177	0.49759
ENSG00000133985.2	0.00461265	0.638211
ENSG00000134001.11	0.00041964	0.932651
ENSG00000134077.14	-0.00815771	0.557924
ENSG00000134107.4	-0.000670027	0.420581
ENSG00000134109.9	-0.00150398	0.732162
ENSG00000134121.8	-0.00094425	0.930352
ENSG00000134146.10	0.00570241	0.904088
ENSG00000134153.8	-0.0144679	0.211651
ENSG00000134215.14	0.00415039	0.286915
ENSG00000134247.9	0.00192366	0.0536873
ENSG00000134255.12	0.000146387	0.99465
ENSG00000134262.11	-0.00896014	0.806115
ENSG00000134278.13	0.00674651	0.707464
ENSG00000134283.16	-0.00151893	0.820528
ENSG00000134291.10	-1.52404e-05	0.995947
ENSG00000134297.6	0.0516919	0.295254
ENSG00000134321.10	0.00166582	0.437495
ENSG00000134324.10	-0.025046	0.157426
ENSG00000134326.10	0.00380929	0.428018
ENSG00000134352.18	1.36459e-05	0.996199
ENSG00000134444.12	-0.000382211	0.965574
ENSG00000134452.18	-0.00714253	0.391314
ENSG00000134461.14	-0.0208027	0.56786
ENSG00000134575.8	-0.010368	0.176502
ENSG00000134690.9	-0.0104595	0.294047
ENSG00000134717.16	-0.0186947	0.123119
ENSG00000134748.12	-0.0122704	0.346639
ENSG00000134755.13	0.000291971	0.433368
ENSG00000134758.12	-0.00892434	0.616604
ENSG00000134759.12	-0.00109634	0.89525
ENSG00000134779.13	-0.000603804	0.914285
ENSG00000134824.12	-0.000775236	0.679996
ENSG00000134825.12	-0.0109129	0.0993585
ENSG00000134851.11	-0.00436359	0.239381
ENSG00000134852.13	0.0218089	0.0495
ENSG00000134882.14	0.0021903	0.716985
ENSG00000134897.12	0.0267263	0.161532
ENSG00000134901.11	0.0661926	0.0142541
ENSG00000134905.15	-0.0186197	0.100069
ENSG00000134910.11	0.000300951	0.920913
ENSG00000134987.10	0.00882781	0.469712
ENSG00000134996.11	0.00359556	0.62218
ENSG00000135018.12	0.00257212	0.419518
ENSG00000135045.6	0.0162022	0.529421
ENSG00000135077.7	-0.0275024	0.0845181
ENSG00000135097.5	-0.0103885	0.66006
ENSG00000135119.13	0.0127498	0.702691
ENSG00000135164.17	0.0141853	0.103687
ENSG00000135205.13	-0.00523039	0.88507
ENSG00000135211.5	0.0113366	0.698091
ENSG00000135241.15	0.0055245	0.363046
ENSG00000135298.12	-0.253661	0.327867
ENSG00000135336.13	0.0220108	0.311695
ENSG00000135404.10	-0.00115594	0.0894457
ENSG00000135424.14	0.000204771	0.963409
ENSG00000135441.6	-0.0177331	0.125781
ENSG00000135446.15	0.000965615	0.84098
ENSG00000135473.13	0.00187366	0.158991
ENSG00000135486.16	-0.00223288	0.0265337
ENSG00000135502.15	0.268417	0.38309
ENSG00000135517.6	0.320735	0.807299
ENSG00000135525.17	-0.00310814	0.63483
ENSG00000135535.13	0.00142343	0.30976
ENSG00000135540.10	0.0181642	0.0178188
ENSG00000135541.19	0.0083806	0.750908
ENSG00000135549.13	-0.00257419	0.631299
ENSG00000135587.7	0.000209212	0.991764
ENSG00000135617.3	0.0126056	0.319735
ENSG00000135624.14	-0.00189223	0.32942
ENSG00000135637.12	0.051093	0.250362
ENSG00000135677.9	-0.000675739	0.708774
ENSG00000135698.8	-0.0079469	0.57308
ENSG00000135720.11	0.0111057	0.0182981
ENSG00000135722.7	0.0152917	0.653728
ENSG00000135763.8	0.0078661	0.760891
ENSG00000135801.8	-0.000151431	0.994117
ENSG00000135837.14	0.0143254	0.0303194
ENSG00000135870.10	0.0259675	0.0101711
ENSG00000135903.17	0.0795421	0.419098
ENSG00000135913.9	0.0587979	0.0740689
ENSG00000135930.12	-0.00774418	0.377777
ENSG00000135951.13	0.0776292	0.192272
ENSG00000135953.9	0.0226395	0.0364225
ENSG00000135956.7	0.00245919	0.644722
ENSG00000135972.7	-0.0139401	0.44965
ENSG00000135974.8	-0.0145269	0.675854
ENSG00000136002.15	0.00594106	0.232846
ENSG00000136014.10	-0.0290077	0.736627
ENSG00000136021.16	-0.000547554	0.946673
ENSG00000136044.10	0.00570744	0.495691
ENSG00000136051.12	0.00660511	0.562376
ENSG00000136108.13	0.00800372	0.0724306
ENSG00000136122.14	0.00964551	0.787629
ENSG00000136143.12	0.00524653	0.536223
ENSG00000136160.13	0.00998095	0.0100877
ENSG00000136167.12	-0.00129329	0.264852
ENSG00000136169.15	0.00779015	0.833068
ENSG00000136261.13	-0.00677134	0.10971
ENSG00000136305.10	-0.600934	0.355003
ENSG00000136319.10	0.019446	0.64316
ENSG00000136367.13	-0.0115113	0.798773
ENSG00000136378.13	-0.00756014	0.415358
ENSG00000136425.11	0.0191196	0.175982
ENSG00000136449.12	0.53982	0.000185254
ENSG00000136450.11	-0.00287123	0.461122
ENSG00000136451.7	0.0111141	0.184261
ENSG00000136490.7	-0.00515432	0.297108
ENSG00000136504.10	0.0064831	0.0274636
ENSG00000136521.11	0.00295761	0.636816
ENSG00000136522.12	-0.0033286	0.758884
ENSG00000136536.13	0.0124693	0.0475511
ENSG00000136630.12	-0.0405539	0.311942
ENSG00000136699.18	0.000840832	0.922812
ENSG00000136710.8	-0.00714288	0.50471
ENSG00000136718.8	-0.00544049	0.554862
ENSG00000136738.13	-0.0227262	0.226245
ENSG00000136758.17	0.00184473	0.633015
ENSG00000136802.10	0.00263304	0.0861949
ENSG00000136868.10	0.0093678	0.257128
ENSG00000136870.9	0.0240632	0.414361
ENSG00000136874.9	0.0557835	0.0345856
ENSG00000136875.11	0.00384684	0.675105
ENSG00000136897.7	0.000307269	0.985112
ENSG00000136925.13	0.042948	0.298464
ENSG00000136937.11	0.00767417	0.401908
ENSG00000136942.13	-0.00021249	0.656647
ENSG00000136944.16	0.0937617	0.0846566
ENSG00000136950.12	-0.00152855	0.726595
ENSG00000136986.8	-0.00202936	0.754564
ENSG00000137055.13	-0.00818023	0.428463
ENSG00000137074.17	-0.0119116	0.339626
ENSG00000137076.17	-0.000233178	0.834467
ENSG00000137094.13	-0.00740618	0.624266
ENSG00000137101.11	-0.0521687	0.186962
ENSG00000137103.15	-0.0104875	0.600189
ENSG00000137133.9	-0.0203088	0.164641
ENSG00000137210.12	-0.011683	0.206807
ENSG00000137216.17	0.000278181	0.946199
ENSG00000137269.13	-0.00251746	0.744053
ENSG00000137285.9	-0.097075	0.223057
ENSG00000137310.10	0.0016497	0.595086
ENSG00000137312.13	-0.00635993	0.0212363
ENSG00000137364.4	0.00365416	0.760589
ENSG00000137413.14	-0.0232782	0.209421
ENSG00000137434.10	0.127426	0.191804
ENSG00000137449.14	0.0175767	0.0703682
ENSG00000137492.6	0.00917712	0.402661
ENSG00000137494.12	-0.1479	0.00968263
ENSG00000137497.16	-0.000713586	0.722547
ENSG00000137500.8	-0.0170642	0.233072
ENSG00000137502.8	-0.0108808	0.629724
ENSG00000137522.16	-0.00257462	0.891857
ENSG00000137571.9	-0.110152	0.301717
ENSG00000137574.9	-0.020208	0.2165
ENSG00000137601.14	0.0550511	0.0900786
ENSG00000137642.11	9.10098e-05	0.937906
ENSG00000137656.10	-0.0107817	0.659001
ENSG00000137693.12	-0.000311079	0.832316
ENSG00000137707.12	1.92606	0.302039
ENSG00000137720.6	-0.0115507	0.6046
ENSG00000137764.18	-0.0411488	0.301627
ENSG00000137770.12	0.00801542	0.634717
ENSG00000137804.11	-0.00154286	0.793172
ENSG00000137807.12	-0.00267268	0.788145
ENSG00000137814.8	0.00347602	0.861172
ENSG00000137819.12	-0.00361575	0.774733
ENSG00000137821.10	-0.0131543	0.744139
ENSG00000137857.16	-0.000615911	0.873234
ENSG00000137871.18	-0.0116355	0.609551
ENSG00000137936.15	-0.0122061	0.11284
ENSG00000137960.5	0.000486246	0.984156
ENSG00000137976.7	-0.694995	0.473098
ENSG00000137996.11	-0.0143566	0.437204
ENSG00000138032.19	-0.0142981	0.297337
ENSG00000138074.13	-0.00386816	0.375967
ENSG00000138075.10	0.510426	0.00827551
ENSG00000138078.14	0.00161096	0.892633
ENSG00000138081.18	0.0187804	0.274675
ENSG00000138083.4	-0.0341889	0.377129
ENSG00000138085.15	-0.00651846	0.246827
ENSG00000138092.9	-0.00658138	0.779805
ENSG00000138136.6	-0.0248501	0.797316
ENSG00000138172.9	-0.0249796	0.119522
ENSG00000138175.8	-0.0153821	0.413246
ENSG00000138286.13	0.000172658	0.991948
ENSG00000138375.11	-0.0131548	0.562598
ENSG00000138376.9	0.00949075	0.721369
ENSG00000138400.11	-0.0397321	0.876668
ENSG00000138413.12	0.000648076	0.309965
ENSG00000138433.14	-0.0195125	0.17502
ENSG00000138434.15	0.00127029	0.535738
ENSG00000138442.8	-0.0153274	0.375496
ENSG00000138459.7	0.0222329	0.28479
ENSG00000138463.8	0.0303122	0.0231195
ENSG00000138496.15	8.2084e-05	0.969929
ENSG00000138614.13	-0.0221544	0.151484
ENSG00000138629.14	-0.0264617	0.064
ENSG00000138640.13	-0.00485579	0.391396
ENSG00000138650.8	0.0263512	0.178253
ENSG00000138658.14	0.0286259	0.32766
ENSG00000138660.10	0.00376227	0.825002
ENSG00000138668.17	-0.00402982	0.102725
ENSG00000138674.15	0.00216178	0.529916
ENSG00000138686.8	0.0358033	0.201302
ENSG00000138696.9	-0.00756607	0.81802
ENSG00000138698.13	0.00126349	0.902698
ENSG00000138756.16	0.0276379	0.341999
ENSG00000138757.13	0.00441267	0.297606
ENSG00000138760.7	-0.000316329	0.831084
ENSG00000138768.13	-0.00113916	0.857166
ENSG00000138802.10	0.0141902	0.169276
ENSG00000138814.15	0.00840638	0.070596
ENSG00000138823.11	0.0854359	0.741451
ENSG00000138867.15	-0.00431949	0.482971
ENSG00000138942.14	0.00678695	0.691239
ENSG00000139117.12	0.00733275	0.553239
ENSG00000139151.13	0.633259	0.0300561
ENSG00000139163.14	0.00318702	0.637742
ENSG00000139180.9	-0.0263008	0.0263955
ENSG00000139182.12	0.0037468	0.212991
ENSG00000139187.8	-0.462896	0.118967
ENSG00000139192.10	-0.0118602	0.148032
ENSG00000139194.6	-0.180414	0.19816
ENSG00000139197.9	-0.00980335	0.480154
ENSG00000139211.6	-0.00396613	0.0502999
ENSG00000139233.5	-0.0179818	0.344678
ENSG00000139263.10	0.00588828	0.565929
ENSG00000139266.5	-0.0122217	0.460507
ENSG00000139323.12	-0.00994919	0.651661
ENSG00000139324.10	0.00794818	0.263319
ENSG00000139343.9	-0.0122922	0.0342493
ENSG00000139344.6	0.0240457	0.886841
ENSG00000139352.3	-0.321979	0.577576
ENSG00000139372.13	-0.00316371	0.826686
ENSG00000139405.14	-0.0338844	0.13889
ENSG00000139428.10	-0.015876	0.272958
ENSG00000139433.8	0.000314952	0.840923
ENSG00000139496.14	0.00241422	0.786606
ENSG00000139517.7	0.0224931	0.10362
ENSG00000139537.9	0.230431	0.0240185
ENSG00000139546.9	-0.0225227	0.138659
ENSG00000139579.11	-0.0113027	0.399773
ENSG00000139618.13	0.0202054	0.0365948
ENSG00000139625.11	0.0180011	0.410476
ENSG00000139631.17	0.00187064	0.831722
ENSG00000139637.12	-0.017663	0.150443
ENSG00000139644.11	2.84096e-05	0.956104
ENSG00000139651.10	0.0168836	0.226273
ENSG00000139687.12	0.00432048	0.500791
ENSG00000139697.10	0.0123837	0.112623
ENSG00000139718.9	0.0104907	0.323768
ENSG00000139725.6	-0.0909646	0.161312
ENSG00000139746.14	0.0140573	0.143275
ENSG00000139826.5	0.0298778	0.298601
ENSG00000139842.13	0.0043472	0.382902
ENSG00000139865.15	0.050057	0.0738528
ENSG00000139910.18	0.00642662	0.890844
ENSG00000139946.8	-0.0154158	0.58448
ENSG00000139971.14	0.112927	0.0194728
ENSG00000139974.14	0.0229914	0.684383
ENSG00000140006.10	0.0545011	0.119728
ENSG00000140025.14	0.000865849	0.982349
ENSG00000140044.11	-0.0063343	0.559152
ENSG00000140105.16	-0.000404949	0.262274
ENSG00000140107.10	-1.42529	0.500772
ENSG00000140153.16	0.0254055	0.37502
ENSG00000140254.11	0.00489846	0.519059
ENSG00000140262.16	-0.00587337	0.539361
ENSG00000140264.18	-0.00163251	0.0575301
ENSG00000140274.12	-1.75721e-05	0.995714
ENSG00000140279.11	-0.000327307	0.762271
ENSG00000140280.12	-0.138841	0.00391827
ENSG00000140284.9	0.00289586	0.761491
ENSG00000140319.9	-0.00728829	0.010263
ENSG00000140382.13	0.00991069	0.698046
ENSG00000140395.7	-0.00960852	0.490953
ENSG00000140398.12	-0.0032724	0.737653
ENSG00000140400.13	-0.0146591	0.14591
ENSG00000140403.11	-0.00102042	0.788882
ENSG00000140406.3	-0.0138173	0.228564
ENSG00000140463.12	-0.0200898	0.594838
ENSG00000140464.18	-0.00238194	0.336202
ENSG00000140471.15	-0.0260718	0.48953
ENSG00000140521.10	-0.0089604	0.41941
ENSG00000140526.15	0.00242839	0.0346718
ENSG00000140527.13	-0.0167868	0.933166
ENSG00000140598.12	0.0136541	0.425231
ENSG00000140623.12	0.389331	0.679595
ENSG00000140632.15	-0.00289823	0.68585
ENSG00000140682.17	-0.00240445	0.688679
ENSG00000140694.15	-0.00777074	0.497464
ENSG00000140718.17	0.00714101	0.522342
ENSG00000140740.9	-0.00208106	0.513019
ENSG00000140743.6	-0.00542245	0.569219
ENSG00000140750.15	-0.000733968	0.910086
ENSG00000140795.11	0.807298	0.0169021
ENSG00000140829.10	0.0124303	0.0298424
ENSG00000140830.7	0.0264238	0.181569
ENSG00000140832.8	0.00597347	0.347163
ENSG00000140836.13	0.00692586	0.0723089
ENSG00000140839.10	0.206993	0.55431
ENSG00000140848.15	-0.000352049	0.974588
ENSG00000140943.15	0.00104419	0.794398
ENSG00000140948.10	0.0183632	0.0538836
ENSG00000140987.18	0.334356	0.295417
ENSG00000140988.14	-0.000782373	0.0477688
ENSG00000140993.9	0.274609	0.0323192
ENSG00000141012.11	-0.00244052	0.833797
ENSG00000141013.13	0.00673555	0.754082
[truncated: 4,438 more rows]

## Sheet: BG.DFI.BRCA
Gene	Coefficient	Logrank p-value
ENSG00000000419.11	-0.00367699	0.498553
ENSG00000001561.6	-0.00127146	0.734007
ENSG00000001629.8	0.00150472	0.631547
ENSG00000001631.13	-0.00597855	0.515654
ENSG00000002016.15	-0.023163	0.461828
ENSG00000002933.6	-0.00082043	0.68567
ENSG00000003056.6	-0.00395209	0.251853
ENSG00000003147.16	0.000364052	0.916225
ENSG00000003249.12	0.00353653	0.0995884
ENSG00000003509.14	0.0444579	0.0691981
ENSG00000004139.12	-0.0155973	0.438459
ENSG00000004142.10	0.000735453	0.621761
ENSG00000004455.15	0.0023719	0.130809
ENSG00000004478.7	6.62532e-05	0.876598
ENSG00000004700.14	-0.00036551	0.947129
ENSG00000004776.10	0.00738523	0.113227
ENSG00000004799.7	-0.000574614	0.686196
ENSG00000004961.13	0.0288587	0.0011357
ENSG00000005001.8	-0.0121859	0.277547
ENSG00000005022.5	0.000289672	0.70942
ENSG00000005073.5	-0.0171481	0.655093
ENSG00000005100.11	0.00653327	0.454308
ENSG00000005156.10	-0.00158998	0.682286
ENSG00000005175.8	-0.00819605	0.383713
ENSG00000005194.13	0.00578886	0.204722
ENSG00000005206.15	0.00471579	0.297445
ENSG00000005448.15	-0.00147943	0.897231
ENSG00000005469.10	-0.00547429	0.216008
ENSG00000005483.18	-0.00333061	0.274371
ENSG00000005513.9	0.00313008	0.221662
ENSG00000005812.9	-0.00920071	0.0217969
ENSG00000005884.16	0.000496259	0.576497
ENSG00000005889.14	-0.00176549	0.541556
ENSG00000006016.9	0.00169116	0.425479
ENSG00000006118.13	0.00100063	0.301136
ENSG00000006125.15	-0.000549394	0.252498
ENSG00000006432.14	0.0137995	0.123672
ENSG00000006459.9	0.00102153	0.817048
ENSG00000006530.14	0.00783691	0.363065
ENSG00000006576.15	0.00206353	0.690431
ENSG00000006634.6	0.0113251	0.21383
ENSG00000006638.10	0.119443	7.07295e-09
ENSG00000006695.9	0.0339418	0.030398
ENSG00000006712.13	0.00253196	0.204795
ENSG00000006740.15	-0.0164547	0.265913
ENSG00000006747.13	4.96088e-05	0.981859
ENSG00000006837.10	-0.095762	0.576011
ENSG00000007001.11	0.344952	0.180173
ENSG00000007255.9	0.00249237	0.552684
ENSG00000007350.15	0.117318	0.00899023
ENSG00000007376.6	0.00674485	0.185519
ENSG00000007384.14	-0.00461413	0.294177
ENSG00000007520.3	0.00373511	0.291041
ENSG00000007545.14	-0.00484502	0.601248
ENSG00000008018.8	0.00228419	0.128984
ENSG00000008128.21	-0.089807	0.0765909
ENSG00000008300.13	0.000802608	0.880066
ENSG00000008382.14	0.00370385	0.691104
ENSG00000008405.10	0.00367362	0.699801
ENSG00000008735.13	0.00301362	0.0444641
ENSG00000008869.10	-0.000187388	0.972137
ENSG00000008952.15	-0.00127297	0.406697
ENSG00000008988.8	0.000175656	0.216661
ENSG00000009413.14	0.00132334	0.755892
ENSG00000009830.10	-0.00022761	0.982204
ENSG00000010030.12	-0.0208316	0.19468
ENSG00000010072.14	0.0189088	0.147895
ENSG00000010244.15	0.00187851	0.369955
ENSG00000010282.13	-0.541467	0.375074
ENSG00000010292.11	0.000447642	0.694309
ENSG00000010318.18	-0.0856652	0.0459065
ENSG00000010361.12	-0.0162887	0.126412
ENSG00000010671.14	-0.0213027	0.209964
ENSG00000010803.15	-0.000714151	0.86989
ENSG00000011021.20	-0.0510173	0.018007
ENSG00000011028.12	0.000475387	0.0431661
ENSG00000011114.13	0.00805783	0.164963
ENSG00000011132.10	0.0159537	0.323077
ENSG00000011258.14	-0.001457	0.752535
ENSG00000011260.12	-0.000847432	0.793255
ENSG00000011295.14	-0.00269979	0.545387
ENSG00000011405.12	-0.00227014	0.447536
ENSG00000011426.9	0.00419129	0.00217366
ENSG00000011478.10	-0.00212229	0.873161
ENSG00000011566.13	0.00519286	0.327015
ENSG00000012048.18	0.00521159	0.42912
ENSG00000012171.16	-0.00670224	0.0365562
ENSG00000012660.12	-0.00167137	0.00117081
ENSG00000012963.12	-0.000954956	0.803661
ENSG00000013016.13	0.00792178	0.424952
ENSG00000013364.17	-0.00162826	0.179849
ENSG00000013375.14	0.00439756	0.162868
ENSG00000013392.7	0.00155384	0.94619
ENSG00000013523.8	-0.00262224	0.765047
ENSG00000013563.12	0.0122915	0.274172
ENSG00000013573.15	-0.00227979	0.73537
ENSG00000013583.7	-0.000554909	0.533489
ENSG00000013810.17	0.00340375	0.127432
ENSG00000014123.9	0.00580792	0.0988414
ENSG00000014164.6	0.00788421	0.0873296
ENSG00000015133.17	-0.000834251	0.770453
ENSG00000015153.13	0.00413553	0.798103
ENSG00000015479.16	-0.00765301	0.710833
ENSG00000016082.13	-0.0131502	0.881209
ENSG00000016391.9	-0.000603555	0.877158
ENSG00000018189.11	0.0097091	0.112434
ENSG00000018510.11	-0.00347362	0.221597
ENSG00000018869.15	-0.0907295	0.104143
ENSG00000020129.14	0.00768668	0.000164574
ENSG00000020922.11	-0.000298832	0.9683
ENSG00000021826.13	-0.00399673	0.592773
ENSG00000021852.11	0.0400328	0.0413342
ENSG00000022840.14	0.000347736	0.860169
ENSG00000023041.10	-0.0187624	0.0527164
ENSG00000023228.12	0.00286789	0.259424
ENSG00000023318.7	0.00585907	0.0727609
ENSG00000023734.9	0.000596268	0.663256
ENSG00000024526.15	0.0070182	0.064576
ENSG00000024862.15	-0.0145498	0.248594
ENSG00000025423.10	0.0143089	0.561383
ENSG00000025434.17	-0.0178263	0.0472973
ENSG00000025770.17	0.00613315	0.0695091
ENSG00000025796.12	0.000536502	0.568107
ENSG00000026103.18	-0.000316011	0.973133
ENSG00000026508.15	-6.76873e-05	0.798999
ENSG00000027001.8	-0.00449385	0.472958
ENSG00000028203.16	0.00095219	0.749363
ENSG00000028310.16	0.00240221	0.738865
ENSG00000028528.13	-0.00302087	0.168216
ENSG00000029364.10	3.12177e-05	0.98465
ENSG00000030419.15	0.00382215	0.371832
ENSG00000031691.6	-0.0057474	0.829248
ENSG00000031823.13	0.00395987	0.487973
ENSG00000032219.17	-0.0086843	0.415618
ENSG00000032742.16	-0.0366152	0.00965794
ENSG00000033011.10	0.0037215	0.683755
ENSG00000033030.12	-0.00564638	0.642138
ENSG00000033178.11	0.00423674	0.156793
ENSG00000034533.10	-0.0765583	0.0474876
ENSG00000034693.13	-0.0145183	0.370487
ENSG00000036672.14	-0.0101662	0.736574
ENSG00000037241.6	0.00755887	0.509145
ENSG00000037474.13	0.00105479	0.632981
ENSG00000037637.9	-0.0235208	0.142577
ENSG00000037749.10	-0.00895378	0.270416
ENSG00000037897.15	0.000636077	0.90384
ENSG00000038219.11	-0.00174505	0.652204
ENSG00000039123.14	-0.00777759	0.0935307
ENSG00000039600.9	-0.122487	0.529325
ENSG00000039650.8	0.00462002	0.510334
ENSG00000040487.11	-0.000744408	0.958388
ENSG00000040531.13	0.00421894	0.82214
ENSG00000041880.13	-0.0293601	0.0052699
ENSG00000042088.12	0.0173127	0.127621
ENSG00000042429.9	0.0120163	0.0131827
ENSG00000042445.12	-0.00253571	0.252766
ENSG00000042493.14	-0.000181001	0.841485
ENSG00000044574.7	-2.51722e-05	0.916807
ENSG00000046604.11	3.04339e-07	0.999688
ENSG00000046651.13	-0.0066672	0.280737
ENSG00000047056.13	-0.00122557	0.90917
ENSG00000047365.10	-0.00329681	0.703482
ENSG00000047410.12	-0.000309011	0.816465
ENSG00000047578.11	-0.00513481	0.381489
ENSG00000047621.10	0.00426353	0.673602
ENSG00000048162.18	0.0129675	0.0359122
ENSG00000048392.10	0.00171548	0.444126
ENSG00000048471.12	-0.00792869	0.28616
ENSG00000048649.12	-0.00217386	0.289328
ENSG00000048991.15	0.00849645	0.0891915
ENSG00000049130.12	-0.000880648	0.465819
ENSG00000049167.12	-0.0105062	0.807678
ENSG00000049618.20	0.00532231	0.0933679
ENSG00000049883.13	-0.000888224	0.967726
ENSG00000050130.16	0.000399069	0.943487
ENSG00000050327.13	0.00352811	0.806997
ENSG00000051009.9	-0.0116054	0.22908
ENSG00000051128.17	0.00368921	0.156489
ENSG00000051180.15	0.0236169	0.0382537
ENSG00000051620.9	0.00529802	8.11242e-05
ENSG00000052749.12	0.00266558	0.579203
ENSG00000052841.13	0.00355717	0.173198
ENSG00000053371.11	0.0019577	0.592369
ENSG00000053372.4	0.00329514	0.371352
ENSG00000053770.10	0.00581434	0.215629
ENSG00000054116.10	0.00443806	0.324556
ENSG00000054267.19	-0.00215616	0.53104
ENSG00000054282.14	-0.00513306	0.613038
ENSG00000054611.12	0.00581681	0.541155
ENSG00000054690.12	-0.00465323	0.6267
ENSG00000055070.15	0.0020515	0.510929
ENSG00000055130.14	0.000694878	0.861377
ENSG00000055147.16	-0.0172295	0.12032
ENSG00000055163.17	-0.000327447	0.890021
ENSG00000055609.16	-0.000209422	0.909026
ENSG00000055950.15	0.000158198	0.976169
ENSG00000056736.8	-3.94261e-05	0.992184
ENSG00000057019.14	0.00429056	0.303662
ENSG00000057757.8	0.00513174	0.35698
ENSG00000057935.12	-0.00181116	0.706415
ENSG00000058063.14	0.000842956	0.527885
ENSG00000058272.14	-0.000663173	0.856931
ENSG00000059377.14	0.000572287	0.955861
ENSG00000059769.18	-0.00303291	0.915516
ENSG00000060069.15	0.0251582	0.000161313
ENSG00000060491.15	-0.000499334	0.882297
ENSG00000060688.11	0.00150032	0.828997
ENSG00000060762.17	-7.11477e-05	0.993181
ENSG00000060982.13	0.0010136	0.750806
ENSG00000061794.11	-0.000756495	0.795957
ENSG00000061938.15	-0.00112562	0.70313
ENSG00000062485.17	0.00137245	0.37593
ENSG00000062650.16	-0.00266845	0.44023
ENSG00000062716.9	-0.000234635	0.673815
ENSG00000062725.8	-0.00195613	0.367945
ENSG00000063169.9	0.0174972	0.266201
ENSG00000063176.14	0.0117521	0.465875
ENSG00000063177.11	0.000249652	0.206518
ENSG00000063245.13	0.00313376	0.0215098
ENSG00000063322.12	0.00309093	0.262752
ENSG00000063854.11	-0.00299376	0.499293
ENSG00000064102.13	0.000817813	0.843844
ENSG00000064225.11	0.00294498	0.750217
ENSG00000064393.14	-0.00126322	0.395735
ENSG00000064419.12	0.00362607	0.142603
ENSG00000064489.20	-0.00455975	0.987794
ENSG00000064490.12	0.000693464	0.855413
ENSG00000064607.15	-0.00326109	0.489487
ENSG00000064651.12	0.000119885	0.79382
ENSG00000064692.17	-6.45296e-05	0.995072
ENSG00000064703.10	-0.0113107	0.408045
ENSG00000064726.8	0.000598519	0.869528
ENSG00000064763.9	-0.00556264	0.367827
ENSG00000064933.15	0.0160184	0.286503
ENSG00000065000.14	0.00275717	0.137955
ENSG00000065057.6	0.0067543	0.139316
ENSG00000065183.14	7.06312e-06	0.996336
ENSG00000065243.17	1.00268e-05	0.998162
ENSG00000065308.4	0.00502061	0.159388
ENSG00000065325.11	0.0397306	0.0942296
ENSG00000065413.15	-0.00519063	0.633359
ENSG00000065427.13	0.00215333	0.153726
ENSG00000065491.8	-0.00278187	0.816853
ENSG00000065526.9	-0.00222284	0.452354
ENSG00000065559.13	-0.00656712	0.161403
ENSG00000065621.13	-0.00581654	0.409699
ENSG00000065675.13	-0.0317938	0.3992
ENSG00000065883.13	0.00411291	0.378441
ENSG00000065911.10	0.0015807	0.257812
ENSG00000066044.12	0.00668104	0.03905
ENSG00000066136.18	0.00180962	0.62845
ENSG00000066185.11	-0.0565908	0.199221
ENSG00000066230.9	0.019205	0.569752
ENSG00000066248.13	0.009378	0.575243
ENSG00000066557.5	0.00728166	0.60115
ENSG00000066735.13	0.0204925	0.265606
ENSG00000066739.10	-0.00323078	0.573696
ENSG00000066777.7	0.0007628	0.466097
ENSG00000066923.16	-0.00510421	0.670862
ENSG00000067057.15	0.00282605	0.00481014
ENSG00000067064.9	-0.000599632	0.794679
ENSG00000067167.6	0.00149111	0.0236344
ENSG00000067221.12	0.0247387	0.0650748
ENSG00000067248.8	-0.010917	0.032504
ENSG00000067369.12	-0.00334397	0.391836
ENSG00000067560.9	-0.000550071	0.407591
ENSG00000067601.7	-0.0966088	0.547567
ENSG00000067606.14	-0.0164396	0.220225
ENSG00000068024.15	0.0124666	0.280447
ENSG00000068028.16	-0.00335949	0.705955
ENSG00000068097.13	-0.00630841	0.270054
ENSG00000068489.11	-0.000121928	0.938738
ENSG00000068650.17	0.00286889	0.388548
ENSG00000068654.14	0.00662863	0.0602095
ENSG00000068697.6	0.00128175	0.0901728
ENSG00000068878.13	0.0013714	0.151987
ENSG00000068885.13	0.0125205	0.531695
ENSG00000068903.18	0.00451929	0.207117
ENSG00000068912.12	-0.000880328	0.780837
ENSG00000068971.12	0.0101417	0.473627
ENSG00000069011.14	8.71092e-05	0.972237
ENSG00000069248.11	-0.00244619	0.462738
ENSG00000069329.14	0.002392	0.0253415
ENSG00000069345.10	0.00151184	0.393938
ENSG00000069812.10	-0.000681161	0.914614
ENSG00000069943.8	-0.0478192	0.0877186
ENSG00000069974.14	-0.0144332	0.0813318
ENSG00000070010.17	0.0079312	0.0299759
ENSG00000070061.13	0.0028725	0.571531
ENSG00000070081.14	9.13016e-05	0.891728
ENSG00000070087.12	0.00200254	0.0326409
ENSG00000070193.4	-0.000571335	0.71495
ENSG00000070366.12	-0.0183578	0.0634934
ENSG00000070367.14	0.00727408	0.0401405
ENSG00000070413.17	0.00145306	0.485699
ENSG00000070423.16	0.0144869	0.0227313
ENSG00000070495.13	0.00699664	0.437054
ENSG00000070610.13	-0.00474662	0.45271
ENSG00000070614.13	-0.00240738	0.103217
ENSG00000070718.10	0.00381363	0.146063
ENSG00000070761.6	0.0141311	0.0602062
ENSG00000070770.7	0.0041561	0.207067
ENSG00000070961.13	-0.00336001	0.390953
ENSG00000071082.9	-0.000187653	0.550203
ENSG00000071189.20	0.00199902	0.622286
ENSG00000071246.9	0.000963529	0.897377
ENSG00000071462.10	0.000230425	0.926337
ENSG00000071539.12	0.00416741	0.240266
ENSG00000071553.15	0.000620049	0.31602
ENSG00000071794.14	0.00240154	0.294681
ENSG00000071894.13	0.00370932	0.00938551
ENSG00000072110.12	0.000710938	0.132023
ENSG00000072364.11	-0.00131404	0.351051
ENSG00000072501.16	-0.000526076	0.724166
ENSG00000072571.18	0.0155565	0.0210958
ENSG00000072682.17	0.00206599	0.105663
ENSG00000072756.15	0.00267309	0.836398
ENSG00000072849.9	-0.00822824	0.279638
ENSG00000072864.11	-0.00741712	0.230849
ENSG00000072954.5	0.0086214	0.394863
ENSG00000073111.12	0.0013042	0.513753
ENSG00000073169.12	0.0127382	0.0698849
ENSG00000073331.16	-0.0185899	0.0489994
ENSG00000073578.15	0.00115216	0.476795
ENSG00000073584.17	-0.00296803	0.172622
ENSG00000073598.5	2.5667	0.0300521
ENSG00000073614.10	-0.000756213	0.769453
ENSG00000073756.10	-0.00106118	0.699256
ENSG00000073803.12	0.000341655	0.946645
ENSG00000073910.18	-0.00499344	0.243341
ENSG00000074054.16	0.00389171	0.00200425
ENSG00000074071.12	0.00215913	0.272902
ENSG00000074219.12	0.00306468	0.222355
ENSG00000074317.9	-0.255781	0.644879
ENSG00000074582.11	0.0102975	0.358337
ENSG00000074621.12	-0.0184173	0.152824
ENSG00000074695.5	0.00213347	0.0190715
ENSG00000074755.13	-0.00261554	0.562652
ENSG00000074800.12	0.000282945	0.0126698
ENSG00000074803.16	-0.00647688	0.707244
ENSG00000074855.9	0.00810816	0.324989
ENSG00000074935.12	0.0126282	0.41373
ENSG00000075089.8	0.00290766	0.737374
ENSG00000075131.8	0.00101729	0.971977
ENSG00000075188.7	0.0150114	0.23777
ENSG00000075218.17	0.0076824	0.351061
ENSG00000075239.12	0.00218334	0.440769
ENSG00000075303.11	-0.0032496	0.790736
ENSG00000075336.10	0.0161983	0.127138
ENSG00000075391.15	0.0129564	4.35932e-05
ENSG00000075399.11	0.0069232	0.59703
ENSG00000075643.5	0.0033262	0.425546
ENSG00000075702.15	0.0205367	0.000826886
ENSG00000075790.9	-0.00419702	0.366632
ENSG00000075914.11	0.00887646	0.388536
ENSG00000076053.9	0.000680688	0.958896
ENSG00000076201.13	0.000591358	0.911614
ENSG00000076242.13	-0.00786902	0.362004
ENSG00000076382.15	0.00161441	0.594367
ENSG00000076513.15	-0.00393555	0.538528
ENSG00000076604.13	-0.00104071	0.52655
ENSG00000076924.10	0.001022	0.658581
ENSG00000076944.13	-0.00123134	0.71997
ENSG00000076984.16	0.00959526	0.090827
ENSG00000077235.16	0.00158477	0.307135
ENSG00000077238.12	-0.0052861	0.183414
ENSG00000077312.7	0.00213254	0.48793
ENSG00000077348.7	0.0141471	0.0374192
ENSG00000077458.11	-0.00942657	0.568981
ENSG00000077463.13	0.020173	0.0686575
ENSG00000077514.7	-0.0130515	0.12676
ENSG00000077935.15	0.0222858	0.190317
ENSG00000078114.17	0.000671646	0.538032
ENSG00000078177.12	-0.00104957	0.886739
ENSG00000078246.14	0.0012187	0.86236
ENSG00000078369.16	-0.000394751	0.592195
ENSG00000078487.16	-0.0485389	0.148513
ENSG00000078808.15	0.00257156	0.0677886
ENSG00000078900.13	-0.018589	0.459361
ENSG00000078902.14	-0.000582821	0.859593
ENSG00000078967.11	-0.00323886	0.791503
ENSG00000079134.10	-0.00539284	0.534521
ENSG00000079739.14	0.00180595	0.301189
ENSG00000080007.7	-0.0939891	0.293824
ENSG00000080189.13	0.00499373	0.146433
ENSG00000080298.14	-0.0118574	0.276115
ENSG00000080546.12	-0.00604404	0.336042
ENSG00000080572.11	-2.99984	0.0675723
ENSG00000080603.15	-0.00156296	0.30996
ENSG00000080822.15	0.00590811	0.268433
ENSG00000080824.17	0.000204447	0.0225884
ENSG00000080839.10	0.0119427	0.0300298
ENSG00000080986.11	0.00891428	0.0912226
ENSG00000081014.9	0.0104817	0.281322
ENSG00000081019.12	-0.0135642	0.193007
ENSG00000081052.11	-0.0151915	0.540132
ENSG00000081087.13	0.00730498	0.216608
ENSG00000081870.10	0.00829897	0.316563
ENSG00000082213.16	0.00241453	0.75276
ENSG00000082258.11	-0.00351965	0.659899
ENSG00000082641.14	0.000880804	0.0625354
ENSG00000082701.13	0.00278081	0.35363
ENSG00000082805.18	0.00272734	0.285409
ENSG00000083093.8	-0.00771331	0.580619
ENSG00000083290.18	-0.00482502	0.303909
ENSG00000083307.9	0.00403353	0.0691641
ENSG00000083312.16	-0.000116102	0.955777
ENSG00000083520.13	0.00280608	0.588992
ENSG00000083535.14	0.00133332	0.920623
ENSG00000083635.7	0.00119673	0.966087
ENSG00000083720.11	0.00176324	0.530054
ENSG00000083799.16	-0.0012513	0.744406
ENSG00000083817.8	-0.0182188	0.617196
ENSG00000083937.7	-0.00138005	0.766888
ENSG00000084072.15	0.00318422	0.606624
ENSG00000084073.7	0.00223536	0.353809
ENSG00000084090.12	0.00191033	0.214733
ENSG00000084110.9	-0.0517511	0.494302
ENSG00000084463.6	0.000639651	0.478047
ENSG00000084623.10	0.000349958	0.778326
ENSG00000085231.12	-0.00108695	0.940016
ENSG00000085365.16	-0.000776752	0.77628
ENSG00000085382.10	-0.000405726	0.974062
ENSG00000085491.14	-0.00558324	0.0712409
ENSG00000085511.18	0.0174497	0.0223838
ENSG00000085721.11	0.00237659	0.540213
ENSG00000085733.14	0.000185568	0.589314
ENSG00000085840.11	0.0160253	0.146886
ENSG00000085872.13	0.00749068	0.0811265
ENSG00000086061.14	0.000329593	0.747314
ENSG00000086062.11	-0.000946637	0.130205
ENSG00000086065.12	-0.00154228	0.635239
ENSG00000086189.8	0.00593453	0.593649
ENSG00000086200.15	-0.00328481	0.699839
ENSG00000086598.9	0.000578394	0.264294
ENSG00000087206.15	-0.00827708	0.638329
ENSG00000087258.12	0.00964565	0.0691971
ENSG00000087263.15	0.008738	0.116204
ENSG00000087269.14	0.00824489	0.145213
ENSG00000087299.10	0.0191027	0.0152106
ENSG00000087301.7	0.00310806	0.355527
ENSG00000087586.16	0.00332294	0.364725
ENSG00000087884.13	-0.0087679	0.200554
ENSG00000088448.13	-0.00452073	0.161414
ENSG00000088682.12	0.00453693	0.281706
ENSG00000088727.11	-0.0445841	0.0862806
ENSG00000088756.11	0.0196698	0.00347941
ENSG00000088766.10	0.00538112	0.223833
ENSG00000088808.15	-0.00827662	0.279163
ENSG00000088836.11	0.00656222	0.009936
ENSG00000088930.7	3.03934e-05	0.990084
ENSG00000088986.9	0.00321616	0.0154552
ENSG00000088992.16	-0.0478484	0.296736
ENSG00000089006.15	0.00118878	0.586698
ENSG00000089009.14	0.000318425	0.337227
ENSG00000089022.12	0.00565427	0.515329
ENSG00000089048.13	0.000601104	0.946109
ENSG00000089053.11	0.0019535	0.468931
ENSG00000089060.10	-0.00952479	0.273685
ENSG00000089091.15	-0.0346995	0.208865
ENSG00000089094.15	0.00505757	0.446786
ENSG00000089157.14	-1.08154e-05	0.939014
ENSG00000089195.13	0.00998511	0.280043
ENSG00000089220.4	0.0004189	0.552839
ENSG00000089225.18	0.0411652	0.241954
ENSG00000089234.14	0.0043837	0.706982
ENSG00000089248.6	0.00120059	0.432543
ENSG00000089250.17	-0.00375152	0.799445
ENSG00000089335.19	-0.00240835	0.737151
ENSG00000089505.16	0.139505	0.452994
ENSG00000089737.14	-0.00209174	0.425804
ENSG00000089818.15	0.00040551	0.942752
ENSG00000089847.11	-0.103183	0.12235
ENSG00000089876.10	-0.00437012	0.432188
ENSG00000090013.8	0.000140865	0.934107
ENSG00000090060.16	0.00206208	0.170836
ENSG00000090061.16	0.00816294	0.67382
ENSG00000090238.10	-0.00327593	0.317156
ENSG00000090273.12	0.00105773	0.554564
ENSG00000090372.13	0.00372908	0.26715
ENSG00000090581.8	0.000115141	0.968835
ENSG00000090861.14	0.0015321	0.139051
ENSG00000090889.11	0.00755401	0.0606161
ENSG00000091157.12	-0.000782624	0.913294
ENSG00000091164.11	0.0029806	0.330126
ENSG00000091181.18	-0.431405	0.212391
ENSG00000091262.13	-0.0422814	0.0982942
ENSG00000091428.16	-0.000639306	0.959903
ENSG00000091640.6	-0.00510952	0.482299
ENSG00000091651.7	0.0266338	0.0187469
ENSG00000092020.9	0.0105948	0.501601
ENSG00000092094.9	-0.0173588	0.16686
ENSG00000092098.15	-0.0293579	0.0479882
ENSG00000092201.8	-0.00168933	0.332789
ENSG00000092203.12	-0.00912983	0.03504
ENSG00000092421.15	-0.00257413	0.63889
ENSG00000092531.8	-0.00584817	0.329335
ENSG00000092841.17	0.000232007	0.427831
ENSG00000092964.15	-0.000978566	0.60933
ENSG00000092969.10	-0.00058846	0.847339
ENSG00000092978.9	-0.00927725	0.142129
ENSG00000093000.17	-0.00166747	0.700343
ENSG00000093009.8	0.0109938	0.263472
ENSG00000093010.10	0.00222483	0.031598
ENSG00000093183.12	-0.00689417	0.225353
ENSG00000094916.12	0.00212105	0.0789026
ENSG00000095139.12	0.000495741	0.691467
ENSG00000095319.13	0.00298034	0.377118
ENSG00000095321.15	-0.000239433	0.75183
ENSG00000095574.10	-0.00991425	0.308003
ENSG00000095777.13	-0.0190636	0.635208
ENSG00000095787.20	0.00317422	0.0563507
ENSG00000095794.18	0.0110759	0.316354
ENSG00000096070.18	-0.00609955	0.104388
ENSG00000096696.12	-9.47185e-06	0.94465
ENSG00000096872.14	-0.00304633	0.813732
ENSG00000097021.18	0.0061669	0.117748
ENSG00000097033.13	0.00112499	0.631237
ENSG00000099194.5	-0.000448674	0.018533
ENSG00000099203.5	0.029652	0.0777873
ENSG00000099256.17	0.0114744	0.163647
ENSG00000099290.14	0.00220702	0.731897
ENSG00000099326.7	-0.00333097	0.704316
ENSG00000099331.12	0.00476174	0.0491085
ENSG00000099364.15	0.0134901	0.0231516
ENSG00000099381.15	0.00394167	0.580264
ENSG00000099625.11	0.0886597	0.291542
ENSG00000099783.10	0.00148398	0.358463
ENSG00000099840.12	-0.164583	0.0526209
ENSG00000099849.13	-0.00695696	0.178062
ENSG00000099889.12	0.00465968	0.561751
ENSG00000099910.15	0.0066032	0.432274
ENSG00000099917.16	0.00601479	0.0655384
ENSG00000099940.10	-0.00529031	0.25759
ENSG00000099953.8	0.000527052	0.0449687
ENSG00000099968.16	0.00186446	0.66175
ENSG00000099977.12	0.00299397	0.433381
ENSG00000099984.9	-1.36872	0.140275
ENSG00000099995.17	-0.00294889	0.282703
ENSG00000100014.18	-0.00439485	0.508668
ENSG00000100024.13	-0.484789	0.196152
ENSG00000100028.10	0.00155517	0.384977
ENSG00000100029.16	0.00468538	0.0136376
ENSG00000100077.13	-0.0108683	0.141533
ENSG00000100084.13	0.0357186	0.0162469
ENSG00000100099.19	-0.00519714	0.566375
ENSG00000100100.11	-0.0113649	0.0478417
ENSG00000100104.11	0.00398066	0.8273
ENSG00000100105.16	-0.00392385	0.176578
ENSG00000100109.15	-0.00926215	0.372933
ENSG00000100124.11	0.00402501	0.677432
ENSG00000100129.16	-0.00165665	0.28043
ENSG00000100209.8	-0.000737233	0.970727
ENSG00000100211.9	0.00138738	0.875407
ENSG00000100216.5	-0.000326423	0.925586
ENSG00000100218.10	0.22698	0.574164
ENSG00000100227.16	0.00136853	0.615837
ENSG00000100228.11	-0.00773479	0.345968
ENSG00000100258.16	0.00378379	0.00813799
ENSG00000100263.12	0.00723425	0.148783
ENSG00000100284.19	0.00682362	0.0191195
ENSG00000100288.18	0.00837726	0.863524
ENSG00000100312.9	0.313867	0.121462
ENSG00000100314.3	0.0283003	0.144817
ENSG00000100319.12	0.021985	0.189065
ENSG00000100345.19	0.000226664	0.156508
ENSG00000100354.19	0.00418036	0.345898
ENSG00000100380.11	-0.00101122	0.403866
ENSG00000100410.6	-0.00289181	0.76239
ENSG00000100412.14	-0.00115878	0.676589
ENSG00000100418.7	0.00547056	0.24508
ENSG00000100439.9	0.00207132	0.677255
ENSG00000100442.9	-0.000105476	0.980567
ENSG00000100461.16	-0.00984697	0.0568721
ENSG00000100462.14	-0.00314469	0.490849
ENSG00000100523.13	0.0203535	0.000554953
ENSG00000100554.10	0.00220061	0.462357
ENSG00000100565.14	1.59913	0.0237905
ENSG00000100575.12	0.00166186	0.877813
ENSG00000100577.17	-0.00432135	0.485539
ENSG00000100578.13	0.0204059	0.0432071
ENSG00000100580.7	-0.00394984	0.430379
ENSG00000100583.4	-0.0628448	0.0960296
ENSG00000100591.6	0.00236287	0.105699
ENSG00000100601.8	-0.0291539	0.223374
ENSG00000100603.12	-0.00382738	0.46457
ENSG00000100632.9	0.00130988	0.513335
ENSG00000100644.15	0.0005015	0.566284
ENSG00000100697.13	0.00254381	0.222893
ENSG00000100711.12	-0.00180573	0.719296
ENSG00000100731.14	-0.00302765	0.487721
ENSG00000100744.13	-0.00520814	0.579694
ENSG00000100784.8	-0.0192333	0.0891462
ENSG00000100811.9	0.00386795	0.188765
ENSG00000100813.13	-0.00460046	0.116239
ENSG00000100823.10	-0.000543552	0.73526
ENSG00000100852.11	-0.00110559	0.609804
ENSG00000100865.13	0.0114336	0.172138
ENSG00000100883.10	-0.000312597	0.924901
ENSG00000100890.14	0.0469309	0.268255
ENSG00000100897.16	-0.00496531	0.0976312
ENSG00000100911.12	-0.00305304	0.0363598
ENSG00000100916.12	0.0378195	0.111623
ENSG00000100938.16	-0.00959136	0.0581798
ENSG00000100941.7	-0.00407319	0.310978
ENSG00000101076.15	0.240114	0.670096
ENSG00000101079.19	-0.00172757	0.675536
ENSG00000101109.10	-0.000608396	0.899355
ENSG00000101126.14	-0.00101867	0.503598
ENSG00000101138.10	-0.00153817	0.758245
ENSG00000101144.11	-0.00749611	0.20251
ENSG00000101150.16	0.00051289	0.702813
ENSG00000101182.13	0.000997803	0.288375
ENSG00000101187.14	0.0152998	0.325566
ENSG00000101191.15	0.000878003	0.712411
ENSG00000101193.7	0.00099973	0.541496
ENSG00000101198.13	-0.00752245	0.93081
ENSG00000101199.11	0.00156104	0.36229
ENSG00000101216.9	0.0142311	0.122466
ENSG00000101224.16	0.00265326	0.0139326
ENSG00000101246.18	0.00132765	0.750069
ENSG00000101247.16	0.00304082	0.884311
ENSG00000101290.12	-0.00203148	0.500008
ENSG00000101346.10	-0.00599313	0.0707359
ENSG00000101365.19	0.00495158	0.160344
ENSG00000101407.11	-0.002189	0.646143
ENSG00000101413.10	-0.00962385	0.136128
ENSG00000101421.3	-0.00285078	0.0771602
ENSG00000101425.11	-0.00142153	0.880589
ENSG00000101452.13	-0.0355295	0.134383
ENSG00000101457.11	-0.00574852	0.439464
ENSG00000101470.8	0.0244198	0.605671
ENSG00000101473.15	0.00393459	0.702613
ENSG00000101493.9	0.00518415	0.269569
ENSG00000101546.11	0.0112872	0.259914
ENSG00000101574.13	0.0364464	0.0105899
ENSG00000101596.13	0.00192834	0.480214
ENSG00000101608.11	0.00109674	0.176817
ENSG00000101639.17	-0.00381513	0.55215
ENSG00000101654.16	0.000852469	0.848682
ENSG00000101745.14	-0.00337843	0.403167
ENSG00000101746.14	-0.103604	0.190778
ENSG00000101751.9	-0.00421771	0.539919
ENSG00000101752.10	0.000928088	0.690831
ENSG00000101843.17	0.0048705	0.315589
ENSG00000101844.16	0.0119936	0.431373
ENSG00000101850.11	-0.0390681	0.102726
ENSG00000101955.13	0.012137	0.0388818
ENSG00000101986.11	0.00540539	0.0361709
ENSG00000101997.11	-0.00639869	0.558263
ENSG00000102081.12	-0.00376158	0.451929
ENSG00000102103.14	0.00122682	0.709252
ENSG00000102125.14	0.00213893	0.834923
ENSG00000102312.19	-0.0115206	0.671191
ENSG00000102317.16	-0.00404651	0.000797552
ENSG00000102393.8	0.000717269	0.549695
ENSG00000102471.12	-0.00042723	0.94635
ENSG00000102531.15	-0.00124739	0.710848
ENSG00000102547.17	-0.0023782	0.617322
ENSG00000102572.13	-0.00113002	0.694875
ENSG00000102580.13	-0.000649521	0.727986
ENSG00000102753.8	0.00891744	0.0526181
ENSG00000102755.9	0.00114741	0.721866
ENSG00000102786.13	0.00121387	0.727078
ENSG00000102796.9	-0.0277228	0.129579
ENSG00000102871.14	0.00867356	0.29808
ENSG00000102897.8	-0.0158338	0.0939186
ENSG00000102900.11	0.00664121	0.0555182
ENSG00000102904.13	-0.162563	0.0820202
ENSG00000102921.6	-0.00146341	0.719747
ENSG00000102974.13	-0.00396451	0.441165
ENSG00000102977.12	0.0127905	0.266126
ENSG00000102981.8	0.00335211	0.87785
ENSG00000103005.10	0.00394129	0.196697
ENSG00000103035.9	0.00493454	0.174518
ENSG00000103051.17	0.009856	0.0177616
ENSG00000103061.10	0.00872621	0.875488
ENSG00000103145.9	0.00112683	0.616415
ENSG00000103152.10	0.0017033	0.802376
ENSG00000103160.10	-0.00131405	0.845545
ENSG00000103174.10	0.00998614	0.541856
ENSG00000103197.15	-0.00061521	0.849476
ENSG00000103227.17	-0.000248602	0.977478
ENSG00000103248.16	0.0196018	0.147498
ENSG00000103253.16	0.00553269	0.288747
ENSG00000103266.9	0.00276416	0.509419
ENSG00000103275.17	0.00236851	0.287556
ENSG00000103326.9	0.00816717	0.11446
ENSG00000103343.11	-0.023595	0.265971
ENSG00000103353.14	0.000983228	0.731778
ENSG00000103356.14	-0.00144993	0.774812
ENSG00000103363.13	0.00046004	0.56302
ENSG00000103423.12	0.00200416	0.536198
ENSG00000103429.9	-0.00291799	0.584911
ENSG00000103494.11	0.0232974	0.0833312
ENSG00000103502.12	0.00119001	0.617703
ENSG00000103549.20	-0.00387612	0.196615
ENSG00000103591.11	-0.00509326	0.161045
ENSG00000103599.18	-0.0715852	0.132628
ENSG00000103671.8	-0.0214204	0.127175
ENSG00000103710.9	0.00928049	0.238435
ENSG00000103852.11	-0.0163213	0.233323
ENSG00000103942.11	-0.00430492	0.277069
ENSG00000103966.8	-0.00269957	0.534669
ENSG00000103978.14	-0.000176537	0.925433
ENSG00000103994.15	-6.3162e-05	0.982407
ENSG00000103995.12	0.0378332	0.146412
ENSG00000104043.13	-0.0249176	0.461059
ENSG00000104047.13	-0.0160373	0.254922
ENSG00000104064.15	0.00626212	0.330778
ENSG00000104129.8	0.00521625	0.665971
ENSG00000104131.11	0.00438263	0.240416
ENSG00000104140.6	0.00200793	0.317981
ENSG00000104147.7	0.0908995	0.00945818
ENSG00000104164.9	0.00406894	0.516031
ENSG00000104228.11	0.00196308	0.900352
ENSG00000104231.9	0.00798894	0.0999446
ENSG00000104299.13	-0.0127203	0.349253
ENSG00000104312.7	0.00575971	0.0613564
ENSG00000104356.9	0.0215471	0.00439877
ENSG00000104365.12	0.00145043	0.354799
ENSG00000104369.4	0.00200004	0.69619
ENSG00000104375.14	0.00716844	0.0953747
ENSG00000104381.11	-0.00173909	0.478516
ENSG00000104388.13	0.00148543	0.112056
ENSG00000104490.16	0.000776429	0.0488413
ENSG00000104549.10	0.000745102	0.418072
ENSG00000104643.8	0.00998391	0.458624
ENSG00000104671.6	-0.00380426	0.690688
ENSG00000104689.8	0.0113984	0.424953
ENSG00000104714.12	-0.0081027	0.700666
ENSG00000104722.12	0.048417	0.318254
ENSG00000104738.15	0.00105987	0.171215
ENSG00000104756.14	0.00529555	0.316258
ENSG00000104763.16	-0.000401613	0.326966
ENSG00000104765.13	-0.000221426	0.892356
ENSG00000104774.11	0.00252082	0.295347
ENSG00000104812.13	0.00588116	0.178631
ENSG00000104814.11	-0.00185613	0.857988
ENSG00000104825.15	0.00630843	0.334386
ENSG00000104835.13	0.024342	0.373371
ENSG00000104853.14	0.00146043	0.282431
ENSG00000104872.9	0.00437773	0.240069
ENSG00000104880.16	-0.00365544	0.908033
ENSG00000104881.13	0.00512516	0.125044
ENSG00000104885.16	0.0218267	0.00225563
ENSG00000104892.15	0.0110943	0.217806
ENSG00000104897.8	0.00531573	0.0390659
ENSG00000104901.5	0.0842645	0.427807
ENSG00000104904.11	0.000741311	0.143275
ENSG00000104907.11	0.0109551	0.0175476
ENSG00000104915.13	0.0131854	0.00151297
ENSG00000104946.9	-0.00354646	0.563116
ENSG00000104951.14	-0.00530669	0.502921
ENSG00000104960.14	0.00187878	0.206904
ENSG00000104973.13	0.0016216	0.695424
ENSG00000104979.7	0.00184171	0.348555
ENSG00000104998.3	0.000838103	0.771039
ENSG00000105011.7	0.00439843	0.333972
ENSG00000105053.9	-0.0166568	0.0974016
ENSG00000105072.7	0.0342012	0.00150138
ENSG00000105127.7	-0.0128861	0.256508
ENSG00000105193.7	0.000313591	0.067746
ENSG00000105220.13	0.00119459	0.00298796
ENSG00000105223.17	0.00124461	0.0573769
ENSG00000105248.14	0.00268156	0.808725
ENSG00000105281.11	0.000833012	0.389853
ENSG00000105376.4	0.032669	0.150068
ENSG00000105443.12	0.00191822	0.507188
ENSG00000105467.7	-0.0466224	0.744003
ENSG00000105479.14	-0.0521683	0.331812
ENSG00000105483.15	-0.00453382	0.615227
ENSG00000105486.12	0.00180778	0.732574
ENSG00000105516.9	0.00104922	0.911578
ENSG00000105612.7	0.00338971	0.120316
ENSG00000105618.12	0.00426856	0.13182
ENSG00000105619.12	0.00972475	0.0526182
ENSG00000105641.3	0.0214884	0.37624
ENSG00000105649.8	0.0269492	0.039487
ENSG00000105669.11	0.00166978	0.231869
ENSG00000105671.10	0.00293406	0.285052
ENSG00000105676.12	0.00717441	0.151005
ENSG00000105677.10	0.00468973	0.00519582
ENSG00000105696.7	0.0670929	0.0542373
ENSG00000105705.14	0.000944778	0.92699
ENSG00000105723.10	0.00371434	0.376856
ENSG00000105738.9	0.00294159	0.0418748
ENSG00000105778.16	-0.00117003	0.637872
ENSG00000105810.8	0.00425094	0.00282901
ENSG00000105821.13	0.00347642	0.556825
ENSG00000105825.10	-0.00340711	0.233037
ENSG00000105835.10	-0.00113867	0.42355
ENSG00000105879.10	-0.00622127	0.419213
ENSG00000105968.17	0.000767961	0.714453
ENSG00000105971.13	0.00366313	0.291985
ENSG00000105982.15	0.00536117	0.926772
ENSG00000105991.7	-0.145856	0.34523
ENSG00000106028.9	0.00269725	0.369
ENSG00000106031.7	-0.175666	0.177256
ENSG00000106080.9	0.0113981	0.0604656
ENSG00000106086.17	0.00861067	0.203689
ENSG00000106105.12	0.00155575	0.0818278
ENSG00000106144.18	0.0021691	0.501601
ENSG00000106244.11	0.00156607	0.451545
ENSG00000106245.8	-0.00094707	0.867652
ENSG00000106263.16	0.00178715	0.0261854
ENSG00000106266.7	0.00728727	0.0985702
ENSG00000106268.14	0.00831516	0.248024
ENSG00000106290.13	-0.00673545	0.396368
ENSG00000106299.7	0.00227033	0.429075
ENSG00000106305.8	0.0263492	0.00731262
ENSG00000106344.7	0.00905843	0.0669795
ENSG00000106355.8	-0.00154859	0.714998
ENSG00000106397.10	0.00189326	0.185143
ENSG00000106400.10	0.00231874	0.278485
ENSG00000106459.13	-0.0066706	0.823986
ENSG00000106524.7	-0.0222755	0.11081
ENSG00000106538.8	0.00304898	0.00318252
ENSG00000106546.11	-0.00236301	0.205714
ENSG00000106554.10	1.52334e-05	0.997673
ENSG00000106565.16	-8.70073e-05	0.950255
ENSG00000106588.9	0.0166639	0.131364
ENSG00000106591.3	0.00765082	0.183802
ENSG00000106608.15	0.00681199	0.350466
ENSG00000106610.13	0.0195829	0.526214
ENSG00000106617.12	-0.0049159	0.628166
ENSG00000106692.12	0.0130313	0.091689
ENSG00000106733.19	0.0095369	0.391487
ENSG00000106803.8	0.00355767	0.0809567
ENSG00000106993.10	-0.00917121	0.463946
ENSG00000107099.14	-0.00615798	0.134379
ENSG00000107175.9	-0.0010942	0.77504
ENSG00000107185.9	0.00530644	0.188262
ENSG00000107262.15	0.000105748	0.927558
ENSG00000107282.6	0.00459043	0.555327
ENSG00000107362.12	0.011927	0.371285
ENSG00000107371.11	-0.00419211	0.632949
ENSG00000107485.14	-0.000351149	0.167944
ENSG00000107551.19	0.000835783	0.735358
ENSG00000107560.9	-0.0154019	0.302184
ENSG00000107651.11	-0.00634663	0.0809361
ENSG00000107669.16	-0.00372952	0.526217
ENSG00000107758.14	-0.0136675	0.0226157
ENSG00000107779.10	-0.00507672	0.529093
ENSG00000107796.11	-3.98763e-05	0.927914
ENSG00000107798.16	-0.00212117	0.269792
ENSG00000107807.11	-0.0187843	0.360501
ENSG00000107815.6	0.00263344	0.825302
ENSG00000107819.12	0.00832169	0.0555688
ENSG00000107821.13	0.00667582	0.0388345
ENSG00000107854.5	-0.000484031	0.878479
ENSG00000107864.13	-0.0260171	0.242391
ENSG00000107897.17	0.00783119	0.029058
ENSG00000107937.17	0.0024925	0.125881
ENSG00000107938.16	-0.000807975	0.947442
ENSG00000107949.15	-0.00382455	0.383789
ENSG00000107984.8	0.00478622	0.244958
ENSG00000108061.10	-0.00726575	0.0382704
ENSG00000108107.11	5.19056e-05	0.805648
ENSG00000108306.10	-0.00287776	0.294519
ENSG00000108312.13	-0.00328395	0.21236
ENSG00000108342.11	0.0121053	0.79191
ENSG00000108379.8	0.00658321	0.561603
ENSG00000108384.13	-0.0130964	0.197253
ENSG00000108395.12	-0.00331056	0.307035
ENSG00000108423.13	-0.00574948	0.637368
ENSG00000108424.8	-9.2445e-05	0.930349
ENSG00000108433.14	-0.0023966	0.866541
ENSG00000108439.8	0.00327976	0.249875
ENSG00000108443.12	-0.000898952	0.65698
ENSG00000108469.13	-0.0111594	0.198031
ENSG00000108474.15	-0.0173501	0.548987
ENSG00000108509.19	0.00422248	0.420092
ENSG00000108515.16	0.0133579	0.355996
ENSG00000108518.7	0.000555301	0.184892
ENSG00000108523.14	9.87889e-05	0.97153
ENSG00000108528.12	0.0051252	0.205345
ENSG00000108559.10	0.00316995	0.631349
ENSG00000108590.9	0.0248744	0.667425
ENSG00000108641.13	-0.0174033	0.299434
ENSG00000108666.8	-0.00763231	0.473192
ENSG00000108733.8	-0.0328532	0.0889629
ENSG00000108759.3	-0.475328	0.017074
ENSG00000108773.9	0.0041191	0.130971
ENSG00000108774.13	-0.00126228	0.645615
ENSG00000108798.7	-0.00257194	0.870803
ENSG00000108825.16	1.67505	0.00478046
ENSG00000108826.14	-0.00166878	0.575483
ENSG00000108828.14	0.00180979	0.0178525
ENSG00000108830.9	0.00770264	0.519963
ENSG00000108839.10	0.0449603	0.0313062
ENSG00000108883.11	0.00233284	0.350994
ENSG00000109046.13	-0.0019718	0.589758
ENSG00000109062.8	-0.000292675	0.395068
ENSG00000109065.10	-0.00606327	0.416677
ENSG00000109066.12	-0.0072917	0.354778
ENSG00000109072.12	0.0110477	0.0203965
ENSG00000109079.8	0.000324454	0.900319
ENSG00000109083.12	-0.00537288	0.691514
ENSG00000109111.13	-0.00199637	0.23315
ENSG00000109113.16	-0.00216318	0.432939
ENSG00000109158.9	0.549748	0.188142
ENSG00000109189.11	0.0111683	0.133848
ENSG00000109320.10	-0.00307572	0.38818
ENSG00000109332.18	0.000285139	0.844182
ENSG00000109339.17	0.0188575	0.031697
ENSG00000109436.7	0.000112515	0.64706
ENSG00000109466.12	-0.0136728	0.220453
ENSG00000109475.15	-0.00032854	0.504968
ENSG00000109534.15	0.00733308	0.305193
ENSG00000109536.10	-0.0108124	0.343044
ENSG00000109572.12	0.000733916	0.650852
ENSG00000109586.10	-0.000232731	0.799724
ENSG00000109618.10	-0.00977022	0.511436
ENSG00000109670.12	0.0011852	0.909259
ENSG00000109684.13	-0.107372	0.44026
ENSG00000109736.13	0.0044552	0.01371
ENSG00000109771.14	0.0106783	0.815312
ENSG00000109775.9	-0.012979	0.36596
ENSG00000109787.11	-0.0004845	0.914515
ENSG00000109805.8	0.00708493	0.215287
ENSG00000109814.10	-0.00200836	0.0567057
ENSG00000109832.11	0.0825856	0.100999
ENSG00000109911.16	0.0217922	0.202537
ENSG00000110025.11	-0.580833	0.0405997
ENSG00000110031.11	-0.0115595	0.174616
ENSG00000110046.11	-0.000864038	0.902019
ENSG00000110048.10	-0.00264931	0.35125
ENSG00000110060.7	0.0122177	0.306343
ENSG00000110063.7	0.0146842	0.034459
ENSG00000110074.9	0.00114429	0.801541
ENSG00000110080.17	0.0010605	0.638967
ENSG00000110104.10	0.00702652	0.172846
ENSG00000110107.7	-0.00127618	0.375575
ENSG00000110108.8	0.000940803	0.597722
ENSG00000110172.10	0.0103962	0.000510144
ENSG00000110315.5	-0.0096083	0.0117613
ENSG00000110321.14	-0.000236979	0.501076
ENSG00000110367.10	0.000629492	0.702322
ENSG00000110375.2	0.00209904	0.918148
ENSG00000110400.9	0.00103749	0.487648
ENSG00000110429.12	-0.00212497	0.696418
ENSG00000110435.10	0.000248923	0.952803
ENSG00000110536.12	-0.0169464	0.212808
ENSG00000110660.13	0.0040351	0.363176
ENSG00000110713.14	-0.00356985	0.18257
ENSG00000110717.9	-1.57005e-05	0.991791
ENSG00000110721.10	-0.00691957	0.213763
ENSG00000110756.16	-0.0061181	0.490345
ENSG00000110768.10	0.00119688	0.870789
ENSG00000110844.12	-0.0426923	0.167258
ENSG00000110871.13	0.00914656	0.263186
ENSG00000110888.16	-0.0272219	0.105813
ENSG00000110906.11	0.00842643	0.0503864
ENSG00000110921.10	0.00624269	0.297678
ENSG00000110944.7	-0.0423256	0.643055
ENSG00000110987.7	0.0070341	0.309165
ENSG00000111011.16	-0.00113808	0.845051
ENSG00000111058.6	-0.0033953	0.455122
ENSG00000111110.10	-0.00117144	0.611427
ENSG00000111199.9	0.00328478	0.533599
ENSG00000111203.10	-0.00870715	0.466314
ENSG00000111206.11	0.00174868	0.30809
ENSG00000111215.10	-0.0190707	0.646082
ENSG00000111231.7	0.00335494	0.805304
ENSG00000111237.17	0.00625533	0.230989
ENSG00000111247.13	0.00325512	0.690309
ENSG00000111254.6	0.032034	0.504183
ENSG00000111271.13	0.0112176	0.164043
ENSG00000111358.12	0.00776911	0.353396
ENSG00000111361.11	0.00786996	0.143875
ENSG00000111412.5	0.00399794	0.0633364
ENSG00000111432.4	-0.00769772	0.677991
ENSG00000111481.8	9.37765e-05	0.948178
ENSG00000111540.14	-0.00160034	0.299213
ENSG00000111596.10	0.000338532	0.920711
ENSG00000111639.6	-0.000141366	0.950212
ENSG00000111640.13	5.96959e-05	0.272391
ENSG00000111647.11	-0.00460529	0.500692
ENSG00000111653.18	-0.00382807	0.592361
ENSG00000111665.10	0.00368067	0.529781
ENSG00000111666.9	-0.00565609	0.00736555
ENSG00000111667.12	0.0022732	0.271516
ENSG00000111696.10	-0.0059969	0.591348
ENSG00000111707.10	-1.14853e-05	0.99742
ENSG00000111711.8	0.00163772	0.359249
ENSG00000111725.9	-0.0185102	0.0343167
ENSG00000111727.10	-0.0139203	0.411356
ENSG00000111737.10	0.0112275	0.0770842
ENSG00000111785.17	0.00451093	0.687191
ENSG00000111786.7	-0.000592264	0.87874
ENSG00000111790.12	-0.013227	0.184996
ENSG00000111802.12	-0.00250059	0.682862
ENSG00000111817.15	-0.00117926	0.817411
ENSG00000111845.4	0.00354597	0.590143
ENSG00000111877.16	-0.0105803	0.370722
ENSG00000111880.14	0.0102763	0.344966
ENSG00000111897.6	-0.000649615	0.430861
ENSG00000111913.14	-0.0172361	0.14618
ENSG00000112029.8	0.0127394	0.235632
ENSG00000112078.12	0.000611436	0.823256
ENSG00000112110.8	0.00911073	0.0260065
ENSG00000112237.11	0.00277976	0.336436
ENSG00000112249.12	0.00152123	0.547028
ENSG00000112276.12	-0.0282812	0.308153
ENSG00000112282.16	-0.000876546	0.85386
ENSG00000112290.11	0.0132671	0.146312
ENSG00000112293.13	-0.0727026	0.401959
ENSG00000112294.11	-0.000505886	0.917219
ENSG00000112304.9	0.00190333	0.784962
ENSG00000112333.10	-0.0144452	0.877206
ENSG00000112367.9	-0.00624901	0.350054
ENSG00000112425.12	0.00647062	0.841372
ENSG00000112473.15	0.000992817	0.322184
ENSG00000112530.10	-0.144616	0.406599
ENSG00000112531.15	0.00386403	0.0729404
ENSG00000112541.12	0.00551742	0.231715
ENSG00000112576.11	-0.000480181	0.823379
ENSG00000112578.8	0.000898066	0.42676
ENSG00000112592.11	0.032831	0.108833
ENSG00000112624.11	0.00115909	0.769202
ENSG00000112697.14	0.000161924	0.904073
ENSG00000112699.9	0.00336649	0.331393
ENSG00000112739.15	-0.00236247	0.519988
ENSG00000112855.13	0.000316408	0.970263
ENSG00000112877.7	-0.026104	0.410373
ENSG00000112902.10	-0.000232753	0.911893
ENSG00000112977.14	-0.000598581	0.614484
ENSG00000112983.16	-0.00463282	0.374261
ENSG00000112984.10	0.00621428	0.0690968
ENSG00000112992.15	3.05503e-05	0.991466
ENSG00000112996.8	-0.000390949	0.523416
ENSG00000113048.15	0.000863671	0.847492
ENSG00000113141.14	-0.00389884	0.242066
ENSG00000113161.14	-0.00285876	0.436255
ENSG00000113163.14	-0.00747154	0.20556
ENSG00000113248.5	0.0829323	0.10653
ENSG00000113263.11	-0.0175375	0.210939
ENSG00000113296.13	-0.00131453	0.345142
ENSG00000113318.9	-0.0182653	0.0916058
ENSG00000113319.10	-0.00612266	0.57338
ENSG00000113328.17	-0.00400904	0.170798
ENSG00000113360.15	0.00353281	0.311492
ENSG00000113368.10	0.00359875	0.074876
ENSG00000113384.12	0.000621945	0.742083
ENSG00000113407.12	0.00248588	0.139831
ENSG00000113430.8	0.0235317	0.0299778
ENSG00000113441.14	-0.00408874	0.12154
ENSG00000113522.12	-0.00254432	0.364715
ENSG00000113525.8	0.199071	0.856553
ENSG00000113575.8	-0.00116797	0.563537
ENSG00000113593.10	-0.0351146	0.0824643
ENSG00000113615.11	0.00219663	0.62687
ENSG00000113648.15	-0.0002064	0.862968
ENSG00000113712.15	-0.000974853	0.595309
ENSG00000113734.16	0.0257931	0.243158
ENSG00000113761.10	-0.0142695	0.528438
ENSG00000113790.9	-0.00475271	0.756382
ENSG00000113810.14	0.00167269	0.420159
ENSG00000113845.8	0.00708209	0.123493
ENSG00000113946.3	0.0113698	0.711165
ENSG00000113971.17	-0.0376481	0.318864
ENSG00000114023.14	-0.00318768	0.355398
ENSG00000114209.13	0.00301739	0.595266
ENSG00000114302.14	-0.000357546	0.915414
ENSG00000114388.11	-0.0117698	0.271506
ENSG00000114395.9	-0.0133101	0.116443
ENSG00000114473.12	0.00250065	0.649235
ENSG00000114503.9	0.00195594	0.425842
ENSG00000114573.8	0.00238518	0.19055
ENSG00000114648.10	0.00666509	0.695958
ENSG00000114670.12	-0.03931	0.0026295
ENSG00000114737.14	-0.00455213	0.0895641
ENSG00000114738.9	-0.00495756	0.40225
ENSG00000114739.12	0.00283305	0.753276
ENSG00000114745.12	-0.00733077	0.349822
ENSG00000114767.6	0.017032	0.0110533
ENSG00000114779.18	0.00162529	0.53269
ENSG00000114784.3	-0.017965	0.123557
ENSG00000114790.11	-0.00317719	0.545881
ENSG00000114853.12	0.0159369	0.231898
ENSG00000114857.16	-0.00417096	0.220544
ENSG00000114859.13	-0.00906191	0.566785
ENSG00000114861.17	-0.00134848	0.553662
ENSG00000114923.15	0.00632529	0.583044
ENSG00000114942.12	7.03372e-05	0.937645
ENSG00000114982.16	-0.0108639	0.0176013
ENSG00000115020.15	-0.00454656	0.523452
ENSG00000115073.7	0.0068077	0.134496
ENSG00000115091.10	0.000873522	0.393297
ENSG00000115128.6	0.00592657	0.00843298
ENSG00000115137.10	-0.0109114	0.791296
ENSG00000115170.12	0.000541467	0.926182
ENSG00000115194.9	0.0744599	0.190403
ENSG00000115207.12	0.00752458	0.0320138
ENSG00000115211.14	0.00923796	0.180559
ENSG00000115233.10	0.00774079	0.0192243
ENSG00000115234.9	0.00321635	0.273803
ENSG00000115239.20	-0.0207727	0.593002
ENSG00000115255.9	-0.00310115	0.0701371
ENSG00000115257.14	-0.0436575	0.0805883
ENSG00000115267.5	-0.00183515	0.413519
ENSG00000115271.9	-0.0148545	0.234187
ENSG00000115282.18	0.00223163	0.882629
ENSG00000115295.18	0.00459628	0.399312
ENSG00000115307.15	0.00133821	0.470162
ENSG00000115317.10	0.0338696	0.00366198
ENSG00000115339.12	-0.00113107	0.62709
ENSG00000115365.10	-0.00428837	0.205095
ENSG00000115392.10	-0.00693258	0.487304
ENSG00000115414.17	1.27452e-05	0.566841
ENSG00000115415.17	-0.000343889	0.3166
ENSG00000115446.10	-0.0150048	0.297356
ENSG00000115459.16	-0.0192082	0.214545
ENSG00000115464.13	0.00119005	0.504983
ENSG00000115484.13	0.00285108	0.00308229
ENSG00000115486.10	0.00734388	0.0356959
ENSG00000115525.15	0.00234489	0.722707
ENSG00000115568.14	-0.010893	0.368318
ENSG00000115661.12	-0.0124765	0.226042
ENSG00000115685.13	0.00367627	0.439977
ENSG00000115687.12	-0.0201234	0.141004
ENSG00000115758.11	0.00127104	0.19526
ENSG00000115761.14	0.00257515	0.419436
ENSG00000115816.12	0.00756444	0.0779675
ENSG00000115825.8	0.00234164	0.368494
ENSG00000115827.12	-0.00720212	0.584552
ENSG00000115840.12	-0.00695631	0.430498
ENSG00000115844.9	-0.0229457	0.20181
ENSG00000115866.9	0.00174637	0.595815
ENSG00000115875.17	0.000847194	0.815669
ENSG00000115942.7	0.00449689	0.720874
ENSG00000115946.6	0.018834	0.0201145
ENSG00000115947.12	-0.0153513	0.173304
ENSG00000115956.9	-0.00647319	0.138677
ENSG00000115966.15	-0.0034035	0.568379
ENSG00000116044.14	-0.00143977	0.595338
ENSG00000116133.10	-0.000376237	0.103126
ENSG00000116138.11	-0.0247673	0.00230268
ENSG00000116151.12	-0.0773939	0.0039819
ENSG00000116171.15	-0.00316754	0.116406
ENSG00000116198.11	-0.000751454	0.922545
ENSG00000116205.9	0.0226196	0.150531
ENSG00000116209.10	0.000275381	0.706707
ENSG00000116212.13	0.00584224	0.249377
ENSG00000116213.14	-0.00209873	0.880724
ENSG00000116237.14	0.000876777	0.748733
ENSG00000116273.5	-0.0172811	0.0827922
ENSG00000116285.11	-0.00256655	0.142009
ENSG00000116299.15	-0.000159019	0.61588
ENSG00000116455.12	0.00559215	0.509587
ENSG00000116459.9	-0.000121957	0.960611
ENSG00000116539.9	-0.00125661	0.41793
ENSG00000116580.17	-0.00715408	0.148997
ENSG00000116586.10	0.00234868	0.327708
ENSG00000116641.14	0.00539899	0.0101537
ENSG00000116667.11	-0.00142305	0.225726
ENSG00000116668.11	0.0236498	0.341338
ENSG00000116670.13	0.00398779	0.387912
ENSG00000116679.14	0.00103589	0.426973
ENSG00000116698.19	0.000698716	0.743466
ENSG00000116747.11	0.00496436	0.0986703
ENSG00000116750.12	0.00595562	0.129418
ENSG00000116754.12	-0.000467216	0.838391
ENSG00000116791.12	-0.0149153	0.0187128
ENSG00000116830.10	0.00555513	0.308142
ENSG00000116852.13	-0.00990687	0.469094
ENSG00000116871.14	0.00529753	0.0359361
ENSG00000116874.10	-0.00761821	0.427257
ENSG00000116883.8	-0.0113491	0.637673
ENSG00000116903.7	0.00584525	0.526816
ENSG00000116906.10	-0.000370918	0.919705
ENSG00000116918.12	-0.00441069	0.391868
ENSG00000116922.13	0.00884802	0.523198
ENSG00000116954.7	0.0103096	0.247534
ENSG00000116983.11	-0.228775	0.489707
ENSG00000116985.9	0.00592771	0.489285
ENSG00000117054.12	-0.0160435	0.00393914
ENSG00000117143.12	0.000774522	0.604824
ENSG00000117262.17	0.00334704	0.913172
ENSG00000117385.14	0.00267093	0.00231938
ENSG00000117394.18	0.000822067	0.223413
ENSG00000117395.9	0.00340791	0.280429
ENSG00000117399.12	0.00422994	0.0149541
ENSG00000117408.9	0.00905237	0.0740326
ENSG00000117475.12	0.00753917	0.245324
ENSG00000117479.11	-0.003245	0.165381
ENSG00000117500.11	0.000835892	0.782643
ENSG00000117505.11	0.00359941	0.282767
ENSG00000117519.14	-0.000782888	0.428771
ENSG00000117543.18	0.0090299	0.481641
ENSG00000117593.9	0.00511526	0.102164
ENSG00000117598.10	-0.109447	0.682058
ENSG00000117616.16	-0.00827091	0.186208
ENSG00000117620.11	0.00226242	0.416241
ENSG00000117650.11	0.00242557	0.582958
ENSG00000117697.13	-0.0106388	0.264544
ENSG00000117862.10	0.00363116	0.302911
ENSG00000117877.9	0.0369974	0.0308748
ENSG00000117984.11	-0.000101243	0.349107
ENSG00000118007.11	-0.00282322	0.634684
ENSG00000118096.6	-0.0152381	0.0241542
ENSG00000118162.12	-2.41028e-05	0.998923
ENSG00000118181.9	-0.000318864	0.519304
ENSG00000118197.12	-0.00486951	0.643419
ENSG00000118217.5	-0.00150954	0.532533
ENSG00000118246.12	0.00199349	0.813986
ENSG00000118260.13	-0.00171826	0.777688
ENSG00000118276.10	0.0450754	0.117039
ENSG00000118298.9	-0.025726	0.49527
ENSG00000118307.17	-0.117996	0.017591
ENSG00000118363.10	-0.00758246	0.142557
ENSG00000118369.11	-0.0254693	0.0644843
ENSG00000118454.11	0.00679515	0.54641
ENSG00000118492.15	-1.1632	0.0885714
ENSG00000118523.5	7.36554e-05	0.759944
ENSG00000118564.13	-0.00355748	0.122926
ENSG00000118579.10	-0.00419955	0.485648
ENSG00000118640.9	-0.000736227	0.662588
ENSG00000118655.4	0.000248005	0.965421
ENSG00000118680.11	0.000647389	0.30326
ENSG00000118707.8	0.000110722	0.976536
ENSG00000118849.8	0.000325229	0.384628
ENSG00000118855.17	-0.000981672	0.753884
ENSG00000118894.13	0.0141505	0.438584
ENSG00000118900.13	-0.0018199	0.552352
ENSG00000118939.16	0.01306	0.478542
ENSG00000118965.13	0.00392468	0.583226
ENSG00000118985.13	-0.00197434	0.447394
ENSG00000119013.7	0.00460748	0.540703
ENSG00000119048.6	-0.0059321	0.271677
ENSG00000119185.11	0.00928205	0.0924106
ENSG00000119203.12	0.00227749	0.575856
ENSG00000119242.7	0.00465074	0.416158
ENSG00000119321.7	0.0028129	0.655138
ENSG00000119328.10	0.0033479	0.787117
ENSG00000119383.18	0.000758633	0.474553
ENSG00000119402.15	0.00224879	0.463055
ENSG00000119421.6	0.00632732	0.1239
ENSG00000119446.12	-0.00150686	0.786475
ENSG00000119509.11	0.0409005	0.0387918
ENSG00000119523.9	0.00716684	0.215811
ENSG00000119537.14	0.000833853	0.802449
ENSG00000119616.10	0.0114621	0.11676
ENSG00000119636.14	-0.0440115	0.000502447
ENSG00000119638.11	-0.0043	0.212559
ENSG00000119655.7	-0.000758209	0.574832
ENSG00000119669.4	0.00200965	0.506034
ENSG00000119682.15	0.00632461	0.342418
ENSG00000119686.8	-0.00195492	0.930382
ENSG00000119688.19	-0.0112013	0.329704
ENSG00000119705.8	0.00498658	0.22378
ENSG00000119707.12	-0.00139399	0.690664
ENSG00000119711.11	-0.00210654	0.586256
ENSG00000119715.13	-0.258987	0.16955
ENSG00000119723.14	-0.0148244	0.464989
ENSG00000119729.9	0.00693521	0.125972
ENSG00000119760.14	0.0210025	0.0105308
ENSG00000119778.13	0.0151284	0.0748999
ENSG00000119782.12	0.0440959	0.452663
ENSG00000119844.13	-0.00584252	0.208071
ENSG00000119862.11	0.00510542	0.44994
ENSG00000119878.5	0.0176635	0.0602921
ENSG00000119888.9	0.00130103	0.0127617
ENSG00000119906.10	-0.00440615	0.4587
ENSG00000119965.11	0.00238997	0.862663
ENSG00000120008.14	-0.0107561	0.0635741
ENSG00000120051.13	0.0386811	0.165391
ENSG00000120053.10	-0.0010765	0.81992
ENSG00000120253.12	0.0014976	0.781629
ENSG00000120256.8	0.00398705	0.0926341
ENSG00000120265.15	0.00340261	0.219921
ENSG00000120334.14	0.017075	0.207904
ENSG00000120370.11	0.00250184	0.880099
ENSG00000120438.10	0.0020245	0.0179045
ENSG00000120458.8	-0.0158553	0.585368
ENSG00000120509.9	-0.00153775	0.776459
ENSG00000120526.9	0.0054025	0.227908
ENSG00000120533.11	0.00241838	0.42013
ENSG00000120539.13	0.0100289	0.131588
ENSG00000120647.8	0.00952997	0.317186
ENSG00000120656.10	0.0130407	0.214251
ENSG00000120658.11	7.00028e-05	0.996463
ENSG00000120685.18	0.00484367	0.202691
ENSG00000120688.8	0.00387618	0.876066
ENSG00000120690.12	-0.00162014	0.541461
ENSG00000120725.11	0.00177657	0.320631
ENSG00000120742.9	-0.00114167	0.250977
ENSG00000120802.12	0.000966318	0.527757
ENSG00000120820.11	0.0039361	0.549611
ENSG00000120868.12	0.00126101	0.89005
ENSG00000120889.11	0.00303476	0.467495
ENSG00000120896.12	0.000962865	0.634829
ENSG00000120899.16	-0.000210917	0.967362
ENSG00000120925.12	0.00544952	0.267927
ENSG00000121057.11	-0.00149406	0.485351
ENSG00000121060.13	0.00677235	0.0397964
ENSG00000121068.12	0.017563	3.99294e-05
ENSG00000121073.12	-0.000200285	0.925965
ENSG00000121101.14	0.000768209	0.843855
ENSG00000121104.6	-0.0130117	0.229498
ENSG00000121289.16	0.00662129	0.274729
ENSG00000121297.6	0.00289127	0.793129
ENSG00000121310.15	-0.00541988	0.156815
ENSG00000121316.9	-0.000107757	0.970188
ENSG00000121440.13	-0.00524938	0.292761
ENSG00000121486.10	0.00288032	0.666384
ENSG00000121579.11	0.00218966	0.0481453
ENSG00000121621.6	0.019526	0.108056
ENSG00000121766.13	0.0006107	0.931517
ENSG00000121797.9	-0.0251566	0.521929
ENSG00000121851.11	-0.0236025	0.0711785
ENSG00000121879.3	0.00390187	0.47906
ENSG00000121897.12	0.0173754	0.585813
ENSG00000121931.14	0.002754	0.79377
ENSG00000121988.16	0.0231243	0.533381
ENSG00000122008.14	-0.0160421	0.157062
ENSG00000122026.9	-0.00170442	0.155233
ENSG00000122218.13	0.000268019	0.615561
ENSG00000122299.10	-0.0107725	0.116702
ENSG00000122335.12	0.0136934	0.36072
ENSG00000122376.10	-0.00721586	0.385224
ENSG00000122390.16	0.00450008	0.465516
ENSG00000122432.15	0.223667	0.0883864
ENSG00000122435.8	0.00587785	0.825985
ENSG00000122481.15	-0.0210441	0.679933
ENSG00000122483.16	0.0140237	0.374146
ENSG00000122484.8	0.00407849	0.610961
ENSG00000122507.19	-0.000693476	0.969589
ENSG00000122512.13	0.00760146	0.661379
ENSG00000122545.16	0.00338912	0.111069
ENSG00000122548.5	-0.327248	0.462913
ENSG00000122550.16	0.000694668	0.848527
ENSG00000122557.8	0.0175554	0.12343
ENSG00000122565.17	0.00017709	0.760754
ENSG00000122566.19	-6.72546e-05	0.896511
ENSG00000122592.7	-0.0105292	0.759116
ENSG00000122687.16	0.00269252	0.77102
ENSG00000122741.14	-0.00200602	0.118874
ENSG00000122787.13	-0.231813	0.364366
ENSG00000122882.9	-0.0151848	0.0842812
ENSG00000123064.11	0.00866906	0.00715076
ENSG00000123080.9	-0.000555574	0.930254
ENSG00000123094.14	-0.00514859	0.287698
ENSG00000123119.10	-0.0162804	0.430276
ENSG00000123124.12	-0.00128642	0.106088
ENSG00000123154.10	-0.00090862	0.969618
ENSG00000123191.12	-0.00329608	0.403897
ENSG00000123200.15	-0.000949153	0.742745
ENSG00000123213.21	0.00585474	0.214916
ENSG00000123219.11	0.0140179	0.550788
ENSG00000123240.15	0.000266543	0.868367
ENSG00000123353.8	-0.00225596	0.741407
ENSG00000123364.4	0.0122497	0.136289
ENSG00000123405.12	-0.0897767	0.175297
ENSG00000123472.11	-0.001745	0.727293
ENSG00000123562.15	-0.000568433	0.365037
ENSG00000123600.17	0.00916845	0.410788
ENSG00000123684.11	-1.94298e-05	0.985364
ENSG00000123700.4	0.00470792	0.162605
ENSG00000123908.10	0.00414609	0.00397031
ENSG00000123989.12	0.0023524	0.001759
ENSG00000124074.10	0.0093024	0.314857
ENSG00000124104.17	0.00214421	0.864015
ENSG00000124116.17	-0.0296499	0.739456
ENSG00000124140.11	0.030926	0.253542
ENSG00000124201.13	-0.00409232	0.054979
ENSG00000124207.15	-5.38805e-05	0.948715
ENSG00000124209.3	-0.00148356	0.614539
ENSG00000124217.4	-0.00220051	0.833205
ENSG00000124224.15	0.0265937	0.406079
ENSG00000124249.6	0.00038466	0.933548
ENSG00000124275.13	-0.00643897	0.276582
ENSG00000124357.11	0.00118829	0.739153
ENSG00000124370.9	-0.00930333	0.673183
ENSG00000124383.7	0.00641601	0.184104
ENSG00000124406.15	0.00443034	0.393854
ENSG00000124444.14	-0.00614767	0.781326
ENSG00000124571.16	0.00205312	0.0940027
ENSG00000124635.8	-0.0017257	0.931299
ENSG00000124641.13	0.0018185	0.564273
ENSG00000124659.6	0.00111041	0.766744
ENSG00000124688.12	0.000963348	0.927667
ENSG00000124702.16	0.00116359	0.296549
ENSG00000124721.16	0.0170176	0.902291
ENSG00000124733.3	-0.00114863	0.717748
ENSG00000124784.7	0.00208811	0.687526
ENSG00000124788.16	-0.00491449	0.241161
ENSG00000124789.10	-0.00175909	0.512562
ENSG00000125122.13	0.0191991	0.708684
ENSG00000125166.11	0.000939481	0.512122
ENSG00000125285.5	-0.0911887	0.728982
ENSG00000125304.8	0.000124131	0.850026
ENSG00000125337.15	-0.0211878	0.86862
ENSG00000125352.5	0.0133983	0.493584
ENSG00000125354.21	-0.00907026	0.0427484
ENSG00000125356.6	0.000282793	0.909667
ENSG00000125375.13	0.0103466	0.307322
ENSG00000125388.18	0.17102	0.00664459
ENSG00000125445.9	0.00039813	0.903049
ENSG00000125447.15	-0.00810184	0.290879
ENSG00000125457.12	-0.00594867	0.473506
ENSG00000125458.5	0.00119007	0.888502
ENSG00000125459.13	0.0105679	0.410208
ENSG00000125484.10	0.00527933	0.0813327
ENSG00000125485.16	0.0223903	0.145921
ENSG00000125505.15	0.000849012	0.407719
ENSG00000125508.3	-0.00795562	0.711636
ENSG00000125510.14	0.00339367	0.880931
ENSG00000125531.6	-0.0275667	0.768349
ENSG00000125633.9	0.00249121	0.751019
ENSG00000125651.12	-2.07034e-05	0.995164
ENSG00000125656.7	0.00694239	0.0729698
ENSG00000125733.16	0.0071714	0.172605
ENSG00000125734.12	0.00224393	0.638559
ENSG00000125743.9	0.00105452	0.406422
ENSG00000125755.17	0.00347823	0.185014
ENSG00000125779.20	-0.0013012	0.898557
ENSG00000125817.7	0.00355129	0.0557335
ENSG00000125827.7	-0.000424204	0.828505
ENSG00000125850.9	-0.00610162	0.693572
ENSG00000125864.10	0.0613233	0.000516117
ENSG00000125868.14	0.00018939	0.655636
ENSG00000125869.8	-0.00375446	0.620286
ENSG00000125870.9	0.000639389	0.700304
ENSG00000125871.12	0.00606965	0.225304
ENSG00000125885.12	0.00450968	0.567358
ENSG00000125895.5	-0.0057783	0.757926
ENSG00000125945.13	-0.00780445	0.206362
ENSG00000125965.7	-0.0106108	0.718081
ENSG00000125967.15	-0.00275323	0.431377
ENSG00000125970.10	-0.000156472	0.910875
ENSG00000125995.14	0.000131504	0.95695
ENSG00000125999.9	-0.000229005	0.71644
ENSG00000126001.14	-0.00297724	0.45188
ENSG00000126003.6	-0.00728632	0.385533
ENSG00000126070.17	0.00387096	0.653815
ENSG00000126088.11	0.00295103	0.516386
ENSG00000126106.12	-0.0340138	0.224134
ENSG00000126107.13	0.00540742	0.272883
ENSG00000126214.19	0.00870345	0.307935
ENSG00000126215.12	0.0133209	0.434511
ENSG00000126226.20	-0.0076815	0.288199
ENSG00000126261.11	0.00291836	0.0430842
ENSG00000126264.8	-0.0156882	0.559255
ENSG00000126432.12	0.0015498	0.126353
ENSG00000126453.8	0.0108194	0.240808
ENSG00000126456.14	0.00142823	0.724679
ENSG00000126524.8	0.00700749	0.0241458
ENSG00000126749.13	0.00274762	0.794313
ENSG00000126756.10	0.000950116	0.852777
ENSG00000126768.11	0.00156898	0.719054
ENSG00000126773.11	0.0011683	0.832899
ENSG00000126790.10	0.0464686	0.168302
ENSG00000126803.9	-0.000296973	0.828692
ENSG00000126814.6	0.0110943	0.396177
ENSG00000126858.15	-0.00466357	0.402717
ENSG00000126890.13	-0.510783	0.397501
ENSG00000126945.8	-0.0062764	0.0105582
ENSG00000127054.17	0.00194127	0.515044
ENSG00000127125.8	-0.00859192	0.093331
ENSG00000127220.5	0.00152191	0.912655
ENSG00000127249.13	-0.00712854	0.362465
ENSG00000127328.20	-0.0102648	0.0864853
ENSG00000127415.11	-0.00148565	0.879245
ENSG00000127419.15	-0.00314117	0.751343
ENSG00000127423.9	0.0191506	0.407127
ENSG00000127445.12	0.00756881	0.123119
ENSG00000127452.7	0.0116554	0.477732
ENSG00000127463.12	0.00492612	0.121888
ENSG00000127481.13	0.00156012	0.265404
ENSG00000127526.12	0.00343595	0.0481835
ENSG00000127528.5	-0.00461905	0.292809
ENSG00000127554.12	-0.00186476	0.812504
ENSG00000127561.13	-0.0462688	0.14766
ENSG00000127586.15	0.00169991	0.771005
ENSG00000127720.6	-0.0913377	0.0557602
ENSG00000127774.6	0.0985497	0.157188
ENSG00000127837.8	-0.00120337	0.636467
ENSG00000127838.12	-0.00350907	0.268054
ENSG00000127870.15	-0.00139984	0.788327
ENSG00000127903.13	-0.0226796	0.706564
ENSG00000127952.15	-2.23327e-05	0.996765
ENSG00000127980.14	-0.00621669	0.432523
ENSG00000127990.14	-0.0017029	0.635905
ENSG00000127993.13	0.00297806	0.898826
ENSG00000128050.7	0.00216489	0.00333242
ENSG00000128059.7	0.0108889	0.00752427
ENSG00000128185.8	0.00565637	0.169405
ENSG00000128309.15	0.00448306	0.154528
ENSG00000128311.12	0.000726177	0.865175
ENSG00000128342.4	0.00129965	0.812898
ENSG00000128408.8	0.000426162	0.989369
ENSG00000128487.15	0.0024861	0.581317
ENSG00000128512.18	0.00684483	0.242081
ENSG00000128513.13	-0.00867917	0.352648
ENSG00000128524.4	0.0034404	0.0740777
ENSG00000128536.14	0.00577512	0.211032
ENSG00000128585.16	0.004325	0.351235
ENSG00000128590.4	0.000334621	0.943634
ENSG00000128626.10	0.00600656	0.0309715
ENSG00000128641.16	0.000416585	0.79169
ENSG00000128645.12	0.0517623	0.819725
ENSG00000128652.10	-0.00838109	0.961485
ENSG00000128694.10	0.0187024	0.495322
ENSG00000128699.12	0.000849086	0.917145
ENSG00000128789.19	-0.00344533	0.540405
ENSG00000128791.10	-0.00548032	0.173884
ENSG00000128872.8	0.0156106	0.0136626
ENSG00000128886.10	0.0317031	0.606106
ENSG00000128915.10	-0.00616368	0.337572
ENSG00000128923.9	0.00764566	0.165795
ENSG00000128951.12	0.00628959	0.182317
ENSG00000129003.14	-0.00256065	0.300156
ENSG00000129055.11	-0.00180829	0.715173
ENSG00000129071.8	-0.00158167	0.821897
ENSG00000129084.16	0.0016947	0.675006
ENSG00000129128.11	0.00103886	0.590838
ENSG00000129197.13	-0.00203233	0.87304
ENSG00000129214.13	-0.650573	0.317607
ENSG00000129219.12	0.00307517	0.654785
ENSG00000129235.9	0.00645588	0.150111
ENSG00000129245.10	0.000535639	0.935252
ENSG00000129250.10	0.00252339	0.100227
ENSG00000129255.13	-0.00535133	0.196754
ENSG00000129317.13	0.0101753	0.0744556
ENSG00000129351.16	0.001426	0.126967
ENSG00000129422.12	-0.00128749	0.506473
ENSG00000129472.11	-0.00384251	0.772104
ENSG00000129473.8	-0.0043497	0.496567
ENSG00000129474.14	-0.00301435	0.681052
ENSG00000129484.12	-0.0144512	0.236094
ENSG00000129493.13	-0.00511492	0.4995
ENSG00000129514.5	-0.00059539	0.283784
ENSG00000129535.11	-0.0695845	0.553473
ENSG00000129559.11	-0.00278705	0.496865
ENSG00000129595.11	0.00055009	0.955245
ENSG00000129654.7	-0.0183572	0.118887
ENSG00000129673.8	0.0259248	0.928558
ENSG00000129933.19	-0.00417378	0.443236
ENSG00000130023.14	-0.0213119	0.124656
ENSG00000130024.13	-0.0040471	0.305842
ENSG00000130035.5	-0.160066	0.188169
ENSG00000130066.15	5.55973e-05	0.893406
ENSG00000130150.10	-0.00237019	0.856376
ENSG00000130165.9	0.00564409	0.17331
ENSG00000130175.8	0.00149007	0.0110643
ENSG00000130193.7	0.00474895	0.00645216
ENSG00000130204.11	0.00343066	0.105815
ENSG00000130234.9	-0.00829814	0.521185
ENSG00000130299.15	0.00893726	0.269353
ENSG00000130303.11	-0.00108444	0.0986832
ENSG00000130311.9	0.00825673	0.0835622
ENSG00000130313.5	0.0048746	0.0613255
ENSG00000130332.13	0.00646401	0.0708071
ENSG00000130347.11	0.0104963	0.114122
ENSG00000130348.10	0.00320194	0.208048
ENSG00000130396.19	-0.000261662	0.792058
ENSG00000130522.5	-0.000766743	0.435434
ENSG00000130559.17	0.0141222	8.66259e-05
ENSG00000130653.14	0.0021004	0.806025
ENSG00000130675.13	0.0245386	0.43669
ENSG00000130701.3	0.0194497	0.239317
ENSG00000130725.6	0.00525241	0.0435292
ENSG00000130726.10	0.00047063	0.464959
ENSG00000130731.14	0.00156344	0.555125
ENSG00000130733.9	0.00866568	0.000312295
ENSG00000130749.8	0.00654148	0.443067
ENSG00000130755.11	-0.0024524	0.787127
ENSG00000130818.9	0.00807499	0.310488
ENSG00000130821.14	0.00366123	0.0102964
ENSG00000130822.14	0.0221526	0.204748
ENSG00000130856.14	0.00891724	0.450468
ENSG00000131023.11	-0.00225792	0.65411
ENSG00000131037.13	-0.00312489	0.416567
ENSG00000131042.12	-0.00436928	0.783068
ENSG00000131044.15	-0.293486	0.00269366
ENSG00000131061.12	0.0124014	0.704133
ENSG00000131067.15	-0.00315331	0.71218
ENSG00000131069.18	-0.0161912	0.0177679
ENSG00000131096.9	-0.0302488	0.492721
ENSG00000131100.11	0.00173666	0.470096
ENSG00000131143.7	0.00107512	0.0827043
ENSG00000131148.7	0.016809	0.0417738
ENSG00000131165.13	0.00287402	0.119976
ENSG00000131171.11	-0.000588854	0.185472
ENSG00000131351.13	0.0186354	0.301214
ENSG00000131355.13	0.0571113	0.000321731
ENSG00000131373.13	-0.0262817	0.133078
ENSG00000131374.13	0.00219768	0.573377
ENSG00000131375.8	-0.0024203	0.678194
ENSG00000131462.6	0.00098771	0.803884
ENSG00000131467.9	0.00104868	0.644833
ENSG00000131473.15	1.23863e-05	0.989572
ENSG00000131495.7	0.00149897	0.596595
ENSG00000131503.19	-0.0116475	0.824237
ENSG00000131504.14	0.00187572	0.250076
ENSG00000131652.12	0.00370258	0.453852
ENSG00000131653.11	0.00327532	0.117351
ENSG00000131668.12	0.0164063	0.0596252
ENSG00000131732.10	-0.00954623	0.706578
ENSG00000131773.12	0.00373701	0.458993
ENSG00000131778.16	0.00325788	0.339188
ENSG00000131779.9	-0.00313105	0.523567
ENSG00000131781.11	-0.00655993	0.210203
ENSG00000131791.7	0.00981191	0.0522262
ENSG00000131797.11	-0.0348738	0.0706463
ENSG00000131845.13	-0.0105066	0.358538
ENSG00000131848.8	0.00281856	0.951445
ENSG00000131849.10	-0.0323437	0.456822
ENSG00000131876.15	-0.00239551	0.698251
ENSG00000131944.8	0.0254395	0.351178
ENSG00000131951.9	0.283658	0.148244
ENSG00000132000.10	0.0179189	0.0459267
ENSG00000132016.10	0.000598916	0.90081
ENSG00000132017.9	0.00972953	0.0581598
ENSG00000132024.16	0.00407236	0.273431
ENSG00000132128.15	0.00301724	0.158653
ENSG00000132141.12	-0.0576628	0.21558
ENSG00000132254.11	-0.00115199	0.60607
ENSG00000132256.17	-0.00567935	0.587979
ENSG00000132259.11	-0.430459	0.263098
ENSG00000132275.9	-0.0153116	0.374792
ENSG00000132286.10	-0.00908831	0.263643
ENSG00000132300.17	0.00758019	0.132005
ENSG00000132305.19	0.00411164	0.119291
ENSG00000132361.15	0.00437317	0.0183958
ENSG00000132376.18	-0.00480058	0.492119
ENSG00000132383.10	-0.00191029	0.515035
ENSG00000132394.9	0.0171037	0.135699
ENSG00000132424.13	-0.000371613	0.891781
ENSG00000132432.12	7.22085e-05	0.940337
ENSG00000132466.16	0.000785185	0.492688
ENSG00000132478.8	-0.0162502	0.0686531
ENSG00000132485.11	0.00336274	0.405228
ENSG00000132541.9	0.00749818	0.2518
ENSG00000132549.17	-0.000842473	0.713609
ENSG00000132581.8	-0.00230737	0.628109
ENSG00000132589.14	-0.00115516	0.484237
ENSG00000132591.10	0.00114839	0.673248
ENSG00000132600.15	0.0065872	0.310786
ENSG00000132603.12	0.0134355	0.0417341
ENSG00000132635.15	0.00374371	0.567443
ENSG00000132646.9	0.00154269	0.305961
ENSG00000132661.3	0.000878194	0.880376
ENSG00000132664.10	0.00954164	0.325744
ENSG00000132692.17	-0.00638249	0.632319
ENSG00000132716.17	-0.00117789	0.747295
ENSG00000132718.8	-0.0108789	0.327411
ENSG00000132740.7	-0.000866197	0.894471
ENSG00000132763.13	0.00680159	0.55758
ENSG00000132773.10	0.00888209	0.650256
ENSG00000132781.16	0.000514343	0.977676
ENSG00000132801.6	0.0180559	0.681113
ENSG00000132823.9	0.00304833	0.570817
ENSG00000132837.13	-0.0681082	0.510707
ENSG00000132846.5	0.0293603	0.0004739
ENSG00000132849.17	-0.00394491	0.0416759
ENSG00000132906.16	-0.09768	0.000163435
ENSG00000132950.17	-0.0179995	0.369208
ENSG00000132952.10	-0.00662415	0.61714
ENSG00000133027.16	0.00834194	0.193108
ENSG00000133028.9	0.00311757	0.72704
ENSG00000133112.15	-0.00017384	0.0936923
ENSG00000133114.16	-0.0111568	0.397303
ENSG00000133124.11	-0.0010642	0.754683
ENSG00000133247.12	-0.00471317	0.720253
ENSG00000133302.11	-0.017108	0.449939
ENSG00000133460.18	0.0236815	0.120964
ENSG00000133597.8	-0.00541956	0.396263
ENSG00000133639.4	-0.0020319	0.101425
ENSG00000133640.17	-0.0609682	0.285483
ENSG00000133641.16	0.00475229	0.723052
ENSG00000133678.12	-0.00258191	0.371957
ENSG00000133740.9	0.00715948	0.240084
ENSG00000133773.10	0.00301658	0.787344
ENSG00000133872.12	-0.000981199	0.213709
ENSG00000133943.19	-0.0118224	0.0723781
ENSG00000133958.12	0.0282617	0.0387206
ENSG00000133985.2	-0.00487058	0.296351
ENSG00000134001.11	0.00413389	0.0241732
ENSG00000134077.14	0.000355506	0.950606
ENSG00000134107.4	-0.000817335	0.0463222
ENSG00000134109.9	-0.0034245	0.218433
ENSG00000134121.8	-0.0121211	0.280963
ENSG00000134146.10	0.0217572	0.352737
ENSG00000134153.8	0.00140413	0.77221
ENSG00000134215.14	-0.00118174	0.104844
ENSG00000134247.9	0.000629937	0.55857
ENSG00000134255.12	-0.0168934	0.0732224
ENSG00000134262.11	0.00540937	0.572901
ENSG00000134278.13	-0.00246078	0.663044
ENSG00000134283.16	0.00493247	0.474188
ENSG00000134291.10	-0.00178172	0.415542
ENSG00000134297.6	0.0377493	0.464824
ENSG00000134321.10	-0.000235006	0.889981
ENSG00000134324.10	0.00304243	0.117537
ENSG00000134326.10	-0.00230856	0.636966
ENSG00000134352.18	-0.000580834	0.0240851
ENSG00000134444.12	0.00858244	0.0779273
ENSG00000134452.18	0.00129364	0.727398
ENSG00000134461.14	0.000130885	0.994751
ENSG00000134575.8	-0.0075646	0.0981439
ENSG00000134690.9	0.00931389	0.010823
ENSG00000134717.16	0.00487726	0.155411
ENSG00000134748.12	0.00311559	0.503114
ENSG00000134755.13	0.00132441	0.0124608
ENSG00000134758.12	-0.00323345	0.653449
ENSG00000134759.12	-0.000871259	0.114534
ENSG00000134779.13	0.00275939	0.332325
ENSG00000134824.12	-0.000541947	0.292532
ENSG00000134825.12	0.00150553	0.647509
ENSG00000134851.11	0.00463601	0.0520039
ENSG00000134852.13	0.00830572	0.0264302
ENSG00000134882.14	0.00156873	0.638559
ENSG00000134897.12	0.0171868	0.18983
ENSG00000134901.11	0.0310452	0.104314
ENSG00000134905.15	4.97999e-05	0.986826
ENSG00000134910.11	0.00221532	0.0445642
ENSG00000134987.10	-0.00363623	0.676254
ENSG00000134996.11	0.00489385	0.429316
ENSG00000135018.12	0.00333808	0.0248729
ENSG00000135045.6	0.0477613	0.00377151
ENSG00000135077.7	-0.01105	0.237942
ENSG00000135097.5	-0.00110125	0.931056
ENSG00000135119.13	0.0347725	0.0145852
ENSG00000135164.17	-0.00228837	0.681166
ENSG00000135205.13	-0.048392	0.103803
ENSG00000135211.5	-0.0238458	0.140075
ENSG00000135241.15	-0.0047199	0.542786
ENSG00000135298.12	-0.090091	0.633085
ENSG00000135336.13	0.0062444	0.370401
ENSG00000135404.10	0.000145195	0.70789
ENSG00000135424.14	0.00114491	0.843711
ENSG00000135441.6	0.00345047	0.530572
ENSG00000135446.15	-0.000686319	0.773987
ENSG00000135473.13	-0.00894547	0.269448
ENSG00000135486.16	-0.000304413	0.584709
ENSG00000135502.15	-0.123831	0.710181
ENSG00000135517.6	1.26548	0.0656694
ENSG00000135525.17	0.00152891	0.46207
ENSG00000135535.13	-0.000259266	0.544127
ENSG00000135540.10	0.00719743	0.121113
ENSG00000135541.19	0.00326179	0.535118
ENSG00000135549.13	-0.00369368	0.0876289
ENSG00000135577.4	0.0742183	0.448465
ENSG00000135587.7	-0.0244103	0.118595
ENSG00000135617.3	0.0126226	0.0821815
ENSG00000135624.14	0.00214403	0.0231641
ENSG00000135637.12	0.00995452	0.785331
ENSG00000135677.9	6.70009e-05	0.935995
ENSG00000135698.8	0.00573773	0.122698
ENSG00000135720.11	0.00084956	0.72324
ENSG00000135722.7	0.0223116	0.336726
ENSG00000135763.8	0.00292758	0.707593
ENSG00000135801.8	-0.00268809	0.679556
ENSG00000135837.14	-0.000420819	0.864854
ENSG00000135870.10	0.00920501	0.0526748
ENSG00000135903.17	0.126011	0.0532833
ENSG00000135913.9	-0.00453068	0.651005
ENSG00000135930.12	0.00806847	0.0158077
ENSG00000135951.13	-0.118488	0.0221498
ENSG00000135953.9	0.0159748	0.392387
ENSG00000135956.7	-0.000791881	0.766874
ENSG00000135972.7	0.00724529	0.172282
ENSG00000135974.8	0.000665614	0.965562
ENSG00000136002.15	0.00842644	0.133742
ENSG00000136014.10	0.169797	0.0508112
ENSG00000136021.16	0.00348361	0.282255
ENSG00000136044.10	-0.0138726	0.0127836
ENSG00000136051.12	0.00495058	0.266623
ENSG00000136108.13	0.00904441	0.0205038
ENSG00000136122.14	0.0201275	0.390701
ENSG00000136143.12	0.00389941	0.618688
ENSG00000136160.13	0.00487014	0.631614
ENSG00000136167.12	-0.00141848	0.0888064
ENSG00000136169.15	-0.00552137	0.738469
ENSG00000136261.13	0.000553667	0.733406
ENSG00000136305.10	0.0824628	0.631878
ENSG00000136319.10	-0.0211921	0.229911
ENSG00000136367.13	-0.0207411	0.467151
ENSG00000136378.13	0.0227062	0.0598484
ENSG00000136425.11	0.0171171	0.199198
ENSG00000136449.12	-0.0639611	0.292944
ENSG00000136450.11	0.00192107	0.341592
ENSG00000136451.7	-0.00491105	0.0864423
ENSG00000136490.7	-0.00213047	0.627112
ENSG00000136504.10	-0.000472535	0.841567
ENSG00000136521.11	0.00291434	0.318571
ENSG00000136522.12	0.00494077	0.155426
ENSG00000136536.13	0.000679766	0.853621
ENSG00000136630.12	0.0345435	0.012198
ENSG00000136699.18	0.000779569	0.796111
ENSG00000136710.8	-0.0035604	0.606596
ENSG00000136718.8	0.00420711	0.146006
ENSG00000136738.13	0.0134748	0.0629012
ENSG00000136758.17	0.00175312	0.175203
ENSG00000136802.10	0.00814053	0.00926099
ENSG00000136868.10	0.000257334	0.92246
ENSG00000136870.9	-0.0164446	0.230765
ENSG00000136874.9	0.011279	0.377168
ENSG00000136875.11	0.000369438	0.947072
ENSG00000136897.7	0.0261602	0.0308318
ENSG00000136925.13	-0.000286023	0.987017
ENSG00000136937.11	0.0102339	0.0198361
ENSG00000136942.13	0.000139765	0.628403
ENSG00000136944.16	0.00144062	0.397191
ENSG00000136950.12	0.00290743	0.405629
ENSG00000136986.8	0.00178239	0.175776
ENSG00000137055.13	0.0111405	0.00174172
ENSG00000137074.17	0.00108375	0.899013
ENSG00000137076.17	0.000619195	0.399052
ENSG00000137094.13	-0.00759955	0.735992
ENSG00000137101.11	-0.00783272	0.720115
ENSG00000137103.15	0.00736471	0.289696
ENSG00000137133.9	-0.002673	0.699481
ENSG00000137210.12	-0.00673521	0.194165
ENSG00000137216.17	0.00331898	0.0977553
ENSG00000137269.13	0.00290178	0.504489
ENSG00000137285.9	-0.00951669	0.357341
ENSG00000137310.10	-0.00165206	0.641998
ENSG00000137312.13	-0.00065242	0.589418
ENSG00000137364.4	-0.00291272	0.646729
ENSG00000137413.14	-0.000431814	0.968971
ENSG00000137434.10	0.109612	0.243991
ENSG00000137449.14	-0.00137729	0.636758
ENSG00000137492.6	-0.00217203	0.497346
ENSG00000137494.12	-0.0284623	0.0220212
ENSG00000137497.16	-0.000360689	0.604562
ENSG00000137500.8	0.00569388	0.197726
ENSG00000137502.8	-0.00151066	0.323398
ENSG00000137522.16	-0.00262554	0.782179
ENSG00000137571.9	-0.00736213	0.815701
ENSG00000137574.9	0.00766876	0.142374
ENSG00000137601.14	-0.00738474	0.545906
ENSG00000137642.11	-0.00266239	0.110224
ENSG00000137656.10	0.00963815	0.532239
ENSG00000137693.12	-0.000152574	0.942474
ENSG00000137720.6	-0.0100318	0.39835
ENSG00000137764.18	-0.00327726	0.854468
ENSG00000137770.12	-0.00223123	0.750632
ENSG00000137804.11	0.00544023	0.0383774
ENSG00000137807.12	0.00752861	0.0640647
ENSG00000137814.8	0.0178173	0.15812
ENSG00000137819.12	-0.00698421	0.461676
ENSG00000137821.10	-0.0261636	0.341187
ENSG00000137857.16	0.0123682	0.0148226
ENSG00000137871.18	-0.000645999	0.938132
ENSG00000137936.15	-0.0013173	0.743643
ENSG00000137960.5	0.000422991	0.992807
ENSG00000137976.7	0.0189898	0.384236
ENSG00000137996.11	0.0147253	0.0358918
ENSG00000138032.19	-0.00578599	0.426622
ENSG00000138074.13	0.00123944	0.0838915
ENSG00000138075.10	0.529739	0.152804
ENSG00000138078.14	0.003116	0.400598
ENSG00000138081.18	0.00050735	0.943006
ENSG00000138083.4	0.00785489	0.267284
ENSG00000138085.15	0.00212121	0.374277
ENSG00000138092.9	0.0230999	0.0263951
ENSG00000138172.9	0.00866053	0.321957
ENSG00000138175.8	-0.0144225	0.0156027
ENSG00000138286.13	-0.0174101	0.150348
ENSG00000138375.11	0.00684337	0.592387
ENSG00000138376.9	0.00519488	0.58942
ENSG00000138400.11	-0.054014	0.373901
ENSG00000138413.12	-0.00276741	0.109965
ENSG00000138433.14	-0.009909	0.203764
ENSG00000138434.15	0.000369311	0.28848
ENSG00000138442.8	0.011053	0.0931227
ENSG00000138459.7	0.00218174	0.811682
ENSG00000138463.8	0.00462744	0.702017
ENSG00000138496.15	-0.00416535	0.0266621
ENSG00000138614.13	-0.00826517	0.24588
ENSG00000138629.14	0.00466268	0.466977
ENSG00000138640.13	0.00736933	0.0867922
ENSG00000138650.8	-0.00151942	0.577963
ENSG00000138658.14	0.0328891	0.146596
ENSG00000138660.10	-0.0055438	0.382532
ENSG00000138668.17	-0.00112397	0.519896
ENSG00000138674.15	0.00108607	0.333863
ENSG00000138686.8	0.0297418	0.156218
ENSG00000138696.9	-0.000324649	0.324022
ENSG00000138698.13	-0.00120373	0.588177
ENSG00000138756.16	-0.00884956	0.398117
ENSG00000138757.13	-0.000289197	0.820295
ENSG00000138760.7	7.01303e-05	0.920321
ENSG00000138768.13	0.000384506	0.83591
ENSG00000138802.10	0.00172376	0.72992
ENSG00000138814.15	0.00138671	0.190272
ENSG00000138823.11	0.280732	0.0490407
ENSG00000138867.15	-0.000837112	0.695678
ENSG00000138942.14	-0.00698241	0.360646
ENSG00000139117.12	0.0136278	0.240408
ENSG00000139151.13	0.556074	0.178566
ENSG00000139163.14	-0.0023874	0.342583
ENSG00000139180.9	0.00113086	0.798175
ENSG00000139182.12	0.00270182	0.0578976
ENSG00000139187.8	-0.0369704	0.626748
ENSG00000139192.10	-0.00691013	0.257123
ENSG00000139194.6	0.0144719	0.0439341
ENSG00000139197.9	0.00200411	0.641756
ENSG00000139211.6	-0.00239147	0.217627
ENSG00000139233.5	-0.00941332	0.406513
ENSG00000139263.10	0.0053941	0.22136
ENSG00000139266.5	-0.0169369	0.171571
ENSG00000139323.12	-0.00391361	0.708012
ENSG00000139324.10	0.003674	0.306101
ENSG00000139343.9	0.00180766	0.548079
ENSG00000139344.6	-0.0515613	0.32662
ENSG00000139352.3	-0.00263725	0.637139
ENSG00000139372.13	0.0121826	0.129317
ENSG00000139405.14	0.0189065	0.0290778
ENSG00000139428.10	0.00215941	0.70593
ENSG00000139433.8	0.00273106	0.38199
ENSG00000139496.14	0.00169109	0.641202
ENSG00000139517.7	-0.0100629	0.167177
ENSG00000139537.9	-0.169265	0.0232423
ENSG00000139546.9	0.00129391	0.901269
ENSG00000139579.11	0.00152447	0.821504
ENSG00000139618.13	0.00930816	0.404319
ENSG00000139625.11	-0.0126383	0.310785
ENSG00000139631.17	-0.00260124	0.558916
ENSG00000139637.12	0.000204955	0.972967
ENSG00000139644.11	-0.000404383	0.0825391
ENSG00000139651.10	-0.00594614	0.332751
ENSG00000139687.12	-0.00151053	0.696806
ENSG00000139697.10	0.00349963	0.0576015
ENSG00000139718.9	0.00350442	0.583826
ENSG00000139725.6	0.0875475	0.201456
ENSG00000139746.14	-0.00205378	0.718236
ENSG00000139826.5	-0.00575494	0.662822
ENSG00000139842.13	-0.00233751	0.330772
ENSG00000139865.15	-0.0107411	0.152322
ENSG00000139910.18	-0.00117121	0.584431
ENSG00000139946.8	-0.0126745	0.422555
ENSG00000139971.14	-0.00412983	0.857554
ENSG00000139974.14	0.0130207	0.561643
ENSG00000140006.10	0.000916752	0.958865
ENSG00000140025.14	-0.00837773	0.668665
ENSG00000140044.11	0.00642985	0.329744
ENSG00000140105.16	-0.00102572	0.240638
ENSG00000140153.16	0.000234256	0.985938
ENSG00000140254.11	0.0256124	0.0431733
ENSG00000140262.16	6.54955e-05	0.98442
ENSG00000140264.18	0.000366158	0.182695
ENSG00000140274.12	0.314029	0.419204
ENSG00000140279.11	0.0623336	0.130651
ENSG00000140280.12	0.00625338	0.747861
ENSG00000140284.9	-0.00326691	0.328974
ENSG00000140319.9	0.000621645	0.604157
ENSG00000140382.13	-0.00919184	0.432219
ENSG00000140395.7	-0.00294076	0.595596
ENSG00000140398.12	-0.0131029	0.181364
ENSG00000140400.13	-0.010354	0.200691
ENSG00000140403.11	0.00108236	0.439624
ENSG00000140406.3	0.00183122	0.726483
ENSG00000140463.12	-0.0265917	0.0165221
ENSG00000140464.18	0.00126163	0.611725
ENSG00000140471.15	-0.0306719	0.157824
ENSG00000140521.10	0.00126868	0.828214
ENSG00000140526.15	-4.06242e-05	0.905769
ENSG00000140527.13	-0.118544	0.0750025
ENSG00000140598.12	0.00698537	0.321237
ENSG00000140623.12	-0.0738842	0.740318
ENSG00000140632.15	-0.00251417	0.253819
ENSG00000140682.17	0.00729701	0.157503
ENSG00000140694.15	-0.00481462	0.219379
ENSG00000140718.17	0.00153971	0.174152
ENSG00000140740.9	-0.000676772	0.702504
ENSG00000140743.6	-0.000928966	0.863565
ENSG00000140750.15	0.00546779	0.373913
ENSG00000140795.11	0.0445238	0.63873
ENSG00000140829.10	0.00702662	0.198048
ENSG00000140830.7	0.0122232	0.450507
ENSG00000140832.8	-0.00371753	0.60462
ENSG00000140836.13	-0.00116094	0.795021
ENSG00000140839.10	-0.0204283	0.945212
ENSG00000140848.15	0.0156622	0.00286301
ENSG00000140943.15	0.000458884	0.723492
ENSG00000140948.10	0.0104651	0.0634088
ENSG00000140987.18	-0.0597295	0.532882
ENSG00000140988.14	9.10692e-05	0.525492
ENSG00000140993.9	0.0434374	0.389834
ENSG00000141012.11	0.00852948	0.147345
ENSG00000141013.13	0.00257962	0.785171
ENSG00000141027.19	-0.00169845	0.338018
ENSG00000141034.8	0.00624832	0.665473
ENSG00000141084.9	0.00375587	0.710931
ENSG00000141258.11	-0.0044351	0.213288
ENSG00000141294.8	-0.0419676	0.0582293
ENSG00000141367.10	-1.72881e-05	0.894792
ENSG00000141378.14	-5.55166e-05	0.986706
ENSG00000141424.11	-9.97381e-05	0.165273
ENSG00000141431.8	0.0237949	0.0131074
ENSG00000141448.7	0.0129918	0.0987124
ENSG00000141449.13	-0.00964075	0.093393
ENSG00000141456.13	0.00108561	0.727922
ENSG00000141497.12	-0.00353753	0.916454
[truncated: 4,196 more rows]

## Sheet: BG.DFI.COAD
Gene	Coefficient	Logrank p-value
ENSG00000000419.11	0.00375683	0.54268
ENSG00000001561.6	-0.00786634	0.602325
ENSG00000001629.8	-0.0133905	0.285522
ENSG00000001631.13	0.00754415	0.639343
ENSG00000002016.15	0.0590616	0.17734
ENSG00000002933.6	0.000293296	0.775324
ENSG00000003056.6	-0.00137629	0.886688
ENSG00000003147.16	-0.00854017	0.29995
ENSG00000003249.12	0.000350713	0.977685
ENSG00000003509.14	0.0187332	0.69286
ENSG00000004139.12	-0.0410845	0.580935
ENSG00000004142.10	-0.000489628	0.904933
ENSG00000004455.15	-0.00498935	0.334584
ENSG00000004478.7	0.000224703	0.897807
ENSG00000004700.14	0.01203	0.565974
ENSG00000004776.10	0.0055999	0.3794
ENSG00000004799.7	-0.00151663	0.833056
ENSG00000004961.13	-0.0113727	0.457867
ENSG00000005001.8	-0.00223397	0.811448
ENSG00000005022.5	-0.000170399	0.703894
ENSG00000005073.5	0.0389811	0.0591172
ENSG00000005100.11	0.00501946	0.801163
ENSG00000005156.10	0.0203159	0.205593
ENSG00000005175.8	0.0042029	0.835184
ENSG00000005194.13	-0.00283125	0.761574
ENSG00000005206.15	0.00605257	0.0397868
ENSG00000005448.15	0.0251347	0.278172
ENSG00000005469.10	0.0247721	0.414087
ENSG00000005483.18	-0.00511479	0.411857
ENSG00000005513.9	0.00267965	0.939613
ENSG00000005812.9	-0.00493039	0.625841
ENSG00000005884.16	0.00093402	0.697589
ENSG00000005889.14	-0.0122077	0.465804
ENSG00000006016.9	0.180114	0.257375
ENSG00000006118.13	0.0015772	0.83027
ENSG00000006125.15	-0.00293563	0.146123
ENSG00000006432.14	0.0252591	0.417415
ENSG00000006459.9	0.00333252	0.432952
ENSG00000006530.14	0.0249991	0.180561
ENSG00000006576.15	-0.0492819	0.0789458
ENSG00000006634.6	-0.0219868	0.267294
ENSG00000006638.10	-0.05717	0.724218
ENSG00000006695.9	-0.0257782	0.333903
ENSG00000006712.13	0.00735559	0.398239
ENSG00000006740.15	-0.00537317	0.760788
ENSG00000006747.13	0.0120871	0.295723
ENSG00000006837.10	-0.498924	0.473308
ENSG00000007001.11	-0.828655	0.638817
ENSG00000007255.9	-0.00564843	0.606318
ENSG00000007350.15	0.0234214	0.00904944
ENSG00000007376.6	-0.0102239	0.255466
ENSG00000007384.14	0.00539354	0.378551
ENSG00000007520.3	-0.0058887	0.560227
ENSG00000007545.14	0.0463672	0.186286
ENSG00000008018.8	-0.000978585	0.67689
ENSG00000008128.21	0.113194	0.0106224
ENSG00000008300.13	0.0287816	0.00103308
ENSG00000008382.14	0.00402313	0.7668
ENSG00000008405.10	-0.064034	0.0549674
ENSG00000008735.13	-0.00242308	0.965165
ENSG00000008869.10	0.0136236	0.470203
ENSG00000008952.15	0.00246249	0.669065
ENSG00000008988.8	-0.000141384	0.783877
ENSG00000009413.14	-0.00892093	0.566092
ENSG00000009830.10	0.020071	0.588005
ENSG00000010030.12	-0.020412	0.311353
ENSG00000010072.14	-0.0707639	0.24076
ENSG00000010244.15	-0.00769279	0.219657
ENSG00000010292.11	0.00154943	0.702038
ENSG00000010318.18	-0.128242	0.310183
ENSG00000010361.12	0.000853658	0.983434
ENSG00000010671.14	-0.163744	0.0937444
ENSG00000010803.15	0.000810683	0.962677
ENSG00000011021.20	0.00923651	0.829704
ENSG00000011028.12	-4.13486e-05	0.987773
ENSG00000011114.13	-0.0250546	0.158168
ENSG00000011132.10	-0.00761597	0.666723
ENSG00000011258.14	-0.00833458	0.64147
ENSG00000011260.12	-0.0100499	0.387166
ENSG00000011295.14	-0.00832238	0.393452
ENSG00000011405.12	0.00222359	0.710367
ENSG00000011426.9	-0.00398648	0.601093
ENSG00000011478.10	-0.0250367	0.328313
ENSG00000011566.13	-0.0128791	0.386881
ENSG00000012048.18	-0.00632359	0.724901
ENSG00000012171.16	0.00354818	0.349465
ENSG00000012660.12	-0.00278044	0.646527
ENSG00000012963.12	-0.0155735	0.406154
ENSG00000013016.13	-0.0183551	0.64184
ENSG00000013364.17	0.00131653	0.124881
ENSG00000013375.14	0.00368227	0.723216
ENSG00000013392.7	-0.0210334	0.71287
ENSG00000013523.8	0.00408563	0.778938
ENSG00000013563.12	0.0256218	0.133702
ENSG00000013573.15	0.0104508	0.377045
ENSG00000013583.7	-0.00742015	0.617224
ENSG00000013810.17	-0.00010322	0.987884
ENSG00000014123.9	0.00835267	0.493468
ENSG00000014164.6	-0.000550131	0.963518
ENSG00000015133.17	-0.00685363	0.564852
ENSG00000015153.13	-0.0396065	0.258141
ENSG00000015479.16	-0.0229847	0.542649
ENSG00000016082.13	0.0181142	0.885821
ENSG00000016391.9	0.00405318	0.520727
ENSG00000018189.11	-0.0395824	0.240481
ENSG00000018510.11	-0.00877816	0.290514
ENSG00000018869.15	-0.616158	0.1955
ENSG00000020129.14	0.00984897	0.615181
ENSG00000020922.11	0.0196812	0.172614
ENSG00000021826.13	-0.00581964	0.446316
ENSG00000022840.14	0.00376467	0.442775
ENSG00000023041.10	-0.0212622	0.152414
ENSG00000023228.12	-0.00861121	0.154504
ENSG00000023318.7	-0.00630663	0.385221
ENSG00000023734.9	-0.00354145	0.387568
ENSG00000024526.15	-0.0212931	0.342303
ENSG00000024862.15	0.0119904	0.647188
ENSG00000025423.10	0.0101388	0.887529
ENSG00000025434.17	-0.00679658	0.663427
ENSG00000025770.17	-0.00258299	0.773565
ENSG00000025796.12	0.00525024	0.430676
ENSG00000026103.18	-0.0602595	0.0288639
ENSG00000026508.15	-0.0011601	0.410758
ENSG00000027001.8	-0.000516886	0.960866
ENSG00000028203.16	-0.014268	0.287503
ENSG00000028310.16	0.0284779	0.00626726
ENSG00000028528.13	0.00623223	0.611358
ENSG00000029364.10	-0.0152792	0.0518713
ENSG00000030419.15	-0.146429	0.120791
ENSG00000031691.6	-0.0281857	0.535985
ENSG00000031823.13	0.015112	0.0467496
ENSG00000032219.17	0.00457408	0.865916
ENSG00000032742.16	0.0116739	0.613798
ENSG00000033011.10	0.00270957	0.867704
ENSG00000033030.12	-0.019425	0.560067
ENSG00000033178.11	-0.0123901	0.227636
ENSG00000034533.10	0.0245323	0.721222
ENSG00000034693.13	-0.0204756	0.570888
ENSG00000036672.14	0.00325886	0.940618
ENSG00000037241.6	-0.000262984	0.99087
ENSG00000037474.13	0.0135418	0.0164847
ENSG00000037637.9	-0.0610666	0.0951675
ENSG00000037749.10	-0.0438767	0.223957
ENSG00000037897.15	-0.00557761	0.792989
ENSG00000038219.11	0.00313934	0.749715
ENSG00000039123.14	0.0012211	0.898123
ENSG00000039600.9	0.181374	0.00056339
ENSG00000039650.8	0.003503	0.761202
ENSG00000040487.11	-0.0242646	0.459165
ENSG00000040531.13	-0.0242797	0.620309
ENSG00000041880.13	0.00013259	0.99342
ENSG00000042088.12	-0.0343325	0.252257
ENSG00000042429.9	0.0170037	0.464147
ENSG00000042445.12	0.00147376	0.742492
ENSG00000042493.14	0.00215404	0.196467
ENSG00000044574.7	0.000911685	0.0905543
ENSG00000046604.11	-0.00208449	0.133988
ENSG00000046651.13	0.023435	0.00600218
ENSG00000047056.13	-0.0175972	0.673649
ENSG00000047365.10	-0.0346499	0.150005
ENSG00000047410.12	0.00227626	0.634572
ENSG00000047578.11	0.0522422	0.00896148
ENSG00000047621.10	-0.0208194	0.530919
ENSG00000048162.18	-0.00137675	0.916274
ENSG00000048392.10	-0.0128203	0.357752
ENSG00000048471.12	-0.00821731	0.770285
ENSG00000048649.12	0.00271149	0.788091
ENSG00000048991.15	-0.0346549	0.0402642
ENSG00000049130.12	-0.0259	0.0810355
ENSG00000049167.12	-0.103343	0.149739
ENSG00000049618.20	0.0172357	0.0740379
ENSG00000049883.13	0.0361291	0.470155
ENSG00000050130.16	-0.0384569	0.0561288
ENSG00000050327.13	0.0311741	0.0948477
ENSG00000051009.9	0.0241646	3.19516e-05
ENSG00000051128.17	0.0293352	0.16277
ENSG00000051180.15	-0.0197176	0.414702
ENSG00000051620.9	-0.00693519	0.318596
ENSG00000052749.12	0.0070596	0.389634
ENSG00000052841.13	0.0110103	0.00464573
ENSG00000053371.11	-0.0160883	0.101914
ENSG00000053372.4	-0.0117742	0.161066
ENSG00000053770.10	-0.0179476	0.141907
ENSG00000054116.10	-0.0206582	0.172193
ENSG00000054267.19	0.00104009	0.940612
ENSG00000054282.14	-0.0164785	0.684005
ENSG00000054611.12	-0.00264458	0.866133
ENSG00000054690.12	0.00143523	0.890184
ENSG00000055070.15	-0.00761126	0.136899
ENSG00000055130.14	-0.00432234	0.655278
ENSG00000055147.16	-0.0376493	0.369054
ENSG00000055163.17	0.0132327	0.121369
ENSG00000055609.16	-0.0015982	0.710313
ENSG00000055950.15	-0.0107386	0.185912
ENSG00000056736.8	-0.00848309	0.525822
ENSG00000057019.14	0.00662925	0.332588
ENSG00000057757.8	-0.0138034	0.367035
ENSG00000057935.12	0.023458	0.371292
ENSG00000058063.14	-0.0101163	0.192087
ENSG00000058272.14	-0.0055427	0.55007
ENSG00000059377.14	0.00525087	0.37525
ENSG00000059769.18	0.046532	0.47886
ENSG00000060069.15	-0.010279	0.463238
ENSG00000060491.15	0.00579301	0.154319
ENSG00000060688.11	-0.0187254	0.169249
ENSG00000060762.17	-0.0252268	0.106477
ENSG00000060982.13	-0.0315443	0.248662
ENSG00000061794.11	-0.00487988	0.208838
ENSG00000061938.15	0.00872851	0.176445
ENSG00000062485.17	-0.00327251	0.306103
ENSG00000062650.16	-0.00120751	0.908363
ENSG00000062716.9	-0.00223102	0.335235
ENSG00000062725.8	-0.0197145	0.293439
ENSG00000063169.9	0.0224412	0.199065
ENSG00000063176.14	0.018863	0.0729542
ENSG00000063177.11	-0.000199329	0.445159
ENSG00000063245.13	0.00102819	0.491396
ENSG00000063322.12	0.00353279	0.793886
ENSG00000063854.11	-0.000631713	0.942267
ENSG00000064102.13	-0.0148916	0.330057
ENSG00000064225.11	-0.276605	0.115236
ENSG00000064393.14	-0.0133995	0.0782126
ENSG00000064419.12	0.0037425	0.677679
ENSG00000064489.20	0.550587	0.198864
ENSG00000064490.12	0.00369189	0.72438
ENSG00000064607.15	0.0104458	0.326262
ENSG00000064651.12	-0.000211588	0.751489
ENSG00000064692.17	-0.0441384	0.291726
ENSG00000064703.10	-0.035515	0.337917
ENSG00000064726.8	-0.00962581	0.300289
ENSG00000064763.9	-0.0163511	0.0931013
ENSG00000064933.15	0.0108436	0.715195
ENSG00000065000.14	0.00231378	0.405385
ENSG00000065057.6	-0.00104996	0.874172
ENSG00000065183.14	-0.00313311	0.763159
ENSG00000065243.17	-0.00441535	0.627777
ENSG00000065308.4	-0.00606954	0.529926
ENSG00000065325.11	0.278827	0.103814
ENSG00000065413.15	-0.104751	0.104661
ENSG00000065427.13	0.00144921	0.664119
ENSG00000065491.8	0.0194854	0.504146
ENSG00000065526.9	-0.00330601	0.611934
ENSG00000065559.13	-0.0398191	0.110177
ENSG00000065621.13	-0.0110633	0.416495
ENSG00000065675.13	-0.0341605	0.559429
ENSG00000065883.13	-0.00379556	0.761608
ENSG00000065911.10	-0.00628158	0.183722
ENSG00000066044.12	-0.0103474	0.254482
ENSG00000066136.18	0.00207775	0.893722
ENSG00000066185.11	-0.0985628	0.661102
ENSG00000066230.9	0.00136316	0.796767
ENSG00000066248.13	0.0143505	0.385587
ENSG00000066557.5	-0.00692297	0.830294
ENSG00000066735.13	-0.0057987	0.699882
ENSG00000066739.10	0.00496602	0.75693
ENSG00000066777.7	-0.000668273	0.88197
ENSG00000066923.16	0.0817374	0.214382
ENSG00000067057.15	-0.00051657	0.836255
ENSG00000067064.9	-0.000296684	0.947734
ENSG00000067167.6	-0.0024574	0.21657
ENSG00000067221.12	-0.0460265	0.186184
ENSG00000067248.8	0.000664478	0.974526
ENSG00000067369.12	0.0186358	0.030362
ENSG00000067560.9	-0.00243106	0.0739739
ENSG00000067601.7	-0.285519	0.552522
ENSG00000067606.14	0.0149428	0.312265
ENSG00000067646.10	0.00356408	0.894292
ENSG00000068024.15	0.00644068	0.766665
ENSG00000068028.16	-0.00451309	0.777278
ENSG00000068097.13	-0.0351213	0.474367
ENSG00000068489.11	0.00708074	0.689685
ENSG00000068650.17	0.00500923	0.0605617
ENSG00000068654.14	0.0103718	0.140679
ENSG00000068697.6	-0.000793161	0.741815
ENSG00000068878.13	-0.00221402	0.800753
ENSG00000068885.13	0.0152107	0.711954
ENSG00000068903.18	-0.00337725	0.814859
ENSG00000068912.12	-0.00347996	0.655541
ENSG00000068971.12	0.0146365	0.515657
ENSG00000069011.14	-0.00933751	0.164698
ENSG00000069248.11	0.000543117	0.965936
ENSG00000069329.14	0.00188104	0.574513
ENSG00000069345.10	0.00210769	0.780455
ENSG00000069812.10	-0.0388243	0.0583745
ENSG00000069943.8	-0.0590615	0.404925
ENSG00000069974.14	-0.0473789	0.0349086
ENSG00000070010.17	-0.016046	0.179801
ENSG00000070061.13	-0.0036327	0.836535
ENSG00000070081.14	0.00461621	0.40656
ENSG00000070087.12	0.00369639	0.444822
ENSG00000070193.4	-0.144888	0.577655
ENSG00000070366.12	-0.00820601	0.739891
ENSG00000070367.14	-0.00948428	0.384817
ENSG00000070413.17	0.00202364	0.626986
ENSG00000070423.16	-0.00853258	0.184291
ENSG00000070495.13	0.0158728	0.39154
ENSG00000070610.13	0.00614813	0.333659
ENSG00000070614.13	0.00279749	0.581187
ENSG00000070718.10	0.00220052	0.934212
ENSG00000070761.6	0.00259915	0.875537
ENSG00000070770.7	0.00416367	0.66986
ENSG00000070961.13	-0.00788588	0.38131
ENSG00000071082.9	-0.000233827	0.623917
ENSG00000071189.20	-0.018047	0.132395
ENSG00000071246.9	-0.00347659	0.830806
ENSG00000071462.10	0.00275836	0.497508
ENSG00000071539.12	0.00444244	0.777027
ENSG00000071553.15	0.00172763	0.442821
ENSG00000071794.14	0.0183254	0.0208262
ENSG00000071894.13	0.00123631	0.509365
ENSG00000072110.12	0.00188286	0.162489
ENSG00000072364.11	-0.00277249	0.626977
ENSG00000072501.16	0.00296833	0.238138
ENSG00000072571.18	-0.00338392	0.726028
ENSG00000072682.17	0.00311476	0.629909
ENSG00000072756.15	-0.0117265	0.657206
ENSG00000072849.9	-0.00930266	0.645062
ENSG00000072864.11	0.0247689	0.0849418
ENSG00000072954.5	-0.0162947	0.665722
ENSG00000073111.12	-0.00172275	0.670863
ENSG00000073169.12	7.32603e-05	0.99507
ENSG00000073331.16	-0.0631556	0.0636905
ENSG00000073578.15	0.000573395	0.812456
ENSG00000073584.17	-0.00617772	0.448177
ENSG00000073598.5	-1.20895	0.668929
ENSG00000073614.10	0.00105502	0.89933
ENSG00000073756.10	-0.024174	0.188273
ENSG00000073803.12	-0.0277381	0.149606
ENSG00000073910.18	-0.00405551	0.829625
ENSG00000074054.16	0.0139218	0.274917
ENSG00000074071.12	-0.00261284	0.370952
ENSG00000074219.12	0.00942274	0.292409
ENSG00000074317.9	0.493384	0.807534
ENSG00000074582.11	0.00831597	0.628591
ENSG00000074621.12	0.0569955	0.180472
ENSG00000074695.5	-0.000609143	0.836063
ENSG00000074755.13	-0.00128323	0.859674
ENSG00000074800.12	-0.000250169	0.422556
ENSG00000074803.16	-2.11798	0.53632
ENSG00000074855.9	0.00546022	0.814703
ENSG00000074935.12	-0.0112584	0.775057
ENSG00000075089.8	-0.0136076	0.598872
ENSG00000075131.8	-0.0306795	0.565599
ENSG00000075188.7	-0.0169512	0.257791
ENSG00000075218.17	-0.00687863	0.762587
ENSG00000075239.12	0.0136336	0.0900324
ENSG00000075303.11	-0.0497535	0.0264542
ENSG00000075336.10	-0.043507	0.175048
ENSG00000075391.15	-0.00021844	0.986063
ENSG00000075399.11	-0.00328374	0.927698
ENSG00000075643.5	-0.0336505	0.116754
ENSG00000075702.15	-0.0238465	0.349414
ENSG00000075790.9	-0.012976	0.32201
ENSG00000075914.11	0.00254544	0.801488
ENSG00000076053.9	-0.0292311	0.117796
ENSG00000076201.13	0.00537301	0.417234
ENSG00000076242.13	0.0104388	0.509452
ENSG00000076382.15	0.0078691	0.512257
ENSG00000076513.15	-0.0393473	0.0334386
ENSG00000076604.13	0.0016787	0.618712
ENSG00000076924.10	0.00299075	0.483715
ENSG00000076944.13	0.00355446	0.497351
ENSG00000076984.16	0.0105888	0.48071
ENSG00000077235.16	0.0154711	0.0131903
ENSG00000077238.12	0.00265231	0.699099
ENSG00000077312.7	-0.00394229	0.585265
ENSG00000077348.7	-0.00285143	0.736048
ENSG00000077458.11	0.0280865	0.331001
ENSG00000077463.13	0.00349621	0.709987
ENSG00000077514.7	0.0021759	0.908938
ENSG00000077935.15	0.173515	0.000405586
ENSG00000078114.17	-0.00181617	0.676826
ENSG00000078177.12	-0.0276594	0.392751
ENSG00000078246.14	-0.00737838	0.792922
ENSG00000078369.16	0.000516796	0.785783
ENSG00000078487.16	0.241073	0.00236312
ENSG00000078808.15	-0.000869689	0.715259
ENSG00000078900.13	-0.0102088	0.774562
ENSG00000078902.14	0.00879071	0.0758704
ENSG00000078967.11	-0.059769	0.206917
ENSG00000079134.10	-0.0234674	0.46912
ENSG00000079739.14	-0.00172717	0.763317
ENSG00000080007.7	-0.138426	0.317488
ENSG00000080189.13	0.00411576	0.395316
ENSG00000080298.14	0.00769252	0.747404
ENSG00000080546.12	8.959e-05	0.976353
ENSG00000080603.15	0.00222055	0.143535
ENSG00000080822.15	-0.0291708	0.0701061
ENSG00000080824.17	0.000511036	0.188518
ENSG00000080839.10	0.00902211	0.592171
ENSG00000080986.11	-0.0171086	0.51269
ENSG00000081014.9	0.00531926	0.91237
ENSG00000081019.12	-0.0215657	0.286318
ENSG00000081052.11	0.00498274	0.902931
ENSG00000081087.13	-0.0188664	0.418044
ENSG00000081870.10	0.0257457	0.438629
ENSG00000082213.16	0.00301484	0.899829
ENSG00000082258.11	0.00351233	0.799071
ENSG00000082641.14	0.00498514	0.070511
ENSG00000082701.13	-0.00229559	0.823058
ENSG00000082805.18	-0.00101852	0.922423
ENSG00000083093.8	0.0255241	0.469921
ENSG00000083290.18	-0.0163246	0.705832
ENSG00000083307.9	-0.00444529	0.687875
ENSG00000083312.16	-0.00508937	0.293807
ENSG00000083520.13	9.49619e-05	0.990716
ENSG00000083535.14	0.00878773	0.593507
ENSG00000083635.7	0.0426031	0.122093
ENSG00000083720.11	-0.0121968	0.30111
ENSG00000083799.16	-0.00948735	0.534625
ENSG00000083817.8	-0.139378	0.178311
ENSG00000083937.7	-0.00632156	0.393443
ENSG00000084072.15	0.00741614	0.509241
ENSG00000084073.7	-0.00672102	0.384638
ENSG00000084090.12	-0.00304124	0.532426
ENSG00000084110.9	-0.260948	0.572003
ENSG00000084463.6	-0.00473435	0.51694
ENSG00000084623.10	-0.000867179	0.657879
ENSG00000085231.12	0.0411201	0.201553
ENSG00000085365.16	-0.00712206	0.487032
ENSG00000085382.10	-0.0677643	0.309731
ENSG00000085491.14	-0.00866195	0.218587
ENSG00000085511.18	0.0151987	0.588024
ENSG00000085721.11	0.0290755	0.00499832
ENSG00000085733.14	0.00172906	0.491955
ENSG00000085840.11	-0.036932	0.183382
ENSG00000085872.13	0.00678934	0.430856
ENSG00000086061.14	0.00267404	0.383343
ENSG00000086062.11	-0.000491005	0.890565
ENSG00000086065.12	-0.00385837	0.519078
ENSG00000086189.8	-0.0127991	0.431657
ENSG00000086200.15	-0.0264897	0.259967
ENSG00000086598.9	-0.00163035	0.240012
ENSG00000087206.15	0.0242523	0.490327
ENSG00000087258.12	0.0158439	0.502476
ENSG00000087263.15	0.00643786	0.731352
ENSG00000087269.14	-0.000931465	0.913377
ENSG00000087299.10	-0.085629	0.0287386
ENSG00000087301.7	-0.0697499	0.0554817
ENSG00000087586.16	-0.0079049	0.373029
ENSG00000087884.13	0.00506166	0.888479
ENSG00000088448.13	0.00193984	0.400787
ENSG00000088682.12	0.00496564	0.423976
ENSG00000088727.11	-0.0645593	0.150288
ENSG00000088756.11	-0.254477	0.154776
ENSG00000088766.10	-0.000921966	0.850566
ENSG00000088808.15	0.0167343	0.316675
ENSG00000088836.11	0.0172727	0.19679
ENSG00000088930.7	-0.00104653	0.804404
ENSG00000088986.9	-0.0017334	0.636674
ENSG00000088992.16	0.0043071	0.064079
ENSG00000089006.15	-0.00332372	0.420651
ENSG00000089009.14	0.00053519	0.348633
ENSG00000089022.12	-0.0091827	0.478563
ENSG00000089048.13	0.0177329	0.185211
ENSG00000089053.11	-0.0117081	0.0462777
ENSG00000089060.10	-0.0153699	0.324518
ENSG00000089091.15	0.0898488	0.323863
ENSG00000089094.15	-0.00799284	0.746418
ENSG00000089116.3	0.245	0.628799
ENSG00000089157.14	-0.000217019	0.183889
ENSG00000089195.13	0.017295	0.247604
ENSG00000089220.4	0.000922056	0.614901
ENSG00000089225.18	0.166561	0.487932
ENSG00000089234.14	-0.00558691	0.859332
ENSG00000089248.6	0.00160692	0.600231
ENSG00000089250.17	0.0750741	0.688097
ENSG00000089335.19	-0.0163746	0.603531
ENSG00000089505.16	-0.323313	0.370621
ENSG00000089737.14	0.00648982	0.3338
ENSG00000089818.15	-0.0424026	0.0427678
ENSG00000089847.11	0.0128343	0.93364
ENSG00000089876.10	-0.0190752	0.100939
ENSG00000090013.8	-0.00215151	0.555145
ENSG00000090060.16	-0.00155149	0.641245
ENSG00000090061.16	-0.0184112	0.711134
ENSG00000090238.10	0.00071056	0.938442
ENSG00000090273.12	0.00325063	0.424277
ENSG00000090372.13	0.00214432	0.672082
ENSG00000090581.8	-0.00498734	0.652355
ENSG00000090861.14	0.00412256	0.183576
ENSG00000090889.11	0.00492542	0.685856
ENSG00000091157.12	-0.0597638	0.143285
ENSG00000091164.11	-0.0195446	0.0489206
ENSG00000091181.18	-2.53153	0.110253
ENSG00000091262.13	0.0467547	0.00356159
ENSG00000091428.16	0.0742505	0.181485
ENSG00000091640.6	0.0121224	0.341592
ENSG00000091651.7	0.00714006	0.749305
ENSG00000092020.9	-0.0434036	0.169143
ENSG00000092094.9	-0.000402811	0.981875
ENSG00000092098.15	0.0299155	0.386592
ENSG00000092201.8	-0.000293103	0.944776
ENSG00000092203.12	-0.000255354	0.984257
ENSG00000092421.15	0.00326661	0.750549
ENSG00000092531.8	-0.0172295	0.163687
ENSG00000092841.17	-0.000913091	0.173256
ENSG00000092964.15	-0.00011069	0.964498
ENSG00000092969.10	-0.0257345	0.774901
ENSG00000092978.9	-0.00485368	0.873789
ENSG00000093000.17	-0.0161303	0.132194
ENSG00000093009.8	-0.00924575	0.563492
ENSG00000093010.10	0.000649072	0.699957
ENSG00000093183.12	0.00969121	0.70183
ENSG00000094916.12	-0.00120122	0.7286
ENSG00000095139.12	0.00099324	0.801047
ENSG00000095319.13	-0.000289772	0.961132
ENSG00000095321.15	0.00227952	0.523329
ENSG00000095574.10	-0.00732355	0.791123
ENSG00000095777.13	-0.426392	0.578813
ENSG00000095787.20	-0.00629039	0.334385
ENSG00000095794.18	-0.0238084	0.577218
ENSG00000096070.18	0.0158662	0.114129
ENSG00000096696.12	0.00122559	0.193233
ENSG00000096872.14	0.00718626	0.76053
ENSG00000097021.18	-0.0028566	0.482039
ENSG00000097033.13	-0.00666194	0.306103
ENSG00000099194.5	0.00118326	0.00138266
ENSG00000099203.5	0.0201565	0.504691
ENSG00000099256.17	0.00538588	0.863078
ENSG00000099290.14	-0.00803989	0.677348
ENSG00000099326.7	-0.00268524	0.823265
ENSG00000099331.12	0.000495904	0.929989
ENSG00000099364.15	0.0254991	0.0240495
ENSG00000099381.15	0.0194804	0.0618129
ENSG00000099625.11	-0.100328	0.540758
ENSG00000099783.10	0.00195055	0.454757
ENSG00000099840.12	0.0128294	0.921759
ENSG00000099849.13	0.00373978	0.388473
ENSG00000099889.12	0.0230707	0.0579032
ENSG00000099910.15	-0.0113338	0.721898
ENSG00000099917.16	0.000950816	0.849871
ENSG00000099940.10	-0.0168661	0.504174
ENSG00000099953.8	0.000489199	0.578062
ENSG00000099968.16	-0.0298964	0.0481989
ENSG00000099977.12	0.010736	0.395575
ENSG00000099995.17	0.000532448	0.926177
ENSG00000100014.18	0.0175518	0.538238
ENSG00000100024.13	0.348974	1.62508e-05
ENSG00000100028.10	0.00555347	0.450675
ENSG00000100029.16	0.00214161	0.600887
ENSG00000100077.13	-0.00782522	0.700639
ENSG00000100084.13	0.00287751	0.890304
ENSG00000100099.19	0.0085524	0.635672
ENSG00000100100.11	0.00924674	0.404706
ENSG00000100104.11	-0.0033784	0.960197
ENSG00000100105.16	0.00634459	0.561758
ENSG00000100109.15	0.00512159	0.869225
ENSG00000100124.11	-0.0109788	0.596058
ENSG00000100129.16	-0.0028519	0.395126
ENSG00000100209.8	-0.101737	0.109503
ENSG00000100211.9	-0.0119173	0.676437
ENSG00000100216.5	-0.00702236	0.200459
ENSG00000100218.10	0.153958	0.481323
ENSG00000100227.16	0.0034264	0.718305
ENSG00000100228.11	-0.00711552	0.81596
ENSG00000100258.16	-0.00236243	0.700404
ENSG00000100263.12	0.015439	0.465218
ENSG00000100284.19	0.00341051	0.659103
ENSG00000100288.18	0.245503	0.0262088
ENSG00000100312.9	0.189462	0.917877
ENSG00000100314.3	-0.162689	0.589368
ENSG00000100319.12	-0.0229924	0.676018
ENSG00000100345.19	0.000251466	0.438637
ENSG00000100354.19	-0.0119174	0.301691
ENSG00000100380.11	0.00459033	0.123385
ENSG00000100410.6	-0.0327646	0.0460579
ENSG00000100412.14	-0.00153404	0.713844
ENSG00000100418.7	-0.0270253	0.0161763
ENSG00000100439.9	-0.023429	0.235533
ENSG00000100442.9	0.00408463	0.723009
ENSG00000100461.16	-0.00569356	0.665043
ENSG00000100462.14	-0.00272205	0.718616
ENSG00000100523.13	-0.0156628	0.521876
ENSG00000100554.10	-0.00272938	0.836267
ENSG00000100565.14	0.600021	0.153496
ENSG00000100575.12	-0.0257781	0.223943
ENSG00000100577.17	-0.0158421	0.426785
ENSG00000100578.13	-0.0507129	0.204946
ENSG00000100580.7	-0.0317917	0.184308
ENSG00000100583.4	0.236273	0.59187
ENSG00000100591.6	-5.76938e-05	0.988563
ENSG00000100601.8	-0.00932328	0.886031
ENSG00000100603.12	0.00643928	0.584177
ENSG00000100632.9	-0.00771921	0.13194
ENSG00000100644.15	-0.00843637	0.0792904
ENSG00000100697.13	-0.0110001	0.235634
ENSG00000100711.12	-0.000926202	0.941462
ENSG00000100731.14	-0.00957265	0.383207
ENSG00000100744.13	-0.00927101	0.0705994
ENSG00000100784.8	-0.0755883	0.0442385
ENSG00000100811.9	-0.0050022	0.625552
ENSG00000100813.13	0.00676703	0.181126
ENSG00000100823.10	-0.00290522	0.3846
ENSG00000100852.11	-0.00211606	0.606339
ENSG00000100865.13	-0.0129301	0.513862
ENSG00000100883.10	-0.00970081	0.423771
ENSG00000100890.14	-0.144146	0.190772
ENSG00000100897.16	0.000523146	0.946385
ENSG00000100911.12	-0.00184266	0.43051
ENSG00000100916.12	-0.0763205	0.354559
ENSG00000100938.16	-0.00897619	0.442866
ENSG00000100941.7	0.00759973	0.0357931
ENSG00000101076.15	0.00202168	0.04898
ENSG00000101079.19	0.0114934	0.181143
ENSG00000101109.10	0.00168282	0.803173
ENSG00000101126.14	0.00303799	0.423656
ENSG00000101138.10	-0.00806032	0.504925
ENSG00000101144.11	-0.00148588	0.713697
ENSG00000101150.16	0.000542976	0.835235
ENSG00000101182.13	1.4985e-05	0.984706
ENSG00000101187.14	0.00205534	0.533349
ENSG00000101191.15	0.00826097	0.030031
ENSG00000101193.7	0.00226152	0.597017
ENSG00000101198.13	0.345629	0.26784
ENSG00000101199.11	0.00208208	0.173769
ENSG00000101216.9	0.018399	0.124274
ENSG00000101224.16	-0.000952057	0.665784
ENSG00000101246.18	0.00316538	0.492363
ENSG00000101247.16	-0.0410911	0.210149
ENSG00000101290.12	-0.000489767	0.940542
ENSG00000101346.10	0.002823	0.0798218
ENSG00000101365.19	0.00160389	0.632756
ENSG00000101407.11	0.00958385	0.317767
ENSG00000101413.10	0.00761811	0.341562
ENSG00000101421.3	0.00168781	0.0914979
ENSG00000101425.11	-0.379217	0.644813
ENSG00000101452.13	0.0384092	0.0554384
ENSG00000101457.11	0.00168849	0.619574
ENSG00000101470.8	0.00293521	0.668923
ENSG00000101473.15	0.00139024	0.827533
ENSG00000101493.9	-0.0135575	0.680432
ENSG00000101546.11	-0.0374324	0.250626
ENSG00000101574.13	-0.185169	0.00572444
ENSG00000101596.13	-0.0129116	0.236357
ENSG00000101608.11	-0.00404349	0.064688
ENSG00000101639.17	-0.0405847	0.0907608
ENSG00000101654.16	-0.0360439	0.0732308
ENSG00000101745.14	-0.0228776	0.228132
ENSG00000101746.14	0.219892	0.407435
ENSG00000101751.9	-0.00563746	0.88704
ENSG00000101752.10	-0.0175613	0.143318
ENSG00000101843.17	0.0043461	0.660493
ENSG00000101844.16	-0.0178195	0.635064
ENSG00000101850.11	-0.0117806	0.631766
ENSG00000101955.13	0.0213402	0.514577
ENSG00000101986.11	0.021953	0.00511719
ENSG00000101997.11	0.0133895	0.20668
ENSG00000102081.12	-0.000235009	0.968323
ENSG00000102103.14	0.000796743	0.851364
ENSG00000102125.14	0.0116082	0.285274
ENSG00000102312.19	-0.0102176	0.783023
ENSG00000102317.16	-0.00104659	0.504423
ENSG00000102393.8	-0.00447031	0.751984
ENSG00000102471.12	-0.00571888	0.155592
ENSG00000102531.15	-0.0012359	0.808726
ENSG00000102547.17	0.00822595	0.11676
ENSG00000102572.13	0.00216261	0.617666
ENSG00000102580.13	0.00110106	0.779206
ENSG00000102753.8	-0.00238584	0.753326
ENSG00000102755.9	0.00377273	0.699039
ENSG00000102786.13	-0.000572312	0.939407
ENSG00000102796.9	0.0492925	0.100677
ENSG00000102871.14	-0.00284985	0.867642
ENSG00000102897.8	-0.00226042	0.841025
ENSG00000102900.11	0.0129372	0.218668
ENSG00000102904.13	0.630258	0.0939543
ENSG00000102921.6	0.00455184	0.791356
ENSG00000102974.13	0.00122179	0.926772
ENSG00000102977.12	-0.00100542	0.947198
ENSG00000102981.8	-0.0273814	0.377874
ENSG00000103005.10	0.00657963	0.176978
ENSG00000103035.9	0.00299334	0.676767
ENSG00000103051.17	0.00998184	0.192282
ENSG00000103061.10	0.0499743	0.552679
ENSG00000103145.9	-0.0311883	0.181266
ENSG00000103152.10	-0.00854377	0.385275
ENSG00000103160.10	0.0417124	0.0903165
ENSG00000103174.10	-0.0121538	0.560057
ENSG00000103197.15	0.0041405	0.33764
ENSG00000103227.17	-0.0113795	0.678483
ENSG00000103248.16	0.108909	0.00233141
ENSG00000103253.16	-0.031191	0.193686
ENSG00000103266.9	-0.00612314	0.479158
ENSG00000103275.17	-0.00320915	0.533305
ENSG00000103326.9	-0.000972487	0.771549
ENSG00000103343.11	0.0848346	0.321288
ENSG00000103353.14	0.0280466	0.00386314
ENSG00000103356.14	0.0144784	0.379261
ENSG00000103363.13	-0.000520937	0.683199
ENSG00000103423.12	-0.00169791	0.764945
ENSG00000103429.9	-0.000784567	0.933299
ENSG00000103494.11	0.00322874	0.945951
ENSG00000103502.12	0.00808221	0.155549
ENSG00000103549.20	0.0245173	0.000661663
ENSG00000103591.11	-0.0150179	0.184254
ENSG00000103599.18	-0.333058	0.156298
ENSG00000103671.8	0.0173389	0.583241
ENSG00000103710.9	-0.00983085	0.800896
ENSG00000103852.11	0.0353664	0.484853
ENSG00000103942.11	-0.0419897	0.630957
ENSG00000103966.8	-0.00447541	0.448246
ENSG00000103978.14	0.00658025	0.305959
ENSG00000103994.15	-0.0071706	0.41465
ENSG00000103995.12	0.0435149	0.184409
ENSG00000104043.13	-0.36676	0.0735501
ENSG00000104047.13	-0.019963	0.497995
ENSG00000104064.15	-0.0221865	0.42642
ENSG00000104129.8	0.0435964	0.284658
ENSG00000104131.11	0.00413466	0.542655
ENSG00000104140.6	0.0101962	0.278509
ENSG00000104147.7	-0.0614747	0.329349
ENSG00000104164.9	-0.00291638	0.78804
ENSG00000104228.11	-0.0118616	0.698062
ENSG00000104231.9	-0.00911657	0.355391
ENSG00000104299.13	0.0129815	0.618278
ENSG00000104312.7	-0.022963	0.228732
ENSG00000104356.9	-0.0192318	0.517067
ENSG00000104365.12	-0.00112685	0.918295
ENSG00000104369.4	0.0117073	0.375772
ENSG00000104375.14	-0.023591	0.270825
ENSG00000104381.11	0.0672084	0.00309102
ENSG00000104388.13	-0.00293531	0.410638
ENSG00000104490.16	0.0115396	0.658145
ENSG00000104549.10	-0.000186351	0.951878
ENSG00000104643.8	-0.049207	0.306523
ENSG00000104671.6	0.0133615	0.470439
ENSG00000104689.8	-0.0023592	0.903882
ENSG00000104714.12	0.0474565	0.121519
ENSG00000104722.12	0.220359	0.762871
ENSG00000104738.15	-0.00330107	0.301589
ENSG00000104756.14	-0.0141498	0.401312
ENSG00000104763.16	-0.00486106	0.237061
ENSG00000104765.13	-0.00495209	0.413512
ENSG00000104774.11	0.00105667	0.878959
ENSG00000104812.13	-0.013511	0.175392
ENSG00000104814.11	-0.0887646	0.227538
ENSG00000104825.15	-0.000260109	0.981322
ENSG00000104835.13	0.0722754	0.319326
ENSG00000104853.14	-0.00111676	0.763492
ENSG00000104872.9	-0.000470104	0.955546
ENSG00000104880.16	0.0548045	0.186767
ENSG00000104881.13	-0.00763047	0.443866
ENSG00000104885.16	-0.00114722	0.888352
ENSG00000104892.15	0.142243	0.199686
ENSG00000104897.8	0.00122778	0.817935
ENSG00000104901.5	1.85301	0.111184
ENSG00000104904.11	-0.00177251	0.097031
ENSG00000104907.11	0.00578954	0.380187
ENSG00000104915.13	-0.00971723	0.28304
ENSG00000104946.9	0.0153884	0.205763
ENSG00000104951.14	-0.00993516	0.641486
ENSG00000104960.14	0.00609076	0.198219
ENSG00000104973.13	0.00670397	0.380323
ENSG00000104979.7	-0.00361781	0.43491
ENSG00000104998.3	-0.0348616	0.15437
ENSG00000105011.7	-0.0129101	0.167849
ENSG00000105053.9	0.00426076	0.799447
ENSG00000105072.7	0.0796794	0.456192
ENSG00000105127.7	0.0140587	0.497822
ENSG00000105193.7	-0.000277734	0.30841
ENSG00000105220.13	-0.000465614	0.640842
ENSG00000105223.17	-0.00224747	0.45153
ENSG00000105248.14	-0.00761342	0.718504
ENSG00000105281.11	0.000590389	0.667511
ENSG00000105376.4	0.0339712	0.84229
ENSG00000105443.12	0.0101878	0.00765131
ENSG00000105467.7	-0.678141	0.236422
ENSG00000105479.14	0.387651	0.0809702
ENSG00000105483.15	-0.0301904	0.317274
ENSG00000105486.12	0.0086952	0.248538
ENSG00000105516.9	-0.00103962	0.977079
ENSG00000105612.7	-0.0123685	0.228208
ENSG00000105618.12	0.0112841	0.24584
ENSG00000105619.12	0.0391415	0.0957206
ENSG00000105641.3	0.097928	0.896136
ENSG00000105649.8	-0.0626688	0.514538
ENSG00000105669.11	-0.000778348	0.721711
ENSG00000105671.10	-0.000792921	0.910227
ENSG00000105676.12	-0.00171042	0.806145
ENSG00000105677.10	-0.00377663	0.325996
ENSG00000105696.7	0.242262	0.507766
ENSG00000105705.14	0.00780851	0.690627
ENSG00000105723.10	-0.00615065	0.486194
ENSG00000105738.9	0.00192382	0.751059
ENSG00000105778.16	-0.00089116	0.826632
ENSG00000105810.8	-0.00217517	0.723694
ENSG00000105821.13	0.0191653	0.0689357
ENSG00000105825.10	-0.0737212	0.292607
ENSG00000105835.10	-0.00872422	0.0317786
ENSG00000105879.10	-0.0166437	0.39216
ENSG00000105968.17	-0.0117415	0.0671288
ENSG00000105971.13	-0.0223538	0.295704
ENSG00000105982.15	0.16986	0.0102017
ENSG00000105991.7	0.22433	0.0550696
ENSG00000106028.9	-0.000837589	0.883416
ENSG00000106031.7	-0.00243242	0.798617
ENSG00000106080.9	-0.0418298	0.246561
ENSG00000106086.17	-0.00497827	0.79844
ENSG00000106105.12	-0.00294375	0.40487
ENSG00000106144.18	-0.0115129	0.318504
ENSG00000106244.11	0.00251175	0.500414
ENSG00000106245.8	0.00128927	0.894173
ENSG00000106263.16	0.000124459	0.931053
ENSG00000106266.7	-0.00699451	0.406238
ENSG00000106268.14	-0.011533	0.444011
ENSG00000106290.13	0.0130689	0.438617
ENSG00000106299.7	-0.00876273	0.259145
ENSG00000106305.8	-0.010659	0.543546
ENSG00000106344.7	0.00428042	0.78769
ENSG00000106355.8	-0.00795382	0.461546
ENSG00000106397.10	0.00168335	0.188669
ENSG00000106400.10	0.000875412	0.825321
ENSG00000106459.13	0.0525238	0.220182
ENSG00000106524.7	-0.0124286	0.64209
ENSG00000106538.8	-0.00495688	0.417094
ENSG00000106546.11	-0.00913084	0.11867
ENSG00000106554.10	0.00259647	0.761042
ENSG00000106565.16	0.00106249	0.327234
ENSG00000106588.9	0.00115735	0.951768
ENSG00000106591.3	-0.0087728	0.436778
ENSG00000106608.15	0.00760894	0.45729
ENSG00000106610.13	-0.0108677	0.866502
ENSG00000106617.12	-0.00487185	0.827844
ENSG00000106692.12	-0.0261502	0.20286
ENSG00000106733.19	-0.0412176	0.320468
ENSG00000106803.8	-0.00649359	0.380771
ENSG00000106993.10	-0.0156906	0.650982
ENSG00000107099.14	-0.0219819	0.263191
ENSG00000107175.9	-0.00527889	0.626709
ENSG00000107185.9	0.00369623	0.752359
ENSG00000107262.15	-0.00147955	0.748251
ENSG00000107282.6	0.0473317	0.305493
ENSG00000107362.12	-0.0477291	0.0949461
ENSG00000107371.11	-0.000692297	0.978483
ENSG00000107485.14	-0.202562	0.266996
ENSG00000107551.19	0.00224481	0.891484
ENSG00000107560.9	0.00663835	0.686071
ENSG00000107651.11	-0.000473684	0.971731
ENSG00000107669.16	-0.00599079	0.68723
ENSG00000107758.14	-0.0256699	0.164871
ENSG00000107779.10	-0.0139221	0.502652
ENSG00000107796.11	0.000226068	0.776416
ENSG00000107798.16	-0.0147458	0.032302
ENSG00000107807.11	-0.0365072	0.561322
ENSG00000107815.6	0.00194696	0.923013
ENSG00000107819.12	0.0063314	0.531744
ENSG00000107821.13	-0.00205398	0.942414
ENSG00000107854.5	-0.00528116	0.616887
ENSG00000107864.13	-0.105136	0.319308
ENSG00000107897.17	-0.0139261	0.21945
ENSG00000107937.17	0.0127818	0.178871
ENSG00000107938.16	0.0162456	0.687165
ENSG00000107949.15	0.0122991	0.240918
ENSG00000107984.8	0.00926098	0.819298
ENSG00000108061.10	-0.00989468	0.456922
ENSG00000108107.11	-0.000199925	0.441254
ENSG00000108306.10	0.00590922	0.683031
ENSG00000108312.13	0.00634788	0.305194
ENSG00000108342.11	0.00457298	0.88723
ENSG00000108379.8	0.111085	0.153187
ENSG00000108384.13	0.016866	0.683824
ENSG00000108395.12	-0.0434372	0.0748803
ENSG00000108423.13	-0.0887107	0.247632
ENSG00000108424.8	0.000547059	0.832669
ENSG00000108433.14	0.04226	0.299013
ENSG00000108439.8	-0.00975711	0.562307
ENSG00000108443.12	-0.00626701	0.727523
ENSG00000108469.13	0.0521417	0.013588
ENSG00000108474.15	-0.0254302	0.629479
ENSG00000108509.19	-0.00209328	0.859648
ENSG00000108515.16	0.111645	0.0270756
ENSG00000108518.7	-5.40036e-05	0.899795
ENSG00000108523.14	-0.00488454	0.475046
ENSG00000108528.12	-0.00328854	0.629876
ENSG00000108559.10	-0.00307841	0.757576
ENSG00000108590.9	-0.191909	0.0489059
ENSG00000108641.13	-0.0440665	0.230274
ENSG00000108666.8	-0.0252945	0.406841
ENSG00000108733.8	0.0123285	0.845396
ENSG00000108759.3	0.429136	0.322783
ENSG00000108773.9	0.00862611	0.108602
ENSG00000108774.13	-0.00261627	0.617927
ENSG00000108798.7	-0.0815148	0.0926453
ENSG00000108825.16	0.185728	0.771114
ENSG00000108826.14	-0.00931674	0.33206
ENSG00000108828.14	-0.00178241	0.696109
ENSG00000108830.9	-0.0064087	0.985682
ENSG00000108839.10	0.0384535	0.859154
ENSG00000108883.11	0.00115607	0.817345
ENSG00000109046.13	0.00114415	0.864684
ENSG00000109062.8	-0.00168708	0.654922
ENSG00000109065.10	0.0142927	0.238212
ENSG00000109066.12	0.0172326	0.346007
ENSG00000109072.12	0.0255876	0.88572
ENSG00000109079.8	-0.0106486	0.338599
ENSG00000109083.12	-0.0121427	0.665256
ENSG00000109111.13	0.00961784	0.0669556
ENSG00000109113.16	-0.0174331	0.426622
ENSG00000109132.6	1.02932	0.196218
ENSG00000109158.9	-0.0193619	0.774218
ENSG00000109189.11	-0.0475775	0.22912
ENSG00000109320.10	-0.0135352	0.199085
ENSG00000109332.18	-0.00795389	0.0216434
ENSG00000109339.17	-0.103907	0.571091
ENSG00000109436.7	0.00912883	0.594837
ENSG00000109466.12	-0.0318205	0.394263
ENSG00000109475.15	-0.00144037	0.175789
ENSG00000109534.15	-0.0154698	0.368084
ENSG00000109536.10	-0.00427688	0.872083
ENSG00000109572.12	-0.00683152	0.111811
ENSG00000109586.10	-0.00279149	0.497445
ENSG00000109618.10	-0.0164472	0.619449
ENSG00000109670.12	-0.0629618	0.124307
ENSG00000109684.13	-1.40246	0.103713
ENSG00000109736.13	-0.000732153	0.872837
ENSG00000109771.14	-0.0596803	0.554643
ENSG00000109775.9	-0.0891572	0.0427473
ENSG00000109787.11	-0.000896112	0.863077
ENSG00000109805.8	-0.00977221	0.587436
ENSG00000109814.10	-0.00165521	0.762353
ENSG00000109832.11	-0.688573	0.691463
ENSG00000109911.16	0.0366166	0.312226
ENSG00000110025.11	0.646682	0.0323667
ENSG00000110031.11	-0.0435951	0.23434
ENSG00000110046.11	0.00652826	0.46786
ENSG00000110048.10	-0.00269708	0.724071
ENSG00000110060.7	-0.0535032	0.303081
ENSG00000110063.7	0.00176096	0.897772
ENSG00000110074.9	0.0116092	0.35441
ENSG00000110080.17	-0.00296474	0.46198
ENSG00000110104.10	0.0197559	0.102436
ENSG00000110107.7	0.00394395	0.242027
ENSG00000110108.8	-0.00815754	0.220534
ENSG00000110172.10	0.00687885	0.40394
ENSG00000110315.5	-0.00391124	0.7671
ENSG00000110321.14	5.45018e-05	0.943535
ENSG00000110367.10	-0.00201031	0.682653
ENSG00000110375.2	-0.0418329	0.63573
ENSG00000110400.9	0.00151094	0.65616
ENSG00000110429.12	0.0198047	0.202544
ENSG00000110435.10	0.0192287	0.311946
ENSG00000110536.12	0.0119924	0.684276
ENSG00000110660.13	-0.0091907	0.447023
ENSG00000110713.14	0.00547519	0.457729
ENSG00000110717.9	-0.00261032	0.437104
ENSG00000110721.10	0.0232983	0.176281
ENSG00000110756.16	-0.00472052	0.863166
ENSG00000110768.10	0.00225036	0.889712
ENSG00000110844.12	0.161782	0.00389074
ENSG00000110871.13	-0.0283059	0.116158
ENSG00000110888.16	0.00954263	0.736877
ENSG00000110906.11	0.00106578	0.91075
ENSG00000110921.10	-0.00374257	0.812561
ENSG00000110944.7	-0.00693189	0.822399
ENSG00000110987.7	-0.0184641	0.521494
ENSG00000111011.16	0.010587	0.368672
ENSG00000111058.6	0.0113747	0.796089
ENSG00000111110.10	0.0126863	0.102853
ENSG00000111199.9	-0.0690224	0.507415
ENSG00000111203.10	0.014458	0.34538
ENSG00000111206.11	-0.00139212	0.806985
ENSG00000111215.10	0.00563963	0.969314
ENSG00000111231.7	-0.0277871	0.281805
ENSG00000111237.17	-0.0174351	0.0613994
ENSG00000111247.13	0.00658742	0.623333
ENSG00000111254.6	-0.164716	0.423931
ENSG00000111271.13	0.0140374	0.390336
ENSG00000111358.12	-0.00975739	0.491372
ENSG00000111361.11	-0.00550858	0.725313
ENSG00000111412.5	-0.0184666	0.127145
ENSG00000111432.4	0.0136877	0.00105976
ENSG00000111481.8	-0.00209113	0.549074
ENSG00000111540.14	-0.00163499	0.697355
ENSG00000111596.10	-0.0214976	0.174494
ENSG00000111639.6	-0.00262704	0.702079
ENSG00000111640.13	-0.000101456	0.421436
ENSG00000111647.11	-0.0443654	0.158235
ENSG00000111653.18	-0.00736109	0.72641
ENSG00000111665.10	-0.024137	0.202151
ENSG00000111666.9	0.0031795	0.637903
ENSG00000111667.12	-0.00179421	0.730515
ENSG00000111696.10	-0.0205791	0.187175
ENSG00000111707.10	-0.00142473	0.905152
ENSG00000111711.8	-0.0137308	0.170602
ENSG00000111725.9	-0.00169041	0.769419
ENSG00000111727.10	-0.102577	0.114556
ENSG00000111737.10	-0.00664725	0.552873
ENSG00000111785.17	0.0015216	0.967581
ENSG00000111786.7	-0.000767257	0.869932
ENSG00000111790.12	-0.010108	0.597071
ENSG00000111802.12	-0.00376749	0.379569
ENSG00000111817.15	-0.0173875	0.375795
ENSG00000111845.4	0.0110462	0.506724
ENSG00000111877.16	-0.0405501	0.396118
ENSG00000111880.14	-0.0230386	0.417653
ENSG00000111897.6	-0.000630649	0.891146
ENSG00000111913.14	-0.100545	0.201334
ENSG00000112029.8	-0.0112314	0.705765
ENSG00000112078.12	-0.0137701	0.134205
ENSG00000112110.8	0.000316141	0.96907
ENSG00000112237.11	-0.00989309	0.179384
ENSG00000112249.12	-0.00924901	0.336023
ENSG00000112276.12	-0.00922444	0.909223
ENSG00000112282.16	0.00319859	0.859894
ENSG00000112290.11	0.084207	0.0166571
ENSG00000112293.13	0.000979798	0.998133
ENSG00000112294.11	-0.00433483	0.765632
ENSG00000112304.9	-0.00221659	0.871444
ENSG00000112367.9	0.0458953	0.193332
ENSG00000112425.12	-0.0105255	0.923883
ENSG00000112473.15	0.00373074	0.093289
ENSG00000112530.10	0.0203411	0.972526
ENSG00000112531.15	-0.0102588	0.363516
ENSG00000112541.12	-0.00326796	0.914596
ENSG00000112576.11	-0.00573597	0.445983
ENSG00000112578.8	0.00733443	0.551539
ENSG00000112592.11	0.0230121	0.594312
ENSG00000112624.11	0.00158601	0.933685
ENSG00000112697.14	-0.00258661	0.536404
ENSG00000112699.9	-0.00059986	0.744262
ENSG00000112739.15	0.00863121	0.157139
ENSG00000112855.13	0.0413003	0.0240107
ENSG00000112877.7	0.0862243	0.0026817
ENSG00000112902.10	-0.00163889	0.736873
ENSG00000112977.14	-0.000374016	0.896953
ENSG00000112983.16	0.0144193	0.30807
ENSG00000112984.10	-0.00991034	0.580458
ENSG00000112992.15	0.00145031	0.857128
ENSG00000112996.8	0.00449684	0.614516
ENSG00000113048.15	-0.00937754	0.200016
ENSG00000113141.14	0.0164078	0.0118548
ENSG00000113161.14	-0.00028167	0.937363
ENSG00000113163.14	-0.00649282	0.725353
ENSG00000113248.5	0.00938775	0.792022
ENSG00000113263.11	-0.202329	0.0649722
ENSG00000113296.13	0.00943479	0.307894
ENSG00000113318.9	0.0233952	0.432174
ENSG00000113319.10	-0.011305	0.702687
ENSG00000113328.17	-0.00569112	0.142967
ENSG00000113360.15	0.0134302	0.127687
ENSG00000113368.10	0.00291432	0.541982
ENSG00000113384.12	0.0033586	0.54663
ENSG00000113407.12	0.00170227	0.600546
ENSG00000113441.14	-0.00593498	0.453883
ENSG00000113522.12	0.00950425	0.251344
ENSG00000113525.8	-1.98965	0.360175
ENSG00000113575.8	-0.00209004	0.692628
ENSG00000113593.10	0.0369381	0.272327
ENSG00000113615.11	-0.0116343	0.329813
ENSG00000113648.15	0.00339964	0.144496
ENSG00000113712.15	-0.0171971	0.0655543
ENSG00000113734.16	-0.0402912	0.425093
ENSG00000113761.10	0.107733	0.17942
ENSG00000113790.9	0.0271075	0.114757
ENSG00000113810.14	-0.000667308	0.932842
ENSG00000113845.8	-0.00187818	0.860978
ENSG00000113946.3	0.0646716	0.743333
ENSG00000113971.17	0.0597089	0.181765
ENSG00000114023.14	-0.00789784	0.254934
ENSG00000114209.13	-0.00738914	0.460094
ENSG00000114302.14	-0.0108898	0.204524
ENSG00000114388.11	-0.0141163	0.40099
ENSG00000114395.9	-0.00518226	0.676852
ENSG00000114473.12	-0.235296	0.0520071
ENSG00000114503.9	0.010665	0.0177505
ENSG00000114573.8	-0.0186063	0.0663666
ENSG00000114648.10	-0.0296512	0.439296
ENSG00000114670.12	0.0135652	0.803115
ENSG00000114737.14	-0.00470238	0.751084
ENSG00000114738.9	-0.00719594	0.349063
ENSG00000114739.12	-0.00304991	0.90924
ENSG00000114745.12	0.015231	0.216505
ENSG00000114767.6	-0.000715534	0.927046
ENSG00000114779.18	-0.00511177	0.271272
ENSG00000114784.3	-0.0035556	0.840843
ENSG00000114790.11	-0.0500258	0.446587
ENSG00000114853.12	-0.012453	0.680144
ENSG00000114857.16	0.00151845	0.729069
ENSG00000114859.13	0.00988063	0.201825
ENSG00000114861.17	-0.0108663	0.191674
ENSG00000114923.15	0.121896	0.0172386
ENSG00000114942.12	-0.00166501	0.101981
ENSG00000114982.16	0.0190089	0.252514
ENSG00000115020.15	-0.00350627	0.781504
ENSG00000115073.7	0.00106276	0.836917
ENSG00000115091.10	-0.00127447	0.658861
ENSG00000115128.6	0.000774821	0.923266
ENSG00000115137.10	-0.056679	0.64991
ENSG00000115170.12	0.0149046	0.556525
ENSG00000115194.9	0.32908	0.283681
ENSG00000115207.12	0.0161796	0.244724
ENSG00000115211.14	0.0283702	0.0668289
ENSG00000115233.10	-0.00440362	0.495696
ENSG00000115234.9	0.000888663	0.864873
ENSG00000115239.20	0.032386	0.874024
ENSG00000115255.9	0.00148312	0.818027
ENSG00000115257.14	0.0306392	0.505064
ENSG00000115267.5	0.0107298	0.105037
ENSG00000115271.9	0.0250192	0.233844
ENSG00000115282.18	0.0541214	0.028314
ENSG00000115295.18	-0.0691701	0.311967
ENSG00000115307.15	0.000238285	0.939249
ENSG00000115317.10	-0.00576224	0.820507
ENSG00000115339.12	-0.007228	0.153019
ENSG00000115365.10	-0.000402806	0.965518
ENSG00000115392.10	0.0227133	0.459382
ENSG00000115414.17	-7.66114e-05	0.574184
ENSG00000115415.17	-0.000506048	0.699188
ENSG00000115446.10	-0.00306193	0.859662
ENSG00000115459.16	0.124333	0.0133064
ENSG00000115464.13	-0.00523743	0.453621
ENSG00000115484.13	-6.08103e-05	0.976354
ENSG00000115486.10	0.000968107	0.968213
ENSG00000115525.15	-0.103052	0.163419
ENSG00000115568.14	0.0189856	0.328109
ENSG00000115661.12	-0.0144345	0.368105
ENSG00000115685.13	0.00550909	0.534951
ENSG00000115687.12	0.0308851	0.156837
ENSG00000115758.11	0.000312198	0.830481
ENSG00000115761.14	0.018219	0.26586
ENSG00000115816.12	0.00869894	0.336291
ENSG00000115825.8	-0.0178297	0.23004
ENSG00000115827.12	-0.0119801	0.690716
ENSG00000115840.12	-0.0100692	0.736881
ENSG00000115844.9	0.291188	0.000273389
ENSG00000115866.9	0.00642883	0.0877964
ENSG00000115875.17	-0.00209463	0.632073
ENSG00000115942.7	0.00349481	0.833194
ENSG00000115946.6	0.000579724	0.965282
ENSG00000115947.12	-0.00667946	0.638829
ENSG00000115956.9	-0.0232881	0.140734
ENSG00000115966.15	-0.00705829	0.645152
ENSG00000116044.14	7.64547e-05	0.990613
ENSG00000116133.10	0.00185248	0.139862
ENSG00000116138.11	-0.0700775	0.00326773
ENSG00000116151.12	-0.0707898	0.551193
ENSG00000116171.15	-0.000911399	0.841806
ENSG00000116198.11	0.00804465	0.737682
ENSG00000116205.9	-0.0161272	0.780865
ENSG00000116209.10	0.000383105	0.828908
ENSG00000116212.13	0.000733055	0.969144
ENSG00000116213.14	-0.00710554	0.673333
ENSG00000116218.11	-1.66502	0.47069
ENSG00000116237.14	-0.00729971	0.253385
ENSG00000116273.5	-0.0147871	0.659397
ENSG00000116285.11	0.000156284	0.969766
ENSG00000116299.15	-0.000607556	0.709603
ENSG00000116455.12	0.0116077	0.117946
ENSG00000116459.9	-0.00354945	0.251969
ENSG00000116539.9	-0.00305135	0.619645
ENSG00000116580.17	0.0187258	0.186088
ENSG00000116586.10	-0.00925895	0.408941
ENSG00000116641.14	0.000506862	0.973629
ENSG00000116667.11	-0.000745666	0.91387
ENSG00000116668.11	-0.134527	0.180376
ENSG00000116670.13	-0.0161794	0.346468
ENSG00000116679.14	2.29872e-06	0.999532
ENSG00000116698.19	0.00751694	0.0772985
ENSG00000116747.11	-0.03781	0.102429
ENSG00000116750.12	-0.00943172	0.479368
ENSG00000116754.12	0.0031623	0.555519
ENSG00000116791.12	0.0113551	0.307076
ENSG00000116830.10	0.00462819	0.777594
ENSG00000116852.13	0.00508975	0.612152
ENSG00000116871.14	4.78207e-05	0.994427
ENSG00000116874.10	-0.0409227	0.175067
ENSG00000116883.8	0.0168302	0.782636
ENSG00000116903.7	-0.00953131	0.771114
ENSG00000116906.10	0.00551512	0.574755
ENSG00000116918.12	-0.0140712	0.404728
ENSG00000116922.13	0.0181989	0.575622
ENSG00000116954.7	-0.0386329	0.308751
ENSG00000116983.11	-1.3382	0.557282
ENSG00000116985.9	0.0285731	0.332518
ENSG00000117054.12	0.00262029	0.785019
ENSG00000117143.12	-0.0152163	0.0655835
ENSG00000117262.17	-0.108055	0.570527
ENSG00000117385.14	0.00115176	0.905954
ENSG00000117394.18	0.00135724	0.0143686
ENSG00000117395.9	0.00182856	0.789583
ENSG00000117399.12	-0.0041329	0.383399
ENSG00000117408.9	0.0121208	0.464226
ENSG00000117475.12	-0.0226472	0.405241
ENSG00000117479.11	-0.020787	0.349977
ENSG00000117500.11	-0.00758524	0.20554
ENSG00000117505.11	-0.0114021	0.208332
ENSG00000117519.14	-0.00206864	0.579909
ENSG00000117543.18	-0.0125519	0.570965
ENSG00000117593.9	-0.0083623	0.511685
ENSG00000117598.10	-1.92232	0.369763
ENSG00000117616.16	0.00911997	0.307075
ENSG00000117620.11	-0.00272752	0.597085
ENSG00000117650.11	-0.00603014	0.704964
ENSG00000117697.13	-0.0421951	0.0905926
ENSG00000117862.10	-0.00661863	0.3594
ENSG00000117877.9	-0.0604982	0.29466
ENSG00000117984.11	-3.64144e-05	0.958004
ENSG00000118007.11	-0.00750172	0.641651
ENSG00000118096.6	-0.0147577	0.580758
ENSG00000118162.12	-0.00197406	0.968161
ENSG00000118181.9	-0.000473733	0.654063
ENSG00000118197.12	-0.00530766	0.897603
ENSG00000118217.5	-0.0160093	0.201818
ENSG00000118246.12	-0.0130668	0.337557
ENSG00000118260.13	-0.0089244	0.53322
ENSG00000118276.10	-0.0288761	0.576356
ENSG00000118298.9	-0.138326	0.730173
ENSG00000118307.17	-2.2656	0.274392
ENSG00000118363.10	-0.00020081	0.986343
ENSG00000118369.11	0.143621	0.0180553
ENSG00000118454.11	-0.0115152	0.666744
ENSG00000118492.15	-0.751429	0.270357
ENSG00000118523.5	-0.000951683	0.601068
ENSG00000118564.13	-0.0332506	0.00534582
ENSG00000118579.10	-0.0274407	0.0666702
ENSG00000118640.9	-0.00166104	0.71136
ENSG00000118655.4	-0.052118	0.228574
ENSG00000118680.11	-0.00265186	0.0638514
ENSG00000118707.8	0.0106892	0.245967
ENSG00000118849.8	0.000647992	0.856951
ENSG00000118855.17	-0.0243585	0.0400487
ENSG00000118894.13	0.0198599	0.618459
ENSG00000118900.13	0.0111173	0.227047
ENSG00000118939.16	0.00788429	0.716581
ENSG00000118965.13	0.0255381	0.216055
ENSG00000118985.13	-0.0169228	0.342799
ENSG00000119013.7	-0.0038068	0.741915
ENSG00000119048.6	-0.00356669	0.667912
ENSG00000119185.11	-0.00756651	0.614389
ENSG00000119203.12	-0.000340353	0.976229
ENSG00000119242.7	0.0144339	0.327841
ENSG00000119321.7	0.000770813	0.964816
ENSG00000119328.10	-0.05677	0.0628832
ENSG00000119383.18	0.000439519	0.903987
ENSG00000119402.15	-0.00162348	0.905357
ENSG00000119421.6	-0.00733464	0.421519
ENSG00000119446.12	-0.0169245	0.403625
ENSG00000119509.11	-0.0525772	0.339148
ENSG00000119523.9	-0.0348006	0.0809713
ENSG00000119537.14	-0.0179285	0.139297
ENSG00000119616.10	-0.00328903	0.864592
ENSG00000119636.14	-0.346309	0.0661932
ENSG00000119638.11	0.00335806	0.747026
ENSG00000119655.7	-0.00288591	0.488751
ENSG00000119669.4	0.00787539	0.634307
ENSG00000119682.15	-0.0104922	0.499466
ENSG00000119686.8	-0.141458	0.0510105
ENSG00000119688.19	0.00384586	0.844528
ENSG00000119705.8	-0.00488675	0.655995
ENSG00000119707.12	0.00460772	0.366838
ENSG00000119711.11	-0.0318404	0.0728636
ENSG00000119715.13	0.203634	0.703272
ENSG00000119723.14	-0.0548915	0.432857
ENSG00000119729.9	-0.0107266	0.546052
ENSG00000119760.14	0.0424113	0.0604458
ENSG00000119778.13	0.00283375	0.873412
ENSG00000119782.12	-0.0569415	0.564993
ENSG00000119844.13	0.0179129	0.179945
ENSG00000119862.11	-0.0223893	0.399627
ENSG00000119878.5	-0.0107809	0.605337
ENSG00000119888.9	0.00058613	0.144789
ENSG00000119906.10	-0.0324994	0.206188
ENSG00000119965.11	0.0385273	0.661622
ENSG00000120008.14	-0.00221081	0.892484
ENSG00000120051.13	-3.76543	0.0903298
ENSG00000120053.10	-0.00120707	0.854357
ENSG00000120253.12	-0.00161951	0.915138
ENSG00000120256.8	0.00632458	0.327057
ENSG00000120265.15	6.87239e-05	0.993612
ENSG00000120334.14	-0.182858	0.0204784
ENSG00000120370.11	-0.0320078	0.458916
ENSG00000120438.10	0.000531918	0.816771
ENSG00000120458.8	0.0487867	0.199483
ENSG00000120509.9	-0.0158799	0.197797
ENSG00000120526.9	-0.0145025	0.238596
ENSG00000120533.11	-0.0070041	0.467646
ENSG00000120539.13	-0.0123115	0.698632
ENSG00000120647.8	-0.00554638	0.920254
ENSG00000120656.10	-0.0629774	0.0699277
ENSG00000120658.11	-0.029026	0.876985
ENSG00000120685.18	0.00147184	0.583501
ENSG00000120688.8	0.0419957	0.112904
ENSG00000120690.12	0.00249121	0.572118
ENSG00000120725.11	0.0019292	0.788842
ENSG00000120742.9	-0.00427136	0.178305
ENSG00000120802.12	-0.00568004	0.0988479
ENSG00000120820.11	-0.0427438	0.316827
ENSG00000120868.12	-0.0242973	0.218167
ENSG00000120889.11	0.00607248	0.187588
ENSG00000120896.12	0.00353276	0.529016
ENSG00000120899.16	0.00486802	0.574884
ENSG00000120925.12	-0.00511606	0.737201
ENSG00000121057.11	0.00454454	0.0798927
ENSG00000121060.13	-0.00661137	0.412683
ENSG00000121068.12	0.00228018	0.930113
ENSG00000121073.12	-0.00125371	0.917298
ENSG00000121101.14	-0.403211	0.626796
ENSG00000121104.6	-0.00657428	0.905204
ENSG00000121289.16	0.00957965	0.726413
ENSG00000121297.6	-0.0295975	0.535556
ENSG00000121310.15	0.0138713	0.147726
ENSG00000121316.9	-0.00377627	0.271598
ENSG00000121440.13	0.0219284	0.112116
ENSG00000121486.10	-0.0129551	0.641294
ENSG00000121579.11	-0.0008994	0.824515
ENSG00000121621.6	0.00867171	0.802161
ENSG00000121766.13	-0.0194432	0.327698
ENSG00000121797.9	-0.0837421	0.0252358
ENSG00000121851.11	0.0353119	0.230249
ENSG00000121879.3	-0.0111746	0.599057
ENSG00000121897.12	-0.052977	0.295691
ENSG00000121931.14	0.0145097	0.571405
ENSG00000121988.16	-0.00931522	0.888295
ENSG00000122008.14	-0.00770932	0.788374
ENSG00000122026.9	-0.000452564	0.638288
ENSG00000122218.13	0.00112054	0.697669
ENSG00000122299.10	0.0442272	0.0383639
ENSG00000122335.12	-0.0699968	0.167438
ENSG00000122376.10	-0.0283977	0.194645
ENSG00000122390.16	0.00678938	0.533592
ENSG00000122432.15	-0.408862	0.469
ENSG00000122435.8	0.0408897	0.290098
ENSG00000122481.15	0.257964	0.00559706
ENSG00000122483.16	0.0235293	0.674333
ENSG00000122484.8	-0.0204441	0.450351
ENSG00000122507.19	-0.0188753	0.678909
ENSG00000122512.13	0.0157058	0.793576
ENSG00000122545.16	0.00091066	0.811353
ENSG00000122548.5	0.408825	0.610536
ENSG00000122550.16	-0.0370683	0.158694
ENSG00000122557.8	-0.0169071	0.479587
ENSG00000122565.17	-1.79805e-05	0.992484
ENSG00000122566.19	0.00115584	0.173029
ENSG00000122592.7	0.0894881	0.000323736
ENSG00000122687.16	4.22397e-05	0.998394
ENSG00000122741.14	-0.0333276	0.0890587
ENSG00000122882.9	0.00128577	0.962101
ENSG00000123064.11	0.00288366	0.505114
ENSG00000123080.9	-0.0326295	0.397283
ENSG00000123094.14	-0.0690689	0.143102
ENSG00000123119.10	-0.0432914	0.749296
ENSG00000123124.12	-0.000430892	0.954617
ENSG00000123154.10	0.0253349	0.533834
ENSG00000123191.12	0.0117649	0.205244
ENSG00000123200.15	0.0128477	0.0158613
ENSG00000123213.21	0.00273793	0.827236
ENSG00000123219.11	-0.00814642	0.706511
ENSG00000123240.15	0.0024974	0.631351
ENSG00000123353.8	-0.0150157	0.235959
ENSG00000123364.4	0.0989119	0.793526
ENSG00000123405.12	0.0681249	0.0204799
ENSG00000123472.11	-0.00954058	0.42435
ENSG00000123562.15	0.00156199	0.524865
ENSG00000123600.17	-0.0290361	0.262827
ENSG00000123684.11	0.00315101	0.498835
ENSG00000123700.4	0.0023868	0.922707
ENSG00000123908.10	-0.00156886	0.751113
ENSG00000123977.8	-2.16689	0.48421
ENSG00000123989.12	0.00179892	0.288517
ENSG00000124074.10	0.0236395	0.307747
ENSG00000124104.17	0.0103598	0.713232
ENSG00000124116.17	0.0367152	0.508766
ENSG00000124140.11	-0.306282	0.476147
ENSG00000124201.13	-0.000482499	0.940555
ENSG00000124207.15	0.000406888	0.871989
ENSG00000124209.3	-0.00203328	0.7538
ENSG00000124217.4	-0.00114512	0.93724
ENSG00000124224.15	-0.0399292	0.383573
ENSG00000124249.6	0.0482962	0.364456
ENSG00000124275.13	0.0136556	0.424029
ENSG00000124357.11	0.0132919	0.379259
ENSG00000124370.9	-0.0925747	0.215996
ENSG00000124383.7	0.0254293	0.0760083
ENSG00000124406.15	-0.0216563	0.0819738
ENSG00000124444.14	-0.0311814	0.444017
ENSG00000124571.16	0.00627757	0.396311
ENSG00000124635.8	-0.0306307	0.565326
ENSG00000124641.13	-0.00821504	0.776082
ENSG00000124659.6	-0.0129835	0.594263
ENSG00000124688.12	-0.00624011	0.721534
ENSG00000124702.16	-0.00401275	0.444292
ENSG00000124721.16	-0.00347601	0.992326
ENSG00000124733.3	-0.0049923	0.581591
ENSG00000124784.7	0.0237126	0.212141
ENSG00000124788.16	-0.00626474	0.553335
ENSG00000124789.10	0.00559804	0.559413
ENSG00000125122.13	0.139553	0.195006
ENSG00000125166.11	0.00188122	0.56156
ENSG00000125285.5	-0.139726	0.702266
ENSG00000125304.8	0.00043934	0.733581
ENSG00000125337.15	0.050856	0.640238
ENSG00000125352.5	0.0322803	0.105645
ENSG00000125354.21	0.0225818	0.13767
ENSG00000125356.6	0.00301994	0.474734
ENSG00000125375.13	-0.00413825	0.876635
ENSG00000125388.18	-0.627693	0.0162657
ENSG00000125445.9	-0.0106512	0.171445
ENSG00000125447.15	0.0155739	0.204391
ENSG00000125457.12	-0.00650589	0.715478
ENSG00000125458.5	-0.00277927	0.820211
ENSG00000125459.13	0.0572636	0.316322
ENSG00000125484.10	-0.00736204	0.629751
ENSG00000125485.16	-0.00271976	0.942799
ENSG00000125505.15	-0.000267451	0.952655
ENSG00000125508.3	0.0366027	0.0993763
ENSG00000125510.14	0.0122369	0.963944
ENSG00000125531.6	-0.220284	0.377866
ENSG00000125633.9	0.0111374	0.424436
ENSG00000125651.12	0.00556206	0.216456
ENSG00000125656.7	-0.00549037	0.283302
ENSG00000125733.16	0.00955027	0.200224
ENSG00000125734.12	0.00141108	0.843528
ENSG00000125743.9	-0.00312352	0.156339
ENSG00000125755.17	0.00612511	0.16794
ENSG00000125779.20	-0.00413069	0.862367
ENSG00000125817.7	-0.000589196	0.846306
ENSG00000125827.7	-0.00698939	0.446211
ENSG00000125850.9	-0.032322	0.303184
ENSG00000125864.10	0.0896033	0.172211
ENSG00000125868.14	-0.00046812	0.673574
ENSG00000125869.8	0.0206145	0.725806
ENSG00000125870.9	0.00138848	0.796801
ENSG00000125871.12	-0.000879504	0.956471
ENSG00000125885.12	0.00657657	0.631104
ENSG00000125895.5	0.0354346	0.0545984
ENSG00000125945.13	-0.0809487	0.0689287
ENSG00000125965.7	0.232122	0.685327
ENSG00000125967.15	0.0111261	0.255465
ENSG00000125970.10	0.000495689	0.536877
ENSG00000125995.14	-0.000609116	0.675073
ENSG00000125999.9	-0.498036	0.505767
ENSG00000126001.14	0.0134838	0.0166358
ENSG00000126003.6	0.00311139	0.314611
ENSG00000126070.17	-0.0103288	0.557759
ENSG00000126088.11	-0.00439568	0.659193
ENSG00000126106.12	-0.00812458	0.695468
ENSG00000126107.13	0.00140567	0.78862
ENSG00000126214.19	0.0101514	0.514554
ENSG00000126215.12	0.00668754	0.740246
ENSG00000126226.20	0.00650748	0.321587
ENSG00000126261.11	-0.00330549	0.439258
ENSG00000126264.8	-0.0143227	0.870664
ENSG00000126432.12	0.000356575	0.544701
ENSG00000126453.8	-0.0164744	0.29445
ENSG00000126456.14	0.00925275	0.148375
ENSG00000126524.8	0.0045759	0.342984
ENSG00000126749.13	-0.0239512	0.311209
ENSG00000126756.10	-0.00272741	0.612869
ENSG00000126768.11	0.000926382	0.835516
ENSG00000126773.11	-0.0127313	0.461128
ENSG00000126790.10	0.161368	0.0688712
ENSG00000126803.9	-0.0146499	0.28226
ENSG00000126814.6	-0.0306762	0.315778
ENSG00000126858.15	-0.0195993	0.268838
ENSG00000126890.13	-0.230075	0.661082
ENSG00000126945.8	0.00919231	0.0494608
ENSG00000127054.17	0.00110838	0.775733
ENSG00000127125.8	-0.0133619	0.232346
ENSG00000127220.5	0.0227054	0.687859
ENSG00000127249.13	0.0651601	0.668941
ENSG00000127328.20	0.00645678	0.696429
ENSG00000127415.11	0.00891215	0.629202
ENSG00000127419.15	0.00874071	0.558808
ENSG00000127423.9	-0.0314553	0.689467
ENSG00000127445.12	-0.00835252	0.424664
ENSG00000127452.7	0.0157814	0.430396
ENSG00000127463.12	-0.0132853	0.212498
ENSG00000127481.13	-0.000900592	0.783862
ENSG00000127526.12	-0.0230852	0.0972463
ENSG00000127528.5	-0.00280152	0.770838
ENSG00000127554.12	-0.00150541	0.917787
ENSG00000127561.13	0.0602274	0.0023045
ENSG00000127586.15	0.00314118	0.656877
ENSG00000127720.6	-0.147304	0.198353
ENSG00000127774.6	-0.108946	0.254292
ENSG00000127837.8	0.00172301	0.616789
ENSG00000127838.12	0.00362125	0.371357
ENSG00000127870.15	0.0118303	0.0261373
ENSG00000127903.13	-0.37771	0.596716
ENSG00000127952.15	-0.0113243	0.448526
ENSG00000127980.14	-0.00132149	0.935921
ENSG00000127990.14	0.0166689	0.670795
ENSG00000127993.13	0.00085159	0.987747
ENSG00000128050.7	-0.00247988	0.350331
ENSG00000128059.7	-0.0244239	0.24084
ENSG00000128185.8	-0.0264799	0.187977
ENSG00000128309.15	-0.000710876	0.711675
ENSG00000128311.12	-0.00295708	0.242219
ENSG00000128342.4	0.0095472	0.278006
ENSG00000128408.8	0.215157	0.0191891
ENSG00000128487.15	-0.001276	0.933735
ENSG00000128512.18	-0.0548542	0.181701
ENSG00000128513.13	-0.00467609	0.810398
ENSG00000128524.4	-0.00478034	0.313479
ENSG00000128536.14	0.0513202	0.504854
ENSG00000128585.16	-0.00370572	0.670032
ENSG00000128590.4	-0.0173985	0.236221
ENSG00000128626.10	-0.009114	0.162198
ENSG00000128641.16	-0.00552393	0.228528
ENSG00000128645.12	0.211551	0.261401
ENSG00000128652.10	-0.133262	0.736377
ENSG00000128694.10	-0.102795	0.291628
ENSG00000128699.12	0.00376103	0.842218
ENSG00000128789.19	-0.0257718	0.0298495
ENSG00000128791.10	-0.0173871	0.15684
ENSG00000128872.8	0.00901486	0.642109
ENSG00000128886.10	-0.137801	0.438425
ENSG00000128915.10	-0.0154503	0.323986
ENSG00000128923.9	-0.0271438	0.316536
ENSG00000128951.12	-0.00386781	0.63518
ENSG00000129003.14	-0.00338329	0.467851
ENSG00000129055.11	0.00316097	0.800167
ENSG00000129071.8	0.0182152	0.43996
ENSG00000129084.16	0.00332316	0.614261
ENSG00000129128.11	-0.00699887	0.112833
ENSG00000129197.13	0.0210166	0.236325
ENSG00000129214.13	0.0134855	0.977516
ENSG00000129219.12	-0.0088557	0.661344
ENSG00000129235.9	-0.00543368	0.469367
ENSG00000129245.10	0.0039994	0.82455
ENSG00000129250.10	-0.000345146	0.893493
ENSG00000129255.13	-0.00573887	0.406555
ENSG00000129317.13	-0.0158015	0.323589
ENSG00000129351.16	0.00239062	0.24458
ENSG00000129422.12	0.00239989	0.614656
ENSG00000129472.11	-0.0969357	0.0523754
ENSG00000129473.8	0.0138055	0.412123
ENSG00000129474.14	0.012312	0.450811
ENSG00000129484.12	0.0229217	0.486466
ENSG00000129493.13	-0.0268152	0.257334
ENSG00000129514.5	-0.010272	0.310779
ENSG00000129535.11	-0.262466	0.377119
ENSG00000129559.11	-0.0050341	0.592238
ENSG00000129595.11	-0.0831979	0.39509
ENSG00000129654.7	-0.00454403	0.812416
ENSG00000129673.8	-0.408672	0.585536
ENSG00000129933.19	0.0164711	0.0819362
ENSG00000130023.14	0.0239288	0.456639
ENSG00000130024.13	0.00869428	0.386537
ENSG00000130035.5	-0.00274206	0.819451
ENSG00000130066.15	0.00108449	0.333419
ENSG00000130150.10	-0.00118379	0.96282
ENSG00000130165.9	-0.00305438	0.760127
ENSG00000130175.8	0.00162071	0.220862
ENSG00000130193.7	-0.00326777	0.468883
ENSG00000130204.11	-0.000154549	0.96652
ENSG00000130234.9	0.000858537	0.802611
ENSG00000130299.15	-0.00177734	0.933638
ENSG00000130303.11	-0.00228447	0.38558
ENSG00000130311.9	-0.0123686	0.323766
ENSG00000130313.5	-0.00665358	0.304248
ENSG00000130332.13	-0.00165951	0.524574
ENSG00000130347.11	0.0105791	0.797864
ENSG00000130348.10	-0.00997573	0.597663
ENSG00000130396.19	0.00451134	0.213157
ENSG00000130522.5	-0.00227701	0.33195
ENSG00000130559.17	0.012015	0.528486
ENSG00000130653.14	0.0393339	0.0853224
ENSG00000130675.13	0.0371325	0.141251
ENSG00000130701.3	0.015726	0.103417
ENSG00000130725.6	-0.00564319	0.385891
ENSG00000130726.10	0.000960792	0.243657
ENSG00000130731.14	-0.00490812	0.314952
ENSG00000130733.9	-0.00598434	0.428477
ENSG00000130749.8	0.017596	0.220483
ENSG00000130755.11	-0.0807812	0.102107
ENSG00000130818.9	0.0122483	0.719079
ENSG00000130821.14	-0.000568566	0.753334
ENSG00000130822.14	0.0159997	0.698142
ENSG00000130856.14	-0.0350933	0.48385
ENSG00000131023.11	-0.00490529	0.770686
ENSG00000131037.13	0.0061708	0.378617
ENSG00000131042.12	-0.0833549	0.14264
ENSG00000131044.15	-0.893863	0.353152
ENSG00000131061.12	0.0475243	0.358052
ENSG00000131067.15	0.0249588	0.00100319
ENSG00000131069.18	0.00129337	0.617225
ENSG00000131096.9	0.0228002	0.0368994
ENSG00000131100.11	-0.00702023	0.352292
ENSG00000131143.7	-0.000391714	0.596796
ENSG00000131148.7	-0.00891954	0.48588
ENSG00000131165.13	0.00149783	0.567701
ENSG00000131171.11	-0.00509056	0.366551
ENSG00000131351.13	-0.0273311	0.580839
ENSG00000131355.13	-1.04577	0.0581598
ENSG00000131373.13	-0.0162303	0.549861
ENSG00000131374.13	-0.00243247	0.802696
ENSG00000131375.8	-0.0159956	0.461359
ENSG00000131462.6	-0.00247615	0.762201
ENSG00000131467.9	-0.00414795	0.363315
ENSG00000131473.15	0.000595133	0.852793
ENSG00000131495.7	-0.00781217	0.25303
ENSG00000131503.19	0.0407639	0.28056
ENSG00000131504.14	-0.00169029	0.651406
ENSG00000131652.12	0.00252345	0.768332
ENSG00000131653.11	-0.0016052	0.636897
ENSG00000131668.12	-0.0359858	0.769138
ENSG00000131732.10	-0.00161192	0.934942
ENSG00000131773.12	0.0085662	0.671611
ENSG00000131778.16	0.012068	0.2908
ENSG00000131779.9	-0.00410117	0.8297
ENSG00000131781.11	0.00500528	0.771536
ENSG00000131791.7	-0.0105205	0.628824
ENSG00000131797.11	0.0562194	0.00149292
ENSG00000131845.13	-0.122266	0.181018
ENSG00000131848.8	-0.0376269	0.720783
ENSG00000131849.10	-0.520389	0.09174
ENSG00000131876.15	0.00723203	0.62264
ENSG00000131944.8	0.0887038	0.430462
ENSG00000131951.9	-0.137583	0.836435
ENSG00000132000.10	-0.0550884	0.183595
ENSG00000132016.10	0.00290064	0.947543
ENSG00000132017.9	0.00200257	0.820525
ENSG00000132024.16	0.00063858	0.886907
ENSG00000132128.15	0.00875444	0.354005
ENSG00000132141.12	-0.195872	0.276872
ENSG00000132207.16	-0.11977	0.960691
ENSG00000132254.11	0.00308319	0.652481
ENSG00000132256.17	0.0373777	0.144517
ENSG00000132259.11	1.18778	0.179867
ENSG00000132275.9	0.0406507	0.245777
ENSG00000132286.10	0.0105964	0.40592
ENSG00000132300.17	-0.00502583	0.478001
ENSG00000132305.19	0.000918684	0.875814
ENSG00000132361.15	0.00113846	0.582284
ENSG00000132376.18	-0.0023209	0.890045
ENSG00000132383.10	-0.000962397	0.891523
ENSG00000132394.9	0.00900663	0.612711
ENSG00000132424.13	0.00835857	0.101282
ENSG00000132432.12	0.00566373	0.481407
ENSG00000132466.16	-0.00880186	0.137622
ENSG00000132478.8	0.0282673	0.0344843
ENSG00000132485.11	0.00326927	0.642471
ENSG00000132541.9	0.00712298	0.609777
ENSG00000132549.17	-0.0106739	0.382691
ENSG00000132581.8	-0.000836374	0.933597
ENSG00000132589.14	-0.00044823	0.910378
ENSG00000132591.10	0.0110314	0.28329
ENSG00000132600.15	-0.00250359	0.830232
ENSG00000132603.12	-0.00793825	0.51056
ENSG00000132635.15	0.0152819	0.030662
ENSG00000132646.9	-0.000970132	0.65388
ENSG00000132661.3	-0.0144825	0.283804
ENSG00000132664.10	-0.00763165	0.821243
ENSG00000132692.17	0.111619	0.145874
ENSG00000132716.17	0.0196953	0.120992
ENSG00000132718.8	-0.0284827	0.398128
ENSG00000132740.7	0.0414535	0.183616
ENSG00000132763.13	-0.0549227	0.136462
ENSG00000132773.10	-0.0191449	0.530303
ENSG00000132781.16	0.0126134	0.543242
ENSG00000132801.6	0.0132442	0.687896
ENSG00000132823.9	-0.00415695	0.486452
ENSG00000132837.13	0.428924	0.24888
ENSG00000132846.5	-0.0300546	0.172195
ENSG00000132849.17	-0.00202149	0.764521
ENSG00000132906.16	-0.00864797	0.840647
ENSG00000132950.17	0.0378122	0.132226
ENSG00000132952.10	0.0110535	0.419853
ENSG00000133027.16	-0.00753743	0.660482
ENSG00000133028.9	-0.0152205	0.298963
ENSG00000133112.15	-7.35518e-05	0.530016
ENSG00000133114.16	0.00387834	0.706022
ENSG00000133247.12	0.0355136	0.0895516
ENSG00000133302.11	0.00272373	0.961825
ENSG00000133460.18	0.0792134	0.169194
ENSG00000133597.8	-0.00529476	0.54832
ENSG00000133639.4	0.00269711	0.54883
ENSG00000133640.17	-0.843009	0.509787
ENSG00000133641.16	-0.0517692	0.0758525
ENSG00000133678.12	-0.0186792	0.437119
ENSG00000133740.9	-0.0238848	0.277305
ENSG00000133773.10	-0.00628123	0.702839
ENSG00000133872.12	-0.000408896	0.854173
ENSG00000133943.19	-0.0188049	0.141236
ENSG00000133958.12	-0.177182	0.829499
ENSG00000133980.4	-0.141919	0.677224
ENSG00000133985.2	-0.00334507	0.869426
ENSG00000134001.11	-0.00998661	0.147738
ENSG00000134077.14	-0.0110009	0.54948
ENSG00000134107.4	0.00217535	0.0758405
ENSG00000134109.9	-0.0133715	0.206514
ENSG00000134121.8	0.0095731	0.812723
ENSG00000134146.10	-0.0181393	0.69845
ENSG00000134153.8	-0.00823548	0.45419
ENSG00000134215.14	-0.00162187	0.596263
ENSG00000134247.9	-0.00270686	0.590718
ENSG00000134255.12	-0.0410017	0.0943278
ENSG00000134262.11	0.00116746	0.96461
ENSG00000134278.13	-0.050092	0.177812
ENSG00000134283.16	-0.0099335	0.48771
ENSG00000134291.10	-0.00313244	0.238023
ENSG00000134297.6	0.380346	0.0031887
ENSG00000134321.10	0.00816866	0.405703
ENSG00000134324.10	-0.00722618	0.455673
ENSG00000134326.10	-0.00274216	0.885208
ENSG00000134352.18	-0.0132608	0.114192
ENSG00000134444.12	-0.0164796	0.340954
ENSG00000134452.18	-0.00342056	0.840201
ENSG00000134461.14	-0.0850544	0.163766
ENSG00000134575.8	0.000268842	0.984136
ENSG00000134690.9	-0.00589338	0.588078
ENSG00000134717.16	-0.0107548	0.512124
ENSG00000134748.12	0.00736202	0.597433
ENSG00000134755.13	-0.00322844	0.382647
ENSG00000134758.12	-0.0178458	0.331701
ENSG00000134759.12	-0.0228125	0.115385
ENSG00000134779.13	-0.019245	0.104313
ENSG00000134824.12	0.00423712	0.151567
ENSG00000134825.12	-0.00654929	0.24965
ENSG00000134851.11	-0.0254292	0.00398533
ENSG00000134852.13	-0.02073	0.103357
ENSG00000134882.14	0.00122892	0.721131
ENSG00000134897.12	0.0196049	0.261383
ENSG00000134901.11	0.00478488	0.922995
ENSG00000134905.15	0.00671037	0.132215
ENSG00000134910.11	0.00209952	0.499799
ENSG00000134987.10	-0.00464623	0.681571
ENSG00000134996.11	-0.0149829	0.29545
ENSG00000135018.12	-0.00996944	0.0616003
ENSG00000135045.6	-0.0411097	0.232704
ENSG00000135077.7	-0.0818399	0.055965
ENSG00000135097.5	0.00922818	0.806906
ENSG00000135119.13	0.0960184	0.0123208
ENSG00000135164.17	0.00467476	0.645646
ENSG00000135205.13	0.0507794	0.277504
ENSG00000135211.5	-0.0254935	0.478274
ENSG00000135241.15	-0.0167599	0.346641
ENSG00000135298.12	-0.336912	0.565317
ENSG00000135336.13	0.0102078	0.629155
ENSG00000135404.10	-0.000490489	0.592619
ENSG00000135424.14	0.0120894	0.307417
ENSG00000135441.6	-0.0121389	0.280367
ENSG00000135446.15	-0.00293408	0.499779
ENSG00000135473.13	0.0262197	0.0431373
ENSG00000135486.16	0.000681744	0.400643
ENSG00000135502.15	0.350575	0.53741
ENSG00000135517.6	-1.15763	0.342267
ENSG00000135525.17	0.00610269	0.245112
ENSG00000135535.13	3.23195e-05	0.9748
ENSG00000135540.10	0.000476979	0.938237
ENSG00000135541.19	-0.0195941	0.463708
ENSG00000135549.13	-0.0500297	0.11298
ENSG00000135587.7	-0.00969942	0.587683
ENSG00000135617.3	-0.024209	0.224638
ENSG00000135624.14	0.00193781	0.15962
ENSG00000135637.12	0.136532	0.043554
ENSG00000135677.9	-0.0084994	0.0784163
ENSG00000135698.8	0.0184459	0.439797
ENSG00000135720.11	0.00210578	0.713718
ENSG00000135722.7	0.0412793	0.274995
ENSG00000135763.8	-0.0157825	0.579688
ENSG00000135801.8	-0.0280098	0.296329
ENSG00000135837.14	-0.0145645	0.220908
ENSG00000135870.10	-0.0110573	0.405903
ENSG00000135903.17	-0.735773	0.478667
ENSG00000135913.9	-0.0350209	0.398541
ENSG00000135930.12	-0.0119208	0.234822
ENSG00000135951.13	0.0121083	0.870469
ENSG00000135953.9	0.0108691	0.6051
ENSG00000135956.7	0.00624727	0.3509
ENSG00000135972.7	0.0304452	0.0525757
ENSG00000135974.8	0.000359322	0.987149
ENSG00000136002.15	0.00193173	0.968208
ENSG00000136014.10	0.611758	0.154216
ENSG00000136021.16	-0.0138163	0.117021
ENSG00000136044.10	-0.0161174	0.188332
ENSG00000136051.12	-0.0048575	0.624314
ENSG00000136108.13	0.000959969	0.885307
ENSG00000136122.14	0.0124252	0.671191
ENSG00000136143.12	5.83825e-06	0.999225
ENSG00000136160.13	-0.0238228	0.527325
ENSG00000136167.12	-0.00200019	0.571113
ENSG00000136169.15	0.00594969	0.794048
ENSG00000136261.13	-0.00458776	0.2299
ENSG00000136305.10	-1.08342	0.408012
ENSG00000136319.10	-0.0548675	0.14853
ENSG00000136367.13	0.00161856	0.987773
ENSG00000136378.13	-0.00189485	0.935485
ENSG00000136425.11	0.0119208	0.643898
ENSG00000136449.12	-0.189605	0.776538
ENSG00000136450.11	0.000252443	0.943673
ENSG00000136451.7	-0.0145084	0.374193
ENSG00000136490.7	-0.0089989	0.739887
ENSG00000136504.10	-0.0237917	0.266569
ENSG00000136521.11	-0.00476411	0.399909
ENSG00000136522.12	0.00324535	0.808595
ENSG00000136536.13	-0.00352816	0.683215
ENSG00000136630.12	0.0140718	0.72022
ENSG00000136699.18	0.0121238	0.0770396
ENSG00000136710.8	0.0199981	0.120073
ENSG00000136718.8	0.000990482	0.856696
ENSG00000136738.13	-0.0549243	0.0510424
ENSG00000136758.17	-0.00297282	0.542452
ENSG00000136802.10	0.00677641	0.128441
ENSG00000136868.10	-0.0166603	0.0731296
ENSG00000136870.9	-0.040608	0.164435
ENSG00000136874.9	-0.0385034	0.294562
ENSG00000136875.11	-0.0167613	0.239912
ENSG00000136897.7	-0.0217351	0.166448
ENSG00000136925.13	-0.0608271	0.347847
ENSG00000136937.11	-0.00770798	0.484576
ENSG00000136942.13	-0.0010614	0.0994121
ENSG00000136944.16	0.0874142	0.760431
ENSG00000136950.12	-0.00776555	0.397397
ENSG00000136986.8	-0.00788791	0.228211
ENSG00000137055.13	-0.00907624	0.588715
ENSG00000137074.17	-0.0269554	0.244488
ENSG00000137076.17	0.00032749	0.788164
ENSG00000137094.13	0.009553	0.807217
ENSG00000137101.11	-0.16712	0.216989
ENSG00000137103.15	0.0163436	0.196158
ENSG00000137133.9	-0.0273241	0.233581
ENSG00000137210.12	-0.00880324	0.406947
ENSG00000137216.17	0.00035068	0.946204
ENSG00000137269.13	-0.00605465	0.746588
ENSG00000137285.9	0.0168298	0.342733
ENSG00000137310.10	0.00962958	0.576601
ENSG00000137312.13	0.00124791	0.693314
ENSG00000137364.4	-0.0113698	0.143886
ENSG00000137413.14	0.0158981	0.561686
ENSG00000137434.10	-0.161392	0.710002
ENSG00000137449.14	-0.0214552	0.437923
ENSG00000137492.6	-0.00892322	0.376255
ENSG00000137494.12	-0.0294825	0.671395
ENSG00000137497.16	0.00716639	0.0352737
ENSG00000137500.8	-0.00868992	0.578098
ENSG00000137502.8	0.0117504	0.586601
ENSG00000137522.16	0.0237145	0.394274
ENSG00000137571.9	-0.00838172	0.878868
ENSG00000137574.9	-0.0134943	0.321885
ENSG00000137601.14	-0.0610988	0.223451
ENSG00000137642.11	0.000721999	0.731893
ENSG00000137656.10	-0.0292751	0.338243
ENSG00000137693.12	0.00399483	0.377905
ENSG00000137720.6	-0.0247077	0.318544
ENSG00000137764.18	-0.0439431	0.227301
ENSG00000137770.12	-0.0226119	0.179524
ENSG00000137804.11	-0.00208639	0.779322
ENSG00000137807.12	-0.00285547	0.873171
ENSG00000137814.8	-0.0226953	0.3291
ENSG00000137819.12	-0.0355226	0.0722642
ENSG00000137821.10	-0.0738078	0.342136
ENSG00000137857.16	0.0233575	0.387399
ENSG00000137871.18	-0.00751941	0.696026
ENSG00000137936.15	0.0129039	0.607507
ENSG00000137960.5	0.0019256	0.867898
ENSG00000137976.7	-1.8185	0.206938
ENSG00000137996.11	0.00779443	0.679611
ENSG00000138032.19	0.0140115	0.379568
ENSG00000138074.13	0.00285906	0.269332
ENSG00000138075.10	0.354836	0.00606152
ENSG00000138078.14	0.00973606	0.459254
ENSG00000138081.18	-0.00751006	0.752143
ENSG00000138083.4	-0.357049	0.379079
ENSG00000138085.15	-0.00553376	0.239065
ENSG00000138092.9	0.0024687	0.951779
ENSG00000138172.9	-0.0219128	0.48168
ENSG00000138175.8	-0.0334784	0.226471
ENSG00000138286.13	-0.00766536	0.837516
ENSG00000138375.11	0.0608411	0.0403645
ENSG00000138376.9	-0.0374345	0.229864
ENSG00000138400.11	-0.56127	0.414919
ENSG00000138413.12	-0.000514662	0.833151
ENSG00000138433.14	0.0153937	0.200859
ENSG00000138434.15	0.000235774	0.948143
ENSG00000138442.8	-0.0146031	0.259481
ENSG00000138459.7	-0.0267719	0.1855
ENSG00000138463.8	-0.0653227	0.174666
ENSG00000138496.15	-0.0136038	0.0660928
ENSG00000138614.13	-0.00871035	0.501093
ENSG00000138629.14	-0.0101833	0.501361
ENSG00000138640.13	0.00219161	0.737776
ENSG00000138650.8	-0.743207	0.461619
ENSG00000138658.14	-0.0226803	0.683484
ENSG00000138660.10	-0.0204254	0.233146
ENSG00000138668.17	0.00190187	0.536359
ENSG00000138674.15	-0.00435129	0.347234
ENSG00000138686.8	-0.101336	0.11897
ENSG00000138696.9	-0.0660165	0.57696
ENSG00000138698.13	-0.0315809	0.0455238
ENSG00000138756.16	-0.180851	0.01424
ENSG00000138757.13	-0.00853564	0.0297958
ENSG00000138760.7	-0.00618469	0.0555842
ENSG00000138768.13	-0.00914429	0.187944
ENSG00000138802.10	-0.038589	0.0243956
ENSG00000138814.15	-0.0083096	0.453867
ENSG00000138823.11	0.00865656	0.0420037
ENSG00000138867.15	-0.00744579	0.155333
ENSG00000138942.14	-0.0159902	0.616398
ENSG00000139117.12	0.00705077	0.883849
ENSG00000139163.14	-0.00902951	0.128301
ENSG00000139180.9	-0.00235534	0.640734
ENSG00000139182.12	0.0219586	0.0323882
ENSG00000139187.8	-0.970115	0.077945
ENSG00000139192.10	-0.0105425	0.208564
ENSG00000139194.6	0.00888475	0.91491
ENSG00000139197.9	-0.000593984	0.954914
ENSG00000139211.6	0.0202246	0.0254904
ENSG00000139233.5	-0.014696	0.537228
ENSG00000139263.10	-0.0266043	0.108273
ENSG00000139266.5	0.0205961	0.311701
ENSG00000139323.12	-0.00718594	0.384207
ENSG00000139324.10	-0.0504297	0.054423
ENSG00000139343.9	-0.0024217	0.679674
ENSG00000139344.6	0.678504	0.070654
ENSG00000139352.3	-6.86381	0.191543
ENSG00000139372.13	-0.0138631	0.61796
ENSG00000139405.14	-0.0327217	0.107793
ENSG00000139428.10	-0.00217385	0.843163
ENSG00000139433.8	-0.0342967	0.0866134
ENSG00000139496.14	0.00139751	0.808019
ENSG00000139517.7	0.00714629	0.253575
ENSG00000139537.9	-0.069252	0.706522
ENSG00000139546.9	-0.00712722	0.577343
ENSG00000139579.11	-0.00417648	0.676536
ENSG00000139618.13	-0.00595258	0.705994
ENSG00000139625.11	0.00617562	0.890935
ENSG00000139631.17	0.0546564	0.0218417
ENSG00000139637.12	-0.00171748	0.862151
ENSG00000139644.11	-0.000811055	0.252775
ENSG00000139651.10	-0.00431174	0.868818
ENSG00000139687.12	-0.00322457	0.62664
ENSG00000139697.10	-0.0165384	0.176101
ENSG00000139718.9	0.00055849	0.966733
ENSG00000139725.6	-0.0392746	0.358382
ENSG00000139746.14	0.00367912	0.477333
ENSG00000139826.5	-0.0044646	0.761112
ENSG00000139842.13	0.006048	0.0845083
ENSG00000139865.15	0.30829	0.29073
ENSG00000139910.18	0.079752	0.568215
ENSG00000139946.8	-0.00111642	0.970069
ENSG00000139971.14	0.0184826	0.761027
ENSG00000139974.14	-0.139681	0.128639
ENSG00000140006.10	-0.0107427	0.788401
ENSG00000140025.14	-0.0225812	0.75122
ENSG00000140044.11	0.0150463	0.506889
ENSG00000140105.16	0.000720275	0.130545
ENSG00000140107.10	-0.0513934	0.937107
ENSG00000140153.16	-0.05931	0.261178
ENSG00000140254.11	-9.96875e-05	0.999387
ENSG00000140262.16	0.00241106	0.385041
ENSG00000140264.18	-0.000913073	0.363861
ENSG00000140274.12	-0.00917216	0.126823
ENSG00000140279.11	-0.00124803	0.271311
ENSG00000140280.12	-0.0222268	0.543831
ENSG00000140284.9	-0.0106458	0.400564
ENSG00000140319.9	-0.000395329	0.916879
ENSG00000140382.13	0.00823129	0.77735
ENSG00000140395.7	-0.0171907	0.164783
ENSG00000140398.12	0.0321604	0.12211
ENSG00000140400.13	0.0187065	0.00167558
ENSG00000140403.11	-0.00455523	0.720143
ENSG00000140406.3	-0.0129805	0.195042
ENSG00000140463.12	-0.100802	0.104449
ENSG00000140464.18	-0.00591847	0.265847
ENSG00000140471.15	-0.088164	0.155618
ENSG00000140521.10	0.00636465	0.501709
ENSG00000140526.15	0.00105454	0.475288
ENSG00000140527.13	-0.566249	0.43059
ENSG00000140598.12	-0.0131535	0.533848
ENSG00000140623.12	-1.25237	0.757463
ENSG00000140632.15	0.00827037	0.0806246
ENSG00000140682.17	0.000123904	0.99023
ENSG00000140694.15	0.0246913	0.0172525
ENSG00000140718.17	0.0119777	0.565126
ENSG00000140740.9	0.000154018	0.93442
ENSG00000140743.6	0.0330906	0.000842613
ENSG00000140750.15	0.0139217	0.217501
ENSG00000140795.11	-1.752	0.258673
ENSG00000140829.10	0.01479	0.0231876
ENSG00000140830.7	-0.0308258	0.480962
ENSG00000140832.8	-0.00529985	0.728336
ENSG00000140836.13	0.00113886	0.896718
ENSG00000140839.10	-0.0123889	0.990948
ENSG00000140848.15	-0.00198667	0.780147
ENSG00000140943.15	0.0040263	0.56281
ENSG00000140948.10	0.00809376	0.394645
ENSG00000140987.18	0.0899932	0.722477
ENSG00000140988.14	-0.000290873	0.245612
ENSG00000140993.9	0.265513	0.310725
ENSG00000141012.11	0.00403408	0.819735
ENSG00000141013.13	0.0603352	0.0512945
ENSG00000141027.19	-0.0028621	0.480823
ENSG00000141034.8	-0.0607128	0.301253
ENSG00000141084.9	0.0185263	0.280664
ENSG00000141258.11	0.0144491	0.313192
ENSG00000141294.8	0.0929627	0.784617
ENSG00000141367.10	-0.00227695	0.196366
ENSG00000141378.14	-0.0124935	0.537072
ENSG00000141424.11	-0.0168465	0.238562
ENSG00000141431.8	-0.0644313	0.634464
ENSG00000141448.7	-0.00801785	0.513985
ENSG00000141449.13	0.0144735	0.874213
ENSG00000141456.13	0.0100598	0.102473
ENSG00000141497.12	-0.0902952	0.377278
ENSG00000141499.15	-0.0165575	0.594863
ENSG00000141506.12	-0.0857956	0.190934
[truncated: 4,121 more rows]

## Sheet: BG.DFI.HNSC
Gene	Coefficient	Logrank p-value
ENSG00000000419.11	0.00857434	0.498511
ENSG00000001561.6	0.0356701	0.162435
ENSG00000001629.8	-0.00384807	0.710423
ENSG00000001631.13	-0.0134273	0.526701
ENSG00000002016.15	-0.091646	0.4043
ENSG00000002933.6	0.0302712	0.000389874
ENSG00000003056.6	0.00184318	0.800617
ENSG00000003147.16	0.00531441	0.852892
ENSG00000003249.12	-0.00607922	0.712887
ENSG00000003509.14	0.0220559	0.766678
ENSG00000004139.12	0.0619954	0.452862
ENSG00000004142.10	-0.00631389	0.341479
ENSG00000004455.15	0.000165429	0.972426
ENSG00000004478.7	-0.00265542	0.318528
ENSG00000004700.14	-0.000147269	0.985817
ENSG00000004776.10	0.0116306	0.00130287
ENSG00000004799.7	0.00940277	0.0989313
ENSG00000004961.13	0.0125436	0.498414
ENSG00000005001.8	-0.00353011	0.444455
ENSG00000005022.5	-0.000603367	0.63036
ENSG00000005073.5	0.0690879	0.407706
ENSG00000005100.11	-0.0241217	0.278104
ENSG00000005156.10	-0.0335472	0.167127
ENSG00000005175.8	0.00798287	0.801172
ENSG00000005194.13	-0.010543	0.408047
ENSG00000005206.15	-0.00644382	0.653099
ENSG00000005448.15	-0.0222126	0.251968
ENSG00000005469.10	-0.00386257	0.815238
ENSG00000005483.18	-0.00201502	0.799668
ENSG00000005513.9	-0.051223	0.488399
ENSG00000005812.9	0.0182064	0.0408534
ENSG00000005884.16	0.000424504	0.314179
ENSG00000005889.14	0.0230079	0.166496
ENSG00000006016.9	-0.0250508	0.242442
ENSG00000006118.13	-0.000741385	0.744812
ENSG00000006125.15	0.00319222	0.205015
ENSG00000006432.14	-0.014748	0.186785
ENSG00000006459.9	0.00282743	0.657909
ENSG00000006530.14	0.000828143	0.976496
ENSG00000006576.15	0.0136692	0.477315
ENSG00000006634.6	-0.027807	0.341097
ENSG00000006638.10	-0.0766138	0.560115
ENSG00000006695.9	-0.0275199	0.530971
ENSG00000006712.13	-0.0219608	0.0527254
ENSG00000006740.15	-0.0351502	0.632807
ENSG00000006747.13	0.0195104	0.298382
ENSG00000006837.10	-0.275528	0.746066
ENSG00000007001.11	-0.336975	0.937937
ENSG00000007255.9	-0.000971226	0.956217
ENSG00000007350.15	-0.111443	0.710659
ENSG00000007376.6	-0.0293381	0.102474
ENSG00000007384.14	-0.0301301	0.0760572
ENSG00000007520.3	-0.00594082	0.429797
ENSG00000007545.14	-0.0866246	0.0802984
ENSG00000008018.8	-0.000146372	0.939378
ENSG00000008128.21	0.0147938	0.879309
ENSG00000008300.13	-0.000527997	0.972823
ENSG00000008382.14	-0.00980919	0.679272
ENSG00000008405.10	-0.0184198	0.569581
ENSG00000008735.13	0.00227316	0.891779
ENSG00000008869.10	0.00482233	0.80977
ENSG00000008952.15	9.7298e-06	0.998247
ENSG00000008988.8	-5.29841e-05	0.882688
ENSG00000009413.14	-0.0112637	0.583986
ENSG00000009830.10	-0.0338014	0.15582
ENSG00000010030.12	-0.000561576	0.959518
ENSG00000010072.14	0.000389144	0.992795
ENSG00000010244.15	-0.002039	0.766371
ENSG00000010282.13	0.0846342	3.05811e-05
ENSG00000010292.11	-0.000571601	0.865324
ENSG00000010318.18	-0.0954845	0.529253
ENSG00000010361.12	-0.0105849	0.702522
ENSG00000010671.14	0.0910436	0.026822
ENSG00000010803.15	-0.0213936	0.316688
ENSG00000011021.20	0.031926	0.493227
ENSG00000011028.12	-0.000115075	0.92682
ENSG00000011114.13	-0.0169984	0.162013
ENSG00000011132.10	-0.0441039	0.314835
ENSG00000011258.14	-0.0191577	0.649711
ENSG00000011260.12	-0.00555618	0.762046
ENSG00000011295.14	-0.0189105	0.351932
ENSG00000011405.12	0.00710533	0.545815
ENSG00000011426.9	-0.00127971	0.761045
ENSG00000011478.10	-0.0128211	0.705445
ENSG00000011566.13	0.000150351	0.995204
ENSG00000012048.18	-0.00303058	0.844238
ENSG00000012171.16	-0.00807891	0.627837
ENSG00000012660.12	0.00263787	0.570703
ENSG00000012963.12	-0.0354267	0.0588589
ENSG00000013016.13	-0.00575708	0.623362
ENSG00000013364.17	0.000220359	0.89598
ENSG00000013375.14	-0.00347404	0.809433
ENSG00000013392.7	0.0454086	0.711693
ENSG00000013523.8	-0.0347426	0.181946
ENSG00000013563.12	-0.0145746	0.433833
ENSG00000013573.15	-0.0222948	0.220913
ENSG00000013583.7	0.00377496	0.855604
ENSG00000013810.17	-0.00579762	0.371561
ENSG00000014123.9	0.00832984	0.672635
ENSG00000014164.6	-0.0100327	0.500993
ENSG00000015133.17	-0.0101774	0.133887
ENSG00000015153.13	0.0103112	0.879675
ENSG00000015479.16	-0.109651	0.569628
ENSG00000016082.13	3.65757e-05	0.999512
ENSG00000016391.9	-0.0137636	0.701926
ENSG00000018189.11	-0.00319694	0.89333
ENSG00000018510.11	0.00728846	0.405074
ENSG00000018869.15	-0.204688	0.579409
ENSG00000020129.14	0.00127264	0.921507
ENSG00000020922.11	0.012477	0.528258
ENSG00000021826.13	0.00352441	0.894991
ENSG00000021852.11	-0.749937	0.722063
ENSG00000022840.14	-0.00543233	0.227877
ENSG00000023041.10	0.0042371	0.862496
ENSG00000023228.12	0.00642364	0.422186
ENSG00000023318.7	0.00437926	0.450555
ENSG00000023734.9	0.000597333	0.894254
ENSG00000024526.15	-0.0036895	0.876107
ENSG00000024862.15	1.93392e-05	0.999577
ENSG00000025423.10	-0.302857	0.0637167
ENSG00000025434.17	0.0361534	0.0501394
ENSG00000025770.17	-0.00563879	0.445335
ENSG00000025796.12	0.00552303	0.511045
ENSG00000026103.18	0.00968637	0.368133
ENSG00000026508.15	0.000107686	0.754832
ENSG00000027001.8	0.0135303	0.69163
ENSG00000028203.16	0.00174021	0.848192
ENSG00000028310.16	-0.00978352	0.39876
ENSG00000028528.13	-0.0104969	0.279411
ENSG00000029364.10	-0.00998276	0.151483
ENSG00000030419.15	0.0068991	0.633613
ENSG00000031691.6	-0.0245026	0.60786
ENSG00000031823.13	-0.00345729	0.81593
ENSG00000032219.17	0.00346551	0.917243
ENSG00000032742.16	0.0728962	0.401634
ENSG00000033011.10	-0.0149416	0.595412
ENSG00000033030.12	-0.0285288	0.337188
ENSG00000033178.11	-0.000401439	0.918381
ENSG00000034533.10	-0.018177	0.732725
ENSG00000034693.13	0.025157	0.44877
ENSG00000036672.14	0.00470608	0.709938
ENSG00000037241.6	0.010204	0.645808
ENSG00000037474.13	0.00109216	0.82573
ENSG00000037637.9	-0.0185728	0.382977
ENSG00000037749.10	0.00279896	0.889015
ENSG00000037897.15	-0.030726	0.232231
ENSG00000038219.11	0.00569397	0.523248
ENSG00000039123.14	0.00712517	0.472104
ENSG00000039600.9	-0.0547942	0.618181
ENSG00000039650.8	-0.0208724	0.253397
ENSG00000040487.11	-0.0240544	0.45494
ENSG00000040531.13	-0.0441119	0.140257
ENSG00000041880.13	0.00397185	0.782613
ENSG00000042088.12	-0.0413216	0.22941
ENSG00000042429.9	0.00891007	0.551708
ENSG00000042445.12	-0.00661869	0.413959
ENSG00000042493.14	-0.00244001	0.215351
ENSG00000044574.7	0.000386296	0.521392
ENSG00000046604.11	-0.000352019	0.849633
ENSG00000046651.13	-0.00644914	0.705552
ENSG00000047056.13	0.0260592	0.223934
ENSG00000047365.10	-0.0066584	0.335502
ENSG00000047410.12	-0.00298819	0.54073
ENSG00000047578.11	-0.0230753	0.422317
ENSG00000047621.10	0.0241281	0.394365
ENSG00000048162.18	-0.00319015	0.800082
ENSG00000048392.10	0.00493862	0.691843
ENSG00000048471.12	-0.0102823	0.223891
ENSG00000048649.12	-0.00241965	0.841891
ENSG00000048991.15	-0.0137235	0.444893
ENSG00000049130.12	0.00309049	0.607031
ENSG00000049167.12	0.110994	0.206303
ENSG00000049618.20	-0.00921017	0.243145
ENSG00000049883.13	0.0606191	0.300592
ENSG00000050130.16	0.0117349	0.364774
ENSG00000050327.13	-0.00463684	0.720535
ENSG00000051009.9	0.00732699	0.74724
ENSG00000051128.17	-0.00583594	0.26634
ENSG00000051180.15	0.00305205	0.894928
ENSG00000051620.9	-0.00151899	0.788891
ENSG00000052749.12	-0.000116663	0.986608
ENSG00000052841.13	0.0032268	0.808331
ENSG00000053371.11	-0.0216259	0.28029
ENSG00000053372.4	-0.00734409	0.388281
ENSG00000053770.10	-0.0143524	0.394708
ENSG00000054116.10	-0.000331838	0.970766
ENSG00000054267.19	0.00406982	0.81847
ENSG00000054282.14	-0.0135811	0.672509
ENSG00000054611.12	-0.0164067	0.276296
ENSG00000054690.12	-0.0770367	0.0842197
ENSG00000055070.15	-0.00336209	0.539504
ENSG00000055130.14	0.000639984	0.944147
ENSG00000055147.16	0.0295211	0.416737
ENSG00000055163.17	0.0134094	0.332776
ENSG00000055609.16	-0.00485421	0.457932
ENSG00000055950.15	0.00115112	0.933036
ENSG00000056736.8	-0.0316981	0.633348
ENSG00000057019.14	0.00159375	0.589118
ENSG00000057757.8	-0.0270825	0.0346981
ENSG00000057935.12	-0.0159169	0.468793
ENSG00000058063.14	-0.00155061	0.609892
ENSG00000058272.14	0.00174204	0.863949
ENSG00000059377.14	0.063033	9.55822e-05
ENSG00000059769.18	0.0236821	0.698133
ENSG00000060069.15	0.0113721	0.486676
ENSG00000060491.15	0.00137746	0.790553
ENSG00000060688.11	-0.0121356	0.492793
ENSG00000060762.17	0.0206699	0.350138
ENSG00000060982.13	0.00630183	0.0311244
ENSG00000061794.11	0.00635375	0.570168
ENSG00000061938.15	-0.0113414	0.143156
ENSG00000062485.17	-0.00236535	0.565874
ENSG00000062650.16	0.0128739	0.292673
ENSG00000062716.9	0.00291545	0.243188
ENSG00000062725.8	-0.0319094	0.170709
ENSG00000063169.9	-0.0917371	0.0409427
ENSG00000063176.14	-0.0131572	0.803943
ENSG00000063177.11	-0.000618496	0.308129
ENSG00000063245.13	-0.00356129	0.2184
ENSG00000063322.12	-0.0284245	0.0699117
ENSG00000063854.11	-0.00621889	0.751733
ENSG00000064102.13	0.000811703	0.959125
ENSG00000064225.11	0.0484623	0.258767
ENSG00000064393.14	-0.00265531	0.586721
ENSG00000064419.12	-0.00580912	0.506313
ENSG00000064489.20	-0.40605	0.445218
ENSG00000064490.12	-0.00790002	0.442132
ENSG00000064607.15	-0.0180855	0.344074
ENSG00000064651.12	-0.0208173	0.110306
ENSG00000064692.17	-0.0453351	0.310308
ENSG00000064703.10	0.00626883	0.857175
ENSG00000064726.8	0.00196899	0.87161
ENSG00000064763.9	0.0292076	0.421399
ENSG00000064933.15	0.0285762	0.561179
ENSG00000065000.14	0.000796513	0.831869
ENSG00000065057.6	-0.0218624	0.381414
ENSG00000065183.14	0.00255878	0.781928
ENSG00000065243.17	-0.00826473	0.479246
ENSG00000065308.4	-0.000695481	0.877085
ENSG00000065325.11	-0.0702324	0.766582
ENSG00000065413.15	0.0340011	0.237861
ENSG00000065427.13	0.000496399	0.893105
ENSG00000065491.8	-0.0153205	0.634346
ENSG00000065526.9	-0.00332247	0.44173
ENSG00000065559.13	-0.0154306	0.233994
ENSG00000065621.13	-0.012932	0.518243
ENSG00000065675.13	0.0831567	2.81708e-05
ENSG00000065883.13	-0.013639	0.251338
ENSG00000065911.10	0.00465973	0.427061
ENSG00000066044.12	-0.0161866	0.200628
ENSG00000066136.18	-0.020341	0.264758
ENSG00000066185.11	0.224015	0.243813
ENSG00000066230.9	0.00517398	0.889921
ENSG00000066248.13	-0.0268645	0.163654
ENSG00000066557.5	0.0453492	0.262709
ENSG00000066735.13	-0.042588	0.217403
ENSG00000066739.10	-0.0100961	0.523698
ENSG00000066777.7	0.00304448	0.678166
ENSG00000066923.16	-0.0103087	0.437335
ENSG00000067057.15	0.00129452	0.546577
ENSG00000067064.9	0.0111487	0.12493
ENSG00000067167.6	0.00159144	0.478762
ENSG00000067221.12	-0.0162182	0.442746
ENSG00000067248.8	0.0134886	0.240315
ENSG00000067369.12	-0.0010957	0.947305
ENSG00000067560.9	0.00138996	0.29252
ENSG00000067601.7	0.217626	0.662186
ENSG00000067606.14	-0.0180206	0.415082
ENSG00000067646.10	-0.0529595	0.0565114
ENSG00000068024.15	-0.00611597	0.668843
ENSG00000068028.16	0.01099	0.53299
ENSG00000068097.13	-0.104636	0.0219114
ENSG00000068489.11	0.00726901	0.593205
ENSG00000068650.17	-0.00583042	0.500174
ENSG00000068654.14	-0.00843067	0.283073
ENSG00000068697.6	0.00164699	0.434535
ENSG00000068878.13	-0.012263	0.0672774
ENSG00000068885.13	0.00241301	0.944093
ENSG00000068903.18	-0.00389712	0.745144
ENSG00000068912.12	0.00609709	0.606021
ENSG00000068971.12	0.00240718	0.831013
ENSG00000069011.14	-0.000832146	0.568625
ENSG00000069248.11	0.00314761	0.831775
ENSG00000069329.14	0.00108776	0.848245
ENSG00000069345.10	-0.00361681	0.712548
ENSG00000069812.10	-0.00155688	0.52182
ENSG00000069943.8	0.168399	0.0732025
ENSG00000069974.14	0.0174488	0.288186
ENSG00000070010.17	-0.00803572	0.27031
ENSG00000070061.13	-0.00856282	0.338804
ENSG00000070081.14	0.00340371	0.722817
ENSG00000070087.12	0.000966308	0.607112
ENSG00000070193.4	0.111803	0.618505
ENSG00000070366.12	-0.0184363	0.309622
ENSG00000070367.14	-0.00851654	0.251064
ENSG00000070413.17	-0.00902054	0.0389621
ENSG00000070423.16	-0.00696192	0.464017
ENSG00000070495.13	-0.0113006	0.592891
ENSG00000070610.13	-0.00984764	0.290966
ENSG00000070614.13	0.000234511	0.911523
ENSG00000070718.10	0.00262262	0.866785
ENSG00000070761.6	0.00108246	0.972825
ENSG00000070770.7	-0.00656898	0.464782
ENSG00000070961.13	0.0018892	0.754075
ENSG00000071082.9	-3.77811e-05	0.954806
ENSG00000071189.20	0.00562723	0.750869
ENSG00000071246.9	0.0268089	0.0288713
ENSG00000071462.10	-0.00317229	0.695855
ENSG00000071539.12	0.00782154	0.407091
ENSG00000071553.15	-0.00102206	0.771615
ENSG00000071794.14	0.000640104	0.908275
ENSG00000071894.13	-0.0039141	0.538927
ENSG00000072110.12	-0.000314777	0.510548
ENSG00000072364.11	0.00190762	0.684795
ENSG00000072501.16	-0.00115714	0.740749
ENSG00000072571.18	0.00871764	0.663213
ENSG00000072682.17	0.000900409	0.68951
ENSG00000072756.15	0.0387321	0.456329
ENSG00000072849.9	-0.0106221	0.497243
ENSG00000072864.11	-0.0139488	0.10676
ENSG00000072954.5	0.0394232	0.000778405
ENSG00000073111.12	-0.00154168	0.539865
ENSG00000073169.12	-0.0291835	0.165491
ENSG00000073331.16	-0.00965426	0.717221
ENSG00000073578.15	0.00120984	0.733596
ENSG00000073584.17	0.0141336	0.445199
ENSG00000073598.5	-1.03321	0.788262
ENSG00000073614.10	-0.00684795	0.397668
ENSG00000073756.10	-0.00142373	0.464587
ENSG00000073803.12	-0.01352	0.190633
ENSG00000073910.18	0.0789645	0.0148921
ENSG00000074054.16	0.00132603	0.861644
ENSG00000074071.12	-0.00958692	0.179355
ENSG00000074219.12	-0.0249052	0.0960445
ENSG00000074317.9	-0.0431683	0.862819
ENSG00000074582.11	0.0216276	0.430464
ENSG00000074621.12	-0.0227464	0.710387
ENSG00000074695.5	0.00155885	0.594134
ENSG00000074755.13	-0.00977274	0.334666
ENSG00000074800.12	-0.000175517	0.416609
ENSG00000074803.16	2.08545	0.578269
ENSG00000074855.9	-0.00296791	0.923267
ENSG00000074935.12	0.0317721	0.693555
ENSG00000075089.8	0.0212302	0.332464
ENSG00000075131.8	-0.0412354	0.46937
ENSG00000075188.7	0.00839479	0.608162
ENSG00000075218.17	-0.0194987	0.376487
ENSG00000075239.12	0.0272964	0.00492343
ENSG00000075303.11	-0.00140419	0.945139
ENSG00000075336.10	0.0165247	0.606868
ENSG00000075391.15	0.00949429	0.421081
ENSG00000075399.11	-0.0213927	0.279965
ENSG00000075643.5	-0.0221838	0.113631
ENSG00000075702.15	-0.0193462	0.359793
ENSG00000075790.9	0.00116986	0.848923
ENSG00000075914.11	0.00148835	0.922103
ENSG00000076053.9	0.0677695	0.0164338
ENSG00000076201.13	-0.00197433	0.813628
ENSG00000076242.13	0.0250349	0.253567
ENSG00000076382.15	-0.00369466	0.749048
ENSG00000076513.15	-0.0128482	0.182135
ENSG00000076604.13	-0.00143646	0.781193
ENSG00000076924.10	-0.00829385	0.447522
ENSG00000076944.13	0.000708651	0.930361
ENSG00000076984.16	-0.017613	0.405311
ENSG00000077235.16	-0.00689626	0.11496
ENSG00000077238.12	-0.0013407	0.649381
ENSG00000077312.7	-0.00726183	0.434837
ENSG00000077348.7	-0.026637	0.251863
ENSG00000077458.11	0.0286041	0.394503
ENSG00000077463.13	-0.00789004	0.713425
ENSG00000077514.7	-0.00432697	0.840839
ENSG00000077800.10	-1.65169	0.438161
ENSG00000077935.15	-0.0280161	0.437229
ENSG00000078114.17	0.00283303	0.564504
ENSG00000078177.12	-0.0288993	0.33172
ENSG00000078246.14	-0.0207311	0.324855
ENSG00000078369.16	-0.000849218	0.639901
ENSG00000078487.16	-0.0837007	0.284231
ENSG00000078808.15	-0.00195916	0.619928
ENSG00000078900.13	-0.0102251	0.276461
ENSG00000078902.14	-0.00047658	0.876406
ENSG00000078967.11	0.0225168	0.58215
ENSG00000079134.10	-0.00112108	0.9617
ENSG00000079739.14	0.000817134	0.915153
ENSG00000080007.7	-0.0129741	0.848306
ENSG00000080189.13	0.00285182	0.740965
ENSG00000080298.14	0.0248512	0.560984
ENSG00000080546.12	0.0144012	0.655283
ENSG00000080603.15	-0.0101635	0.0259988
ENSG00000080822.15	-0.00298932	0.661279
ENSG00000080824.17	-0.00059949	0.200277
ENSG00000080839.10	-0.0155448	0.448739
ENSG00000080986.11	-0.010364	0.449511
ENSG00000081014.9	-0.0108807	0.59361
ENSG00000081019.12	0.00934432	0.793569
ENSG00000081052.11	0.00593243	0.505543
ENSG00000081087.13	0.0142229	0.156775
ENSG00000081870.10	0.00892179	0.67099
ENSG00000082213.16	-0.0128479	0.59083
ENSG00000082258.11	0.00211031	0.916842
ENSG00000082641.14	0.000249073	0.806144
ENSG00000082701.13	-0.00775396	0.241603
ENSG00000082805.18	-0.00545471	0.268278
ENSG00000083093.8	-0.026803	0.34791
ENSG00000083290.18	-0.0193424	0.337997
ENSG00000083307.9	-0.00734656	0.301136
ENSG00000083312.16	0.0120414	0.0232131
ENSG00000083520.13	-0.0137102	0.212847
ENSG00000083535.14	-0.00973355	0.713626
ENSG00000083635.7	0.0761933	0.195344
ENSG00000083720.11	-0.00780796	0.587723
ENSG00000083799.16	0.00404372	0.592302
ENSG00000083817.8	-0.0779577	0.291501
ENSG00000083937.7	-0.00181402	0.907392
ENSG00000084072.15	-0.00975391	0.438441
ENSG00000084073.7	0.00627412	0.377287
ENSG00000084090.12	0.00150957	0.64912
ENSG00000084110.9	-0.00228599	0.870493
ENSG00000084463.6	-0.00161071	0.823826
ENSG00000084623.10	-0.00223842	0.364197
ENSG00000085231.12	0.0398091	0.253804
ENSG00000085365.16	0.0173311	0.0241583
ENSG00000085382.10	0.05054	0.365628
ENSG00000085491.14	0.00871201	0.427561
ENSG00000085511.18	-0.00782592	0.547764
ENSG00000085721.11	-0.00735555	0.75017
ENSG00000085733.14	-4.44119e-05	0.883074
ENSG00000085840.11	-0.0282399	0.288083
ENSG00000085872.13	-0.0303514	0.0697594
ENSG00000086061.14	0.00106623	0.536756
ENSG00000086062.11	0.000288847	0.808427
ENSG00000086065.12	0.00300598	0.47668
ENSG00000086189.8	0.0434713	0.0335772
ENSG00000086200.15	0.0164698	0.495845
ENSG00000086598.9	-0.00072608	0.734299
ENSG00000087206.15	0.00391804	0.902884
ENSG00000087258.12	0.030963	0.329526
ENSG00000087263.15	0.000533541	0.972715
ENSG00000087269.14	-0.00555043	0.598597
ENSG00000087299.10	-0.0403084	0.304128
ENSG00000087301.7	-0.0216453	0.585032
ENSG00000087586.16	0.00278099	0.804744
ENSG00000087884.13	-0.012793	0.600758
ENSG00000088448.13	0.00908982	0.253204
ENSG00000088682.12	-0.0098112	0.512748
ENSG00000088727.11	0.0288839	0.696014
ENSG00000088756.11	-0.0081753	0.685237
ENSG00000088766.10	0.0225161	0.0647281
ENSG00000088808.15	-0.0388592	0.0227991
ENSG00000088836.11	-0.0183379	0.245248
ENSG00000088930.7	0.000564205	0.893703
ENSG00000088986.9	-0.000739054	0.580137
ENSG00000088992.16	0.0197849	0.290481
ENSG00000089006.15	-0.000243001	0.969398
ENSG00000089009.14	-0.00021417	0.762345
ENSG00000089022.12	-0.0373433	0.247005
ENSG00000089048.13	0.0112584	0.397383
ENSG00000089053.11	-0.00609178	0.390626
ENSG00000089060.10	-0.0198152	0.146318
ENSG00000089091.15	0.00760021	0.949277
ENSG00000089094.15	-0.0216539	0.198924
ENSG00000089116.3	-0.0414031	0.649834
ENSG00000089157.14	-0.000181622	0.534139
ENSG00000089195.13	0.00656569	0.7097
ENSG00000089220.4	0.00222984	0.368037
ENSG00000089225.18	-0.00989433	0.842266
ENSG00000089234.14	-0.0660309	0.0928495
ENSG00000089248.6	-0.00183383	0.677609
ENSG00000089250.17	0.0065737	0.747543
ENSG00000089335.19	0.0139726	0.724803
ENSG00000089505.16	-0.0710352	0.864188
ENSG00000089737.14	-0.013443	0.0255526
ENSG00000089818.15	0.0150934	0.499153
ENSG00000089847.11	-0.431959	0.372045
ENSG00000089876.10	-0.00889592	0.457946
ENSG00000090013.8	-0.001486	0.819438
ENSG00000090060.16	-0.00326857	0.487643
ENSG00000090061.16	-0.0194651	0.531178
ENSG00000090238.10	-0.00810451	0.468481
ENSG00000090273.12	-0.00292557	0.428151
ENSG00000090372.13	-0.0163712	0.0928186
ENSG00000090581.8	-0.00317043	0.713715
ENSG00000090861.14	-0.00124679	0.76559
ENSG00000090889.11	-0.00614172	0.612585
ENSG00000091157.12	0.0132574	0.614299
ENSG00000091164.11	0.00902579	0.360807
ENSG00000091181.18	0.306101	0.387249
ENSG00000091262.13	-0.0530559	0.734157
ENSG00000091428.16	0.022399	0.697057
ENSG00000091640.6	-0.00593663	0.558641
ENSG00000091651.7	-0.00207555	0.939688
ENSG00000092020.9	0.0646321	0.125018
ENSG00000092094.9	-0.0510242	0.120994
ENSG00000092098.15	-0.00553441	0.803338
ENSG00000092201.8	-0.00408917	0.311839
ENSG00000092203.12	-0.00596832	0.394359
ENSG00000092421.15	-0.00462121	0.733086
ENSG00000092531.8	0.00487586	0.786396
ENSG00000092841.17	-0.000200841	0.669225
ENSG00000092964.15	0.000662467	0.895103
ENSG00000092969.10	0.0160449	0.124819
ENSG00000092978.9	-0.0574407	0.220304
ENSG00000093000.17	-0.0077132	0.253272
ENSG00000093009.8	-0.00135786	0.916455
ENSG00000093010.10	-0.00652556	0.0931311
ENSG00000093183.12	0.0284569	0.202247
ENSG00000094916.12	-0.0040801	0.232842
ENSG00000095139.12	-0.000391764	0.835462
ENSG00000095319.13	-0.00125282	0.80134
ENSG00000095321.15	-0.00191256	0.808757
ENSG00000095574.10	0.022025	0.609267
ENSG00000095777.13	-0.0194239	0.492136
ENSG00000095787.20	0.000100195	0.98647
ENSG00000095794.18	0.0305913	0.0596829
ENSG00000096070.18	-0.0121939	0.387385
ENSG00000096696.12	-6.66994e-05	0.359157
ENSG00000096872.14	0.0442822	0.202708
ENSG00000097021.18	-0.00295069	0.512558
ENSG00000097033.13	0.00420382	0.471155
ENSG00000099194.5	-0.000165184	0.789046
ENSG00000099203.5	-0.0255526	0.604474
ENSG00000099256.17	-0.039006	0.419397
ENSG00000099290.14	0.00699843	0.775817
ENSG00000099326.7	-0.0551927	0.213161
ENSG00000099331.12	-0.00786891	0.25223
ENSG00000099364.15	-0.0244363	0.107256
ENSG00000099381.15	-0.0460503	0.0193042
ENSG00000099625.11	0.00764621	0.95211
ENSG00000099783.10	-0.00237925	0.412335
ENSG00000099840.12	-0.0492928	0.642043
ENSG00000099849.13	0.0020427	0.814
ENSG00000099889.12	-0.0500649	0.0795259
ENSG00000099910.15	-0.0717396	0.0378577
ENSG00000099917.16	-0.0118751	0.0190028
ENSG00000099940.10	-0.0288942	0.0970754
ENSG00000099953.8	0.00164873	0.190601
ENSG00000099968.16	-0.0079969	0.320959
ENSG00000099977.12	-0.00770971	0.595444
ENSG00000099984.9	0.278084	0.921103
ENSG00000099995.17	-0.00571448	0.232337
ENSG00000100014.18	-0.0159815	0.445878
ENSG00000100024.13	-0.00107856	0.983356
ENSG00000100028.10	-0.0042275	0.422178
ENSG00000100029.16	-0.00439973	0.261559
ENSG00000100077.13	0.00628811	0.715178
ENSG00000100084.13	-0.0599775	0.090467
ENSG00000100099.19	-0.0107848	0.513233
ENSG00000100100.11	-0.00601706	0.510589
ENSG00000100104.11	-0.0253627	0.380543
ENSG00000100105.16	-0.022829	0.206898
ENSG00000100109.15	-0.0176058	0.274373
ENSG00000100124.11	-0.0486571	0.110832
ENSG00000100129.16	7.6535e-05	0.98072
ENSG00000100209.8	-0.0373183	0.452816
ENSG00000100211.9	-0.0312601	0.337286
ENSG00000100216.5	-0.00316588	0.611
ENSG00000100218.10	-0.116787	0.804232
ENSG00000100227.16	-0.0112833	0.153218
ENSG00000100228.11	-0.0095672	0.766525
ENSG00000100258.16	-0.00646079	0.192716
ENSG00000100263.12	-0.0245884	0.253425
ENSG00000100284.19	-0.00547672	0.270891
ENSG00000100288.18	-0.0613318	0.507886
ENSG00000100312.9	-1.67944	0.36116
ENSG00000100314.3	0.128739	0.485579
ENSG00000100319.12	-0.0556189	0.0880664
ENSG00000100345.19	-0.000162896	0.395637
ENSG00000100354.19	-0.0174182	0.203725
ENSG00000100380.11	0.000714322	0.832255
ENSG00000100410.6	-0.0189819	0.346306
ENSG00000100412.14	0.000644781	0.917203
ENSG00000100418.7	-0.00639118	0.510851
ENSG00000100439.9	0.00779465	0.295538
ENSG00000100442.9	0.000981552	0.9244
ENSG00000100461.16	-0.00774671	0.497643
ENSG00000100462.14	-0.00253441	0.747818
ENSG00000100523.13	-0.0144869	0.574856
ENSG00000100554.10	-0.00538552	0.273017
ENSG00000100575.12	-0.0232922	0.335315
ENSG00000100577.17	-0.0228847	0.195448
ENSG00000100578.13	-0.0157895	0.64805
ENSG00000100580.7	-0.0143809	0.524417
ENSG00000100583.4	-0.191799	0.590327
ENSG00000100591.6	-0.00477727	0.321611
ENSG00000100601.8	-0.0915935	0.239769
ENSG00000100603.12	-0.0092578	0.315447
ENSG00000100632.9	-0.00420286	0.401042
ENSG00000100644.15	-0.00100085	0.305691
ENSG00000100697.13	-0.0103214	0.108492
ENSG00000100711.12	-0.0161789	0.254671
ENSG00000100731.14	-0.00556124	0.490358
ENSG00000100744.13	-0.0178016	0.287346
ENSG00000100784.8	-0.0334568	0.272933
ENSG00000100811.9	-0.0142509	0.0506626
ENSG00000100813.13	-0.00660889	0.329553
ENSG00000100823.10	-0.00173056	0.721563
ENSG00000100852.11	-0.0067217	0.142252
ENSG00000100865.13	-0.021207	0.237322
ENSG00000100883.10	0.00616247	0.60083
ENSG00000100890.14	-0.0665404	0.596907
ENSG00000100897.16	-0.00486489	0.677143
ENSG00000100911.12	6.54007e-06	0.99605
ENSG00000100916.12	0.0357966	0.416146
ENSG00000100938.16	-0.0166372	0.283533
ENSG00000100941.7	-0.000986396	0.890195
ENSG00000101076.15	-0.0581413	0.727387
ENSG00000101079.19	0.00357006	0.761703
ENSG00000101109.10	0.00703539	0.562495
ENSG00000101126.14	-0.00724568	0.262422
ENSG00000101138.10	-0.0183017	0.488456
ENSG00000101144.11	-0.00515896	0.352957
ENSG00000101150.16	-0.00203388	0.41618
ENSG00000101182.13	3.49837e-06	0.998326
ENSG00000101187.14	-0.00578132	0.675783
ENSG00000101191.15	-0.00757667	0.459519
ENSG00000101193.7	-0.00778012	0.19007
ENSG00000101198.13	-0.409528	0.389836
ENSG00000101199.11	-0.0029011	0.524897
ENSG00000101216.9	-0.053701	0.0565336
ENSG00000101224.16	0.000445092	0.764915
ENSG00000101246.18	-0.00225091	0.727455
ENSG00000101247.16	0.0264664	0.500863
ENSG00000101290.12	0.0117309	0.248044
ENSG00000101346.10	-0.00497545	0.390483
ENSG00000101365.19	0.000509897	0.935803
ENSG00000101407.11	-0.0084259	0.646863
ENSG00000101413.10	-0.0110402	0.431718
ENSG00000101421.3	-0.0039214	0.193653
ENSG00000101425.11	1.45733	0.0701918
ENSG00000101452.13	-0.0248215	0.463024
ENSG00000101457.11	0.00869955	0.607114
ENSG00000101470.8	0.00331729	0.00262288
ENSG00000101473.15	-0.00139389	0.956456
ENSG00000101493.9	0.0124199	0.505506
ENSG00000101546.11	0.00511739	0.820351
ENSG00000101574.13	-0.0286033	0.420507
ENSG00000101596.13	-0.00332466	0.641266
ENSG00000101608.11	0.00121266	0.311267
ENSG00000101639.17	0.00137993	0.923896
ENSG00000101654.16	-0.00547948	0.592168
ENSG00000101745.14	-0.00448629	0.726093
ENSG00000101746.14	-0.333963	0.651868
ENSG00000101751.9	0.0873158	0.102171
ENSG00000101752.10	-0.00615193	0.40907
ENSG00000101843.17	-0.00565302	0.714567
ENSG00000101844.16	-0.00568527	0.888947
ENSG00000101850.11	0.027492	0.472203
ENSG00000101955.13	0.00576164	0.152315
ENSG00000101986.11	-0.00318711	0.814516
ENSG00000101997.11	-0.0163966	0.526201
ENSG00000102081.12	-0.0127853	0.275765
ENSG00000102103.14	-0.0110522	0.31946
ENSG00000102125.14	-0.0151139	0.465753
ENSG00000102312.19	0.0152645	0.0492153
ENSG00000102317.16	0.000931895	0.580221
ENSG00000102393.8	0.0315333	0.016142
ENSG00000102471.12	0.00377214	0.092787
ENSG00000102531.15	0.020368	0.0713493
ENSG00000102547.17	0.0754656	0.0309932
ENSG00000102572.13	-0.000381405	0.920137
ENSG00000102580.13	0.00123837	0.852078
ENSG00000102753.8	0.00626096	0.519239
ENSG00000102755.9	-0.00419229	0.661343
ENSG00000102786.13	-0.0034629	0.814822
ENSG00000102796.9	0.0118633	0.853456
ENSG00000102871.14	-0.0109835	0.52106
ENSG00000102897.8	-0.0188996	0.566681
ENSG00000102900.11	-0.0048444	0.684803
ENSG00000102904.13	-0.0917525	0.764333
ENSG00000102921.6	-0.00266056	0.527587
ENSG00000102974.13	-0.00887789	0.504044
ENSG00000102977.12	-0.0115577	0.619101
ENSG00000102981.8	0.0257975	0.800985
ENSG00000103005.10	-0.00461662	0.396842
ENSG00000103035.9	-0.00326965	0.678698
ENSG00000103051.17	-0.0218042	0.0504731
ENSG00000103061.10	-0.138359	0.281475
ENSG00000103145.9	-0.00838782	0.284105
ENSG00000103152.10	-0.00128272	0.939464
ENSG00000103160.10	0.0266482	0.3427
ENSG00000103174.10	-0.0237281	0.55724
ENSG00000103197.15	-0.00649458	0.388241
ENSG00000103227.17	-0.0181687	0.584293
ENSG00000103248.16	-0.0353675	0.430106
ENSG00000103253.16	-0.0445165	0.414927
ENSG00000103266.9	-0.0168254	0.220128
ENSG00000103275.17	-0.0215152	0.0249161
ENSG00000103326.9	-0.0222302	0.0536642
ENSG00000103343.11	-0.143848	0.134991
ENSG00000103353.14	0.00196244	0.875937
ENSG00000103356.14	-0.0186163	0.394598
ENSG00000103363.13	-0.00300739	0.295049
ENSG00000103423.12	-0.0158664	0.217616
ENSG00000103429.9	-0.0089707	0.489512
ENSG00000103494.11	-0.00820909	0.897965
ENSG00000103502.12	-0.00427352	0.589794
ENSG00000103549.20	-0.0134535	0.112571
ENSG00000103591.11	-0.0090651	0.388475
ENSG00000103599.18	0.0430737	0.198583
ENSG00000103671.8	-0.00158017	0.939603
ENSG00000103710.9	0.0209242	0.699612
ENSG00000103852.11	-0.0567485	0.138195
ENSG00000103942.11	-0.00430475	0.511769
ENSG00000103966.8	-0.00425942	0.347873
ENSG00000103978.14	-2.72742e-05	0.996505
ENSG00000103994.15	0.00687534	0.0250989
ENSG00000103995.12	0.0139637	0.784429
ENSG00000104043.13	0.235639	0.0178932
ENSG00000104047.13	0.0106664	0.817403
ENSG00000104064.15	-0.0302494	0.312296
ENSG00000104129.8	-0.0287762	0.405055
ENSG00000104131.11	0.000792194	0.925976
ENSG00000104140.6	-0.00405077	0.213837
ENSG00000104147.7	-0.0231037	0.735045
ENSG00000104164.9	0.0156104	0.157817
ENSG00000104228.11	-0.0143095	0.394822
ENSG00000104231.9	0.0308137	0.182844
ENSG00000104299.13	0.000496058	0.985169
ENSG00000104312.7	0.00715318	0.533116
ENSG00000104356.9	-0.0140071	0.589172
ENSG00000104365.12	-0.000225997	0.982192
ENSG00000104369.4	0.0228104	0.24219
ENSG00000104375.14	-0.0160301	0.354645
ENSG00000104381.11	0.00751121	0.735224
ENSG00000104388.13	0.00769081	0.0742513
ENSG00000104490.16	-0.0178116	0.260228
ENSG00000104549.10	0.00286439	0.274207
ENSG00000104643.8	-0.00294276	0.938101
ENSG00000104671.6	0.0172347	0.454141
ENSG00000104689.8	-0.00639842	0.69573
ENSG00000104714.12	0.0406192	0.32078
ENSG00000104722.12	0.00285827	0.511488
ENSG00000104738.15	-0.00157289	0.499563
ENSG00000104756.14	0.00100159	0.927371
ENSG00000104763.16	0.0117247	0.0237351
ENSG00000104765.13	-0.00230578	0.590966
ENSG00000104774.11	0.00895148	0.118621
ENSG00000104812.13	0.00550364	0.342854
ENSG00000104814.11	0.0253886	0.345863
ENSG00000104825.15	-0.0319947	0.157447
ENSG00000104835.13	-0.23737	0.0364959
ENSG00000104853.14	-0.00238967	0.635104
ENSG00000104872.9	-0.00478507	0.618043
ENSG00000104880.16	0.0255033	0.665102
ENSG00000104881.13	-0.00561785	0.105129
ENSG00000104885.16	-0.00603571	0.620846
ENSG00000104892.15	-0.0052908	0.584717
ENSG00000104897.8	-0.00405799	0.53002
ENSG00000104901.5	-2.94318	0.0425699
ENSG00000104904.11	0.000292592	0.739785
ENSG00000104907.11	-0.007375	0.562611
ENSG00000104915.13	-0.00444909	0.74948
ENSG00000104946.9	-0.0152789	0.348739
ENSG00000104951.14	0.0113957	0.376953
ENSG00000104960.14	-0.00640436	0.279208
ENSG00000104973.13	-0.0128289	0.417841
ENSG00000104979.7	-0.0038435	0.524082
ENSG00000104998.3	-0.0069329	0.445397
ENSG00000105011.7	-0.0118887	0.285868
ENSG00000105053.9	-0.0202911	0.536905
ENSG00000105072.7	-0.123604	0.301567
ENSG00000105127.7	-0.0351857	0.163955
ENSG00000105193.7	-0.000664965	0.338923
ENSG00000105220.13	-0.00141929	0.240713
ENSG00000105223.17	-0.000362484	0.841318
ENSG00000105248.14	-0.00399737	0.837542
ENSG00000105281.11	0.000708175	0.70631
ENSG00000105376.4	0.0312198	0.538222
ENSG00000105392.14	-0.989429	0.55628
ENSG00000105443.12	-0.0139243	0.285712
ENSG00000105467.7	0.0822794	0.295869
ENSG00000105479.14	0.00516506	0.986801
ENSG00000105483.15	0.0454231	0.124208
ENSG00000105486.12	-0.0073142	0.383277
ENSG00000105516.9	-0.00105257	0.95626
ENSG00000105550.7	-1.46023	0.522149
ENSG00000105612.7	0.0119988	0.207707
ENSG00000105618.12	-0.00508659	0.54223
ENSG00000105619.12	-0.0138039	0.56028
ENSG00000105641.3	-0.225274	0.250408
ENSG00000105649.8	-0.147343	0.49564
ENSG00000105669.11	-0.00290598	0.488242
ENSG00000105671.10	-0.0106062	0.333062
ENSG00000105676.12	-0.0137887	0.428024
ENSG00000105677.10	-0.00750991	0.377689
ENSG00000105696.7	-0.0624064	0.733782
ENSG00000105705.14	-0.0173023	0.544545
ENSG00000105723.10	-0.0391824	0.0182055
ENSG00000105738.9	-0.00767254	0.308591
ENSG00000105778.16	-0.00781603	0.581606
ENSG00000105810.8	-0.00300494	0.352504
ENSG00000105821.13	-0.00735439	0.564685
ENSG00000105825.10	-0.00225154	0.838562
ENSG00000105835.10	0.00130956	0.0716591
ENSG00000105879.10	-0.0190093	0.436965
ENSG00000105968.17	-0.00286537	0.587063
ENSG00000105971.13	0.00136806	0.544751
ENSG00000105982.15	-0.138142	0.540997
ENSG00000105991.7	0.103776	0.229856
ENSG00000106028.9	0.00440741	0.488066
ENSG00000106031.7	-0.103417	0.548012
ENSG00000106080.9	0.000804785	0.955111
ENSG00000106086.17	-0.0640087	0.151737
ENSG00000106105.12	-0.00143325	0.680161
ENSG00000106144.18	-0.00848232	0.444647
ENSG00000106244.11	-0.00350697	0.381571
ENSG00000106245.8	-0.00716786	0.463826
ENSG00000106263.16	-0.00135122	0.374968
ENSG00000106266.7	-0.0158511	0.24355
ENSG00000106268.14	-0.0062916	0.589858
ENSG00000106290.13	-0.0113052	0.47909
ENSG00000106299.7	-0.00280319	0.651078
ENSG00000106305.8	0.00766651	0.721268
ENSG00000106344.7	-0.0192795	0.291624
ENSG00000106355.8	-0.000382111	0.972035
ENSG00000106397.10	0.00129679	0.735841
ENSG00000106400.10	-0.00314201	0.540496
ENSG00000106459.13	-0.114563	0.10746
ENSG00000106524.7	-0.00437003	0.91884
ENSG00000106538.8	0.000982731	0.867917
ENSG00000106546.11	-0.000348268	0.870696
ENSG00000106554.10	0.0159892	0.390796
ENSG00000106565.16	0.0143998	0.00223186
ENSG00000106588.9	0.00731771	0.565015
ENSG00000106591.3	0.00325446	0.811643
ENSG00000106608.15	-0.0196832	0.20205
ENSG00000106610.13	0.139679	0.0314349
ENSG00000106617.12	0.0037522	0.906783
ENSG00000106692.12	0.0142153	0.626672
ENSG00000106733.19	0.0202626	0.238902
ENSG00000106803.8	0.000981137	0.868755
ENSG00000106993.10	0.0201377	0.227945
ENSG00000107099.14	0.00712818	0.326514
ENSG00000107175.9	-0.00592864	0.394763
ENSG00000107185.9	-0.00580924	0.302497
ENSG00000107262.15	0.00148077	0.712583
ENSG00000107282.6	-0.0032741	0.953733
ENSG00000107362.12	0.00588254	0.809265
ENSG00000107371.11	0.00296444	0.851828
ENSG00000107485.14	0.0163606	0.4005
ENSG00000107551.19	0.031574	0.010489
ENSG00000107560.9	0.14449	0.0156191
ENSG00000107651.11	0.00193534	0.868085
ENSG00000107669.16	-0.0112879	0.608969
ENSG00000107758.14	0.02938	0.044507
ENSG00000107779.10	0.0284252	0.34056
ENSG00000107796.11	-0.0018105	0.634179
ENSG00000107798.16	0.0088662	0.00615397
ENSG00000107807.11	0.0632841	0.208586
ENSG00000107815.6	-0.00886483	0.743512
ENSG00000107819.12	0.00352296	0.632347
ENSG00000107821.13	-0.0236206	0.630962
ENSG00000107854.5	0.00565016	0.428628
ENSG00000107864.13	0.0316428	0.512971
ENSG00000107897.17	0.013976	0.501122
ENSG00000107937.17	1.04753e-05	0.998861
ENSG00000107938.16	0.0444066	0.318053
ENSG00000107949.15	0.00619514	0.518486
ENSG00000107984.8	-0.0108319	0.415016
ENSG00000108061.10	0.0169661	0.313646
ENSG00000108107.11	-0.000406587	0.4093
ENSG00000108306.10	-0.0237569	0.503612
ENSG00000108312.13	-0.0234547	0.0132113
ENSG00000108342.11	-0.00234109	0.778728
ENSG00000108379.8	-0.00646035	0.819363
ENSG00000108384.13	-0.0232241	0.587534
ENSG00000108395.12	-0.0097049	0.695658
ENSG00000108423.13	0.0193796	0.680577
ENSG00000108424.8	-0.00151975	0.62591
ENSG00000108433.14	-0.035065	0.309089
ENSG00000108439.8	-0.0111245	0.646531
ENSG00000108443.12	0.012054	0.567498
ENSG00000108469.13	-0.0204762	0.385496
ENSG00000108474.15	-0.179615	0.055188
ENSG00000108509.19	-0.0190058	0.252255
ENSG00000108515.16	0.00496903	0.00189747
ENSG00000108518.7	-0.000335883	0.581495
ENSG00000108523.14	-0.00736676	0.290349
ENSG00000108528.12	-0.0115354	0.26839
ENSG00000108559.10	-0.00618119	0.663848
ENSG00000108590.9	0.00866971	0.908852
ENSG00000108641.13	-0.0338458	0.468363
ENSG00000108666.8	-0.0118373	0.791306
ENSG00000108733.8	-0.0284046	0.768208
ENSG00000108759.3	-0.342991	0.515329
ENSG00000108773.9	-0.0114954	0.251042
ENSG00000108774.13	0.00882336	0.374209
ENSG00000108798.7	0.0436974	0.00319515
ENSG00000108825.16	-1.40129	0.307632
ENSG00000108826.14	-0.00378972	0.604191
ENSG00000108828.14	-0.00118894	0.69215
ENSG00000108830.9	-0.162359	0.249709
ENSG00000108839.10	-0.0190823	0.301893
ENSG00000108883.11	-0.00154121	0.794313
ENSG00000109046.13	0.00109793	0.860511
ENSG00000109062.8	-0.001991	0.287749
ENSG00000109065.10	-0.0372736	0.153254
ENSG00000109066.12	-0.0263015	0.204207
ENSG00000109072.12	-0.0308249	0.921365
ENSG00000109079.8	-0.00160878	0.670475
ENSG00000109083.12	0.00975012	0.797863
ENSG00000109111.13	-0.00693532	0.252569
ENSG00000109113.16	-0.00177931	0.719979
ENSG00000109158.9	-0.280044	0.498498
ENSG00000109189.11	0.00134197	0.945801
ENSG00000109320.10	-0.00634406	0.286272
ENSG00000109332.18	-0.00086543	0.760843
ENSG00000109339.17	-0.0205242	0.510298
ENSG00000109436.7	-0.00105427	0.926167
ENSG00000109466.12	0.0256307	0.366464
ENSG00000109475.15	-0.000423369	0.664687
ENSG00000109534.15	-0.0226691	0.370434
ENSG00000109536.10	-0.0376391	0.169876
ENSG00000109572.12	-0.00362543	0.426086
ENSG00000109586.10	0.00189633	0.855674
ENSG00000109618.10	-0.00135257	0.977844
ENSG00000109670.12	-0.00579433	0.776734
ENSG00000109684.13	0.361664	0.25522
ENSG00000109736.13	0.00199604	0.561769
ENSG00000109771.14	0.306066	0.132514
ENSG00000109775.9	0.00288963	0.923404
ENSG00000109787.11	-0.00272505	0.492577
ENSG00000109805.8	0.00342108	0.7967
ENSG00000109814.10	-0.00166011	0.68022
ENSG00000109832.11	-0.124442	0.6584
ENSG00000109911.16	0.0148535	0.717818
ENSG00000110025.11	-0.495067	0.308874
ENSG00000110031.11	0.00968341	0.42045
ENSG00000110046.11	-0.00277663	0.781697
ENSG00000110048.10	-0.00210126	0.811969
ENSG00000110060.7	-0.00705884	0.879377
ENSG00000110063.7	0.0317467	0.258275
ENSG00000110074.9	0.0345615	0.113683
ENSG00000110080.17	0.0268232	0.0190995
ENSG00000110104.10	0.0046875	0.649315
ENSG00000110107.7	-0.00458033	0.273935
ENSG00000110108.8	0.000953424	0.827563
ENSG00000110172.10	-0.000645095	0.95613
ENSG00000110315.5	0.000929834	0.84149
ENSG00000110321.14	-0.000490213	0.389592
ENSG00000110367.10	0.000673722	0.862151
ENSG00000110375.2	-0.393149	0.355681
ENSG00000110400.9	-0.000387416	0.581662
ENSG00000110429.12	0.0161161	0.142895
ENSG00000110435.10	-0.00336463	0.855511
ENSG00000110536.12	0.029738	0.297202
ENSG00000110660.13	0.0047739	0.720127
ENSG00000110713.14	-0.002315	0.662333
ENSG00000110717.9	-0.000581315	0.820273
ENSG00000110721.10	0.026598	0.429583
ENSG00000110756.16	0.00140114	0.940391
ENSG00000110768.10	0.000775242	0.956734
ENSG00000110844.12	-0.0749625	0.119197
ENSG00000110871.13	0.000791433	0.976295
ENSG00000110888.16	-0.0109261	0.682617
ENSG00000110906.11	-0.00287066	0.63868
ENSG00000110921.10	-0.00927237	0.43439
ENSG00000110944.7	0.0201957	0.24079
ENSG00000110987.7	-0.0520357	0.0595112
ENSG00000111011.16	0.00276621	0.809353
ENSG00000111058.6	0.0287293	0.0635106
ENSG00000111110.10	-0.0104517	0.742786
ENSG00000111199.9	-0.0107687	0.391035
ENSG00000111203.10	-0.0611145	0.188168
ENSG00000111206.11	-0.00442672	0.446528
ENSG00000111215.10	0.00654906	0.741644
ENSG00000111231.7	0.0147889	0.651707
ENSG00000111237.17	0.00371666	0.65569
ENSG00000111247.13	-0.00578585	0.833602
ENSG00000111254.6	0.14889	0.524078
ENSG00000111271.13	-0.0268602	0.387627
ENSG00000111358.12	-0.00553121	0.704405
ENSG00000111361.11	-0.0137947	0.365095
ENSG00000111412.5	-0.020192	0.260374
ENSG00000111432.4	0.0187409	0.0255319
ENSG00000111481.8	-0.00183915	0.696958
ENSG00000111540.14	-0.00182411	0.603619
ENSG00000111596.10	0.00634123	0.273744
ENSG00000111639.6	-0.000311247	0.939409
ENSG00000111640.13	-3.88529e-05	0.752774
ENSG00000111647.11	0.0116487	0.648507
ENSG00000111653.18	-0.0149271	0.484945
ENSG00000111665.10	0.00844878	0.691443
ENSG00000111666.9	-0.00918779	0.535714
ENSG00000111667.12	-0.00435689	0.425095
ENSG00000111696.10	0.0173514	0.505335
ENSG00000111707.10	-0.0106628	0.463948
ENSG00000111711.8	-0.000708651	0.897077
ENSG00000111725.9	-0.021947	0.282742
ENSG00000111727.10	-0.00884481	0.806587
ENSG00000111737.10	-0.0082721	0.45694
ENSG00000111785.17	-0.0147326	0.831142
ENSG00000111786.7	-0.004515	0.578845
ENSG00000111790.12	0.01343	0.459168
ENSG00000111802.12	0.0112948	0.367326
ENSG00000111817.15	0.00458515	0.198238
ENSG00000111845.4	-0.0201159	0.422746
ENSG00000111877.16	-0.0590333	0.20782
ENSG00000111880.14	0.00160411	0.964535
ENSG00000111897.6	0.00476209	0.29209
ENSG00000111913.14	0.0284704	0.258396
ENSG00000112029.8	-0.0101557	0.746839
ENSG00000112078.12	-0.00470638	0.512319
ENSG00000112110.8	0.00227236	0.845797
ENSG00000112237.11	0.00822627	0.382318
ENSG00000112249.12	0.00489165	0.404107
ENSG00000112276.12	0.0341352	0.115639
ENSG00000112282.16	-0.0140289	0.607728
ENSG00000112290.11	0.0125321	0.606304
ENSG00000112293.13	-0.264091	0.188166
ENSG00000112294.11	-0.028221	0.16878
ENSG00000112304.9	0.0155488	0.525929
ENSG00000112333.10	-0.106086	0.531185
ENSG00000112367.9	0.0187263	0.683128
ENSG00000112425.12	0.128818	0.0644583
ENSG00000112473.15	-0.0032392	0.397961
ENSG00000112530.10	-0.0452287	0.886107
ENSG00000112531.15	0.00320106	0.589676
ENSG00000112541.12	-0.0240274	0.657456
ENSG00000112576.11	0.000724244	0.86983
ENSG00000112578.8	-0.0218502	0.168528
ENSG00000112592.11	0.0385657	0.465949
ENSG00000112624.11	-0.025025	0.297049
ENSG00000112697.14	-0.0015625	0.634169
ENSG00000112699.9	-0.000340751	0.985398
ENSG00000112739.15	-0.00952645	0.425179
ENSG00000112855.13	0.000500217	0.983073
ENSG00000112877.7	0.00360077	0.921214
ENSG00000112902.10	0.00202544	0.751266
ENSG00000112977.14	-0.00299654	0.413786
ENSG00000112983.16	0.00962605	0.562654
ENSG00000112984.10	-0.00324502	0.75525
ENSG00000112992.15	0.00174956	0.76505
ENSG00000112996.8	-0.000145041	0.990516
ENSG00000113048.15	0.00553755	0.555426
ENSG00000113141.14	0.00393201	0.615144
ENSG00000113161.14	0.00206687	0.50788
ENSG00000113163.14	0.012068	0.314604
ENSG00000113248.5	0.000398906	0.996456
ENSG00000113263.11	0.0287084	0.372437
ENSG00000113296.13	0.00285218	0.0180344
ENSG00000113318.9	0.0167724	0.644385
ENSG00000113319.10	0.0511022	0.265166
ENSG00000113328.17	0.0120598	0.134457
ENSG00000113360.15	-0.000965772	0.914175
ENSG00000113368.10	-0.00216814	0.690122
ENSG00000113384.12	-0.00160737	0.793306
ENSG00000113407.12	0.00228201	0.56817
ENSG00000113430.8	-0.00854493	0.499251
ENSG00000113441.14	0.00882514	0.302375
ENSG00000113522.12	0.0110417	0.318436
ENSG00000113575.8	-0.000117308	0.975508
ENSG00000113593.10	0.0190854	0.465393
ENSG00000113615.11	0.00491138	0.662336
ENSG00000113648.15	0.00200613	0.538051
ENSG00000113712.15	-0.000138041	0.944908
ENSG00000113734.16	-0.0243437	0.680414
ENSG00000113761.10	-0.0515787	0.430627
ENSG00000113790.9	-0.0265459	0.281693
ENSG00000113810.14	-0.00134482	0.719389
ENSG00000113845.8	0.00107457	0.874997
ENSG00000113946.3	-0.142507	0.344459
ENSG00000113971.17	0.0688124	0.370617
ENSG00000114023.14	-0.00435862	0.400918
ENSG00000114209.13	-0.00117646	0.896084
ENSG00000114302.14	4.20027e-05	0.995802
ENSG00000114388.11	0.00305542	0.936816
ENSG00000114395.9	0.018339	0.523525
ENSG00000114473.12	-0.0175738	0.138591
ENSG00000114503.9	-0.00588609	0.324159
ENSG00000114573.8	0.00192353	0.693302
ENSG00000114648.10	-8.08813e-05	0.995926
ENSG00000114670.12	-0.0199809	0.730388
ENSG00000114737.14	0.0346151	0.00200828
ENSG00000114738.9	0.00516746	0.45455
ENSG00000114739.12	-0.0279188	0.641935
ENSG00000114745.12	-0.00258286	0.919546
ENSG00000114767.6	-0.00121852	0.934878
ENSG00000114779.18	-0.00553365	0.574934
ENSG00000114784.3	0.00916408	0.0626614
ENSG00000114790.11	-0.0081443	0.662456
ENSG00000114853.12	0.0582935	0.0230655
ENSG00000114857.16	-0.000881704	0.943971
ENSG00000114859.13	-0.0323839	0.534537
ENSG00000114861.17	0.00579645	0.393491
ENSG00000114923.15	0.0314037	0.144714
ENSG00000114942.12	-2.29862e-05	0.98775
ENSG00000114982.16	-0.0301756	0.159111
ENSG00000115020.15	0.00532382	0.65225
ENSG00000115073.7	-0.0086925	0.390671
ENSG00000115091.10	0.00273177	0.184925
ENSG00000115128.6	0.00129053	0.846694
ENSG00000115137.10	-0.0378382	0.806678
ENSG00000115170.12	0.00774911	0.39012
ENSG00000115194.9	0.0240568	0.108211
ENSG00000115207.12	-0.00735234	0.489846
ENSG00000115211.14	-0.0109758	0.517731
ENSG00000115233.10	0.00123493	0.874258
ENSG00000115234.9	-0.00215888	0.739213
ENSG00000115239.20	-0.111945	0.694335
ENSG00000115255.9	-0.0418143	0.198074
ENSG00000115257.14	-0.196142	0.219805
ENSG00000115267.5	0.00105831	0.674324
ENSG00000115271.9	0.0166836	0.629168
ENSG00000115282.18	-0.0568481	0.151384
ENSG00000115295.18	0.0112264	0.238808
ENSG00000115307.15	-0.00237226	0.605059
ENSG00000115317.10	-0.0681345	0.0803084
ENSG00000115339.12	-0.000544193	0.920886
ENSG00000115365.10	0.0137342	0.13911
ENSG00000115392.10	-0.0115003	0.677608
ENSG00000115414.17	4.10292e-05	0.139178
ENSG00000115415.17	0.000229456	0.567849
ENSG00000115446.10	0.0375946	0.225817
ENSG00000115459.16	-0.0716186	0.273707
ENSG00000115464.13	-0.00616628	0.336525
ENSG00000115484.13	-0.00168078	0.551205
ENSG00000115486.10	-0.0128643	0.430487
ENSG00000115525.15	0.00442616	0.836267
ENSG00000115568.14	-0.000412394	0.985927
ENSG00000115661.12	0.00823317	0.708677
ENSG00000115685.13	0.00617292	0.485008
ENSG00000115687.12	-0.0252837	0.506952
ENSG00000115758.11	-0.00124175	0.112209
ENSG00000115761.14	-0.0223763	0.222682
ENSG00000115816.12	-0.00392965	0.738308
ENSG00000115825.8	-0.00533822	0.672294
ENSG00000115827.12	-0.00232916	0.948037
ENSG00000115840.12	0.0413823	0.140947
ENSG00000115844.9	-0.00961061	0.851718
ENSG00000115866.9	0.00470839	0.46833
ENSG00000115875.17	-0.0035914	0.616598
ENSG00000115942.7	0.0274442	0.113404
ENSG00000115946.6	-0.0142812	0.48387
ENSG00000115947.12	-0.0110239	0.773755
ENSG00000115956.9	0.0123894	0.0578616
ENSG00000115966.15	0.00670215	0.677442
ENSG00000116044.14	-0.000362431	0.834507
ENSG00000116133.10	-0.00147446	0.0729078
ENSG00000116138.11	-0.00535292	0.85328
ENSG00000116151.12	-0.157717	0.161437
ENSG00000116171.15	0.010147	0.235259
ENSG00000116198.11	-0.0141048	0.494427
ENSG00000116205.9	-0.0293801	0.653329
ENSG00000116209.10	0.0025606	0.494989
ENSG00000116212.13	0.00111311	0.939591
ENSG00000116213.14	-0.0184847	0.406498
ENSG00000116237.14	-0.000697198	0.885848
ENSG00000116273.5	-0.0206069	0.27908
ENSG00000116285.11	0.00253998	0.558938
ENSG00000116299.15	0.00341481	0.504864
ENSG00000116455.12	0.0131136	0.443809
ENSG00000116459.9	0.00548245	0.25824
ENSG00000116539.9	-0.00690738	0.359168
ENSG00000116580.17	-0.00434071	0.80296
ENSG00000116586.10	-0.00303869	0.727479
ENSG00000116641.14	0.0113706	0.401624
ENSG00000116667.11	0.00495462	0.559963
ENSG00000116668.11	0.0317139	0.825222
ENSG00000116670.13	-0.00402083	0.682974
ENSG00000116679.14	0.00172687	0.31972
ENSG00000116698.19	-0.00935344	0.210799
ENSG00000116747.11	-0.00931124	0.634975
ENSG00000116750.12	0.00297558	0.867754
ENSG00000116754.12	-0.00548306	0.408458
ENSG00000116791.12	-0.00243216	0.868605
ENSG00000116830.10	0.00463996	0.738368
ENSG00000116852.13	0.019058	0.540202
ENSG00000116871.14	0.000356269	0.81572
ENSG00000116874.10	-0.0121473	0.795141
ENSG00000116883.8	-0.014846	0.83465
ENSG00000116903.7	0.0258018	0.514728
ENSG00000116906.10	0.0451211	0.00948897
ENSG00000116918.12	0.0152678	0.38514
ENSG00000116922.13	-0.0556322	0.169244
ENSG00000116954.7	-0.00546422	0.532006
ENSG00000116983.11	-0.100902	0.426511
ENSG00000116985.9	-0.0394554	0.345543
ENSG00000117054.12	0.0141871	0.225807
ENSG00000117143.12	0.000246757	0.974732
ENSG00000117262.17	0.0178875	0.901283
ENSG00000117385.14	-0.00253199	0.615102
ENSG00000117394.18	-0.000150559	0.440282
ENSG00000117395.9	-0.000970838	0.838807
ENSG00000117399.12	-0.00342842	0.424495
ENSG00000117408.9	-0.00831516	0.364261
ENSG00000117475.12	0.00518871	0.714221
ENSG00000117479.11	0.00569266	0.816212
ENSG00000117500.11	0.0159718	0.143189
ENSG00000117505.11	-0.00256793	0.776559
ENSG00000117519.14	0.00102741	0.718575
ENSG00000117543.18	0.0142435	0.692362
ENSG00000117593.9	-0.00699748	0.671326
ENSG00000117598.10	-0.575591	0.383994
ENSG00000117616.16	-0.000100791	0.993192
ENSG00000117620.11	0.00679104	0.737126
ENSG00000117650.11	-0.00217012	0.913559
ENSG00000117697.13	0.00411386	0.898683
ENSG00000117862.10	0.00103108	0.883291
ENSG00000117877.9	0.014338	0.772992
ENSG00000117984.11	0.000132567	0.752158
ENSG00000118007.11	-0.00210162	0.829224
ENSG00000118096.6	-0.0086534	0.643881
ENSG00000118162.12	-0.0635255	0.129759
ENSG00000118181.9	0.000914621	0.325281
ENSG00000118197.12	0.0145512	0.690741
ENSG00000118217.5	-0.00595798	0.667784
ENSG00000118246.12	0.00797834	0.617043
ENSG00000118260.13	0.00577287	0.68796
ENSG00000118276.10	-0.00308235	0.95746
ENSG00000118298.9	0.206935	0.152553
ENSG00000118307.17	0.0214081	0.985188
ENSG00000118363.10	0.0127425	0.372195
ENSG00000118369.11	0.00079633	0.986205
ENSG00000118454.11	0.0244756	0.505873
ENSG00000118492.15	-1.51543	0.52836
ENSG00000118523.5	0.0011485	0.108918
ENSG00000118564.13	0.000518612	0.943111
ENSG00000118579.10	-0.00789725	0.593143
ENSG00000118640.9	-0.00145413	0.62939
ENSG00000118655.4	-0.0269674	0.42592
ENSG00000118680.11	-0.000204958	0.779287
ENSG00000118707.8	-0.00712465	0.53771
ENSG00000118849.8	0.0114819	0.129118
ENSG00000118855.17	0.00140043	0.822339
ENSG00000118894.13	-0.162085	0.0277983
ENSG00000118900.13	-0.0130666	0.0749281
ENSG00000118939.16	0.00963965	0.640982
ENSG00000118965.13	0.028466	0.325421
ENSG00000118985.13	-0.000720732	0.733975
ENSG00000119013.7	0.0124612	0.32051
ENSG00000119048.6	0.00539879	0.509288
ENSG00000119185.11	-0.00116686	0.911805
ENSG00000119203.12	-0.00815308	0.593562
ENSG00000119242.7	-0.0127204	0.223646
ENSG00000119321.7	-0.00121271	0.872932
ENSG00000119328.10	-0.00270054	0.914549
ENSG00000119383.18	0.00145715	0.590988
ENSG00000119402.15	-0.00126011	0.867532
ENSG00000119421.6	0.00672115	0.454368
ENSG00000119446.12	0.036064	0.098194
ENSG00000119509.11	-0.0352292	0.425541
ENSG00000119523.9	0.00833222	0.41399
ENSG00000119537.14	0.00228583	0.749837
ENSG00000119616.10	-0.00466682	0.572535
ENSG00000119636.14	-0.0100542	0.933482
ENSG00000119638.11	-0.0162855	0.126809
ENSG00000119655.7	0.000532184	0.770402
ENSG00000119669.4	-0.00687859	0.45344
ENSG00000119682.15	-0.0242547	0.0607157
ENSG00000119686.8	0.0108952	0.483477
ENSG00000119688.19	-0.01993	0.402307
ENSG00000119705.8	-0.00462008	0.601288
ENSG00000119707.12	-0.00654635	0.420457
ENSG00000119711.11	-0.063252	0.0695525
ENSG00000119715.13	-0.0416632	0.826236
ENSG00000119723.14	-0.0881761	0.362252
ENSG00000119729.9	0.0147964	0.145074
ENSG00000119760.14	-0.0303118	0.293518
ENSG00000119778.13	-0.0485452	0.178438
ENSG00000119782.12	-0.0495508	0.525883
ENSG00000119844.13	-0.0130758	0.512022
ENSG00000119862.11	0.00124014	0.45477
ENSG00000119878.5	0.000682271	0.982277
ENSG00000119888.9	0.00182571	0.405573
ENSG00000119906.10	0.0107483	0.593614
ENSG00000119965.11	0.070257	0.487203
ENSG00000120008.14	0.00431013	0.747563
ENSG00000120051.13	0.0595128	0.65439
ENSG00000120053.10	0.00311728	0.724617
ENSG00000120253.12	-0.00148057	0.948959
ENSG00000120256.8	0.00246929	0.660319
ENSG00000120265.15	0.00963809	0.21325
ENSG00000120334.14	-0.0299454	0.573344
ENSG00000120370.11	-0.0382935	0.462593
ENSG00000120438.10	0.00110907	0.731887
ENSG00000120458.8	-0.00640742	0.943418
ENSG00000120509.9	-0.0139342	0.374021
ENSG00000120526.9	0.00988678	0.433196
ENSG00000120533.11	-0.000718641	0.925548
ENSG00000120539.13	-0.000941791	0.954275
ENSG00000120647.8	-0.00790152	0.873261
ENSG00000120656.10	-0.041869	0.269341
ENSG00000120658.11	0.0281869	0.775834
ENSG00000120685.18	-0.00595635	0.719015
ENSG00000120688.8	0.053505	0.146333
ENSG00000120690.12	0.00585343	0.423291
ENSG00000120725.11	-0.00339155	0.642811
ENSG00000120742.9	-0.00109837	0.684863
ENSG00000120802.12	-0.00168568	0.646856
ENSG00000120820.11	0.00631464	0.654228
ENSG00000120868.12	0.00538515	0.837201
ENSG00000120889.11	0.000604883	0.899163
ENSG00000120896.12	-0.000417989	0.931015
ENSG00000120899.16	-0.00298148	0.679807
ENSG00000120925.12	-0.00664571	0.808329
ENSG00000121057.11	0.000332179	0.97187
ENSG00000121060.13	0.000258444	0.963881
ENSG00000121068.12	0.0224406	0.271212
ENSG00000121073.12	0.000771933	0.952739
ENSG00000121101.14	1.6601	0.00460849
ENSG00000121104.6	0.0107412	0.531634
ENSG00000121289.16	-0.0150594	0.553825
ENSG00000121297.6	0.00908967	0.543757
ENSG00000121310.15	-0.0100072	0.513255
ENSG00000121316.9	-0.000698098	0.868501
ENSG00000121440.13	-0.0010789	0.95331
ENSG00000121486.10	0.0344963	0.353482
ENSG00000121579.11	-0.0014634	0.549356
ENSG00000121621.6	-0.0070326	0.821722
ENSG00000121766.13	-0.00597587	0.757457
ENSG00000121797.9	0.25211	0.00875127
ENSG00000121851.11	0.0152358	0.510944
ENSG00000121879.3	-0.00439128	0.766497
ENSG00000121897.12	0.035361	0.630778
ENSG00000121931.14	-0.00266071	0.915727
ENSG00000121988.16	-0.113363	0.300011
ENSG00000122008.14	0.0505555	0.210183
ENSG00000122026.9	0.000171098	0.924691
ENSG00000122218.13	-0.000681093	0.804682
ENSG00000122299.10	-0.0110139	0.66561
ENSG00000122335.12	-0.0660403	0.179111
ENSG00000122376.10	0.0153362	0.588887
ENSG00000122390.16	-0.0261683	0.235788
ENSG00000122432.15	0.997185	0.428828
ENSG00000122435.8	0.0527261	0.442901
ENSG00000122481.15	0.138601	0.370982
ENSG00000122483.16	-0.0214442	0.770176
ENSG00000122484.8	-0.0229204	0.54167
ENSG00000122507.19	-0.0299694	0.60644
ENSG00000122512.13	-0.0644087	0.217985
ENSG00000122545.16	0.00211786	0.624776
ENSG00000122550.16	-0.00170236	0.947492
ENSG00000122557.8	-6.47848e-05	0.99722
ENSG00000122565.17	0.000838075	0.769964
ENSG00000122566.19	3.42798e-05	0.974156
ENSG00000122592.7	-0.037472	0.802514
ENSG00000122687.16	-0.0395614	0.0911615
ENSG00000122741.14	-0.00378541	0.701522
ENSG00000122787.13	-3.19051	0.540408
ENSG00000122882.9	0.0386061	0.130832
ENSG00000123064.11	-0.0104256	0.200258
ENSG00000123080.9	-0.0108635	0.268365
ENSG00000123094.14	-0.00119994	0.950134
ENSG00000123119.10	-0.112537	0.428183
ENSG00000123124.12	0.0111555	0.251907
ENSG00000123154.10	-0.0600666	0.462874
ENSG00000123191.12	0.0847929	0.202305
ENSG00000123200.15	0.000721896	0.933888
ENSG00000123213.21	0.0253427	0.120192
ENSG00000123219.11	-0.00407309	0.89655
ENSG00000123240.15	0.000851623	0.698736
ENSG00000123353.8	-0.0039436	0.706791
ENSG00000123364.4	-0.00713563	0.763525
ENSG00000123405.12	0.139596	0.236521
ENSG00000123472.11	-0.00337306	0.86313
ENSG00000123562.15	-0.000716172	0.822668
ENSG00000123600.17	0.00175327	0.88716
ENSG00000123684.11	0.00802306	0.334507
ENSG00000123700.4	0.0192686	0.189026
ENSG00000123908.10	-0.0106041	0.131382
ENSG00000123977.8	-0.257161	0.704683
ENSG00000123989.12	-0.000170967	0.887032
ENSG00000124074.10	-0.0189265	0.50941
ENSG00000124104.17	-0.0176199	0.445905
ENSG00000124116.17	-0.372446	0.396968
ENSG00000124140.11	0.0485177	0.521403
ENSG00000124201.13	0.00084067	0.727134
ENSG00000124207.15	-0.000354949	0.924719
ENSG00000124209.3	-0.00497768	0.393794
ENSG00000124217.4	-0.0381994	0.398243
ENSG00000124224.15	-0.00983106	0.820753
ENSG00000124249.6	0.28453	0.328757
ENSG00000124260.10	-0.0434447	0.461332
ENSG00000124275.13	0.0135982	0.466038
ENSG00000124357.11	-0.00465855	0.443244
ENSG00000124370.9	0.0424494	0.609102
ENSG00000124383.7	-0.00921168	0.597842
ENSG00000124406.15	0.0977753	0.0218866
ENSG00000124444.14	-0.086877	0.197004
ENSG00000124571.16	-0.0116993	0.1931
ENSG00000124635.8	-0.0411329	0.407633
ENSG00000124641.13	-0.0311395	0.198141
ENSG00000124659.6	-0.0165012	0.465216
ENSG00000124688.12	-0.0308129	0.366646
ENSG00000124702.16	-0.00505957	0.33681
ENSG00000124721.16	-0.238833	0.761017
ENSG00000124733.3	-0.0137987	0.136276
ENSG00000124784.7	-0.0209321	0.204757
ENSG00000124788.16	0.00212019	0.811205
ENSG00000124789.10	-0.00570582	0.331104
ENSG00000125122.13	-0.188892	0.26491
ENSG00000125166.11	-0.0063808	0.143171
ENSG00000125285.5	-0.00378475	0.795853
ENSG00000125304.8	0.00224443	0.419158
ENSG00000125337.15	-0.0846598	0.74211
ENSG00000125352.5	-0.00208019	0.952351
ENSG00000125354.21	0.0157309	0.15306
ENSG00000125356.6	-0.00235421	0.637146
ENSG00000125375.13	-0.0205765	0.591961
ENSG00000125388.18	-0.0973976	0.244205
ENSG00000125445.9	-0.00606509	0.51963
ENSG00000125447.15	-0.0212227	0.351868
ENSG00000125457.12	-0.0135532	0.635711
ENSG00000125458.5	-0.00596907	0.62197
ENSG00000125459.13	-0.123314	0.0720823
ENSG00000125484.10	-0.00269863	0.794167
ENSG00000125485.16	0.00781341	0.782411
ENSG00000125505.15	0.00020308	0.980026
ENSG00000125508.3	-0.568183	0.0909231
ENSG00000125510.14	-0.019053	0.873606
ENSG00000125531.6	-0.864826	0.0494768
ENSG00000125633.9	-0.00288142	0.881804
ENSG00000125651.12	-0.00152462	0.853554
ENSG00000125656.7	0.00128981	0.905997
ENSG00000125733.16	0.000318044	0.944311
ENSG00000125734.12	-0.00105268	0.938092
ENSG00000125743.9	-0.00326627	0.328349
ENSG00000125755.17	-0.00912704	0.223692
ENSG00000125779.20	0.01116	0.609795
ENSG00000125816.4	-1.8115	0.48967
ENSG00000125817.7	-0.00305306	0.500339
ENSG00000125827.7	0.0029157	0.760332
ENSG00000125850.9	-0.0659666	0.255016
ENSG00000125864.10	-0.0728775	0.268776
ENSG00000125868.14	0.000243698	0.822814
ENSG00000125869.8	-0.00359337	0.867116
ENSG00000125870.9	0.00277991	0.677548
ENSG00000125871.12	0.000720861	0.954852
ENSG00000125885.12	0.00803394	0.652111
ENSG00000125895.5	0.105631	0.241323
ENSG00000125945.13	-0.0234331	0.173544
ENSG00000125965.7	-1.02053	0.19346
ENSG00000125967.15	-0.0253672	0.428181
ENSG00000125970.10	-0.00394644	0.23653
ENSG00000125995.14	-0.00236416	0.554229
ENSG00000125999.9	0.000325379	0.677557
ENSG00000126001.14	-0.0144957	0.340232
ENSG00000126003.6	-0.0134675	0.202316
ENSG00000126070.17	-0.0503602	0.144422
ENSG00000126088.11	-0.00239897	0.733303
ENSG00000126106.12	-0.0276601	0.70361
ENSG00000126107.13	-0.000126258	0.990976
ENSG00000126214.19	-0.0143903	0.269464
ENSG00000126215.12	-0.0395111	0.150727
ENSG00000126226.20	0.00114798	0.951166
ENSG00000126261.11	-0.0126258	0.095019
ENSG00000126264.8	0.0469811	0.16093
ENSG00000126432.12	-0.000661347	0.592309
ENSG00000126453.8	-0.0114844	0.627859
ENSG00000126456.14	-0.00239915	0.743605
ENSG00000126524.8	0.00498722	0.44025
ENSG00000126749.13	-0.00746247	0.629646
ENSG00000126756.10	0.000601733	0.95202
ENSG00000126768.11	-0.00424458	0.723816
ENSG00000126773.11	0.00189005	0.883455
ENSG00000126790.10	0.024835	0.429553
ENSG00000126803.9	-0.00472143	0.0754209
ENSG00000126814.6	-0.0212263	0.390269
ENSG00000126858.15	0.0169657	0.53702
ENSG00000126890.13	-0.0196799	0.60534
ENSG00000126945.8	-0.00256874	0.719309
ENSG00000127054.17	-0.00686523	0.390997
ENSG00000127125.8	-0.00855746	0.565119
ENSG00000127220.5	-0.0570995	0.156257
ENSG00000127249.13	-0.0116793	0.443488
ENSG00000127328.20	0.00468721	0.749313
ENSG00000127415.11	-0.0246988	0.436433
ENSG00000127419.15	-0.00870001	0.786828
ENSG00000127423.9	-0.109449	0.149848
ENSG00000127445.12	-0.000156633	0.990033
ENSG00000127452.7	-0.0502042	0.297816
ENSG00000127463.12	-0.00493973	0.465813
ENSG00000127481.13	-0.00267473	0.353437
ENSG00000127526.12	-0.00429286	0.532189
ENSG00000127528.5	8.39656e-05	0.996077
ENSG00000127554.12	-0.0409988	0.254574
ENSG00000127561.13	-0.0488775	0.280214
ENSG00000127586.15	-0.0240564	0.167058
ENSG00000127720.6	0.0428978	0.819457
ENSG00000127774.6	-0.0717686	0.595766
ENSG00000127837.8	0.00665765	0.261704
ENSG00000127838.12	0.00648488	0.539914
ENSG00000127870.15	-0.00187818	0.893023
ENSG00000127903.13	1.52006	0.0440879
ENSG00000127952.15	-0.00234608	0.833429
ENSG00000127980.14	-0.00928282	0.709734
ENSG00000127990.14	0.00871421	0.493632
ENSG00000127993.13	-0.00976844	0.851988
ENSG00000128050.7	0.00227413	0.531558
ENSG00000128059.7	0.00565038	0.821541
ENSG00000128185.8	-0.0320747	0.0746785
ENSG00000128309.15	-0.00470653	0.454182
ENSG00000128311.12	-0.00478042	0.561193
ENSG00000128342.4	0.00661691	0.560974
ENSG00000128408.8	-0.0730391	0.28125
ENSG00000128487.15	0.00542011	0.552363
ENSG00000128512.18	0.0227666	0.254774
ENSG00000128513.13	-0.00451651	0.87921
ENSG00000128524.4	-0.00119788	0.775663
ENSG00000128536.14	-0.0702046	0.676717
ENSG00000128585.16	-0.0130422	0.437526
ENSG00000128590.4	-0.000504401	0.966995
ENSG00000128626.10	-0.00579839	0.545362
ENSG00000128641.16	0.000226814	0.863365
ENSG00000128645.12	-0.281974	0.524134
ENSG00000128652.10	-0.72712	0.629796
ENSG00000128694.10	0.144325	0.114226
ENSG00000128699.12	0.0279055	0.236921
ENSG00000128789.19	0.00161314	0.885825
ENSG00000128791.10	-0.0038992	0.609114
ENSG00000128872.8	0.022433	0.323459
ENSG00000128886.10	0.00599404	0.982854
ENSG00000128915.10	-0.0127518	0.606538
ENSG00000128923.9	-0.00164492	0.899839
ENSG00000128951.12	0.00242552	0.750772
ENSG00000129003.14	-0.00211443	0.80278
ENSG00000129055.11	0.00570967	0.566481
ENSG00000129071.8	-0.00322306	0.827745
ENSG00000129084.16	0.00651037	0.329429
ENSG00000129128.11	0.00728326	0.240653
ENSG00000129197.13	-0.00600258	0.828891
ENSG00000129214.13	-4.63049	0.0489228
ENSG00000129219.12	-0.00270681	0.498605
ENSG00000129235.9	-0.0037721	0.316296
ENSG00000129245.10	-0.00650162	0.725607
ENSG00000129250.10	-0.00053864	0.76392
ENSG00000129255.13	0.000530185	0.938252
ENSG00000129317.13	0.00151572	0.958453
ENSG00000129351.16	-0.00430927	0.19922
ENSG00000129422.12	-0.00116621	0.856557
ENSG00000129472.11	0.0174698	0.585476
ENSG00000129473.8	-0.00552791	0.479604
ENSG00000129474.14	-0.0022604	0.500571
ENSG00000129484.12	-0.0316267	0.241871
ENSG00000129493.13	-0.0119387	0.659379
ENSG00000129514.5	-0.00270916	0.793001
ENSG00000129535.11	-0.514914	0.269665
ENSG00000129559.11	-0.00172502	0.755656
ENSG00000129595.11	-0.0433542	0.337958
ENSG00000129654.7	-0.0139349	0.685826
ENSG00000129673.8	-1.25089	0.190888
ENSG00000129933.19	-0.0132282	0.318498
ENSG00000130023.14	0.00298993	0.931088
ENSG00000130024.13	0.00475907	0.662631
ENSG00000130035.5	0.0171779	0.575303
ENSG00000130066.15	0.000284584	0.728777
ENSG00000130150.10	0.0389893	0.286018
ENSG00000130165.9	-0.0052109	0.620108
ENSG00000130175.8	-0.00032178	0.880476
ENSG00000130193.7	-0.0109357	0.421796
ENSG00000130204.11	-0.00826711	0.231776
ENSG00000130234.9	-0.00140103	0.955451
ENSG00000130299.15	-0.0392499	0.222874
ENSG00000130303.11	-0.000163037	0.795553
ENSG00000130311.9	-0.0227302	0.170642
ENSG00000130313.5	-0.0102171	0.220615
ENSG00000130332.13	-0.000874217	0.893088
ENSG00000130347.11	0.0399516	0.364499
ENSG00000130348.10	0.0647025	0.178535
ENSG00000130396.19	-0.00135471	0.738945
ENSG00000130522.5	-0.0029217	0.31334
ENSG00000130559.17	-0.00379831	0.565685
ENSG00000130653.14	0.0291234	0.673363
ENSG00000130675.13	0.216018	0.301854
ENSG00000130701.3	-0.0428638	0.546305
ENSG00000130725.6	-0.00904061	0.320037
ENSG00000130726.10	-0.00445198	0.0592105
ENSG00000130731.14	-0.0135551	0.253086
ENSG00000130733.9	-0.0114958	0.404787
ENSG00000130749.8	-0.0427516	0.0169057
ENSG00000130755.11	0.0282222	0.103525
ENSG00000130818.9	-0.00170764	0.863118
ENSG00000130821.14	-0.0034589	0.108006
ENSG00000130822.14	-0.0529852	0.174046
ENSG00000130856.14	0.00193541	0.962441
ENSG00000131023.11	-0.00724936	0.688047
ENSG00000131037.13	-0.00113057	0.728238
ENSG00000131042.12	0.0490067	0.00246195
ENSG00000131044.15	-2.20143	0.200541
ENSG00000131061.12	-0.268655	0.0386317
ENSG00000131067.15	-0.0629397	0.0537607
ENSG00000131069.18	-0.0135554	0.276627
ENSG00000131096.9	-3.23789	0.2285
ENSG00000131100.11	-0.00436907	0.373016
ENSG00000131143.7	-0.000778422	0.578224
ENSG00000131148.7	0.01642	0.437479
ENSG00000131165.13	-0.00304933	0.457531
ENSG00000131171.11	0.00264839	0.669655
ENSG00000131351.13	-0.0245717	0.506663
ENSG00000131355.13	0.260294	0.503008
ENSG00000131373.13	0.041917	0.292659
ENSG00000131374.13	-0.00315868	0.785997
ENSG00000131375.8	0.00440099	0.889174
ENSG00000131462.6	-0.0107534	0.32894
ENSG00000131467.9	-0.00242561	0.62148
ENSG00000131473.15	-0.00274913	0.411685
ENSG00000131495.7	0.00204408	0.785073
ENSG00000131503.19	-0.0017635	0.989418
ENSG00000131504.14	-9.58815e-05	0.965694
ENSG00000131652.12	-0.0266527	0.111525
ENSG00000131653.11	-0.00539868	0.201139
ENSG00000131668.12	-0.0112425	0.550964
ENSG00000131732.10	0.0541582	0.186669
ENSG00000131773.12	0.023346	0.454925
ENSG00000131778.16	0.0251558	0.0653023
ENSG00000131779.9	0.00849558	0.704739
ENSG00000131781.11	-0.023207	0.906911
ENSG00000131791.7	0.00840886	0.458958
ENSG00000131797.11	0.00128742	0.976522
ENSG00000131845.13	0.00679151	0.876841
ENSG00000131848.8	-0.0718737	0.430167
ENSG00000131849.10	-0.100303	0.566425
ENSG00000131876.15	-0.012766	0.372982
ENSG00000131944.8	-0.0128924	0.889236
ENSG00000131951.9	-0.412433	0.819984
ENSG00000132000.10	0.0289504	0.0880211
ENSG00000132016.10	-0.135631	0.122707
ENSG00000132017.9	-0.015625	0.393118
ENSG00000132024.16	-0.0155306	0.153928
ENSG00000132128.15	-0.00611228	0.339703
ENSG00000132141.12	0.0368535	0.875226
ENSG00000132254.11	0.00164629	0.849265
ENSG00000132256.17	0.00382236	0.747645
ENSG00000132259.11	-0.559188	0.82704
ENSG00000132275.9	0.0311542	0.334062
ENSG00000132286.10	0.00595467	0.835054
ENSG00000132300.17	0.0030627	0.831238
ENSG00000132305.19	0.00481789	0.600896
ENSG00000132361.15	-0.0078307	0.0461505
ENSG00000132376.18	-0.0184856	0.226592
ENSG00000132383.10	-0.00539375	0.279798
ENSG00000132394.9	-0.0271142	0.16172
ENSG00000132424.13	0.00560468	0.552993
ENSG00000132432.12	-0.000299905	0.713691
ENSG00000132466.16	-0.00299937	0.535634
ENSG00000132478.8	-0.0273614	0.272651
ENSG00000132485.11	0.00935655	0.528571
ENSG00000132541.9	-0.00442494	0.833817
ENSG00000132549.17	-0.00682788	0.555124
ENSG00000132581.8	-0.00466525	0.757807
ENSG00000132589.14	-0.00119119	0.723593
ENSG00000132591.10	-0.0064464	0.655548
ENSG00000132600.15	0.00161535	0.93722
ENSG00000132603.12	-0.00760083	0.550633
ENSG00000132635.15	-0.000788164	0.963207
ENSG00000132646.9	1.52425e-05	0.995661
ENSG00000132661.3	-0.0138531	0.499762
ENSG00000132664.10	0.0102479	0.795094
ENSG00000132692.17	-0.322972	0.21278
ENSG00000132716.17	0.00468835	0.814561
ENSG00000132718.8	0.021709	0.0911621
ENSG00000132740.7	0.00232547	0.720413
ENSG00000132763.13	-0.16899	0.0360871
ENSG00000132773.10	-0.0613259	0.309168
ENSG00000132781.16	-0.0721838	0.161054
ENSG00000132801.6	-0.0710901	0.542855
ENSG00000132823.9	-0.0011782	0.949912
ENSG00000132837.13	0.406701	0.639645
ENSG00000132846.5	-0.0325229	0.44681
ENSG00000132849.17	-0.0057665	0.584694
ENSG00000132906.16	-0.0326844	0.350689
ENSG00000132950.17	0.0225556	0.750914
ENSG00000132952.10	0.0733185	0.159715
ENSG00000133027.16	-0.0182679	0.485034
ENSG00000133028.9	-0.0266907	0.277498
ENSG00000133112.15	8.0401e-05	0.640952
ENSG00000133114.16	0.100584	0.0533499
ENSG00000133124.11	0.0138822	0.986587
ENSG00000133247.12	-0.0388135	0.397629
ENSG00000133302.11	0.0224854	0.681467
ENSG00000133460.18	-0.0094403	0.910375
ENSG00000133597.8	-0.0044045	0.783089
ENSG00000133639.4	-0.00601377	0.0238506
ENSG00000133640.17	0.124124	0.521983
ENSG00000133641.16	-0.0148947	0.517046
ENSG00000133678.12	-0.0148715	0.380498
ENSG00000133740.9	0.0547987	0.37144
ENSG00000133773.10	-0.0122321	0.667134
ENSG00000133872.12	0.00400299	0.320329
ENSG00000133943.19	0.0152263	0.316451
ENSG00000133958.12	0.317666	0.473353
ENSG00000133980.4	-17.0112	0.0803622
ENSG00000133985.2	-0.00327872	0.585987
ENSG00000134001.11	-0.00410194	0.291629
ENSG00000134077.14	-0.00840035	0.775109
ENSG00000134107.4	-8.32875e-06	0.992431
ENSG00000134109.9	0.00735593	0.329692
ENSG00000134121.8	0.00677029	0.121072
ENSG00000134146.10	0.0475126	0.49332
ENSG00000134153.8	0.0114748	0.31259
ENSG00000134215.14	0.0028047	0.659654
ENSG00000134247.9	-0.000286458	0.767656
ENSG00000134255.12	0.0515412	0.151554
ENSG00000134262.11	0.00673544	0.901462
ENSG00000134278.13	-0.0275684	0.143576
ENSG00000134283.16	0.00185777	0.923242
ENSG00000134291.10	-0.0112156	0.211474
ENSG00000134297.6	0.100905	0.618624
ENSG00000134321.10	5.28995e-05	0.977332
ENSG00000134324.10	-0.00916073	0.697417
ENSG00000134326.10	0.000525286	0.929387
ENSG00000134352.18	0.00236451	0.542736
ENSG00000134444.12	-0.000634004	0.94495
ENSG00000134452.18	-0.00287977	0.793212
ENSG00000134461.14	-0.0219718	0.772836
ENSG00000134575.8	0.0178079	0.048337
ENSG00000134690.9	-0.0138237	0.331254
ENSG00000134717.16	0.00365976	0.78087
ENSG00000134748.12	-0.0172637	0.391098
ENSG00000134755.13	-0.000255667	0.343112
ENSG00000134758.12	0.0125132	0.55528
ENSG00000134759.12	0.00210896	0.803254
ENSG00000134779.13	0.00461906	0.338616
ENSG00000134824.12	-0.000482408	0.871485
ENSG00000134825.12	0.00203162	0.787448
ENSG00000134851.11	0.00583101	0.240236
ENSG00000134852.13	-0.00486925	0.680714
ENSG00000134882.14	0.000664224	0.933587
ENSG00000134897.12	0.0463438	0.282331
ENSG00000134901.11	0.0029531	0.937292
ENSG00000134905.15	-0.00103622	0.940035
ENSG00000134910.11	0.00388682	0.294543
ENSG00000134987.10	0.00173422	0.904586
ENSG00000134996.11	0.00551823	0.501254
ENSG00000135018.12	0.00347448	0.351854
ENSG00000135045.6	-0.0668224	0.293831
ENSG00000135077.7	0.0233587	0.0998069
ENSG00000135097.5	0.00126717	0.978824
ENSG00000135119.13	-0.0806263	0.385454
ENSG00000135164.17	-0.00570137	0.764043
ENSG00000135205.13	-0.0279015	0.44385
ENSG00000135211.5	-0.0210709	0.678345
ENSG00000135241.15	-0.00429044	0.703633
ENSG00000135298.12	0.304662	0.389821
ENSG00000135336.13	0.0201564	0.418316
ENSG00000135404.10	0.000789783	0.334113
ENSG00000135424.14	0.0307637	5.88315e-05
ENSG00000135441.6	-0.00809235	0.561521
ENSG00000135446.15	-0.00162309	0.770898
ENSG00000135473.13	-0.026492	0.273524
ENSG00000135486.16	-0.000276972	0.835926
ENSG00000135502.15	0.730438	0.589452
ENSG00000135517.6	0.373082	0.812257
ENSG00000135525.17	-0.0114523	0.133113
ENSG00000135535.13	0.00217915	0.462875
ENSG00000135540.10	-0.0167129	0.160085
ENSG00000135541.19	-0.0481434	0.403731
ENSG00000135549.13	0.0637147	0.16325
ENSG00000135587.7	-0.0495651	0.171286
ENSG00000135617.3	0.000832921	0.977362
ENSG00000135624.14	-0.0015897	0.477951
ENSG00000135637.12	-0.125141	0.235598
ENSG00000135677.9	0.00291739	0.222947
ENSG00000135698.8	0.00194686	0.906577
ENSG00000135720.11	-0.00137861	0.849481
ENSG00000135722.7	-0.00963796	0.90524
ENSG00000135763.8	-0.0261251	0.335424
ENSG00000135801.8	-0.00646883	0.805858
ENSG00000135837.14	-0.00615352	0.569069
ENSG00000135870.10	-0.00716184	0.719877
ENSG00000135903.17	0.0281064	0.834939
ENSG00000135913.9	-0.0264309	0.390845
ENSG00000135930.12	0.0070046	0.293711
ENSG00000135951.13	-0.024806	0.890469
ENSG00000135953.9	-0.00601164	0.889736
ENSG00000135956.7	-0.00406313	0.574272
ENSG00000135972.7	0.000924227	0.964049
ENSG00000135974.8	0.0536786	0.302632
ENSG00000136002.15	-0.00334676	0.327672
ENSG00000136014.10	0.184379	0.621894
ENSG00000136021.16	-0.00775677	0.426841
ENSG00000136044.10	0.00635209	0.611481
ENSG00000136051.12	0.00933383	0.315155
ENSG00000136108.13	0.00544138	0.475883
ENSG00000136122.14	-0.0222105	0.577607
ENSG00000136143.12	0.00826435	0.307764
ENSG00000136160.13	0.0115445	0.707457
ENSG00000136167.12	0.00224295	0.0661844
ENSG00000136169.15	0.115817	0.0761459
ENSG00000136261.13	-0.000124367	0.983985
ENSG00000136305.10	-0.380894	0.258222
ENSG00000136319.10	-0.0427919	0.341834
ENSG00000136367.13	-0.0178332	0.824002
ENSG00000136378.13	-0.0228029	0.331583
ENSG00000136425.11	-0.014131	0.616238
ENSG00000136449.12	-0.408873	0.449166
ENSG00000136450.11	-0.00289972	0.588053
ENSG00000136451.7	-0.00563899	0.679421
ENSG00000136490.7	0.00764545	0.555706
ENSG00000136504.10	-0.00337807	0.846093
ENSG00000136521.11	0.0023846	0.638751
ENSG00000136522.12	-0.000875719	0.918066
ENSG00000136536.13	0.00019617	0.976187
ENSG00000136630.12	0.0107893	0.82035
ENSG00000136699.18	-0.00913743	0.346085
ENSG00000136710.8	-0.0166624	0.386816
ENSG00000136718.8	-0.0104399	0.309125
ENSG00000136738.13	-0.0105373	0.475067
ENSG00000136758.17	-0.00109165	0.774988
ENSG00000136802.10	-8.15115e-05	0.960683
ENSG00000136868.10	0.00228445	0.69797
ENSG00000136870.9	0.00777878	0.832015
ENSG00000136874.9	-0.00408023	0.852297
ENSG00000136875.11	-0.0079812	0.454867
ENSG00000136897.7	0.0183352	0.427246
ENSG00000136925.13	-0.0124234	0.771043
ENSG00000136937.11	0.00178924	0.879291
ENSG00000136942.13	8.14679e-05	0.859259
ENSG00000136944.16	-0.0687224	0.268993
ENSG00000136950.12	-0.00246517	0.665947
ENSG00000136986.8	0.00618276	0.267322
ENSG00000137055.13	0.0130536	0.226661
ENSG00000137074.17	-0.0027361	0.825304
ENSG00000137076.17	-0.000519575	0.490781
ENSG00000137094.13	-0.00649693	0.535721
ENSG00000137101.11	0.0466646	0.224902
ENSG00000137103.15	-0.0296901	0.375648
ENSG00000137133.9	-0.0141953	0.348613
ENSG00000137210.12	0.0103694	0.521173
ENSG00000137216.17	-0.00331444	0.573298
ENSG00000137269.13	0.00454477	0.581221
ENSG00000137285.9	0.00613085	0.0722551
ENSG00000137310.10	-0.0070706	0.366529
ENSG00000137312.13	0.00190837	0.671649
ENSG00000137364.4	-0.0122209	0.355658
ENSG00000137413.14	-0.0265364	0.255027
ENSG00000137434.10	-0.0693429	0.851106
ENSG00000137449.14	0.0080091	0.239853
ENSG00000137492.6	-0.00611127	0.622987
ENSG00000137494.12	0.0331283	0.584202
ENSG00000137497.16	-0.00377252	0.193125
ENSG00000137500.8	0.00395336	0.838883
ENSG00000137502.8	0.0108568	0.464741
ENSG00000137522.16	0.00171995	0.913269
ENSG00000137571.9	0.220042	0.000157423
ENSG00000137574.9	0.00118385	0.930499
ENSG00000137601.14	0.031588	0.507645
ENSG00000137642.11	0.000512288	0.800815
ENSG00000137656.10	0.0331852	0.307976
ENSG00000137693.12	-0.00129574	0.441028
ENSG00000137707.12	-0.45342	0.751728
ENSG00000137720.6	0.0382904	0.217801
ENSG00000137764.18	-0.025249	0.58443
ENSG00000137770.12	-0.0159272	0.341525
ENSG00000137804.11	-0.0049129	0.439081
ENSG00000137807.12	-0.00542135	0.622964
ENSG00000137814.8	-0.0132741	0.587838
ENSG00000137819.12	-0.0095374	0.256022
ENSG00000137821.10	0.0294077	0.689389
ENSG00000137857.16	0.000412021	0.783958
ENSG00000137871.18	0.0181758	0.596679
ENSG00000137936.15	0.00837823	0.241668
ENSG00000137960.5	0.0220247	0.575156
ENSG00000137976.7	0.160968	0.754429
ENSG00000137996.11	0.00673395	0.70551
ENSG00000138032.19	-0.00321437	0.864404
ENSG00000138074.13	-0.000801568	0.945689
ENSG00000138075.10	-0.399743	0.621431
ENSG00000138078.14	0.0247365	0.135019
ENSG00000138081.18	-0.0136867	0.404555
ENSG00000138083.4	0.191354	0.175359
ENSG00000138085.15	-0.00457439	0.548848
ENSG00000138092.9	-0.0247431	0.384398
ENSG00000138136.6	0.247485	0.333359
ENSG00000138172.9	0.0155998	0.434043
ENSG00000138175.8	0.0095362	0.545996
ENSG00000138286.13	-0.00066512	0.987632
ENSG00000138375.11	0.00781261	0.778827
ENSG00000138376.9	-0.0104003	0.68854
ENSG00000138400.11	0.267029	0.494438
ENSG00000138413.12	0.00481882	0.228322
ENSG00000138433.14	0.0136068	0.459601
ENSG00000138434.15	-0.000280344	0.878114
ENSG00000138442.8	0.00261601	0.830225
ENSG00000138459.7	0.0188163	0.338
ENSG00000138463.8	0.0190114	0.282513
ENSG00000138496.15	-0.00109029	0.624292
ENSG00000138614.13	-0.00850725	0.661261
ENSG00000138629.14	-0.0145457	0.410827
ENSG00000138640.13	0.0181077	0.603082
ENSG00000138650.8	-0.215237	0.257459
ENSG00000138658.14	-0.0480154	0.45229
ENSG00000138660.10	-0.0221921	0.491094
ENSG00000138668.17	-0.00172017	0.566506
ENSG00000138674.15	-0.00225302	0.474973
ENSG00000138686.8	-0.0122294	0.848343
ENSG00000138696.9	0.0128425	0.654434
ENSG00000138698.13	-0.0077525	0.546921
ENSG00000138756.16	-0.0128635	0.478828
ENSG00000138757.13	0.00239634	0.652465
ENSG00000138760.7	0.00337158	0.142507
ENSG00000138768.13	0.00608526	0.307169
ENSG00000138802.10	-0.00248016	0.835024
ENSG00000138814.15	-0.00363949	0.72119
ENSG00000138823.11	0.510155	0.404295
ENSG00000138867.15	-0.00364528	0.634266
ENSG00000138942.14	-0.0108082	0.499034
ENSG00000139117.12	-0.00550993	0.747614
ENSG00000139151.13	-0.43137	0.83593
ENSG00000139163.14	-0.0013019	0.884506
ENSG00000139180.9	0.00292587	0.757133
ENSG00000139182.12	-0.00396012	0.745421
ENSG00000139187.8	0.184434	0.459894
ENSG00000139192.10	0.00134847	0.878888
ENSG00000139194.6	-0.0237385	0.883841
ENSG00000139197.9	-0.0138431	0.452761
ENSG00000139211.6	0.00695863	0.00909987
ENSG00000139233.5	0.00488395	0.44531
ENSG00000139263.10	-0.000979951	0.858243
ENSG00000139266.5	-0.0437184	0.147997
ENSG00000139323.12	0.00634203	0.892104
ENSG00000139324.10	-0.00385436	0.534341
ENSG00000139343.9	-0.00201558	0.778616
ENSG00000139344.6	-0.0593418	0.496379
ENSG00000139352.3	-0.108594	0.86279
ENSG00000139372.13	-0.00443488	0.791915
ENSG00000139405.14	-0.0403924	0.312595
ENSG00000139428.10	-0.0128614	0.426533
ENSG00000139433.8	-0.000861466	0.290797
ENSG00000139496.14	0.00786759	0.549167
ENSG00000139517.7	-0.00787617	0.617995
ENSG00000139537.9	-0.102903	0.839268
ENSG00000139546.9	-0.028329	0.284025
ENSG00000139579.11	-0.00572926	0.74893
ENSG00000139618.13	0.000952564	0.97398
ENSG00000139625.11	-0.000736793	0.988665
ENSG00000139631.17	-0.0349679	0.344237
ENSG00000139637.12	-0.00954117	0.533617
ENSG00000139644.11	-0.000471011	0.618241
ENSG00000139651.10	-0.0259552	0.265421
ENSG00000139687.12	0.00376226	0.54404
ENSG00000139697.10	-0.00872477	0.416714
ENSG00000139718.9	-0.0144737	0.237124
ENSG00000139725.6	-0.0739428	0.418185
ENSG00000139746.14	0.018668	0.211632
ENSG00000139826.5	0.0257498	0.388796
ENSG00000139842.13	0.00363373	0.601513
ENSG00000139865.15	-0.124365	0.680038
ENSG00000139910.18	0.00754303	0.920873
ENSG00000139946.8	-0.008005	0.804529
ENSG00000139971.14	0.00482855	0.926288
ENSG00000139974.14	0.0514382	0.358147
ENSG00000140006.10	-0.043834	0.362107
ENSG00000140025.14	-0.0477528	0.584076
ENSG00000140044.11	-0.00782156	0.562767
ENSG00000140105.16	9.39743e-05	0.443129
ENSG00000140107.10	1.03461	0.483319
ENSG00000140153.16	-0.0142373	0.702697
ENSG00000140254.11	-0.00159369	0.719686
ENSG00000140262.16	-0.000661797	0.934955
ENSG00000140264.18	-0.000821987	0.415353
ENSG00000140274.12	-0.00237365	0.86544
ENSG00000140279.11	0.00114496	0.323173
ENSG00000140280.12	0.020354	0.612905
ENSG00000140284.9	0.0277694	0.358154
ENSG00000140319.9	0.00214691	0.584636
ENSG00000140382.13	-0.0211676	0.495505
ENSG00000140395.7	-0.00913711	0.656485
ENSG00000140398.12	0.0342931	0.527205
ENSG00000140400.13	-0.0072135	0.715701
ENSG00000140403.11	0.014011	0.0992894
ENSG00000140406.3	0.00625941	0.699571
ENSG00000140463.12	-0.0586217	0.331619
ENSG00000140464.18	-0.000494091	0.729675
ENSG00000140471.15	-0.0470155	0.242344
ENSG00000140521.10	-0.01549	0.199869
ENSG00000140526.15	0.00208587	0.444486
ENSG00000140527.13	-2.83651	0.167331
ENSG00000140598.12	-0.0150035	0.374804
ENSG00000140623.12	-4.03889	0.336454
ENSG00000140632.15	-0.00674164	0.416811
ENSG00000140682.17	0.00587711	0.542621
ENSG00000140694.15	-0.0213647	0.237642
ENSG00000140718.17	-0.0127269	0.375482
ENSG00000140740.9	0.001886	0.614796
ENSG00000140743.6	0.0119898	0.474106
ENSG00000140750.15	-0.000727993	0.956129
ENSG00000140795.11	0.0713016	0.0205913
ENSG00000140829.10	-0.0156341	0.191147
ENSG00000140830.7	-0.0454826	0.362368
ENSG00000140832.8	-0.0766484	0.0381023
ENSG00000140836.13	-0.0116203	0.551428
ENSG00000140839.10	0.53518	0.041141
ENSG00000140848.15	-0.00994089	0.478159
ENSG00000140943.15	-0.00425275	0.569791
ENSG00000140948.10	-0.0189022	0.168196
ENSG00000140987.18	-0.0782667	0.813932
ENSG00000140988.14	-0.000361597	0.413007
ENSG00000140993.9	-0.245154	0.280852
ENSG00000141012.11	-0.0147366	0.268884
ENSG00000141013.13	-0.00900556	0.829895
ENSG00000141027.19	-0.0091537	0.140291
ENSG00000141034.8	-0.0633187	0.051393
ENSG00000141084.9	-0.0140744	0.44301
ENSG00000141258.11	-0.0182322	0.2601
ENSG00000141294.8	-0.397367	0.433757
ENSG00000141367.10	-7.80165e-05	0.949902
[truncated: 4,049 more rows]

## Sheet: BG.DFI.KIRC
Gene	Coefficient	Logrank p-value
ENSG00000000419.11	-0.0122207	0.646867
ENSG00000001561.6	-0.00403949	0.694556
ENSG00000001629.8	0.00405161	0.43624
ENSG00000001631.13	-0.00998941	0.643066
ENSG00000002016.15	-0.138288	0.151822
ENSG00000002933.6	0.00101673	0.108064
ENSG00000003056.6	0.0107581	0.172018
ENSG00000003147.16	-0.0334655	0.373112
ENSG00000003249.12	0.00315505	0.747631
ENSG00000003509.14	-0.0443448	0.577831
ENSG00000004139.12	0.0842612	0.0881334
ENSG00000004142.10	0.00401754	0.425191
ENSG00000004455.15	0.00295782	0.512715
ENSG00000004478.7	-0.00192296	0.757748
ENSG00000004700.14	0.0168449	0.308969
ENSG00000004776.10	0.00215195	0.937113
ENSG00000004799.7	6.12634e-05	0.779732
ENSG00000004961.13	-0.0143764	0.442815
ENSG00000005001.8	-0.181917	0.462122
ENSG00000005022.5	-0.000582464	0.535995
ENSG00000005073.5	0.0816088	0.227996
ENSG00000005100.11	0.0537852	0.221547
ENSG00000005156.10	-0.0189364	0.737639
ENSG00000005175.8	0.00379428	0.931074
ENSG00000005194.13	-0.00287807	0.83132
ENSG00000005206.15	-0.00905429	0.553902
ENSG00000005448.15	0.000148178	0.982753
ENSG00000005469.10	0.00090652	0.969868
ENSG00000005483.18	0.00736111	0.350661
ENSG00000005513.9	-0.341457	0.361956
ENSG00000005812.9	0.00301395	0.663242
ENSG00000005884.16	0.000261491	0.63719
ENSG00000005889.14	-0.0219471	0.270732
ENSG00000006016.9	-0.0762957	0.439996
ENSG00000006118.13	0.00377234	0.576862
ENSG00000006125.15	0.00454965	0.0735235
ENSG00000006432.14	-0.0970692	0.256163
ENSG00000006459.9	-0.00567797	0.782909
ENSG00000006530.14	0.00992997	0.686369
ENSG00000006576.15	0.00269041	0.929647
ENSG00000006634.6	-0.115598	0.307378
ENSG00000006638.10	0.00509557	0.874271
ENSG00000006695.9	0.0473801	0.292199
ENSG00000006712.13	0.017379	0.192271
ENSG00000006740.15	0.00233877	0.921589
ENSG00000006747.13	-0.00180367	0.428527
ENSG00000006837.10	0.102537	0.806626
ENSG00000007001.11	0.128002	0.320193
ENSG00000007255.9	-0.00926018	0.647912
ENSG00000007350.15	-1.67579	0.276971
ENSG00000007376.6	-0.00676131	0.817258
ENSG00000007384.14	0.0111143	0.58979
ENSG00000007520.3	0.00746647	0.393588
ENSG00000007545.14	-0.0458029	0.428743
ENSG00000008018.8	-0.000270646	0.946808
ENSG00000008128.21	-0.492893	0.00735066
ENSG00000008300.13	-0.111867	0.52367
ENSG00000008382.14	0.0101826	0.622739
ENSG00000008405.10	-0.0408682	0.210295
ENSG00000008735.13	0.0275489	0.641
ENSG00000008869.10	0.0322087	0.0637425
ENSG00000008952.15	0.000274331	0.896417
ENSG00000008988.8	-0.000243156	0.686267
ENSG00000009413.14	0.00554064	0.710941
ENSG00000009830.10	0.0305487	0.351402
ENSG00000010030.12	-0.0090815	0.792365
ENSG00000010072.14	-0.0208265	0.810585
ENSG00000010244.15	-0.00277952	0.802209
ENSG00000010282.13	-0.0265747	0.630265
ENSG00000010292.11	0.0362703	0.0488648
ENSG00000010318.18	-0.167598	0.324026
ENSG00000010361.12	0.00555491	0.848483
ENSG00000010671.14	-0.0285367	0.564818
ENSG00000010803.15	0.0113383	0.4435
ENSG00000011021.20	0.0138371	0.577126
ENSG00000011028.12	0.0012039	0.827125
ENSG00000011114.13	-0.00166235	0.893765
ENSG00000011132.10	0.0412772	0.404561
ENSG00000011258.14	0.0239294	0.378617
ENSG00000011260.12	-0.0251381	0.454562
ENSG00000011295.14	0.00631709	0.74636
ENSG00000011405.12	-0.00249514	0.678816
ENSG00000011426.9	0.0314356	0.0940487
ENSG00000011478.10	0.0205314	0.605946
ENSG00000011566.13	-0.00590877	0.667808
ENSG00000012048.18	-0.00216342	0.976696
ENSG00000012171.16	0.00255285	0.583721
ENSG00000012660.12	0.0010669	0.899269
ENSG00000012963.12	0.0123675	0.468485
ENSG00000013016.13	0.0235597	0.126569
ENSG00000013364.17	0.00186457	0.0899953
ENSG00000013375.14	0.0126403	0.533385
ENSG00000013392.7	0.0249616	0.584169
ENSG00000013523.8	-0.0387312	0.25503
ENSG00000013563.12	0.0167657	0.421896
ENSG00000013573.15	-0.017964	0.597047
ENSG00000013583.7	-0.00576864	0.679358
ENSG00000013810.17	-0.00101623	0.974545
ENSG00000014123.9	0.00896648	0.292946
ENSG00000014164.6	0.0166369	0.522045
ENSG00000015133.17	-0.0136985	0.5666
ENSG00000015153.13	-0.0233361	0.391028
ENSG00000015479.16	-0.106013	0.247833
ENSG00000016391.9	0.00884378	0.100297
ENSG00000018189.11	-0.00999028	0.407641
ENSG00000018510.11	0.00405502	0.553124
ENSG00000018869.15	-0.505469	0.0593766
ENSG00000020129.14	0.0313246	0.279507
ENSG00000020922.11	-0.000816655	0.983327
ENSG00000021826.13	-0.0103869	0.808995
ENSG00000022840.14	0.00347016	0.35925
ENSG00000023041.10	0.00332066	0.865097
ENSG00000023228.12	-5.46708e-05	0.989862
ENSG00000023318.7	-0.0026003	0.780615
ENSG00000023734.9	-0.00124375	0.832899
ENSG00000024526.15	0.116248	0.185862
ENSG00000024862.15	0.00838843	0.597319
ENSG00000025423.10	-0.139567	0.715234
ENSG00000025434.17	0.00281217	0.823945
ENSG00000025770.17	-0.0157316	0.390633
ENSG00000025796.12	0.00904685	0.258313
ENSG00000026103.18	-0.00532451	0.714129
ENSG00000026508.15	-0.00127887	0.526664
ENSG00000027001.8	0.0106084	0.583056
ENSG00000028203.16	0.0162091	0.191909
ENSG00000028310.16	0.0148159	0.646941
ENSG00000028528.13	0.0117355	0.302551
ENSG00000029364.10	-0.00209759	0.751297
ENSG00000030419.15	0.00373956	0.911778
ENSG00000031691.6	-0.0279495	0.700966
ENSG00000031823.13	0.0181347	0.447311
ENSG00000032219.17	0.00382084	0.819589
ENSG00000032742.16	0.0143202	0.595581
ENSG00000033011.10	0.0320378	0.269048
ENSG00000033030.12	0.0180803	0.62387
ENSG00000033178.11	-0.0279009	0.179129
ENSG00000034533.10	0.116601	0.302103
ENSG00000034693.13	-0.0205321	0.521574
ENSG00000036672.14	-0.00771306	0.408976
ENSG00000037241.6	0.0181338	0.490565
ENSG00000037474.13	0.00270721	0.883677
ENSG00000037637.9	0.0291784	0.527459
ENSG00000037749.10	0.0127779	0.417472
ENSG00000037897.15	0.00345638	0.909806
ENSG00000038219.11	0.00655141	0.497886
ENSG00000039123.14	0.0125759	0.246232
ENSG00000039600.9	0.958912	0.0898418
ENSG00000039650.8	-0.0255775	0.373679
ENSG00000040487.11	-0.0212294	0.606196
ENSG00000040531.13	0.0207903	0.644337
ENSG00000041880.13	-0.00417085	0.829503
ENSG00000042088.12	0.0745462	0.267251
ENSG00000042429.9	0.0235715	0.579163
ENSG00000042445.12	0.00567231	0.265056
ENSG00000042493.14	-0.000305921	0.889391
ENSG00000044574.7	0.00032376	0.676684
ENSG00000046604.11	-0.000762854	0.574367
ENSG00000046651.13	-0.0456276	0.0727357
ENSG00000047056.13	0.0318406	0.382234
ENSG00000047365.10	-0.00891255	0.663539
ENSG00000047410.12	0.00958185	0.0960989
ENSG00000047578.11	0.0101002	0.759257
ENSG00000047621.10	-0.0568558	0.240492
ENSG00000048162.18	0.0120615	0.651744
ENSG00000048392.10	-0.00127349	0.8581
ENSG00000048471.12	0.00515544	0.317174
ENSG00000048649.12	0.0125595	0.273905
ENSG00000048991.15	0.0363699	0.323473
ENSG00000049130.12	-0.0099429	0.281716
ENSG00000049167.12	-0.0453336	0.618216
ENSG00000049618.20	0.0149218	0.233833
ENSG00000049883.13	0.075698	0.116148
ENSG00000050130.16	-0.00370475	0.838466
ENSG00000050327.13	0.0862999	0.0315936
ENSG00000051009.9	-0.0173302	0.40038
ENSG00000051128.17	0.00171087	0.876514
ENSG00000051180.15	-0.154438	0.539605
ENSG00000051620.9	-0.0017168	0.824594
ENSG00000052749.12	0.00347459	0.868021
ENSG00000052841.13	0.00413599	0.7471
ENSG00000053371.11	0.00639516	0.232613
ENSG00000053372.4	0.0082898	0.706671
ENSG00000053770.10	-0.0147283	0.34585
ENSG00000054116.10	0.00549485	0.669949
ENSG00000054267.19	0.0119051	0.471707
ENSG00000054282.14	0.0459103	0.279332
ENSG00000054611.12	0.00823965	0.613466
ENSG00000054690.12	-0.0449703	0.135428
ENSG00000055070.15	0.0121428	0.178041
ENSG00000055130.14	0.00285332	0.852596
ENSG00000055147.16	0.0352868	0.158534
ENSG00000055163.17	0.00295669	0.0754749
ENSG00000055609.16	0.000657417	0.916339
ENSG00000055950.15	0.00196911	0.76819
ENSG00000056736.8	0.00720884	0.166117
ENSG00000057019.14	-0.00185564	0.622078
ENSG00000057757.8	-0.0207442	0.504741
ENSG00000057935.12	0.0409911	0.0246375
ENSG00000058063.14	0.00650507	0.50146
ENSG00000058272.14	-0.00433863	0.735354
ENSG00000059377.14	0.00912861	0.634124
ENSG00000059769.18	-0.100563	0.167634
ENSG00000060069.15	-0.0278304	0.454405
ENSG00000060491.15	0.00389879	0.723208
ENSG00000060688.11	-0.0202771	0.658437
ENSG00000060762.17	-0.0208639	0.171226
ENSG00000060982.13	-0.000579584	0.962823
ENSG00000061794.11	-0.00247454	0.644769
ENSG00000061938.15	-0.0148489	0.403331
ENSG00000062485.17	0.000346869	0.889742
ENSG00000062650.16	-0.00576606	0.674301
ENSG00000062716.9	-0.0025069	0.411875
ENSG00000062725.8	0.00145269	0.929459
ENSG00000063169.9	-0.034644	0.596682
ENSG00000063176.14	0.00421325	0.92897
ENSG00000063177.11	1.89486e-05	0.977586
ENSG00000063245.13	0.00154434	0.538054
ENSG00000063322.12	0.0191673	0.129313
ENSG00000063854.11	0.00140343	0.885957
ENSG00000064102.13	0.0330017	0.255042
ENSG00000064225.11	-0.0190813	0.46038
ENSG00000064393.14	0.000601634	0.419195
ENSG00000064419.12	0.0276741	0.0635652
ENSG00000064489.20	-1.38956	0.336708
ENSG00000064490.12	-0.00057505	0.948667
ENSG00000064607.15	-0.0298712	0.154439
ENSG00000064651.12	0.00432863	0.652802
ENSG00000064692.17	-0.0385948	0.693631
ENSG00000064703.10	-0.00926933	0.861218
ENSG00000064726.8	-0.00504615	0.656516
ENSG00000064763.9	0.0441461	0.174937
ENSG00000064933.15	-0.0860545	0.288702
ENSG00000065000.14	0.00470367	0.383698
ENSG00000065057.6	-0.00984861	0.713506
ENSG00000065183.14	0.0406142	0.070622
ENSG00000065243.17	-0.00569452	0.697441
ENSG00000065308.4	0.0064821	0.495699
ENSG00000065325.11	0.116521	0.00724426
ENSG00000065413.15	-0.0531276	0.0947947
ENSG00000065427.13	0.0169904	0.0401962
ENSG00000065491.8	-0.0358917	0.29917
ENSG00000065526.9	-0.00310883	0.600291
ENSG00000065559.13	0.00599254	0.800854
ENSG00000065621.13	-0.0391311	0.280129
ENSG00000065675.13	0.0208109	0.527714
ENSG00000065883.13	-0.00598468	0.744389
ENSG00000065911.10	-0.00687341	0.663546
ENSG00000066044.12	0.0100856	0.479196
ENSG00000066136.18	0.0556866	0.085808
ENSG00000066185.11	-0.0289341	0.793467
ENSG00000066230.9	0.00781322	0.450369
ENSG00000066248.13	0.00552276	0.820844
ENSG00000066557.5	0.00353777	0.88998
ENSG00000066735.13	0.00383323	0.828498
ENSG00000066739.10	-0.0026667	0.857915
ENSG00000066777.7	-0.00635589	0.463237
ENSG00000066923.16	-0.168402	0.216436
ENSG00000067057.15	0.00290764	0.0049207
ENSG00000067064.9	-0.0184283	0.382683
ENSG00000067167.6	-0.000255066	0.864249
ENSG00000067221.12	-0.00329339	0.898344
ENSG00000067248.8	0.00744804	0.632735
ENSG00000067369.12	-0.00227505	0.888769
ENSG00000067560.9	0.000539607	0.796554
ENSG00000067601.7	0.0156061	0.920171
ENSG00000067606.14	0.0321384	0.0309901
ENSG00000067646.10	0.0137621	0.507726
ENSG00000068024.15	-0.0137461	0.79129
ENSG00000068028.16	-0.0572815	0.15952
ENSG00000068097.13	0.0546373	0.228107
ENSG00000068489.11	0.0673688	0.0850865
ENSG00000068650.17	0.00227553	0.0613439
ENSG00000068654.14	0.0219991	0.202149
ENSG00000068697.6	0.00373808	0.0237586
ENSG00000068878.13	-0.0107277	0.577077
ENSG00000068885.13	0.00880296	0.835573
ENSG00000068903.18	0.0194081	0.115202
ENSG00000068912.12	0.000339076	0.961507
ENSG00000068971.12	0.00104292	0.969154
ENSG00000069011.14	0.104526	0.0157645
ENSG00000069248.11	0.0322181	0.056343
ENSG00000069329.14	0.00991585	0.0392021
ENSG00000069345.10	-0.00253911	0.755467
ENSG00000069812.10	-0.272005	0.200247
ENSG00000069943.8	0.0892175	0.0772044
ENSG00000069974.14	-0.022321	0.420525
ENSG00000070010.17	-0.0258496	0.239139
ENSG00000070061.13	-0.0232304	0.281989
ENSG00000070081.14	0.000322427	0.954823
ENSG00000070087.12	-0.0014949	0.524538
ENSG00000070193.4	-2.97757	0.391316
ENSG00000070366.12	0.0345882	0.151433
ENSG00000070367.14	-0.00497253	0.640874
ENSG00000070413.17	0.00401523	0.457187
ENSG00000070423.16	0.0102021	0.681404
ENSG00000070495.13	-0.00503146	0.831652
ENSG00000070610.13	-0.00838772	0.360887
ENSG00000070614.13	0.00477721	0.0969426
ENSG00000070718.10	0.0377308	0.309193
ENSG00000070761.6	0.0509404	0.0713214
ENSG00000070770.7	0.0213128	0.020091
ENSG00000070961.13	0.000180408	0.987406
ENSG00000071082.9	0.00052262	0.424493
ENSG00000071189.20	-0.00644082	0.434103
ENSG00000071246.9	-0.00167546	0.835362
ENSG00000071462.10	0.00270969	0.775969
ENSG00000071539.12	0.0967503	0.243908
ENSG00000071553.15	0.00119481	0.596151
ENSG00000071794.14	0.00617682	0.647601
ENSG00000071894.13	-0.00272155	0.839686
ENSG00000072110.12	0.00472041	0.0213618
ENSG00000072364.11	0.00438736	0.150123
ENSG00000072501.16	0.00185481	0.796914
ENSG00000072571.18	0.0847347	0.211361
ENSG00000072682.17	0.00483691	0.145097
ENSG00000072756.15	-0.0946657	0.19685
ENSG00000072849.9	-0.0016461	0.918114
ENSG00000072864.11	0.0245915	0.597224
ENSG00000072954.5	-0.0183517	0.497824
ENSG00000073111.12	0.0454273	0.0527541
ENSG00000073169.12	-0.0648675	0.139861
ENSG00000073331.16	-0.00973469	0.773042
ENSG00000073578.15	0.00120537	0.443783
ENSG00000073584.17	0.015656	0.260152
ENSG00000073598.5	5.88191	0.151971
ENSG00000073614.10	0.0033754	0.750773
ENSG00000073756.10	0.00267226	0.687831
ENSG00000073803.12	0.0125988	0.385478
ENSG00000073910.18	0.00815108	0.420041
ENSG00000074054.16	0.0311739	0.00567314
ENSG00000074071.12	-0.00174229	0.794748
ENSG00000074219.12	-0.0167665	0.484888
ENSG00000074317.9	-0.00984993	0.911872
ENSG00000074582.11	-0.0233924	0.549848
ENSG00000074621.12	0.0158727	0.60668
ENSG00000074695.5	0.00142388	0.441377
ENSG00000074755.13	0.00165458	0.904502
ENSG00000074800.12	0.000331086	0.0858958
ENSG00000074803.16	0.00982235	0.121659
ENSG00000074855.9	-0.0422849	0.469365
ENSG00000074935.12	-0.17589	0.00470751
ENSG00000075089.8	0.0159649	0.583126
ENSG00000075131.8	-0.256673	0.160775
ENSG00000075188.7	0.00421392	0.917067
ENSG00000075218.17	0.0830115	0.491382
ENSG00000075239.12	-0.000846727	0.517444
ENSG00000075303.11	-0.00615606	0.633571
ENSG00000075336.10	-0.0145501	0.676712
ENSG00000075391.15	-0.000153202	0.989974
ENSG00000075399.11	-0.043441	0.252626
ENSG00000075643.5	-0.0093856	0.736181
ENSG00000075702.15	-0.147627	0.478401
ENSG00000075790.9	0.00390932	0.710462
ENSG00000075914.11	-0.0356079	0.365606
ENSG00000076053.9	0.00978557	0.619614
ENSG00000076201.13	0.00156532	0.901513
ENSG00000076242.13	-0.0141006	0.628028
ENSG00000076382.15	-0.00436778	0.799001
ENSG00000076513.15	0.00828018	0.00329044
ENSG00000076604.13	-0.0200725	0.271482
ENSG00000076924.10	0.0010875	0.885055
ENSG00000076944.13	0.00412746	0.771901
ENSG00000076984.16	0.0218296	0.391499
ENSG00000077235.16	0.00343557	0.729797
ENSG00000077238.12	-0.00648383	0.468326
ENSG00000077312.7	0.00379452	0.701525
ENSG00000077348.7	0.0209594	0.300775
ENSG00000077458.11	-0.0294706	0.607695
ENSG00000077463.13	-0.0074653	0.833272
ENSG00000077514.7	0.0857207	0.000849122
ENSG00000077935.15	-0.15946	0.74517
ENSG00000078114.17	0.00150263	0.797588
ENSG00000078177.12	-0.0162972	0.735162
ENSG00000078246.14	0.0364925	0.122157
ENSG00000078369.16	0.00434118	0.106461
ENSG00000078487.16	-0.0321547	0.745291
ENSG00000078808.15	0.00594418	0.152306
ENSG00000078900.13	-0.296678	0.323657
ENSG00000078902.14	0.00212743	0.739977
ENSG00000078967.11	0.0155269	0.404119
ENSG00000079134.10	-0.110065	0.0285768
ENSG00000079739.14	0.0102049	0.0171038
ENSG00000080007.7	0.0528645	0.534981
ENSG00000080189.13	0.000328001	0.98235
ENSG00000080298.14	-0.0112795	0.793053
ENSG00000080546.12	0.00444353	0.77207
ENSG00000080603.15	0.000529302	0.933582
ENSG00000080822.15	-0.001715	0.837209
ENSG00000080824.17	-0.000626078	0.50543
ENSG00000080839.10	-0.0379134	0.611946
ENSG00000080986.11	0.042673	0.696528
ENSG00000081014.9	-0.0455567	0.43713
ENSG00000081019.12	0.0161757	0.388469
ENSG00000081052.11	-0.0129304	0.421396
ENSG00000081087.13	0.00235639	0.727756
ENSG00000081870.10	0.00386993	0.931568
ENSG00000082213.16	0.0244147	0.502378
ENSG00000082258.11	-0.0296595	0.218507
ENSG00000082641.14	0.00232597	0.0208544
ENSG00000082701.13	0.0153721	0.118654
ENSG00000082805.18	0.0150923	0.107738
ENSG00000083093.8	0.0912274	0.230957
ENSG00000083290.18	0.0324177	0.332411
ENSG00000083307.9	-0.0136739	0.654353
ENSG00000083312.16	0.00462405	0.422238
ENSG00000083520.13	0.0169024	0.340332
ENSG00000083535.14	0.0102825	0.82536
ENSG00000083635.7	0.218279	0.0891677
ENSG00000083720.11	-0.00401692	0.531308
ENSG00000083799.16	0.000673765	0.943432
ENSG00000083817.8	-0.0292183	0.815589
ENSG00000083937.7	0.00490357	0.684316
ENSG00000084072.15	0.025399	0.151309
ENSG00000084073.7	0.00798163	0.142708
ENSG00000084090.12	0.000253854	0.962901
ENSG00000084110.9	-0.166254	0.756901
ENSG00000084463.6	0.00924732	0.239243
ENSG00000084623.10	0.0028355	0.420172
ENSG00000085231.12	0.0442799	0.166235
ENSG00000085365.16	-0.000264135	0.951991
ENSG00000085382.10	0.0280382	0.497273
ENSG00000085491.14	0.00756617	0.482064
ENSG00000085511.18	0.0128724	0.70578
ENSG00000085721.11	0.0054913	0.713528
ENSG00000085733.14	0.00237914	0.583021
ENSG00000085840.11	0.094856	0.657291
ENSG00000085872.13	0.017474	0.44694
ENSG00000086061.14	-0.00261316	0.537543
ENSG00000086062.11	0.00186506	0.142804
ENSG00000086065.12	-0.00120227	0.807288
ENSG00000086189.8	0.00403464	0.508016
ENSG00000086200.15	0.00440165	0.803608
ENSG00000086598.9	0.00160647	0.557705
ENSG00000087206.15	0.0522546	0.293679
ENSG00000087258.12	-0.0170518	0.800504
ENSG00000087263.15	-0.0108866	0.685834
ENSG00000087269.14	0.0164442	0.583698
ENSG00000087299.10	-0.0628469	0.124431
ENSG00000087301.7	0.0067193	0.789446
ENSG00000087586.16	0.0247332	0.724699
ENSG00000087884.13	-0.00136369	0.923916
ENSG00000088448.13	-0.0241582	0.122504
ENSG00000088682.12	-0.00139555	0.725112
ENSG00000088727.11	-0.010645	0.853115
ENSG00000088756.11	0.00700444	0.771286
ENSG00000088766.10	-0.00593517	0.501248
ENSG00000088808.15	-0.029629	0.193246
ENSG00000088836.11	-0.440901	0.225728
ENSG00000088930.7	0.000453345	0.945377
ENSG00000088986.9	0.00186753	0.678323
ENSG00000088992.16	-0.000174396	0.988511
ENSG00000089006.15	0.00334169	0.559604
ENSG00000089009.14	0.00123227	0.205639
ENSG00000089022.12	-0.0723799	0.145608
ENSG00000089048.13	0.034979	0.332051
ENSG00000089053.11	-0.0020114	0.826171
ENSG00000089060.10	0.00371559	0.886773
ENSG00000089091.15	-0.0411659	0.613617
ENSG00000089094.15	-0.0285131	0.474635
ENSG00000089157.14	0.000157688	0.500836
ENSG00000089195.13	-0.0301167	0.570682
ENSG00000089220.4	0.000955336	0.253215
ENSG00000089225.18	-0.290857	0.580268
ENSG00000089234.14	0.039956	0.307153
ENSG00000089248.6	0.000279553	0.944299
ENSG00000089250.17	-0.0373757	0.740293
ENSG00000089335.19	-0.00408927	0.888162
ENSG00000089505.16	-0.244146	0.63453
ENSG00000089737.14	-0.000698157	0.890374
ENSG00000089818.15	-0.00248272	0.908774
ENSG00000089847.11	-0.116932	0.381669
ENSG00000089876.10	0.00364613	0.86184
ENSG00000090013.8	0.0014413	0.856032
ENSG00000090060.16	-0.00318651	0.559459
ENSG00000090061.16	-0.0461479	0.603411
ENSG00000090238.10	0.00513672	0.585988
ENSG00000090273.12	0.001114	0.803677
ENSG00000090372.13	0.00838212	0.552536
ENSG00000090581.8	0.0038917	0.554865
ENSG00000090861.14	0.00184263	0.641676
ENSG00000090889.11	0.0902212	0.239339
ENSG00000091157.12	0.00335658	0.9009
ENSG00000091164.11	-0.0045748	0.634207
ENSG00000091181.18	-1.6013	0.374918
ENSG00000091262.13	0.0146732	0.0350793
ENSG00000091428.16	-0.00863544	0.615081
ENSG00000091640.6	0.00139884	0.906371
ENSG00000091651.7	-0.463814	0.207397
ENSG00000092020.9	-0.0786081	0.12052
ENSG00000092094.9	-0.0886053	0.0698406
ENSG00000092098.15	-0.0183334	0.668023
ENSG00000092201.8	0.00281396	0.763479
ENSG00000092203.12	-0.000232955	0.982993
ENSG00000092421.15	0.00671437	0.0700779
ENSG00000092531.8	0.0131365	0.479188
ENSG00000092841.17	-0.000205833	0.695839
ENSG00000092964.15	0.00885494	0.0100323
ENSG00000092969.10	0.0279916	0.331562
ENSG00000092978.9	0.00700847	0.886835
ENSG00000093000.17	-0.0159554	0.401131
ENSG00000093009.8	-0.140196	0.515061
ENSG00000093010.10	0.00614253	0.396847
ENSG00000093183.12	-0.0133693	0.550329
ENSG00000094916.12	0.0102425	0.022831
ENSG00000095139.12	0.00261666	0.505583
ENSG00000095319.13	-0.00284029	0.895618
ENSG00000095321.15	0.00413679	0.568442
ENSG00000095574.10	-0.00752678	0.770448
ENSG00000095777.13	0.00928163	0.799324
ENSG00000095787.20	0.00707292	0.255456
ENSG00000095794.18	0.00118618	0.929032
ENSG00000096070.18	0.0255518	0.037327
ENSG00000096696.12	0.00194955	0.326544
ENSG00000096872.14	0.00694873	0.910426
ENSG00000097021.18	0.00942814	0.100925
ENSG00000097033.13	0.00605118	0.142953
ENSG00000099194.5	0.000871249	0.0294217
ENSG00000099203.5	0.00259837	0.92414
ENSG00000099256.17	0.0244914	0.775673
ENSG00000099290.14	0.0272703	0.351986
ENSG00000099326.7	-0.0565581	0.173522
ENSG00000099331.12	0.000299596	0.969163
ENSG00000099364.15	0.0179769	0.551887
ENSG00000099381.15	0.0124791	0.520385
ENSG00000099625.11	-0.300177	0.471782
ENSG00000099715.13	-0.0969455	0.890226
ENSG00000099783.10	0.00303271	0.530562
ENSG00000099840.12	-0.394742	0.258609
ENSG00000099849.13	-0.011954	0.386674
ENSG00000099889.12	-0.0493899	0.21862
ENSG00000099910.15	-0.0241977	0.477905
ENSG00000099917.16	0.00272199	0.739265
ENSG00000099940.10	0.0360246	0.256021
ENSG00000099953.8	-0.00408847	0.818091
ENSG00000099968.16	-0.00316565	0.692306
ENSG00000099977.12	-0.00263559	0.850752
ENSG00000099984.9	0.943122	0.812711
ENSG00000099995.17	0.011421	0.149479
ENSG00000100014.18	0.00821182	0.712196
ENSG00000100024.13	0.0105173	0.280585
ENSG00000100028.10	0.00394158	0.753516
ENSG00000100029.16	0.00758002	0.350495
ENSG00000100077.13	-0.0339404	0.349647
ENSG00000100084.13	0.0118095	0.845386
ENSG00000100099.19	0.0032837	0.843576
ENSG00000100100.11	-0.00219464	0.70642
ENSG00000100104.11	0.0525005	0.371579
ENSG00000100105.16	0.0179076	0.231047
ENSG00000100109.15	-0.00122662	0.942798
ENSG00000100121.11	-0.945882	0.64566
ENSG00000100124.11	-0.00814813	0.831636
ENSG00000100129.16	0.000787729	0.807862
ENSG00000100209.8	-0.0487893	0.400336
ENSG00000100211.9	-0.0102247	0.724574
ENSG00000100216.5	-0.00560534	0.536501
ENSG00000100218.10	-0.0117124	0.888449
ENSG00000100227.16	0.0150533	0.224988
ENSG00000100228.11	0.0236942	0.181455
ENSG00000100258.16	0.0016657	0.819772
ENSG00000100263.12	-0.046239	0.37232
ENSG00000100284.19	-0.00408871	0.612296
ENSG00000100288.18	-0.489197	0.0112278
ENSG00000100312.9	0.913201	0.176123
ENSG00000100314.3	-6.14035	0.0385045
ENSG00000100319.12	-0.00553375	0.87953
ENSG00000100345.19	0.000708769	0.0753336
ENSG00000100354.19	-0.00947935	0.493387
ENSG00000100380.11	0.00203805	0.343371
ENSG00000100410.6	-0.0334637	0.372399
ENSG00000100412.14	0.00242807	0.285521
ENSG00000100418.7	-0.0160178	0.317473
ENSG00000100439.9	0.0121802	0.334904
ENSG00000100442.9	-0.0197364	0.415101
ENSG00000100461.16	-0.00766364	0.56208
ENSG00000100462.14	0.0125048	0.377863
ENSG00000100523.13	-0.0698966	0.146262
ENSG00000100554.10	-0.00415789	0.466715
ENSG00000100565.14	-3.22203	0.470401
ENSG00000100575.12	-0.0115966	0.681317
ENSG00000100577.17	-0.0409262	0.270068
ENSG00000100578.13	-0.004871	0.930167
ENSG00000100580.7	0.00368675	0.719731
ENSG00000100583.4	0.252145	0.144454
ENSG00000100591.6	-0.00998545	0.45025
ENSG00000100601.8	-0.0337349	0.651267
ENSG00000100603.12	0.0277974	0.181697
ENSG00000100632.9	-0.00842858	0.512459
ENSG00000100644.15	-0.0016004	0.587503
ENSG00000100697.13	-0.00557611	0.595354
ENSG00000100711.12	-0.00837381	0.6557
ENSG00000100731.14	-0.00073621	0.934254
ENSG00000100744.13	-0.0316749	0.35727
ENSG00000100784.8	-0.008265	0.846208
ENSG00000100811.9	0.00767903	0.405709
ENSG00000100813.13	-0.00945912	0.2545
ENSG00000100823.10	0.00708065	0.168403
ENSG00000100852.11	-0.00381658	0.467464
ENSG00000100865.13	-0.0115407	0.692762
ENSG00000100883.10	-0.00566404	0.688782
ENSG00000100890.14	-0.2274	0.237937
ENSG00000100897.16	0.0010493	0.911589
ENSG00000100911.12	-0.0065829	0.311022
ENSG00000100916.12	-0.0654527	0.326002
ENSG00000100938.16	0.00606511	0.528461
ENSG00000100941.7	-0.0124683	0.25663
ENSG00000101076.15	0.00958747	0.000728778
ENSG00000101079.19	0.0153429	0.311731
ENSG00000101109.10	0.0116616	0.357621
ENSG00000101126.14	0.00927733	0.354205
ENSG00000101138.10	0.0404577	0.209323
ENSG00000101144.11	-0.263932	0.460627
ENSG00000101150.16	-0.00136439	0.850326
ENSG00000101182.13	-0.00364803	0.499628
ENSG00000101187.14	-0.0307422	0.114327
ENSG00000101191.15	0.00406944	0.75193
ENSG00000101193.7	0.0204569	0.16074
ENSG00000101198.13	-0.0146719	0.510905
ENSG00000101199.11	-0.0145433	0.28076
ENSG00000101216.9	-0.0248947	0.56516
ENSG00000101224.16	0.000600631	0.965127
ENSG00000101246.18	-0.00434788	0.696793
ENSG00000101247.16	-0.0829633	0.253581
ENSG00000101290.12	0.00290045	0.682319
ENSG00000101346.10	0.00356844	0.395157
ENSG00000101365.19	0.00327321	0.688201
ENSG00000101407.11	0.0594211	0.0375038
ENSG00000101413.10	0.00870594	0.762222
ENSG00000101421.3	0.00415419	0.402373
ENSG00000101425.11	0.151676	0.604139
ENSG00000101452.13	-0.0337815	0.663638
ENSG00000101457.11	0.00259959	0.877354
ENSG00000101470.8	-0.519043	0.553981
ENSG00000101473.15	-0.0179972	0.547785
ENSG00000101493.9	0.0071246	0.799411
ENSG00000101546.11	0.0410212	0.309379
ENSG00000101574.13	-0.0662982	0.284877
ENSG00000101596.13	-0.0138842	0.321006
ENSG00000101608.11	0.00146027	0.702367
ENSG00000101639.17	-0.0438822	0.212757
ENSG00000101654.16	0.023038	0.192658
ENSG00000101745.14	-0.00977483	0.445385
ENSG00000101746.14	0.0180461	0.831529
ENSG00000101751.9	-0.0133753	0.558385
ENSG00000101752.10	-0.00403933	0.67962
ENSG00000101843.17	0.0121869	0.471719
ENSG00000101844.16	-0.0271632	0.42696
ENSG00000101850.11	0.00290968	0.774905
ENSG00000101955.13	0.0115715	0.799861
ENSG00000101986.11	0.0395656	0.105883
ENSG00000101997.11	0.0558653	0.146557
ENSG00000102081.12	0.00775637	0.254467
ENSG00000102103.14	-0.00172107	0.884826
ENSG00000102125.14	-0.0329343	0.351569
ENSG00000102312.19	-0.0187328	0.744994
ENSG00000102317.16	0.00149716	0.628947
ENSG00000102393.8	-3.06203e-05	0.99891
ENSG00000102471.12	0.00404398	0.434143
ENSG00000102531.15	0.00236845	0.702974
ENSG00000102547.17	-0.00098574	0.949282
ENSG00000102572.13	0.0240499	0.0361408
ENSG00000102580.13	0.00155951	0.748321
ENSG00000102753.8	0.00189283	0.927603
ENSG00000102755.9	0.000633089	0.31489
ENSG00000102786.13	-0.032635	0.208538
ENSG00000102796.9	0.0339256	0.130911
ENSG00000102871.14	0.0240866	0.0923679
ENSG00000102897.8	0.00527961	0.482527
ENSG00000102900.11	0.0257181	0.443092
ENSG00000102904.13	-0.158103	0.313208
ENSG00000102921.6	0.0116858	0.538975
ENSG00000102974.13	0.021697	0.241265
ENSG00000102977.12	0.0359671	0.365592
ENSG00000102981.8	-0.0427053	0.538264
ENSG00000103005.10	0.00374714	0.83941
ENSG00000103035.9	0.0132368	0.488858
ENSG00000103051.17	0.0134371	0.47433
ENSG00000103061.10	0.0289269	0.878103
ENSG00000103145.9	0.000691971	0.756316
ENSG00000103152.10	0.000963955	0.949703
ENSG00000103160.10	-0.0074385	0.766656
ENSG00000103174.10	0.0459587	0.169931
ENSG00000103197.15	0.00440674	0.751267
ENSG00000103227.17	-0.0245889	0.326652
ENSG00000103248.16	0.0270478	0.722776
ENSG00000103253.16	-0.0261034	0.35052
ENSG00000103266.9	0.00619444	0.6363
ENSG00000103275.17	0.00546655	0.514059
ENSG00000103326.9	-0.00800919	0.564866
ENSG00000103343.11	0.191607	0.0692595
ENSG00000103353.14	0.0248108	0.033054
ENSG00000103356.14	0.00119672	0.937725
ENSG00000103363.13	-0.000575987	0.780275
ENSG00000103423.12	-0.00230566	0.822239
ENSG00000103429.9	0.011763	0.0513864
ENSG00000103494.11	0.0501889	0.148129
ENSG00000103502.12	0.012066	0.019555
ENSG00000103549.20	0.019717	0.0791449
ENSG00000103591.11	-0.0327435	0.200631
ENSG00000103599.18	-0.121348	0.524596
ENSG00000103671.8	-0.00163202	0.966378
ENSG00000103710.9	0.0252391	0.361842
ENSG00000103852.11	-0.0175838	0.703532
ENSG00000103942.11	-0.075797	0.289468
ENSG00000103966.8	0.00683343	0.139244
ENSG00000103978.14	0.0116648	0.219704
ENSG00000103994.15	0.0026225	0.557907
ENSG00000103995.12	-0.122613	0.20195
ENSG00000104043.13	-0.116945	0.172719
ENSG00000104047.13	-0.0847718	0.135993
ENSG00000104064.15	-0.0394766	0.441014
ENSG00000104129.8	-0.0524115	0.485953
ENSG00000104131.11	-0.0019811	0.913414
ENSG00000104140.6	0.0233447	0.438635
ENSG00000104147.7	-0.341864	0.620273
ENSG00000104164.9	0.00227224	0.833914
ENSG00000104228.11	0.0732529	0.024292
ENSG00000104231.9	-0.0111308	0.550904
ENSG00000104299.13	0.0228008	0.60411
ENSG00000104312.7	0.0392968	0.216046
ENSG00000104356.9	0.067942	0.441849
ENSG00000104365.12	-0.0321453	0.251176
ENSG00000104369.4	0.0564756	0.644075
ENSG00000104375.14	-0.016231	0.538882
ENSG00000104381.11	0.0553099	0.353729
ENSG00000104388.13	0.000267585	0.955634
ENSG00000104490.16	-0.0128673	0.461099
ENSG00000104549.10	-0.0215762	0.46924
ENSG00000104643.8	-0.043924	0.262586
ENSG00000104671.6	0.0188177	0.282734
ENSG00000104689.8	0.00596539	0.878754
ENSG00000104714.12	0.00327046	0.94407
ENSG00000104722.12	0.0118771	0.869112
ENSG00000104738.15	0.00669111	0.708409
ENSG00000104756.14	0.00832868	0.446471
ENSG00000104763.16	-5.84129e-05	0.9719
ENSG00000104765.13	0.00313422	0.00730901
ENSG00000104774.11	0.00579106	0.33377
ENSG00000104812.13	0.00985815	0.0435136
ENSG00000104814.11	-0.0350885	0.389453
ENSG00000104825.15	0.00129538	0.957516
ENSG00000104835.13	-0.166139	0.320111
ENSG00000104853.14	0.0129686	0.0384898
ENSG00000104872.9	-0.00609336	0.709252
ENSG00000104880.16	0.0695684	0.526216
ENSG00000104881.13	0.0107264	0.339432
ENSG00000104885.16	-0.0845655	0.0216526
ENSG00000104892.15	-0.0546554	0.662843
ENSG00000104897.8	0.00903025	0.407594
ENSG00000104901.5	-5.44462	0.0889568
ENSG00000104904.11	-0.000763184	0.637152
ENSG00000104907.11	-0.044774	0.200168
ENSG00000104915.13	0.0115774	0.596874
ENSG00000104946.9	0.00397588	0.828313
ENSG00000104951.14	-0.000284076	0.982987
ENSG00000104960.14	-0.00255144	0.710014
ENSG00000104973.13	0.0255005	0.157915
ENSG00000104979.7	-0.000918489	0.882556
ENSG00000104998.3	0.0108599	0.554156
ENSG00000105011.7	-0.0149906	0.800614
ENSG00000105053.9	0.00723714	0.627956
ENSG00000105072.7	0.0363644	0.509477
ENSG00000105127.7	0.0119107	0.422344
ENSG00000105193.7	-0.000115531	0.824842
ENSG00000105220.13	0.00265046	0.00500657
ENSG00000105223.17	0.00215401	0.572986
ENSG00000105248.14	0.0126956	0.707906
ENSG00000105281.11	0.00349811	0.685894
ENSG00000105376.4	-2.25451	0.171278
ENSG00000105392.14	-2.42357	0.437576
ENSG00000105443.12	0.00823939	0.551895
ENSG00000105467.7	-0.23272	0.71621
ENSG00000105479.14	-0.262796	0.538217
ENSG00000105483.15	-0.0219579	0.244099
ENSG00000105486.12	0.0246623	0.30404
ENSG00000105516.9	0.0180579	0.212606
ENSG00000105612.7	0.0058	0.302318
ENSG00000105618.12	0.00260542	0.775362
ENSG00000105619.12	-0.0187326	0.679175
ENSG00000105641.3	-3.55788	0.249551
ENSG00000105649.8	-0.0193624	0.73599
ENSG00000105669.11	-0.00166303	0.719603
ENSG00000105671.10	0.0189687	0.203643
ENSG00000105676.12	-0.0126229	0.683893
ENSG00000105677.10	-0.00160311	0.825439
ENSG00000105696.7	-0.127851	0.63565
ENSG00000105705.14	-0.00553839	0.863493
ENSG00000105723.10	0.0187439	0.211731
ENSG00000105738.9	0.0241532	0.112071
ENSG00000105778.16	0.0108204	0.383699
ENSG00000105810.8	0.0116241	0.108512
ENSG00000105821.13	-0.0067207	0.854974
ENSG00000105825.10	-0.000647179	0.790054
ENSG00000105835.10	0.00168825	0.373296
ENSG00000105879.10	0.00704244	0.695804
ENSG00000105968.17	0.00517948	0.441767
ENSG00000105971.13	0.00287862	0.136058
ENSG00000105982.15	0.025409	0.865646
ENSG00000105991.7	0.241588	0.206945
ENSG00000106028.9	0.00302302	0.7202
ENSG00000106031.7	0.0832731	0.0214809
ENSG00000106080.9	-0.0166972	0.705622
ENSG00000106086.17	-0.0232037	0.621327
ENSG00000106105.12	0.000783912	0.876349
ENSG00000106144.18	0.0751081	0.00865544
ENSG00000106244.11	0.0217246	0.0209076
ENSG00000106245.8	-0.000813149	0.941867
ENSG00000106263.16	0.00165663	0.453335
ENSG00000106266.7	0.0109686	0.572828
ENSG00000106268.14	0.00590598	0.855222
ENSG00000106290.13	0.0272268	0.187316
ENSG00000106299.7	0.00429693	0.256633
ENSG00000106305.8	0.00483318	0.857129
ENSG00000106344.7	-0.00508318	0.883268
ENSG00000106355.8	3.94688e-05	0.998297
ENSG00000106397.10	0.00899399	0.0211781
ENSG00000106400.10	-0.00309104	0.521685
ENSG00000106459.13	-0.143462	0.134002
ENSG00000106524.7	0.00594678	0.702628
ENSG00000106538.8	0.00154147	0.194914
ENSG00000106546.11	0.00865615	0.0914905
ENSG00000106554.10	0.00483986	0.52023
ENSG00000106565.16	0.00185813	0.0262453
ENSG00000106588.9	-0.010466	0.74963
ENSG00000106591.3	-0.00661694	0.645298
ENSG00000106608.15	0.00472651	0.758746
ENSG00000106610.13	-0.0227623	0.494151
ENSG00000106617.12	-0.0058699	0.478692
ENSG00000106692.12	-0.00338392	0.891187
ENSG00000106733.19	-0.00722063	0.726751
ENSG00000106803.8	-0.00672409	0.488769
ENSG00000106993.10	-0.0530105	0.200715
ENSG00000107099.14	-0.00152193	0.77126
ENSG00000107175.9	0.00167573	0.853951
ENSG00000107185.9	0.00380233	0.753485
ENSG00000107262.15	-0.00476515	0.435477
ENSG00000107282.6	0.0316266	0.477794
ENSG00000107362.12	-0.00294979	0.941372
ENSG00000107371.11	-0.144874	0.141025
ENSG00000107485.14	-0.0302127	0.374795
ENSG00000107551.19	0.00186334	0.470111
ENSG00000107560.9	0.00954141	0.554751
ENSG00000107651.11	0.00860146	0.627471
ENSG00000107669.16	0.0069268	0.714049
ENSG00000107758.14	-0.00868141	0.632873
ENSG00000107779.10	0.0240692	0.436051
ENSG00000107796.11	0.000630563	0.447508
ENSG00000107798.16	0.00257539	0.192014
ENSG00000107815.6	0.0220421	0.74284
ENSG00000107819.12	0.0187942	0.0273471
ENSG00000107821.13	-0.0251023	0.835798
ENSG00000107854.5	0.00939168	0.352857
ENSG00000107864.13	-0.0392987	0.48587
ENSG00000107897.17	0.00791993	0.401822
ENSG00000107937.17	-0.0164889	0.617765
ENSG00000107938.16	-0.0386046	0.521908
ENSG00000107949.15	0.00748831	0.718399
ENSG00000107984.8	-0.348497	0.383612
ENSG00000108061.10	0.0081424	0.451334
ENSG00000108107.11	-4.96975e-05	0.922177
ENSG00000108306.10	-0.0328879	0.405725
ENSG00000108312.13	0.00243117	0.773811
ENSG00000108342.11	-15.6337	0.0698051
ENSG00000108379.8	-0.0430593	0.643334
ENSG00000108384.13	0.0812619	0.367248
ENSG00000108395.12	-0.0190656	0.707425
ENSG00000108423.13	-0.0403065	0.620363
ENSG00000108424.8	0.0111626	0.0996944
ENSG00000108433.14	0.00866964	0.834469
ENSG00000108439.8	0.0138704	0.24682
ENSG00000108443.12	0.0119505	0.683803
ENSG00000108469.13	-0.0119826	0.649015
ENSG00000108474.15	-0.236966	0.040745
ENSG00000108509.19	0.00913582	0.638943
ENSG00000108515.16	-0.0795435	0.475675
ENSG00000108518.7	0.00111042	0.385212
ENSG00000108523.14	0.00501185	0.430558
ENSG00000108528.12	-0.000124652	0.978369
ENSG00000108559.10	-0.0258609	0.466913
ENSG00000108590.9	-0.072528	0.591033
ENSG00000108641.13	0.00431242	0.847603
ENSG00000108666.8	-0.00715173	0.812567
ENSG00000108733.8	0.00904356	0.862454
ENSG00000108759.3	-0.733893	0.694529
ENSG00000108773.9	-0.0206121	0.269917
ENSG00000108774.13	0.00668162	0.37455
ENSG00000108798.7	0.0063869	0.748756
ENSG00000108826.14	-0.00500356	0.638963
ENSG00000108828.14	0.00502273	0.00282556
ENSG00000108830.9	0.0455257	0.440195
ENSG00000108839.10	0.10318	0.639358
ENSG00000108883.11	0.0224368	0.086325
ENSG00000109046.13	-0.00677787	0.172858
ENSG00000109062.8	0.00279379	0.206361
ENSG00000109065.10	-0.0548292	0.194099
ENSG00000109066.12	0.00153705	0.959518
ENSG00000109072.12	0.238919	0.0204705
ENSG00000109079.8	0.00486535	0.553713
ENSG00000109083.12	-0.0261245	0.666941
ENSG00000109111.13	0.0120231	0.141656
ENSG00000109113.16	-0.000980965	0.87618
ENSG00000109158.9	-0.245737	0.791519
ENSG00000109189.11	0.046532	0.211783
ENSG00000109320.10	0.00142285	0.890364
ENSG00000109332.18	-0.00183593	0.505792
ENSG00000109339.17	-0.0248717	0.590169
ENSG00000109436.7	-0.00465898	0.490116
ENSG00000109466.12	-0.0086181	0.801785
ENSG00000109475.15	-0.000418695	0.655555
ENSG00000109534.15	0.0187275	0.736855
ENSG00000109536.10	-0.0310901	0.447066
ENSG00000109572.12	0.0029631	0.500831
ENSG00000109586.10	0.00512883	0.813502
ENSG00000109618.10	0.00942724	0.573858
ENSG00000109670.12	-0.147529	0.0284728
ENSG00000109684.13	-0.835337	0.198248
ENSG00000109736.13	0.00941363	0.230857
ENSG00000109771.14	-0.0836292	0.533363
ENSG00000109775.9	0.000898247	0.96422
ENSG00000109787.11	0.00740917	0.513233
ENSG00000109805.8	0.0612177	0.562123
ENSG00000109814.10	0.0117082	0.204227
ENSG00000109832.11	0.29897	0.149326
ENSG00000109911.16	0.0470417	0.218763
ENSG00000110025.11	-1.88099	0.0214728
ENSG00000110031.11	0.00195031	0.939687
ENSG00000110046.11	0.0259381	0.27529
ENSG00000110048.10	0.00377415	0.483834
ENSG00000110060.7	-0.00462373	0.955083
ENSG00000110063.7	-0.011718	0.505729
ENSG00000110074.9	-0.0441888	0.205811
ENSG00000110080.17	-0.00546869	0.597545
ENSG00000110104.10	0.0469399	0.191141
ENSG00000110107.7	0.00647382	0.456783
ENSG00000110108.8	0.0175551	0.00299477
ENSG00000110172.10	-0.104623	0.0226181
ENSG00000110315.5	-0.00490781	0.710493
ENSG00000110321.14	0.00111737	0.297178
ENSG00000110367.10	0.00448082	0.326258
ENSG00000110375.2	-0.0545028	0.905123
ENSG00000110400.9	0.0316149	0.256914
ENSG00000110429.12	0.00259813	0.83651
ENSG00000110435.10	-0.00520463	0.764707
ENSG00000110536.12	-0.0601825	0.335233
ENSG00000110660.13	0.0254872	0.404134
ENSG00000110713.14	0.00157491	0.866543
ENSG00000110717.9	-0.0059046	0.356955
ENSG00000110721.10	-0.133389	0.045957
ENSG00000110756.16	-0.0223174	0.507667
ENSG00000110768.10	0.0113625	0.652759
ENSG00000110844.12	-0.107325	0.279202
ENSG00000110871.13	0.00473117	0.79885
ENSG00000110888.16	-0.0719686	0.150979
ENSG00000110906.11	0.00360867	0.672584
ENSG00000110921.10	0.00638484	0.305525
ENSG00000110944.7	0.466737	0.501786
ENSG00000110987.7	0.00774916	0.670035
ENSG00000111011.16	0.0133909	0.433094
ENSG00000111058.6	-0.00246057	0.558483
ENSG00000111110.10	-0.0145003	0.353278
ENSG00000111199.9	0.0128457	0.124215
ENSG00000111203.10	0.00995952	0.70831
ENSG00000111206.11	0.0714229	0.0620121
ENSG00000111215.10	-1.36572	0.0506254
ENSG00000111231.7	-0.00160781	0.939673
ENSG00000111237.17	-0.00324895	0.734241
ENSG00000111247.13	0.0657111	0.615754
ENSG00000111254.6	0.039925	0.91716
ENSG00000111271.13	-0.0022323	0.870352
ENSG00000111358.12	0.0165605	0.679829
ENSG00000111361.11	0.0563377	0.0473588
ENSG00000111412.5	0.00125711	0.834229
ENSG00000111432.4	0.394067	0.127887
ENSG00000111481.8	0.00516424	0.23948
ENSG00000111540.14	0.00555809	0.225945
ENSG00000111596.10	0.0132526	0.491137
ENSG00000111639.6	0.00388404	0.593211
ENSG00000111640.13	0.000218705	0.00541969
ENSG00000111647.11	0.00089743	0.954323
ENSG00000111653.18	0.0225072	0.292511
ENSG00000111665.10	0.0324528	0.700108
ENSG00000111666.9	-8.60734e-06	0.999168
ENSG00000111667.12	0.00495082	0.289876
ENSG00000111696.10	0.00948941	0.0614668
ENSG00000111707.10	-0.00252743	0.915189
ENSG00000111711.8	-0.0134185	0.408638
ENSG00000111725.9	-0.0019049	0.710732
ENSG00000111727.10	-0.0237091	0.37797
ENSG00000111737.10	0.010117	0.578743
ENSG00000111785.17	-0.00205906	0.967452
ENSG00000111786.7	0.0280931	0.0501503
ENSG00000111790.12	-0.033038	0.121238
ENSG00000111802.12	0.0002858	0.969673
ENSG00000111817.15	-0.00210753	0.882105
ENSG00000111845.4	-0.0355576	0.549984
ENSG00000111877.16	0.0416663	0.436551
ENSG00000111880.14	0.0218948	0.575466
ENSG00000111897.6	0.00182506	0.268218
ENSG00000111913.14	-0.0208752	0.378627
ENSG00000112029.8	-0.0679321	0.65496
ENSG00000112078.12	0.0144999	0.107039
ENSG00000112110.8	0.0088748	0.575866
ENSG00000112237.11	-0.010253	0.408041
ENSG00000112249.12	0.00325384	0.798091
ENSG00000112276.12	0.000925675	0.991466
ENSG00000112282.16	0.0134706	0.556461
ENSG00000112290.11	0.0346698	0.240326
ENSG00000112293.13	-0.206095	0.508162
ENSG00000112294.11	0.00353296	0.711145
ENSG00000112304.9	0.00299643	0.847315
ENSG00000112333.10	-0.0109092	0.883213
ENSG00000112367.9	0.0173184	0.669848
ENSG00000112425.12	-0.0322558	0.724686
ENSG00000112473.15	0.00202978	0.749897
ENSG00000112530.10	-0.0425864	0.511355
ENSG00000112531.15	0.00203713	0.600955
ENSG00000112541.12	0.00641961	0.0690842
ENSG00000112576.11	0.00396668	0.402439
ENSG00000112578.8	0.00895411	0.839336
ENSG00000112592.11	-0.0383911	0.661539
ENSG00000112624.11	0.0224437	0.29289
ENSG00000112697.14	0.00161736	0.533193
ENSG00000112699.9	0.0173636	0.640668
ENSG00000112739.15	-0.0128874	0.411149
ENSG00000112855.13	0.022438	0.338143
ENSG00000112877.7	0.109405	0.581655
ENSG00000112902.10	0.00403554	0.451851
ENSG00000112977.14	0.000436376	0.813696
ENSG00000112983.16	0.021898	0.256238
ENSG00000112984.10	0.0710216	0.05717
ENSG00000112992.15	-0.000681904	0.723448
ENSG00000112996.8	-0.00435314	0.727464
ENSG00000113048.15	0.0106728	0.0399583
ENSG00000113141.14	0.022085	0.00239398
ENSG00000113161.14	-0.0015944	0.87354
ENSG00000113163.14	0.00857569	0.154899
ENSG00000113248.5	0.0149825	0.0300376
ENSG00000113263.11	-0.025902	0.53965
ENSG00000113296.13	-0.0164854	0.557052
ENSG00000113318.9	0.0409631	0.0258426
ENSG00000113319.10	-0.013365	0.421803
ENSG00000113328.17	0.00220425	0.113748
ENSG00000113360.15	0.0114486	0.537051
ENSG00000113368.10	0.0197536	0.505069
ENSG00000113384.12	0.00383717	0.580309
ENSG00000113407.12	0.00441538	0.572838
ENSG00000113441.14	0.00401289	0.211045
ENSG00000113522.12	0.0121183	0.0633179
ENSG00000113525.8	-4.13145	0.496122
ENSG00000113575.8	0.00127451	0.789011
ENSG00000113593.10	-0.0223221	0.531384
ENSG00000113615.11	0.00431318	0.617566
ENSG00000113648.15	0.00409019	0.473004
ENSG00000113712.15	0.0123457	0.123009
ENSG00000113734.16	-0.0164288	0.732955
ENSG00000113761.10	0.089334	0.255672
ENSG00000113790.9	0.00262566	0.200501
ENSG00000113810.14	0.00247277	0.921736
ENSG00000113845.8	0.000765646	0.943049
ENSG00000113946.3	0.0300794	0.0726281
ENSG00000113971.17	-0.0849307	0.223426
ENSG00000114023.14	0.000473499	0.87372
ENSG00000114209.13	-0.0106439	0.577173
ENSG00000114302.14	-0.000624696	0.964436
ENSG00000114388.11	-0.0414637	0.394613
ENSG00000114395.9	-0.0296156	0.472572
ENSG00000114473.12	0.0779295	0.114274
ENSG00000114503.9	0.00301878	0.829017
ENSG00000114573.8	-0.00112383	0.452465
ENSG00000114648.10	-0.0784127	0.205297
ENSG00000114670.12	0.0729963	0.0550306
ENSG00000114737.14	0.000520283	0.92003
ENSG00000114738.9	-0.00477487	0.503136
ENSG00000114739.12	0.000794715	0.968393
ENSG00000114745.12	-0.0371976	0.207974
ENSG00000114767.6	-0.0367503	0.502738
ENSG00000114779.18	0.000613486	0.88489
ENSG00000114784.3	-0.00785557	0.576869
ENSG00000114790.11	0.0119607	0.846139
ENSG00000114853.12	-0.0059694	0.761666
ENSG00000114857.16	-0.0272599	0.0485438
ENSG00000114859.13	0.0137083	0.863152
ENSG00000114861.17	-0.0122094	0.316553
ENSG00000114923.15	0.028627	0.198724
ENSG00000114942.12	-0.000488054	0.733136
ENSG00000114982.16	0.0344411	0.101679
ENSG00000115020.15	-0.00490588	0.766142
ENSG00000115073.7	0.0128832	0.137964
ENSG00000115091.10	0.00081944	0.832485
ENSG00000115128.6	0.0215085	0.169719
ENSG00000115137.10	0.0506294	0.520426
ENSG00000115170.12	0.0420621	0.00208117
ENSG00000115194.9	-0.00501789	0.988519
ENSG00000115207.12	0.0475602	0.01163
ENSG00000115211.14	-0.00586801	0.835483
ENSG00000115233.10	-0.00319332	0.796884
ENSG00000115234.9	0.00480088	0.297127
ENSG00000115239.20	-0.218487	0.489815
ENSG00000115255.9	-0.151235	0.25354
ENSG00000115257.14	-0.155856	0.201412
ENSG00000115267.5	0.0109015	0.400449
ENSG00000115271.9	0.0233802	0.382748
ENSG00000115282.18	0.0171743	0.591339
ENSG00000115295.18	-0.0141411	0.573303
ENSG00000115307.15	0.000236872	0.96673
ENSG00000115317.10	0.0477402	0.153938
ENSG00000115339.12	0.0123813	0.499625
ENSG00000115365.10	0.0112707	0.078534
ENSG00000115392.10	0.0211122	0.752486
ENSG00000115414.17	8.45677e-05	0.482127
ENSG00000115415.17	0.000355634	0.771188
ENSG00000115446.10	-0.00245136	0.913482
ENSG00000115459.16	-0.141298	0.050914
ENSG00000115464.13	0.00309225	0.64772
ENSG00000115484.13	0.0011514	0.689449
ENSG00000115486.10	0.0205928	0.081836
ENSG00000115525.15	0.00559708	0.861882
ENSG00000115568.14	0.0231995	0.491101
ENSG00000115661.12	0.0073847	0.510775
ENSG00000115685.13	0.00996	0.328439
ENSG00000115687.12	0.0153353	0.785533
ENSG00000115758.11	-0.00105283	0.782003
ENSG00000115761.14	0.0661079	0.0732259
ENSG00000115816.12	0.0142335	0.237689
ENSG00000115825.8	0.0143197	0.174294
ENSG00000115827.12	-0.0390299	0.535483
ENSG00000115840.12	-0.0106584	0.6808
ENSG00000115844.9	0.301932	0.747482
ENSG00000115866.9	0.00486857	0.0396859
ENSG00000115875.17	-0.024359	0.101266
ENSG00000115942.7	-0.0299168	0.513242
ENSG00000115946.6	-0.00183829	0.944655
ENSG00000115947.12	-0.0131942	0.503237
ENSG00000115956.9	-0.00964395	0.399849
ENSG00000115966.15	0.0110468	0.249286
ENSG00000116044.14	0.000381567	0.933015
ENSG00000116133.10	-0.000935866	0.77654
ENSG00000116138.11	0.0135923	0.43854
ENSG00000116151.12	-0.0387251	0.558731
ENSG00000116171.15	0.00494656	0.0767836
ENSG00000116198.11	0.0257072	0.31476
ENSG00000116205.9	0.0774606	0.398928
ENSG00000116209.10	0.00354319	0.134862
ENSG00000116212.13	0.0503383	0.0884118
ENSG00000116213.14	-0.123271	0.120814
ENSG00000116218.11	0.0849985	0.127112
ENSG00000116237.14	0.00390477	0.713868
ENSG00000116273.5	0.0117252	0.644686
ENSG00000116285.11	0.000196033	0.884184
ENSG00000116299.15	-0.0578595	0.449702
ENSG00000116455.12	-0.0169983	0.68059
ENSG00000116459.9	0.00101266	0.771929
ENSG00000116539.9	0.00757035	0.263061
ENSG00000116580.17	-0.00221116	0.910555
ENSG00000116586.10	0.000277434	0.971456
ENSG00000116641.14	0.0434853	0.00975887
ENSG00000116667.11	-0.000918839	0.941428
ENSG00000116668.11	0.0359602	0.532423
ENSG00000116670.13	-0.00978088	0.690312
ENSG00000116679.14	0.000961369	0.344722
ENSG00000116698.19	0.0253068	0.00596239
ENSG00000116747.11	0.0053712	0.568489
ENSG00000116750.12	0.0289601	0.0880032
ENSG00000116754.12	-0.00550409	0.515795
ENSG00000116791.12	0.00107786	0.505229
ENSG00000116830.10	0.00998301	0.862138
ENSG00000116852.13	-0.0808845	0.14366
ENSG00000116871.14	0.00355987	0.705597
ENSG00000116874.10	0.0580391	0.043612
ENSG00000116883.8	-0.0800613	0.489656
ENSG00000116903.7	0.0145502	0.594084
ENSG00000116906.10	0.0217594	0.0481325
ENSG00000116918.12	0.00946495	0.529638
ENSG00000116922.13	0.0335952	0.661587
ENSG00000116954.7	0.0490302	0.0211122
ENSG00000116983.11	0.0806943	0.434737
ENSG00000116985.9	0.00516152	0.911984
ENSG00000117054.12	0.00518934	0.156762
ENSG00000117143.12	-0.00461763	0.582126
ENSG00000117262.17	-0.0591916	0.718367
ENSG00000117385.14	0.0115211	0.287333
ENSG00000117394.18	0.00175398	0.021128
ENSG00000117395.9	0.0339809	0.116683
ENSG00000117399.12	0.0220621	0.585751
ENSG00000117408.9	0.00392473	0.75769
ENSG00000117475.12	0.0214548	0.33272
ENSG00000117479.11	-0.00643217	0.63187
ENSG00000117500.11	0.00147531	0.44458
ENSG00000117505.11	-0.00711459	0.650329
ENSG00000117519.14	7.41421e-05	0.974651
ENSG00000117543.18	0.00227062	0.949739
ENSG00000117593.9	0.0431029	0.109861
ENSG00000117598.10	0.00219308	0.920571
ENSG00000117616.16	-0.0198684	0.151929
ENSG00000117620.11	0.0027286	0.848657
ENSG00000117650.11	0.147427	0.263349
ENSG00000117697.13	0.0251223	0.229626
ENSG00000117862.10	0.0189968	0.0701295
ENSG00000117877.9	0.064166	0.700421
ENSG00000117984.11	-4.92007e-05	0.819848
ENSG00000118007.11	0.023514	0.0894838
ENSG00000118096.6	0.00356999	0.799008
ENSG00000118162.12	0.00564137	0.930593
ENSG00000118181.9	0.000915605	0.436958
ENSG00000118197.12	0.016286	0.693241
ENSG00000118217.5	0.0135538	0.227512
ENSG00000118246.12	0.00241116	0.902761
ENSG00000118260.13	0.0012011	0.933199
ENSG00000118276.10	-0.0451943	0.331751
ENSG00000118298.9	0.0796898	0.613601
ENSG00000118307.17	0.0759036	0.458041
ENSG00000118363.10	0.00510331	0.768331
ENSG00000118369.11	-0.093998	0.409945
ENSG00000118454.11	0.0196731	0.380899
ENSG00000118492.15	-8.33904	0.189078
ENSG00000118523.5	-0.000604584	0.724942
ENSG00000118564.13	0.0019781	0.176843
ENSG00000118579.10	-0.00780107	0.640094
ENSG00000118640.9	-0.000916413	0.69798
ENSG00000118655.4	0.0786909	0.214815
ENSG00000118680.11	-0.000861785	0.634981
ENSG00000118707.8	0.0229621	0.594727
ENSG00000118849.8	-0.0202006	0.406281
ENSG00000118855.17	0.000599694	0.943153
ENSG00000118894.13	-0.0480098	0.63049
ENSG00000118900.13	0.00241587	0.89577
ENSG00000118939.16	-0.0940279	0.393164
ENSG00000118965.13	0.0335634	0.0854447
ENSG00000118985.13	0.00542064	0.0404243
ENSG00000119013.7	0.00260892	0.850516
ENSG00000119048.6	0.00574117	0.360756
ENSG00000119185.11	0.00613215	0.433309
ENSG00000119203.12	0.012279	0.489756
ENSG00000119242.7	0.027948	0.110749
ENSG00000119321.7	0.00347553	0.849717
ENSG00000119328.10	-0.00685075	0.88038
ENSG00000119383.18	0.00397742	0.0858847
ENSG00000119402.15	-0.00645732	0.596283
ENSG00000119421.6	-0.00602097	0.500936
ENSG00000119446.12	-0.00071816	0.968309
ENSG00000119509.11	0.00410905	0.929074
ENSG00000119523.9	-0.0225894	0.175102
ENSG00000119537.14	0.00644025	0.254888
ENSG00000119616.10	0.0397178	0.138535
ENSG00000119636.14	0.0334412	0.621718
ENSG00000119638.11	-4.73037e-05	0.996315
ENSG00000119655.7	-0.00130738	0.617662
ENSG00000119669.4	-0.0139932	0.413317
ENSG00000119682.15	-0.0340056	0.205735
ENSG00000119686.8	-0.0103213	0.680157
ENSG00000119688.19	0.00290137	0.842045
ENSG00000119705.8	-0.019021	0.474913
ENSG00000119707.12	-0.0134366	0.194892
ENSG00000119711.11	-0.000553722	0.887685
ENSG00000119715.13	-0.0440762	0.678763
ENSG00000119723.14	-0.0260038	0.674429
ENSG00000119729.9	0.00170709	0.792775
ENSG00000119760.14	0.0115569	0.62652
ENSG00000119778.13	-0.0820051	0.166291
ENSG00000119782.12	0.0502004	0.609469
ENSG00000119844.13	-0.000742025	0.94654
ENSG00000119862.11	0.00211878	0.909979
ENSG00000119878.5	0.0137832	0.481557
ENSG00000119888.9	0.000100489	0.976847
ENSG00000119906.10	0.00323823	0.869789
ENSG00000119965.11	0.0604953	0.514548
ENSG00000120008.14	0.00139586	0.92336
ENSG00000120051.13	-0.18295	0.688863
ENSG00000120053.10	-0.000488129	0.841633
ENSG00000120253.12	0.0181855	0.636049
ENSG00000120256.8	-0.0190848	0.294249
ENSG00000120265.15	-0.00272472	0.869669
ENSG00000120334.14	0.112947	0.419343
ENSG00000120370.11	0.0592501	0.621412
ENSG00000120438.10	0.00645548	0.2576
ENSG00000120458.8	-0.104396	0.157797
ENSG00000120509.9	0.00168172	0.879438
ENSG00000120526.9	-0.0274178	0.560401
ENSG00000120533.11	0.0154971	0.39909
ENSG00000120539.13	0.0635692	0.353398
ENSG00000120647.8	-0.101906	0.50914
ENSG00000120656.10	0.0686533	0.216757
ENSG00000120658.11	-0.0326461	0.841146
ENSG00000120685.18	0.0107336	0.718823
ENSG00000120688.8	0.0315753	0.597408
ENSG00000120690.12	0.0203507	0.0756399
ENSG00000120725.11	0.00017996	0.960372
ENSG00000120742.9	-0.00146093	0.756194
ENSG00000120802.12	-0.00489053	0.69939
ENSG00000120820.11	-0.0313217	0.722943
ENSG00000120868.12	0.0199546	0.567212
ENSG00000120889.11	0.00338902	0.548882
ENSG00000120896.12	0.00304558	0.516995
ENSG00000120899.16	-0.0152477	0.435275
ENSG00000120925.12	0.0166835	0.45276
ENSG00000121057.11	0.00783745	0.328181
ENSG00000121060.13	0.00396847	0.737387
ENSG00000121068.12	0.000819431	0.919485
ENSG00000121073.12	0.00529586	0.637243
ENSG00000121101.14	0.0431302	0.861489
ENSG00000121104.6	0.0606727	0.085005
ENSG00000121289.16	0.115899	0.018136
ENSG00000121297.6	0.0119436	0.811691
ENSG00000121310.15	-0.0104883	0.214466
ENSG00000121316.9	-0.00495739	0.655689
ENSG00000121440.13	0.00707931	0.792589
ENSG00000121486.10	0.0265602	0.0274344
ENSG00000121579.11	0.00205225	0.780771
ENSG00000121621.6	0.165336	0.159591
ENSG00000121766.13	0.00574548	0.853456
ENSG00000121797.9	-0.0642684	0.487682
ENSG00000121851.11	0.0536063	0.0280827
ENSG00000121879.3	0.00277047	0.845783
ENSG00000121897.12	-0.0507556	0.409639
ENSG00000121931.14	-0.0159685	0.755413
ENSG00000121988.16	0.0933745	0.423234
ENSG00000122008.14	0.0175759	0.263405
ENSG00000122026.9	-0.000289699	0.846876
ENSG00000122218.13	0.00984383	0.00477499
ENSG00000122299.10	0.0286039	0.0739018
ENSG00000122335.12	-0.233816	0.0702608
ENSG00000122376.10	9.5301e-05	0.995527
ENSG00000122390.16	-0.000799687	0.969531
ENSG00000122432.15	-2.06621	0.164418
ENSG00000122435.8	-0.206367	0.00704142
ENSG00000122481.15	-0.134772	0.529933
ENSG00000122483.16	-0.300128	0.176145
ENSG00000122484.8	-0.034678	0.487864
ENSG00000122507.19	0.0290947	0.462185
ENSG00000122512.13	0.0012199	0.973566
ENSG00000122545.16	0.004164	0.253178
ENSG00000122548.5	0.025964	0.942618
ENSG00000122550.16	0.0121643	0.504053
ENSG00000122557.8	0.010706	0.698172
ENSG00000122565.17	0.00522437	0.19081
ENSG00000122566.19	-0.000309501	0.895003
ENSG00000122592.7	0.0365154	0.547037
ENSG00000122687.16	0.0540101	0.12638
ENSG00000122741.14	-0.0116759	0.494821
ENSG00000122787.13	0.00862032	0.97997
ENSG00000122882.9	0.0281409	0.398868
ENSG00000123064.11	0.0150869	0.106395
ENSG00000123080.9	0.0259051	0.107169
ENSG00000123094.14	0.01042	0.55634
ENSG00000123119.10	0.0025508	0.904829
ENSG00000123124.12	-0.0104559	0.250312
ENSG00000123154.10	-0.0338808	0.698927
ENSG00000123191.12	0.0564788	0.00918797
ENSG00000123200.15	0.0170918	0.124364
ENSG00000123213.21	0.030131	0.0599323
ENSG00000123219.11	-0.162951	0.457577
ENSG00000123240.15	0.00950829	0.0384792
ENSG00000123353.8	-0.00930062	0.704674
ENSG00000123364.4	0.455427	0.658138
ENSG00000123405.12	-0.737026	0.28558
ENSG00000123472.11	0.00291884	0.750386
ENSG00000123562.15	0.00522711	0.183963
ENSG00000123600.17	0.0128679	0.817206
ENSG00000123684.11	0.00757461	0.145824
ENSG00000123700.4	0.00919213	0.418082
ENSG00000123908.10	0.00243796	0.841511
ENSG00000123977.8	-0.10395	0.721434
ENSG00000123989.12	0.00128547	0.551835
ENSG00000124074.10	-0.00296249	0.882854
ENSG00000124104.17	-0.016115	0.664402
ENSG00000124116.17	-0.130244	0.561335
ENSG00000124140.11	-0.404753	0.267285
ENSG00000124201.13	-0.000488647	0.946884
ENSG00000124207.15	0.00590269	0.608648
ENSG00000124209.3	-0.00320323	0.842131
ENSG00000124217.4	0.0399406	0.540983
ENSG00000124224.15	-0.0515289	0.40974
ENSG00000124249.6	-0.010636	0.81933
ENSG00000124275.13	0.0128849	0.318138
ENSG00000124357.11	0.00536833	0.754137
ENSG00000124370.9	-0.0914063	0.389016
ENSG00000124383.7	0.0278489	0.403764
ENSG00000124406.15	-0.0110492	0.374771
ENSG00000124444.14	0.0229761	0.750421
ENSG00000124571.16	0.0374769	0.0762159
ENSG00000124635.8	-0.146045	0.629044
ENSG00000124641.13	-0.0595042	0.414953
ENSG00000124659.6	-0.01073	0.802141
ENSG00000124688.12	0.000110766	0.997773
ENSG00000124702.16	0.00531251	0.596286
ENSG00000124721.16	-2.04632	0.171261
ENSG00000124733.3	0.0126824	0.264429
ENSG00000124784.7	-0.038783	0.53212
ENSG00000124788.16	0.00828934	0.46723
ENSG00000124789.10	0.00286206	0.828524
ENSG00000125122.13	-0.0279102	0.661093
ENSG00000125166.11	-0.00167172	0.65242
ENSG00000125285.5	-0.0126397	0.980192
ENSG00000125304.8	0.00318071	0.292489
ENSG00000125337.15	0.122075	0.843381
ENSG00000125352.5	0.0509889	0.40557
ENSG00000125354.21	-0.015023	0.342687
ENSG00000125356.6	-0.000849413	0.848801
ENSG00000125375.13	-0.0245057	0.254042
ENSG00000125388.18	-0.459703	0.178964
ENSG00000125445.9	0.000263374	0.979697
ENSG00000125447.15	-0.0134496	0.639934
ENSG00000125457.12	0.0288198	0.228556
ENSG00000125458.5	-0.00845023	0.670538
ENSG00000125459.13	-0.0148487	0.860218
ENSG00000125484.10	0.00422209	0.836413
ENSG00000125485.16	-0.0820353	0.218082
ENSG00000125505.15	0.0368105	0.0075934
ENSG00000125508.3	0.391376	0.619807
ENSG00000125510.14	0.109017	0.494115
ENSG00000125531.6	-0.499088	0.59779
ENSG00000125633.9	0.00292411	0.885015
ENSG00000125651.12	0.0216378	0.0225669
ENSG00000125656.7	0.0135397	0.253076
ENSG00000125733.16	0.00709743	0.390023
ENSG00000125734.12	0.00254371	0.705452
ENSG00000125743.9	-0.000826528	0.804827
ENSG00000125755.17	-0.000788229	0.929268
ENSG00000125779.20	-0.0409882	0.527383
ENSG00000125817.7	0.00157799	0.800525
ENSG00000125827.7	-0.00129405	0.629319
ENSG00000125850.9	-0.0557795	0.862023
ENSG00000125864.10	0.0128809	0.953136
ENSG00000125868.14	-0.000169453	0.932025
ENSG00000125869.8	0.0331931	0.445477
ENSG00000125870.9	0.00483284	0.744301
ENSG00000125871.12	0.0776805	0.0555213
ENSG00000125885.12	-0.105961	0.257585
ENSG00000125895.5	-0.174311	0.192672
ENSG00000125945.13	0.0126974	0.287847
ENSG00000125965.7	-1.33713	0.389492
ENSG00000125967.15	-0.00947207	0.617301
ENSG00000125970.10	0.00122209	0.811718
ENSG00000125995.14	-0.00414073	0.55726
ENSG00000125999.9	-21.3246	0.137639
ENSG00000126001.14	0.0135932	0.300403
ENSG00000126003.6	-0.0153756	0.513645
ENSG00000126070.17	-0.0455588	0.195961
ENSG00000126088.11	0.00712571	0.255756
ENSG00000126106.12	0.00630779	0.907807
ENSG00000126107.13	0.0313296	0.0439183
ENSG00000126214.19	-0.0912912	0.0234858
ENSG00000126215.12	-0.410391	0.0103368
ENSG00000126226.20	-0.0263929	0.419341
ENSG00000126261.11	-2.90384e-05	0.99702
ENSG00000126264.8	-0.0432353	0.473295
ENSG00000126432.12	-0.0011958	0.499397
ENSG00000126453.8	-0.0605984	0.533671
ENSG00000126456.14	-0.033119	0.172192
ENSG00000126524.8	0.00582644	0.458232
ENSG00000126749.13	-0.0217662	0.547482
ENSG00000126756.10	-0.00262796	0.764333
ENSG00000126768.11	-0.0121701	0.485014
ENSG00000126773.11	-0.00909568	0.353029
ENSG00000126790.10	-0.052259	0.352905
ENSG00000126803.9	0.00857977	0.246288
ENSG00000126814.6	-0.0141014	0.74703
ENSG00000126858.15	0.0168415	0.393844
ENSG00000126945.8	0.00181941	0.813492
ENSG00000127054.17	-0.00674251	0.607957
ENSG00000127125.8	0.00902069	0.285415
ENSG00000127220.5	0.0055205	0.913562
ENSG00000127249.13	0.0357372	0.109221
ENSG00000127328.20	-0.00710008	0.283235
ENSG00000127415.11	-0.00648712	0.855862
ENSG00000127419.15	-0.0301666	0.446112
ENSG00000127423.9	-1.81546	0.22923
ENSG00000127445.12	-0.0110251	0.561485
ENSG00000127452.7	-0.02378	0.70279
ENSG00000127463.12	0.012282	0.22085
ENSG00000127481.13	0.00174179	0.645343
ENSG00000127526.12	0.023469	0.014381
ENSG00000127528.5	0.00207815	0.829665
ENSG00000127554.12	-0.0261473	0.465553
ENSG00000127561.13	-1.08798	0.173196
ENSG00000127586.15	-0.157428	0.19902
ENSG00000127720.6	-0.107315	0.368451
ENSG00000127774.6	-0.0691674	0.74202
ENSG00000127837.8	0.0167661	0.0402572
ENSG00000127838.12	0.00326033	0.576071
ENSG00000127870.15	0.0180961	0.394903
ENSG00000127903.13	0.0257036	0.90435
ENSG00000127952.15	-0.00799666	0.703947
ENSG00000127980.14	-0.01556	0.546583
ENSG00000127990.14	-0.00344345	0.784139
ENSG00000127993.13	-0.00264284	0.965398
ENSG00000128050.7	0.00800905	0.293551
ENSG00000128059.7	0.0261728	0.543197
ENSG00000128185.8	-0.00439267	0.724199
ENSG00000128309.15	-0.00413821	0.588603
ENSG00000128311.12	-0.00749011	0.383051
ENSG00000128342.4	0.00252722	0.670542
ENSG00000128408.8	-0.16199	0.631988
ENSG00000128487.15	-0.0202293	0.382823
ENSG00000128512.18	0.000492609	0.962987
ENSG00000128513.13	0.00772697	0.521957
ENSG00000128524.4	-0.000297807	0.878331
ENSG00000128536.14	0.00492562	0.92874
ENSG00000128585.16	-0.00196895	0.831737
ENSG00000128590.4	8.72219e-05	0.980836
ENSG00000128626.10	-0.00741122	0.565575
ENSG00000128641.16	0.00468273	0.168554
ENSG00000128645.12	-0.13531	0.663392
ENSG00000128652.10	-0.0325715	0.851895
ENSG00000128694.10	0.00145981	0.984324
ENSG00000128699.12	-0.0464889	0.126739
ENSG00000128789.19	-0.000818775	0.957419
ENSG00000128791.10	-0.0038335	0.591241
ENSG00000128872.8	0.000502027	0.964242
ENSG00000128886.10	-1.12572	0.496221
ENSG00000128915.10	-0.017472	0.385675
ENSG00000128923.9	-0.00905722	0.359992
ENSG00000128951.12	-0.0212972	0.398283
ENSG00000129003.14	-0.00519186	0.395253
ENSG00000129055.11	-9.33165e-05	0.991018
ENSG00000129071.8	0.0252537	0.336933
ENSG00000129084.16	-0.00226429	0.871746
ENSG00000129128.11	-0.00988217	0.0717076
ENSG00000129197.13	-0.0462154	0.349003
ENSG00000129214.13	-0.76617	0.44948
ENSG00000129219.12	0.0604139	0.0466787
ENSG00000129235.9	-0.00156706	0.877191
ENSG00000129245.10	0.0204051	0.45158
ENSG00000129250.10	0.00199548	0.67963
ENSG00000129255.13	-0.0023534	0.711328
ENSG00000129317.13	-6.2155e-05	0.997945
ENSG00000129351.16	0.00668669	0.31426
ENSG00000129422.12	-3.45953e-05	0.994073
ENSG00000129472.11	-0.025293	0.495525
ENSG00000129473.8	-0.0054865	0.605028
ENSG00000129474.14	-0.00355998	0.713436
ENSG00000129484.12	-0.0706765	0.227597
ENSG00000129493.13	-0.0643679	0.178373
ENSG00000129514.5	-0.916793	0.415005
ENSG00000129535.11	-0.277444	0.39446
ENSG00000129559.11	-0.0103161	0.485101
ENSG00000129595.11	0.0198655	0.0781374
ENSG00000129654.7	-0.122296	0.506508
ENSG00000129673.8	-0.979618	0.43914
ENSG00000129933.19	0.0234826	0.23766
ENSG00000130023.14	-0.0441112	0.294245
ENSG00000130024.13	-0.00384959	0.789615
ENSG00000130035.5	-2.64492	0.16944
ENSG00000130066.15	0.000804409	0.537061
ENSG00000130150.10	0.00246102	0.947207
ENSG00000130165.9	0.00507782	0.746867
ENSG00000130175.8	0.0046125	0.00359583
ENSG00000130193.7	0.00697498	0.632603
ENSG00000130204.11	-0.00556168	0.695543
ENSG00000130234.9	0.00181431	0.391048
ENSG00000130299.15	-0.0155905	0.819175
ENSG00000130303.11	0.000151489	0.918351
ENSG00000130311.9	-0.0123752	0.604485
ENSG00000130313.5	0.00161432	0.869129
ENSG00000130332.13	-0.023031	0.403569
ENSG00000130347.11	-0.0555198	0.430315
ENSG00000130348.10	0.00674824	0.822532
ENSG00000130396.19	0.0073004	0.0903544
ENSG00000130522.5	-0.000579771	0.76216
ENSG00000130559.17	0.0132834	0.464333
ENSG00000130653.14	-0.0572457	0.124778
ENSG00000130675.13	0.346666	0.160749
ENSG00000130701.3	-0.16644	0.655035
ENSG00000130725.6	-0.00537843	0.615426
ENSG00000130726.10	0.00367057	0.451441
ENSG00000130731.14	-0.000443765	0.909509
ENSG00000130733.9	0.0046117	0.719814
ENSG00000130749.8	0.0472646	0.0166308
ENSG00000130755.11	-0.0048855	0.685635
ENSG00000130818.9	-0.035985	0.272189
ENSG00000130821.14	0.000652691	0.364726
ENSG00000130822.14	0.00150536	0.343574
ENSG00000130856.14	-0.0232385	0.667164
ENSG00000131023.11	0.0041112	0.824933
ENSG00000131037.13	-0.0225561	0.441627
ENSG00000131042.12	0.00528383	0.860938
ENSG00000131044.15	-1.63139	0.115596
ENSG00000131061.12	-0.16853	0.351418
ENSG00000131067.15	-0.00065512	0.978808
ENSG00000131069.18	0.000604101	0.940319
ENSG00000131096.9	-0.855728	0.359346
ENSG00000131100.11	-0.00219079	0.520404
ENSG00000131143.7	-0.000460373	0.63012
ENSG00000131148.7	-0.0123754	0.751548
ENSG00000131165.13	0.00503356	0.486094
ENSG00000131171.11	0.000567825	0.851073
ENSG00000131351.13	-0.119242	0.563352
ENSG00000131355.13	-0.794192	0.308382
ENSG00000131373.13	-0.0130988	0.712476
ENSG00000131374.13	0.00417886	0.694938
ENSG00000131375.8	-0.021484	0.532141
ENSG00000131462.6	0.0108511	0.568446
ENSG00000131467.9	-0.00352346	0.719466
ENSG00000131473.15	0.00302331	0.0100145
ENSG00000131495.7	-0.000406733	0.897042
ENSG00000131503.19	-0.0669121	0.431374
ENSG00000131504.14	0.00506975	0.0143976
ENSG00000131652.12	-0.0224952	0.393114
ENSG00000131653.11	0.0158723	0.194589
ENSG00000131668.12	0.0552121	0.922557
ENSG00000131732.10	0.0231742	0.635991
ENSG00000131773.12	-0.00481321	0.86441
ENSG00000131778.16	-0.0116034	0.580336
ENSG00000131779.9	0.0436209	0.0673031
ENSG00000131781.11	-0.00130419	0.970498
ENSG00000131791.7	-0.00661995	0.743466
ENSG00000131797.11	-0.0737077	0.0849031
ENSG00000131845.13	-0.0351241	0.382179
ENSG00000131848.8	-0.286382	0.188741
ENSG00000131849.10	-0.149288	0.227509
ENSG00000131876.15	-0.0505974	0.446715
ENSG00000131944.8	0.0114638	0.942149
ENSG00000131951.9	-1.71978	0.417302
ENSG00000132000.10	0.0103446	0.790952
ENSG00000132016.10	-0.138565	0.69871
ENSG00000132017.9	0.0078681	0.863491
ENSG00000132024.16	-0.00889908	0.679122
ENSG00000132128.15	-0.000430934	0.865924
ENSG00000132141.12	0.0075735	0.968543
ENSG00000132254.11	0.000562939	0.977344
ENSG00000132256.17	0.0311924	0.182686
ENSG00000132259.11	1.08005	0.213306
ENSG00000132275.9	-0.0250498	0.579872
ENSG00000132286.10	-0.0203202	0.319499
ENSG00000132300.17	-0.0294432	0.187059
ENSG00000132305.19	0.00873124	0.185198
ENSG00000132361.15	0.00732854	0.221694
ENSG00000132376.18	0.0106746	0.553246
ENSG00000132383.10	0.0337246	0.0175209
ENSG00000132394.9	0.0625115	0.00947863
ENSG00000132424.13	-0.0131245	0.161626
ENSG00000132432.12	0.00122861	0.816663
ENSG00000132466.16	0.00486923	0.485051
ENSG00000132478.8	0.0235135	0.446282
ENSG00000132485.11	-0.0192061	0.210115
ENSG00000132541.9	-0.00244196	0.636201
ENSG00000132549.17	0.00103637	0.905976
ENSG00000132581.8	0.00454521	0.856395
ENSG00000132589.14	0.0018277	0.589042
ENSG00000132591.10	0.0189976	0.255092
ENSG00000132600.15	0.027045	0.454266
ENSG00000132603.12	-0.0127161	0.686705
ENSG00000132635.15	-0.00438921	0.755155
ENSG00000132646.9	-0.00487705	0.70333
ENSG00000132661.3	-0.0436518	0.316911
ENSG00000132664.10	-0.0538533	0.442576
ENSG00000132692.17	-0.0086871	0.816263
ENSG00000132716.17	-0.000799981	0.951796
ENSG00000132718.8	0.0157207	0.1857
ENSG00000132740.7	-0.0977103	0.187017
ENSG00000132763.13	0.0219219	0.691455
ENSG00000132773.10	-0.0461449	0.604573
ENSG00000132781.16	-0.159742	0.137651
ENSG00000132801.6	-0.129178	0.485123
ENSG00000132823.9	-0.00110729	0.899549
ENSG00000132837.13	0.00704353	0.0551278
ENSG00000132846.5	0.0518413	2.09035e-06
ENSG00000132849.17	-0.000714076	0.885254
ENSG00000132906.16	0.0362421	0.320352
ENSG00000132950.17	0.00391507	0.95494
ENSG00000132952.10	-0.0178307	0.651461
ENSG00000133027.16	0.0159632	0.5645
ENSG00000133028.9	-0.0117596	0.644165
ENSG00000133112.15	2.10214e-05	0.806558
ENSG00000133114.16	0.00253311	0.949992
ENSG00000133247.12	-0.046737	0.642113
ENSG00000133302.11	-0.0020124	0.972548
ENSG00000133460.18	-0.061545	0.145829
ENSG00000133597.8	0.0186988	0.0627742
ENSG00000133639.4	0.0016269	0.415917
ENSG00000133640.17	-0.0270229	0.84385
ENSG00000133641.16	-0.0210604	0.521034
ENSG00000133678.12	0.0406548	0.245967
ENSG00000133740.9	-0.212019	0.098798
ENSG00000133773.10	0.00722276	0.772783
ENSG00000133872.12	0.00117222	0.330938
ENSG00000133943.19	-0.0102359	0.376299
ENSG00000133958.12	-0.012059	0.900479
ENSG00000133985.2	-0.0131041	0.721285
ENSG00000134001.11	-0.00860577	0.49334
ENSG00000134077.14	-0.011927	0.599749
ENSG00000134107.4	0.000201864	0.880183
ENSG00000134109.9	0.0143373	0.185186
ENSG00000134121.8	-0.0785051	0.331286
ENSG00000134146.10	-0.070272	0.309356
ENSG00000134153.8	0.000701609	0.930843
ENSG00000134215.14	1.03836e-05	0.998518
ENSG00000134247.9	0.0097577	0.00182533
ENSG00000134255.12	0.00672656	0.783678
ENSG00000134262.11	-0.122739	0.209548
ENSG00000134278.13	-0.00248641	0.716935
ENSG00000134283.16	-0.0103438	0.72789
ENSG00000134291.10	-0.00196787	0.653774
ENSG00000134297.6	0.0982913	0.478181
ENSG00000134321.10	0.0168727	0.314134
ENSG00000134324.10	-0.0212608	0.374729
ENSG00000134326.10	0.035391	0.172347
ENSG00000134352.18	0.00123081	0.354905
ENSG00000134444.12	-0.0193412	0.45992
ENSG00000134452.18	0.02199	0.347492
ENSG00000134461.14	0.00636755	0.945367
ENSG00000134575.8	0.00447963	0.684852
ENSG00000134690.9	0.0683078	0.365832
ENSG00000134717.16	0.00676949	0.63672
ENSG00000134748.12	0.0171145	0.374181
ENSG00000134755.13	0.0142542	0.157531
ENSG00000134758.12	-0.031654	0.402049
ENSG00000134759.12	0.00176724	0.86918
ENSG00000134779.13	0.00645304	0.526629
ENSG00000134824.12	0.00958437	0.0889949
ENSG00000134825.12	0.0126097	0.261368
ENSG00000134851.11	-0.0147184	0.292382
ENSG00000134852.13	0.00271188	0.855441
ENSG00000134882.14	0.0105814	0.194543
ENSG00000134897.12	0.0107722	0.340737
ENSG00000134901.11	0.0531543	0.0238247
ENSG00000134905.15	-0.00247385	0.856795
ENSG00000134910.11	0.00758987	0.0807003
ENSG00000134987.10	0.00725733	0.672604
ENSG00000134996.11	-0.0115293	0.581637
ENSG00000135018.12	-0.00413062	0.498442
ENSG00000135045.6	-0.0941793	0.548634
ENSG00000135077.7	0.00329304	0.0410307
ENSG00000135097.5	-0.0311573	0.851612
ENSG00000135119.13	-0.103924	0.461851
ENSG00000135164.17	-0.0262946	0.110923
ENSG00000135205.13	0.00333434	0.0138542
ENSG00000135211.5	-0.0230995	0.543237
ENSG00000135241.15	-0.00547383	0.476182
ENSG00000135298.12	0.592962	0.0125699
ENSG00000135336.13	-5.74276e-05	0.998406
ENSG00000135404.10	0.000148546	0.778968
ENSG00000135424.14	-0.00238917	0.800797
ENSG00000135441.6	-0.00958396	0.450265
ENSG00000135446.15	0.00414483	0.610197
ENSG00000135473.13	-0.010794	0.510337
ENSG00000135486.16	0.00481596	0.00561266
ENSG00000135502.15	-0.121635	0.845946
ENSG00000135517.6	-7.04802	0.0822268
ENSG00000135525.17	0.00360089	0.506204
ENSG00000135535.13	0.000820306	0.534489
ENSG00000135540.10	0.0650664	0.00222737
ENSG00000135541.19	-0.0691329	0.302534
ENSG00000135549.13	-0.0905793	0.218716
ENSG00000135577.4	-0.239673	0.870274
ENSG00000135587.7	-0.0171288	0.71586
ENSG00000135617.3	-0.0120582	0.589867
ENSG00000135624.14	0.00322566	0.376461
ENSG00000135637.12	-0.066048	0.481014
ENSG00000135677.9	0.00138743	0.178534
ENSG00000135698.8	-0.0111502	0.857511
ENSG00000135720.11	0.00635437	0.4514
ENSG00000135722.7	-0.000257768	0.995801
ENSG00000135763.8	-0.0328525	0.509313
ENSG00000135801.8	0.0259966	0.505104
ENSG00000135837.14	0.00148248	0.889944
ENSG00000135870.10	0.00262552	0.855655
ENSG00000135913.9	-0.0123615	0.751228
ENSG00000135930.12	0.00968314	0.4377
ENSG00000135951.13	-0.0708662	0.610918
ENSG00000135953.9	0.0236012	0.603831
ENSG00000135956.7	0.0156965	0.0208321
ENSG00000135972.7	0.00714639	0.845963
ENSG00000135974.8	0.030517	0.512599
ENSG00000136002.15	-0.00594205	0.981473
ENSG00000136014.10	-0.0963467	0.793286
ENSG00000136021.16	-0.0165034	0.324471
ENSG00000136044.10	0.0152738	0.317175
ENSG00000136051.12	-0.00175182	0.840676
ENSG00000136108.13	0.0516969	0.0879713
ENSG00000136122.14	0.0144325	0.963954
ENSG00000136143.12	0.00780381	0.467929
ENSG00000136160.13	0.00282709	0.0783968
ENSG00000136167.12	-0.00114793	0.655001
ENSG00000136169.15	-0.0355759	0.350186
ENSG00000136261.13	0.0102068	0.401965
ENSG00000136305.10	0.000737202	0.998719
ENSG00000136319.10	0.0047877	0.904638
ENSG00000136367.13	-0.26343	0.240504
ENSG00000136378.13	0.0201801	0.391981
ENSG00000136425.11	0.0296013	0.380811
ENSG00000136449.12	-0.670164	0.320952
ENSG00000136450.11	-0.0061212	0.510561
ENSG00000136451.7	0.00159618	0.878394
ENSG00000136490.7	-0.0174538	0.390171
ENSG00000136504.10	0.0440295	0.0238346
ENSG00000136521.11	-0.00127659	0.707726
ENSG00000136522.12	-0.0181752	0.423808
ENSG00000136536.13	-0.00371248	0.734128
ENSG00000136630.12	0.00138283	0.910295
ENSG00000136699.18	0.050844	0.0248091
ENSG00000136710.8	0.0503398	0.000682453
ENSG00000136718.8	0.0145749	0.34236
ENSG00000136738.13	0.0212625	0.50314
ENSG00000136758.17	0.00461432	0.438176
ENSG00000136802.10	0.0064662	0.365366
ENSG00000136868.10	-0.0104649	0.415768
ENSG00000136870.9	-0.00222531	0.682946
ENSG00000136874.9	-0.0281025	0.390766
ENSG00000136875.11	0.0115333	0.643076
ENSG00000136897.7	-0.0287105	0.210999
ENSG00000136925.13	-0.0899199	0.151011
ENSG00000136937.11	-0.0296909	0.289782
ENSG00000136942.13	-0.000742279	0.475096
ENSG00000136944.16	-0.280983	0.510076
ENSG00000136950.12	-0.0641527	0.0574646
ENSG00000136986.8	0.00486135	0.241983
ENSG00000137055.13	-0.00497981	0.82726
ENSG00000137074.17	-0.0770915	0.115003
ENSG00000137076.17	0.00205202	0.0839747
ENSG00000137094.13	-0.00120088	0.961582
ENSG00000137101.11	-0.00594109	0.902003
ENSG00000137103.15	-0.00526288	0.67767
ENSG00000137133.9	-0.00496334	0.71135
ENSG00000137210.12	-0.00213616	0.817363
ENSG00000137216.17	0.0315406	0.00114081
ENSG00000137269.13	0.0412834	0.264882
ENSG00000137285.9	-0.0844464	0.458997
ENSG00000137310.10	0.0115804	0.317022
ENSG00000137312.13	0.00241643	0.343065
ENSG00000137364.4	0.00161637	0.82498
ENSG00000137413.14	0.0244705	0.459838
ENSG00000137434.10	-0.73183	0.465946
ENSG00000137449.14	-0.0044734	0.486115
ENSG00000137492.6	-0.0362197	0.165107
ENSG00000137494.12	0.0356478	0.496842
ENSG00000137497.16	0.00539223	0.142188
ENSG00000137500.8	0.000589909	0.971802
ENSG00000137502.8	-0.030367	0.462116
ENSG00000137522.16	0.0158457	0.5559
ENSG00000137571.9	0.148171	0.698374
ENSG00000137574.9	0.00758689	0.872774
ENSG00000137601.14	-0.0208758	0.629805
ENSG00000137642.11	0.000332487	0.783065
ENSG00000137656.10	-0.015299	0.80368
ENSG00000137693.12	0.00944159	0.139842
ENSG00000137720.6	-0.0107578	0.607195
ENSG00000137764.18	0.0196721	0.661854
ENSG00000137770.12	-0.0106258	0.634398
ENSG00000137804.11	0.027302	0.186877
ENSG00000137807.12	-0.0134011	0.876827
ENSG00000137814.8	-0.0283736	0.548833
ENSG00000137819.12	-0.00689812	0.431384
ENSG00000137821.10	-0.0079978	0.906125
ENSG00000137857.16	0.0311588	0.317184
ENSG00000137871.18	-0.0102017	0.621366
ENSG00000137936.15	0.0304128	0.319552
ENSG00000137960.5	0.00440726	0.424804
ENSG00000137976.7	-0.314537	0.605073
ENSG00000137996.11	0.0266006	0.341416
ENSG00000138032.19	0.00307628	0.894445
ENSG00000138074.13	-0.0087374	0.766717
ENSG00000138075.10	-4.18575	0.0275568
ENSG00000138078.14	0.00628892	0.409116
ENSG00000138081.18	0.00932515	0.711825
ENSG00000138083.4	-0.130168	0.737066
ENSG00000138085.15	-0.000253389	0.937882
ENSG00000138092.9	0.134267	0.244329
ENSG00000138172.9	0.00854827	0.695472
ENSG00000138175.8	0.00807642	0.636888
ENSG00000138286.13	0.00080083	0.97942
ENSG00000138375.11	0.0663951	0.0253237
ENSG00000138376.9	-0.124664	0.251932
ENSG00000138400.11	-0.037816	0.816239
ENSG00000138413.12	0.00908985	0.117697
ENSG00000138433.14	0.0423022	0.00597182
ENSG00000138434.15	0.00832615	0.134642
ENSG00000138442.8	0.00443232	0.883139
ENSG00000138459.7	0.00633016	0.605586
ENSG00000138463.8	-0.00606452	0.827563
ENSG00000138496.15	0.00317395	0.688679
ENSG00000138614.13	0.0080799	0.733441
ENSG00000138629.14	0.013569	0.441072
ENSG00000138640.13	0.00573912	0.031411
ENSG00000138650.8	0.0054398	0.0180807
ENSG00000138658.14	-0.405524	0.0972704
ENSG00000138660.10	0.00363771	0.833781
ENSG00000138668.17	0.0036422	0.527752
ENSG00000138674.15	0.0108528	0.00565936
ENSG00000138686.8	0.0153579	0.734223
ENSG00000138696.9	-0.0174255	0.537189
ENSG00000138698.13	-0.0154201	0.46401
ENSG00000138756.16	-0.00569724	0.833346
ENSG00000138757.13	0.000688451	0.877942
ENSG00000138760.7	0.00431487	0.0274388
ENSG00000138768.13	2.90342e-05	0.995624
ENSG00000138802.10	0.00401991	0.741751
ENSG00000138814.15	0.000443326	0.974345
ENSG00000138823.11	0.0246475	0.570404
ENSG00000138867.15	0.0026979	0.500365
ENSG00000138942.14	-0.00500518	0.710248
ENSG00000139117.12	0.0256423	0.0160325
ENSG00000139151.13	-4.17142	0.410672
ENSG00000139163.14	-0.0149977	0.210072
ENSG00000139180.9	-0.0087253	0.403154
ENSG00000139182.12	0.00981492	0.00377986
ENSG00000139187.8	-0.340124	0.147379
ENSG00000139192.10	0.0105858	0.323238
ENSG00000139194.6	0.0017119	0.0987435
ENSG00000139197.9	0.0248954	0.00632672
ENSG00000139211.6	-0.00502912	0.841012
ENSG00000139233.5	-0.0147508	0.776592
ENSG00000139263.10	0.0170162	0.125864
ENSG00000139266.5	0.0171676	0.465748
ENSG00000139323.12	-0.00336307	0.902216
ENSG00000139324.10	0.00475463	0.315685
ENSG00000139343.9	-0.00838138	0.716497
ENSG00000139344.6	0.0373631	0.472186
ENSG00000139352.3	-8.79571	0.283516
ENSG00000139372.13	-0.0187672	0.765016
ENSG00000139405.14	0.0413286	0.12164
ENSG00000139428.10	-0.00104168	0.879377
ENSG00000139433.8	-0.00454076	0.457184
ENSG00000139496.14	0.000319715	0.977623
ENSG00000139517.7	0.0126518	0.492821
ENSG00000139537.9	-0.202285	0.278776
ENSG00000139546.9	-0.00769682	0.829268
ENSG00000139579.11	0.0193742	0.110637
ENSG00000139618.13	0.0196921	0.7839
ENSG00000139625.11	-0.0098	0.813741
ENSG00000139631.17	-0.065667	0.0966285
ENSG00000139637.12	0.00711312	0.40878
ENSG00000139644.11	0.000498095	0.241999
ENSG00000139651.10	0.0441274	0.155383
ENSG00000139687.12	0.00917729	0.050665
ENSG00000139697.10	0.00931444	0.513776
ENSG00000139718.9	-0.00221167	0.910371
ENSG00000139725.6	-0.464454	0.158573
ENSG00000139746.14	-0.0360151	0.200788
ENSG00000139826.5	-0.0424114	0.295433
ENSG00000139842.13	0.0141866	0.335979
ENSG00000139865.15	-12.9844	0.157156
ENSG00000139910.18	-0.00801895	0.761536
ENSG00000139946.8	0.00727283	0.820479
ENSG00000139971.14	-0.0396783	0.50341
ENSG00000139974.14	-0.148508	0.112583
ENSG00000140006.10	-0.00814304	0.905233
ENSG00000140025.14	-0.00724594	0.954009
ENSG00000140044.11	0.0137751	0.371913
ENSG00000140105.16	-0.00239278	0.467651
ENSG00000140107.10	-0.392031	0.798517
ENSG00000140153.16	-0.0508786	0.213666
ENSG00000140254.11	0.137661	0.180475
ENSG00000140262.16	0.00591444	0.30165
ENSG00000140264.18	-0.000523765	0.650573
ENSG00000140279.11	-0.0247007	0.851948
ENSG00000140280.12	-0.0210683	0.465263
ENSG00000140284.9	-0.00306319	0.640226
ENSG00000140319.9	0.00153243	0.590041
ENSG00000140382.13	0.043606	0.203677
ENSG00000140395.7	0.00123561	0.917647
ENSG00000140398.12	-0.133894	0.0737791
ENSG00000140400.13	-0.0171548	0.169303
ENSG00000140403.11	0.00152086	0.812334
ENSG00000140406.3	0.00107629	0.950945
ENSG00000140463.12	-0.00326201	0.934466
ENSG00000140464.18	0.00704144	0.328893
ENSG00000140471.15	-0.226048	0.0055262
ENSG00000140521.10	0.0116847	0.194279
ENSG00000140526.15	-0.000306058	0.832632
ENSG00000140527.13	0.0305189	0.870151
ENSG00000140598.12	0.0124546	0.676135
ENSG00000140632.15	0.0025029	0.732808
ENSG00000140682.17	0.00866613	0.512033
ENSG00000140694.15	0.0254686	0.116971
ENSG00000140718.17	0.0134516	0.0200177
ENSG00000140740.9	-0.00142531	0.5255
ENSG00000140743.6	-0.00118417	0.924836
ENSG00000140750.15	0.00238353	0.878278
ENSG00000140795.11	-0.0196268	0.973917
ENSG00000140829.10	0.0404741	0.0572887
ENSG00000140830.7	0.0747964	0.223036
ENSG00000140832.8	-0.00373591	0.907196
ENSG00000140836.13	0.00130092	0.899816
ENSG00000140839.10	0.00695107	0.411798
ENSG00000140848.15	-0.00126052	0.87515
ENSG00000140943.15	0.0089608	0.253326
ENSG00000140948.10	-0.00161975	0.855604
ENSG00000140987.18	-0.123016	0.755946
ENSG00000140988.14	0.000835826	0.149429
ENSG00000140993.9	-0.0380597	0.874004
ENSG00000141012.11	-0.00993857	0.599602
ENSG00000141013.13	0.0275079	0.201817
ENSG00000141027.19	0.00755761	0.279466
ENSG00000141034.8	0.105563	0.0475956
ENSG00000141084.9	0.00132046	0.953087
ENSG00000141258.11	-0.019748	0.264844
ENSG00000141294.8	-0.0844445	0.697325
ENSG00000141367.10	0.00205255	0.20074
ENSG00000141378.14	-0.0576182	0.342014
ENSG00000141424.11	-0.000852462	0.835319
ENSG00000141431.8	0.000848574	0.988032
ENSG00000141448.7	0.0245118	0.658227
ENSG00000141449.13	-0.00890574	0.909428
ENSG00000141456.13	0.00161124	0.886332
ENSG00000141497.12	0.00831054	0.924052
ENSG00000141499.15	0.00925962	0.840471
ENSG00000141506.12	0.0180703	0.507283
ENSG00000141519.13	-0.0566163	0.356662
ENSG00000141540.9	0.0269542	0.237123
[truncated: 4,095 more rows]

## Sheet: BG.DFI.KIRP
Gene	Coefficient	Logrank p-value
ENSG00000000419.11	0.0251999	0.366184
ENSG00000001561.6	0.00311403	0.640856
ENSG00000001629.8	-0.0024188	0.563526
ENSG00000001631.13	-0.00389323	0.803589
ENSG00000002016.15	-0.0242736	0.433863
ENSG00000002933.6	-0.000297715	0.598277
ENSG00000003056.6	0.00899581	0.100335
ENSG00000003147.16	-0.0448732	0.0130293
ENSG00000003249.12	-0.0182762	0.00225378
ENSG00000003509.14	-0.0234882	0.575927
ENSG00000004139.12	-0.0245043	0.489649
ENSG00000004142.10	-0.00558691	0.0742006
ENSG00000004455.15	-0.00704829	0.23614
ENSG00000004478.7	0.00314402	0.293255
ENSG00000004700.14	0.0113376	0.396145
ENSG00000004776.10	0.0194207	0.24265
ENSG00000004799.7	-0.000152741	0.918883
ENSG00000004961.13	0.0193764	0.124196
ENSG00000005001.8	0.0230689	0.0854331
ENSG00000005022.5	4.70439e-05	0.957857
ENSG00000005073.5	0.0908562	0.00720349
ENSG00000005100.11	-0.0231176	0.383915
ENSG00000005156.10	0.0729729	5.66507e-05
ENSG00000005175.8	0.0691574	0.00500212
ENSG00000005194.13	-0.0114689	0.0902185
ENSG00000005206.15	-0.00774314	0.231482
ENSG00000005448.15	-0.0270948	0.0967747
ENSG00000005469.10	0.00099238	0.948464
ENSG00000005483.18	0.00682889	0.262434
ENSG00000005513.9	0.00289679	0.789677
ENSG00000005812.9	-0.0054669	0.717674
ENSG00000005884.16	-0.000940013	0.0291867
ENSG00000005889.14	0.0303066	0.0481358
ENSG00000006016.9	-0.0061941	0.709973
ENSG00000006118.13	0.00712161	0.10616
ENSG00000006125.15	-0.00179035	0.250179
ENSG00000006432.14	-0.106696	0.023344
ENSG00000006459.9	-0.00627457	0.78912
ENSG00000006530.14	-0.0272861	0.0517801
ENSG00000006576.15	0.0555753	0.0560289
ENSG00000006634.6	0.12883	0.0197937
ENSG00000006638.10	0.0666357	0.305961
ENSG00000006695.9	-0.0475261	0.0415179
ENSG00000006712.13	-0.00723577	0.598626
ENSG00000006740.15	-0.0463503	0.219863
ENSG00000006747.13	-0.00226018	0.121758
ENSG00000006837.10	0.101561	0.808371
ENSG00000007001.11	0.00527894	0.85155
ENSG00000007255.9	-0.0196089	0.218941
ENSG00000007350.15	0.33777	0.151204
ENSG00000007376.6	-0.0161895	0.38439
ENSG00000007384.14	-0.0301596	0.0117422
ENSG00000007520.3	-0.00581389	0.462073
ENSG00000007545.14	-0.0300394	0.431704
ENSG00000008018.8	0.0036756	0.206973
ENSG00000008128.21	-0.0404436	0.547974
ENSG00000008300.13	0.0562661	0.0173744
ENSG00000008382.14	-0.0205032	0.254974
ENSG00000008405.10	0.0121018	0.596645
ENSG00000008735.13	0.0806955	0.000177926
ENSG00000008869.10	0.0107467	0.58281
ENSG00000008952.15	0.00028618	0.94484
ENSG00000008988.8	0.000639492	0.0341224
ENSG00000009413.14	0.0126997	0.400229
ENSG00000009830.10	-0.0422125	0.0379807
ENSG00000010030.12	0.0553953	0.0181914
ENSG00000010072.14	0.281135	0.000282309
ENSG00000010244.15	0.0303267	0.000109429
ENSG00000010282.13	0.00046935	0.0864787
ENSG00000010292.11	0.0231367	0.00403835
ENSG00000010318.18	-0.273497	0.00772912
ENSG00000010361.12	-0.0535821	0.0176279
ENSG00000010671.14	0.0255087	0.316284
ENSG00000010803.15	-0.0171818	0.0510717
ENSG00000011021.20	-0.043976	0.0904259
ENSG00000011028.12	0.000197895	0.912999
ENSG00000011114.13	-0.00941149	0.233951
ENSG00000011132.10	-0.0197948	0.681572
ENSG00000011258.14	0.0425093	0.100535
ENSG00000011260.12	0.055175	0.00272531
ENSG00000011295.14	-0.0302478	0.0078683
ENSG00000011405.12	0.00510153	0.574173
ENSG00000011426.9	0.0458	6.17203e-05
ENSG00000011478.10	-0.0220862	0.564811
ENSG00000011566.13	0.00859046	0.457225
ENSG00000012048.18	0.12504	2.59271e-06
ENSG00000012171.16	-0.00578213	0.154273
ENSG00000012660.12	0.00426574	0.0160959
ENSG00000012963.12	-0.0118202	0.470637
ENSG00000013016.13	0.0255918	0.0343996
ENSG00000013364.17	-0.00110356	0.101531
ENSG00000013375.14	0.0447137	0.0198862
ENSG00000013392.7	0.020782	0.706638
ENSG00000013523.8	-0.0550699	0.092284
ENSG00000013563.12	-0.0127945	0.533555
ENSG00000013573.15	0.00246808	0.835188
ENSG00000013583.7	-0.00514131	0.390547
ENSG00000013810.17	0.00561543	0.000146346
ENSG00000014123.9	0.0302897	0.0795256
ENSG00000014164.6	0.0303103	0.0429876
ENSG00000015133.17	0.0231669	0.0575169
ENSG00000015153.13	0.0216944	0.378517
ENSG00000015479.16	0.015258	0.821686
ENSG00000016391.9	-0.0056649	0.0505889
ENSG00000018189.11	-9.40241e-05	0.992622
ENSG00000018510.11	-0.00601006	0.297316
ENSG00000018869.15	-0.168858	0.417735
ENSG00000020129.14	-0.0490552	0.0267672
ENSG00000020922.11	0.022561	0.603928
ENSG00000021826.13	0.0207972	0.0278076
ENSG00000022840.14	0.00217182	0.550355
ENSG00000023041.10	-0.0435791	0.179068
ENSG00000023228.12	-0.00266864	0.322089
ENSG00000023318.7	0.0195068	0.0581388
ENSG00000023734.9	0.00178347	0.684469
ENSG00000024526.15	0.127504	0.000346045
ENSG00000024862.15	-0.0324464	0.037655
ENSG00000025423.10	0.0854118	0.489651
ENSG00000025434.17	0.00679547	0.543994
ENSG00000025770.17	-0.0126599	0.500546
ENSG00000025796.12	0.015272	0.0761671
ENSG00000026103.18	-0.00632894	0.533202
ENSG00000026508.15	-8.32157e-05	0.936335
ENSG00000027001.8	-0.0224146	0.0308658
ENSG00000028203.16	0.0172033	0.111156
ENSG00000028310.16	-0.00166057	0.942596
ENSG00000028528.13	-0.00332422	0.623227
ENSG00000029364.10	-0.00354665	0.68378
ENSG00000030419.15	0.0288797	0.0212775
ENSG00000031691.6	0.288599	2.47424e-07
ENSG00000031823.13	0.00281343	0.863242
ENSG00000032219.17	0.0190398	0.508769
ENSG00000032742.16	-0.0321214	0.175564
ENSG00000033011.10	7.38171e-05	0.996699
ENSG00000033030.12	0.0518677	0.0251623
ENSG00000033178.11	0.0216707	0.0216242
ENSG00000034533.10	0.259457	0.00380953
ENSG00000034693.13	-0.0514205	0.122755
ENSG00000036672.14	4.03678e-05	0.990011
ENSG00000037241.6	0.015631	0.544009
ENSG00000037474.13	0.0222305	0.0103103
ENSG00000037637.9	-0.0211	0.565681
ENSG00000037749.10	0.0275796	0.23565
ENSG00000037897.15	0.0164047	0.336889
ENSG00000038219.11	0.00968329	0.267377
ENSG00000039123.14	0.0152267	0.174363
ENSG00000039600.9	0.0374722	0.928211
ENSG00000039650.8	-0.0402163	0.0244011
ENSG00000040487.11	-0.0303471	0.207717
ENSG00000040531.13	-0.0682839	0.00156832
ENSG00000041880.13	-0.0325613	0.00740093
ENSG00000042088.12	0.0646943	0.248743
ENSG00000042429.9	-0.00629086	0.821499
ENSG00000042445.12	-0.00262907	0.434337
ENSG00000042493.14	-0.000754333	0.392645
ENSG00000044574.7	0.0015213	0.0493541
ENSG00000046604.11	-0.000961888	0.631163
ENSG00000046651.13	0.0153273	0.129412
ENSG00000047056.13	-0.0209977	0.525594
ENSG00000047365.10	0.00942261	0.649266
ENSG00000047410.12	0.00876202	0.000731136
ENSG00000047578.11	-0.0275912	0.0329214
ENSG00000047621.10	0.0655939	0.0932735
ENSG00000048162.18	0.045807	0.011697
ENSG00000048392.10	-0.00792412	0.329003
ENSG00000048471.12	-0.000195297	0.951979
ENSG00000048649.12	0.00262115	0.835465
ENSG00000048991.15	0.0704261	0.0050708
ENSG00000049130.12	-0.00170246	0.460174
ENSG00000049167.12	-0.0638563	0.571795
ENSG00000049618.20	0.00888971	0.335934
ENSG00000049883.13	-0.0617956	0.229524
ENSG00000050130.16	-0.00756745	0.659509
ENSG00000050327.13	-0.0367949	0.106688
ENSG00000051009.9	-0.0388075	0.130291
ENSG00000051128.17	-0.00660608	0.23937
ENSG00000051180.15	0.200286	6.06195e-07
ENSG00000051620.9	0.0183778	0.0136217
ENSG00000052749.12	0.0171397	0.153828
ENSG00000052841.13	0.0291017	0.0100267
ENSG00000053371.11	-0.0204513	0.0198822
ENSG00000053372.4	0.0219583	0.211095
ENSG00000053770.10	-0.0154337	0.32091
ENSG00000054116.10	-0.00719854	0.623144
ENSG00000054267.19	0.0392903	0.000440493
ENSG00000054282.14	0.0813003	0.105072
ENSG00000054611.12	-0.0304158	0.0552422
ENSG00000054690.12	-0.00940286	0.21141
ENSG00000055070.15	-0.0142337	0.0719228
ENSG00000055130.14	0.0137094	0.196819
ENSG00000055147.16	-0.000357709	0.992283
ENSG00000055163.17	-0.00117776	0.588884
ENSG00000055609.16	-0.0020362	0.713417
ENSG00000055950.15	-0.0186769	0.0948639
ENSG00000056736.8	-0.00562982	0.0594269
ENSG00000057019.14	0.00120107	0.305193
ENSG00000057757.8	-0.0193973	0.378551
ENSG00000057935.12	0.00704946	0.731566
ENSG00000058063.14	0.00133464	0.840006
ENSG00000058272.14	0.0167676	0.0798204
ENSG00000059377.14	0.00102004	0.907493
ENSG00000059769.18	0.00592749	0.917481
ENSG00000060069.15	-0.0375662	0.159908
ENSG00000060491.15	-0.000675345	0.916558
ENSG00000060688.11	0.0589315	0.031658
ENSG00000060762.17	-0.0102629	0.155667
[truncated: 5,938 more rows]

## Sheet: BG.DFI.LIHC
Gene	Coefficient	Logrank p-value
[truncated: 5,770 more rows]

[truncated: 32 more sheets: BG.DFI.LUAD, BG.DFI.LUSC, BG.DFI.PRAD, BG.DFI.STAD, BG.DFI.THCA, BG.DFI.UCEC, BG.OS.BLCA, BG.OS.BRCA, BG.OS.COAD, BG.OS.HNSC, BG.OS.KIRC, BG.OS.KIRP, BG.OS.LIHC, BG.OS.LUAD, BG.OS.LUSC, BG.OS.PRAD, BG.OS.STAD, BG.OS.THCA, BG.OS.UCEC, BG.PFI.BLCA …]
