# Supplementary material for: Characterization of bidirectional gene pairs in The Cancer Genome Atlas (TCGA) dataset
Source: PeerJ. 2019 Jun 17;7:e7107. doi: 10.7717/peerj.7107 (PMC6585903; doi:10.7717/peerj.7107)
Supplement: Supplemental Information 12 [file peerj-07-7107-s012.xlsx]

## Sheet: CG.DFI.BLCA
Gene	Coefficient	Logrank p-value
ENSG00000002330.12	-0.0161982	0.123121
ENSG00000004487.14	-0.00235556	0.383206
ENSG00000004534.13	-0.0075068	0.123304
ENSG00000004777.17	0.0147542	0.217001
ENSG00000004864.12	0.0256439	0.00929866
ENSG00000004975.10	-0.00874693	0.528125
ENSG00000005007.11	0.0014711	0.746405
ENSG00000005059.14	0.00115552	0.897741
ENSG00000006007.10	-0.00242631	0.378986
ENSG00000006047.11	-0.0404844	0.46017
ENSG00000006282.18	0.004326	0.192437
ENSG00000006283.16	0.13918	0.551912
ENSG00000008056.11	-0.141013	0.280075
ENSG00000008083.12	-0.00232231	0.584888
ENSG00000008118.8	0.281635	0.247284
ENSG00000008256.14	0.00853077	0.306543
ENSG00000008323.14	0.00139312	0.804468
ENSG00000008438.4	2.44212	0.00558968
ENSG00000008441.15	0.000937038	0.880794
ENSG00000009724.15	0.283437	0.0792371
ENSG00000010327.9	-0.00380516	0.255036
ENSG00000011009.9	-0.00474212	0.217936
ENSG00000011143.15	-0.00325014	0.905164
ENSG00000011304.15	-0.00298876	0.204942
ENSG00000012211.11	-0.00151854	0.932232
ENSG00000013306.14	0.0008982	0.657801
ENSG00000015532.8	0.0110969	0.173561
ENSG00000016402.11	-0.00534649	0.524203
ENSG00000016864.15	-0.00371125	0.59533
ENSG00000019102.10	-0.000747417	0.554567
ENSG00000019144.15	0.00759461	0.287684
ENSG00000025708.11	-0.000554158	0.477001
ENSG00000029639.9	-0.0347423	0.43968
ENSG00000030582.15	0.000158111	0.776346
ENSG00000033100.13	0.006921	0.212733
ENSG00000035681.6	-0.0018351	0.888466
ENSG00000035720.6	-0.0595027	0.529257
ENSG00000037042.8	-0.0130016	0.263197
ENSG00000042062.10	0.0175986	0.285631
ENSG00000047579.18	-0.0237768	0.223508
ENSG00000047849.20	-0.00170989	0.326257
ENSG00000048462.9	-0.444659	0.0817956
ENSG00000050426.14	-0.00577729	0.502681
ENSG00000050820.15	7.6725e-05	0.982385
ENSG00000052344.14	0.00224666	0.170859
ENSG00000054983.15	0.00556549	0.693584
ENSG00000055211.11	0.00889307	0.397448
ENSG00000059691.10	-0.0056803	0.797883
ENSG00000059915.15	-0.00648609	0.559101
ENSG00000061273.16	-0.00502287	0.214995
ENSG00000062096.13	0.063341	0.860437
ENSG00000062282.13	-0.00192559	0.584925
ENSG00000062524.14	-0.032401	0.494109
ENSG00000064012.20	0.0039426	0.755396
ENSG00000064309.13	-0.0264592	0.496159
ENSG00000064601.15	-0.00038942	0.783819
ENSG00000064932.14	-0.00146059	0.626682
ENSG00000065320.7	0.00558296	0.650909
ENSG00000065923.8	0.00205926	0.754236
ENSG00000067182.6	-0.00220857	0.255386
ENSG00000067704.9	-0.00125373	0.755869
ENSG00000067829.17	-0.00960279	0.235127
ENSG00000068137.13	-0.00179518	0.712234
ENSG00000068305.16	0.0103599	0.287658
ENSG00000068383.17	0.00129334	0.9144
ENSG00000068615.15	0.00911436	0.616791
ENSG00000069424.13	-0.0070644	0.536988
ENSG00000070047.10	-0.00528433	0.558948
ENSG00000070985.12	-0.0344363	0.749785
ENSG00000071282.10	-0.00322074	0.516131
ENSG00000072163.17	-0.00555755	0.477304
ENSG00000072518.19	-0.00046938	0.93685
ENSG00000072736.17	0.020003	0.143695
ENSG00000072778.18	-0.00163442	0.163776
ENSG00000074276.9	0.0481865	0.0901118
ENSG00000075975.14	-0.000286257	0.957355
ENSG00000076067.10	0.00735714	0.537885
ENSG00000076108.10	0.00193553	0.650457
ENSG00000076344.14	-0.00494484	0.897461
ENSG00000076706.13	0.0037137	0.0490005
ENSG00000077092.17	-0.0111856	0.615858
ENSG00000077097.12	-0.000487205	0.562782
ENSG00000077150.16	-0.00674584	0.158838
ENSG00000078061.11	-0.0020769	0.787294
ENSG00000078814.14	0.00151985	0.896984
ENSG00000081181.6	-0.00248344	0.863219
ENSG00000082014.15	0.0044561	0.768673
ENSG00000083812.10	0.0328843	0.542368
ENSG00000084693.14	-0.0100873	0.425291
ENSG00000084754.9	-0.00520744	0.0716717
ENSG00000086159.11	-0.0396709	0.847205
ENSG00000087087.17	-0.0015515	0.763779
ENSG00000087191.11	0.000543711	0.823305
ENSG00000088038.16	-0.0187461	0.0499878
ENSG00000089050.13	0.00597133	0.591921
ENSG00000089163.4	-0.00469141	0.979931
ENSG00000089486.15	-0.0187987	0.13278
ENSG00000089820.14	-0.00860929	0.195665
ENSG00000090097.19	-0.00262425	0.676629
ENSG00000090975.11	0.00543227	0.77334
ENSG00000091622.14	-0.00297606	0.85891
ENSG00000092010.13	-0.00536689	0.00437855
ENSG00000092051.15	-0.232706	0.214655
ENSG00000092108.19	-0.0085261	0.535663
ENSG00000092758.14	0.00279822	0.895132
ENSG00000092820.16	-0.000179659	0.795871
ENSG00000093144.17	0.000276321	0.947563
ENSG00000096063.13	-0.00158921	0.706337
ENSG00000096384.18	-7.57804e-05	0.751237
ENSG00000099365.8	-0.171777	0.439263
ENSG00000099377.12	-0.00179405	0.895063
ENSG00000099795.5	-0.008348	0.119967
ENSG00000099797.10	-0.00100584	0.782732
ENSG00000099800.6	-0.00563127	0.282598
ENSG00000099817.10	-0.0072712	0.0832064
ENSG00000099821.12	-0.0130052	0.167249
ENSG00000099822.2	-0.420584	0.207932
ENSG00000099899.13	-0.019091	0.0976062
ENSG00000099904.14	-0.016842	0.0601042
ENSG00000099956.16	-0.0193373	0.00352081
ENSG00000099957.15	-0.177303	0.163248
ENSG00000099958.13	-0.0156671	0.213674
ENSG00000099960.11	-0.012449	0.436695
ENSG00000100078.3	-0.0672018	0.359964
ENSG00000100079.6	-0.0538819	0.420128
ENSG00000100139.12	0.000525954	0.810989
ENSG00000100196.9	0.00128276	0.873786
ENSG00000100201.17	-0.00118399	0.350641
ENSG00000100220.10	-0.0118476	0.0788887
ENSG00000100239.14	-0.00396965	0.630384
ENSG00000100241.19	-0.00541963	0.24191
ENSG00000100276.9	0.0250152	0.392604
ENSG00000100359.19	-0.00680147	0.217557
ENSG00000100417.10	0.00279239	0.794416
ENSG00000100433.14	0.171481	0.00251976
ENSG00000100522.7	-0.00888072	0.546875
ENSG00000100767.14	-0.00796084	0.41444
ENSG00000100908.12	-0.0468312	0.0511964
ENSG00000100918.11	-0.0861429	0.00677085
ENSG00000100979.13	-7.60707e-05	0.951602
ENSG00000100982.10	-0.0117276	0.291104
ENSG00000100991.10	0.00170981	0.380782
ENSG00000101003.9	0.00889984	0.472096
ENSG00000101004.13	0.0113912	0.286963
ENSG00000101082.12	-0.063426	0.206005
ENSG00000101084.15	-0.0093271	0.486744
ENSG00000101158.11	-0.00206502	0.629141
ENSG00000101160.12	-0.00242458	0.0570297
ENSG00000101190.11	-0.00762216	0.803861
ENSG00000101220.16	-0.00661905	0.386173
ENSG00000101298.12	-0.0230652	0.448145
ENSG00000101343.13	0.00154265	0.903404
ENSG00000101384.10	0.00127482	0.263286
ENSG00000101460.11	-0.00116183	0.905266
ENSG00000101464.9	0.0033577	0.440678
ENSG00000101882.8	-0.00837173	0.784758
ENSG00000102007.9	-0.0004233	0.758399
ENSG00000102109.8	-0.0308473	0.387723
ENSG00000102144.12	-3.8243e-05	0.953112
ENSG00000102302.7	0.0327801	0.0134954
ENSG00000102362.14	0.00947909	0.271562
ENSG00000102710.18	-0.00656734	0.537151
ENSG00000102854.13	0.00465358	0.0447889
ENSG00000102978.11	-0.00221774	0.805249
ENSG00000102984.13	0.032412	0.653328
ENSG00000103024.6	-0.0147825	0.0592383
ENSG00000103044.9	-0.00178222	0.176686
ENSG00000103067.10	0.00130184	0.525453
ENSG00000103111.13	0.0115743	0.252983
ENSG00000103126.13	-0.0161091	0.213808
ENSG00000103264.14	-0.0140828	0.413379
ENSG00000103351.11	-0.0514862	0.1033
ENSG00000103415.10	-0.00170661	0.802785
ENSG00000103426.11	-4.63914	0.290247
ENSG00000103479.13	0.000909418	0.871725
ENSG00000103510.18	-0.0120637	0.496248
ENSG00000104341.15	0.000883744	0.573137
ENSG00000104524.12	0.00190859	0.856442
ENSG00000104660.16	-0.0179598	0.203628
ENSG00000104679.9	-0.00491763	0.747323
ENSG00000104859.13	-0.0237913	0.0197489
ENSG00000104903.4	-0.049472	0.287778
ENSG00000104936.16	-0.00758028	0.319736
ENSG00000104964.13	-0.00154086	0.0757822
ENSG00000105135.14	-0.00235445	0.57957
ENSG00000105137.11	0.00852898	0.50295
ENSG00000105258.7	-0.00376415	0.767177
ENSG00000105261.6	-1.22065	0.50493
ENSG00000105325.12	-0.00825639	0.334631
ENSG00000105355.7	0.00339127	0.290185
ENSG00000105364.12	-0.00912578	0.212786
ENSG00000105373.17	-0.00310032	0.0271592
ENSG00000105556.9	-0.0234944	0.0978548
ENSG00000105617.3	-0.105461	0.0200656
ENSG00000105655.17	-0.00244679	0.244543
ENSG00000105656.11	-0.0200187	0.406521
ENSG00000105662.14	-0.00676602	0.697041
ENSG00000105664.9	-0.00158639	0.427914
ENSG00000105701.14	-0.00257054	0.165786
ENSG00000105708.8	0.0459823	0.343777
ENSG00000105856.12	0.0040923	0.57337
ENSG00000105877.16	-0.0150398	0.770748
ENSG00000105996.6	-0.209862	0.195617
ENSG00000106077.17	-0.00673351	0.236175
ENSG00000106123.10	-0.000628227	0.636225
ENSG00000106346.10	-0.00896922	0.624943
ENSG00000106367.12	-0.00449898	0.473104
ENSG00000106484.13	-0.0028342	0.393593
ENSG00000106624.7	-0.000246347	0.613293
ENSG00000106628.9	-0.000231275	0.943641
ENSG00000106948.15	-0.0152185	0.125993
ENSG00000106991.12	-0.00343956	0.30812
ENSG00000107159.11	-0.00154524	0.648207
ENSG00000107201.8	0.00235509	0.418532
ENSG00000107404.16	-0.00786206	0.0910125
ENSG00000107581.11	0.00158554	0.408796
ENSG00000107672.13	-0.00870276	0.636698
ENSG00000107736.18	0.00472524	0.25913
ENSG00000107829.12	-0.00375325	0.592302
ENSG00000107859.8	-0.536325	0.827089
ENSG00000107872.11	-0.0423824	0.105357
ENSG00000107874.9	-0.00978286	0.397022
ENSG00000107902.12	-0.00531455	0.695467
ENSG00000108262.14	-0.00287523	0.515251
ENSG00000108309.11	-0.00589386	0.867363
ENSG00000108556.7	0.0493354	0.835478
ENSG00000108591.8	-0.0175795	0.36876
ENSG00000108592.15	0.000281595	0.957415
ENSG00000108602.16	-0.00670975	0.401907
ENSG00000108604.14	0.00106088	0.657766
ENSG00000108788.10	-0.00648281	0.570535
ENSG00000108797.10	0.00773208	0.647856
ENSG00000108799.11	-0.00608285	0.680215
ENSG00000108840.14	0.00887133	0.226625
ENSG00000108846.14	0.00164223	0.180519
ENSG00000108854.14	0.00635291	0.551018
ENSG00000108924.12	-0.0186879	0.724282
ENSG00000108963.16	-0.0647376	0.0303661
ENSG00000109519.11	-0.0237593	0.0396588
ENSG00000109686.15	0.00942328	0.233397
ENSG00000109956.11	-0.000456431	0.961035
ENSG00000110042.6	0.00204507	0.282646
ENSG00000110395.4	0.0205795	0.019656
ENSG00000110697.11	-0.00968576	0.131588
ENSG00000110700.5	-0.0026453	0.048796
ENSG00000110711.8	-0.017526	0.0172651
ENSG00000110925.5	-0.010024	0.435999
ENSG00000111077.16	-0.00552508	0.51718
ENSG00000111087.8	-0.0672175	0.449475
ENSG00000111276.9	-0.00918113	0.253712
ENSG00000111344.10	-0.0100534	0.505128
ENSG00000111445.12	-0.0106317	0.460893
ENSG00000111669.13	-0.00122395	0.0864551
ENSG00000111671.8	-0.010848	0.639658
ENSG00000112137.15	-0.0584275	0.237954
ENSG00000112511.16	-0.01841	0.0602446
ENSG00000112514.14	0.000313857	0.915971
ENSG00000113716.11	0.0162552	0.0799064
ENSG00000113758.12	0.00139278	0.576556
ENSG00000113763.9	0.148035	0.0160876
ENSG00000114354.11	-0.000589081	0.820439
ENSG00000115053.14	-0.000269867	0.706039
ENSG00000115155.15	-0.0548729	0.476594
ENSG00000115232.12	-0.0173703	0.564797
ENSG00000115275.10	-0.006775	0.243062
ENSG00000115297.10	0.0789702	0.0644677
ENSG00000115310.16	0.000558181	0.611359
ENSG00000115325.12	-0.0489523	0.0451656
ENSG00000115657.11	-0.0285819	0.505482
ENSG00000115841.18	0.120088	0.0282399
ENSG00000116005.10	-0.00268262	0.627293
ENSG00000116161.16	-0.000831593	0.888151
ENSG00000116176.6	-1.83747	0.176407
ENSG00000116221.14	-0.00335841	0.498033
ENSG00000116254.16	-0.00785962	0.94674
ENSG00000116329.9	0.15611	0.704833
ENSG00000116478.10	-0.00549882	0.108506
ENSG00000116957.11	-8.61796e-05	0.996657
ENSG00000117308.13	-0.00403534	0.368253
ENSG00000117411.15	-0.000599797	0.888218
ENSG00000117419.13	-0.0088007	0.324658
ENSG00000118094.10	0.156253	0.315209
ENSG00000118518.14	0.00225599	0.88807
ENSG00000118873.14	0.00492493	0.509381
ENSG00000118997.12	0.110981	0.739491
ENSG00000119041.9	0.00912084	0.523339
ENSG00000119396.9	-0.000525682	0.896128
ENSG00000119397.15	-0.00867971	0.545358
ENSG00000119408.15	-0.000471523	0.956113
ENSG00000119522.14	0.00685492	0.617056
ENSG00000119689.13	-0.00480755	0.407279
ENSG00000119698.10	-0.0121533	0.820026
ENSG00000119915.4	0.0213689	0.856245
ENSG00000119986.6	-0.000263198	0.953894
ENSG00000120333.4	0.00213314	0.931553
ENSG00000120699.11	-0.0221313	0.218463
ENSG00000120784.14	0.0429869	0.24376
ENSG00000120860.9	-0.024486	0.288847
ENSG00000120948.14	-0.0124565	0.0859251
ENSG00000121053.5	1.48136	0.158532
ENSG00000121075.8	0.000791103	0.976302
ENSG00000121653.10	-0.0531292	0.178821
ENSG00000122033.13	-0.0125914	0.32689
ENSG00000122034.11	-0.0019981	0.647096
ENSG00000122203.13	-0.00335165	0.620905
ENSG00000122674.10	-0.0281267	0.507949
ENSG00000122696.11	-0.0151933	0.669317
ENSG00000122729.17	0.000468935	0.914788
ENSG00000122735.14	-0.0380479	0.886506
ENSG00000122971.7	-0.0138828	0.337811
ENSG00000123136.13	-0.0069158	0.128287
ENSG00000123143.11	-0.00658365	0.0394808
ENSG00000123146.18	-0.00441036	0.221891
ENSG00000123329.16	-0.0284512	0.0990311
ENSG00000123342.14	0.00523867	0.50875
ENSG00000123395.13	-0.0144454	0.34218
ENSG00000123485.10	-0.00243611	0.822971
ENSG00000123737.11	0.00520523	0.629718
ENSG00000123870.10	0.0992631	0.154066
ENSG00000124151.17	0.00529772	0.114397
ENSG00000124541.6	-0.00586967	0.455965
ENSG00000124574.13	-0.0162944	0.236156
ENSG00000124587.12	-0.00991723	0.244264
ENSG00000124593.13	-0.0203054	0.227685
ENSG00000124713.5	-0.288863	0.458508
ENSG00000124939.5	0.163037	0.502255
ENSG00000125037.11	-0.0197694	0.0346072
ENSG00000125148.6	-8.56503e-05	0.800381
ENSG00000125149.10	0.0411154	0.0330482
ENSG00000125170.9	0.00612849	0.442588
ENSG00000125257.12	0.00306544	0.664697
ENSG00000125355.14	0.0794843	0.00508233
ENSG00000125520.12	-0.00668505	0.171474
ENSG00000125650.4	0.017867	0.89081
ENSG00000125652.6	-0.0187905	0.0618179
ENSG00000125741.4	0.00837828	0.560324
ENSG00000125753.12	-0.00535475	0.0339748
ENSG00000125775.13	-0.00549462	0.282837
ENSG00000126010.5	1.19965	0.205771
ENSG00000126246.8	-0.181284	0.0837056
ENSG00000126247.9	-0.001963	0.102705
ENSG00000126464.12	-0.00817153	0.317437
ENSG00000126500.3	0.0649222	0.677542
ENSG00000126603.7	0.00594474	0.424654
ENSG00000126778.8	-0.0174597	0.367655
ENSG00000126895.12	-0.230015	0.495839
ENSG00000127311.8	0.0469323	0.350337
ENSG00000127533.3	-0.0514388	0.347904
ENSG00000127564.15	-0.00211025	0.838291
ENSG00000127585.10	-0.0331834	0.537745
ENSG00000127948.12	0.00240624	0.253834
ENSG00000128016.5	-0.00122747	0.203861
ENSG00000128191.12	0.00528337	0.547655
ENSG00000128283.6	-0.00174081	0.528698
ENSG00000128322.6	-5.93205	0.135449
ENSG00000128346.9	0.00973881	0.882409
ENSG00000128463.11	-0.0137083	0.0920693
ENSG00000128482.14	-0.00325765	0.978411
ENSG00000128563.12	-0.00825139	0.508311
ENSG00000128564.6	-0.264437	0.0940431
ENSG00000128595.15	0.00260914	0.127543
ENSG00000128617.2	0.0155994	0.901827
ENSG00000128709.11	-0.00363523	0.883119
ENSG00000129103.16	0.00416789	0.119211
ENSG00000129195.14	-0.00340303	0.84106
ENSG00000129347.18	-0.000331314	0.965102
ENSG00000129451.10	0.00130242	0.150417
ENSG00000129691.14	0.000387727	0.94148
ENSG00000129910.6	0.100643	0.7503
ENSG00000129951.17	-0.0132606	0.900758
ENSG00000129968.14	-0.0219747	0.0971749
ENSG00000130244.11	-0.0175223	0.375016
ENSG00000130487.5	-0.000266252	0.667865
ENSG00000130511.14	-0.0118612	0.167455
ENSG00000130545.14	-0.0180863	0.188274
ENSG00000130584.9	-0.0514137	0.238413
ENSG00000130702.12	0.000168174	0.845606
ENSG00000130706.11	-0.00447179	0.178281
ENSG00000130714.14	-0.0254543	0.145934
ENSG00000130717.11	-0.0103468	0.449273
ENSG00000130734.8	-0.00413612	0.780926
ENSG00000130748.6	-0.0501747	0.137415
ENSG00000130751.8	-0.0616911	0.40825
ENSG00000130758.6	-0.0250697	0.272839
ENSG00000130811.9	-0.00893837	0.0270271
ENSG00000130812.9	-0.824087	0.217998
ENSG00000130813.16	-0.014253	0.214258
ENSG00000130826.14	-0.0025541	0.517871
ENSG00000130827.6	0.00269912	0.602924
ENSG00000130830.13	-0.0253508	0.140395
ENSG00000130876.10	-0.0102385	0.797285
ENSG00000130881.12	0.00694945	0.243777
ENSG00000131149.16	0.00445208	0.263464
ENSG00000131153.7	-0.00197904	0.873419
ENSG00000131188.10	-0.0111345	0.812525
ENSG00000131236.15	-0.0010378	0.309722
ENSG00000131238.15	-0.00130848	0.614666
ENSG00000131389.15	-0.00145456	0.701131
ENSG00000131470.13	0.0315293	0.519163
ENSG00000131584.17	-0.00208972	0.642431
ENSG00000131650.12	-0.00602514	0.806498
ENSG00000131788.14	-0.00205437	0.783903
ENSG00000131899.9	0.00409088	0.632439
ENSG00000132153.13	-0.00388545	0.49873
ENSG00000132155.10	-2.97126e-05	0.982723
ENSG00000132313.13	-0.0269572	0.133947
ENSG00000132388.11	-0.00923081	0.378043
ENSG00000132507.16	-0.00166672	0.0629727
ENSG00000132613.13	0.00128694	0.862358
ENSG00000132622.9	-0.00435419	0.913253
ENSG00000132793.10	0.00232675	0.751883
ENSG00000133019.10	0.021316	0.273267
ENSG00000133055.7	0.408864	0.541938
ENSG00000133318.12	-0.00248161	0.272986
ENSG00000133794.16	-0.00267419	0.948491
ENSG00000133805.14	-0.0366791	0.0982094
ENSG00000133961.18	0.00225631	0.757839
ENSG00000134013.14	0.005587	0.0394442
ENSG00000134317.16	0.00164238	0.412935
ENSG00000134318.12	0.00598753	0.251874
ENSG00000134398.11	-0.00223123	0.663904
ENSG00000134480.12	-0.0184366	0.472324
ENSG00000134668.11	-0.00931483	0.0455688
ENSG00000134684.9	-0.00337633	0.406713
ENSG00000134697.11	-0.00641832	0.315951
ENSG00000134769.20	0.00215882	0.835667
ENSG00000134780.8	-0.00866483	0.856541
ENSG00000135093.11	0.0109036	0.745602
ENSG00000135144.6	-0.0264236	0.441529
ENSG00000135365.14	-0.00910119	0.578663
ENSG00000135414.8	-0.00204901	0.892665
ENSG00000135451.11	-0.00180673	0.852891
ENSG00000135597.17	0.0112017	0.404734
ENSG00000135678.10	0.00454571	0.0655974
ENSG00000135749.17	0.00616891	0.776652
ENSG00000135778.10	-0.0121872	0.442034
ENSG00000135945.8	0.00382092	0.776673
ENSG00000136048.12	-0.00841092	0.20323
ENSG00000136059.13	-0.00282409	0.490741
ENSG00000136478.6	0.0157127	0.0371908
ENSG00000136854.16	0.0233434	0.0711958
ENSG00000136877.13	-0.0064038	0.312609
ENSG00000136881.10	0.00578801	0.00163726
ENSG00000136930.11	-0.000523074	0.841083
ENSG00000137070.16	-0.0202406	0.642993
ENSG00000137154.11	-0.000278449	0.126818
ENSG00000137200.11	-0.00232435	0.781854
ENSG00000137267.5	-0.00134861	0.855844
ENSG00000137274.11	-0.00531952	0.80604
ENSG00000137563.10	0.00213762	0.624822
ENSG00000137575.10	-0.00188022	0.484872
ENSG00000137825.9	0.00362592	0.946516
ENSG00000137841.10	-0.0419629	0.0246917
ENSG00000137843.10	0.204972	0.289282
ENSG00000137877.9	-0.00325649	0.776659
ENSG00000138061.10	-0.00440199	0.494676
ENSG00000138073.12	-0.00752242	0.347537
ENSG00000138100.12	-0.265974	0.43838
ENSG00000138193.13	0.00995933	0.035031
ENSG00000138794.8	0.00808504	0.537527
ENSG00000138834.11	-0.000671323	0.813317
ENSG00000139044.9	0.00460836	0.399991
ENSG00000139540.10	0.00834124	0.00176735
ENSG00000139645.9	0.005767	0.367387
ENSG00000139835.12	0.0149354	0.270733
ENSG00000140093.8	0.0233087	0.148375
ENSG00000140104.12	-0.0429592	0.16687
ENSG00000140199.10	0.0018011	0.763467
ENSG00000140854.11	-0.00282713	0.862704
ENSG00000140859.14	-0.000465817	0.917635
ENSG00000140876.10	0.355115	0.00318933
ENSG00000140931.18	-0.00405983	0.426843
ENSG00000140939.13	0.00400368	0.526042
ENSG00000140990.13	-0.0111031	0.0639233
ENSG00000141068.12	0.00686117	0.618631
ENSG00000141179.12	0.0120025	0.176286
ENSG00000141219.14	0.0360778	0.0806818
ENSG00000141349.7	-0.0015004	0.820805
ENSG00000141401.10	-0.00106863	0.824214
ENSG00000141447.15	-0.017205	0.116044
ENSG00000141503.14	-0.00356593	0.306582
ENSG00000141522.10	6.72002e-05	0.972027
ENSG00000141564.12	0.0152994	0.166932
ENSG00000141744.3	0.0302296	0.0352877
ENSG00000141934.8	-0.00473213	0.127473
ENSG00000142186.15	-0.00751871	0.179594
ENSG00000142197.11	0.00770976	0.145409
ENSG00000142208.14	-0.00581008	0.174088
ENSG00000142632.15	0.00138824	0.80215
ENSG00000143125.5	0.117579	0.731258
ENSG00000143157.10	-0.000372025	0.850499
ENSG00000143198.11	-0.00161974	0.648288
ENSG00000143318.11	0.00563311	0.508217
ENSG00000143340.6	-0.134023	0.566559
ENSG00000143382.12	0.000593267	0.851135
ENSG00000143442.20	-0.00131648	0.744106
ENSG00000143494.14	0.0138942	0.527766
ENSG00000143552.8	1.20356	0.00341305
ENSG00000143553.9	0.00190823	0.889363
ENSG00000143621.15	-0.0012576	0.445993
ENSG00000143748.16	-0.0160186	0.49166
ENSG00000143819.11	-0.00239895	0.359385
ENSG00000143845.13	-0.0019646	0.870215
ENSG00000143862.6	-0.0248817	0.0400975
ENSG00000143952.18	-0.0267306	0.162173
ENSG00000143977.12	-0.0119222	0.144217
ENSG00000143994.12	0.227388	0.266478
ENSG00000144045.12	0.0162733	0.332238
ENSG00000144395.16	0.0115686	0.838855
ENSG00000144596.10	-0.177273	0.243459
ENSG00000144597.12	-0.0112168	0.412136
ENSG00000144746.6	0.00213454	0.505509
ENSG00000144857.13	-0.00247801	0.829269
ENSG00000145002.11	0.585513	0.698602
ENSG00000145244.10	0.0698719	0.0795722
ENSG00000145246.12	0.0075613	0.440222
ENSG00000145386.8	0.0054455	0.390595
ENSG00000145416.12	-0.00466009	0.850165
ENSG00000145715.13	-0.00284126	0.739085
ENSG00000145721.10	0.119983	0.817359
ENSG00000145901.13	-0.00140406	0.597719
ENSG00000146223.13	-0.00327084	0.407009
ENSG00000146426.16	-0.00523482	0.929033
ENSG00000146477.5	0.00919015	0.761097
ENSG00000146556.13	-0.0124155	0.837147
ENSG00000146830.9	0.00331758	0.327678
ENSG00000147119.3	0.0208775	0.744001
ENSG00000147465.10	-0.0158659	0.8726
ENSG00000147571.4	-0.00175955	0.339027
ENSG00000147573.15	0.0843828	0.125822
ENSG00000147912.11	-0.0376298	0.487559
ENSG00000148082.8	-0.0412885	0.0749302
ENSG00000148204.10	-0.113176	0.672722
ENSG00000148337.18	0.00215328	0.614411
ENSG00000148358.18	0.00635547	0.0785995
ENSG00000148362.9	-0.00975802	0.209573
ENSG00000148600.13	0.0455387	0.000348592
ENSG00000148702.13	-0.0975975	0.361866
ENSG00000148824.17	-0.00836184	0.804572
ENSG00000148925.9	-0.0216481	0.126751
ENSG00000149179.12	-0.0224455	0.158229
ENSG00000149182.13	-0.0077211	0.270426
ENSG00000149243.14	-0.0699432	0.317547
ENSG00000149273.13	-0.000359281	0.244787
ENSG00000149328.13	0.0107076	0.203517
ENSG00000149346.13	0.0554617	0.0145327
ENSG00000149489.7	-0.0930163	0.37564
ENSG00000149541.8	-0.00147691	0.869923
ENSG00000149782.10	0.00084853	0.819442
ENSG00000149922.9	-0.0177776	0.294918
ENSG00000149923.12	-0.00317249	0.272767
ENSG00000149929.14	-0.00302766	0.837423
ENSG00000149930.16	0.00392567	0.438738
ENSG00000149968.10	-0.00541828	0.489766
ENSG00000149970.13	0.0207613	0.828893
ENSG00000150281.6	-0.0324773	0.229804
ENSG00000151117.7	0.0297775	0.35977
ENSG00000151303.11	0.0997132	0.0690063
ENSG00000151364.14	0.000584004	0.985021
ENSG00000151365.2	-0.964833	0.362691
ENSG00000151366.11	0.00311158	0.18418
ENSG00000152382.5	0.00622319	0.741099
ENSG00000153162.8	0.00969658	0.767043
ENSG00000153944.9	0.003922	0.103298
ENSG00000154040.19	-0.0158934	0.609057
ENSG00000154146.11	0.0342062	0.25368
ENSG00000154175.15	-0.0210733	0.188527
ENSG00000154222.13	-0.00721659	0.49507
ENSG00000154639.17	0.000438202	0.827941
ENSG00000154640.13	-0.00345939	0.713385
ENSG00000154864.10	0.038176	0.103015
ENSG00000154945.6	0.021839	0.00176756
ENSG00000155026.15	0.518163	0.749535
ENSG00000155252.13	-0.00555432	0.483611
ENSG00000155363.17	-0.00080391	0.84406
ENSG00000155366.15	-0.00165893	0.356539
ENSG00000155506.15	0.00191141	0.377901
ENSG00000155749.11	1.04511	0.0085601
ENSG00000155850.7	0.00688692	0.000126047
ENSG00000155974.10	-0.0222346	0.578447
ENSG00000156096.11	-3.18421	0.111111
ENSG00000156381.7	0.000523199	0.944236
ENSG00000156642.15	0.00184925	0.672792
ENSG00000157017.14	0.00201546	0.994473
ENSG00000157020.16	-0.00417376	0.24681
ENSG00000157077.13	0.00364501	0.671342
ENSG00000157111.11	0.0124481	0.709715
ENSG00000157216.14	-0.00500873	0.475898
ENSG00000157368.9	-0.0238115	0.643912
ENSG00000157593.15	0.00156513	0.711782
ENSG00000157833.11	0.0129835	0.463608
ENSG00000157851.15	-0.00623926	0.798768
ENSG00000157856.9	-0.211503	0.713623
ENSG00000158008.8	0.225966	0.0188939
ENSG00000158014.13	0.00969193	0.00138229
ENSG00000158158.10	-0.00292023	0.790834
ENSG00000158417.9	0.000279152	0.89324
ENSG00000158483.14	-0.0181721	0.777489
ENSG00000158526.7	-0.0103263	0.267385
ENSG00000158552.11	0.00760049	0.579731
ENSG00000158578.17	0.898517	0.0669251
ENSG00000158623.13	-0.0119426	0.189148
ENSG00000158792.14	-0.0171473	0.466887
ENSG00000158828.5	-0.00175041	0.915527
ENSG00000159023.17	-0.00138487	0.780692
ENSG00000159184.7	0.00312385	0.19872
ENSG00000159247.11	-0.0209973	0.627383
ENSG00000159263.14	-0.00744216	0.544647
ENSG00000159267.13	0.0144017	0.147209
ENSG00000159374.16	-0.0100872	0.902315
ENSG00000159377.9	-0.000874727	0.466853
ENSG00000159792.8	0.00824991	0.196666
ENSG00000159842.13	-0.00368264	0.39113
ENSG00000160050.13	-0.0231463	0.340679
ENSG00000160111.11	0.0117497	0.0192913
ENSG00000160172.9	-0.0773168	0.407989
ENSG00000160214.11	-0.00140144	0.812264
ENSG00000160325.13	-0.00136169	0.855538
ENSG00000160326.12	-0.0185193	0.0900018
ENSG00000160404.16	-0.0188164	0.467371
ENSG00000160469.15	0.0199658	0.524282
ENSG00000160781.14	0.0170215	0.162868
ENSG00000160818.15	-0.00637824	0.511868
ENSG00000160883.9	-0.0411772	0.113513
ENSG00000160951.3	-0.0467462	0.807076
ENSG00000161082.11	-0.0553609	0.713573
ENSG00000161091.11	-0.00984466	0.159993
ENSG00000161281.9	-0.0318987	0.395023
ENSG00000161395.11	0.000444438	0.83245
ENSG00000161682.13	-0.000894241	0.969919
ENSG00000161800.11	0.00545352	0.364716
ENSG00000162006.8	-0.385638	0.589354
ENSG00000162066.13	-0.0190635	0.524839
ENSG00000162078.10	-0.0074936	0.513289
ENSG00000162241.11	-0.0891304	0.156021
ENSG00000162434.10	-0.00117484	0.713974
ENSG00000162437.13	0.0163034	0.308851
ENSG00000162522.9	-0.000503963	0.647262
ENSG00000162572.18	0.00127438	0.965548
ENSG00000162728.4	0.785751	0.619497
ENSG00000162729.12	-0.00379387	0.311177
ENSG00000162885.11	0.0411217	0.278047
ENSG00000162892.14	0.0361932	0.0233881
ENSG00000162894.10	-0.0113419	0.41482
ENSG00000162976.11	-0.00802296	0.663955
ENSG00000163154.5	-0.115302	0.0680327
ENSG00000163155.10	-0.026657	0.408096
ENSG00000163156.10	-0.0113151	0.242653
ENSG00000163159.10	-0.00847602	0.203911
ENSG00000163249.8	0.00229505	0.76667
ENSG00000163251.3	0.0076183	0.00150849
ENSG00000163380.14	-0.197836	0.737167
ENSG00000163382.10	0.000135843	0.972993
ENSG00000163485.14	-0.0034712	0.953671
ENSG00000163499.10	0.0999061	0.0923417
ENSG00000163697.15	0.0118963	0.26137
ENSG00000163703.16	-0.0137673	0.22488
ENSG00000163704.10	0.0145777	0.706228
ENSG00000163794.6	-0.101261	0.538512
ENSG00000163806.14	0.159371	0.557982
ENSG00000163879.10	-0.0153215	0.465294
ENSG00000163938.15	-0.00235478	0.328344
ENSG00000164054.14	-0.000497619	0.593372
ENSG00000164062.11	-0.005694	0.163178
ENSG00000164070.10	0.00805271	0.198431
ENSG00000164099.3	-0.00690332	0.534468
ENSG00000164296.6	0.219174	0.00249983
ENSG00000164597.12	0.0072948	0.425224
ENSG00000164649.18	0.00789749	0.546721
ENSG00000164663.12	0.00967905	0.730717
ENSG00000164674.14	-0.0491301	0.257015
ENSG00000164742.13	0.00171167	0.907643
ENSG00000164776.8	-0.000543053	0.994935
ENSG00000164808.15	0.00501757	0.464891
ENSG00000164855.14	-0.0023657	0.431468
ENSG00000164889.11	0.00322501	0.487573
ENSG00000164896.18	-0.000885195	0.822584
ENSG00000164902.12	0.0320434	0.0589937
ENSG00000164932.11	-0.000115324	0.962372
ENSG00000165125.16	0.00157753	0.796589
ENSG00000165131.6	4.11985	0.208157
ENSG00000165458.12	-0.0013516	0.735878
ENSG00000165462.5	0.0766456	0.952454
ENSG00000165905.15	-0.00488023	0.427727
ENSG00000165983.13	0.0193367	0.0184549
ENSG00000165985.9	0.152977	0.00236466
ENSG00000166004.13	0.0436328	0.0766272
ENSG00000166171.11	-0.0313274	0.165789
ENSG00000166311.8	0.00936422	0.39084
ENSG00000166313.17	0.00734929	0.599831
ENSG00000166428.11	-0.108694	0.210789
ENSG00000166507.15	-0.13473	0.570635
ENSG00000166575.15	0.0196904	0.177163
ENSG00000166763.7	0.515775	0.166236
ENSG00000166816.12	0.00594606	0.686495
ENSG00000166851.13	-0.00034895	0.92954
ENSG00000166856.2	0.883483	0.134798
ENSG00000166860.2	0.0468126	0.0740459
ENSG00000166960.15	-0.676025	0.435391
ENSG00000166971.15	0.00608436	0.716078
ENSG00000167094.14	-0.416523	0.438479
ENSG00000167105.6	-0.00813312	0.763527
ENSG00000167106.10	-0.0044985	0.286355
ENSG00000167118.9	-0.0046247	0.512298
ENSG00000167220.10	0.00414359	0.869898
ENSG00000167280.15	0.000689191	0.819908
ENSG00000167281.17	-0.0213281	0.564898
ENSG00000167311.12	-0.109133	0.573524
ENSG00000167460.13	-0.00053683	0.442083
ENSG00000167468.15	-0.00124136	0.444582
ENSG00000167513.7	0.000850342	0.914065
ENSG00000167535.6	0.00364222	0.537807
ENSG00000167543.14	-0.00816098	0.233571
ENSG00000167549.17	0.00934965	0.425291
ENSG00000167644.10	-0.000940692	0.622922
ENSG00000167645.15	-0.00112109	0.900405
ENSG00000167670.14	-0.00309465	0.712624
ENSG00000167671.10	-0.0072271	0.0991292
ENSG00000167748.9	0.0319531	0.506097
ENSG00000167771.5	0.00466863	0.793421
ENSG00000167778.7	-0.0043853	0.578805
ENSG00000167863.10	0.00106457	0.750909
ENSG00000167889.11	0.0255853	0.441798
ENSG00000167930.14	-0.00205649	0.697424
ENSG00000167967.14	-0.0105108	0.386653
ENSG00000167968.11	0.142101	0.0232072
ENSG00000167969.11	-0.00749951	0.307922
ENSG00000167984.15	-0.0869379	0.0912094
ENSG00000168056.13	-0.00128934	0.700641
ENSG00000168060.13	-0.0878672	0.281321
ENSG00000168061.12	-0.0177999	0.322262
ENSG00000168234.11	-0.00252693	0.882407
ENSG00000168256.16	-0.00454391	0.686652
ENSG00000168268.9	-0.000429495	0.852391
ENSG00000168350.7	-0.00143902	0.811893
ENSG00000168427.8	-0.452848	0.122571
ENSG00000168477.16	-0.0131797	0.469969
ENSG00000168743.11	0.00126811	0.549156
ENSG00000168802.11	0.0147228	0.0173143
ENSG00000168827.13	0.0194911	0.0343293
ENSG00000168913.6	-0.0111815	0.857873
ENSG00000168995.12	-0.338596	0.0744741
ENSG00000169188.4	-0.00362	0.682987
ENSG00000169258.6	0.0164832	0.0680195
ENSG00000169372.11	0.0127074	0.799069
ENSG00000169583.12	0.00254535	0.0657643
ENSG00000169641.12	0.00971566	0.183296
ENSG00000169692.11	-0.00102914	0.638682
ENSG00000169718.16	0.00110796	0.665476
ENSG00000169727.11	-0.000671285	0.861869
ENSG00000169764.13	-0.00979908	0.136095
ENSG00000169885.8	0.180361	0.203152
ENSG00000169962.4	-0.0989854	0.315838
ENSG00000169972.10	-0.0096896	0.473668
ENSG00000169994.17	0.0112261	0.199857
ENSG00000170035.14	0.0011496	0.890381
ENSG00000170049.8	-0.021733	0.740049
ENSG00000170075.8	0.0760959	0.693421
ENSG00000170085.16	-0.0105391	0.729397
ENSG00000170142.10	-0.0120805	0.0976402
ENSG00000170271.9	-0.00650353	0.775484
ENSG00000170291.13	-0.0250089	0.138557
ENSG00000170382.10	0.00548346	0.850218
ENSG00000170423.11	-0.00344828	0.870118
ENSG00000170473.15	-0.0201163	0.0907979
ENSG00000170684.7	-0.0417899	0.168586
ENSG00000170776.18	0.00320478	0.399489
ENSG00000170779.10	0.00150463	0.847535
ENSG00000171103.9	0.0066495	0.864827
ENSG00000171262.10	-0.019671	0.170882
ENSG00000171462.13	0.00874102	0.712888
ENSG00000171570.9	1.79176	0.337563
ENSG00000171603.15	-0.000256591	0.833392
ENSG00000171608.14	-0.0137645	0.201526
ENSG00000171777.14	-0.272606	0.16544
ENSG00000171817.15	-0.0665827	0.685338
ENSG00000171840.10	-0.085863	0.200113
ENSG00000171889.3	0.0136016	0.85472
ENSG00000172059.9	-0.00233643	0.87521
ENSG00000172247.3	-1.26465	0.240478
ENSG00000172346.13	0.0161427	0.49649
ENSG00000172354.8	-0.0018531	0.347795
ENSG00000172367.14	0.0229505	0.163293
ENSG00000172460.13	0.0480456	0.00553451
ENSG00000172476.3	0.0887657	0.634822
ENSG00000172500.11	-0.0121328	0.144261
ENSG00000172531.13	-0.00502264	0.0310119
ENSG00000172543.6	-0.0177265	0.232932
ENSG00000172575.10	-0.0409452	0.186631
ENSG00000172613.6	-0.0179764	0.176426
ENSG00000172640.3	2.36731	0.398327
ENSG00000172650.11	-0.089634	0.922443
ENSG00000172725.12	-0.00645501	0.0399227
ENSG00000172889.14	-0.00642229	0.476353
ENSG00000172935.8	-0.00303591	0.769313
ENSG00000173011.11	-0.0464262	0.0350806
ENSG00000173124.13	0.0287747	0.107574
ENSG00000173137.10	0.00537844	0.62402
ENSG00000173145.10	-0.019519	0.474263
ENSG00000173338.11	0.0763763	0.348101
ENSG00000173418.10	-0.00284243	0.629642
ENSG00000173442.10	-0.00629141	0.095493
ENSG00000173482.15	0.000126461	0.957666
ENSG00000173846.11	-0.0363388	0.0135789
ENSG00000173947.12	-0.0127138	0.602667
ENSG00000174243.8	-0.00781618	0.146295
ENSG00000174292.11	-0.0190909	0.247555
ENSG00000174521.7	-0.0183218	0.812572
ENSG00000174606.11	0.0154831	0.588784
ENSG00000175130.6	-0.00065443	0.567374
ENSG00000175206.9	0.325403	0.716142
ENSG00000175592.7	-0.00453585	0.322659
ENSG00000175602.3	-0.00898779	0.363928
ENSG00000175634.13	-0.00671092	0.378707
ENSG00000176125.4	-0.0107209	0.934468
ENSG00000176728.6	-0.0631879	0.227128
ENSG00000176871.7	-0.002797	0.469068
ENSG00000176884.13	-0.00537161	0.966249
ENSG00000177045.7	-0.0355419	0.42226
ENSG00000177191.2	0.016955	0.332541
ENSG00000177370.4	-0.0544326	0.0561909
ENSG00000177418.2	3.51838	0.0103958
ENSG00000177485.6	0.0375202	0.00234172
ENSG00000177548.11	-5.50815e-05	0.993642
ENSG00000177628.14	0.00349311	0.465893
ENSG00000177731.14	-0.00799038	0.0141141
ENSG00000177791.11	0.159033	0.0764777
ENSG00000177839.6	0.116135	0.00878017
ENSG00000177954.10	-0.000738513	0.257952
ENSG00000178028.12	-0.0137144	0.204035
ENSG00000178149.15	-0.0307714	0.197901
ENSG00000178252.16	0.000607407	0.805875
ENSG00000178297.11	0.403192	0.310239
ENSG00000178342.4	0.887923	0.341016
ENSG00000178460.16	0.26246	3.30905e-05
ENSG00000178814.14	0.00337312	0.586381
ENSG00000178821.11	-0.0810641	0.350513
ENSG00000178836.6	-0.0478391	0.985455
ENSG00000178947.8	-0.032426	0.484017
ENSG00000179051.12	-0.000641642	0.748678
ENSG00000179057.12	-0.0207458	0.856001
ENSG00000179131.7	1.25234	0.68126
ENSG00000179222.16	0.000670005	0.458243
ENSG00000179262.8	0.000420823	0.931123
ENSG00000179270.6	1.83328	0.227193
ENSG00000179271.2	-0.0028211	0.559851
ENSG00000179299.15	0.0213294	0.5494
ENSG00000179361.16	-0.0475154	0.244119
ENSG00000179564.3	-0.586799	0.646908
ENSG00000179832.16	0.00545976	0.230901
ENSG00000179886.5	-0.00849107	0.6901
ENSG00000180061.8	0.0160425	0.65904
ENSG00000180098.8	-0.0293999	0.188334
ENSG00000180279.5	-0.151836	0.793301
ENSG00000180385.7	-0.0264182	0.529529
ENSG00000180448.9	-0.00866613	0.17452
ENSG00000180900.15	-0.00206593	0.328144
ENSG00000180919.3	2.91742	0.0183808
ENSG00000180929.5	-0.13664	0.866836
ENSG00000181856.13	-0.0222474	0.542967
ENSG00000181885.17	-0.00325623	0.147037
ENSG00000182048.10	-0.611423	0.617244
ENSG00000182179.9	-0.00775057	0.0723579
ENSG00000182196.12	-0.187039	0.0847795
ENSG00000182199.9	-0.0020428	0.434555
ENSG00000182484.13	-0.00425114	0.208951
ENSG00000182518.12	-0.0101137	0.607397
ENSG00000182578.12	-0.00611861	0.193687
ENSG00000182759.3	0.200157	0.403767
ENSG00000182796.11	-0.00751516	0.689691
ENSG00000182866.15	-0.0232108	0.171186
ENSG00000183020.12	-0.00418753	0.608906
ENSG00000183060.14	-0.0196763	0.611929
ENSG00000183066.13	0.194945	0.307381
ENSG00000183246.6	-3.86996	0.333671
ENSG00000183324.9	2.70873	0.0739436
ENSG00000183426.14	-0.0900002	0.283102
ENSG00000183723.11	0.00584655	0.0142987
ENSG00000183773.14	-0.0183982	0.258819
ENSG00000183793.12	-0.0884244	0.498754
ENSG00000183798.4	0.0512341	0.144225
ENSG00000183889.11	-0.543157	0.465592
ENSG00000183963.17	-0.000475169	0.799816
ENSG00000184058.11	-0.00124281	0.757021
ENSG00000184209.14	-0.0102192	0.529683
ENSG00000184281.13	-0.0183857	0.123518
ENSG00000184343.9	0.0531366	0.518286
ENSG00000184363.8	0.000164931	0.891213
ENSG00000184481.15	0.0103689	0.00595013
ENSG00000184575.10	-0.000617084	0.870327
ENSG00000184697.6	-0.0104373	0.826357
ENSG00000184709.7	-0.492904	0.443227
ENSG00000184860.8	-0.0103499	0.518807
ENSG00000184908.16	0.011766	0.973912
ENSG00000184956.14	-0.00574661	0.73096
ENSG00000184979.9	-0.00158861	0.936348
ENSG00000184990.11	-0.00326123	0.485191
ENSG00000185038.13	0.000863012	0.661785
ENSG00000185133.12	0.00226076	0.89102
ENSG00000185187.11	-0.0116541	0.176493
ENSG00000185324.20	-0.00336203	0.552998
ENSG00000185340.14	-0.00219207	0.76581
ENSG00000185507.18	-0.00392098	0.365669
ENSG00000185519.8	0.033709	0.747723
ENSG00000185567.6	0.00101526	0.166293
ENSG00000185614.4	0.000755527	0.967341
ENSG00000185615.14	-0.00487005	0.917965
ENSG00000185633.9	-0.000769861	0.46126
ENSG00000185792.8	-0.534149	0.701202
ENSG00000185838.12	-0.0108906	0.670926
ENSG00000185864.15	0.0921719	0.253558
ENSG00000185896.10	0.000764958	0.457226
ENSG00000185915.5	-0.0819919	0.889863
ENSG00000186153.15	0.0308405	0.237586
ENSG00000186187.10	-0.000862003	0.910707
ENSG00000186193.8	-0.00156499	0.82359
ENSG00000186207.4	0.358835	0.780487
ENSG00000186234.7	-3.34262	0.550766
ENSG00000186364.10	0.0144345	0.890467
ENSG00000186471.11	0.97381	0.655054
ENSG00000186625.12	0.010948	0.663895
ENSG00000186897.4	0.0839207	0.74053
ENSG00000186951.15	0.0155321	0.0390942
ENSG00000187024.12	3.50194	0.132236
ENSG00000187091.12	0.00121631	0.563153
ENSG00000187325.4	0.0070019	0.619277
ENSG00000187479.5	-0.0148909	0.0810621
ENSG00000187583.9	-0.004117	0.725407
ENSG00000187595.13	0.102355	0.0901974
ENSG00000187634.9	-0.0013527	0.941353
ENSG00000187642.8	-0.0104137	0.574153
ENSG00000187682.1	0.0596923	0.979302
ENSG00000187838.15	-0.563027	0.0467692
ENSG00000187848.11	-0.279437	0.389321
ENSG00000187959.8	1.53329	0.139085
ENSG00000187980.6	-0.796684	0.129236
ENSG00000188002.9	-0.0113281	0.58802
ENSG00000188056.10	-1.25116	0.610431
ENSG00000188070.9	0.00264212	0.905569
ENSG00000188092.13	-0.0638186	0.470643
ENSG00000188163.7	0.488516	0.592076
ENSG00000188186.9	-0.00188832	0.652512
ENSG00000188229.5	1.5526e-05	0.9827
ENSG00000188269.7	0.724065	0.00117893
ENSG00000188396.3	-0.869264	0.614457
ENSG00000188452.12	-0.0948712	0.0685405
ENSG00000188486.3	0.000224214	0.942303
ENSG00000188505.4	-0.000685598	0.822692
ENSG00000188525.3	0.418243	0.11764
ENSG00000188613.6	0.15656	0.00854565
ENSG00000188779.9	-0.0622596	0.871695
ENSG00000188786.9	-0.00411323	0.809019
ENSG00000188976.9	-0.0051075	0.208375
ENSG00000189046.9	-0.0404004	0.0909756
ENSG00000189077.9	-0.00608716	0.568021
ENSG00000189269.11	-0.320971	0.488259
ENSG00000189350.11	0.00675858	0.968258
ENSG00000189409.11	0.275952	0.685079
ENSG00000196110.6	0.132421	0.283002
ENSG00000196123.11	-0.00300755	0.747457
ENSG00000196169.13	-0.613096	0.132362
ENSG00000196187.10	-0.00233149	0.551009
ENSG00000196296.12	0.0415207	0.546486
ENSG00000196305.16	0.00297683	0.326445
ENSG00000196396.8	-0.00405622	0.546531
ENSG00000196405.11	-0.00377645	0.442898
ENSG00000196436.8	0.0045005	0.775851
ENSG00000196455.6	0.0344335	0.01866
ENSG00000196497.14	-0.0865953	0.103517
ENSG00000196511.12	0.0302253	0.450543
ENSG00000196517.10	-0.0031566	0.827567
ENSG00000196557.9	-0.00644985	0.387745
ENSG00000196562.13	-7.91353e-05	0.9357
ENSG00000196588.13	-0.0227554	0.0288758
ENSG00000196666.4	-1.21066	0.587298
ENSG00000196696.11	0.0226634	0.360223
ENSG00000196700.6	-0.000376417	0.965578
ENSG00000196878.11	-2.84404e-05	0.953893
ENSG00000196950.12	0.0125444	0.00987767
ENSG00000196976.6	-0.000191026	0.97732
ENSG00000196979.1	0.239473	0.685243
ENSG00000197226.11	0.0052491	0.248883
ENSG00000197586.11	-0.00384836	0.422129
ENSG00000197614.9	0.002443	0.719534
ENSG00000197629.5	-0.0186212	0.0899234
ENSG00000197746.12	0.000115379	0.589247
ENSG00000197753.8	0.369247	0.659224
ENSG00000197785.12	0.00182068	0.821275
ENSG00000197885.9	-0.0263055	0.684891
ENSG00000197893.12	0.309919	0.340097
ENSG00000197956.8	-7.66417e-05	0.362517
ENSG00000197982.13	-0.0140465	0.207341
ENSG00000197989.12	-0.0379754	0.0317374
ENSG00000197993.6	0.00175712	0.910863
ENSG00000198026.7	-0.0142811	0.371219
ENSG00000198033.10	-0.0112474	0.670981
ENSG00000198089.13	-0.0154401	0.197407
ENSG00000198208.10	0.00678229	0.87245
ENSG00000198231.11	0.0050567	0.287437
ENSG00000198252.10	0.0192265	0.322512
ENSG00000198467.12	-0.00022051	0.718459
ENSG00000198517.8	-0.0161861	0.0989628
ENSG00000198643.5	0.00538447	0.00468641
ENSG00000198646.12	0.00218893	0.337551
ENSG00000198720.11	-0.00430787	0.704246
ENSG00000198832.9	-0.00101267	0.735154
ENSG00000198853.10	0.000140434	0.989617
ENSG00000198931.9	-0.00190961	0.490067
ENSG00000198937.8	-0.0263064	0.189925
ENSG00000198944.5	0.0463916	0.0851679
ENSG00000198951.10	-0.00656043	0.348633
ENSG00000199165.2	3.72108	0.0171577
ENSG00000200378.1	5.53498	0.355198
ENSG00000201264.1	3.94462	0.0837136
ENSG00000202343.1	1.81405	0.0954414
ENSG00000202533.1	-1.034	0.539699
ENSG00000203667.8	0.0168623	0.791485
ENSG00000203734.10	0.451965	0.0205036
ENSG00000203772.7	0.0179407	0.678811
ENSG00000203804.4	0.153387	0.253546
ENSG00000203811.1	0.541976	0.418956
ENSG00000204019.4	0.0359814	0.218496
ENSG00000204084.11	-0.027828	0.318508
ENSG00000204165.5	-0.459374	0.327634
ENSG00000204172.10	0.00935235	0.880126
ENSG00000204290.9	-0.204439	0.87717
ENSG00000204396.9	0.0951735	0.0740634
ENSG00000204420.7	0.331139	0.282318
ENSG00000204421.2	-0.0406192	0.389101
ENSG00000204455.7	0.972435	0.80043
ENSG00000204475.8	-0.131123	0.47814
ENSG00000204482.9	-0.0710173	0.0323466
ENSG00000204560.8	-0.0200891	0.0728072
ENSG00000204564.10	-0.0256422	0.134702
ENSG00000204618.7	-0.0243045	0.296524
ENSG00000204619.6	-0.0152922	0.0340504
ENSG00000204644.8	-0.655983	0.131892
ENSG00000204655.10	-2.38174	0.535704
ENSG00000204710.2	-0.0621066	0.384235
ENSG00000204791.7	0.13821	0.470264
ENSG00000205090.7	-0.0746288	0.785112
ENSG00000205643.9	-0.0595987	0.243585
ENSG00000205702.9	-0.41261	0.148937
ENSG00000205744.8	-0.0269615	0.189636
ENSG00000206384.9	0.100452	0.10506
ENSG00000206530.7	0.0125918	0.336818
ENSG00000206561.11	-0.0424585	0.561109
ENSG00000206567.8	-0.0825963	0.240649
ENSG00000206739.1	2.38725	0.108452
ENSG00000207563.1	0.306375	0.709391
ENSG00000207721.1	0.715483	0.0992959
ENSG00000207864.2	0.116554	0.851527
ENSG00000210195.2	0.172927	0.541901
ENSG00000210196.2	-0.00234914	0.566656
ENSG00000211445.10	0.000535824	0.0301904
ENSG00000211450.8	-0.00565656	0.315357
ENSG00000211584.12	-0.00340933	0.723951
ENSG00000213071.9	0.398465	0.178045
ENSG00000213113.3	0.249549	0.93538
ENSG00000213373.6	0.432974	0.00357867
ENSG00000213590.2	0.279556	0.218408
ENSG00000213694.3	-8.96455e-05	0.984806
ENSG00000213722.7	-0.00470436	0.34869
ENSG00000213937.3	-0.0103025	0.559151
ENSG00000214595.10	0.0054826	0.346023
ENSG00000214655.9	-0.00592737	0.455528
ENSG00000214706.9	-0.0106126	0.260204
ENSG00000214733.7	-0.0496203	0.742043
ENSG00000214765.7	-0.0299771	0.638129
ENSG00000214860.4	0.114083	0.352037
ENSG00000214867.3	1.09803	0.128402
ENSG00000214946.12	2.00266	0.545151
ENSG00000215187.8	-0.426222	0.221693
ENSG00000215458.7	0.00939729	0.0239875
ENSG00000215859.7	0.592954	0.0385422
ENSG00000215914.4	-0.172641	0.81774
ENSG00000217442.3	-0.244115	0.67844
ENSG00000218537.1	0.0864964	0.666619
ENSG00000219361.1	2.15463	0.0053547
ENSG00000219433.2	0.594488	0.017704
ENSG00000219700.1	0.717934	0.0197933
ENSG00000220848.4	-0.0849325	0.717233
ENSG00000221319.1	4.87818	0.0129631
ENSG00000221539.1	-0.466	0.182218
ENSG00000221821.3	-0.0736006	0.114541
ENSG00000221869.4	-0.00326393	0.247157
ENSG00000222448.1	-1.41929	0.664834
ENSG00000223403.3	0.210253	0.794438
ENSG00000223572.8	0.0120612	0.600753
ENSG00000223705.8	-0.000615436	0.964996
ENSG00000223764.2	0.020021	0.486652
ENSG00000223802.6	0.03102	0.664677
ENSG00000224016.2	-1.01754	0.617911
ENSG00000224066.1	-1.08785	0.413516
ENSG00000224312.1	-0.203803	0.967413
ENSG00000224712.9	-0.0851582	0.805942
ENSG00000224961.1	0.0806319	0.561468
ENSG00000224976.2	3.05713	0.104184
ENSG00000225031.1	-0.26124	0.163858
ENSG00000225419.1	-5.81561	0.113938
ENSG00000225526.4	0.00471433	0.785833
ENSG00000225531.1	0.0426275	0.988183
ENSG00000225532.1	0.0688157	0.949952
ENSG00000225840.2	0.0145448	0.293085
ENSG00000225872.2	-0.309725	0.882096
ENSG00000225889.6	-0.0422406	0.694305
ENSG00000225969.1	-0.0109615	0.762154
ENSG00000226054.2	0.152066	0.530478
ENSG00000226055.2	1.6878	0.0802596
ENSG00000226686.6	-0.00272133	0.982303
ENSG00000226943.3	0.563047	0.139339
ENSG00000226950.5	-0.00841282	0.124194
ENSG00000227039.5	-0.263538	0.0895658
ENSG00000227066.1	-0.0152387	0.181136
ENSG00000227070.1	-0.37291	0.612497
ENSG00000227159.6	-1.8482	0.768537
ENSG00000227218.6	-0.314954	0.265813
ENSG00000227473.1	0.0892416	0.712697
ENSG00000227620.4	-0.389443	0.741621
ENSG00000227632.2	0.10236	0.869284
ENSG00000227683.1	-0.47156	0.652067
ENSG00000227711.2	6.71062	0.168568
ENSG00000227741.1	-0.125528	0.765395
ENSG00000227742.1	0.974435	0.558555
ENSG00000227802.1	0.235717	0.579974
ENSG00000228071.4	-1.33093	0.241381
ENSG00000228133.2	3.19419	0.0954956
ENSG00000228278.3	-0.511178	0.459756
ENSG00000228474.4	-0.00758335	0.0287142
ENSG00000228727.7	-0.171065	0.508134
ENSG00000228962.1	-0.544209	0.546996
ENSG00000229122.1	-0.753531	0.335484
ENSG00000229259.1	-2.29747	0.327298
ENSG00000229407.4	-0.283934	0.704506
ENSG00000229720.1	0.1965	0.913981
ENSG00000229939.1	0.11604	0.85522
ENSG00000229980.4	0.228409	0.126766
ENSG00000230170.1	-2.17328	0.621188
ENSG00000230262.5	0.694539	0.361438
ENSG00000230756.1	1.75157	0.64932
ENSG00000230929.5	2.80565	0.0121822
ENSG00000231177.4	0.26842	0.0756093
ENSG00000231672.5	-0.070267	0.621448
ENSG00000231760.4	0.276277	0.146657
ENSG00000231852.5	-0.0525609	0.872987
ENSG00000232218.1	-0.61969	0.818079
ENSG00000232491.1	2.92643	0.259245
ENSG00000232608.1	0.754483	0.03817
ENSG00000232677.5	-0.00156422	0.842033
ENSG00000232742.3	0.83766	0.593256
ENSG00000232754.1	2.07785	0.0334681
ENSG00000233024.6	0.703681	0.837785
ENSG00000233101.9	-0.0263965	0.565809
ENSG00000233330.1	1.90496	0.0133089
ENSG00000233337.1	0.172152	0.477874
ENSG00000233381.3	-0.892344	0.466175
ENSG00000233427.1	1.66332	0.728144
ENSG00000233436.6	0.705859	0.00895967
ENSG00000233538.1	4.54568	0.133513
ENSG00000233614.6	-0.0858171	0.836786
ENSG00000233622.1	-0.062539	0.611278
ENSG00000233750.3	-1.24151	0.509189
ENSG00000233783.6	0.19712	0.0280071
ENSG00000233884.1	0.105268	0.456306
ENSG00000233885.6	0.105906	0.626391
ENSG00000234020.1	-0.600077	0.754848
ENSG00000234026.1	0.107318	0.512329
ENSG00000234139.2	2.09669	0.169331
ENSG00000234160.1	0.0987718	0.621362
ENSG00000234226.5	2.51226	0.0866343
ENSG00000234290.2	-0.206339	0.209084
ENSG00000234345.2	2.37888	0.0367894
ENSG00000234354.3	-1.56788	0.358298
ENSG00000234405.1	0.60346	0.492002
ENSG00000234409.6	-0.0835885	0.602835
ENSG00000234575.1	0.00916365	0.869593
ENSG00000234763.1	0.793428	0.00675956
ENSG00000234769.7	-0.23065	0.509553
ENSG00000234776.3	-0.631049	0.712472
ENSG00000234848.1	2.13845	0.13239
ENSG00000235079.1	1.49946	0.0186577
ENSG00000235173.5	-0.0163476	0.112258
ENSG00000235194.7	0.0123219	0.50329
ENSG00000235399.1	0.802749	0.776911
ENSG00000235615.2	-1.03801	0.658206
ENSG00000235663.1	4.36463	0.00856675
ENSG00000235821.1	-2.57677	0.0772992
ENSG00000235961.5	0.0697358	0.306985
ENSG00000235979.7	-0.826835	0.78779
ENSG00000236194.3	0.485585	0.034764
ENSG00000236397.3	0.0779031	0.458156
ENSG00000236675.1	0.109334	0.262534
ENSG00000236830.5	0.0458798	0.0640323
ENSG00000237063.1	1.73883	0.256306
ENSG00000237101.1	-0.205614	0.692151
ENSG00000237172.3	0.0369479	0.0263187
ENSG00000237190.3	0.010753	0.620072
ENSG00000237214.3	-0.536995	0.0617879
ENSG00000237264.4	-0.283295	0.486308
ENSG00000237452.2	3.78955	0.002318
ENSG00000237517.7	-0.125168	0.322188
ENSG00000237807.3	-0.0276824	0.326522
ENSG00000238151.1	1.42022	0.360931
ENSG00000238171.1	0.865031	0.602772
ENSG00000238178.5	0.00250948	0.988746
ENSG00000238271.2	0.0579301	0.53167
ENSG00000238279.1	-0.0159369	0.554801
ENSG00000239253.1	-10.8558	0.0766896
ENSG00000239264.7	-0.0127056	0.797165
ENSG00000239480.1	2.52489	0.0588995
ENSG00000239486.1	0.6961	0.0924419
ENSG00000239779.5	-0.0173623	0.39817
ENSG00000239969.4	0.33489	0.331201
ENSG00000240288.6	0.165442	0.0602043
ENSG00000240338.4	-0.509894	0.822696
ENSG00000240674.1	-1.06502	0.647559
ENSG00000240710.1	0.953962	0.0337837
ENSG00000240972.1	-0.00942346	0.0867972
ENSG00000241493.1	1.88783	0.0173807
ENSG00000241527.1	1.60862	0.123297
ENSG00000241878.8	-0.030177	0.0488887
ENSG00000242094.1	0.111791	0.0260898
ENSG00000242199.1	1.40119	0.0249821
ENSG00000242252.1	0.0367903	0.829059
ENSG00000242731.3	5.05469	0.00100303
ENSG00000242852.5	-0.0620707	0.854148
ENSG00000242876.3	1.20701	0.638326
ENSG00000242952.1	-4.73231	0.0883339
ENSG00000242953.1	-13.5776	0.184649
ENSG00000243207.5	0.339266	0.946449
ENSG00000243708.7	0.00413203	0.978131
ENSG00000243716.9	-0.0221302	0.674994
ENSG00000243960.1	-0.357338	0.564672
ENSG00000244038.8	-0.000288555	0.847958
ENSG00000244165.1	-0.0213314	0.557468
ENSG00000244355.6	0.170153	0.00146291
ENSG00000244383.1	0.278465	0.507436
ENSG00000244607.4	-0.183398	0.386315
ENSG00000244953.1	-0.718269	0.373009
ENSG00000245317.2	0.0650983	0.751656
ENSG00000245719.1	1.23169	0.18502
ENSG00000245910.7	-0.00168632	0.713802
ENSG00000246548.3	0.613415	0.015392
ENSG00000246596.5	0.482809	0.035383
ENSG00000247679.2	0.269299	0.105361
ENSG00000247728.2	3.84683	0.0644299
ENSG00000248114.1	1.12377	0.112115
ENSG00000248126.1	0.678123	0.457216
ENSG00000248309.4	-0.320713	0.510248
ENSG00000248375.1	-0.214979	0.640075
ENSG00000248559.1	1.47917	0.0475809
ENSG00000248705.1	1.00689	0.170881
ENSG00000248712.6	0.0714628	0.283325
ENSG00000249035.5	0.933683	0.00685692
ENSG00000249635.1	0.739094	0.411929
ENSG00000249751.3	-0.149453	0.203368
ENSG00000250107.1	2.88602	0.0165251
ENSG00000250363.1	-8.59989	0.199606
ENSG00000250641.1	0.199761	0.00223735
ENSG00000250794.2	0.708099	0.596526
ENSG00000250906.1	4.14141	0.00394687
ENSG00000250979.1	0.0695263	0.954129
ENSG00000251087.3	-0.595256	0.574274
ENSG00000251179.1	0.171361	0.459832
ENSG00000251271.3	0.658018	0.800485
ENSG00000251402.3	1.27138	0.580184
ENSG00000251603.1	0.811457	0.00391303
ENSG00000251604.1	2.2255	0.386778
ENSG00000251669.4	-0.0607343	0.649688
ENSG00000252202.1	-0.882862	0.674295
ENSG00000253304.1	0.047465	0.0779311
ENSG00000253317.1	-3.69808	0.277492
ENSG00000253369.1	-0.0808491	0.697161
ENSG00000253641.4	-0.0020218	0.992903
ENSG00000253649.2	-0.0171467	0.953375
ENSG00000253708.1	2.42421	0.534676
ENSG00000253755.1	-0.0133189	0.0404468
ENSG00000253859.2	0.802909	0.00281576
ENSG00000254204.1	-0.734938	0.415993
ENSG00000254338.1	0.802859	0.0766629
ENSG00000254429.1	0.640363	0.76722
ENSG00000254444.1	5.87812	0.0351161
ENSG00000254521.5	-0.053053	0.464812
ENSG00000254536.1	-0.742561	0.630686
ENSG00000254545.1	-0.252644	0.0764157
ENSG00000254558.1	0.328243	0.120089
ENSG00000254605.1	-0.747303	0.246572
ENSG00000254777.4	0.180175	0.813471
ENSG00000254802.1	-0.11179	0.699285
ENSG00000254814.1	0.183083	0.827946
ENSG00000254967.5	-1.1604	0.420088
ENSG00000254978.2	0.0612117	0.954559
ENSG00000255191.1	-0.79877	0.359415
ENSG00000255200.1	-0.0474436	0.773484
ENSG00000255282.5	-0.0950908	0.613882
ENSG00000255305.1	4.67828	0.00517788
ENSG00000255366.1	0.432718	0.093481
ENSG00000255478.1	1.96296	0.680977
ENSG00000255730.3	-1.72627	0.715327
ENSG00000255769.6	-0.0421374	0.294406
ENSG00000255823.2	0.102751	0.332455
ENSG00000255864.4	1.65528	0.00401454
ENSG00000255867.1	-0.17779	0.763645
ENSG00000255967.1	-0.0307033	0.991076
ENSG00000256028.2	-0.25791	0.555537
ENSG00000256210.3	-0.352863	0.724458
ENSG00000256269.5	-5.96488e-05	0.995446
ENSG00000256603.1	4.40798	0.0276362
ENSG00000257283.1	5.35093	0.0131449
ENSG00000257337.5	0.0186438	0.652413
ENSG00000257390.4	-1.46228	0.226282
ENSG00000257407.1	-0.0116728	0.991405
ENSG00000257475.2	1.06531	0.0219465
ENSG00000257569.1	6.46984	0.0073283
ENSG00000257727.4	-0.00906645	0.46762
ENSG00000257740.1	0.753592	0.337912
ENSG00000257989.1	-1.33589	0.651574
ENSG00000258108.1	0.601287	0.606118
ENSG00000258130.6	-0.401201	0.545564
ENSG00000258301.3	-0.0935134	0.769075
ENSG00000258315.4	-0.330738	0.164988
ENSG00000258405.8	0.185926	0.0656604
ENSG00000258427.3	-3.86485	0.0110702
ENSG00000258539.1	0.35596	0.589746
ENSG00000258558.1	0.565785	0.83557
ENSG00000258626.2	0.972431	0.260411
ENSG00000258727.1	-0.0872181	0.3853
ENSG00000258819.1	0.607073	0.00123041
ENSG00000258890.5	0.0070385	0.575157
ENSG00000258952.2	0.413762	0.492312
ENSG00000259040.4	-0.247723	0.540111
ENSG00000259288.4	-5.21994	0.303302
ENSG00000259289.2	1.53813	0.0810469
ENSG00000259399.1	-6.72574	0.0716302
ENSG00000259519.1	7.84918	0.0385555
ENSG00000259522.2	1.67962	0.574296
ENSG00000259605.3	-0.304755	0.0692025
ENSG00000259647.1	-6.45307	0.0898921
ENSG00000259648.1	1.30744	0.0582778
ENSG00000259762.1	-0.964926	0.63074
ENSG00000259780.3	-0.254855	0.874381
ENSG00000259803.5	-0.0741222	0.662573
ENSG00000259807.1	0.241121	0.0794773
ENSG00000259895.1	1.44212	0.0494816
ENSG00000259928.1	1.10097	0.766317
ENSG00000259933.5	0.0639157	0.607336
ENSG00000260001.5	-0.316964	0.302383
ENSG00000260027.4	0.00415711	0.563624
ENSG00000260105.5	0.188302	0.00738529
ENSG00000260190.1	0.104179	0.314763
ENSG00000260238.4	0.0821689	0.684549
ENSG00000260500.1	0.25116	0.871334
ENSG00000260517.2	0.146219	0.378685
ENSG00000260645.1	0.145145	0.03207
ENSG00000260660.1	3.57447	0.332047
ENSG00000261052.4	0.753775	0.556066
ENSG00000261123.1	0.0641907	0.602808
ENSG00000261276.1	-3.14773	0.421535
ENSG00000261295.1	0.129999	0.102199
ENSG00000261456.4	0.37484	0.133416
ENSG00000261548.1	1.16312	0.670071
ENSG00000261632.1	1.25288	0.00246847
ENSG00000261659.2	-0.203515	0.485848
ENSG00000261668.1	0.677782	0.00989531
ENSG00000261707.1	0.535537	0.721129
ENSG00000261884.2	-0.00247388	0.96495
ENSG00000261915.5	2.5393	0.597248
ENSG00000261924.1	0.715943	0.0502449
ENSG00000262006.1	2.3037	0.141575
ENSG00000262052.1	-2.75135	0.604231
ENSG00000262074.5	-0.578271	0.608895
ENSG00000262877.4	0.0321519	0.202901
ENSG00000262943.6	-0.0276015	0.471604
ENSG00000263011.1	-0.140872	0.902425
ENSG00000263050.1	-1.06201	0.0239158
ENSG00000263214.1	-0.291332	0.694251
ENSG00000263316.1	-0.513797	0.418114
ENSG00000263370.1	4.08957	0.149945
ENSG00000263429.3	0.00167507	0.903659
ENSG00000263765.4	8.04922	0.0210344
ENSG00000263934.3	-0.0140183	0.994083
ENSG00000263946.1	0.0532826	0.77722
ENSG00000263970.1	0.801742	0.65371
ENSG00000264635.1	0.506994	0.00882488
ENSG00000264785.1	-4.02449	0.429967
ENSG00000265185.4	1.69256	0.00137765
ENSG00000265912.1	0.218748	0.0408607
ENSG00000266171.1	0.395052	0.0166713
ENSG00000266289.1	-0.759048	0.557423
ENSG00000266402.3	0.0246657	0.860239
ENSG00000266733.4	1.40622	0.293141
ENSG00000266957.1	4.11636	0.0852724
ENSG00000267053.5	-0.0197244	0.936736
ENSG00000267074.1	-1.36438	0.0873728
ENSG00000267105.1	-1.89865	0.675409
ENSG00000267369.1	-0.355952	0.121659
ENSG00000267383.5	0.0508989	0.407321
ENSG00000267405.1	-0.019979	0.874695
ENSG00000267466.1	-0.116432	0.810286
ENSG00000267480.1	-0.122781	0.583215
ENSG00000267484.1	0.570558	0.720778
ENSG00000267505.1	-0.0322671	0.753596
ENSG00000267506.4	0.270787	0.504859
ENSG00000267510.1	-0.247003	0.524467
ENSG00000267568.5	-0.852174	0.553577
ENSG00000267605.4	0.152562	0.431495
ENSG00000267672.1	1.84006	0.038295
ENSG00000267694.1	2.95117	0.0868068
ENSG00000267724.1	0.452515	0.00959455
ENSG00000267748.4	0.131793	0.354337
ENSG00000267758.1	0.605318	0.0327984
ENSG00000267879.1	0.488828	0.627518
ENSG00000267952.1	4.02161	0.244091
ENSG00000268015.1	1.99106	0.0331897
ENSG00000268104.2	0.00214527	0.478887
ENSG00000268199.2	-3.77457	0.498876
ENSG00000268288.1	-1.17695	0.603613
ENSG00000268575.1	0.153876	0.090777
ENSG00000268717.1	0.657613	0.0195637
ENSG00000268883.2	0.626005	0.683109
ENSG00000268903.1	-0.126443	0.0837607
ENSG00000268938.2	-0.0488909	0.936877
ENSG00000268970.1	-0.116054	0.560639
ENSG00000269072.1	-0.334434	0.804579
ENSG00000269349.1	3.43752	0.00421892
ENSG00000269514.1	-0.28118	0.57611
ENSG00000269656.1	-2.3238	0.287386
ENSG00000269858.4	-0.0091945	0.570266
ENSG00000269893.5	-0.00691717	0.351438
ENSG00000269930.1	0.0392348	0.972118
ENSG00000269982.1	-0.123487	0.522653
ENSG00000270074.1	1.45984	0.205916
ENSG00000270402.1	0.852419	0.018028
ENSG00000270433.1	0.660957	0.0113911
ENSG00000270510.1	1.4753	0.0085998
ENSG00000270706.1	4.27143	0.0113535
ENSG00000270765.4	0.0749119	0.0592995
ENSG00000270882.2	-0.246477	0.522244
ENSG00000270885.1	0.0225997	0.447883
ENSG00000270947.1	0.676195	0.0309788
ENSG00000271138.1	1.77976	0.591007
ENSG00000271192.1	-1.66822	0.413243
ENSG00000271553.1	0.135542	0.326175
ENSG00000271787.1	3.75958	0.391218
ENSG00000271848.1	1.06148	0.820474
ENSG00000271913.4	-0.523255	0.502959
ENSG00000272006.1	0.859322	0.282008
ENSG00000272034.1	-0.434592	0.284615
ENSG00000272087.1	-0.0306206	0.632029
ENSG00000272112.1	-0.011971	0.970574
ENSG00000272121.1	-0.330232	0.360498
ENSG00000272148.1	-0.670741	0.555716
ENSG00000272203.1	0.844805	0.164133
ENSG00000272223.1	-0.318792	0.558419
ENSG00000272333.4	0.00450477	0.408125
ENSG00000272379.1	-1.06327	0.736788
ENSG00000272391.4	0.00538225	0.662273
ENSG00000272438.1	-0.0255255	0.952629
ENSG00000272645.2	-0.0157357	0.639678
ENSG00000272689.1	1.37756	0.0545412
ENSG00000272791.1	0.279973	0.268403
ENSG00000272798.1	-0.415689	0.913934
ENSG00000272821.1	-0.0392176	0.193703
ENSG00000272829.1	-0.410695	0.236306
ENSG00000273027.1	-0.178207	0.841043
ENSG00000273073.1	0.308089	0.873747
ENSG00000273226.1	-0.101124	0.504212
ENSG00000273265.1	-0.193182	0.819372
ENSG00000273311.1	-0.175768	0.160273
ENSG00000273350.1	0.936987	0.00399144
ENSG00000273639.3	1.00878	0.772673
ENSG00000273816.1	-1.19835	0.733552
ENSG00000274049.3	-1.9463	0.489699
ENSG00000274295.1	-0.110062	0.674491
ENSG00000274363.1	0.407141	0.663235
ENSG00000274736.3	-0.492815	0.162566
ENSG00000275301.1	-0.276935	0.579923
ENSG00000275793.1	0.78681	0.0840462
ENSG00000276298.1	2.14098	0.227733
ENSG00000276325.1	3.00791	0.211092
ENSG00000276742.1	-1.06206	0.483128
ENSG00000276772.1	-1.8549	0.470184
ENSG00000277358.1	-1.49613	0.594321
ENSG00000277877.3	0.331961	0.341115
ENSG00000277895.1	1.27579	0.162375
ENSG00000278075.1	2.4078	0.103309
ENSG00000278464.1	-0.514037	0.539596
ENSG00000278603.1	-0.388039	0.519869
ENSG00000278932.2	0.328659	0.604874
ENSG00000278978.1	0.0657733	0.0954919
ENSG00000279067.1	1.37926	0.0672117
ENSG00000279117.1	0.0199042	0.180693
ENSG00000279208.1	1.4179	0.0524411
ENSG00000279322.1	4.27565	0.40069
ENSG00000279332.1	-0.0171222	0.90315
ENSG00000279375.1	1.88167	0.0134273
ENSG00000279464.1	-0.347363	0.238975
ENSG00000279484.1	-0.708871	0.728513
ENSG00000279792.1	0.706917	0.107696
ENSG00000279802.1	0.139882	0.0292248
ENSG00000280169.1	1.24952	0.449037
ENSG00000280212.1	-0.033665	0.964224
ENSG00000280213.1	0.148678	0.275267
ENSG00000280311.1	1.98549	0.0969671
ENSG00000280328.1	0.0061106	0.976889
ENSG00000280560.1	-1.49813	0.558023
ENSG00000281097.1	0.426947	0.0998815
ENSG00000281386.1	0.99522	0.0382515
ENSG00000281538.1	0.0761292	0.889268
ENSG00000281691.1	1.60926	0.06457

## Sheet: CG.DFI.BRCA
Gene	Coefficient	Logrank p-value
ENSG00000002330.12	0.00486681	0.274948
ENSG00000004487.14	0.00323137	0.117874
ENSG00000004534.13	-0.00961731	0.0600432
ENSG00000004777.17	-0.00486208	0.671633
ENSG00000004864.12	0.00904885	0.121967
ENSG00000004975.10	0.000585301	0.950886
ENSG00000005007.11	-0.00138865	0.580336
ENSG00000005059.14	-0.00608924	0.560662
ENSG00000006007.10	-0.00661098	0.0205713
ENSG00000006047.11	0.0163406	0.00858639
ENSG00000006282.18	-0.00160134	0.427843
ENSG00000006283.16	0.046956	0.0429259
ENSG00000008056.11	0.00195583	0.843546
ENSG00000008083.12	-0.00466378	0.353886
ENSG00000008118.8	0.142767	3.23043e-05
ENSG00000008256.14	0.0124638	0.00055225
ENSG00000008323.14	0.000754001	0.915865
ENSG00000008438.4	-1.6901	0.421127
ENSG00000008441.15	0.00116058	0.0135858
ENSG00000009724.15	-0.3405	0.0578342
ENSG00000010327.9	0.00258411	0.0105117
ENSG00000011009.9	0.00743623	0.00405499
ENSG00000011143.15	-0.0212124	0.140043
ENSG00000011304.15	0.00393757	0.00887507
ENSG00000012211.11	0.0122955	0.615372
ENSG00000013306.14	0.00243572	0.0245887
ENSG00000015532.8	-0.00349347	0.364481
ENSG00000016402.11	-0.0182045	0.00495962
ENSG00000016864.15	-0.0052645	0.419058
ENSG00000019102.10	-0.00724716	0.515035
ENSG00000019144.15	0.00204047	0.509565
ENSG00000025708.11	-0.000905274	0.495063
ENSG00000029639.9	0.0321224	0.19305
ENSG00000030582.15	0.000665685	0.154517
ENSG00000033100.13	0.00424086	0.0966325
ENSG00000035681.6	0.014654	0.00189909
ENSG00000035720.6	-0.12352	0.167438
ENSG00000037042.8	0.000976729	0.933905
ENSG00000042062.10	-0.00548476	0.520504
ENSG00000047579.18	-0.014098	0.327705
ENSG00000047849.20	0.000812764	0.497962
ENSG00000048462.9	-0.0161191	0.649283
ENSG00000050426.14	-0.00567257	0.433183
ENSG00000050820.15	0.00865647	0.00484461
ENSG00000052344.14	-0.00130668	0.121569
ENSG00000054983.15	0.00021949	0.961933
ENSG00000055211.11	-0.0063516	0.261677
ENSG00000059691.10	0.00840716	0.487528
ENSG00000059915.15	0.0245157	0.0122929
ENSG00000061273.16	-0.00266334	0.466428
ENSG00000062096.13	-0.269089	0.27725
ENSG00000062282.13	0.00117657	0.290204
ENSG00000062524.14	-0.147361	0.331393
ENSG00000064012.20	0.00378122	0.700524
ENSG00000064309.13	-0.00276462	0.547121
ENSG00000064601.15	0.00196202	0.115511
ENSG00000064932.14	0.002052	0.387961
ENSG00000065320.7	0.00314919	0.499603
ENSG00000065923.8	0.00147913	0.663011
ENSG00000067182.6	0.000599334	0.801024
ENSG00000067704.9	-0.000311632	0.796404
ENSG00000067829.17	0.00890905	0.0187097
ENSG00000068137.13	0.00153564	0.711615
ENSG00000068305.16	-0.00231264	0.472178
ENSG00000068383.17	0.00276234	0.787622
ENSG00000068615.15	-0.00595111	0.257726
ENSG00000069424.13	0.00199571	0.770955
ENSG00000070047.10	-0.00150766	0.773605
ENSG00000070985.12	0.0860619	0.109469
ENSG00000071282.10	-0.00165737	0.547806
ENSG00000072163.17	-0.0013541	0.859898
ENSG00000072518.19	0.00106033	0.562576
ENSG00000072736.17	-0.00330309	0.7064
ENSG00000072778.18	-0.000515415	0.654093
ENSG00000074276.9	0.228163	0.0168942
ENSG00000075975.14	0.0030273	0.755278
ENSG00000076067.10	-0.00391707	0.595475
ENSG00000076108.10	-0.00212834	0.31344
ENSG00000076344.14	-0.00657757	0.471381
ENSG00000076706.13	0.0031494	0.0142453
ENSG00000077092.17	-0.000576457	0.962775
ENSG00000077097.12	-0.00182163	0.176154
ENSG00000077150.16	-0.00113195	0.730856
ENSG00000078061.11	-0.00490931	0.336785
ENSG00000078814.14	-0.0609806	0.533452
ENSG00000081181.6	0.0344792	0.23373
ENSG00000082014.15	-0.0014261	0.789526
ENSG00000083812.10	-0.00577463	0.80251
ENSG00000084693.14	0.00443552	0.478915
ENSG00000084754.9	0.00216708	0.150522
ENSG00000086159.11	-0.0106415	0.861773
ENSG00000087087.17	-0.00184249	0.555959
ENSG00000087191.11	-0.00016763	0.866373
ENSG00000088038.16	0.00430925	0.325641
ENSG00000089050.13	0.00283649	0.526565
ENSG00000089163.4	0.182778	0.255223
ENSG00000089486.15	0.0030167	0.687599
ENSG00000089820.14	0.00133358	0.714407
ENSG00000090097.19	0.00464011	0.348078
ENSG00000090975.11	0.017232	0.00815169
ENSG00000091622.14	0.0318676	0.000226446
ENSG00000092010.13	-0.00347849	0.00690978
ENSG00000092051.15	-0.331775	0.128138
ENSG00000092108.19	-0.000506064	0.889461
ENSG00000092758.14	-0.000236678	0.885969
ENSG00000092820.16	-0.000587811	0.305212
ENSG00000093144.17	0.00384139	0.320151
ENSG00000096063.13	0.00228971	0.207218
ENSG00000096384.18	0.000107155	0.163265
ENSG00000099365.8	-0.103207	0.108059
ENSG00000099377.12	-0.00207508	0.747001
ENSG00000099795.5	0.00147803	0.458083
ENSG00000099797.10	0.00016206	0.909106
ENSG00000099800.6	0.0043442	0.00978927
ENSG00000099817.10	0.00360049	0.0423734
ENSG00000099821.12	0.00967134	0.0777249
ENSG00000099822.2	0.0302209	0.0701236
ENSG00000099899.13	0.00768718	0.194376
ENSG00000099904.14	0.0136917	0.0457286
ENSG00000099956.16	0.00424304	0.0774399
ENSG00000099957.15	0.0889706	0.0849993
ENSG00000099958.13	-0.00149885	0.762955
ENSG00000099960.11	-0.0438691	0.0547715
ENSG00000100078.3	-0.0786458	0.111891
ENSG00000100079.6	-0.0753578	0.119182
ENSG00000100139.12	0.00346049	0.137215
ENSG00000100196.9	0.00213926	0.369317
ENSG00000100201.17	-0.000885431	0.187168
ENSG00000100220.10	0.00169755	0.625158
ENSG00000100239.14	0.00382003	0.174278
ENSG00000100241.19	0.00595825	0.00391308
ENSG00000100276.9	0.0400034	0.643159
ENSG00000100359.19	0.0012966	0.712319
ENSG00000100417.10	0.0121158	0.158275
ENSG00000100433.14	-0.403645	0.355849
ENSG00000100522.7	0.00602882	0.0135089
ENSG00000100767.14	-0.0113985	0.254314
ENSG00000100908.12	-0.00962774	0.449886
ENSG00000100918.11	-0.0055232	0.47608
ENSG00000100979.13	0.00215023	5.12561e-07
ENSG00000100982.10	-0.000264722	0.969366
ENSG00000100991.10	-0.00270406	0.343099
ENSG00000101003.9	0.0103136	0.097798
ENSG00000101004.13	0.00457492	0.6822
ENSG00000101082.12	-0.0559005	0.1111
ENSG00000101084.15	0.000722097	0.936128
ENSG00000101158.11	-8.4257e-05	0.956998
ENSG00000101160.12	-0.000608104	0.411762
ENSG00000101190.11	-0.00174087	0.874001
ENSG00000101220.16	0.0105608	0.00108429
ENSG00000101298.12	-0.000188219	0.934501
ENSG00000101343.13	-0.00244706	0.485157
ENSG00000101384.10	0.000722607	0.673276
ENSG00000101460.11	0.00176166	0.786098
ENSG00000101464.9	-0.000315398	0.958501
ENSG00000101882.8	0.00260627	0.843921
ENSG00000102007.9	0.000305637	0.760264
ENSG00000102109.8	0.00574531	0.324913
ENSG00000102144.12	0.000811344	0.0196634
ENSG00000102302.7	0.00459123	0.365386
ENSG00000102362.14	-0.0164791	0.00242852
ENSG00000102710.18	0.00145176	0.756955
ENSG00000102854.13	0.00101339	0.145033
ENSG00000102978.11	0.00274366	0.399405
ENSG00000102984.13	-0.0927801	0.154607
ENSG00000103024.6	1.53335e-05	0.993435
ENSG00000103044.9	0.00329347	0.0661187
ENSG00000103067.10	-3.02486e-05	0.991157
ENSG00000103111.13	0.000129611	0.976392
ENSG00000103126.13	0.0029699	0.535384
ENSG00000103264.14	0.00263579	0.778681
ENSG00000103351.11	-0.0107823	0.220489
ENSG00000103415.10	0.00197987	0.611644
ENSG00000103479.13	0.000203778	0.941443
ENSG00000103510.18	-0.00848386	0.16538
ENSG00000104341.15	0.00012308	0.510167
ENSG00000104524.12	0.00534463	0.077296
ENSG00000104660.16	-0.00410404	0.429053
ENSG00000104679.9	0.00443366	0.560003
ENSG00000104859.13	-0.00455203	0.529682
ENSG00000104903.4	0.0245837	0.358888
ENSG00000104936.16	0.00370964	0.489508
ENSG00000104964.13	-0.000124694	0.860866
ENSG00000105135.14	0.00382507	0.0305967
ENSG00000105137.11	0.010035	0.111859
ENSG00000105258.7	0.00860379	0.137939
ENSG00000105261.6	0.499169	0.475783
ENSG00000105325.12	0.00430553	0.402706
ENSG00000105355.7	0.00631281	0.0125358
ENSG00000105364.12	0.00653856	0.0282904
ENSG00000105373.17	-0.000616458	0.380946
ENSG00000105556.9	0.027182	0.0231858
ENSG00000105617.3	0.0106591	0.530878
ENSG00000105655.17	-0.000469969	0.805605
ENSG00000105656.11	-0.00946243	0.545038
ENSG00000105662.14	0.00199938	0.862233
ENSG00000105664.9	0.000424093	0.414434
ENSG00000105701.14	0.000959374	0.217053
ENSG00000105708.8	-0.0461274	0.0678782
ENSG00000105856.12	-0.00175283	0.657508
ENSG00000105877.16	-0.00452332	0.781967
ENSG00000105996.6	-0.329247	0.107056
ENSG00000106077.17	-0.00413628	0.182151
ENSG00000106123.10	0.00100927	0.771026
ENSG00000106346.10	0.00371142	0.790601
ENSG00000106367.12	0.00668208	0.0534512
ENSG00000106484.13	0.00074481	0.537185
ENSG00000106624.7	0.000298509	0.0351984
ENSG00000106628.9	0.00394191	0.00401909
ENSG00000106948.15	-0.00627195	0.196631
ENSG00000106991.12	0.00194534	0.153859
ENSG00000107159.11	0.00780944	0.00345371
ENSG00000107201.8	-0.00115297	0.568679
ENSG00000107404.16	0.00392091	0.0679764
ENSG00000107581.11	-0.00126698	0.234953
ENSG00000107672.13	-0.00196184	0.694756
ENSG00000107736.18	0.014585	0.269555
ENSG00000107829.12	-0.00906141	0.0301053
ENSG00000107859.8	1.38059	0.168123
ENSG00000107872.11	0.0103716	0.235026
ENSG00000107874.9	0.000872082	0.871838
ENSG00000107902.12	0.00923621	0.217663
ENSG00000108262.14	0.000364166	0.838226
ENSG00000108309.11	0.00810215	0.0080582
ENSG00000108556.7	0.0607454	0.522271
ENSG00000108591.8	-0.00710213	0.56184
ENSG00000108592.15	-0.000556732	0.785482
ENSG00000108602.16	-0.0268829	0.290782
ENSG00000108604.14	-0.0005286	0.603475
ENSG00000108788.10	0.00399194	0.506276
ENSG00000108797.10	0.0208633	0.252494
ENSG00000108799.11	-0.0120747	0.130559
ENSG00000108840.14	0.00695284	0.0242504
ENSG00000108846.14	0.000949896	0.427755
ENSG00000108854.14	0.00145078	0.76245
ENSG00000108924.12	-0.0272204	0.0340446
ENSG00000108963.16	-0.0159402	0.303493
ENSG00000109519.11	0.00794598	0.154682
ENSG00000109686.15	-0.000213716	0.954313
ENSG00000109956.11	-0.00382429	0.770821
ENSG00000110042.6	-9.32185e-06	0.997995
ENSG00000110395.4	0.00145615	0.812006
ENSG00000110697.11	0.00339385	0.517712
ENSG00000110700.5	-0.000577455	0.376185
ENSG00000110711.8	0.00167755	0.64798
ENSG00000110925.5	-0.00790424	0.121966
ENSG00000111077.16	-0.000384229	0.879219
ENSG00000111087.8	-0.125528	0.117759
ENSG00000111276.9	-0.00175575	0.403002
ENSG00000111344.10	0.0158112	0.104402
ENSG00000111445.12	0.0117396	0.2515
ENSG00000111669.13	0.000337592	0.355562
ENSG00000111671.8	0.00650137	0.666686
ENSG00000112137.15	-0.0133786	0.369394
ENSG00000112511.16	-0.00805328	0.152468
ENSG00000112514.14	0.00115367	0.373529
ENSG00000113716.11	-0.00348269	0.516099
ENSG00000113758.12	0.004337	0.00211492
ENSG00000113763.9	0.00885248	0.105687
ENSG00000114354.11	0.00194981	0.269082
ENSG00000115053.14	0.000289098	0.518832
ENSG00000115155.15	-0.0745347	0.4908
ENSG00000115232.12	0.00331353	0.46958
ENSG00000115275.10	0.00667676	0.0427288
ENSG00000115297.10	-0.16105	0.693545
ENSG00000115310.16	0.000379301	0.603049
ENSG00000115325.12	-0.00465375	0.580027
ENSG00000115657.11	0.0116591	0.612099
ENSG00000115841.18	-0.0906988	0.246368
ENSG00000116005.10	0.000583466	0.701053
ENSG00000116161.16	0.00253001	0.19547
ENSG00000116176.6	-3.84963e-05	0.997325
ENSG00000116221.14	0.00497799	0.000761869
ENSG00000116254.16	0.0191303	0.0510784
ENSG00000116329.9	0.011326	0.330625
ENSG00000116478.10	-0.000823456	0.722782
ENSG00000116957.11	0.00767368	0.169228
ENSG00000117308.13	0.000722918	0.844099
ENSG00000117411.15	0.00588505	0.00814937
ENSG00000117419.13	0.00697676	0.0282135
ENSG00000118094.10	-0.185437	0.698538
ENSG00000118518.14	-0.00111989	0.903133
ENSG00000118873.14	-0.000486783	0.888482
ENSG00000118997.12	-0.0529777	0.15314
ENSG00000119041.9	0.00375006	0.554361
ENSG00000119396.9	0.00173569	0.413511
ENSG00000119397.15	-0.0102209	0.289733
ENSG00000119408.15	-9.70302e-05	0.980172
ENSG00000119522.14	0.00929701	0.344176
ENSG00000119689.13	0.0027546	0.461176
ENSG00000119698.10	-0.0207431	0.207235
ENSG00000119915.4	-0.00584834	0.926824
ENSG00000119986.6	-0.00490763	0.685093
ENSG00000120333.4	-0.00631779	0.466859
ENSG00000120699.11	-0.00035879	0.976335
ENSG00000120784.14	0.0195336	0.0750401
ENSG00000120860.9	-0.011249	0.455954
ENSG00000120948.14	-0.00383387	0.395685
ENSG00000121053.5	0.128793	0.694811
ENSG00000121075.8	0.0293924	0.629188
ENSG00000121653.10	0.0041019	0.470207
ENSG00000122033.13	-0.000899335	0.894827
ENSG00000122034.11	0.00016966	0.910472
ENSG00000122203.13	-0.00250233	0.429902
ENSG00000122674.10	0.0102678	0.676085
ENSG00000122696.11	0.0164669	0.327321
ENSG00000122729.17	-0.000885576	0.843895
ENSG00000122735.14	-0.0696607	0.167223
ENSG00000122971.7	-0.0031715	0.664356
ENSG00000123136.13	0.00301357	0.107303
ENSG00000123143.11	0.00225036	0.0153871
ENSG00000123146.18	0.00548127	0.0783052
ENSG00000123329.16	-0.0164216	0.227808
ENSG00000123342.14	0.00312841	0.692719
ENSG00000123395.13	0.0030442	0.708258
ENSG00000123485.10	0.0104231	0.119722
ENSG00000123737.11	-0.000554054	0.960224
ENSG00000123870.10	-0.0938116	0.195025
ENSG00000124151.17	-0.00142639	0.516967
ENSG00000124541.6	0.00414168	0.281697
ENSG00000124574.13	0.014865	0.0394346
ENSG00000124587.12	0.00279425	0.219612
ENSG00000124593.13	-0.0135111	0.51241
ENSG00000124713.5	-0.0717854	0.0742074
ENSG00000124939.5	-0.000263914	0.748708
ENSG00000125037.11	-0.00259112	0.42526
ENSG00000125148.6	0.00062121	0.285904
ENSG00000125149.10	-0.003787	0.673496
ENSG00000125170.9	0.0157643	0.0432588
ENSG00000125257.12	0.00047349	0.816404
ENSG00000125355.14	-0.0985592	0.0730812
ENSG00000125520.12	5.44207e-05	0.974014
ENSG00000125650.4	0.0271128	0.661229
ENSG00000125652.6	0.0031784	0.339015
ENSG00000125741.4	0.0128439	0.251426
ENSG00000125753.12	0.00399688	0.0272605
ENSG00000125775.13	0.0312308	0.00755601
ENSG00000126010.5	-0.00210421	0.653456
ENSG00000126246.8	-0.12477	0.159016
ENSG00000126247.9	0.00123429	0.053792
ENSG00000126464.12	-0.000317876	0.940586
ENSG00000126500.3	0.0294751	0.782121
ENSG00000126603.7	-0.00191377	0.671132
ENSG00000126778.8	-0.00116852	0.690209
ENSG00000126895.12	-0.0471682	0.564468
ENSG00000127311.8	-0.0297153	0.130273
ENSG00000127533.3	0.0263411	0.163291
ENSG00000127564.15	0.00967896	0.0497504
ENSG00000127585.10	-0.00192384	0.567759
ENSG00000127948.12	0.0021245	0.208791
ENSG00000128016.5	-0.000617395	0.343092
ENSG00000128191.12	0.00709739	0.548626
ENSG00000128283.6	0.00209639	0.0167164
ENSG00000128322.6	-0.385016	0.481801
ENSG00000128346.9	0.0445821	0.469148
ENSG00000128463.11	0.0013118	0.746792
ENSG00000128482.14	0.103947	0.382458
ENSG00000128563.12	-0.00384077	0.6946
ENSG00000128564.6	0.0148019	0.118657
ENSG00000128595.15	0.000805906	0.0846328
ENSG00000128617.2	-0.00060812	0.993627
ENSG00000128709.11	0.0164246	0.381551
ENSG00000129103.16	-0.000315602	0.686937
ENSG00000129195.14	0.0220055	0.0323127
ENSG00000129347.18	0.00593211	0.271035
ENSG00000129451.10	0.00132825	0.224124
ENSG00000129691.14	-0.000538857	0.618559
ENSG00000129744.2	-0.180958	0.727634
ENSG00000129910.6	-0.0044412	0.876197
ENSG00000129951.17	-0.00138627	0.850876
ENSG00000129968.14	0.00841089	0.275412
ENSG00000130244.11	0.0117989	0.0848597
ENSG00000130487.5	-0.00958455	0.0721395
ENSG00000130511.14	0.00430472	0.355889
ENSG00000130545.14	0.0056359	0.651804
ENSG00000130584.9	-0.00370038	0.793277
ENSG00000130702.12	0.00130637	0.0669479
ENSG00000130706.11	0.00260081	0.054921
ENSG00000130714.14	0.00794601	0.354273
ENSG00000130717.11	0.0118444	0.152728
ENSG00000130734.8	0.00893859	0.403186
ENSG00000130748.6	-0.000745481	0.971476
ENSG00000130751.8	0.0237078	0.58321
ENSG00000130758.6	0.00971558	0.465071
ENSG00000130811.9	0.00156368	0.292852
ENSG00000130812.9	0.388522	0.137788
ENSG00000130813.16	-0.00740866	0.40244
ENSG00000130826.14	0.00085971	0.636321
ENSG00000130827.6	0.00187326	0.475382
ENSG00000130830.13	-0.00103783	0.912566
ENSG00000130876.10	0.0393297	0.202476
ENSG00000130881.12	0.00709656	0.00100574
ENSG00000131149.16	-0.000433359	0.734791
ENSG00000131153.7	0.00255869	0.65139
ENSG00000131188.10	0.0454737	0.000201614
ENSG00000131236.15	0.00061071	0.369222
ENSG00000131238.15	-0.000871368	0.235092
ENSG00000131389.15	0.00184326	0.474433
ENSG00000131470.13	-0.00110497	0.976119
ENSG00000131584.17	0.00533784	0.193473
ENSG00000131650.12	-0.00394919	0.835706
ENSG00000131788.14	-0.00159293	0.653514
ENSG00000131899.9	0.000671118	0.913114
ENSG00000132153.13	0.00204579	0.509934
ENSG00000132155.10	0.00258217	0.354468
ENSG00000132313.13	0.00550144	0.495179
ENSG00000132388.11	-7.50235e-05	0.988678
ENSG00000132507.16	0.00120449	0.0148448
ENSG00000132613.13	0.0081456	0.0558756
ENSG00000132622.9	0.0051657	0.706526
ENSG00000132793.10	-0.0134569	0.27551
ENSG00000133019.10	0.0029023	0.469856
ENSG00000133055.7	-0.127528	0.512146
ENSG00000133318.12	0.000103638	0.883762
ENSG00000133794.16	-0.0162259	0.391593
ENSG00000133805.14	-0.0137058	0.344136
ENSG00000133961.18	-0.00550405	0.279987
ENSG00000134013.14	0.00343317	0.00576579
ENSG00000134317.16	0.000294277	0.898398
ENSG00000134318.12	0.00211109	0.284009
ENSG00000134398.11	0.0277938	0.224712
ENSG00000134480.12	-0.00701394	0.560222
ENSG00000134668.11	0.00522403	0.681315
ENSG00000134684.9	0.0036894	0.00279569
ENSG00000134697.11	0.00472143	0.0509175
ENSG00000134769.20	-0.00110767	0.762894
ENSG00000134780.8	-0.0449428	0.0438258
ENSG00000135093.11	0.000220736	0.985262
ENSG00000135144.6	-0.0095104	0.711235
ENSG00000135365.14	-0.00584975	0.516303
ENSG00000135414.8	0.0259633	0.0392393
ENSG00000135451.11	0.00642695	0.363002
ENSG00000135597.17	0.00760772	0.0785015
ENSG00000135678.10	-0.00118831	0.736506
ENSG00000135749.17	0.000591843	0.949679
ENSG00000135778.10	-0.00212136	0.663123
ENSG00000135945.8	-0.0173185	0.1636
ENSG00000136048.12	0.000269736	0.956153
ENSG00000136059.13	-0.00541997	0.783024
ENSG00000136478.6	-0.00448222	0.0528046
ENSG00000136854.16	0.00126887	0.784351
ENSG00000136877.13	0.000701917	0.836797
ENSG00000136881.10	0.627086	0.633727
ENSG00000136930.11	0.00236931	0.136933
ENSG00000137070.16	-0.0087912	0.644713
ENSG00000137154.11	9.35206e-05	0.341668
ENSG00000137200.11	-0.00867565	0.146603
ENSG00000137267.5	0.00823545	0.226637
ENSG00000137274.11	0.00806194	0.510075
ENSG00000137563.10	0.00247357	0.306546
ENSG00000137575.10	0.0015672	0.0748613
ENSG00000137825.9	0.0141769	0.664484
ENSG00000137841.10	-0.000650836	0.944027
ENSG00000137843.10	0.76603	0.000475252
ENSG00000137877.9	-0.00288383	0.783662
ENSG00000138061.10	-0.000144341	0.728121
ENSG00000138073.12	0.00738246	0.0597825
ENSG00000138100.12	-0.00714316	0.935879
ENSG00000138193.13	-0.000392949	0.940075
ENSG00000138794.8	-0.000825115	0.91605
ENSG00000138834.11	0.00147827	0.670585
ENSG00000139044.9	0.00122432	0.694302
ENSG00000139540.10	-0.180904	0.815589
ENSG00000139645.9	0.00417803	0.158802
ENSG00000139835.12	-0.0261517	0.0227698
ENSG00000140093.8	-0.26615	0.200418
ENSG00000140104.12	-0.01944	0.0648825
ENSG00000140199.10	0.00632227	0.492804
ENSG00000140854.11	0.0195551	0.035636
ENSG00000140859.14	0.0126092	0.0108597
ENSG00000140876.10	-0.108268	0.23709
ENSG00000140931.18	0.00165963	0.574103
ENSG00000140939.13	0.012058	0.00195342
ENSG00000140990.13	0.00133385	0.493326
ENSG00000141068.12	-0.0033629	0.639058
ENSG00000141179.12	-0.000796255	0.918247
ENSG00000141219.14	-0.0122069	0.165251
ENSG00000141349.7	0.0016067	0.397263
ENSG00000141401.10	0.00128207	0.602189
ENSG00000141447.15	-0.00526607	0.100118
ENSG00000141503.14	-0.0024665	0.545818
ENSG00000141522.10	0.00012685	0.906408
ENSG00000141564.12	-0.00832258	0.19717
ENSG00000141744.3	-0.00241278	0.604505
ENSG00000141934.8	0.00376303	0.00756988
ENSG00000142186.15	0.00560164	0.0297226
ENSG00000142197.11	-0.00111181	0.595462
ENSG00000142208.14	0.00103242	0.410471
ENSG00000142632.15	-0.000619111	0.900438
ENSG00000143125.5	-0.00264924	0.834653
ENSG00000143157.10	0.00182048	0.329089
ENSG00000143198.11	0.00124207	0.334676
ENSG00000143318.11	-0.00973706	0.695614
ENSG00000143340.6	0.0040505	0.989368
ENSG00000143382.12	0.0054117	0.243162
ENSG00000143442.20	-0.000889011	0.645355
ENSG00000143494.14	-0.00207451	0.723803
ENSG00000143552.8	-0.073355	0.667492
ENSG00000143553.9	-0.00131302	0.857815
ENSG00000143621.15	0.00100048	0.0700797
ENSG00000143748.16	0.00194705	0.629922
ENSG00000143819.11	-0.000193516	0.828718
ENSG00000143845.13	-0.0041321	0.115941
ENSG00000143862.6	0.00139731	0.636308
ENSG00000143952.18	0.00704064	0.178538
ENSG00000143977.12	0.00544205	0.19257
ENSG00000143994.12	-0.00423072	0.959626
ENSG00000144045.12	-0.0195805	0.518392
ENSG00000144395.16	4.90413e-05	0.999002
ENSG00000144596.10	-0.014375	0.868193
ENSG00000144597.12	0.000955039	0.832447
ENSG00000144746.6	-0.002275	0.173958
ENSG00000144857.13	0.000119766	0.960297
ENSG00000145002.11	0.648789	0.198473
ENSG00000145244.10	-0.00228234	0.87291
ENSG00000145246.12	0.000973728	0.903166
ENSG00000145386.8	0.00717028	0.018598
ENSG00000145416.12	-0.00435341	0.683705
ENSG00000145715.13	-0.00079408	0.793974
ENSG00000145721.10	-0.0206733	0.748057
ENSG00000145901.13	-0.00276602	0.298219
ENSG00000146223.13	0.00072088	0.239476
ENSG00000146426.16	0.00637994	0.576544
ENSG00000146477.5	0.00693822	0.771793
ENSG00000146556.13	0.00847784	0.88895
ENSG00000146830.9	-0.00383422	0.273417
ENSG00000147119.3	0.0504645	0.380139
ENSG00000147465.10	-0.0767907	0.532339
ENSG00000147573.15	-0.205425	0.342688
ENSG00000147912.11	0.0235271	0.240263
ENSG00000148082.8	0.00679001	0.746373
ENSG00000148204.10	-0.0565207	0.692861
ENSG00000148337.18	0.000356254	0.92222
ENSG00000148358.18	0.00213887	0.1651
ENSG00000148362.9	0.00459969	0.10666
ENSG00000148600.13	0.0153868	0.0199178
ENSG00000148702.13	0.0108217	0.67161
ENSG00000148824.17	-0.0141926	0.688936
ENSG00000148925.9	-0.0213485	0.075533
ENSG00000149179.12	-0.0172503	0.0607259
ENSG00000149182.13	-0.00614507	0.0678396
ENSG00000149243.14	-0.0250056	0.154139
ENSG00000149273.13	-9.03582e-05	0.461653
ENSG00000149328.13	0.00251048	0.594435
ENSG00000149346.13	-0.00320209	0.782281
ENSG00000149489.7	0.0470317	0.0374698
ENSG00000149541.8	0.0065473	0.0906041
ENSG00000149782.10	0.00769982	0.0310733
ENSG00000149922.9	-0.017819	0.771535
ENSG00000149923.12	-0.00038776	0.813195
ENSG00000149929.14	-0.00845693	0.253698
ENSG00000149930.16	-0.00298525	0.435924
ENSG00000149968.10	0.00271111	0.443134
ENSG00000149970.13	0.00675264	0.898493
ENSG00000150281.6	-0.0465622	0.0332188
ENSG00000151117.7	-0.00018494	0.944085
ENSG00000151303.11	-0.6939	0.389371
ENSG00000151364.14	-0.0392946	0.111638
ENSG00000151365.2	-0.00201482	0.522387
ENSG00000151366.11	-0.0034811	0.193583
ENSG00000152382.5	0.00418283	0.768786
ENSG00000153162.8	0.0103592	0.00764787
ENSG00000153944.9	-0.00295723	0.0497771
ENSG00000154040.19	-0.0113325	0.434598
ENSG00000154146.11	0.0475961	0.00143543
ENSG00000154175.15	-0.00396312	0.309572
ENSG00000154222.13	-0.00167462	0.839535
ENSG00000154639.17	0.00416514	0.0070114
ENSG00000154640.13	0.00486924	0.0906348
ENSG00000154864.10	-0.00183028	0.467212
ENSG00000154945.6	-0.000704595	0.793162
ENSG00000155026.15	0.888151	0.0936492
ENSG00000155252.13	-0.0134488	0.248904
ENSG00000155363.17	-0.00404638	0.351325
ENSG00000155366.15	0.000548377	0.51138
ENSG00000155506.15	0.00141396	0.2437
ENSG00000155749.11	-0.0593268	0.815454
ENSG00000155850.7	6.3726e-06	0.995642
ENSG00000155974.10	-0.0166767	0.269192
ENSG00000156096.11	-0.000240228	0.859511
ENSG00000156381.7	0.00391884	0.64968
ENSG00000156642.15	4.988e-05	0.97897
ENSG00000157017.14	0.00325005	0.956024
ENSG00000157020.16	0.00183503	0.205325
ENSG00000157077.13	-0.00287512	0.662685
ENSG00000157111.11	-0.0304176	0.704946
ENSG00000157216.14	0.00228624	0.220253
ENSG00000157368.9	0.00535905	0.14603
ENSG00000157593.15	0.00211389	0.261743
ENSG00000157833.11	-0.00194444	0.906585
ENSG00000157851.15	-0.0088085	0.595482
ENSG00000157856.9	-0.049081	0.592074
ENSG00000158008.8	0.00360168	0.29977
ENSG00000158014.13	-0.0790212	0.0667104
ENSG00000158158.10	-0.00432692	0.273994
ENSG00000158417.9	0.000217591	0.826104
ENSG00000158483.14	0.00147646	0.942878
ENSG00000158526.7	-0.00450877	0.347975
ENSG00000158552.11	0.0094874	0.114816
ENSG00000158578.17	0.47779	0.357421
ENSG00000158623.13	-0.00291899	0.395994
ENSG00000158792.14	0.0129127	0.217615
ENSG00000158828.5	-0.00283481	0.804906
ENSG00000159023.17	0.000812605	0.790756
ENSG00000159184.7	0.00976304	0.161891
ENSG00000159247.11	0.0791725	0.00713324
ENSG00000159263.14	0.0015935	0.80956
ENSG00000159267.13	0.00635618	0.169474
ENSG00000159374.16	-0.0160105	0.574805
ENSG00000159377.9	0.00127988	0.00605706
ENSG00000159792.8	0.0144839	0.0248318
ENSG00000159842.13	-0.00291407	0.378373
ENSG00000160050.13	0.0211436	0.120567
ENSG00000160111.11	0.00246309	0.587691
ENSG00000160172.9	-0.0242478	0.411067
ENSG00000160214.11	0.00932137	0.000151358
ENSG00000160325.13	0.00153604	0.673351
ENSG00000160326.12	-0.00343974	0.744765
ENSG00000160404.16	0.00766501	0.355781
ENSG00000160469.15	0.0187431	0.180265
ENSG00000160781.14	0.011956	0.245299
ENSG00000160818.15	0.00433242	0.363982
ENSG00000160883.9	-0.0117561	0.511817
ENSG00000160951.3	0.762044	0.00056561
ENSG00000161082.11	-0.0373723	0.483221
ENSG00000161091.11	0.0074058	0.00847549
ENSG00000161281.9	-0.00036806	0.965265
ENSG00000161395.11	1.68497e-05	0.97452
ENSG00000161682.13	0.02088	0.176415
ENSG00000161800.11	0.00489768	0.0979157
ENSG00000162006.8	0.011765	0.830217
ENSG00000162066.13	0.00674712	0.342194
ENSG00000162078.10	-0.00117927	0.358495
ENSG00000162241.11	-0.0137912	0.42956
ENSG00000162434.10	-0.00171543	0.208561
ENSG00000162437.13	0.0077036	0.199536
ENSG00000162522.9	0.000654121	0.517737
ENSG00000162572.18	-0.00498119	0.82728
ENSG00000162728.4	0.361592	0.226496
ENSG00000162729.12	0.00191018	0.230536
ENSG00000162885.11	0.00135863	0.906279
ENSG00000162892.14	-0.0333614	0.243757
ENSG00000162894.10	-0.0131227	0.141653
ENSG00000162976.11	-0.00528642	0.325861
ENSG00000163154.5	-0.0114498	0.702799
ENSG00000163155.10	0.0231276	0.0420034
ENSG00000163156.10	0.00959679	0.0142799
ENSG00000163159.10	0.00567714	0.0260103
ENSG00000163249.8	0.00711813	0.457042
ENSG00000163251.3	0.00168782	0.902737
ENSG00000163380.14	0.0574434	0.427901
ENSG00000163382.10	0.00103506	0.479819
ENSG00000163485.14	-0.00333957	0.37227
ENSG00000163499.10	-0.0432939	0.695946
ENSG00000163697.15	8.82457e-05	0.949816
ENSG00000163703.16	0.00334367	0.575512
ENSG00000163704.10	-0.0105715	0.17255
ENSG00000163794.6	-0.0830621	0.408024
ENSG00000163806.14	0.114896	0.161788
ENSG00000163879.10	-0.010547	0.00238465
ENSG00000163938.15	-0.000968311	0.747455
ENSG00000164054.14	-0.00152422	0.300687
ENSG00000164062.11	-0.00165725	0.482024
ENSG00000164070.10	0.00650927	0.132576
ENSG00000164099.3	-0.0055603	0.534373
ENSG00000164296.6	-0.0450766	0.110045
ENSG00000164597.12	0.00316201	0.549197
ENSG00000164649.18	0.0010711	0.721885
ENSG00000164663.12	0.000691391	0.877904
ENSG00000164674.14	-0.0122943	0.615815
ENSG00000164742.13	3.5955e-05	0.967192
ENSG00000164776.8	-0.00134235	0.770331
ENSG00000164808.15	-0.00271175	0.485211
ENSG00000164855.14	-0.00306888	0.654297
ENSG00000164889.11	0.000745366	0.762264
ENSG00000164896.18	0.00288787	0.277482
ENSG00000164902.12	0.00178708	0.815825
ENSG00000164932.11	0.00252211	0.070152
ENSG00000165125.16	0.00314	0.299618
ENSG00000165131.6	-1.69324	0.161229
ENSG00000165458.12	-0.00101879	0.648497
ENSG00000165905.15	0.00064755	0.876801
ENSG00000165983.13	9.38544e-07	0.999914
ENSG00000165985.9	0.106923	0.0461435
ENSG00000166004.13	0.0104264	0.180428
ENSG00000166171.11	-0.0106612	0.32127
ENSG00000166311.8	-0.000198092	0.971352
ENSG00000166313.17	-0.0115694	0.156003
ENSG00000166428.11	-0.0328812	0.057695
ENSG00000166507.15	-0.59005	0.000198748
ENSG00000166575.15	-0.00774186	0.180715
ENSG00000166763.7	-0.195651	0.498813
ENSG00000166816.12	-0.00972276	0.499672
ENSG00000166851.13	0.00857927	0.00238253
ENSG00000166856.2	-0.310714	0.509506
ENSG00000166860.2	0.0016445	0.938408
ENSG00000166960.15	-0.0354393	0.716484
ENSG00000166971.15	0.00986844	0.247289
ENSG00000167094.14	-0.335775	0.0191983
ENSG00000167105.6	0.036363	0.399263
ENSG00000167106.10	-0.000619809	0.555483
ENSG00000167118.9	0.00612479	0.176983
ENSG00000167220.10	-0.0107788	0.26793
ENSG00000167280.15	-0.0059962	0.536393
ENSG00000167281.17	-0.0602115	0.819646
ENSG00000167311.12	0.132648	0.22677
ENSG00000167460.13	0.000189879	0.562928
ENSG00000167468.15	0.000343029	0.582143
ENSG00000167513.7	0.0109504	0.0386393
ENSG00000167535.6	0.00527407	0.0792841
ENSG00000167543.14	0.00296449	0.442316
ENSG00000167549.17	0.00323754	0.0646018
ENSG00000167644.10	0.000339211	0.910429
ENSG00000167645.15	0.00644651	0.00178486
ENSG00000167670.14	0.00655504	0.153755
ENSG00000167671.10	0.00376604	0.0662857
ENSG00000167748.9	0.00503015	0.737001
ENSG00000167771.5	0.00245343	0.432893
ENSG00000167778.7	0.000438503	0.892549
ENSG00000167863.10	-0.0020534	0.238953
ENSG00000167889.11	0.0201333	2.69724e-05
ENSG00000167930.14	0.000361633	0.886
ENSG00000167967.14	0.00323426	0.494099
ENSG00000167968.11	-0.0466692	0.499032
ENSG00000167969.11	-0.000369709	0.885903
ENSG00000167984.15	-0.0282059	0.201464
ENSG00000168056.13	-6.73353e-05	0.964697
ENSG00000168060.13	-0.0779852	0.28044
ENSG00000168061.12	0.00760876	0.322657
ENSG00000168234.11	-0.00289043	0.549206
ENSG00000168256.16	0.00612391	0.133423
ENSG00000168268.9	0.00567166	8.69404e-07
ENSG00000168350.7	-0.0025478	0.110533
ENSG00000168427.8	0.120882	0.022946
ENSG00000168477.16	-0.00377702	0.438806
ENSG00000168743.11	-0.000102423	0.826033
ENSG00000168802.11	0.00234914	0.520762
ENSG00000168827.13	-0.00338239	0.342326
ENSG00000168913.6	-0.00504802	0.63946
ENSG00000168995.12	-0.0847304	0.339836
ENSG00000169188.4	-0.00272242	0.636799
ENSG00000169258.6	0.0145073	0.0943761
ENSG00000169372.11	0.00727353	0.791689
ENSG00000169583.12	0.0111396	0.12847
ENSG00000169641.12	0.00352201	0.539365
ENSG00000169692.11	0.00434523	0.0409087
ENSG00000169718.16	-0.00137276	0.464779
ENSG00000169727.11	-0.00122978	0.560732
ENSG00000169764.13	0.00148136	0.216874
ENSG00000169885.8	-0.135089	0.34177
ENSG00000169962.4	0.0138969	0.376685
ENSG00000169972.10	0.0145825	0.0878943
ENSG00000169994.17	0.0406097	0.0692015
ENSG00000170035.14	0.00318824	0.398273
ENSG00000170049.8	-0.0497275	0.597919
ENSG00000170075.8	-0.0295073	0.437287
ENSG00000170085.16	0.00355105	0.823323
ENSG00000170142.10	0.00405103	0.327404
ENSG00000170271.9	-0.00325088	0.377739
ENSG00000170291.13	0.0103222	0.315816
ENSG00000170382.10	0.00139958	0.648873
ENSG00000170423.11	0.0263802	0.599688
ENSG00000170473.15	0.00153627	0.821009
ENSG00000170684.7	0.00280982	0.885476
ENSG00000170776.18	-0.000330967	0.840185
ENSG00000170779.10	0.0153459	0.0140187
ENSG00000171103.9	0.0343161	0.224634
ENSG00000171262.10	0.0102714	0.0314201
ENSG00000171462.13	-0.0915643	0.263147
ENSG00000171603.15	0.000283873	0.742514
ENSG00000171608.14	-0.00287405	0.647165
ENSG00000171777.14	0.0143591	0.870677
ENSG00000171817.15	-0.0155525	0.771036
ENSG00000171840.10	0.0172556	0.358491
ENSG00000171889.3	0.123195	0.62623
ENSG00000172059.9	0.00921958	0.140241
ENSG00000172247.3	0.0558823	0.0815949
ENSG00000172346.13	0.0151686	0.691694
ENSG00000172354.8	0.000297424	0.719968
ENSG00000172367.14	-2.50067	0.0653816
ENSG00000172460.13	0.0991936	0.00646302
ENSG00000172476.3	-0.505922	0.154562
ENSG00000172500.11	0.00315697	0.449336
ENSG00000172531.13	6.54939e-05	0.952131
ENSG00000172543.6	-0.0461299	0.0524371
ENSG00000172575.10	-0.00142914	0.715812
ENSG00000172613.6	-0.00429952	0.684979
ENSG00000172640.3	-0.420495	0.734598
ENSG00000172650.11	-0.673371	0.236513
ENSG00000172725.12	-0.000626317	0.674523
ENSG00000172889.14	0.00515155	0.0214706
ENSG00000172935.8	-0.00579327	0.774268
ENSG00000173011.11	-0.00294676	0.620536
ENSG00000173124.13	-0.370792	0.464567
ENSG00000173137.10	0.019013	0.00478391
ENSG00000173145.10	-0.0243369	0.0790664
ENSG00000173338.11	-0.00635919	0.841987
ENSG00000173418.10	0.00101895	0.692712
ENSG00000173442.10	0.000727254	0.85482
ENSG00000173482.15	-0.00509754	0.265414
ENSG00000173846.11	0.0028353	0.779046
ENSG00000173947.12	-0.0379551	0.0105709
ENSG00000174243.8	-0.00201835	0.45283
ENSG00000174292.11	0.00198868	0.781682
ENSG00000174521.7	0.0934071	0.427005
ENSG00000174606.11	-0.00693858	0.286107
ENSG00000175130.6	0.000484151	0.322074
ENSG00000175206.9	-4.93003	0.00838764
ENSG00000175592.7	0.00810117	0.235248
ENSG00000175602.3	0.00486533	0.238939
ENSG00000175634.13	0.0010833	0.770731
ENSG00000176125.4	0.0379729	0.411072
ENSG00000176871.7	0.00690357	0.0112645
ENSG00000176884.13	0.0263771	0.0114959
ENSG00000177045.7	0.00367479	0.803125
ENSG00000177191.2	-0.00403928	0.884267
ENSG00000177370.4	0.00110138	0.934986
ENSG00000177485.6	-0.00523466	0.27537
ENSG00000177548.11	0.0012591	0.735537
ENSG00000177628.14	0.0027715	0.230096
ENSG00000177731.14	-0.00237173	0.165621
ENSG00000177791.11	-0.0141614	0.633046
ENSG00000177839.6	0.0371597	0.0388599
ENSG00000177954.10	-0.000261197	0.451849
ENSG00000178028.12	-0.00785848	0.377103
ENSG00000178149.15	-0.0093102	0.184989
ENSG00000178252.16	-0.00415407	0.0455518
ENSG00000178297.11	-0.0238292	0.757362
ENSG00000178342.4	0.0458705	0.769351
ENSG00000178460.16	0.0820971	0.00670447
ENSG00000178814.14	0.00792652	0.040415
ENSG00000178821.11	0.00232752	0.941338
ENSG00000178947.8	-0.0406719	0.173232
ENSG00000179051.12	0.000810953	0.39102
ENSG00000179057.12	0.0157119	0.637753
ENSG00000179222.16	0.00039306	0.468818
ENSG00000179262.8	0.00582478	0.00132946
ENSG00000179270.6	0.0939915	0.269109
ENSG00000179271.2	0.00371884	0.0522721
ENSG00000179299.15	-0.0164146	0.432744
ENSG00000179361.16	-0.0371368	0.391642
ENSG00000179564.3	-0.693831	0.528893
ENSG00000179832.16	0.00731133	0.0207712
ENSG00000179886.5	0.0239771	4.68732e-05
ENSG00000180061.8	0.0403673	0.618971
ENSG00000180098.8	0.0134932	0.344749
ENSG00000180279.5	0.53885	0.249618
ENSG00000180385.7	0.00732007	0.799462
ENSG00000180448.9	-0.00298691	0.489219
ENSG00000180900.15	0.00291772	0.0130423
ENSG00000180929.5	-0.333192	0.505178
ENSG00000181856.13	0.0153103	0.700492
ENSG00000181885.17	0.00271931	0.0460278
ENSG00000182048.10	0.732837	0.0169985
ENSG00000182179.9	-0.00846059	0.071792
ENSG00000182196.12	0.0871417	0.167413
ENSG00000182199.9	0.0034193	0.0305546
ENSG00000182484.13	-0.023956	0.435306
ENSG00000182518.12	-0.0110357	0.550688
ENSG00000182578.12	-0.00033682	0.869693
ENSG00000182759.3	0.240406	0.0296373
ENSG00000182796.11	-0.0345448	0.0963092
ENSG00000182866.15	-0.0121636	0.217075
ENSG00000183020.12	-0.00015566	0.972127
ENSG00000183060.14	-0.0308262	0.410955
ENSG00000183066.13	0.0701166	0.450441
ENSG00000183246.6	1.76516	0.00029646
ENSG00000183426.14	-0.0441612	0.318757
ENSG00000183723.11	0.00395176	0.0272708
ENSG00000183773.14	0.00767577	0.872196
ENSG00000183793.12	0.0538194	0.479661
ENSG00000183798.4	0.000840853	0.951903
ENSG00000183889.11	0.11041	0.163069
ENSG00000183963.17	0.00602136	0.0070415
ENSG00000184058.11	0.00795231	0.200485
ENSG00000184209.14	-0.00294366	0.785576
ENSG00000184281.13	0.00345203	0.46393
ENSG00000184343.9	0.0129532	0.171791
ENSG00000184363.8	0.00125731	0.556379
ENSG00000184481.15	-0.0141884	0.173456
ENSG00000184575.10	0.00176844	0.114534
ENSG00000184697.6	0.00108532	0.784638
ENSG00000184709.7	0.00506426	0.592707
ENSG00000184860.8	0.0073176	0.358325
ENSG00000184908.16	-0.453293	0.303174
ENSG00000184956.14	0.000199562	0.67539
ENSG00000184979.9	-0.00777332	0.427099
ENSG00000184990.11	0.00459248	0.210676
ENSG00000185038.13	0.193836	0.000291133
ENSG00000185133.12	-0.0031844	0.321625
ENSG00000185187.11	-0.000205872	0.947655
ENSG00000185324.20	0.00440771	0.411543
ENSG00000185340.14	0.00572735	0.151786
ENSG00000185507.18	-0.00663666	0.0849099
ENSG00000185519.8	0.0340056	0.672087
ENSG00000185567.6	0.00306761	3.06837e-05
ENSG00000185614.4	0.0559052	0.0108987
ENSG00000185615.14	-0.0599268	0.520818
ENSG00000185633.9	0.00244849	0.0926307
ENSG00000185792.8	0.483243	0.275121
ENSG00000185838.12	0.0369132	0.00351124
ENSG00000185864.15	-0.0187534	0.763684
ENSG00000185896.10	-0.000278084	0.644891
ENSG00000185915.5	0.0223497	0.709664
ENSG00000186153.15	-0.00802414	0.308337
ENSG00000186187.10	0.0084835	0.223126
ENSG00000186193.8	0.0082067	0.000182216
ENSG00000186234.7	0.544808	0.541222
ENSG00000186364.10	-0.0521954	0.312885
ENSG00000186471.11	-0.150205	0.481637
ENSG00000186625.12	0.0120925	0.260613
ENSG00000186897.4	0.0279345	0.208564
ENSG00000186951.15	0.00481219	0.51487
ENSG00000187024.12	1.48013	0.0248067
ENSG00000187091.12	0.00665988	0.330166
ENSG00000187325.4	-0.00251059	0.66699
ENSG00000187479.5	0.00784486	0.147532
ENSG00000187583.9	0.0477453	0.00941131
ENSG00000187595.13	0.00687681	0.572936
ENSG00000187634.9	0.0151971	0.00898836
ENSG00000187642.8	0.0426051	0.0865118
ENSG00000187682.1	-0.882234	0.520943
ENSG00000187838.15	0.282525	0.202567
ENSG00000187848.11	0.0220961	0.0106114
ENSG00000187959.8	-0.117439	0.68238
ENSG00000187980.6	-1.53677	0.0140844
ENSG00000188002.9	-0.0371526	0.159626
ENSG00000188056.10	0.261915	0.808123
ENSG00000188070.9	0.0249087	0.00448787
ENSG00000188092.13	0.0508691	0.178982
ENSG00000188163.7	0.318309	0.448283
ENSG00000188186.9	-0.000142207	0.951445
ENSG00000188229.5	0.000948416	0.101471
ENSG00000188269.7	-0.549707	0.242455
ENSG00000188396.3	-0.436608	0.366707
ENSG00000188452.12	0.00264384	0.822543
ENSG00000188486.3	0.00596233	0.026418
ENSG00000188505.4	0.00191803	0.0303947
ENSG00000188525.3	0.315585	0.213719
ENSG00000188613.6	0.00499567	0.239706
ENSG00000188779.9	-0.253321	0.461076
ENSG00000188786.9	0.00719366	0.403183
ENSG00000188976.9	0.00333338	0.0473291
ENSG00000189046.9	0.0189519	0.0830322
ENSG00000189077.9	-0.00341788	0.591886
ENSG00000189269.11	-1.02492	0.0816341
ENSG00000189350.11	-0.101136	0.509742
ENSG00000189409.11	-0.260642	0.701033
ENSG00000196110.6	0.0787949	0.112957
ENSG00000196123.11	0.0155551	0.245517
ENSG00000196169.13	0.0143748	0.362719
ENSG00000196187.10	0.00285262	0.115231
ENSG00000196296.12	-0.0845536	0.311797
ENSG00000196305.16	0.00358229	0.00719577
ENSG00000196396.8	-0.00149265	0.267532
ENSG00000196405.11	-0.000134339	0.770564
ENSG00000196436.8	0.0202421	0.45608
ENSG00000196455.6	-0.0102648	0.138884
ENSG00000196497.14	-0.00254076	0.90709
ENSG00000196511.12	0.00626996	0.893585
ENSG00000196517.10	-0.00046041	0.870906
ENSG00000196557.9	0.000464312	0.715963
ENSG00000196562.13	0.000105843	0.801172
ENSG00000196588.13	-0.00153465	0.819246
ENSG00000196666.4	0.068633	0.722645
ENSG00000196696.11	-0.0303041	0.426287
ENSG00000196700.6	-0.00425935	0.363152
ENSG00000196878.11	-1.02567e-05	0.991398
ENSG00000196950.12	0.0019968	0.616485
ENSG00000196976.6	0.00686954	0.0661976
ENSG00000196979.1	1.71059	0.0401471
ENSG00000197226.11	-0.000593836	0.738436
ENSG00000197586.11	0.000451753	0.867936
ENSG00000197614.9	0.00147059	0.383947
ENSG00000197629.5	-0.00464711	0.206738
ENSG00000197746.12	-1.19251e-05	0.933004
ENSG00000197753.8	-0.0819526	0.338641
ENSG00000197785.12	0.0109838	0.0135204
ENSG00000197885.9	-0.0240758	0.301267
ENSG00000197893.12	-1.49092	0.0498854
ENSG00000197956.8	0.000447665	1.17691e-05
ENSG00000197982.13	0.00286637	0.19089
ENSG00000197989.12	0.0105896	0.378242
ENSG00000197993.6	-0.256256	0.0352133
ENSG00000198026.7	0.00483139	0.685586
ENSG00000198033.10	-0.185533	0.534419
ENSG00000198089.13	-0.0136772	0.0926632
ENSG00000198208.10	0.0291239	0.137956
ENSG00000198231.11	-0.00488182	0.0531048
ENSG00000198252.10	0.0134128	0.00072104
ENSG00000198467.12	0.000881749	0.179415
ENSG00000198517.8	0.00982096	0.0817922
ENSG00000198643.5	-0.00193344	0.758341
ENSG00000198646.12	-0.00154088	0.592427
ENSG00000198720.11	0.00535635	0.396437
ENSG00000198832.9	0.000778819	0.454763
ENSG00000198853.10	0.0103857	0.060301
ENSG00000198931.9	0.00259339	0.0403374
ENSG00000198937.8	0.0128267	0.0924633
ENSG00000198944.5	-0.059256	0.00128121
ENSG00000198951.10	-0.00227138	0.678623
ENSG00000200378.1	-1.81976	0.3546
ENSG00000202343.1	-1.14109	0.113679
ENSG00000202533.1	-0.54997	0.479994
ENSG00000203667.8	-0.00234098	0.905207
ENSG00000203734.10	-0.188842	0.169905
ENSG00000203772.7	0.00421188	0.896282
ENSG00000203804.4	0.0379758	0.453067
ENSG00000204019.4	0.0115206	0.543149
ENSG00000204084.11	-0.00391972	0.794925
ENSG00000204165.5	-0.495463	0.184902
ENSG00000204172.10	0.0342805	0.326552
ENSG00000204290.9	-2.6991	0.212034
ENSG00000204396.9	0.0248399	0.209459
ENSG00000204420.7	-0.0100626	0.926546
ENSG00000204421.2	-0.0197178	0.475059
ENSG00000204475.8	-0.167791	0.250706
ENSG00000204482.9	-0.0213147	0.220006
ENSG00000204560.8	0.00214986	0.778268
ENSG00000204564.10	0.0182711	0.233374
ENSG00000204618.7	0.00412939	0.744071
ENSG00000204619.6	0.0039609	0.299572
ENSG00000204644.8	-0.00383822	0.849478
ENSG00000204655.10	0.0184561	0.38035
ENSG00000204710.2	-0.00053992	0.886645
ENSG00000204791.7	0.251102	0.0592907
ENSG00000205090.7	-0.0766286	0.693993
ENSG00000205643.9	0.0257206	0.321257
ENSG00000205702.9	-0.249142	0.381175
ENSG00000205744.8	-0.0108165	0.356429
ENSG00000206384.9	-0.0194697	0.466846
ENSG00000206530.7	-0.0106136	0.25969
ENSG00000206561.11	-0.0974025	0.201939
ENSG00000206567.8	-0.0624611	0.114564
ENSG00000206739.1	-1.2786	0.492127
ENSG00000207563.1	-1.46439	0.533389
ENSG00000207721.1	0.0370511	0.932835
ENSG00000207864.2	-0.810632	0.510555
ENSG00000210195.2	0.0543882	0.838399
ENSG00000210196.2	0.00188468	0.242767
ENSG00000211445.10	0.00203923	0.000647445
ENSG00000211450.8	-0.00210958	0.517503
ENSG00000211584.12	-0.0038098	0.641968
ENSG00000213071.9	0.0745094	0.771142
ENSG00000213373.6	-0.0750315	0.844263
ENSG00000213590.2	0.523595	0.105116
ENSG00000213694.3	-0.000189993	0.932539
ENSG00000213722.7	0.000220686	0.903855
ENSG00000213937.3	0.0088849	0.289787
ENSG00000214081.6	-0.0892468	0.421711
ENSG00000214595.10	0.0314242	0.318992
ENSG00000214655.9	-0.00992674	0.0933679
ENSG00000214706.9	0.00457155	0.385567
ENSG00000214733.7	-0.0552339	0.571415
ENSG00000214765.7	-0.0151546	0.524639
ENSG00000214860.4	0.270572	0.593367
ENSG00000214867.3	-0.178669	0.647854
ENSG00000215187.8	-0.0270648	0.59467
ENSG00000215458.7	0.0436607	0.0829795
ENSG00000215859.7	0.0933787	0.556014
ENSG00000215914.4	-0.0295467	0.945539
ENSG00000217442.3	0.0156	0.758742
ENSG00000218537.1	0.460766	0.0175155
ENSG00000219433.2	-0.186858	0.810154
ENSG00000220848.4	-0.0112881	0.931197
ENSG00000221539.1	0.159746	0.637671
ENSG00000221821.3	0.0117392	0.683036
ENSG00000221869.4	0.00186497	0.439754
ENSG00000222448.1	-2.45573	0.143572
ENSG00000222915.1	-0.922364	0.558516
ENSG00000223349.1	-0.274118	0.532852
ENSG00000223403.3	0.0387655	0.926077
ENSG00000223572.8	0.0278799	0.0440393
ENSG00000223705.8	-0.0032406	0.829185
ENSG00000223764.2	0.013586	0.11819
ENSG00000223802.6	0.0815525	0.114644
ENSG00000224016.2	-0.0817179	0.885064
ENSG00000224066.1	-0.326027	0.618974
ENSG00000224712.9	-0.179205	0.455941
ENSG00000224961.1	0.0262496	0.952303
ENSG00000224976.2	0.802854	0.463307
ENSG00000225031.1	-0.000943187	0.986438
ENSG00000225419.1	3.40681	0.00124686
ENSG00000225526.4	-0.0188814	0.78607
ENSG00000225531.1	-0.514094	0.712964
ENSG00000225840.2	-0.000166522	0.953938
ENSG00000225889.6	-0.0319956	0.785889
ENSG00000225969.1	-0.0925004	0.227181
ENSG00000226054.2	0.196184	0.0126316
ENSG00000226055.2	0.437918	0.348032
ENSG00000226686.6	0.0529719	0.312252
ENSG00000226950.5	0.00201268	0.474652
ENSG00000227039.5	-0.0692773	0.221635
ENSG00000227066.1	-0.0418001	0.5689
ENSG00000227070.1	-1.79641	0.126097
ENSG00000227218.6	0.0288218	0.541089
ENSG00000227473.1	0.0892752	0.200752
ENSG00000227620.4	-0.115613	0.792592
ENSG00000227632.2	-0.898553	0.0863021
ENSG00000227683.1	-0.0287375	0.922402
ENSG00000227711.2	-0.646317	0.462671
ENSG00000227741.1	-0.236094	0.459229
ENSG00000227742.1	0.158656	0.827548
ENSG00000228071.4	0.48551	0.00283803
ENSG00000228133.2	-0.742709	0.175389
ENSG00000228278.3	-0.0037829	0.590822
ENSG00000228474.4	0.00329447	0.0724943
ENSG00000228727.7	-0.257664	0.394036
ENSG00000228962.1	-1.7603	0.0839433
ENSG00000229122.1	-0.235159	0.677749
ENSG00000229352.1	-2.601	0.126875
ENSG00000229720.1	0.896148	0.0944955
ENSG00000229939.1	-0.451974	0.119873
ENSG00000229980.4	-0.0164368	0.837496
ENSG00000230262.5	0.476696	0.532658
ENSG00000230303.4	0.439092	0.767096
ENSG00000230646.1	-1.20438	0.195625
ENSG00000230756.1	0.569139	0.8325
ENSG00000230929.5	-0.613584	0.565721
ENSG00000231177.4	-0.183933	0.433462
ENSG00000231672.5	0.0510425	0.00207905
ENSG00000231760.4	0.156297	0.128653
ENSG00000231852.5	-0.00454351	0.858983
ENSG00000232218.1	-0.738127	0.646215
ENSG00000232608.1	0.124657	0.564756
ENSG00000232677.5	0.00746089	0.00893528
ENSG00000232742.3	0.370734	0.644691
ENSG00000233024.6	-0.789258	0.623322
ENSG00000233101.9	-0.000122471	0.989776
ENSG00000233330.1	0.117372	0.810882
ENSG00000233337.1	-0.355779	0.493671
ENSG00000233381.3	1.23426	0.000452692
ENSG00000233436.6	0.0177429	0.911039
ENSG00000233533.1	0.0645191	0.349115
ENSG00000233614.6	-0.673063	0.310716
ENSG00000233622.1	-0.000310321	0.784966
ENSG00000233750.3	0.427988	0.65634
ENSG00000233783.6	0.0240743	0.678616
ENSG00000233885.6	0.0246189	0.844528
ENSG00000234026.1	-0.555891	0.693412
ENSG00000234160.1	0.188161	0.000904911
ENSG00000234290.2	-0.160284	0.0915299
ENSG00000234345.2	-1.24303	0.463623
ENSG00000234354.3	0.0053397	0.895118
ENSG00000234405.1	-1.18903	0.400491
ENSG00000234409.6	-0.00508561	0.97447
ENSG00000234424.2	-0.20191	0.92489
ENSG00000234769.7	-0.122152	0.676386
ENSG00000234776.3	0.31538	0.78784
ENSG00000234848.1	0.069912	0.947126
ENSG00000235079.1	-0.123345	0.895423
ENSG00000235173.5	0.00666462	0.00490255
ENSG00000235194.7	-0.0279179	0.243896
ENSG00000235663.1	0.129328	0.90387
ENSG00000235821.1	-0.486442	0.662597
ENSG00000235961.5	0.0231127	0.509993
ENSG00000236194.3	0.0623228	0.63309
ENSG00000236289.2	-0.48994	0.368891
ENSG00000236397.3	-0.0226696	0.841321
ENSG00000236675.1	0.0272466	0.392989
ENSG00000236830.5	0.00665066	0.740189
ENSG00000237101.1	0.00328563	0.947838
ENSG00000237172.3	0.018803	0.0560363
ENSG00000237190.3	-0.00202598	0.823859
ENSG00000237214.3	0.0868214	0.418479
ENSG00000237264.4	0.17413	0.340489
ENSG00000237517.7	0.0147444	0.580051
ENSG00000237807.3	-0.0148423	0.306695
ENSG00000238151.1	-5.07865	0.0221069
ENSG00000238176.1	0.13924	0.292224
ENSG00000238178.5	-0.00522716	0.544242
ENSG00000238271.2	0.142981	0.650938
ENSG00000238279.1	0.145262	0.06985
ENSG00000239264.7	-0.0115263	0.602921
ENSG00000239402.3	-0.0587906	0.514712
ENSG00000239480.1	0.597582	0.383487
ENSG00000239486.1	-0.856131	0.268037
ENSG00000239779.5	-0.0050583	0.786321
ENSG00000239969.4	0.0497598	0.936556
ENSG00000240288.6	-0.23191	0.37506
ENSG00000240665.1	0.206472	0.706082
ENSG00000240674.1	1.95512	0.107621
ENSG00000240710.1	-0.760495	0.157584
ENSG00000240729.1	-0.0956511	0.860699
ENSG00000240972.1	0.00460435	0.0359356
ENSG00000241527.1	0.00820392	0.994693
ENSG00000241878.8	-0.00618556	0.13781
ENSG00000242094.1	0.0252563	0.53404
ENSG00000242252.1	-0.0116748	0.888753
ENSG00000242852.5	0.16335	0.556423
ENSG00000242876.3	-0.518687	0.690943
ENSG00000242952.1	0.372229	0.57251
ENSG00000242953.1	0.394724	0.380573
ENSG00000243708.7	-0.0482047	0.860482
ENSG00000243716.9	-0.0243569	0.494203
ENSG00000243960.1	-0.649051	0.441662
ENSG00000244038.8	0.00116558	0.241949
ENSG00000244165.1	0.0147589	0.462566
ENSG00000244383.1	0.600254	0.0472255
ENSG00000244607.4	-0.0398044	0.818251
ENSG00000244953.1	0.509039	0.118507
ENSG00000245317.2	-0.104776	0.407626
ENSG00000245910.7	0.000945667	0.382055
ENSG00000246548.3	-0.345913	0.651089
ENSG00000246596.5	-0.0070633	0.956648
ENSG00000247679.2	-0.114465	0.211763
ENSG00000247728.2	-1.7757	0.409749
ENSG00000248126.1	-0.961023	0.197157
ENSG00000248309.4	-0.61089	0.168024
ENSG00000248375.1	0.858226	0.0248405
ENSG00000248431.1	0.00215543	0.293232
ENSG00000248559.1	-0.906615	0.183377
ENSG00000248712.6	-0.114503	0.0789465
ENSG00000249035.5	0.140192	0.326803
ENSG00000249258.2	0.862687	0.321814
ENSG00000249635.1	-0.197995	0.822705
ENSG00000249751.3	0.0208994	0.583767
ENSG00000250107.1	0.0674742	0.549577
ENSG00000250794.2	0.0727081	0.897317
ENSG00000250906.1	-1.37007	0.0784773
ENSG00000250979.1	0.0349869	0.911855
ENSG00000251087.3	0.327704	0.310885
ENSG00000251179.1	0.0505499	0.673485
ENSG00000251271.3	0.654115	0.162675
ENSG00000251402.3	0.253415	0.785024
ENSG00000251603.1	0.420609	0.000690713
ENSG00000251604.1	0.0938621	0.5339
ENSG00000251669.4	-0.0177225	0.672167
ENSG00000252202.1	-2.99094	0.0802001
ENSG00000253304.1	-0.0144731	0.281508
ENSG00000253369.1	-0.00963975	0.893129
ENSG00000253641.4	0.197444	0.0277273
ENSG00000253649.2	0.115045	0.161345
ENSG00000253755.1	-0.00180461	0.351822
ENSG00000254204.1	-0.777433	0.134505
ENSG00000254338.1	0.27282	0.000476696
ENSG00000254404.1	-0.326377	0.387873
ENSG00000254429.1	0.587852	0.318561
ENSG00000254521.5	-0.156116	0.243176
ENSG00000254545.1	0.2041	0.712761
ENSG00000254605.1	0.0906605	0.573164
ENSG00000254777.4	-1.10383	0.0937935
ENSG00000254802.1	-0.171925	0.693193
ENSG00000254814.1	0.564487	0.0476983
ENSG00000254967.5	-0.197804	0.019862
ENSG00000254978.2	0.231035	0.383264
ENSG00000255191.1	-0.164598	0.745458
ENSG00000255200.1	0.299084	0.0865835
ENSG00000255282.5	0.0278914	0.928797
ENSG00000255366.1	0.133474	0.30005
ENSG00000255478.1	-4.19539	0.120361
ENSG00000255769.6	-0.0394596	0.415877
ENSG00000255823.2	-0.0324278	0.572146
ENSG00000255864.4	-0.44478	0.304711
ENSG00000255867.1	0.658194	0.0062752
ENSG00000255967.1	0.0726002	0.893442
ENSG00000256028.2	-0.419774	0.348769
ENSG00000256210.3	0.278683	0.435521
ENSG00000256269.5	0.00946423	0.295717
ENSG00000257283.1	0.176671	0.860934
ENSG00000257337.5	-0.00622114	0.372448
ENSG00000257390.4	0.732213	0.230384
ENSG00000257475.2	-0.221641	0.705907
ENSG00000257727.4	0.00479263	0.424396
ENSG00000257740.1	-0.0602075	0.869615
ENSG00000257989.1	0.0714151	0.598839
ENSG00000258130.6	0.0452528	0.946854
ENSG00000258301.3	0.161976	0.415837
ENSG00000258315.4	0.0982021	0.47739
ENSG00000258405.8	-0.10259	0.638403
ENSG00000258427.3	0.351121	0.125188
ENSG00000258539.1	0.370488	0.332159
ENSG00000258727.1	-0.0860924	0.212079
ENSG00000258819.1	-0.0325164	0.923
ENSG00000258890.5	-0.00721621	0.292846
ENSG00000258952.2	0.011862	0.952846
ENSG00000259040.4	0.1256	0.0027327
ENSG00000259399.1	0.894527	0.362412
ENSG00000259522.2	-1.53346	0.526153
ENSG00000259605.3	-0.0123194	0.857051
ENSG00000259647.1	2.87524	0.00349536
ENSG00000259648.1	-0.630691	0.676111
ENSG00000259762.1	-0.380674	0.778896
ENSG00000259780.3	-0.209097	0.810663
ENSG00000259803.5	-0.0557659	0.398964
ENSG00000259807.1	0.0337469	0.482023
ENSG00000259895.1	0.428482	0.0655396
ENSG00000259933.5	0.00529236	0.976683
ENSG00000260001.5	0.0100629	0.877244
ENSG00000260027.4	-0.003716	0.723106
ENSG00000260105.5	-0.105256	0.87688
ENSG00000260190.1	0.738612	0.0804752
ENSG00000260238.4	0.149846	0.214122
ENSG00000260500.1	-0.915424	0.369203
ENSG00000260517.2	0.0868127	0.20516
ENSG00000260645.1	-0.287572	0.294338
ENSG00000260762.1	-1.10546	0.506629
ENSG00000261052.4	-1.11908	0.534175
ENSG00000261123.1	0.0338379	0.820928
ENSG00000261295.1	0.0422007	0.582662
ENSG00000261456.4	0.045128	0.797411
ENSG00000261659.2	-0.0937469	0.2083
ENSG00000261668.1	0.518254	0.0428332
ENSG00000261707.1	-0.773903	0.434809
ENSG00000261884.2	-0.0584428	0.557399
ENSG00000261924.1	0.113292	0.250842
ENSG00000262006.1	-0.314565	0.584143
ENSG00000262877.4	-0.00281071	0.92884
ENSG00000262943.6	-0.038124	0.375862
ENSG00000263011.1	-0.303768	0.162757
ENSG00000263050.1	0.015457	0.959461
ENSG00000263214.1	-0.287881	0.0741007
ENSG00000263316.1	-0.334439	0.366072
ENSG00000263429.3	0.00651342	0.909693
ENSG00000263946.1	0.0352165	0.943094
ENSG00000264535.1	-1.21386	0.486853
ENSG00000264635.1	0.205163	0.757203
ENSG00000265185.4	0.0155582	0.746239
ENSG00000265912.1	0.24355	0.0677751
ENSG00000266171.1	0.33094	0.245599
ENSG00000266289.1	0.943374	0.000257034
ENSG00000266402.3	-0.0730308	0.603044
ENSG00000266733.4	0.709229	0.544792
ENSG00000266957.1	-0.344139	0.837597
ENSG00000267053.5	0.265811	0.114047
ENSG00000267074.1	-0.161469	0.458895
ENSG00000267369.1	-0.13708	0.233105
ENSG00000267383.5	0.191528	0.0142609
ENSG00000267405.1	0.483082	0.704674
ENSG00000267466.1	0.0845836	0.195421
ENSG00000267480.1	-0.00964208	0.929118
ENSG00000267484.1	1.05711	0.238563
ENSG00000267505.1	-0.258492	0.688559
ENSG00000267506.4	0.0422829	0.370844
ENSG00000267510.1	0.347508	0.162831
ENSG00000267605.4	-0.00492961	0.982306
ENSG00000267694.1	-0.0347976	0.792768
ENSG00000267724.1	0.176647	0.290242
ENSG00000267748.4	0.0357693	0.504561
ENSG00000267758.1	0.151874	0.554268
ENSG00000268104.2	0.00217586	0.00303936
ENSG00000268288.1	0.392693	0.587217
ENSG00000268575.1	-0.125664	0.121603
ENSG00000268717.1	-0.0209382	0.969128
ENSG00000268903.1	0.114153	0.0398439
ENSG00000268938.2	-1.04748	0.339134
ENSG00000268970.1	-0.00659942	0.968929
ENSG00000269349.1	0.276056	0.807429
ENSG00000269514.1	-0.308962	0.343266
ENSG00000269656.1	-1.47982	0.250223
ENSG00000269858.4	-0.00639902	0.173608
ENSG00000269893.5	-0.000566088	0.853793
ENSG00000269930.1	1.62034	0.339321
ENSG00000269982.1	-0.104389	0.200089
ENSG00000270074.1	1.49276	0.0668402
ENSG00000270402.1	0.807769	0.0826688
ENSG00000270433.1	-0.278874	0.809527
ENSG00000270510.1	0.261392	0.681002
ENSG00000270706.1	0.126703	0.846811
ENSG00000270765.4	-0.21631	0.177052
ENSG00000270882.2	-0.149883	0.388131
ENSG00000270885.1	0.00632489	0.160455
ENSG00000270947.1	0.241698	0.482625
ENSG00000271138.1	0.542449	0.703043
ENSG00000271553.1	0.146317	0.398103
ENSG00000271787.1	5.76717	0.00371989
ENSG00000271848.1	0.153566	0.74631
ENSG00000271913.4	0.30234	0.0473558
ENSG00000272006.1	0.883208	0.283645
ENSG00000272034.1	-0.204302	0.571717
ENSG00000272087.1	-0.0957757	0.36731
ENSG00000272112.1	0.230949	0.0197803
ENSG00000272148.1	0.422073	0.166384
ENSG00000272223.1	-0.637389	0.165936
ENSG00000272333.4	0.00834748	0.000603295
ENSG00000272379.1	-1.63251	0.495338
ENSG00000272391.4	-0.0011063	0.888898
ENSG00000272438.1	0.219093	0.291034
ENSG00000272645.2	-0.0339015	0.234434
ENSG00000272689.1	-1.11324	0.0771033
ENSG00000272724.1	0.978669	0.294592
ENSG00000272791.1	-0.00714602	0.969417
ENSG00000272798.1	-0.927722	0.597253
ENSG00000272821.1	0.012213	0.652616
ENSG00000272829.1	0.188005	0.0862723
ENSG00000273027.1	0.410449	0.0227247
ENSG00000273073.1	-0.0690724	0.925345
ENSG00000273226.1	0.0173243	0.900269
ENSG00000273265.1	-0.340446	0.385894
ENSG00000273311.1	0.0298472	0.760484
ENSG00000273350.1	-0.235494	0.291989
ENSG00000274295.1	-0.00881278	0.916125
ENSG00000274363.1	0.221245	0.671963
ENSG00000274736.3	-0.407655	0.320062
ENSG00000275301.1	0.0286749	0.669249
ENSG00000275793.1	0.347601	0.072339
ENSG00000276742.1	-0.220785	0.706713
ENSG00000276772.1	-0.98327	0.0978884
ENSG00000277358.1	1.88869	0.264235
ENSG00000277877.3	0.0184958	0.817225
ENSG00000277895.1	0.0117975	0.99272
ENSG00000278075.1	1.81511	0.000237351
ENSG00000278603.1	-0.206051	0.751989
ENSG00000278932.2	0.320851	0.578735
ENSG00000278978.1	0.0424265	0.013261
ENSG00000279117.1	0.00436206	0.220987
ENSG00000279208.1	-1.61795	0.294021
ENSG00000279332.1	-0.0478614	0.4133
ENSG00000279375.1	0.584294	0.0521796
ENSG00000279464.1	0.190406	0.613613
ENSG00000279774.1	-0.643392	0.333861
ENSG00000279792.1	0.0506759	0.889074
ENSG00000279810.1	0.104176	0.936264
ENSG00000280169.1	0.492449	0.698189
ENSG00000280212.1	-0.267304	0.65712
ENSG00000280213.1	0.094716	0.27262
ENSG00000280311.1	0.717031	0.589911
ENSG00000280328.1	-0.24733	0.196861
ENSG00000280560.1	-4.66313	0.0906685
ENSG00000281097.1	0.648947	0.0484763
ENSG00000281538.1	-0.0226434	0.94912
ENSG00000281691.1	-1.17327	0.180116

## Sheet: CG.DFI.COAD
Gene	Coefficient	Logrank p-value
ENSG00000002330.12	-0.0119731	0.494145
ENSG00000004487.14	-0.00848165	0.162802
ENSG00000004534.13	0.0226756	0.000630143
ENSG00000004777.17	0.0559221	0.0592702
ENSG00000004864.12	0.00585276	0.623465
ENSG00000004975.10	0.00937573	0.58226
ENSG00000005007.11	0.00558416	0.129357
ENSG00000005059.14	-0.0516148	0.0480991
ENSG00000006007.10	0.00147668	0.793778
ENSG00000006047.11	0.0201094	0.146179
ENSG00000006282.18	0.00595422	0.130791
ENSG00000006283.16	0.16729	0.583382
ENSG00000008056.11	0.0979129	0.275655
ENSG00000008083.12	0.0277786	0.118426
ENSG00000008118.8	-1.24943	0.154953
ENSG00000008256.14	-0.0120519	0.539867
ENSG00000008323.14	-0.00573697	0.387037
ENSG00000008438.4	-4.84198	0.0775479
ENSG00000008441.15	0.000660727	0.88967
ENSG00000009724.15	-0.260108	0.402743
ENSG00000010327.9	-0.0025995	0.650253
ENSG00000011009.9	0.000786163	0.896121
ENSG00000011143.15	0.0687306	0.128891
ENSG00000011304.15	-0.000850338	0.648758
ENSG00000012211.11	0.00177059	0.938677
ENSG00000013306.14	-0.00128079	0.467898
ENSG00000015532.8	0.00647288	0.653341
ENSG00000016402.11	-0.0171443	0.238734
ENSG00000016864.15	-0.0139858	0.487714
ENSG00000019102.10	-0.00121897	0.807165
ENSG00000019144.15	-0.00179417	0.833126
ENSG00000025708.11	-0.0027017	0.513888
ENSG00000029639.9	-0.00934262	0.745887
ENSG00000030582.15	0.00041422	0.384228
ENSG00000033100.13	0.00665668	0.350813
ENSG00000035681.6	-0.0233261	0.180751
ENSG00000035720.6	-0.488956	0.394168
ENSG00000037042.8	0.090656	0.028659
ENSG00000042062.10	-0.169057	0.211042
ENSG00000047579.18	0.0400336	0.0341088
ENSG00000047849.20	0.00105581	0.715566
ENSG00000048462.9	-0.221493	0.164829
ENSG00000050426.14	-0.00232482	0.821008
ENSG00000050820.15	0.00146914	0.676082
ENSG00000052344.14	0.00193793	0.037951
ENSG00000054983.15	0.00541844	0.483189
ENSG00000055211.11	-0.0166157	0.413844
ENSG00000059691.10	-0.0460682	0.16701
ENSG00000059915.15	0.0114799	0.38521
ENSG00000061273.16	0.00736332	0.369111
ENSG00000062282.13	-0.0075892	0.516178
ENSG00000062524.14	0.0379636	0.112478
ENSG00000064012.20	-0.0124599	0.428091
ENSG00000064309.13	0.0586101	0.17682
ENSG00000064601.15	-0.00150947	0.295716
ENSG00000064932.14	-0.00520636	0.2554
ENSG00000065320.7	0.0091868	0.738241
ENSG00000065923.8	-0.0118899	0.568039
ENSG00000067182.6	-0.00959738	0.0706773
ENSG00000067704.9	-0.000809613	0.858264
ENSG00000067829.17	0.00105707	0.540361
ENSG00000068137.13	0.0186329	0.449709
ENSG00000068305.16	-0.0300619	0.187248
ENSG00000068383.17	0.00655121	0.796418
ENSG00000068615.15	-0.0147127	0.545649
ENSG00000069424.13	0.00417741	0.660206
ENSG00000070047.10	0.0198862	0.0415339
ENSG00000070985.12	-0.00456937	0.960137
ENSG00000071282.10	-0.00747718	0.595883
ENSG00000072163.17	0.0114115	0.0802811
ENSG00000072518.19	0.00496971	0.509632
ENSG00000072736.17	-0.027037	0.309165
ENSG00000072778.18	0.00156499	0.337456
ENSG00000074276.9	-0.00107706	0.795059
ENSG00000075975.14	-0.0370891	0.209355
ENSG00000076067.10	-0.0255433	0.112238
ENSG00000076108.10	0.00516511	0.239246
ENSG00000076344.14	0.00822631	0.890901
ENSG00000076706.13	-0.000892728	0.806013
ENSG00000077092.17	-0.0334178	0.768349
ENSG00000077097.12	0.00569565	0.160976
ENSG00000077150.16	-0.00197377	0.809978
ENSG00000078061.11	-0.00175953	0.720504
ENSG00000078814.14	0.0275809	0.00161336
ENSG00000081181.6	-0.071037	0.296268
ENSG00000082014.15	-0.0287976	0.636456
ENSG00000083812.10	0.00544372	0.93272
ENSG00000084693.14	0.00876157	0.610964
ENSG00000084754.9	0.000945949	0.74122
ENSG00000086159.11	0.20651	0.227234
ENSG00000087087.17	0.0050083	0.273694
ENSG00000087191.11	0.00357183	0.409212
ENSG00000088038.16	0.0123415	0.195625
ENSG00000089050.13	-0.0149381	0.385408
ENSG00000089163.4	-0.848487	0.207614
ENSG00000089486.15	0.0362094	0.00314849
ENSG00000089820.14	0.00394836	0.22289
ENSG00000090097.19	0.02048	0.0421351
ENSG00000090975.11	-0.0318658	0.275819
ENSG00000091622.14	0.00158393	0.931148
ENSG00000092010.13	-0.00313175	0.129692
ENSG00000092051.15	0.264664	0.53198
ENSG00000092108.19	-0.0132715	0.316859
ENSG00000092758.14	0.00547906	9.45245e-05
ENSG00000092820.16	0.00104594	0.199602
ENSG00000093144.17	-0.0067251	0.454859
ENSG00000096063.13	-0.00194607	0.524272
ENSG00000096384.18	0.000563722	0.12572
ENSG00000099365.8	0.0622094	0.546323
ENSG00000099377.12	0.00100737	0.952599
ENSG00000099795.5	-0.00253478	0.361496
ENSG00000099797.10	-0.000493731	0.88
ENSG00000099800.6	-0.00326116	0.337375
ENSG00000099817.10	-0.00362757	0.285887
ENSG00000099821.12	0.00270395	0.56095
ENSG00000099822.2	0.147363	0.439184
ENSG00000099899.13	-0.00840057	0.583323
ENSG00000099904.14	-0.00170383	0.86247
ENSG00000099956.16	0.00348082	0.570179
ENSG00000099957.15	0.188481	0.505769
ENSG00000099958.13	-0.0266348	0.180458
ENSG00000099960.11	0.0382824	0.0647129
ENSG00000100078.3	-0.0817342	0.196997
ENSG00000100079.6	0.000285157	0.988087
ENSG00000100139.12	-0.00517192	0.754628
ENSG00000100196.9	-0.0180873	0.0734392
ENSG00000100201.17	0.000563026	0.762054
ENSG00000100220.10	-0.00262764	0.586431
ENSG00000100239.14	0.00547967	0.57179
ENSG00000100241.19	0.0021354	0.516839
ENSG00000100276.9	0.2203	0.540024
ENSG00000100359.19	0.00291227	0.648286
ENSG00000100417.10	-0.00646388	0.609884
ENSG00000100433.14	0.0176541	0.816982
ENSG00000100522.7	-0.0114196	0.14906
ENSG00000100767.14	-0.00635328	0.864476
ENSG00000100908.12	-0.0240039	0.363424
ENSG00000100918.11	-0.00366031	0.93364
ENSG00000100979.13	-0.00237858	0.372809
ENSG00000100982.10	0.00727742	0.236271
ENSG00000100991.10	0.00505255	0.0604163
ENSG00000101003.9	-0.0128915	0.318382
ENSG00000101004.13	0.0298017	0.0054034
ENSG00000101082.12	-0.225474	0.193243
ENSG00000101084.15	0.00152433	0.747822
ENSG00000101158.11	0.00268975	0.241
ENSG00000101160.12	0.000208886	0.884271
ENSG00000101190.11	0.0041098	0.795972
ENSG00000101220.16	-0.00356034	0.504876
ENSG00000101298.12	-0.00647636	0.72934
ENSG00000101343.13	4.07932e-05	0.996693
ENSG00000101384.10	-0.0057337	0.184444
ENSG00000101460.11	0.0106595	0.232723
ENSG00000101464.9	0.00564524	0.368001
ENSG00000101882.8	0.0414133	0.00822653
ENSG00000102007.9	-2.73739e-06	0.998601
ENSG00000102109.8	0.0133257	0.0333385
ENSG00000102144.12	0.000151779	0.808818
ENSG00000102302.7	-0.0114986	0.551026
ENSG00000102362.14	-0.0255551	0.315941
ENSG00000102710.18	0.00716893	0.239445
ENSG00000102854.13	-0.0049673	0.169897
ENSG00000102978.11	-0.000214531	0.973312
ENSG00000102984.13	0.44258	0.0447868
ENSG00000103024.6	-0.00955503	0.326273
ENSG00000103044.9	-0.0215232	0.18487
ENSG00000103067.10	0.0107666	0.11181
ENSG00000103111.13	0.0126045	0.201777
ENSG00000103126.13	0.00402869	0.367009
ENSG00000103264.14	0.0179841	0.0726483
ENSG00000103351.11	0.0139269	0.586077
ENSG00000103415.10	-0.00603107	0.44659
ENSG00000103426.11	-0.0120965	0.9965
ENSG00000103479.13	-0.00139675	0.89506
ENSG00000103510.18	0.0243542	0.0845151
ENSG00000104341.15	0.000767954	0.60692
ENSG00000104524.12	-0.0119166	0.260128
ENSG00000104660.16	-0.0151929	0.164688
ENSG00000104679.9	0.00672827	0.687243
ENSG00000104859.13	0.0121363	0.337639
ENSG00000104903.4	-0.168704	0.204869
ENSG00000104936.16	0.0171462	0.119287
ENSG00000104964.13	-0.00032851	0.809385
ENSG00000105135.14	-0.00305238	0.329865
ENSG00000105137.11	-0.00439236	0.853228
ENSG00000105258.7	-0.00577874	0.43759
ENSG00000105261.6	-3.6509	0.202879
ENSG00000105325.12	0.00325229	0.587597
ENSG00000105355.7	-0.00184044	0.682645
ENSG00000105364.12	-0.00336644	0.442437
ENSG00000105373.17	0.000132323	0.907314
ENSG00000105556.9	0.00142469	0.953812
ENSG00000105617.3	0.051575	0.356661
ENSG00000105655.17	0.00497426	0.608015
ENSG00000105656.11	0.00590332	0.826016
ENSG00000105662.14	0.0147525	0.471435
ENSG00000105664.9	7.52432e-05	0.975744
ENSG00000105701.14	0.00041098	0.773179
ENSG00000105708.8	-0.0653672	0.319875
ENSG00000105856.12	-0.0198056	0.157849
ENSG00000105877.16	-0.433564	0.355768
ENSG00000105996.6	0.182347	0.000222178
ENSG00000106077.17	-0.00135245	0.719615
ENSG00000106123.10	0.0358189	0.300222
ENSG00000106346.10	-0.05328	0.176377
ENSG00000106367.12	-0.0030183	0.374303
ENSG00000106484.13	0.010373	0.105244
ENSG00000106624.7	-9.84074e-05	0.882909
ENSG00000106628.9	-0.000735652	0.75613
ENSG00000106948.15	-0.0197406	0.125321
ENSG00000106991.12	-0.000949459	0.791209
ENSG00000107159.11	-0.000632578	0.796751
ENSG00000107201.8	-0.00252549	0.899076
ENSG00000107404.16	-0.00186706	0.646196
ENSG00000107581.11	0.00206384	0.32328
ENSG00000107672.13	-0.00164875	0.888268
ENSG00000107736.18	0.113212	0.253514
ENSG00000107829.12	0.00783921	0.436056
ENSG00000107872.11	-0.00858309	0.535886
ENSG00000107874.9	-0.000474519	0.974253
ENSG00000107902.12	0.000612641	0.973457
ENSG00000108262.14	-0.000796322	0.863074
ENSG00000108309.11	0.188348	0.0449858
ENSG00000108556.7	-0.325627	0.50328
ENSG00000108591.8	-0.00501791	0.804864
ENSG00000108592.15	0.0106185	0.206513
ENSG00000108602.16	0.0142809	0.0943639
ENSG00000108604.14	0.00302184	0.44466
ENSG00000108788.10	-0.0139302	0.133915
ENSG00000108797.10	0.0179677	0.273899
ENSG00000108799.11	0.028592	0.245498
ENSG00000108840.14	0.00784231	0.293122
ENSG00000108846.14	0.002404	0.291467
ENSG00000108854.14	-0.0251825	0.245415
ENSG00000108924.12	0.0076267	0.900589
ENSG00000108963.16	0.0108939	0.608481
ENSG00000109519.11	-0.0105899	0.376441
ENSG00000109686.15	-0.00448004	0.281856
ENSG00000109956.11	-0.776659	0.249395
ENSG00000110042.6	0.00822308	0.273352
ENSG00000110395.4	-0.00148737	0.902428
ENSG00000110697.11	0.000900494	0.86423
ENSG00000110700.5	-0.000971615	0.275241
ENSG00000110711.8	0.000689235	0.888799
ENSG00000110925.5	0.00189989	0.939305
ENSG00000111077.16	0.0066024	0.464692
ENSG00000111087.8	0.0118144	0.844684
ENSG00000111276.9	0.000517975	0.923806
ENSG00000111344.10	0.0157671	0.231311
ENSG00000111445.12	-0.0158067	0.47122
ENSG00000111669.13	-0.000718634	0.284471
ENSG00000111671.8	-0.0241543	0.536554
ENSG00000112137.15	-0.0295156	0.662569
ENSG00000112511.16	0.0376643	0.0376109
ENSG00000112514.14	-0.00107796	0.775166
ENSG00000113716.11	0.00923665	0.451604
ENSG00000113758.12	0.00456496	0.204765
ENSG00000113763.9	0.222083	0.0306365
ENSG00000114354.11	-0.00730197	0.271527
ENSG00000115053.14	0.00101907	0.0790944
ENSG00000115155.15	0.0789824	0.0080846
ENSG00000115232.12	-0.0759973	0.075386
ENSG00000115275.10	0.00876771	0.286493
ENSG00000115297.10	0.980984	1.15439e-05
ENSG00000115310.16	-0.00425175	0.150253
ENSG00000115325.12	0.00598524	0.789761
ENSG00000115657.11	0.0910371	0.00732087
ENSG00000115841.18	-0.0547275	0.454413
ENSG00000116005.10	-8.32655e-05	0.991791
ENSG00000116161.16	-0.0027933	0.633989
ENSG00000116176.6	-0.0292373	0.353729
ENSG00000116221.14	-0.00574432	0.242743
ENSG00000116254.16	0.173425	0.145062
ENSG00000116329.9	0.0667233	0.111842
ENSG00000116478.10	0.00156799	0.565344
ENSG00000116957.11	-0.0367803	0.116205
ENSG00000117308.13	-0.00172041	0.64693
ENSG00000117411.15	-0.00610751	0.479714
ENSG00000117419.13	-0.0126959	0.236424
ENSG00000118094.10	0.128367	0.0877992
ENSG00000118518.14	0.0224127	0.515547
ENSG00000118873.14	-0.00541309	0.692197
ENSG00000118997.12	-0.314825	0.202745
ENSG00000119041.9	-0.00152556	0.916594
ENSG00000119396.9	-0.0064534	0.335308
ENSG00000119397.15	0.0274489	0.16239
ENSG00000119408.15	-0.00808798	0.289116
ENSG00000119522.14	-0.00561473	0.680431
ENSG00000119689.13	-0.0051164	0.287116
ENSG00000119698.10	-0.243682	0.727658
ENSG00000119915.4	0.107868	0.747875
ENSG00000119986.6	-0.00320771	0.821176
ENSG00000120333.4	-0.0330418	0.23003
ENSG00000120699.11	0.00750958	0.434519
ENSG00000120784.14	-0.0145588	0.703877
ENSG00000120860.9	0.0368208	0.0687727
ENSG00000120948.14	0.0106188	0.172362
ENSG00000121053.5	-3.68473	0.102208
ENSG00000121075.8	0.0218793	0.0136791
ENSG00000121653.10	0.131292	5.24643e-06
ENSG00000122033.13	0.0145081	0.0202238
ENSG00000122034.11	0.00118877	0.329865
ENSG00000122203.13	-0.0113701	0.183362
ENSG00000122674.10	-0.0356374	0.538938
ENSG00000122696.11	-0.329492	0.00418548
ENSG00000122729.17	-0.00152493	0.84203
ENSG00000122735.14	-2.83717	0.47532
ENSG00000122971.7	-0.00260793	0.665547
ENSG00000123136.13	-0.00435751	0.237939
ENSG00000123143.11	0.00172094	0.617838
ENSG00000123146.18	0.00173018	0.419021
ENSG00000123329.16	-0.0758402	0.146008
ENSG00000123342.14	-0.0203958	0.484978
ENSG00000123395.13	0.0085103	0.369231
ENSG00000123485.10	-0.00559845	0.76748
ENSG00000123737.11	-0.00780171	0.740397
ENSG00000123870.10	0.0506439	0.75502
ENSG00000124151.17	0.00159059	0.804421
ENSG00000124541.6	-0.0123242	0.513092
ENSG00000124574.13	0.0145609	0.00512918
ENSG00000124587.12	-0.00338117	0.685487
ENSG00000124593.13	0.120375	0.0660084
ENSG00000124713.5	0.673738	0.24283
ENSG00000124915.9	-0.297898	0.57805
ENSG00000124939.5	0.0810124	0.576147
ENSG00000125037.11	-0.019014	0.173413
ENSG00000125148.6	-0.00622262	0.185066
ENSG00000125149.10	-0.0333088	0.43902
ENSG00000125170.9	0.00108157	0.757096
ENSG00000125257.12	0.00179838	0.88396
ENSG00000125355.14	-0.517583	0.206439
ENSG00000125520.12	0.00281714	0.521793
ENSG00000125650.4	-0.139895	0.356796
ENSG00000125652.6	-0.00844474	0.130235
ENSG00000125741.4	-0.00343622	0.89519
ENSG00000125753.12	-0.00141825	0.63181
ENSG00000125775.13	0.00357904	0.349969
ENSG00000126010.5	-0.00685441	0.956845
ENSG00000126246.8	-0.323858	0.298745
ENSG00000126247.9	-0.00111968	0.296583
ENSG00000126464.12	0.00829127	0.388328
ENSG00000126500.3	-0.00549272	0.972493
ENSG00000126603.7	0.00912036	0.543752
ENSG00000126778.8	0.216971	0.00450114
ENSG00000126895.12	0.206157	0.305008
ENSG00000127311.8	-0.0916755	0.163029
ENSG00000127533.3	-0.05462	0.47475
ENSG00000127564.15	-0.00749061	0.437329
ENSG00000127585.10	-0.00737998	0.775335
ENSG00000127948.12	0.0011035	0.537132
ENSG00000128016.5	0.000270636	0.832807
ENSG00000128191.12	0.0261705	0.116667
ENSG00000128283.6	-0.0023949	0.37243
ENSG00000128322.6	-0.870046	0.44006
ENSG00000128346.9	0.71559	0.0359155
ENSG00000128463.11	-0.0128966	0.175495
ENSG00000128482.14	0.156475	0.353111
ENSG00000128563.12	0.061401	0.0100296
ENSG00000128564.6	0.00839127	0.760161
ENSG00000128595.15	-0.00440294	0.180572
ENSG00000128617.2	-0.0229911	0.920576
ENSG00000128709.11	0.018093	0.0963562
ENSG00000129103.16	-0.000495439	0.880834
ENSG00000129195.14	-0.0433423	0.179962
ENSG00000129347.18	0.0155642	0.262499
ENSG00000129451.10	0.0014986	0.356789
ENSG00000129691.14	-0.0229878	0.100508
ENSG00000129910.6	-0.409866	0.545825
ENSG00000129951.17	0.060119	0.923641
ENSG00000129968.14	-0.00116323	0.900021
ENSG00000130244.11	-0.0334401	0.174375
ENSG00000130487.5	-0.194294	0.304426
ENSG00000130511.14	-0.00174532	0.794735
ENSG00000130545.14	-0.0103918	0.328303
ENSG00000130584.9	0.0179253	0.776873
ENSG00000130702.12	0.00395719	0.0018399
ENSG00000130706.11	0.00123613	0.441129
ENSG00000130714.14	-0.00215643	0.887122
ENSG00000130717.11	-0.0015483	0.931441
ENSG00000130734.8	-0.00163807	0.889292
ENSG00000130748.6	-0.0108316	0.386975
ENSG00000130751.8	-0.18065	0.6179
ENSG00000130758.6	0.00563665	0.816897
ENSG00000130811.9	-0.000395637	0.868341
ENSG00000130812.9	0.675947	0.276243
ENSG00000130813.16	0.00997009	0.671116
ENSG00000130826.14	0.00565753	0.0235037
ENSG00000130827.6	0.00799696	0.0694568
ENSG00000130830.13	0.0139795	0.0363381
ENSG00000130876.10	0.434021	0.10793
ENSG00000130881.12	0.00253846	0.655251
ENSG00000131149.16	0.00781723	0.031206
ENSG00000131153.7	-0.00154477	0.877496
ENSG00000131188.10	-0.0254665	0.239215
ENSG00000131236.15	-0.00238387	0.187876
ENSG00000131238.15	-0.00853543	0.112279
ENSG00000131389.15	0.0018507	0.285012
ENSG00000131470.13	0.0391808	0.683357
ENSG00000131584.17	0.00560678	0.44903
ENSG00000131650.12	0.0147746	0.842037
ENSG00000131788.14	0.00180349	0.9468
ENSG00000131899.9	-0.0055887	0.658435
ENSG00000132153.13	0.000795188	0.862492
ENSG00000132155.10	-0.00592651	0.648662
ENSG00000132313.13	-0.00233871	0.841802
ENSG00000132388.11	-0.0270362	0.0922019
ENSG00000132507.16	-0.000500964	0.511284
ENSG00000132613.13	0.0181385	0.522071
ENSG00000132622.9	-0.00124855	0.97948
ENSG00000132793.10	0.0144232	0.00435019
ENSG00000133019.10	0.00450068	0.738339
ENSG00000133055.7	-7.22225	0.078471
ENSG00000133318.12	-0.000315292	0.940166
ENSG00000133794.16	-0.0225025	0.714519
ENSG00000133805.14	-0.0428629	0.250666
ENSG00000133961.18	-0.00581112	0.555639
ENSG00000134013.14	-0.000223526	0.95133
ENSG00000134317.16	-0.0344265	0.430769
ENSG00000134318.12	-0.000222844	0.951899
ENSG00000134398.11	0.00346251	0.354436
ENSG00000134480.12	-0.0121825	0.579892
ENSG00000134668.11	-0.011179	0.858723
ENSG00000134684.9	-0.00185516	0.692073
ENSG00000134697.11	0.0170825	0.150954
ENSG00000134769.20	0.0304677	0.293608
ENSG00000134780.8	0.0128437	0.349768
ENSG00000135093.11	-0.0217958	0.586547
ENSG00000135144.6	0.0978238	0.101379
ENSG00000135365.14	0.0218957	0.257169
ENSG00000135414.8	0.0135694	0.593577
ENSG00000135451.11	-0.00161739	0.919913
ENSG00000135597.17	0.00174878	0.92626
ENSG00000135678.10	-0.0145877	0.411348
ENSG00000135749.17	0.00787355	0.765377
ENSG00000135778.10	-0.02223	0.173151
ENSG00000135945.8	0.0139831	0.550565
ENSG00000136048.12	-0.0115518	0.417016
ENSG00000136059.13	-0.00337533	0.441974
ENSG00000136478.6	-0.0038202	0.805512
ENSG00000136854.16	0.00119673	0.865406
ENSG00000136877.13	-0.00227628	0.649273
ENSG00000136881.10	-0.0246796	0.549767
ENSG00000136930.11	-0.00111082	0.784531
ENSG00000137070.16	0.108885	0.049297
ENSG00000137154.11	-0.000199879	0.165298
ENSG00000137200.11	0.0263087	0.0381497
ENSG00000137267.5	0.0183039	0.381641
ENSG00000137274.11	0.01468	0.605663
ENSG00000137563.10	-0.00211976	0.294525
ENSG00000137575.10	-0.00201007	0.456943
ENSG00000137825.9	0.0019054	0.902544
ENSG00000137841.10	-0.0175493	0.583974
ENSG00000137843.10	-0.526521	0.539869
ENSG00000137877.9	0.0489401	0.00107533
ENSG00000138061.10	-0.0187684	0.461298
ENSG00000138073.12	-0.00015673	0.981602
ENSG00000138100.12	0.0213847	0.145552
ENSG00000138193.13	-0.0206367	0.213398
ENSG00000138794.8	-0.0163184	0.124246
ENSG00000138834.11	0.00717935	0.163191
ENSG00000139044.9	0.00358548	0.437609
ENSG00000139540.10	0.00457015	0.110728
ENSG00000139645.9	-0.00259585	0.697523
ENSG00000139835.12	0.0221606	0.0187266
ENSG00000140093.8	0.0698132	0.139702
ENSG00000140104.12	-0.00601073	0.875353
ENSG00000140199.10	-0.0146472	0.542778
ENSG00000140854.11	0.00809662	0.376417
ENSG00000140859.14	0.00644564	0.569617
ENSG00000140876.10	0.203951	0.138623
ENSG00000140931.18	-0.0157321	0.398356
ENSG00000140939.13	0.026981	0.193265
ENSG00000140990.13	-0.0052325	0.256178
ENSG00000141068.12	0.0486346	0.0246787
ENSG00000141179.12	0.00929678	0.477005
ENSG00000141219.14	8.57312e-06	0.999804
ENSG00000141349.7	0.000992899	0.865153
ENSG00000141401.10	-0.0120602	0.10442
ENSG00000141447.15	-0.0395411	0.0673135
ENSG00000141503.14	0.00210231	0.48637
ENSG00000141522.10	0.000798062	0.612793
ENSG00000141564.12	0.0126788	0.132543
ENSG00000141744.3	0.186853	0.669727
ENSG00000141934.8	0.00100029	0.596012
ENSG00000142186.15	0.00180659	0.774345
ENSG00000142197.11	-0.00397631	0.647305
ENSG00000142208.14	0.00028678	0.936507
ENSG00000142632.15	0.0240349	0.0164495
ENSG00000143157.10	-0.00438842	0.676789
ENSG00000143198.11	-0.00748754	0.202017
ENSG00000143318.11	0.291498	0.607403
ENSG00000143340.6	-0.0152553	0.975527
ENSG00000143382.12	0.00651792	0.755025
ENSG00000143442.20	0.00805032	0.395361
ENSG00000143494.14	0.0294566	0.650089
ENSG00000143552.8	-0.905438	0.412259
ENSG00000143553.9	-0.0481468	0.0791671
ENSG00000143621.15	-0.000921101	0.731692
ENSG00000143748.16	0.00859869	0.802703
ENSG00000143819.11	0.00164886	0.795792
ENSG00000143845.13	0.101198	0.0555928
ENSG00000143862.6	0.0115403	0.415952
ENSG00000143952.18	0.0094287	0.530557
ENSG00000143977.12	-0.0042545	0.539626
ENSG00000143994.12	-0.0474714	0.896179
ENSG00000144045.12	0.0248974	0.259903
ENSG00000144395.16	0.101276	0.212405
ENSG00000144596.10	-0.00129882	0.980456
ENSG00000144597.12	0.0123743	0.537276
ENSG00000144746.6	-0.00512594	0.324394
ENSG00000144857.13	0.0198702	0.282156
ENSG00000145002.11	-1.741	0.241072
ENSG00000145244.10	0.05321	0.396043
ENSG00000145246.12	-0.0254695	0.339267
ENSG00000145386.8	-0.0167317	0.069681
ENSG00000145416.12	-0.140309	0.0584097
ENSG00000145715.13	0.00705878	0.587304
ENSG00000145721.10	-0.436569	0.669259
ENSG00000145901.13	0.00202721	0.575548
ENSG00000146223.13	0.00222737	0.660738
ENSG00000146426.16	0.0473054	0.348571
ENSG00000146477.5	0.027771	0.0651865
ENSG00000146556.13	0.288676	0.0116337
ENSG00000146830.9	0.0109356	0.0558587
ENSG00000147119.3	0.00899062	0.927694
ENSG00000147465.10	-2.10942	0.389468
ENSG00000147573.15	-0.130849	0.962717
ENSG00000147912.11	0.0137169	0.903424
ENSG00000148082.8	-0.0316858	0.477436
ENSG00000148204.10	0.0313173	0.33332
ENSG00000148337.18	-0.00157797	0.737685
ENSG00000148358.18	-0.00699644	0.355329
ENSG00000148362.9	-0.00451365	0.669706
ENSG00000148600.13	-0.00230229	0.389507
ENSG00000148702.13	0.0111908	0.61199
ENSG00000148824.17	0.0701875	0.126472
ENSG00000148925.9	0.0167694	0.440633
ENSG00000149179.12	0.0230083	0.0271327
ENSG00000149182.13	0.0216866	1.78277e-05
ENSG00000149243.14	0.0219454	0.0338463
ENSG00000149273.13	-0.000223966	0.193715
ENSG00000149328.13	-0.00705903	0.302223
ENSG00000149346.13	-0.010273	0.655716
ENSG00000149489.7	-0.0998244	0.661386
ENSG00000149541.8	0.00317468	0.772829
ENSG00000149782.10	0.00143697	0.631954
ENSG00000149922.9	0.0816473	0.258185
ENSG00000149923.12	-0.000498241	0.810433
ENSG00000149929.14	0.0394975	0.0474508
ENSG00000149930.16	0.0211737	0.0223618
ENSG00000149968.10	-0.0105478	0.0868684
ENSG00000149970.13	0.033582	0.923147
ENSG00000150281.6	0.199708	0.00158004
ENSG00000151117.7	-0.133807	0.169987
ENSG00000151303.11	1.7457	0.555465
ENSG00000151364.14	0.0122611	0.482142
ENSG00000151365.2	0.0581874	0.776026
ENSG00000151366.11	0.00460443	0.713577
ENSG00000152382.5	-0.0657446	0.0930058
ENSG00000153162.8	-0.0299656	0.785204
ENSG00000153944.9	-0.00258926	0.622346
ENSG00000154040.19	-0.123158	0.736875
ENSG00000154146.11	-0.0244925	0.675931
ENSG00000154175.15	-0.0194059	0.561827
ENSG00000154222.13	0.0291626	0.109168
ENSG00000154639.17	-0.00398206	0.346968
ENSG00000154640.13	-0.0420727	0.0504083
ENSG00000154864.10	0.00550416	0.909455
ENSG00000154945.6	-0.0177903	0.437932
ENSG00000155026.15	2.78303	0.314902
ENSG00000155252.13	0.00870252	0.7457
ENSG00000155363.17	0.00904695	0.304927
ENSG00000155366.15	-0.00137918	0.548044
ENSG00000155506.15	0.00393789	0.172119
ENSG00000155749.11	-0.435166	0.589273
ENSG00000155850.7	-0.00276734	0.207616
ENSG00000155974.10	0.160277	0.0460589
ENSG00000156096.11	-0.137553	0.640275
ENSG00000156381.7	-0.00612897	0.463539
ENSG00000156642.15	-0.0154822	0.0542923
ENSG00000157017.14	-2.24332	0.0586512
ENSG00000157020.16	-0.00157937	0.620127
ENSG00000157077.13	-0.0018042	0.95037
ENSG00000157111.11	0.0011999	0.945423
ENSG00000157216.14	0.0175664	0.0183407
ENSG00000157368.9	0.0201278	0.675368
ENSG00000157593.15	-0.000827667	0.890773
ENSG00000157833.11	0.164959	0.000597066
ENSG00000157851.15	-0.0481835	0.895429
ENSG00000157856.9	0.412991	0.409743
ENSG00000158008.8	0.547245	0.421243
ENSG00000158014.13	-0.0598304	0.261971
ENSG00000158158.10	-0.00468062	0.482872
ENSG00000158417.9	0.00727422	0.0222973
ENSG00000158483.14	-0.0216717	0.801811
ENSG00000158526.7	0.0132712	0.0476878
ENSG00000158552.11	0.00741501	0.643127
ENSG00000158578.17	0.630752	0.0193564
ENSG00000158623.13	0.0089505	0.445436
ENSG00000158792.14	-0.00112917	0.950235
ENSG00000158828.5	-0.00779969	0.713592
ENSG00000159023.17	-0.00447124	0.554219
ENSG00000159184.7	-0.0113888	0.301782
ENSG00000159247.11	0.0397845	0.670726
ENSG00000159263.14	-0.00162421	0.936683
ENSG00000159267.13	-0.0164698	0.497455
ENSG00000159374.16	-0.0154482	0.902484
ENSG00000159377.9	-0.00204636	0.357169
ENSG00000159792.8	0.00174875	0.879447
ENSG00000159842.13	0.00365106	0.140098
ENSG00000160050.13	0.0325067	0.723143
ENSG00000160111.11	-0.136598	0.580131
ENSG00000160172.9	-0.0323061	0.733772
ENSG00000160214.11	-0.00403362	0.694902
ENSG00000160325.13	0.0102293	0.119276
ENSG00000160326.12	0.0477663	0.204015
ENSG00000160404.16	-0.0100532	0.562741
ENSG00000160469.15	0.0550606	0.286503
ENSG00000160781.14	0.0575592	0.395196
ENSG00000160818.15	0.0176916	0.115946
ENSG00000160883.9	0.0125225	0.475734
ENSG00000160951.3	0.154765	0.286492
ENSG00000161082.11	-0.137453	0.378004
ENSG00000161091.11	-0.00351994	0.524933
ENSG00000161281.9	-0.0370726	0.510156
ENSG00000161395.11	0.00283785	0.00130748
ENSG00000161682.13	-0.0633237	0.756642
ENSG00000161800.11	-0.00734904	0.367995
ENSG00000162006.8	-2.82046	0.0837891
ENSG00000162066.13	-0.00470625	0.812076
ENSG00000162078.10	-0.000407943	0.948234
ENSG00000162241.11	0.0786151	0.162127
ENSG00000162434.10	-0.000919508	0.808027
ENSG00000162437.13	-0.000955239	0.940664
ENSG00000162522.9	-0.000989125	0.729297
ENSG00000162572.18	0.0658163	0.447802
ENSG00000162621.6	-0.411694	0.796396
ENSG00000162728.4	-0.22681	0.759296
ENSG00000162729.12	0.00234743	0.396397
ENSG00000162885.11	-0.106337	0.0412451
ENSG00000162892.14	-0.29402	0.0337721
ENSG00000162894.10	-0.0824934	0.306597
ENSG00000162976.11	-0.0412972	0.117315
ENSG00000163154.5	-0.176998	0.218913
ENSG00000163155.10	-0.0829303	0.35154
ENSG00000163156.10	-0.0107846	0.656723
ENSG00000163159.10	-0.00291231	0.822641
ENSG00000163249.8	-0.0421134	0.150086
ENSG00000163251.3	-0.00641269	0.349069
ENSG00000163380.14	1.2601	0.00041698
ENSG00000163382.10	-0.00411198	0.311728
ENSG00000163485.14	-0.193732	0.214241
ENSG00000163499.10	0.38808	0.00433883
ENSG00000163697.15	0.00607653	0.46172
ENSG00000163703.16	0.0297618	0.0168868
ENSG00000163704.10	-0.333457	0.14617
ENSG00000163794.6	0.305626	0.231932
ENSG00000163806.14	-0.0705592	0.642705
ENSG00000163879.10	0.0453255	0.143526
ENSG00000163938.15	0.00363911	0.393825
ENSG00000164054.14	-0.000892098	0.621016
ENSG00000164062.11	-0.00145232	0.561092
ENSG00000164070.10	0.000279081	0.984975
ENSG00000164099.3	0.0208001	0.242207
ENSG00000164296.6	-0.183705	0.22764
ENSG00000164597.12	-0.0167948	0.208389
ENSG00000164649.18	0.0015326	0.909646
ENSG00000164663.12	0.0113553	0.854569
ENSG00000164674.14	-0.130221	0.36078
ENSG00000164742.13	0.00823828	0.874105
ENSG00000164776.8	0.0278103	0.853337
ENSG00000164808.15	-0.00965919	0.5211
ENSG00000164855.14	0.0147255	0.0209267
ENSG00000164889.11	0.00258828	0.478423
ENSG00000164896.18	0.00282612	0.564202
ENSG00000164902.12	0.0197711	0.412939
ENSG00000164932.11	-0.00448392	0.497396
ENSG00000165125.16	-0.0962284	0.359865
ENSG00000165458.12	0.00944475	0.128489
ENSG00000165462.5	1.29198	0.413373
ENSG00000165905.15	0.0101526	0.000153705
ENSG00000165983.13	-0.0290836	0.241408
ENSG00000165985.9	-0.886725	0.0290056
ENSG00000166004.13	0.00417616	0.85295
ENSG00000166171.11	-0.0256855	0.293794
ENSG00000166311.8	0.0160598	0.169672
ENSG00000166313.17	0.0295421	0.282071
ENSG00000166428.11	-0.146273	0.390837
ENSG00000166507.15	0.0784923	0.788219
ENSG00000166575.15	-0.0122915	0.618939
ENSG00000166763.7	0.64931	0.300418
ENSG00000166816.12	-0.00538095	0.764409
ENSG00000166851.13	-0.00132969	0.78908
ENSG00000166856.2	-0.922783	0.463332
ENSG00000166860.2	0.0350868	0.433395
ENSG00000166960.15	-0.752711	0.69858
ENSG00000166971.15	0.034442	0.44688
ENSG00000167094.14	0.000231554	0.999309
ENSG00000167105.6	-0.0185135	0.450004
ENSG00000167106.10	0.00333758	0.498309
ENSG00000167118.9	-0.00227101	0.693595
ENSG00000167220.10	-0.0413879	0.328495
ENSG00000167280.15	0.00562916	0.031986
ENSG00000167281.17	0.0225936	0.795193
ENSG00000167311.12	-0.0419309	0.930815
ENSG00000167460.13	-0.000624668	0.534641
ENSG00000167468.15	-0.00350122	0.13388
ENSG00000167513.7	-0.00354219	0.530393
ENSG00000167535.6	0.0035481	0.860188
ENSG00000167543.14	-0.000405079	0.964361
ENSG00000167549.17	0.240786	0.312437
ENSG00000167644.10	-0.00259241	0.614138
ENSG00000167645.15	-0.00873858	0.359802
ENSG00000167670.14	-0.0014688	0.902629
ENSG00000167671.10	-0.000154843	0.970333
ENSG00000167748.9	-0.000530406	0.883295
ENSG00000167771.5	0.0142412	0.699569
ENSG00000167778.7	0.000133594	0.986749
ENSG00000167863.10	-0.00135134	0.744627
ENSG00000167889.11	0.270454	0.0671587
ENSG00000167930.14	0.00220786	0.547952
ENSG00000167967.14	0.00188695	0.82893
ENSG00000167968.11	0.0251555	0.859883
ENSG00000167969.11	-0.00540266	0.353276
ENSG00000167984.15	-0.140191	0.166227
ENSG00000168056.13	0.00534829	0.124672
ENSG00000168060.13	0.0803283	0.00105994
ENSG00000168061.12	-0.0121771	0.446465
ENSG00000168234.11	-0.158566	0.0101209
ENSG00000168256.16	-0.00188014	0.89574
ENSG00000168268.9	-0.00506675	0.288653
ENSG00000168350.7	-0.00286417	0.624977
ENSG00000168427.8	-0.0573047	0.82438
ENSG00000168477.16	0.00905616	0.470616
ENSG00000168743.11	-0.00373263	0.51627
ENSG00000168802.11	-0.00662989	0.319947
ENSG00000168827.13	-0.00453582	0.678913
ENSG00000168913.6	0.497122	0.257475
ENSG00000168995.12	-0.240964	0.284665
ENSG00000169188.4	-0.000477788	0.961637
ENSG00000169258.6	0.0571374	0.197917
ENSG00000169372.11	-0.120108	0.19123
ENSG00000169583.12	-0.0481579	0.205462
ENSG00000169641.12	-0.0171594	0.091773
ENSG00000169692.11	0.00071983	0.671748
ENSG00000169718.16	0.00147004	0.52759
ENSG00000169727.11	0.00122476	0.675487
ENSG00000169764.13	-0.00228938	0.682031
ENSG00000169885.8	0.181651	0.804117
ENSG00000169962.4	0.0567059	0.0641462
ENSG00000169972.10	-0.0274157	0.23494
ENSG00000169994.17	0.00478221	0.0622384
ENSG00000170035.14	-0.0036397	0.813741
ENSG00000170049.8	-0.231538	0.50604
ENSG00000170075.8	0.0197628	0.867984
ENSG00000170085.16	0.00395866	0.916714
ENSG00000170142.10	-0.0170292	0.096936
ENSG00000170271.9	0.0140733	0.369855
ENSG00000170291.13	-0.012457	0.47381
ENSG00000170382.10	0.00352302	0.955758
ENSG00000170423.11	-0.0675932	0.846713
ENSG00000170473.15	-0.0178117	0.269221
ENSG00000170684.7	-0.0560512	0.310496
ENSG00000170776.18	-0.00292973	0.480092
ENSG00000170779.10	-0.0246591	0.156725
ENSG00000171103.9	0.0140724	0.785839
ENSG00000171262.10	0.01126	0.435697
ENSG00000171462.13	-0.0296191	0.844754
ENSG00000171603.15	-0.00106477	0.566543
ENSG00000171608.14	-0.0248523	0.449654
ENSG00000171777.14	-0.281908	0.251755
ENSG00000171817.15	-0.187637	0.649704
ENSG00000171840.10	0.0361523	0.604263
ENSG00000171889.3	-0.170413	0.787395
ENSG00000172059.9	0.0055282	0.837614
ENSG00000172247.3	0.748637	0.0453454
ENSG00000172346.13	0.0714784	0.441849
ENSG00000172354.8	-0.000267921	0.80751
ENSG00000172367.14	0.0228083	0.420585
ENSG00000172460.13	0.073943	0.232613
ENSG00000172476.3	0.21261	0.452235
ENSG00000172500.11	-0.010304	0.23256
ENSG00000172531.13	-0.00146578	0.491818
ENSG00000172543.6	-0.0608747	0.423903
ENSG00000172575.10	-0.162287	0.112398
ENSG00000172613.6	0.0249525	0.350176
ENSG00000172640.3	0.746765	0.756942
ENSG00000172650.11	1.05623	0.189592
ENSG00000172725.12	0.000893085	0.54066
ENSG00000172889.14	-0.000430181	0.976977
ENSG00000172935.8	0.00288845	0.865463
ENSG00000173011.11	-0.0228618	0.384332
ENSG00000173137.10	0.0124829	0.201598
ENSG00000173145.10	-0.0255388	0.261563
ENSG00000173338.11	-0.066188	0.785136
ENSG00000173418.10	-0.00946656	0.193675
ENSG00000173442.10	0.000380454	0.946552
ENSG00000173482.15	-0.00726115	0.687083
ENSG00000173846.11	0.00609621	0.780487
ENSG00000173947.12	0.02049	0.814225
ENSG00000174243.8	0.00670032	0.210103
ENSG00000174292.11	0.00725472	0.771207
ENSG00000174521.7	-1.23711	0.114135
ENSG00000174606.11	-0.0187163	0.478218
ENSG00000175130.6	-0.000446821	0.75639
ENSG00000175206.9	1.64793	0.513936
ENSG00000175592.7	-0.00395265	0.742301
ENSG00000175602.3	-0.00975945	0.197332
ENSG00000175634.13	-0.00509212	0.526549
ENSG00000176125.4	-0.0852256	0.448316
ENSG00000176728.6	-0.059689	0.775036
ENSG00000176871.7	-0.0162485	0.0412438
ENSG00000176884.13	0.0266465	0.669962
ENSG00000177045.7	0.00437888	0.937161
ENSG00000177191.2	0.0163586	0.215685
ENSG00000177370.4	-0.00448229	0.867115
ENSG00000177418.2	-1.26799	0.636486
ENSG00000177485.6	0.00386903	0.596423
ENSG00000177548.11	0.0211179	0.00312622
ENSG00000177628.14	-0.0127855	0.39389
ENSG00000177731.14	0.0018997	0.527473
ENSG00000177791.11	-2.12777	0.281198
ENSG00000177839.6	0.0242531	0.621259
ENSG00000177954.10	-0.00167754	0.111182
ENSG00000178028.12	0.0360028	0.0315534
ENSG00000178149.15	-0.0035314	0.833853
ENSG00000178252.16	0.00520457	0.135814
ENSG00000178297.11	-0.0120886	0.978907
ENSG00000178342.4	-0.461997	0.586569
ENSG00000178460.16	0.0341645	0.643216
ENSG00000178814.14	-3.61241e-05	0.995788
ENSG00000178821.11	-0.0730899	0.172373
ENSG00000178947.8	0.248762	0.0415102
ENSG00000179051.12	0.000464073	0.890233
ENSG00000179057.12	0.104822	0.320044
ENSG00000179131.7	-1.85054	0.197436
ENSG00000179222.16	0.00702326	0.0227927
ENSG00000179262.8	-0.00154458	0.778439
ENSG00000179271.2	-0.00594848	0.307124
ENSG00000179299.15	-0.064915	0.221215
ENSG00000179361.16	0.0334173	0.473636
ENSG00000179564.3	-0.630981	0.701881
ENSG00000179832.16	0.0026678	0.533355
ENSG00000179886.5	-0.0307866	0.184611
ENSG00000180061.8	0.0209683	0.0757248
ENSG00000180098.8	-0.101922	0.0374452
ENSG00000180279.5	-0.173861	0.884285
ENSG00000180385.7	-0.0172458	0.859777
ENSG00000180448.9	-0.00749436	0.365823
ENSG00000180900.15	0.000916024	0.677231
ENSG00000180919.3	-0.168035	0.964049
ENSG00000180929.5	0.708888	0.233322
ENSG00000181856.13	-0.014318	0.754349
ENSG00000181885.17	-0.000745336	0.563084
ENSG00000182048.10	0.27929	0.692261
ENSG00000182179.9	-0.000732065	0.927567
ENSG00000182196.12	0.0195167	0.878786
ENSG00000182199.9	-0.000436171	0.827076
ENSG00000182484.13	0.0641732	0.196486
ENSG00000182518.12	-0.0030425	0.957254
ENSG00000182578.12	-0.00578033	0.462558
ENSG00000182759.3	-1.11909	0.657605
ENSG00000182796.11	0.0476451	0.108794
ENSG00000182866.15	-0.0362602	0.160703
ENSG00000183020.12	0.0120478	0.0292251
ENSG00000183060.14	0.0319952	0.603305
ENSG00000183066.13	0.0591109	0.781816
ENSG00000183426.14	0.402516	0.000623263
ENSG00000183723.11	-0.00218279	0.60926
ENSG00000183773.14	-0.00573121	0.444392
ENSG00000183793.12	0.2604	0.223006
ENSG00000183798.4	0.00554333	0.993252
ENSG00000183889.11	2.13954	0.00775549
ENSG00000183963.17	0.00332949	0.174886
ENSG00000184058.11	-0.121287	0.770448
ENSG00000184209.14	0.013788	0.725242
ENSG00000184281.13	0.0089324	0.282876
ENSG00000184343.9	0.0782681	0.0329099
ENSG00000184363.8	0.00192347	0.258026
ENSG00000184481.15	0.00462823	0.792077
ENSG00000184575.10	-0.00538263	0.277181
ENSG00000184697.6	0.0311417	0.938953
ENSG00000184709.7	-0.0225534	0.299978
ENSG00000184860.8	0.0227151	0.384201
ENSG00000184908.16	0.194732	0.721049
ENSG00000184956.14	-0.0123749	0.540254
ENSG00000184979.9	-0.0162229	0.702882
ENSG00000184990.11	-0.00249077	0.475954
ENSG00000185038.13	-0.383504	0.70103
ENSG00000185133.12	0.017223	0.134609
ENSG00000185187.11	-0.00084084	0.903789
ENSG00000185324.20	0.00949778	0.0252143
ENSG00000185340.14	-0.0268501	0.164855
ENSG00000185507.18	0.00416881	0.649699
ENSG00000185519.8	-0.379252	0.452743
ENSG00000185567.6	0.00149986	0.696711
ENSG00000185614.4	-0.403877	0.212162
ENSG00000185615.14	0.0822999	0.00824861
ENSG00000185633.9	-0.00253003	0.707794
ENSG00000185792.8	0.350319	0.517437
ENSG00000185838.12	-0.0101668	0.698803
ENSG00000185864.15	0.0914918	0.158059
ENSG00000185896.10	0.000764939	0.435344
ENSG00000185915.5	-0.0328455	0.888981
ENSG00000186153.15	0.0356548	0.428499
ENSG00000186187.10	0.0173226	0.393708
ENSG00000186193.8	0.00171301	0.727862
ENSG00000186234.7	-0.264243	0.792161
ENSG00000186364.10	0.133637	0.695521
ENSG00000186471.11	0.116385	0.922661
ENSG00000186625.12	0.0103425	0.73622
ENSG00000186897.4	-2.68004	0.309537
ENSG00000186951.15	-0.00882937	0.43375
ENSG00000187024.12	0.473879	0.439789
ENSG00000187091.12	0.00154546	0.915481
ENSG00000187325.4	-0.00374592	0.833827
ENSG00000187479.5	0.00118834	0.887745
ENSG00000187583.9	-0.0190196	0.797033
ENSG00000187595.13	0.202944	0.26591
ENSG00000187634.9	0.0125288	0.870774
ENSG00000187642.8	-0.104223	0.609087
ENSG00000187682.1	0.326211	0.804974
ENSG00000187838.15	0.34387	0.525735
ENSG00000187848.11	-0.190174	0.905887
ENSG00000187959.8	0.468452	0.711113
ENSG00000187980.6	-1.48694	0.543113
ENSG00000188002.9	0.0801524	0.0398112
ENSG00000188056.10	-4.85661	0.148299
ENSG00000188070.9	0.0352644	0.00426344
ENSG00000188092.13	0.020833	0.898703
ENSG00000188163.7	0.266235	0.860753
ENSG00000188186.9	-0.00294832	0.385556
ENSG00000188229.5	-0.000220022	0.698546
ENSG00000188396.3	-1.89372	0.196306
ENSG00000188452.12	0.0260367	0.66214
ENSG00000188486.3	-0.0064751	0.183726
ENSG00000188505.4	-0.169002	0.569953
ENSG00000188613.6	-0.606173	0.242925
ENSG00000188779.9	0.339023	0.191089
ENSG00000188786.9	-0.0223057	0.408835
ENSG00000188976.9	0.00404952	0.320375
ENSG00000189046.9	-0.0119106	0.65042
ENSG00000189077.9	0.00699193	0.414878
ENSG00000189269.11	1.66819	0.0366102
ENSG00000189350.11	-1.11475	0.135142
ENSG00000189409.11	-1.88442	0.24315
ENSG00000196110.6	-0.254427	0.210249
ENSG00000196123.11	0.021441	0.199626
ENSG00000196169.13	-0.200468	0.16235
ENSG00000196187.10	0.00369661	0.0133821
ENSG00000196296.12	0.170031	0.0431286
ENSG00000196305.16	-0.00651755	0.0718216
ENSG00000196396.8	0.00121849	0.883153
ENSG00000196405.11	0.0031376	0.822932
ENSG00000196436.8	0.113425	0.00533057
ENSG00000196455.6	0.00831057	0.736106
ENSG00000196497.14	0.0315184	0.529355
ENSG00000196511.12	-0.044326	0.408578
ENSG00000196517.10	-0.0031266	0.865447
ENSG00000196557.9	0.0174912	0.0197886
ENSG00000196562.13	0.000438968	0.836356
ENSG00000196588.13	0.00654708	0.603368
ENSG00000196666.4	0.292374	0.745945
ENSG00000196696.11	0.0486568	0.0827355
ENSG00000196700.6	0.0443169	0.242948
ENSG00000196878.11	0.00190919	0.256095
ENSG00000196950.12	-0.00362925	0.70081
ENSG00000196976.6	0.00264712	0.76313
ENSG00000196979.1	-1.35422	0.66468
ENSG00000197226.11	0.00791767	0.0541106
ENSG00000197586.11	0.000548913	0.653786
ENSG00000197614.9	-0.00732138	0.687445
ENSG00000197629.5	-0.0452945	0.0180451
ENSG00000197746.12	-0.000446307	0.382093
ENSG00000197753.8	0.741872	0.397782
ENSG00000197785.12	-0.000871128	0.901345
ENSG00000197885.9	-0.0854192	0.456176
ENSG00000197893.12	0.0188315	0.922703
ENSG00000197956.8	-5.22845e-05	0.768063
ENSG00000197982.13	-0.00448593	0.715942
ENSG00000197989.12	-0.0326916	0.299948
ENSG00000197993.6	-0.0127371	0.98536
ENSG00000198026.7	0.015179	0.197618
ENSG00000198089.13	-0.000314329	0.985185
ENSG00000198208.10	0.0358673	0.249327
ENSG00000198231.11	0.0101557	0.109544
ENSG00000198252.10	-0.0516556	0.0655541
ENSG00000198467.12	0.00013879	0.900702
ENSG00000198517.8	0.00666006	0.321607
ENSG00000198643.5	-0.00154717	0.232441
ENSG00000198646.12	0.00545156	0.0903989
ENSG00000198720.11	0.00632394	0.709242
ENSG00000198832.9	-0.00790772	0.318139
ENSG00000198853.10	0.0171933	0.265621
ENSG00000198931.9	-0.000439099	0.867838
ENSG00000198937.8	-0.00786775	0.746632
ENSG00000198944.5	0.000311175	0.980437
ENSG00000198951.10	-0.0194135	0.0906119
ENSG00000201264.1	-1.51843	0.528069
ENSG00000202343.1	-1.49216	0.462118
ENSG00000202533.1	0.0940272	0.89961
ENSG00000203667.8	-0.00161253	0.976184
ENSG00000203734.10	-0.518664	0.553689
ENSG00000203772.7	0.116352	0.133552
ENSG00000203804.4	-0.185778	0.50343
ENSG00000203811.1	-0.922529	0.547425
ENSG00000204019.4	-0.331249	0.55913
ENSG00000204033.8	-0.163442	0.54784
ENSG00000204084.11	-0.0110639	0.842649
ENSG00000204165.5	0.0610808	0.899552
ENSG00000204172.10	0.189278	0.0451065
ENSG00000204347.3	1.57904	0.000766255
ENSG00000204396.9	0.0482658	0.422837
ENSG00000204420.7	0.142082	0.42423
ENSG00000204421.2	-0.137319	0.415622
ENSG00000204475.8	-1.06005	0.186167
ENSG00000204482.9	-0.147414	0.0389239
ENSG00000204560.8	0.0259949	0.0227323
ENSG00000204564.10	-0.00722414	0.709101
ENSG00000204618.7	0.0379621	0.385816
ENSG00000204619.6	-0.00656716	0.433952
ENSG00000204644.8	-0.618606	0.455557
ENSG00000204710.2	0.151705	0.171238
ENSG00000204791.7	0.145741	0.740506
ENSG00000205090.7	-0.148775	0.736323
ENSG00000205643.9	-0.0543895	0.48063
ENSG00000205702.9	0.0485206	0.572271
ENSG00000205744.8	0.0161853	0.231582
ENSG00000206384.9	-0.418813	0.38514
ENSG00000206530.7	0.0209028	0.248936
ENSG00000206561.11	0.304301	0.0907859
ENSG00000206567.8	0.042805	0.868856
ENSG00000207721.1	-0.499341	0.626428
ENSG00000207864.2	-2.3212	0.561059
ENSG00000210195.2	0.197703	0.563032
ENSG00000210196.2	-0.016449	0.0819035
ENSG00000211445.10	-0.00101764	0.859729
ENSG00000211450.8	-0.00336782	0.528963
ENSG00000211584.12	-0.0148868	0.47478
ENSG00000213071.9	0.619655	0.00687826
ENSG00000213373.6	-0.633813	0.851768
ENSG00000213590.2	-0.415531	0.666739
ENSG00000213694.3	0.0141311	0.566203
ENSG00000213722.7	0.00839052	0.00350117
ENSG00000213822.6	0.17173	0.230249
ENSG00000213937.3	0.056756	0.356409
ENSG00000214142.2	-3.28239	0.453404
ENSG00000214595.10	-0.1672	0.282078
ENSG00000214655.9	0.016468	0.121313
ENSG00000214706.9	-0.00340124	0.440763
ENSG00000214733.7	0.869281	0.147542
ENSG00000214765.7	0.0237063	0.690292
ENSG00000214860.4	2.60083	0.195517
ENSG00000214867.3	-1.90022	0.0864481
ENSG00000215187.8	-0.51196	0.536292
ENSG00000215458.7	0.0552785	0.568213
ENSG00000215859.7	0.170007	0.792061
ENSG00000215914.4	-0.747086	0.515098
ENSG00000217442.3	-0.572788	0.570919
ENSG00000218537.1	0.207333	0.391851
ENSG00000219361.1	4.05035	0.376541
ENSG00000219433.2	-1.1959	0.523938
ENSG00000219700.1	0.208321	0.839592
ENSG00000220848.4	-0.496802	0.0776909
ENSG00000221539.1	-0.252844	0.663848
ENSG00000221821.3	-0.0191015	0.82794
ENSG00000221869.4	-0.0274215	0.0150179
ENSG00000222448.1	0.060182	0.977241
ENSG00000223403.3	-0.215602	0.883842
ENSG00000223572.8	0.00928458	0.64254
ENSG00000223705.8	0.0362364	0.0186897
ENSG00000223764.2	0.084156	0.620887
ENSG00000223802.6	0.776991	0.430963
ENSG00000224016.2	2.05906	0.0543351
ENSG00000224066.1	0.315286	0.713828
ENSG00000224312.1	0.592999	0.819985
ENSG00000224712.9	0.708722	0.134034
ENSG00000224961.1	-0.232276	0.239957
ENSG00000224976.2	-0.91718	0.356068
ENSG00000225031.1	0.0915615	0.336314
ENSG00000225419.1	1.02567	0.448034
ENSG00000225526.4	-0.0761941	0.532022
ENSG00000225531.1	-1.36656	0.410207
ENSG00000225840.2	-0.166708	0.425433
ENSG00000225889.6	-0.0375705	0.86912
ENSG00000225969.1	-0.0281573	0.40335
ENSG00000226047.1	-2.34362	0.223031
ENSG00000226054.2	0.126679	0.667809
ENSG00000226055.2	-1.88355	0.271817
ENSG00000226686.6	-0.333727	0.710466
ENSG00000226943.3	0.564429	0.342188
ENSG00000226950.5	-0.0170233	0.0561283
ENSG00000227039.5	-0.175109	0.58236
ENSG00000227066.1	-5.88453	0.0720385
ENSG00000227070.1	0.0957679	0.838125
ENSG00000227218.6	-0.0492012	0.878344
ENSG00000227473.1	0.191952	0.471071
ENSG00000227620.4	2.24593	0.0329601
ENSG00000227632.2	-0.335026	0.809414
ENSG00000227683.1	0.301607	0.318378
ENSG00000227741.1	-1.43143	0.334016
ENSG00000227742.1	-0.835785	0.462986
ENSG00000227802.1	-0.81178	0.824297
ENSG00000228071.4	-0.602196	0.426317
ENSG00000228278.3	0.0342919	0.846561
ENSG00000228347.1	-1.07602	0.70707
ENSG00000228474.4	-0.00323288	0.329109
ENSG00000228727.7	0.56337	0.0052102
ENSG00000228962.1	-1.36929	0.757582
ENSG00000229122.1	1.30929	0.182092
ENSG00000229407.4	-1.85746	0.596106
ENSG00000229720.1	-1.09281	0.639815
ENSG00000229939.1	0.272995	0.405009
ENSG00000229960.1	0.615492	0.19073
ENSG00000229980.4	0.431028	0.0175092
ENSG00000230170.1	0.560851	0.830749
ENSG00000230262.5	1.32345	0.575902
ENSG00000230929.5	0.934286	0.0616219
ENSG00000231177.4	-0.336443	0.408534
ENSG00000231672.5	-0.862077	0.442568
ENSG00000231720.1	1.22686	0.00173122
ENSG00000231760.4	0.0869255	0.817959
ENSG00000231852.5	0.193711	0.885401
ENSG00000232218.1	-0.683104	0.835793
ENSG00000232491.1	-0.00198016	0.999016
ENSG00000232677.5	0.0134247	0.584413
ENSG00000232742.3	-11.5744	0.0150201
ENSG00000233024.6	7.42321	0.00539218
ENSG00000233101.9	0.0173792	0.263908
ENSG00000233330.1	-2.36665	0.185123
ENSG00000233337.1	-0.100104	0.80062
ENSG00000233381.3	1.06561	0.294
ENSG00000233436.6	-1.79734	0.504755
ENSG00000233622.1	-0.0990174	0.66143
ENSG00000233750.3	-0.479526	0.839475
ENSG00000233783.6	-0.482976	0.590833
ENSG00000233885.6	0.0792721	0.663918
ENSG00000233947.1	-4.59143	0.0442096
ENSG00000234160.1	0.0713256	0.779922
ENSG00000234290.2	-0.0407131	0.665701
ENSG00000234345.2	-0.224004	0.885012
ENSG00000234354.3	-2.0751	0.275827
ENSG00000234405.1	0.494442	0.648749
ENSG00000234409.6	0.334343	0.241492
ENSG00000234769.7	1.83066	4.99093e-05
ENSG00000234776.3	0.291703	0.82105
ENSG00000234848.1	1.64939	0.162749
ENSG00000234900.1	-7.72911	0.253055
ENSG00000235077.1	0.0647106	0.954694
ENSG00000235079.1	-1.01182	0.540894
ENSG00000235173.5	-0.000139578	0.986162
ENSG00000235194.7	0.0963542	0.0983355
ENSG00000235399.1	-2.90672	0.514861
ENSG00000235663.1	1.19496	0.604717
ENSG00000235821.1	-2.81441	0.257436
ENSG00000235961.5	0.284179	0.0104065
ENSG00000236194.3	-5.91318	0.245327
ENSG00000236289.2	0.340067	0.756071
ENSG00000236397.3	-1.01214	0.0791523
ENSG00000236675.1	-0.102705	0.6993
ENSG00000236830.5	-0.0318594	0.731144
ENSG00000236989.4	0.451324	0.640848
ENSG00000237101.1	1.60179	0.273166
ENSG00000237172.3	-0.00989463	0.796043
ENSG00000237190.3	-0.0284681	0.247734
ENSG00000237214.3	-0.20272	0.150981
ENSG00000237264.4	-0.617055	0.304639
ENSG00000237452.2	0.140846	0.835048
ENSG00000237517.7	0.144991	0.518605
ENSG00000237807.3	0.177846	0.000980391
ENSG00000238151.1	0.968759	0.491123
ENSG00000238178.5	0.0120726	0.552328
ENSG00000238271.2	-0.0532593	0.951145
ENSG00000238279.1	0.050399	0.480599
ENSG00000239253.1	-1.51475	0.717012
ENSG00000239264.7	-0.0315006	0.327596
ENSG00000239480.1	-2.83202	0.398708
ENSG00000239486.1	-0.0214176	0.967884
ENSG00000239779.5	0.0643462	0.150945
ENSG00000239969.4	0.778377	0.182995
ENSG00000240288.6	0.00147386	0.996837
ENSG00000240338.4	-1.09308	0.645478
ENSG00000240674.1	-1.74425	0.2811
ENSG00000240710.1	2.56116	0.0388478
ENSG00000240729.1	-1.56976	0.432626
ENSG00000240874.1	-2.73049	0.272475
ENSG00000240915.2	-1.66376	0.661197
ENSG00000240972.1	-0.00573825	0.234265
ENSG00000241527.1	-2.24721	0.543754
ENSG00000241878.8	0.00836265	0.6586
ENSG00000242094.1	-0.598341	0.544388
ENSG00000242199.1	-0.353895	0.796019
ENSG00000242252.1	1.28244	0.00938514
ENSG00000242602.1	-1.83171	0.407084
ENSG00000242731.3	-0.822253	0.73656
ENSG00000242852.5	-0.403072	0.680212
ENSG00000242876.3	-3.00785	0.454117
ENSG00000242952.1	-1.26076	0.225249
ENSG00000243708.7	0.653269	0.234589
ENSG00000243716.9	-0.00386234	0.920472
ENSG00000243960.1	0.0417763	0.951471
ENSG00000244038.8	-0.00127217	0.421202
ENSG00000244165.1	-0.0144168	0.779694
ENSG00000244355.6	0.0208616	0.0761029
ENSG00000244383.1	-0.546619	0.448821
ENSG00000244607.4	-0.254293	0.708955
ENSG00000244953.1	0.195704	0.810351
ENSG00000245317.2	0.700537	0.119939
ENSG00000245910.7	-0.00742878	0.226028
ENSG00000246548.3	-0.56309	0.778649
ENSG00000246596.5	0.607894	0.0275732
ENSG00000247679.2	0.250137	0.152814
ENSG00000247728.2	1.93278	0.581989
ENSG00000248126.1	6.60625	0.00153498
ENSG00000248309.4	-0.597767	0.579242
ENSG00000248375.1	-2.86083	0.0401167
ENSG00000248559.1	-2.1502	0.208141
ENSG00000248712.6	0.387565	0.0245851
ENSG00000249035.5	-0.327258	0.429838
ENSG00000249635.1	-0.598091	0.720474
ENSG00000249751.3	-0.295317	0.275371
ENSG00000249987.1	-2.67633	0.261123
ENSG00000250363.1	-0.370243	0.769718
ENSG00000250641.1	0.0121301	0.0944074
ENSG00000250794.2	-0.324444	0.805893
ENSG00000250906.1	0.848094	0.41853
ENSG00000251087.3	0.381159	0.0890469
ENSG00000251179.1	-0.212203	0.716219
ENSG00000251271.3	0.71534	0.712265
ENSG00000251603.1	-0.831216	0.314539
ENSG00000251669.4	0.0250932	0.853247
ENSG00000251774.1	-1.03696	0.562399
ENSG00000252202.1	2.81143	0.267207
ENSG00000253304.1	0.00613666	0.939593
ENSG00000253641.4	0.237421	0.0316686
ENSG00000253649.2	0.0932639	0.206067
ENSG00000253708.1	-0.602267	0.887731
ENSG00000253755.1	-0.0136915	0.231273
ENSG00000254429.1	2.67108	0.499644
ENSG00000254521.5	-0.227149	0.11287
ENSG00000254536.1	3.88273	0.215642
ENSG00000254545.1	-0.594677	0.832051
ENSG00000254605.1	0.301674	0.444332
ENSG00000254777.4	-1.31259	0.240844
ENSG00000254802.1	-0.143126	0.676775
ENSG00000254814.1	-0.954023	0.730859
ENSG00000254978.2	1.84153	0.103912
ENSG00000255191.1	-0.0183361	0.985788
ENSG00000255200.1	0.454656	0.00418539
ENSG00000255282.5	0.0169022	0.950594
ENSG00000255366.1	-0.575272	0.608232
ENSG00000255478.1	6.79307	0.135089
ENSG00000255581.1	-7.89986	0.198069
ENSG00000255769.6	0.0821269	0.321732
ENSG00000255823.2	0.00891076	0.781747
ENSG00000255864.4	-6.00197	0.228054
ENSG00000255867.1	0.589773	0.341147
ENSG00000255964.1	-0.748612	0.685205
ENSG00000255967.1	-1.47601	0.173948
ENSG00000256028.2	0.692429	0.345599
ENSG00000256210.3	-0.0123707	0.986104
ENSG00000256269.5	-0.00893957	0.333775
ENSG00000256603.1	-5.16712	0.206166
ENSG00000256943.1	0.488714	0.342846
ENSG00000257283.1	-0.840636	0.727975
ENSG00000257337.5	-0.0193586	0.826968
ENSG00000257390.4	-1.88995	0.18219
ENSG00000257475.2	-1.13523	0.495349
ENSG00000257727.4	0.0293188	0.152265
ENSG00000257740.1	-0.542883	0.512023
ENSG00000258130.6	-2.07059	0.450729
ENSG00000258301.3	0.31338	0.391738
ENSG00000258315.4	0.559985	0.0246114
ENSG00000258405.8	-0.0642943	0.880369
ENSG00000258427.3	-0.43781	0.323973
ENSG00000258539.1	0.119789	0.810467
ENSG00000258558.1	-1.4562	0.6711
ENSG00000258626.2	-0.150102	0.959356
ENSG00000258727.1	0.0670967	0.418663
ENSG00000258819.1	-3.12078	0.365015
ENSG00000258890.5	-0.000129392	0.994789
ENSG00000259040.4	0.697689	0.749453
ENSG00000259093.1	-4.68136	0.372307
ENSG00000259399.1	1.15594	0.507565
ENSG00000259519.1	2.58292	0.340149
ENSG00000259522.2	1.0812	0.429301
ENSG00000259605.3	0.201998	0.331864
ENSG00000259647.1	-1.77938	0.641334
ENSG00000259762.1	-0.204484	0.816111
ENSG00000259780.3	0.656881	0.526516
ENSG00000259803.5	0.0151875	0.344505
ENSG00000259807.1	-0.128101	0.569836
ENSG00000259895.1	-1.94554	0.532965
ENSG00000259933.5	0.0110073	0.590166
ENSG00000260001.5	0.0832187	0.874225
ENSG00000260027.4	0.00495943	0.622813
ENSG00000260105.5	-1.03479	0.466277
ENSG00000260190.1	-2.35162	0.359264
ENSG00000260238.4	0.668033	0.0278379
ENSG00000260500.1	-4.85141	0.343572
ENSG00000260517.2	-0.13231	0.733897
ENSG00000260645.1	0.0342557	0.897268
ENSG00000261052.4	5.87931	0.00541557
ENSG00000261123.1	0.0530662	0.204726
ENSG00000261295.1	-0.194706	0.209335
ENSG00000261456.4	-0.273275	0.867413
ENSG00000261548.1	-6.65422	0.16144
ENSG00000261659.2	-0.0443944	0.762509
ENSG00000261668.1	-0.755047	0.46871
ENSG00000261707.1	3.22962	0.103348
ENSG00000261884.2	-0.0343981	0.809132
ENSG00000261924.1	-2.13942	0.326051
ENSG00000262006.1	3.67952	0.0412886
ENSG00000262074.5	-13.1745	0.0849381
ENSG00000262877.4	0.122339	0.0986367
ENSG00000262943.6	0.211384	0.0345168
ENSG00000263011.1	-1.60437	0.508401
ENSG00000263050.1	-0.754602	0.290878
ENSG00000263214.1	-2.87046	0.0505208
ENSG00000263316.1	-0.11959	0.928528
ENSG00000263429.3	-0.0436124	0.0198639
ENSG00000263765.4	-10.4884	0.0942558
ENSG00000264215.1	-2.48142	0.619066
ENSG00000264535.1	-3.5153	0.513508
ENSG00000264635.1	-0.655404	0.51761
ENSG00000265185.4	-6.52035	0.262564
ENSG00000265912.1	-0.643353	0.503955
ENSG00000266171.1	-0.949523	0.445923
ENSG00000266289.1	-3.25755	0.180126
ENSG00000266402.3	-0.0761082	0.16214
ENSG00000266733.4	-0.164469	0.87539
ENSG00000267053.5	2.09287	0.0704216
ENSG00000267074.1	-2.12858	0.15375
ENSG00000267105.1	-1.34419	0.273417
ENSG00000267369.1	-0.521339	0.363567
ENSG00000267383.5	-0.0791314	0.835856
ENSG00000267405.1	0.872259	0.378786
ENSG00000267466.1	0.0924138	0.659523
ENSG00000267480.1	-0.378617	0.367669
ENSG00000267484.1	-3.18246	0.0693787
ENSG00000267505.1	0.234235	0.727212
ENSG00000267506.4	0.0721052	0.47843
ENSG00000267510.1	0.483439	0.42675
ENSG00000267605.4	0.338185	0.730803
ENSG00000267724.1	-1.25663	0.452246
ENSG00000267748.4	1.47682	0.0311114
ENSG00000268104.2	0.00235092	0.769045
ENSG00000268288.1	-1.91065	0.659985
ENSG00000268575.1	0.137398	0.471651
ENSG00000268903.1	-0.0388119	0.819603
ENSG00000268938.2	2.2795	0.137455
ENSG00000268970.1	0.363198	0.207772
ENSG00000269514.1	0.0780676	0.81845
ENSG00000269656.1	-0.00561739	0.997133
ENSG00000269858.4	0.0223331	0.390017
ENSG00000269893.5	-0.0158074	0.11151
ENSG00000269982.1	-0.00700099	0.955135
ENSG00000270074.1	4.62863	0.0654239
ENSG00000270433.1	-1.00496	0.62646
ENSG00000270510.1	-1.79709	0.399214
ENSG00000270706.1	-2.06955	0.170067
ENSG00000270765.4	-0.826461	0.669579
ENSG00000270882.2	-0.166043	0.922182
ENSG00000270885.1	0.0135592	0.723702
ENSG00000271138.1	-1.39184	0.551661
ENSG00000271553.1	0.106025	0.568082
ENSG00000271913.4	-0.207888	0.709621
ENSG00000272006.1	1.23751	0.388797
ENSG00000272034.1	0.668323	0.1182
ENSG00000272087.1	-0.11279	0.713056
ENSG00000272112.1	0.103955	0.869244
ENSG00000272148.1	-1.28206	0.358356
ENSG00000272223.1	1.79508	0.0576536
ENSG00000272333.4	0.0115233	0.0890835
ENSG00000272379.1	1.15674	0.733896
ENSG00000272391.4	0.00771576	0.589027
ENSG00000272438.1	0.310421	0.798521
ENSG00000272645.2	0.136882	0.0623332
ENSG00000272689.1	-0.882694	0.541194
ENSG00000272791.1	0.446202	0.563581
ENSG00000272798.1	-0.640666	0.801989
ENSG00000272821.1	-0.00234732	0.982414
ENSG00000272829.1	-1.98575	0.095311
ENSG00000273027.1	-0.0123475	0.994251
ENSG00000273073.1	0.428923	0.87607
ENSG00000273226.1	0.300786	0.260679
ENSG00000273265.1	0.199771	0.82817
ENSG00000273311.1	-0.298163	0.245544
ENSG00000273350.1	-0.805344	0.479851
ENSG00000274049.3	1.75318	0.536217
ENSG00000274363.1	-2.73649	0.384417
ENSG00000274736.3	-0.193478	0.7025
ENSG00000275301.1	-14.4004	0.201416
ENSG00000275793.1	-0.733751	0.583273
ENSG00000276298.1	1.02218	0.578134
ENSG00000276742.1	0.0944945	0.939139
ENSG00000276772.1	3.38131	0.203342
ENSG00000277358.1	-4.79526	0.227232
ENSG00000277542.1	1.37484	0.670034
ENSG00000277877.3	-0.0614511	0.681851
ENSG00000277895.1	-0.758585	0.638623
ENSG00000278075.1	-1.52027	0.536871
ENSG00000278603.1	-0.0140866	0.991388
ENSG00000278690.1	0.0511776	0.977233
ENSG00000278932.2	1.54982	0.0281131
ENSG00000278978.1	-0.0618098	0.729455
ENSG00000279117.1	-0.0631712	0.198249
ENSG00000279208.1	-0.534276	0.872803
ENSG00000279322.1	0.0723242	0.964618
ENSG00000279332.1	-0.360991	0.622336
ENSG00000279375.1	-0.0417927	0.88796
ENSG00000279464.1	-0.295797	0.718692
ENSG00000279484.1	-0.323537	0.828591
ENSG00000279774.1	0.0929013	0.877362
ENSG00000279792.1	0.154773	0.771233
ENSG00000280169.1	0.210792	0.797857
ENSG00000280212.1	0.150202	0.936936
ENSG00000280213.1	0.0898777	0.270238
ENSG00000280311.1	-1.15202	0.54329
ENSG00000280328.1	-0.324278	0.468004
ENSG00000281538.1	-0.444939	0.654161
ENSG00000281691.1	-0.218156	0.821426

## Sheet: CG.DFI.HNSC
Gene	Coefficient	Logrank p-value
ENSG00000002330.12	-0.000954353	0.90876
ENSG00000004487.14	-0.0108058	0.141541
ENSG00000004534.13	-0.000600753	0.962088
ENSG00000004777.17	-0.0831856	0.192156
ENSG00000004864.12	-0.00385146	0.808958
ENSG00000004975.10	-0.0265543	0.136496
ENSG00000005007.11	-0.0111518	0.0655692
ENSG00000005059.14	-0.00866545	0.48338
ENSG00000006007.10	-0.017462	0.125754
ENSG00000006047.11	-0.0419461	0.320098
ENSG00000006282.18	-0.00383662	0.730516
ENSG00000006283.16	-0.0310424	0.713889
ENSG00000008056.11	0.22656	0.0392093
ENSG00000008083.12	-0.00474966	0.474247
ENSG00000008118.8	-0.219894	0.613413
ENSG00000008256.14	0.00185036	0.886207
ENSG00000008323.14	-0.0111352	0.396302
ENSG00000008438.4	-0.0752058	0.87059
ENSG00000008441.15	-0.00513496	0.308868
ENSG00000009724.15	-0.463867	0.491355
ENSG00000010327.9	0.0112888	0.000581291
ENSG00000011009.9	-0.00277289	0.60452
ENSG00000011143.15	-0.0667079	0.279011
ENSG00000011304.15	-0.00218878	0.475907
ENSG00000012211.11	-0.0131393	0.646949
ENSG00000013306.14	-0.00146688	0.515128
ENSG00000015532.8	0.010967	0.355257
ENSG00000016402.11	-0.0415414	0.0888113
ENSG00000016864.15	0.0227813	0.178945
ENSG00000019102.10	0.00671186	0.823188
ENSG00000019144.15	0.0106367	0.112169
ENSG00000025708.11	-0.0002819	0.554421
ENSG00000029639.9	-0.0432518	0.420002
ENSG00000030582.15	-5.31807e-05	0.907159
ENSG00000033100.13	-0.00316935	0.58513
ENSG00000035681.6	0.014334	0.212043
ENSG00000035720.6	0.0269311	0.915597
ENSG00000037042.8	-0.0511402	0.281065
ENSG00000042062.10	0.00506916	0.805234
ENSG00000047579.18	-0.0156244	0.633576
ENSG00000047849.20	0.000896458	0.376125
ENSG00000048462.9	0.0649595	0.328592
ENSG00000050426.14	0.00333761	0.841091
ENSG00000050820.15	-0.00350853	0.458964
ENSG00000052344.14	-0.00811087	0.0424731
ENSG00000054983.15	-0.0241427	0.298718
ENSG00000055211.11	-0.0018681	0.894842
ENSG00000059691.10	0.00386701	0.86492
ENSG00000059915.15	-0.0462043	0.594519
ENSG00000061273.16	-0.00451532	0.605862
ENSG00000062096.13	0.251771	0.348753
ENSG00000062282.13	-0.00475806	0.639512
ENSG00000062524.14	0.0716944	0.209177
ENSG00000064012.20	-0.00258805	0.881323
ENSG00000064309.13	-0.00656302	0.804139
ENSG00000064601.15	0.00111193	0.674823
ENSG00000064932.14	-0.000231428	0.938772
ENSG00000065320.7	-0.00600641	0.372885
ENSG00000065923.8	0.000709358	0.951675
ENSG00000067182.6	0.000472132	0.866878
ENSG00000067704.9	0.00358454	0.535133
ENSG00000067829.17	-0.0111875	0.253126
ENSG00000068137.13	-0.0150354	0.220949
ENSG00000068305.16	0.00333835	0.747641
ENSG00000068383.17	0.0124464	0.673924
ENSG00000068615.15	0.0155322	0.16554
ENSG00000069424.13	0.0185208	0.19327
ENSG00000070047.10	0.00221519	0.663586
ENSG00000070985.12	0.170959	0.31047
ENSG00000071282.10	0.0258865	0.0192536
ENSG00000072163.17	0.0259897	0.391758
ENSG00000072518.19	-0.0037726	0.467921
ENSG00000072736.17	-0.0203515	0.294174
ENSG00000072778.18	-0.00309998	0.185661
ENSG00000074276.9	-1.19778	0.0354976
ENSG00000075975.14	0.0138215	0.644037
ENSG00000076067.10	0.00189005	0.79146
ENSG00000076108.10	-0.00218818	0.602898
ENSG00000076344.14	-0.00134054	0.984664
ENSG00000076706.13	-0.000184807	0.958241
ENSG00000077092.17	0.0229356	0.223799
ENSG00000077097.12	0.000763805	0.89163
ENSG00000077150.16	-0.000236279	0.953951
ENSG00000078061.11	0.00152723	0.890547
ENSG00000078814.14	0.00483761	0.0735467
ENSG00000081181.6	-0.0433422	0.233646
ENSG00000082014.15	0.00920257	0.430944
ENSG00000083812.10	-0.0825866	0.219206
ENSG00000084693.14	-0.023066	0.305027
ENSG00000084754.9	-0.000413917	0.891793
ENSG00000086159.11	-0.0869907	0.851808
ENSG00000087087.17	-0.0139408	0.0972997
ENSG00000087191.11	-0.00332067	0.364047
ENSG00000088038.16	-0.0294318	0.108734
ENSG00000089050.13	-0.020088	0.30382
ENSG00000089163.4	0.14808	0.710765
ENSG00000089486.15	-0.0135049	0.285621
ENSG00000089820.14	-0.00407847	0.579252
ENSG00000090097.19	-0.00244477	0.848948
ENSG00000090975.11	-0.00648712	0.742023
ENSG00000091622.14	-0.0269136	0.0210401
ENSG00000092010.13	-0.000136857	0.936751
ENSG00000092051.15	-0.0856812	0.747407
ENSG00000092108.19	-0.00544179	0.679628
ENSG00000092758.14	-0.0393335	0.416564
ENSG00000092820.16	-0.000636626	0.481403
ENSG00000093144.17	-0.00525763	0.692008
ENSG00000096063.13	-0.00239053	0.741845
ENSG00000096384.18	-0.000296059	0.505047
ENSG00000099365.8	-0.0339798	0.840588
ENSG00000099377.12	-0.00310295	0.878577
ENSG00000099795.5	-0.00202689	0.580166
ENSG00000099797.10	-0.00291662	0.32276
ENSG00000099800.6	0.000770238	0.858495
ENSG00000099817.10	0.000734303	0.83214
ENSG00000099821.12	-0.005508	0.649444
ENSG00000099822.2	0.0113135	0.898932
ENSG00000099899.13	-0.0283091	0.170688
ENSG00000099904.14	-0.0221713	0.0916923
ENSG00000099956.16	-0.0147007	0.132999
ENSG00000099957.15	0.292498	0.0142564
ENSG00000099958.13	0.0084682	0.187107
ENSG00000099960.11	-0.0327315	0.611992
ENSG00000100078.3	-0.00725014	0.582947
ENSG00000100079.6	0.164429	0.000273109
ENSG00000100139.12	-0.00270641	0.185061
ENSG00000100196.9	-0.0042522	0.601367
ENSG00000100201.17	-0.000759835	0.795412
ENSG00000100220.10	-0.00564355	0.344155
ENSG00000100239.14	-0.00984905	0.389512
ENSG00000100241.19	-0.00230163	0.54069
ENSG00000100276.9	-0.174586	0.787375
ENSG00000100359.19	-0.000951676	0.934771
ENSG00000100417.10	-0.0205556	0.275802
ENSG00000100433.14	-0.0443497	0.195611
ENSG00000100522.7	-0.0265769	0.0957028
ENSG00000100767.14	0.00198844	0.61469
ENSG00000100908.12	-0.0272973	0.440576
ENSG00000100918.11	-0.00861424	0.705746
ENSG00000100979.13	0.000410478	0.834695
ENSG00000100982.10	-0.0222485	0.221572
ENSG00000100991.10	-0.00532009	0.380242
ENSG00000101003.9	-0.00877381	0.5771
ENSG00000101004.13	-0.00067637	0.976515
ENSG00000101082.12	0.0379365	0.349969
ENSG00000101084.15	-0.00399399	0.745964
ENSG00000101158.11	-0.0129773	0.126592
ENSG00000101160.12	0.00130139	0.0349059
ENSG00000101190.11	-0.0328101	0.352513
ENSG00000101220.16	0.00113161	0.842682
ENSG00000101298.12	0.0196814	0.682295
ENSG00000101343.13	0.00585756	0.710504
ENSG00000101384.10	-0.000464673	0.571178
ENSG00000101460.11	-0.00347247	0.818681
ENSG00000101464.9	-0.00854851	0.539697
ENSG00000101882.8	-0.000658009	0.982206
ENSG00000102007.9	-0.000112691	0.932065
ENSG00000102109.8	-0.0191888	0.643394
ENSG00000102144.12	-0.000202088	0.751773
ENSG00000102302.7	-0.0156929	0.428831
ENSG00000102362.14	-0.0372762	0.491881
ENSG00000102710.18	0.0208141	0.339232
ENSG00000102854.13	-0.00116801	0.621344
ENSG00000102978.11	-0.00337908	0.800495
ENSG00000102984.13	-0.302525	0.230152
ENSG00000103024.6	-0.0133472	0.318062
ENSG00000103044.9	-0.000311025	0.76873
ENSG00000103067.10	-0.0053844	0.250721
ENSG00000103111.13	-0.0169015	0.338457
ENSG00000103126.13	-0.030803	0.0450496
ENSG00000103264.14	0.00126328	0.959516
ENSG00000103351.11	-0.000400682	0.984807
ENSG00000103415.10	-0.00566477	0.207459
ENSG00000103426.11	3.27891	0.495428
ENSG00000103479.13	0.00452764	0.679485
ENSG00000103510.18	-0.0456292	0.0999264
ENSG00000104341.15	0.00246603	0.240378
ENSG00000104524.12	-0.0166565	0.304186
ENSG00000104660.16	0.0168251	0.327144
ENSG00000104679.9	0.00424909	0.794481
ENSG00000104859.13	-0.0196055	0.351185
ENSG00000104903.4	0.0793578	0.329773
ENSG00000104936.16	0.0165304	0.000912051
ENSG00000104964.13	-0.00279744	0.220328
ENSG00000105135.14	-0.00284543	0.694997
ENSG00000105137.11	-0.00820541	0.622127
ENSG00000105258.7	-0.0227125	0.305817
ENSG00000105261.6	-0.836466	0.561094
ENSG00000105325.12	-0.0100054	0.300586
ENSG00000105355.7	-0.000268543	0.902981
ENSG00000105364.12	-0.00323919	0.695399
ENSG00000105373.17	-0.00094712	0.619386
ENSG00000105556.9	-0.0134183	0.544714
ENSG00000105617.3	-0.0253247	0.574102
ENSG00000105655.17	-0.0206993	0.096808
ENSG00000105656.11	0.00259515	0.884256
ENSG00000105662.14	-0.0755448	0.0688523
ENSG00000105664.9	-0.00362699	0.533765
ENSG00000105701.14	-0.00164833	0.415069
ENSG00000105708.8	0.0169834	0.782301
ENSG00000105856.12	-0.00116457	0.892267
ENSG00000105877.16	-0.316186	0.0885765
ENSG00000105996.6	0.114457	0.408929
ENSG00000106077.17	-0.0228684	0.286387
ENSG00000106123.10	-0.00678649	0.466601
ENSG00000106346.10	-0.013878	0.675678
ENSG00000106367.12	-0.00547462	0.516467
ENSG00000106484.13	-0.00423461	0.571356
ENSG00000106624.7	0.000141071	0.806366
ENSG00000106628.9	-7.22644e-05	0.983413
ENSG00000106948.15	0.00715212	0.335299
ENSG00000106991.12	0.000970923	0.792049
ENSG00000107159.11	-0.00606048	0.321232
ENSG00000107201.8	0.000835449	0.704688
ENSG00000107404.16	-0.00314376	0.530921
ENSG00000107581.11	-0.000254846	0.890677
ENSG00000107672.13	0.00322491	0.893849
ENSG00000107736.18	-0.0055293	0.796373
ENSG00000107829.12	-0.00770987	0.485004
ENSG00000107859.8	0.818748	0.0223806
ENSG00000107872.11	-0.00816735	0.716171
ENSG00000107874.9	0.00305638	0.737044
ENSG00000107902.12	-0.0200916	0.287516
ENSG00000108262.14	-0.00556372	0.37543
ENSG00000108309.11	-0.00817767	0.731601
ENSG00000108556.7	0.00625411	0.909731
ENSG00000108591.8	-0.0679433	0.024762
ENSG00000108592.15	-0.0155082	0.138729
ENSG00000108602.16	-0.000632834	0.433691
ENSG00000108604.14	-0.0140305	0.0667928
ENSG00000108788.10	0.00204124	0.919508
ENSG00000108797.10	-0.0201885	0.533942
ENSG00000108799.11	0.00959077	0.741966
ENSG00000108840.14	-0.00996362	0.288283
ENSG00000108846.14	0.00341909	0.586061
ENSG00000108854.14	0.00487397	0.797909
ENSG00000108924.12	0.00307076	0.727087
ENSG00000108963.16	-0.0456996	0.28605
ENSG00000109519.11	-0.000519426	0.958221
ENSG00000109686.15	-0.00633542	0.352791
ENSG00000109956.11	0.276443	0.209323
ENSG00000110042.6	0.0160046	0.241077
ENSG00000110395.4	0.00341981	0.74854
ENSG00000110697.11	-0.00416452	0.485837
ENSG00000110700.5	0.000534583	0.603393
ENSG00000110711.8	-0.00270134	0.702841
ENSG00000110925.5	-0.0105278	0.728103
ENSG00000111077.16	0.00183395	0.894369
ENSG00000111087.8	0.00354261	0.888003
ENSG00000111276.9	0.00536068	0.576572
ENSG00000111344.10	-0.0129055	0.254614
ENSG00000111445.12	-0.0107353	0.532711
ENSG00000111669.13	-0.000655483	0.343419
ENSG00000111671.8	-0.0425518	0.347628
ENSG00000112137.15	0.109583	0.0789692
ENSG00000112511.16	-0.014181	0.317614
ENSG00000112514.14	-0.00155309	0.724944
ENSG00000113716.11	0.0136607	0.352272
ENSG00000113758.12	-0.00412543	0.403437
ENSG00000113763.9	-0.231981	0.38876
ENSG00000114354.11	-0.00408104	0.257378
ENSG00000115053.14	0.000416723	0.591481
ENSG00000115155.15	-0.0341146	0.810741
ENSG00000115232.12	0.0175245	0.200191
ENSG00000115275.10	-0.0248626	0.0352848
ENSG00000115297.10	-0.596821	0.113473
ENSG00000115310.16	6.34484e-06	0.996515
ENSG00000115325.12	0.0595017	0.096133
ENSG00000115657.11	0.0203073	0.570733
ENSG00000115841.18	-0.0949724	0.472599
ENSG00000116005.10	-0.00310895	0.509197
ENSG00000116161.16	0.00241063	0.762785
ENSG00000116176.6	-1.88646	0.401826
ENSG00000116221.14	-0.00533424	0.46844
ENSG00000116254.16	-1.29789	0.208663
ENSG00000116329.9	0.216748	0.0476485
ENSG00000116478.10	-0.000957128	0.803689
ENSG00000116957.11	0.00697364	0.797063
ENSG00000117308.13	-0.00516991	0.625072
ENSG00000117411.15	-0.0031415	0.415744
ENSG00000117419.13	-0.00631907	0.467019
ENSG00000118094.10	-0.430527	0.704921
ENSG00000118518.14	0.0197045	0.614738
ENSG00000118873.14	-0.00242174	0.881509
ENSG00000118997.12	0.00639718	0.979976
ENSG00000119041.9	0.0173704	0.212288
ENSG00000119396.9	0.00219454	0.632829
ENSG00000119397.15	0.00147314	0.926047
ENSG00000119408.15	0.0160189	0.199526
ENSG00000119522.14	-0.00359519	0.813527
ENSG00000119689.13	-0.0104997	0.0965406
ENSG00000119698.10	-0.0278385	0.389263
ENSG00000119915.4	0.0452177	0.722715
ENSG00000119986.6	0.00174031	0.764365
ENSG00000120333.4	0.00907584	0.770722
ENSG00000120699.11	0.0219798	0.297808
ENSG00000120784.14	-0.0218978	0.732409
ENSG00000120860.9	0.0235253	0.38175
ENSG00000120948.14	-0.00789387	0.327506
ENSG00000121053.5	-5.25302	0.0506822
ENSG00000121075.8	0.0301964	0.120068
ENSG00000121653.10	0.026944	0.360991
ENSG00000122033.13	0.00970471	0.684156
ENSG00000122034.11	0.00601811	0.314447
ENSG00000122203.13	0.000910892	0.91669
ENSG00000122674.10	0.0386304	0.571394
ENSG00000122696.11	-0.0166307	0.658252
ENSG00000122729.17	0.00949317	0.393192
ENSG00000122735.14	-0.117263	0.834098
ENSG00000122971.7	0.00823043	0.692868
ENSG00000123136.13	-0.00470947	0.404523
ENSG00000123143.11	0.00329727	0.525281
ENSG00000123146.18	0.00501084	0.27942
ENSG00000123329.16	0.041243	0.098572
ENSG00000123342.14	-0.00198214	0.877859
ENSG00000123395.13	-0.0162914	0.399648
ENSG00000123485.10	0.0026257	0.856275
ENSG00000123737.11	-0.00195667	0.921134
ENSG00000123870.10	0.0969302	0.787256
ENSG00000124151.17	-0.000591114	0.904956
ENSG00000124541.6	-0.0145904	0.17988
ENSG00000124574.13	-0.0121156	0.420986
ENSG00000124587.12	-0.00775569	0.344645
ENSG00000124593.13	-0.0460905	0.397565
ENSG00000124713.5	-1.03663	0.222683
ENSG00000124939.5	-0.489457	0.536647
ENSG00000125037.11	0.0108941	0.242309
ENSG00000125148.6	-5.32533e-05	0.879096
ENSG00000125149.10	-0.00777595	0.750172
ENSG00000125170.9	-0.00955062	0.357158
ENSG00000125257.12	0.00100347	0.95639
ENSG00000125355.14	0.0230028	0.316827
ENSG00000125520.12	-0.00232337	0.696433
ENSG00000125650.4	-0.134614	0.425026
ENSG00000125652.6	-0.00378692	0.729967
ENSG00000125741.4	-0.0240436	0.291534
ENSG00000125753.12	-0.00368798	0.566785
ENSG00000125775.13	-0.00357846	0.40744
ENSG00000126010.5	0.621746	0.119892
ENSG00000126246.8	0.187387	0.0595361
ENSG00000126247.9	-0.00204091	0.233889
ENSG00000126464.12	-0.00857595	0.370113
ENSG00000126500.3	-0.127871	0.803645
ENSG00000126603.7	0.000140573	0.99051
ENSG00000126778.8	0.0120928	0.626981
ENSG00000126895.12	0.208684	0.530923
ENSG00000127311.8	0.0498875	0.226282
ENSG00000127533.3	-0.0510795	0.501787
ENSG00000127564.15	-0.00468201	0.615693
ENSG00000127585.10	-0.0414692	0.182982
ENSG00000127948.12	-0.00301706	0.526482
ENSG00000128016.5	0.000519638	0.479505
ENSG00000128191.12	-0.0438314	0.0443742
ENSG00000128283.6	-0.0068283	0.110133
ENSG00000128322.6	-0.0766161	0.647266
ENSG00000128346.9	-0.0029743	0.971269
ENSG00000128463.11	0.00419168	0.623831
ENSG00000128482.14	-0.865808	0.129804
ENSG00000128563.12	-0.0294895	0.265404
ENSG00000128564.6	0.000296751	0.998307
ENSG00000128595.15	0.000327305	0.819336
ENSG00000128617.2	0.00655939	0.957354
ENSG00000128709.11	-0.0456657	0.356154
ENSG00000129103.16	0.00100995	0.493774
ENSG00000129195.14	-0.0195202	0.463121
ENSG00000129347.18	-0.0303064	0.0228513
ENSG00000129451.10	1.75787e-05	0.95498
ENSG00000129691.14	-0.00947626	0.246714
ENSG00000129744.2	0.967601	0.044759
ENSG00000129910.6	0.107089	0.0391453
ENSG00000129951.17	-0.96005	0.640758
ENSG00000129968.14	-0.00276059	0.880082
ENSG00000130244.11	-0.100007	0.0829387
ENSG00000130487.5	0.00113799	0.493349
ENSG00000130511.14	0.000112602	0.991814
ENSG00000130545.14	-0.0125203	0.562169
ENSG00000130584.9	0.056439	0.208253
ENSG00000130702.12	-0.00352858	0.100772
ENSG00000130706.11	-0.00303399	0.440836
ENSG00000130714.14	-0.0116121	0.659664
ENSG00000130717.11	-0.0070212	0.668467
ENSG00000130734.8	-0.0125276	0.531584
ENSG00000130748.6	-0.0291404	0.549134
ENSG00000130751.8	-0.45305	0.0564937
ENSG00000130758.6	-0.013987	0.70303
ENSG00000130811.9	-0.00304763	0.439459
ENSG00000130812.9	0.212979	0.816937
ENSG00000130813.16	-0.00279969	0.813813
ENSG00000130826.14	-0.00687474	0.180651
ENSG00000130827.6	-0.009965	0.336151
ENSG00000130830.13	0.0359071	0.0436552
ENSG00000130876.10	-1.04828	0.665475
ENSG00000130881.12	-0.0107643	0.538796
ENSG00000131149.16	0.000136802	0.989898
ENSG00000131153.7	0.00234954	0.874429
ENSG00000131188.10	-0.0363451	0.584131
ENSG00000131236.15	0.000216087	0.814028
ENSG00000131238.15	0.00303811	0.432811
ENSG00000131389.15	0.00658075	0.210922
ENSG00000131470.13	-0.0302698	0.622788
ENSG00000131584.17	-0.0112744	0.210187
ENSG00000131650.12	-0.00466142	0.612372
ENSG00000131788.14	0.00113236	0.889683
ENSG00000131899.9	-0.0226211	0.0181138
ENSG00000132153.13	0.00197617	0.863637
ENSG00000132155.10	-0.00386307	0.685865
ENSG00000132313.13	-0.0177298	0.470235
ENSG00000132388.11	-0.00987447	0.182342
ENSG00000132507.16	-0.00126446	0.115911
ENSG00000132613.13	-0.00574287	0.786928
ENSG00000132622.9	0.0192945	0.550003
ENSG00000132793.10	-0.00392769	0.813459
ENSG00000133019.10	-0.011209	0.723439
ENSG00000133055.7	0.00717844	0.000250838
ENSG00000133318.12	0.000549133	0.878999
ENSG00000133794.16	-0.0397407	0.207129
ENSG00000133805.14	0.00301599	0.71992
ENSG00000133961.18	-0.00683646	0.39596
ENSG00000134013.14	0.000790486	0.714482
ENSG00000134317.16	9.70622e-05	0.969425
ENSG00000134318.12	0.00493053	0.648614
ENSG00000134398.11	0.00267982	0.941931
ENSG00000134480.12	0.0581352	0.0234599
ENSG00000134668.11	-0.00428096	0.807358
ENSG00000134684.9	-0.00587332	0.312663
ENSG00000134697.11	-0.00865447	0.342206
ENSG00000134769.20	0.0636004	0.0124729
ENSG00000134780.8	-0.0892417	0.312614
ENSG00000135093.11	-0.0720789	0.352497
ENSG00000135144.6	0.00101508	0.984952
ENSG00000135365.14	0.00937887	0.586241
ENSG00000135414.8	-0.0537056	0.240965
ENSG00000135451.11	-0.0159844	0.385879
ENSG00000135597.17	-0.0155306	0.332601
ENSG00000135678.10	0.0109192	0.30729
ENSG00000135749.17	-0.0449558	0.228324
ENSG00000135778.10	-0.00893351	0.611285
ENSG00000135945.8	-0.00821414	0.665711
ENSG00000136048.12	0.0161727	0.0359878
ENSG00000136059.13	-0.00913572	0.81986
ENSG00000136478.6	-0.00563185	0.559843
ENSG00000136854.16	-0.00314815	0.75758
ENSG00000136877.13	0.000598259	0.913247
ENSG00000136881.10	2.75185	0.107409
ENSG00000136930.11	0.000466251	0.831872
ENSG00000137070.16	-0.0141586	0.627743
ENSG00000137154.11	-4.08072e-05	0.864356
ENSG00000137200.11	-0.0016589	0.859607
ENSG00000137267.5	-0.00131354	0.540313
ENSG00000137274.11	-0.0203925	0.727814
ENSG00000137563.10	0.002656	0.0486424
ENSG00000137575.10	0.00612706	0.0916807
ENSG00000137825.9	-0.193228	0.125649
ENSG00000137841.10	0.0618434	0.0194434
ENSG00000137843.10	-0.163831	0.395675
ENSG00000137877.9	-0.0184731	0.682524
ENSG00000138061.10	-0.00332351	0.654054
ENSG00000138073.12	0.00585317	0.242636
ENSG00000138100.12	0.0364251	8.32001e-05
ENSG00000138193.13	-0.0205035	0.591344
ENSG00000138794.8	0.0118079	0.800891
ENSG00000138834.11	-0.00561273	0.555522
ENSG00000139044.9	-0.00594485	0.120195
ENSG00000139540.10	0.704245	0.1736
ENSG00000139645.9	-0.00256652	0.742556
ENSG00000139835.12	-0.0145293	0.547591
ENSG00000140093.8	-0.655922	0.415299
ENSG00000140104.12	-0.0724802	0.102918
ENSG00000140199.10	-0.000650816	0.907335
ENSG00000140854.11	-0.0121985	0.486765
ENSG00000140859.14	-0.00652009	0.208188
ENSG00000140876.10	-0.0389536	0.871968
ENSG00000140931.18	0.00630787	0.46151
ENSG00000140939.13	-0.00316365	0.831293
ENSG00000140990.13	-0.00657025	0.323859
ENSG00000141068.12	-0.00464127	0.678494
ENSG00000141179.12	0.0333892	0.204655
ENSG00000141219.14	-0.0275717	0.464496
ENSG00000141349.7	0.00744357	0.384273
ENSG00000141401.10	-0.00434846	0.129621
ENSG00000141447.15	0.0125328	0.321421
ENSG00000141503.14	-0.00257606	0.218566
ENSG00000141522.10	-0.00236583	0.255388
ENSG00000141564.12	-0.0110072	0.294966
ENSG00000141744.3	0.188967	0.232025
ENSG00000141934.8	-0.00236684	0.686232
ENSG00000142186.15	-0.00104923	0.811182
ENSG00000142197.11	-0.00118836	0.924007
ENSG00000142208.14	-0.00871949	0.0771408
ENSG00000142632.15	-0.0147923	0.133813
ENSG00000143157.10	-0.0171879	0.177651
ENSG00000143198.11	0.00994609	0.171738
ENSG00000143318.11	0.0160135	0.00160142
ENSG00000143340.6	-0.177333	0.604608
ENSG00000143382.12	0.0048173	0.33296
ENSG00000143442.20	-0.012066	0.310106
ENSG00000143494.14	-0.00187796	0.979694
ENSG00000143552.8	0.859292	0.517579
ENSG00000143553.9	0.00405395	0.863561
ENSG00000143621.15	-0.00405356	0.289533
ENSG00000143748.16	0.00142241	0.973008
ENSG00000143819.11	-0.000636754	0.830153
ENSG00000143845.13	-0.00615225	0.557697
ENSG00000143862.6	-0.00623752	0.683725
ENSG00000143952.18	-0.0162745	0.52795
ENSG00000143977.12	-0.00508506	0.618733
ENSG00000143994.12	0.183578	0.120933
ENSG00000144045.12	-0.107912	0.0781053
ENSG00000144395.16	-0.0602268	0.653266
ENSG00000144596.10	0.0959412	0.176395
ENSG00000144597.12	-0.00216664	0.894404
ENSG00000144746.6	0.0113865	0.0225529
ENSG00000144857.13	-0.00396916	0.752212
ENSG00000145002.11	-5.17242	0.217028
ENSG00000145244.10	0.019373	0.735875
ENSG00000145246.12	-0.00155024	0.77505
ENSG00000145386.8	-0.00613559	0.542737
ENSG00000145416.12	0.0648067	0.0138593
ENSG00000145715.13	0.0127329	0.281116
ENSG00000145721.10	0.269588	0.240415
ENSG00000145901.13	0.00105244	0.74872
ENSG00000146223.13	-0.00512091	0.337733
ENSG00000146426.16	0.0736387	0.333296
ENSG00000146477.5	-0.00787653	0.519888
ENSG00000146556.13	-0.0767109	0.672222
ENSG00000146830.9	-0.0112547	0.315583
ENSG00000147119.3	-0.0174273	0.64068
ENSG00000147465.10	-0.0213932	0.504763
ENSG00000147573.15	0.175218	0.00737866
ENSG00000147912.11	0.0048047	0.941521
ENSG00000148082.8	0.0399622	0.0561899
ENSG00000148204.10	0.00691465	0.484596
ENSG00000148337.18	-0.00248014	0.710565
ENSG00000148358.18	-0.00134242	0.747761
ENSG00000148362.9	-0.00429965	0.649171
ENSG00000148600.13	0.00280997	0.588219
ENSG00000148702.13	0.241615	0.292632
ENSG00000148824.17	-0.0609408	0.529617
ENSG00000148925.9	0.00126943	0.924736
ENSG00000149179.12	0.0283129	0.140766
ENSG00000149182.13	0.00220851	0.666074
ENSG00000149243.14	-0.0973292	0.251903
ENSG00000149273.13	-8.46895e-05	0.75392
ENSG00000149328.13	0.00133557	0.94298
ENSG00000149346.13	-0.029829	0.51442
ENSG00000149489.7	-0.14716	0.332924
ENSG00000149541.8	-0.00378456	0.673465
ENSG00000149782.10	-0.00296998	0.48799
ENSG00000149922.9	-0.0973294	0.108296
ENSG00000149923.12	-0.00567676	0.23752
ENSG00000149929.14	-0.0424963	0.154412
ENSG00000149930.16	-0.0213965	0.114697
ENSG00000149968.10	0.000171808	0.864312
ENSG00000149970.13	-0.178809	0.582425
ENSG00000150281.6	-0.102688	0.13243
ENSG00000151117.7	0.00199754	0.861182
ENSG00000151303.11	-1.77267	0.351421
ENSG00000151364.14	0.00999926	0.490746
ENSG00000151365.2	1.80555	0.152032
ENSG00000151366.11	-0.00192172	0.711881
ENSG00000152382.5	0.00325365	0.957605
ENSG00000153162.8	0.0549974	0.181071
ENSG00000153944.9	-0.00109221	0.912332
ENSG00000154040.19	0.043259	0.0502179
ENSG00000154146.11	-0.0262069	0.733809
ENSG00000154175.15	0.00504942	0.506503
ENSG00000154222.13	-0.0226942	0.183651
ENSG00000154639.17	-0.00401361	0.415649
ENSG00000154640.13	-0.0160029	0.176781
ENSG00000154864.10	-0.0130552	0.674679
ENSG00000154945.6	0.00452191	0.781849
ENSG00000155026.15	1.31635	0.797067
ENSG00000155252.13	0.00221553	0.817034
ENSG00000155363.17	0.00542296	0.325813
ENSG00000155366.15	0.000328481	0.871979
ENSG00000155506.15	-0.000667634	0.78947
ENSG00000155749.11	0.0687695	0.962286
ENSG00000155850.7	0.0078912	0.398637
ENSG00000155974.10	-0.0148879	0.699789
ENSG00000156381.7	-0.0312069	0.0470614
ENSG00000156642.15	0.00388363	0.304704
ENSG00000157017.14	1.07961	0.121238
ENSG00000157020.16	-0.00385507	0.556153
ENSG00000157077.13	-0.0187325	0.196384
ENSG00000157111.11	0.0223801	0.446284
ENSG00000157119.11	0.0666007	0.00010647
ENSG00000157216.14	-0.0112899	0.183516
ENSG00000157368.9	-0.0608661	0.208425
ENSG00000157593.15	-0.00204926	0.826471
ENSG00000157833.11	-0.0610503	0.14276
ENSG00000157851.15	0.0224824	0.813574
ENSG00000157856.9	0.989793	0.00924979
ENSG00000158008.8	0.242916	0.00582188
ENSG00000158014.13	0.34127	0.143512
ENSG00000158158.10	0.00159392	0.897071
ENSG00000158417.9	-0.00244514	0.43687
ENSG00000158483.14	0.000642457	0.974939
ENSG00000158526.7	-0.00540524	0.678937
ENSG00000158552.11	-0.00572648	0.671569
ENSG00000158578.17	-1.02585	0.605768
ENSG00000158623.13	-0.00784743	0.568739
ENSG00000158792.14	-0.00228835	0.939125
ENSG00000158828.5	0.00575979	0.586012
ENSG00000159023.17	-0.00279454	0.841626
ENSG00000159184.7	-0.0386118	0.423651
ENSG00000159247.11	-0.0731716	0.318033
ENSG00000159263.14	-0.000446519	0.937295
ENSG00000159267.13	-0.0170189	0.441442
ENSG00000159374.16	-0.0317522	0.577301
ENSG00000159377.9	-0.000735666	0.649688
ENSG00000159792.8	-0.0160049	0.306191
ENSG00000159842.13	-0.00504131	0.320129
ENSG00000160050.13	-0.0329459	0.411449
ENSG00000160111.11	-0.262894	0.0945878
ENSG00000160172.9	0.0262172	0.784656
ENSG00000160214.11	-0.0161678	0.120571
ENSG00000160325.13	-0.0037084	0.800261
ENSG00000160326.12	0.0310202	0.0862808
ENSG00000160404.16	0.0212812	0.414969
ENSG00000160469.15	0.0110171	0.899092
ENSG00000160781.14	-0.0589214	0.404513
ENSG00000160818.15	-0.00312733	0.809226
ENSG00000160883.9	0.0423718	0.102113
ENSG00000160951.3	-1.2907	0.263885
ENSG00000161082.11	-1.28294	0.316421
ENSG00000161091.11	0.0025715	0.589543
ENSG00000161281.9	0.0261886	0.00373781
ENSG00000161395.11	-0.0358167	0.142022
ENSG00000161682.13	-0.179719	0.124038
ENSG00000161800.11	-0.00575761	0.463424
ENSG00000162006.8	-0.451121	0.544741
ENSG00000162066.13	-0.00562995	0.775567
ENSG00000162078.10	-0.00774553	0.602235
ENSG00000162241.11	-0.0770145	0.40013
ENSG00000162434.10	0.000170701	0.953357
ENSG00000162437.13	-0.0262372	0.306331
ENSG00000162522.9	-0.00367787	0.0910348
ENSG00000162572.18	-0.0187988	0.177253
ENSG00000162728.4	0.24863	0.166157
ENSG00000162729.12	-0.00254787	0.631576
ENSG00000162885.11	-0.033575	0.261388
ENSG00000162892.14	0.000110707	0.975532
ENSG00000162894.10	0.0165571	0.57789
ENSG00000162976.11	0.026112	0.392426
ENSG00000163154.5	0.13063	0.00474026
ENSG00000163155.10	-0.170064	0.0574268
ENSG00000163156.10	-0.0133902	0.446725
ENSG00000163159.10	-0.0136395	0.402947
ENSG00000163249.8	-0.00401793	0.725868
ENSG00000163251.3	7.58268e-05	0.995564
ENSG00000163380.14	0.0368139	0.000167709
ENSG00000163382.10	-0.00360249	0.516624
ENSG00000163485.14	0.0622264	0.499357
ENSG00000163499.10	-0.0424335	0.798604
ENSG00000163697.15	0.00897076	0.347544
ENSG00000163703.16	0.0429514	0.0594819
ENSG00000163704.10	-0.100479	0.552724
ENSG00000163794.6	-0.260142	0.445094
ENSG00000163806.14	-1.02504	0.152666
ENSG00000163879.10	0.0442929	0.42262
ENSG00000163938.15	0.00906412	0.269568
ENSG00000164054.14	0.000225249	0.900193
ENSG00000164062.11	0.000826109	0.843809
ENSG00000164070.10	-0.0045578	0.351858
ENSG00000164099.3	-0.027359	0.030336
ENSG00000164296.6	0.0197491	0.912278
ENSG00000164597.12	0.000485226	0.969779
ENSG00000164649.18	-0.005806	0.715728
ENSG00000164663.12	-0.0722317	0.272549
ENSG00000164674.14	-0.0166101	0.615397
ENSG00000164729.7	-0.925973	0.525507
ENSG00000164742.13	-0.0247868	0.598924
ENSG00000164776.8	0.123708	0.00257714
ENSG00000164808.15	0.00167929	0.88103
ENSG00000164855.14	0.000466443	0.915376
ENSG00000164889.11	0.00672603	0.395109
ENSG00000164896.18	-0.00320576	0.635587
ENSG00000164902.12	0.0183751	0.47416
ENSG00000164932.11	0.00307433	0.438261
ENSG00000165125.16	0.0428922	0.30509
ENSG00000165458.12	0.00446788	0.434562
ENSG00000165905.15	0.00363899	0.214171
ENSG00000165983.13	-0.015598	0.733269
ENSG00000165985.9	0.164445	0.745315
ENSG00000166004.13	-0.0122612	0.796683
ENSG00000166171.11	-0.00597222	0.804119
ENSG00000166311.8	-0.00394452	0.798002
ENSG00000166313.17	0.00382218	0.882878
ENSG00000166428.11	0.0346613	0.180038
ENSG00000166507.15	0.322693	0.341053
ENSG00000166575.15	0.0492963	0.261717
ENSG00000166763.7	-1.72346	0.194589
ENSG00000166816.12	-0.0337669	0.455292
ENSG00000166851.13	-0.00107133	0.879421
ENSG00000166856.2	0.757741	0.501739
ENSG00000166860.2	-0.0671195	0.206213
ENSG00000166960.15	0.288368	0.853924
ENSG00000166971.15	-0.0204919	0.518876
ENSG00000167094.14	0.580439	0.365613
ENSG00000167105.6	-0.0368317	0.521127
ENSG00000167106.10	-0.0016162	0.639933
ENSG00000167118.9	0.00429977	0.48469
ENSG00000167220.10	-0.00715761	0.861535
ENSG00000167280.15	-0.0190586	0.454793
ENSG00000167281.17	-2.2424	0.263922
ENSG00000167311.12	-0.0988628	0.709785
ENSG00000167460.13	0.000255657	0.679618
ENSG00000167468.15	-1.56597e-06	0.999319
ENSG00000167513.7	-0.00864065	0.379864
ENSG00000167535.6	-0.0340728	0.201297
ENSG00000167543.14	-0.0105232	0.394386
ENSG00000167549.17	0.0157153	0.0300802
ENSG00000167644.10	-0.00239868	0.402584
ENSG00000167645.15	-0.0136062	0.341562
ENSG00000167670.14	-0.00528271	0.594222
ENSG00000167671.10	-0.00179641	0.710682
ENSG00000167748.9	-0.0176585	0.743732
ENSG00000167771.5	-0.00499229	0.906602
ENSG00000167778.7	-0.00811826	0.263899
ENSG00000167863.10	-0.00294035	0.480976
ENSG00000167889.11	0.0362905	0.32266
ENSG00000167930.14	-0.0107203	0.224424
ENSG00000167967.14	-0.0263726	0.266256
ENSG00000167968.11	-0.308993	0.306685
ENSG00000167969.11	-0.0117632	0.230648
ENSG00000167984.15	0.0476186	0.230281
ENSG00000168056.13	-0.00169922	0.68991
ENSG00000168060.13	0.198203	0.0410335
ENSG00000168061.12	-0.0156171	0.417718
ENSG00000168234.11	-0.0199551	0.403286
ENSG00000168256.16	-0.0148534	0.312414
ENSG00000168268.9	0.00132065	0.766336
ENSG00000168350.7	-0.0197521	0.364696
ENSG00000168427.8	0.129343	0.000773162
ENSG00000168477.16	0.00188769	0.776658
ENSG00000168743.11	-0.00398044	0.321092
ENSG00000168802.11	-0.00703354	0.343038
ENSG00000168827.13	0.000481306	0.958671
ENSG00000168913.6	-1.56646	0.0801384
ENSG00000168995.12	0.365891	0.0151484
ENSG00000169188.4	-0.0150665	0.288893
ENSG00000169258.6	-0.0406148	0.0394958
ENSG00000169372.11	0.0363943	0.617728
ENSG00000169583.12	0.00020608	0.951952
ENSG00000169641.12	0.000481336	0.922693
ENSG00000169692.11	-0.00029618	0.941016
ENSG00000169718.16	-0.00598999	0.286087
ENSG00000169727.11	-0.00406011	0.501896
ENSG00000169764.13	0.00441016	0.459581
ENSG00000169885.8	0.0559281	0.873231
ENSG00000169962.4	0.030662	0.532826
ENSG00000169972.10	-0.0334155	0.245294
ENSG00000169994.17	-0.0161845	0.495015
ENSG00000170035.14	-0.00576792	0.600285
ENSG00000170049.8	-0.306881	0.192501
ENSG00000170075.8	-0.134099	0.500309
ENSG00000170085.16	-0.0517305	0.267359
ENSG00000170142.10	0.0087365	0.290312
ENSG00000170271.9	-0.0361845	0.368734
ENSG00000170291.13	-0.0238451	0.243998
ENSG00000170382.10	-0.0166669	0.771849
ENSG00000170423.11	-0.000230007	0.846236
ENSG00000170473.15	-0.00798042	0.577579
ENSG00000170684.7	-0.0442902	0.601494
ENSG00000170776.18	-0.00121689	0.763424
ENSG00000170779.10	-0.016541	0.0896472
ENSG00000171103.9	0.0376154	0.557348
ENSG00000171262.10	0.00418757	0.850256
ENSG00000171462.13	-0.0109224	0.396794
ENSG00000171603.15	-0.00161238	0.0754859
ENSG00000171608.14	-0.00382262	0.562123
ENSG00000171777.14	0.319441	0.0178013
ENSG00000171817.15	-0.0937752	0.804537
ENSG00000171840.10	0.00149067	0.973678
ENSG00000171889.3	-0.0392227	0.505372
ENSG00000172059.9	-0.00544069	0.69195
ENSG00000172247.3	-0.408392	0.426394
ENSG00000172346.13	0.146853	0.0664335
ENSG00000172354.8	-0.00156798	0.418172
ENSG00000172367.14	-2.43027	0.389162
ENSG00000172460.13	-0.0440957	0.903773
ENSG00000172476.3	-0.822878	0.232428
ENSG00000172500.11	-0.0029676	0.674158
ENSG00000172531.13	-0.000518967	0.745413
ENSG00000172543.6	-0.0110809	0.642748
ENSG00000172575.10	0.0117647	0.119779
ENSG00000172613.6	-0.0283668	0.232181
ENSG00000172650.11	-0.443192	0.847156
ENSG00000172725.12	-0.00049293	0.906268
ENSG00000172889.14	-0.00487706	0.625605
ENSG00000172935.8	0.0234312	0.387024
ENSG00000173011.11	-0.00148018	0.939109
ENSG00000173137.10	-0.00500562	0.7979
ENSG00000173145.10	0.0257638	0.217401
ENSG00000173338.11	-0.0173367	0.45088
ENSG00000173418.10	0.000977333	0.800741
ENSG00000173442.10	0.0006992	0.799042
ENSG00000173482.15	0.00592251	0.664796
ENSG00000173846.11	0.00599188	0.540644
ENSG00000173947.12	0.482665	0.0296122
ENSG00000174243.8	-0.00840678	0.320855
ENSG00000174292.11	-0.010489	0.528797
ENSG00000174521.7	-1.02266	0.409131
ENSG00000174606.11	0.0115933	0.729567
ENSG00000175130.6	-0.00299921	0.31148
ENSG00000175206.9	0.351982	0.89585
ENSG00000175592.7	-0.0021797	0.402507
ENSG00000175602.3	-0.00666829	0.396283
ENSG00000175634.13	-0.0016161	0.680281
ENSG00000176125.4	-0.299484	0.190862
ENSG00000176728.6	-0.359843	0.124185
ENSG00000176871.7	-0.000766012	0.89665
ENSG00000176884.13	-0.205256	0.337791
ENSG00000177045.7	-0.049125	0.289067
ENSG00000177191.2	-0.0239205	0.261076
ENSG00000177370.4	-0.0449626	0.0999618
ENSG00000177485.6	-0.00834627	0.502012
ENSG00000177548.11	-0.0339722	0.130869
ENSG00000177628.14	-0.0135979	0.327911
ENSG00000177731.14	-0.00486581	0.158647
ENSG00000177791.11	0.0115632	0.000314802
ENSG00000177839.6	-0.104527	0.252327
ENSG00000177954.10	-9.70247e-05	0.892214
ENSG00000178028.12	-0.00999341	0.438436
ENSG00000178149.15	0.00860934	0.817809
ENSG00000178252.16	0.00546347	0.3905
ENSG00000178297.11	-1.39397	0.140216
ENSG00000178342.4	0.867993	0.24261
ENSG00000178460.16	0.0362733	0.880081
ENSG00000178814.14	0.00385773	0.723331
ENSG00000178821.11	0.134501	0.110344
ENSG00000178947.8	-0.176395	0.1204
ENSG00000179051.12	-0.00408789	0.116977
ENSG00000179057.12	-0.0784116	0.529604
ENSG00000179222.16	-0.00137165	0.517872
ENSG00000179262.8	-0.00258253	0.698027
ENSG00000179270.6	0.35329	0.484439
ENSG00000179271.2	-0.00249061	0.617852
ENSG00000179299.15	-0.120153	0.265549
ENSG00000179361.16	-0.0342017	0.519519
ENSG00000179564.3	3.33497	0.00336137
ENSG00000179832.16	-0.000196974	0.986226
ENSG00000179886.5	-0.0455635	0.0726467
ENSG00000180061.8	0.177884	0.133089
ENSG00000180098.8	-0.0239168	0.427652
ENSG00000180279.5	-0.812189	0.417391
ENSG00000180385.7	-0.147913	0.427208
ENSG00000180448.9	0.00980636	0.241115
ENSG00000180900.15	0.00132084	0.655739
ENSG00000180919.3	3.42941	0.581436
ENSG00000180929.5	-2.10823	0.190176
ENSG00000181856.13	0.0922038	0.00231775
ENSG00000181885.17	-0.00307788	0.352833
ENSG00000182048.10	-0.7818	0.76247
ENSG00000182179.9	0.00671635	0.280394
ENSG00000182196.12	-0.147934	0.415003
ENSG00000182199.9	-0.00483253	0.259643
ENSG00000182484.13	-0.0538906	0.434298
ENSG00000182518.12	-0.0624385	0.271065
ENSG00000182578.12	0.00813649	0.00165572
ENSG00000182759.3	0.0140335	0.829944
ENSG00000182796.11	-0.0493706	0.29996
ENSG00000182866.15	0.0153596	0.352662
ENSG00000183020.12	0.010386	0.278779
ENSG00000183060.14	-0.0234377	0.542517
ENSG00000183066.13	-0.661658	0.275032
ENSG00000183426.14	-0.0225388	0.877812
ENSG00000183723.11	-0.00652664	0.662056
ENSG00000183773.14	-0.329633	0.215472
ENSG00000183793.12	-0.387184	0.372523
ENSG00000183798.4	-0.477302	0.157945
ENSG00000183889.11	-0.377669	0.647344
ENSG00000183963.17	-0.00253524	0.43299
ENSG00000184058.11	-0.0270921	0.137486
ENSG00000184209.14	-0.0081164	0.737143
ENSG00000184281.13	-0.00280924	0.743856
ENSG00000184343.9	0.111742	0.0001158
ENSG00000184363.8	-2.75852e-05	0.968065
ENSG00000184481.15	-0.00556015	0.827829
ENSG00000184575.10	0.0004387	0.835423
ENSG00000184697.6	-0.2642	0.576811
ENSG00000184709.7	-0.205527	0.6139
ENSG00000184860.8	-0.00297236	0.851613
ENSG00000184908.16	-0.769046	0.422538
ENSG00000184956.14	-0.00123687	0.71
ENSG00000184979.9	-0.000578896	0.963198
ENSG00000184990.11	-0.00962724	0.276568
ENSG00000185038.13	0.0163649	0.473387
ENSG00000185133.12	-0.00288055	0.958017
ENSG00000185187.11	-0.012178	0.492535
ENSG00000185324.20	-0.00969208	0.468578
ENSG00000185340.14	-0.012629	0.105997
ENSG00000185507.18	0.00286658	0.293278
ENSG00000185519.8	-0.0519369	0.747508
ENSG00000185567.6	-0.0010017	0.127639
ENSG00000185614.4	-0.0556613	0.203611
ENSG00000185615.14	-0.0600851	0.427439
ENSG00000185633.9	-0.00427747	0.0136443
ENSG00000185838.12	-0.0823246	0.0913359
ENSG00000185864.15	-0.228156	0.41847
ENSG00000185896.10	-0.000481042	0.728732
ENSG00000185915.5	0.730173	0.0261725
ENSG00000186153.15	-0.0664655	0.228481
ENSG00000186187.10	-0.0360395	0.110223
ENSG00000186193.8	-0.00643047	0.541127
ENSG00000186207.4	-0.212803	0.651906
ENSG00000186364.10	-0.165363	0.533912
ENSG00000186471.11	-0.301091	0.840506
ENSG00000186625.12	-0.00344467	0.928121
ENSG00000186897.4	-0.0452225	0.814871
ENSG00000186951.15	-0.0192255	0.190352
ENSG00000187024.12	0.617242	0.553207
ENSG00000187091.12	-0.000994737	0.850161
ENSG00000187325.4	0.00338535	0.820765
ENSG00000187479.5	0.00302299	0.660675
ENSG00000187583.9	0.00652444	0.709118
ENSG00000187595.13	0.0228164	0.657855
ENSG00000187634.9	-0.00831384	0.77212
ENSG00000187642.8	0.000889638	0.974029
ENSG00000187682.1	-2.91223	0.561336
ENSG00000187838.15	-0.147072	0.652194
ENSG00000187848.11	-1.52404	0.645741
ENSG00000187959.8	0.286074	0.715981
ENSG00000188002.9	-0.0117076	0.831817
ENSG00000188056.10	5.03955	4.7468e-05
ENSG00000188070.9	-0.009527	0.695487
ENSG00000188092.13	-0.0401739	0.833643
ENSG00000188163.7	-3.85041	0.424914
ENSG00000188186.9	-0.00404051	0.474728
ENSG00000188229.5	-0.000567297	0.436299
ENSG00000188269.7	-0.191173	0.819184
ENSG00000188396.3	-0.0798191	0.976711
ENSG00000188452.12	0.0657601	0.0245517
ENSG00000188486.3	0.00258305	0.628797
ENSG00000188505.4	-0.000829881	0.529192
ENSG00000188525.3	-9.25478	0.151994
ENSG00000188613.6	0.0556273	0.244152
ENSG00000188779.9	-1.20874	0.218309
ENSG00000188786.9	-0.0031433	0.790603
ENSG00000188976.9	-0.00283976	0.523051
ENSG00000189046.9	-0.0585784	0.0913201
ENSG00000189077.9	0.00466383	0.824657
ENSG00000189269.11	-2.19852	0.30864
ENSG00000189350.11	0.453671	0.0154884
ENSG00000189409.11	1.10199	0.46755
ENSG00000196110.6	-0.00379976	0.967022
ENSG00000196123.11	-0.0255182	0.560051
ENSG00000196169.13	0.556619	0.00605669
ENSG00000196187.10	-0.021413	0.275111
ENSG00000196296.12	0.00320202	0.00389889
ENSG00000196305.16	0.00132126	0.692035
ENSG00000196396.8	0.000171535	0.973871
ENSG00000196405.11	-0.00407863	0.595296
ENSG00000196436.8	-0.00267647	0.987552
ENSG00000196455.6	-0.00616239	0.591686
ENSG00000196497.14	-0.0892012	0.198704
ENSG00000196511.12	0.0878841	0.415364
ENSG00000196517.10	-0.00301298	0.68901
ENSG00000196557.9	-0.0258111	0.464469
ENSG00000196562.13	0.00103085	0.147745
ENSG00000196588.13	-0.0109875	0.198527
ENSG00000196666.4	1.69307	0.122387
ENSG00000196696.11	-0.0553009	0.700068
ENSG00000196700.6	-0.0251046	0.137511
ENSG00000196878.11	-0.00024164	0.429246
ENSG00000196950.12	0.0063637	0.716717
ENSG00000196976.6	-0.0226424	0.251543
ENSG00000196979.1	0.598128	0.0609421
ENSG00000197226.11	-0.00124367	0.795823
ENSG00000197586.11	0.00348536	0.577641
ENSG00000197614.9	0.00299068	0.276188
ENSG00000197629.5	0.00902049	0.0177455
ENSG00000197746.12	0.000297259	0.483301
ENSG00000197753.8	-2.84045	0.302106
ENSG00000197785.12	-0.0100433	0.332391
ENSG00000197885.9	0.17582	0.107712
ENSG00000197893.12	0.00365397	0.00143664
ENSG00000197956.8	-0.000287408	0.385326
ENSG00000197982.13	-0.00840591	0.420771
ENSG00000197989.12	-0.0207382	0.383999
ENSG00000197993.6	0.0052211	0.691534
ENSG00000198026.7	-0.0421278	0.112351
ENSG00000198089.13	-0.0103534	0.720967
ENSG00000198208.10	0.0365072	0.637527
ENSG00000198231.11	-0.0118273	0.248562
ENSG00000198252.10	-0.00600217	0.777653
ENSG00000198467.12	0.00165389	0.00269368
ENSG00000198517.8	-0.00200878	0.817213
ENSG00000198643.5	0.00138534	0.868948
ENSG00000198646.12	-0.0146908	0.0827998
ENSG00000198720.11	-0.00874093	0.732025
ENSG00000198832.9	-0.00522	0.401247
ENSG00000198853.10	0.00388369	0.778634
ENSG00000198931.9	-0.00238243	0.507143
ENSG00000198937.8	-0.00845031	0.68004
ENSG00000198944.5	-0.478973	0.348335
ENSG00000198951.10	0.00195657	0.862319
ENSG00000202343.1	1.30562	0.56723
ENSG00000202533.1	-0.455965	0.856753
ENSG00000203667.8	0.0896803	0.187925
ENSG00000203734.10	-0.490883	0.674735
ENSG00000203772.7	0.00112152	0.991998
ENSG00000203804.4	0.212008	0.816111
ENSG00000204019.4	-0.0932984	0.645028
ENSG00000204033.8	0.480932	0.590884
ENSG00000204084.11	0.0349938	0.417271
ENSG00000204165.5	0.783325	0.372033
ENSG00000204172.10	0.110348	0.526534
ENSG00000204290.9	-0.294221	0.921702
ENSG00000204396.9	-0.0865782	0.49428
ENSG00000204420.7	-0.0263355	0.884213
ENSG00000204421.2	-0.00233046	0.537169
ENSG00000204475.8	0.277795	0.528677
ENSG00000204482.9	0.0498154	0.00831258
ENSG00000204560.8	-0.0149362	0.379797
ENSG00000204564.10	-0.0245724	0.557201
ENSG00000204618.7	-0.00288813	0.74504
ENSG00000204619.6	-0.0104812	0.367267
ENSG00000204644.8	0.0409337	0.614768
ENSG00000204710.2	-0.180502	0.256401
ENSG00000204791.7	-0.126906	0.523303
ENSG00000205090.7	-0.419589	0.432065
ENSG00000205643.9	-0.0655974	0.370857
ENSG00000205702.9	-0.432305	0.336408
ENSG00000205744.8	0.0186263	0.433073
ENSG00000206384.9	0.124461	0.0118699
ENSG00000206530.7	-0.0233698	0.649318
ENSG00000206561.11	0.661883	0.00116623
ENSG00000206567.8	-0.33114	0.344532
ENSG00000207563.1	3.27902	0.259609
ENSG00000207721.1	-0.520262	0.862723
ENSG00000207864.2	1.37784	0.308096
ENSG00000210195.2	-0.294972	0.575053
ENSG00000210196.2	-0.00544694	0.681781
ENSG00000211445.10	0.00207668	0.243129
ENSG00000211450.8	0.00209148	0.680001
ENSG00000211584.12	-0.0303066	0.0683126
ENSG00000213071.9	-0.172685	0.67926
ENSG00000213113.3	-14.1528	0.0735261
ENSG00000213590.2	-0.0709291	0.916504
ENSG00000213694.3	0.0160556	0.0823036
ENSG00000213722.7	0.000671681	0.935947
ENSG00000213937.3	0.0243655	0.921962
ENSG00000214595.10	-0.0808565	0.300735
ENSG00000214655.9	-0.00476633	0.620912
ENSG00000214706.9	0.00358051	0.721361
ENSG00000214733.7	-1.093	0.259668
ENSG00000214765.7	0.0347435	0.737906
ENSG00000214860.4	-0.250073	0.29819
ENSG00000214867.3	-0.206477	0.902388
ENSG00000215187.8	0.247503	0.718623
ENSG00000215458.7	-0.085763	0.123025
ENSG00000215859.7	1.08101	0.36972
ENSG00000215914.4	-0.104793	0.94231
ENSG00000217442.3	-1.68017	0.169705
ENSG00000218537.1	-0.652147	0.160804
ENSG00000219433.2	-5.58759	0.202559
ENSG00000219700.1	-0.676001	0.883286
ENSG00000220848.4	-0.405766	0.328207
ENSG00000221539.1	-0.720062	0.48681
ENSG00000221821.3	-0.209456	0.0828229
ENSG00000221869.4	-0.00546068	0.242398
ENSG00000223403.3	-0.222512	0.800098
ENSG00000223572.8	-0.0390171	0.218587
ENSG00000223705.8	-0.0453255	0.460735
ENSG00000223764.2	-0.0215758	0.756976
ENSG00000223802.6	0.0384295	0.826226
ENSG00000224066.1	1.06035	0.74222
ENSG00000224712.9	-3.19518	0.0992803
ENSG00000224961.1	-0.00097101	0.996951
ENSG00000224976.2	-0.731067	0.797556
ENSG00000225031.1	-0.0643556	0.710053
ENSG00000225419.1	-1.44372	0.678166
ENSG00000225526.4	0.0217986	0.909966
ENSG00000225531.1	1.82324	0.513204
ENSG00000225532.1	-1.25099	0.468984
ENSG00000225840.2	-0.877322	0.255084
ENSG00000225889.6	0.0182585	0.912198
ENSG00000225969.1	-0.41922	0.440366
ENSG00000226054.2	0.173602	0.549639
ENSG00000226055.2	-3.26308	0.206759
ENSG00000226686.6	-0.14292	0.731386
ENSG00000226943.3	-0.0548752	0.965587
ENSG00000226950.5	0.00205253	0.854687
ENSG00000227039.5	0.0582153	0.680597
ENSG00000227066.1	0.0465411	0.783654
ENSG00000227070.1	-2.94948	0.382857
ENSG00000227218.6	-0.0212898	0.943825
ENSG00000227473.1	-0.410063	0.329844
ENSG00000227620.4	-1.06279	0.597276
ENSG00000227632.2	-0.325314	0.752568
ENSG00000227683.1	-0.445522	0.624919
ENSG00000227741.1	-0.819257	0.620668
ENSG00000227802.1	1.33597	0.293059
ENSG00000228071.4	0.129108	0.804829
ENSG00000228278.3	0.409369	0.747767
ENSG00000228474.4	-0.00386199	0.422483
ENSG00000228727.7	-1.72839	0.140797
ENSG00000228962.1	0.380378	0.626061
ENSG00000229122.1	-1.95642	0.335097
ENSG00000229720.1	0.162057	0.840497
ENSG00000229939.1	0.65635	0.319541
ENSG00000229980.4	0.36971	0.467929
ENSG00000230170.1	-1.66718	0.740827
ENSG00000230262.5	-1.96107	0.498647
ENSG00000230929.5	3.27485	0.111784
ENSG00000231177.4	0.446901	0.421826
ENSG00000231672.5	-0.0394283	0.733402
ENSG00000231760.4	-0.133948	0.605314
ENSG00000231852.5	1.02378	0.0165381
ENSG00000232218.1	2.28422	0.421875
ENSG00000232677.5	-0.0206812	0.310154
ENSG00000232742.3	1.62545	0.467864
ENSG00000233024.6	-5.98589	0.253964
ENSG00000233101.9	0.319324	0.272309
ENSG00000233330.1	-1.99933	0.254419
ENSG00000233337.1	0.00403976	0.99797
ENSG00000233381.3	-0.919113	0.727809
ENSG00000233436.6	-2.51992	0.519967
ENSG00000233622.1	-0.236611	0.454855
ENSG00000233750.3	1.71333	0.392876
ENSG00000233885.6	-0.111987	0.786494
ENSG00000234160.1	-0.0589427	0.762159
ENSG00000234226.5	-15.6726	0.0892457
ENSG00000234290.2	0.106341	0.603777
ENSG00000234354.3	0.034359	0.472944
ENSG00000234405.1	-1.51631	0.549044
ENSG00000234409.6	-0.0457862	0.956079
ENSG00000234769.7	-0.750843	0.325786
ENSG00000234776.3	-1.48209	0.589795
ENSG00000235173.5	-0.0208526	0.217035
ENSG00000235194.7	-0.102941	0.197789
ENSG00000235663.1	-1.70233	0.584665
ENSG00000235821.1	-0.442674	0.793694
ENSG00000235961.5	0.020746	0.813759
ENSG00000235979.7	-0.299067	0.66065
ENSG00000236194.3	-10.9073	0.12879
ENSG00000236397.3	-0.0863686	0.801056
ENSG00000236675.1	-0.115894	0.58144
ENSG00000236830.5	-0.00782986	0.95051
ENSG00000237101.1	-2.25803	0.223303
ENSG00000237172.3	-0.0144277	0.516089
ENSG00000237190.3	0.00262545	0.918361
ENSG00000237214.3	-0.0393362	0.833573
ENSG00000237264.4	-0.112093	0.791366
ENSG00000237452.2	-1.6769	0.329947
ENSG00000237517.7	-0.124466	0.363922
ENSG00000237807.3	0.0456262	0.0653114
ENSG00000238178.5	0.4245	0.18428
ENSG00000238271.2	-0.0512874	0.485464
ENSG00000238279.1	-0.53263	0.192381
ENSG00000239264.7	-0.00137103	0.958678
ENSG00000239486.1	-2.6053	0.499945
ENSG00000239779.5	-0.0709545	0.350627
ENSG00000239969.4	0.295694	0.743433
ENSG00000240288.6	0.780486	0.317766
ENSG00000240338.4	-6.70094	0.240256
ENSG00000240674.1	-0.346658	0.905019
ENSG00000240710.1	-3.98064	0.353598
ENSG00000240972.1	0.0004128	0.946741
ENSG00000241527.1	1.44909	0.638857
ENSG00000241878.8	-0.0209173	0.269511
ENSG00000242252.1	0.0576726	0.87364
ENSG00000242852.5	1.53458	0.32406
ENSG00000242952.1	-3.63532	0.258344
ENSG00000243708.7	-0.0406316	0.76225
ENSG00000243716.9	-0.196473	0.364958
ENSG00000243960.1	-1.50155	0.516706
ENSG00000244038.8	0.00259611	0.37177
ENSG00000244165.1	-0.0128904	0.831891
ENSG00000244607.4	1.05801	0.152445
ENSG00000244953.1	0.67832	0.322166
ENSG00000245317.2	0.276859	0.579826
ENSG00000245719.1	-2.39574	0.476126
ENSG00000245910.7	0.00198583	0.732576
ENSG00000246548.3	-2.81419	0.420259
ENSG00000246596.5	-0.188481	0.670191
ENSG00000247679.2	-0.122952	0.64905
ENSG00000247728.2	2.24179	0.675921
ENSG00000248126.1	-1.05378	0.813503
ENSG00000248309.4	2.21813	0.0246702
ENSG00000248375.1	-0.695836	0.554503
ENSG00000248559.1	-3.28619	0.263099
ENSG00000248712.6	-0.627333	0.114865
ENSG00000249035.5	0.762527	0.821066
ENSG00000249635.1	-4.15674	0.472329
ENSG00000249751.3	0.227097	0.0552071
ENSG00000250107.1	-1.88338	0.578553
ENSG00000250641.1	0.252744	0.0849257
ENSG00000250794.2	-1.86795	0.559836
ENSG00000250979.1	-1.68741	0.529607
ENSG00000251087.3	0.284221	0.757401
ENSG00000251179.1	-1.20768	0.320254
ENSG00000251271.3	-2.07432	0.470584
ENSG00000251603.1	-0.28735	0.325761
ENSG00000251604.1	3.0792	0.267844
ENSG00000251669.4	-0.274119	0.143689
ENSG00000252202.1	3.21426	0.434679
ENSG00000253304.1	-0.0348675	0.462598
ENSG00000253317.1	0.662878	0.824439
ENSG00000253641.4	-0.0540453	0.642629
ENSG00000253649.2	-0.0417928	0.647218
ENSG00000253755.1	0.0018412	0.0340482
ENSG00000253859.2	-8.01252	0.2132
ENSG00000254204.1	2.38263	0.0549889
ENSG00000254338.1	-0.671112	0.482469
ENSG00000254521.5	0.0670683	0.0821104
ENSG00000254536.1	-1.55976	0.665812
ENSG00000254545.1	-0.0128944	0.986602
ENSG00000254558.1	-0.00868242	0.985187
ENSG00000254605.1	0.11391	0.349626
ENSG00000254802.1	1.24044	0.453082
ENSG00000254814.1	0.0148817	0.988665
ENSG00000254967.5	0.283513	0.823714
ENSG00000254978.2	0.0237913	0.955407
ENSG00000254980.1	-2.33971	0.493283
ENSG00000255191.1	-6.70383	0.372015
ENSG00000255200.1	-0.10457	0.686538
ENSG00000255282.5	-0.0169411	0.899817
ENSG00000255366.1	-1.54017	0.146037
ENSG00000255730.3	2.40513	0.238066
ENSG00000255769.6	0.0182334	0.612691
ENSG00000255823.2	-0.270606	0.675499
ENSG00000255864.4	-1.58481	0.497017
ENSG00000255867.1	-0.27812	0.855572
ENSG00000255967.1	-1.42751	0.459072
ENSG00000256028.2	-1.87268	0.138288
ENSG00000256210.3	2.57366	0.0829755
ENSG00000256269.5	0.0106796	0.484973
ENSG00000256943.1	-15.7589	0.140622
ENSG00000257283.1	2.66576	0.405044
ENSG00000257337.5	-0.177698	0.233246
ENSG00000257390.4	0.079633	0.958103
ENSG00000257727.4	-0.00135321	0.936511
ENSG00000257740.1	-0.0352649	0.982758
ENSG00000258130.6	-1.07025	0.595841
ENSG00000258301.3	-0.883315	0.0966242
ENSG00000258315.4	-0.123001	0.608843
ENSG00000258405.8	-2.2738	0.259853
ENSG00000258427.3	-1.12557	0.312125
ENSG00000258539.1	-1.00723	0.419061
ENSG00000258626.2	-0.855357	0.649447
ENSG00000258727.1	-0.144155	0.56938
ENSG00000258819.1	-1.20011	0.603392
ENSG00000258890.5	-0.029077	0.34434
ENSG00000258952.2	0.752723	0.577992
ENSG00000259040.4	0.712232	0.0814646
ENSG00000259093.1	1.30153	0.372217
ENSG00000259288.4	-3.69612	0.469344
ENSG00000259399.1	-0.84323	0.788486
ENSG00000259522.2	-2.53486	0.602191
ENSG00000259605.3	-1.00267	0.151617
ENSG00000259647.1	-0.500333	0.870874
ENSG00000259762.1	-1.8604	0.687036
ENSG00000259803.5	0.0142384	0.644756
ENSG00000259807.1	0.00649999	0.981175
ENSG00000259895.1	-7.58226	0.152621
ENSG00000259933.5	0.0870674	0.583816
ENSG00000260001.5	-0.352772	0.444262
ENSG00000260027.4	-0.0180964	0.485631
ENSG00000260105.5	4.98658	0.184274
ENSG00000260190.1	-0.928285	0.375833
ENSG00000260238.4	-0.059941	0.833233
ENSG00000260500.1	-5.91471	0.290491
ENSG00000260517.2	-0.0537513	0.759883
ENSG00000260645.1	-0.666038	0.588658
ENSG00000261052.4	-3.40005	0.575024
ENSG00000261123.1	0.0997014	0.532501
ENSG00000261295.1	0.19618	0.452056
ENSG00000261456.4	-2.07855	0.418862
ENSG00000261548.1	2.39327	0.357007
ENSG00000261659.2	0.0540682	0.832918
ENSG00000261668.1	-1.27619	0.327595
ENSG00000261707.1	-2.37214	0.457441
ENSG00000261884.2	-0.165569	0.364728
ENSG00000261924.1	-2.06151	0.390981
ENSG00000262006.1	-3.60423	0.19221
ENSG00000262074.5	-9.10627	0.139465
ENSG00000262877.4	0.090205	0.615616
ENSG00000262943.6	-0.0322839	0.704412
ENSG00000263011.1	-3.14736	0.303163
ENSG00000263050.1	-0.572851	0.375911
ENSG00000263214.1	-0.77947	0.413202
ENSG00000263316.1	-0.979914	0.285173
ENSG00000263370.1	6.71359	0.0743052
ENSG00000263429.3	-0.153066	0.519084
ENSG00000263934.3	-6.22232	0.213991
ENSG00000263946.1	-0.280652	0.525807
ENSG00000264635.1	1.47336	0.602807
ENSG00000264785.1	-0.489722	0.533051
ENSG00000265185.4	-2.06375	0.587302
ENSG00000265912.1	-1.51847	0.715923
ENSG00000266171.1	-3.10271	0.234304
ENSG00000266289.1	1.19367	0.644194
ENSG00000266402.3	-0.2189	0.499955
ENSG00000267053.5	-0.988492	0.705202
ENSG00000267074.1	0.563594	0.212337
ENSG00000267369.1	0.293889	0.175647
ENSG00000267383.5	-4.43355	0.0287406
ENSG00000267466.1	-0.709292	0.349991
ENSG00000267480.1	-0.228365	0.106811
ENSG00000267484.1	-0.391499	0.756524
ENSG00000267505.1	1.19979	0.740942
ENSG00000267506.4	-0.880309	0.24838
ENSG00000267510.1	0.29881	0.185049
ENSG00000267605.4	-10.7521	0.0673289
ENSG00000267694.1	-0.202044	0.834981
ENSG00000267724.1	-3.31926	0.331789
ENSG00000267744.1	0.255535	0.943485
ENSG00000267748.4	-0.708366	0.34702
ENSG00000267879.1	-0.614253	0.394976
ENSG00000268104.2	0.00412015	0.130724
ENSG00000268575.1	0.000380673	0.999073
ENSG00000268903.1	-0.00121879	0.988405
ENSG00000268938.2	-0.256261	0.910831
ENSG00000268970.1	0.561254	0.366042
ENSG00000269072.1	2.37823	0.0224884
ENSG00000269514.1	0.0819327	0.947015
ENSG00000269656.1	0.801902	0.726161
ENSG00000269858.4	-0.0195865	0.426238
ENSG00000269893.5	-0.00649679	0.553145
ENSG00000269982.1	-0.0655469	0.906221
ENSG00000270074.1	-1.02578	0.69949
ENSG00000270433.1	-2.1605	0.58266
ENSG00000270510.1	2.17822	0.581524
ENSG00000270765.4	0.00138781	0.996704
ENSG00000270882.2	0.510909	0.570512
ENSG00000270885.1	-0.0331832	0.775427
ENSG00000271553.1	-0.0903229	0.922355
ENSG00000271913.4	0.651753	0.348926
ENSG00000272006.1	1.59974	0.667009
ENSG00000272034.1	0.0870807	0.872208
ENSG00000272087.1	0.0354707	0.901237
ENSG00000272112.1	-0.136301	0.816523
ENSG00000272121.1	0.812581	0.0987297
ENSG00000272148.1	-3.18846	0.247594
ENSG00000272223.1	-0.407056	0.726636
ENSG00000272333.4	-0.00885656	0.354117
ENSG00000272391.4	-0.0284954	0.0900948
ENSG00000272438.1	-13.7666	0.0981855
ENSG00000272645.2	-0.0127926	0.933424
ENSG00000272689.1	0.212411	0.947705
ENSG00000272791.1	-1.14629	0.488297
ENSG00000272821.1	-0.0294106	0.162858
ENSG00000272829.1	-0.800923	0.315054
ENSG00000273027.1	-0.469866	0.634911
ENSG00000273073.1	0.41599	0.92786
ENSG00000273226.1	0.150641	0.748132
ENSG00000273265.1	-0.508535	0.504691
ENSG00000273311.1	-0.120826	0.369136
ENSG00000273350.1	-2.23044	0.301923
ENSG00000274049.3	-5.66825	0.325064
ENSG00000274363.1	-4.77033	0.27177
ENSG00000274736.3	1.25433	0.00651995
ENSG00000275301.1	1.40556	0.585437
ENSG00000275793.1	-0.446027	0.598709
ENSG00000276742.1	-1.2977	0.656703
ENSG00000276772.1	-2.65343	0.516331
ENSG00000277358.1	-3.21291	0.283713
ENSG00000277877.3	-0.164633	0.857131
ENSG00000277895.1	-0.0732054	0.970956
ENSG00000278075.1	-0.605711	0.706463
ENSG00000278464.1	0.226781	0.0020664
ENSG00000278603.1	-1.28237	0.383911
ENSG00000278932.2	-4.03003	0.171183
ENSG00000278978.1	-0.0568434	0.270186
ENSG00000279117.1	0.0321523	0.492524
ENSG00000279332.1	-0.048264	0.841131
ENSG00000279375.1	-1.27153	0.479628
ENSG00000279464.1	-0.109691	0.808268
ENSG00000279484.1	1.64059	0.0523818
ENSG00000279774.1	-0.783058	0.67157
ENSG00000279792.1	0.350201	0.776812
ENSG00000280212.1	0.335058	0.886521
ENSG00000280213.1	-0.585225	0.225217
ENSG00000280311.1	-1.71914	0.668559
ENSG00000280328.1	0.292938	0.616619
ENSG00000281097.1	0.530316	0.325537
ENSG00000281386.1	1.13008	0.193532
ENSG00000281538.1	-2.77448	0.0702722
ENSG00000281691.1	1.70037	0.519274

## Sheet: CG.DFI.KIRC
Gene	Coefficient	Logrank p-value
ENSG00000002330.12	-0.0035849	0.668887
ENSG00000004487.14	-0.00259631	0.894937
ENSG00000004534.13	-0.0417241	0.019892
ENSG00000004777.17	-0.0639986	0.203393
ENSG00000004864.12	0.0166787	0.239253
ENSG00000004975.10	0.0730401	0.0432833
ENSG00000005007.11	0.00567882	0.509968
ENSG00000005059.14	-0.0120929	0.723262
ENSG00000006007.10	-0.00525762	0.488588
ENSG00000006047.11	-0.0208927	0.753857
ENSG00000006282.18	0.00717758	0.336443
ENSG00000006283.16	-0.698468	0.610135
ENSG00000008056.11	0.0269925	0.836971
ENSG00000008083.12	0.001471	0.966701
ENSG00000008118.8	-0.00895054	0.885642
ENSG00000008256.14	0.0179873	0.370204
ENSG00000008323.14	0.069197	0.328221
ENSG00000008438.4	-0.425062	0.662307
ENSG00000008441.15	0.014961	0.0152077
ENSG00000009724.15	-0.585851	0.120734
ENSG00000010327.9	-0.000295542	0.919842
ENSG00000011009.9	-0.00214358	0.818477
ENSG00000011143.15	0.030939	0.558478
ENSG00000011304.15	0.00194192	0.611941
ENSG00000012211.11	0.0710787	0.323914
ENSG00000013306.14	-0.00247479	0.485474
ENSG00000015532.8	0.0111909	0.266233
ENSG00000016402.11	-0.869446	0.263379
ENSG00000016864.15	-0.0057624	0.764953
ENSG00000019102.10	-0.365216	0.213274
ENSG00000019144.15	0.00337359	0.659819
ENSG00000025708.11	-0.000726004	0.853781
ENSG00000029639.9	-0.100024	0.337168
ENSG00000030582.15	0.00232586	0.11747
ENSG00000033100.13	0.0154368	0.183361
ENSG00000035681.6	0.00449487	0.886802
ENSG00000035720.6	-1.26644	0.186399
ENSG00000037042.8	-0.00605131	0.882828
ENSG00000042062.10	-0.0142606	0.386063
ENSG00000047579.18	0.0298665	0.282133
ENSG00000047849.20	0.00475111	0.0895736
ENSG00000048462.9	-0.0613039	0.759697
ENSG00000050426.14	-0.002692	0.686716
ENSG00000050820.15	-0.00115964	0.845688
ENSG00000052344.14	-0.00399458	0.521909
ENSG00000054983.15	0.00948516	0.317701
ENSG00000055211.11	0.00470397	0.553175
ENSG00000059691.10	-0.0106906	0.604273
ENSG00000059915.15	-0.000283466	0.995957
ENSG00000061273.16	0.00259526	0.756185
ENSG00000062096.13	0.00418841	0.896313
ENSG00000062282.13	0.0660112	0.450949
ENSG00000062524.14	-0.654689	0.345563
ENSG00000064012.20	0.0219963	0.185451
ENSG00000064309.13	0.00909444	0.462443
ENSG00000064601.15	0.00130895	0.447718
ENSG00000064932.14	-0.00438885	0.635373
ENSG00000065320.7	-0.0333553	0.519727
ENSG00000065923.8	-0.00203734	0.890995
ENSG00000067182.6	0.00294978	0.483524
ENSG00000067704.9	0.0134471	0.0128793
ENSG00000067829.17	0.00536048	0.623425
ENSG00000068137.13	0.0350179	0.26693
ENSG00000068305.16	0.000215625	0.976547
ENSG00000068383.17	0.0313247	0.266146
ENSG00000068615.15	-0.0174416	0.819778
ENSG00000069424.13	0.000619236	0.969589
ENSG00000070047.10	0.00473616	0.794891
ENSG00000070985.12	-4.65204	0.323289
ENSG00000071282.10	0.00657351	0.641502
ENSG00000072163.17	-0.000266772	0.960487
ENSG00000072518.19	-0.00642898	0.761718
ENSG00000072736.17	0.0264485	0.290575
ENSG00000072778.18	0.00080704	0.621796
ENSG00000074276.9	-0.0125461	0.242409
ENSG00000075975.14	-0.0187614	0.628698
ENSG00000076067.10	0.0122716	0.136868
ENSG00000076108.10	0.00305701	0.613845
ENSG00000076344.14	-0.790358	0.192325
ENSG00000076706.13	0.00170991	0.0538841
ENSG00000077092.17	-0.0389109	0.209659
ENSG00000077097.12	-0.00125152	0.857262
ENSG00000077150.16	-0.000630676	0.925557
ENSG00000078061.11	0.00197906	0.814849
ENSG00000078814.14	-0.172021	0.329273
ENSG00000081181.6	0.00757507	0.227935
ENSG00000082014.15	-0.0397892	0.272978
ENSG00000083812.10	-0.100321	0.482817
ENSG00000084693.14	0.0156298	0.013033
ENSG00000084754.9	0.0026976	0.11302
ENSG00000086159.11	-0.358777	0.454493
ENSG00000087087.17	-0.00624739	0.649455
ENSG00000087191.11	-2.02302e-05	0.995556
ENSG00000088038.16	0.0125203	0.641558
ENSG00000089050.13	0.0178218	0.0610034
ENSG00000089163.4	0.0893567	0.67066
ENSG00000089486.15	4.12466e-05	0.995467
ENSG00000089820.14	-0.0141251	0.369276
ENSG00000090097.19	-0.0747477	0.234864
ENSG00000090975.11	0.0147362	0.633943
ENSG00000091622.14	-0.0473639	0.671797
ENSG00000092010.13	0.00200936	0.579288
ENSG00000092051.15	-0.049513	0.788458
ENSG00000092108.19	-0.0207722	0.278638
ENSG00000092758.14	-1.06543	0.112085
ENSG00000092820.16	0.000302858	0.568989
ENSG00000093144.17	0.0047464	0.676626
ENSG00000096063.13	-0.0127778	0.690725
ENSG00000096384.18	0.00178788	0.0235756
ENSG00000099365.8	-0.0530268	0.661773
ENSG00000099377.12	6.60381e-05	0.981391
ENSG00000099795.5	-0.00236405	0.565559
ENSG00000099797.10	0.000309855	0.961988
ENSG00000099800.6	-0.00498611	0.624463
ENSG00000099817.10	0.00888044	0.0457565
ENSG00000099821.12	0.000701701	0.956323
ENSG00000099822.2	-0.0610468	0.576961
ENSG00000099899.13	-0.0220157	0.458212
ENSG00000099904.14	-0.000300781	0.986632
ENSG00000099956.16	0.01753	0.224986
ENSG00000099957.15	-1.86244	0.284482
ENSG00000099958.13	-0.00315192	0.824191
ENSG00000099960.11	-0.599619	0.673136
ENSG00000100078.3	-4.0281	0.757913
ENSG00000100079.6	0.000996277	0.774897
ENSG00000100139.12	-0.0255273	0.396342
ENSG00000100196.9	0.000509794	0.963796
ENSG00000100201.17	-0.00364122	0.0400748
ENSG00000100220.10	-6.12046e-05	0.994149
ENSG00000100239.14	-0.0318152	0.114353
ENSG00000100241.19	-0.00343429	0.716585
ENSG00000100276.9	-1.20684	0.158893
ENSG00000100359.19	-0.0298471	0.172454
ENSG00000100417.10	0.00397971	0.61784
ENSG00000100433.14	-0.108424	0.818999
ENSG00000100522.7	-0.0261224	0.361716
ENSG00000100767.14	0.00341729	0.296589
ENSG00000100908.12	-0.0350981	0.493919
ENSG00000100918.11	-0.0224014	0.760159
ENSG00000100979.13	0.00122519	0.426092
ENSG00000100982.10	0.0170054	0.325418
ENSG00000100991.10	-0.000806771	0.938853
ENSG00000101003.9	-0.0180642	0.874752
ENSG00000101004.13	-0.00826784	0.756554
ENSG00000101082.12	-0.0136264	0.811765
ENSG00000101084.15	-0.00880937	0.815148
ENSG00000101158.11	0.01701	0.130455
ENSG00000101160.12	0.000268217	0.863254
ENSG00000101190.11	-0.0374815	0.466123
ENSG00000101220.16	0.00127163	0.944809
ENSG00000101298.12	-0.0903966	0.405938
ENSG00000101343.13	0.0200558	0.322033
ENSG00000101384.10	0.00362249	0.128235
ENSG00000101460.11	-0.0224686	0.383694
ENSG00000101464.9	-0.00546227	0.781473
ENSG00000101882.8	0.0511884	0.324413
ENSG00000102007.9	0.00226733	0.410812
ENSG00000102109.8	-0.0221061	0.294047
ENSG00000102144.12	0.000895983	0.0711065
ENSG00000102302.7	0.020902	0.71214
ENSG00000102362.14	0.0252079	0.476897
ENSG00000102710.18	-0.0107694	0.719132
ENSG00000102854.13	-0.000603863	0.766005
ENSG00000102978.11	0.0101898	0.143021
ENSG00000102984.13	0.178698	0.166885
ENSG00000103024.6	-0.00750889	0.478608
ENSG00000103044.9	-0.192482	0.26828
ENSG00000103067.10	-0.0435598	0.3388
ENSG00000103111.13	0.0100926	0.467416
ENSG00000103126.13	-0.0106858	0.672585
ENSG00000103264.14	0.0043236	0.852378
ENSG00000103351.11	0.0351225	0.213031
ENSG00000103415.10	-0.00340326	0.776621
ENSG00000103479.13	-0.00024141	0.967809
ENSG00000103510.18	-0.0064267	0.799482
ENSG00000104341.15	0.0016777	0.708697
ENSG00000104524.12	-0.0136119	0.632938
ENSG00000104660.16	0.00494736	0.264587
ENSG00000104679.9	0.0229646	0.294915
ENSG00000104859.13	-0.0413881	0.161515
ENSG00000104903.4	-0.00624724	0.858213
ENSG00000104936.16	-0.0301851	0.299989
ENSG00000104964.13	-0.000356469	0.794856
ENSG00000105135.14	-0.00416261	0.509934
ENSG00000105137.11	0.0249141	0.145388
ENSG00000105258.7	0.00214258	0.8768
ENSG00000105325.12	0.0104339	0.629088
ENSG00000105355.7	0.0127943	0.106039
ENSG00000105364.12	-0.00132141	0.933403
ENSG00000105373.17	0.000784198	0.523087
ENSG00000105556.9	0.00575643	0.88602
ENSG00000105617.3	-0.0802142	0.366975
ENSG00000105655.17	0.0097194	0.394238
ENSG00000105656.11	-0.0465227	0.281706
ENSG00000105662.14	-0.0166416	0.60154
ENSG00000105664.9	0.0152852	0.124743
ENSG00000105701.14	0.0023006	0.326502
ENSG00000105708.8	0.00843901	0.90769
ENSG00000105856.12	0.0103273	0.173745
ENSG00000105877.16	-1.05523e-05	0.998396
ENSG00000105996.6	0.209728	0.194116
ENSG00000106077.17	-0.012892	0.373021
ENSG00000106123.10	0.00570315	0.755993
ENSG00000106346.10	-0.0541216	0.311617
ENSG00000106367.12	0.0099388	0.19553
ENSG00000106484.13	0.0118676	0.443176
ENSG00000106624.7	0.000466029	0.25924
ENSG00000106628.9	0.000885858	0.797403
ENSG00000106948.15	-0.00334949	0.75293
ENSG00000106991.12	0.000514454	0.58003
ENSG00000107159.11	0.0025913	0.15279
ENSG00000107201.8	0.0228087	0.0521242
ENSG00000107404.16	-0.0126181	0.485415
ENSG00000107581.11	0.00397712	0.324369
ENSG00000107672.13	-0.127554	0.080639
ENSG00000107736.18	-0.00589586	0.797988
ENSG00000107829.12	0.009439	0.308873
ENSG00000107872.11	-0.023739	0.515492
ENSG00000107874.9	0.00929074	0.413995
ENSG00000107902.12	-0.00258636	0.91516
ENSG00000108262.14	0.00796248	0.459304
ENSG00000108309.11	-0.0074857	0.845597
ENSG00000108556.7	0.164456	0.506797
ENSG00000108591.8	0.00820049	0.815848
ENSG00000108592.15	0.00729166	0.670043
ENSG00000108602.16	0.0313519	0.823379
ENSG00000108604.14	-7.8114e-05	0.99438
ENSG00000108788.10	0.0108005	0.415286
ENSG00000108797.10	0.0153083	0.572001
ENSG00000108799.11	0.0108139	0.579044
ENSG00000108840.14	0.00838991	0.484417
ENSG00000108846.14	0.000674381	0.772091
ENSG00000108854.14	-0.0206426	0.37605
ENSG00000108924.12	0.0072204	0.445538
ENSG00000108963.16	0.0326644	0.270155
ENSG00000109519.11	-0.00307052	0.844153
ENSG00000109686.15	0.0119822	0.257279
ENSG00000109956.11	-0.0320433	0.774857
ENSG00000110042.6	0.0195144	0.0877343
ENSG00000110395.4	0.00872611	0.506692
ENSG00000110697.11	0.00160285	0.903343
ENSG00000110700.5	-0.000252898	0.840886
ENSG00000110711.8	-9.33773e-05	0.989811
ENSG00000110925.5	-0.0140977	0.657312
ENSG00000111077.16	0.000831243	0.815381
ENSG00000111087.8	0.0987142	0.542802
ENSG00000111276.9	0.0145561	0.044481
ENSG00000111344.10	0.00294574	0.856864
ENSG00000111445.12	0.112783	0.0817775
ENSG00000111669.13	0.000466291	0.118696
ENSG00000111671.8	-0.0677118	0.361384
ENSG00000112137.15	0.0595697	0.0168049
ENSG00000112511.16	-0.00769533	0.445732
ENSG00000112514.14	0.000461929	0.908197
ENSG00000113716.11	0.0322775	0.0418486
ENSG00000113758.12	0.000175307	0.974453
ENSG00000113763.9	-0.0207493	0.683754
ENSG00000114354.11	0.00178788	0.750581
ENSG00000115053.14	0.00488329	0.0292778
ENSG00000115155.15	-0.149891	0.788691
ENSG00000115232.12	-0.00384639	0.761386
ENSG00000115275.10	0.0113217	0.424754
ENSG00000115310.16	-0.00032259	0.711287
ENSG00000115325.12	0.0100208	0.7539
ENSG00000115657.11	0.0248479	0.527705
ENSG00000115841.18	-0.0908617	0.454886
ENSG00000116005.10	0.00694478	0.0159667
ENSG00000116161.16	0.0130272	0.18692
ENSG00000116176.6	-0.0199227	0.665128
ENSG00000116221.14	0.00494288	0.274219
ENSG00000116254.16	-0.0480148	0.579789
ENSG00000116329.9	-0.193144	0.7107
ENSG00000116478.10	0.00528232	0.626234
ENSG00000116957.11	0.00951829	0.781916
ENSG00000117308.13	0.00606297	0.444191
ENSG00000117411.15	-0.000442476	0.972712
ENSG00000117419.13	0.0186024	0.0783756
ENSG00000118094.10	-0.0647561	0.311918
ENSG00000118518.14	-0.0103975	0.698468
ENSG00000118873.14	0.0169457	0.145531
ENSG00000118997.12	-0.0239832	0.615348
ENSG00000119041.9	-0.0127046	0.721678
ENSG00000119396.9	-0.00307371	0.629528
ENSG00000119397.15	-0.0387476	0.360413
ENSG00000119408.15	0.0073566	0.0390962
ENSG00000119522.14	0.0140799	0.249918
ENSG00000119689.13	-0.00131469	0.768202
ENSG00000119698.10	-0.584001	0.438988
ENSG00000119915.4	0.0826044	0.900702
ENSG00000119986.6	0.0895263	0.210106
ENSG00000120333.4	0.06377	0.122117
ENSG00000120699.11	-0.0763045	0.224887
ENSG00000120784.14	-0.0608047	0.391248
ENSG00000120860.9	-0.00154545	0.946838
ENSG00000120948.14	-0.00153457	0.888485
ENSG00000121053.5	-0.17645	0.898702
ENSG00000121075.8	0.0747697	0.855197
ENSG00000121653.10	0.0115813	0.548181
ENSG00000122033.13	0.0132142	0.393215
ENSG00000122034.11	0.000938778	0.779482
ENSG00000122203.13	0.00283783	0.156306
ENSG00000122674.10	0.0721882	0.38671
ENSG00000122696.11	-0.0864592	0.346176
ENSG00000122729.17	0.00103714	0.75292
ENSG00000122735.14	-0.212346	0.560005
ENSG00000122971.7	-0.00245713	0.668617
ENSG00000123136.13	-0.0118763	0.489088
ENSG00000123143.11	0.00469634	0.089194
ENSG00000123146.18	0.00447138	0.349534
ENSG00000123329.16	-0.0530486	0.191072
ENSG00000123342.14	0.00133106	0.919798
ENSG00000123395.13	-0.027803	0.345705
ENSG00000123485.10	0.00413711	0.966208
ENSG00000123737.11	-0.0249596	0.635782
ENSG00000123870.10	-0.163141	0.493056
ENSG00000124151.17	-0.00203824	0.864627
ENSG00000124541.6	-0.0281671	0.459223
ENSG00000124574.13	-0.0479233	0.411482
ENSG00000124587.12	-0.00734888	0.703667
ENSG00000124593.13	-0.07675	0.370837
ENSG00000124713.5	-4.52126	0.0319183
ENSG00000124915.9	0.0589738	0.960123
ENSG00000124939.5	-2.74334	0.23602
ENSG00000125037.11	-0.00658609	0.525859
ENSG00000125148.6	0.000557902	0.58174
ENSG00000125149.10	0.0409776	0.169579
ENSG00000125170.9	0.0216956	0.0186576
ENSG00000125257.12	0.00326002	0.569937
ENSG00000125355.14	-0.0215673	0.542651
ENSG00000125520.12	0.00202978	0.727309
ENSG00000125650.4	-0.0715196	0.725655
ENSG00000125652.6	-0.00509563	0.536186
ENSG00000125741.4	-0.0041858	0.81325
ENSG00000125753.12	-0.00218249	0.767872
ENSG00000125775.13	-0.0649767	0.550546
ENSG00000126010.5	-0.0322438	0.819642
ENSG00000126246.8	-0.472242	0.0961788
ENSG00000126247.9	0.00200924	0.243837
ENSG00000126464.12	0.0291017	0.131721
ENSG00000126500.3	-1.19681	0.302929
ENSG00000126603.7	0.00662015	0.400299
ENSG00000126778.8	-0.0548009	0.555504
ENSG00000126895.12	-0.0517292	0.722312
ENSG00000127311.8	-0.108186	0.229762
ENSG00000127533.3	0.00054644	0.932415
ENSG00000127564.15	-0.0927473	0.590303
ENSG00000127585.10	0.00129509	0.777426
ENSG00000127948.12	-0.000973166	0.848834
ENSG00000128016.5	0.000261025	0.734783
ENSG00000128191.12	-0.0281103	0.452359
ENSG00000128283.6	0.00278053	0.746241
ENSG00000128322.6	-0.137716	0.748069
ENSG00000128346.9	-0.34339	0.370619
ENSG00000128463.11	0.00265257	0.780436
ENSG00000128482.14	-0.242526	0.506274
ENSG00000128563.12	-0.00712459	0.798675
ENSG00000128564.6	-0.0424687	0.820417
ENSG00000128595.15	0.00651741	0.029866
ENSG00000128617.2	0.178912	0.491566
ENSG00000128709.11	0.010949	0.397411
ENSG00000129103.16	0.00772323	0.0482239
ENSG00000129195.14	0.282192	0.0512248
ENSG00000129347.18	0.023678	0.424647
ENSG00000129451.10	-0.0662457	0.67684
ENSG00000129691.14	0.0416	0.127463
ENSG00000129744.2	-0.0182682	0.88739
ENSG00000129910.6	-0.0559309	0.888263
ENSG00000129951.17	-18.4596	0.0400105
ENSG00000129968.14	-0.0228686	0.343196
ENSG00000130244.11	-0.00426401	0.923602
ENSG00000130487.5	-0.103119	0.467809
ENSG00000130511.14	-0.00049567	0.973316
ENSG00000130545.14	0.00941091	0.641976
ENSG00000130584.9	-0.0415495	0.255647
ENSG00000130702.12	0.000111782	0.943937
ENSG00000130706.11	0.00243441	0.781332
ENSG00000130714.14	0.00635411	0.776774
ENSG00000130717.11	0.0128565	0.408527
ENSG00000130734.8	-0.0121558	0.625484
ENSG00000130748.6	-0.0440106	0.618331
ENSG00000130751.8	-0.0121778	0.956469
ENSG00000130758.6	-0.0254755	0.691059
ENSG00000130811.9	-0.00243243	0.668084
ENSG00000130812.9	-0.447341	0.59734
ENSG00000130813.16	0.0108932	0.681488
ENSG00000130826.14	0.0407037	0.11795
ENSG00000130827.6	-0.0103185	0.56146
ENSG00000130830.13	0.00329931	0.656633
ENSG00000130876.10	0.0357314	0.649967
ENSG00000130881.12	0.0266487	0.104819
ENSG00000131149.16	-0.0096851	0.387967
ENSG00000131153.7	-0.0405213	0.610591
ENSG00000131188.10	-0.0644926	0.550124
ENSG00000131236.15	0.00454982	0.120277
ENSG00000131238.15	0.00405502	0.295297
ENSG00000131389.15	-0.000967733	0.903099
ENSG00000131470.13	0.0639557	0.825132
ENSG00000131584.17	-0.0400012	0.164734
ENSG00000131650.12	-2.53613	0.221756
ENSG00000131788.14	0.103811	0.00640549
ENSG00000131899.9	0.0541253	0.0394627
ENSG00000132153.13	-0.00455311	0.739994
ENSG00000132155.10	-0.00560439	0.619519
ENSG00000132313.13	-0.0087667	0.581124
ENSG00000132388.11	0.00881854	0.690232
ENSG00000132507.16	4.57902e-05	0.980012
ENSG00000132613.13	-0.0232975	0.56265
ENSG00000132622.9	0.00513723	0.828
ENSG00000132793.10	-0.0145933	0.377488
ENSG00000133019.10	0.00286939	0.923092
ENSG00000133055.7	-2.6857	0.368534
ENSG00000133318.12	0.00459098	0.260108
ENSG00000133794.16	-0.0478327	0.232551
ENSG00000133805.14	-0.011584	0.377768
ENSG00000133961.18	-0.00179634	0.784937
ENSG00000134013.14	0.00215305	0.133503
ENSG00000134317.16	-0.248638	0.186325
ENSG00000134318.12	0.00346396	0.689217
ENSG00000134398.11	-0.158573	0.725816
ENSG00000134480.12	0.0267842	0.245339
ENSG00000134668.11	-0.209274	0.459532
ENSG00000134684.9	0.00502181	0.684202
ENSG00000134697.11	0.00962477	0.553512
ENSG00000134769.20	0.00522004	0.78743
ENSG00000134780.8	0.0701846	0.363826
ENSG00000135093.11	0.0487202	0.167267
ENSG00000135144.6	-0.0993794	0.315648
ENSG00000135365.14	0.0430011	0.112065
ENSG00000135414.8	0.0103571	0.799035
ENSG00000135451.11	-0.0601986	0.660734
ENSG00000135597.17	0.0205018	0.583334
ENSG00000135678.10	0.00229137	0.58781
ENSG00000135749.17	-0.00763074	0.816079
ENSG00000135778.10	0.017554	0.016182
ENSG00000135945.8	-0.0237391	0.386027
ENSG00000136048.12	0.00280774	0.63648
ENSG00000136059.13	0.0234579	0.662125
ENSG00000136478.6	4.65469e-05	0.994588
ENSG00000136854.16	0.00614597	0.197174
ENSG00000136877.13	-0.0198286	0.366809
ENSG00000136881.10	0.0845201	0.000368843
ENSG00000136930.11	0.00460565	0.534026
ENSG00000137070.16	-0.14657	0.125776
ENSG00000137154.11	-9.91693e-05	0.65703
ENSG00000137200.11	0.0204982	0.41517
ENSG00000137267.5	-0.029158	0.552615
ENSG00000137274.11	-0.0242587	0.401067
ENSG00000137563.10	-0.00150777	0.924669
ENSG00000137575.10	0.00111935	0.671223
ENSG00000137825.9	-0.0111886	0.862152
ENSG00000137841.10	-0.0248904	0.298943
ENSG00000137843.10	-0.976277	0.465982
ENSG00000137877.9	0.000333825	0.996085
ENSG00000138061.10	0.000122003	0.934163
ENSG00000138073.12	-0.00126315	0.909511
ENSG00000138100.12	0.0107256	0.37066
ENSG00000138193.13	0.0559186	0.00139019
ENSG00000138794.8	0.00404226	0.945678
ENSG00000138834.11	-0.010316	0.315141
ENSG00000139044.9	-0.0230031	0.46156
ENSG00000139540.10	0.00109663	0.804568
ENSG00000139645.9	-0.0014982	0.920325
ENSG00000139835.12	0.0292423	0.606686
ENSG00000140093.8	0.942092	0.199979
ENSG00000140104.12	-0.0357749	0.472799
ENSG00000140199.10	0.00249454	0.850357
ENSG00000140854.11	0.0260839	0.314146
ENSG00000140859.14	0.00650542	0.445234
ENSG00000140876.10	-0.0942241	0.438762
ENSG00000140931.18	0.00717497	0.425763
ENSG00000140939.13	0.00291396	0.422779
ENSG00000140990.13	-0.000972034	0.771809
ENSG00000141068.12	0.0049687	0.0861069
ENSG00000141179.12	0.0558941	0.018732
ENSG00000141219.14	0.0171952	0.685994
ENSG00000141349.7	0.000738782	0.916125
ENSG00000141401.10	0.0014384	0.489638
ENSG00000141447.15	0.00439795	0.511677
ENSG00000141503.14	0.000713446	0.940243
ENSG00000141522.10	0.00269576	0.498529
ENSG00000141564.12	0.00815821	0.617657
ENSG00000141744.3	-1.92629	0.311795
ENSG00000141934.8	0.00864763	0.66874
ENSG00000142186.15	0.00879229	0.39832
ENSG00000142197.11	0.0114973	0.0672659
ENSG00000142208.14	-0.00113808	0.899872
ENSG00000142632.15	-0.0319805	0.659801
ENSG00000143157.10	0.0222435	0.0784453
ENSG00000143198.11	0.00236363	0.582932
ENSG00000143318.11	0.68363	0.619173
ENSG00000143340.6	0.165996	0.164557
ENSG00000143382.12	0.0241966	0.0860973
ENSG00000143442.20	-0.000844773	0.939475
ENSG00000143494.14	0.301011	0.150113
ENSG00000143552.8	-0.342547	0.642109
ENSG00000143553.9	0.0376082	0.0745657
ENSG00000143621.15	0.00675143	0.308484
ENSG00000143748.16	0.0557494	0.409507
ENSG00000143819.11	0.00202316	0.418717
ENSG00000143845.13	0.0076048	0.360794
ENSG00000143862.6	0.0302763	0.0987354
ENSG00000143952.18	0.0147503	0.383947
ENSG00000143977.12	-0.00359369	0.791515
ENSG00000143994.12	-0.313041	0.290801
ENSG00000144045.12	0.0739943	0.927416
ENSG00000144395.16	0.0130883	0.542172
ENSG00000144596.10	-0.0746835	0.587765
ENSG00000144597.12	0.0161797	0.55605
ENSG00000144746.6	0.00127982	0.592189
ENSG00000144857.13	0.00573633	0.794327
ENSG00000145002.11	1.12448	0.56602
ENSG00000145244.10	-0.0374153	0.82943
ENSG00000145246.12	-0.0102683	0.362711
ENSG00000145386.8	0.0331549	0.614234
ENSG00000145416.12	-0.0263837	0.249485
ENSG00000145715.13	0.0158611	0.210422
ENSG00000145721.10	0.0141143	0.0964924
ENSG00000145901.13	0.00371525	0.00116776
ENSG00000146223.13	0.0126011	0.33061
ENSG00000146426.16	-0.15714	0.311048
ENSG00000146477.5	0.0120334	0.60338
ENSG00000146556.13	-0.169175	0.350623
ENSG00000146830.9	-0.014243	0.270659
ENSG00000147119.3	0.0492432	0.467838
ENSG00000147465.10	-0.642514	0.658743
ENSG00000147573.15	-0.00347554	0.768221
ENSG00000147912.11	-0.227139	0.249079
ENSG00000148082.8	-0.101139	0.646463
ENSG00000148204.10	0.00933166	0.75774
ENSG00000148337.18	0.0148223	0.210057
ENSG00000148358.18	0.00654388	0.272456
ENSG00000148362.9	-0.0633538	0.127503
ENSG00000148600.13	0.00511658	0.0346402
ENSG00000148702.13	0.00129411	0.263818
ENSG00000148824.17	-0.360766	0.0427882
ENSG00000148925.9	-0.000997944	0.976514
ENSG00000149179.12	0.017874	0.3152
ENSG00000149182.13	-0.000644751	0.957436
ENSG00000149243.14	0.0404995	0.86187
ENSG00000149273.13	-2.18577e-05	0.962679
ENSG00000149328.13	0.025873	0.0137439
ENSG00000149346.13	-0.067036	0.327088
ENSG00000149489.7	0.0593306	0.328367
ENSG00000149541.8	-0.00117238	0.926183
ENSG00000149782.10	-0.0214685	0.455046
ENSG00000149922.9	-0.0490694	0.657414
ENSG00000149923.12	0.00302745	0.659176
ENSG00000149929.14	0.0448984	0.0643424
ENSG00000149930.16	-0.000256974	0.980154
ENSG00000149968.10	-21.9453	0.0983523
ENSG00000149970.13	-0.769095	0.47054
ENSG00000150281.6	0.0670847	0.200961
ENSG00000151117.7	-0.000289095	0.992313
ENSG00000151303.11	-0.550199	0.485664
ENSG00000151364.14	0.0223787	0.59372
ENSG00000151365.2	-0.345727	0.357976
ENSG00000151366.11	-0.0133216	0.449499
ENSG00000152382.5	0.0372954	0.517641
ENSG00000153162.8	0.00658003	0.821391
ENSG00000153944.9	-0.00367985	0.408227
ENSG00000154040.19	-0.134712	0.589403
ENSG00000154146.11	0.042237	0.0198749
ENSG00000154175.15	0.00421323	0.118783
ENSG00000154222.13	-0.000783279	0.974174
ENSG00000154639.17	0.014738	0.155283
ENSG00000154640.13	-0.00338412	0.749214
ENSG00000154864.10	-0.00028113	0.979789
ENSG00000154945.6	0.0153312	0.308337
ENSG00000155026.15	-1.34517	0.671276
ENSG00000155252.13	-0.0126478	0.616715
ENSG00000155363.17	0.0144928	0.380238
ENSG00000155366.15	0.00160178	0.349204
ENSG00000155506.15	0.00867732	0.0132838
ENSG00000155749.11	-2.4961	0.11844
ENSG00000155850.7	0.0263468	0.164326
ENSG00000155974.10	-0.013936	0.747353
ENSG00000156096.11	-0.412026	0.500736
ENSG00000156381.7	-0.0269817	0.387883
ENSG00000156642.15	-0.00115473	0.76988
ENSG00000157017.14	-1.47071	0.133892
ENSG00000157020.16	-0.00636433	0.556024
ENSG00000157077.13	0.0285973	0.189145
ENSG00000157111.11	0.0063277	0.333113
ENSG00000157216.14	0.00945021	0.185328
ENSG00000157368.9	0.00323119	0.881883
ENSG00000157593.15	0.0173755	0.0830975
ENSG00000157833.11	-0.0417458	0.363782
ENSG00000157851.15	-0.644568	0.537329
ENSG00000157856.9	-3.25405	0.22169
ENSG00000158008.8	-2.24386	0.182367
ENSG00000158014.13	-0.00276949	0.878251
ENSG00000158158.10	0.0304978	0.242469
ENSG00000158417.9	0.00598054	0.152864
ENSG00000158483.14	-0.0810235	0.572748
ENSG00000158526.7	0.000855551	0.940817
ENSG00000158552.11	-0.000782945	0.922514
ENSG00000158578.17	0.0199127	0.689646
ENSG00000158623.13	0.0135228	0.385817
ENSG00000158792.14	-0.0245518	0.508893
ENSG00000158828.5	0.0156411	0.31037
ENSG00000159023.17	0.00352545	0.376619
ENSG00000159184.7	-0.015722	0.89388
ENSG00000159247.11	-0.0259243	0.924768
ENSG00000159263.14	-0.22384	0.506917
ENSG00000159267.13	0.0305473	0.12252
ENSG00000159374.16	-1.16484	0.142913
ENSG00000159377.9	0.00408909	0.192879
ENSG00000159792.8	0.000767343	0.949208
ENSG00000159842.13	-0.00534312	0.496678
ENSG00000160050.13	-0.130746	0.335794
ENSG00000160111.11	-0.0139953	0.768428
ENSG00000160172.9	0.071063	0.589896
ENSG00000160214.11	0.00874855	0.604935
ENSG00000160325.13	-0.00283663	0.813738
ENSG00000160326.12	-0.0765077	0.386071
ENSG00000160404.16	-0.0452737	0.586597
ENSG00000160469.15	-0.0652248	0.7081
ENSG00000160781.14	-0.264136	0.145039
ENSG00000160818.15	0.00582039	0.867869
ENSG00000160883.9	-0.0897346	0.3931
ENSG00000160951.3	-1.2943	0.416504
ENSG00000161082.11	-0.135644	0.294822
ENSG00000161091.11	0.00132552	0.875916
ENSG00000161281.9	-0.00964288	0.42668
ENSG00000161395.11	0.0253722	0.0985434
ENSG00000161682.13	-0.0838237	0.693594
ENSG00000161800.11	0.00169127	0.926774
ENSG00000162006.8	-0.488256	0.651671
ENSG00000162066.13	0.00285272	0.836055
ENSG00000162078.10	-0.675176	0.281944
ENSG00000162241.11	-0.0923354	0.152277
ENSG00000162434.10	0.00408506	0.126899
ENSG00000162437.13	0.0233584	0.161639
ENSG00000162522.9	0.00548074	0.446865
ENSG00000162572.18	-0.25933	0.0805727
ENSG00000162728.4	0.825831	0.624956
ENSG00000162729.12	0.0178395	0.0865367
ENSG00000162885.11	-0.0269423	0.778862
ENSG00000162892.14	-0.135323	0.663845
ENSG00000162894.10	-0.0116808	0.799031
ENSG00000162976.11	0.00124521	0.885958
ENSG00000163154.5	-0.0289825	0.632519
ENSG00000163155.10	0.165115	0.0225021
ENSG00000163156.10	0.0118682	0.606099
ENSG00000163159.10	0.021396	0.302562
ENSG00000163249.8	-0.00795061	0.738282
ENSG00000163251.3	0.00215496	0.801451
ENSG00000163380.14	-0.239114	0.71677
ENSG00000163382.10	-0.00125469	0.823126
ENSG00000163485.14	0.0487705	0.0303091
ENSG00000163697.15	0.00646726	0.211538
ENSG00000163703.16	0.00362975	0.825216
ENSG00000163704.10	-0.123205	0.47432
ENSG00000163794.6	-0.15039	0.688345
ENSG00000163806.14	-2.28056	0.0531501
ENSG00000163879.10	0.0178103	0.237066
ENSG00000163938.15	-0.0122115	0.599446
ENSG00000164054.14	0.00712308	0.0463797
ENSG00000164062.11	-0.00447506	0.453176
ENSG00000164070.10	-0.00603525	0.583341
ENSG00000164099.3	0.124058	0.0130551
ENSG00000164296.6	0.0778744	0.282763
ENSG00000164597.12	0.0214065	0.278771
ENSG00000164649.18	0.0341786	0.0119956
ENSG00000164663.12	-0.241648	0.092325
ENSG00000164674.14	0.00671914	0.767675
ENSG00000164729.7	-19.7923	0.180576
ENSG00000164742.13	-0.052677	0.264507
ENSG00000164776.8	-0.812821	0.163156
ENSG00000164808.15	-0.0112492	0.483297
ENSG00000164855.14	-0.0611209	0.279743
ENSG00000164889.11	0.00562546	0.268672
ENSG00000164896.18	-0.00518423	0.541078
ENSG00000164902.12	0.050016	0.00159609
ENSG00000164932.11	0.00480503	0.114156
ENSG00000165125.16	-0.0544937	0.737604
ENSG00000165458.12	0.000491974	0.953329
ENSG00000165905.15	-0.0209692	0.42202
ENSG00000165983.13	0.00172249	0.357091
ENSG00000165985.9	0.00340454	0.905312
ENSG00000166004.13	-0.0150358	0.786868
ENSG00000166171.11	0.0146013	0.24104
ENSG00000166311.8	-0.00232099	0.77035
ENSG00000166313.17	0.0328183	0.0419993
ENSG00000166428.11	0.00337905	0.886162
ENSG00000166507.15	-0.401722	0.274439
ENSG00000166575.15	0.00388493	0.754418
ENSG00000166763.7	-1.33991	0.3667
ENSG00000166816.12	-0.0128856	0.395816
ENSG00000166851.13	0.116437	0.177672
ENSG00000166856.2	-2.12977	0.0663781
ENSG00000166860.2	0.0209132	0.793031
ENSG00000166960.15	-0.0480648	0.697272
ENSG00000166971.15	0.000814064	0.966537
ENSG00000167094.14	-0.614618	0.186075
ENSG00000167105.6	0.0532779	0.042359
ENSG00000167106.10	-0.0145823	0.234069
ENSG00000167118.9	-0.000110662	0.992613
ENSG00000167220.10	0.00557207	0.834987
ENSG00000167280.15	-0.0656359	0.0989013
ENSG00000167281.17	-4.15725	0.196139
ENSG00000167311.12	-0.00382874	0.94289
ENSG00000167460.13	0.00162471	0.221255
ENSG00000167468.15	-1.19235e-05	0.991822
ENSG00000167513.7	0.0502489	0.420986
ENSG00000167535.6	-0.0163762	0.708565
ENSG00000167543.14	-0.0109947	0.474929
ENSG00000167549.17	-1.41272	0.0583449
ENSG00000167644.10	-0.00194208	0.695822
ENSG00000167645.15	-0.00454516	0.86705
ENSG00000167670.14	0.0285008	0.656011
ENSG00000167671.10	0.00553963	0.0772193
ENSG00000167748.9	-0.0332106	0.683284
ENSG00000167771.5	-0.584681	0.365502
ENSG00000167778.7	-0.00027932	0.978456
ENSG00000167863.10	-0.0027918	0.520619
ENSG00000167889.11	-0.667867	0.284272
ENSG00000167930.14	-5.39205e-05	0.993368
ENSG00000167967.14	-0.0534711	0.210185
ENSG00000167968.11	-1.03566	0.235188
ENSG00000167969.11	-0.00617847	0.325434
ENSG00000167984.15	-0.0883378	0.135568
ENSG00000168056.13	0.00169539	0.571768
ENSG00000168060.13	-0.0719768	0.57937
ENSG00000168061.12	-0.0561422	0.588009
ENSG00000168234.11	0.0109659	0.783149
ENSG00000168256.16	0.0373523	0.0550021
ENSG00000168268.9	0.00800787	0.689967
ENSG00000168350.7	-0.0384446	0.629668
ENSG00000168427.8	-0.0576527	0.78376
ENSG00000168477.16	-0.00505406	0.710385
ENSG00000168743.11	-0.00519681	0.399083
ENSG00000168802.11	0.0103297	0.310581
ENSG00000168827.13	-0.00237649	0.817916
ENSG00000168913.6	-0.554995	0.568692
ENSG00000168995.12	0.00820022	0.887303
ENSG00000169188.4	0.0634576	0.0686808
ENSG00000169258.6	0.0233569	0.629514
ENSG00000169372.11	0.0863	0.0231456
ENSG00000169583.12	-0.354791	0.209583
ENSG00000169641.12	-0.000942144	0.926676
ENSG00000169692.11	-0.00768201	0.459173
ENSG00000169718.16	-0.000287794	0.9783
ENSG00000169727.11	-0.000515713	0.941715
ENSG00000169764.13	0.0028069	0.562563
ENSG00000169885.8	-5.09143	0.177872
ENSG00000169962.4	-0.72715	0.448887
ENSG00000169972.10	-0.118569	0.259554
ENSG00000169994.17	0.00842469	0.560032
ENSG00000170035.14	0.0258677	0.0373461
ENSG00000170049.8	-1.35542	0.0279501
ENSG00000170075.8	-0.360524	0.622682
ENSG00000170085.16	0.0479435	0.325008
ENSG00000170142.10	-0.00720425	0.627059
ENSG00000170271.9	0.0175546	0.00485553
ENSG00000170291.13	-0.0159239	0.493005
ENSG00000170382.10	-0.00775556	0.692499
ENSG00000170423.11	-1.24277	0.662174
ENSG00000170473.15	0.0105393	0.745707
ENSG00000170684.7	-0.0746885	0.662364
ENSG00000170776.18	0.00537153	0.208235
ENSG00000170779.10	-0.102471	0.425899
ENSG00000171103.9	-0.00193877	0.972116
ENSG00000171262.10	0.011924	0.583339
ENSG00000171462.13	-0.00177986	0.988182
ENSG00000171603.15	0.0039818	0.0337428
ENSG00000171608.14	-0.00166321	0.922115
ENSG00000171777.14	0.0321492	0.823102
ENSG00000171817.15	-0.327604	0.0595437
ENSG00000171840.10	-0.0646116	0.604421
ENSG00000171889.3	-0.0189971	0.961975
ENSG00000172059.9	0.0263123	0.0647083
ENSG00000172247.3	-0.807409	0.515131
ENSG00000172346.13	-0.0194551	0.296251
ENSG00000172354.8	0.0049012	0.145464
ENSG00000172367.14	-0.0462844	0.396481
ENSG00000172460.13	0.330061	0.471301
ENSG00000172476.3	-0.258464	0.602939
ENSG00000172500.11	0.0132707	0.103747
ENSG00000172531.13	0.000950401	0.807201
ENSG00000172543.6	-0.0149579	0.48206
ENSG00000172575.10	-0.00354383	0.807502
ENSG00000172613.6	-0.0666562	0.299978
ENSG00000172640.3	-11.7735	0.177982
ENSG00000172650.11	-2.44187	0.180856
ENSG00000172725.12	0.00867028	0.36658
ENSG00000172889.14	-0.00521585	0.394043
ENSG00000172935.8	-0.0503121	0.572707
ENSG00000173011.11	-0.015923	0.442796
ENSG00000173124.13	-8.83802	0.123115
ENSG00000173137.10	-0.188228	0.165127
ENSG00000173145.10	-0.00173672	0.959056
ENSG00000173338.11	-0.505204	0.551717
ENSG00000173418.10	-0.00160391	0.898934
ENSG00000173442.10	0.000226836	0.98394
ENSG00000173482.15	0.00434178	0.109674
ENSG00000173846.11	-0.0067075	0.778057
ENSG00000173947.12	0.0590062	0.0424474
ENSG00000174243.8	0.0109097	0.311864
ENSG00000174292.11	0.0263467	0.633681
ENSG00000174521.7	-0.339049	0.759393
ENSG00000174606.11	0.0315806	0.254591
ENSG00000175130.6	0.00128322	0.82752
ENSG00000175206.9	-12.8528	0.023752
ENSG00000175592.7	-0.00247235	0.895989
ENSG00000175602.3	-0.00956396	0.668477
ENSG00000175634.13	-0.0278711	0.348927
ENSG00000176125.4	-0.294529	0.456774
ENSG00000176728.6	-0.0896862	0.593117
ENSG00000176871.7	0.00720949	0.145841
ENSG00000176884.13	-5.07392	0.237856
ENSG00000177045.7	0.044342	0.658802
ENSG00000177191.2	-0.0860616	0.381876
ENSG00000177370.4	0.0358631	0.363544
ENSG00000177485.6	-0.0053608	0.802908
ENSG00000177548.11	-0.00270789	0.897503
ENSG00000177628.14	0.0114724	0.0502697
ENSG00000177731.14	0.00512128	0.259787
ENSG00000177791.11	0.148321	0.353657
ENSG00000177839.6	0.23598	7.30961e-07
ENSG00000177954.10	0.00107466	0.21438
ENSG00000178028.12	-0.000494566	0.973525
ENSG00000178149.15	0.0162498	0.418219
ENSG00000178252.16	-0.00233659	0.740849
ENSG00000178297.11	-2.7624	0.0539993
ENSG00000178342.4	-3.5614	0.442197
ENSG00000178460.16	0.0336028	0.865903
ENSG00000178814.14	0.00698398	0.702419
ENSG00000178821.11	-0.408857	0.549421
ENSG00000178836.6	-4.29553	0.530074
ENSG00000178947.8	0.0113942	0.203891
ENSG00000179051.12	0.00876481	0.336457
ENSG00000179057.12	-0.22912	0.402722
ENSG00000179222.16	0.00630087	0.0463345
ENSG00000179262.8	0.0200632	0.0358613
ENSG00000179270.6	-0.330664	0.8955
ENSG00000179271.2	-0.00315006	0.638069
ENSG00000179299.15	-0.0833911	0.331444
ENSG00000179361.16	-0.212387	0.139945
ENSG00000179564.3	-0.0127614	0.99581
ENSG00000179832.16	-0.0414225	0.155758
ENSG00000179886.5	-0.0378191	0.493521
ENSG00000180061.8	-0.0223233	0.908255
ENSG00000180098.8	-0.00832701	0.801319
ENSG00000180279.5	0.0628532	0.97268
ENSG00000180385.7	-0.175634	0.607904
ENSG00000180448.9	-0.00604089	0.614042
ENSG00000180900.15	-0.00463828	0.709676
ENSG00000180929.5	-0.0631551	0.955673
ENSG00000181856.13	-0.175618	0.17591
ENSG00000181885.17	-0.00182402	0.715071
ENSG00000182048.10	0.0294974	0.280364
ENSG00000182179.9	-0.00263759	0.88165
ENSG00000182196.12	-0.431355	0.224925
ENSG00000182199.9	0.00583622	0.00798942
ENSG00000182484.13	-0.0730727	0.44635
ENSG00000182518.12	0.0362549	0.421744
ENSG00000182578.12	0.00194385	0.556048
ENSG00000182759.3	-27.0524	0.0343421
ENSG00000182796.11	-0.025541	0.667395
ENSG00000182866.15	-0.0149759	0.512419
ENSG00000183020.12	0.00373852	0.625905
ENSG00000183060.14	-0.12045	0.337851
ENSG00000183066.13	-0.167567	0.556548
ENSG00000183426.14	-0.292459	0.114892
ENSG00000183723.11	-0.00172098	0.624634
ENSG00000183773.14	-0.583881	0.175768
ENSG00000183793.12	0.243814	0.328778
ENSG00000183798.4	-0.968632	0.49691
ENSG00000183889.11	0.155457	0.89514
ENSG00000183963.17	-0.002709	0.723592
ENSG00000184058.11	-1.83679	0.274578
ENSG00000184209.14	-0.0181944	0.607843
ENSG00000184281.13	-0.0341063	0.271597
ENSG00000184343.9	-1.82865	0.0729915
ENSG00000184363.8	-0.00321794	0.914209
ENSG00000184481.15	0.0640324	0.06227
ENSG00000184575.10	0.00195302	0.821351
ENSG00000184697.6	0.00363827	0.997526
ENSG00000184860.8	-0.0188523	0.695617
ENSG00000184908.16	-0.00857197	0.602295
ENSG00000184956.14	-1.8174	0.0735889
ENSG00000184979.9	0.0639923	0.332241
ENSG00000184990.11	-0.0169123	0.289457
ENSG00000185038.13	0.00855915	0.480619
ENSG00000185133.12	-0.0511416	0.607088
ENSG00000185187.11	-0.0538978	0.0584823
ENSG00000185324.20	-0.0155607	0.183473
ENSG00000185340.14	-0.0102462	0.62975
ENSG00000185507.18	0.0194442	0.0896244
ENSG00000185519.8	0.0134398	0.565019
ENSG00000185567.6	-0.00066922	0.784255
ENSG00000185614.4	0.00848203	0.859779
ENSG00000185615.14	1.7374	0.0616049
ENSG00000185633.9	0.000500878	0.0309867
ENSG00000185792.8	-1.49216	0.57206
ENSG00000185838.12	-0.137051	0.486656
ENSG00000185864.15	-0.645215	0.0361924
ENSG00000185896.10	0.00179166	0.280625
ENSG00000185915.5	-2.36622	0.593102
ENSG00000186153.15	0.105368	0.00674835
ENSG00000186187.10	-0.012989	0.797147
ENSG00000186193.8	-0.146854	0.399838
ENSG00000186364.10	0.125224	0.0489315
ENSG00000186625.12	-0.0377385	0.495334
ENSG00000186897.4	-0.0113605	0.546208
ENSG00000186951.15	0.00437933	0.6358
ENSG00000187024.12	-0.412716	0.801557
ENSG00000187091.12	0.0150089	0.581271
ENSG00000187325.4	0.0145582	0.0675155
ENSG00000187479.5	0.00244464	0.630377
ENSG00000187583.9	-0.253082	0.135918
ENSG00000187595.13	0.104739	0.393122
ENSG00000187634.9	-0.133623	0.107119
ENSG00000187642.8	-0.000401777	0.984281
ENSG00000187682.1	-4.58442	0.321661
ENSG00000187838.15	-1.51663	0.125897
ENSG00000187848.11	-7.82939	0.338684
ENSG00000187980.6	-1.39802	0.447945
ENSG00000188002.9	-0.0570473	0.437513
ENSG00000188056.10	-1.45481	0.512335
ENSG00000188070.9	-0.007847	0.694916
ENSG00000188092.13	-0.21762	0.266315
ENSG00000188163.7	-0.436144	0.74859
ENSG00000188186.9	-0.00275722	0.637811
ENSG00000188229.5	-0.000400374	0.860912
ENSG00000188269.7	-0.795618	0.668816
ENSG00000188396.3	-0.808267	0.638268
ENSG00000188452.12	0.00874214	0.694186
ENSG00000188486.3	-0.0264033	0.460144
ENSG00000188505.4	-0.436123	0.541611
ENSG00000188525.3	-4.187	0.493843
ENSG00000188613.6	0.180895	0.283408
ENSG00000188779.9	-1.19458	0.294313
ENSG00000188786.9	0.0205022	0.524911
ENSG00000188976.9	0.0078836	0.576063
ENSG00000189046.9	0.0104107	0.755087
ENSG00000189077.9	0.00226132	0.752411
ENSG00000189269.11	-1.86322	0.0963972
ENSG00000189350.11	-1.22575	0.14547
ENSG00000189409.11	-0.737435	0.744439
ENSG00000196110.6	-0.137094	0.307994
ENSG00000196123.11	-0.033718	0.177245
ENSG00000196169.13	-0.113063	0.662084
ENSG00000196187.10	0.00829332	0.0251031
ENSG00000196296.12	-0.505943	0.165196
ENSG00000196305.16	0.00163936	0.796661
ENSG00000196396.8	0.0048584	0.346852
ENSG00000196405.11	-0.0120929	0.251197
ENSG00000196436.8	-0.215944	0.280207
ENSG00000196455.6	0.0211626	0.254868
ENSG00000196497.14	0.0345211	0.708136
ENSG00000196511.12	0.016028	0.456576
ENSG00000196517.10	0.033209	0.603379
ENSG00000196557.9	0.00195501	0.438736
ENSG00000196562.13	0.000807961	0.561087
ENSG00000196588.13	0.00671017	0.545567
ENSG00000196666.4	-20.3982	0.0962544
ENSG00000196696.11	-0.334862	0.0414961
ENSG00000196700.6	-0.00381701	0.873119
ENSG00000196878.11	0.00202147	0.360057
ENSG00000196950.12	0.016121	0.310048
ENSG00000196976.6	0.0104918	0.719222
ENSG00000196979.1	-0.597952	0.56725
ENSG00000197226.11	0.0125067	0.00058618
ENSG00000197586.11	-0.00250709	0.780351
ENSG00000197614.9	0.0310511	0.614006
ENSG00000197629.5	-0.00227609	0.718328
ENSG00000197746.12	0.00026613	0.284068
ENSG00000197753.8	-3.58414	0.325354
ENSG00000197785.12	-0.00986161	0.727154
ENSG00000197885.9	-0.132084	0.141176
ENSG00000197893.12	0.031083	0.585645
ENSG00000197956.8	-0.000404604	0.654721
ENSG00000197982.13	-0.00969113	0.650914
ENSG00000197989.12	-0.0163127	0.586911
ENSG00000197993.6	-2.42109	0.132512
ENSG00000198026.7	-0.0612906	0.129017
ENSG00000198033.10	0.553237	0.0260906
ENSG00000198089.13	-0.0972088	0.0552887
ENSG00000198208.10	0.0133714	0.782277
ENSG00000198231.11	0.01529	0.124227
ENSG00000198252.10	-0.0148366	0.693593
ENSG00000198467.12	1.12597e-05	0.995055
ENSG00000198517.8	-0.00212446	0.865271
ENSG00000198643.5	-0.119686	0.888136
ENSG00000198646.12	0.00807239	0.521069
ENSG00000198720.11	-0.0403379	0.594014
ENSG00000198832.9	-0.00489647	0.436941
ENSG00000198853.10	0.0144605	0.173071
ENSG00000198931.9	0.00128442	0.809229
ENSG00000198937.8	-0.0105288	0.750265
ENSG00000198944.5	0.0243866	0.817834
ENSG00000198951.10	0.0010223	0.940312
ENSG00000200378.1	2.14917	0.384604
ENSG00000201440.1	1.99526	0.380071
ENSG00000202343.1	0.0773899	0.948891
ENSG00000202533.1	-1.60657	0.378535
ENSG00000203667.8	0.0996426	0.150203
ENSG00000203734.10	-4.26461	0.058563
ENSG00000203772.7	-0.419366	0.183363
ENSG00000203804.4	-0.858055	0.445397
ENSG00000204033.8	0.270054	0.784128
ENSG00000204084.11	-0.0194518	0.652684
ENSG00000204165.5	-4.36029	0.0516076
ENSG00000204172.10	-0.400958	0.0576191
ENSG00000204290.9	-0.750671	0.706829
ENSG00000204396.9	0.0139359	0.745819
ENSG00000204420.7	0.0882024	0.908772
ENSG00000204421.2	-8.03343	0.313453
ENSG00000204475.8	-0.37932	0.428415
ENSG00000204482.9	-0.0192768	0.41636
ENSG00000204560.8	0.00046878	0.988296
ENSG00000204564.10	-0.0377566	0.39193
ENSG00000204618.7	0.307214	0.0418955
ENSG00000204619.6	0.00865525	0.48405
ENSG00000204644.8	-0.384472	0.349556
ENSG00000204791.7	-0.136981	0.89614
ENSG00000205090.7	0.120456	0.888965
ENSG00000205643.9	-0.0368446	0.59682
ENSG00000205702.9	-1.42382	0.11086
ENSG00000205744.8	0.00531178	0.658196
ENSG00000206384.9	-3.75683	0.19241
ENSG00000206530.7	-0.102463	0.230524
ENSG00000206561.11	-0.572832	0.0782925
ENSG00000206567.8	-0.370509	0.30312
ENSG00000206739.1	-12.1609	0.130896
ENSG00000207721.1	-2.07735	0.240362
ENSG00000207864.2	-2.39128	0.387975
ENSG00000208018.1	-13.7542	0.164197
ENSG00000210195.2	-1.92189	0.22237
ENSG00000210196.2	-0.00425907	0.387177
ENSG00000211445.10	0.000136516	0.162232
ENSG00000211450.8	-0.00910148	0.404136
ENSG00000211584.12	-0.00407896	0.820751
ENSG00000213071.9	-0.199864	0.673771
ENSG00000213373.6	-0.0335443	0.143471
ENSG00000213590.2	-6.67883	0.108366
ENSG00000213694.3	0.00251458	0.629482
ENSG00000213722.7	0.0169484	0.118036
ENSG00000213880.3	-3.37947	0.217682
ENSG00000213937.3	-0.00601323	0.982257
ENSG00000214595.10	0.000864222	0.969069
ENSG00000214655.9	0.00156574	0.909426
ENSG00000214706.9	-0.0123211	0.551515
ENSG00000214733.7	-5.37424	0.264278
ENSG00000214765.7	-0.218629	0.0353643
ENSG00000214860.4	-0.869857	0.553354
ENSG00000214867.3	-0.103122	0.883495
ENSG00000214946.12	-5.28139	0.388707
ENSG00000215187.8	-1.38782	0.275269
ENSG00000215458.7	-0.771304	0.289853
ENSG00000215859.7	0.680153	0.0323755
ENSG00000215914.4	-0.616035	0.7379
ENSG00000217442.3	-0.2916	0.610811
ENSG00000218537.1	-0.111977	0.726183
ENSG00000219433.2	-3.57091	0.444278
ENSG00000220848.4	-0.115029	0.651348
ENSG00000221539.1	-1.42203	0.321736
ENSG00000221821.3	-0.0475036	0.670266
ENSG00000221869.4	-0.00428031	0.347121
ENSG00000222448.1	-4.15068	0.193994
ENSG00000223403.3	0.0127298	0.956536
ENSG00000223572.8	-0.15739	0.404228
ENSG00000223705.8	-0.0790737	0.217352
ENSG00000223764.2	-0.27161	0.0598343
ENSG00000223802.6	-1.41786	0.256129
ENSG00000224016.2	-0.0719438	0.976544
ENSG00000224066.1	-2.80847	0.153572
ENSG00000224712.9	0.0803219	0.898114
ENSG00000224961.1	0.816568	0.777961
ENSG00000224976.2	-0.742204	0.674202
ENSG00000225031.1	0.0876995	0.351683
ENSG00000225419.1	0.0898126	0.978243
ENSG00000225526.4	-2.89385	0.107179
ENSG00000225531.1	-3.00315	0.547045
ENSG00000225840.2	-0.89697	0.46883
ENSG00000225872.2	-1.51745	0.302403
ENSG00000225889.6	-0.148311	0.222918
ENSG00000225969.1	0.0013372	0.98864
ENSG00000226054.2	-0.49672	0.586998
ENSG00000226055.2	-2.12065	0.402237
ENSG00000226686.6	-1.12027	0.230239
ENSG00000226950.5	-0.0160974	0.577846
ENSG00000227039.5	-0.302733	0.136249
ENSG00000227066.1	-0.344214	0.742682
ENSG00000227070.1	-8.46335	0.108952
ENSG00000227218.6	-0.942798	0.337148
ENSG00000227473.1	0.755216	0.527468
ENSG00000227620.4	0.164135	0.971967
ENSG00000227632.2	0.0910038	0.896715
ENSG00000227741.1	-2.18649	0.169824
ENSG00000227802.1	-2.94944	0.443468
ENSG00000228071.4	0.230036	0.840718
ENSG00000228133.2	-4.15426	0.381823
ENSG00000228278.3	-1.34525	0.61365
ENSG00000228474.4	0.00375657	0.367538
ENSG00000228727.7	-2.34117	0.0676957
ENSG00000228888.1	0.0546991	0.632355
ENSG00000228962.1	0.00511655	0.99139
ENSG00000229122.1	-3.69752	0.0907007
ENSG00000229407.4	1.49568	0.0726167
ENSG00000229720.1	-0.221615	0.806327
ENSG00000229939.1	0.256245	0.41251
ENSG00000229980.4	-0.116544	0.661335
ENSG00000230262.5	-12.8906	0.00963579
ENSG00000230646.1	-5.03721	0.366486
ENSG00000230929.5	0.00501326	0.996185
ENSG00000231177.4	-0.687353	0.393386
ENSG00000231672.5	0.0604835	0.524285
ENSG00000231760.4	-0.303328	0.603729
ENSG00000231852.5	-0.203193	0.418447
ENSG00000231979.1	-0.340172	0.770105
ENSG00000232218.1	-1.60196	0.666648
ENSG00000232271.1	0.0538804	0.654063
ENSG00000232608.1	-10.2939	0.224294
ENSG00000232677.5	0.0636968	0.0216831
ENSG00000232742.3	0.327798	0.646707
ENSG00000233024.6	-2.86532	0.551389
ENSG00000233101.9	-0.0845312	0.450613
ENSG00000233330.1	-0.522655	0.550212
ENSG00000233337.1	-4.21703	0.138533
ENSG00000233381.3	2.12981	0.19296
ENSG00000233427.1	4.15206	0.296293
ENSG00000233436.6	-8.7921	0.0794874
ENSG00000233622.1	0.00173111	0.994808
ENSG00000233677.1	2.20789	0.667592
ENSG00000233783.6	-6.05018	0.298965
ENSG00000233884.1	-0.640955	0.838949
ENSG00000233885.6	-0.196219	0.609011
ENSG00000234020.1	2.38456	0.221918
ENSG00000234026.1	-1.31744	0.500207
ENSG00000234160.1	-0.012416	0.907832
ENSG00000234290.2	-0.431277	0.0588722
ENSG00000234345.2	-7.14894	0.201061
ENSG00000234354.3	-0.995333	0.612939
ENSG00000234405.1	-0.792563	0.684152
ENSG00000234409.6	-0.606328	0.365627
ENSG00000234575.1	-1.81992	0.62913
ENSG00000234769.7	-0.628893	0.489268
ENSG00000234776.3	-3.13527	0.478897
ENSG00000234848.1	-6.56764	0.253597
ENSG00000235079.1	-2.07287	0.265145
ENSG00000235173.5	0.00747425	0.768247
ENSG00000235194.7	-0.0484854	0.243657
ENSG00000235663.1	-0.314504	0.837357
ENSG00000235821.1	0.0166138	0.987295
ENSG00000235961.5	0.0271993	0.197396
ENSG00000235963.1	-1.60515	0.756289
ENSG00000235979.7	-3.31947	0.404917
ENSG00000236194.3	-5.26526	0.258396
ENSG00000236397.3	-0.188471	0.657196
ENSG00000236675.1	0.361015	0.000725793
ENSG00000236830.5	-0.922281	0.198313
ENSG00000237101.1	-0.587174	0.58348
ENSG00000237172.3	0.0123577	0.333448
ENSG00000237190.3	2.51255e-05	0.998432
ENSG00000237214.3	0.0517267	0.657157
ENSG00000237264.4	0.28776	0.623249
ENSG00000237517.7	0.00265114	0.551326
ENSG00000237807.3	0.0852899	0.746606
ENSG00000238151.1	-6.09229	0.209322
ENSG00000238171.1	-2.20529	0.401763
ENSG00000238178.5	-0.102216	0.688304
ENSG00000238271.2	0.00561716	0.98936
ENSG00000238279.1	0.0212977	0.957356
ENSG00000239264.7	0.048451	0.19766
ENSG00000239480.1	-10.8068	0.121668
ENSG00000239486.1	-1.74944	0.234748
ENSG00000239779.5	-0.0166579	0.738611
ENSG00000239969.4	-1.30837	0.323857
ENSG00000240288.6	-2.46772	0.0916568
ENSG00000240338.4	-1.32378	0.668429
ENSG00000240665.1	1.23923	0.528039
ENSG00000240710.1	-3.14396	0.25214
ENSG00000240729.1	-5.15021	0.430478
ENSG00000240972.1	-0.00373089	0.589563
ENSG00000241527.1	-1.62975	0.517318
ENSG00000241878.8	-0.0499266	0.0777692
ENSG00000242252.1	-1.53558	0.105424
ENSG00000242852.5	-0.849922	0.421807
ENSG00000242952.1	-2.39391	0.534185
ENSG00000242953.1	0.571748	0.721857
ENSG00000243708.7	-2.28659	0.0670252
ENSG00000243716.9	-0.173846	0.238895
ENSG00000243960.1	-7.81571	0.0664044
ENSG00000244038.8	0.00585619	0.0182546
ENSG00000244165.1	-0.192195	0.172448
ENSG00000244383.1	0.501361	0.533798
ENSG00000244607.4	0.0554022	0.777944
ENSG00000244953.1	-1.23793	0.182326
ENSG00000245317.2	0.228797	0.229818
ENSG00000245910.7	-0.00790472	0.530539
ENSG00000246548.3	-2.26644	0.240163
ENSG00000246596.5	-0.319366	0.564813
ENSG00000247679.2	-0.130703	0.638649
ENSG00000247728.2	-7.46263	0.0914283
ENSG00000248114.1	-3.47755	0.598983
ENSG00000248126.1	-0.328624	0.86532
ENSG00000248309.4	-0.500874	0.547588
ENSG00000248375.1	3.97575	0.0975621
ENSG00000248559.1	-3.47111	0.177127
ENSG00000248705.1	-3.9344	0.31734
ENSG00000248712.6	-0.192966	0.535585
ENSG00000249035.5	-1.74685	0.421997
ENSG00000249258.2	-12.3819	0.0429269
ENSG00000249635.1	-11.1082	0.0300023
ENSG00000249751.3	-0.00356028	0.880265
ENSG00000250794.2	0.914147	0.727301
ENSG00000250906.1	-4.86903	0.141343
ENSG00000250979.1	-1.84489	0.189077
ENSG00000251179.1	0.192245	0.734151
ENSG00000251271.3	-9.01354	0.186093
ENSG00000251599.1	-0.017729	0.881552
ENSG00000251603.1	0.0712913	0.880939
ENSG00000251669.4	0.10325	0.572102
ENSG00000252202.1	-2.10495	0.526687
ENSG00000252335.1	-2.12784	0.657043
ENSG00000253304.1	0.0277095	0.439675
ENSG00000253317.1	-2.27778	0.201068
ENSG00000253641.4	-1.98755	0.0680629
ENSG00000253649.2	-1.68393	0.126591
ENSG00000253708.1	-8.54592	0.22982
ENSG00000253755.1	-0.000729496	0.849792
ENSG00000254338.1	-3.26002	0.330503
ENSG00000254429.1	-0.604494	0.86685
ENSG00000254521.5	-0.307552	0.434758
ENSG00000254605.1	-0.0930582	0.758103
ENSG00000254777.4	-15.1412	0.0650011
ENSG00000254802.1	-1.11971	0.594897
ENSG00000254978.2	-2.68705	0.308688
ENSG00000255191.1	-0.127779	0.907317
ENSG00000255200.1	-1.31492	0.100857
ENSG00000255282.5	-0.219668	0.790379
ENSG00000255366.1	-0.396326	0.527502
ENSG00000255478.1	-0.955396	0.863742
ENSG00000255730.3	3.18015	0.0343905
ENSG00000255769.6	-0.0653217	0.813361
ENSG00000255823.2	-0.598	0.14217
ENSG00000255864.4	-2.51029	0.266025
ENSG00000255867.1	-7.21494	0.133601
ENSG00000255967.1	-0.299436	0.741136
ENSG00000256028.2	-1.95485	0.126754
ENSG00000256210.3	0.521951	0.488946
ENSG00000256269.5	-0.0372621	0.314383
ENSG00000256943.1	-1.25653	0.439442
ENSG00000257283.1	-0.12155	0.959319
ENSG00000257337.5	-0.0567875	0.323147
ENSG00000257390.4	-1.00295	0.752422
ENSG00000257475.2	-7.65202	0.164049
ENSG00000257727.4	-0.0123573	0.675074
ENSG00000257740.1	-1.95862	0.280861
ENSG00000257989.1	-0.048274	0.539772
ENSG00000258130.6	-0.746021	0.726238
ENSG00000258301.3	-1.27958	0.205491
ENSG00000258315.4	-0.045851	0.925095
ENSG00000258405.8	-0.439855	0.587198
ENSG00000258427.3	0.0854574	0.938914
ENSG00000258539.1	-0.302836	0.865721
ENSG00000258558.1	-15.2391	0.154284
ENSG00000258626.2	0.508213	0.399572
ENSG00000258727.1	-0.496635	0.0582586
ENSG00000258819.1	0.0247576	0.868019
ENSG00000258890.5	-0.0471334	0.134645
ENSG00000259040.4	-0.0965283	0.798396
ENSG00000259399.1	-2.50518	0.538124
ENSG00000259522.2	1.36313	0.815549
ENSG00000259605.3	-1.26935	0.19442
ENSG00000259762.1	0.523477	0.842492
ENSG00000259803.5	-4.17301	0.359688
ENSG00000259807.1	-0.57946	0.61292
ENSG00000259895.1	-20.4917	0.0770885
ENSG00000259933.5	-1.39042	0.338454
ENSG00000260001.5	-0.42782	0.730316
ENSG00000260027.4	-0.00617215	0.76519
ENSG00000260105.5	-3.26358	0.0521177
ENSG00000260190.1	-6.18136	0.0992112
ENSG00000260201.2	0.305852	0.481759
ENSG00000260238.4	0.170919	0.74032
ENSG00000260500.1	-3.7878	0.254861
ENSG00000260517.2	-2.07449	0.226434
ENSG00000260645.1	-4.83677	0.0324115
ENSG00000260660.1	2.13973	0.214735
ENSG00000260762.1	-0.138982	0.77045
ENSG00000260779.1	-4.37815	0.452305
ENSG00000261052.4	-5.02233	0.47149
ENSG00000261123.1	-1.76656	0.264995
ENSG00000261295.1	0.363946	0.0824837
ENSG00000261456.4	-3.8387	0.375088
ENSG00000261548.1	-3.34891	0.165949
ENSG00000261659.2	-0.349613	0.459662
ENSG00000261668.1	-2.86729	0.116993
ENSG00000261707.1	-2.2578	0.295092
ENSG00000261884.2	-0.765716	0.0401832
ENSG00000261924.1	-2.93133	0.31373
ENSG00000262006.1	-9.00859	0.139897
ENSG00000262052.1	-0.263358	0.943228
ENSG00000262877.4	-0.00781941	0.932701
ENSG00000262943.6	-0.817388	0.170234
ENSG00000263011.1	-1.74013	0.434193
ENSG00000263050.1	-0.298459	0.682146
ENSG00000263214.1	-0.306576	0.642061
ENSG00000263316.1	-4.20373	0.279968
ENSG00000263370.1	-4.12221	0.3839
ENSG00000263429.3	0.091482	0.97073
ENSG00000263946.1	-3.67343	0.333122
ENSG00000263970.1	0.143158	0.902483
ENSG00000264635.1	-9.40769	0.0373784
ENSG00000265912.1	-1.41263	0.451679
ENSG00000266171.1	-4.72845	0.106761
ENSG00000266289.1	-0.409835	0.778999
ENSG00000266402.3	-1.54843	0.316356
ENSG00000266733.4	-8.06247	0.118995
ENSG00000266957.1	-8.69008	0.168044
ENSG00000266973.1	1.27673	0.473261
ENSG00000267053.5	-0.81779	0.47598
ENSG00000267074.1	-1.28671	0.125429
ENSG00000267363.1	4.49347	0.0465015
ENSG00000267369.1	-0.506566	0.195388
ENSG00000267383.5	-0.455703	0.573532
ENSG00000267405.1	1.04248	0.475699
ENSG00000267466.1	0.617049	0.132196
ENSG00000267480.1	-0.0200607	0.8579
ENSG00000267484.1	-0.654838	0.797779
ENSG00000267505.1	-0.212701	0.824296
ENSG00000267506.4	0.420025	0.219792
ENSG00000267510.1	-0.0276095	0.965581
ENSG00000267605.4	-4.05447	0.0824381
ENSG00000267694.1	-1.24101	0.52298
ENSG00000267724.1	-1.46265	0.308685
ENSG00000267748.4	-0.283108	0.822556
ENSG00000267758.1	-9.23801	0.194887
ENSG00000268575.1	-0.443528	0.168014
ENSG00000268883.2	0.735549	0.0133612
ENSG00000268903.1	-0.222981	0.696392
ENSG00000268938.2	-4.77838	0.231167
ENSG00000268970.1	-0.300084	0.582048
ENSG00000269072.1	-4.59113	0.283619
ENSG00000269349.1	2.48938	0.518267
ENSG00000269514.1	-2.20882	0.123512
ENSG00000269656.1	1.30165	0.446621
ENSG00000269858.4	-0.139993	0.0503843
ENSG00000269893.5	-0.000326377	0.974704
ENSG00000269930.1	-5.29684	0.286492
ENSG00000269982.1	-0.136069	0.591531
ENSG00000270074.1	1.57158	0.610565
ENSG00000270402.1	-2.23331	0.486328
ENSG00000270433.1	-5.71118	0.190103
ENSG00000270510.1	-1.33717	0.426564
ENSG00000270706.1	0.144242	0.948871
ENSG00000270765.4	0.170368	0.00183068
ENSG00000270882.2	0.336907	0.845236
ENSG00000270885.1	0.0972546	0.1133
ENSG00000270947.1	-0.83977	0.716998
ENSG00000271553.1	-1.8333	0.0567511
ENSG00000271787.1	-0.0267763	0.939264
ENSG00000271913.4	-0.703936	0.262967
ENSG00000272006.1	-3.4285	0.425564
ENSG00000272034.1	-2.77079	0.125364
ENSG00000272087.1	-0.978738	0.17788
ENSG00000272112.1	0.159836	0.704355
ENSG00000272121.1	-1.35921	0.615676
ENSG00000272148.1	-2.2479	0.267282
ENSG00000272223.1	-1.23551	0.336094
ENSG00000272333.4	-0.0138187	0.41526
ENSG00000272379.1	-4.23715	0.563371
ENSG00000272391.4	0.0507588	0.00793932
ENSG00000272438.1	-8.13976	0.210513
ENSG00000272645.2	-0.219183	0.191396
ENSG00000272689.1	-1.66513	0.597806
ENSG00000272724.1	-0.211158	0.514629
ENSG00000272791.1	-0.824949	0.521202
ENSG00000272821.1	-0.209659	0.156375
ENSG00000272829.1	-1.92543	0.241437
ENSG00000273027.1	0.0835251	0.883516
ENSG00000273073.1	-0.408151	0.79904
ENSG00000273226.1	-0.260259	0.487261
ENSG00000273265.1	0.0585535	0.89585
ENSG00000273311.1	-0.172766	0.587696
ENSG00000273350.1	-1.36181	0.40805
ENSG00000274363.1	-2.20938	0.373564
ENSG00000274736.3	-0.617242	0.567398
ENSG00000275793.1	-0.0622571	0.951332
ENSG00000276742.1	0.311618	0.887418
ENSG00000276772.1	-0.333869	0.633869
ENSG00000277358.1	0.685421	0.362997
ENSG00000277877.3	-0.246741	0.573248
ENSG00000278075.1	-0.122219	0.947199
ENSG00000278603.1	-7.09074	0.15476
ENSG00000278932.2	-0.64759	0.739985
ENSG00000278978.1	-0.00994949	0.931357
ENSG00000279117.1	0.00345599	0.915986
ENSG00000279208.1	-2.7135	0.431891
ENSG00000279332.1	-0.423285	0.560818
ENSG00000279375.1	1.8514	0.00243493
ENSG00000279464.1	-0.868115	0.355843
ENSG00000279484.1	-0.312107	0.778353
ENSG00000279774.1	-3.62661	0.349382
ENSG00000279792.1	-2.49788	0.1639
ENSG00000279802.1	-2.85559	0.387983
ENSG00000279810.1	-1.15094	0.579127
ENSG00000280169.1	0.131849	0.862201
ENSG00000280212.1	-5.94278	0.0672305
ENSG00000280213.1	-1.36371	0.122412
ENSG00000280328.1	-0.738247	0.135978
ENSG00000280560.1	-8.21289	0.204418
ENSG00000281538.1	-1.52371	0.273865
ENSG00000281691.1	-1.42297	0.459104
ENSG00000281719.1	0.0294265	0.987177

## Sheet: CG.DFI.KIRP
Gene	Coefficient	Logrank p-value
ENSG00000002330.12	-0.0105668	0.3236
ENSG00000004487.14	0.0178872	0.126802
ENSG00000004534.13	-0.000591735	0.892862
ENSG00000004777.17	0.0246763	0.44278
ENSG00000004864.12	-0.00156796	0.862809
ENSG00000004975.10	-0.0298969	0.0623218
ENSG00000005007.11	-0.00280102	0.710828
ENSG00000005059.14	-0.0173126	0.551548
ENSG00000006007.10	-0.00582853	0.366692
ENSG00000006047.11	-0.0306385	0.327392
ENSG00000006282.18	-0.000451033	0.876655
ENSG00000006283.16	0.472827	0.411876
ENSG00000008056.11	-0.0419781	0.656081
ENSG00000008083.12	0.04145	0.141358
ENSG00000008118.8	-0.196399	0.293476
ENSG00000008256.14	-0.0217354	0.178798
ENSG00000008323.14	0.0228505	0.114005
ENSG00000008438.4	0.345023	0.853862
ENSG00000008441.15	0.00184343	0.788972
ENSG00000009724.15	-0.209167	0.346108
ENSG00000010327.9	0.0015448	0.527387
ENSG00000011009.9	-0.0152523	0.0115952
ENSG00000011143.15	-0.0341386	0.164138
ENSG00000011304.15	0.00487763	0.280434
ENSG00000012211.11	0.0525189	0.0130112
ENSG00000013306.14	-0.00202783	0.355361
ENSG00000015532.8	-0.00663804	0.412727
ENSG00000016402.11	0.0560408	0.00035173
ENSG00000016864.15	-0.0188138	0.176968
ENSG00000019102.10	0.00780132	0.0216182
ENSG00000019144.15	1.02292e-05	0.99822
ENSG00000025708.11	-0.00109453	0.752405
ENSG00000029639.9	-0.118001	0.0827414
ENSG00000030582.15	0.000627578	0.00789125
ENSG00000033100.13	-0.000622064	0.93008
ENSG00000035681.6	0.0452923	0.0193747
ENSG00000035720.6	-0.00393909	0.74152
ENSG00000037042.8	-0.00510862	0.77496
ENSG00000042062.10	-0.0243272	0.220821
ENSG00000047579.18	-0.0120873	0.673137
ENSG00000047849.20	-0.00699622	0.00159378
ENSG00000048462.9	0.0599685	0.32396
ENSG00000050426.14	-0.00309104	0.735024
ENSG00000050820.15	-0.00993932	0.00203977
ENSG00000052344.14	-0.00370574	0.289094
ENSG00000054983.15	-0.0109512	0.505764
ENSG00000055211.11	-0.000843177	0.872579
ENSG00000059691.10	-0.0279164	0.0118059
ENSG00000059915.15	-0.0387028	0.751743
ENSG00000061273.16	-0.00131622	0.805745
ENSG00000062096.13	0.0434908	0.153112
ENSG00000062282.13	0.0152331	0.109868
ENSG00000062524.14	-0.0145291	0.781462
ENSG00000064012.20	0.0470367	0.00288483
ENSG00000064309.13	0.019826	0.320452
ENSG00000064601.15	-0.000213453	0.784175
ENSG00000064932.14	0.000153994	0.975536
ENSG00000065320.7	-0.00255403	0.78538
ENSG00000065923.8	0.00525103	0.579045
ENSG00000067182.6	-0.000972083	0.775738
ENSG00000067704.9	0.00284351	0.476395
ENSG00000067829.17	-0.00903087	0.159254
ENSG00000068137.13	0.0146705	0.0794693
ENSG00000068305.16	8.67352e-05	0.991894
ENSG00000068383.17	-0.00404664	0.896289
ENSG00000068615.15	0.0344925	0.539013
ENSG00000069424.13	-0.0031401	0.615032
ENSG00000070047.10	0.019898	0.189996
ENSG00000070985.12	-0.0309273	0.746689
ENSG00000071282.10	0.0351473	0.0383741
ENSG00000072163.17	-0.00100175	0.920991
ENSG00000072518.19	-0.00679894	0.622058
ENSG00000072736.17	-0.0040595	0.875884
ENSG00000072778.18	-0.004346	2.57676e-05
ENSG00000074276.9	-0.00211947	0.398293
ENSG00000075975.14	-0.0358277	0.174602
ENSG00000076067.10	-0.0274397	0.0016567
ENSG00000076108.10	0.00283369	0.482029
ENSG00000076344.14	0.038651	0.402492
ENSG00000076706.13	0.000682387	0.750405
ENSG00000077092.17	0.0206349	0.352107
ENSG00000077097.12	0.00190661	0.547349
ENSG00000077150.16	0.00630702	0.131366
ENSG00000078061.11	0.00402078	0.638377
ENSG00000078814.14	-0.106527	0.254012
ENSG00000081181.6	-0.0105499	0.50163
ENSG00000082014.15	-0.0189792	0.0427182
ENSG00000083812.10	-0.166546	0.121853
ENSG00000084693.14	-0.0126627	0.260111
ENSG00000084754.9	-0.00155246	0.30921
ENSG00000086159.11	-0.0134211	0.720966
ENSG00000087087.17	0.00709313	0.229037
ENSG00000087191.11	0.00131289	0.600494
ENSG00000088038.16	0.0384359	0.0663654
ENSG00000089050.13	-0.00584532	0.582929
ENSG00000089163.4	-0.209679	0.261387
ENSG00000089486.15	-0.0149996	0.00809822
ENSG00000089820.14	0.00168797	0.762654
ENSG00000090097.19	-0.0270089	0.110661
ENSG00000090975.11	-0.0114291	0.568597
ENSG00000091622.14	-0.190515	0.064169
ENSG00000092010.13	0.00407737	0.0992922
ENSG00000092051.15	0.232371	0.259136
ENSG00000092108.19	0.00519606	0.809331
ENSG00000092758.14	0.0253839	0.139351
ENSG00000092820.16	-0.00120486	0.00988331
ENSG00000093144.17	1.30847e-05	0.999063
ENSG00000096063.13	0.035021	0.00724103
ENSG00000096384.18	0.000124539	0.0228697
ENSG00000099365.8	-0.0411677	0.548119
ENSG00000099377.12	-0.00661107	0.225222
ENSG00000099795.5	0.00126965	0.576536
ENSG00000099797.10	0.00333958	0.455156
ENSG00000099800.6	-0.00532085	0.453867
ENSG00000099817.10	-0.00857114	0.0291795
ENSG00000099821.12	-0.00717998	0.555879
ENSG00000099822.2	-0.00416738	0.817282
ENSG00000099899.13	0.0265274	0.0835273
ENSG00000099904.14	-0.025256	0.0279475
ENSG00000099956.16	-0.00811788	0.315255
ENSG00000099957.15	0.0526769	0.461071
ENSG00000099958.13	0.0146307	0.194051
ENSG00000099960.11	0.0760642	0.00285309
ENSG00000100078.3	0.300099	0.884303
ENSG00000100079.6	0.00321523	0.0842469
ENSG00000100139.12	0.00211716	0.717457
ENSG00000100196.9	0.00148801	0.908585
ENSG00000100201.17	4.55902e-05	0.963786
ENSG00000100220.10	-0.00198251	0.719823
ENSG00000100239.14	-0.0131655	0.261019
ENSG00000100241.19	-0.00875586	0.0788316
ENSG00000100276.9	0.0720776	0.553663
ENSG00000100359.19	-0.0129346	0.388503
ENSG00000100417.10	-0.0149419	0.151037
ENSG00000100433.14	0.0684666	0.730782
ENSG00000100522.7	0.00839102	0.56839
ENSG00000100767.14	-0.00162023	0.43008
ENSG00000100908.12	0.0399803	0.120306
ENSG00000100918.11	0.0039322	0.666695
ENSG00000100979.13	0.000473123	0.609744
ENSG00000100982.10	-0.0350696	0.017309
ENSG00000100991.10	-0.000304228	0.972841
ENSG00000101003.9	0.168938	1.35661e-05
ENSG00000101004.13	-0.0126048	0.253996
ENSG00000101082.12	0.0333873	0.0414589
ENSG00000101084.15	0.0242447	0.0856244
ENSG00000101158.11	0.00171758	0.836596
ENSG00000101160.12	-0.00122126	0.18024
ENSG00000101190.11	0.0246877	0.285414
ENSG00000101220.16	0.0102493	0.247212
ENSG00000101298.12	-0.0529428	0.0575605
ENSG00000101343.13	0.0362264	0.0334363
ENSG00000101384.10	0.00327071	0.119701
ENSG00000101460.11	-0.016834	0.249481
ENSG00000101464.9	0.0203128	0.0928701
ENSG00000101882.8	0.0787006	0.00121432
ENSG00000102007.9	-0.00433124	0.489222
ENSG00000102109.8	-0.0032558	0.277938
ENSG00000102144.12	-0.000432995	0.523778
ENSG00000102302.7	0.0531013	0.0442234
ENSG00000102362.14	0.023521	0.445899
ENSG00000102710.18	0.0137459	0.411822
ENSG00000102854.13	-0.00103539	0.59866
ENSG00000102978.11	-0.00911145	0.154814
ENSG00000102984.13	-0.285964	0.054719
ENSG00000103024.6	-0.00430516	0.448374
ENSG00000103044.9	0.0205675	0.000162524
ENSG00000103067.10	0.00590806	0.385087
ENSG00000103111.13	-0.0222975	0.0357369
ENSG00000103126.13	-0.0235001	0.0544942
ENSG00000103264.14	-0.0715546	0.0086614
ENSG00000103351.11	-0.0214395	0.129446
ENSG00000103415.10	-0.0118395	0.136223
ENSG00000103426.11	-2.47695	0.311536
ENSG00000103479.13	-0.00571161	0.358924
ENSG00000103510.18	-0.0131143	0.35768
ENSG00000104341.15	0.00226582	0.318052
ENSG00000104524.12	0.000944829	0.954022
ENSG00000104660.16	0.010972	0.161649
ENSG00000104679.9	0.00265341	0.862803
ENSG00000104859.13	0.0106174	0.359034
ENSG00000104903.4	0.034727	0.321489
ENSG00000104936.16	-0.00413774	0.687389
ENSG00000104964.13	-0.00256659	0.10431
ENSG00000105135.14	0.00207045	0.544145
ENSG00000105137.11	-0.0162415	0.481135
ENSG00000105258.7	-0.0122262	0.470071
ENSG00000105325.12	-0.0193849	0.316006
ENSG00000105355.7	-0.0121533	0.149151
ENSG00000105364.12	0.000836944	0.929105
ENSG00000105373.17	-0.000590684	0.706447
ENSG00000105556.9	0.0247812	0.25653
ENSG00000105617.3	-0.030251	0.60353
ENSG00000105655.17	0.00344365	0.417729
ENSG00000105656.11	-0.00876066	0.782174
ENSG00000105662.14	-0.0236214	0.273193
ENSG00000105664.9	0.0230259	1.36791e-05
ENSG00000105701.14	-0.00274047	0.1653
ENSG00000105708.8	0.140822	0.0371092
ENSG00000105856.12	-0.00791629	0.440085
ENSG00000105877.16	-0.0151135	0.68639
ENSG00000105996.6	-0.0631227	0.304958
ENSG00000106077.17	-0.00869889	0.00542237
ENSG00000106123.10	0.00155403	0.54096
ENSG00000106346.10	0.0106631	0.700688
ENSG00000106367.12	-0.00968852	0.164705
ENSG00000106484.13	-0.00225255	0.609561
ENSG00000106624.7	0.000344096	0.495774
ENSG00000106628.9	-0.00414958	0.279165
ENSG00000106948.15	0.00481681	0.155483
ENSG00000106991.12	0.000558139	0.815416
ENSG00000107159.11	0.00085943	0.805047
ENSG00000107201.8	0.00764375	0.474357
ENSG00000107404.16	-0.0149988	0.0968164
ENSG00000107581.11	0.00178476	0.480502
ENSG00000107672.13	0.0492964	0.188729
ENSG00000107736.18	0.0244527	0.0109868
ENSG00000107829.12	-0.0101047	0.206509
ENSG00000107859.8	-3.29162	0.250681
ENSG00000107872.11	-0.0203381	0.363617
ENSG00000107874.9	-0.0137456	0.128613
ENSG00000107902.12	-0.0437595	0.000419736
ENSG00000108262.14	0.00557566	0.225189
ENSG00000108309.11	0.0173835	0.11326
ENSG00000108556.7	-0.438713	0.136516
ENSG00000108591.8	-0.0842437	0.0026501
ENSG00000108592.15	0.00957845	0.231867
ENSG00000108602.16	-0.0702992	0.282685
ENSG00000108604.14	0.00533434	0.362017
ENSG00000108788.10	-0.00293259	0.831249
ENSG00000108797.10	0.0155971	0.401548
ENSG00000108799.11	-0.0248044	0.0313123
ENSG00000108840.14	-0.00160249	0.867325
ENSG00000108846.14	6.30209e-05	0.949154
ENSG00000108854.14	-0.000637896	0.964756
ENSG00000108924.12	-0.00760751	0.249639
ENSG00000108963.16	-0.0746645	0.00127414
ENSG00000109519.11	-0.00469751	0.744412
ENSG00000109686.15	-0.00112921	0.859873
ENSG00000109956.11	-0.000425112	0.969739
ENSG00000110042.6	-0.000459356	0.929155
ENSG00000110395.4	-0.0069686	0.666597
ENSG00000110697.11	-0.0196702	0.0285392
ENSG00000110700.5	0.00161414	0.148986
ENSG00000110711.8	-0.00057463	0.939087
ENSG00000110925.5	0.0241517	0.252834
ENSG00000111077.16	0.00283691	0.589052
ENSG00000111087.8	0.267726	0.00510655
ENSG00000111276.9	0.0158551	0.116253
ENSG00000111344.10	-0.0105943	0.258417
ENSG00000111445.12	0.0828145	0.00472527
ENSG00000111669.13	-0.000608958	0.361769
ENSG00000111671.8	0.0146778	0.0626373
ENSG00000112137.15	0.00818963	0.753055
ENSG00000112511.16	-0.0105241	0.304273
ENSG00000112514.14	0.00120008	0.637771
ENSG00000113716.11	0.00372999	0.761974
ENSG00000113758.12	-0.00351461	0.368053
ENSG00000113763.9	-0.0237987	0.429127
ENSG00000114354.11	0.00143063	0.797855
ENSG00000115053.14	0.00506305	0.00104545
ENSG00000115155.15	0.304051	0.00789933
ENSG00000115232.12	0.0573381	0.00471488
ENSG00000115275.10	0.0112215	0.388352
ENSG00000115310.16	0.000443563	0.717785
ENSG00000115325.12	0.000177708	0.991719
ENSG00000115657.11	0.0273757	0.307055
ENSG00000115841.18	-0.023016	0.776064
ENSG00000116005.10	-0.000356319	0.910724
ENSG00000116161.16	0.0294601	6.94114e-05
ENSG00000116176.6	-0.0134841	0.89126
ENSG00000116221.14	0.00151122	0.830616
ENSG00000116254.16	0.00878252	0.787929
ENSG00000116329.9	0.141221	0.596511
ENSG00000116478.10	0.0122699	0.02701
ENSG00000116957.11	0.0687575	0.00212995
ENSG00000117308.13	-0.00867412	0.17297
ENSG00000117411.15	-0.0220988	0.105462
ENSG00000117419.13	-0.00768466	0.525596
ENSG00000118094.10	-0.06769	0.0958489
ENSG00000118518.14	0.0050791	0.84185
ENSG00000118873.14	0.0330647	0.0199176
ENSG00000118997.12	-0.0243517	0.497894
ENSG00000119041.9	0.0366079	0.000901049
ENSG00000119396.9	-0.00885913	0.16198
ENSG00000119397.15	0.0748326	0.00159534
ENSG00000119408.15	-0.0111261	0.107878
ENSG00000119522.14	-0.0173619	0.323136
ENSG00000119689.13	-0.00845102	0.0287123
ENSG00000119698.10	0.383806	0.217424
ENSG00000119915.4	-0.171953	0.66393
ENSG00000119986.6	0.0187942	0.45286
ENSG00000120333.4	0.0384647	0.149669
ENSG00000120699.11	0.00384776	0.898816
ENSG00000120784.14	-0.00496218	0.948626
ENSG00000120860.9	-0.0211885	0.382475
ENSG00000120948.14	0.0298926	0.102337
ENSG00000121053.5	-0.289469	0.615955
ENSG00000121075.8	0.321172	0.00512236
ENSG00000121653.10	-0.041703	0.0586393
ENSG00000122033.13	0.00362464	0.802273
ENSG00000122034.11	0.000845916	0.845705
ENSG00000122203.13	-0.00192519	0.556422
ENSG00000122674.10	-0.0261316	0.556856
ENSG00000122696.11	-0.0291954	0.60644
ENSG00000122729.17	-0.00164856	0.676288
ENSG00000122735.14	-0.249638	0.00391879
ENSG00000122971.7	-0.00605863	0.232
ENSG00000123136.13	0.0238579	0.000325412
ENSG00000123143.11	0.00133739	0.459029
ENSG00000123146.18	0.0085265	0.00219663
ENSG00000123329.16	0.0141483	0.0318249
ENSG00000123342.14	-0.0178857	0.485273
ENSG00000123395.13	0.0115692	0.571808
ENSG00000123485.10	0.156782	1.99593e-10
ENSG00000123737.11	0.0877999	0.0110868
ENSG00000123870.10	-0.111617	0.516139
ENSG00000124151.17	0.000759182	0.916005
ENSG00000124541.6	0.00978949	0.0421615
ENSG00000124574.13	0.0203677	0.0108917
ENSG00000124587.12	0.00532733	0.498473
ENSG00000124593.13	0.0344556	0.10459
ENSG00000124713.5	0.174413	0.181089
ENSG00000124915.9	2.0553	0.082552
ENSG00000124939.5	0.0176005	0.803789
ENSG00000125037.11	-0.00416898	0.61033
ENSG00000125148.6	-0.000951375	0.591334
ENSG00000125149.10	-0.0590655	0.0962852
ENSG00000125170.9	-0.012381	0.00262232
ENSG00000125257.12	-0.00166311	0.538284
ENSG00000125355.14	-0.0157262	0.526717
ENSG00000125520.12	-0.00550642	0.0921032
ENSG00000125650.4	-0.32807	0.00658311
ENSG00000125652.6	-0.012517	0.151145
ENSG00000125741.4	-0.0340524	0.0582874
ENSG00000125753.12	0.00169688	0.746395
ENSG00000125775.13	-0.00115609	0.915983
ENSG00000126010.5	-0.0981713	0.891687
ENSG00000126246.8	0.00324743	0.949069
ENSG00000126247.9	-0.00576752	0.000294455
ENSG00000126464.12	0.0039996	0.754844
ENSG00000126500.3	-0.257107	0.554269
ENSG00000126603.7	-0.00901144	0.00970838
ENSG00000126778.8	0.0180151	0.393371
ENSG00000126895.12	-0.00147387	0.931111
ENSG00000127311.8	0.316861	0.000322496
ENSG00000127533.3	0.0127728	0.598584
ENSG00000127564.15	0.173035	1.95081e-05
ENSG00000127585.10	-0.00962961	0.0884218
ENSG00000127948.12	-0.0050264	0.110271
ENSG00000128016.5	-0.000116804	0.911704
ENSG00000128191.12	0.042395	0.0563913
ENSG00000128283.6	-0.00982745	0.0507982
ENSG00000128322.6	-0.136225	0.860049
ENSG00000128346.9	-0.335472	0.156087
ENSG00000128463.11	0.0128757	0.132257
ENSG00000128482.14	0.492183	0.000196092
ENSG00000128563.12	-0.00795319	0.391696
ENSG00000128564.6	-0.000483782	0.764637
ENSG00000128595.15	0.000150318	0.962224
ENSG00000128617.2	-0.277893	0.138174
ENSG00000128709.11	-0.0198538	0.370048
ENSG00000129103.16	-0.00343946	0.173387
ENSG00000129195.14	0.29936	4.63479e-05
ENSG00000129347.18	0.045697	0.0138738
ENSG00000129451.10	0.0927911	0.107121
ENSG00000129691.14	0.0208755	0.0182374
ENSG00000129910.6	-0.0986632	0.87083
ENSG00000129951.17	0.0140125	0.91235
ENSG00000129968.14	-0.018767	0.36238
ENSG00000130244.11	-0.0916931	0.0605512
ENSG00000130487.5	-0.0066413	0.591861
ENSG00000130511.14	-0.00142208	0.90293
ENSG00000130545.14	-0.0245088	0.212894
ENSG00000130584.9	-0.0758036	0.0223797
ENSG00000130702.12	-8.53413e-05	0.952002
ENSG00000130706.11	0.00386119	0.454929
ENSG00000130714.14	-0.0373639	0.0522044
ENSG00000130717.11	-0.0276556	0.0254713
ENSG00000130734.8	-0.0713884	0.00305835
ENSG00000130748.6	-0.00798127	0.853776
ENSG00000130751.8	0.0523428	0.55756
ENSG00000130758.6	-0.0438618	0.27749
ENSG00000130811.9	0.00216644	0.40094
ENSG00000130812.9	-0.129895	0.75818
ENSG00000130813.16	0.0120225	0.381776
ENSG00000130826.14	0.0198602	0.00680657
ENSG00000130827.6	-0.00538205	0.580344
ENSG00000130830.13	-0.012616	0.0988018
ENSG00000130876.10	0.313301	0.361113
ENSG00000130881.12	0.00567414	0.574522
ENSG00000131149.16	-0.0236377	0.010398
ENSG00000131153.7	0.0615356	0.119943
ENSG00000131188.10	0.00948358	0.856358
ENSG00000131236.15	0.00113172	0.613314
ENSG00000131238.15	0.00296328	0.379149
ENSG00000131389.15	-0.0017786	0.511844
ENSG00000131470.13	0.124695	0.215442
ENSG00000131584.17	-0.0155276	0.0690396
ENSG00000131650.12	0.220929	0.198913
ENSG00000131788.14	0.0120289	0.352346
ENSG00000131899.9	-0.0307674	0.0818526
ENSG00000132153.13	-0.021373	0.0191363
ENSG00000132155.10	-0.0135478	0.154922
ENSG00000132313.13	-0.024091	0.105201
ENSG00000132388.11	-0.010958	0.35767
ENSG00000132507.16	-0.00279233	0.0935043
ENSG00000132613.13	0.0268418	0.13627
ENSG00000132622.9	0.00823167	0.874594
ENSG00000132793.10	-0.0084344	0.294727
ENSG00000133019.10	0.0165899	0.863959
ENSG00000133055.7	-0.0623451	0.643748
ENSG00000133318.12	-0.00104652	0.78578
ENSG00000133794.16	-0.0268526	0.464679
ENSG00000133805.14	-0.0226224	0.36035
ENSG00000133961.18	-0.0105385	0.105278
ENSG00000134013.14	-4.05393e-05	0.992555
ENSG00000134317.16	0.00420332	0.515462
ENSG00000134318.12	0.0129189	0.156533
ENSG00000134398.11	0.270231	0.103538
ENSG00000134480.12	0.010424	0.69368
ENSG00000134668.11	0.00895904	0.00133536
ENSG00000134684.9	0.00438808	0.632026
ENSG00000134697.11	0.0564524	1.09996e-05
ENSG00000134769.20	-0.0642782	0.00184208
ENSG00000134780.8	-0.00673067	0.871729
ENSG00000135093.11	0.011917	0.726511
ENSG00000135144.6	-0.0046673	0.799252
ENSG00000135365.14	0.0238125	0.232539
ENSG00000135414.8	0.011241	0.689017
ENSG00000135451.11	0.167345	1.05562e-09
ENSG00000135597.17	0.0550899	0.0713123
ENSG00000135678.10	-0.000850876	0.638016
ENSG00000135749.17	0.025665	0.136823
ENSG00000135778.10	0.0103881	0.298442
ENSG00000135945.8	0.0509158	0.0185366
ENSG00000136048.12	0.00370391	0.217588
ENSG00000136059.13	-0.00903147	0.729312
ENSG00000136478.6	-0.00603687	0.458698
ENSG00000136854.16	-0.0384563	0.0774675
ENSG00000136877.13	-0.0135795	0.208598
ENSG00000136881.10	0.00772224	0.873838
ENSG00000136930.11	0.00332126	0.249682
ENSG00000137070.16	0.00239772	0.955783
ENSG00000137154.11	0.000172267	0.567723
ENSG00000137200.11	0.00326531	0.780115
ENSG00000137267.5	0.00633844	0.637565
ENSG00000137274.11	-0.0351322	0.0109216
ENSG00000137563.10	0.00564161	0.646785
ENSG00000137575.10	2.9891e-05	0.984238
ENSG00000137825.9	0.0731038	0.408993
ENSG00000137841.10	0.00843181	0.257244
ENSG00000137843.10	0.0202924	0.952663
ENSG00000137877.9	-0.0068764	0.670332
ENSG00000138061.10	0.00108428	0.383654
ENSG00000138073.12	0.0110846	0.272782
ENSG00000138100.12	0.0200544	0.324966
ENSG00000138193.13	0.0260221	0.125092
ENSG00000138794.8	0.0252564	0.496141
ENSG00000138834.11	-0.00277714	0.40858
ENSG00000139044.9	-0.00287573	0.811124
ENSG00000139540.10	-0.00282044	0.336064
ENSG00000139645.9	-0.0101278	0.101932
ENSG00000139835.12	-0.0181712	0.455243
ENSG00000140093.8	1.23515	0.00555896
ENSG00000140104.12	-0.0598131	0.00161227
ENSG00000140199.10	-0.0033782	0.780734
ENSG00000140854.11	-0.0721402	0.00324663
ENSG00000140859.14	-0.0114475	0.0164849
ENSG00000140876.10	-0.200484	0.0280946
ENSG00000140931.18	-7.03221e-05	0.9885
ENSG00000140939.13	-0.017507	0.0532615
ENSG00000140990.13	-0.000786069	0.779415
ENSG00000141068.12	-4.14556e-05	0.997488
ENSG00000141179.12	0.00528587	0.754399
ENSG00000141219.14	0.0402224	0.146683
ENSG00000141349.7	0.0017353	0.6152
ENSG00000141401.10	-0.00362469	0.0150386
ENSG00000141447.15	-0.0121661	0.164131
ENSG00000141503.14	-0.0139524	0.0104904
ENSG00000141522.10	-0.00372202	0.131922
ENSG00000141564.12	-0.0190973	0.121294
ENSG00000141744.3	-0.0102535	0.913947
ENSG00000141934.8	-0.00114176	0.80996
ENSG00000142186.15	-0.0133063	0.127257
ENSG00000142197.11	0.00296125	0.81321
ENSG00000142208.14	-0.019942	0.0285344
ENSG00000142632.15	0.0126155	0.438307
ENSG00000143125.5	2.29964	0.0277178
ENSG00000143157.10	0.00890991	0.00567388
ENSG00000143198.11	-0.000670197	0.80277
ENSG00000143318.11	0.0448181	0.00264532
ENSG00000143340.6	0.562272	0.181977
ENSG00000143382.12	0.00451971	0.788862
ENSG00000143442.20	0.00353472	0.454862
ENSG00000143494.14	0.213872	3.44992e-07
ENSG00000143552.8	-0.00407344	0.980817
ENSG00000143553.9	0.0409063	0.0601333
ENSG00000143621.15	0.00681302	0.0130618
ENSG00000143748.16	0.236437	2.92032e-10
ENSG00000143819.11	0.000343934	0.648048
ENSG00000143845.13	-0.00379061	0.608559
ENSG00000143862.6	0.00650351	0.542804
ENSG00000143952.18	0.0122038	0.595916
ENSG00000143977.12	0.0385458	0.00334577
ENSG00000143994.12	-0.278099	0.0457567
ENSG00000144045.12	0.179886	0.00280914
ENSG00000144395.16	0.035041	0.00495503
ENSG00000144596.10	-0.0606643	0.489485
ENSG00000144597.12	-0.0172892	0.410131
ENSG00000144746.6	-0.00188658	0.357739
ENSG00000144857.13	-0.00892153	0.674184
ENSG00000145002.11	-1.10239	0.344147
ENSG00000145244.10	-0.0608449	0.750177
ENSG00000145246.12	-0.0170632	0.109338
ENSG00000145386.8	0.187305	5.02991e-08
ENSG00000145416.12	0.00591256	0.652566
ENSG00000145715.13	-0.00933302	0.509438
ENSG00000145721.10	-0.0634136	0.0827684
ENSG00000145901.13	-0.00208156	0.369294
ENSG00000146223.13	0.00232012	0.197404
ENSG00000146426.16	0.194074	0.139564
ENSG00000146477.5	0.0076126	0.539671
ENSG00000146556.13	-0.0997576	0.111542
ENSG00000146830.9	-0.00387182	0.32028
ENSG00000147119.3	-0.0706662	0.278999
ENSG00000147465.10	0.626926	0.000328646
ENSG00000147571.4	-0.0247136	0.736665
ENSG00000147573.15	-0.0418643	0.157562
ENSG00000147912.11	-0.0710802	0.39357
ENSG00000148082.8	0.00949085	0.696095
ENSG00000148204.10	0.00443373	0.759043
ENSG00000148337.18	-0.00606898	0.48546
ENSG00000148358.18	-0.00376856	0.462584
ENSG00000148362.9	-0.00221879	0.802526
ENSG00000148600.13	-0.00683092	0.200185
ENSG00000148702.13	-0.000174743	0.879387
ENSG00000148824.17	0.0322639	0.510953
ENSG00000148925.9	0.0266742	0.408686
ENSG00000149179.12	-0.0317725	0.0521437
ENSG00000149182.13	-0.00675071	0.488857
ENSG00000149243.14	0.231982	0.00389273
ENSG00000149273.13	0.000648714	0.0308131
ENSG00000149328.13	-0.00682803	0.374289
ENSG00000149346.13	0.0177816	0.616756
ENSG00000149489.7	-0.0848411	0.414867
ENSG00000149541.8	-0.00455996	0.573636
ENSG00000149782.10	0.00865405	0.410659
ENSG00000149922.9	-0.125226	0.0888131
ENSG00000149923.12	0.00199866	0.698487
ENSG00000149929.14	-0.0399265	0.107247
ENSG00000149930.16	-0.0149752	0.132727
ENSG00000149968.10	-0.125919	0.66843
ENSG00000149970.13	0.953375	0.00331304
ENSG00000150281.6	-0.0373374	0.0418522
ENSG00000151117.7	0.00217341	0.873056
ENSG00000151303.11	0.212159	0.302295
ENSG00000151364.14	-0.0711619	0.171017
ENSG00000151365.2	-0.0506007	0.698193
ENSG00000151366.11	0.0061733	0.589971
ENSG00000152382.5	0.0637142	0.0505585
ENSG00000153162.8	-0.0083267	0.62477
ENSG00000153944.9	-0.00104723	0.692613
ENSG00000154040.19	0.00915736	0.949287
ENSG00000154146.11	0.0023046	0.947646
ENSG00000154175.15	-0.00152331	0.271969
ENSG00000154222.13	-0.00285214	0.788625
ENSG00000154639.17	-0.0026553	0.526023
ENSG00000154640.13	0.00228005	0.701393
ENSG00000154864.10	0.0662736	2.45122e-05
ENSG00000154945.6	0.0169202	0.163453
ENSG00000155026.15	-0.808084	0.569308
ENSG00000155252.13	-0.00758201	0.434737
ENSG00000155363.17	0.0154812	0.0205855
ENSG00000155366.15	0.000652852	0.654453
ENSG00000155506.15	0.00472416	0.064319
ENSG00000155749.11	-0.278361	0.413793
ENSG00000155850.7	-0.00557201	0.576196
ENSG00000155974.10	0.0187904	0.651177
ENSG00000156096.11	-1.14953	0.327959
ENSG00000156381.7	-0.0505179	0.0050358
ENSG00000156642.15	-0.00283892	0.579682
ENSG00000157017.14	-0.138923	0.630475
ENSG00000157020.16	-0.00326958	0.648692
ENSG00000157077.13	0.0131655	0.464904
ENSG00000157111.11	-0.0149984	0.132104
ENSG00000157216.14	0.00570025	0.708147
ENSG00000157368.9	0.0309352	0.221057
ENSG00000157593.15	0.00209516	0.0396652
ENSG00000157833.11	0.00847042	0.590047
ENSG00000157851.15	0.0212441	0.327345
ENSG00000157856.9	-0.0516078	0.505235
ENSG00000158008.8	0.280932	0.235627
ENSG00000158014.13	0.00772691	0.353549
ENSG00000158158.10	0.00319681	0.826139
ENSG00000158417.9	0.00458539	0.244836
ENSG00000158483.14	-0.0825457	0.27434
ENSG00000158526.7	0.0132199	0.170403
ENSG00000158552.11	-0.0207117	0.147266
ENSG00000158578.17	-0.0821959	0.339454
ENSG00000158623.13	-0.0194304	0.0762999
ENSG00000158792.14	-0.0523591	0.0317603
ENSG00000158828.5	-0.0325837	0.0118139
ENSG00000159023.17	0.00229859	0.725586
ENSG00000159184.7	0.0338107	0.0071987
ENSG00000159247.11	-0.0696329	0.439299
ENSG00000159263.14	0.011204	0.477983
ENSG00000159267.13	-0.00966996	0.632019
ENSG00000159374.16	-0.144823	0.368673
ENSG00000159377.9	0.00471986	0.0181088
ENSG00000159792.8	-0.0417978	0.000157494
ENSG00000159842.13	-0.0146586	0.000801795
ENSG00000160050.13	0.00730644	0.717701
ENSG00000160111.11	-0.00921558	0.734109
ENSG00000160172.9	-0.0771905	0.34616
ENSG00000160214.11	0.016399	0.00877896
ENSG00000160325.13	-0.0241769	0.0238088
ENSG00000160326.12	0.0397516	0.245067
ENSG00000160404.16	-0.0144592	0.705205
ENSG00000160469.15	-0.0621053	0.0443193
ENSG00000160781.14	0.0108043	0.697151
ENSG00000160818.15	0.0287202	0.101565
ENSG00000160883.9	0.00518062	0.847057
ENSG00000160951.3	0.278701	0.567163
ENSG00000161082.11	-0.121699	0.209681
ENSG00000161091.11	-0.0263723	5.7084e-05
ENSG00000161281.9	-0.00383389	0.641476
ENSG00000161395.11	-0.00370348	0.71954
ENSG00000161682.13	0.10741	0.00102434
ENSG00000161800.11	0.0522393	0.000577562
ENSG00000162006.8	-0.10676	0.684264
ENSG00000162066.13	0.00502833	0.422228
ENSG00000162078.10	0.156568	0.22838
ENSG00000162241.11	-0.00188954	0.955484
ENSG00000162434.10	-0.0010133	0.615934
ENSG00000162437.13	-0.0327783	0.20971
ENSG00000162522.9	-0.00902712	0.0521832
ENSG00000162572.18	-0.0424969	0.209143
ENSG00000162728.4	1.15341	0.553226
ENSG00000162729.12	-0.000149057	0.983494
ENSG00000162885.11	0.10814	0.0149142
ENSG00000162892.14	0.263224	0.000285734
ENSG00000162894.10	0.0376268	0.0273441
ENSG00000162976.11	-0.00031935	0.987945
ENSG00000163154.5	0.0294428	0.251333
ENSG00000163155.10	0.112617	0.0527385
ENSG00000163156.10	0.0307464	0.0140718
ENSG00000163159.10	0.0460172	0.00187288
ENSG00000163249.8	-0.00268604	0.887886
ENSG00000163251.3	0.00816706	0.511203
ENSG00000163380.14	-0.503397	0.74711
ENSG00000163382.10	0.00231352	0.513247
ENSG00000163485.14	0.00852308	0.219415
ENSG00000163697.15	-0.0185173	0.317444
ENSG00000163703.16	-0.0407991	0.00114207
ENSG00000163704.10	-0.0701707	0.22759
ENSG00000163794.6	-0.0391395	0.598117
ENSG00000163806.14	0.133941	0.685767
ENSG00000163879.10	-0.0195668	0.0383544
ENSG00000163938.15	0.0110761	0.107818
ENSG00000164054.14	-0.00229678	0.415462
ENSG00000164062.11	-0.00851309	0.00972107
ENSG00000164070.10	0.00194312	0.8498
ENSG00000164099.3	0.24267	0.00820405
ENSG00000164296.6	0.160661	0.0670726
ENSG00000164597.12	-0.00508824	0.746994
ENSG00000164649.18	-0.00590434	0.783796
ENSG00000164663.12	0.0311585	0.0536475
ENSG00000164674.14	-0.0352284	0.341543
ENSG00000164742.13	-0.016234	0.646711
ENSG00000164776.8	-0.282173	0.414324
ENSG00000164808.15	0.0340621	0.0334649
ENSG00000164855.14	0.018796	0.0439215
ENSG00000164889.11	-0.00332252	0.297302
ENSG00000164896.18	-0.00542908	0.149
ENSG00000164902.12	0.0287149	0.123003
ENSG00000164932.11	0.061662	2.47232e-05
ENSG00000165125.16	0.00574522	0.576275
ENSG00000165131.6	2.47526	0.182093
ENSG00000165458.12	-0.00610894	0.447465
ENSG00000165905.15	-0.00715226	0.567023
ENSG00000165983.13	-0.00778613	0.163877
ENSG00000165985.9	-0.0288423	0.60183
ENSG00000166004.13	0.042486	0.425811
ENSG00000166171.11	-0.0307216	0.0621927
ENSG00000166311.8	-0.00511575	0.24971
ENSG00000166313.17	-0.0312036	0.0109315
ENSG00000166428.11	0.0271991	0.0937356
ENSG00000166507.15	-0.275416	0.407113
ENSG00000166575.15	-0.0336993	0.151356
ENSG00000166763.7	0.546548	0.372184
ENSG00000166816.12	-0.0119683	0.0109916
ENSG00000166851.13	0.126362	1.17721e-07
ENSG00000166856.2	-0.528919	0.670234
ENSG00000166860.2	0.120549	0.0969994
ENSG00000166960.15	-0.130582	0.492955
ENSG00000166971.15	-0.0374065	0.0509281
ENSG00000167094.14	0.0124484	0.936857
ENSG00000167105.6	0.00322029	0.912877
ENSG00000167106.10	-0.00136737	0.669934
ENSG00000167118.9	-0.0165128	0.107359
ENSG00000167220.10	-0.0489052	0.0693814
ENSG00000167280.15	0.000849188	0.894863
ENSG00000167281.17	0.926112	0.387072
ENSG00000167311.12	0.0549678	0.0157285
ENSG00000167460.13	0.00319407	0.0081658
ENSG00000167468.15	-0.00159061	0.117462
ENSG00000167513.7	0.0952738	0.00378215
ENSG00000167535.6	-0.00327928	0.733387
ENSG00000167543.14	-0.00267878	0.567733
ENSG00000167549.17	-0.0021235	0.879932
ENSG00000167644.10	-0.0139013	0.0108536
ENSG00000167645.15	-0.0026636	0.866508
ENSG00000167670.14	0.0924138	0.00225869
ENSG00000167671.10	-0.0144453	0.00094853
ENSG00000167748.9	0.00370288	0.216733
ENSG00000167771.5	0.198188	0.0093729
ENSG00000167778.7	-0.0265856	0.000179727
ENSG00000167863.10	-0.000138814	0.941522
ENSG00000167889.11	0.23219	0.00011152
ENSG00000167930.14	-0.00636431	0.0602085
ENSG00000167967.14	-0.003588	0.852485
ENSG00000167968.11	0.246457	0.0627107
ENSG00000167969.11	-0.0043327	0.104864
ENSG00000167984.15	0.0546203	0.0357972
ENSG00000168056.13	-0.00103086	0.493741
ENSG00000168060.13	0.0221777	0.66178
ENSG00000168061.12	0.0375812	0.0579955
ENSG00000168234.11	-0.0601487	0.232971
ENSG00000168256.16	-0.00855312	0.40509
ENSG00000168268.9	0.000417596	0.963445
ENSG00000168350.7	-0.0102404	0.455158
ENSG00000168427.8	0.0856315	0.0355665
ENSG00000168477.16	0.0129558	0.435033
ENSG00000168743.11	-0.00273228	0.391075
ENSG00000168802.11	-0.00880084	0.0884441
ENSG00000168827.13	-0.00530926	0.455598
ENSG00000168913.6	-0.410353	0.332893
ENSG00000168995.12	-0.105988	0.21634
ENSG00000169188.4	0.0154171	0.234586
ENSG00000169258.6	0.0273525	0.342969
ENSG00000169372.11	-0.0386101	0.24545
ENSG00000169583.12	0.000720884	0.978111
ENSG00000169641.12	-0.0379883	0.0132479
ENSG00000169692.11	0.00235825	0.617679
ENSG00000169718.16	0.00169182	0.600599
ENSG00000169727.11	-0.00239259	0.541247
ENSG00000169764.13	-0.00562711	0.329636
ENSG00000169885.8	0.736684	0.34406
ENSG00000169962.4	0.565819	0.000214452
ENSG00000169972.10	-0.0262798	0.481593
ENSG00000169994.17	0.00362079	0.352574
ENSG00000170035.14	0.00849161	0.487432
ENSG00000170049.8	-0.104435	0.376314
ENSG00000170075.8	0.163092	0.674558
ENSG00000170085.16	0.0701798	0.123261
ENSG00000170142.10	0.00939586	0.543768
ENSG00000170271.9	-0.0182377	0.104353
ENSG00000170291.13	-0.04956	0.00804777
ENSG00000170382.10	-0.00183933	0.886681
ENSG00000170423.11	0.482135	0.148224
ENSG00000170473.15	0.0367278	0.0289233
ENSG00000170684.7	0.0584482	0.0666349
ENSG00000170776.18	0.00179025	0.730429
ENSG00000170779.10	0.182683	6.63673e-05
ENSG00000171103.9	0.0628583	0.222363
ENSG00000171262.10	0.014325	0.465438
ENSG00000171462.13	0.76835	1.32984e-05
ENSG00000171603.15	-0.0033809	0.056868
ENSG00000171608.14	0.00121565	0.913555
ENSG00000171777.14	0.00813054	0.92487
ENSG00000171817.15	-0.163051	0.1151
ENSG00000171840.10	0.0631849	0.399992
ENSG00000171889.3	0.0190874	0.922965
ENSG00000172059.9	0.00549116	0.684628
ENSG00000172247.3	0.134995	0.854121
ENSG00000172346.13	-0.0083762	0.372387
ENSG00000172354.8	-0.00420976	0.0789463
ENSG00000172367.14	-0.0328935	0.0571241
ENSG00000172460.13	-0.0308151	0.82061
ENSG00000172476.3	0.110185	0.613469
ENSG00000172500.11	-0.00644594	0.469159
ENSG00000172531.13	-0.00405017	0.310251
ENSG00000172543.6	0.0075856	0.0238269
ENSG00000172575.10	0.00588918	0.765846
ENSG00000172613.6	-0.0117293	0.455354
ENSG00000172640.3	-0.0295697	0.990407
ENSG00000172650.11	0.145158	0.820338
ENSG00000172725.12	-0.00727338	0.157564
ENSG00000172889.14	0.00827181	0.290134
ENSG00000172935.8	0.0958232	0.0565503
ENSG00000173011.11	-0.00308078	0.8678
ENSG00000173124.13	0.900308	0.00813364
ENSG00000173137.10	0.0502609	0.0796635
ENSG00000173145.10	0.0413236	0.162176
ENSG00000173338.11	0.483361	0.399294
ENSG00000173418.10	0.00230753	0.847262
ENSG00000173442.10	-0.00128178	0.846374
ENSG00000173482.15	0.00264957	0.467204
ENSG00000173846.11	-0.0487994	0.0395433
ENSG00000173947.12	-0.0224506	0.315779
ENSG00000174243.8	0.00509836	0.457308
ENSG00000174292.11	-0.0819884	0.00432415
ENSG00000174521.7	-1.1938	0.177457
ENSG00000174606.11	0.0947729	0.00104863
ENSG00000175130.6	0.00516625	0.123397
ENSG00000175206.9	0.143882	0.896275
ENSG00000175592.7	0.0265573	0.0940028
ENSG00000175602.3	0.0211633	0.10549
ENSG00000175634.13	-3.66764e-05	0.998607
ENSG00000176125.4	0.0632497	0.625777
ENSG00000176728.6	0.158958	0.00416886
ENSG00000176871.7	-0.00396763	0.498897
ENSG00000176884.13	0.636967	0.258845
ENSG00000177045.7	-0.0611725	0.309459
ENSG00000177191.2	-0.0597778	0.36425
ENSG00000177370.4	-0.0432706	0.015811
ENSG00000177485.6	0.0784428	0.000299746
ENSG00000177548.11	-0.0154865	0.222859
ENSG00000177628.14	0.00302977	0.554716
ENSG00000177731.14	-0.00889276	0.000193806
ENSG00000177791.11	-0.209374	0.408715
ENSG00000177839.6	0.0159206	0.807392
ENSG00000177954.10	0.001352	0.00219852
ENSG00000178028.12	-0.00612689	0.560894
ENSG00000178149.15	-0.0617593	0.000201869
ENSG00000178252.16	-0.0117842	0.00420187
ENSG00000178297.11	-0.0595447	0.859772
ENSG00000178342.4	-0.479693	0.690263
ENSG00000178460.16	0.0957167	0.705077
ENSG00000178814.14	-0.00677257	0.430913
ENSG00000178821.11	0.0300402	0.93154
ENSG00000178947.8	-0.011992	0.123988
ENSG00000179051.12	0.00264039	0.493685
ENSG00000179057.12	-0.437509	0.032264
ENSG00000179222.16	0.00449884	0.0413803
ENSG00000179262.8	0.00150171	0.833278
ENSG00000179270.6	0.489767	0.54115
ENSG00000179271.2	0.00236488	0.410048
ENSG00000179299.15	-0.04705	0.335918
ENSG00000179361.16	0.223169	0.0377035
ENSG00000179564.3	-1.31042	0.494278
ENSG00000179832.16	-0.0204364	0.0508779
ENSG00000179886.5	-0.0294269	0.330204
ENSG00000180061.8	0.0344592	0.671754
ENSG00000180098.8	0.00365498	0.934866
ENSG00000180279.5	0.944267	0.0940709
ENSG00000180385.7	0.158492	0.18161
ENSG00000180448.9	-0.00150044	0.815757
ENSG00000180900.15	0.00688945	0.216007
ENSG00000180929.5	-0.829772	0.226674
ENSG00000181856.13	-0.0906902	0.149553
ENSG00000181885.17	-0.00612961	0.00398516
ENSG00000182048.10	-0.079985	0.432394
ENSG00000182179.9	0.00594651	0.287194
ENSG00000182196.12	-0.0226403	0.761221
ENSG00000182199.9	0.00210947	0.525141
ENSG00000182484.13	0.00529475	0.00441305
ENSG00000182518.12	0.0523101	0.089527
ENSG00000182578.12	0.000492488	0.858701
ENSG00000182759.3	1.92139	0.0142464
ENSG00000182796.11	-0.0352689	0.152424
ENSG00000182866.15	0.0229982	0.00683874
ENSG00000183020.12	-0.00581789	0.379658
ENSG00000183060.14	0.0419115	0.532283
ENSG00000183066.13	0.164706	0.420977
ENSG00000183426.14	-0.0560515	0.410631
ENSG00000183723.11	-0.0199057	0.00886532
ENSG00000183773.14	0.0372356	0.0189151
ENSG00000183793.12	0.0455508	0.692611
ENSG00000183798.4	2.53037	0.000110025
ENSG00000183889.11	0.145526	0.6794
ENSG00000183963.17	0.022793	0.0162081
ENSG00000184058.11	0.0277029	0.100467
ENSG00000184209.14	-0.000658692	0.969841
ENSG00000184281.13	0.00458834	0.660085
ENSG00000184343.9	0.620356	2.21948e-05
ENSG00000184363.8	0.00251295	0.775116
ENSG00000184481.15	0.000505155	0.986456
ENSG00000184575.10	0.0153501	0.00999638
ENSG00000184697.6	-0.0367127	0.841033
ENSG00000184860.8	-0.0278258	0.536644
ENSG00000184908.16	-0.0352243	0.380533
ENSG00000184956.14	-0.103981	0.794631
ENSG00000184979.9	0.0590534	0.590399
ENSG00000184990.11	0.00840635	0.49648
ENSG00000185038.13	0.342494	1.93161e-05
ENSG00000185133.12	-0.138772	0.232653
ENSG00000185187.11	-0.0074558	0.349881
ENSG00000185324.20	-0.0082271	0.0184066
ENSG00000185340.14	-0.0608229	0.00707271
ENSG00000185507.18	0.0187076	0.123693
ENSG00000185519.8	-0.0877058	0.00649222
ENSG00000185567.6	-0.00169335	0.294378
ENSG00000185614.4	0.0783438	0.000294833
ENSG00000185615.14	0.0395148	0.0283002
ENSG00000185633.9	0.00101476	0.294062
ENSG00000185792.8	-0.281975	0.46747
ENSG00000185838.12	0.238426	0.00392989
ENSG00000185864.15	0.0871092	0.266827
ENSG00000185896.10	-0.000994902	0.376712
ENSG00000185915.5	0.889319	0.0235257
ENSG00000186153.15	-0.0650047	0.0288008
ENSG00000186187.10	-0.0148723	0.521244
ENSG00000186193.8	0.0908274	4.45277e-05
ENSG00000186364.10	0.119178	0.380098
ENSG00000186625.12	0.0227722	0.553891
ENSG00000186897.4	0.00294615	0.799
ENSG00000186951.15	-0.00136262	0.828216
ENSG00000187024.12	1.30257	0.50111
ENSG00000187091.12	-0.0143876	0.288695
ENSG00000187325.4	0.0409951	0.0212282
ENSG00000187479.5	0.00365296	0.663945
ENSG00000187583.9	-0.048617	0.110365
ENSG00000187595.13	0.0984405	0.323021
ENSG00000187634.9	-0.00527749	0.683444
ENSG00000187642.8	-0.0603227	0.150617
ENSG00000187682.1	-1.17584	0.313502
ENSG00000187838.15	-1.00993	0.0612448
ENSG00000187848.11	1.3356	4.32327e-05
ENSG00000187980.6	0.874508	0.0486246
ENSG00000188002.9	0.089349	0.180162
ENSG00000188056.10	-1.61617	0.347948
ENSG00000188070.9	-0.0379437	0.210274
ENSG00000188092.13	0.120227	0.146533
ENSG00000188163.7	-0.674274	0.451119
ENSG00000188186.9	0.000787361	0.798311
ENSG00000188229.5	-0.000389407	0.80449
ENSG00000188396.3	-0.708747	0.324611
ENSG00000188452.12	0.04393	0.00581537
ENSG00000188486.3	0.030377	5.53605e-05
ENSG00000188505.4	-0.00152735	0.782951
ENSG00000188613.6	0.113762	0.212933
ENSG00000188779.9	-0.120473	0.797537
ENSG00000188786.9	0.0156044	0.527081
ENSG00000188976.9	-0.00749752	0.481703
ENSG00000189046.9	0.0470417	0.0411845
ENSG00000189077.9	-0.0125365	0.0589201
ENSG00000189269.11	-0.268809	0.185366
ENSG00000189350.11	0.272736	0.0386391
ENSG00000189409.11	3.01452	0.0401062
ENSG00000196110.6	0.129273	0.423602
ENSG00000196123.11	-0.0148857	0.106244
ENSG00000196169.13	1.04225	0.0129575
ENSG00000196187.10	0.00211227	0.560751
ENSG00000196296.12	-0.0409541	0.550749
ENSG00000196305.16	0.000455009	0.92439
ENSG00000196396.8	-0.00772436	0.0909732
ENSG00000196405.11	0.00556131	0.256312
ENSG00000196436.8	0.0267608	0.254443
ENSG00000196455.6	0.0165902	0.278602
ENSG00000196497.14	0.0182514	0.711258
ENSG00000196511.12	-0.00992925	0.0711481
ENSG00000196517.10	-0.0312433	0.624661
ENSG00000196557.9	0.00352865	0.628455
ENSG00000196562.13	-0.00237918	0.122042
ENSG00000196588.13	0.00964248	0.498699
ENSG00000196666.4	1.55835	0.332328
ENSG00000196696.11	-0.0384332	0.424072
ENSG00000196700.6	-0.0208333	0.167983
ENSG00000196878.11	0.000639126	0.514829
ENSG00000196950.12	0.019692	0.232487
ENSG00000196976.6	0.0353293	0.139209
ENSG00000196979.1	-0.445733	0.455415
ENSG00000197226.11	-0.00501762	0.239753
ENSG00000197586.11	-0.00108593	0.839443
ENSG00000197614.9	0.0428181	0.00960985
ENSG00000197629.5	-0.00052909	0.934894
ENSG00000197746.12	-8.39096e-05	0.540199
ENSG00000197753.8	0.601655	0.374435
ENSG00000197785.12	-0.0489578	0.0315598
ENSG00000197885.9	-0.0807557	0.15017
ENSG00000197893.12	-0.0051316	0.930488
ENSG00000197956.8	6.51695e-05	0.781983
ENSG00000197982.13	0.00575667	0.618295
ENSG00000197989.12	0.0242423	0.170411
ENSG00000197993.6	0.0426063	0.0410021
ENSG00000198026.7	0.0458234	0.00137488
ENSG00000198089.13	-0.018144	0.188439
ENSG00000198208.10	0.0234949	0.642685
ENSG00000198231.11	0.0229566	6.35194e-05
ENSG00000198252.10	0.0869102	0.0750379
ENSG00000198467.12	0.00309176	0.122021
ENSG00000198517.8	-0.0165747	0.206501
ENSG00000198643.5	0.0598249	0.000928986
ENSG00000198646.12	0.0037275	0.65823
ENSG00000198720.11	0.0211445	0.251384
ENSG00000198832.9	0.00548613	0.154192
ENSG00000198853.10	-0.0168336	0.123767
ENSG00000198931.9	-0.000311829	0.912494
ENSG00000198937.8	0.0374964	0.054158
ENSG00000198944.5	-0.036559	0.527897
ENSG00000198951.10	-0.0167043	0.153461
ENSG00000201440.1	-3.11896	0.141953
ENSG00000202343.1	-0.520605	0.536774
ENSG00000202533.1	2.43928	0.172905
ENSG00000203667.8	0.0208525	0.62351
ENSG00000203734.10	-2.30837	0.149311
ENSG00000203772.7	0.039528	0.505026
ENSG00000203804.4	0.795467	0.0966706
ENSG00000204033.8	-0.288142	0.428058
ENSG00000204084.11	0.00838435	0.856122
ENSG00000204165.5	0.647549	0.041645
ENSG00000204172.10	-0.035531	0.357491
ENSG00000204290.9	2.69219	0.197544
ENSG00000204396.9	-0.0232236	0.265246
ENSG00000204420.7	0.654909	0.431962
ENSG00000204475.8	0.34861	0.0361917
ENSG00000204482.9	0.0114879	0.253265
ENSG00000204560.8	0.0161449	0.423572
ENSG00000204564.10	-0.0575423	0.00976443
ENSG00000204618.7	-0.0137049	0.904511
ENSG00000204619.6	-0.014277	0.177039
ENSG00000204644.8	0.0816503	0.585769
ENSG00000204710.2	-0.667461	0.711749
ENSG00000204791.7	0.327449	0.719568
ENSG00000205090.7	0.144748	0.605428
ENSG00000205643.9	-0.0658555	0.171374
ENSG00000205702.9	-0.337234	0.153832
ENSG00000205744.8	-0.011323	0.263623
ENSG00000206384.9	1.28526	0.0382334
ENSG00000206530.7	0.00133202	0.930279
ENSG00000206561.11	-0.0856151	0.305984
ENSG00000206567.8	-0.0524532	0.670514
ENSG00000207721.1	1.06973	0.365432
ENSG00000207864.2	0.510003	0.658171
ENSG00000210195.2	0.251395	0.235387
ENSG00000210196.2	-0.00293434	0.0982107
ENSG00000211445.10	-0.000152196	0.346822
ENSG00000211450.8	0.00636607	0.182045
ENSG00000211584.12	-0.00973368	0.128322
ENSG00000213071.9	-0.0166994	0.947446
ENSG00000213373.6	-0.0018977	0.887367
ENSG00000213590.2	-1.06144	0.40063
ENSG00000213694.3	0.0398857	0.00957399
ENSG00000213722.7	-0.0115569	0.0161303
ENSG00000213937.3	0.151052	0.00138544
ENSG00000214595.10	0.0788179	0.206937
ENSG00000214655.9	-0.00886517	0.460412
ENSG00000214706.9	-0.0428996	0.00209702
ENSG00000214733.7	-0.0588711	0.922259
ENSG00000214765.7	-0.0206888	0.734534
ENSG00000214860.4	-0.203371	0.527603
ENSG00000214867.3	0.0014674	0.999469
ENSG00000215187.8	-0.422133	0.230061
ENSG00000215458.7	0.0523263	0.00848002
ENSG00000215859.7	-0.12764	0.695043
ENSG00000215914.4	-1.03272	0.361347
ENSG00000217442.3	-0.00371118	0.971819
ENSG00000218537.1	0.181117	0.422252
ENSG00000219433.2	-2.17422	0.614706
ENSG00000220848.4	-0.0938512	0.599792
ENSG00000221507.1	-1.09592	0.454844
ENSG00000221539.1	0.311094	0.259556
ENSG00000221821.3	-0.0894801	0.128113
ENSG00000221869.4	0.00495369	0.0543824
ENSG00000222448.1	-1.08655	0.673328
ENSG00000223403.3	0.519244	0.681263
ENSG00000223572.8	-0.032569	0.4598
ENSG00000223705.8	-0.0194084	0.119716
ENSG00000223764.2	-0.0226277	0.326162
ENSG00000223802.6	0.0026638	0.966813
ENSG00000224016.2	-0.822171	0.406487
ENSG00000224066.1	0.208753	0.707191
ENSG00000224712.9	0.15628	0.481252
ENSG00000224961.1	4.4499	0.00403576
ENSG00000224976.2	0.377569	0.817642
ENSG00000225031.1	0.161071	0.18487
ENSG00000225419.1	-7.90295	0.0834476
ENSG00000225526.4	0.125234	0.298468
ENSG00000225531.1	-2.99767	0.382185
ENSG00000225840.2	-0.0313331	0.687364
ENSG00000225872.2	0.329761	0.579181
ENSG00000225889.6	-0.0861685	0.357191
ENSG00000225969.1	-0.0303212	0.558905
ENSG00000226032.1	-0.112518	0.942475
ENSG00000226054.2	0.23165	0.727112
ENSG00000226055.2	-0.0501491	0.979848
ENSG00000226686.6	-0.24455	0.205266
ENSG00000226950.5	-0.00389709	0.785281
ENSG00000227039.5	0.0192748	0.482086
ENSG00000227066.1	0.0164491	0.174936
ENSG00000227070.1	3.60693	0.0642317
ENSG00000227218.6	-0.163549	0.516908
ENSG00000227473.1	-0.0279225	0.968134
ENSG00000227620.4	0.790719	0.494761
ENSG00000227632.2	0.408536	0.687098
ENSG00000227741.1	0.474168	0.563842
ENSG00000227802.1	4.32848	6.00747e-08
ENSG00000228071.4	1.24088	0.263246
ENSG00000228133.2	5.30779	0.155641
ENSG00000228278.3	-0.397174	0.706784
ENSG00000228347.1	-2.75959	0.444617
ENSG00000228474.4	0.00625096	0.117636
ENSG00000228727.7	-0.0915606	0.471361
ENSG00000228888.1	-0.432706	0.371319
ENSG00000228962.1	-0.446144	0.506034
ENSG00000229122.1	-1.15905	0.086934
ENSG00000229939.1	0.107735	0.855422
ENSG00000229960.1	1.71758	0.0484782
ENSG00000229980.4	0.104113	0.607319
ENSG00000230262.5	-0.1261	0.898899
ENSG00000230303.4	5.1939	0.191452
ENSG00000230646.1	-1.09685	0.753415
ENSG00000230756.1	-1.24333	0.755325
ENSG00000230805.5	-1.9069	0.549852
ENSG00000230929.5	7.55917	0.0568556
ENSG00000231177.4	-0.724601	0.193959
ENSG00000231672.5	0.130159	0.558812
ENSG00000231720.1	-0.67052	0.226754
ENSG00000231760.4	0.805644	0.324633
ENSG00000231852.5	-0.0164833	0.797662
ENSG00000231979.1	0.736005	0.535293
ENSG00000232218.1	2.0748	0.516166
ENSG00000232271.1	-0.757495	0.227595
ENSG00000232677.5	-0.01103	0.557003
ENSG00000232742.3	0.814217	0.616357
ENSG00000233024.6	0.240176	0.926094
ENSG00000233101.9	-0.0369761	0.513965
ENSG00000233330.1	0.189817	0.749267
ENSG00000233337.1	0.701191	0.0899847
ENSG00000233381.3	-3.05934	0.448058
ENSG00000233427.1	-4.00588	0.214871
ENSG00000233436.6	-0.494668	0.867987
ENSG00000233622.1	-0.254006	0.0776863
ENSG00000233750.3	-2.59822	0.38555
ENSG00000233783.6	-5.09471	0.208368
ENSG00000233884.1	-4.03511	0.230563
ENSG00000233885.6	0.272063	0.404694
ENSG00000234020.1	-2.48098	0.258078
ENSG00000234026.1	-0.408011	0.786036
ENSG00000234139.2	2.15163	0.468451
ENSG00000234160.1	-0.962172	0.0358581
ENSG00000234290.2	0.235869	0.146037
ENSG00000234345.2	4.62859	0.0516209
ENSG00000234354.3	-0.48882	0.656371
ENSG00000234405.1	0.554608	0.663767
ENSG00000234409.6	0.257647	0.00497886
ENSG00000234424.2	-3.05416	0.329111
ENSG00000234575.1	-1.34628	0.557392
ENSG00000234769.7	-0.226836	0.558576
ENSG00000234776.3	-1.61647	0.317502
ENSG00000234848.1	-2.16112	0.125725
ENSG00000235079.1	-1.23503	0.647638
ENSG00000235173.5	0.0151792	0.255295
ENSG00000235194.7	0.0106511	0.66528
ENSG00000235663.1	-1.79151	0.0405447
ENSG00000235821.1	0.453213	0.453828
ENSG00000235961.5	-0.0135018	0.334183
ENSG00000236194.3	8.56688	3.34612e-05
ENSG00000236397.3	0.0390646	0.794696
ENSG00000236675.1	0.0594398	0.531254
ENSG00000236830.5	-0.0222022	0.787803
ENSG00000237101.1	0.624618	0.0188788
ENSG00000237172.3	-0.00133261	0.935364
ENSG00000237190.3	0.0253908	0.256794
ENSG00000237214.3	0.0962061	0.675515
ENSG00000237264.4	0.110863	0.736505
ENSG00000237517.7	-0.0114106	0.344092
ENSG00000237807.3	0.0918989	0.465249
ENSG00000238151.1	-2.21231	0.126127
ENSG00000238171.1	0.655943	0.390023
ENSG00000238178.5	0.320863	0.641139
ENSG00000238271.2	-0.0123124	0.960959
ENSG00000238279.1	0.0762122	0.257136
ENSG00000239264.7	0.0404719	0.417174
ENSG00000239480.1	-1.06131	0.697527
ENSG00000239486.1	-0.108567	0.88056
ENSG00000239779.5	-0.0582401	0.0947194
ENSG00000239969.4	0.162324	0.590944
ENSG00000240288.6	0.010897	0.980543
ENSG00000240338.4	-7.54212	0.00630218
ENSG00000240674.1	6.56259	0.0361745
ENSG00000240710.1	2.87005	0.0767506
ENSG00000240972.1	0.000557104	0.917754
ENSG00000241527.1	0.625994	0.79521
ENSG00000241878.8	-0.0124609	0.254175
ENSG00000242252.1	-0.107432	0.590118
ENSG00000242852.5	-0.70884	0.165721
ENSG00000242952.1	-0.836904	0.754395
ENSG00000243708.7	0.434171	0.347023
ENSG00000243716.9	0.0610724	0.123268
ENSG00000243960.1	1.09933	0.329098
ENSG00000244038.8	0.00177728	0.590261
ENSG00000244165.1	0.00835775	0.833722
ENSG00000244383.1	-0.146672	0.519634
ENSG00000244607.4	-0.240775	0.00954322
ENSG00000244953.1	0.130826	0.860423
ENSG00000245317.2	-0.321408	0.154888
ENSG00000245910.7	0.0111216	0.00622352
ENSG00000246548.3	-2.86597	0.343499
ENSG00000246596.5	0.335764	0.220084
ENSG00000247679.2	0.0472507	0.797363
ENSG00000247728.2	1.21983	0.540847
ENSG00000248126.1	-0.543667	0.686099
ENSG00000248309.4	0.986891	0.292576
ENSG00000248375.1	-0.882662	0.751344
ENSG00000248559.1	-2.55518	0.233681
ENSG00000248705.1	5.84084	2.48639e-05
ENSG00000248712.6	0.0371679	0.597459
ENSG00000249035.5	-1.50613	0.680548
ENSG00000249258.2	0.0241814	0.993906
ENSG00000249635.1	0.454778	0.637771
ENSG00000249751.3	0.0693709	0.409301
ENSG00000250107.1	2.28917	0.191296
ENSG00000250794.2	0.271479	0.805862
ENSG00000250906.1	-2.31563	0.550986
ENSG00000250979.1	0.218452	0.773208
ENSG00000251179.1	0.126839	0.710473
ENSG00000251271.3	2.78963	0.00173423
ENSG00000251402.3	-0.567905	0.781869
ENSG00000251599.1	-0.0931341	0.581709
ENSG00000251603.1	-0.438884	0.494778
ENSG00000251669.4	-0.0430149	0.646699
ENSG00000252202.1	1.19464	0.18915
ENSG00000252335.1	-0.995373	0.657251
ENSG00000253304.1	-0.0750984	0.0139114
ENSG00000253317.1	0.115131	0.887758
ENSG00000253641.4	0.615814	0.281554
ENSG00000253649.2	0.627512	0.188087
ENSG00000253755.1	0.00983625	0.00275793
ENSG00000254338.1	1.41107	0.211407
ENSG00000254429.1	2.49206	0.0977446
ENSG00000254521.5	0.235479	0.127228
ENSG00000254777.4	5.30466	0.0559472
ENSG00000254802.1	1.88622	0.00075758
ENSG00000254978.2	-0.941416	0.421042
ENSG00000255200.1	-0.475117	0.0438113
ENSG00000255282.5	0.487772	0.0854514
ENSG00000255366.1	0.343137	0.16521
ENSG00000255429.1	-1.65748	0.485908
ENSG00000255478.1	5.19781	0.0300058
ENSG00000255769.6	-0.00993917	0.914509
ENSG00000255823.2	-0.324195	0.129155
ENSG00000255864.4	-3.44852	0.489787
ENSG00000255867.1	0.875829	0.576698
ENSG00000255967.1	1.19439	0.598042
ENSG00000256028.2	0.0861252	0.811106
ENSG00000256210.3	1.33098	0.161345
ENSG00000256269.5	-0.0335517	0.182577
ENSG00000256943.1	0.0450075	0.884151
ENSG00000257283.1	-2.4692	0.351533
ENSG00000257337.5	0.0283501	0.475373
ENSG00000257390.4	5.26659	0.0022708
ENSG00000257475.2	-9.95864	0.068361
ENSG00000257727.4	0.0229324	0.0389648
ENSG00000257740.1	-0.0748529	0.905831
ENSG00000257989.1	0.00621476	0.96509
ENSG00000258130.6	-0.930825	0.0689407
ENSG00000258301.3	-1.12616	0.0229153
ENSG00000258315.4	-0.125996	0.719018
ENSG00000258405.8	-0.375645	0.540109
ENSG00000258427.3	1.67131	0.16443
ENSG00000258539.1	-1.2485	0.455625
ENSG00000258626.2	-2.0085	0.406242
ENSG00000258727.1	0.0166082	0.85001
ENSG00000258819.1	0.20559	0.694188
ENSG00000258890.5	0.00167791	0.854844
ENSG00000259040.4	-0.229962	0.253645
ENSG00000259399.1	-0.303537	0.939488
ENSG00000259522.2	6.6261	0.0244424
ENSG00000259605.3	-0.303998	0.04017
ENSG00000259647.1	1.94133	0.29993
ENSG00000259648.1	-1.58661	0.574318
ENSG00000259780.3	-0.287013	0.866342
ENSG00000259803.5	0.345774	0.79835
ENSG00000259807.1	6.43776	4.28863e-06
ENSG00000259895.1	7.32337	0.00410624
ENSG00000259933.5	-0.055052	0.895931
ENSG00000259970.1	-6.89199	0.117485
ENSG00000260001.5	-0.815162	0.0379759
ENSG00000260027.4	-0.00524038	0.65472
ENSG00000260105.5	0.21459	0.774584
ENSG00000260190.1	-0.177834	0.946523
ENSG00000260201.2	-0.0284069	0.933145
ENSG00000260238.4	0.0649135	0.823688
ENSG00000260500.1	-3.85009	0.0135795
ENSG00000260517.2	1.01772	0.0184512
ENSG00000260645.1	-0.307124	0.334017
ENSG00000260762.1	-0.23672	0.529117
ENSG00000260779.1	1.91316	0.139252
ENSG00000261052.4	-0.154872	0.93552
ENSG00000261123.1	-0.256075	0.624061
ENSG00000261295.1	0.906358	0.0414546
ENSG00000261456.4	1.74918	0.0032814
ENSG00000261548.1	-3.32511	0.445255
ENSG00000261659.2	-0.684916	0.0274142
ENSG00000261668.1	-0.970141	0.276513
ENSG00000261707.1	-1.33816	0.0778488
ENSG00000261884.2	0.051646	0.39758
ENSG00000261924.1	1.47451	0.110956
ENSG00000262006.1	1.5981	0.0386581
ENSG00000262052.1	0.138084	0.949432
ENSG00000262877.4	-0.0108425	0.7507
ENSG00000262943.6	0.0553639	0.348464
ENSG00000263011.1	-0.536342	0.235048
ENSG00000263050.1	-0.891694	0.0164872
ENSG00000263214.1	-0.810151	0.0418735
ENSG00000263316.1	-0.0322673	0.947594
ENSG00000263370.1	0.985846	0.669849
ENSG00000263429.3	0.858838	0.0446118
ENSG00000263946.1	-0.580657	0.395132
ENSG00000263970.1	-1.0448	0.593706
ENSG00000264635.1	-1.25621	0.434453
ENSG00000264785.1	0.396826	0.812679
ENSG00000265912.1	1.51106	0.124799
ENSG00000266171.1	-1.53984	0.354057
ENSG00000266289.1	1.43508	0.487151
ENSG00000266402.3	0.290142	0.0130134
ENSG00000266733.4	-0.414991	0.791002
ENSG00000266957.1	-2.50284	0.51423
ENSG00000266973.1	-1.60064	0.447211
ENSG00000267053.5	-0.683374	0.19493
ENSG00000267074.1	0.434944	0.0363467
ENSG00000267363.1	0.426512	0.871588
ENSG00000267369.1	0.104782	0.024659
ENSG00000267383.5	0.363089	0.00357871
ENSG00000267405.1	2.81978	0.362681
ENSG00000267466.1	0.158818	0.262505
ENSG00000267480.1	-0.143187	0.00775001
ENSG00000267484.1	-2.00462	0.344352
ENSG00000267505.1	2.01918	0.349192
ENSG00000267506.4	0.178626	0.162637
ENSG00000267510.1	-0.687304	0.287335
ENSG00000267605.4	-0.891773	0.286035
ENSG00000267724.1	-1.0284	0.295855
ENSG00000267748.4	-0.258987	0.461886
ENSG00000268104.2	0.494512	0.000845702
ENSG00000268288.1	2.60033	0.377578
ENSG00000268575.1	-0.133422	0.441042
ENSG00000268883.2	-0.124933	0.555116
ENSG00000268903.1	-1.9253e-05	0.999803
ENSG00000268938.2	0.327787	0.729085
ENSG00000268970.1	-0.415812	0.183516
ENSG00000269072.1	1.19455	0.445455
ENSG00000269349.1	3.02427	0.296923
ENSG00000269514.1	0.0764231	0.85775
ENSG00000269656.1	-1.28465	0.613194
ENSG00000269858.4	-0.00593897	0.775656
ENSG00000269893.5	0.00591907	0.54187
ENSG00000269930.1	-3.6845	0.0451701
ENSG00000269982.1	-0.684655	0.0170368
ENSG00000270074.1	0.705126	0.239978
ENSG00000270402.1	1.95899	0.634843
ENSG00000270433.1	0.861158	0.741974
ENSG00000270510.1	0.578891	0.79791
ENSG00000270765.4	-0.454735	0.132439
ENSG00000270882.2	1.49097	0.24414
ENSG00000270885.1	0.112914	0.000349976
ENSG00000270947.1	1.85433	0.277974
ENSG00000271553.1	-0.158701	0.350065
ENSG00000271787.1	-0.308859	0.0577306
ENSG00000271913.4	-0.892409	0.0233983
ENSG00000272006.1	2.3733	0.010399
ENSG00000272034.1	0.350508	0.343033
ENSG00000272087.1	-0.186854	0.373194
ENSG00000272112.1	0.108247	0.699198
ENSG00000272121.1	-0.215579	0.359741
ENSG00000272148.1	-1.37421	0.211617
ENSG00000272223.1	-0.0457057	0.914916
ENSG00000272333.4	0.00648023	0.531129
ENSG00000272379.1	0.885782	0.694152
ENSG00000272391.4	-0.0158466	0.234035
ENSG00000272438.1	0.567534	0.520376
ENSG00000272645.2	-0.021906	0.457474
ENSG00000272689.1	3.64329	0.236193
ENSG00000272724.1	-0.577852	0.623723
ENSG00000272791.1	-0.426377	0.138016
ENSG00000272821.1	-0.0435279	0.373912
ENSG00000272829.1	-0.401759	0.479501
ENSG00000273011.1	-7.72136	0.139665
ENSG00000273027.1	-0.504391	0.311604
ENSG00000273073.1	1.10015	0.544442
ENSG00000273226.1	-0.410878	0.0485629
ENSG00000273265.1	-0.560628	0.0383198
ENSG00000273311.1	-0.257369	0.275082
ENSG00000273350.1	1.61979	0.451046
ENSG00000274363.1	-0.558191	0.21722
ENSG00000274659.1	3.519	0.299433
ENSG00000274736.3	-0.134737	0.866901
ENSG00000275793.1	1.50745	0.260081
ENSG00000276742.1	-0.162174	0.891727
ENSG00000276772.1	0.0913024	0.844293
ENSG00000277358.1	0.188276	0.934184
ENSG00000277877.3	0.707856	0.0582073
ENSG00000277895.1	1.73754	0.218297
ENSG00000278075.1	-3.72201	0.0603442
ENSG00000278603.1	-0.874076	0.240928
ENSG00000278655.1	-1.64749	0.409732
ENSG00000278690.1	4.42847	0.0183768
ENSG00000278932.2	0.440772	0.514279
ENSG00000278978.1	-0.328152	0.00380813
ENSG00000279117.1	0.0206074	0.552581
ENSG00000279208.1	1.32362	0.497873
ENSG00000279322.1	-0.201845	0.9699
ENSG00000279332.1	-0.180981	0.574342
ENSG00000279375.1	0.545158	0.417665
ENSG00000279464.1	-1.0026	0.0471776
ENSG00000279484.1	-0.18362	0.722934
ENSG00000279774.1	-0.0926865	0.730547
ENSG00000279792.1	-2.11207	0.013847
ENSG00000279802.1	1.24106	0.652421
ENSG00000280169.1	0.738997	0.192699
ENSG00000280212.1	-0.907877	0.394902
ENSG00000280213.1	-0.113236	0.69084
ENSG00000280311.1	-2.85561	0.49415
ENSG00000280328.1	-0.158703	0.327671
ENSG00000280560.1	-0.361741	0.789572
ENSG00000281538.1	-1.05695	0.090646
ENSG00000281691.1	-0.515277	0.705672

## Sheet: CG.DFI.LIHC
Gene	Coefficient	Logrank p-value
ENSG00000002330.12	0.000877708	0.842018
ENSG00000004487.14	0.0122982	0.00516731
ENSG00000004534.13	0.00699086	0.253951
ENSG00000004777.17	0.0456231	0.00212105
ENSG00000004864.12	-0.00296384	0.0554183
ENSG00000004975.10	0.0116336	0.239668
ENSG00000005007.11	-0.00292343	0.267794
ENSG00000005059.14	0.0071478	0.737697
ENSG00000006007.10	0.00865615	0.167705
ENSG00000006047.11	0.00130367	0.81953
ENSG00000006282.18	-0.00492092	0.107852
ENSG00000006283.16	0.269862	0.16437
ENSG00000008056.11	0.0107875	0.728543
ENSG00000008083.12	0.00757187	0.594176
ENSG00000008118.8	0.00255204	0.639173
ENSG00000008256.14	-0.00569196	0.726512
ENSG00000008323.14	-0.00555251	0.589248
ENSG00000008441.15	-0.000513561	0.798497
ENSG00000009724.15	-0.00105019	0.069438
ENSG00000010327.9	-0.000375484	0.862841
ENSG00000011009.9	0.00214586	0.42317
ENSG00000011143.15	0.074332	0.00847011
ENSG00000011304.15	0.00245873	0.238921
ENSG00000012211.11	0.0236109	0.637449
ENSG00000013306.14	0.00208167	0.0273651
ENSG00000015532.8	0.00880762	0.236508
ENSG00000016402.11	0.0438086	0.0368663
ENSG00000016864.15	-0.000731412	0.811464
ENSG00000019102.10	0.00117504	0.922969
ENSG00000019144.15	0.00083745	0.900057
ENSG00000025708.11	0.000525577	0.541057
ENSG00000029639.9	0.0124855	0.476153
ENSG00000030582.15	0.000788965	0.119995
ENSG00000033100.13	0.00492319	0.32758
ENSG00000035681.6	-0.00499085	0.746194
ENSG00000035720.6	-0.44814	0.206807
ENSG00000037042.8	0.0582731	0.00120167
ENSG00000042062.10	-0.0798184	0.0664635
ENSG00000047579.18	0.000146109	0.992197
ENSG00000047849.20	0.00404371	0.0183976
ENSG00000048462.9	-0.144711	0.213871
ENSG00000050426.14	0.0108916	0.0664702
ENSG00000050820.15	0.00254424	0.42648
ENSG00000052344.14	0.000866457	0.704063
ENSG00000054983.15	0.00900977	0.382545
ENSG00000055211.11	0.00608419	0.448322
ENSG00000059691.10	-0.00433146	0.577469
ENSG00000059915.15	-0.102966	0.0670188
ENSG00000061273.16	0.001728	0.747397
ENSG00000062096.13	-0.0127477	0.451793
ENSG00000062282.13	-0.00105206	0.148465
ENSG00000062524.14	-0.179355	0.0101616
ENSG00000064012.20	0.0145322	0.204247
ENSG00000064309.13	0.0093094	0.68168
ENSG00000064601.15	0.000688857	0.165531
ENSG00000064932.14	-0.000412204	0.941304
ENSG00000065320.7	-0.0143109	0.0664735
ENSG00000065923.8	0.000121737	0.988881
ENSG00000067182.6	-0.000450107	0.784805
ENSG00000067704.9	-0.00203492	0.174776
ENSG00000067829.17	-5.53173e-05	0.985142
ENSG00000068137.13	0.00845508	0.253472
ENSG00000068305.16	-0.00335433	0.662062
ENSG00000068383.17	-0.0205626	0.150729
ENSG00000068615.15	0.00483921	0.848947
ENSG00000069424.13	-0.00290903	0.284645
ENSG00000070047.10	0.0132995	0.0465626
ENSG00000070985.12	0.024492	0.827596
ENSG00000071282.10	-0.00889448	0.223386
ENSG00000072163.17	-0.0117656	0.00758521
ENSG00000072518.19	0.00994699	0.256684
ENSG00000072736.17	0.00551319	0.634945
ENSG00000072778.18	-0.000645468	0.0625268
ENSG00000074276.9	0.000276618	0.848821
ENSG00000075975.14	0.0195495	0.134653
ENSG00000076067.10	0.00562674	0.69766
ENSG00000076108.10	0.00728265	0.113757
ENSG00000076344.14	-0.389409	0.0200459
ENSG00000076706.13	0.000239598	0.888902
ENSG00000077092.17	-0.0828203	0.0585475
ENSG00000077097.12	0.00810308	0.0585797
ENSG00000077150.16	0.00683144	0.00461099
ENSG00000078061.11	0.0016383	0.539959
ENSG00000078814.14	0.00215181	0.459931
ENSG00000081181.6	0.00806563	0.0630449
ENSG00000082014.15	0.000209585	0.980244
ENSG00000083812.10	0.060847	0.00410861
ENSG00000084693.14	0.0158225	0.0617208
ENSG00000084754.9	-0.000154636	0.853786
ENSG00000086159.11	-0.00267485	0.668396
ENSG00000087087.17	0.0105699	0.0107407
ENSG00000087191.11	0.00200502	0.10885
ENSG00000088038.16	0.00919545	0.275555
ENSG00000089050.13	0.00119606	0.841815
ENSG00000089163.4	0.0447091	0.468519
ENSG00000089486.15	0.00435746	0.278118
ENSG00000089820.14	-0.00316788	0.36292
ENSG00000090097.19	0.00317315	0.606308
ENSG00000090975.11	-0.00221692	0.640752
ENSG00000091622.14	-0.0472129	0.324435
ENSG00000092010.13	0.000907097	0.344358
ENSG00000092051.15	-0.574728	0.045143
ENSG00000092108.19	-0.00459676	0.652821
ENSG00000092758.14	0.00325027	0.360261
ENSG00000092820.16	0.000793691	0.547972
ENSG00000093144.17	0.000656592	0.876372
ENSG00000096063.13	0.00906363	0.0542242
ENSG00000096384.18	0.000271062	0.142114
ENSG00000099365.8	-0.00876339	0.730463
ENSG00000099377.12	0.00405706	0.0435947
ENSG00000099795.5	0.000242552	0.826683
ENSG00000099797.10	0.00150306	0.366492
ENSG00000099800.6	-0.00114945	0.484319
ENSG00000099817.10	-0.000859373	0.516945
ENSG00000099821.12	0.00154861	0.521719
ENSG00000099822.2	0.0384025	0.0751755
ENSG00000099899.13	0.00594629	0.289078
ENSG00000099904.14	-0.0109797	0.193703
ENSG00000099956.16	-0.000190621	0.965581
ENSG00000099957.15	0.015564	0.669698
ENSG00000099958.13	-0.00951559	0.220088
ENSG00000099960.11	-0.153809	0.288701
ENSG00000100079.6	-0.0153859	0.382102
ENSG00000100139.12	0.00327739	0.510865
ENSG00000100196.9	0.00259987	0.476162
ENSG00000100201.17	0.000128759	0.821972
ENSG00000100220.10	1.97093e-06	0.999502
ENSG00000100239.14	-0.000795958	0.559119
ENSG00000100241.19	0.00566867	0.0874732
ENSG00000100276.9	-0.520809	0.182519
ENSG00000100359.19	0.00648162	0.236962
ENSG00000100417.10	0.00122131	0.534447
ENSG00000100433.14	0.0965694	0.562973
ENSG00000100522.7	-0.00439164	0.363285
ENSG00000100767.14	-0.00387627	0.367655
ENSG00000100908.12	0.00151144	0.882057
ENSG00000100918.11	-0.0110353	0.69824
ENSG00000100979.13	-0.000633696	0.59983
ENSG00000100982.10	0.0127349	0.219302
ENSG00000100991.10	0.00553156	0.176288
ENSG00000101003.9	0.0363565	0.000426463
ENSG00000101004.13	0.0113913	0.154479
ENSG00000101082.12	-0.11187	0.0836684
ENSG00000101084.15	0.00548841	0.255011
ENSG00000101158.11	0.00588586	0.0181675
ENSG00000101160.12	-6.84684e-05	0.897913
ENSG00000101190.11	0.0135286	0.496654
ENSG00000101220.16	0.00737264	0.0636294
ENSG00000101298.12	-0.0165552	0.741173
ENSG00000101343.13	0.0161552	0.0773548
ENSG00000101384.10	0.000363937	0.859752
ENSG00000101460.11	-0.00529846	0.103537
ENSG00000101464.9	0.0125569	0.0349874
ENSG00000101882.8	0.00331471	0.724888
ENSG00000102007.9	0.00410098	0.0225822
ENSG00000102109.8	-0.00487843	0.366132
ENSG00000102144.12	7.37283e-05	0.903623
ENSG00000102302.7	-0.0102724	0.57202
ENSG00000102362.14	-0.00816327	0.157205
ENSG00000102710.18	0.00987688	0.540167
ENSG00000102854.13	-0.125363	0.321109
ENSG00000102978.11	0.00284842	0.346342
ENSG00000102984.13	0.0900378	0.434668
ENSG00000103024.6	0.000659418	0.870881
ENSG00000103044.9	0.0450776	0.371454
ENSG00000103067.10	-0.00370295	0.253462
ENSG00000103111.13	0.00717925	0.443017
ENSG00000103126.13	0.0211462	0.00261792
ENSG00000103264.14	0.00021212	0.872753
ENSG00000103351.11	0.0526949	0.00805898
ENSG00000103415.10	-0.0011222	0.635243
ENSG00000103479.13	-0.00190003	0.586102
ENSG00000103510.18	0.000660062	0.954177
ENSG00000104341.15	0.000956503	0.139683
ENSG00000104524.12	0.00377789	0.274989
ENSG00000104660.16	-0.00243522	0.654012
ENSG00000104679.9	0.000799197	0.910282
ENSG00000104859.13	0.00576269	0.207892
ENSG00000104903.4	-0.0980846	0.0534165
ENSG00000104936.16	0.00614694	0.235121
ENSG00000104964.13	2.20733e-06	0.997817
ENSG00000105135.14	-0.00321587	0.099107
ENSG00000105137.11	-0.033212	0.0813321
ENSG00000105258.7	0.00695308	0.171974
ENSG00000105325.12	-0.00498766	0.300285
ENSG00000105355.7	0.00183669	0.728106
ENSG00000105364.12	-0.00231604	0.467457
ENSG00000105373.17	0.000567836	0.310925
ENSG00000105556.9	0.00356124	0.831545
ENSG00000105617.3	0.00706568	0.681443
ENSG00000105655.17	-0.00195995	0.31714
ENSG00000105656.11	-0.00591622	0.731847
ENSG00000105662.14	-0.00816047	0.654887
ENSG00000105664.9	-0.0159282	0.375536
ENSG00000105701.14	0.000108178	0.877035
ENSG00000105708.8	0.0207716	0.662162
ENSG00000105856.12	-0.00297633	0.55379
ENSG00000105877.16	0.0264224	0.153173
ENSG00000105996.6	-0.419656	0.251068
ENSG00000106077.17	0.00180719	0.838373
ENSG00000106123.10	-0.00275871	0.692617
ENSG00000106346.10	0.00576671	0.8301
ENSG00000106367.12	0.00310818	0.449619
ENSG00000106484.13	0.000628912	0.363082
ENSG00000106624.7	-0.00310409	0.0145345
ENSG00000106628.9	0.00119542	0.456548
ENSG00000106948.15	-0.0194221	0.0220804
ENSG00000106991.12	-0.00665922	0.000428542
ENSG00000107159.11	0.0015196	0.164444
ENSG00000107201.8	-0.000610459	0.95036
ENSG00000107404.16	0.00453305	0.0921107
ENSG00000107581.11	0.000645029	0.623226
ENSG00000107672.13	0.0153344	0.0989151
ENSG00000107736.18	-0.0047377	0.49071
ENSG00000107829.12	0.00145918	0.766468
ENSG00000107872.11	-0.00245831	0.752101
ENSG00000107874.9	0.00519691	0.31904
ENSG00000107902.12	-0.00240394	0.409658
ENSG00000108262.14	0.0114081	0.045947
ENSG00000108309.11	0.0510129	0.531546
ENSG00000108556.7	-0.102347	0.0600803
ENSG00000108591.8	-0.0137021	0.198026
ENSG00000108592.15	0.0127037	0.00192321
ENSG00000108602.16	0.000248789	0.0524401
ENSG00000108604.14	0.00255184	0.286446
ENSG00000108788.10	0.00719566	0.0237656
ENSG00000108797.10	0.0130454	0.339556
ENSG00000108799.11	0.0299565	0.0160667
ENSG00000108840.14	0.00434719	0.181331
ENSG00000108846.14	0.000793591	0.322579
ENSG00000108854.14	0.0232737	0.105407
ENSG00000108924.12	-0.000434262	0.567178
ENSG00000108963.16	-0.0199984	0.23978
ENSG00000109519.11	-0.00530812	0.206935
ENSG00000109686.15	-0.00233834	0.34683
ENSG00000109956.11	-0.00210319	0.711269
ENSG00000110042.6	-0.00181845	0.629451
ENSG00000110395.4	0.0102481	0.531607
ENSG00000110697.11	-0.00244536	0.728087
ENSG00000110700.5	0.000535021	0.276804
ENSG00000110711.8	-0.00325868	0.430249
ENSG00000110925.5	0.0177275	0.214316
ENSG00000111077.16	-0.00296091	0.214471
ENSG00000111087.8	-0.0165885	0.765798
ENSG00000111276.9	0.00238065	0.660714
ENSG00000111344.10	0.00236367	0.936417
ENSG00000111445.12	0.0369032	0.00197907
ENSG00000111669.13	0.000356026	0.438891
ENSG00000111671.8	0.00513338	0.745665
ENSG00000112137.15	-0.0624171	0.17767
ENSG00000112511.16	0.00130818	0.760852
ENSG00000112514.14	0.000594076	0.434647
ENSG00000113716.11	0.0375755	2.53935e-05
ENSG00000113758.12	0.00195174	0.482675
ENSG00000113763.9	-0.0775343	0.155735
ENSG00000114354.11	-0.000750412	0.772136
ENSG00000115053.14	0.00128599	0.116352
ENSG00000115155.15	0.0651559	0.0694497
ENSG00000115232.12	-0.0556091	0.0828219
ENSG00000115275.10	0.00664006	0.148229
ENSG00000115297.10	0.143526	0.60679
ENSG00000115310.16	0.000367938	0.648476
ENSG00000115325.12	-0.0486218	0.189215
ENSG00000115657.11	0.01724	0.0850427
ENSG00000115841.18	-0.0672089	0.000554206
ENSG00000116005.10	-0.00127648	0.293611
ENSG00000116161.16	0.00672801	0.0301185
ENSG00000116176.6	0.0422692	0.469269
ENSG00000116221.14	0.0008641	0.680905
ENSG00000116254.16	0.0766549	0.720444
ENSG00000116329.9	0.0408249	0.253269
ENSG00000116478.10	0.00608459	0.0282069
ENSG00000116957.11	-0.00288874	0.621712
ENSG00000117308.13	0.000504036	0.843911
ENSG00000117411.15	0.0048809	0.304096
ENSG00000117419.13	0.00997393	0.021803
ENSG00000118094.10	-0.00720906	0.444047
ENSG00000118518.14	0.0118446	0.42506
ENSG00000118873.14	-0.00451591	0.525522
ENSG00000118997.12	0.152887	0.361038
ENSG00000119041.9	0.0464228	0.00517417
ENSG00000119396.9	0.00023692	0.938937
ENSG00000119397.15	0.00130497	0.922029
ENSG00000119408.15	0.000757919	0.775263
ENSG00000119522.14	-0.00754985	0.365929
ENSG00000119689.13	-0.00454819	0.0471124
ENSG00000119698.10	-0.0861224	0.00177244
ENSG00000119915.4	0.2035	0.00240801
ENSG00000119986.6	8.72177e-06	0.998761
ENSG00000120333.4	-0.00783527	0.341085
ENSG00000120699.11	0.00321191	0.862238
ENSG00000120784.14	0.0664185	0.0390394
ENSG00000120860.9	0.000208707	0.971489
ENSG00000120948.14	0.0121449	0.0296309
ENSG00000121053.5	-0.606046	0.584572
ENSG00000121075.8	-0.00252701	0.681156
ENSG00000121653.10	0.0115113	0.384007
ENSG00000122033.13	-0.0098634	0.108707
ENSG00000122034.11	0.000833019	0.550625
ENSG00000122203.13	0.00254316	0.309584
ENSG00000122674.10	0.0302093	0.560644
ENSG00000122696.11	0.041273	0.195431
ENSG00000122729.17	0.00042716	0.551833
ENSG00000122735.14	-0.125614	0.427057
ENSG00000122971.7	-0.00169441	0.271462
ENSG00000123136.13	0.00231536	0.373551
ENSG00000123143.11	0.00155918	0.28077
ENSG00000123146.18	0.00234581	0.492889
ENSG00000123329.16	-0.0268299	0.169405
ENSG00000123342.14	-0.0198204	0.282672
ENSG00000123395.13	0.00447625	0.710901
ENSG00000123485.10	0.0482044	2.21502e-05
ENSG00000123737.11	0.0261312	0.063333
ENSG00000123870.10	0.0170528	0.91473
ENSG00000124151.17	-0.00339845	0.453632
ENSG00000124541.6	0.00749878	0.215687
ENSG00000124574.13	0.00495566	0.678727
ENSG00000124587.12	0.00494768	0.0175041
ENSG00000124593.13	0.03704	0.219933
ENSG00000124713.5	0.000486023	0.414905
ENSG00000124915.9	0.415283	0.173982
ENSG00000124939.5	-0.00486056	0.963973
ENSG00000125037.11	0.000580382	0.759291
ENSG00000125148.6	1.28901e-05	0.832373
ENSG00000125149.10	-0.00172561	0.734245
ENSG00000125170.9	0.00418397	0.116403
ENSG00000125257.12	0.0038544	0.402513
ENSG00000125355.14	0.0193475	0.137196
ENSG00000125520.12	0.001237	0.258688
ENSG00000125650.4	-0.0436845	0.540247
ENSG00000125652.6	-0.00168111	0.368474
ENSG00000125741.4	0.00286618	0.684419
ENSG00000125753.12	0.00407262	0.0774567
ENSG00000125775.13	0.000731719	0.866783
ENSG00000126010.5	-0.0233293	0.435167
ENSG00000126246.8	0.0374388	0.0472143
ENSG00000126247.9	0.000101138	0.879328
ENSG00000126464.12	0.00944557	0.32188
ENSG00000126500.3	0.10018	0.528656
ENSG00000126603.7	0.00691256	0.284261
ENSG00000126778.8	0.0543916	0.265768
ENSG00000126895.12	-0.502861	0.0826043
ENSG00000127311.8	0.0180137	0.73792
ENSG00000127533.3	-0.0226052	0.178492
ENSG00000127564.15	0.0465754	0.00137236
ENSG00000127585.10	-0.000172237	0.990085
ENSG00000127948.12	0.000100032	0.630913
ENSG00000128016.5	-0.00101009	0.274801
ENSG00000128191.12	0.00341408	0.817377
ENSG00000128283.6	-0.000681738	0.469228
ENSG00000128346.9	0.113891	0.468219
ENSG00000128463.11	0.000483107	0.919494
ENSG00000128482.14	-0.491043	0.0191154
ENSG00000128563.12	0.0037584	0.732238
ENSG00000128564.6	-0.0114085	0.676296
ENSG00000128595.15	0.00283704	0.109082
ENSG00000128617.2	0.0568314	0.246518
ENSG00000128709.11	0.0892302	0.00109598
ENSG00000129103.16	0.00031768	0.853498
ENSG00000129195.14	0.0539181	0.0337563
ENSG00000129347.18	0.021736	0.0555203
ENSG00000129451.10	-0.0619305	0.509531
ENSG00000129691.14	0.00944022	0.192565
ENSG00000129910.6	-0.00195922	0.83428
ENSG00000129951.17	0.44576	0.383917
ENSG00000129968.14	-0.00270607	0.828594
ENSG00000130244.11	0.0100327	0.529858
ENSG00000130487.5	0.0076609	0.294196
ENSG00000130511.14	0.000850578	0.902514
ENSG00000130545.14	-0.0147213	0.25576
ENSG00000130584.9	0.0107032	0.485753
ENSG00000130702.12	0.000805868	0.509038
ENSG00000130706.11	0.000716828	0.685632
ENSG00000130714.14	0.0092392	0.224291
ENSG00000130717.11	0.00127935	0.765813
ENSG00000130734.8	-0.00506971	0.746095
ENSG00000130748.6	0.00761128	0.641957
ENSG00000130751.8	-0.0375935	0.449721
ENSG00000130758.6	0.0357088	0.0998957
ENSG00000130811.9	0.000516574	0.681472
ENSG00000130812.9	-0.00899458	0.745613
ENSG00000130813.16	-0.00175068	0.485717
ENSG00000130826.14	0.0109921	0.0247875
ENSG00000130827.6	0.0101923	0.161806
ENSG00000130830.13	-0.000751552	0.803929
ENSG00000130876.10	-0.0102042	0.324927
ENSG00000130881.12	-0.00234352	0.434829
ENSG00000131149.16	-0.00301782	0.564342
ENSG00000131153.7	0.0249474	0.0118107
ENSG00000131188.10	0.0231472	0.43039
ENSG00000131236.15	0.00168475	0.426152
ENSG00000131238.15	0.00779948	0.0123544
ENSG00000131389.15	-0.00376425	0.496468
ENSG00000131470.13	0.240326	3.31185e-06
ENSG00000131584.17	0.0113013	0.0399714
ENSG00000131650.12	-0.0991283	0.407142
ENSG00000131788.14	0.0373404	0.0139096
ENSG00000131899.9	0.0170366	0.222417
ENSG00000132153.13	0.00954189	0.060058
ENSG00000132155.10	0.00156142	0.523847
ENSG00000132313.13	-0.00351835	0.634475
ENSG00000132388.11	-0.0192522	0.0222423
ENSG00000132507.16	0.000136487	0.828577
ENSG00000132613.13	-0.000349348	0.942965
ENSG00000132622.9	-0.0603771	0.057634
ENSG00000132793.10	0.0166525	0.105979
ENSG00000133019.10	0.0124807	0.36996
ENSG00000133055.7	-0.0376241	0.687251
ENSG00000133318.12	0.00408643	0.0141209
ENSG00000133794.16	-0.0174063	0.119249
ENSG00000133805.14	-0.0050948	0.881325
ENSG00000133961.18	-0.00914806	0.123037
ENSG00000134013.14	0.00219044	0.746213
ENSG00000134317.16	0.00396556	0.824444
ENSG00000134318.12	0.00134637	0.695471
ENSG00000134398.11	-0.0451819	0.682891
ENSG00000134480.12	-0.00202418	0.865118
ENSG00000134668.11	0.0336576	0.0582634
ENSG00000134684.9	0.0038066	0.0822035
ENSG00000134697.11	0.021843	2.96353e-05
ENSG00000134769.20	-0.00172827	0.749695
ENSG00000134780.8	0.00227944	0.903124
ENSG00000135093.11	7.51299e-05	0.993422
ENSG00000135144.6	-0.00226084	0.562393
ENSG00000135365.14	0.0221417	0.026228
ENSG00000135414.8	0.0154238	0.146053
ENSG00000135451.11	0.030386	0.000553736
ENSG00000135597.17	0.00724449	0.458588
ENSG00000135678.10	0.00526683	0.0403868
ENSG00000135749.17	0.0109357	0.576188
ENSG00000135778.10	0.00189462	0.61505
ENSG00000135945.8	0.0184553	0.278191
ENSG00000136048.12	-0.000344498	0.967285
ENSG00000136059.13	-0.208879	0.0146347
ENSG00000136478.6	0.0040902	0.144984
ENSG00000136854.16	0.00746126	0.48717
ENSG00000136877.13	0.00216233	0.353836
ENSG00000136881.10	4.15244e-05	0.782718
ENSG00000136930.11	0.00168821	0.182448
ENSG00000137070.16	0.00536429	0.44718
ENSG00000137154.11	0.000106612	0.35721
ENSG00000137200.11	0.0027553	0.568739
ENSG00000137267.5	-0.00158338	0.520937
ENSG00000137274.11	-0.00331639	0.189864
ENSG00000137563.10	5.95743e-05	0.84357
ENSG00000137575.10	-0.00077215	0.455731
ENSG00000137825.9	0.0129269	0.143134
ENSG00000137841.10	-0.0273752	0.142385
ENSG00000137877.9	-0.0578806	0.106024
ENSG00000138061.10	0.00125179	0.000918228
ENSG00000138073.12	0.000249771	0.81495
ENSG00000138100.12	0.0296542	0.00185193
ENSG00000138193.13	-0.0293329	0.140893
ENSG00000138794.8	0.0185761	0.278858
ENSG00000138834.11	0.0110126	0.0535795
ENSG00000139044.9	-0.00772812	0.712242
ENSG00000139540.10	-0.00135103	0.105426
ENSG00000139645.9	0.012489	0.0179163
ENSG00000139835.12	0.000528142	0.902982
ENSG00000140093.8	-0.00214465	0.000593332
ENSG00000140104.12	0.0274441	0.380875
ENSG00000140199.10	-0.00526552	0.811742
ENSG00000140854.11	0.0217325	0.10491
ENSG00000140859.14	-0.00286748	0.390699
ENSG00000140876.10	0.0018662	0.850835
ENSG00000140931.18	-0.00196124	0.717023
ENSG00000140939.13	0.0109014	0.0614464
ENSG00000140990.13	0.000736215	0.599687
ENSG00000141068.12	0.0172565	0.295135
ENSG00000141179.12	-0.00130341	0.658542
ENSG00000141219.14	0.0456864	0.00260787
ENSG00000141349.7	-0.000230403	0.950403
ENSG00000141401.10	0.00451301	0.206276
ENSG00000141447.15	0.00246925	0.793332
ENSG00000141503.14	-0.0100928	0.0823081
ENSG00000141522.10	0.00148488	0.243863
ENSG00000141564.12	0.0141122	0.0239302
ENSG00000141744.3	0.0232278	0.127167
ENSG00000141934.8	-0.000394612	0.875293
ENSG00000142186.15	-0.00110238	0.700111
ENSG00000142197.11	0.00513611	0.252366
ENSG00000142208.14	-0.000993545	0.7411
ENSG00000142632.15	-0.0151571	0.623595
ENSG00000143125.5	-0.0801903	0.380656
ENSG00000143157.10	0.0102581	0.00328184
ENSG00000143198.11	0.000721598	0.669997
ENSG00000143318.11	-0.393003	0.289972
ENSG00000143340.6	-0.0261308	0.505829
ENSG00000143382.12	-0.00121875	0.648486
ENSG00000143442.20	0.00216944	0.398394
ENSG00000143494.14	0.0243351	0.291958
ENSG00000143552.8	0.141689	0.00651176
ENSG00000143553.9	0.0103679	0.203081
ENSG00000143621.15	0.00301497	0.0732185
ENSG00000143748.16	0.0230427	0.129589
ENSG00000143819.11	-4.63094e-05	0.270965
ENSG00000143845.13	0.000762589	0.236592
ENSG00000143862.6	-0.00415383	0.319719
ENSG00000143952.18	0.00170655	0.837876
ENSG00000143977.12	0.0121587	0.0866766
ENSG00000143994.12	-0.00111798	0.94258
ENSG00000144045.12	0.0104777	0.532547
ENSG00000144395.16	0.0309565	0.291287
ENSG00000144596.10	0.0544435	0.362449
ENSG00000144597.12	0.0146002	0.125077
ENSG00000144746.6	-0.00175081	0.671038
ENSG00000144857.13	-0.129188	0.0273069
ENSG00000145244.10	0.0132048	0.401751
ENSG00000145246.12	0.0100845	0.501647
ENSG00000145386.8	0.00299223	0.260601
ENSG00000145416.12	-0.00735835	0.809818
ENSG00000145715.13	-0.0129004	0.350263
ENSG00000145901.13	0.00125564	0.218871
ENSG00000146223.13	0.00288897	0.221572
ENSG00000146426.16	-0.0425205	0.117062
ENSG00000146477.5	-0.00163663	0.57778
ENSG00000146556.13	-0.00274311	0.966873
ENSG00000146830.9	0.0135014	0.00926007
ENSG00000147119.3	0.00589304	0.69863
ENSG00000147465.10	-0.0505859	0.594251
ENSG00000147573.15	-0.000901845	0.660334
ENSG00000147912.11	-0.00119807	0.961131
ENSG00000148082.8	-0.0252671	0.687053
ENSG00000148204.10	-0.447748	0.261342
ENSG00000148337.18	0.0163708	0.00117976
ENSG00000148358.18	0.00803312	0.0499552
ENSG00000148362.9	0.00699182	0.115391
ENSG00000148600.13	0.000433192	0.946655
ENSG00000148702.13	-0.000338086	0.355612
ENSG00000148824.17	0.018199	0.366594
ENSG00000148925.9	0.0202724	0.385138
ENSG00000149179.12	0.0049019	0.719134
ENSG00000149182.13	0.00149611	0.610713
ENSG00000149243.14	-0.0960714	0.35181
ENSG00000149273.13	5.44723e-05	0.741641
ENSG00000149328.13	0.0139209	0.645188
ENSG00000149346.13	0.0261141	0.416624
ENSG00000149489.7	-0.03576	0.491544
ENSG00000149541.8	0.00220275	0.452858
ENSG00000149782.10	0.0145975	0.262682
ENSG00000149922.9	0.122258	0.329837
ENSG00000149923.12	0.00410972	0.0960714
ENSG00000149929.14	-0.00343833	0.616605
ENSG00000149930.16	0.00372122	0.442515
ENSG00000149968.10	0.0705265	0.117414
ENSG00000149970.13	-0.0406914	0.115819
ENSG00000150281.6	-0.00168403	0.977787
ENSG00000151117.7	0.00139698	0.916593
ENSG00000151364.14	0.0154704	0.504002
ENSG00000151365.2	-0.000501619	0.49335
ENSG00000151366.11	0.000332896	0.845267
ENSG00000152382.5	0.00373606	0.578847
ENSG00000153162.8	0.00287316	0.890648
ENSG00000153944.9	0.00750923	0.195099
ENSG00000154040.19	0.0134497	0.0015422
ENSG00000154146.11	0.0112642	0.73447
ENSG00000154175.15	-0.0700641	0.00230235
ENSG00000154222.13	0.024543	0.00101679
ENSG00000154639.17	0.000834125	0.754606
ENSG00000154640.13	0.0143804	0.285889
ENSG00000154864.10	0.00150486	0.701687
ENSG00000154945.6	0.0123714	0.154984
ENSG00000155252.13	-0.0128569	0.151477
ENSG00000155363.17	0.00145728	0.604921
ENSG00000155366.15	-0.000100818	0.90783
ENSG00000155506.15	0.00209229	0.180758
ENSG00000155749.11	0.578131	0.0885872
ENSG00000155850.7	0.00502807	0.716008
ENSG00000155974.10	-0.110752	0.501823
ENSG00000156096.11	5.99729e-05	0.575814
ENSG00000156381.7	0.00116687	0.873113
ENSG00000156642.15	0.0040145	0.354206
ENSG00000157017.14	-0.509933	0.158852
ENSG00000157020.16	0.00202982	0.323498
ENSG00000157077.13	0.0169327	0.236282
ENSG00000157111.11	-0.00550293	0.803472
ENSG00000157216.14	0.000979734	0.638188
ENSG00000157368.9	-0.0416011	0.0478493
ENSG00000157593.15	0.00353233	0.227187
ENSG00000157833.11	0.00818477	0.765126
ENSG00000157856.9	0.119444	0.528176
ENSG00000158008.8	0.0786915	0.392485
ENSG00000158014.13	0.00214201	0.699405
ENSG00000158158.10	0.0315363	0.00837289
ENSG00000158417.9	0.00533	0.00197401
ENSG00000158483.14	0.0594338	0.00209147
ENSG00000158526.7	0.00393585	0.513065
ENSG00000158552.11	-0.000250608	0.945498
ENSG00000158578.17	-0.917442	0.139189
ENSG00000158623.13	0.00673201	0.544153
ENSG00000158792.14	-0.00238544	0.749123
ENSG00000158828.5	-0.00584035	0.161392
ENSG00000159023.17	0.0017638	0.661754
ENSG00000159184.7	0.00270687	0.924046
ENSG00000159247.11	0.0130401	0.802298
ENSG00000159263.14	-0.0396953	0.372209
ENSG00000159267.13	0.00682193	0.49893
ENSG00000159374.16	0.0201485	0.937714
ENSG00000159377.9	0.000102138	0.836576
ENSG00000159792.8	0.00962215	0.155968
ENSG00000159842.13	-0.012457	0.132199
ENSG00000160050.13	0.00341781	0.721927
ENSG00000160111.11	0.0388673	0.463296
ENSG00000160172.9	-0.0220078	0.723554
ENSG00000160214.11	0.00997945	0.0495709
ENSG00000160325.13	-0.00242017	0.247265
ENSG00000160326.12	-0.00257184	0.794917
ENSG00000160404.16	0.0150257	0.321083
ENSG00000160469.15	0.0305651	0.50509
ENSG00000160781.14	0.000169533	0.996075
ENSG00000160818.15	0.00682908	0.125848
ENSG00000160883.9	0.0135055	0.562066
ENSG00000160951.3	-0.323531	0.0799649
ENSG00000161082.11	0.0497228	0.0595325
ENSG00000161091.11	0.0059119	0.137903
ENSG00000161281.9	-0.00348187	0.423481
ENSG00000161395.11	-0.00142366	0.70192
ENSG00000161682.13	0.0596505	0.185563
ENSG00000161800.11	0.0283322	3.78418e-05
ENSG00000162066.13	-0.000499886	0.947138
ENSG00000162078.10	0.0150063	0.26692
ENSG00000162241.11	0.0104174	0.291133
ENSG00000162434.10	-0.000990216	0.639239
ENSG00000162437.13	0.0138072	0.374445
ENSG00000162522.9	0.00491289	0.00634684
ENSG00000162572.18	0.0164629	0.30453
ENSG00000162729.12	0.00109913	0.242313
ENSG00000162885.11	0.00727682	0.794439
ENSG00000162892.14	-0.0635346	0.469775
ENSG00000162894.10	-0.0362233	0.230533
ENSG00000162976.11	0.0118367	0.37721
ENSG00000163154.5	-0.0293847	0.432177
ENSG00000163155.10	0.0135264	0.331552
ENSG00000163156.10	0.00482907	0.212323
ENSG00000163159.10	0.00482599	0.155532
ENSG00000163249.8	0.00988858	0.379326
ENSG00000163251.3	0.000115325	0.967059
ENSG00000163380.14	-0.308248	0.822158
ENSG00000163382.10	0.000184233	0.867953
ENSG00000163485.14	0.0208821	0.0280209
ENSG00000163499.10	-0.823498	0.152919
ENSG00000163697.15	-0.00486754	0.390137
ENSG00000163703.16	-0.0028829	0.585854
ENSG00000163704.10	0.0297849	0.731209
ENSG00000163794.6	0.125127	0.0806999
ENSG00000163806.14	0.458606	0.145844
ENSG00000163879.10	0.00250377	0.676328
ENSG00000163938.15	0.0062788	0.0248641
ENSG00000164054.14	0.00266947	0.0540083
ENSG00000164062.11	-0.00134227	0.493683
ENSG00000164070.10	0.0143044	0.0332963
ENSG00000164099.3	-0.0133995	0.543201
ENSG00000164296.6	0.00554651	0.902561
ENSG00000164597.12	0.0159209	0.233548
ENSG00000164649.18	0.0425589	0.00575302
ENSG00000164663.12	0.0783569	0.0516104
ENSG00000164674.14	-0.0944698	0.172398
ENSG00000164742.13	-0.000144296	0.943747
ENSG00000164776.8	-0.142717	0.42287
ENSG00000164808.15	0.000291286	0.945434
ENSG00000164855.14	0.00086701	0.849046
ENSG00000164889.11	0.00236266	0.129476
ENSG00000164896.18	0.00197283	0.323411
ENSG00000164902.12	0.0117099	0.143934
ENSG00000164932.11	0.00410343	0.456691
ENSG00000165125.16	-0.0242975	0.196146
ENSG00000165458.12	0.00315853	0.363915
ENSG00000165905.15	0.00469258	0.581569
ENSG00000165983.13	0.0128678	0.204258
ENSG00000165985.9	0.0279205	0.852758
ENSG00000166004.13	0.0459247	0.141469
ENSG00000166171.11	0.0348289	0.0496031
ENSG00000166311.8	-0.00075846	0.778337
ENSG00000166313.17	0.00307376	0.775671
ENSG00000166428.11	-0.0959372	0.0928495
ENSG00000166507.15	0.300376	0.136765
ENSG00000166575.15	-0.00460887	0.540916
ENSG00000166763.7	-0.00154135	0.972721
ENSG00000166816.12	-0.00135268	0.326983
ENSG00000166851.13	0.0207573	0.00397599
ENSG00000166856.2	-0.272267	0.00758629
ENSG00000166860.2	0.0253951	0.434985
ENSG00000166971.15	-0.00132686	0.88758
ENSG00000167094.14	-1.192	0.0351078
ENSG00000167105.6	-0.00140539	0.802195
ENSG00000167106.10	-0.00020309	0.919201
ENSG00000167118.9	0.00874009	0.0114722
ENSG00000167220.10	-0.0190642	0.143125
ENSG00000167280.15	0.0212197	0.0164945
ENSG00000167281.17	0.791926	0.0271309
ENSG00000167311.12	-0.0363553	0.702187
ENSG00000167460.13	0.00050249	0.599041
ENSG00000167468.15	-0.000137203	0.716865
ENSG00000167513.7	0.00865534	0.0333514
ENSG00000167535.6	0.0186159	0.516153
ENSG00000167543.14	0.00165499	0.690133
ENSG00000167549.17	-0.00242873	0.970323
ENSG00000167644.10	0.0239922	0.0110503
ENSG00000167645.15	0.00338034	0.210702
ENSG00000167670.14	0.0126145	0.138816
ENSG00000167671.10	-0.00134961	0.512652
ENSG00000167748.9	-0.263503	0.410321
ENSG00000167771.5	0.0502511	0.104681
ENSG00000167778.7	-0.00399557	0.568802
ENSG00000167863.10	0.00172934	0.100425
ENSG00000167889.11	-0.0258185	0.639856
ENSG00000167930.14	0.00308865	0.137385
ENSG00000167967.14	0.010781	0.171159
ENSG00000167968.11	-0.0166242	0.627013
ENSG00000167969.11	-0.000672955	0.562981
ENSG00000167984.15	-0.167321	0.00926737
ENSG00000168056.13	-0.00110197	0.474329
ENSG00000168060.13	0.00237393	0.573797
ENSG00000168061.12	0.0131656	0.0832759
ENSG00000168234.11	-0.000445628	0.534164
ENSG00000168256.16	0.0140747	0.0170078
ENSG00000168268.9	0.00417457	0.0275571
ENSG00000168350.7	-0.0912855	0.104875
ENSG00000168427.8	0.0410686	0.0134349
ENSG00000168477.16	-0.0327067	0.0104054
ENSG00000168743.11	0.000865402	0.787596
ENSG00000168802.11	0.000610922	0.906036
ENSG00000168827.13	-0.0019319	0.677102
ENSG00000168913.6	-0.000524088	0.87241
ENSG00000168995.12	-0.0516087	0.591942
ENSG00000169188.4	0.00629858	0.451564
ENSG00000169258.6	0.0823188	8.6987e-05
ENSG00000169372.11	-0.0122568	0.323499
ENSG00000169583.12	0.0300885	0.271703
ENSG00000169641.12	0.00851999	0.63421
ENSG00000169692.11	-0.000224051	0.790955
ENSG00000169718.16	0.00285006	0.0287561
ENSG00000169727.11	0.00282271	0.0417905
ENSG00000169764.13	-0.00112844	0.0392414
ENSG00000169885.8	0.0857132	0.472329
ENSG00000169962.4	-0.0126639	0.646481
ENSG00000169972.10	0.0117487	0.280164
ENSG00000169994.17	-0.0120762	0.202682
ENSG00000170035.14	0.0156385	0.0299295
ENSG00000170049.8	-0.460316	0.202002
ENSG00000170075.8	0.00116253	0.991972
ENSG00000170085.16	0.0085928	0.347887
ENSG00000170142.10	0.0205465	0.00702577
ENSG00000170271.9	-0.00102643	0.493146
ENSG00000170291.13	0.00442202	0.449753
ENSG00000170382.10	0.00446129	0.660985
ENSG00000170473.15	0.0116208	0.135394
ENSG00000170684.7	0.0535821	0.0577673
ENSG00000170776.18	-0.00434403	0.153161
ENSG00000170779.10	0.0395374	0.0229316
ENSG00000171103.9	0.009873	0.752752
ENSG00000171262.10	0.013672	0.461869
ENSG00000171462.13	0.0581498	0.235879
ENSG00000171603.15	0.000831144	0.654116
ENSG00000171608.14	-0.0170356	0.26777
ENSG00000171777.14	-0.0217318	0.8781
ENSG00000171817.15	-0.0229144	0.856442
ENSG00000171840.10	0.00464463	0.305114
ENSG00000172059.9	-0.00186293	0.713837
ENSG00000172247.3	-0.777328	0.128048
ENSG00000172346.13	-0.0399698	0.429403
ENSG00000172354.8	0.0006993	0.657818
ENSG00000172367.14	0.139924	0.0580284
ENSG00000172460.13	0.00619218	0.956919
ENSG00000172476.3	-0.509914	0.436992
ENSG00000172500.11	0.00172244	0.754657
ENSG00000172531.13	-0.00146548	0.384846
ENSG00000172543.6	-0.0312572	0.156631
ENSG00000172575.10	-0.0998732	0.0912116
ENSG00000172613.6	0.0118164	0.413934
ENSG00000172650.11	0.638555	0.372519
ENSG00000172725.12	-0.00276403	0.322471
ENSG00000172889.14	-0.00400416	0.0652413
ENSG00000172935.8	-0.00705756	0.359513
ENSG00000173011.11	-0.0167337	0.109838
ENSG00000173124.13	-0.410601	0.443073
ENSG00000173137.10	0.00695399	0.389979
ENSG00000173145.10	0.0387849	0.122016
ENSG00000173338.11	-0.272052	0.459778
ENSG00000173418.10	0.00119615	0.597064
ENSG00000173442.10	0.00290582	0.714174
ENSG00000173482.15	-0.00257137	0.536095
ENSG00000173846.11	-0.0071986	0.660533
ENSG00000173947.12	-0.00969287	0.849621
ENSG00000174243.8	0.013578	0.00655354
ENSG00000174292.11	-0.0271558	0.424498
ENSG00000174521.7	-0.725669	0.256835
ENSG00000174606.11	0.000944073	0.938101
ENSG00000175130.6	0.000823047	0.520762
ENSG00000175206.9	-0.54391	0.269003
ENSG00000175592.7	0.00770982	0.656339
ENSG00000175602.3	-0.00219432	0.714882
ENSG00000175634.13	-0.0050442	0.290154
ENSG00000176125.4	0.011378	0.840829
ENSG00000176728.6	0.0485328	0.167365
ENSG00000176871.7	0.00339371	0.374262
ENSG00000176884.13	-0.280392	0.259402
ENSG00000177045.7	0.0248943	0.243607
ENSG00000177191.2	0.0280438	0.471627
ENSG00000177370.4	-0.013636	0.409226
ENSG00000177485.6	-0.00278749	0.49128
ENSG00000177548.11	-0.00110503	0.925041
ENSG00000177628.14	0.00237991	0.209084
ENSG00000177731.14	-0.00223432	0.424251
ENSG00000177791.11	-0.688973	0.0653851
ENSG00000177839.6	0.0927278	0.1733
ENSG00000177954.10	0.00012159	0.572731
ENSG00000178028.12	0.011079	0.0735974
ENSG00000178149.15	0.00442943	0.814028
ENSG00000178252.16	0.0107372	0.0019337
ENSG00000178297.11	0.00149767	0.898279
ENSG00000178342.4	0.643625	0.243586
ENSG00000178460.16	0.120008	0.114273
ENSG00000178814.14	-0.00131061	0.453364
ENSG00000178821.11	0.0143839	0.406498
ENSG00000178836.6	0.534363	0.00136637
ENSG00000178947.8	-0.0377796	0.613275
ENSG00000179051.12	0.00713089	0.0399063
ENSG00000179057.12	0.0391979	0.75342
ENSG00000179222.16	-0.000774506	0.278558
ENSG00000179262.8	5.60024e-05	0.988198
ENSG00000179271.2	0.000423949	0.782053
ENSG00000179299.15	0.00944624	0.780767
ENSG00000179361.16	0.0202108	0.492499
ENSG00000179832.16	0.00199969	0.517631
ENSG00000179886.5	0.00722971	0.449853
ENSG00000180061.8	-0.00131715	0.873172
ENSG00000180098.8	0.0249125	0.115749
ENSG00000180279.5	-0.949939	0.407409
ENSG00000180385.7	0.263939	0.000118666
ENSG00000180448.9	-0.00243806	0.657592
ENSG00000180900.15	0.00097579	0.49909
ENSG00000180929.5	-0.178514	0.262258
ENSG00000181856.13	-0.0183589	0.133962
ENSG00000181885.17	-0.00212128	0.265352
ENSG00000182048.10	0.201565	0.120463
ENSG00000182179.9	-0.000264465	0.951398
ENSG00000182196.12	0.0710363	0.0843218
ENSG00000182199.9	0.000281307	0.739665
ENSG00000182484.13	0.0316664	0.232714
ENSG00000182518.12	0.0489235	0.060465
ENSG00000182578.12	-0.000893441	0.826969
ENSG00000182759.3	-0.000973008	0.899353
ENSG00000182796.11	-0.0171518	0.317835
ENSG00000182866.15	-0.0315578	0.0851216
ENSG00000183020.12	0.00342364	0.435653
ENSG00000183060.14	0.0500086	0.0160468
ENSG00000183066.13	0.507418	0.00651925
ENSG00000183426.14	0.00046448	0.993708
ENSG00000183723.11	0.000318916	0.960867
ENSG00000183773.14	-0.0423631	0.379518
ENSG00000183793.12	0.169306	0.167417
ENSG00000183798.4	0.0435442	0.773032
ENSG00000183889.11	1.45735	0.0154484
ENSG00000183963.17	0.0120023	0.00857726
ENSG00000184058.11	-0.167899	0.140986
ENSG00000184209.14	0.0101759	0.10269
ENSG00000184281.13	0.00125575	0.793325
ENSG00000184343.9	0.0269842	0.690132
ENSG00000184363.8	-0.00233908	0.826867
ENSG00000184481.15	-0.0163226	0.161206
ENSG00000184575.10	0.000398218	0.880777
ENSG00000184697.6	0.0584773	0.308363
ENSG00000184709.7	-0.129639	0.428755
ENSG00000184860.8	0.0245562	0.348933
ENSG00000184908.16	0.100179	0.816388
ENSG00000184956.14	0.000318117	0.555889
ENSG00000184979.9	-0.0218225	0.329671
ENSG00000184990.11	-2.86742e-05	0.992337
ENSG00000185038.13	-0.00155124	0.649033
ENSG00000185133.12	0.00626539	0.877969
ENSG00000185187.11	-0.00111822	0.552551
ENSG00000185324.20	0.00288709	0.4078
ENSG00000185340.14	0.00818861	0.321137
ENSG00000185507.18	0.00307802	0.286087
ENSG00000185519.8	0.0629301	0.195047
ENSG00000185567.6	-0.00197036	0.579617
ENSG00000185614.4	-0.0139946	0.850483
ENSG00000185615.14	-0.0142852	0.216653
ENSG00000185633.9	0.00317007	0.120223
ENSG00000185838.12	0.0199898	0.317854
ENSG00000185864.15	0.0591865	0.59094
ENSG00000185896.10	-0.000514089	0.22797
ENSG00000185915.5	-0.120965	0.154575
ENSG00000186153.15	-0.00574805	0.674308
ENSG00000186187.10	-0.00080202	0.908701
ENSG00000186193.8	0.0445319	0.0153233
ENSG00000186364.10	0.0805179	0.206604
ENSG00000186471.11	-0.0360942	0.952084
ENSG00000186625.12	0.0528962	0.0787613
ENSG00000186897.4	0.0508248	0.310892
ENSG00000186951.15	-0.0017788	0.296429
ENSG00000187024.12	-2.03567	0.249859
ENSG00000187091.12	-0.0179373	0.359783
ENSG00000187325.4	0.00286273	0.793699
ENSG00000187479.5	-0.00122991	0.617973
ENSG00000187583.9	0.0472351	0.372994
ENSG00000187595.13	-0.0496479	0.251866
ENSG00000187634.9	-0.0336141	0.320238
ENSG00000187642.8	0.140177	0.0648355
ENSG00000187682.1	-0.84935	0.381139
ENSG00000187838.15	0.0390554	0.949683
ENSG00000187848.11	0.0025066	0.860738
ENSG00000187959.8	0.445091	0.224627
ENSG00000187980.6	1.89597	0.0879779
ENSG00000188002.9	0.0446183	0.0290047
ENSG00000188056.10	0.296603	0.174062
ENSG00000188070.9	0.000199084	0.984507
ENSG00000188092.13	0.0168233	0.66624
ENSG00000188163.7	-0.197262	0.325019
ENSG00000188186.9	8.70233e-05	0.956588
ENSG00000188229.5	0.000687342	0.374177
ENSG00000188396.3	-0.161984	0.448086
ENSG00000188452.12	-0.0233464	0.477646
ENSG00000188486.3	0.0073066	0.0496433
ENSG00000188505.4	0.0145579	0.256151
ENSG00000188525.3	-0.161809	0.335186
ENSG00000188613.6	0.0261507	0.45882
ENSG00000188779.9	-0.568678	0.185581
ENSG00000188786.9	0.0449199	0.0181484
ENSG00000188976.9	0.00687111	0.0154142
ENSG00000189046.9	0.00832927	0.100038
ENSG00000189077.9	-0.000619147	0.745413
ENSG00000189269.11	0.0518845	0.919251
ENSG00000189350.11	0.0182349	0.735607
ENSG00000189409.11	-2.08075	0.0150763
ENSG00000196110.6	-0.0946191	0.649701
ENSG00000196123.11	0.0342066	0.145266
ENSG00000196169.13	-0.400002	0.107577
ENSG00000196187.10	-0.00050396	0.827032
ENSG00000196296.12	-0.063547	0.562038
ENSG00000196305.16	0.00886752	0.00819237
ENSG00000196396.8	0.0099739	0.183966
ENSG00000196405.11	-0.00645506	0.0524209
ENSG00000196436.8	-0.0189974	0.412285
ENSG00000196455.6	-0.00335462	0.686483
ENSG00000196497.14	0.0233411	0.175262
ENSG00000196511.12	-0.00449977	0.926289
ENSG00000196517.10	-0.0040477	0.713597
ENSG00000196557.9	0.000121284	0.921228
ENSG00000196562.13	-1.13701e-07	0.999937
ENSG00000196588.13	0.0104872	0.261357
ENSG00000196696.11	-0.0126787	0.714723
ENSG00000196700.6	0.00686303	0.0891606
ENSG00000196878.11	0.00119874	0.495095
ENSG00000196950.12	0.0141274	0.256601
ENSG00000196976.6	0.00432031	0.296032
ENSG00000197226.11	-0.00100799	0.616838
ENSG00000197586.11	0.00209617	0.465911
ENSG00000197614.9	-0.263825	0.127636
ENSG00000197629.5	-0.0122782	0.0447068
ENSG00000197746.12	-0.000156524	0.457632
ENSG00000197785.12	0.013414	0.0482507
ENSG00000197885.9	0.0159955	0.346508
ENSG00000197893.12	-0.0134258	0.540932
ENSG00000197956.8	1.06806e-05	0.983748
ENSG00000197982.13	-0.00192348	0.696539
ENSG00000197989.12	0.0483165	0.0122342
ENSG00000197993.6	-0.00767419	0.177004
ENSG00000198026.7	0.034696	0.0379695
ENSG00000198033.10	0.00618061	0.445587
ENSG00000198089.13	0.00581242	0.446341
ENSG00000198208.10	-0.00115481	0.956811
ENSG00000198231.11	0.00909498	0.0283462
ENSG00000198252.10	-0.0130456	0.158753
ENSG00000198467.12	-0.000410734	0.709515
ENSG00000198517.8	0.000683447	0.88231
ENSG00000198643.5	-0.0559948	0.471967
ENSG00000198646.12	0.00911027	0.169337
ENSG00000198720.11	0.0418826	0.0756499
ENSG00000198832.9	0.000209903	0.869646
ENSG00000198853.10	-0.00251729	0.720999
ENSG00000198931.9	0.000483786	0.548759
ENSG00000198937.8	-0.00240067	0.592431
ENSG00000198944.5	0.00105557	0.873188
ENSG00000198951.10	0.0025906	0.35061
ENSG00000202343.1	-0.659673	0.469618
ENSG00000202533.1	-0.412156	0.729498
ENSG00000203667.8	-0.0308798	0.145432
ENSG00000203734.10	0.489013	0.630439
ENSG00000203772.7	-0.00211546	0.896379
ENSG00000203804.4	-0.186551	0.67553
ENSG00000204084.11	-0.00290952	0.894213
ENSG00000204165.5	-0.9592	0.053248
ENSG00000204172.10	0.090988	0.0556507
ENSG00000204396.9	0.0153904	0.504159
ENSG00000204420.7	-0.869464	0.243133
ENSG00000204475.8	-0.415333	0.0367024
ENSG00000204482.9	-0.00495894	0.712296
ENSG00000204560.8	0.00258311	0.577091
ENSG00000204564.10	-0.000968741	0.90463
ENSG00000204618.7	-0.121611	0.241613
ENSG00000204619.6	-0.00146165	0.630909
ENSG00000204644.8	0.0454244	0.678102
ENSG00000204710.2	0.00246448	0.446316
ENSG00000204791.7	-0.0474092	0.640296
ENSG00000205090.7	0.504339	0.020786
ENSG00000205643.9	0.0231967	0.200308
ENSG00000205702.9	0.000831772	0.801303
ENSG00000205744.8	-0.0257785	0.022408
ENSG00000206384.9	-0.772222	0.0568279
ENSG00000206530.7	0.0588125	0.0197287
ENSG00000206561.11	-0.0719769	0.24595
ENSG00000206567.8	0.26349	0.00121842
ENSG00000207721.1	-0.571062	0.698311
ENSG00000210195.2	-0.0272776	0.89033
ENSG00000210196.2	0.00133289	0.550095
ENSG00000211445.10	-3.64829e-05	0.627931
ENSG00000211450.8	0.00211566	0.397905
ENSG00000211584.12	0.00399967	0.482124
ENSG00000213071.9	-0.0411981	0.145538
ENSG00000213373.6	-0.0299567	0.308497
ENSG00000213590.2	0.683812	0.149452
ENSG00000213694.3	-0.0105235	0.0829256
ENSG00000213722.7	0.00362109	0.0555278
ENSG00000213937.3	0.0412103	0.0792796
ENSG00000214142.2	0.708994	0.320014
ENSG00000214595.10	0.0753708	0.0150802
ENSG00000214655.9	0.00351363	0.409172
ENSG00000214706.9	0.00470974	0.217588
ENSG00000214765.7	0.0168702	0.529794
ENSG00000214860.4	0.286424	0.134935
ENSG00000214867.3	0.168171	0.823108
ENSG00000215187.8	-0.0541199	0.587482
ENSG00000215458.7	0.19515	0.436428
ENSG00000215859.7	0.152804	0.576768
ENSG00000215914.4	0.0906493	0.767026
ENSG00000217442.3	0.0258207	0.830068
ENSG00000218537.1	0.0873173	0.290656
ENSG00000220848.4	-0.130113	0.510371
ENSG00000221539.1	0.882242	0.0911842
ENSG00000221821.3	-0.0123659	0.614292
ENSG00000221869.4	0.00032772	0.670159
ENSG00000223403.3	0.0344248	0.465075
ENSG00000223572.8	0.0486096	0.63668
ENSG00000223705.8	0.0169918	0.371619
ENSG00000223764.2	-0.0464794	0.603214
ENSG00000223802.6	-0.00579765	0.878549
ENSG00000224016.2	-0.0542671	0.964146
ENSG00000224066.1	0.0878677	0.936388
ENSG00000224712.9	0.437694	0.156536
ENSG00000224976.2	-0.556405	0.234097
ENSG00000225031.1	0.0577417	0.348342
ENSG00000225526.4	-0.0510148	0.695696
ENSG00000225531.1	3.29849	0.0100898
ENSG00000225532.1	0.0497773	0.720285
ENSG00000225840.2	-0.00246703	0.825596
ENSG00000225872.2	0.330611	0.159671
ENSG00000225889.6	0.0861215	0.19885
ENSG00000225969.1	0.108091	0.607599
ENSG00000226054.2	-0.257912	0.314952
ENSG00000226055.2	-1.16545	0.382659
ENSG00000226686.6	-0.0400526	0.770438
ENSG00000226950.5	0.00471597	0.145917
ENSG00000227039.5	-0.0658284	0.39977
ENSG00000227066.1	0.0610639	0.000755469
ENSG00000227070.1	-0.258757	0.439393
ENSG00000227218.6	-0.00661202	0.91312
ENSG00000227473.1	-0.0242124	0.936275
ENSG00000227632.2	0.581412	0.371703
ENSG00000227741.1	-0.359482	0.674056
ENSG00000227742.1	-1.09486	0.310469
ENSG00000227802.1	0.125413	0.00217187
ENSG00000228071.4	0.164888	0.687263
ENSG00000228133.2	-0.030966	0.658294
ENSG00000228278.3	-1.90751e-06	0.986145
ENSG00000228347.1	0.869333	0.111207
ENSG00000228474.4	-0.000844065	0.650727
ENSG00000228727.7	0.496318	0.00835908
ENSG00000228888.1	-0.67451	0.131631
ENSG00000229122.1	-0.233062	0.699063
ENSG00000229939.1	0.142688	0.734047
ENSG00000229980.4	0.0890769	0.142345
ENSG00000230262.5	-0.595628	0.538616
ENSG00000230328.2	-0.00307395	0.892059
ENSG00000230929.5	0.164359	0.889472
ENSG00000231177.4	0.22877	0.57968
ENSG00000231672.5	-0.166921	0.423675
ENSG00000231720.1	-0.0824855	0.613277
ENSG00000231760.4	0.349831	0.0460866
ENSG00000231852.5	-0.01062	0.283774
ENSG00000232218.1	0.889437	0.578596
ENSG00000232677.5	0.0120859	0.159061
ENSG00000233101.9	-0.431469	0.242278
ENSG00000233330.1	-0.746661	0.291224
ENSG00000233337.1	0.808524	0.389229
ENSG00000233622.1	0.0203046	0.316419
ENSG00000233885.6	0.867672	0.0721716
ENSG00000233947.1	1.11521	0.0892099
ENSG00000234160.1	-0.131088	0.212947
ENSG00000234290.2	-0.154666	0.262607
ENSG00000234354.3	0.434644	0.0140841
ENSG00000234409.6	-1.53229	0.0263871
ENSG00000234769.7	0.0662763	0.635235
ENSG00000234776.3	0.290278	0.797119
ENSG00000235077.1	0.0749253	0.637675
ENSG00000235173.5	0.00105222	0.64003
ENSG00000235194.7	0.0156204	0.414423
ENSG00000235663.1	-0.0345146	0.966455
ENSG00000235821.1	0.475873	0.0756085
ENSG00000235961.5	-0.00201366	0.699296
ENSG00000236397.3	0.166608	0.170495
ENSG00000236675.1	0.153855	0.00269231
ENSG00000236830.5	0.155814	0.078896
ENSG00000237101.1	1.31592	0.016137
ENSG00000237172.3	0.002614	0.92647
ENSG00000237190.3	0.00930458	0.00682532
ENSG00000237214.3	0.144751	0.0666765
ENSG00000237264.4	0.1102	0.569804
ENSG00000237517.7	-0.00305018	0.631069
ENSG00000237807.3	-0.0745652	0.298483
ENSG00000238178.5	-0.00296675	0.918268
ENSG00000238279.1	-0.290622	0.715234
ENSG00000239264.7	0.0170471	0.35259
ENSG00000239486.1	1.32363	0.0557527
ENSG00000239779.5	0.00770969	0.765535
ENSG00000239969.4	0.377509	0.141505
ENSG00000240288.6	0.627263	0.0272377
ENSG00000240710.1	-1.19549	0.304848
ENSG00000240915.2	-0.0223647	0.892995
ENSG00000240972.1	-0.000450201	0.868424
ENSG00000241878.8	-0.00736585	0.501177
ENSG00000242252.1	0.0808408	0.55335
ENSG00000242852.5	1.09937	0.0950396
ENSG00000242952.1	2.129	0.129259
ENSG00000243708.7	0.679495	0.132246
ENSG00000243716.9	0.223422	0.0301658
ENSG00000243960.1	0.732503	0.437939
ENSG00000244038.8	0.00138605	0.273057
ENSG00000244165.1	0.00169444	0.960599
ENSG00000244383.1	-2.693	0.0883077
ENSG00000244607.4	-0.00282794	0.669133
ENSG00000244953.1	-0.61118	0.344877
ENSG00000245317.2	0.0200322	0.894553
ENSG00000245910.7	0.000517128	0.602331
ENSG00000246548.3	-0.493789	0.430101
ENSG00000246596.5	0.479468	0.117627
ENSG00000247679.2	-0.0554248	0.65006
ENSG00000248126.1	1.49981	0.0825097
ENSG00000248309.4	0.296507	0.64119
ENSG00000248375.1	0.807643	0.403641
ENSG00000248431.1	-0.0201795	0.550412
ENSG00000248559.1	0.770705	0.311624
ENSG00000248705.1	0.539562	0.280609
ENSG00000248712.6	-0.30627	0.105504
ENSG00000249258.2	-1.24879	0.229456
ENSG00000249635.1	1.08306	0.394375
ENSG00000249751.3	-0.0244143	0.568851
ENSG00000250979.1	0.773131	0.243493
ENSG00000251179.1	0.0819242	0.373273
ENSG00000251669.4	0.0966102	0.128489
ENSG00000253304.1	0.00244637	0.857353
ENSG00000253641.4	-0.0150219	0.889383
ENSG00000253649.2	-0.164476	0.16476
ENSG00000253755.1	-0.00350172	0.346751
ENSG00000254338.1	0.0261395	0.062014
ENSG00000254521.5	0.0322612	0.632454
ENSG00000254536.1	-0.745377	0.565305
ENSG00000254605.1	0.185864	0.129437
ENSG00000254802.1	-0.794251	0.283156
ENSG00000254814.1	-0.206943	0.612431
ENSG00000254978.2	1.98478	0.0039854
ENSG00000255191.1	-0.132354	0.280115
ENSG00000255200.1	0.120498	0.343814
ENSG00000255282.5	0.477068	0.134015
ENSG00000255366.1	-0.0337368	0.919881
ENSG00000255478.1	0.321697	0.742821
ENSG00000255769.6	0.173907	0.00112749
ENSG00000255823.2	0.0667636	0.170412
ENSG00000255864.4	-0.263176	0.698122
ENSG00000255967.1	2.84921	0.045569
ENSG00000256028.2	1.46695	0.00343514
ENSG00000256210.3	-0.0819668	0.893802
ENSG00000256269.5	0.00434864	0.588126
ENSG00000257283.1	-0.33498	0.823458
ENSG00000257337.5	-0.00980425	0.614743
ENSG00000257390.4	0.425973	0.655121
ENSG00000257727.4	0.00478339	0.150719
ENSG00000257740.1	1.21435	0.0229373
ENSG00000257989.1	-0.398722	0.464391
ENSG00000258301.3	0.0245594	0.851222
ENSG00000258315.4	-0.0781699	0.620506
ENSG00000258405.8	-0.378263	0.285068
ENSG00000258427.3	1.51665	0.0499296
ENSG00000258538.4	-1.9283	0.0705435
ENSG00000258539.1	0.214186	0.802141
ENSG00000258727.1	-0.030055	0.60102
ENSG00000258819.1	0.00482445	0.945896
ENSG00000258890.5	0.0311027	0.00581016
ENSG00000259040.4	0.127663	0.302813
ENSG00000259399.1	-0.0364802	0.97661
ENSG00000259519.1	0.538284	0.48559
ENSG00000259605.3	0.0089161	0.798567
ENSG00000259762.1	0.869428	0.0769573
ENSG00000259803.5	-0.00489184	0.084131
ENSG00000259807.1	-0.175784	0.707264
ENSG00000259895.1	0.278407	0.724789
ENSG00000259933.5	-0.0780393	0.6183
ENSG00000259970.1	0.523107	0.376543
ENSG00000260001.5	-0.0447992	0.166774
ENSG00000260027.4	-0.0195691	0.592867
ENSG00000260105.5	-0.0106964	0.228983
ENSG00000260190.1	0.240005	0.574399
ENSG00000260201.2	0.0752828	0.827932
ENSG00000260238.4	0.137333	0.0508272
ENSG00000260500.1	-0.395769	0.0692331
ENSG00000260517.2	-0.0541443	0.742413
ENSG00000260605.1	0.143881	0.432754
ENSG00000260645.1	-0.276498	0.495554
ENSG00000260762.1	-0.0989764	0.194994
ENSG00000261123.1	-0.0726518	0.637481
ENSG00000261295.1	0.0889208	0.256403
ENSG00000261456.4	1.02623	0.0412591
ENSG00000261637.1	-0.0162263	0.967612
ENSG00000261659.2	0.491132	0.238743
ENSG00000261668.1	0.0430082	0.904363
ENSG00000261707.1	0.209932	0.136246
ENSG00000261884.2	0.00282935	0.979698
ENSG00000261924.1	0.19392	0.7992
ENSG00000262006.1	0.0518069	0.514992
ENSG00000262052.1	-0.271189	0.82372
ENSG00000262877.4	-0.0016759	0.935935
ENSG00000262943.6	-0.03959	0.454492
ENSG00000263011.1	0.790373	0.244763
ENSG00000263050.1	-0.228587	0.573931
ENSG00000263214.1	0.0988258	0.666494
ENSG00000263316.1	-0.962877	0.086974
ENSG00000263429.3	0.0377793	0.291935
ENSG00000263946.1	0.554771	0.0265313
ENSG00000264215.1	-0.0410521	0.915558
ENSG00000264696.1	-0.00540036	0.930452
ENSG00000265912.1	3.30431	7.01393e-05
ENSG00000266289.1	-0.0388528	0.96522
ENSG00000266402.3	0.0659091	0.10858
ENSG00000266973.1	-0.169456	0.759731
ENSG00000267053.5	-0.123506	0.790104
ENSG00000267074.1	-2.31019	0.00434421
ENSG00000267363.1	-0.723932	0.538983
ENSG00000267369.1	-0.682729	0.00215269
ENSG00000267383.5	0.728393	0.0505387
ENSG00000267405.1	-0.00311575	0.927961
ENSG00000267480.1	0.12392	0.476483
ENSG00000267484.1	1.61095	0.174208
ENSG00000267505.1	-0.00594891	0.831978
ENSG00000267510.1	0.361914	0.438182
ENSG00000267605.4	-1.04203	0.215729
ENSG00000267724.1	-2.89135	0.0218005
ENSG00000267748.4	0.393098	0.0522097
ENSG00000268104.2	0.00272629	0.890996
ENSG00000268288.1	-1.2781	0.452876
ENSG00000268575.1	0.0453331	0.80124
ENSG00000268883.2	0.0732558	0.427916
ENSG00000268903.1	0.126453	0.143247
ENSG00000268938.2	0.506524	0.402097
ENSG00000268970.1	0.0779251	0.78063
ENSG00000269072.1	1.21661	0.0333401
ENSG00000269514.1	-0.794429	0.278199
ENSG00000269656.1	0.436271	0.694367
ENSG00000269858.4	0.000881407	0.807784
ENSG00000269893.5	0.00142024	0.607592
ENSG00000269982.1	0.0497343	0.668777
ENSG00000270510.1	0.0251642	0.985337
ENSG00000270882.2	0.142914	0.375158
ENSG00000270885.1	0.000556238	0.834992
ENSG00000271553.1	0.18762	0.39801
ENSG00000271787.1	1.02917	0.315973
ENSG00000271913.4	-0.0980874	0.824519
ENSG00000272006.1	1.89691	0.00411347
ENSG00000272034.1	0.682791	0.00727886
ENSG00000272087.1	-0.209615	0.393849
ENSG00000272112.1	-0.0821344	0.409931
ENSG00000272148.1	-1.0406	0.424734
ENSG00000272203.1	1.22759	0.258592
ENSG00000272223.1	0.552597	0.177925
ENSG00000272333.4	3.94384e-05	0.984283
ENSG00000272391.4	0.00354014	0.732871
ENSG00000272645.2	0.00337942	0.908638
ENSG00000272689.1	0.0908229	0.807423
ENSG00000272791.1	0.833481	0.00647469
ENSG00000272821.1	0.111258	0.000191664
ENSG00000272829.1	-0.0591123	0.744806
ENSG00000273027.1	-0.0915679	0.739836
ENSG00000273226.1	-0.0278468	0.87507
ENSG00000273265.1	0.408993	0.199372
ENSG00000273311.1	0.0447847	0.0802449
ENSG00000273350.1	-0.000285351	0.998403
ENSG00000274363.1	0.982464	0.278269
ENSG00000274736.3	-0.559445	0.104055
ENSG00000275793.1	0.0808377	0.913531
ENSG00000276742.1	0.832464	0.103602
ENSG00000276772.1	0.28227	0.239869
ENSG00000277877.3	0.107216	0.680116
ENSG00000278075.1	0.438384	0.287051
ENSG00000278464.1	0.186035	0.0697435
ENSG00000278603.1	1.18066	0.245771
ENSG00000278690.1	0.0316022	0.910496
ENSG00000278932.2	0.476443	0.0979801
ENSG00000278978.1	0.30025	0.0167074
ENSG00000279117.1	0.0259782	0.0400009
ENSG00000279208.1	0.755564	0.0887066
ENSG00000279332.1	-0.000741149	0.930977
ENSG00000279428.1	-0.0158823	0.479974
ENSG00000279464.1	0.14232	0.723946
ENSG00000279774.1	-0.0600642	0.701585
ENSG00000279792.1	0.743078	0.394426
ENSG00000280169.1	-0.103478	0.867635
ENSG00000280212.1	0.369	0.428416
ENSG00000280213.1	0.31136	0.277446
ENSG00000280311.1	0.43246	0.613299
ENSG00000280328.1	0.426317	0.224426
ENSG00000281538.1	-0.0763481	0.721519
ENSG00000281691.1	-0.746621	0.527755

## Sheet: CG.DFI.LUAD
Gene	Coefficient	Logrank p-value
ENSG00000002330.12	-0.00430715	0.428585
ENSG00000004487.14	6.55877e-06	0.998348
ENSG00000004534.13	0.000192119	0.950217
ENSG00000004777.17	-0.00349824	0.703456
ENSG00000004864.12	-0.00674612	0.253873
ENSG00000004975.10	-0.00223815	0.774702
ENSG00000005007.11	-0.000517158	0.809952
ENSG00000005059.14	0.0128939	0.0295355
ENSG00000006007.10	-0.000127408	0.934477
ENSG00000006047.11	-0.000180101	0.986635
ENSG00000006282.18	-0.000901693	0.731006
ENSG00000006283.16	-0.0367128	0.443412
ENSG00000008056.11	0.021593	0.58642
ENSG00000008083.12	0.00805843	0.339088
ENSG00000008118.8	-0.130262	0.418718
ENSG00000008256.14	0.000468471	0.55982
ENSG00000008323.14	0.00853414	0.228611
ENSG00000008438.4	-0.168809	0.602011
ENSG00000008441.15	-0.00475423	0.0168218
ENSG00000009724.15	-0.0157988	0.875872
ENSG00000010327.9	-0.00299452	0.189037
ENSG00000011009.9	-0.00126875	0.588655
ENSG00000011143.15	-0.00644774	0.688247
ENSG00000011304.15	0.000521412	0.689605
ENSG00000012211.11	0.0158601	0.0184569
ENSG00000013306.14	-0.000478239	0.651469
ENSG00000015532.8	0.00665418	0.171815
ENSG00000016402.11	-0.00324192	0.739502
ENSG00000016864.15	0.0022762	0.797008
ENSG00000019102.10	0.00040961	0.80697
ENSG00000019144.15	-0.00128816	0.722855
ENSG00000025708.11	0.000573415	0.560937
ENSG00000029639.9	0.01611	0.466182
ENSG00000030582.15	-0.000219355	0.518408
ENSG00000033100.13	0.00024319	0.906729
ENSG00000035681.6	0.00179337	0.764124
ENSG00000035720.6	-0.109539	0.105081
ENSG00000037042.8	-0.0102129	0.364981
ENSG00000042062.10	0.113043	0.00221929
ENSG00000047579.18	-0.0187279	0.278087
ENSG00000047849.20	-0.00028269	0.802701
ENSG00000048462.9	-0.0326462	0.223255
ENSG00000050426.14	-0.00593583	0.244083
ENSG00000050820.15	0.00140439	0.554821
ENSG00000052344.14	0.00101601	0.0833148
ENSG00000054983.15	0.0031235	0.404598
ENSG00000055211.11	0.00254375	0.620892
ENSG00000059691.10	-0.00917291	0.375775
ENSG00000059915.15	-0.05942	0.083806
ENSG00000061273.16	-0.000983083	0.710583
ENSG00000062096.13	1.66351	0.0908655
ENSG00000062282.13	-0.0123317	0.20983
ENSG00000062524.14	0.000585467	0.927436
ENSG00000064012.20	0.0053975	0.340241
ENSG00000064309.13	-0.0151654	0.234025
ENSG00000064601.15	0.00019576	0.751196
ENSG00000064932.14	0.00326107	0.0465611
ENSG00000065320.7	-0.0108162	0.120394
ENSG00000065923.8	0.00353076	0.37142
ENSG00000067182.6	0.00107657	0.392811
ENSG00000067704.9	-0.000602018	0.726357
ENSG00000067829.17	-0.00522716	0.209116
ENSG00000068137.13	-0.00924439	0.185344
ENSG00000068305.16	-0.00728988	0.27593
ENSG00000068383.17	-0.0194769	0.130264
ENSG00000068615.15	-0.0315094	0.267106
ENSG00000069424.13	-0.0089531	0.0893653
ENSG00000070047.10	0.00307795	0.556475
ENSG00000070985.12	-0.00594907	0.934497
ENSG00000071282.10	0.000228749	0.967873
ENSG00000072163.17	-0.0215671	0.0360606
ENSG00000072518.19	0.0014611	0.657923
ENSG00000072736.17	-0.0204528	0.0274968
ENSG00000072778.18	-0.000539429	0.487071
ENSG00000074276.9	0.00174398	0.424665
ENSG00000075975.14	0.0020797	0.878507
ENSG00000076067.10	-0.00430076	0.25821
ENSG00000076108.10	-0.000273712	0.877268
ENSG00000076344.14	-0.0320078	0.216407
ENSG00000076706.13	0.000455816	0.783155
ENSG00000077092.17	-0.00941318	0.669882
ENSG00000077097.12	0.000508095	0.832105
ENSG00000077150.16	-0.00284042	0.421523
ENSG00000078061.11	0.000101572	0.9759
ENSG00000078814.14	-0.00398206	0.931724
ENSG00000081181.6	-0.0171518	0.23156
ENSG00000082014.15	-0.00116832	0.79466
ENSG00000083812.10	-0.0588414	0.172336
ENSG00000084693.14	-0.00366723	0.551518
ENSG00000084754.9	-0.000975309	0.565197
ENSG00000086159.11	-0.0368587	0.398108
ENSG00000087087.17	-0.00229018	0.372391
ENSG00000087191.11	-0.000958397	0.681282
ENSG00000088038.16	-0.00179049	0.747217
ENSG00000089050.13	-0.000707168	0.912621
ENSG00000089163.4	-0.152728	0.246212
ENSG00000089486.15	-0.0090947	0.157008
ENSG00000089820.14	-0.00195838	0.561147
ENSG00000090097.19	-0.00153059	0.829445
ENSG00000090975.11	-0.000484654	0.946749
ENSG00000091622.14	0.00260446	0.763085
ENSG00000092010.13	0.000370367	0.725848
ENSG00000092051.15	-0.24421	0.0506957
ENSG00000092108.19	0.000915904	0.755922
ENSG00000092758.14	-0.00452199	0.763968
ENSG00000092820.16	0.000102249	0.693703
ENSG00000093144.17	-0.00224757	0.479239
ENSG00000096063.13	0.00485068	0.0546857
ENSG00000096384.18	-0.000144389	0.375453
ENSG00000099365.8	0.126175	0.0524149
ENSG00000099377.12	0.00181715	0.765378
ENSG00000099795.5	-0.000676489	0.799344
ENSG00000099797.10	-0.00155178	0.507307
ENSG00000099800.6	0.00130157	0.772601
ENSG00000099817.10	-0.00217611	0.367741
ENSG00000099821.12	-0.000499603	0.940142
ENSG00000099822.2	0.00666191	0.871452
ENSG00000099899.13	-0.000290676	0.955435
ENSG00000099904.14	-0.00265032	0.652637
ENSG00000099956.16	0.00208401	0.541816
ENSG00000099957.15	-0.190208	0.21142
ENSG00000099958.13	-0.00254563	0.34615
ENSG00000099960.11	0.014466	0.292908
ENSG00000100078.3	-0.00814163	0.465837
ENSG00000100079.6	-0.00720931	0.812602
ENSG00000100139.12	-0.00098123	0.847618
ENSG00000100196.9	0.00272979	0.295875
ENSG00000100201.17	9.28805e-05	0.881223
ENSG00000100220.10	-0.00205879	0.575243
ENSG00000100239.14	-0.00491262	0.307022
ENSG00000100241.19	-0.00128595	0.470348
ENSG00000100276.9	-0.0445487	0.78948
ENSG00000100359.19	0.000994165	0.714655
ENSG00000100417.10	-0.00189937	0.424147
ENSG00000100433.14	0.0161056	0.692216
ENSG00000100522.7	0.00212999	0.61892
ENSG00000100767.14	-0.00705848	0.189624
ENSG00000100908.12	-0.0117818	0.428374
ENSG00000100918.11	-0.00298686	0.393689
ENSG00000100979.13	-0.001163	0.146282
ENSG00000100982.10	-0.00385893	0.518221
ENSG00000100991.10	0.00322007	0.268089
ENSG00000101003.9	0.0013598	0.835321
ENSG00000101004.13	-0.00263304	0.718571
ENSG00000101082.12	0.0220766	0.474767
ENSG00000101084.15	0.00488589	0.295025
ENSG00000101158.11	-0.00266361	0.266548
ENSG00000101160.12	-0.00054939	0.278697
ENSG00000101190.11	-0.0200805	0.255338
ENSG00000101220.16	-0.00621814	0.373445
ENSG00000101298.12	0.0265411	0.250029
ENSG00000101343.13	8.27235e-05	0.991013
ENSG00000101384.10	0.00147581	0.377777
ENSG00000101460.11	0.00662531	0.374248
ENSG00000101464.9	0.00203331	0.767103
ENSG00000101882.8	0.000684434	0.962992
ENSG00000102007.9	0.00180884	0.110542
ENSG00000102109.8	0.00320301	0.512929
ENSG00000102144.12	0.000290799	0.125908
ENSG00000102302.7	-0.00126646	0.912746
ENSG00000102362.14	0.0148669	0.0456231
ENSG00000102710.18	0.0142466	0.0201231
ENSG00000102854.13	-2.41071e-05	0.828283
ENSG00000102978.11	-0.00258452	0.248128
ENSG00000102984.13	-0.0801363	0.245799
ENSG00000103024.6	-0.00158151	0.690807
ENSG00000103044.9	-0.00279718	0.181284
ENSG00000103067.10	-0.00223235	0.33385
ENSG00000103111.13	-0.0102838	0.0619644
ENSG00000103126.13	0.00293342	0.530047
ENSG00000103264.14	-0.013266	0.216164
ENSG00000103351.11	-0.00605057	0.596534
ENSG00000103415.10	0.00405984	0.300233
ENSG00000103426.11	0.0477528	0.980921
ENSG00000103479.13	-0.00278525	0.376613
ENSG00000103510.18	-0.00744044	0.274297
ENSG00000104341.15	-0.000173833	0.695275
ENSG00000104524.12	-0.00187655	0.749505
ENSG00000104660.16	0.00508611	0.357782
ENSG00000104679.9	0.00230656	0.810508
ENSG00000104859.13	0.00381153	0.446241
ENSG00000104903.4	-0.0448952	0.156648
ENSG00000104936.16	0.00624843	0.27517
ENSG00000104964.13	-0.000213085	0.782306
ENSG00000105135.14	0.00152379	0.534795
ENSG00000105137.11	0.00130161	0.924352
ENSG00000105258.7	-0.000889725	0.904041
ENSG00000105261.6	0.916472	0.0439981
ENSG00000105325.12	0.00561046	0.373389
ENSG00000105355.7	0.00371189	0.0372173
ENSG00000105364.12	0.000480584	0.916634
ENSG00000105373.17	-0.000868895	0.359418
ENSG00000105556.9	0.000428754	0.972121
ENSG00000105617.3	-0.0566961	0.117041
ENSG00000105655.17	-0.00293133	0.277395
ENSG00000105656.11	-0.00322439	0.80801
ENSG00000105662.14	-0.00475186	0.622402
ENSG00000105664.9	-0.00048982	0.722341
ENSG00000105701.14	-0.00049403	0.631184
ENSG00000105708.8	-0.0489043	0.118942
ENSG00000105856.12	-0.00208228	0.622055
ENSG00000105877.16	-0.00231391	0.367036
ENSG00000105996.6	-0.0547543	0.556191
ENSG00000106077.17	-0.00183199	0.554328
ENSG00000106123.10	-0.00121119	0.830762
ENSG00000106346.10	0.0175803	0.221937
ENSG00000106367.12	0.0010454	0.728788
ENSG00000106484.13	-0.000585242	0.773489
ENSG00000106624.7	-4.86797e-05	0.848926
ENSG00000106628.9	-0.000933651	0.666622
ENSG00000106948.15	-0.00217326	0.555872
ENSG00000106991.12	-0.00251572	0.0698949
ENSG00000107159.11	0.00149694	0.313303
ENSG00000107201.8	0.0105838	0.00388451
ENSG00000107404.16	-0.0013893	0.53319
ENSG00000107581.11	-0.00100303	0.344492
ENSG00000107672.13	-0.0223879	0.0468435
ENSG00000107736.18	0.0104859	0.546825
ENSG00000107829.12	-0.00489871	0.202221
ENSG00000107859.8	0.691791	0.561494
ENSG00000107872.11	-0.0151783	0.2795
ENSG00000107874.9	-0.00267435	0.658419
ENSG00000107902.12	-0.00675349	0.259531
ENSG00000108262.14	0.00193753	0.482662
ENSG00000108309.11	-0.0291135	0.287421
ENSG00000108556.7	0.0904116	0.218786
ENSG00000108591.8	-0.00346296	0.715624
ENSG00000108592.15	-0.00081054	0.850854
ENSG00000108602.16	-0.000129273	0.609005
ENSG00000108604.14	0.00218028	0.376887
ENSG00000108788.10	-0.000451637	0.898099
ENSG00000108797.10	-0.0185679	0.318749
ENSG00000108799.11	-0.0172684	0.0848799
ENSG00000108840.14	-0.00455763	0.247267
ENSG00000108846.14	-0.000159941	0.754994
ENSG00000108854.14	0.00315334	0.171605
ENSG00000108924.12	-0.0105182	0.0485075
ENSG00000108963.16	-0.024129	0.135426
ENSG00000109519.11	-0.00493511	0.465829
ENSG00000109686.15	0.000344694	0.919863
ENSG00000109956.11	0.00147079	0.897421
ENSG00000110042.6	-0.000738336	0.676796
ENSG00000110395.4	0.00290387	0.593162
ENSG00000110697.11	-0.00216089	0.468218
ENSG00000110700.5	-0.000198258	0.665495
ENSG00000110711.8	-0.00409516	0.262779
ENSG00000110925.5	0.00747555	0.183173
ENSG00000111077.16	-0.00556584	0.0226171
ENSG00000111087.8	-0.063321	0.264006
ENSG00000111276.9	-0.000845996	0.847649
ENSG00000111344.10	0.00712913	0.00235413
ENSG00000111445.12	-0.00682584	0.509659
ENSG00000111669.13	0.0004486	0.174869
ENSG00000111671.8	-0.00817973	0.134551
ENSG00000112137.15	-0.0142879	0.0903357
ENSG00000112511.16	-0.00370065	0.441127
ENSG00000112514.14	-0.000697498	0.741271
ENSG00000113716.11	-0.00444753	0.468558
ENSG00000113758.12	0.00171261	0.285409
ENSG00000113763.9	0.0437051	0.0452662
ENSG00000114354.11	0.00361582	0.0592016
ENSG00000115053.14	0.000204679	0.65608
ENSG00000115155.15	-0.0589368	0.647
ENSG00000115232.12	-0.00721296	0.2937
ENSG00000115275.10	0.00192063	0.523009
ENSG00000115297.10	-0.090033	0.536171
ENSG00000115310.16	-0.000200772	0.800627
ENSG00000115325.12	0.00415138	0.746131
ENSG00000115657.11	-0.00790272	0.499965
ENSG00000115841.18	-0.0128383	0.31595
ENSG00000116005.10	0.000654155	0.510097
ENSG00000116161.16	0.00174503	0.395817
ENSG00000116176.6	-0.449063	0.282055
ENSG00000116221.14	-0.00435941	0.269658
ENSG00000116254.16	-0.118461	0.391713
ENSG00000116329.9	-0.0363583	0.21124
ENSG00000116478.10	-0.00279945	0.214173
ENSG00000116957.11	-0.00228425	0.738688
ENSG00000117308.13	-0.000165199	0.920466
ENSG00000117411.15	-0.00357049	0.325219
ENSG00000117419.13	-0.0122719	0.0267978
ENSG00000118094.10	-0.017045	0.79096
ENSG00000118518.14	-0.00576329	0.616703
ENSG00000118873.14	0.00150497	0.752266
ENSG00000118997.12	-0.0085652	0.367425
ENSG00000119041.9	0.0115195	0.136785
ENSG00000119396.9	0.000945824	0.706122
ENSG00000119397.15	-0.00307522	0.715706
ENSG00000119408.15	0.00695554	0.00704446
ENSG00000119522.14	0.00438252	0.491741
ENSG00000119689.13	0.00126532	0.55967
ENSG00000119698.10	-0.0504263	0.280173
ENSG00000119915.4	-0.0352801	0.62925
ENSG00000119986.6	0.00142996	0.693424
ENSG00000120333.4	-0.000793601	0.940298
ENSG00000120699.11	0.000762236	0.93942
ENSG00000120784.14	-0.00372556	0.839019
ENSG00000120860.9	-0.0154433	0.305343
ENSG00000120948.14	0.000367652	0.938019
ENSG00000121053.5	-0.436207	0.349557
ENSG00000121075.8	-0.0341356	0.0176726
ENSG00000121653.10	-0.0154325	0.137755
ENSG00000122033.13	-0.00237612	0.793831
ENSG00000122034.11	-0.000462874	0.655911
ENSG00000122203.13	0.0023627	0.137495
ENSG00000122674.10	0.0179081	0.39707
ENSG00000122696.11	0.00851282	0.686117
ENSG00000122729.17	0.00111502	0.472229
ENSG00000122735.14	-0.00653035	0.568972
ENSG00000122971.7	-0.00553167	0.392081
ENSG00000123136.13	0.000115825	0.969886
ENSG00000123143.11	-0.00033137	0.831764
ENSG00000123146.18	-0.000483023	0.722089
ENSG00000123329.16	-0.00748294	0.450201
ENSG00000123342.14	-0.00611004	0.255979
ENSG00000123395.13	0.00432658	0.507721
ENSG00000123485.10	0.00809689	0.168773
ENSG00000123737.11	-0.00557586	0.643208
ENSG00000123870.10	0.0712592	0.389715
ENSG00000124151.17	0.00051508	0.835997
ENSG00000124541.6	-0.00202644	0.677857
ENSG00000124574.13	0.000322535	0.954612
ENSG00000124587.12	0.00144683	0.562596
ENSG00000124593.13	-0.0172368	0.08449
ENSG00000124713.5	-0.433759	0.0116105
ENSG00000124915.9	0.266661	0.0393858
ENSG00000124939.5	0.000576964	0.975267
ENSG00000125037.11	-0.00106352	0.778715
ENSG00000125148.6	-0.000485183	0.610952
ENSG00000125149.10	-0.0242606	0.182052
ENSG00000125170.9	-9.28669e-05	0.959138
ENSG00000125257.12	-0.00962992	0.015237
ENSG00000125355.14	0.0114383	0.625918
ENSG00000125520.12	-0.00239957	0.356011
ENSG00000125650.4	0.0430553	0.661578
ENSG00000125652.6	0.000211399	0.970186
ENSG00000125741.4	0.00113867	0.887617
ENSG00000125753.12	0.000774481	0.637292
ENSG00000125775.13	0.00213967	0.20892
ENSG00000126010.5	0.0661285	0.193656
ENSG00000126246.8	-0.000742917	0.988787
ENSG00000126247.9	0.00045261	0.426816
ENSG00000126464.12	-0.00272268	0.55907
ENSG00000126500.3	0.197825	0.0582819
ENSG00000126603.7	0.000295285	0.953626
ENSG00000126778.8	-0.00223449	0.508543
ENSG00000126895.12	-0.179434	0.239784
ENSG00000127311.8	0.010819	0.358013
ENSG00000127533.3	-0.00745953	0.712963
ENSG00000127564.15	0.00336245	0.730133
ENSG00000127585.10	-0.00709362	0.306175
ENSG00000127948.12	-0.00230415	0.10223
ENSG00000128016.5	-0.000395422	0.357101
ENSG00000128191.12	-0.000792373	0.929038
ENSG00000128283.6	-0.000417588	0.636564
ENSG00000128322.6	0.0300283	0.829274
ENSG00000128346.9	-0.126431	0.180431
ENSG00000128463.11	0.00171166	0.550654
ENSG00000128482.14	0.0662836	0.473125
ENSG00000128563.12	-0.00568956	0.456197
ENSG00000128564.6	-0.00542036	0.494279
ENSG00000128595.15	0.000332979	0.604802
ENSG00000128617.2	-0.0985548	0.298169
ENSG00000128709.11	0.0425518	0.339851
ENSG00000129103.16	-0.00039495	0.634644
ENSG00000129195.14	0.000512681	0.96517
ENSG00000129347.18	-0.00491175	0.519708
ENSG00000129451.10	0.00125249	0.208722
ENSG00000129691.14	0.00160408	0.737022
ENSG00000129744.2	0.184402	0.684159
ENSG00000129910.6	-0.0177072	0.280339
ENSG00000129951.17	-0.0473851	0.220711
ENSG00000129968.14	0.00578249	0.542225
ENSG00000130244.11	0.0102507	0.52707
ENSG00000130487.5	0.00127471	0.77749
ENSG00000130511.14	-0.00558937	0.320712
ENSG00000130545.14	0.00487957	0.47904
ENSG00000130584.9	-0.0231494	0.221283
ENSG00000130702.12	-0.000121079	0.831807
ENSG00000130706.11	-0.00213832	0.301535
ENSG00000130714.14	-0.00797366	0.364689
ENSG00000130717.11	-0.00573921	0.504814
ENSG00000130734.8	0.00470726	0.747883
ENSG00000130748.6	0.0221366	0.494369
ENSG00000130751.8	0.090175	0.260885
ENSG00000130758.6	0.00965433	0.436216
ENSG00000130811.9	-0.000220426	0.914657
ENSG00000130812.9	-0.203759	0.426119
ENSG00000130813.16	0.000205412	0.978398
ENSG00000130826.14	-0.000628008	0.831779
ENSG00000130827.6	0.00304382	0.138922
ENSG00000130830.13	-0.0030493	0.576574
ENSG00000130876.10	-0.00538049	0.669914
ENSG00000130881.12	0.00623666	0.250217
ENSG00000131149.16	-0.00361256	0.0500844
ENSG00000131153.7	-0.00388444	0.595233
ENSG00000131188.10	0.0311775	0.334669
ENSG00000131236.15	0.000203447	0.787998
ENSG00000131238.15	-0.00137287	0.183243
ENSG00000131389.15	0.000562341	0.751506
ENSG00000131470.13	-0.0038729	0.921691
ENSG00000131584.17	-0.00554682	0.179309
ENSG00000131650.12	0.0290064	0.573852
ENSG00000131788.14	0.00318521	0.395935
ENSG00000131899.9	0.00555469	0.124465
ENSG00000132153.13	-0.00186606	0.683819
ENSG00000132155.10	-0.00129215	0.758929
ENSG00000132313.13	0.00784274	0.286467
ENSG00000132388.11	0.00233256	0.714018
ENSG00000132507.16	-1.69529e-05	0.970148
ENSG00000132613.13	-0.0089471	0.204113
ENSG00000132622.9	-0.0312071	0.213787
ENSG00000132793.10	0.0102358	0.181043
ENSG00000133019.10	-0.0195831	0.347025
ENSG00000133055.7	0.000529043	0.949795
ENSG00000133318.12	-0.00114006	0.485339
ENSG00000133794.16	0.00343415	0.772246
ENSG00000133805.14	0.00435207	0.549506
ENSG00000133961.18	0.00650141	0.130076
ENSG00000134013.14	0.00263041	0.0258011
ENSG00000134317.16	0.00323418	0.448354
ENSG00000134318.12	0.0027908	0.211995
ENSG00000134398.11	0.00080912	0.607312
ENSG00000134480.12	0.00303933	0.745359
ENSG00000134668.11	0.00828799	0.0521858
ENSG00000134684.9	-0.00194555	0.392607
ENSG00000134697.11	-0.00889878	0.0602166
ENSG00000134769.20	0.0094867	0.0444843
ENSG00000134780.8	-0.0213811	0.192223
ENSG00000135093.11	-0.0256832	0.329617
ENSG00000135144.6	0.0227918	0.141591
ENSG00000135365.14	-9.43399e-05	0.991849
ENSG00000135414.8	0.0181845	0.0673408
ENSG00000135451.11	0.000841073	0.881103
ENSG00000135597.17	-0.00964845	0.261337
ENSG00000135678.10	0.000107899	0.741001
ENSG00000135749.17	0.0175941	0.0707677
ENSG00000135778.10	-0.0053799	0.328772
ENSG00000135945.8	-0.001524	0.865406
ENSG00000136048.12	-0.00146172	0.080911
ENSG00000136059.13	0.00110109	0.231082
ENSG00000136478.6	0.00258008	0.671461
ENSG00000136854.16	-0.00357857	0.079508
ENSG00000136877.13	-0.00273218	0.414516
ENSG00000136881.10	-0.0182523	0.206069
ENSG00000136930.11	0.000164026	0.951843
ENSG00000137070.16	-0.0193932	0.314671
ENSG00000137154.11	-3.70755e-05	0.647049
ENSG00000137200.11	-0.0065471	0.273592
ENSG00000137267.5	0.00595318	0.204855
ENSG00000137274.11	0.00203141	0.802818
ENSG00000137563.10	-0.00187903	0.388569
ENSG00000137575.10	0.00102533	0.299202
ENSG00000137825.9	0.00227605	0.591307
ENSG00000137841.10	-0.00765322	0.111945
ENSG00000137843.10	0.321366	0.224039
ENSG00000137877.9	-0.00932722	0.573222
ENSG00000138061.10	0.000720942	0.551768
ENSG00000138073.12	-0.00108152	0.744201
ENSG00000138100.12	0.00761413	0.564943
ENSG00000138193.13	-0.0018196	0.813358
ENSG00000138794.8	0.003809	0.585541
ENSG00000138834.11	-0.000785242	0.685915
ENSG00000139044.9	0.000617047	0.577771
ENSG00000139540.10	-0.00348163	0.818361
ENSG00000139645.9	-0.000953596	0.770557
ENSG00000139835.12	0.0209392	0.0917003
ENSG00000140093.8	-0.0471164	0.6
ENSG00000140104.12	-0.00521666	0.671228
ENSG00000140199.10	0.00589913	0.397687
ENSG00000140854.11	-0.0247271	0.0176742
ENSG00000140859.14	-0.0030738	0.277397
ENSG00000140876.10	-0.106762	0.0449125
ENSG00000140931.18	0.00371213	0.114164
ENSG00000140939.13	-0.00216554	0.567604
ENSG00000140990.13	-0.00141788	0.67379
ENSG00000141068.12	0.000910491	0.689454
ENSG00000141179.12	0.0030241	0.589965
ENSG00000141219.14	0.000283531	0.982084
ENSG00000141349.7	-0.0020108	0.525596
ENSG00000141401.10	-0.00177916	0.264483
ENSG00000141447.15	-0.00297791	0.474791
ENSG00000141503.14	-0.000955139	0.715825
ENSG00000141522.10	0.00105338	0.395305
ENSG00000141564.12	0.00193287	0.698599
ENSG00000141744.3	0.0564393	0.36008
ENSG00000141934.8	0.000471854	0.762408
ENSG00000142186.15	-0.000660274	0.769018
ENSG00000142197.11	0.00329799	0.321681
ENSG00000142208.14	0.00023754	0.901816
ENSG00000142632.15	-0.00746732	0.0907164
ENSG00000143125.5	-1.22892	0.452431
ENSG00000143157.10	-0.00139534	0.63276
ENSG00000143198.11	0.00281602	0.157592
ENSG00000143318.11	0.112209	0.710498
ENSG00000143340.6	0.126414	0.0334109
ENSG00000143382.12	0.00102787	0.384056
ENSG00000143442.20	0.000927844	0.686766
ENSG00000143494.14	0.0109692	0.467262
ENSG00000143552.8	0.0101563	0.633848
ENSG00000143553.9	0.00432059	0.316226
ENSG00000143621.15	0.00063125	0.40626
ENSG00000143748.16	-0.0082479	0.456676
ENSG00000143819.11	-0.00031906	0.123875
[truncated: 943 more rows]

## Sheet: CG.DFI.LUSC
Gene	Coefficient	Logrank p-value
[truncated: 1,449 more rows]

[truncated: 30 more sheets: CG.DFI.PRAD, CG.DFI.STAD, CG.DFI.THCA, CG.DFI.UCEC, CG.OS.BLCA, CG.OS.BRCA, CG.OS.COAD, CG.OS.HNSC, CG.OS.KIRC, CG.OS.KIRP, CG.OS.LIHC, CG.OS.LUAD, CG.OS.LUSC, CG.OS.PRAD, CG.OS.STAD, CG.OS.THCA, CG.OS.UCEC, CG.PFI.BLCA, CG.PFI.BRCA, CG.PFI.COAD …]
