# Supplementary material for: Characterization of bidirectional gene pairs in The Cancer Genome Atlas (TCGA) dataset
Source: PeerJ. 2019 Jun 17;7:e7107. doi: 10.7717/peerj.7107 (PMC6585903; doi:10.7717/peerj.7107)
Supplement: Supplemental Information 13 [file peerj-07-7107-s013.xlsx]

## Sheet: CG.DFI.BLCA
Gene	Coefficient	Logrank p-value
ENSG00000000460.15	0.00295797	0.812965
ENSG00000000938.11	-0.0395251	0.115766
ENSG00000001167.13	-0.00383263	0.599771
ENSG00000001617.10	0.00085164	0.530579
ENSG00000002834.16	7.50005e-05	0.933783
ENSG00000003096.12	0.0163414	0.594009
ENSG00000003393.13	0.0211598	0.278152
ENSG00000003400.13	-0.0136257	0.310713
ENSG00000003402.18	-0.0019274	0.624094
ENSG00000003989.15	0.00105966	0.875819
ENSG00000004660.13	0.00263932	0.90683
ENSG00000004779.8	-0.00943061	0.217216
ENSG00000004809.12	0.908368	0.101834
ENSG00000004838.12	0.00662158	0.95149
ENSG00000004975.10	-0.00874693	0.528125
ENSG00000005059.14	0.00115552	0.897741
ENSG00000005075.14	-0.0068981	0.373392
ENSG00000005187.10	0.0144934	0.153216
ENSG00000005189.18	0.0351117	0.198291
ENSG00000005249.11	0.0042916	0.672816
ENSG00000005339.11	0.00629431	0.313226
ENSG00000005379.14	0.000510337	0.968146
ENSG00000005486.15	-0.00132497	0.767043
ENSG00000005801.15	-0.00729292	0.567618
ENSG00000005961.16	0.0176106	0.815414
ENSG00000005981.11	-1.3298	0.342963
ENSG00000006047.11	-0.0404844	0.46017
ENSG00000006062.12	-0.00540804	0.658326
ENSG00000006071.10	-0.168041	0.658343
ENSG00000006210.6	-0.00547938	0.231987
ENSG00000006282.18	0.004326	0.192437
ENSG00000006283.16	0.13918	0.551912
ENSG00000006327.12	-0.00185552	0.526421
ENSG00000006534.14	-0.00303777	0.527605
ENSG00000006607.12	0.0100891	0.144005
ENSG00000006704.9	0.00504093	0.50655
ENSG00000006744.17	-0.00102888	0.898125
ENSG00000006756.14	0.00160064	0.634526
ENSG00000006757.10	0.0223229	0.337263
ENSG00000007038.9	0.0118364	0.19701
ENSG00000007047.13	-0.0210746	0.067386
ENSG00000007080.9	-0.00851952	0.200893
ENSG00000007168.11	-0.00332323	0.547121
ENSG00000007216.13	0.0284924	0.136975
ENSG00000007237.17	-0.00267619	0.788393
ENSG00000007264.12	-0.00405319	0.908918
ENSG00000007312.11	-0.00831192	0.558331
ENSG00000007314.10	-0.113657	0.534369
ENSG00000007341.17	-0.00168115	0.98048
ENSG00000007392.15	-0.00868104	0.208715
ENSG00000007402.10	0.0505652	0.281925
ENSG00000007516.12	-0.0147546	0.182604
ENSG00000007541.13	-0.00675499	0.459895
ENSG00000007933.11	-0.0130483	0.619405
ENSG00000008056.11	-0.141013	0.280075
ENSG00000008130.14	-0.00663867	0.456166
ENSG00000008283.14	-0.00230421	0.505402
ENSG00000008516.15	-0.167688	0.0564676
ENSG00000008517.15	-0.00401023	0.117402
ENSG00000008853.15	-0.00568153	0.261655
ENSG00000009724.15	0.283437	0.0792371
ENSG00000010256.9	-0.00200999	0.347219
ENSG00000010319.5	-0.0257871	0.446963
ENSG00000010322.14	-0.00225571	0.596501
ENSG00000010327.9	-0.00380516	0.255036
ENSG00000010379.14	0.69197	0.00334092
ENSG00000010539.10	0.0691595	0.111141
ENSG00000010610.8	-0.0145711	0.0363956
ENSG00000010626.13	-0.0513475	0.275546
ENSG00000010704.17	0.0123146	0.510449
ENSG00000011083.7	0.507114	0.348578
ENSG00000011143.15	-0.00325014	0.905164
ENSG00000011304.15	-0.00298876	0.204942
ENSG00000011376.8	0.00356573	0.844524
ENSG00000011422.10	-0.00118644	0.724191
ENSG00000011451.16	-0.00153064	0.852686
ENSG00000011485.13	-0.0152106	0.118478
ENSG00000011523.12	0.00344706	0.861415
ENSG00000012061.14	-0.0053337	0.482762
ENSG00000012124.13	-0.00445062	0.5251
ENSG00000012211.11	-0.00151854	0.932232
ENSG00000012504.12	0.010031	0.440514
ENSG00000012817.14	-0.00101497	0.835229
ENSG00000012983.10	0.012789	0.304316
ENSG00000013275.6	-0.00489565	0.243682
ENSG00000013306.14	0.0008982	0.657801
ENSG00000013441.14	-0.00876577	0.143343
ENSG00000013561.16	0.0215981	0.0947315
ENSG00000013588.5	-0.000614677	0.296623
ENSG00000014138.7	0.00133567	0.921724
ENSG00000014216.14	-0.000693232	0.464718
ENSG00000014824.12	-0.00841375	0.430255
ENSG00000015285.9	-0.0341508	0.0945938
ENSG00000015520.13	-0.0148169	0.881141
ENSG00000015676.16	-0.00564588	0.422195
ENSG00000016402.11	-0.00534649	0.524203
ENSG00000016864.15	-0.00371125	0.59533
ENSG00000017483.13	0.00122135	0.668395
ENSG00000018280.15	-0.0225761	0.152217
ENSG00000018408.13	0.00314893	0.424483
ENSG00000018625.13	-0.0153559	0.57386
ENSG00000018699.10	-0.0304227	0.241113
ENSG00000019102.10	-0.000747417	0.554567
ENSG00000019505.6	0.0186678	0.238752
ENSG00000019995.6	0.0427155	0.109947
ENSG00000020181.16	0.00364653	0.459633
ENSG00000020426.9	-0.00212338	0.926071
ENSG00000020633.17	-0.0104157	0.403078
ENSG00000021300.12	0.00998431	0.371953
ENSG00000021461.15	0.237624	0.00335756
ENSG00000021488.11	-0.106351	0.547539
ENSG00000021762.18	0.00283708	0.858289
ENSG00000021776.9	-0.00126961	0.911696
ENSG00000022277.11	-0.00735784	0.236071
ENSG00000022556.14	-0.000603208	0.77286
ENSG00000023330.13	-0.000917	0.526697
ENSG00000023445.12	-0.0017812	0.421173
ENSG00000023572.7	0.0104959	0.823623
ENSG00000023608.4	0.0052765	0.715677
ENSG00000023892.10	-0.0157883	0.134165
ENSG00000023902.12	-0.00869731	0.053881
ENSG00000023909.8	-0.00575287	0.400895
ENSG00000024422.10	0.00131983	0.439545
ENSG00000025039.13	0.0183882	0.0666009
ENSG00000025293.14	0.00473011	0.665537
ENSG00000025800.12	0.00588739	0.444254
ENSG00000026950.15	-0.0127557	0.0993928
ENSG00000027847.12	-0.0142517	0.298156
ENSG00000028277.19	-0.0186145	0.426276
ENSG00000029153.13	0.000551936	0.779273
ENSG00000029363.14	-0.00497462	0.445935
ENSG00000029534.18	0.0144492	0.659463
ENSG00000029559.6	0.0312998	0.792342
ENSG00000029993.13	-0.00144922	0.631466
ENSG00000030110.11	-0.00239118	0.663871
ENSG00000031081.9	0.0168622	0.138977
ENSG00000033050.6	-0.00260344	0.712463
ENSG00000033100.13	0.006921	0.212733
ENSG00000033327.11	0.0154948	0.165798
ENSG00000033867.15	0.00149272	0.909848
ENSG00000034510.5	-0.000153429	0.440881
ENSG00000035141.6	-0.0157333	0.0855521
ENSG00000035862.11	0.000435658	0.420963
ENSG00000036054.11	0.0310541	0.0342981
ENSG00000036448.8	-0.108603	0.471607
ENSG00000036530.7	0.527205	0.125535
ENSG00000037280.14	0.0306693	0.0367813
ENSG00000037757.12	0.00432913	0.794668
ENSG00000037965.5	0.0342768	0.811331
ENSG00000038358.13	0.010314	0.372371
ENSG00000038532.13	-0.00473364	0.582543
ENSG00000039068.17	0.000355781	0.395026
ENSG00000039987.5	-0.154217	0.690164
ENSG00000040199.17	0.0603849	0.145206
ENSG00000040633.11	-0.0264535	0.0644624
ENSG00000041357.14	-0.00520287	0.0892545
ENSG00000041802.9	-0.00228869	0.815687
ENSG00000041982.13	-2.76249e-05	0.959635
ENSG00000042062.10	0.0175986	0.285631
ENSG00000042286.13	-0.0053781	0.62275
ENSG00000042753.10	-0.0018978	0.5542
ENSG00000043143.19	-0.00301014	0.497073
ENSG00000044090.7	-0.0090836	0.237259
ENSG00000044446.10	0.00409302	0.410162
ENSG00000046774.9	-0.00221055	0.892391
ENSG00000047457.12	0.00088393	0.332436
ENSG00000047597.5	0.00988944	0.495854
ENSG00000047617.13	0.381626	0.0125967
ENSG00000047634.13	0.00628088	0.707755
ENSG00000047849.20	-0.00170989	0.326257
ENSG00000048544.5	-0.00532125	0.420974
ENSG00000049192.13	-0.00703047	0.943484
ENSG00000049245.11	-0.00133444	0.782536
ENSG00000049246.13	0.0136773	0.234964
ENSG00000049656.12	-0.00122989	0.530415
ENSG00000049769.11	0.0311526	0.383138
ENSG00000050405.12	0.00029282	0.834278
ENSG00000050555.16	-0.00405349	0.815375
ENSG00000050748.16	0.0169158	0.229067
ENSG00000050767.14	0.0113691	0.941276
ENSG00000051382.7	0.0207068	0.0846292
ENSG00000051825.13	0.0399794	0.0243712
ENSG00000052344.14	0.00224666	0.170859
ENSG00000053254.14	0.00416825	0.53148
ENSG00000053438.8	-0.0174505	0.56215
ENSG00000053501.11	0.0056497	0.708592
ENSG00000053900.9	-0.00463632	0.674831
ENSG00000054118.12	-7.48775e-06	0.998865
ENSG00000054179.10	0.0214845	0.158199
ENSG00000054219.10	0.00979734	0.347096
ENSG00000054392.11	-0.0017123	0.954778
ENSG00000054598.6	-0.0103987	0.211143
ENSG00000054938.14	-0.00214353	0.758205
ENSG00000054965.9	0.010558	0.235128
ENSG00000054967.11	-0.0293295	0.268877
ENSG00000054983.15	0.00556549	0.693584
ENSG00000055211.11	0.00889307	0.397448
ENSG00000055483.18	0.00772846	0.439468
ENSG00000055917.14	0.00399071	0.34698
ENSG00000055955.14	0.101495	0.0992546
ENSG00000055957.9	-0.906188	0.130205
ENSG00000056558.9	-0.0185474	0.200061
ENSG00000056586.14	0.0139874	0.029744
ENSG00000057252.11	0.00529751	0.243494
ENSG00000057468.6	0.00463408	0.993863
ENSG00000057593.12	0.102089	0.0022156
ENSG00000058453.15	-0.0136342	0.214698
ENSG00000058600.14	0.0101238	0.181681
ENSG00000058673.14	0.0127541	0.00941887
ENSG00000058729.9	0.0165692	0.59812
ENSG00000059145.17	0.00520282	0.890329
ENSG00000059573.7	0.00317143	0.611627
ENSG00000059915.15	-0.00648609	0.559101
ENSG00000060140.7	-0.00256331	0.894999
ENSG00000060558.3	-0.00192466	0.5906
ENSG00000060642.9	0.0169781	0.501007
ENSG00000061273.16	-0.00502287	0.214995
ENSG00000062096.13	0.063341	0.860437
ENSG00000062524.14	-0.032401	0.494109
ENSG00000062822.11	-0.012826	0.185919
ENSG00000063015.18	-0.00600792	0.946914
ENSG00000063046.16	-0.000692657	0.730421
ENSG00000063127.14	-0.00347535	0.967288
ENSG00000063241.6	-0.0107019	0.0985892
ENSG00000063244.11	-0.00568095	0.0936066
ENSG00000064012.20	0.0039426	0.755396
ENSG00000064201.14	-0.297122	0.123831
ENSG00000064218.4	0.178485	0.583751
ENSG00000064313.10	0.0119583	0.2555
ENSG00000064545.13	-0.00178178	0.882613
ENSG00000064547.12	-0.00665713	0.456973
ENSG00000064601.15	-0.00038942	0.783819
ENSG00000064652.9	0.0386831	0.221134
ENSG00000064666.13	-0.00350987	0.0262944
ENSG00000064687.11	-0.00251099	0.736728
ENSG00000064886.12	-0.00358476	0.630749
ENSG00000064961.17	-0.0121742	0.0306476
ENSG00000064999.13	-0.00136067	0.621493
ENSG00000065029.13	-0.00333593	0.780199
ENSG00000065060.15	0.0278971	0.00915174
ENSG00000065268.9	-0.01142	0.180065
ENSG00000065328.15	-0.00727083	0.651929
ENSG00000065371.16	0.632024	0.251029
ENSG00000065615.12	-0.00798839	0.672823
ENSG00000065665.19	-0.00264992	0.95854
ENSG00000065717.13	-0.00193703	0.586675
ENSG00000065802.10	0.00880934	0.54806
ENSG00000065978.16	-0.000978538	0.262034
ENSG00000066084.11	0.000375831	0.895206
ENSG00000066117.13	0.00294459	0.721245
ENSG00000066279.15	0.012008	0.000272011
ENSG00000066336.10	-0.0187515	0.0683883
ENSG00000066379.13	-0.0301762	0.0712472
ENSG00000066422.4	0.0196939	0.381614
ENSG00000066629.15	0.0161103	0.257339
ENSG00000066651.16	-0.0173298	0.676417
ENSG00000066654.11	0.01105	0.214016
ENSG00000066926.9	-0.0111782	0.547355
ENSG00000067177.13	0.0233629	0.176121
ENSG00000067182.6	-0.00220857	0.255386
ENSG00000067191.14	-0.00269826	0.841573
ENSG00000067225.16	-0.00015769	0.427017
ENSG00000067334.12	-0.0187443	0.0500983
ENSG00000067596.9	0.0100773	0.246992
ENSG00000067829.17	-0.00960279	0.235127
ENSG00000067840.11	0.0116598	0.544373
ENSG00000067900.6	0.00739081	0.348151
ENSG00000067955.12	0.00683183	0.356768
ENSG00000067992.11	0.00454212	0.851191
ENSG00000068001.12	-0.00744195	0.403178
ENSG00000068079.6	-0.000891703	0.774648
ENSG00000068120.13	-0.00151879	0.793028
ENSG00000068137.13	-0.00179518	0.712234
ENSG00000068308.12	-0.00627085	0.493538
ENSG00000068400.12	-0.00669875	0.504137
ENSG00000068615.15	0.00911436	0.616791
ENSG00000068724.14	-0.00718073	0.290637
ENSG00000068745.13	-0.00241819	0.541915
ENSG00000068781.19	-0.970819	0.459887
ENSG00000068831.17	-0.0539321	0.225187
ENSG00000069399.11	-0.00240515	0.508427
ENSG00000069493.13	-0.0110651	0.464945
ENSG00000069712.10	0.0459638	0.471144
ENSG00000069956.10	0.00128062	0.735396
ENSG00000069966.17	-0.0249401	0.157426
ENSG00000070214.14	0.00133049	0.345959
ENSG00000070404.8	0.00151358	0.234221
ENSG00000070444.13	-0.0116589	0.440922
ENSG00000070476.13	0.0190263	0.174263
ENSG00000070601.8	-0.104232	0.522023
ENSG00000070729.12	0.0408588	0.0026552
ENSG00000070731.8	0.00160015	0.715234
ENSG00000070785.15	-0.028209	0.181936
ENSG00000070808.14	0.0448561	0.711301
ENSG00000070831.14	-0.00308519	0.234646
ENSG00000070915.8	0.0696321	0.099432
ENSG00000070950.8	-0.0158149	0.422004
ENSG00000071127.15	-0.00272062	0.0651608
ENSG00000071564.13	-0.00249602	0.567011
ENSG00000071626.15	-0.00539719	0.226162
ENSG00000071655.16	-0.00153827	0.741787
ENSG00000071859.13	-0.00339671	0.320251
ENSG00000071889.15	-0.00462803	0.463015
ENSG00000072042.11	-0.00123927	0.819751
ENSG00000072062.12	-0.00886389	0.202363
ENSG00000072134.14	0.00122703	0.919242
ENSG00000072195.13	-0.00101565	0.883144
ENSG00000072415.7	0.0283365	0.00526108
ENSG00000072736.17	0.020003	0.143695
ENSG00000072818.10	-0.0234539	0.1401
ENSG00000072832.13	0.000548408	0.942828
ENSG00000072858.9	-0.0109337	0.39414
ENSG00000072958.7	-0.00941149	0.347394
ENSG00000073008.13	-0.00487944	0.469137
ENSG00000073146.14	0.0514899	0.842537
ENSG00000073150.12	0.00630301	0.591082
ENSG00000073464.10	0.00676413	0.859554
ENSG00000073670.12	-0.0811183	0.365567
ENSG00000073711.9	0.0376514	0.00078622
ENSG00000073734.8	0.0821726	0.776983
ENSG00000073737.15	-0.00153196	0.836926
ENSG00000073905.8	0.330705	0.833005
ENSG00000074266.16	-0.02964	0.19791
ENSG00000074319.11	-0.0158561	0.0959257
ENSG00000074370.16	-0.0042132	0.307843
ENSG00000074527.10	-0.00749483	0.162244
ENSG00000074590.12	0.00358268	0.684349
ENSG00000074660.14	-0.0352771	0.374754
ENSG00000074842.6	-0.00730416	0.098194
ENSG00000074966.9	-0.0347367	0.681275
ENSG00000075340.21	0.00815842	0.480848
ENSG00000075426.10	0.000467056	0.472618
ENSG00000076003.4	-0.00130781	0.789269
ENSG00000076043.8	0.00638605	0.295585
ENSG00000076067.10	0.00735714	0.537885
ENSG00000076108.10	0.00193553	0.650457
ENSG00000076248.9	-0.0121172	0.138731
ENSG00000076258.8	0.121065	0.00903059
ENSG00000076321.9	0.0455346	0.00859432
ENSG00000076554.14	0.00121246	0.747425
ENSG00000076555.14	-0.0183802	0.372086
ENSG00000076650.5	0.0144775	0.464564
ENSG00000076706.13	0.0037137	0.0490005
ENSG00000076864.18	-0.00055749	0.926954
ENSG00000076928.16	-0.00545102	0.160516
ENSG00000077009.12	-2.12212	0.557841
ENSG00000077044.8	0.00210587	0.842713
ENSG00000077147.13	0.000451536	0.849356
ENSG00000077279.15	-0.148295	0.768127
ENSG00000077454.14	-0.0121464	0.685145
ENSG00000077616.9	0.196169	0.144927
ENSG00000077713.17	0.00862691	0.462028
ENSG00000077782.18	0.00115102	0.740647
ENSG00000078070.10	0.000365301	0.946213
ENSG00000078081.6	0.00406837	0.372428
ENSG00000078124.10	0.0207932	0.103052
ENSG00000078142.10	-0.00413463	0.773731
ENSG00000078319.8	-0.00659693	0.902975
ENSG00000078399.14	-0.0167941	0.178579
ENSG00000078596.9	-0.00789371	0.635326
ENSG00000078747.11	0.00895945	0.0638703
ENSG00000078898.6	-1.06661	0.408936
ENSG00000079246.14	-0.000528942	0.73967
ENSG00000079277.18	-0.044943	0.0124256
ENSG00000079313.10	-0.016222	0.245465
ENSG00000079335.16	-0.00417958	0.913724
ENSG00000079337.14	-0.016772	0.187949
ENSG00000079387.12	0.000732717	0.970707
ENSG00000079393.19	0.276628	0.062579
ENSG00000079432.6	-0.000954945	0.867839
ENSG00000079459.11	-0.00169134	0.337398
ENSG00000079557.4	2.25176	0.0715637
ENSG00000079616.11	0.000446827	0.878287
ENSG00000079805.15	-0.00291815	0.0813893
ENSG00000079950.12	0.00511839	0.420837
ENSG00000079999.12	-0.00433828	0.425786
ENSG00000080224.16	0.144998	0.359179
ENSG00000080644.14	-0.115808	0.505678
ENSG00000080854.13	0.0875135	0.51787
ENSG00000081051.6	0.0403088	0.698196
ENSG00000081148.11	0.185515	0.676379
ENSG00000081154.10	3.89768e-05	0.995475
ENSG00000081181.6	-0.00248344	0.863219
ENSG00000081248.9	-0.298352	0.790234
ENSG00000081307.11	0.0376987	0.0162496
ENSG00000081692.11	-0.0161063	0.553796
ENSG00000081760.15	0.0112856	0.241162
ENSG00000081803.14	0.0215046	0.100476
ENSG00000081818.3	0.000543744	0.989168
ENSG00000081853.14	0.333028	0.000500064
ENSG00000082068.7	0.000805458	0.954294
ENSG00000082074.14	-0.00745373	0.247423
ENSG00000082126.16	2.14374	0.000927127
ENSG00000082153.16	-0.0016235	0.687284
ENSG00000082269.15	0.0352209	0.0106473
ENSG00000082397.14	-0.000844239	0.925154
ENSG00000082512.13	-0.0229218	0.160228
ENSG00000082781.10	-0.000231707	0.884817
ENSG00000083099.9	0.0229523	0.152415
ENSG00000083123.13	0.0148055	0.0379004
ENSG00000083223.16	0.00726242	0.347469
ENSG00000083444.15	-5.83321e-05	0.963686
ENSG00000083642.17	0.0101239	0.216002
ENSG00000083782.6	-0.0755905	0.468423
ENSG00000083807.8	-0.0124769	0.661378
ENSG00000083812.10	0.0328843	0.542368
ENSG00000083838.14	-0.031152	0.405241
ENSG00000083844.9	0.0146711	0.234878
ENSG00000083845.7	-0.00133361	0.0772197
ENSG00000083896.11	0.00102167	0.916942
ENSG00000084092.6	-0.0233911	0.242523
ENSG00000084652.14	0.00772612	0.165887
ENSG00000084693.14	-0.0100873	0.425291
ENSG00000084764.9	-0.0152793	0.29764
ENSG00000085063.13	0.000467083	0.578385
ENSG00000085117.10	0.00139113	0.465376
ENSG00000085274.14	0.0354651	0.328849
ENSG00000085377.12	0.00141535	0.846973
ENSG00000085433.14	0.0125735	0.578372
ENSG00000085465.12	0.00860517	0.529498
ENSG00000085552.15	4.00463e-05	0.987441
ENSG00000085644.12	-0.00612891	0.754112
ENSG00000085662.12	4.81459e-05	0.964609
ENSG00000085831.14	-0.00206454	0.807404
ENSG00000085832.15	-0.00887108	0.33063
ENSG00000085978.20	-0.0297189	0.17036
ENSG00000085998.12	-0.0127502	0.024442
ENSG00000086015.19	-0.00593338	0.38828
ENSG00000086159.11	-0.0396709	0.847205
ENSG00000086475.13	-0.00255339	0.713852
ENSG00000086506.2	0.195084	0.799371
ENSG00000086589.10	-0.000254701	0.986001
ENSG00000086619.12	-0.00930991	0.759927
ENSG00000086730.15	-0.038659	0.133394
ENSG00000086848.13	0.135094	0.0474402
ENSG00000086967.9	-0.25564	0.338982
ENSG00000087008.14	-0.00397001	0.541312
ENSG00000087076.7	0.0100514	0.106143
ENSG00000087077.10	-0.00299442	0.39632
ENSG00000087085.12	0.00267041	0.869666
ENSG00000087086.12	-0.000139188	0.27152
ENSG00000087087.17	-0.0015515	0.763779
ENSG00000087088.18	-0.0166389	0.00660877
ENSG00000087111.19	0.00389816	0.314071
ENSG00000087152.14	0.00655267	0.255056
ENSG00000087191.11	0.000543711	0.823305
ENSG00000087237.9	-0.0578217	0.594909
ENSG00000087245.11	-0.000116574	0.745296
ENSG00000087253.10	-0.000284836	0.971573
ENSG00000087266.14	-0.00670296	0.258579
ENSG00000087274.15	-0.00287084	0.301352
ENSG00000087338.4	-0.0107947	0.477264
ENSG00000087502.16	-0.000868055	0.913937
ENSG00000087589.15	-0.28879	0.0862491
ENSG00000087995.14	-0.00197542	0.938853
ENSG00000088002.10	0.00108563	0.877581
ENSG00000088205.11	-0.000987771	0.885461
ENSG00000088247.14	-0.00119441	0.710247
ENSG00000088256.7	-0.00243169	0.728173
ENSG00000088280.17	0.0144953	0.0396363
ENSG00000088367.19	0.00277081	0.275542
ENSG00000088538.12	-0.0026764	0.835609
ENSG00000088826.16	-0.0221755	0.196434
ENSG00000088827.11	-0.0180112	0.153068
ENSG00000088899.13	0.00638965	0.442167
ENSG00000089012.13	-0.113642	0.0610146
ENSG00000089041.15	-0.0342542	0.53454
ENSG00000089057.13	0.00247751	0.234208
ENSG00000089063.13	-0.00295481	0.581155
ENSG00000089101.16	0.0523796	0.178361
ENSG00000089127.11	-0.000770959	0.61437
ENSG00000089169.13	0.059053	0.884624
ENSG00000089280.17	-0.00355635	0.106124
ENSG00000089351.13	-0.00252343	0.616221
ENSG00000089558.7	-0.0786433	0.380318
ENSG00000089597.15	-0.00087471	0.498773
ENSG00000089639.9	-0.0171037	0.115857
ENSG00000089685.13	0.00271476	0.503785
ENSG00000089692.7	-0.00884122	0.434953
ENSG00000089775.10	-0.014854	0.659092
ENSG00000090006.16	-0.00145768	0.622013
ENSG00000090097.19	-0.00262425	0.676629
ENSG00000090263.14	-0.00246029	0.827185
ENSG00000090316.14	-0.00733159	0.328056
ENSG00000090382.5	-0.00426066	0.0870517
ENSG00000090447.10	-0.0184192	0.385536
ENSG00000090470.13	-0.0522463	0.0520027
ENSG00000090512.10	-0.0317623	0.930239
ENSG00000090554.11	-0.0978284	0.337994
ENSG00000090615.11	0.000644881	0.910748
ENSG00000090621.12	-0.00244257	0.17728
ENSG00000090659.16	-0.0133155	0.429669
ENSG00000090674.14	-0.0208635	0.270366
ENSG00000090686.14	-0.0108504	0.413304
ENSG00000090863.10	0.00378364	0.115087
ENSG00000090924.13	-0.00404781	0.691192
ENSG00000090932.9	-0.0311489	0.751587
ENSG00000090975.11	0.00543227	0.77334
ENSG00000091039.15	0.0126905	0.0480895
ENSG00000091073.18	-0.000886329	0.885094
ENSG00000091106.17	-0.283582	0.139154
ENSG00000091317.7	-0.000257545	0.91356
ENSG00000091490.9	-0.00146527	0.667415
ENSG00000091513.13	0.000709358	0.00235724
ENSG00000091536.15	0.102183	0.581902
ENSG00000091542.8	0.000148695	0.982774
ENSG00000091844.6	0.0372599	0.243653
ENSG00000091947.8	-0.0126293	0.274382
ENSG00000092010.13	-0.00536689	0.00437855
ENSG00000092054.12	-0.679722	0.249592
ENSG00000092067.5	-1.65534	0.273916
ENSG00000092068.17	0.000428026	0.841356
ENSG00000092096.13	-0.0113871	0.428485
ENSG00000092108.19	-0.0085261	0.535663
ENSG00000092140.13	0.0247215	0.359056
ENSG00000092199.16	-0.00402833	0.0265496
ENSG00000092208.15	0.0018697	0.962712
ENSG00000092295.10	0.00191704	0.204271
ENSG00000092330.14	-0.0108961	0.303378
ENSG00000092377.12	-0.027663	0.74875
ENSG00000092439.12	0.00936415	0.162109
ENSG00000092758.14	0.00279822	0.895132
ENSG00000092871.15	0.00676094	0.613012
ENSG00000092929.10	-0.00329327	0.187713
ENSG00000093134.12	0.0237294	0.492575
ENSG00000094631.17	-0.00770164	0.474094
ENSG00000094796.4	0.00383579	0.00156452
ENSG00000094804.8	-0.000523474	0.944851
ENSG00000094914.11	-0.0189497	0.284033
ENSG00000095059.14	-0.0263178	0.0182333
ENSG00000095110.6	0.117934	0.133056
ENSG00000095203.13	0.00558161	0.487993
ENSG00000095261.12	0.00545872	0.592287
ENSG00000095370.18	-0.0170764	0.482035
ENSG00000095383.18	0.00560668	0.0738566
ENSG00000095397.12	-0.0107094	0.717529
ENSG00000095464.9	0.479218	0.282169
ENSG00000095485.15	-0.0080259	0.764814
ENSG00000095539.14	0.00821896	0.155194
ENSG00000095585.15	-0.00500536	0.705606
ENSG00000095587.8	0.00601541	0.858726
ENSG00000095627.8	0.0808113	0.794072
ENSG00000095739.10	0.000925256	0.501205
ENSG00000095752.5	0.00533429	0.280413
ENSG00000095970.15	-0.0291109	0.162933
ENSG00000096092.5	0.00770935	0.560095
ENSG00000096401.7	-3.87422e-05	0.99601
ENSG00000096433.9	0.000719164	0.692358
ENSG00000096717.10	0.0134114	0.498897
ENSG00000097007.16	0.00242233	0.637751
ENSG00000097096.8	0.0353333	0.253618
ENSG00000099204.17	0.00419521	0.092078
ENSG00000099260.9	0.00227038	0.614746
ENSG00000099308.9	-0.0522672	0.0832875
ENSG00000099330.7	-0.011175	0.438205
ENSG00000099337.4	0.00204636	0.744122
ENSG00000099338.21	0.0135501	0.832564
ENSG00000099341.10	-0.00254666	0.411284
ENSG00000099385.10	-0.00725046	0.242778
ENSG00000099399.5	0.00319714	0.698048
ENSG00000099617.3	0.0862984	0.104856
ENSG00000099624.6	-0.00352196	0.35699
ENSG00000099800.6	-0.00563127	0.282598
ENSG00000099804.7	-0.0103368	0.140086
ENSG00000099812.7	-0.000371042	0.869844
ENSG00000099814.14	-0.000919026	0.825938
ENSG00000099821.12	-0.0130052	0.167249
ENSG00000099864.16	0.00100718	0.885621
ENSG00000099875.13	-0.00361204	0.0776595
ENSG00000099901.15	-0.0081288	0.0680882
ENSG00000099904.14	-0.016842	0.0601042
ENSG00000099942.11	-0.00188982	0.538351
ENSG00000099954.17	0.0205802	0.0495921
ENSG00000099957.15	-0.177303	0.163248
ENSG00000099960.11	-0.012449	0.436695
ENSG00000099974.7	-0.0941674	0.317504
ENSG00000099985.3	-0.0805552	0.128157
ENSG00000099991.15	-0.00477758	0.419364
ENSG00000099992.14	-0.0122848	0.507618
ENSG00000099994.10	-0.00804466	0.524395
ENSG00000099998.16	-0.0216566	0.0355959
ENSG00000100012.10	5.33569	0.0088033
ENSG00000100023.16	-0.0128373	0.225943
ENSG00000100031.17	0.0140248	0.18839
ENSG00000100034.12	0.00763355	0.512809
ENSG00000100038.18	-0.12007	0.804412
ENSG00000100053.8	0.0587186	0.069102
ENSG00000100056.10	-0.0366871	0.128145
ENSG00000100060.16	-0.0513289	0.106625
ENSG00000100065.13	-0.00528532	0.490079
ENSG00000100068.10	-0.0393567	0.254636
ENSG00000100083.17	-0.016011	0.0523411
ENSG00000100092.19	-0.00301626	0.342841
ENSG00000100095.17	0.000659943	0.985853
ENSG00000100097.10	-0.000504151	0.464279
ENSG00000100101.14	-3.19271	0.401849
ENSG00000100106.18	-0.0142957	0.113863
ENSG00000100116.15	-0.00274355	0.833994
ENSG00000100122.5	-0.954855	0.135906
ENSG00000100139.12	0.000525954	0.810989
ENSG00000100142.13	-1.65599	0.268741
ENSG00000100147.12	0.020221	0.709577
ENSG00000100156.9	-0.0576563	0.560897
ENSG00000100170.8	0.0156208	0.12967
ENSG00000100197.19	-0.11797	0.57512
ENSG00000100206.8	0.0738405	0.561592
ENSG00000100207.17	0.00795341	0.332017
ENSG00000100220.10	-0.0118476	0.0788887
ENSG00000100226.14	-0.014222	0.123171
ENSG00000100276.9	0.0250152	0.392604
ENSG00000100280.15	-0.000110787	0.943003
ENSG00000100281.12	0.00032428	0.983327
ENSG00000100292.15	-0.000544295	0.746188
ENSG00000100297.14	-0.00356027	0.355271
ENSG00000100298.14	-0.19845	0.145913
ENSG00000100335.11	0.00705093	0.501396
ENSG00000100348.8	-0.0100622	0.10625
ENSG00000100350.13	0.0090156	0.0484411
ENSG00000100353.16	-0.00449843	0.0818703
ENSG00000100359.19	-0.00680147	0.217557
ENSG00000100373.8	0.00117786	0.252089
ENSG00000100385.12	-0.0225061	0.080946
ENSG00000100399.14	-0.0127598	0.704998
ENSG00000100401.18	-0.00232714	0.356983
ENSG00000100403.11	0.000805993	0.86418
ENSG00000100425.17	-0.00312722	0.794287
ENSG00000100426.6	0.0127797	0.371938
ENSG00000100427.14	-0.0693936	0.728598
ENSG00000100441.8	0.00232462	0.703847
ENSG00000100445.15	-0.0412635	0.499904
ENSG00000100478.13	-0.0674647	0.257774
ENSG00000100479.11	-0.00127912	0.974426
ENSG00000100490.8	0.119441	0.560595
ENSG00000100519.10	-0.0112658	0.268696
ENSG00000100522.7	-0.00888072	0.546875
ENSG00000100567.11	-0.00740702	0.185202
ENSG00000100568.9	-0.00681127	0.409712
ENSG00000100592.14	-0.000356306	0.956566
ENSG00000100593.16	0.0527335	0.0643349
ENSG00000100596.5	-0.00419005	0.400293
ENSG00000100628.10	-0.0153498	0.472585
ENSG00000100652.4	-0.0118644	0.670438
ENSG00000100714.14	-0.00162118	0.717886
ENSG00000100726.13	-0.00928255	0.29621
ENSG00000100749.6	-0.0130554	0.432507
ENSG00000100802.13	0.0118634	0.774093
ENSG00000100804.17	-0.00434383	0.283636
ENSG00000100842.11	-0.000425168	0.930716
ENSG00000100884.8	0.0250529	0.863886
ENSG00000100908.12	-0.0468312	0.0511964
ENSG00000100918.11	-0.0861429	0.00677085
ENSG00000100926.13	-0.0148085	0.791632
ENSG00000100949.13	-0.0152931	0.263549
ENSG00000100979.13	-7.60707e-05	0.951602
ENSG00000100987.13	-1.44171	0.558175
ENSG00000100997.17	-0.0008503	0.659717
ENSG00000101049.13	0.00588094	0.2588
ENSG00000101052.11	-0.00879603	0.499415
ENSG00000101084.15	-0.0093271	0.486744
ENSG00000101096.18	-0.00345966	0.825622
ENSG00000101104.11	-0.000400089	0.881812
ENSG00000101146.11	-0.0130388	0.30334
ENSG00000101161.7	-0.00461085	0.238088
ENSG00000101203.15	0.317982	0.728706
ENSG00000101220.16	-0.00661905	0.386173
ENSG00000101222.11	-0.431108	0.230575
ENSG00000101236.15	0.00954766	0.303256
ENSG00000101255.9	-0.000771428	0.884995
ENSG00000101292.7	-6.86941	0.376219
ENSG00000101294.15	-0.00044727	0.820051
ENSG00000101307.14	-0.125133	0.20922
ENSG00000101310.13	-0.00353525	0.609834
ENSG00000101311.14	0.00545614	0.0890113
ENSG00000101331.14	-0.048251	0.720696
ENSG00000101336.11	-0.0299391	0.0546029
ENSG00000101337.14	0.0028665	0.0154844
ENSG00000101342.8	0.0411495	0.248883
ENSG00000101367.8	0.00427134	0.10626
ENSG00000101391.19	0.0143272	0.240679
ENSG00000101400.5	0.00193706	0.837069
ENSG00000101443.16	-0.00121442	0.556883
ENSG00000101445.8	-0.0253981	0.287643
ENSG00000101447.12	0.00169952	0.821634
ENSG00000101448.12	-1.80421	0.411728
ENSG00000101460.11	-0.00116183	0.905266
ENSG00000101489.17	-0.0404575	0.640626
ENSG00000101680.12	0.0116124	0.0400025
ENSG00000101883.4	0.0523747	0.456159
ENSG00000101911.11	0.00168125	0.664918
ENSG00000101928.11	0.0354324	0.00318301
ENSG00000101945.15	0.0068969	0.703867
ENSG00000102001.11	-0.0600532	0.713439
ENSG00000102003.9	-0.00884492	0.808355
ENSG00000102007.9	-0.0004233	0.758399
ENSG00000102024.16	0.0019032	0.202377
ENSG00000102038.14	0.0110757	0.0302372
ENSG00000102054.16	0.000521861	0.871575
ENSG00000102057.8	0.0779494	0.0764518
ENSG00000102078.14	0.0292625	0.613385
ENSG00000102096.9	-0.0433624	0.00694142
ENSG00000102100.13	-0.00370681	0.612038
ENSG00000102119.9	-0.00864713	0.301659
ENSG00000102145.12	-0.0334292	0.973938
ENSG00000102178.11	-0.00396701	0.490505
ENSG00000102195.8	-0.538385	0.742734
ENSG00000102225.14	0.00376364	0.292087
ENSG00000102226.8	-0.00908082	0.145494
ENSG00000102239.4	0.0597685	0.109388
ENSG00000102241.10	-0.00206929	0.689373
ENSG00000102245.6	-0.54663	0.191934
ENSG00000102359.5	0.00223827	0.649209
ENSG00000102384.12	0.0583962	0.091998
ENSG00000102710.18	-0.00656734	0.537151
ENSG00000102738.7	0.00362457	0.884044
ENSG00000102760.12	0.0092876	0.474023
ENSG00000102781.12	0.0151477	0.425545
ENSG00000102802.8	-0.0299292	0.216763
ENSG00000102805.12	0.0152385	0.655041
ENSG00000102854.13	0.00465358	0.0447889
ENSG00000102858.11	-0.00557553	0.554599
ENSG00000102870.5	0.0103505	0.356403
ENSG00000102898.10	7.08192e-05	0.980054
ENSG00000102901.11	-0.000548672	0.939168
ENSG00000102908.19	0.00583868	0.189299
ENSG00000102962.4	-0.0331903	0.253952
ENSG00000103024.6	-0.0147825	0.0592383
ENSG00000103034.13	-0.0077551	0.264733
ENSG00000103037.10	-0.0184604	0.509646
ENSG00000103043.13	0.000168673	0.980984
ENSG00000103047.6	0.0115708	0.612094
ENSG00000103064.12	0.0167894	0.0687553
ENSG00000103066.11	-0.00268241	0.781976
ENSG00000103067.10	0.00130184	0.525453
ENSG00000103154.8	-0.335781	0.389769
ENSG00000103168.15	-0.00224785	0.728747
ENSG00000103196.10	0.0021606	0.335837
ENSG00000103202.11	-0.0034016	0.426688
ENSG00000103226.16	0.0530701	0.39712
ENSG00000103260.7	-0.0275254	0.110648
ENSG00000103264.14	-0.0140828	0.413379
ENSG00000103269.12	0.0719736	0.293584
ENSG00000103313.10	-0.144583	0.354133
ENSG00000103319.10	0.00883123	0.205143
ENSG00000103335.18	-0.00293251	0.207469
ENSG00000103351.11	-0.0514862	0.1033
ENSG00000103355.11	0.0261436	0.0277731
ENSG00000103375.9	0.0680008	0.958966
ENSG00000103426.11	-4.63914	0.290247
ENSG00000103460.15	-0.000857989	0.73487
ENSG00000103485.16	0.0040961	0.011017
ENSG00000103489.10	0.00117978	0.886304
ENSG00000103495.12	-0.000628474	0.915851
ENSG00000103507.12	-0.0103976	0.279941
ENSG00000103510.18	-0.0120637	0.496248
ENSG00000103512.13	0.00244723	0.727362
ENSG00000103534.15	0.00439105	0.339415
ENSG00000103540.15	0.00242787	0.783309
ENSG00000103544.13	-0.00104693	0.892648
ENSG00000103550.12	0.00916555	0.495039
ENSG00000103653.15	-0.012112	0.0594182
ENSG00000103657.12	0.0125639	0.114584
ENSG00000103742.10	-0.00809609	0.875401
ENSG00000103932.10	-0.00599445	0.735049
ENSG00000104055.13	-0.0112069	0.615825
ENSG00000104142.9	0.00566668	0.604014
ENSG00000104205.11	0.0451488	0.490968
ENSG00000104213.11	0.00300402	0.846551
ENSG00000104218.12	0.0167875	0.496764
ENSG00000104219.11	-0.00556454	0.448193
ENSG00000104221.11	-0.00961191	0.785984
ENSG00000104341.15	0.000883744	0.573137
ENSG00000104450.11	-0.00558758	0.614236
ENSG00000104522.14	-0.00271639	0.374795
ENSG00000104524.12	0.00190859	0.856442
ENSG00000104529.16	-0.00369292	0.33091
ENSG00000104635.12	0.00352027	0.331524
ENSG00000104679.9	-0.00491763	0.747323
ENSG00000104728.14	0.0361847	0.0739184
ENSG00000104731.12	-0.0111223	0.338644
ENSG00000104805.14	-0.0015714	0.319636
ENSG00000104808.6	0.00185272	0.965122
ENSG00000104818.14	2.36117	0.47621
ENSG00000104823.7	-0.00656966	0.0279134
ENSG00000104824.15	-0.00488499	0.149455
ENSG00000104826.10	-0.868105	0.146419
ENSG00000104827.12	0.310826	0.121742
ENSG00000104848.1	0.72424	0.330909
ENSG00000104852.13	-0.00272173	0.187519
ENSG00000104856.12	-0.00660243	0.418614
ENSG00000104859.13	-0.0237913	0.0197489
ENSG00000104863.10	-0.0212703	0.592677
ENSG00000104870.11	-0.00331695	0.320281
ENSG00000104884.13	-0.0247314	0.112406
ENSG00000104889.4	-0.00242065	0.752653
ENSG00000104918.6	-0.832777	0.273888
ENSG00000104941.6	0.698076	0.76736
ENSG00000104957.12	-0.00619114	0.629138
ENSG00000104964.13	-0.00154086	0.0757822
ENSG00000104970.9	-0.781791	0.589821
ENSG00000104972.13	-0.063498	0.0795027
ENSG00000104974.9	-0.322408	0.355678
ENSG00000104976.10	-0.0355027	0.127206
ENSG00000104980.6	-0.0159017	0.242463
ENSG00000104983.7	-0.0280751	0.229987
ENSG00000105048.15	0.005457	0.585565
ENSG00000105058.10	-0.0102752	0.200511
ENSG00000105063.17	-0.00813448	0.0821312
ENSG00000105085.9	-0.0340181	0.669415
ENSG00000105122.11	-0.0270666	0.12083
ENSG00000105131.6	-0.000600497	0.914475
ENSG00000105136.18	-0.0229037	0.616471
ENSG00000105137.11	0.00852898	0.50295
ENSG00000105146.11	0.022588	0.606856
ENSG00000105176.16	0.000306804	0.914874
ENSG00000105197.9	-0.0117956	0.150969
ENSG00000105202.6	-0.00256047	0.258118
ENSG00000105205.6	-0.118112	0.650058
ENSG00000105219.7	-0.0614824	0.598473
ENSG00000105221.15	0.000596029	0.853982
ENSG00000105227.13	-0.0331526	0.582543
ENSG00000105270.13	-0.00181802	0.801564
ENSG00000105278.9	-0.236428	0.433944
ENSG00000105289.13	0.000587623	0.917507
ENSG00000105290.10	0.00209381	0.711925
ENSG00000105298.12	-0.0518859	0.0300538
ENSG00000105321.11	-0.0400563	0.0389309
ENSG00000105323.15	-0.00359152	0.112325
ENSG00000105325.12	-0.00825639	0.334631
ENSG00000105341.17	-0.016159	0.299301
ENSG00000105355.7	0.00339127	0.290185
ENSG00000105366.14	-0.840073	0.0283788
ENSG00000105369.8	-0.00549025	0.423528
ENSG00000105372.5	-0.000532084	0.108136
ENSG00000105373.17	-0.00310032	0.0271592
ENSG00000105374.8	-0.00495606	0.594066
ENSG00000105379.8	-0.000768762	0.86261
ENSG00000105383.13	-0.220836	0.0594152
ENSG00000105398.3	0.00453087	0.325134
ENSG00000105402.6	-0.0135241	0.066332
ENSG00000105404.9	-0.00510197	0.206689
ENSG00000105409.14	-0.0287903	0.588408
ENSG00000105419.16	-0.0228454	0.201944
ENSG00000105447.11	-0.0229451	0.0574726
ENSG00000105497.6	-0.0104978	0.431895
ENSG00000105499.12	-0.0519757	0.232332
ENSG00000105523.3	0.010183	0.30874
ENSG00000105552.13	-0.0005881	0.736628
ENSG00000105576.14	-0.000947643	0.896293
ENSG00000105583.8	-0.00973919	0.0527339
ENSG00000105605.6	0.0349251	0.514182
ENSG00000105607.11	0.00733988	0.469591
ENSG00000105609.15	-0.0735128	0.178751
ENSG00000105639.17	-0.0143071	0.178895
ENSG00000105642.14	-0.0771961	0.588445
ENSG00000105643.8	-0.00998649	0.357353
ENSG00000105647.13	-0.0955272	0.533015
ENSG00000105650.20	-0.046463	0.297758
ENSG00000105655.17	-0.00244679	0.244543
ENSG00000105656.11	-0.0200187	0.406521
ENSG00000105668.6	-0.000265881	0.667196
ENSG00000105672.13	-0.0511661	0.596965
ENSG00000105695.13	-0.973605	0.457366
ENSG00000105697.6	-0.364252	0.083226
ENSG00000105698.14	-0.00455957	0.322419
ENSG00000105699.15	0.00033976	0.775203
ENSG00000105700.9	-0.00806072	0.477895
ENSG00000105701.14	-0.00257054	0.165786
ENSG00000105707.12	0.0136001	0.76217
ENSG00000105711.9	-0.0770367	0.172544
ENSG00000105717.12	-0.0421989	0.335878
ENSG00000105726.15	-0.0070086	0.255884
ENSG00000105737.8	0.0275168	0.572349
ENSG00000105755.6	-0.0024327	0.627727
ENSG00000105767.2	0.002044	0.707092
ENSG00000105792.18	0.0301697	0.204648
ENSG00000105808.16	-0.228365	0.472427
ENSG00000105829.10	-0.0220015	0.443596
ENSG00000105852.9	0.00285171	0.947527
ENSG00000105854.11	0.00305563	0.478871
ENSG00000105856.12	0.0040923	0.57337
ENSG00000105880.4	0.0127272	0.335521
ENSG00000105894.10	-0.00131724	0.476971
ENSG00000105939.11	0.00728146	0.0758484
ENSG00000105953.13	0.000835284	0.766132
ENSG00000105996.6	-0.209862	0.195617
ENSG00000105997.21	-0.0342902	0.311501
ENSG00000106004.4	0.00398776	0.799881
ENSG00000106006.6	-0.155112	0.355609
ENSG00000106066.12	-0.00508476	0.567522
ENSG00000106077.17	-0.00673351	0.236175
ENSG00000106123.10	-0.000628227	0.636225
ENSG00000106153.12	-0.00110901	0.59835
ENSG00000106258.12	0.0035818	0.29996
ENSG00000106261.15	0.00549002	0.251594
ENSG00000106330.10	-0.0225853	0.223779
ENSG00000106333.11	-0.00244061	0.475365
ENSG00000106336.11	-0.0274635	0.945024
ENSG00000106351.11	0.0012589	0.9215
ENSG00000106384.9	0.0792559	0.172798
ENSG00000106392.9	0.00353975	0.662243
ENSG00000106479.9	0.0237178	0.118628
ENSG00000106484.13	-0.0028342	0.393593
ENSG00000106511.5	-0.22771	0.135897
ENSG00000106537.7	0.00120946	0.721194
ENSG00000106609.15	-0.000667024	0.90329
ENSG00000106615.8	0.00430593	0.515921
ENSG00000106628.9	-0.000231275	0.943641
ENSG00000106631.7	-0.50191	0.492159
ENSG00000106633.14	-0.426031	0.432323
ENSG00000106682.13	-0.00217036	0.436401
ENSG00000106701.10	0.0256347	0.598865
ENSG00000106771.11	0.00196056	0.742943
ENSG00000106785.13	-0.00150757	0.805443
ENSG00000106789.11	-0.00106345	0.819752
ENSG00000106809.9	0.015759	0.408702
ENSG00000106823.11	0.0105665	0.76111
ENSG00000106868.15	0.015717	0.136942
ENSG00000106927.10	-0.261008	0.160117
ENSG00000106948.15	-0.0152185	0.125993
ENSG00000106992.16	0.0320337	0.224758
ENSG00000107020.8	-0.0233312	0.198453
ENSG00000107021.14	0.0123272	0.214762
ENSG00000107159.11	-0.00154524	0.648207
ENSG00000107187.14	-0.66195	0.775102
ENSG00000107281.8	-0.00949233	0.108576
ENSG00000107317.10	-0.00777859	0.225843
ENSG00000107331.15	-0.0106262	0.151548
ENSG00000107404.16	-0.00786206	0.0910125
ENSG00000107438.7	-0.00162891	0.203568
ENSG00000107521.17	0.00345308	0.657751
ENSG00000107537.12	-0.00371291	0.655765
ENSG00000107566.12	-0.00178085	0.8017
ENSG00000107593.16	0.254607	0.0092077
ENSG00000107611.13	0.075578	0.649326
ENSG00000107614.20	0.115554	0.148787
ENSG00000107625.11	-0.00864719	0.574024
ENSG00000107672.13	-0.00870276	0.636698
ENSG00000107738.18	-0.00516327	0.301144
ENSG00000107742.11	-0.0193974	0.0553885
ENSG00000107829.12	-0.00375325	0.592302
ENSG00000107874.9	-0.00978286	0.397022
ENSG00000107902.12	-0.00531455	0.695467
ENSG00000107951.11	0.00737335	0.731073
ENSG00000107960.9	-0.00129365	0.893653
ENSG00000108187.14	0.0715073	0.0132528
ENSG00000108219.13	-0.000380212	0.825738
ENSG00000108262.14	-0.00287523	0.515251
ENSG00000108309.11	-0.00589386	0.867363
ENSG00000108344.13	0.00202829	0.447487
ENSG00000108349.13	0.00465951	0.0688424
ENSG00000108352.10	0.00218389	0.0991884
ENSG00000108375.11	0.0143575	0.0969819
ENSG00000108387.13	0.0169462	0.683357
ENSG00000108389.8	0.00636516	0.119975
ENSG00000108405.3	-0.0160035	0.425371
ENSG00000108417.3	-0.0177487	0.907942
ENSG00000108448.19	-0.0171089	0.468904
ENSG00000108468.13	0.00516806	0.248675
ENSG00000108506.10	0.0349416	0.0246902
ENSG00000108511.9	-0.0086698	0.361329
ENSG00000108557.16	-0.00171297	0.717779
ENSG00000108578.13	-0.0025916	0.730366
ENSG00000108582.10	0.0025578	0.293673
ENSG00000108587.13	-0.00398523	0.721601
ENSG00000108588.12	0.0043623	0.0688655
ENSG00000108592.15	0.000281595	0.957415
ENSG00000108599.13	0.00494411	0.804145
ENSG00000108604.14	0.00106088	0.657766
ENSG00000108622.9	-0.0486315	0.162974
ENSG00000108639.6	-0.000980425	0.558589
ENSG00000108651.8	-0.0125564	0.24984
ENSG00000108654.10	-0.000179473	0.818397
ENSG00000108669.15	-0.000151616	0.974163
ENSG00000108671.8	0.00314129	0.00154062
ENSG00000108684.13	0.361259	0.640104
ENSG00000108784.8	0.00105719	0.897526
ENSG00000108785.7	0.230823	0.010331
ENSG00000108786.9	0.00421719	0.125185
ENSG00000108788.10	-0.00648281	0.570535
ENSG00000108799.11	-0.00608285	0.680215
ENSG00000108819.10	0.00351552	0.0751898
ENSG00000108821.12	2.2947e-05	0.318006
ENSG00000108829.9	0.00135994	0.513478
ENSG00000108840.14	0.00887133	0.226625
ENSG00000108846.14	0.00164223	0.180519
ENSG00000108861.7	-0.0023601	0.720538
ENSG00000108946.13	0.00321113	0.156159
ENSG00000108947.4	-0.00768826	0.76241
ENSG00000108963.16	-0.0647376	0.0303661
ENSG00000108984.12	-0.00462685	0.924991
ENSG00000109047.7	0.432409	0.830905
ENSG00000109061.9	-0.227446	0.742363
ENSG00000109063.13	0.0549967	0.00153987
ENSG00000109089.7	0.0109287	0.0231007
ENSG00000109099.12	-0.0024059	0.488378
ENSG00000109101.6	0.0192591	0.00376777
ENSG00000109107.12	-0.00241165	0.69025
ENSG00000109118.12	-0.000907072	0.922841
ENSG00000109181.10	0.10333	0.16991
ENSG00000109184.13	0.0186727	0.226948
ENSG00000109255.10	0.0256855	0.00946518
ENSG00000109270.11	0.00326049	0.8052
ENSG00000109272.3	0.185526	0.10818
ENSG00000109458.7	0.0370677	0.0157146
ENSG00000109654.13	0.00607193	0.204516
ENSG00000109686.15	0.00942328	0.233397
ENSG00000109705.7	0.174996	0.11576
ENSG00000109743.9	0.0146706	0.0517352
ENSG00000109758.7	-0.644685	0.24763
ENSG00000109790.15	0.0100318	0.335325
ENSG00000109854.12	-0.00340772	0.592908
ENSG00000109881.15	-0.0252429	0.19502
ENSG00000109906.12	-0.0276773	0.612856
ENSG00000109917.9	-0.00868685	0.421772
ENSG00000109919.8	-0.0038947	0.565619
ENSG00000109920.11	-0.00638401	0.413429
ENSG00000109943.7	-0.102184	0.376387
ENSG00000109944.9	0.122343	0.0114416
ENSG00000109971.12	8.87665e-05	0.806764
ENSG00000110011.12	-0.016201	0.137644
ENSG00000110047.16	-0.0109539	0.0264173
ENSG00000110075.13	-9.7929e-05	0.985318
ENSG00000110076.17	-0.0556594	0.441833
ENSG00000110090.11	-0.00962873	0.0988336
ENSG00000110169.9	-0.0388177	0.78559
ENSG00000110171.17	-0.00784801	0.866457
ENSG00000110200.7	-0.0361733	0.339773
ENSG00000110237.3	0.00612294	0.408115
ENSG00000110243.10	-0.631029	0.681668
ENSG00000110244.6	-0.700165	0.5786
ENSG00000110245.10	-0.350994	0.192932
ENSG00000110330.7	-0.00239829	0.542226
ENSG00000110344.8	0.0201717	0.00240024
ENSG00000110455.12	0.00328232	0.800551
ENSG00000110492.14	-0.00016293	0.803412
ENSG00000110497.13	0.00876636	0.60307
ENSG00000110619.15	-0.0163791	0.0604519
ENSG00000110651.10	-0.00214259	0.0544226
ENSG00000110719.8	-0.00657837	0.0242113
ENSG00000110723.10	0.0425675	0.00998223
ENSG00000110786.16	-0.189501	0.592713
ENSG00000110799.12	0.00130984	0.458634
ENSG00000110811.18	0.00231071	0.605994
ENSG00000110841.12	0.00880616	0.0400641
ENSG00000110881.10	0.0296164	0.379237
ENSG00000110917.6	0.00104937	0.530169
ENSG00000110925.5	-0.010024	0.435999
ENSG00000110934.9	-0.0323846	0.20874
ENSG00000110955.7	-0.000803757	0.377524
ENSG00000111046.3	-0.336037	0.852227
ENSG00000111077.16	-0.00552508	0.51718
ENSG00000111087.8	-0.0672175	0.449475
ENSG00000111181.11	0.0455238	0.266233
ENSG00000111196.8	-0.0201479	0.336026
ENSG00000111229.14	-0.00602476	0.00391639
ENSG00000111266.7	-0.0006744	0.895331
ENSG00000111269.2	-0.0166601	0.127409
ENSG00000111276.9	-0.00918113	0.253712
ENSG00000111300.8	-0.0179008	0.218073
ENSG00000111319.11	-0.000948976	0.46169
ENSG00000111321.9	-0.00385523	0.0706478
ENSG00000111331.11	-1.3892e-05	0.990106
ENSG00000111335.11	-0.00049562	0.713729
ENSG00000111348.7	-0.00707945	0.000284064
ENSG00000111405.7	0.256843	0.0918974
ENSG00000111424.9	-0.00104574	0.8605
ENSG00000111445.12	-0.0106317	0.460893
ENSG00000111490.11	0.0127221	0.328594
ENSG00000111602.10	0.000579858	0.931075
ENSG00000111615.11	-0.0240925	0.0987985
ENSG00000111641.9	-0.0158792	0.0498967
ENSG00000111642.13	0.000366419	0.879974
ENSG00000111644.6	-0.00484923	0.928635
ENSG00000111652.8	-0.0117577	0.0716089
ENSG00000111664.9	-0.00310897	0.978322
ENSG00000111669.13	-0.00122395	0.0864551
ENSG00000111670.13	-0.0100662	0.243004
ENSG00000111676.13	-0.00307672	0.250382
ENSG00000111679.15	-0.016297	0.0109266
ENSG00000111684.9	0.00509326	0.659068
ENSG00000111716.11	-0.000754901	0.257598
ENSG00000111801.14	-0.0125308	0.192815
ENSG00000111837.10	0.103257	0.120289
ENSG00000111846.14	-0.00731997	0.699021
ENSG00000111850.9	0.126707	0.00688585
ENSG00000111860.12	-0.037389	0.417675
ENSG00000111911.6	0.00872652	0.585364
ENSG00000111981.4	0.137044	0.214121
ENSG00000112031.14	0.0836546	0.201347
ENSG00000112039.3	0.0103547	0.506797
ENSG00000112159.10	0.0112977	0.183191
ENSG00000112195.8	0.000563267	0.993985
ENSG00000112200.15	0.0163171	0.0497525
ENSG00000112208.11	-0.00107604	0.936059
ENSG00000112212.10	-0.200051	0.752785
ENSG00000112242.13	0.000466512	0.822473
ENSG00000112299.7	-0.00218486	0.874179
ENSG00000112303.12	-0.0833658	0.241904
ENSG00000112308.11	0.000435172	0.78269
ENSG00000112319.16	0.0815616	0.121292
ENSG00000112343.10	0.0125516	0.0966379
ENSG00000112357.11	-0.0382123	0.493448
ENSG00000112486.13	-1.52711	0.326421
ENSG00000112494.8	0.149635	0.0641079
ENSG00000112499.11	-0.569525	0.635384
ENSG00000112511.16	-0.01841	0.0602446
ENSG00000112584.12	0.0306768	0.101222
ENSG00000112640.13	-0.00742735	0.394714
ENSG00000112655.14	0.000375559	0.733955
ENSG00000112658.7	-0.00911976	0.215975
ENSG00000112667.11	-0.00796519	0.414704
ENSG00000112701.16	0.00628374	0.4835
ENSG00000112759.15	0.000665957	0.758549
ENSG00000112763.14	-0.0353851	0.0532505
ENSG00000112852.6	0.0278435	0.108914
ENSG00000112874.8	0.0164799	0.133421
ENSG00000112893.8	0.0177325	0.00626107
ENSG00000112941.11	0.00444704	0.593673
ENSG00000112964.12	0.0432794	0.0375603
ENSG00000113070.7	-0.00149781	0.634168
ENSG00000113088.5	-0.0425793	0.328139
ENSG00000113194.11	0.0115969	0.205757
ENSG00000113196.2	-0.107766	0.600002
ENSG00000113205.4	0.0255908	0.691638
ENSG00000113209.8	-0.017953	0.544425
ENSG00000113211.5	0.0282488	0.156867
ENSG00000113212.6	0.0489155	0.246292
ENSG00000113262.13	0.0358763	0.564413
ENSG00000113269.12	-0.00343532	0.646422
ENSG00000113272.12	-0.0366802	0.262716
ENSG00000113273.14	0.00434679	0.873556
ENSG00000113300.10	0.0167606	0.0672865
ENSG00000113312.9	0.00615035	0.631032
ENSG00000113387.10	-0.0003684	0.887397
ENSG00000113460.11	0.000308939	0.96466
ENSG00000113520.9	-0.469761	0.844109
ENSG00000113552.14	0.00479443	0.156527
ENSG00000113569.14	0.00804425	0.138637
ENSG00000113594.8	-0.00442391	0.686118
ENSG00000113600.9	0.182359	0.60788
ENSG00000113621.13	-0.00865521	0.532045
ENSG00000113638.11	0.0400808	0.316692
ENSG00000113643.7	0.0020526	0.789845
ENSG00000113658.15	0.00573949	0.00205167
ENSG00000113716.11	0.0162552	0.0799064
ENSG00000113719.14	0.000370365	0.932122
ENSG00000113722.15	0.00897278	0.174423
ENSG00000113732.7	-0.00212713	0.527274
ENSG00000113758.12	0.00139278	0.576556
ENSG00000113811.9	-0.0222068	0.0694743
ENSG00000113812.12	-0.00646387	0.791835
ENSG00000113851.12	-0.00024048	0.988441
ENSG00000113889.10	-0.140509	0.451251
ENSG00000113905.4	-0.34882	0.258806
ENSG00000113966.8	0.0969305	0.458838
ENSG00000114019.13	0.0104371	0.0086331
ENSG00000114021.10	0.00302256	0.669032
ENSG00000114026.20	-0.00410315	0.785435
ENSG00000114030.11	0.017198	0.0978257
ENSG00000114126.16	0.0219656	0.00427829
ENSG00000114127.9	0.0151192	0.0510679
ENSG00000114251.12	0.000155818	0.848207
ENSG00000114268.10	-0.00838594	0.488549
ENSG00000114270.14	-0.000644962	0.337148
ENSG00000114315.3	-0.00498587	0.0426081
ENSG00000114331.11	0.0149096	0.0287745
ENSG00000114349.8	0.565128	0.366721
ENSG00000114353.15	-0.00318152	0.0505217
ENSG00000114374.11	-0.00431152	0.691638
ENSG00000114378.15	-0.00182536	0.952964
ENSG00000114383.8	-0.0213004	0.168653
ENSG00000114391.11	-0.000279037	0.630606
ENSG00000114491.12	0.00846355	0.297994
ENSG00000114520.9	0.0153225	0.160932
ENSG00000114529.11	0.0158935	0.0431964
ENSG00000114544.14	0.00364811	0.612967
ENSG00000114626.16	-0.00537823	0.518517
ENSG00000114646.8	0.0204345	0.443262
ENSG00000114654.7	-0.0564759	0.483382
ENSG00000114686.7	0.00251502	0.648292
ENSG00000114744.7	0.0211291	0.112906
ENSG00000114770.15	0.00117473	0.296119
ENSG00000114771.12	0.00366152	0.660238
ENSG00000114854.6	-0.00443509	0.569791
ENSG00000114867.18	0.00116579	0.21627
ENSG00000114904.11	7.87171e-06	0.999639
ENSG00000114956.18	-0.0152649	0.10005
ENSG00000114993.14	-0.000672534	0.912576
ENSG00000115008.5	-0.0046631	0.232191
ENSG00000115009.10	-0.0106441	0.338537
ENSG00000115041.11	0.0171522	0.758984
ENSG00000115053.14	-0.000269867	0.706039
ENSG00000115204.13	-0.0109241	0.341563
ENSG00000115226.8	0.0047494	0.744595
ENSG00000115266.10	0.0128648	0.664448
ENSG00000115268.8	-0.00126887	0.203895
ENSG00000115275.10	-0.006775	0.243062
ENSG00000115286.18	-0.00722945	0.386621
ENSG00000115289.11	-0.0414808	0.136411
ENSG00000115318.10	-0.0208503	0.679123
ENSG00000115364.12	-0.0148824	0.258363
ENSG00000115504.13	0.000274164	0.977971
ENSG00000115507.8	0.0814589	0.108022
ENSG00000115520.7	-0.0106639	0.56085
ENSG00000115524.14	0.00100015	0.599488
ENSG00000115590.12	-0.00111719	0.950197
ENSG00000115594.10	0.00775679	0.00276415
ENSG00000115596.3	0.0131451	0.475841
ENSG00000115598.8	0.0608702	0.150013
ENSG00000115607.8	-0.169206	0.227801
ENSG00000115648.12	-0.00648099	0.0948934
ENSG00000115649.14	0.00381043	0.512683
ENSG00000115657.11	-0.0285819	0.505482
ENSG00000115750.15	0.0218779	0.243901
ENSG00000115760.12	0.0077959	0.0151061
ENSG00000115808.10	0.0200325	0.0877299
ENSG00000115841.18	0.120088	0.0282399
ENSG00000115850.8	0.222783	0.761409
ENSG00000115902.9	0.0019334	0.766104
ENSG00000115904.11	-0.00141023	0.845305
ENSG00000115935.15	-0.00751872	0.171055
ENSG00000115998.6	0.0466127	0.514145
ENSG00000116001.14	0.000570178	0.878795
ENSG00000116014.8	-0.875391	0.130064
ENSG00000116017.9	0.00280314	0.515466
ENSG00000116030.15	-0.00589737	0.34281
ENSG00000116031.8	0.0282692	0.503732
ENSG00000116032.5	-0.217949	0.358657
ENSG00000116035.2	0.0565468	0.580813
ENSG00000116039.10	0.0665776	0.0305627
ENSG00000116095.9	0.0470047	0.0529814
ENSG00000116161.16	-0.000831593	0.888151
ENSG00000116176.6	-1.83747	0.176407
ENSG00000116199.10	0.00185647	0.756597
ENSG00000116251.8	-0.00406852	0.0470245
ENSG00000116254.16	-0.00785962	0.94674
ENSG00000116266.9	-0.0252577	0.125484
ENSG00000116396.12	0.0255171	0.333219
ENSG00000116478.10	-0.00549882	0.108506
ENSG00000116489.11	-0.00263635	0.374754
ENSG00000116525.12	-0.0290323	0.151812
ENSG00000116544.10	-0.0111741	0.896962
ENSG00000116584.16	0.00283772	0.590762
ENSG00000116604.16	0.00160401	0.859101
ENSG00000116649.8	-0.00330333	0.428811
ENSG00000116675.14	-0.00715065	0.915385
ENSG00000116678.17	0.038796	0.14321
ENSG00000116685.14	-0.0141324	0.0541291
ENSG00000116688.15	-0.00417381	0.259363
ENSG00000116691.9	-0.0138489	0.176121
ENSG00000116729.12	0.0050004	0.0841546
ENSG00000116741.7	-0.00414468	0.381471
ENSG00000116748.18	-2.50013	0.0764472
ENSG00000116752.5	-0.013342	0.378227
ENSG00000116761.10	-0.0311688	0.683095
ENSG00000116771.5	0.0190621	0.40668
ENSG00000116786.10	0.00499895	0.382385
ENSG00000116815.14	-0.0159828	0.533106
ENSG00000116857.15	0.00273317	0.55125
ENSG00000116885.17	-0.120396	0.112208
ENSG00000116898.10	-0.00996046	0.127036
ENSG00000116957.11	-8.61796e-05	0.996657
ENSG00000116962.13	0.000898902	0.669966
ENSG00000117000.8	0.0109563	0.360933
ENSG00000117016.8	0.0336944	0.355399
ENSG00000117069.13	-0.0404252	0.364683
ENSG00000117118.8	-0.0144559	0.109611
ENSG00000117122.12	0.000277897	0.925609
ENSG00000117148.7	-0.0348165	0.530816
ENSG00000117153.14	0.00575784	0.658208
ENSG00000117154.10	-0.135647	0.216381
ENSG00000117155.15	0.0206814	0.212718
ENSG00000117222.12	0.0212118	0.000817579
ENSG00000117245.11	-0.0767798	0.532073
ENSG00000117305.13	-0.00243622	0.803503
ENSG00000117308.13	-0.00403534	0.368253
ENSG00000117318.8	-0.00117467	0.552574
ENSG00000117322.15	-0.00137853	0.580875
ENSG00000117360.11	-0.00472408	0.540412
ENSG00000117407.15	-0.0158309	0.53132
ENSG00000117410.12	-0.00365	0.262519
ENSG00000117411.15	-0.000599797	0.888218
ENSG00000117425.12	-0.181796	0.285591
ENSG00000117481.9	-0.017887	0.454408
ENSG00000117533.13	0.0174132	0.225629
ENSG00000117586.9	-0.0461714	0.372467
ENSG00000117594.8	0.0291644	0.181188
ENSG00000117595.9	0.000454929	0.395221
ENSG00000117682.15	-0.00360172	0.81013
ENSG00000117713.16	-0.00345049	0.429136
ENSG00000117751.16	-0.0180456	0.245933
ENSG00000117758.12	-0.0191493	0.175364
ENSG00000117791.14	-0.0536055	0.170912
ENSG00000117859.17	-0.0013931	0.843215
ENSG00000117899.9	-0.000575802	0.946752
ENSG00000117971.10	0.0479424	0.715124
ENSG00000118017.3	3.14766	0.0439902
ENSG00000118094.10	0.156253	0.315209
ENSG00000118113.10	-0.0622804	0.916202
ENSG00000118156.11	-0.0181609	0.743885
ENSG00000118160.12	0.0230492	0.794407
ENSG00000118200.13	0.0161673	6.96659e-06
ENSG00000118242.14	0.0135597	0.229958
ENSG00000118292.7	-0.113593	0.0415426
ENSG00000118402.5	0.0529241	0.032309
ENSG00000118412.11	0.023403	0.143208
ENSG00000118473.20	-0.00849019	0.891158
ENSG00000118496.4	0.0170407	0.471059
ENSG00000118620.11	-0.02334	0.510085
ENSG00000118762.6	-0.00631426	0.726011
ENSG00000118816.8	-0.00283228	0.143159
ENSG00000118873.14	0.00492493	0.509381
ENSG00000118961.13	0.0272679	0.0666039
ENSG00000119041.9	0.00912084	0.523339
ENSG00000119231.9	0.0215457	0.0496147
ENSG00000119326.13	0.00170359	0.830537
ENSG00000119333.10	0.00105633	0.705056
ENSG00000119335.15	0.000506682	0.638285
ENSG00000119392.13	0.00590368	0.510152
ENSG00000119403.12	0.00152944	0.809835
ENSG00000119414.10	6.61165e-05	0.993775
ENSG00000119431.8	0.00810922	0.358977
ENSG00000119535.16	0.000941853	0.873787
ENSG00000119547.5	0.00508368	0.092123
ENSG00000119559.14	-0.00838285	0.581946
ENSG00000119574.11	-0.027082	0.380724
ENSG00000119640.7	-0.0373319	0.340988
ENSG00000119673.13	0.00611279	0.815774
ENSG00000119681.10	-0.000341777	0.871438
ENSG00000119684.14	0.0350719	0.196126
ENSG00000119689.13	-0.00480755	0.407279
ENSG00000119718.9	-0.00545453	0.712403
ENSG00000119737.5	0.0778601	0.669041
ENSG00000119777.17	-0.00483326	0.271894
ENSG00000119820.9	0.00247423	0.798073
ENSG00000119919.10	-1.65543	0.385172
ENSG00000119922.8	0.00299834	0.392229
ENSG00000119943.9	-0.00557282	0.679194
ENSG00000119977.19	0.00301904	0.846254
ENSG00000120029.11	0.0212522	0.291083
ENSG00000120049.17	-0.0611316	0.692494
ENSG00000120068.6	-0.0133713	0.279206
ENSG00000120075.5	-0.0223152	0.240931
ENSG00000120088.13	-0.480834	0.465624
ENSG00000120093.10	-0.0045509	0.372741
ENSG00000120094.6	-0.216322	0.49597
ENSG00000120129.5	-0.000360785	0.642954
ENSG00000120156.19	-0.0101959	0.820195
ENSG00000120160.9	-2.50692	0.351797
ENSG00000120210.6	0.0831124	0.22864
ENSG00000120306.8	0.00336947	0.32273
ENSG00000120318.14	0.00252432	0.689978
ENSG00000120322.3	0.0971281	0.00509746
ENSG00000120324.6	0.164435	0.0123537
ENSG00000120327.6	0.0459541	0.0168225
ENSG00000120328.6	0.277251	0.00222072
ENSG00000120437.8	0.00455419	0.549703
ENSG00000120440.12	0.582516	0.679017
ENSG00000120451.9	0.00995276	0.172921
ENSG00000120669.14	-0.128315	0.254304
ENSG00000120686.10	-0.00165394	0.826093
ENSG00000120693.12	0.0157023	0.293745
ENSG00000120696.8	0.0709552	0.00195145
ENSG00000120697.7	-0.0275017	0.0870267
ENSG00000120709.9	0.012422	0.338138
ENSG00000120727.11	0.00759326	0.486695
ENSG00000120733.12	0.00752706	0.203987
ENSG00000120738.7	-0.00116468	0.279741
ENSG00000120784.14	0.0429869	0.24376
ENSG00000120875.7	-0.00391812	0.27314
ENSG00000120910.13	-0.0348582	0.265725
ENSG00000120913.22	0.00133936	0.938423
ENSG00000120937.8	-3.4401	0.231806
ENSG00000120948.14	-0.0124565	0.0859251
ENSG00000120963.10	-0.00159121	0.536523
ENSG00000121089.4	-0.109702	0.412404
ENSG00000121152.8	-0.00785782	0.582446
ENSG00000121210.14	-0.00161438	0.848166
ENSG00000121211.6	0.00481991	0.898338
ENSG00000121236.18	-0.018865	0.407031
ENSG00000121318.2	2.02385	0.0350376
ENSG00000121335.11	-0.169578	0.732226
ENSG00000121361.3	-0.0138517	0.649746
ENSG00000121406.7	0.00694605	0.884829
ENSG00000121413.11	0.00225538	0.826611
ENSG00000121417.12	-0.00110239	0.926961
ENSG00000121446.16	1.09099	0.357758
ENSG00000121542.10	0.0433811	0.073285
ENSG00000121552.3	0.000684931	0.563326
ENSG00000121570.11	-0.225725	0.805299
ENSG00000121653.10	-0.0531292	0.178821
ENSG00000121671.10	-0.0121791	0.564127
ENSG00000121680.14	-0.0267208	0.102622
ENSG00000121690.8	0.00221019	0.914206
ENSG00000121691.4	0.000797	0.840602
ENSG00000121716.17	0.00165577	0.940179
ENSG00000121775.16	-0.0286591	0.272953
ENSG00000121807.5	0.0160689	0.213052
ENSG00000121864.8	0.0081194	0.664158
ENSG00000121903.13	0.167268	0.214574
ENSG00000121904.16	0.0856478	0.0206258
ENSG00000121940.14	-0.0298755	0.393684
ENSG00000122012.12	-0.076433	0.587884
ENSG00000122068.11	0.00399664	0.45068
ENSG00000122085.15	-0.0425157	0.179064
ENSG00000122133.15	0.0218393	0.450523
ENSG00000122176.10	0.000254087	0.942343
ENSG00000122194.17	-0.567074	0.314318
ENSG00000122367.18	-0.0651625	0.428073
ENSG00000122375.10	0.875239	0.509018
ENSG00000122386.9	-0.020907	0.362624
ENSG00000122406.11	-0.00116168	0.0638317
ENSG00000122417.14	-0.00696996	0.430024
ENSG00000122477.11	0.063897	0.75158
ENSG00000122490.17	-0.00331416	0.638682
ENSG00000122547.9	0.0056076	0.669055
ENSG00000122642.9	0.00609991	0.0763139
ENSG00000122694.14	-0.0144006	0.147839
ENSG00000122756.13	-0.0126097	0.70487
ENSG00000122877.12	-0.0173217	0.372264
ENSG00000122884.11	-0.00598956	0.168959
ENSG00000122912.13	0.029194	0.0478903
ENSG00000122958.13	-0.00184774	0.790465
ENSG00000122971.7	-0.0138828	0.337811
ENSG00000122986.12	-0.0914133	0.136285
ENSG00000123144.9	-0.00844437	0.0477913
ENSG00000123159.14	-0.00196423	0.228548
ENSG00000123178.13	-0.0115048	0.649595
ENSG00000123201.13	0.0709463	0.161798
ENSG00000123268.7	0.0061297	0.697148
ENSG00000123297.15	-0.0177196	0.304013
ENSG00000123307.3	-0.165096	0.675466
ENSG00000123338.11	-0.0153045	0.0988069
ENSG00000123342.14	0.00523867	0.50875
ENSG00000123349.12	-0.00436961	0.053783
ENSG00000123352.16	0.0220397	0.122737
ENSG00000123358.18	-0.00106587	0.449217
ENSG00000123360.10	-0.126051	0.0709585
ENSG00000123384.12	0.00156727	0.0225696
ENSG00000123388.4	0.0318494	0.468637
ENSG00000123395.13	-0.0144454	0.34218
ENSG00000123407.3	0.309555	0.000260782
ENSG00000123411.13	0.0200213	0.620897
ENSG00000123416.14	-0.000590126	0.680697
ENSG00000123453.15	-0.0489976	0.513566
ENSG00000123584.7	-0.113573	0.490969
ENSG00000123595.6	0.00580619	0.618125
ENSG00000123609.9	-0.00679488	0.4113
ENSG00000123689.5	-0.00850973	0.260748
ENSG00000123739.9	0.0133722	0.331673
ENSG00000123838.9	-0.295965	0.315214
ENSG00000123843.11	0.0271864	0.579331
ENSG00000123870.10	0.0992631	0.154066
ENSG00000123933.13	-0.00651658	0.308853
ENSG00000123975.4	-0.00143719	0.821844
ENSG00000123999.4	0.0656065	0.227739
ENSG00000124006.13	0.00571304	0.134439
ENSG00000124067.15	0.00802909	0.042629
ENSG00000124092.11	-0.184698	0.620648
ENSG00000124097.7	0.088265	0.7734
ENSG00000124103.8	-0.744864	0.667666
ENSG00000124134.7	-0.0236038	0.617277
ENSG00000124143.9	0.000982492	0.915257
ENSG00000124155.15	-0.000643265	0.750328
ENSG00000124157.6	-0.181833	0.527169
ENSG00000124193.13	0.000575856	0.717979
ENSG00000124222.20	-0.00098302	0.865057
ENSG00000124226.9	-0.00333522	0.606748
ENSG00000124256.13	-0.0357541	0.198992
ENSG00000124257.6	-0.150594	0.720893
ENSG00000124313.11	0.00771104	0.671988
ENSG00000124333.13	0.00758072	0.39743
ENSG00000124356.14	-0.00643779	0.625335
ENSG00000124391.4	-0.0361505	0.734185
ENSG00000124440.14	0.019299	0.171951
ENSG00000124466.8	0.00111248	0.0235644
ENSG00000124486.11	0.00523133	0.0364961
ENSG00000124496.11	-0.00701487	0.42161
ENSG00000124508.15	-0.01883	0.322348
ENSG00000124541.6	-0.00586967	0.455965
ENSG00000124549.13	0.000725892	0.99389
ENSG00000124564.16	-0.291858	0.664506
ENSG00000124568.9	0.606958	0.00682619
ENSG00000124587.12	-0.00991723	0.244264
ENSG00000124588.18	-0.017587	0.198161
ENSG00000124593.13	-0.0203054	0.227685
ENSG00000124608.4	-0.00927305	0.613834
ENSG00000124657.1	-0.292567	0.344611
ENSG00000124701.5	0.168963	0.150697
ENSG00000124762.12	-5.44404e-06	0.995856
ENSG00000124766.5	-0.000722563	0.490879
ENSG00000124795.13	2.24584e-05	0.987265
ENSG00000124802.10	-0.0861521	0.01095
ENSG00000124831.17	0.000129234	0.968802
ENSG00000124875.8	0.00302486	0.492522
ENSG00000124920.12	-0.0105043	0.487542
ENSG00000124942.12	0.000133038	0.72228
ENSG00000125046.13	0.275572	0.418842
ENSG00000125084.10	0.0187615	0.982315
ENSG00000125089.15	-0.00436975	0.478997
ENSG00000125148.6	-8.56503e-05	0.800381
ENSG00000125149.10	0.0411154	0.0330482
ENSG00000125249.6	0.0207418	0.0590004
ENSG00000125257.12	0.00306544	0.664697
ENSG00000125266.6	0.00150014	0.404981
ENSG00000125319.13	-0.00470401	0.895301
ENSG00000125347.12	-0.0045892	0.0389812
ENSG00000125351.9	0.0119891	0.571201
ENSG00000125378.14	0.00063072	0.931113
ENSG00000125414.17	-0.290741	0.730391
ENSG00000125434.9	0.0193162	0.216061
ENSG00000125449.5	-0.0065234	0.584792
ENSG00000125498.18	0.0666281	0.91248
ENSG00000125503.11	-0.0127233	0.0718568
ENSG00000125520.12	-0.00668505	0.171474
ENSG00000125551.17	-3.87378	0.455018
ENSG00000125611.14	-0.0409205	0.0553184
ENSG00000125630.14	-0.0217177	0.212729
ENSG00000125637.14	-0.00193467	0.674596
ENSG00000125648.13	-0.00593083	0.472765
ENSG00000125650.4	0.017867	0.89081
ENSG00000125691.11	-0.000343829	0.414876
ENSG00000125730.15	-0.00140755	0.0333015
ENSG00000125735.9	-0.0748884	0.352393
ENSG00000125741.4	0.00837828	0.560324
ENSG00000125744.10	-0.0299499	0.241611
ENSG00000125746.13	-0.0101035	0.0783442
ENSG00000125753.12	-0.00535475	0.0339748
ENSG00000125787.10	-0.111377	0.68688
ENSG00000125798.13	0.0172874	0.21531
ENSG00000125810.9	0.00336073	0.335683
ENSG00000125820.5	0.0729054	0.749813
ENSG00000125821.10	-0.0105308	0.323579
ENSG00000125826.18	-0.00592241	0.112355
ENSG00000125835.16	-0.00207077	0.185922
ENSG00000125841.11	0.0105655	0.263058
ENSG00000125843.9	0.0171327	0.544779
ENSG00000125900.11	-7.20901	0.0997711
ENSG00000125901.5	-0.00987685	0.0927522
ENSG00000125910.5	-0.0819008	0.176272
ENSG00000125912.9	-0.00664143	0.173032
ENSG00000125952.17	-0.00951276	0.353974
ENSG00000125966.9	0.0100361	0.224432
ENSG00000125971.15	9.91236e-05	0.967395
ENSG00000125998.7	0.0111481	0.0311005
ENSG00000126005.14	0.00496589	0.245272
ENSG00000126012.10	0.00471207	0.19094
ENSG00000126062.3	-0.00324993	0.720831
ENSG00000126091.18	0.0310853	0.376748
ENSG00000126217.19	0.000221225	0.965531
ENSG00000126218.10	0.0420259	0.630356
ENSG00000126231.12	0.468553	0.314595
ENSG00000126233.1	-0.00366901	0.741126
ENSG00000126243.7	0.008188	0.676538
ENSG00000126246.8	-0.181284	0.0837056
ENSG00000126254.10	-0.00227462	0.618394
ENSG00000126266.3	-3.66341	0.290503
ENSG00000126267.7	-0.000743746	0.610659
ENSG00000126337.12	0.0451996	0.000917014
ENSG00000126391.12	0.00218474	0.499951
ENSG00000126458.3	-0.0107171	0.108882
ENSG00000126467.9	-0.0185372	0.902015
ENSG00000126562.15	0.0303347	0.317167
ENSG00000126583.9	-0.0619131	0.651973
ENSG00000126602.9	0.00246381	0.77185
ENSG00000126653.14	0.000953194	0.940411
ENSG00000126698.9	-0.00900746	0.186847
ENSG00000126705.12	-0.00330395	0.720917
ENSG00000126709.13	0.000227513	0.482356
ENSG00000126746.16	-0.007891	0.719179
ENSG00000126752.7	-0.00604389	0.943409
ENSG00000126759.11	-0.0932472	0.300051
ENSG00000126767.16	-0.000608864	0.961671
ENSG00000126775.8	-0.00442124	0.858004
ENSG00000126787.11	-0.000653324	0.943313
ENSG00000126856.12	3.46063	0.297936
ENSG00000126860.10	-0.0746771	0.0636478
ENSG00000126861.4	0.1068	0.0579849
ENSG00000126878.11	-0.000810783	0.935258
ENSG00000126883.15	0.00709056	0.387443
ENSG00000126903.14	-0.00393213	0.585724
ENSG00000126950.7	0.0450599	0.0152951
ENSG00000126953.5	-0.0131196	0.74758
ENSG00000127022.13	0.000844251	0.369795
ENSG00000127080.8	0.031178	0.0648528
ENSG00000127081.12	0.132852	0.000449888
ENSG00000127083.7	0.0553242	0.162515
ENSG00000127191.16	-0.00463351	0.638625
ENSG00000127241.15	0.0699527	0.00794094
ENSG00000127311.8	0.0469323	0.350337
ENSG00000127324.7	0.00199089	0.585339
ENSG00000127337.5	-0.00605713	0.451698
ENSG00000127364.3	0.325359	0.034953
ENSG00000127366.5	0.1884	0.518646
ENSG00000127412.5	2.01947	0.175779
ENSG00000127511.8	0.00333464	0.553833
ENSG00000127527.12	0.00596413	0.688127
ENSG00000127533.3	-0.0514388	0.347904
ENSG00000127540.10	-0.0079391	0.213392
ENSG00000127578.6	0.0286225	0.736943
ENSG00000127580.14	-0.0211582	0.552873
ENSG00000127585.10	-0.0331834	0.537745
ENSG00000127603.22	0.0019873	0.0223905
ENSG00000127666.9	-0.00380865	0.746592
ENSG00000127804.11	-0.0220832	0.273473
ENSG00000127884.4	-0.00271265	0.209045
ENSG00000127920.5	0.000429122	0.972783
ENSG00000127928.11	0.242697	0.0776527
ENSG00000127946.15	0.00201185	0.79217
ENSG00000127957.15	0.0240904	0.824743
ENSG00000128000.14	0.00206897	0.873476
ENSG00000128016.5	-0.00122747	0.203861
ENSG00000128159.10	-0.00297751	0.675155
ENSG00000128191.12	0.00528337	0.547655
ENSG00000128218.7	-0.0356821	0.603499
ENSG00000128228.4	-0.0238528	0.0494998
ENSG00000128242.11	0.018534	0.205358
ENSG00000128245.13	-0.0047768	0.109578
ENSG00000128253.12	-0.0106912	0.981203
ENSG00000128268.11	-0.000694063	0.917837
ENSG00000128272.13	-0.00435223	0.0228394
ENSG00000128283.6	-0.00174081	0.528698
ENSG00000128294.14	0.001955	0.754427
ENSG00000128310.2	-0.596356	0.69333
ENSG00000128340.13	-0.0056703	0.177171
ENSG00000128394.15	-0.0661606	0.0783978
ENSG00000128422.14	6.26547e-05	0.0538446
ENSG00000128482.14	-0.00325765	0.978411
ENSG00000128510.9	-0.00177324	0.782285
ENSG00000128563.12	-0.00825139	0.508311
ENSG00000128564.6	-0.264437	0.0940431
ENSG00000128567.15	-0.00106315	0.676852
ENSG00000128578.8	0.00583871	0.791495
ENSG00000128591.14	-0.000184788	0.891067
ENSG00000128595.15	0.00260914	0.127543
ENSG00000128596.15	0.0152821	0.707596
ENSG00000128607.12	0.00865219	0.462769
ENSG00000128609.13	-0.00999215	0.325225
ENSG00000128610.10	0.0486897	0.442249
ENSG00000128655.15	0.109837	0.572056
ENSG00000128709.11	-0.00363523	0.883119
ENSG00000128710.5	0.0145391	0.399059
ENSG00000128713.12	0.0146399	0.730253
ENSG00000128714.5	0.00487631	0.82218
ENSG00000128739.19	-0.00636506	0.246923
ENSG00000128805.13	0.0124677	0.623918
ENSG00000128815.16	-0.0225831	0.286826
ENSG00000128849.10	-0.0253962	0.286011
ENSG00000128881.15	-0.0162488	0.704546
ENSG00000128928.7	-0.00816733	0.249331
ENSG00000128944.12	-0.0219948	0.187869
ENSG00000129103.16	0.00416789	0.119211
ENSG00000129158.9	-0.0958701	0.0328707
ENSG00000129167.8	-0.00755374	0.905486
ENSG00000129187.13	-0.00257638	0.738823
ENSG00000129204.15	-0.0672607	0.813127
ENSG00000129226.12	-0.181867	0.22932
ENSG00000129295.7	0.0242825	0.672328
ENSG00000129315.8	0.0250824	0.0836167
ENSG00000129347.18	-0.000331314	0.965102
ENSG00000129354.10	-0.0043348	0.251538
ENSG00000129355.6	-0.0324705	0.234854
ENSG00000129450.7	-0.15063	0.135013
ENSG00000129451.10	0.00130242	0.150417
ENSG00000129460.14	-0.0290257	0.16363
ENSG00000129480.11	0.0295204	0.361609
ENSG00000129636.11	0.0128927	0.125201
ENSG00000129646.12	0.0857384	0.00688445
ENSG00000129691.14	0.000387727	0.94148
ENSG00000129749.3	0.042035	0.867913
ENSG00000129757.11	0.00600774	0.0172786
ENSG00000129910.6	0.100643	0.7503
ENSG00000129911.7	-0.0188987	0.201885
ENSG00000129946.9	-0.0122028	0.504472
ENSG00000129988.5	-0.414948	0.116696
ENSG00000129991.11	-0.0575558	0.401967
ENSG00000129993.13	-0.0423209	0.291846
ENSG00000130005.10	-0.0148958	0.412752
ENSG00000130158.12	0.00418692	0.550126
ENSG00000130177.13	-0.00484227	0.555828
ENSG00000130182.6	0.683608	0.104123
ENSG00000130201.6	0.0150052	0.725579
ENSG00000130203.8	-0.00116625	0.15033
ENSG00000130208.8	-0.00566365	0.170885
ENSG00000130255.11	-0.000561882	0.373932
ENSG00000130270.15	-0.0506015	0.655379
ENSG00000130287.12	-0.0116312	0.864038
ENSG00000130307.10	-0.0083396	0.951797
ENSG00000130309.9	0.000727378	0.754982
ENSG00000130312.5	-0.0115438	0.315761
ENSG00000130368.5	-0.258936	0.928175
ENSG00000130377.12	2.04804	0.00467769
ENSG00000130402.10	-0.000150715	0.825541
ENSG00000130414.10	-0.00621341	0.320748
ENSG00000130427.2	0.00221923	0.993366
ENSG00000130433.6	-0.00556189	0.983562
ENSG00000130475.13	-0.012763	0.329407
ENSG00000130489.11	-0.0124412	0.224751
ENSG00000130508.9	0.00230629	0.00141912
ENSG00000130511.14	-0.0118612	0.167455
ENSG00000130513.6	-0.00130512	0.16969
ENSG00000130517.12	-0.000667929	0.937471
ENSG00000130518.15	-0.0395626	0.379883
ENSG00000130545.14	-0.0180863	0.188274
ENSG00000130561.15	0.691197	0.0112442
ENSG00000130595.15	-6.14082e-05	0.964337
ENSG00000130598.14	0.000921085	0.569181
ENSG00000130600.14	4.11185e-05	0.637684
ENSG00000130640.12	-0.0110612	0.169643
ENSG00000130643.7	-0.505862	0.594327
ENSG00000130684.12	-0.0595878	0.516484
ENSG00000130695.12	-0.00156008	0.93198
ENSG00000130702.12	0.000168174	0.845606
ENSG00000130703.14	0.000153497	0.980244
ENSG00000130706.11	-0.00447179	0.178281
ENSG00000130713.14	0.00226019	0.884519
ENSG00000130714.14	-0.0254543	0.145934
ENSG00000130717.11	-0.0103468	0.449273
ENSG00000130720.11	0.000312773	0.964277
ENSG00000130723.16	0.00344847	0.157186
ENSG00000130762.13	-0.00651691	0.352282
ENSG00000130779.18	0.00466335	0.154003
ENSG00000130783.12	0.279829	0.0134784
ENSG00000130787.12	-0.00397575	0.329513
ENSG00000130812.9	-0.824087	0.217998
ENSG00000130827.6	0.00269912	0.602924
ENSG00000130830.13	-0.0253508	0.140395
ENSG00000130844.15	-0.00932634	0.271287
ENSG00000130881.12	0.00694945	0.243777
ENSG00000130943.6	0.70316	0.00168449
ENSG00000130950.12	0.471651	0.790549
ENSG00000130957.4	-0.0458425	0.639217
ENSG00000130958.10	-0.0101855	0.541429
ENSG00000130985.15	0.000498782	0.714891
ENSG00000130997.15	-0.00132352	0.989958
ENSG00000131015.4	0.0204553	0.075213
ENSG00000131043.10	-0.000423421	0.969477
ENSG00000131050.9	-0.350373	0.441161
ENSG00000131116.10	-0.0158895	0.217139
ENSG00000131127.12	0.0566523	0.0263803
ENSG00000131153.7	-0.00197904	0.873419
ENSG00000131174.4	-0.00185083	0.627996
ENSG00000131183.9	0.239545	0.74198
ENSG00000131187.8	0.00643968	0.582976
ENSG00000131188.10	-0.0111345	0.812525
ENSG00000131203.11	-0.00434328	0.160115
ENSG00000131233.9	2.07952	0.0534686
ENSG00000131263.11	0.0201778	0.0555154
ENSG00000131368.6	-0.00590448	0.32228
ENSG00000131379.8	0.118599	0.797739
ENSG00000131381.11	-0.00997274	0.441345
ENSG00000131389.15	-0.00145456	0.701131
ENSG00000131398.12	-0.00202665	0.89891
ENSG00000131408.12	-0.0183443	0.00634546
ENSG00000131409.11	-0.0120049	0.844487
ENSG00000131446.14	-0.000195242	0.79832
ENSG00000131459.11	0.0161503	0.0608392
ENSG00000131469.11	-0.000597578	0.394479
ENSG00000131471.5	0.00279782	0.0940596
ENSG00000131475.5	-0.00387698	0.635208
ENSG00000131584.17	-0.00208972	0.642431
ENSG00000131591.16	-0.0236917	0.110836
ENSG00000131738.8	0.0174692	0.00147076
ENSG00000131747.13	0.00169955	0.0339739
ENSG00000131748.14	-0.0087522	0.28332
ENSG00000131759.16	0.00485436	0.559014
ENSG00000131771.12	-0.000697434	0.810227
ENSG00000131788.14	-0.00205437	0.783903
ENSG00000131885.15	0.222677	0.178378
ENSG00000131914.9	-0.716682	0.790918
ENSG00000131966.12	-0.0101312	0.384961
ENSG00000131969.13	0.398226	0.000245462
ENSG00000132004.11	-0.0384231	0.221546
ENSG00000132010.14	0.341659	0.125679
ENSG00000132155.10	-2.97126e-05	0.982723
ENSG00000132185.15	-0.0173832	0.415843
ENSG00000132196.12	-0.0121241	0.622266
ENSG00000132205.9	-0.00317925	0.765099
ENSG00000132326.10	0.00941007	0.558745
ENSG00000132356.10	0.00494728	0.331967
ENSG00000132382.13	-0.00904104	0.115374
ENSG00000132386.9	-0.00115035	0.53269
ENSG00000132388.11	-0.00923081	0.378043
ENSG00000132405.17	0.0119567	0.493685
ENSG00000132406.10	-0.0553865	0.0737918
ENSG00000132464.10	-0.801387	0.677185
ENSG00000132467.3	-0.018406	0.320542
ENSG00000132510.9	-0.0113046	0.0811604
ENSG00000132535.17	-0.00175409	0.932484
ENSG00000132554.18	0.346193	0.221497
ENSG00000132561.12	0.00366814	0.0650408
ENSG00000132563.14	0.024117	0.092516
ENSG00000132570.13	0.0842338	0.0294719
ENSG00000132604.9	0.00865019	0.442326
ENSG00000132612.15	0.00284917	0.598027
ENSG00000132613.13	0.00128694	0.862358
ENSG00000132670.19	-0.00660182	0.358949
ENSG00000132676.14	-0.00165599	0.70638
ENSG00000132677.11	-0.0122315	0.236754
ENSG00000132680.9	-0.00257111	0.69443
ENSG00000132681.15	-0.00980759	0.430577
ENSG00000132688.10	0.00574527	0.143683
ENSG00000132693.11	-0.227185	0.334606
ENSG00000132698.12	-0.00269464	0.176397
ENSG00000132703.3	-1.56792	0.223519
ENSG00000132744.6	-0.0579989	0.411857
ENSG00000132746.13	0.00167252	0.428438
ENSG00000132749.9	0.0193092	0.620852
ENSG00000132768.12	-0.00821167	0.558831
ENSG00000132793.10	0.00232675	0.751883
ENSG00000132832.8	-0.219985	0.298967
ENSG00000132855.4	0.232685	0.0908132
ENSG00000132881.10	0.0263889	0.842066
ENSG00000132912.11	0.0119278	0.14198
ENSG00000132953.15	0.00862492	0.513423
ENSG00000133048.11	0.000229514	0.838036
ENSG00000133055.7	0.408864	0.541938
ENSG00000133067.16	0.00695084	0.671506
ENSG00000133103.15	0.0243424	0.155993
ENSG00000133104.11	0.00905774	0.250895
ENSG00000133121.19	0.00261633	0.857203
ENSG00000133135.12	0.00249756	0.0548736
ENSG00000133138.18	0.0702756	0.0305793
ENSG00000133142.16	-0.00380113	0.347398
ENSG00000133169.5	-0.109079	0.734587
ENSG00000133193.11	0.036521	0.0160241
ENSG00000133195.10	0.00486462	0.318061
ENSG00000133243.7	-0.00778791	0.110744
ENSG00000133246.10	-0.277698	0.0413922
ENSG00000133250.12	-0.0599826	0.143194
ENSG00000133265.9	-0.0158912	0.0336758
ENSG00000133275.14	-0.0117584	0.077986
ENSG00000133392.15	-5.42088e-05	0.668995
ENSG00000133393.11	-0.0127001	0.453231
ENSG00000133422.11	0.0071817	0.261135
ENSG00000133466.12	-0.00028607	0.928698
ENSG00000133488.13	0.0686135	0.13752
ENSG00000133519.11	0.0135919	0.758533
ENSG00000133612.17	-0.00201975	0.456558
ENSG00000133624.12	-0.0151418	0.619093
ENSG00000133627.16	-0.0209393	0.634646
ENSG00000133657.13	0.00563174	0.0181386
ENSG00000133687.14	0.000337065	0.977594
ENSG00000133706.16	0.00711232	0.198791
ENSG00000133789.13	-0.00552817	0.354264
ENSG00000133816.12	0.00228924	0.412177
ENSG00000133818.11	-0.00976579	0.480994
ENSG00000133835.13	0.00469462	0.122879
ENSG00000133884.8	-0.0251469	0.0525317
ENSG00000133961.18	0.00225631	0.757839
ENSG00000133962.6	-0.00285668	0.953208
ENSG00000133983.13	-0.049374	0.105827
ENSG00000134049.4	-0.00196656	0.804961
ENSG00000134056.10	-0.0567983	0.0616266
ENSG00000134057.13	-2.74364e-05	0.994197
ENSG00000134058.9	-0.0277632	0.148932
ENSG00000134070.4	-0.012034	0.106886
ENSG00000134138.18	-0.0114332	0.484993
ENSG00000134160.12	1.08516	0.169436
ENSG00000134184.11	-0.000364128	0.587497
ENSG00000134201.9	-0.0409078	0.266358
ENSG00000134202.9	-0.00229616	0.138431
ENSG00000134216.17	0.412714	0.0885944
ENSG00000134222.15	-0.00263737	0.891528
ENSG00000134242.14	-0.10033	0.0638889
ENSG00000134243.10	0.00260486	0.364301
ENSG00000134245.16	0.0440636	0.439884
ENSG00000134285.9	-0.00501115	0.584145
ENSG00000134287.8	-0.000327115	0.919129
ENSG00000134313.13	0.00849322	0.157411
ENSG00000134318.12	0.00598753	0.251874
ENSG00000134323.10	-0.010532	0.325719
ENSG00000134330.17	-0.00661538	0.633242
ENSG00000134333.12	-0.00026189	0.494506
ENSG00000134339.7	-0.00255729	0.725459
ENSG00000134375.9	-0.0114777	0.284638
ENSG00000134389.9	-1.29765	0.567255
ENSG00000134398.11	-0.00223123	0.663904
ENSG00000134419.14	-0.000577121	0.498074
ENSG00000134438.9	-4.74464	0.248648
ENSG00000134460.14	-0.0661651	0.0618024
ENSG00000134480.12	-0.0184366	0.472324
ENSG00000134489.6	-2.04623	0.612131
ENSG00000134539.15	-0.0588423	0.172254
ENSG00000134545.12	-0.295915	0.154006
ENSG00000134571.9	-0.0221436	0.972811
ENSG00000134612.10	-0.409632	0.859246
ENSG00000134640.2	0.44089	0.0641094
ENSG00000134686.15	-0.00708419	0.0689081
ENSG00000134762.15	0.000418721	0.310497
ENSG00000134780.8	-0.00866483	0.856541
ENSG00000134812.6	-0.779301	0.623816
ENSG00000134815.17	-0.0201978	0.116004
ENSG00000134827.6	-0.00877348	0.189308
ENSG00000134830.5	-0.150573	0.221081
ENSG00000134853.10	0.00420559	0.562199
ENSG00000134884.12	0.00164716	0.687301
ENSG00000134899.16	-0.0163958	0.274621
ENSG00000134962.6	-0.00353143	0.991625
ENSG00000135040.14	0.0272268	0.150353
ENSG00000135047.13	-0.000247337	0.777078
ENSG00000135070.12	0.0178266	0.260967
ENSG00000135083.13	0.0080095	0.571873
ENSG00000135093.11	0.0109036	0.745602
ENSG00000135114.11	0.000154524	0.964761
ENSG00000135144.6	-0.0264236	0.441529
ENSG00000135220.9	0.00366724	0.225738
ENSG00000135245.9	-0.00348947	0.341505
ENSG00000135248.14	-0.228384	0.6464
ENSG00000135249.6	-0.013408	0.673527
ENSG00000135250.15	0.0127906	0.1905
ENSG00000135253.12	0.0143695	0.304785
ENSG00000135317.11	-0.0037778	0.640889
ENSG00000135324.5	0.0506357	0.246443
ENSG00000135372.7	-0.0097212	0.199133
ENSG00000135387.18	-0.00203529	0.378914
ENSG00000135390.16	-0.00371855	0.0786074
ENSG00000135392.14	0.0326381	0.114257
ENSG00000135407.9	0.0418271	0.192834
ENSG00000135409.9	-1.60331	0.584859
ENSG00000135436.7	0.366664	0.0110051
ENSG00000135439.10	-0.00446393	0.82359
ENSG00000135452.8	0.0049332	0.637903
ENSG00000135457.8	-0.00933745	0.503742
ENSG00000135476.10	-0.00189392	0.847476
ENSG00000135477.10	-0.0219283	0.476466
ENSG00000135482.5	-0.0103798	0.861864
ENSG00000135503.11	0.0019188	0.729197
ENSG00000135506.14	0.00123928	0.432481
ENSG00000135537.15	0.070453	0.510621
ENSG00000135596.16	-0.0121934	0.0711831
ENSG00000135605.11	-0.0641971	0.62192
ENSG00000135625.7	-0.144306	0.419421
ENSG00000135632.10	-0.0241629	0.0964675
ENSG00000135702.13	0.183055	0.132256
ENSG00000135740.15	-0.0404237	0.624237
ENSG00000135747.10	0.272589	0.684392
ENSG00000135821.15	0.000249141	0.723489
ENSG00000135828.10	0.0485417	0.0324126
ENSG00000135829.15	0.00120317	0.72178
ENSG00000135835.9	0.092937	0.181195
ENSG00000135838.12	-0.000194051	0.980039
ENSG00000135902.8	0.0738088	0.948041
ENSG00000135916.14	0.000398757	0.562212
ENSG00000135919.11	-0.0012369	0.712497
ENSG00000135924.14	-0.00344653	0.432041
ENSG00000135925.7	0.00980801	0.0611737
ENSG00000135929.7	-0.00912959	0.403283
ENSG00000136040.7	-0.0120045	0.4128
ENSG00000136045.10	-0.0167733	0.160507
ENSG00000136059.13	-0.00282409	0.490741
ENSG00000136098.15	0.0615697	0.0325159
ENSG00000136100.11	0.013221	0.0573444
ENSG00000136114.14	0.00759929	0.683207
ENSG00000136147.15	-0.00801529	0.47615
ENSG00000136193.15	0.00669499	0.108294
ENSG00000136197.11	0.798475	0.0330689
ENSG00000136238.16	-0.00134114	0.314267
ENSG00000136240.8	-0.000327783	0.833986
ENSG00000136243.15	-0.0256812	0.291592
ENSG00000136250.10	-0.0356617	0.198605
ENSG00000136271.9	-0.00368641	0.556234
ENSG00000136273.10	0.0247221	0.403654
ENSG00000136279.17	-0.00457267	0.189297
ENSG00000136286.13	-0.0199134	0.195969
ENSG00000136327.6	-0.0464404	0.632309
ENSG00000136352.16	-0.00182707	0.869592
ENSG00000136381.11	0.010012	0.291003
ENSG00000136404.14	-0.405412	0.0813703
ENSG00000136444.8	0.0109186	0.036643
ENSG00000136463.7	0.00221908	0.889034
ENSG00000136485.13	0.00406853	0.163913
ENSG00000136492.7	0.0139022	0.313501
ENSG00000136535.13	-0.208699	0.470564
ENSG00000136560.12	0.00840339	0.520834
ENSG00000136574.16	0.0616753	0.0756128
ENSG00000136603.12	0.000357155	0.900203
ENSG00000136628.16	-0.00135042	0.728896
ENSG00000136631.11	-0.00867721	0.376395
ENSG00000136682.13	-0.111428	0.0864304
ENSG00000136688.9	0.00406615	0.207166
ENSG00000136694.8	-0.268511	0.863656
ENSG00000136695.13	0.00448467	0.319493
ENSG00000136697.11	0.871881	0.00098223
ENSG00000136731.11	0.00775502	0.0245422
ENSG00000136783.9	-0.0152954	0.37626
ENSG00000136807.10	-0.00704612	0.393453
ENSG00000136811.15	1.80476e-05	0.998266
ENSG00000136819.13	-0.00770335	0.334556
ENSG00000136826.13	-0.00162335	0.659879
ENSG00000136827.11	-0.00246991	0.833824
ENSG00000136828.17	0.0244938	0.0155736
ENSG00000136840.17	-0.0117305	0.474325
ENSG00000136842.12	-0.018957	0.64878
ENSG00000136856.16	3.27227e-05	0.996227
ENSG00000136877.13	-0.0064038	0.312609
ENSG00000136881.10	0.00578801	0.00163726
ENSG00000136883.11	0.0169636	0.224248
ENSG00000136895.17	-0.0109381	0.71182
[truncated: 6,970 more rows]

## Sheet: CG.DFI.BRCA
Gene	Coefficient	Logrank p-value
ENSG00000000460.15	-0.00116116	0.911149
ENSG00000000938.11	-0.0258895	0.104521
ENSG00000001167.13	0.00112909	0.392049
ENSG00000001617.10	-0.00247097	0.172122
ENSG00000002834.16	-0.000177554	0.5608
ENSG00000003096.12	-0.00321823	0.637196
ENSG00000003393.13	-8.0068e-05	0.99384
ENSG00000003400.13	-0.0113814	0.403077
ENSG00000003402.18	-0.000737805	0.796726
ENSG00000003989.15	8.21815e-05	0.738364
ENSG00000004660.13	0.000779307	0.957128
ENSG00000004779.8	0.00309051	0.438077
ENSG00000004809.12	0.135025	0.115052
ENSG00000004838.12	-0.0285145	0.00304938
ENSG00000004975.10	0.000585301	0.950886
ENSG00000005059.14	-0.00608924	0.560662
ENSG00000005075.14	0.00132649	0.783795
ENSG00000005187.10	-0.0305278	0.382101
ENSG00000005189.18	-0.0192165	0.315827
ENSG00000005249.11	-0.00300902	0.250054
ENSG00000005339.11	-0.00298467	0.170936
ENSG00000005379.14	-0.00427944	0.491021
ENSG00000005486.15	-0.000536085	0.779759
ENSG00000005801.15	-0.0176293	0.17893
ENSG00000005961.16	0.024291	0.710989
ENSG00000005981.11	-0.707792	0.09471
ENSG00000006047.11	0.0163406	0.00858639
ENSG00000006062.12	-0.0206233	0.0850585
ENSG00000006071.10	-0.00578611	0.383294
ENSG00000006210.6	0.000523859	0.344842
ENSG00000006282.18	-0.00160134	0.427843
ENSG00000006283.16	0.046956	0.0429259
ENSG00000006327.12	0.00141848	0.491921
ENSG00000006534.14	0.00346149	0.58863
ENSG00000006607.12	-0.0058956	0.417822
ENSG00000006659.11	-0.548329	0.50062
ENSG00000006704.9	0.00739559	0.234671
ENSG00000006744.17	0.00764564	0.088256
ENSG00000006756.14	-0.00235664	0.181139
ENSG00000006757.10	-0.00878589	0.195254
ENSG00000007038.9	0.00268147	0.765002
ENSG00000007047.13	0.00437541	0.20844
ENSG00000007080.9	0.00513348	0.079216
ENSG00000007168.11	-0.000341106	0.887016
ENSG00000007216.13	-0.011858	0.354093
ENSG00000007237.17	-0.00508799	0.160247
ENSG00000007264.12	0.0166068	0.0679684
ENSG00000007312.11	-0.0124773	0.316258
ENSG00000007314.10	-0.0104735	0.629221
ENSG00000007341.17	0.000421189	0.986743
ENSG00000007392.15	-0.00245938	0.618267
ENSG00000007402.10	0.00280788	0.352633
ENSG00000007516.12	-0.000540626	0.886786
ENSG00000007541.13	-0.00127093	0.581405
ENSG00000007933.11	0.00117843	0.259626
ENSG00000008056.11	0.00195583	0.843546
ENSG00000008130.14	-0.00336518	0.572481
ENSG00000008283.14	-0.000103367	0.851495
ENSG00000008516.15	-0.0166657	0.255463
ENSG00000008517.15	-0.000692297	0.719632
ENSG00000008853.15	-0.0132103	0.247434
ENSG00000009724.15	-0.3405	0.0578342
ENSG00000010256.9	0.00105357	0.472571
ENSG00000010319.5	-0.00180673	0.70052
ENSG00000010322.14	-0.00223225	0.508848
ENSG00000010327.9	0.00258411	0.0105117
ENSG00000010379.14	0.00500639	0.991166
ENSG00000010539.10	0.014157	0.566445
ENSG00000010610.8	-0.0030208	0.192176
ENSG00000010626.13	-0.0336073	0.0588942
ENSG00000010704.17	-0.0143322	0.185364
ENSG00000011083.7	0.0306173	0.930904
ENSG00000011143.15	-0.0212124	0.140043
ENSG00000011304.15	0.00393757	0.00887507
ENSG00000011376.8	-0.0151344	0.20009
ENSG00000011422.10	0.00308436	0.296199
ENSG00000011451.16	0.000749882	0.81176
ENSG00000011485.13	0.00676322	0.186805
ENSG00000011523.12	-0.0154661	0.0857284
ENSG00000012061.14	0.000596275	0.893586
ENSG00000012124.13	-0.00950315	0.334956
ENSG00000012211.11	0.0122955	0.615372
ENSG00000012983.10	0.00510666	0.315486
ENSG00000013275.6	0.00128635	0.482068
ENSG00000013306.14	0.00243572	0.0245887
ENSG00000013441.14	-0.00284256	0.405625
ENSG00000013561.16	0.000445648	0.903784
ENSG00000013588.5	-5.61327e-05	0.866895
ENSG00000014138.7	0.00787757	0.277254
ENSG00000014216.14	0.00146682	0.190521
ENSG00000014824.12	-0.00215028	0.52322
ENSG00000015285.9	-0.0115103	0.333337
ENSG00000015520.13	-0.0893143	0.101805
ENSG00000015676.16	0.000978074	0.736423
ENSG00000016402.11	-0.0182045	0.00495962
ENSG00000016864.15	-0.0052645	0.419058
ENSG00000017483.13	-0.00015974	0.98808
ENSG00000018280.15	0.00416439	0.780618
ENSG00000018408.13	0.000516421	0.726621
ENSG00000018625.13	-0.01473	0.419561
ENSG00000018699.10	0.00773376	0.452462
ENSG00000019102.10	-0.00724716	0.515035
ENSG00000019505.6	0.000692804	0.12102
ENSG00000019995.6	-0.00450963	0.683102
ENSG00000020181.16	0.00429275	0.331201
ENSG00000020426.9	0.000436153	0.968065
ENSG00000020633.17	0.000916592	0.784161
ENSG00000021300.12	-0.00186008	0.48384
ENSG00000021461.15	-1.27665	0.405503
ENSG00000021488.11	-0.546935	0.123318
ENSG00000021762.18	0.00174873	0.754686
ENSG00000021776.9	-0.000239675	0.95304
ENSG00000022277.11	-0.0021151	0.438439
ENSG00000022556.14	0.00169122	0.153075
ENSG00000023330.13	-0.00182844	0.768302
ENSG00000023445.12	-0.00479	0.111598
ENSG00000023572.7	0.0355971	0.00831753
ENSG00000023608.4	0.0417334	0.1211
ENSG00000023892.10	-0.0102663	0.258593
ENSG00000023902.12	0.00245076	0.403979
ENSG00000023909.8	0.0108932	0.035129
ENSG00000024422.10	-0.00137012	0.482488
ENSG00000025039.13	0.00382781	0.195042
ENSG00000025293.14	-0.00605695	0.131271
ENSG00000025800.12	0.00197898	0.325721
ENSG00000026950.15	-0.00786716	0.122215
ENSG00000027847.12	0.017024	0.00121385
ENSG00000028277.19	-0.0125771	0.3564
ENSG00000029153.13	0.00202042	0.366351
ENSG00000029363.14	-0.000544475	0.826145
ENSG00000029534.18	0.000867685	0.634254
ENSG00000029559.6	-0.000305571	0.856741
ENSG00000029993.13	0.00033267	0.780682
ENSG00000030110.11	0.0062521	0.413053
ENSG00000031081.9	-0.00220329	0.675113
ENSG00000033050.6	0.00475453	0.210317
ENSG00000033100.13	0.00424086	0.0966325
ENSG00000033327.11	-0.0015128	0.419352
ENSG00000033867.15	-0.00374012	0.0946078
ENSG00000034510.5	0.000173016	0.0894936
ENSG00000035141.6	0.00718615	0.0352001
ENSG00000035862.11	0.00018037	0.646995
ENSG00000036054.11	0.00785832	0.150411
ENSG00000036448.8	-0.0270759	0.548772
ENSG00000036530.7	0.0555975	0.187367
ENSG00000037280.14	0.00772089	0.501359
ENSG00000037757.12	0.0085395	0.288498
ENSG00000037965.5	0.015139	0.588802
ENSG00000038358.13	-0.0033277	0.627793
ENSG00000038532.13	-0.0108068	0.166182
ENSG00000039068.17	8.133e-05	0.723472
ENSG00000040199.17	-0.0247169	0.0733467
ENSG00000040633.11	-0.00120223	0.873432
ENSG00000041357.14	0.00204723	0.13029
ENSG00000041802.9	0.00448475	0.325343
ENSG00000041982.13	0.000118894	0.239468
ENSG00000042062.10	-0.00548476	0.520504
ENSG00000042286.13	-0.00195968	0.718427
ENSG00000042753.10	0.00369802	0.0101058
ENSG00000043143.19	-0.00996796	0.0111211
ENSG00000044090.7	0.00184981	0.13909
ENSG00000044446.10	-0.00351248	0.688108
ENSG00000046774.9	-0.00162506	0.909748
ENSG00000047457.12	0.000793162	0.0385934
ENSG00000047597.5	0.0254054	0.0249127
ENSG00000047617.13	-0.0321945	0.39001
ENSG00000047634.13	-0.0334093	0.0514854
ENSG00000047849.20	0.000812764	0.497962
ENSG00000048544.5	0.00311475	0.227508
ENSG00000049192.13	-0.00598252	0.868191
ENSG00000049245.11	-0.0058822	0.169932
ENSG00000049246.13	-0.0111608	0.0764404
ENSG00000049656.12	0.000869024	0.39151
ENSG00000049769.11	0.0360437	0.0840213
ENSG00000050405.12	-0.00300547	0.0749203
ENSG00000050555.16	0.0130884	2.82789e-06
ENSG00000050748.16	-0.00095119	0.813829
ENSG00000050767.14	0.038908	0.0560439
ENSG00000051382.7	0.00011979	0.976744
ENSG00000051825.13	0.010443	0.245018
ENSG00000052344.14	-0.00130668	0.121569
ENSG00000053254.14	0.00705611	0.0654432
ENSG00000053438.8	0.0127632	0.570561
ENSG00000053501.11	0.0117013	0.153063
ENSG00000053900.9	-0.0169127	0.351046
ENSG00000054118.12	-0.00176181	0.461878
ENSG00000054179.10	0.00232214	0.432248
ENSG00000054219.10	-0.00950003	0.373264
ENSG00000054392.11	-0.0205024	0.0133742
ENSG00000054598.6	0.00166654	0.149882
ENSG00000054938.14	0.00114669	0.572713
ENSG00000054965.9	-0.00200362	0.40203
ENSG00000054967.11	0.00223149	0.903277
ENSG00000054983.15	0.00021949	0.961933
ENSG00000055211.11	-0.0063516	0.261677
ENSG00000055483.18	-0.00580824	0.219716
ENSG00000055917.14	0.00226401	0.207963
ENSG00000055955.14	-0.342854	0.344982
ENSG00000055957.9	-1.86057	0.069853
ENSG00000056558.9	-0.0125692	0.18096
ENSG00000056586.14	0.00546506	0.0690563
ENSG00000057252.11	-0.00372792	0.364244
ENSG00000057468.6	-0.0362097	0.91571
ENSG00000057593.12	-0.0140934	0.231588
ENSG00000058453.15	0.00341012	0.631903
ENSG00000058600.14	-0.00355956	0.55196
ENSG00000058673.14	0.000354648	0.81728
ENSG00000058729.9	-0.011536	0.366784
ENSG00000059145.17	0.0206552	0.097186
ENSG00000059573.7	-0.000174514	0.90252
ENSG00000059915.15	0.0245157	0.0122929
ENSG00000060140.7	-0.0120991	0.563667
ENSG00000060558.3	0.00536235	0.442423
ENSG00000060642.9	-0.0175812	0.132922
ENSG00000061273.16	-0.00266334	0.466428
ENSG00000062096.13	-0.269089	0.27725
ENSG00000062524.14	-0.147361	0.331393
ENSG00000062822.11	0.00881796	0.135502
ENSG00000063015.18	0.000993551	0.866248
ENSG00000063046.16	-0.000847231	0.258843
ENSG00000063127.14	-0.0324164	0.575667
ENSG00000063241.6	0.00504164	0.00254853
ENSG00000063244.11	0.00174299	0.185659
ENSG00000064012.20	0.00378122	0.700524
ENSG00000064201.14	-0.178735	0.159253
ENSG00000064218.4	0.0140151	0.714396
ENSG00000064313.10	0.0020456	0.501032
ENSG00000064545.13	0.0132183	0.00873254
ENSG00000064547.12	0.000798158	0.916482
ENSG00000064601.15	0.00196202	0.115511
ENSG00000064652.9	-0.0182466	0.198755
ENSG00000064666.13	0.00239779	0.0765826
ENSG00000064687.11	0.00981898	0.213359
ENSG00000064886.12	0.00127442	0.0457105
ENSG00000064961.17	0.00177163	0.336466
ENSG00000064999.13	0.00167953	0.661903
ENSG00000065029.13	-0.00511748	0.561515
ENSG00000065060.15	-0.00106524	0.819024
ENSG00000065268.9	0.00772394	0.105706
ENSG00000065328.15	0.00698115	0.166397
ENSG00000065371.16	0.00118105	0.863171
ENSG00000065615.12	0.0105637	0.389981
ENSG00000065665.19	-0.00444662	0.813976
ENSG00000065717.13	-0.00544395	0.259603
ENSG00000065802.10	0.0148427	0.23896
ENSG00000065978.16	0.0003748	0.13342
ENSG00000066084.11	0.000382165	0.896917
ENSG00000066117.13	-0.000890124	0.892555
ENSG00000066279.15	0.00573487	0.0250266
ENSG00000066336.10	0.00119089	0.830331
ENSG00000066379.13	0.0166124	0.18078
ENSG00000066422.4	0.00282014	0.724799
ENSG00000066629.15	0.00337185	0.758338
ENSG00000066651.16	-0.00380614	0.805676
ENSG00000066654.11	-0.00448147	0.205515
ENSG00000066926.9	-0.00144711	0.836095
ENSG00000067177.13	0.00467537	0.462384
ENSG00000067182.6	0.000599334	0.801024
ENSG00000067191.14	-0.00156194	0.884301
ENSG00000067225.16	0.000290785	0.0893665
ENSG00000067334.12	0.00258425	0.375266
ENSG00000067596.9	-0.00116566	0.794304
ENSG00000067829.17	0.00890905	0.0187097
ENSG00000067840.11	0.0103554	0.332523
ENSG00000067900.6	-0.00164237	0.620509
ENSG00000067955.12	0.00361683	0.406589
ENSG00000067992.11	0.00322816	0.457243
ENSG00000068001.12	0.0066672	0.107096
ENSG00000068079.6	-0.0065767	0.092823
ENSG00000068120.13	0.00120091	0.638249
ENSG00000068137.13	0.00153564	0.711615
ENSG00000068308.12	-0.00496457	0.376194
ENSG00000068400.12	-0.00815238	0.220608
ENSG00000068615.15	-0.00595111	0.257726
ENSG00000068724.14	0.00441752	0.180324
ENSG00000068745.13	-0.00303289	0.514033
ENSG00000068781.19	0.935271	0.317544
ENSG00000068831.17	-0.00498633	0.716598
ENSG00000069399.11	-0.00173323	0.541971
ENSG00000069493.13	-0.021586	0.117998
ENSG00000069712.10	0.00345161	0.889031
ENSG00000069956.10	0.00682292	0.0108553
ENSG00000069966.17	-0.00230105	0.820273
ENSG00000070214.14	-0.00183443	0.174169
ENSG00000070404.8	8.54975e-05	0.98684
ENSG00000070444.13	0.000403582	0.975109
ENSG00000070476.13	-0.00408183	0.721314
ENSG00000070601.8	-0.0585017	0.496969
ENSG00000070729.12	0.169214	0.014895
ENSG00000070731.8	-0.00175225	0.396022
ENSG00000070785.15	0.0135638	0.120895
ENSG00000070808.14	-0.0921205	0.591102
ENSG00000070831.14	-0.00143142	0.301026
ENSG00000070915.8	-0.0449592	0.722351
ENSG00000070950.8	0.00256855	0.756405
ENSG00000071127.15	0.000570092	0.613824
ENSG00000071564.13	0.00452851	0.0242929
ENSG00000071626.15	0.00610411	0.0210365
ENSG00000071655.16	0.00669353	0.00212161
ENSG00000071677.1	0.0694244	0.916172
ENSG00000071859.13	0.00343045	0.145843
ENSG00000071889.15	0.00806373	0.0433342
ENSG00000072042.11	-0.000160212	0.951079
ENSG00000072062.12	0.00318079	0.171095
ENSG00000072134.14	-0.0030759	0.583408
ENSG00000072195.13	0.00759741	0.0137837
ENSG00000072415.7	-0.0029564	0.599239
ENSG00000072736.17	-0.00330309	0.7064
ENSG00000072818.10	-0.011659	0.241972
ENSG00000072832.13	0.00243207	0.700208
ENSG00000072858.9	-0.0026365	0.429847
ENSG00000072958.7	0.0077442	0.125883
ENSG00000073008.13	0.0115132	0.00273218
ENSG00000073146.14	-0.0122894	0.900512
ENSG00000073150.12	0.0117584	0.173539
ENSG00000073464.10	0.00142837	0.861411
ENSG00000073670.12	0.0451724	0.571327
ENSG00000073711.9	-0.00162057	0.74817
ENSG00000073734.8	-0.132326	0.649231
ENSG00000073737.15	-0.0401999	0.26552
ENSG00000073905.8	2.07126	0.0304842
ENSG00000074266.16	0.00791716	0.466608
ENSG00000074319.11	-0.00325207	0.403359
ENSG00000074370.16	1.79114e-05	0.98113
ENSG00000074527.10	-0.00255633	0.0117549
ENSG00000074590.12	0.00122835	0.827189
ENSG00000074660.14	0.00935179	0.646774
ENSG00000074842.6	0.0031682	0.0593769
ENSG00000074966.9	-0.181566	0.218221
ENSG00000075340.21	0.00432878	0.553036
ENSG00000075426.10	-0.000352794	0.78123
ENSG00000076003.4	0.001275	0.565451
ENSG00000076043.8	0.010287	0.0442469
ENSG00000076067.10	-0.00391707	0.595475
ENSG00000076108.10	-0.00212834	0.31344
ENSG00000076248.9	0.00569811	0.0545775
ENSG00000076258.8	0.0295715	0.117862
ENSG00000076321.9	-0.00170699	0.912499
ENSG00000076554.14	6.26302e-05	0.900671
ENSG00000076555.14	-0.000443529	0.904567
ENSG00000076650.5	0.0104771	0.521137
ENSG00000076706.13	0.0031494	0.0142453
ENSG00000076864.18	0.00433705	0.133766
ENSG00000076928.16	0.00150668	0.519769
ENSG00000077044.8	-0.000966511	0.788801
ENSG00000077147.13	-0.000178621	0.857932
ENSG00000077279.15	0.00101211	0.823365
ENSG00000077454.14	-0.0265388	0.160669
ENSG00000077616.9	0.0863392	0.14178
ENSG00000077713.17	0.0113385	0.165595
ENSG00000077782.18	-0.000562831	0.325999
ENSG00000078070.10	-0.00165556	0.717528
ENSG00000078081.6	-0.00388671	0.411553
ENSG00000078124.10	-0.00526184	0.206709
ENSG00000078142.10	-0.000550587	0.936643
ENSG00000078319.8	-0.0586949	0.0850225
ENSG00000078399.14	-0.00357489	0.750812
ENSG00000078596.9	-0.0110581	0.086718
ENSG00000078747.11	-0.00106861	0.796263
ENSG00000078898.6	-0.00252792	0.469005
ENSG00000079246.14	5.5189e-05	0.954037
ENSG00000079277.18	-0.00351106	0.808373
ENSG00000079313.10	0.0215524	0.0228885
ENSG00000079335.16	1.31e-05	0.998296
ENSG00000079337.14	-0.01461	0.160061
ENSG00000079387.12	-7.92459e-05	0.993101
ENSG00000079393.19	0.0288663	0.416213
ENSG00000079432.6	0.00306315	0.332556
ENSG00000079459.11	-0.00139206	0.398945
ENSG00000079616.11	0.00239355	0.291156
ENSG00000079805.15	0.00281563	0.0449566
ENSG00000079950.12	0.00253358	0.494462
ENSG00000079999.12	0.00415795	0.130244
ENSG00000080224.16	-0.0272915	0.663003
ENSG00000080644.14	-0.0351125	0.675936
ENSG00000080854.13	0.0569264	0.0017076
ENSG00000081051.6	-0.00367483	0.706529
ENSG00000081148.11	-0.017417	0.950989
ENSG00000081154.10	-0.00157391	0.643362
ENSG00000081181.6	0.0344792	0.23373
ENSG00000081307.11	-0.00409065	0.645274
ENSG00000081692.11	0.00918944	0.0587986
ENSG00000081760.15	-0.0014487	0.62951
ENSG00000081803.14	-0.0035713	0.220073
ENSG00000081818.3	0.0139133	0.472068
ENSG00000081853.14	0.00443164	0.8434
ENSG00000082068.7	0.00709723	0.508795
ENSG00000082074.14	-0.00376142	0.353335
ENSG00000082126.16	0.202374	0.756012
ENSG00000082153.16	0.000805061	0.47046
ENSG00000082269.15	0.0296028	0.00603992
ENSG00000082397.14	-0.00429716	0.246176
ENSG00000082512.13	-0.00506614	0.241104
ENSG00000082781.10	0.00038766	0.540095
ENSG00000083099.9	0.000433564	0.904491
ENSG00000083123.13	-0.0120216	0.265263
ENSG00000083223.16	0.00454038	0.335074
ENSG00000083444.15	0.00122044	0.00111655
ENSG00000083642.17	-0.0048122	0.318788
ENSG00000083782.6	-0.00174213	0.872311
ENSG00000083807.8	0.0132833	0.382754
ENSG00000083812.10	-0.00577463	0.80251
ENSG00000083838.14	-0.0164035	0.345974
ENSG00000083844.9	-0.00037327	0.947126
ENSG00000083845.7	9.49671e-05	0.779795
ENSG00000083896.11	-0.00989873	0.0663687
ENSG00000084092.6	0.0212262	0.000989624
ENSG00000084652.14	0.00298079	0.219744
ENSG00000084693.14	0.00443552	0.478915
ENSG00000084764.9	0.00911005	0.29312
ENSG00000085063.13	-0.000219117	0.488793
ENSG00000085117.10	-1.53614e-05	0.993237
ENSG00000085274.14	-0.00232655	0.686551
ENSG00000085377.12	0.00298395	0.0454821
ENSG00000085433.14	-0.00325579	0.788938
ENSG00000085465.12	-0.0175093	0.534953
ENSG00000085552.15	0.00142452	0.592218
ENSG00000085644.12	0.00351753	0.55829
ENSG00000085662.12	-0.0013794	0.731845
ENSG00000085831.14	-0.00307962	0.0134227
ENSG00000085832.15	0.00338018	0.425998
ENSG00000085978.20	-0.00360003	0.462016
ENSG00000085998.12	0.00128113	0.681497
ENSG00000086015.19	0.00489141	0.0924726
ENSG00000086159.11	-0.0106415	0.861773
ENSG00000086475.13	0.00206976	0.312832
ENSG00000086506.2	0.227903	0.353591
ENSG00000086589.10	-0.0100356	0.206008
ENSG00000086619.12	-0.00602912	0.316923
ENSG00000086730.15	-0.0225521	0.144007
ENSG00000086848.13	0.045154	0.18878
ENSG00000086967.9	-0.406427	0.130023
ENSG00000087008.14	-0.00212979	0.70664
ENSG00000087076.7	0.000626218	0.950309
ENSG00000087077.10	0.00107347	0.651839
ENSG00000087085.12	-0.0095909	0.618817
ENSG00000087086.12	0.000122097	0.0616841
ENSG00000087087.17	-0.00184249	0.555959
ENSG00000087088.18	0.00812369	0.0490239
ENSG00000087111.19	-0.00229852	0.415162
ENSG00000087152.14	0.00445103	0.314348
ENSG00000087191.11	-0.00016763	0.866373
ENSG00000087237.9	0.0802748	0.0212033
ENSG00000087245.11	9.65008e-05	0.705682
ENSG00000087253.10	-0.00302322	0.664324
ENSG00000087266.14	0.0086464	0.00165373
ENSG00000087274.15	0.000372557	0.824941
ENSG00000087338.4	0.00779696	0.32129
ENSG00000087502.16	0.0013276	0.69221
ENSG00000087589.15	-0.0285758	0.614739
ENSG00000087995.14	0.00286484	0.721705
ENSG00000088002.10	-0.00807429	0.264685
ENSG00000088205.11	-0.00015688	0.956285
ENSG00000088247.14	0.00152525	0.250134
ENSG00000088256.7	0.0041524	0.20913
ENSG00000088280.17	0.010024	0.00867913
ENSG00000088367.19	-0.00767895	0.0072638
ENSG00000088538.12	-0.000855303	0.962407
ENSG00000088826.16	0.0107457	0.0429448
ENSG00000088827.11	0.000912953	0.852099
ENSG00000088899.13	0.00914052	0.0184252
ENSG00000089012.13	-0.0518324	0.157221
ENSG00000089041.15	-0.00384676	0.750528
ENSG00000089057.13	0.0042609	0.224654
ENSG00000089063.13	-0.000160724	0.941983
ENSG00000089101.16	0.0184543	0.409458
ENSG00000089127.11	-0.0027468	0.109907
ENSG00000089169.13	-0.0102212	0.857607
ENSG00000089280.17	-0.000727234	0.477162
ENSG00000089351.13	0.00611808	0.000645177
ENSG00000089558.7	0.00609801	0.986969
ENSG00000089597.15	0.000540528	0.319086
ENSG00000089639.9	-0.002338	0.808007
ENSG00000089685.13	0.00138048	0.438111
ENSG00000089692.7	-0.0189798	0.223801
ENSG00000089775.10	0.0163987	0.336904
ENSG00000090006.16	-0.000258072	0.938953
ENSG00000090097.19	0.00464011	0.348078
ENSG00000090263.14	0.00139167	0.834926
ENSG00000090316.14	0.0103964	0.0173096
ENSG00000090382.5	-0.000736516	0.191383
ENSG00000090447.10	0.0129467	0.123664
ENSG00000090470.13	-0.0343726	0.068681
ENSG00000090512.10	-0.228759	0.704967
ENSG00000090554.11	-0.117563	0.220027
ENSG00000090615.11	0.00494443	0.0575858
ENSG00000090621.12	0.00103164	0.262541
ENSG00000090659.16	0.0136894	0.294484
ENSG00000090674.14	0.0113377	0.0040121
ENSG00000090686.14	-0.00437292	0.475449
ENSG00000090863.10	0.00259517	0.0147616
ENSG00000090924.13	0.0125703	0.000736743
ENSG00000090932.9	0.0771323	0.00247677
ENSG00000090975.11	0.017232	0.00815169
ENSG00000091039.15	-0.000311161	0.836182
ENSG00000091073.18	0.00675879	0.380183
ENSG00000091106.17	0.0832759	0.157842
ENSG00000091317.7	-0.00165879	0.309923
ENSG00000091490.9	0.00156174	0.537444
ENSG00000091513.13	0.000370759	0.497397
ENSG00000091536.15	-0.0191546	0.780621
ENSG00000091542.8	-0.00192844	0.528462
ENSG00000091844.6	0.0672882	0.0506738
ENSG00000091947.8	-9.13095e-05	0.949785
ENSG00000092010.13	-0.00347849	0.00690978
ENSG00000092054.12	-0.0670797	0.549574
ENSG00000092067.5	0.865469	0.425299
ENSG00000092068.17	-0.000504182	0.574359
ENSG00000092096.13	0.00108514	0.335678
ENSG00000092108.19	-0.000506064	0.889461
ENSG00000092140.13	0.00101854	0.868368
ENSG00000092199.16	-0.000371134	0.686055
ENSG00000092208.15	-0.00107165	0.968622
ENSG00000092295.10	0.00778381	0.669487
ENSG00000092330.14	-0.0146383	0.0307938
ENSG00000092439.12	-0.00159494	0.74353
ENSG00000092758.14	-0.000236678	0.885969
ENSG00000092871.15	-0.00665894	0.462073
ENSG00000092929.10	0.00183727	0.395494
ENSG00000093134.12	0.0559715	0.163702
ENSG00000094631.17	-0.00300145	0.678998
ENSG00000094796.4	-0.00924348	0.712499
ENSG00000094804.8	-0.00326363	0.28096
ENSG00000094914.11	0.0052464	0.566927
ENSG00000095059.14	0.00846566	0.00761173
ENSG00000095203.13	0.00693941	0.0974067
ENSG00000095261.12	0.00731137	0.0137693
ENSG00000095370.18	0.00424761	0.674696
ENSG00000095383.18	-0.000773578	0.919631
ENSG00000095397.12	-0.00928725	0.298172
ENSG00000095464.9	-0.652084	0.154288
ENSG00000095485.15	-0.01434	0.327637
ENSG00000095539.14	0.00607811	0.680242
ENSG00000095585.15	-0.0208401	0.0487025
ENSG00000095587.8	0.00575744	0.918028
ENSG00000095627.8	0.00782043	0.161132
ENSG00000095739.10	0.00174791	0.00287678
ENSG00000095752.5	0.0628314	0.109595
ENSG00000095970.15	-0.00189279	0.7825
ENSG00000096092.5	-0.000137947	0.982582
ENSG00000096401.7	0.00045879	0.86287
ENSG00000096433.9	0.000288399	0.855344
ENSG00000096717.10	-0.00860972	0.296909
ENSG00000097007.16	0.0027545	0.380322
ENSG00000097096.8	-0.00762377	0.386887
ENSG00000099204.17	-0.000554038	0.713294
ENSG00000099260.9	0.00204109	0.628304
ENSG00000099308.9	-0.0201848	0.269948
ENSG00000099330.7	0.00529899	0.449806
ENSG00000099337.4	-0.000448101	0.830322
ENSG00000099338.21	0.021092	0.150755
ENSG00000099341.10	0.00202221	0.0197203
ENSG00000099385.10	0.00290218	0.266288
ENSG00000099617.3	0.475757	0.0272562
ENSG00000099624.6	0.00249755	0.0774367
ENSG00000099800.6	0.0043442	0.00978927
ENSG00000099804.7	0.00874733	0.00913407
ENSG00000099812.7	0.00222386	0.357122
ENSG00000099814.14	0.00587452	0.0641034
ENSG00000099821.12	0.00967134	0.0777249
ENSG00000099864.16	0.0011136	0.796175
ENSG00000099875.13	0.000395816	0.710705
ENSG00000099901.15	0.00378801	0.0993508
ENSG00000099904.14	0.0136917	0.0457286
ENSG00000099942.11	0.000249478	0.937841
ENSG00000099954.17	-0.0225829	0.133817
ENSG00000099957.15	0.0889706	0.0849993
ENSG00000099960.11	-0.0438691	0.0547715
ENSG00000099974.7	-0.00527236	0.954819
ENSG00000099985.3	-0.000836851	0.97671
ENSG00000099991.15	0.0019713	0.623572
ENSG00000099992.14	-0.00678086	0.593109
ENSG00000099994.10	0.000285357	0.585751
ENSG00000099998.16	-0.000682006	0.816652
ENSG00000100023.16	0.0023916	0.684949
ENSG00000100031.17	0.000130321	0.92997
ENSG00000100034.12	0.0132019	0.0422974
ENSG00000100038.18	0.0450519	0.915426
ENSG00000100053.8	-0.425262	0.421138
ENSG00000100056.10	0.0273019	0.0365928
ENSG00000100060.16	-0.0137538	0.373284
ENSG00000100065.13	-0.00170542	0.823891
ENSG00000100068.10	-0.0532916	0.184057
ENSG00000100083.17	0.00682416	0.154561
ENSG00000100092.19	0.00180916	0.783003
ENSG00000100095.17	-0.000763058	0.703521
ENSG00000100097.10	0.000668666	5.96208e-05
ENSG00000100106.18	0.0142612	0.0922349
ENSG00000100116.15	0.00639218	0.382047
ENSG00000100122.5	0.518276	0.00563317
ENSG00000100139.12	0.00346049	0.137215
ENSG00000100142.13	-0.0186939	0.723588
ENSG00000100147.12	0.103262	0.0156019
ENSG00000100156.9	-0.0664388	0.442524
ENSG00000100170.8	0.00121785	0.662376
ENSG00000100197.19	-0.107704	0.437805
ENSG00000100206.8	0.0198918	0.780753
ENSG00000100207.17	0.00079627	0.808403
ENSG00000100220.10	0.00169755	0.625158
ENSG00000100226.14	-5.68475e-05	0.991545
ENSG00000100276.9	0.0400034	0.643159
ENSG00000100280.15	0.00070509	0.679756
ENSG00000100281.12	0.00495781	0.485738
ENSG00000100292.15	0.00385717	0.0419488
ENSG00000100297.14	0.00297291	0.291456
ENSG00000100298.14	-0.160939	0.284412
ENSG00000100335.11	0.00384514	0.471907
ENSG00000100348.8	0.005148	0.113855
ENSG00000100350.13	0.000728558	0.825605
ENSG00000100353.16	0.00151767	0.237318
ENSG00000100359.19	0.0012966	0.712319
ENSG00000100373.8	-0.0338627	0.437128
ENSG00000100385.12	-0.0105291	0.0718622
ENSG00000100399.14	0.00295337	0.887373
ENSG00000100401.18	0.00195743	0.195527
ENSG00000100403.11	-0.00095928	0.706085
ENSG00000100425.17	0.00170205	0.81627
ENSG00000100426.6	0.00906703	0.0082637
ENSG00000100427.14	0.00132756	0.558623
ENSG00000100441.8	0.00123399	0.739413
ENSG00000100445.15	-0.0556307	0.178825
ENSG00000100478.13	-0.0370137	0.24198
ENSG00000100479.11	0.022454	0.360252
ENSG00000100490.8	0.127037	0.187157
ENSG00000100519.10	0.00513849	0.0385834
ENSG00000100522.7	0.00602882	0.0135089
ENSG00000100567.11	0.00263598	0.268393
ENSG00000100568.9	0.00340058	0.214682
ENSG00000100592.14	0.000574852	0.8802
ENSG00000100593.16	0.27303	0.161332
ENSG00000100596.5	-0.0021684	0.111102
ENSG00000100628.10	-0.107783	0.12883
ENSG00000100652.4	0.0626081	0.838245
ENSG00000100714.14	0.00267642	0.286781
ENSG00000100726.13	0.00438361	0.198802
ENSG00000100749.6	0.0139884	0.198707
ENSG00000100802.13	-0.0449033	0.147675
ENSG00000100804.17	0.000576918	0.73733
ENSG00000100842.11	0.00286724	0.178512
ENSG00000100908.12	-0.00962774	0.449886
ENSG00000100918.11	-0.0055232	0.47608
ENSG00000100926.13	0.00148146	0.952497
ENSG00000100949.13	0.00749603	0.453195
ENSG00000100979.13	0.00215023	5.12561e-07
ENSG00000100987.13	-0.934859	0.0564527
ENSG00000100997.17	0.00170063	0.297254
ENSG00000101049.13	-0.0765642	0.353678
ENSG00000101052.11	-0.0158246	0.0796085
ENSG00000101084.15	0.000722097	0.936128
ENSG00000101096.18	-0.0111528	0.155612
ENSG00000101104.11	-0.00944279	0.175532
ENSG00000101146.11	-0.00201474	0.539512
ENSG00000101161.7	-0.00142888	0.31596
ENSG00000101203.15	-0.266998	0.568295
ENSG00000101220.16	0.0105608	0.00108429
ENSG00000101222.11	-0.1702	0.00307972
ENSG00000101236.15	0.00554816	0.0227861
ENSG00000101255.9	-0.000283056	0.933135
ENSG00000101294.15	0.0012807	0.205395
ENSG00000101307.14	0.00996829	0.803519
ENSG00000101310.13	-0.000317822	0.873654
ENSG00000101311.14	0.0123745	0.00756993
ENSG00000101331.14	0.000108837	0.997983
ENSG00000101336.11	-0.0128402	0.102689
ENSG00000101337.14	-0.00106409	0.695398
ENSG00000101342.8	-0.139877	0.378948
ENSG00000101367.8	-0.00147386	0.436604
ENSG00000101391.19	-0.0182986	0.119225
ENSG00000101400.5	-0.00832983	0.358285
ENSG00000101443.16	-0.000823046	0.321627
ENSG00000101445.8	-0.00580712	0.450696
ENSG00000101447.12	0.00494045	0.243771
ENSG00000101448.12	0.0597273	0.44533
ENSG00000101460.11	0.00176166	0.786098
ENSG00000101489.17	-0.000601658	0.952522
ENSG00000101680.12	-0.00806942	0.550832
ENSG00000101883.4	-0.377969	0.630458
ENSG00000101911.11	0.00400863	0.0534715
ENSG00000101928.11	0.0137659	0.435877
ENSG00000101945.15	0.00433922	0.752331
ENSG00000102001.11	-0.0621853	0.226315
ENSG00000102003.9	0.00540994	0.051652
ENSG00000102007.9	0.000305637	0.760264
ENSG00000102024.16	0.00331085	0.046482
ENSG00000102038.14	-0.000255252	0.903469
ENSG00000102054.16	-0.0013727	0.212353
ENSG00000102057.8	0.0325534	0.464678
ENSG00000102078.14	-0.0391567	0.27607
ENSG00000102096.9	-0.00599427	0.183637
ENSG00000102100.13	0.0033954	0.417387
ENSG00000102119.9	0.00389558	0.300671
ENSG00000102145.12	-1.40156	0.119477
ENSG00000102178.11	0.00562472	0.124821
ENSG00000102225.14	0.00144867	0.204193
ENSG00000102226.8	0.000500392	0.876814
ENSG00000102241.10	-0.00275222	0.345051
ENSG00000102245.6	-0.0628824	0.28968
ENSG00000102359.5	0.0113915	0.0968376
ENSG00000102384.12	0.0391552	0.0245827
ENSG00000102710.18	0.00145176	0.756955
ENSG00000102738.7	0.00446136	0.829513
ENSG00000102760.12	0.00572173	0.2241
ENSG00000102781.12	-0.0148948	0.28066
ENSG00000102802.8	-0.000561003	0.931292
ENSG00000102805.12	-0.0258465	0.211032
ENSG00000102854.13	0.00101339	0.145033
ENSG00000102858.11	0.00102681	0.711464
ENSG00000102870.5	-0.00757517	0.128858
ENSG00000102898.10	0.00286687	0.0788718
ENSG00000102901.11	0.00672015	0.467648
ENSG00000102908.19	0.00218555	0.526208
ENSG00000102962.4	-0.0153959	0.247028
ENSG00000103024.6	1.53335e-05	0.993435
ENSG00000103034.13	0.0037634	0.514529
ENSG00000103037.10	0.012354	0.363786
ENSG00000103043.13	0.00722829	0.152211
ENSG00000103047.6	0.00661501	0.761247
ENSG00000103064.12	0.0211605	0.141664
ENSG00000103066.11	0.00611922	0.335005
ENSG00000103067.10	-3.02486e-05	0.991157
ENSG00000103154.8	0.0350514	0.00345151
ENSG00000103168.15	0.00243513	0.740798
ENSG00000103196.10	-0.000874141	0.560354
ENSG00000103202.11	0.0012779	0.276299
ENSG00000103226.16	-0.0180007	0.427695
ENSG00000103260.7	-0.000886064	0.589213
ENSG00000103264.14	0.00263579	0.778681
ENSG00000103269.12	-0.00014291	0.99192
ENSG00000103313.10	-0.166405	0.418578
ENSG00000103319.10	0.00140039	0.66332
ENSG00000103335.18	0.00219836	0.0981139
ENSG00000103351.11	-0.0107823	0.220489
ENSG00000103355.11	0.00469608	0.128136
ENSG00000103375.9	-2.78152	0.0540752
ENSG00000103460.15	-0.00351829	0.361278
ENSG00000103485.16	0.0030139	0.352441
ENSG00000103489.10	-0.00187224	0.63166
ENSG00000103495.12	0.0026617	0.341916
ENSG00000103507.12	-0.00227317	0.554045
ENSG00000103510.18	-0.00848386	0.16538
ENSG00000103512.13	0.00165061	0.640511
ENSG00000103534.15	-0.00121592	0.398506
ENSG00000103540.15	-0.00779228	0.14954
ENSG00000103544.13	-0.00605395	0.149725
ENSG00000103550.12	0.000706296	0.925031
ENSG00000103653.15	0.00438511	0.181709
ENSG00000103657.12	-0.00188384	0.395296
ENSG00000103742.10	-0.00512892	0.845608
ENSG00000103932.10	0.0173282	0.0365487
ENSG00000104055.13	0.00369783	0.791461
ENSG00000104142.9	0.00491765	0.504517
ENSG00000104205.11	-0.00899647	0.0613889
ENSG00000104213.11	0.00204852	0.667536
ENSG00000104218.12	0.000637674	0.934762
ENSG00000104219.11	0.00189044	0.75527
ENSG00000104221.11	0.00378292	0.515291
ENSG00000104341.15	0.00012308	0.510167
ENSG00000104450.11	-0.00874819	0.311521
ENSG00000104522.14	0.0022734	0.0188629
ENSG00000104524.12	0.00534463	0.077296
ENSG00000104529.16	0.00109906	0.370577
ENSG00000104635.12	0.000481701	0.835082
ENSG00000104679.9	0.00443366	0.560003
ENSG00000104728.14	-0.00185596	0.81434
ENSG00000104731.12	0.00787621	0.284617
ENSG00000104805.14	0.00107665	0.173254
ENSG00000104808.6	0.0738556	0.102277
ENSG00000104823.7	0.000885052	0.618312
ENSG00000104824.15	0.0022782	0.268461
ENSG00000104826.10	0.274033	0.75925
ENSG00000104848.1	-0.105483	0.908677
ENSG00000104852.13	-0.000601098	0.65115
ENSG00000104856.12	-0.00249582	0.651884
ENSG00000104859.13	-0.00455203	0.529682
ENSG00000104863.10	0.0523049	0.106084
ENSG00000104870.11	0.000670664	0.387099
ENSG00000104884.13	0.0111322	0.077627
ENSG00000104889.4	0.0124489	0.00278319
ENSG00000104918.6	0.129942	0.537728
ENSG00000104957.12	0.00913188	0.208043
ENSG00000104964.13	-0.000124694	0.860866
ENSG00000104970.9	-2.22774	0.113279
ENSG00000104972.13	-0.0191002	0.290299
ENSG00000104974.9	-0.270414	0.107301
ENSG00000104976.10	-0.000899559	0.898828
ENSG00000104980.6	0.00901962	0.0345597
ENSG00000104983.7	0.000911057	0.961735
ENSG00000105048.15	-0.00291231	0.299136
ENSG00000105058.10	-0.00148047	0.67015
ENSG00000105063.17	0.00291657	0.225305
ENSG00000105085.9	0.0412894	0.0801564
ENSG00000105122.11	-0.0186814	0.155839
ENSG00000105131.6	0.00536243	0.18112
ENSG00000105136.18	-0.00336385	0.870314
ENSG00000105137.11	0.010035	0.111859
ENSG00000105146.11	-0.381646	0.041673
ENSG00000105176.16	9.76009e-05	0.932336
ENSG00000105197.9	0.00639023	0.00013495
ENSG00000105202.6	0.000475688	0.293002
ENSG00000105219.7	0.00679861	0.313458
ENSG00000105221.15	0.000740628	0.674925
ENSG00000105227.13	-0.0399717	0.112802
ENSG00000105270.13	0.0052691	0.423858
ENSG00000105278.9	-0.00642702	0.842519
ENSG00000105289.13	-0.00746148	0.0248544
ENSG00000105290.10	0.00450462	4.24585e-06
ENSG00000105298.12	0.0132881	0.305845
ENSG00000105321.11	-0.00321313	0.716475
ENSG00000105323.15	0.000743557	0.46692
ENSG00000105325.12	0.00430553	0.402706
ENSG00000105341.17	0.000608183	0.941061
ENSG00000105355.7	0.00631281	0.0125358
ENSG00000105366.14	-0.034204	0.360578
ENSG00000105369.8	-0.00547054	0.279201
ENSG00000105372.5	7.02818e-05	0.699924
ENSG00000105373.17	-0.000616458	0.380946
ENSG00000105374.8	-0.0214106	0.111793
ENSG00000105379.8	0.00477323	0.0110469
ENSG00000105383.13	-0.0123101	0.778583
ENSG00000105402.6	-0.0028578	0.265798
ENSG00000105404.9	0.00262389	0.0290416
ENSG00000105409.14	0.00991623	0.0223776
ENSG00000105419.16	-0.0135775	0.0410485
ENSG00000105447.11	0.0108321	0.0817456
ENSG00000105497.6	-0.0122538	0.560417
ENSG00000105499.12	-0.0022972	0.869179
ENSG00000105523.3	0.00158414	0.794343
ENSG00000105552.13	0.00223969	0.525013
ENSG00000105576.14	0.00568467	0.00237822
ENSG00000105583.8	0.00444437	0.0165837
ENSG00000105607.11	0.00972042	0.142113
ENSG00000105609.15	0.0212817	0.35517
ENSG00000105639.17	-0.0084328	0.28358
ENSG00000105642.14	-0.205082	0.284944
ENSG00000105643.8	0.0058855	0.201326
ENSG00000105647.13	0.0385942	0.612693
ENSG00000105650.20	0.295571	0.0852845
ENSG00000105655.17	-0.000469969	0.805605
ENSG00000105656.11	-0.00946243	0.545038
ENSG00000105668.6	-0.0688879	0.169282
ENSG00000105672.13	0.205922	0.00345041
ENSG00000105695.13	-0.00935894	0.80851
ENSG00000105697.6	-0.0611387	0.438457
ENSG00000105698.14	0.00264405	0.145407
ENSG00000105699.15	0.00077281	0.173496
ENSG00000105700.9	0.00214581	0.512972
ENSG00000105701.14	0.000959374	0.217053
ENSG00000105707.12	-0.000765775	0.762107
ENSG00000105711.9	0.00798976	0.341155
ENSG00000105717.12	-0.0524518	0.562717
ENSG00000105726.15	0.00182512	0.47714
ENSG00000105737.8	-0.00387881	0.920192
ENSG00000105755.6	0.00485766	0.521228
ENSG00000105767.2	-0.0060976	0.187778
ENSG00000105792.18	-0.0869358	0.000545914
ENSG00000105808.16	-0.00424672	0.98102
ENSG00000105829.10	-0.00146587	0.907246
ENSG00000105852.9	-0.0098108	0.264444
ENSG00000105854.11	-0.00243565	0.419703
ENSG00000105856.12	-0.00175283	0.657508
ENSG00000105880.4	0.0140173	0.038961
ENSG00000105894.10	-0.000328818	0.715243
ENSG00000105939.11	0.00920527	0.026682
ENSG00000105953.13	0.00250786	0.193163
ENSG00000105996.6	-0.329247	0.107056
ENSG00000105997.21	-0.0604969	0.133217
ENSG00000106004.4	-0.0227696	0.445498
ENSG00000106006.6	-0.109016	0.530207
ENSG00000106066.12	-0.0108893	0.158077
ENSG00000106077.17	-0.00413628	0.182151
ENSG00000106123.10	0.00100927	0.771026
ENSG00000106153.12	0.000225819	0.733169
ENSG00000106258.12	-0.0025493	0.964706
ENSG00000106261.15	-0.00131798	0.287866
ENSG00000106330.10	0.00576524	0.583296
ENSG00000106333.11	0.000547472	0.000625868
ENSG00000106336.11	0.101802	0.426007
ENSG00000106351.11	-0.0433368	0.00354259
ENSG00000106392.9	0.00472849	0.129009
ENSG00000106479.9	-0.00880543	0.414665
ENSG00000106484.13	0.00074481	0.537185
ENSG00000106511.5	-0.00394799	0.807631
ENSG00000106537.7	-0.000459852	0.301197
ENSG00000106609.15	0.00190338	0.355461
ENSG00000106615.8	0.00316993	0.300962
ENSG00000106628.9	0.00394191	0.00401909
ENSG00000106631.7	-0.0197676	0.605511
ENSG00000106633.14	-0.0834801	0.681016
ENSG00000106682.13	0.000161433	0.917367
ENSG00000106701.10	0.0036206	0.831272
ENSG00000106771.11	0.000525916	0.867835
ENSG00000106785.13	-0.00300725	0.388767
ENSG00000106789.11	-0.00149312	0.612052
ENSG00000106809.9	-0.000344334	0.813238
ENSG00000106823.11	0.000244852	0.965247
ENSG00000106868.15	-0.0127128	0.510391
ENSG00000106927.10	0.00657985	0.0703315
ENSG00000106948.15	-0.00627195	0.196631
ENSG00000106992.16	0.0326814	0.0275713
ENSG00000107020.8	-0.0308555	0.000634527
ENSG00000107021.14	0.00513882	0.525803
ENSG00000107159.11	0.00780944	0.00345371
ENSG00000107281.8	0.0021068	0.0552312
ENSG00000107317.10	0.00134056	0.000763504
ENSG00000107331.15	0.00289188	0.176135
ENSG00000107404.16	0.00392091	0.0679764
ENSG00000107438.7	-0.00210201	0.090132
ENSG00000107521.17	-0.00681465	0.230708
ENSG00000107537.12	0.00458812	0.174804
ENSG00000107566.12	-0.00444968	0.486297
ENSG00000107593.16	-0.201372	0.449087
ENSG00000107611.13	0.0212719	0.427652
ENSG00000107614.20	0.0497287	0.000304176
ENSG00000107625.11	0.00349002	0.6676
ENSG00000107672.13	-0.00196184	0.694756
ENSG00000107738.18	-0.00314107	0.535354
ENSG00000107742.11	-0.00397961	0.211364
ENSG00000107829.12	-0.00906141	0.0301053
ENSG00000107874.9	0.000872082	0.871838
ENSG00000107902.12	0.00923621	0.217663
ENSG00000107951.11	0.0192988	0.000210215
ENSG00000107960.9	-0.00384265	0.780616
ENSG00000108187.14	-0.0301889	0.161905
ENSG00000108219.13	-0.000872975	0.568268
ENSG00000108262.14	0.000364166	0.838226
ENSG00000108309.11	0.00810215	0.0080582
ENSG00000108344.13	-0.000113564	0.706645
ENSG00000108349.13	-0.000680341	0.360863
ENSG00000108352.10	-0.0045243	0.204427
ENSG00000108375.11	-0.00367105	0.309007
ENSG00000108387.13	0.0010505	0.857238
ENSG00000108389.8	-0.00384973	0.246397
ENSG00000108405.3	-0.154154	0.063472
ENSG00000108417.3	-0.853336	0.0100987
ENSG00000108448.19	-0.00258422	0.869423
ENSG00000108468.13	0.00162931	0.212241
ENSG00000108506.10	0.00414969	0.502234
ENSG00000108511.9	-0.00458676	0.489327
ENSG00000108557.16	-0.000676289	0.865226
ENSG00000108578.13	0.00189097	0.428209
ENSG00000108582.10	-0.0012984	0.144264
ENSG00000108587.13	0.00184365	0.596326
ENSG00000108588.12	0.000316392	0.721461
ENSG00000108592.15	-0.000556732	0.785482
ENSG00000108599.13	-0.0150435	0.0893331
ENSG00000108604.14	-0.0005286	0.603475
ENSG00000108622.9	0.00905337	0.640013
ENSG00000108639.6	-0.00024286	0.703383
ENSG00000108651.8	0.00458572	0.27548
ENSG00000108654.10	-0.0009099	0.0710447
ENSG00000108669.15	-0.0132964	0.0201656
ENSG00000108671.8	0.00100189	0.275516
ENSG00000108684.13	-0.0365279	0.384212
ENSG00000108784.8	0.00655304	0.0407346
ENSG00000108785.7	0.247836	0.101342
ENSG00000108786.9	-0.00799699	0.567371
ENSG00000108788.10	0.00399194	0.506276
ENSG00000108799.11	-0.0120747	0.130559
ENSG00000108819.10	-0.00174415	0.433906
ENSG00000108821.12	1.17469e-05	0.3755
ENSG00000108829.9	-6.53838e-05	0.90099
ENSG00000108840.14	0.00695284	0.0242504
ENSG00000108846.14	0.000949896	0.427755
ENSG00000108861.7	-0.000293123	0.940199
ENSG00000108946.13	-0.000134243	0.853428
ENSG00000108947.4	-0.00766026	0.63213
ENSG00000108963.16	-0.0159402	0.303493
ENSG00000108984.12	-0.0403427	0.07621
ENSG00000109047.7	0.308624	0.622492
ENSG00000109061.9	-0.0336485	0.633316
ENSG00000109063.13	-0.185997	0.0633
ENSG00000109089.7	0.00322706	0.33343
ENSG00000109099.12	-0.000354946	0.759331
ENSG00000109101.6	-0.0236397	0.685112
ENSG00000109107.12	0.00232108	0.50025
ENSG00000109118.12	-0.00852532	0.0594442
ENSG00000109181.10	-0.487629	0.397043
ENSG00000109184.13	0.025927	1.12286e-05
ENSG00000109255.10	-0.00433424	0.882712
ENSG00000109270.11	-0.00588072	0.373624
ENSG00000109458.7	0.000245435	0.954695
ENSG00000109654.13	0.00241945	0.0691871
ENSG00000109686.15	-0.000213716	0.954313
ENSG00000109705.7	0.0481495	0.0038121
ENSG00000109743.9	-0.0430986	0.296185
ENSG00000109758.7	-0.15344	0.467485
ENSG00000109790.15	-0.00545726	0.211873
ENSG00000109854.12	0.00443732	0.197526
ENSG00000109881.15	0.00654318	0.130236
ENSG00000109906.12	-0.0656663	0.028436
ENSG00000109917.9	0.00770871	0.217558
ENSG00000109919.8	-0.000461223	0.849417
ENSG00000109920.11	-0.0106412	0.0628702
ENSG00000109943.7	-0.0885997	0.198422
ENSG00000109944.9	0.00253567	0.885226
ENSG00000109971.12	0.000263371	0.16857
ENSG00000110011.12	0.00326432	0.572759
ENSG00000110047.16	0.00378717	0.168854
ENSG00000110075.13	-0.000213331	0.888586
ENSG00000110076.17	0.00916679	0.051655
ENSG00000110090.11	0.000341442	0.75934
ENSG00000110169.9	-0.00242026	0.36272
ENSG00000110171.17	0.00303331	0.502676
ENSG00000110200.7	0.00971522	0.614111
ENSG00000110237.3	-0.00187524	0.571913
ENSG00000110243.10	0.469972	0.395161
ENSG00000110330.7	-0.0019255	0.678801
ENSG00000110344.8	-0.00170517	0.748789
ENSG00000110455.12	-0.00446713	0.780734
ENSG00000110492.14	-6.94415e-06	0.989389
ENSG00000110497.13	-0.0170898	0.0372568
ENSG00000110619.15	0.000988158	0.858927
ENSG00000110651.10	0.000847352	0.0261204
ENSG00000110719.8	0.00244659	0.0097255
ENSG00000110723.10	0.00721689	0.422464
ENSG00000110786.16	-0.0111449	0.964213
ENSG00000110799.12	-0.000180836	0.819728
ENSG00000110811.18	0.00533681	0.00414285
ENSG00000110841.12	6.76698e-05	0.980373
ENSG00000110881.10	0.0306144	0.00144786
ENSG00000110917.6	-0.000308059	0.745125
ENSG00000110925.5	-0.00790424	0.121966
ENSG00000110934.9	-0.00910497	0.436579
ENSG00000110955.7	0.000602734	0.172843
ENSG00000111077.16	-0.000384229	0.879219
ENSG00000111087.8	-0.125528	0.117759
ENSG00000111181.11	0.0107071	0.340535
ENSG00000111196.8	0.00371765	0.624622
ENSG00000111229.14	0.00138088	0.247495
ENSG00000111266.7	-0.00172166	0.359549
ENSG00000111269.2	-0.00874447	0.0254244
ENSG00000111276.9	-0.00175575	0.403002
ENSG00000111300.8	0.0108471	0.0635504
ENSG00000111319.11	-0.00167009	0.169822
ENSG00000111321.9	0.0020112	0.174456
ENSG00000111331.11	-0.00117135	0.174226
ENSG00000111335.11	-0.00110104	0.202237
ENSG00000111348.7	-0.00175153	0.0358681
ENSG00000111405.7	0.0207943	0.691306
ENSG00000111424.9	0.00281205	0.478356
ENSG00000111445.12	0.0117396	0.2515
ENSG00000111490.11	-0.00833881	0.284117
ENSG00000111602.10	0.000346421	0.920275
ENSG00000111615.11	-0.00830022	0.201645
ENSG00000111641.9	-4.4623e-05	0.987106
ENSG00000111642.13	0.000276221	0.814545
ENSG00000111644.6	-0.155062	0.113695
ENSG00000111652.8	-0.00242835	0.524917
ENSG00000111664.9	0.0200944	0.671616
ENSG00000111669.13	0.000337592	0.355562
ENSG00000111670.13	0.00260939	0.32172
ENSG00000111676.13	5.2987e-05	0.964394
ENSG00000111679.15	-0.00628549	0.172518
ENSG00000111684.9	-0.0135752	0.148541
ENSG00000111716.11	0.000247355	0.353755
ENSG00000111801.14	-0.0115605	0.0809691
ENSG00000111837.10	-0.120467	0.0472231
ENSG00000111846.14	0.00398464	0.181529
ENSG00000111850.9	0.0419444	0.210669
ENSG00000111860.12	-0.0260308	0.321719
ENSG00000111911.6	-0.00362979	0.432314
ENSG00000111981.4	0.0469457	0.0161865
ENSG00000112031.14	0.0219286	0.432559
ENSG00000112039.3	2.27882e-05	0.998988
ENSG00000112159.10	0.000550934	0.739222
ENSG00000112195.8	-0.276434	0.211841
ENSG00000112200.15	0.0033642	0.542987
ENSG00000112208.11	0.0178214	0.0249409
ENSG00000112212.10	-0.116809	0.889176
ENSG00000112242.13	0.00469877	0.225402
ENSG00000112299.7	-0.0219824	0.522287
ENSG00000112303.12	0.00131314	0.942956
ENSG00000112308.11	-0.000171484	0.892225
ENSG00000112319.16	0.00488087	0.708916
ENSG00000112343.10	-0.00982143	0.113453
ENSG00000112357.11	-0.00295232	0.832954
ENSG00000112486.13	-0.891369	0.0499823
ENSG00000112494.8	0.103854	0.595971
ENSG00000112499.11	0.306363	0.151915
ENSG00000112511.16	-0.00805328	0.152468
ENSG00000112584.12	-0.00348195	0.553732
ENSG00000112640.13	0.00191075	0.3767
ENSG00000112655.14	0.00110153	0.065028
ENSG00000112658.7	0.000885327	0.744776
ENSG00000112667.11	0.00857202	0.0183265
ENSG00000112701.16	0.00205664	0.555489
ENSG00000112759.15	0.000359692	0.398245
ENSG00000112763.14	-0.0137234	0.262953
ENSG00000112852.6	0.0185373	0.00219404
ENSG00000112874.8	-0.00782633	0.294484
ENSG00000112893.8	-0.0021101	0.459981
ENSG00000112941.11	0.0102294	0.0626321
ENSG00000112964.12	0.0013097	0.804584
ENSG00000113070.7	0.00101112	0.918719
ENSG00000113088.5	-0.0300501	0.0874791
ENSG00000113194.11	0.00119669	0.729737
ENSG00000113205.4	0.0288398	0.000457851
ENSG00000113209.8	0.00534978	0.624633
ENSG00000113211.5	0.00632592	0.724715
ENSG00000113212.6	0.0111882	0.567163
ENSG00000113262.13	0.288865	0.0300502
ENSG00000113269.12	-0.00167747	0.632049
ENSG00000113272.12	0.00597234	0.766597
ENSG00000113273.14	0.010059	0.289407
ENSG00000113300.10	0.000345995	0.930603
ENSG00000113312.9	0.00479225	0.389113
ENSG00000113387.10	-0.00128786	0.115238
ENSG00000113460.11	0.00461592	0.274772
ENSG00000113520.9	-5.83924	0.0341681
ENSG00000113552.14	-0.000222772	0.971265
ENSG00000113569.14	0.00353434	0.197479
ENSG00000113594.8	-0.00998723	0.0236058
ENSG00000113621.13	0.00267023	0.584493
ENSG00000113638.11	0.00186127	0.942611
ENSG00000113643.7	0.00311739	0.45139
ENSG00000113658.15	-0.00106392	0.765903
ENSG00000113716.11	-0.00348269	0.516099
ENSG00000113719.14	-0.000469458	0.394686
ENSG00000113722.15	0.0410599	0.582947
ENSG00000113732.7	2.67395e-05	0.985085
ENSG00000113758.12	0.004337	0.00211492
ENSG00000113811.9	-0.00680731	0.369365
ENSG00000113812.12	-0.0190033	0.174671
ENSG00000113851.12	-0.00856989	0.354181
ENSG00000113966.8	0.0193291	0.725089
ENSG00000114019.13	-0.00421135	0.196264
ENSG00000114021.10	0.00337363	0.473384
ENSG00000114026.20	0.00154908	0.922887
ENSG00000114030.11	0.00164038	0.753509
ENSG00000114126.16	-0.00811237	0.157537
ENSG00000114127.9	-0.00160201	0.736632
ENSG00000114251.12	-0.00438981	0.252168
ENSG00000114268.10	0.0102231	0.38622
ENSG00000114270.14	-0.00303619	0.547771
ENSG00000114315.3	-0.00225721	0.393465
ENSG00000114331.11	0.00412397	0.268062
ENSG00000114353.15	-0.000987418	0.349925
ENSG00000114378.15	0.0311444	0.000844924
ENSG00000114383.8	-0.0220453	0.0309753
ENSG00000114391.11	0.000247886	0.446674
ENSG00000114491.12	0.0077449	0.265136
ENSG00000114520.9	-0.00655341	0.384019
ENSG00000114529.11	-0.00543944	0.423411
ENSG00000114544.14	0.0102884	0.0272959
ENSG00000114626.16	-0.00113322	0.879704
ENSG00000114646.8	-0.0138769	0.687046
ENSG00000114654.7	-0.00666352	0.597548
ENSG00000114686.7	0.000754537	0.768251
ENSG00000114744.7	0.00447699	0.384434
ENSG00000114770.15	0.00139848	0.288789
ENSG00000114771.12	-0.0555389	0.683825
ENSG00000114854.6	0.0105943	0.812005
ENSG00000114867.18	0.000972327	0.102528
ENSG00000114904.11	-0.0279925	0.00762968
ENSG00000114956.18	0.00478136	0.349211
ENSG00000114993.14	0.00710433	0.0540227
ENSG00000115008.5	0.0759802	0.373727
ENSG00000115009.10	-0.0133611	0.553444
ENSG00000115041.11	0.0212316	5.64386e-05
ENSG00000115053.14	0.000289098	0.518832
ENSG00000115204.13	0.00362384	0.496051
ENSG00000115226.8	0.0287116	0.0546097
ENSG00000115266.10	0.0470201	0.141139
ENSG00000115268.8	0.000340633	0.484295
ENSG00000115275.10	0.00667676	0.0427288
ENSG00000115286.18	0.00907428	0.0157065
ENSG00000115289.11	0.0244057	0.14463
ENSG00000115318.10	0.0126281	0.505624
ENSG00000115364.12	0.0101392	0.0305821
ENSG00000115504.13	0.00629908	0.116995
ENSG00000115507.8	0.0303893	0.00133882
ENSG00000115520.7	-0.00301375	0.714901
ENSG00000115524.14	-0.00163269	0.158986
ENSG00000115590.12	0.000720878	0.961889
ENSG00000115594.10	0.00125705	0.343694
ENSG00000115596.3	0.0257622	0.0612859
ENSG00000115598.8	0.104093	0.00016396
ENSG00000115607.8	-0.227211	0.124795
ENSG00000115648.12	-0.00102219	0.0332625
ENSG00000115649.14	-0.000950514	0.804719
ENSG00000115657.11	0.0116591	0.612099
ENSG00000115750.15	-0.00549079	0.739855
ENSG00000115760.12	0.00166149	0.279034
ENSG00000115808.10	0.00777847	0.0108427
ENSG00000115841.18	-0.0906988	0.246368
ENSG00000115850.8	0.034695	0.239117
ENSG00000115902.9	-0.00397428	0.014718
ENSG00000115904.11	0.00501142	0.0986661
ENSG00000115935.15	-0.00228108	0.393933
ENSG00000115998.6	0.0205987	0.582724
ENSG00000116001.14	0.00378021	0.242665
ENSG00000116014.8	0.0115607	0.690301
ENSG00000116017.9	0.0184105	0.180251
ENSG00000116030.15	0.00141227	0.56914
ENSG00000116031.8	-0.0115041	0.353612
ENSG00000116032.5	0.106549	0.398864
ENSG00000116035.2	-0.00713643	0.821317
ENSG00000116039.10	-0.00189404	0.472539
ENSG00000116095.9	-0.00246165	0.857187
ENSG00000116161.16	0.00253001	0.19547
ENSG00000116176.6	-3.84963e-05	0.997325
ENSG00000116199.10	-0.000612879	0.773719
ENSG00000116251.8	-0.00111315	0.240773
ENSG00000116254.16	0.0191303	0.0510784
ENSG00000116266.9	-0.00738282	0.22009
ENSG00000116396.12	0.00998093	0.119471
ENSG00000116478.10	-0.000823456	0.722782
ENSG00000116489.11	0.00260443	0.0996816
ENSG00000116525.12	-0.00483976	0.749643
ENSG00000116544.10	0.0256324	0.560298
ENSG00000116584.16	0.000782173	0.613377
ENSG00000116604.16	0.000194366	0.943426
ENSG00000116649.8	0.00337944	0.0389888
ENSG00000116675.14	0.0109034	0.284402
ENSG00000116678.17	-0.00600754	0.540616
ENSG00000116685.14	0.0019553	0.398784
ENSG00000116688.15	-0.00475289	0.0969233
ENSG00000116691.9	0.00469121	0.381549
ENSG00000116729.12	-0.00290551	0.248914
ENSG00000116741.7	-0.000845281	0.667237
ENSG00000116748.18	-0.0246716	0.866413
ENSG00000116752.5	-0.00372164	0.628023
ENSG00000116761.10	-0.00244371	0.954326
ENSG00000116771.5	-0.0314037	0.588677
ENSG00000116786.10	0.00429732	0.357147
ENSG00000116815.14	0.00141605	0.838416
ENSG00000116857.15	0.000776762	0.520446
ENSG00000116885.17	-0.048767	0.00538854
ENSG00000116898.10	0.00342784	0.117614
ENSG00000116957.11	0.00767368	0.169228
ENSG00000116962.13	0.00137874	0.238076
ENSG00000117000.8	0.0082244	0.274051
ENSG00000117016.8	0.0312866	4.44669e-05
ENSG00000117069.13	0.00275528	0.447762
ENSG00000117118.8	0.000266221	0.954651
ENSG00000117122.12	0.00816043	3.58827e-06
ENSG00000117148.7	0.00282741	0.19323
ENSG00000117153.14	-0.0023627	0.533967
ENSG00000117154.10	-0.00175003	0.773359
ENSG00000117155.15	-0.00188475	0.739524
ENSG00000117222.12	-0.00306925	0.61916
ENSG00000117245.11	-0.0864609	0.459302
ENSG00000117305.13	-0.00674777	0.283803
ENSG00000117308.13	0.000722918	0.844099
ENSG00000117318.8	0.00549036	0.0109334
ENSG00000117322.15	-0.000667514	0.896348
ENSG00000117360.11	0.00371596	0.194195
ENSG00000117407.15	0.00742239	0.588436
ENSG00000117410.12	0.00175275	0.122852
ENSG00000117411.15	0.00588505	0.00814937
ENSG00000117425.12	-0.01368	0.725766
ENSG00000117481.9	0.00555554	0.623854
ENSG00000117533.13	9.25166e-05	0.992661
ENSG00000117586.9	0.0202574	0.151502
ENSG00000117594.8	-0.00475647	0.875565
ENSG00000117595.9	0.000420006	0.606962
ENSG00000117682.15	0.0022423	0.790852
ENSG00000117713.16	-0.00328264	0.117378
ENSG00000117751.16	0.00125506	0.876759
ENSG00000117758.12	-0.00519732	0.411138
ENSG00000117791.14	-0.0123078	0.21342
ENSG00000117859.17	0.00185757	0.468239
ENSG00000117899.9	-0.00202741	0.654793
ENSG00000117971.10	-0.0148502	0.872264
ENSG00000118017.3	0.633354	0.615269
ENSG00000118094.10	-0.185437	0.698538
ENSG00000118113.10	0.0219114	0.745397
ENSG00000118156.11	0.00411183	0.907759
ENSG00000118160.12	-0.0155447	0.494906
ENSG00000118200.13	0.00390791	0.139774
ENSG00000118242.14	-0.00635881	0.139988
ENSG00000118292.7	0.0270739	0.266621
ENSG00000118402.5	0.0126513	0.313652
ENSG00000118412.11	0.000163207	0.972256
ENSG00000118473.20	0.032387	0.00755588
ENSG00000118496.4	-0.00362015	0.666252
ENSG00000118620.11	-0.0132078	0.581372
ENSG00000118762.6	-0.0028249	0.717551
ENSG00000118816.8	-0.000875583	0.172497
ENSG00000118873.14	-0.000486783	0.888482
ENSG00000118961.13	0.0228545	0.116299
ENSG00000119041.9	0.00375006	0.554361
ENSG00000119231.9	0.00864745	0.147327
ENSG00000119326.13	0.00166426	0.836632
ENSG00000119333.10	0.00116233	0.467515
ENSG00000119335.15	0.00113578	0.096894
ENSG00000119392.13	-0.000319132	0.945701
ENSG00000119403.12	0.00537233	0.274662
ENSG00000119414.10	0.000791749	0.813579
ENSG00000119431.8	0.0021991	0.740129
ENSG00000119535.16	-0.00296631	0.441262
ENSG00000119547.5	0.00287962	0.759001
ENSG00000119559.14	0.0111907	0.135601
ENSG00000119574.11	0.0128335	0.221775
ENSG00000119640.7	0.00249349	0.939938
ENSG00000119673.13	-0.0140115	0.159577
ENSG00000119681.10	0.000119071	0.881054
ENSG00000119684.14	-0.00648888	0.630446
ENSG00000119689.13	0.0027546	0.461176
ENSG00000119718.9	0.00602668	0.575578
ENSG00000119737.5	-0.00506723	0.962317
ENSG00000119777.17	0.00413006	0.0209668
ENSG00000119820.9	0.00910728	0.00172411
ENSG00000119919.10	0.0887062	0.37507
ENSG00000119922.8	0.000278628	0.840193
ENSG00000119943.9	-0.0264262	0.141284
ENSG00000119977.19	-0.00683183	0.207167
ENSG00000120029.11	-0.00534133	0.626386
ENSG00000120049.17	0.00393751	0.762403
ENSG00000120068.6	-0.00496543	0.686689
ENSG00000120075.5	0.00572778	0.350461
ENSG00000120088.13	0.0128745	0.320903
ENSG00000120093.10	0.000940562	0.645099
ENSG00000120094.6	-0.307598	0.298733
ENSG00000120129.5	-0.000669714	0.33661
ENSG00000120156.19	-0.00677114	0.55019
ENSG00000120210.6	0.227064	0.0187576
ENSG00000120289.11	-0.0293522	0.612488
ENSG00000120306.8	-0.00559718	0.383234
ENSG00000120318.14	0.0234618	0.047194
ENSG00000120322.3	0.019931	0.337948
ENSG00000120324.6	0.0553511	0.0329084
ENSG00000120327.6	0.0292924	0.022224
ENSG00000120328.6	0.0717681	0.214027
ENSG00000120437.8	-0.00601708	0.385655
ENSG00000120440.12	0.263703	0.191432
ENSG00000120451.9	-0.000643894	0.830072
ENSG00000120669.14	0.0502788	0.283318
ENSG00000120686.10	-0.000497776	0.892246
ENSG00000120693.12	-0.0124632	0.668471
ENSG00000120696.8	0.00605444	0.592523
ENSG00000120697.7	-0.00168869	0.825127
ENSG00000120709.9	0.00647719	0.32125
ENSG00000120727.11	-0.006917	0.126522
ENSG00000120733.12	-0.00408505	0.14004
ENSG00000120738.7	-0.000401781	0.308504
ENSG00000120784.14	0.0195336	0.0750401
ENSG00000120875.7	-0.000112935	0.728501
ENSG00000120910.13	-0.0214277	0.293565
ENSG00000120913.22	0.0119947	0.113303
ENSG00000120948.14	-0.00383387	0.395685
ENSG00000120963.10	0.00259454	0.0814167
ENSG00000121089.4	0.0852497	0.160118
ENSG00000121152.8	0.00789491	0.221623
ENSG00000121210.14	0.00457126	0.318448
ENSG00000121211.6	0.0277941	0.23992
ENSG00000121236.18	-0.0235807	0.382161
ENSG00000121318.2	0.0761631	0.937003
ENSG00000121361.3	-0.000248104	0.964721
ENSG00000121406.7	0.00700727	0.561078
ENSG00000121413.11	-0.00168631	0.728847
ENSG00000121417.12	-0.0217235	0.308448
ENSG00000121542.10	0.0241831	0.282308
ENSG00000121552.3	-0.000543363	0.871214
ENSG00000121570.11	-0.50603	0.57127
ENSG00000121653.10	0.0041019	0.470207
ENSG00000121671.10	-0.0130466	0.0161328
ENSG00000121680.14	-0.00582911	0.503071
ENSG00000121690.8	0.0586306	0.157473
ENSG00000121691.4	-0.00104511	0.665232
ENSG00000121716.17	-0.000376133	0.976376
ENSG00000121775.16	0.0211495	0.0779419
ENSG00000121807.5	-0.00829563	0.580606
ENSG00000121864.8	0.00641698	0.123279
ENSG00000121903.13	-0.0302204	0.534182
ENSG00000121904.16	0.0168561	0.252338
ENSG00000121940.14	0.00357698	0.706548
ENSG00000122012.12	-0.159204	0.343907
ENSG00000122068.11	0.00012225	0.966791
ENSG00000122085.15	-0.00907258	0.519714
ENSG00000122133.15	-0.015492	0.560224
ENSG00000122176.10	-0.000232613	0.654383
ENSG00000122367.18	-0.00424962	0.951714
ENSG00000122375.10	1.47139	0.000997703
ENSG00000122386.9	0.000672028	0.945378
ENSG00000122406.11	9.82368e-05	0.703565
ENSG00000122417.14	-0.00277789	0.642642
ENSG00000122477.11	0.131795	0.288247
ENSG00000122490.17	0.00785334	0.0255412
ENSG00000122547.9	0.0089214	0.60826
ENSG00000122642.9	0.00219021	0.0905787
ENSG00000122694.14	0.00299027	0.103436
ENSG00000122756.13	0.0100576	0.142098
ENSG00000122877.12	-0.00664398	0.186678
ENSG00000122884.11	0.00109986	0.400433
ENSG00000122912.13	-0.0181302	0.0511461
ENSG00000122958.13	0.00687982	0.0348407
ENSG00000122971.7	-0.0031715	0.664356
ENSG00000122986.12	-0.0157763	0.525672
ENSG00000123144.9	0.00292334	0.122933
ENSG00000123159.14	0.00172826	0.243566
ENSG00000123178.13	0.0301048	0.130832
ENSG00000123201.13	0.0551933	0.197951
ENSG00000123268.7	-0.00503835	0.734931
ENSG00000123297.15	0.000468811	0.908612
ENSG00000123338.11	-0.00556265	0.171811
ENSG00000123342.14	0.00312841	0.692719
ENSG00000123349.12	-0.000946064	0.417918
ENSG00000123352.16	0.00397783	0.576387
ENSG00000123358.18	-0.000319576	0.724477
ENSG00000123360.10	0.0439492	0.0152263
ENSG00000123384.12	0.000215487	0.569578
ENSG00000123388.4	0.00449536	0.664977
ENSG00000123395.13	0.0030442	0.708258
ENSG00000123407.3	0.0161169	0.00203045
ENSG00000123411.13	-0.0576325	0.0437297
ENSG00000123416.14	0.00027087	0.759613
ENSG00000123453.15	-0.00863078	0.611284
ENSG00000123595.6	0.00291936	0.671472
ENSG00000123609.9	-0.000595369	0.93086
ENSG00000123689.5	0.00401516	0.13108
ENSG00000123739.9	0.000446448	0.908504
ENSG00000123838.9	0.000867585	0.717554
ENSG00000123843.11	-0.0273537	0.56343
ENSG00000123870.10	-0.0938116	0.195025
ENSG00000123933.13	0.00292594	0.188958
ENSG00000123975.4	0.00617922	0.0143915
ENSG00000123999.4	-0.00620845	0.749458
ENSG00000124006.13	0.00190346	0.244648
ENSG00000124067.15	-0.000684132	0.9133
ENSG00000124097.7	0.00716535	0.973098
ENSG00000124103.8	-1.56547	0.185519
ENSG00000124134.7	0.0105986	0.515606
ENSG00000124143.9	-0.0167127	0.0336076
ENSG00000124155.15	-0.000354023	0.622725
ENSG00000124193.13	-0.00295183	0.153123
ENSG00000124222.20	-0.000441142	0.880278
ENSG00000124226.9	-0.00225893	0.310407
ENSG00000124256.13	-0.0310946	0.14635
ENSG00000124257.6	0.775929	8.8731e-05
ENSG00000124313.11	0.00431504	0.269034
ENSG00000124333.13	0.00179365	0.697125
ENSG00000124356.14	0.00650225	0.271147
ENSG00000124391.4	-0.00331878	0.989738
ENSG00000124440.14	0.0119173	0.662269
ENSG00000124466.8	0.000827635	0.556354
ENSG00000124486.11	0.00052671	0.663596
ENSG00000124496.11	-0.00623252	0.259205
ENSG00000124508.15	-0.0220128	0.112293
ENSG00000124541.6	0.00414168	0.281697
ENSG00000124549.13	0.00222046	0.975506
ENSG00000124564.16	0.000190324	0.997998
ENSG00000124587.12	0.00279425	0.219612
ENSG00000124588.18	0.0125983	0.00115268
ENSG00000124593.13	-0.0135111	0.51241
ENSG00000124608.4	0.00610511	0.520561
ENSG00000124657.1	-0.368458	0.0667071
ENSG00000124701.5	-0.165717	0.727785
ENSG00000124762.12	0.00156068	0.222107
ENSG00000124766.5	0.00123919	0.0734583
ENSG00000124795.13	9.20548e-05	0.918206
ENSG00000124802.10	0.0152391	0.445025
ENSG00000124812.13	0.819764	0.00697342
ENSG00000124831.17	-0.00169988	0.333488
ENSG00000124875.8	0.0523246	0.00117043
ENSG00000124920.12	0.0266469	0.123823
ENSG00000124942.12	-0.000240051	0.0993934
ENSG00000125046.13	-0.0261635	0.687896
ENSG00000125084.10	-0.584978	0.656093
ENSG00000125089.15	0.0106599	0.330209
ENSG00000125148.6	0.00062121	0.285904
ENSG00000125149.10	-0.003787	0.673496
ENSG00000125249.6	0.00312821	0.175259
ENSG00000125257.12	0.00047349	0.816404
ENSG00000125266.6	0.0018997	0.487908
ENSG00000125319.13	0.0227886	0.372885
ENSG00000125347.12	-0.00576492	0.0339358
ENSG00000125351.9	0.00425045	0.697749
ENSG00000125378.14	0.00247769	0.646678
ENSG00000125414.17	-0.0257674	0.74676
ENSG00000125434.9	-0.00838118	0.415274
ENSG00000125449.5	-0.0198158	0.149104
ENSG00000125498.18	-0.246472	0.750605
ENSG00000125503.11	0.00483508	0.238695
ENSG00000125520.12	5.44207e-05	0.974014
ENSG00000125551.17	-2.38516	0.271168
ENSG00000125611.14	0.00128246	0.850341
ENSG00000125630.14	-7.29393e-05	0.990178
ENSG00000125637.14	-0.00487675	0.111205
ENSG00000125648.13	-0.00375997	0.395787
ENSG00000125650.4	0.0271128	0.661229
ENSG00000125691.11	-0.000116273	0.503511
ENSG00000125730.15	-0.000224301	0.326555
ENSG00000125735.9	-0.0467126	0.370053
ENSG00000125741.4	0.0128439	0.251426
ENSG00000125744.10	0.00434076	0.36542
ENSG00000125746.13	-0.00243681	0.49935
ENSG00000125753.12	0.00399688	0.0272605
ENSG00000125787.10	0.860482	0.255059
ENSG00000125810.9	-0.000724244	0.674003
ENSG00000125820.5	-0.0222598	0.594318
ENSG00000125821.10	0.00286137	0.227412
ENSG00000125826.18	-0.0015549	0.593804
ENSG00000125835.16	0.00192383	0.055971
ENSG00000125841.11	0.00120092	0.73569
ENSG00000125843.9	0.0211393	0.14397
ENSG00000125900.11	0.745019	0.652512
ENSG00000125901.5	0.00557626	0.0810032
ENSG00000125910.5	-0.0396687	0.324753
ENSG00000125912.9	0.00817562	0.00139457
ENSG00000125952.17	-0.000736141	0.872603
ENSG00000125966.9	0.0212261	0.110983
ENSG00000125971.15	-0.000182696	0.89108
ENSG00000126005.14	-0.00229517	0.578845
ENSG00000126012.10	-0.000936112	0.669824
ENSG00000126062.3	0.00234606	0.637946
ENSG00000126091.18	0.0475485	1.13064e-06
ENSG00000126217.19	-0.000247543	0.935093
ENSG00000126218.10	-0.00280343	0.959009
ENSG00000126231.12	0.0509203	0.494321
ENSG00000126233.1	0.0523081	0.00331431
ENSG00000126243.7	0.0394806	7.90424e-06
ENSG00000126246.8	-0.12477	0.159016
ENSG00000126254.10	0.00598765	0.00392127
ENSG00000126266.3	1.33843	0.0826044
ENSG00000126267.7	0.0013688	0.12794
ENSG00000126337.12	-0.475852	0.70394
ENSG00000126391.12	0.00632864	0.0884232
ENSG00000126458.3	0.00247987	0.605279
ENSG00000126467.9	0.160907	0.438834
ENSG00000126562.15	-0.00294564	0.227999
ENSG00000126583.9	-0.240199	0.583364
ENSG00000126602.9	0.00462013	0.12844
ENSG00000126653.14	-0.00232763	0.646448
ENSG00000126698.9	-0.00173544	0.716841
ENSG00000126705.12	0.0106123	0.057864
ENSG00000126709.13	-0.000190727	0.399025
ENSG00000126746.16	-0.0104788	0.318972
ENSG00000126759.11	-0.0784967	0.217417
ENSG00000126767.16	0.00295424	0.65792
ENSG00000126775.8	-0.00897944	0.456524
ENSG00000126787.11	0.0111998	0.0335233
ENSG00000126860.10	-0.00579032	0.701921
ENSG00000126861.4	0.0263334	0.545631
ENSG00000126878.11	0.00177722	0.0725808
ENSG00000126883.15	0.00697561	0.141628
ENSG00000126903.14	0.00831483	0.161424
ENSG00000126950.7	-0.0105721	0.863014
ENSG00000126953.5	0.0349959	0.0754331
ENSG00000127022.13	-4.3098e-05	0.873283
ENSG00000127080.8	0.0114214	0.674717
ENSG00000127081.12	-0.059161	0.139475
ENSG00000127083.7	-0.00635244	0.395025
ENSG00000127191.16	0.0077733	0.125548
ENSG00000127241.15	-0.17402	0.237228
ENSG00000127311.8	-0.0297153	0.130273
ENSG00000127324.7	-0.00378372	0.433672
ENSG00000127337.5	-0.00860043	0.385999
ENSG00000127364.3	0.0511485	0.666982
ENSG00000127366.5	-0.0312259	0.896299
ENSG00000127412.5	-0.871435	0.239315
ENSG00000127511.8	0.000375026	0.939382
ENSG00000127527.12	-0.00516647	0.306653
ENSG00000127533.3	0.0263411	0.163291
ENSG00000127540.10	0.0040853	0.0955873
ENSG00000127578.6	-0.0864738	0.377667
ENSG00000127580.14	-0.00205709	0.858898
ENSG00000127585.10	-0.00192384	0.567759
ENSG00000127603.22	-0.000668769	0.308319
ENSG00000127666.9	0.017315	0.026244
ENSG00000127804.11	-0.00501224	0.569119
ENSG00000127884.4	0.000145923	0.927658
ENSG00000127920.5	0.00568832	0.294478
ENSG00000127928.11	0.133392	0.0769261
ENSG00000127946.15	-0.00243083	0.339889
ENSG00000127957.15	-0.109024	0.307584
ENSG00000128000.14	-0.0110484	0.43354
ENSG00000128016.5	-0.000617395	0.343092
ENSG00000128159.10	-0.00623382	0.326855
ENSG00000128191.12	0.00709739	0.548626
ENSG00000128218.7	-0.0412372	0.49105
ENSG00000128228.4	0.00781953	0.106004
ENSG00000128242.11	-0.228497	0.334482
ENSG00000128245.13	-2.50009e-06	0.998669
ENSG00000128253.12	0.213573	0.533054
ENSG00000128268.11	0.00552597	0.2015
ENSG00000128272.13	0.000854902	0.243767
ENSG00000128283.6	0.00209639	0.0167164
ENSG00000128294.14	-0.00302565	0.635289
ENSG00000128340.13	-0.00319215	0.342769
ENSG00000128394.15	-0.00328659	0.900686
ENSG00000128422.14	0.000119559	0.534004
ENSG00000128482.14	0.103947	0.382458
ENSG00000128510.9	0.00552125	5.21466e-05
ENSG00000128563.12	-0.00384077	0.6946
ENSG00000128564.6	0.0148019	0.118657
ENSG00000128567.15	0.00100267	0.0802014
ENSG00000128578.8	-0.0244149	0.493378
ENSG00000128591.14	-0.000674963	0.915489
ENSG00000128595.15	0.000805906	0.0846328
ENSG00000128596.15	-0.0488969	0.41047
ENSG00000128607.12	0.00226697	0.251841
ENSG00000128609.13	-0.0038558	0.318915
ENSG00000128610.10	0.10223	0.679108
ENSG00000128655.15	-0.0621375	0.265556
ENSG00000128709.11	0.0164246	0.381551
ENSG00000128710.5	0.0277503	0.778616
ENSG00000128713.12	0.20728	0.332103
ENSG00000128714.5	-0.0443761	0.441279
ENSG00000128739.19	0.00340691	0.433565
ENSG00000128805.13	0.0269341	0.0186468
ENSG00000128815.16	-0.0131178	0.145445
ENSG00000128849.10	-0.00422082	0.167359
ENSG00000128881.15	0.000505127	0.977164
ENSG00000128928.7	-0.000141421	0.943692
ENSG00000128944.12	0.0139544	0.0565378
ENSG00000129103.16	-0.000315602	0.686937
ENSG00000129158.9	-0.00221969	0.842631
ENSG00000129167.8	-0.0151704	0.299617
ENSG00000129187.13	0.0049386	0.282717
ENSG00000129204.15	-0.0542458	0.601271
ENSG00000129226.12	0.0273141	0.425865
ENSG00000129295.7	-0.0323463	0.0340915
ENSG00000129315.8	-0.000154375	0.979843
ENSG00000129347.18	0.00593211	0.271035
ENSG00000129354.10	0.00317213	0.0503753
ENSG00000129355.6	0.00787583	0.484607
ENSG00000129450.7	-0.00893558	0.855459
ENSG00000129451.10	0.00132825	0.224124
ENSG00000129460.14	-0.0178908	0.123574
ENSG00000129480.11	-0.00457791	0.729939
ENSG00000129636.11	0.00211994	0.329213
ENSG00000129646.12	-0.00323599	0.809708
ENSG00000129691.14	-0.000538857	0.618559
ENSG00000129744.2	-0.180958	0.727634
ENSG00000129749.3	-0.110411	0.573588
ENSG00000129757.11	0.000862217	0.920245
ENSG00000129910.6	-0.0044412	0.876197
ENSG00000129911.7	0.0175494	0.0284843
ENSG00000129946.9	-0.00191928	0.751546
ENSG00000129988.5	0.000283516	0.616932
ENSG00000129991.11	-0.106273	0.0645963
ENSG00000129993.13	-0.00281136	0.691608
ENSG00000130005.10	-0.000630101	0.842811
ENSG00000130158.12	0.0186155	0.000814693
ENSG00000130177.13	0.000307875	0.932278
ENSG00000130201.6	0.0672245	0.0471335
ENSG00000130203.8	0.000458064	0.00805967
ENSG00000130208.8	0.000238861	0.857464
ENSG00000130255.11	0.000119098	0.664663
ENSG00000130270.15	-0.00841355	0.724438
ENSG00000130287.12	-0.00176898	0.5539
ENSG00000130307.10	0.00748667	0.866514
ENSG00000130309.9	0.00229183	0.0528312
ENSG00000130312.5	0.00709975	0.188628
ENSG00000130377.12	0.00370215	0.993178
ENSG00000130402.10	0.000755474	0.0246966
ENSG00000130414.10	0.00200524	0.515946
ENSG00000130427.2	0.00428207	0.764855
ENSG00000130433.6	0.0109922	0.00744651
ENSG00000130475.13	-0.0194284	0.299226
ENSG00000130489.11	0.0102638	0.0403997
ENSG00000130508.9	0.00121687	0.0183311
ENSG00000130511.14	0.00430472	0.355889
ENSG00000130513.6	-0.00326008	0.343282
ENSG00000130517.12	-0.00872313	0.162723
ENSG00000130518.15	-0.0265555	0.202228
ENSG00000130545.14	0.0056359	0.651804
ENSG00000130561.15	-0.114186	0.595772
ENSG00000130595.15	-0.00224577	0.892762
ENSG00000130598.14	-0.0313799	0.481652
ENSG00000130600.14	0.00121185	0.446082
ENSG00000130640.12	0.000913105	0.841338
ENSG00000130643.7	0.142794	0.188855
ENSG00000130684.12	-0.0388402	0.530661
ENSG00000130695.12	0.00340129	0.644645
ENSG00000130702.12	0.00130637	0.0669479
ENSG00000130703.14	0.00177605	0.581982
ENSG00000130706.11	0.00260081	0.054921
ENSG00000130713.14	0.0167199	0.108116
ENSG00000130714.14	0.00794601	0.354273
ENSG00000130717.11	0.0118444	0.152728
ENSG00000130720.11	0.0282845	1.50579e-05
ENSG00000130723.16	0.00178675	0.131855
ENSG00000130762.13	-0.00470128	0.583505
ENSG00000130779.18	-0.000526367	0.82639
ENSG00000130783.12	-0.323563	0.507197
ENSG00000130787.12	0.00319522	0.288342
ENSG00000130812.9	0.388522	0.137788
ENSG00000130827.6	0.00187326	0.475382
ENSG00000130830.13	-0.00103783	0.912566
ENSG00000130844.15	0.00196485	0.849213
ENSG00000130881.12	0.00709656	0.00100574
ENSG00000130943.6	0.0346216	0.869443
ENSG00000130957.4	0.0945188	0.671598
ENSG00000130958.10	-0.00780353	0.630998
ENSG00000130985.15	0.000708406	0.173833
ENSG00000130997.15	-0.0459757	0.341093
ENSG00000131015.4	0.0944369	0.000135779
ENSG00000131043.10	-0.00356048	0.479014
ENSG00000131050.9	-0.0892752	0.643329
ENSG00000131116.10	0.0041003	0.484382
ENSG00000131127.12	-0.0384818	0.199375
ENSG00000131153.7	0.00255869	0.65139
ENSG00000131174.4	0.00347208	0.126454
ENSG00000131183.9	0.53596	0.319609
ENSG00000131187.8	0.0212102	4.76824e-07
ENSG00000131188.10	0.0454737	0.000201614
ENSG00000131203.11	-0.00752555	0.140414
ENSG00000131263.11	0.00417344	0.161385
ENSG00000131368.6	0.00407703	0.276175
ENSG00000131379.8	-0.1831	0.763005
ENSG00000131381.11	-0.00135456	0.842458
ENSG00000131389.15	0.00184326	0.474433
ENSG00000131398.12	-0.0121712	0.145767
ENSG00000131408.12	0.00579701	0.136132
ENSG00000131409.11	-0.199825	0.263561
ENSG00000131446.14	0.00230842	0.223767
ENSG00000131459.11	0.00364659	0.512051
ENSG00000131469.11	0.000206458	0.557073
ENSG00000131471.5	0.00117712	0.6254
ENSG00000131475.5	0.000663191	0.869623
ENSG00000131584.17	0.00533784	0.193473
ENSG00000131591.16	0.0137399	0.24044
ENSG00000131747.13	-0.000216739	0.645592
ENSG00000131748.14	0.000325325	0.638224
ENSG00000131759.16	-0.000881545	0.401245
ENSG00000131771.12	-2.88494e-06	0.986332
ENSG00000131788.14	-0.00159293	0.653514
ENSG00000131885.15	0.289299	0.59703
ENSG00000131914.9	0.0152947	0.038241
ENSG00000131966.12	0.00568569	0.351645
ENSG00000131969.13	-0.0174229	0.431986
ENSG00000132004.11	0.0139854	0.18601
ENSG00000132010.14	0.0526336	0.770969
ENSG00000132155.10	0.00258217	0.354468
ENSG00000132185.15	-0.0211825	0.453573
ENSG00000132196.12	-0.0290085	0.067871
ENSG00000132205.9	0.00368798	0.637479
ENSG00000132326.10	-0.0162977	0.0156738
ENSG00000132356.10	0.00115926	0.726669
ENSG00000132382.13	0.00373933	0.249382
ENSG00000132386.9	0.000884488	0.251526
ENSG00000132388.11	-7.50235e-05	0.988678
ENSG00000132405.17	-0.00108142	0.875743
ENSG00000132406.10	-0.011314	0.416185
ENSG00000132464.10	0.51822	0.420226
ENSG00000132467.3	0.000243859	0.975845
ENSG00000132510.9	0.00260514	0.602685
ENSG00000132535.17	0.0062249	0.605264
ENSG00000132554.18	-0.00630179	0.476814
ENSG00000132561.12	-0.000652705	0.777527
ENSG00000132563.14	0.0102586	0.205699
ENSG00000132570.13	-0.00916861	0.642063
ENSG00000132604.9	0.00922642	0.314947
ENSG00000132612.15	0.0082226	0.0463843
ENSG00000132613.13	0.0081456	0.0558756
ENSG00000132670.19	-0.0036739	0.244736
ENSG00000132676.14	-0.000251805	0.87185
ENSG00000132677.11	0.0190664	0.607822
ENSG00000132680.9	-0.000370117	0.929838
ENSG00000132681.15	-0.0259749	0.152701
ENSG00000132688.10	0.000345485	0.304292
ENSG00000132698.12	4.07769e-05	0.979925
ENSG00000132744.6	-0.0434063	0.457642
ENSG00000132746.13	-0.00050135	0.412021
ENSG00000132749.9	0.000296133	0.894653
ENSG00000132768.12	0.00679914	0.228152
ENSG00000132793.10	-0.0134569	0.27551
ENSG00000132832.8	-0.0743197	0.8067
ENSG00000132855.4	0.0769826	0.200034
ENSG00000132881.10	-0.0733034	0.268642
ENSG00000132912.11	-0.00183152	0.501777
ENSG00000132953.15	0.00241563	0.690865
ENSG00000133048.11	-0.000105123	0.752441
ENSG00000133055.7	-0.127528	0.512146
ENSG00000133067.16	0.000264509	0.921955
ENSG00000133103.15	0.00529857	0.510769
ENSG00000133104.11	-0.00838116	0.0867565
ENSG00000133121.19	-0.0246695	0.00202185
ENSG00000133135.12	-0.0200816	0.116266
ENSG00000133138.18	0.00629998	0.589189
ENSG00000133142.16	-0.00142312	0.0984759
ENSG00000133169.5	-0.00124398	0.62109
ENSG00000133193.11	-0.0160258	0.1961
ENSG00000133195.10	-0.00187906	0.282954
ENSG00000133243.7	0.00667629	0.0141332
ENSG00000133246.10	-0.115677	0.107761
ENSG00000133250.12	0.0200281	0.243519
ENSG00000133265.9	0.00420205	0.227792
ENSG00000133275.14	0.00731858	0.0517992
ENSG00000133392.15	8.61705e-05	0.913029
ENSG00000133393.11	0.000973855	0.864141
ENSG00000133422.11	0.00342003	0.354916
ENSG00000133466.12	0.00472125	0.0446622
ENSG00000133488.13	0.109031	0.049425
ENSG00000133519.11	-0.00707575	0.82352
ENSG00000133612.17	0.00437281	0.14646
ENSG00000133624.12	-0.0382814	0.0899082
ENSG00000133627.16	0.008358	0.162396
ENSG00000133657.13	0.00116005	0.345662
ENSG00000133687.14	0.00488512	0.0130766
ENSG00000133706.16	0.00173666	0.424326
ENSG00000133789.13	-0.00689163	0.0470038
ENSG00000133816.12	0.00119986	0.438772
ENSG00000133818.11	0.00830559	0.390993
ENSG00000133835.13	-0.0039598	0.0380002
ENSG00000133884.8	0.00512755	0.260436
ENSG00000133961.18	-0.00550405	0.279987
ENSG00000133962.6	-0.0177013	0.502679
ENSG00000133983.13	-0.00547471	0.654795
ENSG00000134049.4	0.00248819	0.515747
ENSG00000134056.10	0.00511516	0.728476
ENSG00000134057.13	0.00580957	0.0137664
ENSG00000134058.9	0.00546668	0.564201
ENSG00000134070.4	-0.0139194	0.544965
ENSG00000134138.18	0.00290516	0.786826
ENSG00000134160.12	-0.782464	0.657263
ENSG00000134184.11	-0.000742516	0.627344
ENSG00000134201.9	-0.00351891	0.694067
ENSG00000134202.9	-0.00160243	0.0598346
ENSG00000134216.17	-0.0407574	0.742005
ENSG00000134222.15	0.0109325	0.196416
ENSG00000134242.14	-0.00979811	0.619473
ENSG00000134243.10	-0.000472263	0.697359
ENSG00000134245.16	0.0509165	0.00643352
ENSG00000134285.9	0.00551244	0.186254
ENSG00000134287.8	-0.000895782	0.383117
ENSG00000134313.13	0.00067589	0.792084
ENSG00000134318.12	0.00211109	0.284009
ENSG00000134323.10	0.0112496	0.215668
ENSG00000134330.17	-0.00489274	0.600628
ENSG00000134333.12	0.000248641	0.323794
ENSG00000134339.7	-0.00424707	0.520961
ENSG00000134375.9	0.00427555	0.112481
ENSG00000134398.11	0.0277938	0.224712
ENSG00000134419.14	-0.000163957	0.726378
ENSG00000134460.14	0.017605	0.0298366
ENSG00000134480.12	-0.00701394	0.560222
ENSG00000134489.6	-1.3315	0.347894
ENSG00000134539.15	0.000784993	0.974415
ENSG00000134545.12	-0.344724	0.12274
ENSG00000134571.9	-0.53011	0.535633
ENSG00000134612.10	-0.0185491	0.939736
ENSG00000134686.15	0.0048561	0.0524732
ENSG00000134762.15	0.00121227	0.00631894
ENSG00000134780.8	-0.0449428	0.0438258
ENSG00000134815.17	0.00460155	0.565227
ENSG00000134827.6	-0.00122711	0.382988
ENSG00000134830.5	-0.00845513	0.19261
ENSG00000134853.10	0.000513094	0.744005
ENSG00000134884.12	-0.00287175	0.491994
ENSG00000134899.16	-0.00363964	0.733013
ENSG00000134962.6	-0.0103807	0.79047
ENSG00000135040.14	0.0116626	0.213909
ENSG00000135047.13	0.000963738	0.574408
ENSG00000135070.12	0.0141379	0.117969
ENSG00000135083.13	-0.0162672	0.450426
ENSG00000135093.11	0.000220736	0.985262
ENSG00000135114.11	-0.000147146	0.965794
ENSG00000135144.6	-0.0095104	0.711235
ENSG00000135245.9	0.00204566	0.48255
ENSG00000135248.14	0.0302863	0.932517
ENSG00000135249.6	0.0113077	0.300597
ENSG00000135250.15	-0.00228737	0.50153
ENSG00000135253.12	0.135798	0.0160605
ENSG00000135317.11	-0.00368733	0.399704
ENSG00000135324.5	0.0189985	0.203369
ENSG00000135372.7	0.00243862	0.17069
ENSG00000135387.18	0.000222943	0.676321
ENSG00000135390.16	0.000325885	0.706332
ENSG00000135392.14	-0.00761263	0.444788
ENSG00000135407.9	-0.00934637	0.690318
ENSG00000135409.9	0.114362	0.783766
ENSG00000135413.7	-0.000945935	0.772895
ENSG00000135436.7	0.0422239	0.824934
ENSG00000135439.10	-0.00102722	0.962333
ENSG00000135452.8	-0.0106887	0.0695559
ENSG00000135457.8	-0.00618799	0.401118
ENSG00000135476.10	0.00558344	0.362875
ENSG00000135477.10	0.0234423	0.330771
ENSG00000135482.5	-0.00595199	0.827757
ENSG00000135503.11	-0.00791444	0.0653274
ENSG00000135506.14	-4.04374e-05	0.957281
ENSG00000135537.15	0.0388137	0.165986
ENSG00000135596.16	-0.00622516	0.249245
ENSG00000135605.11	8.85548e-06	0.999914
ENSG00000135625.7	0.0273891	0.564093
ENSG00000135632.10	0.00478773	0.532454
ENSG00000135702.13	1.14832	0.200351
ENSG00000135740.15	0.000184422	0.996334
ENSG00000135747.10	0.119584	0.577154
ENSG00000135821.15	-0.00045571	0.00395024
ENSG00000135828.10	-0.0168599	0.186511
ENSG00000135829.15	-2.31414e-05	0.987367
ENSG00000135835.9	-0.0393716	0.452436
ENSG00000135838.12	-0.00507255	0.596233
ENSG00000135916.14	0.00146	0.329782
ENSG00000135919.11	-0.00246527	0.248721
ENSG00000135924.14	0.00158616	0.415733
ENSG00000135925.7	-0.0116199	0.668009
ENSG00000135929.7	-0.00734383	0.0162742
ENSG00000136040.7	-0.0013442	0.730812
ENSG00000136045.10	0.00761115	0.183112
ENSG00000136059.13	-0.00541997	0.783024
ENSG00000136098.15	-0.00107964	0.967419
ENSG00000136100.11	-0.00291404	0.632225
ENSG00000136114.14	-0.0127745	0.721727
ENSG00000136147.15	-0.00826978	0.319692
ENSG00000136193.15	1.3452e-06	0.999163
ENSG00000136197.11	0.116699	0.697811
ENSG00000136238.16	0.00128636	0.150762
ENSG00000136240.8	0.00129143	0.0165168
ENSG00000136243.15	-0.00315865	0.687488
ENSG00000136250.10	-0.0182425	0.207225
ENSG00000136271.9	0.00553339	0.138748
ENSG00000136273.10	0.0108071	0.409535
ENSG00000136279.17	0.00462615	0.0621428
ENSG00000136286.13	-0.0142178	0.276604
ENSG00000136327.6	0.537548	0.001903
ENSG00000136381.11	0.00528284	0.100152
ENSG00000136404.14	-0.108829	0.0690888
ENSG00000136444.8	-0.00629473	0.210284
ENSG00000136463.7	0.00478457	0.411912
ENSG00000136485.13	-0.000855313	0.52862
ENSG00000136492.7	-0.00577649	0.534606
ENSG00000136535.13	-0.19178	0.421073
ENSG00000136560.12	-0.0107168	0.0977909
ENSG00000136574.16	0.00523292	0.690711
ENSG00000136603.12	0.00084607	0.329965
ENSG00000136628.16	0.000895805	0.222522
ENSG00000136631.11	0.00744282	0.0800127
ENSG00000136682.13	-0.0257194	0.303094
ENSG00000136688.9	0.201059	0.127795
ENSG00000136695.13	0.0400325	0.612307
ENSG00000136731.11	0.00128545	0.456267
ENSG00000136783.9	0.0212526	0.0156193
ENSG00000136807.10	0.000928525	0.700894
ENSG00000136811.15	0.00285754	0.417914
ENSG00000136819.13	0.0056225	0.284014
ENSG00000136826.13	-0.00112619	0.743596
ENSG00000136827.11	0.0111306	0.116326
ENSG00000136828.17	-0.00648386	0.573684
ENSG00000136840.17	0.00787151	0.118912
ENSG00000136842.12	0.00923983	0.64102
ENSG00000136856.16	0.00163555	0.848929
ENSG00000136877.13	0.000701917	0.836797
ENSG00000136881.10	0.627086	0.633727
ENSG00000136883.11	-0.00257656	0.233177
ENSG00000136895.17	-0.00706249	0.688508
ENSG00000136908.16	0.00500947	0.075945
ENSG00000136928.4	-0.00504044	0.552573
ENSG00000136931.8	-0.87016	0.315092
ENSG00000136932.12	-0.0280104	0.324964
ENSG00000136982.5	0.0141438	0.0827007
ENSG00000137038.7	0.00807752	0.093829
ENSG00000137054.14	0.00827436	0.0804886
ENSG00000137078.7	-0.0506692	0.170975
ENSG00000137090.10	-0.0602975	0.581474
ENSG00000137098.12	-0.142502	0.182583
ENSG00000137100.14	0.00756598	0.159891
ENSG00000137135.16	0.0208023	0.218647
ENSG00000137145.19	0.0034716	0.0123427
ENSG00000137154.11	9.35206e-05	0.341668
ENSG00000137161.15	0.00153335	0.535503
ENSG00000137171.13	-0.00528436	0.53372
ENSG00000137203.9	0.000474625	0.679148
ENSG00000137207.10	0.00160497	0.157947
ENSG00000137218.9	0.0259313	0.369467
ENSG00000137221.13	-0.00148828	0.844219
ENSG00000137270.10	-0.115302	0.35449
ENSG00000137274.11	0.00806194	0.510075
ENSG00000137275.12	-0.00403053	0.59421
ENSG00000137288.8	-0.0026681	0.568575
ENSG00000137331.11	-0.001627	0.146629
ENSG00000137337.13	-0.00125279	0.759025
ENSG00000137338.5	-0.024213	0.347562
ENSG00000137343.16	-0.0140225	0.350485
ENSG00000137404.13	0.00777728	0.264986
ENSG00000137414.5	-0.00579528	0.181869
ENSG00000137460.7	0.000680998	0.917278
ENSG00000137463.4	0.0613174	0.736223
ENSG00000137474.18	0.000413319	0.951496
ENSG00000137486.15	-0.00110462	0.753594
ENSG00000137496.16	-0.0157949	0.145169
ENSG00000137501.15	-0.000361821	0.700114
ENSG00000137504.12	0.00414327	0.107091
ENSG00000137513.8	-0.00809757	0.307003
ENSG00000137547.7	0.00603788	0.0007373
ENSG00000137558.6	-4.55299e-05	0.887993
ENSG00000137561.4	-0.0724639	0.355292
ENSG00000137563.10	0.00247357	0.306546
ENSG00000137648.15	-0.00448147	0.385756
ENSG00000137675.4	-1.29893	0.06054
ENSG00000137692.10	0.00581299	0.316441
ENSG00000137709.8	-0.0161108	0.390505
ENSG00000137713.14	0.0117067	0.00935991
ENSG00000137745.10	0.00366051	8.82749e-05
ENSG00000137752.21	-0.0122056	0.170185
ENSG00000137757.9	-0.123798	0.667516
ENSG00000137802.12	-0.00312321	0.807096
ENSG00000137815.13	-0.00188502	0.588473
ENSG00000137817.15	0.000982703	0.81639
ENSG00000137818.10	-9.04042e-05	0.49521
ENSG00000137825.9	0.0141769	0.664484
ENSG00000137831.13	0.00137873	0.656081
ENSG00000137843.10	0.76603	0.000475252
ENSG00000137845.13	-0.000207086	0.927478
ENSG00000137875.4	0.0919016	0.279416
[truncated: 6,095 more rows]

## Sheet: CG.DFI.COAD
Gene	Coefficient	Logrank p-value
ENSG00000000460.15	-0.0405983	0.408532
ENSG00000000938.11	-0.0275298	0.410537
ENSG00000001167.13	0.00376091	0.829623
ENSG00000001617.10	0.00373794	0.503494
ENSG00000002834.16	0.00171551	0.0850063
ENSG00000003096.12	-0.0106746	0.605929
ENSG00000003393.13	0.0103049	0.699026
ENSG00000003400.13	-0.0442553	0.010258
ENSG00000003402.18	-0.00237063	0.718352
ENSG00000003989.15	0.00465015	0.85102
ENSG00000004660.13	0.00384574	0.879562
ENSG00000004779.8	-0.00624925	0.325546
ENSG00000004809.12	-0.391875	0.712795
ENSG00000004838.12	-0.699669	0.23156
ENSG00000004975.10	0.00937573	0.58226
ENSG00000005059.14	-0.0516148	0.0480991
ENSG00000005075.14	0.00172637	0.826796
ENSG00000005187.10	-0.00708271	0.59946
ENSG00000005189.18	0.120288	0.0479545
ENSG00000005249.11	-0.150389	0.0305823
ENSG00000005339.11	0.00590619	0.331503
ENSG00000005379.14	0.00673462	0.218129
ENSG00000005486.15	0.0010129	0.819322
ENSG00000005801.15	0.0141215	0.265963
ENSG00000005961.16	0.0785915	0.784537
ENSG00000005981.11	0.0420738	0.791938
ENSG00000006047.11	0.0201094	0.146179
ENSG00000006062.12	0.0353087	0.144162
ENSG00000006071.10	-0.137074	0.668797
ENSG00000006210.6	0.00477257	0.059827
ENSG00000006282.18	0.00595422	0.130791
ENSG00000006283.16	0.16729	0.583382
ENSG00000006327.12	-0.00161756	0.776652
ENSG00000006534.14	0.003756	0.6629
ENSG00000006607.12	-0.00499339	0.648409
ENSG00000006659.11	-1.21181	0.580289
ENSG00000006704.9	0.00979682	0.10324
ENSG00000006744.17	-0.000250207	0.973772
ENSG00000006756.14	0.00309355	0.405823
ENSG00000006757.10	0.00348847	0.724408
ENSG00000007038.9	0.0143695	0.178549
ENSG00000007047.13	-0.00161326	0.947675
ENSG00000007080.9	-0.00168775	0.747972
ENSG00000007168.11	-0.000725565	0.920373
ENSG00000007216.13	0.000625433	0.948184
ENSG00000007237.17	-0.00849179	0.560969
ENSG00000007264.12	0.036539	0.542299
ENSG00000007312.11	-0.0442994	0.619906
ENSG00000007314.10	0.653553	0.0479486
ENSG00000007341.17	-0.0397487	0.548476
ENSG00000007392.15	0.0348778	0.000482299
ENSG00000007402.10	-0.019247	0.495016
ENSG00000007516.12	0.0368189	0.348646
ENSG00000007541.13	-0.00304762	0.731588
ENSG00000007933.11	-0.308345	0.308401
ENSG00000008056.11	0.0979129	0.275655
ENSG00000008130.14	-0.00517381	0.509471
ENSG00000008283.14	0.00122951	0.72443
ENSG00000008516.15	-0.244436	0.0589961
ENSG00000008517.15	0.000131853	0.941478
ENSG00000008853.15	0.0110837	0.624772
ENSG00000009724.15	-0.260108	0.402743
ENSG00000010256.9	-0.000533118	0.589583
ENSG00000010319.5	0.0175344	0.478991
ENSG00000010322.14	0.0132485	0.0395516
ENSG00000010327.9	-0.0025995	0.650253
ENSG00000010379.14	0.127333	0.866763
ENSG00000010539.10	0.0265885	0.560955
ENSG00000010610.8	-0.0208466	0.0802383
ENSG00000010626.13	-0.0290723	0.732204
ENSG00000010704.17	-0.0406014	0.37495
ENSG00000011083.7	-0.0258681	0.656392
ENSG00000011143.15	0.0687306	0.128891
ENSG00000011304.15	-0.000850338	0.648758
ENSG00000011376.8	0.00809202	0.445722
ENSG00000011422.10	0.000660051	0.862002
ENSG00000011451.16	0.00379918	0.673723
ENSG00000011485.13	-0.00462064	0.563929
ENSG00000011523.12	0.00714843	0.664565
ENSG00000012061.14	-0.0144612	0.37433
ENSG00000012124.13	-0.00337115	0.949941
ENSG00000012211.11	0.00177059	0.938677
ENSG00000012504.12	0.0124567	0.85535
ENSG00000012817.14	0.00997996	0.286967
ENSG00000012983.10	0.00187221	0.886529
ENSG00000013275.6	-0.00131043	0.796038
ENSG00000013306.14	-0.00128079	0.467898
ENSG00000013441.14	0.0209816	0.0161957
ENSG00000013561.16	-0.0101933	0.476167
ENSG00000013588.5	6.71382e-05	0.904523
ENSG00000014138.7	-0.00594082	0.727889
ENSG00000014216.14	0.000781965	0.492044
ENSG00000014824.12	-0.00773489	0.295712
ENSG00000015285.9	-0.0699132	0.175989
ENSG00000015520.13	0.0102538	0.381317
ENSG00000015676.16	0.00114265	0.820697
ENSG00000016402.11	-0.0171443	0.238734
ENSG00000016864.15	-0.0139858	0.487714
ENSG00000017483.13	-0.00440208	0.189665
ENSG00000018280.15	-0.0120503	0.531619
ENSG00000018408.13	-0.00172726	0.836149
ENSG00000018625.13	0.0275149	0.284386
ENSG00000018699.10	0.0129617	0.582551
ENSG00000019102.10	-0.00121897	0.807165
ENSG00000019505.6	-0.00183361	0.749353
ENSG00000019995.6	0.0113395	0.830897
ENSG00000020181.16	1.56133e-05	0.998017
ENSG00000020426.9	0.0298572	0.469524
ENSG00000020633.17	0.0131415	0.34542
ENSG00000021300.12	0.0100393	0.0123911
ENSG00000021461.15	-0.0729415	0.954412
ENSG00000021488.11	0.0973608	0.16045
ENSG00000021762.18	0.00376115	0.6948
ENSG00000021776.9	-0.00969594	0.449852
ENSG00000022277.11	0.00368636	0.305763
ENSG00000022556.14	-0.0533965	0.158677
ENSG00000023330.13	0.00432201	0.465768
ENSG00000023445.12	-0.0205926	0.053633
ENSG00000023572.7	-0.0680956	0.216511
ENSG00000023608.4	-0.0540083	0.56381
ENSG00000023892.10	0.0236015	0.152615
ENSG00000023902.12	-0.013821	0.348253
ENSG00000023909.8	-0.00653123	0.76733
ENSG00000024422.10	-0.0017358	0.692769
ENSG00000025039.13	-0.0175776	0.540657
ENSG00000025293.14	0.00248656	0.792763
ENSG00000025800.12	-0.0090924	0.326117
ENSG00000026950.15	-0.0157349	0.203898
ENSG00000027847.12	0.000824373	0.930103
ENSG00000028277.19	-0.0724819	0.33887
ENSG00000029153.13	-0.0369282	0.0508307
ENSG00000029363.14	0.0017138	0.715912
ENSG00000029534.18	0.0129008	0.85611
ENSG00000029559.6	-0.0120946	0.932157
ENSG00000029993.13	0.0082515	0.0471651
ENSG00000030110.11	-0.0134897	0.184471
ENSG00000031081.9	-0.0302389	0.204042
ENSG00000033050.6	-0.000432099	0.954638
ENSG00000033100.13	0.00665668	0.350813
ENSG00000033327.11	0.0045269	0.752793
ENSG00000033867.15	-0.0137232	0.410085
ENSG00000034510.5	-0.000196098	0.489996
ENSG00000035141.6	0.00608053	0.504171
ENSG00000035862.11	-0.000568846	0.65133
ENSG00000036054.11	-0.00884436	0.589362
ENSG00000036448.8	-0.081585	0.566892
ENSG00000036530.7	-0.549363	0.525252
ENSG00000037280.14	0.00198926	0.936662
ENSG00000037757.12	-0.0202782	0.397751
ENSG00000037965.5	-0.128542	0.695424
ENSG00000038358.13	0.0156114	0.0917018
ENSG00000038532.13	0.0308932	0.0532256
ENSG00000039068.17	0.0014985	0.0511766
ENSG00000039987.5	0.0195132	0.555595
ENSG00000040199.17	-0.0101001	0.676159
ENSG00000040633.11	-0.0128426	0.459406
ENSG00000041357.14	-0.00138042	0.708037
ENSG00000041802.9	0.0257405	0.141825
ENSG00000041982.13	-0.000921328	0.596273
ENSG00000042062.10	-0.169057	0.211042
ENSG00000042286.13	0.0101768	0.344823
ENSG00000042753.10	-0.00297625	0.49
ENSG00000043143.19	0.00515778	0.610612
ENSG00000044090.7	0.0148469	0.00294323
ENSG00000044446.10	0.00920187	0.248121
ENSG00000046774.9	-0.311918	0.646424
ENSG00000047457.12	-0.0594957	0.449899
ENSG00000047597.5	-0.0182665	0.127247
ENSG00000047617.13	-0.776949	0.133339
ENSG00000047634.13	0.00635467	0.223525
ENSG00000047849.20	0.00105581	0.715566
ENSG00000048544.5	-0.00806093	0.490005
ENSG00000049192.13	-0.00442019	0.938856
ENSG00000049245.11	-0.02259	0.00140274
ENSG00000049246.13	0.0293454	0.264881
ENSG00000049656.12	0.00571632	0.0824088
ENSG00000049769.11	-0.021259	0.881341
ENSG00000050405.12	-0.00313852	0.201689
ENSG00000050555.16	-0.0507815	0.435742
ENSG00000050748.16	-0.0302874	0.134269
ENSG00000050767.14	-0.10958	0.684563
ENSG00000051382.7	0.00564835	0.6381
ENSG00000051825.13	-0.0735565	0.0542597
ENSG00000052344.14	0.00193793	0.037951
ENSG00000053254.14	-0.00897098	0.384429
ENSG00000053438.8	0.053251	0.300251
ENSG00000053501.11	0.0011937	0.946988
ENSG00000053900.9	0.00187938	0.95438
ENSG00000054118.12	-0.002409	0.643778
ENSG00000054179.10	0.00730231	0.246574
ENSG00000054219.10	0.0117296	0.240043
ENSG00000054392.11	-0.0350681	0.69834
ENSG00000054598.6	0.0298361	0.143786
ENSG00000054938.14	0.00701655	0.333153
ENSG00000054965.9	0.00290893	0.805374
ENSG00000054967.11	-0.0173525	0.66676
ENSG00000054983.15	0.00541844	0.483189
ENSG00000055211.11	-0.0166157	0.413844
ENSG00000055483.18	0.0101739	0.223348
ENSG00000055917.14	0.00104072	0.824744
ENSG00000055955.14	-1.14429	0.357644
ENSG00000055957.9	0.00626195	0.996257
ENSG00000056558.9	0.0189701	0.396877
ENSG00000056586.14	-0.00656905	0.549214
ENSG00000057252.11	-0.0203436	0.135165
ENSG00000057468.6	-1.3245	0.183436
ENSG00000057593.12	-0.0043154	0.912095
ENSG00000058453.15	0.00312467	0.875413
ENSG00000058600.14	0.0260296	0.000430221
ENSG00000058673.14	0.00238304	0.618272
ENSG00000058729.9	0.00252678	0.912075
ENSG00000059145.17	0.0237454	0.42376
ENSG00000059573.7	0.00315712	0.418724
ENSG00000059915.15	0.0114799	0.38521
ENSG00000060140.7	-0.0356134	0.400442
ENSG00000060558.3	-0.0769696	0.0232671
ENSG00000060642.9	-0.0729021	0.038399
ENSG00000061273.16	0.00736332	0.369111
ENSG00000062524.14	0.0379636	0.112478
ENSG00000062822.11	0.00341868	0.613192
ENSG00000063015.18	-0.255336	0.614485
ENSG00000063046.16	-0.000102228	0.951449
ENSG00000063127.14	-0.28226	0.524462
ENSG00000063241.6	-0.00154874	0.788714
ENSG00000063244.11	0.000967109	0.744923
ENSG00000064012.20	-0.0124599	0.428091
ENSG00000064201.14	-0.154309	0.550751
ENSG00000064218.4	0.0974479	0.367056
ENSG00000064313.10	-0.00827599	0.561083
ENSG00000064545.13	0.00124734	0.854102
ENSG00000064547.12	0.00732544	0.57319
ENSG00000064601.15	-0.00150947	0.295716
ENSG00000064652.9	-0.0312547	0.636401
ENSG00000064666.13	-0.0012672	0.672899
ENSG00000064687.11	0.00568819	0.538388
ENSG00000064886.12	-0.53969	0.0885135
ENSG00000064961.17	-0.00781611	0.261285
ENSG00000064999.13	0.0108538	0.368692
ENSG00000065029.13	0.0140674	0.317115
ENSG00000065060.15	0.00131429	0.946539
ENSG00000065268.9	-0.00645107	0.326766
ENSG00000065328.15	-0.00736915	0.808472
ENSG00000065371.16	-0.281748	0.782354
ENSG00000065615.12	-0.0170406	0.306321
ENSG00000065665.19	0.0268884	0.626007
ENSG00000065717.13	0.00478022	0.0755571
ENSG00000065802.10	0.0278261	0.213393
ENSG00000065978.16	-5.22421e-05	0.96013
ENSG00000066084.11	0.0056578	0.507632
ENSG00000066117.13	0.0240698	0.0169822
ENSG00000066279.15	-0.00468018	0.694959
ENSG00000066336.10	-0.0165968	0.334321
ENSG00000066379.13	0.00243699	0.859781
ENSG00000066422.4	-0.00662452	0.784436
ENSG00000066629.15	0.0224267	0.403464
ENSG00000066651.16	-0.00011161	0.997195
ENSG00000066654.11	-0.000254713	0.981044
ENSG00000066926.9	-0.0812446	0.0298306
ENSG00000067177.13	-0.0151411	0.429109
ENSG00000067182.6	-0.00959738	0.0706773
ENSG00000067191.14	0.0561594	0.0241934
ENSG00000067225.16	0.000293505	0.381386
ENSG00000067334.12	0.00486181	0.679584
ENSG00000067596.9	0.00920333	0.460077
ENSG00000067829.17	0.00105707	0.540361
ENSG00000067840.11	0.0977963	0.366351
ENSG00000067900.6	-0.0137754	0.23041
ENSG00000067955.12	-0.00394999	0.648125
ENSG00000067992.11	-0.0435009	0.158559
ENSG00000068001.12	0.00137882	0.785374
ENSG00000068079.6	0.00214843	0.792396
ENSG00000068120.13	0.00249774	0.645673
ENSG00000068137.13	0.0186329	0.449709
ENSG00000068308.12	0.00778463	0.17867
ENSG00000068400.12	0.0298589	0.00429339
ENSG00000068615.15	-0.0147127	0.545649
ENSG00000068724.14	0.00779203	0.501611
ENSG00000068745.13	0.0130334	0.0609678
ENSG00000068781.19	-0.195326	0.919567
ENSG00000068831.17	0.00666699	0.936306
ENSG00000069399.11	-0.00466019	0.366134
ENSG00000069493.13	-0.117813	0.201435
ENSG00000069712.10	-0.00669881	0.93458
ENSG00000069956.10	-0.0092439	0.327432
ENSG00000069966.17	0.0213379	0.482528
ENSG00000070214.14	-0.00582235	0.106156
ENSG00000070404.8	0.0053595	0.490661
ENSG00000070444.13	0.00844025	0.615913
ENSG00000070476.13	0.022682	0.328963
ENSG00000070601.8	0.0253665	0.760638
ENSG00000070729.12	0.317837	0.54438
ENSG00000070731.8	-0.0786527	0.139024
ENSG00000070785.15	-0.00121925	0.960808
ENSG00000070808.14	-0.710202	0.31828
ENSG00000070831.14	-0.00673775	0.0199258
ENSG00000070915.8	-0.296678	0.745805
ENSG00000070950.8	-2.04877e-05	0.999201
ENSG00000071127.15	0.000635407	0.563098
ENSG00000071203.8	0.00203156	0.791693
ENSG00000071564.13	0.00144665	0.692617
ENSG00000071626.15	-0.00467619	0.333416
ENSG00000071655.16	-0.0028681	0.653445
ENSG00000071859.13	0.00159306	0.614783
ENSG00000071889.15	0.00197917	0.513736
ENSG00000072042.11	-0.00443071	0.536456
ENSG00000072062.12	-0.00188838	0.870561
ENSG00000072134.14	-0.0026161	0.921609
ENSG00000072195.13	0.019501	0.185956
ENSG00000072415.7	-0.0241342	0.197359
ENSG00000072736.17	-0.027037	0.309165
ENSG00000072818.10	0.00943896	0.635808
ENSG00000072832.13	0.0314042	0.509286
ENSG00000072858.9	-0.029969	0.221809
ENSG00000072958.7	0.00996056	0.235524
ENSG00000073008.13	0.0117066	0.090069
ENSG00000073146.14	-0.136146	0.768503
ENSG00000073150.12	-0.646284	0.20832
ENSG00000073464.10	0.0255974	0.288127
ENSG00000073670.12	-0.360832	0.502007
ENSG00000073711.9	-0.0462738	0.316354
ENSG00000073734.8	-0.566491	0.499531
ENSG00000073737.15	-0.0037504	0.70502
ENSG00000073905.8	-0.796296	0.171787
ENSG00000074266.16	0.00751199	0.809577
ENSG00000074319.11	0.00924544	0.141757
ENSG00000074370.16	0.000119796	0.941813
ENSG00000074527.10	-0.0146122	0.534514
ENSG00000074590.12	-0.013209	0.5103
ENSG00000074660.14	-0.0262483	0.595597
ENSG00000074842.6	-0.00170218	0.47263
ENSG00000074966.9	-0.155704	0.650017
ENSG00000075340.21	0.0367986	0.778131
ENSG00000075426.10	-0.00034808	0.901123
ENSG00000076003.4	-0.00042496	0.945405
ENSG00000076043.8	-0.0228329	0.0555684
ENSG00000076067.10	-0.0255433	0.112238
ENSG00000076108.10	0.00516511	0.239246
ENSG00000076248.9	-0.00829973	0.244329
ENSG00000076258.8	0.0808951	0.493943
ENSG00000076321.9	-0.0323094	0.491801
ENSG00000076554.14	-0.000837535	0.714228
ENSG00000076555.14	0.0415004	0.0292265
ENSG00000076650.5	0.0836671	0.0656475
ENSG00000076706.13	-0.000892728	0.806013
ENSG00000076864.18	-0.000829149	0.820402
ENSG00000076928.16	0.00354787	0.0998029
ENSG00000077009.12	-1.5819	0.714118
ENSG00000077044.8	0.00410031	0.521569
ENSG00000077147.13	-0.000422936	0.771328
ENSG00000077279.15	0.738986	0.366544
ENSG00000077454.14	0.0237376	0.460981
ENSG00000077498.8	0.451214	0.0638168
ENSG00000077616.9	-0.125717	0.735977
ENSG00000077713.17	0.015766	0.300715
ENSG00000077782.18	0.00200458	0.794501
ENSG00000078070.10	0.0121543	0.531761
ENSG00000078081.6	-0.0262343	0.428855
ENSG00000078124.10	-0.0677378	0.00621158
ENSG00000078142.10	-0.0551419	0.0516085
ENSG00000078319.8	-0.0251203	0.7163
ENSG00000078399.14	0.00920058	0.0813863
ENSG00000078596.9	-0.0504141	0.273613
ENSG00000078747.11	-0.000310248	0.956936
ENSG00000078898.6	-0.0513704	0.91562
ENSG00000079246.14	0.000480585	0.761352
ENSG00000079277.18	-0.00441547	0.887847
ENSG00000079313.10	-0.000371035	0.966096
ENSG00000079335.16	-0.131376	0.110666
ENSG00000079337.14	-0.00417443	0.903787
ENSG00000079387.12	-0.022939	0.476972
ENSG00000079432.6	0.00343448	0.653157
ENSG00000079459.11	-0.000291738	0.827656
ENSG00000079616.11	0.0099257	0.172885
ENSG00000079805.15	-0.00066981	0.711058
ENSG00000079950.12	-0.00381465	0.694515
ENSG00000079999.12	-0.000407763	0.920014
ENSG00000080224.16	0.00382948	0.994971
ENSG00000080644.14	0.0244233	0.701376
ENSG00000080854.13	0.0500922	0.464428
ENSG00000081051.6	0.0103738	0.858355
ENSG00000081148.11	-1.29995	0.256945
ENSG00000081154.10	-0.00150523	0.767233
ENSG00000081181.6	-0.071037	0.296268
ENSG00000081248.9	-0.278872	0.635059
ENSG00000081307.11	0.00286511	0.878255
ENSG00000081692.11	-0.0165605	0.591832
ENSG00000081760.15	0.00784188	0.375898
ENSG00000081800.7	-1.21223	0.451794
ENSG00000081803.14	0.000121775	0.992791
ENSG00000081818.3	0.111315	0.452113
ENSG00000081853.14	0.00175244	0.989232
ENSG00000082068.7	0.00978765	0.588453
ENSG00000082074.14	-0.0864522	0.0350553
ENSG00000082126.16	-3.02001	0.325012
ENSG00000082153.16	-0.00255264	0.545801
ENSG00000082269.15	-0.000330229	0.974448
ENSG00000082397.14	0.0062816	0.472979
ENSG00000082512.13	0.00959004	0.086344
ENSG00000082781.10	0.00251235	0.432492
ENSG00000083099.9	-0.0200655	0.281616
ENSG00000083123.13	-0.0148692	0.407006
ENSG00000083223.16	-0.0126665	0.381688
ENSG00000083444.15	0.000528623	0.864405
ENSG00000083642.17	0.00256055	0.738195
ENSG00000083782.6	-0.14478	0.313445
ENSG00000083807.8	-0.0292033	0.245076
ENSG00000083812.10	0.00544372	0.93272
ENSG00000083838.14	0.142933	0.0673268
ENSG00000083844.9	-0.0131576	0.442457
ENSG00000083845.7	-0.000319182	0.212382
ENSG00000083896.11	0.0114366	0.414021
ENSG00000084092.6	-0.0297458	0.0330059
ENSG00000084652.14	-0.00949011	0.291572
ENSG00000084693.14	0.00876157	0.610964
ENSG00000084764.9	0.00179463	0.924324
ENSG00000085063.13	-0.00281885	0.349133
ENSG00000085117.10	0.00555984	0.219421
ENSG00000085274.14	-0.036771	0.298067
ENSG00000085377.12	0.00197127	0.633194
ENSG00000085433.14	-0.0226427	0.734633
ENSG00000085465.12	0.00227693	0.968306
ENSG00000085552.15	0.00872182	0.474959
ENSG00000085644.12	-0.0021021	0.878792
ENSG00000085662.12	-0.00604333	0.590794
ENSG00000085831.14	0.00589445	0.37173
ENSG00000085832.15	-0.0203501	0.0832101
ENSG00000085978.20	-0.00409135	0.804169
ENSG00000085998.12	-0.000312051	0.970562
ENSG00000086015.19	0.00515291	0.439154
ENSG00000086159.11	0.20651	0.227234
ENSG00000086475.13	0.00168138	0.893606
ENSG00000086506.2	0.384547	0.00977263
ENSG00000086589.10	-0.00499589	0.752519
ENSG00000086619.12	0.00787043	0.717828
ENSG00000086730.15	-0.0197023	0.645376
ENSG00000086848.13	-0.00124003	0.987556
ENSG00000086967.9	0.500729	0.198414
ENSG00000087008.14	0.00553274	0.855683
ENSG00000087076.7	0.0327968	0.734901
ENSG00000087077.10	0.00231802	0.527431
ENSG00000087085.12	-0.0038555	0.838274
ENSG00000087086.12	-7.73887e-05	0.652246
ENSG00000087087.17	0.0050083	0.273694
ENSG00000087088.18	-0.00242856	0.597983
ENSG00000087111.19	-0.0030118	0.756999
ENSG00000087152.14	0.0101177	0.323225
ENSG00000087191.11	0.00357183	0.409212
ENSG00000087237.9	-0.322143	0.352424
ENSG00000087245.11	-0.000669273	0.442652
ENSG00000087253.10	0.00638394	0.285799
ENSG00000087266.14	-0.00994632	0.346606
ENSG00000087274.15	-0.000833289	0.865591
ENSG00000087338.4	-0.0204559	0.295869
ENSG00000087502.16	-0.0137495	0.334863
ENSG00000087589.15	-0.29455	0.128584
ENSG00000087995.14	-0.0472166	0.144669
ENSG00000088002.10	0.00824005	0.319524
ENSG00000088205.11	0.00383272	0.418552
ENSG00000088247.14	0.00198761	0.448688
ENSG00000088256.7	-0.00140343	0.696913
ENSG00000088280.17	-0.0419592	0.223968
ENSG00000088367.19	0.00514308	0.166768
ENSG00000088538.12	-0.0265255	0.905684
ENSG00000088826.16	0.0262699	0.00544843
ENSG00000088827.11	-0.017677	0.511665
ENSG00000088899.13	0.0090621	0.0321638
ENSG00000088926.12	0.416728	0.00688315
ENSG00000089012.13	-0.527318	0.0210815
ENSG00000089041.15	-0.137063	0.199933
ENSG00000089057.13	0.00270994	0.903858
ENSG00000089063.13	-0.00355353	0.449241
ENSG00000089101.16	-4.35187	0.0548339
ENSG00000089127.11	0.0012123	0.618898
ENSG00000089169.13	-0.112548	0.833788
ENSG00000089280.17	0.00249241	0.141089
ENSG00000089351.13	0.0126957	0.015119
ENSG00000089558.7	-0.39822	0.256729
ENSG00000089597.15	0.00170209	0.285171
ENSG00000089639.9	0.00145967	0.919833
ENSG00000089685.13	-0.0095112	0.117011
ENSG00000089692.7	-0.0415222	0.499166
ENSG00000089775.10	-0.0687159	0.165796
ENSG00000090006.16	-0.000157919	0.940059
ENSG00000090097.19	0.02048	0.0421351
ENSG00000090263.14	-9.08573e-05	0.990636
ENSG00000090316.14	-0.00452748	0.477312
ENSG00000090382.5	-0.000205314	0.49246
ENSG00000090447.10	0.00719168	0.693365
ENSG00000090470.13	-0.0211831	0.570175
ENSG00000090512.10	-1.27382	0.542921
ENSG00000090554.11	0.218191	0.505049
ENSG00000090615.11	-0.000843987	0.878217
ENSG00000090621.12	-0.000373891	0.932384
ENSG00000090659.16	-0.0743316	0.163402
ENSG00000090674.14	0.000269183	0.988877
ENSG00000090686.14	-0.0200588	0.157685
ENSG00000090863.10	-0.000274363	0.919342
ENSG00000090924.13	0.00317736	0.779002
ENSG00000090932.9	0.460041	0.000137228
ENSG00000090975.11	-0.0318658	0.275819
ENSG00000091039.15	-0.00669753	0.360733
ENSG00000091073.18	0.000980059	0.879033
ENSG00000091106.17	-0.517365	0.0891932
ENSG00000091317.7	-0.000330321	0.93076
ENSG00000091490.9	0.00215993	0.487888
ENSG00000091513.13	0.0252931	0.564076
ENSG00000091536.15	-0.0603265	0.816472
ENSG00000091542.8	-0.00668305	0.457356
ENSG00000091844.6	-0.161499	0.441546
ENSG00000091947.8	-0.00224526	0.815578
ENSG00000092010.13	-0.00313175	0.129692
ENSG00000092054.12	0.0120701	0.975931
ENSG00000092067.5	-1.9876	0.0808277
ENSG00000092068.17	0.00104283	0.776617
ENSG00000092096.13	0.00736711	0.883518
ENSG00000092108.19	-0.0132715	0.316859
ENSG00000092140.13	-0.0167196	0.450307
ENSG00000092199.16	-0.000808962	0.599254
ENSG00000092208.15	-0.0705509	0.218934
ENSG00000092295.10	-0.0242798	0.763813
ENSG00000092330.14	-0.0245068	0.159348
ENSG00000092377.12	-1.83331	0.260688
ENSG00000092439.12	-0.0109483	0.370384
ENSG00000092758.14	0.00547906	9.45245e-05
ENSG00000092871.15	-0.0161296	0.420812
ENSG00000092929.10	0.00012744	0.980352
ENSG00000093134.12	-1.6053	0.0556756
ENSG00000094631.17	0.0142224	0.055293
ENSG00000094796.4	-0.208872	0.502575
ENSG00000094804.8	-0.000166232	0.985448
ENSG00000094914.11	0.00882381	0.483738
ENSG00000095059.14	-0.00310277	0.684812
ENSG00000095110.6	-0.0163555	0.244245
ENSG00000095203.13	-0.003234	0.471199
ENSG00000095261.12	-0.0190135	0.203889
ENSG00000095370.18	-0.0131024	0.696676
ENSG00000095383.18	-0.0255283	0.0374079
ENSG00000095397.12	-0.0291236	0.42711
ENSG00000095464.9	-0.00288026	0.995894
ENSG00000095485.15	-0.0601465	0.0546024
ENSG00000095539.14	0.00236307	0.75043
ENSG00000095585.15	-0.0150565	0.595905
ENSG00000095587.8	0.0388424	0.690945
ENSG00000095627.8	0.0406183	0.0747718
ENSG00000095739.10	0.00721333	0.269458
ENSG00000095752.5	-0.158903	0.0631642
ENSG00000095970.15	-0.0258249	0.478565
ENSG00000096092.5	0.00485119	0.754917
ENSG00000096395.9	-1.96583	0.41873
ENSG00000096401.7	-0.00280099	0.78725
ENSG00000096433.9	0.000421174	0.842693
ENSG00000096717.10	-0.00271305	0.91209
ENSG00000097007.16	0.00480471	0.438533
ENSG00000097096.8	-0.023472	0.683312
ENSG00000099204.17	0.000750279	0.768073
ENSG00000099260.9	0.0267584	0.437501
ENSG00000099308.9	-0.00940061	0.621919
ENSG00000099330.7	-0.0504589	0.163565
ENSG00000099337.4	-0.00659634	0.512493
ENSG00000099338.21	-0.119926	0.61799
ENSG00000099341.10	-0.0035933	0.20496
ENSG00000099385.10	0.00226191	0.7899
ENSG00000099399.5	0.00738914	0.303129
ENSG00000099617.3	-0.0808169	0.0286865
ENSG00000099624.6	-0.00417123	0.129431
ENSG00000099800.6	-0.00326116	0.337375
ENSG00000099804.7	-0.000431235	0.931324
ENSG00000099812.7	0.00109229	0.237037
ENSG00000099814.14	0.00390605	0.304688
ENSG00000099821.12	0.00270395	0.56095
ENSG00000099864.16	0.0134605	0.63871
ENSG00000099875.13	-0.000872598	0.737793
ENSG00000099901.15	-0.00125543	0.795722
ENSG00000099904.14	-0.00170383	0.86247
ENSG00000099942.11	-0.00710016	0.447691
ENSG00000099954.17	-0.0573808	0.402396
ENSG00000099957.15	0.188481	0.505769
ENSG00000099960.11	0.0382824	0.0647129
ENSG00000099974.7	0.0066934	0.96341
ENSG00000099985.3	0.000744144	0.967491
ENSG00000099991.15	0.00288992	0.668239
ENSG00000099992.14	-0.0566153	0.152414
ENSG00000099994.10	0.00632066	0.680377
ENSG00000099998.16	-0.000569146	0.954536
ENSG00000100023.16	0.0147606	0.33536
ENSG00000100031.17	0.00565516	0.421356
ENSG00000100034.12	0.000563922	0.971142
ENSG00000100038.18	0.185482	0.681324
ENSG00000100053.8	0.333279	0.495366
ENSG00000100056.10	0.035711	0.354917
ENSG00000100060.16	-0.00842074	0.77061
ENSG00000100065.13	0.00895637	0.052391
ENSG00000100068.10	0.024078	0.514169
ENSG00000100083.17	0.00765426	0.458732
ENSG00000100092.19	-0.00773403	0.371416
ENSG00000100095.17	-0.0322038	0.78098
ENSG00000100097.10	-0.000674813	0.605225
ENSG00000100106.18	-0.0187649	0.407747
ENSG00000100116.15	-0.016054	0.262019
ENSG00000100122.5	-0.389814	0.525786
ENSG00000100139.12	-0.00517192	0.754628
ENSG00000100142.13	1.03352	0.360205
ENSG00000100147.12	-0.196949	0.103844
ENSG00000100156.9	0.27061	0.000196604
ENSG00000100170.8	0.00539509	0.0915937
ENSG00000100197.19	9.98935e-05	0.99935
ENSG00000100206.8	0.010585	0.975983
ENSG00000100207.17	0.00116418	0.852339
ENSG00000100220.10	-0.00262764	0.586431
ENSG00000100226.14	0.0101536	0.265305
ENSG00000100276.9	0.2203	0.540024
ENSG00000100280.15	0.000209723	0.958485
ENSG00000100281.12	-0.02351	0.387469
ENSG00000100292.15	-0.0300375	0.0586696
ENSG00000100297.14	-0.00371867	0.372443
ENSG00000100298.14	-0.862992	0.212325
ENSG00000100335.11	0.00025172	0.986763
ENSG00000100348.8	-0.00570498	0.299139
ENSG00000100350.13	0.0137398	0.00887971
ENSG00000100353.16	-0.000967751	0.612078
ENSG00000100359.19	0.00291227	0.648286
ENSG00000100373.8	-0.0114402	0.804427
ENSG00000100385.12	-0.0438283	0.102999
ENSG00000100399.14	0.0535701	0.614683
ENSG00000100401.18	0.000838352	0.783805
ENSG00000100403.11	0.00097879	0.862024
ENSG00000100425.17	0.0129008	0.473811
ENSG00000100426.6	-0.00663493	0.710838
ENSG00000100427.14	-0.295281	0.599498
ENSG00000100441.8	0.00164827	0.848249
ENSG00000100445.15	0.133482	0.130685
ENSG00000100478.13	-0.0643266	0.444926
ENSG00000100479.11	-0.0456605	0.349217
ENSG00000100490.8	-0.12981	0.573222
ENSG00000100519.10	-0.00221325	0.76829
ENSG00000100522.7	-0.0114196	0.14906
ENSG00000100567.11	-0.00139759	0.802662
ENSG00000100568.9	-0.00737164	0.527397
ENSG00000100592.14	0.0106229	0.510315
ENSG00000100593.16	0.0593608	0.00160309
ENSG00000100596.5	-0.00500445	0.315965
ENSG00000100628.10	0.0162253	0.629668
ENSG00000100652.4	-0.699382	0.469158
ENSG00000100714.14	-0.00138065	0.802818
ENSG00000100726.13	0.000784472	0.910106
ENSG00000100749.6	-0.00335663	0.870334
ENSG00000100802.13	0.0637513	0.275512
ENSG00000100804.17	-0.00329684	0.423944
ENSG00000100842.11	0.00574376	0.925163
ENSG00000100884.8	0.0461465	0.49849
ENSG00000100908.12	-0.0240039	0.363424
ENSG00000100918.11	-0.00366031	0.93364
ENSG00000100926.13	-0.00759423	0.918989
ENSG00000100949.13	-0.00447099	0.755771
ENSG00000100979.13	-0.00237858	0.372809
ENSG00000100987.13	-1.96462	0.640728
ENSG00000100997.17	-0.00222497	0.55149
ENSG00000101049.13	0.00115442	0.924404
ENSG00000101052.11	0.00127127	0.897898
ENSG00000101084.15	0.00152433	0.747822
ENSG00000101096.18	0.014391	0.376428
ENSG00000101104.11	0.0122312	0.00509463
ENSG00000101146.11	0.00314844	0.608407
ENSG00000101161.7	0.00236705	0.0769139
ENSG00000101203.15	0.0976279	0.274162
ENSG00000101220.16	-0.00356034	0.504876
ENSG00000101222.11	-0.170741	0.871908
ENSG00000101236.15	-0.010568	0.527374
ENSG00000101255.9	-0.00294219	0.442569
ENSG00000101294.15	0.000824214	0.459451
ENSG00000101307.14	-0.333114	0.130619
ENSG00000101310.13	0.00299567	0.49365
ENSG00000101311.14	0.000200084	0.860217
ENSG00000101331.14	0.000598029	0.997539
ENSG00000101336.11	-0.00518578	0.730565
ENSG00000101337.14	0.0055812	0.00747392
ENSG00000101342.8	0.0404829	0.00107108
ENSG00000101367.8	0.00397154	0.102708
ENSG00000101391.19	0.0201484	0.0181243
ENSG00000101400.5	0.0272919	0.0995511
ENSG00000101443.16	-0.000718075	0.765507
ENSG00000101445.8	-0.0921294	0.084848
ENSG00000101447.12	0.00897974	0.47352
ENSG00000101448.12	0.349783	0.0212093
ENSG00000101460.11	0.0106595	0.232723
ENSG00000101489.17	0.411075	0.0894926
ENSG00000101680.12	-0.0768888	0.266027
ENSG00000101883.4	1.43582	0.339122
ENSG00000101911.11	-0.00914092	0.153934
ENSG00000101928.11	-0.00321205	0.903959
ENSG00000101945.15	-0.0160319	0.402445
ENSG00000102001.11	0.230614	0.24388
ENSG00000102003.9	0.031949	0.743653
ENSG00000102007.9	-2.73739e-06	0.998601
ENSG00000102024.16	0.00839426	0.237689
ENSG00000102038.14	0.0119732	0.458217
ENSG00000102054.16	0.00322166	0.262611
ENSG00000102057.8	-0.0884094	0.560071
ENSG00000102078.14	0.104806	0.0348094
ENSG00000102096.9	-0.0288117	0.047335
ENSG00000102100.13	0.00320616	0.652571
ENSG00000102119.9	0.00030127	0.957327
ENSG00000102145.12	-1.1089	0.45647
ENSG00000102178.11	0.00312449	0.563236
ENSG00000102225.14	9.78642e-05	0.965985
ENSG00000102226.8	0.00770188	0.0998289
ENSG00000102241.10	0.0114681	0.0128292
ENSG00000102245.6	-0.520357	0.17524
ENSG00000102359.5	-0.0115745	0.146982
ENSG00000102384.12	-0.0107833	0.802899
ENSG00000102710.18	0.00716893	0.239445
ENSG00000102738.7	0.0257637	0.176395
ENSG00000102760.12	-0.0372322	0.287329
ENSG00000102781.12	-0.023794	0.57408
ENSG00000102802.8	0.00280345	0.93508
ENSG00000102805.12	0.0020097	0.953256
ENSG00000102854.13	-0.0049673	0.169897
ENSG00000102858.11	0.00102425	0.763834
ENSG00000102870.5	0.0248025	0.0763246
ENSG00000102891.3	-0.603968	0.597536
ENSG00000102898.10	-0.00270308	0.443631
ENSG00000102901.11	0.0306086	0.0671741
ENSG00000102908.19	-0.000981503	0.80545
ENSG00000102962.4	-0.19078	0.0261159
ENSG00000103024.6	-0.00955503	0.326273
ENSG00000103034.13	0.126858	0.0270512
ENSG00000103037.10	0.0715262	0.0583464
ENSG00000103043.13	0.00556893	0.547089
ENSG00000103047.6	0.0223756	0.561122
ENSG00000103064.12	0.00738061	0.726009
ENSG00000103066.11	0.0103254	0.659311
ENSG00000103067.10	0.0107666	0.11181
ENSG00000103154.8	0.788317	0.446516
ENSG00000103168.15	0.0357101	0.00124986
ENSG00000103196.10	-0.00380888	0.519189
ENSG00000103202.11	-0.00243928	0.639893
ENSG00000103226.16	0.00974577	0.878681
ENSG00000103260.7	-0.0111305	0.334414
ENSG00000103264.14	0.0179841	0.0726483
ENSG00000103269.12	-0.0108129	0.792828
ENSG00000103313.10	-0.336478	0.206156
ENSG00000103319.10	0.0273529	0.031007
ENSG00000103335.18	0.00213001	0.284842
ENSG00000103351.11	0.0139269	0.586077
ENSG00000103355.11	-0.00441906	0.635305
ENSG00000103375.9	0.00811958	0.368532
ENSG00000103426.11	-0.0120965	0.9965
ENSG00000103460.15	0.00815193	0.119081
ENSG00000103485.16	0.00548366	0.0157197
ENSG00000103489.10	0.00186263	0.830011
ENSG00000103495.12	-0.00544183	0.309836
ENSG00000103507.12	0.00504878	0.529755
ENSG00000103510.18	0.0243542	0.0845151
ENSG00000103512.13	0.0293546	0.0315793
ENSG00000103534.15	-0.00345948	0.349885
ENSG00000103540.15	0.020401	0.375122
ENSG00000103544.13	0.0055265	0.646182
ENSG00000103550.12	0.0627034	0.00597038
ENSG00000103653.15	-0.000768834	0.874418
ENSG00000103657.12	-0.00319083	0.72218
ENSG00000103742.10	-0.056225	0.420006
ENSG00000103932.10	0.00498433	0.741056
ENSG00000104142.9	0.0104765	0.48639
ENSG00000104205.11	-0.0697605	0.257484
ENSG00000104213.11	-0.00662376	0.875824
ENSG00000104218.12	-0.0200569	0.439843
ENSG00000104219.11	0.00725774	0.40345
ENSG00000104221.11	-0.119083	0.0290367
ENSG00000104341.15	0.000767954	0.60692
ENSG00000104450.11	-0.0050526	0.551918
ENSG00000104522.14	-0.000978242	0.536709
ENSG00000104524.12	-0.0119166	0.260128
ENSG00000104529.16	0.000594512	0.853806
ENSG00000104635.12	-0.00294064	0.335671
ENSG00000104679.9	0.00672827	0.687243
ENSG00000104728.14	-0.00373702	0.813237
ENSG00000104731.12	0.0139546	0.128099
ENSG00000104805.14	-0.000802767	0.689954
ENSG00000104808.6	0.00386155	0.965396
ENSG00000104823.7	0.000274688	0.910647
ENSG00000104824.15	0.00170209	0.669703
ENSG00000104826.10	-0.0457702	0.962763
ENSG00000104852.13	0.00227215	0.288396
ENSG00000104856.12	-0.0061142	0.634252
ENSG00000104859.13	0.0121363	0.337639
ENSG00000104863.10	0.0144209	0.825672
ENSG00000104870.11	0.000771384	0.379586
ENSG00000104884.13	0.00686391	0.575212
ENSG00000104889.4	-0.00577638	0.455488
ENSG00000104918.6	0.00344739	0.985429
ENSG00000104957.12	0.0203335	0.252442
ENSG00000104964.13	-0.00032851	0.809385
ENSG00000104970.9	-3.39888	0.300244
ENSG00000104972.13	-0.128896	0.116917
ENSG00000104974.9	-0.927085	0.100936
ENSG00000104976.10	-0.0144844	0.561335
ENSG00000104980.6	-0.00492608	0.593401
ENSG00000104983.7	-0.00859562	0.723665
ENSG00000105048.15	5.66265e-05	0.997709
ENSG00000105058.10	-0.00308402	0.687824
ENSG00000105063.17	0.00309182	0.497206
ENSG00000105085.9	-0.0991672	0.287383
ENSG00000105122.11	-0.0780277	0.142902
ENSG00000105131.6	0.0475948	0.428603
ENSG00000105136.18	0.126458	0.146854
ENSG00000105137.11	-0.00439236	0.853228
ENSG00000105146.11	-0.130804	0.729654
ENSG00000105176.16	0.0100901	0.00869094
ENSG00000105197.9	-0.00664096	0.282153
ENSG00000105202.6	-0.00117228	0.470612
ENSG00000105205.6	-0.456953	0.0540179
ENSG00000105219.7	-0.012269	0.622455
ENSG00000105221.15	0.000489949	0.908321
ENSG00000105227.13	0.0240838	0.840053
ENSG00000105270.13	0.00176033	0.923371
ENSG00000105278.9	-0.00844959	0.992347
ENSG00000105289.13	-0.0013375	0.710667
ENSG00000105290.10	0.0253468	0.815782
ENSG00000105298.12	0.0171326	0.339998
ENSG00000105321.11	0.0301531	0.0980133
ENSG00000105323.15	0.00112057	0.632177
ENSG00000105325.12	0.00325229	0.587597
ENSG00000105341.17	-0.00327871	0.71864
ENSG00000105355.7	-0.00184044	0.682645
ENSG00000105366.14	-1.1583	0.0235674
ENSG00000105369.8	-0.0340903	0.275896
ENSG00000105372.5	-0.000353081	0.251152
ENSG00000105373.17	0.000132323	0.907314
ENSG00000105374.8	-0.0858416	0.133574
ENSG00000105379.8	0.000789606	0.839386
ENSG00000105383.13	-0.370598	0.102314
ENSG00000105398.3	-0.115773	0.612219
ENSG00000105402.6	0.00412888	0.553763
ENSG00000105404.9	-0.00141882	0.598075
ENSG00000105409.14	-0.0151502	0.680866
ENSG00000105419.16	-0.0148492	0.688777
ENSG00000105447.11	0.00732194	0.50748
ENSG00000105497.6	-0.0694279	0.41312
ENSG00000105499.12	0.0284376	0.484742
ENSG00000105523.3	0.00684044	0.23415
ENSG00000105552.13	-0.00826614	0.388384
ENSG00000105576.14	0.00400355	0.523905
ENSG00000105583.8	-0.00212832	0.713764
ENSG00000105605.6	-1.6817	0.550382
ENSG00000105607.11	-0.00905272	0.575053
ENSG00000105609.15	-0.179545	0.125442
ENSG00000105639.17	-0.0303615	0.281527
ENSG00000105642.14	-0.396213	0.699237
ENSG00000105643.8	0.000360054	0.986081
ENSG00000105647.13	-0.602893	0.119642
ENSG00000105650.20	-0.019102	0.38497
ENSG00000105655.17	0.00497426	0.608015
ENSG00000105656.11	0.00590332	0.826016
ENSG00000105668.6	0.315932	0.0140464
ENSG00000105672.13	-0.045861	0.753651
ENSG00000105695.13	0.037067	0.979414
ENSG00000105697.6	-0.26691	0.547776
ENSG00000105698.14	-0.00193534	0.684963
ENSG00000105699.15	0.000204412	0.85475
ENSG00000105700.9	-0.00497003	0.625775
ENSG00000105701.14	0.00041098	0.773179
ENSG00000105707.12	0.000928981	0.965588
ENSG00000105711.9	-0.0134137	0.846032
ENSG00000105717.12	0.021452	0.770269
ENSG00000105726.15	0.00238153	0.564464
ENSG00000105737.8	0.0607567	0.565368
ENSG00000105755.6	-0.000844412	0.671692
ENSG00000105767.2	0.0674944	0.0143565
ENSG00000105792.18	-0.13512	0.227274
ENSG00000105808.16	0.532765	0.107146
ENSG00000105829.10	0.00304837	0.889814
ENSG00000105852.9	0.0235711	0.621924
ENSG00000105854.11	-0.00356214	0.524794
ENSG00000105856.12	-0.0198056	0.157849
ENSG00000105880.4	-0.0270498	0.768867
ENSG00000105894.10	0.0227588	0.798504
ENSG00000105939.11	-0.0259773	0.0537204
ENSG00000105953.13	0.00118915	0.688294
ENSG00000105996.6	0.182347	0.000222178
ENSG00000105997.21	0.0445805	0.00132105
ENSG00000106004.4	0.045227	0.0303927
ENSG00000106006.6	0.138394	0.00656208
ENSG00000106066.12	-0.00357827	0.761658
ENSG00000106077.17	-0.00135245	0.719615
ENSG00000106123.10	0.0358189	0.300222
ENSG00000106153.12	-0.00085101	0.54095
ENSG00000106258.12	-0.00307932	0.585679
ENSG00000106261.15	0.00408048	0.105615
ENSG00000106330.10	-0.00524824	0.811647
ENSG00000106333.11	-0.000116783	0.982033
ENSG00000106336.11	-0.915606	0.358291
ENSG00000106351.11	0.0124727	0.180318
ENSG00000106384.9	0.0197998	0.00411754
ENSG00000106392.9	-0.0051066	0.616697
ENSG00000106479.9	0.0145014	0.669687
ENSG00000106484.13	0.010373	0.105244
ENSG00000106511.5	-0.00825408	0.945809
ENSG00000106537.7	-0.0044746	0.158204
ENSG00000106609.15	0.00277445	0.518941
ENSG00000106615.8	-0.000701074	0.912909
ENSG00000106628.9	-0.000735652	0.75613
ENSG00000106633.14	-0.320011	0.676251
ENSG00000106682.13	0.00291654	0.348033
ENSG00000106701.10	0.00883669	0.670933
ENSG00000106771.11	-0.0171517	0.0642797
ENSG00000106785.13	-0.0146562	0.119516
ENSG00000106789.11	-0.00770077	0.337012
ENSG00000106809.9	-0.0163137	0.708173
ENSG00000106823.11	-0.0607275	0.297519
ENSG00000106868.15	-0.00861333	0.710065
ENSG00000106927.10	0.0474881	0.074223
ENSG00000106948.15	-0.0197406	0.125321
ENSG00000106992.16	0.0379068	0.126874
ENSG00000107020.8	-0.00846578	0.613737
ENSG00000107021.14	0.0102142	0.614058
ENSG00000107159.11	-0.000632578	0.796751
ENSG00000107281.8	-0.000601272	0.767312
ENSG00000107317.10	0.00432954	0.702016
ENSG00000107331.15	-0.000789959	0.848793
ENSG00000107404.16	-0.00186706	0.646196
ENSG00000107438.7	-0.00221918	0.298894
ENSG00000107521.17	-0.00227882	0.763997
ENSG00000107537.12	0.00478591	0.638827
ENSG00000107566.12	-0.0134471	0.0899757
ENSG00000107593.16	-1.47489	0.179346
ENSG00000107611.13	-0.509121	0.277645
ENSG00000107614.20	-0.183164	0.0868088
ENSG00000107625.11	0.00207179	0.916504
ENSG00000107672.13	-0.00164875	0.888268
ENSG00000107738.18	-0.00829242	0.441137
ENSG00000107742.11	-0.0279886	0.13494
ENSG00000107829.12	0.00783921	0.436056
ENSG00000107874.9	-0.000474519	0.974253
ENSG00000107902.12	0.000612641	0.973457
ENSG00000107951.11	-0.0285901	0.218311
ENSG00000107960.9	-0.0158839	0.587331
ENSG00000108187.14	-0.00123278	0.926029
ENSG00000108219.13	0.00344016	0.557032
ENSG00000108262.14	-0.000796322	0.863074
ENSG00000108309.11	0.188348	0.0449858
ENSG00000108344.13	0.00128692	0.0461636
ENSG00000108349.13	-0.00109882	0.837958
ENSG00000108352.10	-0.00288983	0.544936
ENSG00000108375.11	0.00168145	0.000753757
ENSG00000108387.13	0.00229501	0.971702
ENSG00000108389.8	-0.0223189	0.154852
ENSG00000108405.3	0.0382909	0.701159
ENSG00000108417.3	0.623717	0.235831
ENSG00000108448.19	-0.0578503	0.4842
ENSG00000108468.13	0.0121923	0.238713
ENSG00000108506.10	-0.0159272	0.564723
ENSG00000108511.9	0.0056474	0.294119
ENSG00000108557.16	0.00860273	0.432028
ENSG00000108578.13	-0.00224192	0.878855
ENSG00000108582.10	0.000679813	0.835063
ENSG00000108587.13	0.00984412	0.588479
ENSG00000108588.12	-0.00484886	0.301077
ENSG00000108592.15	0.0106185	0.206513
ENSG00000108599.13	0.0302971	0.309891
ENSG00000108604.14	0.00302184	0.44466
ENSG00000108622.9	0.0292643	0.360442
ENSG00000108639.6	-0.000307885	0.746827
ENSG00000108651.8	0.00443475	0.699424
ENSG00000108654.10	0.00152915	0.44419
ENSG00000108669.15	0.00583153	0.669305
ENSG00000108671.8	0.000933756	0.88142
ENSG00000108684.13	0.02506	0.890875
ENSG00000108784.8	-0.00680234	0.542638
ENSG00000108785.7	-0.0734346	0.91017
ENSG00000108786.9	0.00162341	0.993882
ENSG00000108788.10	-0.0139302	0.133915
ENSG00000108799.11	0.028592	0.245498
ENSG00000108819.10	0.00785328	0.367305
ENSG00000108821.12	-1.77902e-05	0.721948
ENSG00000108829.9	-0.00220474	0.335076
ENSG00000108840.14	0.00784231	0.293122
ENSG00000108846.14	0.002404	0.291467
ENSG00000108861.7	0.00756083	0.392484
ENSG00000108946.13	-0.00172467	0.651917
ENSG00000108947.4	-0.0360402	0.811505
ENSG00000108963.16	0.0108939	0.608481
ENSG00000108984.12	-0.0288193	0.147485
ENSG00000109047.7	-0.766715	0.718987
ENSG00000109063.13	0.254087	0.0257967
ENSG00000109089.7	-0.0233828	0.238338
ENSG00000109099.12	-0.00163711	0.812221
ENSG00000109101.6	-0.541971	0.324098
ENSG00000109107.12	-0.00103249	0.888587
ENSG00000109118.12	0.0179848	0.331295
ENSG00000109181.10	-0.687313	0.354075
ENSG00000109184.13	-0.0672406	0.0120606
ENSG00000109255.10	-0.044146	0.232874
ENSG00000109270.11	-0.0183203	0.264661
ENSG00000109272.3	-1.1687	0.433404
ENSG00000109458.7	-0.0286865	0.230825
ENSG00000109654.13	-0.00103328	0.620131
ENSG00000109686.15	-0.00448004	0.281856
ENSG00000109705.7	0.0823043	0.583855
ENSG00000109743.9	-0.0558989	0.369826
ENSG00000109758.7	0.172277	0.532836
ENSG00000109790.15	-0.00464369	0.810532
ENSG00000109854.12	0.00974898	0.121935
ENSG00000109881.15	0.0266139	0.109385
ENSG00000109906.12	-0.199335	0.434686
ENSG00000109917.9	0.0016932	0.879636
ENSG00000109919.8	0.00236685	0.619871
ENSG00000109920.11	0.0288627	0.00157428
ENSG00000109943.7	-1.3328	0.0239672
ENSG00000109944.9	0.0493382	0.663859
ENSG00000109971.12	-0.000464896	0.182042
ENSG00000110011.12	0.0113152	0.534302
ENSG00000110047.16	-0.000605916	0.917303
ENSG00000110075.13	0.00232854	0.776977
ENSG00000110076.17	0.0175995	0.593646
ENSG00000110090.11	0.000253619	0.950805
ENSG00000110169.9	0.486522	0.00808483
ENSG00000110171.17	0.0415618	0.0115184
ENSG00000110200.7	0.00701393	0.813516
ENSG00000110237.3	0.00930139	0.250701
ENSG00000110244.6	-0.19872	0.775558
ENSG00000110245.10	0.726212	0.113933
ENSG00000110330.7	-0.013831	0.281727
ENSG00000110344.8	-0.0108455	0.479682
ENSG00000110455.12	0.106569	0.00134617
ENSG00000110492.14	2.90166e-05	0.982473
ENSG00000110497.13	0.0369187	0.0140345
ENSG00000110619.15	0.0216677	0.0112335
ENSG00000110651.10	5.21822e-05	0.960763
ENSG00000110719.8	-0.00267303	0.504148
ENSG00000110723.10	-0.00858654	0.638312
ENSG00000110786.16	0.176866	0.626336
ENSG00000110799.12	0.000392263	0.843641
ENSG00000110811.18	0.00024819	0.983846
ENSG00000110841.12	-0.0104127	0.38954
ENSG00000110881.10	0.0113392	0.559326
ENSG00000110917.6	-0.000539184	0.568451
ENSG00000110925.5	0.00189989	0.939305
ENSG00000110934.9	-0.185448	0.0146406
ENSG00000110955.7	-0.000430468	0.423
ENSG00000111077.16	0.0066024	0.464692
ENSG00000111087.8	0.0118144	0.844684
ENSG00000111181.11	0.0595725	0.688826
ENSG00000111196.8	-0.0221087	0.436177
ENSG00000111229.14	-0.00148476	0.553235
ENSG00000111266.7	0.000443273	0.931902
ENSG00000111269.2	-0.0144455	0.319551
ENSG00000111276.9	0.000517975	0.923806
ENSG00000111300.8	-0.0152519	0.367432
ENSG00000111319.11	0.00160034	0.43674
ENSG00000111321.9	-0.0024219	0.558277
ENSG00000111331.11	-0.000493696	0.851198
ENSG00000111335.11	-0.000905812	0.834123
ENSG00000111348.7	-0.0150318	0.00980349
ENSG00000111405.7	-0.439112	0.708133
ENSG00000111424.9	0.00280637	0.533181
ENSG00000111445.12	-0.0158067	0.47122
ENSG00000111490.11	-0.017856	0.56506
ENSG00000111602.10	0.00404764	0.690934
ENSG00000111615.11	0.000385485	0.977974
ENSG00000111641.9	0.00434399	0.606882
ENSG00000111642.13	0.00383938	0.194674
ENSG00000111644.6	-0.325728	0.052743
ENSG00000111652.8	-0.0190583	0.0777217
ENSG00000111664.9	0.174672	0.511185
ENSG00000111669.13	-0.000718634	0.284471
ENSG00000111670.13	-0.0208169	0.0446294
ENSG00000111676.13	-0.00110228	0.751562
ENSG00000111679.15	0.000582034	0.957475
ENSG00000111684.9	-0.0218499	0.402027
ENSG00000111716.11	-0.000460099	0.637323
ENSG00000111801.14	-0.0148257	0.409549
ENSG00000111837.10	-0.100303	0.516025
ENSG00000111846.14	0.0278929	0.700991
ENSG00000111850.9	-0.0303239	0.658594
ENSG00000111860.12	-0.107843	0.375654
ENSG00000111911.6	-0.00313481	0.839351
ENSG00000111981.4	-0.222659	0.471719
ENSG00000112031.14	0.039324	0.511639
ENSG00000112039.3	-0.0278801	0.525763
ENSG00000112159.10	-9.54707e-05	0.984094
ENSG00000112195.8	0.123434	0.00976002
ENSG00000112200.15	-0.0114068	0.41647
ENSG00000112208.11	-0.0265183	0.232722
ENSG00000112212.10	-0.437977	0.426027
ENSG00000112242.13	0.0322465	0.0223174
ENSG00000112299.7	-0.0327498	0.244937
ENSG00000112303.12	-0.115528	0.273034
ENSG00000112308.11	0.00144931	0.730346
ENSG00000112319.16	-0.0925062	0.783175
ENSG00000112343.10	-0.0101211	0.546123
ENSG00000112357.11	-0.00329947	0.928995
ENSG00000112486.13	-0.0677641	0.924498
ENSG00000112494.8	0.0236439	0.449535
ENSG00000112499.11	0.158289	0.395733
ENSG00000112511.16	0.0376643	0.0376109
ENSG00000112584.12	0.030623	0.241332
ENSG00000112640.13	-0.0056231	0.630802
ENSG00000112655.14	0.00398111	0.0510285
ENSG00000112658.7	0.00331919	0.441106
ENSG00000112667.11	-0.00167181	0.669613
ENSG00000112701.16	0.00216818	0.778662
ENSG00000112759.15	0.00119319	0.624793
ENSG00000112763.14	0.0435701	0.00143169
ENSG00000112852.6	0.056993	0.422603
ENSG00000112874.8	-0.00205089	0.906262
ENSG00000112893.8	-0.00876048	0.231323
ENSG00000112941.11	0.0394382	0.0275782
ENSG00000112964.12	-0.0135468	0.827493
ENSG00000113070.7	0.00379823	0.308239
ENSG00000113088.5	-0.138759	0.383806
ENSG00000113194.11	-0.00534265	0.71324
ENSG00000113196.2	0.0636547	0.295521
ENSG00000113205.4	-0.0515593	0.743634
ENSG00000113209.8	-0.116846	0.792378
ENSG00000113211.5	-0.187312	0.847253
ENSG00000113212.6	0.081661	0.391696
ENSG00000113262.13	0.35111	0.807527
ENSG00000113269.12	-0.00593343	0.581247
ENSG00000113272.12	-0.0126436	0.560709
ENSG00000113273.14	-0.0104677	0.709374
ENSG00000113300.10	-0.00331692	0.811526
ENSG00000113312.9	-0.00861872	0.493518
ENSG00000113387.10	0.00113352	0.651682
ENSG00000113460.11	0.00386444	0.53949
ENSG00000113552.14	-0.000884933	0.906863
ENSG00000113569.14	-0.00290162	0.732643
ENSG00000113594.8	-0.0551018	0.484993
ENSG00000113600.9	0.84415	0.576309
ENSG00000113621.13	-0.0290725	0.147574
ENSG00000113638.11	-0.00913412	0.811443
ENSG00000113643.7	-0.00151442	0.868412
ENSG00000113658.15	-0.00149707	0.825499
ENSG00000113716.11	0.00923665	0.451604
ENSG00000113719.14	-0.00192835	0.452704
ENSG00000113722.15	-0.000602942	0.73628
ENSG00000113732.7	-0.0053434	0.220876
ENSG00000113758.12	0.00456496	0.204765
ENSG00000113811.9	-0.00490382	0.685618
ENSG00000113812.12	-0.0319783	0.429103
ENSG00000113851.12	-0.0157764	0.371658
ENSG00000113889.10	0.204856	0.0771657
ENSG00000113905.4	0.143586	0.722135
ENSG00000113966.8	-0.298098	0.124711
ENSG00000114019.13	0.0169432	0.137517
ENSG00000114021.10	-0.00418937	0.699999
ENSG00000114026.20	-0.0147389	0.587663
ENSG00000114030.11	-0.0205911	0.277893
ENSG00000114126.16	0.00508097	0.674705
ENSG00000114127.9	-0.014074	0.239778
ENSG00000114251.12	-0.0278943	0.104514
ENSG00000114268.10	-0.0169079	0.453447
ENSG00000114270.14	-0.00274707	0.561637
ENSG00000114315.3	0.00963783	0.00513964
ENSG00000114331.11	-0.00771003	0.430185
ENSG00000114353.15	0.000870675	0.640909
ENSG00000114374.11	0.00892124	0.683339
ENSG00000114378.15	-0.0260464	0.155905
ENSG00000114383.8	-0.0109881	0.486946
ENSG00000114391.11	-0.000238304	0.73452
ENSG00000114491.12	-0.00435651	0.791809
ENSG00000114520.9	0.000220121	0.989774
ENSG00000114529.11	0.00866571	0.666741
ENSG00000114544.14	0.00804882	0.397916
ENSG00000114626.16	0.0015606	0.875595
ENSG00000114646.8	0.0855368	0.518601
ENSG00000114654.7	0.0583158	0.269655
ENSG00000114686.7	-0.000321361	0.948973
ENSG00000114744.7	-0.0244399	0.256037
ENSG00000114770.15	0.0255234	0.0235888
ENSG00000114771.12	0.0982944	0.115032
ENSG00000114854.6	-0.0712791	0.38862
ENSG00000114867.18	0.0022216	0.179252
ENSG00000114904.11	-0.0171826	0.578715
ENSG00000114956.18	0.00527256	0.639178
ENSG00000114993.14	0.0292153	6.40025e-05
ENSG00000115008.5	-0.202538	0.0869589
ENSG00000115009.10	-0.00247244	0.456047
ENSG00000115041.11	0.243867	0.0595314
ENSG00000115053.14	0.00101907	0.0790944
ENSG00000115204.13	-0.00951682	0.531209
ENSG00000115226.8	-0.0320091	0.708595
ENSG00000115266.10	0.00384531	0.957836
ENSG00000115268.8	-0.000973226	0.12801
ENSG00000115275.10	0.00876771	0.286493
ENSG00000115286.18	-0.00176785	0.708129
ENSG00000115289.11	0.0142804	0.725412
ENSG00000115318.10	-0.0212358	0.740896
ENSG00000115364.12	2.43623e-05	0.998239
ENSG00000115504.13	0.0138529	0.426138
ENSG00000115507.8	0.0969049	0.11884
ENSG00000115520.7	-0.0156813	0.498807
ENSG00000115524.14	0.00162425	0.574527
ENSG00000115590.12	-0.0358864	0.121865
ENSG00000115594.10	-0.00896628	0.37819
ENSG00000115596.3	0.046264	0.553038
ENSG00000115598.8	0.217815	0.0120509
ENSG00000115607.8	-0.385368	0.218945
ENSG00000115648.12	-0.00241772	0.523629
ENSG00000115649.14	0.00376375	0.540264
ENSG00000115657.11	0.0910371	0.00732087
ENSG00000115750.15	0.00441436	0.917361
ENSG00000115760.12	-0.00120277	0.71359
ENSG00000115808.10	-0.00821786	0.427045
ENSG00000115841.18	-0.0547275	0.454413
ENSG00000115850.8	-0.802407	0.40692
ENSG00000115902.9	-0.00359384	0.634129
ENSG00000115904.11	-0.00244411	0.784952
ENSG00000115935.15	-0.0177695	0.167049
ENSG00000115998.6	-0.0440611	0.6777
ENSG00000116001.14	0.00280885	0.611676
ENSG00000116014.8	-0.509465	0.444569
ENSG00000116017.9	0.00346553	0.455984
ENSG00000116030.15	0.00423782	0.421147
ENSG00000116031.8	-0.302204	0.446975
ENSG00000116032.5	-0.032449	0.940756
ENSG00000116035.2	0.0648184	0.931555
ENSG00000116039.10	0.0891589	0.46443
ENSG00000116095.9	-0.0288661	0.305367
ENSG00000116161.16	-0.0027933	0.633989
ENSG00000116176.6	-0.0292373	0.353729
ENSG00000116199.10	-0.0166065	0.263869
ENSG00000116251.8	0.00107085	0.576368
ENSG00000116254.16	0.173425	0.145062
ENSG00000116266.9	0.00720577	0.574343
ENSG00000116396.12	-0.00309394	0.856159
ENSG00000116478.10	0.00156799	0.565344
ENSG00000116489.11	-0.00710565	0.0455525
ENSG00000116525.12	0.0898239	0.265388
ENSG00000116544.10	0.27979	0.466404
ENSG00000116584.16	0.00872633	0.183868
ENSG00000116604.16	0.004845	0.576272
ENSG00000116649.8	-0.00588983	0.176898
ENSG00000116675.14	0.108119	0.0178675
ENSG00000116678.17	-0.0114315	0.814634
ENSG00000116685.14	-0.000271997	0.947271
ENSG00000116688.15	-0.0049367	0.389378
ENSG00000116691.9	-0.0182271	0.287099
ENSG00000116729.12	0.00407843	0.603624
ENSG00000116741.7	-0.00709175	0.505701
ENSG00000116748.18	-0.147611	0.75523
ENSG00000116752.5	-0.0133039	0.471778
ENSG00000116761.10	-0.0737363	0.164061
ENSG00000116771.5	-0.0110449	0.291033
ENSG00000116786.10	-0.00256663	0.793327
ENSG00000116815.14	-0.053773	0.147132
ENSG00000116857.15	0.00176357	0.607963
ENSG00000116885.17	-0.12122	0.342645
ENSG00000116898.10	-0.00626507	0.426889
ENSG00000116957.11	-0.0367803	0.116205
ENSG00000116962.13	0.000287075	0.926402
ENSG00000117000.8	-0.037227	0.198656
ENSG00000117016.8	-0.0347089	0.323959
ENSG00000117069.13	-0.0818694	0.330069
ENSG00000117118.8	-0.0133901	0.0270014
ENSG00000117122.12	-0.00116682	0.915085
ENSG00000117148.7	0.00292608	0.720368
ENSG00000117153.14	0.00394039	0.78062
ENSG00000117154.10	-0.232219	0.42901
ENSG00000117155.15	-0.0114298	0.47746
ENSG00000117222.12	-0.0257366	0.378787
ENSG00000117245.11	-0.239932	0.550648
ENSG00000117305.13	-0.0095607	0.357369
ENSG00000117308.13	-0.00172041	0.64693
ENSG00000117318.8	-0.00366869	0.346753
ENSG00000117322.15	0.00152604	0.929111
ENSG00000117360.11	0.00956082	0.430884
ENSG00000117407.15	0.0222449	0.887944
ENSG00000117410.12	-0.00484943	0.1136
ENSG00000117411.15	-0.00610751	0.479714
ENSG00000117425.12	0.131847	0.239211
ENSG00000117481.9	-0.0356081	0.297711
ENSG00000117533.13	-0.0678272	0.0922929
ENSG00000117586.9	-0.0288394	0.529967
ENSG00000117594.8	-0.178741	0.138199
ENSG00000117595.9	0.00370205	0.520947
ENSG00000117682.15	-0.0386999	0.0423581
ENSG00000117713.16	-0.000379356	0.924739
ENSG00000117751.16	-0.0314443	0.0535498
ENSG00000117758.12	-0.0290475	0.0360387
ENSG00000117791.14	-0.0423252	0.337432
ENSG00000117859.17	-0.00181028	0.891303
ENSG00000117899.9	0.00336874	0.716938
ENSG00000117971.10	0.144575	0.668199
ENSG00000118094.10	0.128367	0.0877992
ENSG00000118113.10	-0.118632	0.598117
ENSG00000118156.11	0.165152	0.000332193
ENSG00000118160.12	0.191597	0.0779564
ENSG00000118200.13	-0.00235023	0.884597
ENSG00000118242.14	-0.07374	0.0832996
ENSG00000118292.7	-0.258331	0.0607946
ENSG00000118402.5	-0.303565	0.454784
ENSG00000118412.11	-0.010593	0.582986
ENSG00000118473.20	-0.0771028	0.35439
ENSG00000118496.4	-0.00181032	0.940641
ENSG00000118620.11	-0.0254975	0.578981
ENSG00000118762.6	-0.00544114	0.737867
ENSG00000118816.8	-0.00810818	0.00369177
ENSG00000118873.14	-0.00541309	0.692197
ENSG00000118961.13	-0.0142578	0.58747
ENSG00000119041.9	-0.00152556	0.916594
ENSG00000119231.9	-0.0242675	0.272166
ENSG00000119326.13	-0.0121712	0.412568
ENSG00000119333.10	-0.00428583	0.255397
ENSG00000119335.15	0.00213994	0.250164
ENSG00000119392.13	0.0089944	0.450531
ENSG00000119403.12	-0.00731061	0.4434
ENSG00000119414.10	-0.0199806	0.0680468
ENSG00000119431.8	-0.00306657	0.569108
ENSG00000119535.16	-0.0271008	0.339456
ENSG00000119547.5	-0.00412034	0.850452
ENSG00000119559.14	-0.0188017	0.222173
ENSG00000119574.11	-0.00606159	0.74694
ENSG00000119640.7	-0.0488176	0.465988
ENSG00000119673.13	0.00189431	0.945212
ENSG00000119681.10	-0.00165924	0.743934
ENSG00000119684.14	0.0084266	0.681179
ENSG00000119689.13	-0.0051164	0.287116
ENSG00000119718.9	-0.00187577	0.916288
ENSG00000119737.5	0.17992	0.55976
ENSG00000119777.17	0.00183086	0.674412
ENSG00000119820.9	0.00274907	0.701393
ENSG00000119919.10	0.0836594	0.175594
ENSG00000119922.8	-0.00590906	0.781042
ENSG00000119943.9	-0.0108911	0.823718
ENSG00000119977.19	-0.0186243	0.183946
ENSG00000120029.11	-0.0270556	0.358397
ENSG00000120049.17	0.125677	0.141334
ENSG00000120068.6	0.0053098	0.185887
ENSG00000120075.5	0.0106661	0.285607
ENSG00000120093.10	0.0111485	0.00889625
ENSG00000120129.5	-4.74085e-05	0.975387
ENSG00000120156.19	-0.0208752	0.623705
ENSG00000120160.9	-2.83849	0.404096
ENSG00000120306.8	-0.00188201	0.588819
ENSG00000120318.14	0.0406024	0.0044308
ENSG00000120322.3	0.040956	0.48425
ENSG00000120324.6	0.0754322	0.445998
ENSG00000120327.6	-0.00847227	0.811331
ENSG00000120328.6	0.0918245	0.451501
ENSG00000120437.8	0.00382447	0.549349
ENSG00000120440.12	0.506661	0.0499254
ENSG00000120451.9	0.0036266	0.716879
ENSG00000120669.14	-0.0567379	0.728885
ENSG00000120686.10	0.00235442	0.63342
ENSG00000120693.12	-0.00718388	0.698179
ENSG00000120696.8	0.0126889	0.683088
ENSG00000120697.7	-0.00445892	0.524053
ENSG00000120709.9	-0.00508785	0.797957
ENSG00000120727.11	-0.0108772	0.440688
ENSG00000120733.12	0.00673433	0.342661
ENSG00000120738.7	0.0012957	0.0790126
ENSG00000120784.14	-0.0145588	0.703877
ENSG00000120875.7	-0.00344205	0.371279
ENSG00000120910.13	-0.0305411	0.529227
ENSG00000120913.22	0.00782704	0.677011
ENSG00000120948.14	0.0106188	0.172362
ENSG00000120963.10	-0.00491148	0.422676
ENSG00000121089.4	-0.140257	0.229835
ENSG00000121152.8	0.00285097	0.873562
ENSG00000121210.14	-0.0441524	0.264013
ENSG00000121211.6	-0.0550046	0.357693
ENSG00000121236.18	0.132112	0.58779
ENSG00000121318.2	0.157249	0.878171
ENSG00000121335.11	-1.48426	0.521261
ENSG00000121361.3	-0.0914368	0.284924
ENSG00000121406.7	-0.0820761	0.376049
ENSG00000121413.11	0.00698171	0.81904
ENSG00000121417.12	0.0411288	0.616672
ENSG00000121542.10	-0.0925341	0.156627
ENSG00000121552.3	-0.124707	0.257869
ENSG00000121570.11	-0.16705	0.781871
ENSG00000121653.10	0.131292	5.24643e-06
ENSG00000121671.10	0.0526771	0.000257383
ENSG00000121680.14	0.0115371	0.0571599
ENSG00000121690.8	0.0438285	0.00936803
ENSG00000121691.4	0.00507209	0.282148
ENSG00000121716.17	0.0418806	0.0892854
ENSG00000121775.16	-0.0289487	0.412063
ENSG00000121807.5	-0.269955	0.0932252
ENSG00000121864.8	-0.0287885	0.251742
ENSG00000121903.13	-0.0120496	0.929427
ENSG00000121904.16	-0.0654493	0.449189
ENSG00000121940.14	-0.00746454	0.834694
ENSG00000122012.12	0.127967	0.0986563
ENSG00000122068.11	-0.00919772	0.381897
ENSG00000122085.15	0.0290419	0.481667
ENSG00000122133.15	-0.229184	0.488204
ENSG00000122176.10	-0.00215385	0.521067
ENSG00000122194.17	0.863807	0.351265
ENSG00000122367.18	0.0250856	0.563767
ENSG00000122375.10	-1.98107	0.575394
ENSG00000122386.9	0.00144544	0.947235
ENSG00000122406.11	-0.000268932	0.532369
ENSG00000122417.14	-0.012538	0.581054
ENSG00000122477.11	0.21884	0.654033
ENSG00000122490.17	-0.00654915	0.435083
ENSG00000122547.9	0.0138167	0.163383
ENSG00000122642.9	0.00203303	0.600717
ENSG00000122694.14	-0.0334169	0.109923
ENSG00000122728.6	-1.88245	0.515053
ENSG00000122756.13	0.0226401	0.540478
ENSG00000122877.12	0.0178	0.338853
ENSG00000122884.11	0.00146643	0.757023
ENSG00000122912.13	-0.0516394	0.134199
ENSG00000122958.13	-0.00536759	0.443496
ENSG00000122971.7	-0.00260793	0.665547
ENSG00000122986.12	-0.149388	0.260539
ENSG00000123144.9	-0.00662902	0.11226
ENSG00000123159.14	0.000126781	0.940348
ENSG00000123178.13	0.015901	0.36066
ENSG00000123201.13	0.410156	0.000888846
ENSG00000123268.7	-0.00326244	0.893479
ENSG00000123297.15	-0.00887882	0.570551
ENSG00000123338.11	-0.0296484	0.153057
ENSG00000123342.14	-0.0203958	0.484978
ENSG00000123349.12	-0.00176936	0.406746
ENSG00000123352.16	-0.0252769	0.341534
ENSG00000123358.18	0.00298889	0.00273971
ENSG00000123360.10	-0.00596018	0.935475
ENSG00000123384.12	0.000155861	0.833012
ENSG00000123388.4	-0.0310493	0.676645
ENSG00000123395.13	0.0085103	0.369231
ENSG00000123407.3	0.45492	0.0209875
ENSG00000123411.13	-0.0110642	0.858585
ENSG00000123416.14	-0.00183292	0.221652
ENSG00000123453.15	0.154368	0.218967
ENSG00000123595.6	-0.0014754	0.948313
ENSG00000123609.9	-0.00173393	0.89299
ENSG00000123689.5	0.000291893	0.980567
ENSG00000123739.9	-0.0420932	0.0199479
ENSG00000123838.9	-0.0227811	0.276674
ENSG00000123843.11	-0.0170105	0.398966
ENSG00000123870.10	0.0506439	0.75502
ENSG00000123933.13	0.00216827	0.746874
ENSG00000123975.4	-0.014317	0.0718944
ENSG00000123999.4	0.0666058	0.885312
ENSG00000124006.13	0.0138289	0.00723817
ENSG00000124067.15	0.0150531	0.197502
ENSG00000124092.11	-0.183169	0.829655
ENSG00000124097.7	0.394517	0.343353
ENSG00000124103.8	2.65883	0.260703
ENSG00000124134.7	-0.0238705	0.968476
ENSG00000124143.9	0.380886	0.13314
ENSG00000124155.15	-7.16515e-05	0.965178
ENSG00000124157.6	-4.81319	0.156832
ENSG00000124193.13	0.00293913	0.343605
ENSG00000124222.20	0.0118668	0.0023668
ENSG00000124226.9	0.00317531	0.314783
ENSG00000124256.13	0.047319	0.210949
ENSG00000124257.6	-0.161688	0.582741
ENSG00000124313.11	-0.00124452	0.957982
ENSG00000124333.13	0.00219594	0.851858
ENSG00000124356.14	0.0234999	0.0797657
ENSG00000124391.4	-0.712519	0.212349
ENSG00000124440.14	0.0742519	0.0450295
ENSG00000124466.8	-0.130428	0.153363
ENSG00000124486.11	0.000382499	0.847546
ENSG00000124496.11	-0.0151684	0.600329
ENSG00000124508.15	0.0145555	0.683583
ENSG00000124541.6	-0.0123242	0.513092
ENSG00000124549.13	0.100233	0.316407
ENSG00000124568.9	2.71852	0.0760452
ENSG00000124587.12	-0.00338117	0.685487
ENSG00000124588.18	-0.000238549	0.984017
ENSG00000124593.13	0.120375	0.0660084
ENSG00000124608.4	0.00745146	0.286819
ENSG00000124657.1	1.00154	0.573873
ENSG00000124701.5	-0.168927	0.825107
ENSG00000124762.12	-0.000699365	0.673828
ENSG00000124766.5	0.00381583	0.0535755
ENSG00000124795.13	0.00228054	0.338236
ENSG00000124802.10	0.0532131	0.148485
ENSG00000124831.17	0.00124089	0.775515
ENSG00000124875.8	-0.119169	0.217476
ENSG00000124920.12	-0.00310417	0.586515
ENSG00000124942.12	-0.000565653	0.397008
ENSG00000125046.13	0.0264972	0.388908
ENSG00000125084.10	0.243267	0.856421
ENSG00000125089.15	0.0155168	0.462937
ENSG00000125148.6	-0.00622262	0.185066
ENSG00000125149.10	-0.0333088	0.43902
ENSG00000125249.6	0.00444836	0.431536
ENSG00000125257.12	0.00179838	0.88396
ENSG00000125266.6	0.00349816	0.199901
ENSG00000125319.13	0.0306974	0.649626
ENSG00000125347.12	-0.00237966	0.429251
ENSG00000125351.9	0.0371411	0.0289744
ENSG00000125378.14	0.0046088	0.139911
ENSG00000125414.17	-6.52397	0.374018
ENSG00000125434.9	-0.0143535	0.846945
ENSG00000125449.5	0.00780831	0.768076
ENSG00000125498.18	0.706253	0.507776
ENSG00000125503.11	0.00590882	0.399262
ENSG00000125520.12	0.00281714	0.521793
ENSG00000125611.14	-0.00164311	0.877226
ENSG00000125630.14	0.00335896	0.83047
ENSG00000125637.14	0.00474133	0.577375
ENSG00000125648.13	-0.00196788	0.784323
ENSG00000125650.4	-0.139895	0.356796
ENSG00000125691.11	0.000283614	0.547727
ENSG00000125730.15	3.11201e-06	0.996057
ENSG00000125735.9	-0.0733179	0.603106
ENSG00000125741.4	-0.00343622	0.89519
ENSG00000125744.10	0.0536399	0.0534203
ENSG00000125746.13	-0.0014573	0.811868
ENSG00000125753.12	-0.00141825	0.63181
ENSG00000125787.10	0.0957211	0.936371
ENSG00000125798.13	0.00771185	0.219086
ENSG00000125810.9	-0.0060552	0.441507
ENSG00000125820.5	0.165936	0.420418
ENSG00000125821.10	0.00665429	0.42897
ENSG00000125826.18	0.000352562	0.868518
ENSG00000125835.16	-0.000558564	0.649945
ENSG00000125841.11	-0.00289767	0.897035
ENSG00000125843.9	-0.00974444	0.745144
ENSG00000125900.11	-1.68112	0.609935
ENSG00000125901.5	-0.00233019	0.649192
ENSG00000125910.5	-0.211411	0.114322
ENSG00000125912.9	-0.000826154	0.701815
ENSG00000125952.17	-0.0242629	0.0655147
ENSG00000125966.9	0.0789478	0.178531
ENSG00000125971.15	0.000786344	0.741898
ENSG00000125998.7	0.0610403	0.714601
ENSG00000126005.14	0.00057034	0.907896
ENSG00000126012.10	0.00514195	0.0353632
ENSG00000126062.3	0.00850159	0.515743
ENSG00000126091.18	-0.00855879	0.920643
ENSG00000126217.19	0.0121187	0.00287781
ENSG00000126218.10	0.0300669	0.0653349
ENSG00000126231.12	0.00801151	0.979625
ENSG00000126243.7	-0.0159057	0.449021
ENSG00000126246.8	-0.323858	0.298745
ENSG00000126254.10	0.00401492	0.444812
ENSG00000126267.7	-0.00132762	0.499364
ENSG00000126337.12	0.384218	0.279214
ENSG00000126391.12	0.00200669	0.873351
ENSG00000126458.3	0.00193949	0.742474
ENSG00000126467.9	0.0915347	0.898862
ENSG00000126562.15	0.00437134	0.479263
ENSG00000126583.9	-0.00409788	0.932933
ENSG00000126602.9	-0.00154948	0.674194
ENSG00000126653.14	0.0138742	0.405353
ENSG00000126698.9	-0.00640798	0.430629
ENSG00000126705.12	0.00431145	0.821782
ENSG00000126709.13	-0.00054805	0.726821
ENSG00000126746.16	-0.000246325	0.992541
ENSG00000126759.11	-0.145945	0.37375
ENSG00000126767.16	-0.00631322	0.591808
ENSG00000126775.8	-0.0381804	0.284757
ENSG00000126787.11	-0.0080807	0.599123
ENSG00000126860.10	-0.228045	0.0277082
ENSG00000126861.4	-0.376641	0.565791
ENSG00000126878.11	0.00295647	0.92137
ENSG00000126883.15	0.0112347	0.287839
ENSG00000126903.14	0.0066925	0.357057
ENSG00000126950.7	0.0539019	0.183577
ENSG00000126953.5	0.04685	0.121622
ENSG00000127022.13	0.000444933	0.582469
ENSG00000127080.8	-0.158912	0.210661
ENSG00000127081.12	-0.181928	0.137291
ENSG00000127083.7	-0.178472	0.350118
ENSG00000127191.16	0.00406969	0.752794
ENSG00000127241.15	0.00985621	0.654229
ENSG00000127311.8	-0.0916755	0.163029
ENSG00000127324.7	-0.00046033	0.345528
ENSG00000127337.5	-0.0198602	0.278606
ENSG00000127364.3	-0.128164	0.591135
ENSG00000127366.5	0.571297	0.180532
ENSG00000127412.5	-4.60535	0.30301
ENSG00000127511.8	0.0182939	0.150668
ENSG00000127527.12	0.00616275	0.781924
ENSG00000127533.3	-0.05462	0.47475
ENSG00000127540.10	-0.00883241	0.13802
ENSG00000127578.6	0.0480033	0.693735
ENSG00000127580.14	-0.00313036	0.754486
ENSG00000127585.10	-0.00737998	0.775335
ENSG00000127603.22	-0.000415105	0.820941
ENSG00000127666.9	-0.00566531	0.656725
ENSG00000127804.11	0.0125885	0.575355
ENSG00000127884.4	-0.00143514	0.584845
ENSG00000127920.5	-0.0406034	0.24801
ENSG00000127928.11	0.801156	0.0162618
ENSG00000127946.15	0.00272299	0.791605
ENSG00000127957.15	0.214439	0.10913
ENSG00000128000.14	-0.01389	0.636279
ENSG00000128016.5	0.000270636	0.832807
ENSG00000128159.10	0.0105998	0.137683
ENSG00000128191.12	0.0261705	0.116667
ENSG00000128218.7	-0.210887	0.514486
ENSG00000128228.4	-0.00490208	0.369919
ENSG00000128242.11	0.00882323	0.759859
ENSG00000128245.13	-0.0025831	0.517064
ENSG00000128253.12	-0.207673	0.746337
ENSG00000128268.11	-0.0111767	0.564265
ENSG00000128272.13	0.000866134	0.647477
ENSG00000128283.6	-0.0023949	0.37243
ENSG00000128294.14	-0.018355	0.308462
ENSG00000128310.2	-0.855194	0.707515
ENSG00000128340.13	-0.012475	0.17896
ENSG00000128394.15	0.0550236	0.565082
ENSG00000128422.14	-1.61187e-05	0.986437
ENSG00000128482.14	0.156475	0.353111
ENSG00000128510.9	0.382195	0.00364307
ENSG00000128563.12	0.061401	0.0100296
ENSG00000128564.6	0.00839127	0.760161
ENSG00000128567.15	-0.00409497	0.429873
ENSG00000128578.8	-0.040145	0.313853
ENSG00000128591.14	0.00189915	0.421276
ENSG00000128595.15	-0.00440294	0.180572
ENSG00000128596.15	0.124829	0.144211
ENSG00000128607.12	0.00456439	0.732046
ENSG00000128609.13	-0.00462009	0.581988
ENSG00000128610.10	-0.0341815	0.550624
ENSG00000128655.15	0.105494	0.0452336
ENSG00000128709.11	0.018093	0.0963562
ENSG00000128710.5	0.0128734	0.371775
ENSG00000128713.12	0.0563986	0.0490039
ENSG00000128714.5	0.0177719	0.0847201
ENSG00000128739.19	0.0208317	0.154947
ENSG00000128805.13	0.0398845	0.586875
ENSG00000128815.16	-0.0707378	0.128573
ENSG00000128849.10	0.0353613	0.106458
ENSG00000128881.15	-0.0335616	0.493589
ENSG00000128928.7	-0.00228397	0.758107
ENSG00000128944.12	-0.0191777	0.402232
ENSG00000129103.16	-0.000495439	0.880834
ENSG00000129158.9	0.0794832	0.00403575
ENSG00000129167.8	-0.114391	0.54713
ENSG00000129187.13	-0.011158	0.165298
ENSG00000129204.15	-0.190662	0.656321
ENSG00000129226.12	-0.176947	0.371788
ENSG00000129295.7	-0.0411434	0.351712
ENSG00000129315.8	-0.0144951	0.346734
ENSG00000129347.18	0.0155642	0.262499
ENSG00000129354.10	-0.00207227	0.533486
ENSG00000129355.6	-0.0278571	0.525615
ENSG00000129450.7	-0.0984293	0.431164
ENSG00000129451.10	0.0014986	0.356789
ENSG00000129460.14	0.0245508	0.230314
ENSG00000129480.11	-0.0317074	0.270854
ENSG00000129636.11	0.00886474	0.413128
ENSG00000129646.12	0.104017	0.31073
ENSG00000129691.14	-0.0229878	0.100508
ENSG00000129749.3	0.0798335	0.782336
ENSG00000129757.11	0.0260753	0.0522154
ENSG00000129910.6	-0.409866	0.545825
ENSG00000129911.7	-0.0111042	0.315851
ENSG00000129946.9	0.0159364	0.251666
ENSG00000129988.5	0.0480655	0.335725
ENSG00000129991.11	0.11164	0.0203347
ENSG00000129993.13	-0.00552595	0.77771
ENSG00000130005.10	0.0299499	0.572685
ENSG00000130158.12	0.0051965	0.280547
ENSG00000130177.13	0.0108203	0.0710501
ENSG00000130182.6	0.00486191	0.993931
ENSG00000130201.6	0.0301583	0.674299
ENSG00000130203.8	-0.000471809	0.758031
ENSG00000130208.8	-0.0153863	0.248975
ENSG00000130255.11	-0.000959369	0.0929039
ENSG00000130270.15	-0.274633	0.380021
ENSG00000130287.12	-0.926978	0.635701
ENSG00000130307.10	0.0439005	0.83026
ENSG00000130309.9	-0.00480334	0.199921
ENSG00000130312.5	-0.0256022	0.017096
ENSG00000130377.12	0.373448	0.636934
ENSG00000130402.10	0.000407039	0.394075
ENSG00000130414.10	-0.00258387	0.621394
ENSG00000130427.2	-4.97198	0.319033
ENSG00000130433.6	-0.79311	0.767795
ENSG00000130475.13	0.0094717	0.424519
ENSG00000130489.11	-0.0238702	0.133976
ENSG00000130508.9	-0.00181333	0.564451
ENSG00000130511.14	-0.00174532	0.794735
ENSG00000130513.6	0.000778109	0.439385
ENSG00000130517.12	0.0194387	0.0109197
ENSG00000130518.15	-0.0367481	0.655293
ENSG00000130545.14	-0.0103918	0.328303
ENSG00000130561.15	-1.16191	0.6101
ENSG00000130595.15	0.771421	0.0599222
ENSG00000130598.14	-0.00733572	0.986967
ENSG00000130600.14	0.00264174	0.110993
ENSG00000130640.12	0.00397713	0.535526
ENSG00000130643.7	1.05234	0.0940323
ENSG00000130656.4	0.028514	0.900386
ENSG00000130684.12	0.12457	0.178501
ENSG00000130695.12	-0.0810573	0.0167727
ENSG00000130702.12	0.00395719	0.0018399
ENSG00000130703.14	0.0107119	0.0201557
ENSG00000130706.11	0.00123613	0.441129
ENSG00000130713.14	-0.0139171	0.471231
ENSG00000130714.14	-0.00215643	0.887122
ENSG00000130717.11	-0.0015483	0.931441
ENSG00000130720.11	-0.00416596	0.706659
ENSG00000130723.16	0.00190198	0.597326
ENSG00000130762.13	0.000316512	0.959724
ENSG00000130779.18	-0.00261353	0.770715
ENSG00000130783.12	-2.11788	0.143981
ENSG00000130787.12	0.00788463	0.0936038
ENSG00000130812.9	0.675947	0.276243
ENSG00000130827.6	0.00799696	0.0694568
ENSG00000130830.13	0.0139795	0.0363381
ENSG00000130844.15	-0.0140415	0.712497
ENSG00000130881.12	0.00253846	0.655251
ENSG00000130943.6	-1.13812	0.0457215
ENSG00000130950.12	1.45639	0.71874
ENSG00000130957.4	-0.121132	0.870544
ENSG00000130958.10	-0.0121012	0.281455
ENSG00000130985.15	0.00088833	0.220221
ENSG00000130997.15	0.0859728	0.625391
ENSG00000131015.4	0.0104248	0.811946
ENSG00000131043.10	0.0108457	0.141068
ENSG00000131116.10	0.00158403	0.942409
ENSG00000131127.12	-0.0269646	0.590039
ENSG00000131153.7	-0.00154477	0.877496
ENSG00000131174.4	-0.00183425	0.429203
ENSG00000131183.9	-5.83216	0.205166
ENSG00000131187.8	-0.00720117	0.551933
ENSG00000131188.10	-0.0254665	0.239215
ENSG00000131203.11	0.00304976	0.00723725
ENSG00000131263.11	-0.00263143	0.663709
ENSG00000131368.6	0.00602454	0.586678
ENSG00000131379.8	-2.51319	0.239744
ENSG00000131381.11	-0.0201984	0.596872
ENSG00000131389.15	0.0018507	0.285012
ENSG00000131398.12	-0.0241594	0.824552
ENSG00000131408.12	0.00275669	0.654367
ENSG00000131409.11	0.105105	0.547598
ENSG00000131446.14	-0.00305106	0.436028
ENSG00000131459.11	-0.0249237	0.412873
ENSG00000131469.11	-0.000756168	0.194261
ENSG00000131471.5	0.00187886	0.685563
ENSG00000131475.5	-0.00197813	0.801492
ENSG00000131584.17	0.00560678	0.44903
ENSG00000131591.16	-0.0134544	0.631829
ENSG00000131747.13	6.53207e-05	0.977225
ENSG00000131748.14	0.00529262	0.00652638
ENSG00000131759.16	0.00700296	0.464475
ENSG00000131771.12	0.000531251	0.0788956
ENSG00000131788.14	0.00180349	0.9468
ENSG00000131914.9	0.00424396	0.984083
ENSG00000131966.12	-0.00953975	0.48783
ENSG00000131969.13	0.00646505	0.697009
ENSG00000132004.11	-0.0266	0.305906
ENSG00000132010.14	-1.46809	0.0511985
ENSG00000132155.10	-0.00592651	0.648662
ENSG00000132185.15	-0.125265	0.643844
ENSG00000132196.12	0.0124059	0.596024
ENSG00000132205.9	-0.070538	0.0152546
ENSG00000132326.10	0.0151518	0.354272
ENSG00000132356.10	0.00496085	0.311841
ENSG00000132382.13	0.00361759	0.488759
ENSG00000132386.9	-0.000995364	0.781985
ENSG00000132388.11	-0.0270362	0.0922019
ENSG00000132405.17	-0.0239695	0.168896
ENSG00000132406.10	-0.0591734	0.0854971
ENSG00000132464.10	-2.29427	0.0957262
ENSG00000132467.3	-0.0116516	0.647818
ENSG00000132510.9	0.00877371	0.223614
ENSG00000132535.17	0.013596	0.75863
ENSG00000132554.18	-1.35472	0.326296
ENSG00000132561.12	0.00336912	0.61661
ENSG00000132563.14	-0.000516646	0.995961
ENSG00000132570.13	-0.0745524	0.285521
ENSG00000132604.9	0.0212165	0.353946
ENSG00000132612.15	0.00737771	0.502861
ENSG00000132613.13	0.0181385	0.522071
ENSG00000132670.19	0.000925612	0.883461
ENSG00000132676.14	-0.00500893	0.403896
ENSG00000132677.11	0.23523	0.599619
ENSG00000132680.9	0.00959127	0.189271
ENSG00000132681.15	-1.62141	0.588499
ENSG00000132688.10	0.0120417	0.000401261
ENSG00000132698.12	8.21044e-05	0.971257
ENSG00000132744.6	0.00154986	0.832098
ENSG00000132746.13	-0.116286	0.167923
ENSG00000132749.9	-0.0530703	0.157637
ENSG00000132768.12	0.00139986	0.886433
ENSG00000132793.10	0.0144232	0.00435019
ENSG00000132832.8	-0.136498	0.742904
ENSG00000132855.4	-0.623347	0.59077
ENSG00000132881.10	0.00871502	0.920126
ENSG00000132912.11	-0.0146335	0.214429
ENSG00000132953.15	-0.00312797	0.709946
ENSG00000133048.11	-0.00801643	0.297562
ENSG00000133055.7	-7.22225	0.078471
ENSG00000133067.16	0.00623682	0.218288
ENSG00000133103.15	-0.00157496	0.896587
ENSG00000133104.11	-0.0178877	0.557069
ENSG00000133121.19	0.0142397	0.272213
ENSG00000133135.12	0.00721592	0.00685926
ENSG00000133138.18	0.00686342	0.782152
ENSG00000133142.16	0.0180271	0.0249462
ENSG00000133169.5	0.0512619	0.284621
ENSG00000133193.11	-0.0456695	0.326275
ENSG00000133195.10	0.00679564	0.497783
ENSG00000133243.7	0.000295364	0.916281
ENSG00000133246.10	-0.0573033	0.669055
ENSG00000133250.12	-0.017814	0.504321
ENSG00000133265.9	-0.000315885	0.937161
ENSG00000133275.14	-0.00633857	0.351264
ENSG00000133392.15	0.000135566	0.439008
ENSG00000133393.11	0.00602771	0.505028
ENSG00000133422.11	0.0487384	0.000395171
ENSG00000133466.12	-0.0157953	0.39581
ENSG00000133488.13	0.0755498	0.275801
ENSG00000133519.11	0.0126964	0.575927
ENSG00000133612.17	0.0021783	0.660779
ENSG00000133624.12	0.103853	0.00491582
ENSG00000133627.16	-0.00402587	0.92746
ENSG00000133657.13	0.000387581	0.902937
ENSG00000133687.14	-0.0689749	0.184722
ENSG00000133706.16	0.00367499	0.502414
ENSG00000133789.13	6.08721e-05	0.996252
ENSG00000133816.12	-0.00106242	0.757936
ENSG00000133818.11	0.0130143	0.604153
ENSG00000133835.13	0.00269169	0.439124
ENSG00000133884.8	0.0115602	0.474168
ENSG00000133961.18	-0.00581112	0.555639
ENSG00000133962.6	-0.229189	0.192747
ENSG00000133983.13	0.00886005	0.66446
ENSG00000134049.4	-0.0130429	0.399258
ENSG00000134056.10	-0.0195697	0.393593
ENSG00000134057.13	-0.00366013	0.389957
ENSG00000134058.9	-0.0147931	0.429702
ENSG00000134070.4	-0.00312232	0.89
ENSG00000134138.18	-0.0163113	0.692886
ENSG00000134160.12	-0.41042	0.764306
ENSG00000134184.11	0.0155913	0.466449
ENSG00000134201.9	-0.110524	0.620052
ENSG00000134202.9	0.0116898	0.21252
ENSG00000134222.15	-0.0222747	0.473551
ENSG00000134242.14	-0.153198	0.0810381
ENSG00000134243.10	0.000261585	0.953551
ENSG00000134245.16	-0.0255056	0.630693
ENSG00000134285.9	-0.0104722	0.326187
ENSG00000134287.8	-0.000569035	0.855567
ENSG00000134313.13	0.00220952	0.759532
ENSG00000134318.12	-0.000222844	0.951899
ENSG00000134323.10	0.00102895	0.987257
ENSG00000134330.17	-0.0126734	0.416988
ENSG00000134333.12	0.000350348	0.48404
ENSG00000134339.7	-0.0192967	0.618037
ENSG00000134375.9	-0.00745427	0.449545
ENSG00000134398.11	0.00346251	0.354436
ENSG00000134419.14	0.000101022	0.870818
ENSG00000134460.14	-0.244719	0.0246984
ENSG00000134480.12	-0.0121825	0.579892
ENSG00000134489.6	-4.59786	0.0940676
ENSG00000134539.15	-0.203779	0.0594524
ENSG00000134545.12	-1.47957	0.0742292
ENSG00000134571.9	-0.0474376	0.957467
ENSG00000134612.10	-0.269063	0.939167
ENSG00000134686.15	0.00168459	0.728002
ENSG00000134762.15	-0.00458046	0.609082
ENSG00000134780.8	0.0128437	0.349768
ENSG00000134812.6	-0.08139	0.415374
ENSG00000134815.17	0.0136752	0.216409
ENSG00000134827.6	-0.00323887	0.55508
ENSG00000134830.5	-0.0568457	0.720037
ENSG00000134853.10	-0.0183754	0.178295
ENSG00000134884.12	0.00827713	0.0360404
ENSG00000134899.16	0.0495798	0.000628726
ENSG00000134962.6	-0.916315	0.096191
ENSG00000135040.14	-0.0379351	0.194792
ENSG00000135047.13	-0.00420233	0.372722
ENSG00000135070.12	-0.0465251	0.0603881
ENSG00000135083.13	-0.0319934	0.329972
ENSG00000135093.11	-0.0217958	0.586547
ENSG00000135114.11	-0.00828058	0.584781
ENSG00000135144.6	0.0978238	0.101379
ENSG00000135220.9	-0.00579763	0.576316
ENSG00000135245.9	0.00395733	0.642191
ENSG00000135249.6	-0.0245949	0.392762
ENSG00000135250.15	-0.0178287	0.323336
ENSG00000135253.12	0.111652	0.0448897
ENSG00000135317.11	-0.00345174	0.729959
ENSG00000135324.5	-0.029858	0.254187
ENSG00000135372.7	0.010634	0.00611084
ENSG00000135387.18	-0.00017949	0.932534
ENSG00000135390.16	-0.00249406	0.243197
ENSG00000135392.14	0.0361594	0.251016
ENSG00000135407.9	-0.0541876	0.390885
ENSG00000135409.9	-6.6202	0.178289
ENSG00000135436.7	-0.132333	0.757045
ENSG00000135439.10	-0.0389039	0.374201
ENSG00000135452.8	0.00853596	0.567126
ENSG00000135457.8	0.0175551	0.30229
ENSG00000135476.10	0.00119325	0.941619
ENSG00000135477.10	-0.526521	0.637354
ENSG00000135482.5	-0.0603019	0.613744
ENSG00000135503.11	0.0114863	0.0745996
ENSG00000135506.14	0.00357928	0.0376271
ENSG00000135537.15	-0.0466943	0.628648
ENSG00000135596.16	0.011403	0.00781326
ENSG00000135605.11	0.014269	0.847553
ENSG00000135625.7	0.184376	0.519056
ENSG00000135632.10	0.0267475	0.0516063
ENSG00000135702.13	-0.0493401	0.282505
ENSG00000135740.15	-0.074406	0.707177
ENSG00000135747.10	-0.543468	0.451843
ENSG00000135821.15	-0.000348022	0.774802
ENSG00000135828.10	-0.0353916	0.382444
ENSG00000135829.15	-0.000528323	0.897939
ENSG00000135835.9	0.0648185	0.50406
ENSG00000135838.12	-0.0358243	0.307993
ENSG00000135902.8	0.0678898	0.00749019
ENSG00000135916.14	-0.000170372	0.743742
ENSG00000135919.11	0.00282605	0.372745
ENSG00000135924.14	0.0165318	0.0128975
ENSG00000135925.7	0.0772154	0.0194397
ENSG00000135929.7	0.00620521	0.258552
ENSG00000136040.7	-0.0578911	0.0708042
ENSG00000136045.10	-0.0165522	0.22361
ENSG00000136059.13	-0.00337533	0.441974
ENSG00000136098.15	0.0116698	0.0999655
ENSG00000136100.11	0.00783422	0.123691
ENSG00000136114.14	-0.0106628	0.913226
ENSG00000136147.15	0.00325099	0.838542
ENSG00000136193.15	-0.00264617	0.638205
ENSG00000136197.11	-0.387808	0.496091
ENSG00000136238.16	-0.00260939	0.176206
ENSG00000136240.8	-0.00278915	0.18165
ENSG00000136243.15	-0.0200198	0.373011
ENSG00000136250.10	-0.031325	0.0253094
ENSG00000136271.9	0.00276373	0.678192
ENSG00000136273.10	-0.0390793	0.297064
ENSG00000136279.17	0.000481673	0.862727
ENSG00000136286.13	-0.0447511	0.236937
ENSG00000136327.6	0.782762	0.0735107
ENSG00000136352.16	0.0164885	0.192418
ENSG00000136381.11	-0.00717072	0.479574
ENSG00000136404.14	-0.400925	0.156135
ENSG00000136444.8	0.0215907	0.297139
ENSG00000136463.7	-0.00397526	0.838446
ENSG00000136485.13	0.00177997	0.522238
ENSG00000136492.7	-0.0390626	0.31526
ENSG00000136560.12	-0.00913955	0.636675
ENSG00000136574.16	-0.00628258	0.870851
ENSG00000136603.12	0.000409815	0.899127
ENSG00000136628.16	-0.00262128	0.470678
ENSG00000136631.11	-0.0229563	0.449579
ENSG00000136682.13	0.0733041	0.176227
ENSG00000136688.9	-0.0727205	0.771836
ENSG00000136695.13	-1.45868	0.313896
ENSG00000136731.11	0.00354674	0.483805
ENSG00000136783.9	-0.0270247	0.111132
ENSG00000136807.10	0.00339394	0.752508
ENSG00000136811.15	0.0201745	0.0992605
ENSG00000136819.13	0.020547	0.109791
ENSG00000136826.13	-0.00590058	0.174553
ENSG00000136827.11	-0.000754279	0.960333
ENSG00000136828.17	0.0401513	0.033385
ENSG00000136840.17	-0.00368539	0.656027
ENSG00000136842.12	0.0377059	0.691722
ENSG00000136856.16	-0.00132697	0.837458
ENSG00000136877.13	-0.00227628	0.649273
ENSG00000136881.10	-0.0246796	0.549767
ENSG00000136883.11	0.0100429	0.010718
ENSG00000136895.17	0.0636058	0.44436
ENSG00000136908.16	-0.00432034	0.600893
ENSG00000136928.4	-0.535408	0.587049
ENSG00000136929.11	0.387997	0.644334
ENSG00000136931.8	-0.267022	0.669582
ENSG00000136932.12	-0.165851	0.0283306
ENSG00000136982.5	-0.00498736	0.825005
ENSG00000137038.7	-0.00475721	0.37972
ENSG00000137054.14	0.00451167	0.84376
ENSG00000137078.7	0.0125928	0.664555
ENSG00000137090.10	0.0368375	0.686025
ENSG00000137098.12	0.197108	0.637736
ENSG00000137100.14	-0.0136064	0.183459
ENSG00000137135.16	-0.0303088	0.321446
ENSG00000137145.19	-0.00280447	0.692957
ENSG00000137154.11	-0.000199879	0.165298
ENSG00000137161.15	0.00251341	0.630692
ENSG00000137171.13	0.00923766	0.0614033
ENSG00000137203.9	-0.0574961	0.129067
ENSG00000137204.13	-0.128469	0.939588
ENSG00000137207.10	0.000621743	0.856039
ENSG00000137218.9	0.0459973	0.186307
ENSG00000137221.13	0.00695147	0.232097
ENSG00000137270.10	0.717691	0.145489
ENSG00000137274.11	0.01468	0.605663
ENSG00000137275.12	0.0209931	0.304947
ENSG00000137288.8	-0.0133366	0.283958
ENSG00000137331.11	0.0028037	0.0303853
ENSG00000137337.13	0.0143913	0.0923971
ENSG00000137338.5	0.0818173	0.46857
ENSG00000137343.16	0.0247929	0.0584292
ENSG00000137404.13	-0.0105509	0.664932
ENSG00000137414.5	-0.00324203	0.770075
ENSG00000137460.7	-0.00287837	0.81639
ENSG00000137463.4	-0.786105	0.643884
ENSG00000137474.18	0.0247498	0.0649975
ENSG00000137486.15	-0.0163893	0.241149
ENSG00000137496.16	-0.0104834	0.645516
ENSG00000137501.15	-0.00370264	0.561274
ENSG00000137504.12	0.0127089	0.0688122
ENSG00000137513.8	-0.00331817	0.859637
[truncated: 6,293 more rows]

## Sheet: CG.DFI.HNSC
Gene	Coefficient	Logrank p-value
ENSG00000000460.15	0.0032277	0.922689
ENSG00000000938.11	0.0578196	0.0119375
ENSG00000001167.13	-0.00966434	0.616722
ENSG00000001617.10	-0.00278414	0.486206
ENSG00000002834.16	0.0022978	0.419732
ENSG00000003096.12	-0.0316338	0.294979
ENSG00000003393.13	0.0147312	0.502194
ENSG00000003400.13	0.00849012	0.398941
ENSG00000003402.18	0.0030108	0.528414
ENSG00000003989.15	-0.000654176	0.909977
ENSG00000004660.13	-0.0345598	0.178849
ENSG00000004779.8	-0.00257912	0.763435
ENSG00000004809.12	0.420703	0.0843783
ENSG00000004838.12	0.0235237	0.95357
ENSG00000004975.10	-0.0265543	0.136496
ENSG00000005059.14	-0.00866545	0.48338
ENSG00000005075.14	-0.00763189	0.482767
ENSG00000005187.10	-0.397026	0.166312
ENSG00000005189.18	-0.102917	0.266114
ENSG00000005249.11	0.0214353	0.528463
ENSG00000005339.11	-0.00815968	0.109219
ENSG00000005379.14	0.0105912	0.613503
ENSG00000005486.15	-0.00660231	0.327975
ENSG00000005801.15	0.0164905	0.600385
ENSG00000005961.16	-0.756579	0.0832261
ENSG00000005981.11	0.611174	0.0413872
ENSG00000006047.11	-0.0419461	0.320098
ENSG00000006062.12	0.00887972	0.276535
ENSG00000006071.10	0.400652	0.328909
ENSG00000006210.6	-0.00457219	0.184083
ENSG00000006282.18	-0.00383662	0.730516
ENSG00000006283.16	-0.0310424	0.713889
ENSG00000006327.12	-0.000121185	0.964546
ENSG00000006534.14	-0.00255126	0.760492
ENSG00000006607.12	-0.00749989	0.4611
ENSG00000006704.9	-0.0193007	0.116144
ENSG00000006744.17	-0.0123552	0.179829
ENSG00000006756.14	-0.00322394	0.759662
ENSG00000006757.10	0.0209869	0.283715
ENSG00000007038.9	-0.0367627	0.362831
ENSG00000007047.13	-0.0150087	0.221322
ENSG00000007080.9	-0.00313827	0.609182
ENSG00000007168.11	-0.00480701	0.242854
ENSG00000007216.13	-0.0525908	0.83095
ENSG00000007237.17	0.00430449	0.47952
ENSG00000007264.12	0.0482001	0.259799
ENSG00000007312.11	0.0336081	0.315459
ENSG00000007314.10	0.0862448	0.000247932
ENSG00000007341.17	0.0672037	0.413253
ENSG00000007392.15	-0.0119634	0.482733
ENSG00000007402.10	-0.270293	0.399605
ENSG00000007516.12	-0.0964664	0.215612
ENSG00000007541.13	-0.0126401	0.305794
ENSG00000007933.11	-0.0271196	0.469595
ENSG00000008056.11	0.22656	0.0392093
ENSG00000008130.14	-0.00524266	0.66909
ENSG00000008283.14	-0.0104196	0.160132
ENSG00000008516.15	0.0478566	0.195729
ENSG00000008517.15	0.00193688	0.0630335
ENSG00000008853.15	0.0117845	0.485864
ENSG00000009724.15	-0.463867	0.491355
ENSG00000010256.9	0.000201024	0.930635
ENSG00000010319.5	0.0352501	0.453647
ENSG00000010322.14	0.00640912	0.556266
ENSG00000010327.9	0.0112888	0.000581291
ENSG00000010379.14	0.229423	0.853
ENSG00000010539.10	-0.0735129	0.210075
ENSG00000010610.8	0.00980269	0.00795223
ENSG00000010626.13	-0.0418652	0.564683
ENSG00000010704.17	0.02192	0.549473
ENSG00000011083.7	-1.80107	0.313585
ENSG00000011143.15	-0.0667079	0.279011
ENSG00000011304.15	-0.00218878	0.475907
ENSG00000011376.8	0.0350708	0.102896
ENSG00000011422.10	0.00295161	0.575523
ENSG00000011451.16	-0.0223067	0.0463792
ENSG00000011485.13	-0.00831877	0.541704
ENSG00000011523.12	-0.0158418	0.393053
ENSG00000012061.14	-0.0199146	0.102003
ENSG00000012124.13	-0.0049345	0.912819
ENSG00000012211.11	-0.0131393	0.646949
ENSG00000012817.14	-0.0289901	0.0381121
ENSG00000012983.10	-0.0103889	0.380292
ENSG00000013275.6	-0.0154988	0.0616215
ENSG00000013306.14	-0.00146688	0.515128
ENSG00000013441.14	0.00675423	0.408
ENSG00000013561.16	0.0320622	0.129731
ENSG00000013588.5	-0.000251515	0.8966
ENSG00000014138.7	-0.00400794	0.798832
ENSG00000014216.14	-3.2407e-05	0.968088
ENSG00000014824.12	0.003735	0.777988
ENSG00000015285.9	0.045243	0.0405233
ENSG00000015520.13	-0.0955178	0.711446
ENSG00000015676.16	-0.00933631	0.1506
ENSG00000016402.11	-0.0415414	0.0888113
ENSG00000016864.15	0.0227813	0.178945
ENSG00000017483.13	0.000874817	0.64617
ENSG00000018280.15	0.0295679	0.141521
ENSG00000018408.13	-0.00279651	0.618383
ENSG00000018625.13	0.0151663	0.00191112
ENSG00000018699.10	0.00159082	0.954482
ENSG00000019102.10	0.00671186	0.823188
ENSG00000019505.6	-0.0119053	0.863797
ENSG00000019995.6	0.00117247	0.966823
ENSG00000020181.16	0.00501945	0.520828
ENSG00000020426.9	-0.0127131	0.601704
ENSG00000020633.17	-0.00355406	0.587586
ENSG00000021300.12	0.0238915	0.342518
ENSG00000021488.11	0.228608	0.717511
ENSG00000021762.18	0.0027731	0.883021
ENSG00000021776.9	-0.00306823	0.764136
ENSG00000022277.11	0.000418516	0.956479
ENSG00000022556.14	-0.00429293	0.502237
ENSG00000023330.13	0.00133971	0.89876
ENSG00000023445.12	-0.00561051	0.298631
ENSG00000023572.7	0.0151712	0.81343
ENSG00000023608.4	0.00698779	0.563983
ENSG00000023892.10	-0.0175047	0.211189
ENSG00000023902.12	0.0024964	0.587984
ENSG00000023909.8	0.00116355	0.498737
ENSG00000024422.10	-0.000284207	0.873663
ENSG00000025039.13	0.00966466	0.509036
ENSG00000025293.14	-0.016768	0.26328
ENSG00000025800.12	-0.00442335	0.550517
ENSG00000026950.15	0.00512421	0.487904
ENSG00000027847.12	-0.0109227	0.500736
ENSG00000028277.19	0.0285072	0.232339
ENSG00000029153.13	-0.00169849	0.571898
ENSG00000029363.14	0.000103501	0.992337
ENSG00000029534.18	0.00427428	0.67043
ENSG00000029559.6	0.122027	0.115079
ENSG00000029993.13	-0.000672732	0.827763
ENSG00000030110.11	-0.00250857	0.591709
ENSG00000031081.9	0.0077026	0.234705
ENSG00000033050.6	-0.00286926	0.687958
ENSG00000033100.13	-0.00316935	0.58513
ENSG00000033327.11	0.01604	0.408901
ENSG00000033867.15	0.00460992	0.687528
ENSG00000034510.5	-0.000210776	0.338806
ENSG00000035141.6	-0.0113879	0.431753
ENSG00000035862.11	0.000200391	0.800066
ENSG00000036054.11	-0.00443328	0.625475
ENSG00000036448.8	0.0469496	0.000216784
ENSG00000036530.7	-0.145699	0.710565
ENSG00000037280.14	0.0127991	0.551084
ENSG00000037757.12	0.00745557	0.759984
ENSG00000037965.5	-0.314878	0.148812
ENSG00000038358.13	-0.00790658	0.647414
ENSG00000038532.13	-0.0120108	0.442147
ENSG00000039068.17	-0.000109303	0.896015
ENSG00000039987.5	-0.031828	0.653901
ENSG00000040199.17	0.0249773	0.705263
ENSG00000040633.11	-0.0205501	0.174844
ENSG00000041357.14	0.00163278	0.467816
ENSG00000041802.9	-0.0177475	0.116973
ENSG00000041982.13	0.000111876	0.378061
ENSG00000042062.10	0.00506916	0.805234
ENSG00000042286.13	0.0214184	0.0565879
ENSG00000042753.10	-0.00289361	0.400809
ENSG00000043143.19	-0.00274465	0.348482
ENSG00000044090.7	-0.0269618	0.0816846
ENSG00000044446.10	-0.0106732	0.646871
ENSG00000046774.9	0.0171001	0.316066
ENSG00000047457.12	0.000552602	0.899644
ENSG00000047597.5	-0.0819131	0.234935
ENSG00000047617.13	-0.16448	0.692517
ENSG00000047634.13	0.0153587	0.701444
ENSG00000047849.20	0.000896458	0.376125
ENSG00000048544.5	-0.00615275	0.4758
ENSG00000049192.13	0.026921	0.343777
ENSG00000049245.11	0.00224195	0.647257
ENSG00000049246.13	0.00475798	0.514302
ENSG00000049656.12	-0.000264972	0.923291
ENSG00000049769.11	-0.0179426	0.810934
ENSG00000050405.12	-6.84634e-05	0.953177
ENSG00000050555.16	-0.000523455	0.979255
ENSG00000050748.16	0.0201914	0.432956
ENSG00000050767.14	-0.0666145	0.293462
ENSG00000051382.7	0.00190143	0.818208
ENSG00000051825.13	-0.00898367	0.784886
ENSG00000052344.14	-0.00811087	0.0424731
ENSG00000053254.14	-0.00449029	0.540925
ENSG00000053438.8	-0.000459056	0.994915
ENSG00000053501.11	-0.0427229	0.166974
ENSG00000053900.9	-0.00240822	0.895316
ENSG00000054118.12	7.95183e-05	0.99019
ENSG00000054179.10	0.0153486	0.309862
ENSG00000054219.10	0.0226538	0.18788
ENSG00000054392.11	-0.0388493	0.405032
ENSG00000054598.6	-0.00148376	0.910649
ENSG00000054938.14	0.136831	0.000238523
ENSG00000054965.9	-0.000796939	0.928
ENSG00000054967.11	0.00242442	0.943976
ENSG00000054983.15	-0.0241427	0.298718
ENSG00000055211.11	-0.0018681	0.894842
ENSG00000055483.18	-0.0198708	0.20186
ENSG00000055917.14	-0.00594466	0.313988
ENSG00000055955.14	0.366083	0.438505
ENSG00000055957.9	-0.700119	0.632788
ENSG00000056558.9	0.00376104	0.735628
ENSG00000056586.14	0.00232791	0.750945
ENSG00000057252.11	0.0125096	0.254669
ENSG00000057468.6	-0.807448	0.796659
ENSG00000057593.12	-0.0868366	0.839856
ENSG00000058453.15	-0.00397592	0.654309
ENSG00000058600.14	-0.0239893	0.252199
ENSG00000058673.14	0.00215026	0.736109
ENSG00000058729.9	0.0438013	0.100355
ENSG00000059145.17	0.00661806	0.870992
ENSG00000059573.7	0.00449227	0.56989
ENSG00000059915.15	-0.0462043	0.594519
ENSG00000060140.7	-0.0509296	0.431654
ENSG00000060558.3	-0.0026132	0.400517
ENSG00000060642.9	-0.00965547	0.808211
ENSG00000061273.16	-0.00451532	0.605862
ENSG00000062096.13	0.251771	0.348753
ENSG00000062524.14	0.0716944	0.209177
ENSG00000062822.11	-0.00407104	0.659842
ENSG00000063015.18	0.216325	0.751232
ENSG00000063046.16	-0.000676541	0.740309
ENSG00000063127.14	-0.089855	0.759591
ENSG00000063241.6	-0.00344687	0.603999
ENSG00000063244.11	-0.00971547	0.115596
ENSG00000063515.2	-7.89298	0.136901
ENSG00000064012.20	-0.00258805	0.881323
ENSG00000064201.14	0.0967335	0.0476231
ENSG00000064218.4	0.0490914	0.276059
ENSG00000064313.10	0.00705166	0.559909
ENSG00000064545.13	-0.0197785	0.273452
ENSG00000064547.12	-0.0466536	0.113587
ENSG00000064601.15	0.00111193	0.674823
ENSG00000064652.9	0.00621995	0.885918
ENSG00000064666.13	0.00203675	0.319971
ENSG00000064687.11	-0.00439536	0.747251
ENSG00000064886.12	0.00623103	0.442646
ENSG00000064961.17	-0.00504174	0.506537
ENSG00000064999.13	-0.0137505	0.112466
ENSG00000065029.13	0.00642659	0.793687
ENSG00000065060.15	-0.0221283	0.144528
ENSG00000065268.9	-0.00255449	0.785747
ENSG00000065328.15	-0.0207754	0.346786
ENSG00000065371.16	-0.0403126	0.918339
ENSG00000065615.12	0.00297525	0.911471
ENSG00000065665.19	-0.0421834	0.669417
ENSG00000065717.13	-0.0331351	0.23803
ENSG00000065802.10	0.00343503	0.885906
ENSG00000065978.16	-0.000602039	0.477667
ENSG00000066084.11	-0.00218772	0.516081
ENSG00000066117.13	-0.00694682	0.484585
ENSG00000066279.15	-0.00593507	0.507423
ENSG00000066336.10	0.0281749	0.000827136
ENSG00000066379.13	-0.0358926	0.217767
ENSG00000066422.4	-0.000736277	0.969786
ENSG00000066629.15	-0.0135022	0.231525
ENSG00000066651.16	0.0452779	0.397529
ENSG00000066654.11	-0.0370424	0.0880281
ENSG00000066926.9	0.0182852	0.463721
ENSG00000067177.13	0.0121322	0.592874
ENSG00000067182.6	0.000472132	0.866878
ENSG00000067191.14	0.0386409	8.17725e-05
ENSG00000067225.16	-0.000169509	0.388586
ENSG00000067334.12	0.000620265	0.95028
ENSG00000067596.9	-0.0163945	0.135685
ENSG00000067829.17	-0.0111875	0.253126
ENSG00000067840.11	-0.0489499	0.47876
ENSG00000067900.6	0.00125189	0.895755
ENSG00000067955.12	0.00134191	0.921507
ENSG00000067992.11	-0.022428	0.675612
ENSG00000068001.12	0.00863031	0.448757
ENSG00000068079.6	0.00209094	0.330796
ENSG00000068120.13	-0.00567762	0.467578
ENSG00000068137.13	-0.0150354	0.220949
ENSG00000068308.12	-0.00711407	0.522826
ENSG00000068400.12	-0.00443228	0.740149
ENSG00000068615.15	0.0155322	0.16554
ENSG00000068724.14	-0.0124513	0.170401
ENSG00000068745.13	-0.00447042	0.753244
ENSG00000068781.19	1.37262	0.661756
ENSG00000068831.17	0.0912936	0.212115
ENSG00000069399.11	-0.00438864	0.462943
ENSG00000069493.13	0.000695401	0.985819
ENSG00000069712.10	-0.0679144	0.772872
ENSG00000069956.10	-0.00304102	0.21508
ENSG00000069966.17	-0.0310623	0.108118
ENSG00000070214.14	-0.00138556	0.564427
ENSG00000070404.8	0.00123603	0.707669
ENSG00000070444.13	-0.0230166	0.217164
ENSG00000070476.13	-0.0252652	0.210782
ENSG00000070601.8	0.021455	0.855117
ENSG00000070729.12	-0.00378634	0.521774
ENSG00000070731.8	-0.0111453	0.0851942
ENSG00000070785.15	0.000822358	0.966409
ENSG00000070808.14	0.127715	0.000360266
ENSG00000070831.14	-0.000543358	0.837723
ENSG00000070915.8	0.389874	0.344996
ENSG00000070950.8	-0.00114677	0.96889
ENSG00000071127.15	0.000372587	0.795265
ENSG00000071564.13	-0.00129849	0.809773
ENSG00000071626.15	-0.0013147	0.804734
ENSG00000071655.16	-0.00367786	0.492506
ENSG00000071859.13	-0.00457834	0.390304
ENSG00000071889.15	-0.0123774	0.212347
ENSG00000072042.11	-0.0105285	0.137576
ENSG00000072062.12	0.00224773	0.814045
ENSG00000072134.14	-0.0290858	0.0318343
ENSG00000072195.13	0.0196873	0.111868
ENSG00000072415.7	-0.0196398	0.185129
ENSG00000072736.17	-0.0203515	0.294174
ENSG00000072818.10	0.0117351	0.600103
ENSG00000072832.13	-0.00334608	0.807507
ENSG00000072858.9	0.0509163	0.108973
ENSG00000072958.7	-0.00779695	0.503637
ENSG00000073008.13	-0.00710621	0.455665
ENSG00000073146.14	-0.324189	0.349827
ENSG00000073150.12	0.00548064	0.660742
ENSG00000073464.10	0.0335804	0.160708
ENSG00000073670.12	-0.768792	0.167928
ENSG00000073711.9	-0.000110362	0.986852
ENSG00000073734.8	0.632838	0.000391897
ENSG00000073737.15	0.00137487	0.859646
ENSG00000073905.8	0.248627	0.889891
ENSG00000074266.16	0.027801	0.294729
ENSG00000074319.11	0.0063725	0.486521
ENSG00000074370.16	0.00327414	0.656525
ENSG00000074527.10	0.0237423	0.118427
ENSG00000074590.12	0.0144056	0.0157835
ENSG00000074660.14	0.0956035	0.0456777
ENSG00000074842.6	0.00184167	0.625848
ENSG00000074966.9	0.22044	0.396275
ENSG00000075340.21	0.0110116	0.472747
ENSG00000075426.10	-0.00155843	0.323013
ENSG00000076003.4	-0.00509047	0.394168
ENSG00000076043.8	0.0168752	0.01639
ENSG00000076067.10	0.00189005	0.79146
ENSG00000076108.10	-0.00218818	0.602898
ENSG00000076248.9	-0.0119248	0.260498
ENSG00000076258.8	-0.0546058	0.519033
ENSG00000076321.9	0.0168636	0.608966
ENSG00000076554.14	-0.0010955	0.808844
ENSG00000076555.14	0.0359057	0.23861
ENSG00000076650.5	-0.0468416	0.449188
ENSG00000076706.13	-0.000184807	0.958241
ENSG00000076864.18	-0.0259495	0.255884
ENSG00000076928.16	-0.00573913	0.364533
ENSG00000077009.12	0.0517141	0.00157245
ENSG00000077044.8	0.0266356	0.166553
ENSG00000077147.13	0.00592562	0.0995783
ENSG00000077279.15	-0.121084	0.797181
ENSG00000077454.14	0.000744948	0.988286
ENSG00000077498.8	-0.144448	0.688341
ENSG00000077616.9	-0.0385115	0.857291
ENSG00000077713.17	0.000666633	0.954793
ENSG00000077782.18	0.00115191	0.73855
ENSG00000078070.10	-0.00552504	0.6607
ENSG00000078081.6	-0.00102615	0.779351
ENSG00000078124.10	0.002186	0.806255
ENSG00000078142.10	0.0252166	0.125851
ENSG00000078319.8	-0.0236964	0.765332
ENSG00000078399.14	0.0188684	0.646837
ENSG00000078596.9	0.013312	0.483482
ENSG00000078747.11	-0.00547505	0.456773
ENSG00000078898.6	-0.0018336	0.547202
ENSG00000079246.14	0.00174893	0.452096
ENSG00000079277.18	0.00136502	0.952484
ENSG00000079313.10	-0.0097335	0.571056
ENSG00000079335.16	0.0189441	0.813465
ENSG00000079337.14	-0.0173817	0.217247
ENSG00000079387.12	-0.0379477	0.136825
ENSG00000079393.19	0.0699797	0.00032809
ENSG00000079432.6	-0.00382855	0.452506
ENSG00000079459.11	-0.00162471	0.59741
ENSG00000079616.11	-0.00969423	0.202263
ENSG00000079805.15	-0.000760619	0.872073
ENSG00000079950.12	0.0270153	0.104147
ENSG00000079999.12	-0.00242792	0.696801
ENSG00000080224.16	-0.152646	0.696078
ENSG00000080644.14	-0.35855	0.408782
ENSG00000080854.13	-0.0821479	0.465959
ENSG00000081051.6	0.0558937	0.96602
ENSG00000081148.11	-0.293733	0.771212
ENSG00000081154.10	0.00163863	0.813418
ENSG00000081181.6	-0.0433422	0.233646
ENSG00000081248.9	0.0357384	0.000221276
ENSG00000081307.11	0.0132005	0.478266
ENSG00000081692.11	-0.0329186	0.322517
ENSG00000081760.15	-0.00947948	0.209578
ENSG00000081803.14	-0.00945437	0.663268
ENSG00000081818.3	-0.056096	0.686105
ENSG00000081853.14	-0.163733	0.459077
ENSG00000082068.7	0.00357313	0.848567
ENSG00000082074.14	0.00557798	0.150938
ENSG00000082126.16	0.0568439	0.605647
ENSG00000082153.16	0.001558	0.620875
ENSG00000082269.15	-0.00656265	0.41977
ENSG00000082397.14	0.0030257	0.696318
ENSG00000082512.13	0.0657507	0.14655
ENSG00000082781.10	-0.00165568	0.42832
ENSG00000083099.9	-0.0038883	0.889036
ENSG00000083123.13	-0.0373012	0.49429
ENSG00000083223.16	0.00130183	0.831036
ENSG00000083444.15	-0.000485698	0.768445
ENSG00000083642.17	0.000721287	0.966113
ENSG00000083782.6	-0.256054	0.593434
ENSG00000083807.8	-0.0345855	0.414983
ENSG00000083812.10	-0.0825866	0.219206
ENSG00000083838.14	-0.137932	0.134421
ENSG00000083844.9	-0.0113803	0.586739
ENSG00000083845.7	-0.000601487	0.425174
ENSG00000083896.11	0.000380416	0.974788
ENSG00000084092.6	0.00285866	0.899447
ENSG00000084652.14	-0.0145187	0.0715683
ENSG00000084693.14	-0.023066	0.305027
ENSG00000084764.9	0.0123534	0.453324
ENSG00000085063.13	0.000605265	0.406286
ENSG00000085117.10	-0.000325179	0.879085
ENSG00000085274.14	-0.00780746	0.760581
ENSG00000085377.12	-0.00268434	0.803604
ENSG00000085433.14	0.00030152	0.973977
ENSG00000085465.12	-0.0308064	0.877584
ENSG00000085552.15	-0.00281217	0.594598
ENSG00000085644.12	-0.0609566	0.0337706
ENSG00000085662.12	0.00215626	0.421668
ENSG00000085831.14	-0.0126527	0.446238
ENSG00000085832.15	0.00128446	0.918831
ENSG00000085978.20	-0.000758159	0.97397
ENSG00000085998.12	-0.00144916	0.840108
ENSG00000086015.19	0.000188022	0.988621
ENSG00000086159.11	-0.0869907	0.851808
ENSG00000086475.13	-0.0234925	0.176388
ENSG00000086506.2	-0.580706	0.691717
ENSG00000086589.10	-0.00417346	0.828363
ENSG00000086619.12	0.00289203	0.869875
ENSG00000086730.15	0.0692851	0.0173555
ENSG00000086848.13	0.137755	0.100997
ENSG00000086967.9	0.00883254	2.52794e-05
ENSG00000087008.14	0.00935955	0.577049
ENSG00000087076.7	0.0274258	0.581728
ENSG00000087077.10	-0.00336469	0.441639
ENSG00000087085.12	0.0635261	6.45061e-05
ENSG00000087086.12	0.000234146	0.130479
ENSG00000087087.17	-0.0139408	0.0972997
ENSG00000087088.18	-0.000356535	0.956931
ENSG00000087111.19	0.00340962	0.707953
ENSG00000087152.14	-0.0119475	0.147647
ENSG00000087191.11	-0.00332067	0.364047
ENSG00000087237.9	-0.00439055	0.987784
ENSG00000087245.11	0.00014015	0.674609
ENSG00000087253.10	0.012288	0.112083
ENSG00000087266.14	-0.00561198	0.52419
ENSG00000087274.15	-0.00070778	0.842934
ENSG00000087338.4	-0.0170094	0.47357
ENSG00000087502.16	0.00825335	0.498367
ENSG00000087589.15	0.184407	0.0172096
ENSG00000087995.14	-0.0416147	0.440598
ENSG00000088002.10	-0.00117368	0.53469
ENSG00000088205.11	0.000227668	0.974535
ENSG00000088247.14	-0.00349173	0.343217
ENSG00000088256.7	-0.00494677	0.599712
ENSG00000088280.17	-0.00303482	0.804579
ENSG00000088367.19	-0.00206302	0.580473
ENSG00000088538.12	-0.0120562	0.946174
ENSG00000088826.16	-0.0335502	0.0198994
ENSG00000088827.11	0.0247139	0.0237978
ENSG00000088899.13	-0.0387697	0.2817
ENSG00000089012.13	0.0541494	0.209072
ENSG00000089041.15	-0.00260186	0.941151
ENSG00000089057.13	-0.0129825	0.379813
ENSG00000089063.13	0.00309103	0.605765
ENSG00000089101.16	0.922248	7.74477e-05
ENSG00000089127.11	-0.000224907	0.901843
ENSG00000089169.13	-1.07009	0.586452
ENSG00000089280.17	-0.00222258	0.426917
ENSG00000089351.13	0.00487024	0.520776
ENSG00000089558.7	-1.46892	0.120918
ENSG00000089597.15	0.000768836	0.536897
ENSG00000089639.9	0.0132067	0.598258
ENSG00000089685.13	-0.00116306	0.838463
ENSG00000089692.7	0.00780655	0.220163
ENSG00000089775.10	-0.0933766	0.12825
ENSG00000090006.16	-0.00681623	0.0825275
ENSG00000090097.19	-0.00244477	0.848948
ENSG00000090263.14	6.19906e-05	0.993999
ENSG00000090316.14	-0.0126491	0.135958
ENSG00000090382.5	0.00078962	0.164645
ENSG00000090447.10	-0.0621843	0.0350742
ENSG00000090470.13	-0.0268912	0.480493
ENSG00000090512.10	-0.0109709	0.569828
ENSG00000090554.11	-0.0412074	0.719626
ENSG00000090615.11	-0.0167741	0.0369834
ENSG00000090621.12	-0.000250716	0.880445
ENSG00000090659.16	0.0193539	0.0486618
ENSG00000090674.14	0.025654	0.222782
ENSG00000090686.14	-0.0137113	0.463533
ENSG00000090863.10	-0.00313711	0.30645
ENSG00000090924.13	0.00491096	0.759237
ENSG00000090932.9	-0.0987168	0.62864
ENSG00000090975.11	-0.00648712	0.742023
ENSG00000091039.15	0.000893811	0.905095
ENSG00000091073.18	-0.00542364	0.468308
ENSG00000091106.17	0.689295	0.000193987
ENSG00000091317.7	0.013277	0.00890931
ENSG00000091490.9	0.000611397	0.873545
ENSG00000091513.13	0.00718548	0.305688
ENSG00000091536.15	-0.127793	0.790114
ENSG00000091542.8	-0.0161361	0.0631492
ENSG00000091844.6	-0.0521448	0.628323
ENSG00000091947.8	0.00714046	0.654944
ENSG00000092010.13	-0.000136857	0.936751
ENSG00000092054.12	0.00110121	0.00804497
ENSG00000092067.5	-0.232487	0.560653
ENSG00000092068.17	-0.000886871	0.369621
ENSG00000092096.13	-0.0518105	0.241539
ENSG00000092108.19	-0.00544179	0.679628
ENSG00000092140.13	-0.00527528	0.857506
ENSG00000092199.16	-0.000260692	0.900689
ENSG00000092208.15	-0.00709993	0.897095
ENSG00000092295.10	-0.000224691	0.580255
ENSG00000092330.14	-0.012972	0.158852
ENSG00000092377.12	-3.25053	0.0897931
ENSG00000092439.12	-0.0138403	0.382522
ENSG00000092758.14	-0.0393335	0.416564
ENSG00000092871.15	-0.0101079	0.593158
ENSG00000092929.10	0.00198166	0.812651
ENSG00000093134.12	-0.0156202	0.726953
ENSG00000094631.17	-0.00719845	0.664078
ENSG00000094796.4	0.0642778	0.105871
ENSG00000094804.8	-0.0103008	0.388458
ENSG00000094914.11	-0.0309962	0.1681
ENSG00000095059.14	0.00454066	0.711469
ENSG00000095203.13	-0.00698366	0.588015
ENSG00000095261.12	0.00972664	0.354172
ENSG00000095370.18	0.0220753	0.367122
ENSG00000095383.18	-0.00079505	0.85978
ENSG00000095397.12	-0.0195498	0.405667
ENSG00000095464.9	2.40711	0.199867
ENSG00000095485.15	-0.0101531	0.675829
ENSG00000095539.14	0.0409674	0.517869
ENSG00000095585.15	0.00481829	0.707246
ENSG00000095587.8	0.0694775	0.0107108
ENSG00000095627.8	0.0262197	0.0970743
ENSG00000095739.10	0.0040235	0.0872914
ENSG00000095752.5	0.00489982	0.733397
ENSG00000095970.15	0.00445447	0.666197
ENSG00000096092.5	-0.0102235	0.432743
ENSG00000096401.7	-0.0110685	0.424993
ENSG00000096433.9	-0.00119304	0.474915
ENSG00000096717.10	0.0158152	0.646997
ENSG00000097007.16	-0.00159442	0.771108
ENSG00000097096.8	-0.168046	0.333674
ENSG00000099204.17	-0.000923769	0.402807
ENSG00000099260.9	0.00487866	0.51343
ENSG00000099308.9	0.000902724	0.976831
ENSG00000099330.7	-0.0382883	0.394868
ENSG00000099337.4	-0.00113022	0.761795
ENSG00000099338.21	-0.978441	0.0818583
ENSG00000099341.10	-0.00534265	0.318595
ENSG00000099385.10	-0.00956271	0.310493
ENSG00000099399.5	-0.00129715	0.934385
ENSG00000099617.3	-0.863103	0.548586
ENSG00000099624.6	-0.0010514	0.738482
ENSG00000099800.6	0.000770238	0.858495
ENSG00000099804.7	-0.00347803	0.667979
ENSG00000099812.7	0.00347762	0.532712
ENSG00000099814.14	-0.00838716	0.0182341
ENSG00000099821.12	-0.005508	0.649444
ENSG00000099864.16	-0.0226901	0.252512
ENSG00000099875.13	-0.000294407	0.811413
ENSG00000099901.15	-0.00224813	0.580601
ENSG00000099904.14	-0.0221713	0.0916923
ENSG00000099942.11	-0.0103869	0.0231699
ENSG00000099954.17	0.0100458	0.716403
ENSG00000099957.15	0.292498	0.0142564
ENSG00000099960.11	-0.0327315	0.611992
ENSG00000099974.7	-0.331224	0.350202
ENSG00000099985.3	0.0408311	0.11008
ENSG00000099991.15	-0.00282315	0.754705
ENSG00000099992.14	-0.00995589	0.535991
ENSG00000099994.10	0.02246	0.189095
ENSG00000099998.16	0.00761738	0.30487
ENSG00000100012.10	0.639703	0.859741
ENSG00000100023.16	-0.0377348	0.0403517
ENSG00000100031.17	-0.0132445	0.493087
ENSG00000100034.12	-0.00474005	0.705657
ENSG00000100038.18	-0.39252	0.593194
ENSG00000100053.8	-0.653457	0.32759
ENSG00000100056.10	-0.092997	0.010448
ENSG00000100060.16	0.0466122	0.0718829
ENSG00000100065.13	-0.00445737	0.366776
ENSG00000100068.10	-0.122281	0.417719
ENSG00000100083.17	-0.0259988	0.138172
ENSG00000100092.19	-0.00773582	0.197424
ENSG00000100095.17	0.0230787	0.0963736
ENSG00000100097.10	-0.000147456	0.771527
ENSG00000100101.14	-0.437026	0.879552
ENSG00000100106.18	-0.0267476	0.260889
ENSG00000100116.15	-0.014388	0.422958
ENSG00000100122.5	0.956034	0.157175
ENSG00000100139.12	-0.00270641	0.185061
ENSG00000100142.13	-1.61661	0.491693
ENSG00000100147.12	-0.206262	0.0674008
ENSG00000100156.9	-0.196335	0.443282
ENSG00000100170.8	-0.0129428	0.234169
ENSG00000100197.19	-0.513233	0.303994
ENSG00000100206.8	0.08038	0.561184
ENSG00000100207.17	-0.0124051	0.0512749
ENSG00000100220.10	-0.00564355	0.344155
ENSG00000100226.14	-0.0106177	0.216528
ENSG00000100276.9	-0.174586	0.787375
ENSG00000100280.15	-0.0038253	0.184922
ENSG00000100281.12	-0.00840242	0.665416
ENSG00000100292.15	0.000663233	0.794473
ENSG00000100297.14	-0.00267534	0.430045
ENSG00000100298.14	0.119083	0.584724
ENSG00000100335.11	-0.012313	0.280463
ENSG00000100348.8	-0.0042172	0.529815
ENSG00000100350.13	-0.0141236	0.146636
ENSG00000100353.16	-0.00123177	0.604896
ENSG00000100359.19	-0.000951676	0.934771
ENSG00000100373.8	1.90545	0.271902
ENSG00000100385.12	0.00764478	0.230581
ENSG00000100399.14	-0.0361973	0.639172
ENSG00000100401.18	-0.00445843	0.075856
ENSG00000100403.11	-0.00687035	0.169602
ENSG00000100425.17	-0.0167152	0.219952
ENSG00000100426.6	-0.01692	0.235443
ENSG00000100427.14	-0.45298	0.222981
ENSG00000100441.8	-0.00843656	0.200511
ENSG00000100445.15	0.0213349	0.847594
ENSG00000100478.13	-0.0716511	0.17328
ENSG00000100479.11	-0.0333512	0.441515
ENSG00000100490.8	-0.217137	0.288562
ENSG00000100519.10	-0.00344488	0.682249
ENSG00000100522.7	-0.0265769	0.0957028
ENSG00000100567.11	-0.00161748	0.745717
ENSG00000100568.9	-0.00903176	0.257962
ENSG00000100592.14	-0.00379223	0.347583
ENSG00000100593.16	-0.00308048	0.95597
ENSG00000100596.5	-0.00665137	0.205281
ENSG00000100628.10	0.0146124	0.429236
ENSG00000100652.4	-9.31781	0.0726573
ENSG00000100714.14	-0.00689944	0.143186
ENSG00000100726.13	-0.0242169	0.0791367
ENSG00000100749.6	-0.00579737	0.776593
ENSG00000100802.13	-0.0707485	0.421927
ENSG00000100804.17	-1.28581e-05	0.997019
ENSG00000100842.11	-0.0215148	0.03191
ENSG00000100884.8	-0.680971	0.534616
ENSG00000100908.12	-0.0272973	0.440576
ENSG00000100918.11	-0.00861424	0.705746
ENSG00000100926.13	-0.0237292	0.718428
ENSG00000100949.13	-0.0111875	0.23643
ENSG00000100979.13	0.000410478	0.834695
ENSG00000100997.17	0.000660199	0.935856
ENSG00000101049.13	-0.14356	0.514349
ENSG00000101052.11	0.0102453	0.61167
ENSG00000101084.15	-0.00399399	0.745964
ENSG00000101096.18	0.0262272	0.0827242
ENSG00000101104.11	-0.0113837	0.726213
ENSG00000101146.11	-0.0213457	0.15413
ENSG00000101161.7	-0.00454917	0.370139
ENSG00000101203.15	-11.6378	0.145704
ENSG00000101220.16	0.00113161	0.842682
ENSG00000101222.11	0.0424109	0.957577
ENSG00000101236.15	0.00245262	0.891584
ENSG00000101255.9	0.0043634	0.667868
ENSG00000101294.15	-0.0028034	0.242827
ENSG00000101307.14	0.0653342	0.335327
ENSG00000101310.13	-0.00518382	0.552318
ENSG00000101311.14	-0.00143409	0.401125
ENSG00000101331.14	0.249498	0.235717
ENSG00000101336.11	0.031796	0.0053165
ENSG00000101337.14	-0.00653309	0.242003
ENSG00000101342.8	0.135476	0.228039
ENSG00000101367.8	-0.00310988	0.411956
ENSG00000101391.19	-0.018173	0.401406
ENSG00000101400.5	-0.000136034	0.987819
ENSG00000101443.16	0.00309434	0.170476
ENSG00000101445.8	0.0138881	0.246652
ENSG00000101447.12	-0.00817597	0.296867
ENSG00000101460.11	-0.00347247	0.818681
ENSG00000101489.17	-0.0702589	0.698256
ENSG00000101680.12	0.00374552	0.516291
ENSG00000101883.4	-0.860745	0.487248
ENSG00000101911.11	-0.000987445	0.903938
ENSG00000101928.11	-0.0344919	0.269955
ENSG00000101945.15	-0.0266563	0.327638
ENSG00000102001.11	-2.38672	0.052474
ENSG00000102003.9	0.0533234	0.706817
ENSG00000102007.9	-0.000112691	0.932065
ENSG00000102024.16	0.00208639	0.422265
ENSG00000102038.14	0.00540787	0.562387
ENSG00000102054.16	0.00173232	0.733944
ENSG00000102057.8	-0.0446374	0.655547
ENSG00000102078.14	-0.010224	0.891448
ENSG00000102096.9	0.00751239	0.0858613
ENSG00000102100.13	0.00570273	0.691271
ENSG00000102119.9	-0.0116673	0.197399
ENSG00000102145.12	-0.693192	0.764662
ENSG00000102178.11	-0.01934	0.091333
ENSG00000102195.8	-0.0100143	0.87152
ENSG00000102225.14	-0.00949235	0.175794
ENSG00000102226.8	-0.00470219	0.51503
ENSG00000102241.10	-0.00768028	0.366312
ENSG00000102245.6	0.0332621	0.882495
ENSG00000102359.5	0.00241846	0.886303
ENSG00000102384.12	-0.0336507	0.527783
ENSG00000102710.18	0.0208141	0.339232
ENSG00000102738.7	0.0593346	0.0822654
ENSG00000102760.12	-0.00975363	0.702527
ENSG00000102781.12	0.0366934	0.217763
ENSG00000102802.8	0.00105188	0.934627
ENSG00000102805.12	0.0744284	0.0700307
ENSG00000102854.13	-0.00116801	0.621344
ENSG00000102858.11	-0.00549757	0.684591
ENSG00000102870.5	-0.0319041	0.146802
ENSG00000102891.3	0.0284307	0.0906356
ENSG00000102898.10	-0.00158664	0.702896
ENSG00000102901.11	-0.0138178	0.286474
ENSG00000102908.19	-0.00619833	0.567089
ENSG00000102962.4	0.0162625	0.321067
ENSG00000103024.6	-0.0133472	0.318062
ENSG00000103034.13	-0.0094849	0.165783
ENSG00000103037.10	-0.0795738	0.122527
ENSG00000103043.13	-0.00936095	0.426427
ENSG00000103047.6	-0.0281594	0.419069
ENSG00000103064.12	0.00901374	0.736539
ENSG00000103066.11	0.0192389	0.313104
ENSG00000103067.10	-0.0053844	0.250721
ENSG00000103154.8	0.0843609	0.36573
ENSG00000103168.15	-0.0264276	0.201602
ENSG00000103196.10	0.000887452	0.850499
ENSG00000103202.11	-0.00890016	0.314327
ENSG00000103226.16	0.0430266	0.61049
ENSG00000103260.7	-0.0204095	0.201587
ENSG00000103264.14	0.00126328	0.959516
ENSG00000103269.12	-0.0723534	0.307752
ENSG00000103313.10	0.0256087	0.628096
ENSG00000103319.10	-0.00374573	0.708959
ENSG00000103335.18	-0.00278938	0.282269
ENSG00000103351.11	-0.000400682	0.984807
ENSG00000103355.11	1.99645	0.431705
ENSG00000103375.9	-2.2275	0.413992
ENSG00000103426.11	3.27891	0.495428
ENSG00000103460.15	0.0926097	0.54684
ENSG00000103485.16	-0.0624335	0.290579
ENSG00000103489.10	0.00209856	0.82515
ENSG00000103495.12	-0.0146523	0.162372
ENSG00000103507.12	-0.0105543	0.374406
ENSG00000103510.18	-0.0456292	0.0999264
ENSG00000103512.13	-0.0081131	0.510349
ENSG00000103534.15	0.00261873	0.920999
ENSG00000103540.15	-0.0140357	0.571785
ENSG00000103544.13	-0.0110094	0.29914
ENSG00000103550.12	-0.102833	0.0451456
ENSG00000103653.15	-0.00801366	0.291643
ENSG00000103657.12	-0.0062997	0.512819
ENSG00000103742.10	0.0713957	0.2153
ENSG00000103932.10	-0.0192086	0.34997
ENSG00000104055.13	-0.0111595	0.568166
ENSG00000104142.9	-0.00056744	0.96464
ENSG00000104205.11	-0.0544258	0.445552
ENSG00000104213.11	-0.0071021	0.716394
ENSG00000104218.12	0.0505669	0.296313
ENSG00000104219.11	0.00998116	0.481875
ENSG00000104221.11	-0.0470666	0.364171
ENSG00000104341.15	0.00246603	0.240378
ENSG00000104450.11	0.00115294	0.966878
ENSG00000104522.14	0.00170646	0.41016
ENSG00000104524.12	-0.0166565	0.304186
ENSG00000104529.16	-0.000199594	0.934667
ENSG00000104635.12	0.00156584	0.536524
ENSG00000104679.9	0.00424909	0.794481
ENSG00000104728.14	-0.00711927	0.660155
ENSG00000104731.12	-0.0210367	0.39284
ENSG00000104805.14	-0.00074693	0.728714
ENSG00000104808.6	-0.203318	0.35062
ENSG00000104823.7	-0.00682811	0.20586
ENSG00000104824.15	-0.0063789	0.258102
ENSG00000104826.10	0.109619	0.483422
ENSG00000104848.1	0.229239	0.00261512
ENSG00000104852.13	-0.00280704	0.464187
ENSG00000104856.12	-0.00571721	0.509933
ENSG00000104859.13	-0.0196055	0.351185
ENSG00000104863.10	-0.149996	0.166511
ENSG00000104870.11	0.00319125	0.460198
ENSG00000104884.13	-0.0126713	0.553155
ENSG00000104889.4	-0.00845221	0.410582
ENSG00000104918.6	2.72601	0.000225794
ENSG00000104941.6	-0.0843606	0.905921
ENSG00000104957.12	-0.0429686	0.153836
ENSG00000104964.13	-0.00279744	0.220328
ENSG00000104970.9	-0.540766	0.702997
ENSG00000104972.13	0.0863831	0.000621056
ENSG00000104974.9	0.529121	0.000318099
ENSG00000104976.10	-0.0144275	0.602226
ENSG00000104980.6	-0.00535188	0.741721
ENSG00000104983.7	-0.0165905	0.710268
ENSG00000105048.15	0.00156106	0.00247334
ENSG00000105058.10	-0.0106269	0.30391
ENSG00000105063.17	-0.00104217	0.879737
ENSG00000105085.9	-0.105075	0.230259
ENSG00000105122.11	0.0272732	0.258212
ENSG00000105131.6	-0.00504986	0.546516
ENSG00000105136.18	-0.0668005	0.503833
ENSG00000105137.11	-0.00820541	0.622127
ENSG00000105146.11	0.327445	0.0268559
ENSG00000105176.16	-0.0188665	0.159674
ENSG00000105197.9	-0.0135027	0.250631
ENSG00000105202.6	-0.00311099	0.295739
ENSG00000105205.6	0.864981	0.000951608
ENSG00000105219.7	-0.25775	0.164673
ENSG00000105221.15	-0.00339084	0.6344
ENSG00000105227.13	-0.00697043	0.949498
ENSG00000105270.13	0.00320815	0.718185
ENSG00000105278.9	-0.314495	0.226861
ENSG00000105289.13	-0.0127608	0.555287
ENSG00000105290.10	-0.0154143	0.784477
ENSG00000105298.12	-0.0098804	0.763892
ENSG00000105321.11	-0.0512825	0.0509802
ENSG00000105323.15	-0.00357271	0.175495
ENSG00000105325.12	-0.0100054	0.300586
ENSG00000105341.17	-0.00123248	0.948655
ENSG00000105355.7	-0.000268543	0.902981
ENSG00000105366.14	0.11107	0.308563
ENSG00000105369.8	0.00354067	0.573912
ENSG00000105370.6	-0.2183	0.487758
ENSG00000105372.5	-0.000363703	0.41354
ENSG00000105373.17	-0.00094712	0.619386
ENSG00000105374.8	0.00212545	0.828446
ENSG00000105379.8	-0.00251248	0.525629
ENSG00000105383.13	0.311791	0.0213597
ENSG00000105402.6	-0.00325148	0.57481
ENSG00000105404.9	-0.0037161	0.377954
ENSG00000105409.14	-0.0211288	0.870894
ENSG00000105419.16	-0.0189241	0.548519
ENSG00000105447.11	-0.0176917	0.223639
ENSG00000105497.6	0.0675897	0.333111
ENSG00000105499.12	0.0361233	0.209848
ENSG00000105523.3	-0.0260511	0.214834
ENSG00000105552.13	-0.0179916	0.234649
ENSG00000105576.14	-0.0175108	0.0440475
ENSG00000105583.8	-0.00358327	0.594275
ENSG00000105605.6	-0.0585722	0.908091
ENSG00000105607.11	-0.020625	0.507235
ENSG00000105609.15	0.0636132	0.0234602
ENSG00000105639.17	-0.00513372	0.769016
ENSG00000105642.14	0.00625914	0.940002
ENSG00000105643.8	-0.00700087	0.598519
ENSG00000105647.13	-0.250713	0.3128
ENSG00000105650.20	-0.133938	0.509373
ENSG00000105655.17	-0.0206993	0.096808
ENSG00000105656.11	0.00259515	0.884256
ENSG00000105668.6	-0.0159178	0.680356
ENSG00000105672.13	-0.388136	0.235276
ENSG00000105695.13	0.226213	0.763371
ENSG00000105697.6	-0.0337521	0.935238
ENSG00000105698.14	-0.00681307	0.379232
ENSG00000105699.15	-0.000269062	0.904085
ENSG00000105700.9	-0.00676318	0.642749
ENSG00000105701.14	-0.00164833	0.415069
ENSG00000105707.12	-0.0485816	0.485344
ENSG00000105711.9	0.068347	0.000305476
ENSG00000105717.12	-0.163414	0.316639
ENSG00000105726.15	-0.012528	0.187407
ENSG00000105737.8	-0.155653	0.544741
ENSG00000105755.6	-0.00506782	0.555074
ENSG00000105767.2	-0.0152381	0.0800757
ENSG00000105792.18	0.00481884	0.984278
ENSG00000105808.16	-0.403469	0.629851
ENSG00000105829.10	-0.0129043	0.644002
ENSG00000105852.9	0.0133271	0.644567
ENSG00000105854.11	0.0021794	0.840421
ENSG00000105856.12	-0.00116457	0.892267
ENSG00000105880.4	-0.00871953	0.618466
ENSG00000105894.10	-0.00389977	0.566885
ENSG00000105939.11	0.0043307	0.457542
ENSG00000105953.13	-0.00226402	0.379976
ENSG00000105996.6	0.114457	0.408929
ENSG00000105997.21	0.0321467	0.523759
ENSG00000106004.4	-0.0323107	0.746673
ENSG00000106006.6	-0.321818	0.544812
ENSG00000106066.12	0.0354765	8.71815e-05
ENSG00000106077.17	-0.0228684	0.286387
ENSG00000106123.10	-0.00678649	0.466601
ENSG00000106153.12	0.00155071	0.319749
ENSG00000106258.12	-0.00762312	0.784249
ENSG00000106261.15	-0.00919127	0.302448
ENSG00000106330.10	-0.0347612	0.285441
ENSG00000106333.11	-0.000675526	0.765085
ENSG00000106336.11	-0.721977	0.438442
ENSG00000106351.11	-0.028811	0.301985
ENSG00000106384.9	-2.22343	0.454715
ENSG00000106392.9	0.0075733	0.612928
ENSG00000106479.9	-0.0357901	0.486106
ENSG00000106484.13	-0.00423461	0.571356
ENSG00000106511.5	0.100255	0.307135
ENSG00000106537.7	-0.00721944	0.336986
ENSG00000106609.15	-0.00294444	0.703093
ENSG00000106615.8	0.011591	0.23427
ENSG00000106628.9	-7.22644e-05	0.983413
ENSG00000106631.7	0.0805307	0.440728
ENSG00000106633.14	-0.377328	0.421238
ENSG00000106682.13	-0.00133828	0.565096
ENSG00000106701.10	0.102852	0.130652
ENSG00000106771.11	0.00352307	0.648535
ENSG00000106785.13	0.000123037	0.979167
ENSG00000106789.11	-0.0107016	0.183917
ENSG00000106809.9	-0.0359216	0.393172
ENSG00000106823.11	-0.00272753	0.842415
ENSG00000106868.15	0.0782358	0.0684775
ENSG00000106927.10	0.194321	0.392152
ENSG00000106948.15	0.00715212	0.335299
ENSG00000106992.16	0.0395685	0.150123
ENSG00000107020.8	0.00437289	0.707637
ENSG00000107021.14	-0.00371786	0.858358
ENSG00000107159.11	-0.00606048	0.321232
ENSG00000107187.14	-0.075337	0.584971
ENSG00000107281.8	-0.00223651	0.759751
ENSG00000107317.10	0.00573667	0.296946
ENSG00000107331.15	0.000179677	0.980042
ENSG00000107404.16	-0.00314376	0.530921
ENSG00000107438.7	0.000852288	0.480773
ENSG00000107521.17	0.00990461	0.42743
ENSG00000107537.12	0.0496293	0.0982619
ENSG00000107566.12	-0.00729807	0.472371
ENSG00000107593.16	0.278945	0.0152154
ENSG00000107611.13	0.0527631	0.785798
ENSG00000107614.20	0.153799	0.221524
ENSG00000107625.11	0.00236009	0.905698
ENSG00000107672.13	0.00322491	0.893849
ENSG00000107738.18	0.00568113	0.240923
ENSG00000107742.11	0.00298126	0.530239
ENSG00000107829.12	-0.00770987	0.485004
ENSG00000107874.9	0.00305638	0.737044
ENSG00000107902.12	-0.0200916	0.287516
ENSG00000107951.11	-0.030385	0.322231
ENSG00000107960.9	-0.000590206	0.974667
ENSG00000108187.14	0.0970379	0.467486
ENSG00000108219.13	0.00175471	0.582385
ENSG00000108262.14	-0.00556372	0.37543
ENSG00000108309.11	-0.00817767	0.731601
ENSG00000108344.13	-0.00335985	0.466572
ENSG00000108349.13	-0.012561	0.26976
ENSG00000108352.10	-0.00302833	0.263753
ENSG00000108375.11	0.00337533	0.773554
ENSG00000108387.13	0.092329	0.0880569
ENSG00000108389.8	-0.0197652	0.193327
ENSG00000108405.3	0.0167712	0.846608
ENSG00000108417.3	-0.0864933	0.461081
ENSG00000108448.19	0.00489194	0.465705
ENSG00000108468.13	-0.000327963	0.965714
ENSG00000108506.10	-0.0302674	0.333664
ENSG00000108511.9	0.0347133	0.520711
ENSG00000108557.16	-0.0144028	0.0865457
ENSG00000108578.13	-0.00278477	0.743653
ENSG00000108582.10	-0.00286954	0.559481
ENSG00000108587.13	-0.00443894	0.832747
ENSG00000108588.12	-0.00129967	0.831981
ENSG00000108592.15	-0.0155082	0.138729
ENSG00000108599.13	-0.0399238	0.245838
ENSG00000108604.14	-0.0140305	0.0667928
ENSG00000108622.9	0.0546254	0.40218
ENSG00000108639.6	-0.00191563	0.254517
ENSG00000108651.8	0.0130383	0.391624
ENSG00000108654.10	-0.000375191	0.803736
ENSG00000108669.15	0.00311953	0.571851
ENSG00000108671.8	-0.00170759	0.714341
ENSG00000108684.13	-0.119078	0.839944
ENSG00000108784.8	-0.00938096	0.49377
ENSG00000108785.7	-1.25926	0.203753
ENSG00000108786.9	-0.0471481	0.31528
ENSG00000108788.10	0.00204124	0.919508
ENSG00000108799.11	0.00959077	0.741966
ENSG00000108819.10	-0.00454456	0.379017
ENSG00000108821.12	-2.9844e-06	0.912015
ENSG00000108829.9	-0.00103282	0.702853
ENSG00000108840.14	-0.00996362	0.288283
ENSG00000108846.14	0.00341909	0.586061
ENSG00000108861.7	0.0164845	0.0664323
ENSG00000108946.13	-0.00186097	0.645812
ENSG00000108947.4	-0.024327	0.574953
ENSG00000108963.16	-0.0456996	0.28605
ENSG00000108984.12	9.75804e-06	0.999929
ENSG00000109047.7	0.337919	0.856273
ENSG00000109061.9	0.00800437	1.17078e-05
ENSG00000109063.13	0.00936704	0.0503668
ENSG00000109089.7	-0.0111934	0.413713
ENSG00000109099.12	0.00513958	0.135803
ENSG00000109101.6	-0.00866513	0.243203
ENSG00000109107.12	-0.0100759	0.36814
ENSG00000109118.12	-0.00958149	0.599219
ENSG00000109184.13	0.00439948	0.845242
ENSG00000109208.4	0.537935	0.497873
ENSG00000109255.10	-0.0263251	0.435705
ENSG00000109270.11	-0.000258889	0.989744
ENSG00000109272.3	-0.429905	0.517268
ENSG00000109458.7	0.000200453	0.986034
ENSG00000109654.13	-0.00366907	0.592237
ENSG00000109686.15	-0.00633542	0.352791
ENSG00000109705.7	-9.44504e-05	0.999509
ENSG00000109743.9	0.276803	0.0215621
ENSG00000109758.7	0.292035	0.380264
ENSG00000109790.15	-0.00193202	0.816394
ENSG00000109854.12	-0.000724152	0.885252
ENSG00000109881.15	-0.0157322	0.516197
ENSG00000109906.12	0.0751467	0.539064
ENSG00000109917.9	0.0104255	0.37202
ENSG00000109919.8	0.00772848	0.138616
ENSG00000109920.11	-0.00369095	0.751275
ENSG00000109943.7	0.0707965	0.449434
ENSG00000109944.9	0.043723	0.355345
ENSG00000109971.12	-5.21386e-05	0.878975
ENSG00000110011.12	-0.0124431	0.454165
ENSG00000110047.16	-0.000932641	0.751717
ENSG00000110075.13	0.00654401	0.185678
ENSG00000110076.17	0.0103537	0.619342
ENSG00000110090.11	0.000744853	0.800321
ENSG00000110169.9	-0.728714	0.345211
ENSG00000110171.17	0.028233	0.61323
ENSG00000110200.7	-0.00883666	0.718873
ENSG00000110237.3	0.00781342	0.469396
ENSG00000110330.7	-0.00157934	0.580356
ENSG00000110344.8	-0.00507845	0.624533
ENSG00000110455.12	0.00854661	0.825816
ENSG00000110492.14	0.000294976	0.812996
ENSG00000110497.13	0.00369139	0.787657
ENSG00000110619.15	0.00460884	0.557492
ENSG00000110651.10	0.001489	0.182393
ENSG00000110719.8	0.00252308	0.575871
ENSG00000110723.10	0.0017885	0.876478
ENSG00000110786.16	0.400188	0.0605867
ENSG00000110799.12	0.000148785	0.94092
ENSG00000110811.18	-0.00711883	0.367223
ENSG00000110841.12	0.0029955	0.63444
ENSG00000110881.10	0.000421107	0.993883
ENSG00000110917.6	-0.000392659	0.894377
ENSG00000110925.5	-0.0105278	0.728103
ENSG00000110934.9	0.0663821	0.028042
ENSG00000110955.7	3.86473e-05	0.96878
ENSG00000111046.3	0.0697015	1.77435e-05
ENSG00000111049.3	0.183147	0.0670243
ENSG00000111077.16	0.00183395	0.894369
ENSG00000111087.8	0.00354261	0.888003
ENSG00000111181.11	0.218012	0.198127
ENSG00000111196.8	0.011327	0.67209
ENSG00000111229.14	-5.47364e-05	0.98154
ENSG00000111266.7	-0.0109398	0.287389
ENSG00000111269.2	0.0210147	0.173952
ENSG00000111276.9	0.00536068	0.576572
ENSG00000111300.8	-0.0159754	0.456829
ENSG00000111319.11	-0.00082529	0.7544
ENSG00000111321.9	-0.000103198	0.967873
ENSG00000111331.11	-0.000485766	0.531306
ENSG00000111335.11	-0.000450303	0.64248
ENSG00000111348.7	0.00729007	0.00881221
ENSG00000111405.7	-0.00985494	0.347576
ENSG00000111424.9	-0.000599204	0.921561
ENSG00000111445.12	-0.0107353	0.532711
ENSG00000111490.11	-0.0276916	0.553377
ENSG00000111602.10	-0.0100672	0.179536
ENSG00000111615.11	-0.000645881	0.976369
ENSG00000111641.9	-0.00741355	0.418826
ENSG00000111642.13	-0.00583374	0.112326
ENSG00000111644.6	0.429635	0.170522
ENSG00000111652.8	-0.00340462	0.66539
ENSG00000111664.9	-0.119042	0.68416
ENSG00000111669.13	-0.000655483	0.343419
ENSG00000111670.13	0.000677978	0.934098
ENSG00000111676.13	-0.0042339	0.332263
ENSG00000111679.15	0.0170337	0.0627393
ENSG00000111684.9	0.0161945	0.425804
ENSG00000111716.11	-0.000194379	0.862007
ENSG00000111801.14	0.00272875	0.72016
ENSG00000111837.10	0.0404201	0.887703
ENSG00000111846.14	0.0091582	0.716112
ENSG00000111850.9	-0.0777863	0.497303
ENSG00000111860.12	0.185798	0.0284748
ENSG00000111911.6	-0.00185601	0.938244
ENSG00000111981.4	-0.0137779	0.683572
ENSG00000112031.14	-0.00330789	0.9721
ENSG00000112039.3	-0.0228161	0.192395
ENSG00000112159.10	0.00288762	0.785804
ENSG00000112195.8	0.299327	0.0572174
ENSG00000112200.15	-0.00864481	0.682298
ENSG00000112208.11	0.026528	0.158117
ENSG00000112212.10	-0.288111	0.60943
ENSG00000112242.13	-0.0161566	0.492078
ENSG00000112299.7	-0.0650703	0.210054
ENSG00000112303.12	0.0710157	0.574224
ENSG00000112308.11	0.00118577	0.716931
ENSG00000112319.16	0.02239	0.476401
ENSG00000112343.10	0.00502897	0.612062
ENSG00000112357.11	-0.0149615	0.854503
ENSG00000112486.13	0.784878	0.206459
ENSG00000112494.8	0.0117877	0.752281
ENSG00000112499.11	-1.56547	0.486132
ENSG00000112511.16	-0.014181	0.317614
ENSG00000112584.12	0.0126256	0.537485
ENSG00000112640.13	-0.0152625	0.207074
ENSG00000112655.14	-0.000965698	0.564614
ENSG00000112658.7	0.00349399	0.618006
ENSG00000112667.11	-0.00714393	0.600048
ENSG00000112701.16	-0.0102318	0.505375
ENSG00000112759.15	0.00652415	0.280197
ENSG00000112763.14	0.0187919	0.448804
ENSG00000112852.6	-0.0065293	0.867198
ENSG00000112874.8	0.0261885	0.649887
ENSG00000112893.8	0.00368721	0.558315
ENSG00000112941.11	0.00192376	0.871162
ENSG00000112964.12	-0.0322517	0.465747
ENSG00000113070.7	0.00199946	0.50693
ENSG00000113088.5	0.018317	0.488796
ENSG00000113194.11	-0.00275473	0.78374
ENSG00000113196.2	0.229337	0.87985
ENSG00000113205.4	-0.180623	0.559727
ENSG00000113209.8	-0.0631264	0.440432
ENSG00000113211.5	-0.170104	0.183023
ENSG00000113212.6	-0.0644289	0.515504
ENSG00000113262.13	-0.756727	0.665911
ENSG00000113269.12	0.00524606	0.572352
ENSG00000113272.12	0.0119392	0.714664
ENSG00000113273.14	0.0224575	0.377266
ENSG00000113300.10	0.00542909	0.601118
ENSG00000113312.9	0.00489813	0.671625
ENSG00000113387.10	-0.000428575	0.854809
ENSG00000113460.11	0.00239034	0.810512
ENSG00000113552.14	0.0200408	0.237405
ENSG00000113569.14	-0.00798154	0.464401
ENSG00000113594.8	0.00712381	0.337734
ENSG00000113600.9	0.268108	0.478039
ENSG00000113621.13	0.0168797	0.310256
ENSG00000113638.11	0.0484794	0.257152
ENSG00000113643.7	0.00455286	0.486877
ENSG00000113658.15	0.00310814	0.739405
ENSG00000113716.11	0.0136607	0.352272
ENSG00000113719.14	0.000321456	0.945808
ENSG00000113722.15	0.198987	0.71976
ENSG00000113732.7	0.00467021	0.273586
ENSG00000113758.12	-0.00412543	0.403437
ENSG00000113811.9	0.0104329	0.466272
ENSG00000113812.12	0.0479798	0.263817
ENSG00000113851.12	0.0154407	0.642527
ENSG00000113889.10	-0.636708	0.670677
ENSG00000113905.4	-0.451391	0.559779
ENSG00000113966.8	0.0138319	0.924678
ENSG00000114019.13	0.00544766	0.295335
ENSG00000114021.10	0.00118375	0.893541
ENSG00000114026.20	0.0128665	0.790446
ENSG00000114030.11	-0.00485383	0.625885
ENSG00000114126.16	-0.00267587	0.716628
ENSG00000114127.9	0.00285685	0.598384
ENSG00000114251.12	0.00373954	0.0802687
ENSG00000114268.10	0.00487107	0.652627
ENSG00000114270.14	0.000534019	0.218104
ENSG00000114315.3	-0.00787936	0.246561
ENSG00000114331.11	-0.00278828	0.530024
ENSG00000114349.8	1.81353	0.277692
ENSG00000114353.15	0.00251865	0.176443
ENSG00000114374.11	-0.0298558	0.0925718
ENSG00000114378.15	-0.00672429	0.640999
ENSG00000114383.8	0.0230762	0.304848
ENSG00000114391.11	-0.00028031	0.679547
ENSG00000114491.12	-0.010134	0.351978
ENSG00000114520.9	0.015588	0.526312
ENSG00000114529.11	0.00597612	0.832978
ENSG00000114544.14	0.0110226	0.463879
ENSG00000114626.16	0.00343084	0.790806
ENSG00000114646.8	-0.187403	0.399735
ENSG00000114654.7	0.13883	0.0343449
ENSG00000114686.7	0.00313776	0.62496
ENSG00000114744.7	-0.00451145	0.749443
ENSG00000114770.15	-0.000698125	0.747455
ENSG00000114771.12	0.0220073	0.710199
ENSG00000114854.6	0.00281454	0.000857149
ENSG00000114867.18	-0.00131903	0.09909
ENSG00000114904.11	0.0382429	0.386231
ENSG00000114956.18	-0.0169199	0.25512
ENSG00000114993.14	-0.0130687	0.0814784
ENSG00000115008.5	0.000941164	0.841463
ENSG00000115009.10	0.00401299	0.377697
ENSG00000115041.11	-0.0465501	0.418844
ENSG00000115053.14	0.000416723	0.591481
ENSG00000115204.13	-0.0171997	0.352212
ENSG00000115226.8	-0.0161666	0.696542
ENSG00000115266.10	-0.17689	0.0889004
ENSG00000115268.8	-0.00050528	0.662401
ENSG00000115275.10	-0.0248626	0.0352848
ENSG00000115286.18	0.00268148	0.75702
ENSG00000115289.11	-0.0345777	0.354636
ENSG00000115318.10	0.081374	0.0990325
ENSG00000115364.12	-0.0230111	0.248706
ENSG00000115504.13	-0.00594221	0.540522
ENSG00000115507.8	-0.0153541	0.557558
ENSG00000115520.7	0.011827	0.519049
ENSG00000115524.14	0.000144131	0.955044
ENSG00000115590.12	-0.000234771	0.910015
ENSG00000115594.10	0.00207959	0.673254
ENSG00000115596.3	-0.00557195	0.976887
ENSG00000115598.8	-0.050211	0.414076
ENSG00000115607.8	0.0973475	0.589588
ENSG00000115648.12	0.00281396	0.866255
ENSG00000115649.14	0.00603161	0.498883
ENSG00000115657.11	0.0203073	0.570733
ENSG00000115750.15	0.0104812	0.748344
ENSG00000115760.12	-0.00582939	0.315416
ENSG00000115808.10	-0.00390577	0.603364
ENSG00000115841.18	-0.0949724	0.472599
ENSG00000115850.8	-2.08294	0.213206
ENSG00000115902.9	-0.00233367	0.457859
ENSG00000115904.11	-0.00371431	0.724018
ENSG00000115935.15	0.00482891	0.292716
ENSG00000115998.6	-0.124502	0.233531
ENSG00000116001.14	-0.000172318	0.988866
ENSG00000116014.8	-1.07409	0.330753
ENSG00000116017.9	0.0237244	0.358858
ENSG00000116030.15	0.00543575	0.389424
ENSG00000116031.8	0.0231731	0.0519848
ENSG00000116032.5	-0.20959	0.186409
ENSG00000116035.2	0.0230623	0.825538
ENSG00000116039.10	0.007876	0.916782
ENSG00000116095.9	0.00441779	0.876666
ENSG00000116161.16	0.00241063	0.762785
ENSG00000116176.6	-1.88646	0.401826
ENSG00000116199.10	8.29219e-05	0.992571
ENSG00000116251.8	-0.000277539	0.906132
ENSG00000116254.16	-1.29789	0.208663
ENSG00000116266.9	0.0334069	0.147249
ENSG00000116396.12	-0.0291874	0.301622
ENSG00000116478.10	-0.000957128	0.803689
ENSG00000116489.11	0.00244164	0.401938
ENSG00000116525.12	-0.0190549	0.581943
ENSG00000116544.10	-0.536011	0.124518
ENSG00000116584.16	-0.00424999	0.637985
ENSG00000116604.16	0.00562499	0.423626
ENSG00000116649.8	-0.00312449	0.47199
ENSG00000116675.14	0.00303791	0.961258
ENSG00000116678.17	0.000136198	0.994252
ENSG00000116685.14	-0.00716484	0.430135
ENSG00000116688.15	-0.00203185	0.48563
ENSG00000116691.9	-0.00185471	0.87802
ENSG00000116729.12	0.00557715	0.266085
ENSG00000116741.7	0.00560197	0.455507
ENSG00000116748.18	0.0566483	0.0150359
ENSG00000116752.5	0.0256397	0.205706
ENSG00000116761.10	0.082691	0.518407
ENSG00000116771.5	-0.0654454	0.532733
ENSG00000116786.10	-0.00374791	0.433257
ENSG00000116815.14	0.0164873	0.488828
ENSG00000116857.15	-0.00257946	0.694706
ENSG00000116885.17	0.0544962	0.573653
ENSG00000116898.10	-0.00319279	0.632026
ENSG00000116957.11	0.00697364	0.797063
ENSG00000116962.13	0.000862376	0.692788
ENSG00000117000.8	-0.0137159	0.382184
ENSG00000117016.8	-0.00303668	0.775818
ENSG00000117069.13	-0.309611	0.222855
ENSG00000117118.8	0.00675766	0.460775
ENSG00000117122.12	-0.00119879	0.786381
ENSG00000117148.7	0.0271401	0.00923488
ENSG00000117153.14	0.00224007	0.901465
ENSG00000117154.10	0.18969	0.0278091
ENSG00000117155.15	0.00314074	0.859878
ENSG00000117222.12	-0.0056121	0.858367
ENSG00000117245.11	0.0818299	0.458364
ENSG00000117305.13	-0.0137139	0.466356
ENSG00000117308.13	-0.00516991	0.625072
ENSG00000117318.8	0.00211201	0.597558
ENSG00000117322.15	-0.025461	0.76923
ENSG00000117360.11	0.00824766	0.577954
ENSG00000117407.15	0.0152539	0.380642
ENSG00000117410.12	-0.000448693	0.867008
ENSG00000117411.15	-0.0031415	0.415744
ENSG00000117425.12	0.0738624	0.630177
ENSG00000117481.9	-0.0623535	0.111135
ENSG00000117533.13	0.0267269	0.584765
ENSG00000117586.9	-0.0221553	0.713644
ENSG00000117594.8	0.153773	0.0254395
ENSG00000117595.9	-0.00106245	0.418269
ENSG00000117682.15	-0.0248599	0.246413
ENSG00000117713.16	-0.0061917	0.197106
ENSG00000117751.16	-0.0159336	0.49147
ENSG00000117758.12	0.0130885	0.230521
ENSG00000117791.14	-0.0141267	0.861845
ENSG00000117859.17	-0.00896001	0.446351
ENSG00000117899.9	0.00377667	0.733426
ENSG00000117971.10	-0.0979129	0.376908
ENSG00000118017.3	2.26191	0.546359
ENSG00000118094.10	-0.430527	0.704921
ENSG00000118113.10	0.17606	0.385027
ENSG00000118156.11	-0.0268748	0.506591
ENSG00000118160.12	-0.712213	0.15568
ENSG00000118200.13	-0.000850943	0.885873
ENSG00000118242.14	-0.00731402	0.429227
ENSG00000118292.7	0.0890624	0.0246561
ENSG00000118402.5	-0.0256455	0.161001
ENSG00000118412.11	-0.00599617	0.811739
ENSG00000118473.20	0.082377	0.283468
ENSG00000118496.4	0.0168659	0.40942
ENSG00000118620.11	0.00721595	0.904597
ENSG00000118762.6	0.00998632	0.57092
ENSG00000118816.8	0.00082606	0.711472
ENSG00000118873.14	-0.00242174	0.881509
ENSG00000118961.13	-0.0182626	0.588316
ENSG00000119041.9	0.0173704	0.212288
ENSG00000119231.9	-0.0237478	0.0894728
ENSG00000119326.13	0.00383918	0.347126
ENSG00000119333.10	-0.000580563	0.883086
ENSG00000119335.15	0.00110689	0.51945
ENSG00000119392.13	0.00146284	0.878963
ENSG00000119403.12	-0.00471425	0.649844
ENSG00000119414.10	0.00420135	0.657028
ENSG00000119431.8	-0.00666216	0.696558
ENSG00000119535.16	0.0828293	0.000312812
ENSG00000119547.5	0.0133207	0.834322
ENSG00000119559.14	-0.0152088	0.467089
ENSG00000119574.11	-0.0833656	0.0973915
ENSG00000119640.7	-0.0533858	0.364583
ENSG00000119673.13	-0.00839717	0.843013
ENSG00000119681.10	-0.000194447	0.857135
ENSG00000119684.14	-0.0359398	0.41032
ENSG00000119689.13	-0.0104997	0.0965406
ENSG00000119718.9	-0.0248393	0.0830866
ENSG00000119737.5	-0.248572	0.557335
ENSG00000119777.17	-0.0149558	0.0851796
ENSG00000119820.9	-0.0140325	0.440405
ENSG00000119919.10	-0.0101474	0.780208
ENSG00000119922.8	0.00251734	0.366598
ENSG00000119943.9	0.0711699	0.369425
ENSG00000119977.19	0.0388489	0.0453498
ENSG00000120029.11	-0.000687561	0.966586
ENSG00000120049.17	0.0809338	0.805738
ENSG00000120068.6	0.0733738	0.173076
ENSG00000120075.5	0.100096	0.422619
ENSG00000120088.13	-2.58472	0.405595
ENSG00000120093.10	0.0104812	0.598547
ENSG00000120094.6	-0.593079	0.522004
ENSG00000120129.5	0.000307909	0.548463
ENSG00000120156.19	0.0363113	0.341655
ENSG00000120160.9	0.889008	0.770722
ENSG00000120306.8	0.0243346	0.0362749
ENSG00000120318.14	0.00316078	0.886486
ENSG00000120322.3	-0.302029	0.0904594
ENSG00000120324.6	-0.0778403	0.517208
ENSG00000120327.6	-0.0027683	0.905779
ENSG00000120328.6	-0.412812	0.0635207
ENSG00000120437.8	0.00506408	0.480953
ENSG00000120440.12	4.86472	0.111825
ENSG00000120451.9	0.00942584	0.156431
ENSG00000120669.14	0.0571379	0.349886
ENSG00000120686.10	0.00927661	0.350894
ENSG00000120693.12	-0.0281006	0.773068
ENSG00000120696.8	-0.0124305	0.764537
ENSG00000120697.7	0.029505	0.199361
ENSG00000120709.9	0.0133496	0.37128
ENSG00000120727.11	0.0243032	0.115362
ENSG00000120733.12	-0.0022442	0.751101
ENSG00000120738.7	0.00048316	0.258613
ENSG00000120784.14	-0.0218978	0.732409
ENSG00000120875.7	-0.00225411	0.727767
ENSG00000120910.13	0.0354898	0.114759
ENSG00000120913.22	-0.000978505	0.922382
ENSG00000120948.14	-0.00789387	0.327506
ENSG00000120963.10	-0.00081967	0.865762
ENSG00000121089.4	-0.0130126	0.90169
ENSG00000121152.8	-0.00829677	0.58747
ENSG00000121210.14	-0.0107646	0.425819
ENSG00000121211.6	-0.0181989	0.768844
ENSG00000121236.18	0.152536	0.0153659
ENSG00000121335.11	-5.34565	0.173788
ENSG00000121361.3	0.0271744	0.451322
ENSG00000121406.7	0.0571445	0.430741
ENSG00000121413.11	-0.024167	0.406824
ENSG00000121417.12	-0.0586984	0.370199
ENSG00000121446.16	-3.16509	0.188375
ENSG00000121542.10	-0.0315498	0.388003
ENSG00000121552.3	-0.000143193	0.564694
ENSG00000121570.11	-1.28154	0.597151
ENSG00000121653.10	0.026944	0.360991
ENSG00000121671.10	0.0308586	0.0958543
ENSG00000121680.14	0.00949362	0.244554
ENSG00000121690.8	0.0585982	0.0619218
ENSG00000121691.4	0.00791892	0.373908
ENSG00000121716.17	-0.0470232	0.438632
ENSG00000121775.16	-0.0705332	0.0821302
ENSG00000121807.5	0.0430245	0.191647
ENSG00000121864.8	-0.0031857	0.841065
ENSG00000121903.13	-0.149582	0.35529
ENSG00000121904.16	-0.0515934	0.273493
ENSG00000121940.14	0.0297041	0.540686
ENSG00000122012.12	0.142475	0.848463
ENSG00000122068.11	-0.00531186	0.282069
ENSG00000122085.15	0.0183214	0.636684
ENSG00000122133.15	-0.0605358	0.406272
ENSG00000122176.10	0.00144191	0.669005
ENSG00000122367.18	0.010591	0.00204073
ENSG00000122375.10	-0.179316	0.701683
ENSG00000122386.9	-0.0383347	0.260772
ENSG00000122406.11	0.0002021	0.743251
ENSG00000122417.14	-0.00422362	0.796879
ENSG00000122477.11	0.111607	0.00191902
ENSG00000122490.17	0.00316499	0.525671
ENSG00000122547.9	0.0597608	0.140675
ENSG00000122642.9	-0.000990351	0.712133
ENSG00000122694.14	-0.00643606	0.636192
ENSG00000122756.13	-0.0389037	0.523547
ENSG00000122877.12	0.00440908	0.438334
ENSG00000122884.11	0.00419698	0.374387
ENSG00000122912.13	0.0348932	0.488995
ENSG00000122958.13	0.00856946	0.30052
ENSG00000122971.7	0.00823043	0.692868
ENSG00000122986.12	0.0663163	0.105442
ENSG00000123144.9	-0.00206557	0.675
ENSG00000123159.14	-0.00160778	0.396075
ENSG00000123178.13	0.0383414	0.178154
ENSG00000123201.13	-0.381206	0.343529
ENSG00000123268.7	-0.0264859	0.477584
ENSG00000123297.15	-0.0108107	0.529087
ENSG00000123338.11	0.0134214	0.0366991
ENSG00000123342.14	-0.00198214	0.877859
ENSG00000123349.12	-0.00107565	0.65979
ENSG00000123352.16	-0.00802041	0.672371
ENSG00000123358.18	0.00172302	0.406618
ENSG00000123360.10	0.272475	0.0326554
ENSG00000123384.12	-0.000205125	0.816395
ENSG00000123388.4	-0.0537901	0.465248
ENSG00000123395.13	-0.0162914	0.399648
ENSG00000123407.3	0.061429	0.280157
ENSG00000123411.13	0.0621092	0.364813
ENSG00000123416.14	-0.000377219	0.764423
ENSG00000123453.15	0.0783042	0.421109
ENSG00000123595.6	0.0173486	0.338209
ENSG00000123609.9	0.00175355	0.835491
ENSG00000123689.5	-0.000141555	0.986764
ENSG00000123739.9	-0.00261036	0.916629
ENSG00000123838.9	0.129103	0.137016
ENSG00000123843.11	0.311699	0.771596
ENSG00000123870.10	0.0969302	0.787256
ENSG00000123933.13	-0.00288059	0.645986
ENSG00000123975.4	0.0066293	0.263744
ENSG00000123999.4	-0.357807	0.501859
ENSG00000124006.13	0.00679332	0.279088
ENSG00000124067.15	-0.000482885	0.948725
ENSG00000124092.11	-0.00703084	0.86233
ENSG00000124097.7	-0.251372	0.857994
ENSG00000124103.8	6.70796	0.0551528
ENSG00000124134.7	-0.0301572	0.308163
ENSG00000124143.9	0.0295027	0.205661
ENSG00000124155.15	0.00131528	0.688155
ENSG00000124157.6	-3.23746	0.519731
ENSG00000124193.13	-0.00138914	0.808921
ENSG00000124222.20	0.00721019	0.479796
ENSG00000124226.9	0.00726471	0.29769
ENSG00000124256.13	0.0209184	0.37456
ENSG00000124257.6	0.232219	0.636471
ENSG00000124313.11	-0.00992719	0.735589
ENSG00000124333.13	-0.00378194	0.784817
ENSG00000124356.14	-0.00824968	0.65483
ENSG00000124391.4	-0.350824	0.449534
ENSG00000124440.14	-0.422357	0.193833
ENSG00000124466.8	-0.000141281	0.656911
ENSG00000124486.11	7.87927e-05	0.980158
ENSG00000124496.11	-0.0166937	0.260037
ENSG00000124508.15	0.0166325	0.385223
ENSG00000124541.6	-0.0145904	0.17988
ENSG00000124549.13	-0.0216138	0.890258
ENSG00000124587.12	-0.00775569	0.344645
ENSG00000124588.18	-0.0167041	0.268549
ENSG00000124593.13	-0.0460905	0.397565
ENSG00000124608.4	-0.0759027	0.0858804
ENSG00000124657.1	-1.06865	0.234486
ENSG00000124701.5	0.0547414	9.10832e-05
ENSG00000124762.12	-0.000730045	0.506007
ENSG00000124766.5	-0.0056751	0.164283
ENSG00000124795.13	-0.00111513	0.662075
ENSG00000124802.10	0.00761845	0.845379
ENSG00000124831.17	-0.000239774	0.934782
ENSG00000124875.8	0.00462439	0.412539
ENSG00000124920.12	-0.0640359	0.232543
ENSG00000124942.12	-8.77799e-05	0.664512
ENSG00000125046.13	1.11462	0.0568207
ENSG00000125084.10	-0.42868	0.912993
ENSG00000125089.15	-7.53886e-06	0.99922
ENSG00000125148.6	-5.32533e-05	0.879096
ENSG00000125149.10	-0.00777595	0.750172
ENSG00000125249.6	0.00825751	0.469741
ENSG00000125257.12	0.00100347	0.95639
ENSG00000125266.6	0.00292554	0.488195
ENSG00000125319.13	-0.0253381	0.49291
ENSG00000125347.12	0.00139607	0.390204
ENSG00000125351.9	-0.0352772	0.239564
ENSG00000125378.14	0.00761146	0.0677518
ENSG00000125414.17	0.000809615	0.00174349
ENSG00000125434.9	-0.0702257	0.502081
ENSG00000125449.5	-0.0793347	0.062245
ENSG00000125498.18	0.487628	0.685668
ENSG00000125503.11	0.00179871	0.882496
ENSG00000125520.12	-0.00232337	0.696433
ENSG00000125611.14	-0.0244405	0.346323
ENSG00000125630.14	-0.0104142	0.523383
ENSG00000125637.14	-0.0111733	0.148824
ENSG00000125648.13	-0.00271125	0.713495
ENSG00000125650.4	-0.134614	0.425026
ENSG00000125691.11	5.97931e-05	0.938983
ENSG00000125730.15	0.00143364	0.0557408
ENSG00000125735.9	0.129584	0.236568
ENSG00000125741.4	-0.0240436	0.291534
ENSG00000125744.10	0.0538267	0.010048
ENSG00000125746.13	-0.0152312	0.0830875
ENSG00000125753.12	-0.00368798	0.566785
ENSG00000125787.10	0.486554	0.881413
ENSG00000125798.13	0.0410749	0.0707202
ENSG00000125810.9	0.00453221	0.234197
ENSG00000125820.5	-0.0262413	0.798085
ENSG00000125821.10	0.000324643	0.974838
ENSG00000125826.18	0.00240164	0.557497
ENSG00000125835.16	0.000598036	0.661716
ENSG00000125841.11	0.00487755	0.724056
ENSG00000125843.9	-0.0120259	0.697164
ENSG00000125901.5	-0.00387499	0.709213
ENSG00000125910.5	0.018872	0.726117
ENSG00000125912.9	-7.05511e-05	0.982633
ENSG00000125952.17	-0.0107596	0.294287
ENSG00000125966.9	0.0776333	0.700974
ENSG00000125971.15	-0.00322488	0.442125
ENSG00000125998.7	-0.00486391	0.125967
ENSG00000126005.14	-0.0159393	0.186878
ENSG00000126012.10	-0.000496146	0.892391
ENSG00000126062.3	0.00733537	0.582087
ENSG00000126091.18	-0.0243601	0.445956
ENSG00000126217.19	-0.00274459	0.818771
ENSG00000126218.10	-0.0567841	0.803711
ENSG00000126231.12	-0.303423	0.863364
ENSG00000126233.1	0.000581874	0.720048
ENSG00000126243.7	-0.0442935	0.176828
ENSG00000126246.8	0.187387	0.0595361
ENSG00000126254.10	-0.00624942	0.350456
ENSG00000126267.7	-0.0036402	0.268854
ENSG00000126337.12	-0.140861	0.609195
ENSG00000126391.12	-0.00362908	0.410555
ENSG00000126458.3	-0.00150786	0.79788
ENSG00000126467.9	-0.0724295	0.307352
ENSG00000126550.7	-1.73792	0.527484
ENSG00000126562.15	-0.0809127	0.523402
ENSG00000126583.9	0.314711	0.03434
ENSG00000126602.9	-0.00941039	0.277354
ENSG00000126653.14	0.00541467	0.860109
ENSG00000126698.9	-0.00263304	0.769675
ENSG00000126705.12	-0.0101278	0.195053
ENSG00000126709.13	-5.18502e-05	0.884082
ENSG00000126746.16	-0.0223945	0.387079
ENSG00000126752.7	-0.153224	0.657916
ENSG00000126759.11	0.235091	0.00438704
ENSG00000126767.16	0.00996402	0.508272
ENSG00000126775.8	-0.0364776	0.232682
ENSG00000126787.11	-0.00924952	0.391385
ENSG00000126860.10	0.047618	0.137689
ENSG00000126861.4	0.675228	0.282029
ENSG00000126878.11	-0.00525339	0.505565
ENSG00000126883.15	-0.00611331	0.445183
ENSG00000126903.14	-0.01927	0.0892743
ENSG00000126950.7	-0.315088	0.341673
ENSG00000126953.5	-0.029307	0.497131
ENSG00000127022.13	0.00102415	0.380182
ENSG00000127080.8	-0.001484	0.908346
ENSG00000127081.12	-0.00302636	0.975163
ENSG00000127083.7	-0.010655	0.716025
ENSG00000127191.16	-0.00339619	0.626366
ENSG00000127241.15	-0.024047	0.162044
ENSG00000127311.8	0.0498875	0.226282
ENSG00000127324.7	-0.0216305	0.797386
ENSG00000127337.5	0.000492437	0.912435
ENSG00000127364.3	0.0260881	0.983935
ENSG00000127366.5	0.711857	0.504631
ENSG00000127412.5	0.173337	0.905548
ENSG00000127511.8	-0.00898686	0.418269
ENSG00000127527.12	-0.0397036	0.0427773
ENSG00000127533.3	-0.0510795	0.501787
ENSG00000127540.10	0.00226756	0.697346
ENSG00000127578.6	-0.853318	0.0773316
ENSG00000127580.14	-0.07457	0.0873184
ENSG00000127585.10	-0.0414692	0.182982
ENSG00000127603.22	-0.0010605	0.333895
ENSG00000127666.9	0.00331828	0.721897
ENSG00000127804.11	-0.0327589	0.140743
ENSG00000127884.4	-0.00462109	0.3621
ENSG00000127920.5	0.0184598	0.191118
ENSG00000127928.11	-0.114075	0.524526
ENSG00000127946.15	-0.00819446	0.433291
ENSG00000127957.15	-0.297465	0.365454
ENSG00000128000.14	-0.0670184	0.426907
ENSG00000128016.5	0.000519638	0.479505
ENSG00000128159.10	-0.0112779	0.566323
ENSG00000128191.12	-0.0438314	0.0443742
ENSG00000128218.7	0.0077128	0.97681
ENSG00000128228.4	-0.00588811	0.559679
ENSG00000128242.11	-0.0601237	0.780378
ENSG00000128245.13	0.00202342	0.572183
ENSG00000128250.5	0.131278	0.93304
ENSG00000128253.12	0.3966	0.701408
ENSG00000128268.11	0.000774124	0.873635
ENSG00000128272.13	0.000940331	0.626218
ENSG00000128283.6	-0.0068283	0.110133
ENSG00000128294.14	-0.00319662	0.749105
ENSG00000128310.2	-1.00028	0.742029
ENSG00000128340.13	0.000666543	0.864225
ENSG00000128394.15	-0.0216699	0.611364
ENSG00000128422.14	-2.63106e-05	0.2794
ENSG00000128482.14	-0.865808	0.129804
ENSG00000128510.9	-0.00117429	0.718502
ENSG00000128563.12	-0.0294895	0.265404
ENSG00000128564.6	0.000296751	0.998307
ENSG00000128567.15	-1.04514e-05	0.997194
ENSG00000128578.8	-0.00838903	0.740287
ENSG00000128591.14	0.00373038	0.000375182
ENSG00000128595.15	0.000327305	0.819336
ENSG00000128596.15	-0.0246051	0.869263
ENSG00000128607.12	0.00185732	0.916985
ENSG00000128609.13	0.0104012	0.456077
ENSG00000128610.10	-1.29844	0.170616
ENSG00000128655.15	0.203729	0.323758
ENSG00000128709.11	-0.0456657	0.356154
ENSG00000128710.5	-0.00859899	0.715303
ENSG00000128713.12	-0.0347462	0.412192
ENSG00000128714.5	-0.0215441	0.554161
ENSG00000128739.19	-0.000946836	0.949567
ENSG00000128805.13	0.00786117	0.691809
ENSG00000128815.16	0.0115273	0.370697
ENSG00000128849.10	-0.0330789	0.272354
ENSG00000128881.15	-0.0164149	0.693704
ENSG00000128928.7	-0.0149007	0.287722
ENSG00000128944.12	-0.00584903	0.794301
ENSG00000129103.16	0.00100995	0.493774
ENSG00000129158.9	0.0209257	0.561157
ENSG00000129167.8	0.572781	0.265806
ENSG00000129187.13	-0.0153792	0.115173
ENSG00000129204.15	-0.408486	0.284054
ENSG00000129226.12	0.0259611	0.810338
ENSG00000129295.7	-0.0343957	0.849261
ENSG00000129315.8	-0.01739	0.374046
ENSG00000129347.18	-0.0303064	0.0228513
ENSG00000129354.10	-0.00581487	0.516823
ENSG00000129355.6	-0.00792281	0.766796
ENSG00000129450.7	0.215499	0.0154326
ENSG00000129451.10	1.75787e-05	0.95498
ENSG00000129460.14	-0.0182557	0.382795
ENSG00000129480.11	-0.00169002	0.933557
ENSG00000129636.11	0.00800897	0.583368
ENSG00000129646.12	-0.0378973	0.66768
ENSG00000129691.14	-0.00947626	0.246714
ENSG00000129744.2	0.967601	0.044759
ENSG00000129749.3	0.520927	0.124884
ENSG00000129757.11	0.00212808	0.859947
ENSG00000129910.6	0.107089	0.0391453
ENSG00000129911.7	-0.0148443	0.328215
ENSG00000129946.9	-0.0127963	0.640738
ENSG00000129988.5	0.146716	0.00677287
ENSG00000129991.11	-0.287883	0.0866792
ENSG00000129993.13	-0.0222371	0.554553
ENSG00000130005.10	-0.00481477	0.736205
ENSG00000130158.12	-0.00898144	0.308959
ENSG00000130177.13	-0.00354416	0.781461
ENSG00000130201.6	-0.143985	0.162647
ENSG00000130203.8	0.00114452	0.278204
ENSG00000130208.8	0.00553554	0.282079
ENSG00000130255.11	-0.000392282	0.595513
ENSG00000130270.15	0.00460418	0.94113
ENSG00000130287.12	-4.37293	0.12772
ENSG00000130307.10	0.13604	0.498865
ENSG00000130309.9	-0.000786942	0.784028
ENSG00000130312.5	-0.016266	0.36785
ENSG00000130368.5	-3.92326	0.250026
ENSG00000130377.12	-8.20111	0.033332
ENSG00000130402.10	-0.000975137	0.300904
ENSG00000130414.10	-0.000981242	0.901554
ENSG00000130427.2	-0.146383	0.586925
ENSG00000130433.6	0.226909	0.000364805
ENSG00000130475.13	-0.0472104	0.28869
ENSG00000130489.11	-0.0140924	0.0961269
ENSG00000130508.9	0.0010291	0.434533
ENSG00000130511.14	0.000112602	0.991814
ENSG00000130513.6	-0.00667854	0.542239
ENSG00000130517.12	-0.00490051	0.84085
ENSG00000130518.15	-0.104782	0.372479
ENSG00000130545.14	-0.0125203	0.562169
ENSG00000130561.15	-7.33764	0.2167
ENSG00000130595.15	0.0024326	0.000124845
ENSG00000130598.14	0.00460981	4.77776e-05
ENSG00000130600.14	-0.000721403	0.420044
ENSG00000130640.12	-0.0050522	0.588299
ENSG00000130643.7	-0.372276	0.730543
ENSG00000130684.12	0.0177905	0.934225
ENSG00000130695.12	-0.0051713	0.784905
ENSG00000130702.12	-0.00352858	0.100772
ENSG00000130703.14	-0.0155592	0.112349
ENSG00000130706.11	-0.00303399	0.440836
ENSG00000130713.14	0.00271198	0.88049
ENSG00000130714.14	-0.0116121	0.659664
ENSG00000130717.11	-0.0070212	0.668467
ENSG00000130720.11	-0.00879726	0.543429
ENSG00000130723.16	-0.00199751	0.37461
ENSG00000130762.13	-0.0161761	0.136861
ENSG00000130779.18	-0.00151784	0.456646
ENSG00000130783.12	1.95919	0.157252
ENSG00000130787.12	-0.0120695	0.106625
ENSG00000130812.9	0.212979	0.816937
ENSG00000130827.6	-0.009965	0.336151
ENSG00000130830.13	0.0359071	0.0436552
ENSG00000130844.15	-0.0133132	0.676539
ENSG00000130881.12	-0.0107643	0.538796
ENSG00000130943.6	-0.866361	0.161326
ENSG00000130950.12	-5.32471	0.229533
ENSG00000130957.4	0.104649	0.028955
ENSG00000130958.10	0.0347532	0.113569
ENSG00000130985.15	-0.000943645	0.558373
ENSG00000130997.15	0.193259	0.224872
ENSG00000131015.4	-0.0087502	0.622808
ENSG00000131043.10	-0.0148601	0.285002
ENSG00000131050.9	-0.192583	0.764491
ENSG00000131116.10	-0.0147383	0.457369
ENSG00000131127.12	0.0669962	0.542521
ENSG00000131153.7	0.00234954	0.874429
ENSG00000131174.4	-0.000165162	0.970756
ENSG00000131183.9	-0.0353055	0.939263
ENSG00000131187.8	-0.0221491	0.230578
ENSG00000131188.10	-0.0363451	0.584131
ENSG00000131203.11	-0.000577959	0.706431
ENSG00000131263.11	-0.0109567	0.307704
ENSG00000131368.6	-0.00228594	0.854885
ENSG00000131379.8	-1.68114	0.450988
ENSG00000131381.11	0.0014797	0.94982
ENSG00000131389.15	0.00658075	0.210922
ENSG00000131398.12	-0.114419	0.264393
ENSG00000131408.12	-0.00452457	0.574778
ENSG00000131409.11	-0.0791586	0.653821
ENSG00000131446.14	0.00179525	0.346424
ENSG00000131459.11	-0.00410634	0.679233
ENSG00000131469.11	-0.000137754	0.858141
ENSG00000131471.5	0.0639652	0.0189083
ENSG00000131475.5	1.64695e-05	0.99896
ENSG00000131584.17	-0.0112744	0.210187
ENSG00000131591.16	-0.0404733	0.321116
ENSG00000131738.8	-0.407137	0.392659
ENSG00000131747.13	-0.00125266	0.609428
ENSG00000131748.14	-0.00393192	0.784246
ENSG00000131759.16	-0.00154358	0.927968
ENSG00000131771.12	-0.019823	0.47404
ENSG00000131788.14	0.00113236	0.889683
ENSG00000131885.15	-0.0449838	0.659043
ENSG00000131966.12	-0.000290251	0.973921
ENSG00000131969.13	0.0222771	0.0924378
ENSG00000132004.11	2.45124e-05	0.999403
ENSG00000132010.14	1.81536	0.0818609
ENSG00000132155.10	-0.00386307	0.685865
ENSG00000132185.15	-0.0413109	0.563425
ENSG00000132196.12	-0.00182153	0.978933
ENSG00000132205.9	0.0146398	0.00336701
ENSG00000132326.10	-0.000694226	0.937333
ENSG00000132356.10	0.0113986	0.277332
ENSG00000132382.13	-0.00935399	0.17492
ENSG00000132386.9	0.00350979	0.0455188
ENSG00000132388.11	-0.00987447	0.182342
ENSG00000132405.17	-0.00194115	0.856322
ENSG00000132406.10	0.069415	0.150637
ENSG00000132464.10	2.00791	0.0139567
ENSG00000132467.3	0.0149761	0.475968
ENSG00000132510.9	-0.00705835	0.450203
ENSG00000132535.17	-0.0130052	0.716559
ENSG00000132554.18	-0.462995	0.624117
ENSG00000132561.12	0.00283871	0.473688
ENSG00000132563.14	0.0211772	0.702612
ENSG00000132570.13	-0.0211664	0.768966
ENSG00000132604.9	-0.0559363	0.0991387
ENSG00000132612.15	-0.00792643	0.439227
ENSG00000132613.13	-0.00574287	0.786928
ENSG00000132670.19	0.000638467	0.940364
ENSG00000132676.14	-0.00329886	0.70711
ENSG00000132677.11	0.12019	0.593334
ENSG00000132680.9	-0.0112694	0.536022
ENSG00000132681.15	1.01031	0.0166225
ENSG00000132688.10	0.00868703	0.000739742
ENSG00000132693.11	-0.0667562	0.761558
ENSG00000132698.12	-0.0016659	0.440507
ENSG00000132744.6	0.0377788	0.742577
ENSG00000132746.13	-0.00033744	0.795122
ENSG00000132749.9	-0.0583424	0.36021
ENSG00000132768.12	-0.0172668	0.351214
ENSG00000132793.10	-0.00392769	0.813459
ENSG00000132832.8	0.246949	0.153019
ENSG00000132855.4	0.761748	0.790374
ENSG00000132881.10	-0.383379	0.0493156
ENSG00000132912.11	0.00250694	0.750292
ENSG00000132953.15	0.0212584	0.295652
ENSG00000133048.11	0.0030855	0.154669
ENSG00000133055.7	0.00717844	0.000250838
ENSG00000133067.16	0.0113334	0.292653
ENSG00000133103.15	0.0274234	0.348288
ENSG00000133104.11	-0.0127967	0.359861
ENSG00000133121.19	0.011565	0.480372
ENSG00000133135.12	0.00254304	0.841692
ENSG00000133138.18	-0.000585807	0.990596
ENSG00000133142.16	0.00334813	0.596596
ENSG00000133169.5	-0.0623436	0.721765
ENSG00000133193.11	-0.00561929	0.867526
ENSG00000133195.10	-0.0064082	0.684
ENSG00000133243.7	-0.00291825	0.617433
ENSG00000133246.10	0.249428	0.0535497
ENSG00000133250.12	-0.100586	0.113047
ENSG00000133265.9	-0.00787637	0.379844
ENSG00000133275.14	-0.000258604	0.973113
ENSG00000133392.15	0.00179926	0.675551
ENSG00000133393.11	0.0116039	0.44243
ENSG00000133422.11	-0.0302941	0.0191077
ENSG00000133466.12	0.00112564	0.852047
ENSG00000133488.13	-0.0604948	0.702424
ENSG00000133519.11	3.08697e-05	0.99976
ENSG00000133612.17	-0.00322427	0.520734
ENSG00000133624.12	0.00767625	0.90994
ENSG00000133627.16	0.00470578	0.954835
ENSG00000133657.13	-0.00316855	0.332004
ENSG00000133687.14	-0.00951082	0.351109
ENSG00000133706.16	0.00227995	0.770049
ENSG00000133789.13	0.00515442	0.407509
ENSG00000133816.12	0.00306758	0.293652
ENSG00000133818.11	0.00414865	0.662238
ENSG00000133835.13	0.0036151	0.658977
ENSG00000133884.8	-0.00557204	0.652274
ENSG00000133961.18	-0.00683646	0.39596
ENSG00000133962.6	-0.0645373	0.704926
ENSG00000133983.13	-0.0221435	0.413824
ENSG00000134049.4	0.00190229	0.876611
ENSG00000134056.10	0.0641846	0.0583444
ENSG00000134057.13	0.00352574	0.390657
ENSG00000134058.9	0.0251373	0.127191
ENSG00000134070.4	-0.0144975	0.415351
ENSG00000134138.18	-0.00927409	0.824071
ENSG00000134160.12	-0.0269812	0.95199
ENSG00000134184.11	-0.0127338	0.19555
ENSG00000134201.9	-0.156752	0.55946
ENSG00000134202.9	0.00162625	0.495564
ENSG00000134222.15	-0.0320805	0.388991
ENSG00000134242.14	0.0350978	0.412529
ENSG00000134243.10	-0.00151379	0.742193
ENSG00000134245.16	-0.0126149	0.337129
ENSG00000134285.9	0.00750188	0.378552
ENSG00000134287.8	-0.00323467	0.313922
ENSG00000134313.13	-0.00284436	0.687792
ENSG00000134318.12	0.00493053	0.648614
ENSG00000134323.10	-0.0630962	0.517004
ENSG00000134330.17	0.0201092	0.267438
ENSG00000134333.12	2.9281e-05	0.908517
ENSG00000134339.7	0.014754	0.06234
ENSG00000134375.9	0.00730732	0.49155
ENSG00000134398.11	0.00267982	0.941931
ENSG00000134419.14	-0.000798669	0.489829
ENSG00000134438.9	-6.23152	0.309994
ENSG00000134460.14	0.0513046	0.0602794
ENSG00000134480.12	0.0581352	0.0234599
ENSG00000134489.6	5.58361	0.00861566
ENSG00000134539.15	0.00682535	0.883532
ENSG00000134545.12	0.0699718	0.593935
ENSG00000134571.9	0.460654	0.491129
ENSG00000134612.10	-3.74208	0.226697
ENSG00000134686.15	0.00144222	0.749704
ENSG00000134762.15	-0.000238076	0.545344
ENSG00000134780.8	-0.0892417	0.312614
ENSG00000134815.17	-0.0805111	0.0101341
ENSG00000134827.6	-0.0185321	0.109103
ENSG00000134830.5	0.00831772	0.504469
ENSG00000134853.10	0.00270563	0.629576
ENSG00000134884.12	0.00563561	0.47654
ENSG00000134899.16	0.00579453	0.822001
ENSG00000134962.6	-0.519362	0.34182
ENSG00000135040.14	0.0183718	0.478647
ENSG00000135047.13	0.0013516	0.438355
ENSG00000135070.12	0.0344716	0.0630036
ENSG00000135083.13	0.0131314	0.434093
ENSG00000135093.11	-0.0720789	0.352497
ENSG00000135114.11	0.00217858	0.351211
ENSG00000135144.6	0.00101508	0.984952
ENSG00000135245.9	-0.00371007	0.56822
ENSG00000135248.14	-0.195741	0.644841
ENSG00000135249.6	0.00791183	0.793372
ENSG00000135250.15	-0.00371473	0.575951
ENSG00000135253.12	-0.0191921	0.582461
ENSG00000135317.11	0.0148544	0.398202
ENSG00000135324.5	0.00419579	0.85687
ENSG00000135372.7	0.00405867	0.573751
ENSG00000135387.18	0.000778685	0.731383
ENSG00000135390.16	-0.00199906	0.526174
ENSG00000135392.14	-0.0109508	0.692601
ENSG00000135407.9	-0.0563427	0.592642
ENSG00000135409.9	-0.244897	0.805922
ENSG00000135436.7	-1.64451	0.186223
ENSG00000135439.10	0.0373738	0.411516
ENSG00000135452.8	0.00686846	0.647721
ENSG00000135457.8	0.00176787	0.924112
ENSG00000135476.10	-0.012682	0.420208
ENSG00000135477.10	0.0413017	0.389262
ENSG00000135482.5	0.0405855	0.59632
ENSG00000135503.11	-0.0109693	0.370991
ENSG00000135506.14	1.26459e-05	0.994045
ENSG00000135537.15	0.243995	0.178273
ENSG00000135596.16	0.0112212	0.326181
ENSG00000135605.11	0.0520595	0.54915
ENSG00000135625.7	0.161932	0.171597
ENSG00000135632.10	-0.0155217	0.434956
ENSG00000135740.15	0.00839018	0.961758
ENSG00000135747.10	-2.21482	0.226065
ENSG00000135821.15	-0.000310978	0.556366
ENSG00000135828.10	-0.0192144	0.542108
ENSG00000135829.15	-0.00110532	0.780154
ENSG00000135835.9	-0.0540051	0.50707
ENSG00000135838.12	0.00131003	0.927029
ENSG00000135902.8	0.0663337	1.03912e-05
ENSG00000135916.14	-0.00163742	0.65592
ENSG00000135919.11	-0.000720625	0.543192
ENSG00000135924.14	-0.0014057	0.583585
ENSG00000135925.7	-0.00118314	0.868347
ENSG00000135929.7	0.00313836	0.412665
ENSG00000136040.7	0.0156074	0.0155543
ENSG00000136045.10	-0.00427523	0.660793
ENSG00000136059.13	-0.00913572	0.81986
ENSG00000136098.15	0.0995797	0.1116
ENSG00000136100.11	0.0138387	0.239147
ENSG00000136114.14	-0.00244437	0.807447
ENSG00000136147.15	0.018521	0.315397
ENSG00000136193.15	-0.0026293	0.567871
ENSG00000136197.11	-0.216922	0.821418
ENSG00000136238.16	0.000610634	0.665521
ENSG00000136240.8	-0.00130599	0.509444
ENSG00000136243.15	-0.0018149	0.961557
ENSG00000136250.10	0.0611708	0.00242607
ENSG00000136271.9	-0.00538913	0.397259
ENSG00000136273.10	-0.00878615	0.67949
ENSG00000136279.17	-0.000118434	0.9538
ENSG00000136286.13	0.000731814	0.938049
ENSG00000136327.6	0.0442483	0.845223
ENSG00000136352.16	-0.113637	0.609209
ENSG00000136381.11	-0.00732432	0.542489
ENSG00000136404.14	0.36004	0.00369926
ENSG00000136444.8	0.00689916	0.792116
ENSG00000136463.7	-0.0158223	0.504179
ENSG00000136485.13	-0.00710604	0.260786
ENSG00000136492.7	-0.0162029	0.516607
ENSG00000136535.13	0.434333	0.185148
ENSG00000136560.12	0.0167288	0.485241
ENSG00000136574.16	-0.0518646	0.570965
ENSG00000136603.12	-0.00199086	0.69997
ENSG00000136628.16	0.00141718	0.776253
ENSG00000136631.11	0.0142736	0.372094
ENSG00000136682.13	0.0817868	0.22728
ENSG00000136688.9	-0.00149459	0.630675
ENSG00000136694.8	-0.00245811	0.779281
ENSG00000136695.13	-0.00183457	0.241309
ENSG00000136697.11	-0.0707711	0.405593
ENSG00000136731.11	-0.00124077	0.82963
ENSG00000136783.9	0.022362	0.291374
ENSG00000136807.10	-0.000667546	0.940464
ENSG00000136811.15	-0.00279809	0.82851
ENSG00000136819.13	0.0136137	0.225787
ENSG00000136826.13	0.00132334	0.397493
ENSG00000136827.11	0.0114819	0.476195
ENSG00000136828.17	-0.00858316	0.778411
ENSG00000136840.17	0.00892594	0.682717
ENSG00000136842.12	0.039945	0.00020287
ENSG00000136856.16	-0.0229254	0.385755
ENSG00000136877.13	0.000598259	0.913247
ENSG00000136881.10	2.75185	0.107409
ENSG00000136883.11	0.0117174	0.869703
ENSG00000136895.17	-0.191116	0.112498
ENSG00000136908.16	-0.00244978	0.769162
ENSG00000136928.4	-0.0877758	0.796162
ENSG00000136931.8	-0.0209548	0.271589
ENSG00000136932.12	-0.00264914	0.963436
ENSG00000136982.5	0.0199168	0.521406
ENSG00000137038.7	0.0104361	0.268501
ENSG00000137054.14	-0.0049377	0.733171
ENSG00000137078.7	0.10199	0.0993302
ENSG00000137090.10	0.108866	0.452676
ENSG00000137098.12	-0.0151403	0.979167
ENSG00000137100.14	-0.00543094	0.496826
ENSG00000137135.16	-0.0636572	0.147402
ENSG00000137145.19	0.00235076	0.764821
ENSG00000137154.11	-4.08072e-05	0.864356
ENSG00000137161.15	-0.00682726	0.340332
ENSG00000137171.13	-0.0168149	0.444798
ENSG00000137203.9	-0.00381162	0.395044
ENSG00000137207.10	-0.00444002	0.443882
ENSG00000137218.9	-0.0904696	0.325281
ENSG00000137221.13	-0.0213637	0.220122
ENSG00000137270.10	-1.60381	0.610694
ENSG00000137274.11	-0.0203925	0.727814
ENSG00000137275.12	-0.0256094	0.127497
ENSG00000137288.8	-0.0176284	0.247639
ENSG00000137331.11	0.00116547	0.436215
ENSG00000137337.13	-0.0130531	0.339593
ENSG00000137338.5	-0.0407313	0.601649
ENSG00000137343.16	-0.0859115	0.267052
ENSG00000137404.13	-0.0216167	0.223018
[truncated: 5,886 more rows]

## Sheet: CG.DFI.KIRC
Gene	Coefficient	Logrank p-value
ENSG00000000460.15	-0.0278597	0.880535
ENSG00000000938.11	-0.0309267	0.328581
ENSG00000001167.13	-0.00353311	0.919745
ENSG00000001617.10	0.00255038	0.560902
ENSG00000002834.16	0.00594344	0.0182038
ENSG00000003096.12	0.00835291	0.699358
ENSG00000003393.13	0.0277456	0.302774
ENSG00000003400.13	0.0161034	0.510901
ENSG00000003402.18	0.00132109	0.677712
ENSG00000003989.15	-0.0006601	0.778411
ENSG00000004660.13	-0.0242958	0.546343
ENSG00000004779.8	-0.00395133	0.623934
ENSG00000004809.12	0.0759786	0.599601
ENSG00000004838.12	-0.00827253	0.849382
ENSG00000004975.10	0.0730401	0.0432833
ENSG00000005059.14	-0.0120929	0.723262
ENSG00000005075.14	-0.0037895	0.761261
ENSG00000005187.10	0.00437046	0.755951
ENSG00000005189.18	-0.053269	0.662038
ENSG00000005249.11	-0.0507629	0.498851
ENSG00000005339.11	0.0089656	0.26596
ENSG00000005379.14	-0.0232929	0.43145
ENSG00000005486.15	-0.0023043	0.635072
ENSG00000005801.15	-0.0282975	0.4549
ENSG00000005961.16	-0.0498206	0.798846
ENSG00000005981.11	0.0405952	0.192589
ENSG00000006047.11	-0.0208927	0.753857
ENSG00000006062.12	0.00191317	0.804537
ENSG00000006071.10	-3.09375	0.132225
ENSG00000006210.6	0.000946305	0.59314
ENSG00000006282.18	0.00717758	0.336443
ENSG00000006283.16	-0.698468	0.610135
ENSG00000006327.12	-0.00340785	0.356475
ENSG00000006534.14	-0.000457632	0.955699
ENSG00000006607.12	-0.00314269	0.922144
ENSG00000006704.9	0.0203014	0.459863
ENSG00000006744.17	0.0102911	0.322213
ENSG00000006756.14	0.00467425	0.235984
ENSG00000006757.10	-0.0107176	0.566485
ENSG00000007038.9	0.498495	0.00160784
ENSG00000007047.13	0.0315473	0.187378
ENSG00000007080.9	0.00241027	0.82177
ENSG00000007168.11	-0.000283182	0.965058
ENSG00000007216.13	0.0138745	0.860638
ENSG00000007237.17	-0.0115661	0.608546
ENSG00000007264.12	0.0300983	0.0326572
ENSG00000007312.11	-0.0543435	0.429667
ENSG00000007314.10	-0.0272767	0.416611
ENSG00000007341.17	-0.0438934	0.741142
ENSG00000007392.15	-0.0785611	0.018684
ENSG00000007402.10	-0.258706	0.328858
ENSG00000007516.12	-0.0735747	0.204243
ENSG00000007541.13	-0.00466897	0.607465
ENSG00000007933.11	-0.0242873	0.319196
ENSG00000008056.11	0.0269925	0.836971
ENSG00000008130.14	-0.0195225	0.454101
ENSG00000008283.14	0.00563617	0.497401
ENSG00000008516.15	-0.311349	0.118113
ENSG00000008517.15	0.000329849	0.708416
ENSG00000008853.15	0.00587238	0.657666
ENSG00000009724.15	-0.585851	0.120734
ENSG00000010256.9	-0.00178916	0.462111
ENSG00000010319.5	0.00278091	0.76403
ENSG00000010322.14	-0.0102939	0.445938
ENSG00000010327.9	-0.000295542	0.919842
ENSG00000010379.14	0.00226489	0.0656884
ENSG00000010539.10	-0.106444	0.432191
ENSG00000010610.8	0.00296422	0.474543
ENSG00000010626.13	0.0188936	0.316707
ENSG00000010704.17	0.0494633	0.0154577
ENSG00000011083.7	-8.22575	0.212392
ENSG00000011143.15	0.030939	0.558478
ENSG00000011304.15	0.00194192	0.611941
ENSG00000011376.8	-0.013206	0.503249
ENSG00000011422.10	0.010365	0.346909
ENSG00000011451.16	0.0220408	0.188127
ENSG00000011485.13	0.0013317	0.941919
ENSG00000011523.12	0.0183713	0.196746
ENSG00000012061.14	0.00252475	0.850372
ENSG00000012124.13	-0.231954	0.115766
ENSG00000012211.11	0.0710787	0.323914
ENSG00000012504.12	0.0151225	0.0420258
ENSG00000012817.14	0.00771522	0.521696
ENSG00000012983.10	-0.00057039	0.975672
ENSG00000013275.6	0.00469159	0.66728
ENSG00000013306.14	-0.00247479	0.485474
ENSG00000013441.14	-0.0074944	0.299888
ENSG00000013561.16	0.00726437	0.192532
ENSG00000013588.5	0.0011718	0.559377
ENSG00000014138.7	-0.0322882	0.650673
ENSG00000014216.14	0.00267345	0.331184
ENSG00000014824.12	-0.00137959	0.768078
ENSG00000015285.9	0.00614081	0.784601
ENSG00000015520.13	0.0964674	0.00646393
ENSG00000015676.16	0.0160395	0.0716376
ENSG00000016402.11	-0.869446	0.263379
ENSG00000016864.15	-0.0057624	0.764953
ENSG00000017483.13	-0.00324265	0.823911
ENSG00000018280.15	0.0132689	0.616893
ENSG00000018408.13	0.00114437	0.548024
ENSG00000018625.13	0.0778213	0.0023297
ENSG00000018699.10	0.0854005	0.025279
ENSG00000019102.10	-0.365216	0.213274
ENSG00000019505.6	0.000215577	0.902105
ENSG00000019995.6	0.0281425	0.497867
ENSG00000020181.16	0.00730371	0.178657
ENSG00000020426.9	-0.020146	0.703247
ENSG00000020633.17	-0.0102804	0.490686
ENSG00000021300.12	-0.0134978	0.578381
ENSG00000021461.15	-2.49368	0.297927
ENSG00000021488.11	0.0190892	0.061429
ENSG00000021762.18	0.0248573	0.261706
ENSG00000021776.9	-0.00312991	0.827608
ENSG00000022277.11	0.0199118	0.0464307
ENSG00000022556.14	-0.0453965	0.462759
ENSG00000023330.13	-0.00972288	0.417336
ENSG00000023445.12	0.000857328	0.588445
ENSG00000023572.7	-0.00298864	0.97376
ENSG00000023608.4	-0.0396619	0.45569
ENSG00000023892.10	-0.0313926	0.371223
ENSG00000023902.12	-0.00152698	0.85331
ENSG00000023909.8	0.00896607	0.154419
ENSG00000024422.10	0.00269152	0.0452231
ENSG00000025039.13	-0.00236596	0.613533
ENSG00000025293.14	0.0333012	0.174074
ENSG00000025800.12	0.013008	0.356973
ENSG00000026950.15	-0.00329216	0.584815
ENSG00000027847.12	-0.00158184	0.863451
ENSG00000028277.19	-0.0216723	0.499573
ENSG00000029153.13	-0.0462195	0.490311
ENSG00000029363.14	0.00119102	0.889432
ENSG00000029534.18	0.0113211	0.4472
ENSG00000029559.6	0.0888945	0.279171
ENSG00000029993.13	0.00353935	0.862149
ENSG00000030110.11	-0.00968925	0.690008
ENSG00000031081.9	0.00293223	0.690859
ENSG00000033050.6	0.00333098	0.813107
ENSG00000033100.13	0.0154368	0.183361
ENSG00000033327.11	-0.000449503	0.954467
ENSG00000033867.15	0.00199023	0.655296
ENSG00000034510.5	0.000159068	0.441013
ENSG00000035141.6	0.0190248	0.349624
ENSG00000035862.11	0.000713169	0.576644
ENSG00000036054.11	0.00149933	0.921876
ENSG00000036448.8	-0.0133498	0.816048
ENSG00000036530.7	-0.200087	0.306776
ENSG00000037280.14	0.00335285	0.480909
ENSG00000037757.12	0.0161237	0.501713
ENSG00000037965.5	0.030517	0.454767
ENSG00000038358.13	0.0184822	0.518116
ENSG00000038532.13	-0.0127074	0.50127
ENSG00000039068.17	0.000474749	0.787622
ENSG00000040199.17	-0.0767439	0.162383
ENSG00000040633.11	0.00322064	0.898884
ENSG00000041357.14	-0.00530663	0.564959
ENSG00000041802.9	0.00880433	0.709205
ENSG00000041982.13	-0.000936635	0.57065
ENSG00000042062.10	-0.0142606	0.386063
ENSG00000042286.13	0.0216839	0.340599
ENSG00000042753.10	-0.000745768	0.852487
ENSG00000043143.19	0.0136525	0.157487
ENSG00000044090.7	0.0242255	0.163411
ENSG00000044446.10	0.0003729	0.919053
ENSG00000047457.12	1.42825e-05	0.96035
ENSG00000047597.5	0.0406648	0.742138
ENSG00000047617.13	-0.0992372	0.441376
ENSG00000047634.13	-0.0502887	0.247869
ENSG00000047849.20	0.00475111	0.0895736
ENSG00000048544.5	0.0029649	0.872019
ENSG00000049192.13	-0.142996	0.645026
ENSG00000049245.11	0.0156671	0.0405017
ENSG00000049246.13	0.0170969	0.258115
ENSG00000049656.12	0.00328601	0.177694
ENSG00000049769.11	0.0700718	0.500912
ENSG00000050405.12	-0.00317497	0.427757
ENSG00000050555.16	-0.00211769	0.831576
ENSG00000050748.16	0.0349779	0.0305042
ENSG00000050767.14	0.0032237	0.0367446
ENSG00000051382.7	0.0177681	0.0170926
ENSG00000051825.13	-0.0244208	0.553137
ENSG00000052344.14	-0.00399458	0.521909
ENSG00000053254.14	-0.00358465	0.564226
ENSG00000053438.8	-1.8959	0.0904518
ENSG00000053501.11	0.0158237	0.490147
ENSG00000053900.9	-0.0796327	0.0742221
ENSG00000054118.12	0.0178006	0.043135
ENSG00000054179.10	0.00556742	0.797089
ENSG00000054219.10	0.00168679	0.958443
ENSG00000054392.11	0.0284136	0.271977
ENSG00000054598.6	-0.00525722	0.778076
ENSG00000054938.14	-0.010843	0.655527
ENSG00000054965.9	0.0171038	0.0585966
ENSG00000054967.11	-0.0658154	0.445805
ENSG00000054983.15	0.00948516	0.317701
ENSG00000055211.11	0.00470397	0.553175
ENSG00000055483.18	-0.00871544	0.58208
ENSG00000055917.14	0.0111502	0.0637585
ENSG00000055955.14	-0.702926	0.375952
ENSG00000055957.9	0.0997537	0.587449
ENSG00000056558.9	-0.0173119	0.439248
ENSG00000056586.14	0.00226604	0.837523
ENSG00000057252.11	0.00207606	0.761703
ENSG00000057468.6	-0.837157	0.369453
ENSG00000057593.12	-3.50973	0.266527
ENSG00000058453.15	-0.0224994	0.517028
ENSG00000058600.14	-0.0233543	0.546501
ENSG00000058673.14	0.00641095	0.468052
ENSG00000058729.9	0.0469418	0.0995605
ENSG00000059145.17	-0.0845306	0.289113
ENSG00000059573.7	0.0120285	0.113877
ENSG00000059915.15	-0.000283466	0.995957
ENSG00000060140.7	-1.0189	0.337382
ENSG00000060558.3	-0.00615258	0.91915
ENSG00000060642.9	0.0403894	0.257105
ENSG00000061273.16	0.00259526	0.756185
ENSG00000062096.13	0.00418841	0.896313
ENSG00000062524.14	-0.654689	0.345563
ENSG00000062822.11	-0.0145657	0.778304
ENSG00000063015.18	-3.77921	0.256772
ENSG00000063046.16	0.00191344	0.0877602
ENSG00000063127.14	-0.0953563	0.366294
ENSG00000063241.6	0.00420011	0.19377
ENSG00000063244.11	0.00574357	0.533663
ENSG00000064012.20	0.0219963	0.185451
ENSG00000064201.14	-0.505116	0.100345
ENSG00000064218.4	-1.45833	0.459152
ENSG00000064313.10	0.0233939	0.290603
ENSG00000064545.13	0.0118643	0.548926
ENSG00000064547.12	-0.00466695	0.881748
ENSG00000064601.15	0.00130895	0.447718
ENSG00000064652.9	-0.00706062	0.762927
ENSG00000064666.13	-0.00253658	0.747814
ENSG00000064687.11	-0.131278	0.0491045
ENSG00000064886.12	-0.000965098	0.954555
ENSG00000064961.17	0.00256619	0.812861
ENSG00000064999.13	0.000110827	0.976894
ENSG00000065029.13	-0.029055	0.356922
ENSG00000065060.15	-0.015339	0.562507
ENSG00000065268.9	0.010243	0.434819
ENSG00000065328.15	-0.0711344	0.757753
ENSG00000065615.12	-0.0217831	0.520259
ENSG00000065665.19	-0.241808	0.162449
ENSG00000065717.13	-0.0187865	0.414329
ENSG00000065802.10	-0.0157095	0.544327
ENSG00000065978.16	0.00781311	0.00246529
ENSG00000066084.11	0.017143	0.206561
ENSG00000066117.13	0.028911	0.0991191
ENSG00000066279.15	0.0472727	0.202011
ENSG00000066336.10	0.00343346	0.789942
ENSG00000066379.13	-0.0312818	0.502606
ENSG00000066422.4	-0.0194914	0.5578
ENSG00000066629.15	0.00211563	0.895031
ENSG00000066651.16	-0.0674178	0.438771
ENSG00000066654.11	-0.00437958	0.786109
ENSG00000066926.9	0.023762	0.346746
ENSG00000067177.13	-0.00371717	0.748186
ENSG00000067182.6	0.00294978	0.483524
ENSG00000067191.14	-0.0542012	0.622159
ENSG00000067225.16	0.000555919	0.0351416
ENSG00000067334.12	0.012045	0.464934
ENSG00000067596.9	0.0246156	0.221215
ENSG00000067829.17	0.00536048	0.623425
ENSG00000067840.11	-0.095156	0.442354
ENSG00000067900.6	0.00456032	0.607681
ENSG00000067955.12	0.00584328	0.703975
ENSG00000067992.11	0.0718731	0.208862
ENSG00000068001.12	0.00178088	0.74493
ENSG00000068079.6	0.000975368	0.931575
ENSG00000068120.13	0.00191486	0.864032
ENSG00000068137.13	0.0350179	0.26693
ENSG00000068308.12	0.0130609	0.206194
ENSG00000068400.12	0.00452549	0.829008
ENSG00000068615.15	-0.0174416	0.819778
ENSG00000068724.14	0.001406	0.913793
ENSG00000068745.13	-0.0131667	0.570295
ENSG00000068781.19	0.0690654	0.911624
ENSG00000068831.17	-0.0404989	0.461589
ENSG00000069399.11	-0.00620746	0.558946
ENSG00000069493.13	-0.060626	0.148348
ENSG00000069712.10	0.0313741	0.690294
ENSG00000069956.10	0.00647114	0.679931
ENSG00000069966.17	0.00277143	0.891621
ENSG00000070214.14	0.00163224	0.792436
ENSG00000070404.8	-0.000584878	0.809169
ENSG00000070444.13	-0.000257638	0.994353
ENSG00000070476.13	0.0239608	0.433891
ENSG00000070601.8	0.00241993	0.987502
ENSG00000070729.12	-2.31722	0.416427
ENSG00000070731.8	0.0252914	0.432517
ENSG00000070785.15	-0.0151949	0.718733
ENSG00000070808.14	-0.116984	0.731299
ENSG00000070831.14	-0.000372555	0.922544
ENSG00000070915.8	0.00136636	0.0983234
ENSG00000070950.8	-0.000319967	0.997872
ENSG00000071127.15	3.50137e-05	0.987155
ENSG00000071564.13	0.00217663	0.903085
ENSG00000071626.15	-0.00909375	0.553451
ENSG00000071655.16	-0.00254803	0.707381
ENSG00000071859.13	-0.00277139	0.731625
ENSG00000071889.15	-0.00520632	0.661874
ENSG00000072042.11	-0.00937536	0.277522
ENSG00000072062.12	0.0117534	0.28162
ENSG00000072134.14	0.0292155	0.121681
ENSG00000072195.13	-0.01165	0.906269
ENSG00000072415.7	-0.00433726	0.714813
ENSG00000072736.17	0.0264485	0.290575
ENSG00000072818.10	-0.0791081	0.0762449
ENSG00000072832.13	0.010249	0.213063
ENSG00000072858.9	-0.171253	0.203731
ENSG00000072958.7	0.0187325	0.0569118
ENSG00000073008.13	-0.000777701	0.937557
ENSG00000073146.14	-0.713608	0.204477
ENSG00000073150.12	-0.0827379	0.656091
ENSG00000073464.10	0.0360388	0.106419
ENSG00000073670.12	0.076726	0.627897
ENSG00000073711.9	0.00489695	0.120055
ENSG00000073737.15	-0.295688	0.237516
ENSG00000073905.8	0.54278	0.492214
ENSG00000074266.16	-0.161389	0.0370906
ENSG00000074319.11	-0.00224526	0.790429
ENSG00000074370.16	-0.000556052	0.955565
ENSG00000074527.10	-0.000361379	0.914184
ENSG00000074590.12	0.0123396	0.308887
ENSG00000074660.14	0.00836375	0.569555
ENSG00000074842.6	0.00357694	0.547495
ENSG00000074966.9	-0.171143	0.266642
ENSG00000075340.21	0.027369	0.412985
ENSG00000075426.10	-0.000320796	0.858507
ENSG00000076003.4	0.0204072	0.26541
ENSG00000076043.8	0.00918246	0.338757
ENSG00000076067.10	0.0122716	0.136868
ENSG00000076108.10	0.00305701	0.613845
ENSG00000076248.9	0.0161555	0.411799
ENSG00000076258.8	0.0651329	0.0141699
ENSG00000076321.9	0.0961301	0.0122341
ENSG00000076554.14	-0.00182082	0.803472
ENSG00000076555.14	-0.0146574	0.275858
ENSG00000076650.5	0.0386299	0.59806
ENSG00000076706.13	0.00170991	0.0538841
ENSG00000076864.18	-0.00247732	0.4792
ENSG00000076928.16	-0.00393245	0.670624
ENSG00000077009.12	-0.0362696	0.604317
ENSG00000077044.8	0.00916278	0.378908
ENSG00000077147.13	0.00195646	0.428722
ENSG00000077279.15	0.0515868	0.903404
ENSG00000077454.14	-0.0972509	0.175379
ENSG00000077498.8	-3.69575	0.393419
ENSG00000077616.9	-0.19195	0.539664
ENSG00000077713.17	0.0549949	0.00369611
ENSG00000077782.18	-0.0011679	0.809797
ENSG00000078070.10	0.00622523	0.464917
ENSG00000078081.6	0.0389565	0.245647
ENSG00000078124.10	0.00166902	0.929434
ENSG00000078142.10	0.00677701	0.671651
ENSG00000078319.8	0.0382273	0.488313
ENSG00000078399.14	0.0260399	0.239913
ENSG00000078596.9	0.0128549	0.181473
ENSG00000078747.11	-0.00527311	0.634891
ENSG00000079246.14	0.00439504	0.166072
ENSG00000079277.18	-0.0406289	0.303292
ENSG00000079313.10	-0.00515645	0.818355
ENSG00000079335.16	-0.059114	0.290943
ENSG00000079337.14	-0.0192184	0.358627
ENSG00000079387.12	0.0452499	0.432777
ENSG00000079432.6	0.00657973	0.443192
ENSG00000079459.11	-0.000795357	0.925873
ENSG00000079557.4	0.14661	0.11728
ENSG00000079616.11	-0.00716655	0.739669
ENSG00000079805.15	0.00161692	0.577753
ENSG00000079950.12	0.00356121	0.562757
ENSG00000079999.12	0.0299054	0.0374614
ENSG00000080224.16	0.161822	0.0512434
ENSG00000080644.14	-3.2149	0.508441
ENSG00000080854.13	-0.267841	0.335657
ENSG00000081051.6	0.196668	0.467495
ENSG00000081148.11	-0.240918	0.728444
ENSG00000081154.10	-3.52176e-05	0.992245
ENSG00000081181.6	0.00757507	0.227935
ENSG00000081248.9	1.1012	0.270195
ENSG00000081307.11	0.00328556	0.555048
ENSG00000081692.11	0.0121201	0.681362
ENSG00000081760.15	-0.00104456	0.97173
ENSG00000081800.7	-0.00167851	0.653303
ENSG00000081803.14	0.00327262	0.777892
ENSG00000081818.3	0.0350252	0.245321
ENSG00000081853.14	0.106959	0.127717
ENSG00000082068.7	0.0155956	0.661829
ENSG00000082074.14	-0.000550305	0.945441
ENSG00000082126.16	-3.52521	0.240063
ENSG00000082153.16	-0.00431388	0.63575
ENSG00000082269.15	-0.0488716	0.0784729
ENSG00000082397.14	-0.00424515	0.561512
ENSG00000082512.13	-0.0393426	0.288927
ENSG00000082781.10	0.00771673	0.0064225
ENSG00000083099.9	-0.000964903	0.962073
ENSG00000083123.13	-0.0183789	0.420762
ENSG00000083223.16	-0.00778579	0.774237
ENSG00000083444.15	0.00105032	0.322292
ENSG00000083642.17	-0.000829742	0.963064
ENSG00000083782.6	-0.286877	0.862027
ENSG00000083807.8	-0.149505	0.318622
ENSG00000083812.10	-0.100321	0.482817
ENSG00000083838.14	0.0835307	0.437966
ENSG00000083844.9	0.00418696	0.84772
ENSG00000083845.7	-6.02049e-05	0.870247
ENSG00000083896.11	0.0118846	0.335725
ENSG00000084092.6	0.0871911	0.014796
ENSG00000084652.14	-0.00719725	0.580665
ENSG00000084693.14	0.0156298	0.013033
ENSG00000084764.9	-0.0125753	0.58413
ENSG00000085063.13	-0.000876121	0.351793
ENSG00000085117.10	-0.00306435	0.645119
ENSG00000085274.14	0.00304258	0.908392
ENSG00000085377.12	0.0306114	0.358456
ENSG00000085433.14	0.0729748	0.100955
ENSG00000085465.12	-0.0249528	0.67565
ENSG00000085552.15	0.130197	0.232275
ENSG00000085644.12	0.0616833	0.115815
ENSG00000085662.12	0.000560655	0.141428
ENSG00000085831.14	-0.00253124	0.684572
ENSG00000085832.15	0.00153625	0.888092
ENSG00000085978.20	0.00442548	0.608155
ENSG00000085998.12	0.00583419	0.265195
ENSG00000086015.19	-0.0139044	0.635149
ENSG00000086159.11	-0.358777	0.454493
ENSG00000086475.13	0.0137268	0.442701
ENSG00000086589.10	0.0435959	0.00471719
ENSG00000086619.12	0.00333617	0.867179
ENSG00000086730.15	-0.0176138	0.582903
ENSG00000086848.13	0.227024	0.0407886
ENSG00000086967.9	0.067642	0.452292
ENSG00000087008.14	0.0163089	0.699267
ENSG00000087076.7	0.00968405	0.281858
ENSG00000087077.10	0.0197204	0.0232176
ENSG00000087085.12	-0.0182885	0.698638
ENSG00000087086.12	2.29538e-05	0.841495
ENSG00000087087.17	-0.00624739	0.649455
ENSG00000087088.18	0.0104194	0.251459
ENSG00000087111.19	0.0110059	0.0368161
ENSG00000087152.14	0.0024121	0.907896
ENSG00000087191.11	-2.02302e-05	0.995556
ENSG00000087237.9	-0.0317123	0.409626
ENSG00000087245.11	0.000780681	0.73892
ENSG00000087253.10	-0.00887804	0.479962
ENSG00000087266.14	0.000592837	0.872066
ENSG00000087274.15	0.0090623	0.0338691
ENSG00000087338.4	0.0267757	0.034221
ENSG00000087502.16	0.00150396	0.928825
ENSG00000087589.15	0.0481677	0.42419
ENSG00000087995.14	-0.0117972	0.837503
ENSG00000088002.10	-0.241724	0.435296
ENSG00000088205.11	0.00959205	0.321794
ENSG00000088247.14	0.0180931	0.0276206
ENSG00000088256.7	-0.00423889	0.486331
ENSG00000088280.17	-0.00808063	0.695397
ENSG00000088367.19	0.00358007	0.310658
ENSG00000088538.12	-0.506066	0.244871
ENSG00000088826.16	-0.000741313	0.964389
ENSG00000088827.11	0.00226502	0.877608
ENSG00000088899.13	-0.0262933	0.248448
ENSG00000088926.12	-0.16068	0.390223
ENSG00000089012.13	-0.0125598	0.811325
ENSG00000089041.15	-0.00950476	0.736186
ENSG00000089057.13	0.00852486	0.506064
ENSG00000089063.13	-0.0015672	0.649195
ENSG00000089101.16	-0.319118	0.547029
ENSG00000089127.11	0.00556463	0.346775
ENSG00000089169.13	-0.333345	0.596134
ENSG00000089280.17	0.00551395	0.1761
ENSG00000089351.13	0.0126418	0.114925
ENSG00000089558.7	-0.200039	0.681749
ENSG00000089597.15	0.00464315	0.00719589
ENSG00000089639.9	-0.0050217	0.841455
ENSG00000089685.13	-0.00401075	0.894405
ENSG00000089692.7	-0.00272703	0.86347
ENSG00000089775.10	-0.0574916	0.222419
ENSG00000090006.16	-0.000692508	0.896177
ENSG00000090097.19	-0.0747477	0.234864
ENSG00000090263.14	0.00163304	0.868629
ENSG00000090316.14	-0.018396	0.253963
ENSG00000090382.5	0.000429014	0.782544
ENSG00000090447.10	0.0864935	0.145802
ENSG00000090470.13	-0.00319558	0.959449
ENSG00000090512.10	2.06029	0.00146899
ENSG00000090554.11	-0.396044	0.145547
ENSG00000090615.11	-0.0142362	0.280419
ENSG00000090621.12	0.0131184	0.000684191
ENSG00000090659.16	-0.017911	0.71278
ENSG00000090674.14	0.0233718	0.39836
ENSG00000090686.14	0.00476786	0.824293
ENSG00000090863.10	0.00160384	0.303108
ENSG00000090924.13	0.00150056	0.88621
ENSG00000090932.9	-0.82712	0.616332
ENSG00000090975.11	0.0147362	0.633943
ENSG00000091039.15	-0.0017135	0.779934
ENSG00000091073.18	0.00132461	0.97738
ENSG00000091106.17	-0.038242	0.715258
ENSG00000091317.7	-0.00785372	0.440051
ENSG00000091490.9	0.00540969	0.0219124
ENSG00000091513.13	-0.00668337	0.629028
ENSG00000091536.15	-0.00830856	0.938391
ENSG00000091542.8	0.0142704	0.0434842
ENSG00000091844.6	-0.471538	0.195204
ENSG00000091947.8	-0.00663606	0.439119
ENSG00000092010.13	0.00200936	0.579288
ENSG00000092054.12	-7.26277	0.361857
ENSG00000092067.5	-0.78764	0.802218
ENSG00000092068.17	-0.000105195	0.986297
ENSG00000092096.13	0.00742683	0.4964
ENSG00000092108.19	-0.0207722	0.278638
ENSG00000092140.13	-0.0679916	0.181721
ENSG00000092199.16	0.000902358	0.765335
ENSG00000092208.15	-0.14798	0.437217
ENSG00000092295.10	-0.00423348	0.785604
ENSG00000092330.14	-0.00753294	0.680582
ENSG00000092377.12	-0.369191	0.62939
ENSG00000092439.12	-0.00437266	0.717034
ENSG00000092758.14	-1.06543	0.112085
ENSG00000092871.15	0.0229796	0.496991
ENSG00000092929.10	-0.0382006	0.326192
ENSG00000093134.12	0.119476	0.774567
ENSG00000094631.17	0.0163111	0.00788223
ENSG00000094804.8	-0.0521419	0.558912
ENSG00000094914.11	0.000331126	0.989718
ENSG00000095059.14	-0.00872836	0.616639
ENSG00000095110.6	-1.80029	0.498947
ENSG00000095203.13	-0.0485721	0.481191
ENSG00000095261.12	0.00249289	0.911188
ENSG00000095370.18	0.00525254	0.589139
ENSG00000095383.18	-0.00937737	0.54153
ENSG00000095397.12	0.0257352	0.440693
ENSG00000095464.9	-2.41118	0.0624139
ENSG00000095485.15	-0.0116317	0.749662
ENSG00000095539.14	0.0448662	0.00299144
ENSG00000095585.15	-0.0271629	0.334326
ENSG00000095587.8	0.114924	0.719259
ENSG00000095627.8	0.0258369	0.546083
ENSG00000095739.10	0.00474728	0.728274
ENSG00000095752.5	0.265159	0.435262
ENSG00000095970.15	-0.00367704	0.80002
ENSG00000096092.5	0.0166184	0.296031
ENSG00000096401.7	0.0263726	0.0996508
ENSG00000096433.9	0.00531128	0.0752431
ENSG00000096717.10	0.0150091	0.46743
ENSG00000097007.16	0.00630453	0.403089
ENSG00000097096.8	0.00223771	0.977362
ENSG00000099204.17	0.00602171	0.0936441
ENSG00000099260.9	0.00693032	0.553498
ENSG00000099308.9	-0.00288825	0.91675
ENSG00000099330.7	0.00581275	0.776655
ENSG00000099337.4	-0.0211895	0.555288
ENSG00000099338.21	-0.198981	0.406693
ENSG00000099341.10	0.00351623	0.45793
ENSG00000099385.10	-0.00226975	0.727207
ENSG00000099617.3	-4.24989	0.265583
ENSG00000099624.6	-0.00315527	0.554683
ENSG00000099800.6	-0.00498611	0.624463
ENSG00000099804.7	-0.00717578	0.677964
ENSG00000099812.7	-0.0386426	0.419256
ENSG00000099814.14	-0.0174579	0.253716
ENSG00000099821.12	0.000701701	0.956323
ENSG00000099864.16	-0.008086	0.610046
ENSG00000099875.13	-0.000939596	0.838541
ENSG00000099901.15	-0.00668411	0.795253
ENSG00000099904.14	-0.000300781	0.986632
ENSG00000099942.11	0.0152425	0.244764
ENSG00000099954.17	-0.0964392	0.579768
ENSG00000099957.15	-1.86244	0.284482
ENSG00000099960.11	-0.599619	0.673136
ENSG00000099974.7	-0.230199	0.278224
ENSG00000099985.3	0.044624	0.163766
ENSG00000099991.15	-0.00203076	0.882548
ENSG00000099992.14	-0.0359212	0.473534
ENSG00000099994.10	0.00713543	0.486029
ENSG00000099998.16	-0.00465797	0.567617
ENSG00000100012.10	-13.1977	0.0953947
ENSG00000100023.16	-0.0242707	0.19599
ENSG00000100031.17	0.00143432	0.577478
ENSG00000100034.12	-0.00222345	0.758838
ENSG00000100038.18	-2.62126	0.075108
ENSG00000100053.8	-0.808346	0.258374
ENSG00000100056.10	0.0297433	0.446246
ENSG00000100060.16	0.0035636	0.892896
ENSG00000100065.13	0.0085476	0.313685
ENSG00000100068.10	-0.51768	0.00674209
ENSG00000100083.17	-0.0260314	0.213138
ENSG00000100092.19	-0.0222613	0.533555
ENSG00000100095.17	-0.106704	0.601715
ENSG00000100097.10	0.000211196	0.838656
ENSG00000100106.18	0.0126143	0.525469
ENSG00000100116.15	-0.0202038	0.58099
ENSG00000100122.5	-0.200721	0.691933
ENSG00000100139.12	-0.0255273	0.396342
ENSG00000100142.13	-1.19518	0.43606
ENSG00000100147.12	-0.3562	0.105207
ENSG00000100156.9	-0.481549	0.343812
ENSG00000100170.8	0.000171852	0.943163
ENSG00000100197.19	-0.78532	0.123952
ENSG00000100206.8	-0.690246	0.274751
ENSG00000100207.17	-0.0018781	0.914095
ENSG00000100220.10	-6.12046e-05	0.994149
ENSG00000100226.14	-0.00467584	0.784843
ENSG00000100276.9	-1.20684	0.158893
ENSG00000100280.15	-0.000334119	0.948041
ENSG00000100281.12	0.0148889	0.764264
ENSG00000100292.15	0.00134929	0.162299
ENSG00000100297.14	0.0144903	0.285781
ENSG00000100298.14	-0.0411184	0.841715
ENSG00000100335.11	0.0120707	0.445839
ENSG00000100348.8	-0.00219034	0.681205
ENSG00000100350.13	-0.0164753	0.647593
ENSG00000100353.16	0.00162523	0.689758
ENSG00000100359.19	-0.0298471	0.172454
ENSG00000100373.8	-0.590954	0.587437
ENSG00000100385.12	-0.00374683	0.750427
ENSG00000100399.14	-0.151816	0.485402
ENSG00000100401.18	-0.00483927	0.666291
ENSG00000100403.11	0.00225059	0.673899
ENSG00000100425.17	-0.02819	0.342239
ENSG00000100426.6	-0.037828	0.439645
ENSG00000100427.14	-0.349329	0.38045
ENSG00000100441.8	-0.00124417	0.930663
ENSG00000100445.15	-0.121548	0.180394
ENSG00000100478.13	-0.045741	0.49003
ENSG00000100479.11	-1.06407	0.0228823
ENSG00000100490.8	-0.0825048	0.293897
ENSG00000100519.10	-0.0183929	0.25068
ENSG00000100522.7	-0.0261224	0.361716
ENSG00000100567.11	-0.0213936	0.224868
ENSG00000100568.9	-0.0026726	0.712552
ENSG00000100592.14	-0.0157781	0.619788
ENSG00000100593.16	-0.228029	0.472244
ENSG00000100596.5	3.70425e-06	0.999312
ENSG00000100628.10	-0.0565731	0.533328
ENSG00000100652.4	-4.78368	0.2545
ENSG00000100714.14	0.00771554	0.223615
ENSG00000100726.13	-0.0210352	0.430621
ENSG00000100749.6	-0.091514	0.49635
ENSG00000100802.13	0.100058	0.304536
ENSG00000100804.17	0.00432018	0.687055
ENSG00000100842.11	-0.00468005	0.913648
ENSG00000100884.8	0.326766	0.475886
ENSG00000100908.12	-0.0350981	0.493919
ENSG00000100918.11	-0.0224014	0.760159
ENSG00000100926.13	0.0294342	0.717373
ENSG00000100949.13	-0.0079293	0.811986
ENSG00000100979.13	0.00122519	0.426092
ENSG00000100987.13	-0.0627007	0.82186
ENSG00000100997.17	0.00335489	0.590205
ENSG00000101049.13	-0.0206546	0.268019
ENSG00000101052.11	0.0123632	0.264775
ENSG00000101084.15	-0.00880937	0.815148
ENSG00000101096.18	-0.00504935	0.751928
ENSG00000101104.11	-0.0334963	0.28383
ENSG00000101146.11	0.000111564	0.997344
ENSG00000101161.7	0.00339644	0.396363
ENSG00000101203.15	-2.03309	0.2848
ENSG00000101220.16	0.00127163	0.944809
ENSG00000101222.11	-0.0438827	0.697456
ENSG00000101236.15	0.0246281	0.0208899
ENSG00000101255.9	0.00449036	0.0997742
ENSG00000101292.7	0.733132	0.669575
ENSG00000101294.15	-0.00037953	0.913248
ENSG00000101307.14	0.0226987	0.465636
ENSG00000101310.13	0.00420684	0.525411
ENSG00000101311.14	0.0413142	0.515006
ENSG00000101331.14	0.0143472	0.695391
ENSG00000101336.11	-0.0110043	0.594736
ENSG00000101337.14	0.00853493	0.117631
ENSG00000101342.8	-0.228521	0.237321
ENSG00000101367.8	0.00395779	0.579485
ENSG00000101391.19	-0.161351	0.0657048
ENSG00000101400.5	-0.00157913	0.818347
ENSG00000101443.16	-0.000689711	0.596175
ENSG00000101445.8	-0.0008662	0.936537
ENSG00000101447.12	0.168011	0.0477131
ENSG00000101460.11	-0.0224686	0.383694
ENSG00000101489.17	-0.0551842	0.64349
ENSG00000101680.12	0.00289631	0.7501
ENSG00000101883.4	-2.41879	0.141907
ENSG00000101911.11	0.00148853	0.850262
ENSG00000101928.11	-0.0482525	0.389713
ENSG00000101945.15	0.116852	0.190681
ENSG00000102001.11	0.22828	0.0143401
ENSG00000102003.9	-0.177955	0.46134
ENSG00000102007.9	0.00226733	0.410812
ENSG00000102024.16	0.000166903	0.974536
ENSG00000102038.14	0.0189321	0.0749221
ENSG00000102054.16	0.00676746	0.495511
ENSG00000102057.8	0.0826138	0.588327
ENSG00000102078.14	-0.0483989	0.752928
ENSG00000102096.9	-0.0015743	0.795657
ENSG00000102100.13	0.0261255	0.248768
ENSG00000102119.9	0.0138344	0.228954
ENSG00000102145.12	-1.60131	0.554694
ENSG00000102178.11	0.0144602	0.181271
ENSG00000102225.14	0.00227558	0.73724
ENSG00000102226.8	0.0044988	0.331676
ENSG00000102239.4	-4.40158	0.4191
ENSG00000102241.10	0.0235858	0.0356823
ENSG00000102245.6	-0.0508374	0.747655
ENSG00000102359.5	0.0342182	0.120042
ENSG00000102384.12	0.076205	0.821702
ENSG00000102710.18	-0.0107694	0.719132
ENSG00000102738.7	-0.0371395	0.435676
ENSG00000102760.12	0.00538798	0.259363
ENSG00000102781.12	0.0481322	0.0379614
ENSG00000102802.8	0.00817057	0.764121
ENSG00000102805.12	0.000545618	0.975186
ENSG00000102854.13	-0.000603863	0.766005
ENSG00000102858.11	0.0124528	0.0121826
ENSG00000102870.5	-0.00565115	0.717037
ENSG00000102898.10	-0.000172568	0.980402
ENSG00000102901.11	-0.0468099	0.186115
ENSG00000102908.19	-0.00740619	0.378046
ENSG00000102962.4	-0.160794	0.45238
ENSG00000103024.6	-0.00750889	0.478608
ENSG00000103034.13	0.0113434	0.803652
ENSG00000103037.10	-0.0552819	0.550119
ENSG00000103043.13	-0.000112661	0.991401
ENSG00000103047.6	0.0408514	0.414003
ENSG00000103064.12	-0.253429	0.0260296
ENSG00000103066.11	0.00586857	0.59205
ENSG00000103067.10	-0.0435598	0.3388
ENSG00000103154.8	0.00642049	0.807165
ENSG00000103168.15	-0.0253673	0.233837
ENSG00000103196.10	0.00268568	0.550294
ENSG00000103202.11	0.00683691	0.178309
ENSG00000103226.16	0.193756	0.0110501
ENSG00000103260.7	-0.00291993	0.809783
ENSG00000103264.14	0.0043236	0.852378
ENSG00000103269.12	-0.0694444	0.481442
ENSG00000103313.10	-0.0505355	0.675098
ENSG00000103319.10	0.0306056	0.0679938
ENSG00000103335.18	-0.00143876	0.766316
ENSG00000103351.11	0.0351225	0.213031
ENSG00000103375.9	-1.56277	0.743334
ENSG00000103460.15	0.0032522	0.805839
ENSG00000103485.16	0.00012752	0.948754
ENSG00000103489.10	0.0228151	0.429613
ENSG00000103495.12	0.0514828	0.0181508
ENSG00000103507.12	0.00812088	0.0447427
ENSG00000103510.18	-0.0064267	0.799482
ENSG00000103512.13	0.0149954	0.120084
ENSG00000103534.15	-0.981049	0.376565
ENSG00000103540.15	0.0310072	0.334074
ENSG00000103544.13	0.0167196	0.242249
ENSG00000103550.12	0.0298476	0.624365
ENSG00000103653.15	6.97262e-05	0.994668
ENSG00000103657.12	-0.00574375	0.473146
ENSG00000103742.10	0.00315402	0.851724
ENSG00000103932.10	0.0443779	0.153576
ENSG00000104055.13	0.115042	0.128227
ENSG00000104142.9	-0.00428525	0.697925
ENSG00000104205.11	-0.0620008	0.34585
ENSG00000104213.11	0.0217424	0.562086
ENSG00000104218.12	-0.145205	0.0569973
ENSG00000104219.11	-0.00787085	0.405112
ENSG00000104221.11	0.06114	0.292076
ENSG00000104341.15	0.0016777	0.708697
ENSG00000104450.11	0.0440668	0.328005
ENSG00000104522.14	0.00459967	0.724653
ENSG00000104524.12	-0.0136119	0.632938
ENSG00000104529.16	-0.00320993	0.587435
ENSG00000104635.12	0.00176396	0.0192244
ENSG00000104679.9	0.0229646	0.294915
ENSG00000104728.14	0.0180916	0.111747
ENSG00000104731.12	-0.0129642	0.642765
ENSG00000104805.14	0.00313859	0.0382123
ENSG00000104808.6	-0.0644855	0.398324
ENSG00000104823.7	0.00310717	0.105623
ENSG00000104824.15	0.0194217	0.0667112
ENSG00000104826.10	-17.7311	0.0583831
ENSG00000104852.13	-0.00907339	0.163758
ENSG00000104856.12	-0.00137675	0.94536
ENSG00000104859.13	-0.0413881	0.161515
ENSG00000104863.10	-0.411358	0.135675
ENSG00000104870.11	0.00177742	0.610303
ENSG00000104884.13	-0.00444985	0.816017
ENSG00000104889.4	-0.00287367	0.939902
ENSG00000104918.6	-1.80174	0.22336
ENSG00000104941.6	-10.45	0.205976
ENSG00000104957.12	-0.0465179	0.263026
ENSG00000104964.13	-0.000356469	0.794856
ENSG00000104970.9	-1.80434	0.46174
ENSG00000104972.13	-0.00803445	0.804154
ENSG00000104974.9	0.0163062	0.896036
ENSG00000104976.10	0.023627	0.587867
ENSG00000104980.6	-0.0165445	0.448231
ENSG00000104983.7	-0.0644201	0.513475
ENSG00000105048.15	-0.0602862	0.663011
ENSG00000105058.10	0.0129775	0.32754
ENSG00000105063.17	0.0074842	0.538074
ENSG00000105085.9	0.0543465	0.749457
ENSG00000105122.11	-0.037622	0.237489
ENSG00000105131.6	0.147337	0.0424073
ENSG00000105136.18	-0.208585	0.0566182
ENSG00000105137.11	0.0249141	0.145388
ENSG00000105146.11	-0.445627	0.411927
ENSG00000105176.16	0.00744027	0.651048
ENSG00000105197.9	-0.00367619	0.779532
ENSG00000105202.6	0.00343724	0.356684
ENSG00000105205.6	-0.72414	0.732496
ENSG00000105219.7	-9.5747	0.0370994
ENSG00000105221.15	-0.000733875	0.906143
ENSG00000105227.13	0.0446432	0.307949
ENSG00000105270.13	0.00244081	0.858784
ENSG00000105278.9	-3.64272	0.298564
ENSG00000105289.13	-0.128988	0.309216
ENSG00000105290.10	0.00537813	0.705289
ENSG00000105298.12	-0.0334168	0.523987
ENSG00000105321.11	-0.00966909	0.726027
ENSG00000105323.15	0.0114261	0.0106535
ENSG00000105325.12	0.0104339	0.629088
ENSG00000105341.17	0.000609633	0.957694
ENSG00000105355.7	0.0127943	0.106039
ENSG00000105366.14	-0.0016332	0.965173
ENSG00000105369.8	-0.00731146	0.755099
ENSG00000105370.6	-11.9285	0.144622
ENSG00000105372.5	5.59594e-06	0.987754
ENSG00000105373.17	0.000784198	0.523087
ENSG00000105374.8	-0.00276366	0.717517
ENSG00000105379.8	-0.00154709	0.709092
ENSG00000105383.13	-0.0660613	0.406784
ENSG00000105402.6	0.0028638	0.648425
ENSG00000105404.9	-0.00214482	0.672985
ENSG00000105409.14	-0.00841106	0.821777
ENSG00000105419.16	-0.0169793	0.767392
ENSG00000105447.11	-0.000977756	0.957107
ENSG00000105497.6	0.019244	0.743683
ENSG00000105499.12	0.010979	0.524501
ENSG00000105523.3	-0.957113	0.634597
ENSG00000105552.13	0.00238254	0.876034
ENSG00000105576.14	0.000349343	0.968642
ENSG00000105583.8	0.00225145	0.76579
ENSG00000105605.6	-2.42469	0.621858
ENSG00000105607.11	-0.017302	0.584736
ENSG00000105609.15	-0.0400783	0.445548
ENSG00000105639.17	-0.00133888	0.898757
ENSG00000105642.14	0.0178689	0.701601
ENSG00000105643.8	0.00145782	0.783587
ENSG00000105647.13	-0.330255	0.542919
ENSG00000105650.20	-0.0106521	0.692199
ENSG00000105655.17	0.0097194	0.394238
ENSG00000105656.11	-0.0465227	0.281706
ENSG00000105668.6	-2.43572	0.604335
ENSG00000105672.13	-0.0677363	0.85391
ENSG00000105695.13	-1.3347	0.212583
ENSG00000105697.6	0.00324197	0.982023
ENSG00000105698.14	0.00147992	0.824711
ENSG00000105699.15	0.00313118	0.619211
ENSG00000105700.9	0.0189707	0.154877
ENSG00000105701.14	0.0023006	0.326502
ENSG00000105707.12	0.0049473	0.0776679
ENSG00000105711.9	-0.0186659	0.432366
ENSG00000105717.12	-0.151581	0.435462
ENSG00000105726.15	-0.00355429	0.801092
ENSG00000105737.8	0.0209389	0.470808
ENSG00000105755.6	-0.0222619	0.496246
ENSG00000105767.2	-0.00225039	0.887179
ENSG00000105792.18	-0.0909622	0.301997
ENSG00000105808.16	-0.339225	0.399679
ENSG00000105829.10	-0.000793025	0.967163
ENSG00000105852.9	-0.0740073	0.75333
ENSG00000105854.11	0.00596194	0.204445
ENSG00000105856.12	0.0103273	0.173745
ENSG00000105880.4	0.172414	0.227973
ENSG00000105894.10	-0.0152359	0.355425
ENSG00000105939.11	0.00431962	0.694421
ENSG00000105953.13	0.00211197	0.104329
ENSG00000105996.6	0.209728	0.194116
ENSG00000105997.21	0.019606	0.486526
ENSG00000106004.4	0.0407279	0.103121
ENSG00000106006.6	0.157958	0.251279
ENSG00000106066.12	0.00311868	0.366463
ENSG00000106077.17	-0.012892	0.373021
ENSG00000106123.10	0.00570315	0.755993
ENSG00000106153.12	-0.000704203	0.728877
ENSG00000106258.12	-0.00177753	0.822458
ENSG00000106261.15	-0.000507024	0.951899
ENSG00000106330.10	0.022896	0.27042
ENSG00000106333.11	0.00411255	0.608204
ENSG00000106336.11	-0.933304	0.317008
ENSG00000106351.11	0.000822935	0.950492
ENSG00000106384.9	-0.00428759	0.937708
ENSG00000106392.9	-0.00333196	0.826102
ENSG00000106479.9	0.00639862	0.883868
ENSG00000106484.13	0.0118676	0.443176
ENSG00000106511.5	0.0470797	0.267447
ENSG00000106537.7	-0.00114613	0.938475
ENSG00000106609.15	0.0105477	0.058963
ENSG00000106615.8	-0.00164513	0.828105
ENSG00000106628.9	0.000885858	0.797403
ENSG00000106633.14	-0.116193	0.690972
ENSG00000106682.13	0.0155925	0.00173892
ENSG00000106701.10	-0.143749	0.220458
ENSG00000106771.11	-0.00113273	0.777664
ENSG00000106785.13	0.00790563	0.335031
ENSG00000106789.11	-0.00976688	0.832279
ENSG00000106809.9	0.00785099	0.611912
ENSG00000106823.11	-0.0023539	0.89622
ENSG00000106868.15	-0.0303021	0.287568
ENSG00000106927.10	-0.0320249	0.680476
ENSG00000106948.15	-0.00334949	0.75293
ENSG00000106992.16	-0.179166	0.180404
ENSG00000107020.8	-0.0261665	0.48186
ENSG00000107021.14	0.00615639	0.455825
ENSG00000107159.11	0.0025913	0.15279
ENSG00000107281.8	-0.00109569	0.870516
ENSG00000107317.10	0.00110061	0.772625
ENSG00000107331.15	0.00160991	0.756338
ENSG00000107404.16	-0.0126181	0.485415
ENSG00000107438.7	0.00606631	0.0121159
ENSG00000107521.17	0.0094575	0.285662
ENSG00000107537.12	-0.00322808	0.602643
ENSG00000107566.12	0.0333851	0.0629034
ENSG00000107593.16	-0.542493	0.233244
ENSG00000107611.13	0.000743891	0.0877159
ENSG00000107614.20	-0.0169839	0.792501
ENSG00000107625.11	0.0149229	0.472778
ENSG00000107672.13	-0.127554	0.080639
ENSG00000107738.18	0.00790334	0.35685
ENSG00000107742.11	0.00423365	0.151505
ENSG00000107829.12	0.009439	0.308873
ENSG00000107874.9	0.00929074	0.413995
ENSG00000107902.12	-0.00258636	0.91516
ENSG00000107951.11	-0.020537	0.738612
ENSG00000107960.9	0.0272775	0.416113
ENSG00000108187.14	0.00475891	0.211226
ENSG00000108219.13	0.00255239	0.575149
ENSG00000108262.14	0.00796248	0.459304
ENSG00000108309.11	-0.0074857	0.845597
ENSG00000108344.13	0.0155949	0.191766
ENSG00000108349.13	0.0184656	0.119598
ENSG00000108352.10	-0.0269381	0.643422
ENSG00000108375.11	0.0433911	0.350254
ENSG00000108387.13	0.00943495	0.530856
ENSG00000108389.8	0.00669879	0.692123
ENSG00000108405.3	-0.252048	0.246592
ENSG00000108448.19	0.0529691	0.263364
ENSG00000108468.13	0.0331239	0.0267821
ENSG00000108506.10	-0.00967901	0.835339
ENSG00000108511.9	-0.00253975	0.904329
ENSG00000108557.16	0.0215874	0.293067
ENSG00000108578.13	0.0102389	0.514557
ENSG00000108582.10	-0.000860189	0.74193
ENSG00000108587.13	0.0211012	0.22701
ENSG00000108588.12	0.00908832	0.102976
ENSG00000108592.15	0.00729166	0.670043
ENSG00000108599.13	0.0255249	0.385159
ENSG00000108604.14	-7.8114e-05	0.99438
ENSG00000108622.9	-0.00137456	0.958171
ENSG00000108639.6	0.000664226	0.807524
ENSG00000108651.8	-0.0332892	0.325937
ENSG00000108654.10	-0.0037491	0.0437865
ENSG00000108669.15	-0.0349687	0.133076
ENSG00000108671.8	0.00815443	0.554744
ENSG00000108684.13	-0.225499	0.441332
ENSG00000108784.8	-0.000989294	0.88546
ENSG00000108785.7	0.376113	0.616659
ENSG00000108786.9	-0.576237	0.312377
ENSG00000108788.10	0.0108005	0.415286
ENSG00000108799.11	0.0108139	0.579044
ENSG00000108819.10	0.00877253	0.228564
ENSG00000108821.12	9.89122e-05	0.527771
ENSG00000108829.9	0.006639	0.408922
ENSG00000108840.14	0.00838991	0.484417
ENSG00000108846.14	0.000674381	0.772091
ENSG00000108861.7	0.00470529	0.321035
ENSG00000108946.13	0.00161451	0.438575
ENSG00000108947.4	-0.0270198	0.817839
ENSG00000108963.16	0.0326644	0.270155
ENSG00000108984.12	0.0599549	0.350069
ENSG00000109047.7	-3.31333	0.658652
ENSG00000109061.9	-1.27858	0.435822
ENSG00000109063.13	-0.579291	0.0356205
ENSG00000109089.7	0.00832174	0.683415
ENSG00000109099.12	0.00901958	0.106492
ENSG00000109101.6	-0.2661	0.741419
ENSG00000109107.12	0.00542562	0.118186
ENSG00000109118.12	-0.00357092	0.883142
ENSG00000109184.13	0.00172872	0.921995
ENSG00000109255.10	0.0386319	0.49048
ENSG00000109270.11	-0.00505024	0.65118
ENSG00000109272.3	-0.0627671	0.700821
ENSG00000109458.7	0.0162694	0.301067
ENSG00000109654.13	-0.00209019	0.4537
ENSG00000109686.15	0.0119822	0.257279
ENSG00000109705.7	-2.04311	0.64705
ENSG00000109743.9	0.0608326	0.0471664
ENSG00000109758.7	-0.852007	0.39755
ENSG00000109790.15	0.0123766	0.383275
ENSG00000109854.12	0.0195043	0.101714
ENSG00000109881.15	-0.00855385	0.804716
ENSG00000109906.12	0.00639877	0.647966
ENSG00000109917.9	0.00671415	0.751972
ENSG00000109919.8	0.00187496	0.80644
ENSG00000109920.11	-0.0213136	0.174905
ENSG00000109943.7	-0.0505311	0.610396
ENSG00000109944.9	-0.115677	0.18074
ENSG00000109971.12	9.2962e-05	0.872517
ENSG00000110011.12	-0.00392205	0.715685
ENSG00000110047.16	0.00234535	0.69855
ENSG00000110075.13	-0.0122504	0.338133
ENSG00000110076.17	-0.00319754	0.663772
ENSG00000110090.11	-0.00189941	0.612779
ENSG00000110169.9	-0.806317	0.304155
ENSG00000110171.17	-0.0132881	0.858874
ENSG00000110200.7	-0.0480154	0.428425
ENSG00000110237.3	0.00347984	0.399351
ENSG00000110245.10	-0.0267362	0.932469
ENSG00000110330.7	0.00981776	0.26535
ENSG00000110344.8	0.00714237	0.603501
ENSG00000110455.12	-0.0538551	0.139135
ENSG00000110492.14	0.00733595	0.00876949
ENSG00000110497.13	0.017623	0.406105
ENSG00000110619.15	0.00922262	0.491799
ENSG00000110651.10	0.000834604	0.14394
ENSG00000110719.8	-0.00442925	0.691409
ENSG00000110723.10	-0.0126695	0.506152
ENSG00000110786.16	-0.551589	0.230567
ENSG00000110799.12	0.000231	0.332572
ENSG00000110811.18	-2.39725e-05	0.998336
ENSG00000110841.12	0.00440475	0.210358
ENSG00000110881.10	-0.0565355	0.583844
ENSG00000110917.6	0.00184015	0.0736233
ENSG00000110925.5	-0.0140977	0.657312
ENSG00000110934.9	-0.0506383	0.169505
ENSG00000110955.7	1.03234e-05	0.981461
ENSG00000111077.16	0.000831243	0.815381
ENSG00000111087.8	0.0987142	0.542802
ENSG00000111181.11	0.00115995	0.836746
ENSG00000111196.8	-0.130879	0.159682
ENSG00000111229.14	0.00374673	0.318323
ENSG00000111266.7	0.0109149	0.413516
ENSG00000111269.2	0.00783598	0.12293
ENSG00000111276.9	0.0145561	0.044481
ENSG00000111300.8	-0.00541795	0.882554
ENSG00000111319.11	-0.00129486	0.497896
ENSG00000111321.9	0.0129695	0.00809471
ENSG00000111331.11	0.0107326	0.0140665
ENSG00000111335.11	0.00512825	0.285932
ENSG00000111348.7	0.00214822	0.401567
ENSG00000111405.7	-3.43952	0.19623
ENSG00000111424.9	-0.010429	0.482947
ENSG00000111445.12	0.112783	0.0817775
ENSG00000111490.11	-0.0320504	0.659845
ENSG00000111602.10	0.0350995	0.415241
ENSG00000111615.11	-0.00040201	0.984503
ENSG00000111641.9	-0.0080495	0.795092
ENSG00000111642.13	0.00764232	0.0857595
ENSG00000111644.6	0.0697981	0.478787
ENSG00000111652.8	0.00735433	0.286006
ENSG00000111664.9	-1.07557	0.289465
ENSG00000111669.13	0.000466291	0.118696
ENSG00000111670.13	0.0050287	0.68059
ENSG00000111676.13	0.00810628	0.134213
ENSG00000111679.15	0.00414533	0.715408
ENSG00000111684.9	0.01414	0.252009
ENSG00000111716.11	0.000514985	0.4763
ENSG00000111801.14	-0.0031093	0.706687
ENSG00000111837.10	-1.9807	0.0520166
ENSG00000111846.14	0.0227057	0.155005
ENSG00000111850.9	-0.410514	0.0160346
ENSG00000111860.12	-0.0755902	0.283098
ENSG00000111911.6	0.00847558	0.59518
ENSG00000111981.4	0.180186	0.607147
ENSG00000112031.14	-0.0275082	0.779421
ENSG00000112039.3	-0.22669	0.305001
ENSG00000112159.10	-0.00735967	0.585802
ENSG00000112195.8	0.185677	0.838346
ENSG00000112200.15	-0.0414896	0.17466
ENSG00000112208.11	-0.053597	0.438581
ENSG00000112212.10	-2.17657	0.323639
ENSG00000112242.13	0.0117218	0.81076
ENSG00000112299.7	-0.00483388	0.387337
ENSG00000112303.12	0.00689009	0.623017
ENSG00000112308.11	0.00192685	0.700918
ENSG00000112319.16	-0.106358	0.530031
ENSG00000112343.10	0.00157658	0.84491
ENSG00000112357.11	-0.0230187	0.589074
ENSG00000112486.13	0.0650225	0.770987
ENSG00000112494.8	-0.00102546	0.975551
ENSG00000112499.11	0.00253121	0.0478729
ENSG00000112511.16	-0.00769533	0.445732
ENSG00000112584.12	0.0120141	0.583821
ENSG00000112640.13	0.037189	0.122551
ENSG00000112655.14	0.0105292	0.281231
ENSG00000112658.7	-0.00907345	0.285427
ENSG00000112667.11	0.00158888	0.822026
ENSG00000112701.16	-0.0140189	0.251316
ENSG00000112759.15	0.00196399	0.800444
ENSG00000112763.14	0.00478769	0.823616
ENSG00000112852.6	0.0798219	0.00398338
ENSG00000112874.8	-0.000370457	0.970016
ENSG00000112893.8	-0.000604405	0.837334
ENSG00000112941.11	-0.0202797	0.441418
ENSG00000112964.12	0.0076621	0.423989
ENSG00000113070.7	0.021327	0.0723645
ENSG00000113088.5	-0.00446414	0.745299
ENSG00000113194.11	0.0268229	0.0292615
ENSG00000113205.4	0.0341013	0.13729
ENSG00000113209.8	0.0553839	0.00561635
ENSG00000113211.5	0.0249359	0.277993
ENSG00000113212.6	0.0723164	0.100082
ENSG00000113262.13	-0.769634	0.490981
ENSG00000113269.12	0.0170904	0.0196213
ENSG00000113272.12	0.09154	0.00889627
ENSG00000113273.14	0.0149536	0.0203812
ENSG00000113300.10	0.0165571	0.200008
ENSG00000113312.9	0.00540539	0.331793
ENSG00000113387.10	-8.93749e-05	0.989246
ENSG00000113460.11	-0.00954447	0.787882
ENSG00000113552.14	0.0118651	0.0160816
ENSG00000113569.14	0.0134621	0.485009
ENSG00000113594.8	-0.00168689	0.674315
ENSG00000113600.9	-0.436577	0.340917
ENSG00000113621.13	0.01023	0.221001
ENSG00000113638.11	0.00602429	0.8348
ENSG00000113643.7	0.0101491	0.262128
ENSG00000113658.15	0.00862085	0.245267
ENSG00000113716.11	0.0322775	0.0418486
ENSG00000113719.14	0.00346662	0.0192263
ENSG00000113722.15	-1.54971	0.61782
ENSG00000113732.7	0.000450072	0.818983
ENSG00000113758.12	0.000175307	0.974453
ENSG00000113811.9	-0.0236111	0.22254
ENSG00000113812.12	-0.00865231	0.80707
ENSG00000113851.12	-0.00940883	0.563545
ENSG00000113889.10	-0.000884047	0.90847
ENSG00000113905.4	0.245861	0.27177
ENSG00000113966.8	-0.0207922	0.584673
ENSG00000114019.13	0.00419085	0.196544
ENSG00000114021.10	-0.000684622	0.872527
ENSG00000114026.20	0.0108682	0.716013
ENSG00000114030.11	-0.00241653	0.909143
ENSG00000114126.16	-0.00073524	0.954468
ENSG00000114127.9	-0.0101159	0.436281
ENSG00000114251.12	-0.0234833	0.634722
ENSG00000114268.10	0.0245438	0.0628969
ENSG00000114270.14	-0.00476993	0.863772
ENSG00000114315.3	-0.00329184	0.659763
ENSG00000114331.11	-0.00152521	0.890514
ENSG00000114353.15	0.00314761	0.089752
ENSG00000114374.11	0.0105207	0.378364
ENSG00000114378.15	-0.00900707	0.476643
ENSG00000114383.8	-0.0210455	0.38158
ENSG00000114391.11	-0.000243233	0.72128
ENSG00000114491.12	0.0446776	0.0502907
ENSG00000114520.9	0.0135548	0.11849
ENSG00000114529.11	-0.0419431	0.596664
ENSG00000114544.14	0.00502411	0.685086
ENSG00000114626.16	-0.00820056	0.697773
ENSG00000114646.8	-0.0462453	0.924125
ENSG00000114654.7	0.0370107	0.716648
ENSG00000114686.7	-0.00063237	0.933992
ENSG00000114744.7	0.00212422	0.905581
ENSG00000114770.15	-0.045058	0.103255
ENSG00000114854.6	-0.152188	0.616682
ENSG00000114867.18	0.00399182	0.164843
ENSG00000114904.11	-0.00397739	0.936653
ENSG00000114956.18	0.00216003	0.904596
ENSG00000114993.14	0.0112319	0.156175
ENSG00000115008.5	-4.3415	0.176232
ENSG00000115009.10	0.00371056	0.425983
ENSG00000115041.11	-0.000591699	0.96943
ENSG00000115053.14	0.00488329	0.0292778
ENSG00000115204.13	0.00924287	0.301982
ENSG00000115226.8	-0.00499109	0.867476
ENSG00000115266.10	0.0966377	0.485333
ENSG00000115268.8	0.000107612	0.938413
ENSG00000115275.10	0.0113217	0.424754
ENSG00000115286.18	-0.00728483	0.4702
ENSG00000115289.11	0.0459278	0.403397
ENSG00000115318.10	0.068943	0.167619
ENSG00000115364.12	0.00194673	0.924434
ENSG00000115504.13	0.00278191	0.615469
ENSG00000115507.8	-3.27152	0.420265
ENSG00000115520.7	-0.0124596	0.470325
ENSG00000115524.14	0.00181327	0.625138
ENSG00000115590.12	0.0119604	0.0297191
ENSG00000115594.10	0.00794347	0.149141
ENSG00000115596.3	-0.24754	0.534628
ENSG00000115598.8	0.0252412	0.682264
ENSG00000115607.8	-0.304315	0.241909
ENSG00000115648.12	-0.154554	0.146543
ENSG00000115649.14	0.00289121	0.402468
ENSG00000115657.11	0.0248479	0.527705
ENSG00000115750.15	0.0291488	0.340055
ENSG00000115760.12	0.00158248	0.747223
ENSG00000115808.10	0.0181558	0.227547
ENSG00000115841.18	-0.0908617	0.454886
ENSG00000115850.8	-19.3675	0.0827552
ENSG00000115902.9	4.3026e-05	0.997735
ENSG00000115904.11	0.00779997	0.378899
ENSG00000115935.15	0.00177419	0.767955
ENSG00000115998.6	0.0134282	0.910607
ENSG00000116001.14	-0.0221833	0.131205
ENSG00000116014.8	-0.00383356	0.846276
ENSG00000116017.9	-0.0683183	0.329701
ENSG00000116030.15	0.0037798	0.654031
ENSG00000116031.8	-0.00605486	0.854991
ENSG00000116032.5	-1.59623	0.106428
ENSG00000116035.2	-0.48978	0.493169
ENSG00000116039.10	-0.0270943	0.605835
ENSG00000116095.9	-0.00847436	0.768748
ENSG00000116161.16	0.0130272	0.18692
ENSG00000116176.6	-0.0199227	0.665128
ENSG00000116199.10	0.0128115	0.436125
ENSG00000116251.8	0.0024462	0.293148
ENSG00000116254.16	-0.0480148	0.579789
ENSG00000116266.9	-0.000154133	0.99214
ENSG00000116396.12	-0.0102165	0.653831
ENSG00000116478.10	0.00528232	0.626234
ENSG00000116489.11	0.00348646	0.46159
ENSG00000116525.12	0.0660014	0.615598
ENSG00000116544.10	-0.228674	0.65795
ENSG00000116584.16	0.0110476	0.220838
ENSG00000116604.16	0.0127085	0.0984965
ENSG00000116649.8	0.00190433	0.836136
ENSG00000116675.14	0.0503996	0.194858
ENSG00000116678.17	0.00620092	0.647975
ENSG00000116685.14	0.0101421	0.22979
ENSG00000116688.15	0.00714924	0.358399
ENSG00000116691.9	-0.0321005	0.543515
ENSG00000116729.12	0.0120928	0.0381545
ENSG00000116741.7	0.00617048	0.263353
ENSG00000116748.18	-0.166716	0.73541
ENSG00000116752.5	0.0347869	0.15475
ENSG00000116761.10	0.00973493	0.916225
ENSG00000116771.5	0.005075	0.407696
ENSG00000116786.10	0.00594683	0.599368
ENSG00000116815.14	-0.018863	0.557178
ENSG00000116857.15	0.00739731	0.0770027
ENSG00000116885.17	0.0301388	0.489958
ENSG00000116898.10	-0.00357219	0.653698
ENSG00000116957.11	0.00951829	0.781916
ENSG00000116962.13	0.00234308	0.0742461
ENSG00000117000.8	0.00871496	0.573659
ENSG00000117016.8	-0.00407447	0.971519
ENSG00000117069.13	-1.45239	0.392836
ENSG00000117118.8	-2.81788e-06	0.999683
ENSG00000117122.12	0.0338463	0.6056
ENSG00000117153.14	0.0198667	0.279847
ENSG00000117154.10	0.085977	0.141152
ENSG00000117155.15	0.0168728	0.0326431
ENSG00000117222.12	0.0339053	0.268927
ENSG00000117245.11	0.186723	0.0283184
ENSG00000117305.13	-0.000941439	0.924977
ENSG00000117308.13	0.00606297	0.444191
ENSG00000117318.8	0.00497354	0.210055
ENSG00000117322.15	0.0603961	0.762219
ENSG00000117360.11	-0.0477376	0.0566157
ENSG00000117407.15	0.00920383	0.957808
ENSG00000117410.12	-0.00422906	0.337225
ENSG00000117411.15	-0.000442476	0.972712
ENSG00000117425.12	-0.218546	0.379662
ENSG00000117481.9	0.0327041	0.30764
ENSG00000117533.13	-0.0228347	0.512641
ENSG00000117586.9	0.0656294	0.452522
ENSG00000117594.8	-0.248557	0.276503
ENSG00000117595.9	-0.00615792	0.516224
ENSG00000117682.15	0.00522602	0.542609
ENSG00000117713.16	0.0055934	0.562643
ENSG00000117751.16	0.0141935	0.652292
ENSG00000117758.12	0.00351373	0.747986
ENSG00000117791.14	0.0137889	0.12642
ENSG00000117859.17	0.0161019	0.0932623
ENSG00000117899.9	0.00884111	0.508571
ENSG00000117971.10	-0.0294486	0.838609
ENSG00000118017.3	-0.0597406	0.831755
ENSG00000118094.10	-0.0647561	0.311918
ENSG00000118113.10	-0.951927	0.589206
ENSG00000118156.11	0.0776909	0.0482282
ENSG00000118160.12	-1.41373	0.439221
ENSG00000118200.13	0.010515	0.336548
ENSG00000118242.14	-0.0227614	0.607679
ENSG00000118292.7	-0.00830092	0.793418
ENSG00000118402.5	-0.0933399	0.533091
ENSG00000118412.11	-0.0297726	0.524391
ENSG00000118473.20	0.0096111	0.644855
ENSG00000118496.4	-0.0485124	0.157221
ENSG00000118620.11	-0.0344218	0.682515
ENSG00000118762.6	0.0114421	0.0168142
ENSG00000118816.8	0.000266952	0.775144
ENSG00000118873.14	0.0169457	0.145531
ENSG00000118961.13	0.0119726	0.72615
ENSG00000119041.9	-0.0127046	0.721678
ENSG00000119231.9	-0.0358757	0.303983
ENSG00000119326.13	-0.0230935	0.220971
ENSG00000119333.10	-0.001372	0.772372
ENSG00000119335.15	0.001981	0.580597
ENSG00000119392.13	0.0171886	0.455118
ENSG00000119403.12	0.0227432	0.627481
ENSG00000119414.10	-0.00315511	0.747075
ENSG00000119431.8	-0.00653836	0.751434
ENSG00000119535.16	-0.00269738	0.919439
ENSG00000119547.5	-0.0246635	0.814934
ENSG00000119559.14	-0.023705	0.318363
ENSG00000119574.11	0.0842538	0.213412
ENSG00000119640.7	-0.130635	0.351094
ENSG00000119673.13	-0.0149612	0.635335
ENSG00000119681.10	0.00074532	0.799976
ENSG00000119684.14	-0.00998246	0.699762
ENSG00000119689.13	-0.00131469	0.768202
ENSG00000119718.9	0.0157473	0.160825
ENSG00000119737.5	-0.64939	0.288198
ENSG00000119777.17	0.0080863	0.141535
ENSG00000119820.9	-0.00341584	0.821497
ENSG00000119919.10	0.324364	0.173691
ENSG00000119922.8	0.0155484	0.0509777
ENSG00000119943.9	0.030183	0.512308
ENSG00000119977.19	0.023036	0.0415269
ENSG00000120029.11	0.0313765	0.310871
ENSG00000120049.17	0.1179	0.48179
ENSG00000120068.6	0.0192123	0.228623
ENSG00000120075.5	-0.0342741	0.616613
ENSG00000120088.13	0.00950824	0.726967
ENSG00000120093.10	-0.0241509	0.36875
ENSG00000120094.6	-0.369746	0.704951
ENSG00000120129.5	0.000436428	0.235999
ENSG00000120156.19	0.00339181	0.684164
ENSG00000120160.9	-15.2331	0.0335139
ENSG00000120306.8	-5.25057e-05	0.982562
ENSG00000120318.14	-0.00263712	0.803881
ENSG00000120322.3	0.0758777	0.00326123
ENSG00000120324.6	0.143492	6.44623e-05
ENSG00000120327.6	0.0376971	0.0300689
ENSG00000120328.6	0.145718	0.0209809
ENSG00000120437.8	0.0659406	0.209303
ENSG00000120440.12	-0.0157291	0.925973
ENSG00000120451.9	-0.00255139	0.761415
ENSG00000120669.14	-0.0673167	0.90439
ENSG00000120686.10	0.00201204	0.792688
ENSG00000120693.12	0.0152671	0.082787
ENSG00000120696.8	0.0586132	0.214872
ENSG00000120697.7	-0.00583889	0.727096
ENSG00000120709.9	0.0100905	0.350922
ENSG00000120727.11	0.0212871	0.0111599
ENSG00000120733.12	0.0157684	0.0491001
ENSG00000120738.7	0.000219893	0.62119
ENSG00000120784.14	-0.0608047	0.391248
ENSG00000120875.7	-0.0239263	0.368256
ENSG00000120910.13	-0.0390487	0.365964
ENSG00000120913.22	0.00286881	0.895155
ENSG00000120948.14	-0.00153457	0.888485
ENSG00000120963.10	-0.00579784	0.798459
ENSG00000121089.4	0.101457	0.157844
ENSG00000121152.8	0.0375083	0.785304
ENSG00000121210.14	0.0133759	0.707923
ENSG00000121211.6	0.116731	0.72314
ENSG00000121236.18	0.0157827	0.439412
ENSG00000121318.2	-9.7826	0.0462946
ENSG00000121361.3	0.0137446	0.346508
ENSG00000121406.7	-0.0648485	0.351995
ENSG00000121413.11	-0.00157089	0.92457
ENSG00000121417.12	-0.137935	0.081203
ENSG00000121446.16	-0.0105419	0.992056
ENSG00000121542.10	0.012374	0.793002
ENSG00000121552.3	-0.0296351	0.80865
ENSG00000121570.11	-10.8352	0.091502
ENSG00000121653.10	0.0115813	0.548181
ENSG00000121671.10	-0.000947755	0.878096
ENSG00000121680.14	-0.0047922	0.856631
ENSG00000121690.8	0.0476471	0.118962
ENSG00000121691.4	-0.000293972	0.885175
ENSG00000121716.17	-0.117163	0.11282
ENSG00000121775.16	0.109336	0.0656079
ENSG00000121807.5	-0.0572967	0.162577
ENSG00000121864.8	0.00740515	0.730804
ENSG00000121903.13	0.0823645	0.576626
ENSG00000121904.16	0.0293882	0.706499
ENSG00000121940.14	0.0427696	0.170073
ENSG00000122012.12	-1.13314	0.177948
ENSG00000122068.11	-0.0016758	0.87882
ENSG00000122085.15	-0.00783472	0.855898
ENSG00000122133.15	-0.0813963	0.63579
ENSG00000122176.10	0.0202932	0.00271201
ENSG00000122194.17	-0.00283634	0.676083
ENSG00000122367.18	0.0576762	0.40571
ENSG00000122375.10	-0.0812928	0.89109
ENSG00000122386.9	0.0219	0.406387
ENSG00000122406.11	2.89693e-05	0.953884
ENSG00000122417.14	-0.0550759	0.221922
ENSG00000122477.11	-1.29176	0.0476745
ENSG00000122490.17	0.00776382	0.37651
ENSG00000122547.9	-0.00874167	0.845989
ENSG00000122642.9	0.00592931	0.00076754
ENSG00000122694.14	-0.0108017	0.656683
ENSG00000122756.13	-0.245629	0.447568
ENSG00000122877.12	-0.0160957	0.488903
ENSG00000122884.11	0.00492904	0.0836986
ENSG00000122912.13	-0.029458	0.324704
ENSG00000122958.13	0.00258397	0.808036
ENSG00000122971.7	-0.00245713	0.668617
ENSG00000122986.12	0.0467452	0.41121
ENSG00000123144.9	-0.000844708	0.813281
ENSG00000123159.14	-0.00589894	0.501098
ENSG00000123178.13	0.0775237	0.0649753
ENSG00000123201.13	-0.00784968	0.946672
ENSG00000123268.7	0.00756691	0.803917
ENSG00000123297.15	-0.0210879	0.44071
ENSG00000123338.11	-0.00320975	0.688379
ENSG00000123342.14	0.00133106	0.919798
ENSG00000123349.12	-0.000464458	0.659585
ENSG00000123352.16	0.0380092	0.227528
ENSG00000123358.18	-0.0010742	0.405842
ENSG00000123360.10	0.0375538	0.161265
ENSG00000123384.12	0.00157046	0.0511423
ENSG00000123388.4	0.0509339	0.517513
ENSG00000123395.13	-0.027803	0.345705
ENSG00000123407.3	0.584331	0.447686
ENSG00000123411.13	0.0172336	0.783387
ENSG00000123416.14	0.00512306	0.097138
ENSG00000123453.15	0.0835252	0.0207214
ENSG00000123595.6	-0.000418735	0.983377
ENSG00000123609.9	0.0162333	0.384772
ENSG00000123689.5	-0.00301052	0.709234
ENSG00000123739.9	-0.00284782	0.770781
ENSG00000123838.9	0.0251994	0.888164
ENSG00000123843.11	-9.49709	0.0559628
ENSG00000123870.10	-0.163141	0.493056
ENSG00000123933.13	0.00821142	0.225618
ENSG00000123975.4	-0.0407493	0.356175
ENSG00000123999.4	0.00454749	0.221651
ENSG00000124006.13	0.00153143	0.294053
ENSG00000124067.15	0.0100656	0.302223
ENSG00000124092.11	-4.11154	0.306098
ENSG00000124097.7	1.59218	0.0612926
ENSG00000124103.8	-7.83959	0.16013
ENSG00000124134.7	-0.0111934	0.655857
ENSG00000124143.9	-0.00887048	0.90957
ENSG00000124155.15	0.00691251	0.0640811
ENSG00000124157.6	-1.86615	0.893904
ENSG00000124193.13	-0.0148494	0.0443098
ENSG00000124222.20	0.00266886	0.81308
ENSG00000124226.9	0.00521743	0.58875
ENSG00000124256.13	-0.233335	0.272672
ENSG00000124257.6	-0.652481	0.27021
ENSG00000124313.11	0.013266	0.530112
ENSG00000124333.13	0.0168705	0.136205
ENSG00000124356.14	0.0308987	0.0331656
ENSG00000124440.14	0.0155024	0.669583
ENSG00000124466.8	-0.159817	0.536188
ENSG00000124486.11	0.000667224	0.85507
ENSG00000124496.11	-0.0131463	0.780723
ENSG00000124508.15	-0.0132008	0.545535
ENSG00000124541.6	-0.0281671	0.459223
ENSG00000124549.13	-0.0871005	0.535687
ENSG00000124564.16	-0.000147829	0.878565
ENSG00000124568.9	-0.0112387	0.311573
ENSG00000124587.12	-0.00734888	0.703667
ENSG00000124588.18	0.000114339	0.980025
ENSG00000124593.13	-0.07675	0.370837
ENSG00000124608.4	0.0422148	0.332662
ENSG00000124657.1	-4.42956	0.409676
ENSG00000124701.5	-1.16166	0.52456
ENSG00000124762.12	-0.00253986	0.251046
ENSG00000124766.5	0.00333623	0.310805
ENSG00000124795.13	0.00288387	0.592451
ENSG00000124802.10	-0.0345005	0.600052
ENSG00000124831.17	0.00385128	0.482359
ENSG00000124875.8	-0.0108025	0.775008
ENSG00000124920.12	0.00962501	0.0834194
ENSG00000124942.12	0.000159925	0.588641
ENSG00000125046.13	-0.0659096	0.868
ENSG00000125084.10	-11.7349	0.060612
ENSG00000125089.15	-0.0142431	0.211932
ENSG00000125148.6	0.000557902	0.58174
ENSG00000125149.10	0.0409776	0.169579
ENSG00000125249.6	0.00450405	0.594095
ENSG00000125257.12	0.00326002	0.569937
ENSG00000125266.6	0.00340484	0.380884
ENSG00000125319.13	-0.0677204	0.71359
ENSG00000125347.12	-0.00362052	0.437017
ENSG00000125351.9	0.0367619	0.637579
ENSG00000125378.14	0.00171014	0.93322
ENSG00000125414.17	-1.3462	0.528604
ENSG00000125434.9	-0.115542	0.313708
ENSG00000125449.5	-0.0122116	0.699332
ENSG00000125498.18	-1.24519	0.456703
ENSG00000125503.11	0.00476258	0.724987
ENSG00000125520.12	0.00202978	0.727309
ENSG00000125551.17	-4.68709	0.44273
ENSG00000125611.14	-0.00149519	0.935948
ENSG00000125630.14	0.0352375	0.158823
ENSG00000125637.14	0.0087368	0.517142
ENSG00000125648.13	0.00921806	0.10745
ENSG00000125650.4	-0.0715196	0.725655
ENSG00000125691.11	0.000701713	0.451877
ENSG00000125730.15	0.000149246	0.199393
ENSG00000125735.9	0.00125768	0.979222
ENSG00000125741.4	-0.0041858	0.81325
ENSG00000125744.10	0.00163958	0.971722
ENSG00000125746.13	-0.0132872	0.505208
ENSG00000125753.12	-0.00218249	0.767872
ENSG00000125787.10	-13.3748	0.10153
ENSG00000125798.13	0.315673	0.0485365
ENSG00000125810.9	0.000845428	0.429367
ENSG00000125821.10	0.00735066	0.460157
ENSG00000125826.18	0.00266363	0.223945
ENSG00000125835.16	-0.00356475	0.5677
ENSG00000125841.11	0.0100146	0.331634
ENSG00000125843.9	-0.0163261	0.684826
ENSG00000125900.11	1.49812	0.558158
ENSG00000125901.5	-0.00884998	0.50994
ENSG00000125910.5	-0.111627	0.31569
ENSG00000125912.9	0.0014217	0.845721
ENSG00000125952.17	0.00541448	0.780891
ENSG00000125966.9	0.0115092	0.0652898
ENSG00000125971.15	-9.40758e-05	0.971981
ENSG00000126005.14	0.0015732	0.821198
ENSG00000126012.10	-0.00153399	0.819925
ENSG00000126062.3	0.00265089	0.830434
ENSG00000126091.18	0.0191501	0.270244
ENSG00000126217.19	0.000281788	0.966308
ENSG00000126218.10	0.0161409	0.349237
ENSG00000126231.12	-0.394291	0.560716
ENSG00000126243.7	-0.0427331	0.466941
ENSG00000126246.8	-0.472242	0.0961788
ENSG00000126254.10	0.000185771	0.982039
ENSG00000126267.7	-0.00136117	0.57875
ENSG00000126337.12	-0.387438	0.840179
ENSG00000126391.12	0.0108961	0.357395
ENSG00000126458.3	0.00256927	0.67925
ENSG00000126467.9	-0.615263	0.702995
ENSG00000126562.15	0.0442513	0.030551
ENSG00000126583.9	-3.58322	0.43491
ENSG00000126602.9	0.0147812	0.0735124
ENSG00000126653.14	0.0332654	0.265217
ENSG00000126698.9	0.00178	0.870774
ENSG00000126705.12	0.00796266	0.436374
ENSG00000126709.13	0.00359794	0.00154934
ENSG00000126746.16	0.0483615	0.0897395
ENSG00000126759.11	-0.19072	0.125449
ENSG00000126767.16	0.0231699	0.104796
ENSG00000126775.8	-0.00270753	0.924494
ENSG00000126787.11	0.0725588	0.409385
ENSG00000126860.10	0.0135837	0.652869
ENSG00000126861.4	-1.1566	0.329489
ENSG00000126878.11	0.00124963	0.337017
ENSG00000126883.15	0.0161316	0.192927
ENSG00000126903.14	0.0423418	0.0200964
ENSG00000126950.7	-0.202845	0.567278
ENSG00000126953.5	-0.0850519	0.463617
ENSG00000127022.13	0.00129898	0.00208825
ENSG00000127080.8	-0.188343	0.32379
ENSG00000127081.12	-0.105206	0.328266
ENSG00000127083.7	-0.0188457	0.891094
ENSG00000127191.16	-0.00116727	0.970328
ENSG00000127241.15	-7.49539e-05	0.990464
ENSG00000127311.8	-0.108186	0.229762
ENSG00000127324.7	0.038485	0.117466
ENSG00000127337.5	0.0131331	0.712856
ENSG00000127364.3	-0.649986	0.450535
ENSG00000127366.5	-0.698243	0.362953
ENSG00000127412.5	-0.39664	0.844999
ENSG00000127511.8	-0.0100685	0.504996
ENSG00000127527.12	-0.000916888	0.965677
ENSG00000127533.3	0.00054644	0.932415
ENSG00000127540.10	-0.00428271	0.473146
ENSG00000127578.6	0.0691038	0.466087
ENSG00000127580.14	-0.044825	0.373781
ENSG00000127585.10	0.00129509	0.777426
ENSG00000127603.22	0.000691638	0.701034
ENSG00000127666.9	0.0209318	0.126488
ENSG00000127804.11	-0.00297725	0.810449
ENSG00000127884.4	0.000326655	0.856612
ENSG00000127920.5	0.00156503	0.653306
ENSG00000127928.11	0.429905	0.00304588
ENSG00000127946.15	0.00761589	0.220965
ENSG00000127957.15	-0.377491	0.201492
ENSG00000128000.14	-0.101934	0.0745114
ENSG00000128016.5	0.000261025	0.734783
ENSG00000128159.10	-0.0398425	0.0252555
ENSG00000128191.12	-0.0281103	0.452359
ENSG00000128218.7	0.14397	0.769244
ENSG00000128228.4	-0.02811	0.327753
ENSG00000128242.11	0.00182964	0.26285
ENSG00000128245.13	0.00248265	0.509942
ENSG00000128253.12	-1.94383	0.397771
ENSG00000128268.11	-0.0105905	0.388945
ENSG00000128272.13	-0.00202883	0.407956
ENSG00000128276.9	-2.32913	0.655575
ENSG00000128283.6	0.00278053	0.746241
ENSG00000128294.14	-0.0010355	0.874214
ENSG00000128340.13	0.000690757	0.935826
ENSG00000128394.15	0.0101519	0.869141
ENSG00000128422.14	0.000942353	0.320994
ENSG00000128482.14	-0.242526	0.506274
ENSG00000128510.9	-0.00216695	0.798265
ENSG00000128563.12	-0.00712459	0.798675
ENSG00000128564.6	-0.0424687	0.820417
ENSG00000128567.15	0.000852017	0.385807
ENSG00000128578.8	0.0458981	0.0237729
ENSG00000128591.14	0.00991586	0.0505122
ENSG00000128595.15	0.00651741	0.029866
ENSG00000128596.15	-0.256635	0.591262
ENSG00000128607.12	0.0194237	0.000374953
ENSG00000128609.13	-0.00207221	0.622632
ENSG00000128655.15	-0.0212338	0.69898
ENSG00000128709.11	0.010949	0.397411
ENSG00000128710.5	0.0259992	0.0762249
ENSG00000128713.12	0.0538991	0.44403
ENSG00000128714.5	0.175789	0.784317
ENSG00000128739.19	-0.00169433	0.79456
ENSG00000128805.13	-0.0613798	0.404894
ENSG00000128815.16	-0.0150771	0.487619
ENSG00000128849.10	0.000321115	0.838268
ENSG00000128881.15	-0.0435696	0.282307
ENSG00000128928.7	-0.00255999	0.696734
ENSG00000128944.12	-0.00418056	0.969543
ENSG00000129103.16	0.00772323	0.0482239
ENSG00000129158.9	-0.0105016	0.695504
ENSG00000129167.8	-0.780227	0.250662
ENSG00000129187.13	0.00121712	0.921619
ENSG00000129204.15	-0.589901	0.310409
ENSG00000129226.12	0.0520844	0.463821
ENSG00000129295.7	0.0173501	0.56183
ENSG00000129315.8	0.00144407	0.936315
ENSG00000129347.18	0.023678	0.424647
ENSG00000129354.10	-0.00438715	0.735815
ENSG00000129355.6	-0.0151248	0.892644
ENSG00000129450.7	-0.0149092	0.877554
ENSG00000129451.10	-0.0662457	0.67684
ENSG00000129460.14	-0.0241131	0.555627
ENSG00000129480.11	-0.0899306	0.264854
ENSG00000129636.11	0.00493373	0.38067
ENSG00000129646.12	-0.973315	0.0241954
ENSG00000129691.14	0.0416	0.127463
ENSG00000129744.2	-0.0182682	0.88739
ENSG00000129749.3	-0.002941	0.963925
ENSG00000129757.11	0.00664199	0.422926
ENSG00000129910.6	-0.0559309	0.888263
ENSG00000129911.7	-0.0195429	0.430008
ENSG00000129946.9	-0.00514842	0.756568
ENSG00000129988.5	-0.000813574	0.644737
ENSG00000129991.11	-1.00421	0.411626
ENSG00000129993.13	-0.0813441	0.505274
ENSG00000130005.10	0.000156845	0.965622
ENSG00000130158.12	0.00217355	0.689441
ENSG00000130177.13	0.0203258	0.194322
ENSG00000130201.6	-0.000866691	0.920972
ENSG00000130203.8	-7.19737e-05	0.86391
ENSG00000130208.8	-0.00177523	0.562167
ENSG00000130255.11	-0.000148892	0.806326
ENSG00000130270.15	0.00903068	0.33417
ENSG00000130287.12	-1.28112	0.563001
ENSG00000130307.10	-0.0254964	0.55232
ENSG00000130309.9	0.00697011	0.0831427
ENSG00000130312.5	-0.00600034	0.493627
ENSG00000130377.12	0.0701292	0.913408
ENSG00000130402.10	0.00327886	0.0364529
ENSG00000130414.10	-0.00222451	0.740995
ENSG00000130427.2	0.00656766	0.510855
ENSG00000130475.13	0.00353816	0.917724
ENSG00000130489.11	-0.0508142	0.191011
ENSG00000130508.9	0.00234455	0.206276
ENSG00000130511.14	-0.00049567	0.973316
ENSG00000130513.6	0.000318713	0.87089
ENSG00000130517.12	0.0122096	0.0564823
ENSG00000130518.15	-0.0568582	0.485549
ENSG00000130545.14	0.00941091	0.641976
ENSG00000130561.15	-7.91742	0.225047
ENSG00000130595.15	-0.00500672	0.876205
ENSG00000130598.14	-0.382623	0.507816
ENSG00000130600.14	0.00107151	0.416534
ENSG00000130640.12	0.00720786	0.41967
ENSG00000130643.7	0.367073	0.00129401
ENSG00000130684.12	-0.215159	0.2092
ENSG00000130695.12	-0.188726	0.0867817
ENSG00000130702.12	0.000111782	0.943937
ENSG00000130703.14	-0.0140147	0.462173
ENSG00000130706.11	0.00243441	0.781332
ENSG00000130713.14	-0.00812935	0.845945
ENSG00000130714.14	0.00635411	0.776774
ENSG00000130717.11	0.0128565	0.408527
ENSG00000130720.11	0.0227494	0.575654
ENSG00000130723.16	0.00364827	0.339564
ENSG00000130762.13	-0.00313422	0.777385
ENSG00000130779.18	-0.00320794	0.578415
ENSG00000130783.12	-4.00233	0.118875
ENSG00000130787.12	0.000734193	0.92388
ENSG00000130812.9	-0.447341	0.59734
ENSG00000130827.6	-0.0103185	0.56146
ENSG00000130830.13	0.00329931	0.656633
ENSG00000130844.15	0.00120117	0.878031
ENSG00000130881.12	0.0266487	0.104819
ENSG00000130943.6	0.203963	0.678432
ENSG00000130950.12	-4.30158	0.369041
ENSG00000130957.4	-5.52745	0.431723
ENSG00000130958.10	0.0114396	0.487673
ENSG00000130985.15	0.00328135	0.270226
ENSG00000130997.15	-0.480638	0.237315
ENSG00000131015.4	0.129118	0.586772
ENSG00000131043.10	0.0389153	0.0947457
ENSG00000131050.9	-0.3222	0.649381
ENSG00000131116.10	0.00511372	0.820836
ENSG00000131127.12	-0.0610407	0.37442
ENSG00000131153.7	-0.0405213	0.610591
ENSG00000131174.4	-0.00237567	0.425654
ENSG00000131183.9	0.00673854	0.205471
ENSG00000131187.8	-0.00237071	0.914485
ENSG00000131188.10	-0.0644926	0.550124
ENSG00000131203.11	-0.00183004	0.792179
ENSG00000131263.11	0.00559609	0.564505
ENSG00000131368.6	-0.0398045	0.217319
ENSG00000131379.8	-0.501579	0.714634
ENSG00000131381.11	0.0061967	0.83908
ENSG00000131389.15	-0.000967733	0.903099
ENSG00000131398.12	0.0261499	0.260861
ENSG00000131408.12	0.00794048	0.253938
ENSG00000131409.11	0.0270096	0.851804
ENSG00000131446.14	0.00373618	0.216279
ENSG00000131459.11	0.0192257	0.0233398
ENSG00000131469.11	-0.000516745	0.573409
ENSG00000131471.5	-0.00422439	0.611748
ENSG00000131475.5	-0.0027875	0.809304
ENSG00000131584.17	-0.0400012	0.164734
ENSG00000131591.16	-0.188341	0.140709
ENSG00000131738.8	0.500283	0.830358
ENSG00000131747.13	0.0137856	0.219098
ENSG00000131748.14	0.000622844	0.977278
ENSG00000131759.16	-0.00301816	0.639904
ENSG00000131771.12	-0.889425	0.382657
ENSG00000131788.14	0.103811	0.00640549
ENSG00000131966.12	-0.0108983	0.448459
ENSG00000131969.13	0.0554605	0.824135
ENSG00000132004.11	0.0171716	0.662193
ENSG00000132010.14	-1.63808	0.212984
ENSG00000132155.10	-0.00560439	0.619519
ENSG00000132185.15	-0.186051	0.582695
ENSG00000132196.12	-0.0404375	0.315634
ENSG00000132205.9	0.014225	0.466346
ENSG00000132326.10	0.00356404	0.66493
ENSG00000132356.10	0.00142809	0.835217
ENSG00000132382.13	0.0208715	0.307197
ENSG00000132386.9	0.000788325	0.769498
ENSG00000132388.11	0.00881854	0.690232
ENSG00000132405.17	-0.0053633	0.444612
ENSG00000132406.10	-0.0171202	0.506816
ENSG00000132464.10	-0.0409474	0.280986
ENSG00000132467.3	-0.0164921	0.464425
ENSG00000132510.9	-0.000264349	0.964995
ENSG00000132535.17	-0.0126107	0.829769
ENSG00000132554.18	-0.218684	0.386465
ENSG00000132561.12	0.00119196	0.872933
ENSG00000132563.14	-0.0507442	0.654557
ENSG00000132570.13	-0.0124516	0.792859
ENSG00000132604.9	0.115725	0.0199369
ENSG00000132612.15	0.00199108	0.781582
ENSG00000132613.13	-0.0232975	0.56265
ENSG00000132670.19	0.00718438	0.49664
ENSG00000132676.14	0.0181445	0.135859
ENSG00000132677.11	-0.176473	0.632773
ENSG00000132680.9	-0.0297076	0.149543
ENSG00000132681.15	-4.18691	0.25782
ENSG00000132688.10	0.000320126	0.919467
ENSG00000132693.11	0.00421571	0.830912
ENSG00000132698.12	-0.00908537	0.692999
ENSG00000132703.3	-0.251114	0.637904
ENSG00000132744.6	0.00848431	0.417711
ENSG00000132746.13	-10.6271	0.171028
ENSG00000132749.9	-0.0258782	0.638999
ENSG00000132768.12	0.0307622	0.535126
ENSG00000132793.10	-0.0145933	0.377488
ENSG00000132832.8	-0.900606	0.545575
ENSG00000132855.4	-0.00150038	0.839627
ENSG00000132881.10	0.101285	0.4465
ENSG00000132912.11	0.0182117	0.00441245
ENSG00000132953.15	0.00178067	0.9113
ENSG00000133048.11	0.00333982	0.452015
ENSG00000133055.7	-2.6857	0.368534
ENSG00000133067.16	0.0945811	0.8149
ENSG00000133103.15	0.00587039	0.759369
ENSG00000133104.11	0.0126532	0.0471074
ENSG00000133121.19	0.0183978	0.191409
ENSG00000133135.12	0.00640695	0.0168323
ENSG00000133138.18	0.0159103	0.105996
ENSG00000133142.16	0.0122577	0.156014
ENSG00000133169.5	0.0397562	0.0468689
ENSG00000133193.11	0.091198	0.169813
ENSG00000133195.10	0.0160388	0.259973
ENSG00000133243.7	0.0145324	0.0663409
ENSG00000133246.10	-0.122107	0.29379
ENSG00000133250.12	-0.0419053	0.595098
ENSG00000133265.9	-0.00152261	0.911704
ENSG00000133275.14	0.0147327	0.453282
ENSG00000133392.15	0.00150733	0.161924
ENSG00000133393.11	0.000247905	0.986139
ENSG00000133422.11	0.0350587	0.167517
ENSG00000133466.12	0.00583743	0.643694
ENSG00000133488.13	-0.470485	0.223826
ENSG00000133519.11	0.0210808	0.888074
ENSG00000133612.17	-0.00246437	0.886539
ENSG00000133624.12	-0.183269	0.0302403
ENSG00000133627.16	-0.102789	0.345603
ENSG00000133657.13	0.00357906	0.0756611
ENSG00000133687.14	-0.00243118	0.683205
ENSG00000133706.16	0.0132989	0.0378918
ENSG00000133789.13	0.00760097	0.200632
ENSG00000133816.12	0.00581721	0.367238
ENSG00000133818.11	0.00322222	0.888447
ENSG00000133835.13	0.00338529	0.33311
ENSG00000133884.8	0.0527249	0.106805
ENSG00000133961.18	-0.00179634	0.784937
ENSG00000133962.6	-0.89339	0.280699
ENSG00000133983.13	-0.0132006	0.737299
ENSG00000134049.4	-0.00935849	0.450845
ENSG00000134056.10	0.00628989	0.610176
ENSG00000134057.13	0.060001	0.0563733
ENSG00000134058.9	0.05237	0.0206346
ENSG00000134070.4	-0.0421663	0.404284
ENSG00000134138.18	0.0193511	0.382825
ENSG00000134160.12	-0.730392	0.598329
ENSG00000134184.11	0.0172537	0.238748
ENSG00000134201.9	-0.086577	0.525747
ENSG00000134202.9	0.00862529	0.197986
ENSG00000134216.17	0.00867542	0.97057
ENSG00000134222.15	0.117175	0.316458
ENSG00000134242.14	-0.0572412	0.452606
ENSG00000134243.10	0.00740419	0.0173935
ENSG00000134245.16	0.0143019	0.00349294
ENSG00000134285.9	-0.00284325	0.859057
ENSG00000134287.8	0.00963489	0.0233327
ENSG00000134313.13	0.00684229	0.307206
ENSG00000134318.12	0.00346396	0.689217
ENSG00000134323.10	0.119372	0.599323
ENSG00000134330.17	0.00467172	0.588713
ENSG00000134333.12	0.000386084	0.151429
ENSG00000134339.7	-0.136594	0.445213
ENSG00000134375.9	0.0127231	0.265222
ENSG00000134398.11	-0.158573	0.725816
ENSG00000134419.14	7.31871e-05	0.925655
ENSG00000134460.14	-0.00622143	0.87272
ENSG00000134480.12	0.0267842	0.245339
ENSG00000134489.6	-5.535	0.217875
ENSG00000134539.15	-0.205993	0.0524393
ENSG00000134545.12	-0.749584	0.271729
ENSG00000134571.9	-4.84797	0.0666151
ENSG00000134612.10	0.175045	0.496152
ENSG00000134686.15	0.00339975	0.334262
ENSG00000134762.15	-1.84355	0.298482
ENSG00000134780.8	0.0701846	0.363826
ENSG00000134815.17	-0.041209	0.380884
ENSG00000134827.6	-1.4244	0.399683
ENSG00000134830.5	-0.0401355	0.444962
ENSG00000134853.10	-0.00349409	0.788777
ENSG00000134884.12	-0.0239245	0.119939
ENSG00000134899.16	0.0249357	0.128257
ENSG00000134962.6	0.0041018	0.813397
ENSG00000135040.14	-0.0438475	0.368285
ENSG00000135047.13	0.000249605	0.929131
ENSG00000135070.12	-0.00535898	0.593148
ENSG00000135083.13	0.0277444	0.299125
ENSG00000135093.11	0.0487202	0.167267
ENSG00000135114.11	0.00695882	0.678398
ENSG00000135144.6	-0.0993794	0.315648
ENSG00000135220.9	0.000959873	0.642627
ENSG00000135245.9	0.000925397	0.392872
ENSG00000135248.14	-6.66289	0.279683
ENSG00000135249.6	0.0100869	0.724278
ENSG00000135250.15	0.032402	0.136122
ENSG00000135253.12	0.00356487	0.733051
ENSG00000135317.11	-0.0176891	0.265835
ENSG00000135324.5	-0.02863	0.798083
ENSG00000135372.7	0.0238488	0.19672
ENSG00000135387.18	0.00584963	0.18634
ENSG00000135390.16	0.0016899	0.33971
ENSG00000135392.14	0.0323808	0.324342
ENSG00000135407.9	-0.330118	0.0444459
ENSG00000135409.9	-3.09857	0.549452
ENSG00000135436.7	-0.703056	0.317491
ENSG00000135439.10	-0.0799265	0.272151
ENSG00000135452.8	-0.000908517	0.911034
ENSG00000135457.8	0.0163923	0.579613
ENSG00000135476.10	0.0838282	0.146088
ENSG00000135477.10	0.000385222	0.999264
ENSG00000135482.5	-0.0233078	0.817612
ENSG00000135503.11	0.0155609	0.0724801
ENSG00000135506.14	0.00513982	0.00624892
ENSG00000135537.15	-0.0495136	0.557091
ENSG00000135596.16	-0.00733029	0.673872
ENSG00000135605.11	0.127395	0.395626
ENSG00000135625.7	-0.841632	0.48233
ENSG00000135632.10	0.0263209	0.075969
ENSG00000135702.13	-11.5801	0.0731274
ENSG00000135740.15	-0.254341	0.364193
ENSG00000135747.10	-3.09709	0.480624
ENSG00000135821.15	0.000327311	0.638397
ENSG00000135828.10	0.0531075	0.100283
ENSG00000135829.15	0.00828644	0.163476
ENSG00000135835.9	0.0492056	0.372603
ENSG00000135838.12	0.00288201	0.686763
ENSG00000135902.8	0.40908	0.431146
ENSG00000135916.14	0.00210862	0.142124
ENSG00000135919.11	-0.000323051	0.836976
ENSG00000135924.14	0.000669651	0.859064
ENSG00000135925.7	0.0379127	0.841434
ENSG00000135929.7	-0.00498943	0.329873
ENSG00000136040.7	0.000473253	0.970455
ENSG00000136045.10	0.0225302	0.190349
ENSG00000136059.13	0.0234579	0.662125
ENSG00000136098.15	-0.0359593	0.633304
ENSG00000136100.11	-0.0131974	0.415251
ENSG00000136114.14	0.0311456	0.492505
ENSG00000136147.15	-0.0342946	0.285267
ENSG00000136193.15	0.000478954	0.848323
ENSG00000136197.11	0.0623591	0.944572
ENSG00000136238.16	0.00410541	0.127365
ENSG00000136240.8	0.00548459	0.0528887
ENSG00000136243.15	-0.0439882	0.361717
ENSG00000136250.10	-0.00453506	0.801812
ENSG00000136271.9	-0.000884728	0.940198
ENSG00000136273.10	-0.00429394	0.915086
ENSG00000136279.17	0.000549072	0.925205
ENSG00000136286.13	-0.0005154	0.981091
ENSG00000136381.11	-0.000265367	0.979599
ENSG00000136404.14	-0.0302477	0.733767
ENSG00000136444.8	-0.00519292	0.788963
ENSG00000136463.7	-0.00331356	0.86602
ENSG00000136485.13	0.0064649	0.239445
ENSG00000136492.7	-0.11824	0.384724
ENSG00000136560.12	0.0181158	0.398707
ENSG00000136574.16	-3.05312	0.63019
ENSG00000136603.12	-0.00381711	0.63952
ENSG00000136628.16	0.0111403	0.0116013
ENSG00000136631.11	0.00927314	0.808126
ENSG00000136682.13	0.0301287	0.733943
ENSG00000136731.11	0.00402755	0.565834
ENSG00000136783.9	-0.0056474	0.782236
ENSG00000136807.10	-0.0108928	0.580408
ENSG00000136811.15	0.0187769	0.582992
ENSG00000136819.13	-0.000659232	0.961399
ENSG00000136826.13	-0.00261147	0.779325
ENSG00000136827.11	-0.000791631	0.970743
ENSG00000136828.17	-0.0353102	0.39176
ENSG00000136840.17	-0.0069035	0.731744
ENSG00000136842.12	-0.035926	0.595085
ENSG00000136856.16	-0.018365	0.463358
ENSG00000136877.13	-0.0198286	0.366809
ENSG00000136881.10	0.0845201	0.000368843
ENSG00000136883.11	-0.0014101	0.790451
ENSG00000136895.17	-0.0721427	0.289855
ENSG00000136908.16	-0.00581778	0.656358
ENSG00000136928.4	-0.493242	0.282109
ENSG00000136929.11	-0.427283	0.648205
ENSG00000136932.12	-0.0781777	0.240515
ENSG00000136982.5	0.112043	0.465507
ENSG00000137038.7	-0.00703186	0.560814
ENSG00000137054.14	0.0303583	0.218052
ENSG00000137078.7	-0.0303996	0.609007
ENSG00000137098.12	-0.0819024	0.737447
ENSG00000137100.14	7.41003e-05	0.993486
ENSG00000137135.16	-0.0138817	0.874569
ENSG00000137145.19	0.000598064	0.945512
ENSG00000137154.11	-9.91693e-05	0.65703
ENSG00000137161.15	0.0041654	0.583159
ENSG00000137171.13	0.016116	0.151338
ENSG00000137203.9	0.00539065	0.744783
ENSG00000137204.13	0.0089079	0.704254
ENSG00000137207.10	0.0172651	0.0360233
ENSG00000137218.9	-0.0227947	0.864941
ENSG00000137221.13	-0.010924	0.728421
ENSG00000137270.10	-0.667298	0.350564
ENSG00000137274.11	-0.0242587	0.401067
ENSG00000137275.12	0.0119012	0.499436
ENSG00000137288.8	-0.04727	0.279706
ENSG00000137331.11	-0.00187992	0.734238
ENSG00000137337.13	-0.0069517	0.777928
ENSG00000137338.5	-0.0404996	0.743443
ENSG00000137343.16	-0.109997	0.286076
ENSG00000137404.13	0.0113585	0.593515
ENSG00000137414.5	0.0024852	0.810249
ENSG00000137460.7	-0.131995	0.220894
ENSG00000137463.4	-0.0169873	0.531719
ENSG00000137474.18	0.0134395	0.441143
ENSG00000137486.15	-0.00729765	0.70286
ENSG00000137496.16	0.00512098	0.70231
ENSG00000137501.15	0.00367112	0.111687
ENSG00000137504.12	-0.0168326	0.2341
ENSG00000137513.8	0.0102672	0.809494
ENSG00000137547.7	-0.00301527	0.745237
ENSG00000137558.6	0.0596117	0.381154
ENSG00000137561.4	-0.690589	0.693354
ENSG00000137563.10	-0.00150777	0.924669
ENSG00000137648.15	-0.00439951	0.909678
ENSG00000137692.10	-0.0595271	0.337587
ENSG00000137709.8	-0.030347	0.85296
ENSG00000137713.14	-0.0114019	0.563125
ENSG00000137745.10	-0.0408316	0.908263
ENSG00000137752.21	-0.00631928	0.728678
ENSG00000137757.9	-0.431438	0.618358
ENSG00000137802.12	-0.0422987	0.309709
ENSG00000137815.13	0.00585667	0.682409
ENSG00000137817.15	-0.00882898	0.652643
ENSG00000137818.10	-0.000184752	0.681435
ENSG00000137825.9	-0.0111886	0.862152
ENSG00000137831.13	0.00209646	0.57533
[truncated: 5,928 more rows]

## Sheet: CG.DFI.KIRP
Gene	Coefficient	Logrank p-value
ENSG00000000460.15	0.364042	1.69997e-08
ENSG00000000938.11	-0.0105061	0.492842
ENSG00000001167.13	0.0406483	2.39914e-05
ENSG00000001617.10	0.0019719	0.49546
ENSG00000002834.16	-0.00218871	0.241818
ENSG00000003096.12	-0.00464472	0.665312
ENSG00000003393.13	0.0422411	0.00718647
ENSG00000003400.13	0.0886899	0.000326697
ENSG00000003402.18	0.000234868	0.944436
ENSG00000003989.15	-0.00246631	0.734337
ENSG00000004660.13	-0.0872654	0.0160643
ENSG00000004779.8	-0.00500564	0.452595
ENSG00000004809.12	0.618988	0.0605328
ENSG00000004838.12	-0.0446599	0.00459893
ENSG00000004975.10	-0.0298969	0.0623218
ENSG00000005059.14	-0.0173126	0.551548
ENSG00000005075.14	-0.000712747	0.90983
ENSG00000005187.10	0.00528184	0.00248241
ENSG00000005189.18	0.125439	0.126311
ENSG00000005249.11	-0.00318356	0.757175
ENSG00000005339.11	0.00708261	0.21242
ENSG00000005379.14	-0.00283034	0.706945
ENSG00000005486.15	-0.0151883	0.000753431
ENSG00000005801.15	0.0457418	0.0136669
ENSG00000005961.16	0.109847	0.283411
ENSG00000005981.11	-0.181022	0.617345
ENSG00000006047.11	-0.0306385	0.327392
ENSG00000006062.12	0.0115203	0.182548
ENSG00000006071.10	-0.224363	0.550574
ENSG00000006210.6	-0.00650572	0.0129336
ENSG00000006282.18	-0.000451033	0.876655
ENSG00000006283.16	0.472827	0.411876
ENSG00000006327.12	-0.00446746	0.00228015
ENSG00000006534.14	-0.00423206	0.323618
ENSG00000006607.12	0.0209294	0.2237
ENSG00000006704.9	-0.0240413	0.0559189
ENSG00000006744.17	-0.0180691	0.0023831
ENSG00000006756.14	-0.00112484	0.750457
ENSG00000006757.10	0.0163366	0.138934
ENSG00000007038.9	0.0229114	0.767124
ENSG00000007047.13	0.000471867	0.978993
ENSG00000007080.9	0.00165508	0.804552
ENSG00000007168.11	-0.00856803	0.0557393
ENSG00000007216.13	0.000314239	0.950277
ENSG00000007237.17	0.00968295	0.443463
ENSG00000007264.12	-0.0130818	0.719674
ENSG00000007312.11	0.087337	5.55418e-06
ENSG00000007314.10	-0.0143788	0.940422
ENSG00000007341.17	0.0199982	0.83447
ENSG00000007392.15	-0.00635384	0.131358
ENSG00000007402.10	-0.233307	0.120098
ENSG00000007516.12	-0.000246921	0.982055
ENSG00000007541.13	-0.0122546	0.00381234
ENSG00000007933.11	0.0297499	0.278151
ENSG00000008056.11	-0.0419781	0.656081
ENSG00000008130.14	-0.0240543	0.120464
ENSG00000008283.14	-0.0092002	0.116181
ENSG00000008516.15	-0.0133688	0.935752
ENSG00000008517.15	-0.000803665	0.255956
ENSG00000008853.15	0.00410087	0.0454754
ENSG00000009724.15	-0.209167	0.346108
ENSG00000010256.9	-0.00429079	0.00638785
ENSG00000010319.5	0.00260888	0.905193
ENSG00000010322.14	-0.011455	0.153441
ENSG00000010327.9	0.0015448	0.527387
ENSG00000010379.14	-0.00253504	0.403874
ENSG00000010539.10	0.120566	0.192723
ENSG00000010610.8	0.000779396	0.795349
ENSG00000010626.13	-0.0556687	0.0052824
ENSG00000010704.17	-0.00801458	0.754836
ENSG00000011083.7	-4.09019	0.0500689
ENSG00000011143.15	-0.0341386	0.164138
ENSG00000011304.15	0.00487763	0.280434
ENSG00000011376.8	-0.0220129	0.0827313
ENSG00000011422.10	-0.00766593	0.551256
ENSG00000011451.16	0.00765782	0.549309
ENSG00000011485.13	-0.0249347	0.223045
ENSG00000011523.12	0.0122494	0.512221
ENSG00000012061.14	-0.0117793	0.397447
ENSG00000012124.13	0.0397896	0.00949611
ENSG00000012211.11	0.0525189	0.0130112
ENSG00000012504.12	0.00102139	0.904316
ENSG00000012817.14	0.0202759	0.00108228
ENSG00000012983.10	0.0326325	0.112678
ENSG00000013275.6	-0.000784956	0.918918
ENSG00000013306.14	-0.00202783	0.355361
ENSG00000013441.14	-0.00152247	0.690174
ENSG00000013561.16	0.0018167	0.795751
ENSG00000013588.5	0.000889353	0.599331
ENSG00000014138.7	0.126224	0.000173062
ENSG00000014216.14	-0.00533734	0.00307739
ENSG00000014824.12	-0.00951596	0.191877
ENSG00000015285.9	0.0139748	0.0869229
ENSG00000015520.13	0.042969	2.03622e-07
ENSG00000015676.16	-0.0237673	0.000191383
ENSG00000016402.11	0.0560408	0.00035173
ENSG00000016864.15	-0.0188138	0.176968
ENSG00000017483.13	0.0203107	0.165881
ENSG00000018280.15	-0.00698378	0.563593
ENSG00000018408.13	0.00143213	0.649434
ENSG00000018625.13	0.074221	0.433333
ENSG00000018699.10	0.110434	0.00348738
ENSG00000019102.10	0.00780132	0.0216182
ENSG00000019505.6	-0.00296004	0.359827
ENSG00000019995.6	0.033749	0.404663
ENSG00000020181.16	0.0270259	0.0178371
ENSG00000020426.9	0.07463	0.153542
ENSG00000020633.17	0.0150107	0.0272371
ENSG00000021300.12	-0.0283019	0.0238279
ENSG00000021461.15	1.83624	0.0700178
ENSG00000021488.11	0.00801542	0.392614
ENSG00000021762.18	-0.0175546	0.279355
ENSG00000021776.9	0.0105854	0.432614
ENSG00000022277.11	-0.00409643	0.536356
ENSG00000022556.14	0.00910423	0.00436798
ENSG00000023330.13	-0.0074101	0.209879
ENSG00000023445.12	0.00142812	0.393621
ENSG00000023572.7	0.0953292	0.185404
ENSG00000023608.4	0.1243	0.00453909
ENSG00000023892.10	0.0223055	0.00769991
ENSG00000023902.12	0.00786334	0.0358648
ENSG00000023909.8	0.011677	0.17908
ENSG00000024422.10	-0.00967662	0.00248634
ENSG00000025039.13	-8.15186e-06	0.998063
ENSG00000025293.14	0.0191194	0.188748
ENSG00000025800.12	-0.00169575	0.847211
ENSG00000026950.15	0.00446804	0.257858
ENSG00000027847.12	-0.0168148	0.21919
ENSG00000028277.19	0.0177184	0.209247
ENSG00000029153.13	0.0268527	0.215827
ENSG00000029363.14	0.0133725	0.107005
ENSG00000029534.18	-0.0166156	0.27144
ENSG00000029559.6	0.387669	0.136319
ENSG00000029993.13	-0.00367121	0.622911
ENSG00000030110.11	0.0101823	0.494413
ENSG00000031081.9	-0.00463753	0.736421
ENSG00000033050.6	-0.00247679	0.807406
ENSG00000033100.13	-0.000622064	0.93008
ENSG00000033327.11	-0.0265221	0.116971
ENSG00000033867.15	-0.0124934	0.304882
ENSG00000034510.5	-0.00010223	0.657477
ENSG00000035141.6	-0.00290765	0.874283
ENSG00000035862.11	-0.000293492	0.756486
ENSG00000036054.11	-0.00508636	0.797781
ENSG00000036448.8	-0.0381831	0.507274
ENSG00000036530.7	-0.210233	0.405336
ENSG00000037280.14	0.00523377	0.69099
ENSG00000037757.12	0.00476264	0.730791
ENSG00000037965.5	-0.0557044	0.290508
ENSG00000038358.13	-0.00869266	0.559544
ENSG00000038532.13	-0.0350718	0.0119189
ENSG00000039068.17	0.000476563	0.703982
ENSG00000040199.17	-0.0529129	0.0909642
ENSG00000040633.11	-0.0318038	0.0428861
ENSG00000041357.14	0.0116717	0.000384173
ENSG00000041802.9	0.0165427	0.248774
ENSG00000041982.13	-0.000397434	0.36932
ENSG00000042062.10	-0.0243272	0.220821
ENSG00000042286.13	-0.014295	0.316222
ENSG00000042753.10	0.00158264	0.816448
ENSG00000043143.19	0.00413655	0.503073
ENSG00000044090.7	0.000412753	0.952519
ENSG00000044446.10	0.00352393	0.763987
ENSG00000047457.12	-0.00128542	0.650514
ENSG00000047597.5	0.241005	0.000253413
ENSG00000047617.13	-0.100577	0.737805
ENSG00000047634.13	0.00547641	0.791005
ENSG00000047849.20	-0.00699622	0.00159378
ENSG00000048544.5	0.00503988	0.0772281
ENSG00000049192.13	1.04491	0.00704273
ENSG00000049245.11	-0.0119691	0.104604
ENSG00000049246.13	-0.0211477	0.244869
ENSG00000049656.12	0.00226178	0.367912
ENSG00000049769.11	0.0317099	0.574138
ENSG00000050405.12	-0.00343744	0.505108
ENSG00000050555.16	0.00203649	0.910121
ENSG00000050748.16	-0.00358349	0.837961
ENSG00000050767.14	-0.00345588	0.507971
ENSG00000051382.7	-0.00225542	0.814409
ENSG00000051825.13	0.0735112	0.00164723
ENSG00000052344.14	-0.00370574	0.289094
ENSG00000053254.14	-0.000618813	0.943196
ENSG00000053438.8	0.103875	0.660016
ENSG00000053501.11	0.015196	0.1674
ENSG00000053900.9	0.00849209	0.51276
ENSG00000054118.12	-0.00021189	0.975375
ENSG00000054179.10	-0.0211354	0.0477352
ENSG00000054219.10	0.0123152	0.36522
ENSG00000054392.11	-0.00745602	0.681169
ENSG00000054598.6	0.00143683	0.677528
ENSG00000054938.14	-0.00496274	0.878861
ENSG00000054965.9	-0.0183685	0.0889515
ENSG00000054967.11	0.0128351	0.771431
ENSG00000054983.15	-0.0109512	0.505764
ENSG00000055211.11	-0.000843177	0.872579
ENSG00000055483.18	0.0152095	0.240444
ENSG00000055917.14	0.00530008	0.311047
ENSG00000055955.14	-0.0481444	0.941355
ENSG00000055957.9	-0.450451	0.473089
ENSG00000056558.9	0.0028911	0.782051
ENSG00000056586.14	-0.00731411	0.667365
ENSG00000057252.11	0.00540557	0.298278
ENSG00000057468.6	0.767726	0.393641
ENSG00000057593.12	0.0729949	0.318389
ENSG00000058453.15	0.00826646	0.578165
ENSG00000058600.14	0.000757761	0.970688
ENSG00000058673.14	0.0180537	0.0114044
ENSG00000058729.9	0.109108	0.0152402
ENSG00000059145.17	-0.0151574	0.730864
ENSG00000059573.7	0.00161829	0.801731
ENSG00000059915.15	-0.0387028	0.751743
ENSG00000060140.7	0.103623	0.0728649
ENSG00000060558.3	0.011561	0.307106
ENSG00000060642.9	-0.0769694	0.00739465
ENSG00000061273.16	-0.00131622	0.805745
ENSG00000062096.13	0.0434908	0.153112
ENSG00000062524.14	-0.0145291	0.781462
ENSG00000062822.11	0.00898593	0.785306
ENSG00000063015.18	-0.97884	0.514232
ENSG00000063046.16	0.0006631	0.637877
ENSG00000063127.14	-0.1483	0.0297884
ENSG00000063241.6	-0.00548701	0.301608
ENSG00000063244.11	0.0133717	0.0420528
ENSG00000064012.20	0.0470367	0.00288483
ENSG00000064201.14	0.164713	0.0101751
ENSG00000064313.10	0.0688758	0.00592846
ENSG00000064545.13	0.00612928	0.670279
ENSG00000064547.12	0.0214024	0.194124
ENSG00000064601.15	-0.000213453	0.784175
ENSG00000064652.9	-0.0372107	0.270519
ENSG00000064666.13	0.0030426	0.33871
ENSG00000064687.11	-0.023024	0.16785
ENSG00000064886.12	0.00748794	0.11924
ENSG00000064961.17	-0.0273516	0.00667294
ENSG00000064999.13	0.00231277	0.573045
ENSG00000065029.13	-0.0189155	0.310898
ENSG00000065060.15	0.0050142	0.806139
ENSG00000065268.9	-0.0212415	0.060947
[truncated: 7,670 more rows]

## Sheet: CG.DFI.LIHC
Gene	Coefficient	Logrank p-value
[truncated: 7,003 more rows]

[truncated: 32 more sheets: CG.DFI.LUAD, CG.DFI.LUSC, CG.DFI.PRAD, CG.DFI.STAD, CG.DFI.THCA, CG.DFI.UCEC, CG.OS.BLCA, CG.OS.BRCA, CG.OS.COAD, CG.OS.HNSC, CG.OS.KIRC, CG.OS.KIRP, CG.OS.LIHC, CG.OS.LUAD, CG.OS.LUSC, CG.OS.PRAD, CG.OS.STAD, CG.OS.THCA, CG.OS.UCEC, CG.PFI.BLCA …]
