# Supplementary material for: Characterization of bidirectional gene pairs in The Cancer Genome Atlas (TCGA) dataset
Source: PeerJ. 2019 Jun 17;7:e7107. doi: 10.7717/peerj.7107 (PMC6585903; doi:10.7717/peerj.7107)
Supplement: Supplemental Information 16 [file peerj-07-7107-s016.xlsx]

## Sheet: BG.DFI.BLCA
Gene	Coefficient1	Coefficient2	Logrank p-value
ENSG00000000460.15.vs.ENSG00000239494.2	-0.00800793	2.67618	0.0473471
ENSG00000000938.11.vs.ENSG00000126705.12	-0.0389599	-0.00110794	0.293199
ENSG00000001617.10.vs.ENSG00000114349.8	0.000555089	0.480971	0.615961
ENSG00000003096.12.vs.ENSG00000279587.1	0.119011	-11.7001	0.123872
ENSG00000003393.13.vs.ENSG00000082126.16	0.0142697	2.03069	0.00206608
ENSG00000003400.13.vs.ENSG00000064012.20	-0.0232993	0.0169523	0.346854
ENSG00000003402.18.vs.ENSG00000003400.13	5.95761e-05	-0.0137255	0.599003
ENSG00000003989.15.vs.ENSG00000104213.11	0.000739934	0.00249275	0.976122
ENSG00000004838.12.vs.ENSG00000126062.3	0.0128295	-0.00341509	0.93197
ENSG00000004975.10.vs.ENSG00000132535.17	-0.00875067	4.04486e-05	0.819303
ENSG00000004975.10.vs.ENSG00000175826.10	0.0102715	-0.0156525	0.0776821
ENSG00000004975.10.vs.ENSG00000199053.2	-0.00680024	-1.11988	0.720082
ENSG00000005059.14.vs.ENSG00000249965.2	0.00187417	4.92292	0.356499
ENSG00000005059.14.vs.ENSG00000273447.1	0.00100368	0.0213678	0.991252
ENSG00000005075.14.vs.ENSG00000170667.13	-0.00699694	-0.573586	0.606021
ENSG00000005189.18.vs.ENSG00000005187.10	0.0324541	0.0134247	0.188897
ENSG00000005249.11.vs.ENSG00000105856.12	0.00394657	0.00395916	0.796126
ENSG00000005379.14.vs.ENSG00000265206.3	0.00185903	-0.122487	0.484443
ENSG00000005486.15.vs.ENSG00000219039.2	-0.000835885	-1.25928	0.866579
ENSG00000005961.16.vs.ENSG00000161682.13	0.0237809	-0.0041442	0.960804
ENSG00000005961.16.vs.ENSG00000186566.10	0.0362421	0.0166244	0.262099
ENSG00000006282.18.vs.ENSG00000006283.16	0.00411365	0.0804612	0.402901
ENSG00000006283.16.vs.ENSG00000108846.14	0.153426	0.00168135	0.332926
ENSG00000006607.12.vs.ENSG00000168385.16	0.0144656	-0.00117287	0.28874
ENSG00000007038.9.vs.ENSG00000162078.10	0.0111335	-0.00633657	0.356155
ENSG00000007047.13.vs.ENSG00000104859.13	-0.0112071	-0.0191981	0.0372569
ENSG00000007216.13.vs.ENSG00000109101.6	0.0310592	0.0195956	0.00197947
ENSG00000007216.13.vs.ENSG00000263266.2	0.0305302	-0.146503	0.0559698
ENSG00000007237.17.vs.ENSG00000109047.7	-0.00793032	1.62517	0.830918
ENSG00000007264.12.vs.ENSG00000105278.9	0.00581845	-0.242512	0.641392
ENSG00000007312.11.vs.ENSG00000007314.10	-0.00785986	-0.0823739	0.597075
ENSG00000007341.17.vs.ENSG00000273483.1	-0.0102726	0.372079	0.866247
ENSG00000007516.12.vs.ENSG00000219274.1	-0.0145246	-0.346293	0.398449
ENSG00000008056.11.vs.ENSG00000126759.11	-0.0823858	-0.0796409	0.428211
ENSG00000008516.15.vs.ENSG00000205890.3	-0.171135	-0.012236	0.166599
ENSG00000008517.15.vs.ENSG00000008516.15	-0.00162728	-0.131058	0.133768
ENSG00000009724.15.vs.ENSG00000116649.8	0.263638	-0.00110107	0.204172
ENSG00000010256.9.vs.ENSG00000183396.3	-0.00230108	1.38617	0.549284
ENSG00000010327.9.vs.ENSG00000010322.14	-0.00396633	-0.00265718	0.425856
ENSG00000010379.14.vs.ENSG00000111181.11	0.664854	0.0242851	0.00582161
ENSG00000010610.8.vs.ENSG00000110811.18	-0.0161528	0.0054331	0.0554133
ENSG00000010626.13.vs.ENSG00000111669.13	-0.0427307	-0.00113653	0.155054
ENSG00000010704.17.vs.ENSG00000197061.4	0.0155179	0.022519	0.0281129
ENSG00000011143.15.vs.ENSG00000278627.1	-0.0157245	1.36685	0.422211
ENSG00000011451.16.vs.ENSG00000105122.11	-0.00640353	-0.0299359	0.213287
ENSG00000011523.12.vs.ENSG00000232613.5	0.00345226	-1.32707	0.629881
ENSG00000012061.14.vs.ENSG00000125744.10	-0.00421886	-0.028285	0.420735
ENSG00000012211.11.vs.ENSG00000279422.1	0.00168903	-1.0061	0.840289
ENSG00000012504.12.vs.ENSG00000139354.9	0.0200182	-0.0153811	0.529825
ENSG00000013306.14.vs.ENSG00000267750.4	0.00068348	0.173999	0.513308
ENSG00000013561.16.vs.ENSG00000271871.1	0.0194406	1.382	0.0262408
ENSG00000013588.5.vs.ENSG00000247498.8	-0.000596705	0.0368604	0.412096
ENSG00000015285.9.vs.ENSG00000101945.15	-0.0366368	0.0154654	0.225904
ENSG00000015676.16.vs.ENSG00000279853.1	-0.00573873	1.06008	0.672521
ENSG00000016864.15.vs.ENSG00000114904.11	-0.00434684	0.00456944	0.843263
ENSG00000018280.15.vs.ENSG00000199121.3	-0.0195875	4.8841	0.114983
ENSG00000018408.13.vs.ENSG00000114744.7	0.00133063	0.019618	0.269426
ENSG00000018625.13.vs.ENSG00000132681.15	-0.0164917	-0.0101125	0.607682
ENSG00000019102.10.vs.ENSG00000255045.1	-0.00118181	0.236903	0.743753
ENSG00000019995.6.vs.ENSG00000273599.1	0.0469509	-0.134813	0.211972
ENSG00000021762.18.vs.ENSG00000236710.1	0.0138586	-2.86377	0.519035
ENSG00000021776.9.vs.ENSG00000259751.1	-0.00420098	5.79574	0.18137
ENSG00000022277.11.vs.ENSG00000087589.15	-0.00538294	-0.261825	0.139906
ENSG00000022277.11.vs.ENSG00000280387.1	-0.00743737	-0.242241	0.492588
ENSG00000022556.14.vs.ENSG00000267265.4	-0.00077121	0.0307154	0.943706
ENSG00000023330.13.vs.ENSG00000242849.2	-0.000937605	-2.15808	0.751198
ENSG00000023572.7.vs.ENSG00000272579.1	0.00497298	0.0139191	0.948852
ENSG00000023608.4.vs.ENSG00000279633.1	-0.00330976	1.2878	0.353857
ENSG00000024422.10.vs.ENSG00000105373.17	0.00099442	-0.0030643	0.0757631
ENSG00000027847.12.vs.ENSG00000184840.10	-0.0165786	0.000614183	0.57895
ENSG00000029993.13.vs.ENSG00000230508.1	-0.00141087	-1.04712	0.545098
ENSG00000031081.9.vs.ENSG00000240254.1	0.0170307	1.38071	0.0560077
ENSG00000033867.15.vs.ENSG00000163491.15	0.00339475	-0.0316747	0.940316
ENSG00000034510.5.vs.ENSG00000213399.3	-0.000140963	-1.10272	0.383525
ENSG00000035862.11.vs.ENSG00000267355.2	0.000490915	0.268038	0.351507
ENSG00000037280.14.vs.ENSG00000161055.3	0.0302419	-0.0664543	0.0950264
ENSG00000038532.13.vs.ENSG00000280153.1	-0.00268463	-0.0663475	0.345838
ENSG00000039068.17.vs.ENSG00000103047.6	0.000321505	0.00359784	0.684938
ENSG00000039987.5.vs.ENSG00000198356.10	-0.10772	-0.018289	0.125808
ENSG00000040633.11.vs.ENSG00000175826.10	-0.0096837	-0.0105398	0.0749379
ENSG00000041357.14.vs.ENSG00000279373.1	-0.00521652	0.678253	0.220212
ENSG00000042062.10.vs.ENSG00000232043.1	0.0186259	0.37959	0.138159
ENSG00000044090.7.vs.ENSG00000240625.3	-0.0106299	2.53871	0.338808
ENSG00000044090.7.vs.ENSG00000272223.1	-0.00881843	-0.0412637	0.497274
ENSG00000044446.10.vs.ENSG00000173698.16	0.00372138	0.0184895	0.365774
ENSG00000048544.5.vs.ENSG00000124496.11	-0.00513282	-0.00648121	0.554981
ENSG00000049245.11.vs.ENSG00000049246.13	-0.00323143	0.0162093	0.394358
ENSG00000050405.12.vs.ENSG00000139624.11	3.44164e-05	0.00852677	0.739795
ENSG00000050555.16.vs.ENSG00000126878.11	-0.00412076	-0.000906277	0.969211
ENSG00000051382.7.vs.ENSG00000174715.7	0.0209088	0.594007	0.193636
ENSG00000053438.8.vs.ENSG00000235044.1	-0.0195965	1.3139	0.285679
ENSG00000053501.11.vs.ENSG00000099330.7	0.0180341	-0.0202157	0.453989
ENSG00000054118.12.vs.ENSG00000214193.8	-1.09311e-05	0.0058756	0.965222
ENSG00000054179.10.vs.ENSG00000186193.8	0.0280391	-0.00632825	0.24348
ENSG00000054967.11.vs.ENSG00000110237.3	-0.0333544	0.00743257	0.342495
ENSG00000054967.11.vs.ENSG00000256448.4	-0.0334842	1.10243	0.492616
ENSG00000055211.11.vs.ENSG00000202343.1	0.00446158	1.70439	0.235527
ENSG00000055211.11.vs.ENSG00000220848.4	0.0106325	-0.149577	0.585662
ENSG00000055483.18.vs.ENSG00000267355.2	0.00701665	0.234778	0.409234
ENSG00000055917.14.vs.ENSG00000235411.1	0.00387941	2.36282	0.362434
ENSG00000055957.9.vs.ENSG00000162267.11	-1.07197	0.0969152	0.652535
ENSG00000056558.9.vs.ENSG00000119403.12	-0.0253245	0.00845718	0.29305
ENSG00000057468.6.vs.ENSG00000137955.14	0.192739	-0.0293134	0.25028
ENSG00000057593.12.vs.ENSG00000126217.19	0.102109	-9.88305e-05	0.00211446
ENSG00000057593.12.vs.ENSG00000126218.10	0.155496	-0.130527	0.000683312
ENSG00000058453.15.vs.ENSG00000226526.1	-0.0136802	0.644684	0.450902
ENSG00000058600.14.vs.ENSG00000103319.10	0.00699553	0.00527795	0.315738
ENSG00000058729.9.vs.ENSG00000248758.1	0.0293618	3.63641	0.000435079
ENSG00000059145.17.vs.ENSG00000260425.1	0.0132636	-0.993663	0.851962
ENSG00000059573.7.vs.ENSG00000119977.19	0.00313728	0.000240445	0.87894
ENSG00000060558.3.vs.ENSG00000125910.5	-0.00165702	-0.0790467	0.332323
ENSG00000060558.3.vs.ENSG00000266944.1	-0.00240124	0.929052	0.27986
ENSG00000061273.16.vs.ENSG00000111424.9	-0.00521495	0.00262444	0.424697
ENSG00000062524.14.vs.ENSG00000103932.10	-0.0315729	-0.00550778	0.743652
ENSG00000063015.18.vs.ENSG00000109118.12	-0.00647805	-0.000945467	0.992715
ENSG00000064313.10.vs.ENSG00000279347.1	0.00972733	0.688049	0.435832
ENSG00000064547.12.vs.ENSG00000105717.12	-0.000825488	-0.0395455	0.632705
ENSG00000064601.15.vs.ENSG00000168612.4	-0.000116883	-0.0160849	0.799916
ENSG00000064687.11.vs.ENSG00000064666.13	2.64445e-05	-0.00351055	0.0889244
ENSG00000064999.13.vs.ENSG00000065060.15	-0.0026358	0.0298746	0.0201898
ENSG00000065029.13.vs.ENSG00000023892.10	0.00243097	-0.0163495	0.325364
ENSG00000065029.13.vs.ENSG00000146197.8	-0.00395838	-0.0185481	0.815017
ENSG00000065371.16.vs.ENSG00000175455.13	0.641328	0.0100945	0.0606207
ENSG00000065717.13.vs.ENSG00000104964.13	0.00351109	-0.00199897	0.178291
ENSG00000065978.16.vs.ENSG00000171960.9	-7.07776e-05	-0.0153703	0.426312
ENSG00000066117.13.vs.ENSG00000110881.10	0.00237292	0.0287341	0.647144
ENSG00000066117.13.vs.ENSG00000167588.11	0.00320921	0.00829402	0.407725
ENSG00000066336.10.vs.ENSG00000134571.9	-0.0211132	0.54765	0.119139
ENSG00000066336.10.vs.ENSG00000255197.4	-0.018941	0.0105489	0.169874
ENSG00000067334.12.vs.ENSG00000023909.8	-0.0177783	-0.00160939	0.151373
ENSG00000067596.9.vs.ENSG00000237888.1	0.00741288	-10.351	0.0887351
ENSG00000067840.11.vs.ENSG00000067829.17	0.00960577	-0.00936246	0.460331
ENSG00000067900.6.vs.ENSG00000244527.1	0.00734038	-3.83476	0.463954
ENSG00000068001.12.vs.ENSG00000114378.15	-0.0074346	-0.00091518	0.7046
ENSG00000068137.13.vs.ENSG00000184451.5	-0.000480298	-0.392988	0.433493
ENSG00000068137.13.vs.ENSG00000267765.1	-0.00365305	3.35737	0.286383
ENSG00000068308.12.vs.ENSG00000102096.9	0.00675571	-0.0476101	0.124047
ENSG00000068724.14.vs.ENSG00000228925.1	-0.00704717	0.078803	0.578627
ENSG00000069956.10.vs.ENSG00000138594.11	0.00232896	-0.00187637	0.895903
ENSG00000070444.13.vs.ENSG00000127804.11	-0.00684357	-0.0189575	0.489682
ENSG00000070444.13.vs.ENSG00000263345.1	-0.0130806	0.0322592	0.734334
ENSG00000070476.13.vs.ENSG00000159650.7	0.0202169	-1.76913	0.309363
ENSG00000070476.13.vs.ENSG00000279328.1	0.0177421	0.194739	0.393549
ENSG00000070785.15.vs.ENSG00000226499.1	-0.0292051	-1.51282	0.231298
ENSG00000070785.15.vs.ENSG00000232369.1	-0.0284342	0.239298	0.421881
ENSG00000070785.15.vs.ENSG00000268949.1	-0.0280622	0.0962948	0.421142
ENSG00000071655.16.vs.ENSG00000239367.2	-0.00250216	3.1366	0.420073
ENSG00000071859.13.vs.ENSG00000130827.6	-0.00424295	0.0047843	0.444501
ENSG00000072062.12.vs.ENSG00000188032.8	-0.00796761	1.41271	0.134793
ENSG00000072195.13.vs.ENSG00000280323.1	0.00705273	-0.235709	0.630789
ENSG00000072832.13.vs.ENSG00000181215.11	0.00179308	-1.73392	0.660593
ENSG00000072858.9.vs.ENSG00000241529.3	-0.00897884	0.449703	0.0129298
ENSG00000073008.13.vs.ENSG00000216588.7	-0.00535399	1.35587	0.441784
ENSG00000073150.12.vs.ENSG00000073146.14	0.00608747	0.0342422	0.859831
ENSG00000073150.12.vs.ENSG00000170638.8	0.010581	-0.0124789	0.0971704
ENSG00000073670.12.vs.ENSG00000161692.16	-0.130637	0.041993	0.263607
ENSG00000073737.15.vs.ENSG00000235321.1	0.00198933	-3.10453	0.844405
ENSG00000074266.16.vs.ENSG00000254783.1	-0.0240061	-0.477162	0.356218
ENSG00000074319.11.vs.ENSG00000151116.15	-0.0240461	0.0319988	0.165301
ENSG00000074660.14.vs.ENSG00000167703.13	-0.0250158	-0.00494122	0.516493
ENSG00000076067.10.vs.ENSG00000257576.1	0.00739591	0.0663673	0.825638
ENSG00000076108.10.vs.ENSG00000207031.1	0.00228331	-0.948885	0.865973
ENSG00000076248.9.vs.ENSG00000076555.14	-0.0133949	-0.0212915	0.271093
ENSG00000076248.9.vs.ENSG00000135093.11	-0.0159522	0.0417321	0.233704
ENSG00000076258.8.vs.ENSG00000225704.2	0.115225	0.271474	0.02973
ENSG00000076321.9.vs.ENSG00000200674.1	0.0413341	5.86853	0.00421633
ENSG00000076650.5.vs.ENSG00000166359.9	-0.0123379	0.412793	0.00521358
ENSG00000076864.18.vs.ENSG00000090686.14	-0.000376056	-0.0108315	0.715134
ENSG00000077147.13.vs.ENSG00000095587.8	0.000458957	0.00613135	0.966143
ENSG00000077147.13.vs.ENSG00000155629.13	0.000178006	-0.0127829	0.567224
ENSG00000077454.14.vs.ENSG00000224729.5	-0.0118527	-0.110945	0.914917
ENSG00000077713.17.vs.ENSG00000252147.1	0.00827638	0.149086	0.757284
ENSG00000077782.18.vs.ENSG00000254981.1	0.00473467	-6.70507	0.549649
ENSG00000077782.18.vs.ENSG00000272159.1	0.0027526	-1.33135	0.862874
ENSG00000078081.6.vs.ENSG00000078070.10	0.0042109	0.00101998	0.658827
ENSG00000078747.11.vs.ENSG00000125971.15	0.00988146	-0.00107378	0.161149
ENSG00000079246.14.vs.ENSG00000279348.1	-0.00111481	0.326213	0.0152727
ENSG00000079337.14.vs.ENSG00000280054.1	-0.0203706	2.10123	0.00283273
ENSG00000079393.19.vs.ENSG00000237882.1	0.257579	-3.27414	0.0973709
ENSG00000079432.6.vs.ENSG00000188368.8	-0.0014182	0.0688103	0.592454
ENSG00000079459.11.vs.ENSG00000227203.3	-0.0020678	2.21492	0.445701
ENSG00000079616.11.vs.ENSG00000174992.7	0.000515089	-0.100786	0.952806
ENSG00000079805.15.vs.ENSG00000267544.1	-0.0033123	-1.29134	0.138106
ENSG00000079999.12.vs.ENSG00000180739.13	-0.00482591	0.00319258	0.706513
ENSG00000080644.14.vs.ENSG00000117971.10	-0.136282	0.0709899	0.710798
ENSG00000080644.14.vs.ENSG00000261762.1	-0.0951636	-0.0983727	0.635824
ENSG00000080854.13.vs.ENSG00000280237.1	0.454932	-0.129594	0.186964
ENSG00000081051.6.vs.ENSG00000163631.15	0.159471	-0.0337027	0.343373
ENSG00000081154.10.vs.ENSG00000174173.6	0.00102761	-0.00592561	0.953447
ENSG00000081181.6.vs.ENSG00000259502.1	-0.00251689	-0.0141002	0.984641
ENSG00000081692.11.vs.ENSG00000230005.2	-0.00659007	3.11945	0.00522975
ENSG00000081818.3.vs.ENSG00000113209.8	0.0134684	-0.0206926	0.78817
ENSG00000082126.16.vs.ENSG00000155755.17	2.18028	-0.00627199	0.00246912
ENSG00000082781.10.vs.ENSG00000173702.6	-0.000177593	0.00295583	0.425812
ENSG00000083099.9.vs.ENSG00000112159.10	0.0180811	0.00814227	0.24029
ENSG00000083223.16.vs.ENSG00000135070.12	0.0042471	0.014189	0.477926
ENSG00000083444.15.vs.ENSG00000116688.15	0.000116914	-0.00421194	0.526723
ENSG00000083807.8.vs.ENSG00000119574.11	-0.00525565	-0.0252179	0.669971
ENSG00000083812.10.vs.ENSG00000249471.6	0.055471	-0.0494072	0.755647
ENSG00000083844.9.vs.ENSG00000105146.11	0.0144166	0.0200558	0.454766
ENSG00000083845.7.vs.ENSG00000171574.16	-0.00162738	0.0520479	0.146144
ENSG00000083845.7.vs.ENSG00000269855.2	-0.0013237	-0.244771	0.19418
ENSG00000084652.14.vs.ENSG00000025800.12	0.00773124	-1.20502e-05	0.387031
ENSG00000084652.14.vs.ENSG00000160050.13	0.00749297	-0.0225638	0.245863
ENSG00000084693.14.vs.ENSG00000138080.12	-0.0110066	-0.00084397	0.647677
ENSG00000085063.13.vs.ENSG00000255202.1	0.000330146	0.235936	0.303154
ENSG00000085644.12.vs.ENSG00000228146.5	0.000680042	0.842141	0.0127233
ENSG00000085831.14.vs.ENSG00000085832.15	0.000365911	-0.00898059	0.62276
ENSG00000085978.20.vs.ENSG00000263941.2	-0.0272533	-7.83283	0.183295
ENSG00000086015.19.vs.ENSG00000236111.5	-0.0070756	-3.70004	0.35278
ENSG00000086159.11.vs.ENSG00000167580.6	-0.0413512	0.243767	0.973251
ENSG00000086506.2.vs.ENSG00000188536.11	0.415188	-0.0264076	0.648037
ENSG00000086730.15.vs.ENSG00000207741.1	-0.0347005	1.00737	0.0626313
ENSG00000086848.13.vs.ENSG00000255561.5	0.152894	-0.139676	0.089299
ENSG00000086967.9.vs.ENSG00000269404.5	-0.124351	-0.00339413	0.594948
ENSG00000087077.10.vs.ENSG00000087087.17	-0.00291444	-0.000817687	0.691697
ENSG00000087088.18.vs.ENSG00000087086.12	-0.0172697	2.75733e-05	0.0290674
ENSG00000087088.18.vs.ENSG00000104808.6	-0.0187746	0.0480245	0.0241465
ENSG00000087111.19.vs.ENSG00000109107.12	0.00488219	-0.00405927	0.516246
ENSG00000087245.11.vs.ENSG00000087253.10	-0.000118052	0.000185317	0.948387
ENSG00000087266.14.vs.ENSG00000087274.15	-0.00528528	-0.00217269	0.465806
ENSG00000087338.4.vs.ENSG00000196975.13	-0.00449179	-0.00269103	0.527998
ENSG00000087502.16.vs.ENSG00000273680.1	-0.00410757	0.184838	0.0321784
ENSG00000087502.16.vs.ENSG00000274315.1	-0.00404576	0.446751	0.0549684
ENSG00000088247.14.vs.ENSG00000181240.12	-0.00164942	0.183714	0.401673
ENSG00000088256.7.vs.ENSG00000266944.1	-0.00416311	1.01169	0.347175
ENSG00000088280.17.vs.ENSG00000204219.8	0.0153494	-0.00218171	0.103997
ENSG00000088367.19.vs.ENSG00000131043.10	0.0029773	-0.0034399	0.532476
ENSG00000088826.16.vs.ENSG00000230176.2	-0.0157818	-2.84722	0.519721
ENSG00000088827.11.vs.ENSG00000149451.16	-0.0179275	-0.000858311	0.355803
ENSG00000088899.13.vs.ENSG00000215251.3	0.00616622	0.00163822	0.7413
ENSG00000089012.13.vs.ENSG00000101307.14	-0.133982	0.0519269	0.175733
ENSG00000089101.16.vs.ENSG00000173404.4	0.0550523	-0.0736716	0.308737
ENSG00000089127.11.vs.ENSG00000111331.11	-0.00152533	0.000858643	0.771014
ENSG00000089169.13.vs.ENSG00000089127.11	0.0432947	-0.000759959	0.875318
ENSG00000089280.17.vs.ENSG00000260060.1	-0.00391519	1.77021	0.0400007
ENSG00000089280.17.vs.ENSG00000261359.2	-0.00342645	-2.82646	0.121792
ENSG00000089639.9.vs.ENSG00000105726.15	-0.0146399	-0.00303367	0.265979
ENSG00000089692.7.vs.ENSG00000010610.8	0.015187	-0.0208866	0.066827
ENSG00000089692.7.vs.ENSG00000159335.14	-0.00388738	-0.0017187	0.347577
ENSG00000089775.10.vs.ENSG00000259116.1	-0.0338984	0.74058	0.0868085
ENSG00000089775.10.vs.ENSG00000272909.1	-0.0208377	0.116371	0.880713
ENSG00000090006.16.vs.ENSG00000160410.13	-0.00114534	-0.00356585	0.710787
ENSG00000090097.19.vs.ENSG00000280422.1	-0.00256221	-0.0223459	0.914248
ENSG00000090316.14.vs.ENSG00000163945.14	-0.0108413	0.0204463	0.303326
ENSG00000090470.13.vs.ENSG00000246922.7	-0.0529726	0.0130621	0.153247
ENSG00000090554.11.vs.ENSG00000142541.15	-0.0423234	-0.000622738	0.0475899
ENSG00000090615.11.vs.ENSG00000176915.13	0.00392464	-0.00715118	0.418336
ENSG00000090659.16.vs.ENSG00000182566.11	-0.0221662	0.0667012	0.551453
ENSG00000090674.14.vs.ENSG00000198816.5	-0.015441	-0.00349448	0.471752
ENSG00000090924.13.vs.ENSG00000128016.5	-0.0027725	-0.00119971	0.421262
ENSG00000090932.9.vs.ENSG00000105197.9	0.00228171	-0.0118354	0.357731
ENSG00000090932.9.vs.ENSG00000186838.12	-0.016254	-0.115647	0.93487
ENSG00000090975.11.vs.ENSG00000051825.13	0.0045363	0.0401741	0.0758816
ENSG00000090975.11.vs.ENSG00000150967.16	-0.00157867	0.0459362	0.502873
ENSG00000090975.11.vs.ENSG00000280120.1	0.0035676	0.0699163	0.794618
ENSG00000091073.18.vs.ENSG00000243566.5	-0.00180869	0.000661258	0.636647
ENSG00000091542.8.vs.ENSG00000091536.15	-2.80381e-06	0.102187	0.859087
ENSG00000091947.8.vs.ENSG00000221044.2	-0.00632356	2.92557	0.0111981
ENSG00000092010.13.vs.ENSG00000259371.2	-0.00535379	0.288504	0.0308238
ENSG00000092054.12.vs.ENSG00000197616.10	-1.27914	1.30432	0.719375
ENSG00000092068.17.vs.ENSG00000092067.5	1.17894e-05	-1.654	0.551904
ENSG00000092096.13.vs.ENSG00000100842.11	-0.0121034	0.00092894	0.732672
ENSG00000092140.13.vs.ENSG00000092108.19	0.0521566	-0.0232555	0.231845
ENSG00000092208.15.vs.ENSG00000258591.2	-0.0038926	-1.86119	0.615194
ENSG00000092295.10.vs.ENSG00000092330.14	0.00301362	-0.0168074	0.122987
ENSG00000092295.10.vs.ENSG00000100949.13	0.00529108	-0.0344727	0.0444016
ENSG00000092929.10.vs.ENSG00000266980.1	-0.00366377	1.57829	0.0836294
ENSG00000093134.12.vs.ENSG00000112299.7	0.0313401	-0.0069826	0.724394
ENSG00000093134.12.vs.ENSG00000112303.12	0.0283232	-0.0899583	0.322806
ENSG00000094631.17.vs.ENSG00000102145.12	-0.00769927	-0.0199755	0.776707
ENSG00000095059.14.vs.ENSG00000105583.8	-0.0229353	-0.00212556	0.0614874
ENSG00000095261.12.vs.ENSG00000270917.1	0.00381304	1.31029	0.531852
ENSG00000095370.18.vs.ENSG00000160404.16	-0.0152169	-0.0172016	0.623172
ENSG00000095485.15.vs.ENSG00000196072.10	0.00324628	-0.0109745	0.601645
ENSG00000095585.15.vs.ENSG00000229417.1	0.0115513	-0.287935	0.703498
ENSG00000095752.5.vs.ENSG00000269275.1	0.00988437	-1.64131	0.247078
ENSG00000095970.15.vs.ENSG00000161911.10	-0.0266551	-0.0761238	0.328794
ENSG00000096717.10.vs.ENSG00000219932.6	0.00865184	-2.3084	0.444603
ENSG00000097007.16.vs.ENSG00000130713.14	0.00236908	0.00108378	0.893694
ENSG00000097096.8.vs.ENSG00000280099.1	0.0650116	-0.179246	0.0306725
ENSG00000099204.17.vs.ENSG00000228169.3	0.00424046	-2.51768	0.180529
ENSG00000099260.9.vs.ENSG00000223656.1	-0.00174911	0.781465	0.0181649
ENSG00000099308.9.vs.ENSG00000268173.1	-0.0544821	2.41908	0.133877
ENSG00000099337.4.vs.ENSG00000099338.21	0.00209718	0.0143469	0.924691
ENSG00000099338.21.vs.ENSG00000099341.10	0.00855243	-0.00250253	0.705272
ENSG00000099617.3.vs.ENSG00000228300.12	0.0795927	-0.00419087	0.20497
ENSG00000099804.7.vs.ENSG00000197540.6	-0.0102005	-0.0429255	0.281013
ENSG00000099812.7.vs.ENSG00000099864.16	-0.000389136	0.00107126	0.975307
ENSG00000099904.14.vs.ENSG00000099901.15	-0.0150561	-0.00694705	0.0864185
ENSG00000099954.17.vs.ENSG00000182902.12	0.019988	0.0182998	0.135381
ENSG00000099974.7.vs.ENSG00000228039.3	-0.0708494	-3.63899	0.395197
ENSG00000099985.3.vs.ENSG00000279699.1	-0.0759998	1.45239	0.150871
ENSG00000099992.14.vs.ENSG00000239282.6	-0.0100002	-0.0282456	0.782714
ENSG00000099994.10.vs.ENSG00000099991.15	-0.00621418	-0.00431185	0.628679
ENSG00000100034.12.vs.ENSG00000100038.18	0.00872515	-0.182113	0.752443
ENSG00000100065.13.vs.ENSG00000100060.16	-0.00369196	-0.0488067	0.198116
ENSG00000100068.10.vs.ENSG00000231466.2	-0.0295032	-0.462284	0.497927
ENSG00000100092.19.vs.ENSG00000100083.17	0.000411801	-0.0165755	0.177884
ENSG00000100097.10.vs.ENSG00000100092.19	-0.000591572	-0.00332614	0.439406
ENSG00000100097.10.vs.ENSG00000100101.14	-0.000487448	-3.07012	0.573234
ENSG00000100097.10.vs.ENSG00000273899.3	-0.000674204	-0.0741108	0.247761
ENSG00000100116.15.vs.ENSG00000128310.2	-0.000751211	-0.56296	0.922847
ENSG00000100139.12.vs.ENSG00000280527.1	0.00101865	-0.0776022	0.928969
ENSG00000100142.13.vs.ENSG00000100139.12	-1.64054	0.000320405	0.533926
ENSG00000100142.13.vs.ENSG00000278948.1	-1.68687	0.0203943	0.501618
ENSG00000100142.13.vs.ENSG00000280527.1	-1.65829	0.00489123	0.539788
ENSG00000100147.12.vs.ENSG00000198911.10	0.0167133	0.001656	0.676698
ENSG00000100170.8.vs.ENSG00000232346.1	0.0191599	-0.524632	0.161704
ENSG00000100197.19.vs.ENSG00000205702.9	0.0865359	-0.474701	0.336358
ENSG00000100220.10.vs.ENSG00000184459.7	-0.0120843	0.200288	0.0409638
ENSG00000100220.10.vs.ENSG00000205853.9	-0.0148059	-2.18751	0.0182472
ENSG00000100226.14.vs.ENSG00000272669.1	-0.012619	-0.132681	0.177573
ENSG00000100226.14.vs.ENSG00000273076.1	-0.0132649	-1.3252	0.200854
ENSG00000100280.15.vs.ENSG00000100276.9	-0.000615821	0.0291761	0.626623
ENSG00000100297.14.vs.ENSG00000100292.15	-0.00348074	-0.000459993	0.626928
ENSG00000100335.11.vs.ENSG00000128268.11	0.00783099	-0.00194508	0.763929
ENSG00000100350.13.vs.ENSG00000100348.8	0.0117014	-0.0133755	0.0164403
ENSG00000100350.13.vs.ENSG00000100353.16	0.00818106	-0.00422055	0.0284662
ENSG00000100359.19.vs.ENSG00000272834.1	-0.00805026	1.48109	0.295208
ENSG00000100373.8.vs.ENSG00000213752.3	0.00183679	-3.54875	0.089767
ENSG00000100385.12.vs.ENSG00000133466.12	-0.0226401	0.000268576	0.208933
ENSG00000100401.18.vs.ENSG00000100399.14	-0.00222851	-0.00869141	0.633887
ENSG00000100426.6.vs.ENSG00000229409.1	0.00950333	-5.1369	0.417742
ENSG00000100445.15.vs.ENSG00000139899.9	-0.01391	-0.221138	0.160535
ENSG00000100479.11.vs.ENSG00000165506.13	0.0170721	-0.0408444	0.632794
ENSG00000100490.8.vs.ENSG00000012983.10	0.0711384	0.0117444	0.557404
ENSG00000100519.10.vs.ENSG00000198252.10	-0.0230077	0.0438042	0.0838465
ENSG00000100568.9.vs.ENSG00000072042.11	-0.00719035	0.00062259	0.707583
ENSG00000100596.5.vs.ENSG00000100593.16	-0.00652371	0.0655073	0.0736959
ENSG00000100628.10.vs.ENSG00000258584.1	-0.0144614	-1.16404	0.696069
ENSG00000100714.14.vs.ENSG00000179841.8	-0.00214172	0.0201118	0.866549
ENSG00000100802.13.vs.ENSG00000100804.17	0.0148526	-0.00437747	0.521327
ENSG00000100804.17.vs.ENSG00000280129.1	-0.00336115	0.414957	0.149613
ENSG00000100918.11.vs.ENSG00000259529.1	-0.0966221	0.239065	0.00341739
ENSG00000100979.13.vs.ENSG00000124257.6	0.000151407	-0.171795	0.932599
ENSG00000100979.13.vs.ENSG00000271984.1	-0.000355339	0.950382	0.744145
ENSG00000100997.17.vs.ENSG00000276952.1	-0.00176811	0.136122	0.663138
ENSG00000101052.11.vs.ENSG00000101049.13	-0.0102039	0.00718379	0.339723
ENSG00000101052.11.vs.ENSG00000215467.2	-0.00801327	1.88092	0.397904
ENSG00000101104.11.vs.ENSG00000166913.11	0.00139761	-0.00145926	0.426687
ENSG00000101203.15.vs.ENSG00000266104.1	0.392081	3.4627	0.572174
ENSG00000101222.11.vs.ENSG00000101220.16	-0.377658	-0.00373228	0.431649
ENSG00000101236.15.vs.ENSG00000275582.1	0.00980214	0.276994	0.519933
ENSG00000101255.9.vs.ENSG00000125826.18	0.00211427	-0.00631815	0.262906
ENSG00000101255.9.vs.ENSG00000125841.11	-0.0018334	0.0111711	0.508304
ENSG00000101292.7.vs.ENSG00000225022.1	-6.61635	0.96805	0.46032
ENSG00000101310.13.vs.ENSG00000214612.3	-0.0060221	-3.11695	0.141217
ENSG00000101336.11.vs.ENSG00000101337.14	-0.0275862	0.00244905	0.0121545
ENSG00000101391.19.vs.ENSG00000101400.5	0.0174672	-0.00434978	0.468179
ENSG00000101445.8.vs.ENSG00000101447.12	-0.0261058	0.00238138	0.528688
ENSG00000101460.11.vs.ENSG00000125971.15	-0.00126623	0.00015393	0.990948
ENSG00000101911.11.vs.ENSG00000229083.1	0.00139455	-5.4019	0.52086
ENSG00000102003.9.vs.ENSG00000012211.11	-0.00922127	-0.00203364	0.964625
ENSG00000102003.9.vs.ENSG00000102001.11	-0.00546238	-0.0529368	0.923303
ENSG00000102057.8.vs.ENSG00000068308.12	0.094661	-0.0101249	0.106907
ENSG00000102057.8.vs.ENSG00000068400.12	0.0929474	-0.0109085	0.0947791
ENSG00000102100.13.vs.ENSG00000102096.9	0.000307466	-0.0435387	0.10316
ENSG00000102119.9.vs.ENSG00000147403.15	-0.00408537	-0.000472079	0.371675
ENSG00000102226.8.vs.ENSG00000102225.14	-0.0103774	0.00515545	0.123467
ENSG00000102239.4.vs.ENSG00000102241.10	0.0616845	-0.00254932	0.183136
ENSG00000102359.5.vs.ENSG00000261295.1	-0.00972361	0.255468	0.0882921
ENSG00000102384.12.vs.ENSG00000126950.7	0.0647587	0.0486509	0.00889376
ENSG00000102805.12.vs.ENSG00000228002.2	0.0172047	3.87708	0.00507309
ENSG00000102858.11.vs.ENSG00000168101.13	-0.00291333	-0.0132422	0.685055
ENSG00000102870.5.vs.ENSG00000280211.1	0.00958156	0.108635	0.624173
ENSG00000102898.10.vs.ENSG00000168286.2	0.00122159	-0.0123966	0.802648
ENSG00000102962.4.vs.ENSG00000006210.6	-0.0233427	-0.00478133	0.260562
ENSG00000103034.13.vs.ENSG00000276259.1	-0.00740385	-0.0443269	0.523731
ENSG00000103037.10.vs.ENSG00000103034.13	-0.0130703	-0.00727457	0.473124
ENSG00000103037.10.vs.ENSG00000276259.1	-0.0147012	-0.065084	0.788391
ENSG00000103043.13.vs.ENSG00000132613.13	-5.63066e-05	0.00129774	0.985049
ENSG00000103043.13.vs.ENSG00000157423.16	0.000431166	-0.116044	0.956803
ENSG00000103064.12.vs.ENSG00000103066.11	0.0224817	-0.0113809	0.069927
ENSG00000103067.10.vs.ENSG00000260891.1	0.000495546	0.99727	0.0841314
ENSG00000103168.15.vs.ENSG00000250685.6	-0.00476037	0.172115	0.535971
ENSG00000103260.7.vs.ENSG00000279255.1	-0.0269762	0.464385	0.220102
ENSG00000103264.14.vs.ENSG00000261592.1	-0.0152754	1.18239	0.608267
ENSG00000103313.10.vs.ENSG00000010539.10	-0.152507	0.0719299	0.152593
ENSG00000103335.18.vs.ENSG00000278341.1	-0.00133374	-0.641054	0.215818
ENSG00000103351.11.vs.ENSG00000262312.2	-0.0451086	-1.72375	0.122171
ENSG00000103485.16.vs.ENSG00000197471.10	0.00376756	-0.0384696	0.012059
ENSG00000103495.12.vs.ENSG00000280789.1	-0.000890397	0.00222931	0.993465
ENSG00000103495.12.vs.ENSG00000281348.1	-0.00147458	1.24766	0.917829
ENSG00000103510.18.vs.ENSG00000103507.12	-0.0062542	-0.00930657	0.537924
ENSG00000103540.15.vs.ENSG00000103544.13	0.00333038	-0.00205354	0.931302
ENSG00000103544.13.vs.ENSG00000174628.15	0.00107906	-0.0253218	0.922957
ENSG00000103550.12.vs.ENSG00000276571.1	0.00642253	0.29667	0.654391
ENSG00000103657.12.vs.ENSG00000259248.4	0.00711899	0.13352	0.101629
ENSG00000104221.11.vs.ENSG00000156675.14	-0.0243124	0.00240728	0.733479
ENSG00000104341.15.vs.ENSG00000202399.1	-0.00127283	6.30388	0.0824891
ENSG00000104524.12.vs.ENSG00000104522.14	0.0107565	-0.00442948	0.496661
ENSG00000104524.12.vs.ENSG00000104529.16	0.00912533	-0.00525014	0.487647
ENSG00000104635.12.vs.ENSG00000120910.13	0.00418343	-0.0400606	0.264403
ENSG00000104824.15.vs.ENSG00000104823.7	-0.00253732	-0.00587689	0.076519
ENSG00000104827.12.vs.ENSG00000104826.10	0.528843	-1.23069	0.0538306
ENSG00000104852.13.vs.ENSG00000104863.10	-0.00310485	0.0132882	0.403842
ENSG00000104870.11.vs.ENSG00000142534.5	-0.00183711	-0.00100478	0.0289003
ENSG00000104870.11.vs.ENSG00000142552.6	-0.00273175	-0.00167493	0.585458
ENSG00000104918.6.vs.ENSG00000269228.1	-0.817767	-2.84821	0.488893
ENSG00000104957.12.vs.ENSG00000037757.12	-0.00874251	0.00882893	0.798365
ENSG00000104980.6.vs.ENSG00000260500.1	-0.0171934	0.757882	0.460777
ENSG00000105058.10.vs.ENSG00000072958.7	-0.00856034	-0.00515685	0.385752
ENSG00000105131.6.vs.ENSG00000141867.16	-0.000713695	0.000647465	0.986525
ENSG00000105136.18.vs.ENSG00000152439.11	0.0185089	-0.0970696	0.537802
ENSG00000105137.11.vs.ENSG00000268564.1	0.00777731	-1.19699	0.633766
ENSG00000105176.16.vs.ENSG00000267258.1	0.000166295	2.37716	0.478277
ENSG00000105219.7.vs.ENSG00000105221.15	-0.0814779	0.00251595	0.736167
ENSG00000105219.7.vs.ENSG00000174521.7	-0.0656724	0.00596126	0.856039
ENSG00000105227.13.vs.ENSG00000160396.8	-0.0110438	-0.721287	0.814474
ENSG00000105270.13.vs.ENSG00000181392.13	-0.00218999	-0.00640583	0.875919
ENSG00000105321.11.vs.ENSG00000257704.3	-0.0309285	-0.0242521	0.0756753
ENSG00000105323.15.vs.ENSG00000142039.3	-0.00519271	0.0132988	0.206897
ENSG00000105355.7.vs.ENSG00000127666.9	0.0063296	-0.0169836	0.272641
ENSG00000105369.8.vs.ENSG00000076928.16	-0.0035027	-0.00418142	0.38124
ENSG00000105369.8.vs.ENSG00000276926.1	-0.00577991	-1.54217	0.50586
ENSG00000105372.5.vs.ENSG00000105369.8	-0.000494546	-0.00479495	0.192448
ENSG00000105374.8.vs.ENSG00000105379.8	-0.00487028	-0.000508668	0.862166
ENSG00000105402.6.vs.ENSG00000118156.11	-0.0134629	-0.0107543	0.189851
ENSG00000105409.14.vs.ENSG00000105404.9	-0.0204916	-0.00483897	0.415969
ENSG00000105523.3.vs.ENSG00000268093.1	0.00890956	1.46602	0.357918
ENSG00000105552.13.vs.ENSG00000087076.7	-0.0016176	0.0119796	0.173101
ENSG00000105605.6.vs.ENSG00000126583.9	0.0413449	-0.0768011	0.685335
ENSG00000105642.14.vs.ENSG00000007080.9	-0.065577	-0.00815792	0.388262
ENSG00000105643.8.vs.ENSG00000105642.14	-0.00984296	-0.0706214	0.559976
ENSG00000105647.13.vs.ENSG00000099308.9	-0.104814	-0.052793	0.193705
ENSG00000105647.13.vs.ENSG00000216490.3	-0.155159	-0.418018	0.0633006
ENSG00000105650.20.vs.ENSG00000130518.15	-0.044087	-0.035985	0.413663
ENSG00000105655.17.vs.ENSG00000105656.11	-0.0024993	-0.0203621	0.348262
ENSG00000105695.13.vs.ENSG00000012124.13	-0.55171	-0.00382634	0.675146
ENSG00000105695.13.vs.ENSG00000105697.6	0.0891578	-0.369572	0.207805
ENSG00000105699.15.vs.ENSG00000105698.14	0.00081665	-0.00560626	0.505575
ENSG00000105701.14.vs.ENSG00000105656.11	-0.00231484	-0.00799225	0.359236
ENSG00000105711.9.vs.ENSG00000089351.13	-0.0857239	0.00161616	0.39647
ENSG00000105755.6.vs.ENSG00000176531.9	-0.00213263	-0.00157057	0.865667
ENSG00000105767.2.vs.ENSG00000011422.10	0.00188438	-0.0010925	0.884792
ENSG00000105767.2.vs.ENSG00000131116.10	0.00709184	-0.0224173	0.302124
ENSG00000105829.10.vs.ENSG00000278959.1	-0.0219295	-0.00785173	0.746606
ENSG00000105852.9.vs.ENSG00000105854.11	-0.00310048	0.00311445	0.774873
ENSG00000105880.4.vs.ENSG00000231764.7	0.0252703	-0.014463	0.327553
ENSG00000105939.11.vs.ENSG00000146858.7	0.0059471	0.0930618	0.105727
ENSG00000105997.21.vs.ENSG00000078399.14	-0.024084	-0.014936	0.320161
ENSG00000105997.21.vs.ENSG00000105996.6	-0.00499079	-0.194928	0.418535
ENSG00000106004.4.vs.ENSG00000106006.6	0.0137262	-0.221772	0.44307
ENSG00000106153.12.vs.ENSG00000164776.8	-0.00115929	-0.0102848	0.865469
ENSG00000106153.12.vs.ENSG00000185290.3	-0.000896892	-0.109686	0.631975
ENSG00000106258.12.vs.ENSG00000224448.1	0.00249538	2.00152	0.0335793
ENSG00000106333.11.vs.ENSG00000106330.10	-0.00209921	-0.0214908	0.398808
ENSG00000106333.11.vs.ENSG00000106336.11	-0.0024568	0.0145024	0.774118
ENSG00000106351.11.vs.ENSG00000184414.2	-0.00091014	1.16819	0.656346
ENSG00000106384.9.vs.ENSG00000213394.3	0.105187	-5.08125	0.116241
ENSG00000106479.9.vs.ENSG00000171130.16	0.0213446	0.00409709	0.252964
ENSG00000106484.13.vs.ENSG00000270953.1	-0.00266338	-0.113678	0.647677
ENSG00000106609.15.vs.ENSG00000179131.7	-0.000835696	1.28976	0.907776
ENSG00000106633.14.vs.ENSG00000106631.7	-0.43586	-0.49516	0.642416
ENSG00000106682.13.vs.ENSG00000086730.15	-0.00128749	-0.036108	0.381231
ENSG00000106701.10.vs.ENSG00000070214.14	0.0162679	0.00120026	0.610116
ENSG00000106785.13.vs.ENSG00000106789.11	-0.00106727	-0.00062659	0.964265
ENSG00000106789.11.vs.ENSG00000095383.18	-0.00257804	0.00590053	0.160869
ENSG00000106809.9.vs.ENSG00000127083.7	-0.00219665	0.0593657	0.372501
ENSG00000106948.15.vs.ENSG00000095397.12	-0.0150787	-0.00228999	0.321778
ENSG00000107020.8.vs.ENSG00000231967.1	-0.0223376	-0.937854	0.435612
ENSG00000107281.8.vs.ENSG00000054179.10	-0.0113809	0.0294446	0.0794077
ENSG00000107281.8.vs.ENSG00000180549.7	-0.00931085	-0.193392	0.207807
ENSG00000107331.15.vs.ENSG00000180549.7	-0.0096523	-0.172862	0.23445
ENSG00000107438.7.vs.ENSG00000234026.1	-0.00157877	0.0855465	0.382668
ENSG00000107625.11.vs.ENSG00000165730.13	-0.0095449	0.0188776	0.791556
ENSG00000107625.11.vs.ENSG00000165732.11	-0.0127952	0.0011441	0.809394
ENSG00000107738.18.vs.ENSG00000214688.4	-0.00370096	-2.8458	0.45112
ENSG00000107874.9.vs.ENSG00000059915.15	-0.00899733	-0.00550212	0.612244
ENSG00000107902.12.vs.ENSG00000278831.1	-0.00366309	-0.127262	0.910554
ENSG00000108187.14.vs.ENSG00000204130.11	0.0547622	0.02745	0.0233685
ENSG00000108352.10.vs.ENSG00000108349.13	0.00157971	0.0030668	0.0744118
ENSG00000108375.11.vs.ENSG00000176160.8	0.0169746	1.05504	0.0169418
ENSG00000108389.8.vs.ENSG00000108387.13	0.00637034	0.016697	0.267578
ENSG00000108405.3.vs.ENSG00000004660.13	-0.0159662	0.00347711	0.674737
ENSG00000108405.3.vs.ENSG00000074370.16	-0.0113242	-0.00357009	0.444799
ENSG00000108506.10.vs.ENSG00000136492.7	0.0363313	-0.0025257	0.0772702
ENSG00000108511.9.vs.ENSG00000120068.6	0.00407903	-0.0178224	0.525165
ENSG00000108587.13.vs.ENSG00000108582.10	-0.00929921	0.00336413	0.409936
ENSG00000108592.15.vs.ENSG00000108604.14	-0.00227665	0.00180309	0.863534
ENSG00000108639.6.vs.ENSG00000187997.10	-0.00175411	0.202354	0.42123
ENSG00000108639.6.vs.ENSG00000267679.1	-0.000821751	-0.569399	0.806096
ENSG00000108654.10.vs.ENSG00000256525.5	-0.000508205	0.037926	0.611476
ENSG00000108669.15.vs.ENSG00000055483.18	-0.00151338	0.00879328	0.717428
ENSG00000108671.8.vs.ENSG00000176749.7	-0.00396359	0.0451739	1.97104e-26
ENSG00000108784.8.vs.ENSG00000108786.9	-0.000725924	0.0042738	0.268459
ENSG00000108784.8.vs.ENSG00000267185.1	-0.000879454	0.825298	0.439964
ENSG00000108785.7.vs.ENSG00000108784.8	0.231034	0.00197031	0.0288124
ENSG00000108786.9.vs.ENSG00000068120.13	0.00442499	-0.00250881	0.245305
ENSG00000108799.11.vs.ENSG00000214578.5	-0.00609345	0.0157052	0.917774
ENSG00000108819.10.vs.ENSG00000253730.1	0.00400984	-1.44867	0.175889
ENSG00000108829.9.vs.ENSG00000279792.1	0.00147892	0.742045	0.214314
ENSG00000108840.14.vs.ENSG00000161654.8	0.0088697	-0.00880889	0.4694
ENSG00000108861.7.vs.ENSG00000167941.2	0.000488188	-0.597402	0.862575
ENSG00000108947.4.vs.ENSG00000183914.13	0.0319429	-0.187518	0.126402
ENSG00000108963.16.vs.ENSG00000228133.2	-0.0699086	3.78931	0.00942647
ENSG00000109089.7.vs.ENSG00000167862.8	0.0109473	-0.00069866	0.0727505
ENSG00000109255.10.vs.ENSG00000163440.9	0.0346489	-4.18544	0.0171919
ENSG00000109270.11.vs.ENSG00000164031.15	-0.0143602	0.0380459	0.0155925
ENSG00000109272.3.vs.ENSG00000124875.8	0.506656	-0.0110485	0.0798816
ENSG00000109654.13.vs.ENSG00000121211.6	0.00605618	0.00399408	0.443667
ENSG00000109758.7.vs.ENSG00000159788.17	-0.662729	0.00050736	0.518929
ENSG00000109854.12.vs.ENSG00000185238.11	-0.00434284	0.00798834	0.834733
ENSG00000109906.12.vs.ENSG00000166741.6	-0.0276611	-4.91515e-06	0.871113
ENSG00000109944.9.vs.ENSG00000109943.7	0.130642	-0.135605	0.0171633
ENSG00000110011.12.vs.ENSG00000149781.11	-0.0153978	-0.0154019	0.109162
ENSG00000110011.12.vs.ENSG00000173486.11	-0.0159207	-0.000149146	0.335228
ENSG00000110076.17.vs.ENSG00000068831.17	0.00115544	-0.054412	0.414949
ENSG00000110090.11.vs.ENSG00000132749.9	-0.00961243	0.0192347	0.224464
ENSG00000110169.9.vs.ENSG00000110171.17	-0.0365154	-0.00646665	0.954562
ENSG00000110200.7.vs.ENSG00000149357.8	-0.0293649	-0.00125812	0.626848
ENSG00000110243.10.vs.ENSG00000109917.9	-0.575415	-0.00847181	0.679198
ENSG00000110245.10.vs.ENSG00000235910.1	-0.348845	1.98187	0.382578
ENSG00000110330.7.vs.ENSG00000023445.12	-0.000162503	-0.00171679	0.713918
ENSG00000110497.13.vs.ENSG00000180720.7	0.011837	-0.337402	0.611531
ENSG00000110651.10.vs.ENSG00000184281.13	-0.0017535	-0.0107123	0.112243
ENSG00000110719.8.vs.ENSG00000006534.14	-0.00691858	0.00183539	0.0874115
ENSG00000110723.10.vs.ENSG00000178202.11	0.0407663	0.00137786	0.0303662
ENSG00000110786.16.vs.ENSG00000179057.12	-0.192448	-0.0226785	0.863922
ENSG00000110799.12.vs.ENSG00000047617.13	-2.94083e-05	0.382402	0.0359758
ENSG00000110841.12.vs.ENSG00000276261.1	0.0110096	-0.406309	0.110637
ENSG00000110917.6.vs.ENSG00000175970.8	-9.10223e-05	0.0124302	0.520619
ENSG00000110955.7.vs.ENSG00000076108.10	-0.00111456	0.00395971	0.497869
ENSG00000111077.16.vs.ENSG00000063046.16	-0.00574498	-0.000762672	0.755581
ENSG00000111196.8.vs.ENSG00000060140.7	-0.0209489	0.00325089	0.618768
ENSG00000111229.14.vs.ENSG00000258011.2	-0.00602011	0.881314	0.026789
ENSG00000111276.9.vs.ENSG00000178878.11	-0.00926405	-0.00192015	0.51293
ENSG00000111300.8.vs.ENSG00000274227.1	-0.0216009	0.380514	0.440931
ENSG00000111319.11.vs.ENSG00000067182.6	-0.000695808	-0.00197268	0.457627
ENSG00000111331.11.vs.ENSG00000111335.11	0.00150058	-0.00197466	0.755877
ENSG00000111348.7.vs.ENSG00000139055.5	-0.0083358	0.00595434	0.000740657
ENSG00000111405.7.vs.ENSG00000079337.14	0.277582	-0.0175129	0.0584465
ENSG00000111405.7.vs.ENSG00000280054.1	0.18236	1.04042	0.0375511
ENSG00000111445.12.vs.ENSG00000276292.1	-0.0130883	1.9348	0.383289
ENSG00000111602.10.vs.ENSG00000274569.1	-0.00148959	4.7024	0.250526
ENSG00000111615.11.vs.ENSG00000257497.2	-0.0173261	-0.268605	0.108656
ENSG00000111642.13.vs.ENSG00000111641.9	0.00171326	-0.0168436	0.114475
ENSG00000111664.9.vs.ENSG00000250510.6	-0.0245854	0.0306007	0.870536
ENSG00000111670.13.vs.ENSG00000139351.13	-0.0114584	0.504196	0.0143395
ENSG00000111679.15.vs.ENSG00000111676.13	-0.0151242	-0.00165603	0.0841614
ENSG00000111679.15.vs.ENSG00000207708.1	-0.0164761	0.588735	0.15833
ENSG00000111679.15.vs.ENSG00000207713.2	-0.0164314	1.23495	0.132716
ENSG00000111679.15.vs.ENSG00000271969.1	-0.0144843	0.777569	0.00608749
ENSG00000111684.9.vs.ENSG00000238795.1	0.00321873	0.0566258	0.0348642
ENSG00000111716.11.vs.ENSG00000121361.3	-0.000771394	-0.016904	0.473868
ENSG00000111837.10.vs.ENSG00000222383.1	0.121617	-2.91058	0.194156
ENSG00000111860.12.vs.ENSG00000216809.1	-0.127376	4.38634	0.00482993
ENSG00000111911.6.vs.ENSG00000066651.16	0.0136733	-0.0314244	0.673375
ENSG00000111981.4.vs.ENSG00000231120.3	0.135771	-1.87054	0.399437
ENSG00000112031.14.vs.ENSG00000091844.6	0.0801577	0.0364884	0.251996
ENSG00000112039.3.vs.ENSG00000276712.1	0.0120203	-1.31896	0.478007
ENSG00000112208.11.vs.ENSG00000112200.15	-9.54263e-06	0.0163168	0.138133
ENSG00000112308.11.vs.ENSG00000272345.1	0.00142753	-0.11901	0.82407
ENSG00000112486.13.vs.ENSG00000166984.10	-1.57473	1.15677	0.409857
ENSG00000112655.14.vs.ENSG00000112658.7	0.00205392	-0.0145696	0.236643
ENSG00000112655.14.vs.ENSG00000137171.13	0.0011922	-0.0178464	0.470156
ENSG00000112763.14.vs.ENSG00000111801.14	-0.0304091	-0.00654841	0.12575
ENSG00000112852.6.vs.ENSG00000113205.4	0.0274792	0.0205615	0.257472
ENSG00000113212.6.vs.ENSG00000120322.3	-0.0731675	0.155086	0.00806913
ENSG00000113212.6.vs.ENSG00000272674.3	0.0338826	0.0184486	0.386816
ENSG00000113269.12.vs.ENSG00000278965.1	-0.00275819	-0.433297	0.886357
ENSG00000113272.12.vs.ENSG00000155858.5	-0.0498725	0.0423718	0.0987535
ENSG00000113460.11.vs.ENSG00000168724.13	-0.0103938	0.0130949	0.224189
ENSG00000113520.9.vs.ENSG00000230612.2	-0.768216	1.0307	0.15576
ENSG00000113552.14.vs.ENSG00000254099.1	0.00507963	1.19543	0.0691708
ENSG00000113569.14.vs.ENSG00000270558.1	0.00925166	-0.133743	0.230159
ENSG00000113594.8.vs.ENSG00000251257.2	-0.00393889	-0.13118	0.863801
ENSG00000113600.9.vs.ENSG00000082074.14	0.199547	-0.00755439	0.410375
ENSG00000113621.13.vs.ENSG00000279799.1	-0.00856466	-0.0810792	0.790295
ENSG00000113638.11.vs.ENSG00000132356.10	0.0259934	0.00251566	0.565387
ENSG00000113643.7.vs.ENSG00000188573.7	0.00203981	-0.00149353	0.964635
ENSG00000113716.11.vs.ENSG00000155850.7	0.0128965	0.00642555	4.54811e-05
ENSG00000113722.15.vs.ENSG00000011083.7	0.0118317	-0.226185	0.32865
ENSG00000113732.7.vs.ENSG00000253785.1	-0.00132721	-0.618847	0.695265
ENSG00000113758.12.vs.ENSG00000246334.2	0.000778824	0.534775	0.339931
ENSG00000113758.12.vs.ENSG00000279821.1	0.000541823	0.168214	0.650713
ENSG00000113812.12.vs.ENSG00000113811.9	0.0286877	-0.0279415	0.132585
ENSG00000113812.12.vs.ENSG00000271976.1	-0.0184314	0.0603836	0.733462
ENSG00000113851.12.vs.ENSG00000281584.1	-0.0103749	2.54393	0.56483
ENSG00000113905.4.vs.ENSG00000090512.10	-0.348897	0.00322921	0.500654
ENSG00000114021.10.vs.ENSG00000036054.11	-0.000754496	0.0314468	0.109536
ENSG00000114126.16.vs.ENSG00000279147.1	0.0197571	4.17746	0.00239306
ENSG00000114127.9.vs.ENSG00000175054.13	0.0053042	0.0338618	0.00961531
ENSG00000114270.14.vs.ENSG00000010256.9	-0.000516597	-0.00145353	0.501161
ENSG00000114270.14.vs.ENSG00000114268.10	-0.000566471	-0.00345693	0.603958
ENSG00000114331.11.vs.ENSG00000173950.14	0.0149507	0.000569636	0.093062
ENSG00000114349.8.vs.ENSG00000188338.13	1.00509	-0.13013	0.435656
ENSG00000114383.8.vs.ENSG00000114378.15	-0.0221446	-0.00993538	0.390244
ENSG00000114391.11.vs.ENSG00000066422.4	-0.000254099	0.0192914	0.631434
ENSG00000114491.12.vs.ENSG00000160145.14	0.00585643	0.0103512	0.0261213
ENSG00000114520.9.vs.ENSG00000144909.7	0.00708214	0.0237708	0.133195
ENSG00000114520.9.vs.ENSG00000252965.1	0.0152722	0.0489581	0.371235
ENSG00000114544.14.vs.ENSG00000144908.12	0.00410763	-0.000358231	0.866098
ENSG00000114626.16.vs.ENSG00000221413.1	-0.00453241	3.30075	0.508965
ENSG00000114646.8.vs.ENSG00000173473.9	0.0207295	-0.00139338	0.64228
ENSG00000114744.7.vs.ENSG00000206199.8	0.019499	0.0302586	0.179523
ENSG00000114770.15.vs.ENSG00000223529.1	0.0010778	-1.51957	0.270748
ENSG00000114854.6.vs.ENSG00000010319.5	-0.00335763	-0.0219649	0.688408
ENSG00000114993.14.vs.ENSG00000233155.1	-0.000332993	-0.975459	0.798927
ENSG00000115226.8.vs.ENSG00000138002.13	0.00376528	0.00747695	0.861454
ENSG00000115266.10.vs.ENSG00000115268.8	0.0157984	-0.00130532	0.405206
ENSG00000115268.8.vs.ENSG00000071626.15	-0.000917355	-0.00330055	0.349367
ENSG00000115275.10.vs.ENSG00000204822.6	-0.00952638	0.0998662	0.330106
ENSG00000115286.18.vs.ENSG00000160953.13	-0.00875999	0.00765919	0.557879
ENSG00000115364.12.vs.ENSG00000270462.1	-0.0131416	2.07569	0.220271
ENSG00000115504.13.vs.ENSG00000115507.8	-0.00224033	0.0833781	0.266372
ENSG00000115524.14.vs.ENSG00000213104.3	0.00106763	1.01961	0.804997
ENSG00000115594.10.vs.ENSG00000115598.8	0.00754384	0.0577595	0.00410958
ENSG00000115649.14.vs.ENSG00000213901.9	0.00288208	0.0518025	0.214449
ENSG00000115649.14.vs.ENSG00000280537.1	0.00330753	0.309412	0.364586
ENSG00000115760.12.vs.ENSG00000018699.10	0.00733056	-0.0291223	0.0182471
ENSG00000115808.10.vs.ENSG00000279519.1	0.014992	0.119458	0.177097
ENSG00000115841.18.vs.ENSG00000232973.10	0.0961485	0.0300576	0.0596006
ENSG00000115850.8.vs.ENSG00000076003.4	0.220756	-0.00130351	0.921224
ENSG00000115902.9.vs.ENSG00000232613.5	0.00528211	-1.52367	0.558758
ENSG00000115998.6.vs.ENSG00000231414.1	0.0506885	-0.771765	0.715297
ENSG00000116001.14.vs.ENSG00000231414.1	0.000450859	-0.639658	0.910289
ENSG00000116014.8.vs.ENSG00000116017.9	-0.98686	0.00599534	0.119845
ENSG00000116017.9.vs.ENSG00000065268.9	0.00446399	-0.0124114	0.230086
ENSG00000116030.15.vs.ENSG00000223825.5	-0.00553638	-0.35825	0.47274
ENSG00000116032.5.vs.ENSG00000065268.9	-0.153263	-0.0102565	0.355591
ENSG00000116039.10.vs.ENSG00000116035.2	0.0779529	-0.0687253	0.0645737
ENSG00000116095.9.vs.ENSG00000237298.7	0.00175818	0.0891423	0.00383523
ENSG00000116199.10.vs.ENSG00000186283.12	0.00852254	-0.0153733	0.21664
ENSG00000116254.16.vs.ENSG00000116251.8	-0.00395256	-0.00406722	0.144368
ENSG00000116396.12.vs.ENSG00000197106.6	0.00652114	0.135581	0.207894
ENSG00000116478.10.vs.ENSG00000182866.15	-0.00581012	-0.0256751	0.121596
ENSG00000116489.11.vs.ENSG00000155363.17	-0.00270028	0.000305526	0.673204
ENSG00000116525.12.vs.ENSG00000278997.1	-0.0503495	0.696045	0.0357217
ENSG00000116584.16.vs.ENSG00000163479.12	0.00428435	-0.00164006	0.56735
ENSG00000116678.17.vs.ENSG00000116675.14	0.0390277	-0.0126103	0.337896
ENSG00000116691.9.vs.ENSG00000116688.15	-0.0140963	-0.00421415	0.206398
ENSG00000116729.12.vs.ENSG00000229133.1	0.00400582	-1.48763	0.127069
ENSG00000116748.18.vs.ENSG00000175984.13	-2.3969	0.0102289	0.135049
ENSG00000116752.5.vs.ENSG00000175984.13	-0.0151649	0.0140719	0.324195
ENSG00000116771.5.vs.ENSG00000272510.1	0.026635	-1.41593	0.524878
ENSG00000116786.10.vs.ENSG00000162460.6	0.00636874	0.20549	0.155018
ENSG00000116898.10.vs.ENSG00000116885.17	-0.00805242	-0.101698	0.139087
ENSG00000116898.10.vs.ENSG00000119535.16	-0.0109113	0.00536986	0.247151
ENSG00000117069.13.vs.ENSG00000230498.1	-0.150845	7.27463	0.133007
ENSG00000117118.8.vs.ENSG00000159363.16	-0.0134751	-0.00262562	0.259383
ENSG00000117122.12.vs.ENSG00000159363.16	0.000947092	-0.00586682	0.687956
ENSG00000117153.14.vs.ENSG00000183155.4	0.00506678	0.0147671	0.759622
ENSG00000117222.12.vs.ENSG00000174529.7	0.0247075	-0.0699102	0.000203839
ENSG00000117308.13.vs.ENSG00000117305.13	-0.00431829	0.00151634	0.663221
ENSG00000117322.15.vs.ENSG00000203710.9	0.000207149	-0.0458708	0.629097
ENSG00000117410.12.vs.ENSG00000132768.12	-0.00352016	-0.00130925	0.537407
ENSG00000117411.15.vs.ENSG00000132768.12	0.00107063	-0.00996464	0.827264
ENSG00000117425.12.vs.ENSG00000070785.15	-0.188699	-0.0297212	0.228366
ENSG00000117594.8.vs.ENSG00000123689.5	0.0432696	-0.0124756	0.0977713
ENSG00000117594.8.vs.ENSG00000236136.1	0.0260815	0.354555	0.392761
ENSG00000117682.15.vs.ENSG00000131914.9	0.000249735	-0.714294	0.842575
ENSG00000117682.15.vs.ENSG00000198830.9	-0.00347889	-8.57807e-05	0.970158
ENSG00000117713.16.vs.ENSG00000060642.9	-0.00426233	0.0221673	0.515949
ENSG00000117758.12.vs.ENSG00000117751.16	-0.0153053	-0.0127137	0.300133
ENSG00000118113.10.vs.ENSG00000137675.4	-0.030949	3.10669	0.134424
ENSG00000118160.12.vs.ENSG00000105419.16	0.0672401	-0.025986	0.353643
ENSG00000118200.13.vs.ENSG00000231333.2	0.0169976	-0.350875	1.10054e-05
ENSG00000118292.7.vs.ENSG00000159208.14	-0.122948	0.0325504	0.0352699
ENSG00000118402.5.vs.ENSG00000218582.2	0.0524114	-0.411865	0.0731203
ENSG00000118473.20.vs.ENSG00000152760.8	0.0174707	-0.427203	0.790916
ENSG00000118816.8.vs.ENSG00000214062.5	-0.00282151	0.937529	0.00722376
ENSG00000118873.14.vs.ENSG00000232134.1	0.00475944	-1.00275	0.487401
ENSG00000119231.9.vs.ENSG00000225578.1	0.0167657	0.994365	0.0329028
ENSG00000119326.13.vs.ENSG00000106771.11	0.000779798	0.00172657	0.944034
ENSG00000119333.10.vs.ENSG00000234705.1	0.000809153	0.149213	0.73089
ENSG00000119333.10.vs.ENSG00000280758.1	0.00176537	-1.05121	0.636539
ENSG00000119335.15.vs.ENSG00000160447.6	0.000382179	0.00501755	0.834934
ENSG00000119414.10.vs.ENSG00000235332.2	8.86912e-05	0.256596	0.997396
ENSG00000119431.8.vs.ENSG00000148218.14	-0.00653792	0.0180951	0.00754084
ENSG00000119559.14.vs.ENSG00000267317.2	-0.0101909	0.0300898	0.77096
ENSG00000119640.7.vs.ENSG00000119684.14	-0.042883	0.0406352	0.204023
ENSG00000119673.13.vs.ENSG00000279026.1	-0.0024965	0.330611	0.138107
ENSG00000119684.14.vs.ENSG00000258646.1	0.0474234	-1.87358	0.274389
ENSG00000119737.5.vs.ENSG00000265452.1	0.0673259	0.084554	0.898152
ENSG00000119777.17.vs.ENSG00000084764.9	-0.00377279	-0.0116568	0.42778
ENSG00000119922.8.vs.ENSG00000232110.6	0.00452203	-0.00657363	0.516177
ENSG00000119943.9.vs.ENSG00000107521.17	-0.00856626	0.00520503	0.757181
ENSG00000120029.11.vs.ENSG00000120049.17	0.0214193	-0.0663097	0.516978
ENSG00000120075.5.vs.ENSG00000108511.9	-0.0525478	0.0181051	0.420285
ENSG00000120093.10.vs.ENSG00000120068.6	-1.01634e-05	-0.0133527	0.541001
ENSG00000120318.14.vs.ENSG00000197948.9	0.000971071	0.00446499	0.856789
ENSG00000120324.6.vs.ENSG00000120322.3	0.110883	0.0623119	0.0050333
ENSG00000120324.6.vs.ENSG00000197479.6	0.13937	0.021261	0.0286484
ENSG00000120327.6.vs.ENSG00000187372.11	0.0392159	0.0468305	0.031687
ENSG00000120328.6.vs.ENSG00000187372.11	0.269371	0.00584546	0.00715416
ENSG00000120328.6.vs.ENSG00000197479.6	0.259836	0.0110449	0.00691377
ENSG00000120437.8.vs.ENSG00000146457.13	0.00631771	-0.0057715	0.589256
ENSG00000120440.12.vs.ENSG00000112494.8	-0.385141	0.162088	0.113041
ENSG00000120669.14.vs.ENSG00000242715.6	-0.187885	0.0691869	0.118956
ENSG00000120697.7.vs.ENSG00000102710.18	-0.0299422	0.00339314	0.223617
ENSG00000120709.9.vs.ENSG00000120733.12	0.00537129	0.00631428	0.420867
ENSG00000120738.7.vs.ENSG00000241458.1	-0.000942152	-3.36631	0.454164
ENSG00000120784.14.vs.ENSG00000198182.11	0.0660631	-0.0304238	0.435611
ENSG00000120913.22.vs.ENSG00000241852.8	0.00326563	-0.00830024	0.979372
ENSG00000120937.8.vs.ENSG00000175206.9	-3.53743	0.383438	0.514362
ENSG00000120948.14.vs.ENSG00000271895.2	-0.0121587	0.0372252	0.217609
ENSG00000121406.7.vs.ENSG00000152439.11	0.0408631	-0.108565	0.446667
ENSG00000121671.10.vs.ENSG00000121653.10	-0.00247315	-0.0516376	0.478794
ENSG00000121775.16.vs.ENSG00000025800.12	-0.0337311	0.00805463	0.324011
ENSG00000121904.16.vs.ENSG00000235907.2	0.0872643	2.08884	0.0485854
ENSG00000121940.14.vs.ENSG00000085433.14	-0.037666	0.0187529	0.507654
ENSG00000122068.11.vs.ENSG00000186001.11	0.00674083	-0.0118254	0.608912
ENSG00000122085.15.vs.ENSG00000225521.1	-0.0419362	2.68793	0.306242
ENSG00000122176.10.vs.ENSG00000229652.1	0.000306032	-3.54333	0.720458
ENSG00000122375.10.vs.ENSG00000122367.18	0.911686	-0.0675804	0.575983
ENSG00000122386.9.vs.ENSG00000085644.12	-0.0228903	0.00343486	0.662961
ENSG00000122477.11.vs.ENSG00000137992.13	-0.0161999	0.0142729	0.00733063
ENSG00000122694.14.vs.ENSG00000185972.5	-0.0275458	1.26036	0.00803402
ENSG00000122877.12.vs.ENSG00000238280.1	-0.0176184	-0.426469	0.680483
ENSG00000122912.13.vs.ENSG00000138346.13	0.0309274	-0.0094689	0.131197
ENSG00000122971.7.vs.ENSG00000175970.8	-0.0134709	0.0119066	0.356817
ENSG00000123144.9.vs.ENSG00000105576.14	-0.00878949	0.00267125	0.152105
ENSG00000123159.14.vs.ENSG00000160951.3	-0.00195783	-0.00405688	0.483899
ENSG00000123338.11.vs.ENSG00000123360.10	-0.0111461	-0.0879257	0.149794
ENSG00000123342.14.vs.ENSG00000135392.14	0.00631335	0.03427	0.193603
ENSG00000123342.14.vs.ENSG00000257390.4	0.00415945	-1.39461	0.413348
ENSG00000123349.12.vs.ENSG00000135476.10	-0.00458332	-0.00584348	0.177934
ENSG00000123395.13.vs.ENSG00000123358.18	-0.0131255	-0.000760818	0.602789
ENSG00000123411.13.vs.ENSG00000139531.11	0.00925093	0.00335377	0.819721
ENSG00000123453.15.vs.ENSG00000225756.1	-0.0335975	-0.0167147	0.788325
ENSG00000123838.9.vs.ENSG00000123843.11	-0.300636	0.0375327	0.480587
ENSG00000123870.10.vs.ENSG00000167562.10	0.177197	-0.0499443	0.206433
ENSG00000123933.13.vs.ENSG00000214367.6	-0.00658179	0.00133755	0.609943
ENSG00000123975.4.vs.ENSG00000187742.13	-0.00214136	0.00708764	0.739975
ENSG00000123999.4.vs.ENSG00000269068.1	0.0543073	3.14823	0.0262911
ENSG00000124006.13.vs.ENSG00000268896.1	0.00782136	-2.64782	0.235972
ENSG00000124067.15.vs.ENSG00000141096.4	0.00946802	-3.78649	0.0357732
ENSG00000124092.11.vs.ENSG00000124097.7	-0.186031	0.0972502	0.875951
ENSG00000124134.7.vs.ENSG00000175121.10	-0.024906	0.00597501	0.86316
ENSG00000124155.15.vs.ENSG00000244274.6	-0.000810009	0.0166772	0.923071
ENSG00000124226.9.vs.ENSG00000229222.1	-0.00321772	-0.291931	0.860379
ENSG00000124257.6.vs.ENSG00000271984.1	-0.277555	1.17159	0.646255
ENSG00000124313.11.vs.ENSG00000126012.10	0.00116309	0.00464602	0.422214
ENSG00000124391.4.vs.ENSG00000158545.14	-0.0339642	0.00315241	0.888104
ENSG00000124440.14.vs.ENSG00000011485.13	0.0211386	-0.0156952	0.104523
ENSG00000124508.15.vs.ENSG00000026950.15	0.00201034	-0.0132902	0.257428
ENSG00000124508.15.vs.ENSG00000186470.12	-0.0171539	-0.000769811	0.60129
ENSG00000124541.6.vs.ENSG00000112640.13	-0.00305692	-0.00499146	0.706509
ENSG00000124541.6.vs.ENSG00000137171.13	-0.00454608	-0.0103546	0.616333
ENSG00000124549.13.vs.ENSG00000026950.15	0.0974255	-0.0163143	0.186071
ENSG00000124549.13.vs.ENSG00000111801.14	0.0566322	-0.0146489	0.368564
ENSG00000124564.16.vs.ENSG00000124568.9	-0.541414	0.670428	0.00147287
ENSG00000124587.12.vs.ENSG00000181524.6	-0.00882744	-0.145362	0.212262
ENSG00000124701.5.vs.ENSG00000001167.13	0.176911	-0.00459082	0.267161
ENSG00000124701.5.vs.ENSG00000112212.10	0.170553	-0.234877	0.302669
ENSG00000124766.5.vs.ENSG00000220771.2	-0.00115581	0.796634	0.448388
ENSG00000124802.10.vs.ENSG00000188428.15	-0.0896538	0.00789103	0.0396289
ENSG00000124802.10.vs.ENSG00000259040.4	-0.0850765	-0.105183	0.0390831
ENSG00000124942.12.vs.ENSG00000254772.8	5.62615e-05	-0.476633	0.484833
ENSG00000124942.12.vs.ENSG00000255446.1	0.000122857	0.31586	0.926459
ENSG00000125046.13.vs.ENSG00000180914.9	0.260882	0.00153466	0.700695
ENSG00000125046.13.vs.ENSG00000227110.5	0.198538	0.38788	0.16149
ENSG00000125089.15.vs.ENSG00000250471.2	-0.0034029	-1.61071	0.201892
ENSG00000125149.10.vs.ENSG00000067955.12	0.0475556	-0.00373341	0.0860793
ENSG00000125257.12.vs.ENSG00000223298.1	0.00322131	-0.00649241	0.909885
ENSG00000125347.12.vs.ENSG00000234290.2	-0.00426736	-0.0508848	0.102374
ENSG00000125414.17.vs.ENSG00000109061.9	-0.545112	0.581628	0.767359
ENSG00000125434.9.vs.ENSG00000271029.1	0.0192738	-1.98884	0.427189
ENSG00000125449.5.vs.ENSG00000170190.14	-0.00845344	0.0015081	0.821366
ENSG00000125498.18.vs.ENSG00000243772.5	-0.741005	0.594809	0.824092
ENSG00000125503.11.vs.ENSG00000267507.1	-0.0130427	4.21295	0.0266358
ENSG00000125611.14.vs.ENSG00000125630.14	-0.0428549	-0.0276122	0.0525823
ENSG00000125735.9.vs.ENSG00000125730.15	0.185678	-0.0023875	0.0519594
ENSG00000125741.4.vs.ENSG00000125746.13	0.018805	-0.0122144	0.108766
ENSG00000125746.13.vs.ENSG00000177464.4	-0.0101258	-0.00654474	0.214064
ENSG00000125753.12.vs.ENSG00000213889.9	-0.00615895	0.00586127	0.0844735
ENSG00000125787.10.vs.ENSG00000132670.19	-0.105577	-0.00647753	0.608795
ENSG00000125810.9.vs.ENSG00000279447.1	0.00170688	1.32596	0.528388
ENSG00000125821.10.vs.ENSG00000101310.13	-0.0102436	-0.00042749	0.613227
ENSG00000125900.11.vs.ENSG00000101307.14	-6.8269	-0.0127077	0.21687
ENSG00000125910.5.vs.ENSG00000125912.9	-0.0751287	-0.00598813	0.173407
ENSG00000125952.17.vs.ENSG00000272158.1	-0.00872861	0.828451	0.480969
ENSG00000125966.9.vs.ENSG00000229230.3	0.0106993	2.78816	0.11011
ENSG00000125998.7.vs.ENSG00000126005.14	0.0104611	0.00340173	0.0698758
ENSG00000125998.7.vs.ENSG00000261582.1	0.00971531	0.482158	0.0215098
ENSG00000126062.3.vs.ENSG00000007402.10	-0.00342022	0.0508149	0.511895
ENSG00000126091.18.vs.ENSG00000117407.15	0.0397297	-0.0221468	0.455345
ENSG00000126218.10.vs.ENSG00000126231.12	0.0487917	0.491324	0.518956
ENSG00000126233.1.vs.ENSG00000197353.3	-0.00391567	0.0101111	0.719342
ENSG00000126246.8.vs.ENSG00000267439.1	-0.188255	1.15266	0.181665
ENSG00000126254.10.vs.ENSG00000105672.13	-0.0015977	-0.0397	0.819484
ENSG00000126266.3.vs.ENSG00000012124.13	-3.92894	0.000726994	0.517544
ENSG00000126266.3.vs.ENSG00000185897.6	-2.18826	-6.64097	0.173215
ENSG00000126267.7.vs.ENSG00000105668.6	-0.000618247	-0.000198334	0.838104
ENSG00000126267.7.vs.ENSG00000105672.13	-0.000398182	-0.0343153	0.846653
ENSG00000126337.12.vs.ENSG00000171401.13	0.0444411	-5.01141e-05	4.91993e-07
ENSG00000126602.9.vs.ENSG00000005339.11	-0.00160292	0.00681477	0.592471
ENSG00000126698.9.vs.ENSG00000169403.10	-0.00787292	-0.00516331	0.34612
ENSG00000126698.9.vs.ENSG00000270605.1	-0.0103735	-0.150295	0.158198
ENSG00000126746.16.vs.ENSG00000139200.12	-0.00906111	0.0179167	0.852716
ENSG00000126759.11.vs.ENSG00000126767.16	-0.0940007	-0.00193114	0.614999
ENSG00000126883.15.vs.ENSG00000126878.11	0.00790271	-0.003549	0.651019
ENSG00000126953.5.vs.ENSG00000270813.2	-0.0215218	1.06709	0.606232
ENSG00000127022.13.vs.ENSG00000161021.10	-0.000153465	0.0157231	0.162213
ENSG00000127191.16.vs.ENSG00000213590.2	-0.00761356	0.324964	0.313123
ENSG00000127241.15.vs.ENSG00000198491.3	0.0707277	-10.5747	0.00103725
ENSG00000127337.5.vs.ENSG00000090382.5	-0.00559626	-0.00412728	0.185215
ENSG00000127364.3.vs.ENSG00000270923.1	0.386511	-0.223208	0.0867922
ENSG00000127366.5.vs.ENSG00000127364.3	-0.32306	0.473698	0.060465
ENSG00000127366.5.vs.ENSG00000270923.1	-0.438919	1.7124	0.131281
ENSG00000127412.5.vs.ENSG00000197993.6	2.04192	-0.00153671	0.393094
ENSG00000127511.8.vs.ENSG00000127533.3	0.00282159	-0.0489669	0.581796
ENSG00000127540.10.vs.ENSG00000071564.13	-0.00786636	-0.00238557	0.396325
ENSG00000127540.10.vs.ENSG00000071655.16	-0.00912824	0.00201348	0.430125
ENSG00000127578.6.vs.ENSG00000102854.13	0.0337861	0.00469363	0.102281
ENSG00000127585.10.vs.ENSG00000127580.14	-0.0292531	-0.0178959	0.728021
ENSG00000127884.4.vs.ENSG00000148803.10	-0.00387972	0.0204659	0.25197
ENSG00000127957.15.vs.ENSG00000127946.15	0.0213068	0.00185783	0.947528
ENSG00000128000.14.vs.ENSG00000269069.1	0.0370167	-0.608832	0.295171
ENSG00000128159.10.vs.ENSG00000273137.1	0.00162669	-0.205917	0.759285
ENSG00000128191.12.vs.ENSG00000099901.15	0.00753887	-0.00840036	0.129411
ENSG00000128218.7.vs.ENSG00000187792.4	-0.0376042	0.0263153	0.575235
ENSG00000128228.4.vs.ENSG00000100023.16	-0.0214159	-0.00927243	0.121342
ENSG00000128228.4.vs.ENSG00000161180.9	-0.024821	0.245196	0.138603
ENSG00000128242.11.vs.ENSG00000214491.7	0.0263576	-0.0659028	0.338139
ENSG00000128272.13.vs.ENSG00000100335.11	-0.00533389	0.0168347	0.093594
ENSG00000128294.14.vs.ENSG00000100122.5	0.00463566	-1.05815	0.268504
ENSG00000128394.15.vs.ENSG00000243811.6	-0.0452302	-0.0385891	0.127517
ENSG00000128422.14.vs.ENSG00000186832.7	3.49831e-05	8.23028e-05	0.0911928
ENSG00000128564.6.vs.ENSG00000167011.7	-0.515012	5.29796	0.697992
ENSG00000128567.15.vs.ENSG00000273489.1	-0.00149771	0.557182	0.0086907
ENSG00000128578.8.vs.ENSG00000158467.15	0.00666261	-0.00109257	0.961192
ENSG00000128591.14.vs.ENSG00000128596.15	-0.000431548	0.0208651	0.87836
ENSG00000128607.12.vs.ENSG00000229196.3	0.00871898	0.0457645	0.76305
ENSG00000128610.10.vs.ENSG00000081803.14	0.0391581	0.020845	0.224702
ENSG00000128710.5.vs.ENSG00000128709.11	0.0219566	-0.0186392	0.57301
ENSG00000128710.5.vs.ENSG00000170178.6	0.0141212	0.0816289	0.698229
ENSG00000128713.12.vs.ENSG00000128714.5	0.0157893	-0.0008454	0.941955
ENSG00000128713.12.vs.ENSG00000170178.6	0.00989579	0.371972	0.914146
ENSG00000128714.5.vs.ENSG00000170178.6	0.00190882	0.458121	0.931059
ENSG00000128739.19.vs.ENSG00000279192.1	-0.00699926	0.0363967	0.0148609
ENSG00000128928.7.vs.ENSG00000140320.10	-0.00899677	0.00377152	0.496859
ENSG00000128944.12.vs.ENSG00000140323.5	-0.0264632	0.0254805	0.248538
ENSG00000129103.16.vs.ENSG00000206603.1	0.00472508	3.05067	0.0157914
ENSG00000129158.9.vs.ENSG00000129167.8	-0.0957812	-0.00237115	0.11968
ENSG00000129315.8.vs.ENSG00000139620.11	0.0427137	-0.0621606	0.00918824
ENSG00000129354.10.vs.ENSG00000129347.18	-0.00461016	0.00240309	0.489754
ENSG00000129354.10.vs.ENSG00000129355.6	-0.00383207	-0.0294107	0.321591
ENSG00000129450.7.vs.ENSG00000168995.12	0.200394	-0.688845	0.16407
ENSG00000129451.10.vs.ENSG00000186474.14	0.00374021	-0.0556512	0.00702945
ENSG00000129451.10.vs.ENSG00000213022.5	0.00094916	0.323434	0.086535
ENSG00000129451.10.vs.ENSG00000269741.4	0.000855922	0.0155062	0.0777824
ENSG00000129646.12.vs.ENSG00000161542.15	0.0874033	0.0100071	0.0141995
ENSG00000129757.11.vs.ENSG00000254827.4	0.00602511	-0.0304558	0.0330089
ENSG00000129911.7.vs.ENSG00000079313.10	-0.0142989	-0.010192	0.346463
ENSG00000129946.9.vs.ENSG00000181781.8	-0.00929895	-1.39926	0.675733
ENSG00000129946.9.vs.ENSG00000183186.6	-0.0132875	0.0217939	0.804172
ENSG00000129991.11.vs.ENSG00000105048.15	-0.100772	0.0153103	0.330175
ENSG00000130005.10.vs.ENSG00000280486.1	-0.0130538	3.60942	0.0381337
ENSG00000130203.8.vs.ENSG00000130208.8	-0.000903584	-0.00159397	0.445702
ENSG00000130270.15.vs.ENSG00000079313.10	-0.050093	-0.016183	0.460575
ENSG00000130307.10.vs.ENSG00000160113.5	0.0183387	-0.00396848	0.505994
ENSG00000130402.10.vs.ENSG00000267892.1	-5.04825e-05	-0.323803	0.387856
ENSG00000130427.2.vs.ENSG00000146839.17	-0.243409	1.39873	0.273409
ENSG00000130433.6.vs.ENSG00000142408.2	-0.815511	0.667153	0.253928
ENSG00000130475.13.vs.ENSG00000179913.9	-0.0118424	-0.00241617	0.461178
ENSG00000130489.11.vs.ENSG00000177989.12	0.00481299	-0.0345731	0.146068
ENSG00000130511.14.vs.ENSG00000268199.2	-0.0115841	-3.20627	0.325767
ENSG00000130517.12.vs.ENSG00000130513.6	0.00133087	-0.00132608	0.378474
ENSG00000130545.14.vs.ENSG00000275234.1	-0.0327931	0.0314999	0.346745
ENSG00000130561.15.vs.ENSG00000077044.8	0.694799	-0.000606777	0.0166266
ENSG00000130598.14.vs.ENSG00000149043.15	0.00221431	-0.000430373	0.714349
ENSG00000130643.7.vs.ENSG00000226699.1	-0.493963	-0.152733	0.839548
ENSG00000130643.7.vs.ENSG00000230306.1	-0.475909	-0.19369	0.741218
ENSG00000130684.12.vs.ENSG00000236542.1	-0.0666218	0.695863	0.698967
ENSG00000130702.12.vs.ENSG00000226332.2	2.39817e-05	0.00556307	0.963374
ENSG00000130703.14.vs.ENSG00000130706.11	-4.14865e-05	-0.00447219	0.405478
ENSG00000130717.11.vs.ENSG00000230289.1	-0.0103501	0.000754671	0.751884
ENSG00000130723.16.vs.ENSG00000130714.14	0.00419507	-0.0292855	0.108549
ENSG00000130779.18.vs.ENSG00000139719.8	0.00498411	-0.0231517	0.25343
ENSG00000130783.12.vs.ENSG00000206914.1	0.239624	0.771627	0.0190764
ENSG00000130787.12.vs.ENSG00000130783.12	-0.00342709	0.264515	0.0130674
ENSG00000130812.9.vs.ENSG00000267387.1	-0.746855	-0.866567	0.330632
ENSG00000130881.12.vs.ENSG00000166359.9	-0.00139121	0.38927	0.00734278
ENSG00000130943.6.vs.ENSG00000205643.9	0.657076	-0.0393726	0.00346758
ENSG00000130958.10.vs.ENSG00000165244.6	-0.0109187	0.0127883	0.617389
ENSG00000130985.15.vs.ENSG00000102225.14	-0.00125403	0.00624566	0.463041
ENSG00000130997.15.vs.ENSG00000123933.13	0.0187936	-0.00667365	0.605508
ENSG00000131127.12.vs.ENSG00000281016.1	0.0494007	0.114973	0.0343612
ENSG00000131183.9.vs.ENSG00000169220.16	0.224384	0.00136095	0.943678
ENSG00000131183.9.vs.ENSG00000198055.9	0.238964	-0.000958855	0.94271
ENSG00000131188.10.vs.ENSG00000198055.9	-0.0108062	-0.000718944	0.969858
ENSG00000131203.11.vs.ENSG00000188676.12	-0.00362072	-0.722314	0.266984
ENSG00000131233.9.vs.ENSG00000158315.9	1.80168	0.00817011	0.103913
ENSG00000131263.11.vs.ENSG00000230673.3	0.019227	-0.408634	0.124456
ENSG00000131379.8.vs.ENSG00000154781.14	0.112197	-0.037216	0.30493
ENSG00000131381.11.vs.ENSG00000131368.6	-0.00389558	-0.00514736	0.621678
ENSG00000131408.12.vs.ENSG00000062822.11	-0.0174583	-0.00889851	0.0292806
ENSG00000131459.11.vs.ENSG00000050748.16	0.0160124	0.016724	0.0828818
ENSG00000131469.11.vs.ENSG00000068079.6	-0.000581332	-0.000352041	0.69201
ENSG00000131475.5.vs.ENSG00000126562.15	-0.0044797	0.0318597	0.512103
ENSG00000131591.16.vs.ENSG00000237330.2	-0.0113179	-0.0384599	0.119345
ENSG00000131748.14.vs.ENSG00000141744.3	-0.0107733	0.0331028	0.0279746
ENSG00000131759.16.vs.ENSG00000094804.8	0.00499336	-0.000982535	0.836678
ENSG00000131759.16.vs.ENSG00000266208.1	0.00533882	-0.00308273	0.802562
ENSG00000131966.12.vs.ENSG00000100567.11	0.000742392	-0.0076339	0.418636
ENSG00000131969.13.vs.ENSG00000258745.1	0.398688	-0.0152998	0.000417852
ENSG00000132004.11.vs.ENSG00000095059.14	0.00818568	-0.0278712	0.0633216
ENSG00000132004.11.vs.ENSG00000105576.14	-0.0396853	0.00119814	0.468799
ENSG00000132155.10.vs.ENSG00000274514.1	-0.00128931	2.40623	0.610519
ENSG00000132185.15.vs.ENSG00000162746.13	-0.014268	-0.00728006	0.43196
ENSG00000132205.9.vs.ENSG00000272625.1	-0.00496287	1.03958	0.163165
ENSG00000132326.10.vs.ENSG00000144485.9	0.00629394	-0.0269823	0.600183
ENSG00000132388.11.vs.ENSG00000185722.15	-0.00764497	-0.00212321	0.659768
ENSG00000132405.17.vs.ENSG00000173011.11	0.0244944	-0.0530737	0.0416481
ENSG00000132464.10.vs.ENSG00000132467.3	-1.02709	-0.0195598	0.531235
ENSG00000132510.9.vs.ENSG00000182224.10	-0.0123135	0.0900466	0.203175
ENSG00000132510.9.vs.ENSG00000183914.13	-0.00822881	-0.130332	0.0630456
ENSG00000132510.9.vs.ENSG00000280046.1	-0.0128998	0.14694	0.135963
ENSG00000132535.17.vs.ENSG00000199053.2	7.33357e-05	-1.35569	0.808856
ENSG00000132554.18.vs.ENSG00000156509.12	0.33306	0.0755494	0.347387
ENSG00000132561.12.vs.ENSG00000243504.1	0.00341653	0.457578	0.160648
ENSG00000132561.12.vs.ENSG00000245970.2	0.00340357	-0.043139	0.106101
ENSG00000132563.14.vs.ENSG00000120733.12	0.0270261	0.00883957	0.0695321
ENSG00000132570.13.vs.ENSG00000113621.13	0.0808978	-0.00530077	0.0815044
ENSG00000132612.15.vs.ENSG00000168807.15	0.0023173	0.00960301	0.596764
ENSG00000132670.19.vs.ENSG00000125901.5	-0.00289082	-0.00916668	0.221907
ENSG00000132680.9.vs.ENSG00000143622.9	-0.00386617	0.00555755	0.836346
ENSG00000132688.10.vs.ENSG00000229953.1	0.00580726	0.0802686	0.253525
ENSG00000132746.13.vs.ENSG00000239559.2	0.00170454	-0.37528	0.484913
ENSG00000132881.10.vs.ENSG00000233929.1	0.0610066	-0.752311	0.723253
ENSG00000132912.11.vs.ENSG00000086589.10	0.0143231	-0.0108875	0.252817
ENSG00000132953.15.vs.ENSG00000150456.9	0.00678049	-0.0461478	0.572935
ENSG00000133055.7.vs.ENSG00000133048.11	1.09265	-0.00117725	0.700351
ENSG00000133104.11.vs.ENSG00000242715.6	0.00667626	0.0340147	0.327851
ENSG00000133104.11.vs.ENSG00000250709.1	0.0106579	-0.636701	0.366913
ENSG00000133138.18.vs.ENSG00000133135.12	0.0609112	0.00208399	0.0316974
ENSG00000133142.16.vs.ENSG00000279894.1	-0.00408061	0.552498	0.0263965
ENSG00000133193.11.vs.ENSG00000277728.1	0.0257889	0.555827	0.00976262
ENSG00000133243.7.vs.ENSG00000099875.13	-0.00624012	-0.00302561	0.08832
ENSG00000133250.12.vs.ENSG00000133246.10	-0.0562889	-0.274169	0.0403422
ENSG00000133250.12.vs.ENSG00000142347.15	-0.0653746	-0.0222368	0.0701515
ENSG00000133265.9.vs.ENSG00000105063.17	-0.0135255	-0.00610271	0.131444
ENSG00000133393.11.vs.ENSG00000133392.15	-0.012934	-5.9003e-05	0.682922
ENSG00000133657.13.vs.ENSG00000178732.5	0.0055684	-0.339448	0.0578633
ENSG00000133706.16.vs.ENSG00000173261.7	0.00624584	0.216999	0.0496189
ENSG00000133789.13.vs.ENSG00000239470.3	-0.0054612	-0.0643485	0.655904
ENSG00000133789.13.vs.ENSG00000246273.5	-0.00752641	0.12576	0.0427411
ENSG00000133961.18.vs.ENSG00000258944.1	0.00398178	-0.466742	0.713006
ENSG00000133962.6.vs.ENSG00000279286.2	0.0808449	-0.63259	0.740724
ENSG00000133983.13.vs.ENSG00000213463.4	-0.0613034	0.0232813	0.0837272
ENSG00000134058.9.vs.ENSG00000134056.10	-0.00722087	-0.0492934	0.158993
ENSG00000134070.4.vs.ENSG00000157014.9	-0.0115423	-0.00384034	0.261369
ENSG00000134201.9.vs.ENSG00000134184.11	-0.051079	0.000365555	0.49541
ENSG00000134242.14.vs.ENSG00000188761.10	-0.100672	0.00295091	0.163745
ENSG00000134243.10.vs.ENSG00000143106.11	0.00658837	-0.00804407	0.0559374
ENSG00000134245.16.vs.ENSG00000143079.13	0.0429923	0.00119258	0.737553
ENSG00000134285.9.vs.ENSG00000134287.8	-0.0049683	-0.00018801	0.857458
ENSG00000134285.9.vs.ENSG00000281789.1	-0.00435117	0.873207	0.0627919
ENSG00000134287.8.vs.ENSG00000281789.1	0.000588303	0.911808	0.069459
ENSG00000134330.17.vs.ENSG00000239300.4	-0.00642477	0.485844	0.207171
ENSG00000134333.12.vs.ENSG00000166796.10	-0.000251592	0.111745	0.645147
ENSG00000134375.9.vs.ENSG00000238003.1	-0.0100066	-3.32369	0.400724
ENSG00000134398.11.vs.ENSG00000261266.2	-0.0040637	1.10108	0.778725
ENSG00000134780.8.vs.ENSG00000124920.12	0.00226457	-0.0107198	0.784398
ENSG00000134827.6.vs.ENSG00000134812.6	-0.00844015	-0.656406	0.363929
ENSG00000134830.5.vs.ENSG00000134815.17	-0.21063	-0.0259743	0.10402
ENSG00000134884.12.vs.ENSG00000125266.6	0.00157122	0.00145461	0.649351
ENSG00000135070.12.vs.ENSG00000187753.11	0.0112202	3.32491	0.0115688
ENSG00000135114.11.vs.ENSG00000157895.10	0.000396814	-0.01378	0.925947
ENSG00000135248.14.vs.ENSG00000128595.15	-0.179929	0.00254572	0.29559
ENSG00000135249.6.vs.ENSG00000223886.3	-0.0128801	-0.611608	0.644592
ENSG00000135249.6.vs.ENSG00000272604.1	-0.00923144	-0.100871	0.875679
ENSG00000135250.15.vs.ENSG00000272918.1	0.0108237	0.182789	0.0434874
ENSG00000135372.7.vs.ENSG00000135387.18	-0.00970659	-6.68804e-06	0.44047
ENSG00000135407.9.vs.ENSG00000175215.8	0.0361993	0.00333534	0.205418
ENSG00000135436.7.vs.ENSG00000257964.1	-0.251793	3.59076	0.00568881
ENSG00000135452.8.vs.ENSG00000255737.2	0.00235836	0.0100699	0.770895
ENSG00000135457.8.vs.ENSG00000110925.5	-0.00552865	-0.00796474	0.701655
ENSG00000135506.14.vs.ENSG00000255737.2	0.000974408	0.00786956	0.662995
ENSG00000135605.11.vs.ENSG00000074966.9	-0.0508035	-0.0212833	0.860797
ENSG00000135740.15.vs.ENSG00000196155.11	-0.0576156	0.00631502	0.298705
ENSG00000135821.15.vs.ENSG00000203730.2	0.000503493	2.54481	0.00249148
ENSG00000135828.10.vs.ENSG00000143333.6	0.047335	-0.0051604	0.065872
ENSG00000135838.12.vs.ENSG00000135829.15	-0.000172638	0.0012024	0.938311
ENSG00000135925.7.vs.ENSG00000115596.3	0.00954446	0.0107335	0.145855
ENSG00000136059.13.vs.ENSG00000200579.1	-0.00394948	1.40871	0.224554
ENSG00000136114.14.vs.ENSG00000136100.11	-0.000204518	0.0132381	0.162587
ENSG00000136147.15.vs.ENSG00000236577.1	-0.00785414	-0.196578	0.7727
ENSG00000136240.8.vs.ENSG00000231359.3	-0.000357741	-0.0599248	0.970643
ENSG00000136273.10.vs.ENSG00000164744.11	0.0197766	0.691246	0.274356
ENSG00000136485.13.vs.ENSG00000136463.7	0.00433835	-0.0039104	0.372486
ENSG00000136485.13.vs.ENSG00000173826.13	0.00407907	-0.109396	0.360651
ENSG00000136535.13.vs.ENSG00000271924.1	-0.207179	0.220241	0.759551
ENSG00000136628.16.vs.ENSG00000196660.9	-0.00132866	0.0259227	0.933152
ENSG00000136631.11.vs.ENSG00000023902.12	-0.00756958	-0.00841049	0.108779
ENSG00000136695.13.vs.ENSG00000136697.11	-0.00424177	1.03113	5.12579e-07
ENSG00000136807.10.vs.ENSG00000136877.13	-0.00177919	-0.00539393	0.593202
ENSG00000136811.15.vs.ENSG00000119392.13	-0.00640864	0.0105469	0.67898
ENSG00000136811.15.vs.ENSG00000228510.2	-0.00122905	0.751241	0.858887
ENSG00000136819.13.vs.ENSG00000136827.11	-0.0122816	0.00983353	0.517445
ENSG00000136828.17.vs.ENSG00000136895.17	0.0277119	-0.0335674	0.0194007
ENSG00000136840.17.vs.ENSG00000160408.13	-0.0122871	0.000502118	0.774647
ENSG00000136840.17.vs.ENSG00000167103.10	-0.00903851	-0.0331703	0.689888
ENSG00000136856.16.vs.ENSG00000136895.17	0.0026704	-0.0176931	0.898083
ENSG00000136877.13.vs.ENSG00000225032.4	-0.00644654	0.00972452	0.594717
ENSG00000136883.11.vs.ENSG00000106927.10	0.0169314	-0.27286	0.189387
ENSG00000136908.16.vs.ENSG00000167103.10	-6.7203e-05	-0.0437436	0.80164
ENSG00000136908.16.vs.ENSG00000167106.10	-0.000478681	-0.00444598	0.562933
ENSG00000136932.12.vs.ENSG00000136929.11	-0.0117866	-0.0433982	0.969098
ENSG00000136982.5.vs.ENSG00000064313.10	-0.0614976	0.0222987	0.0966151
ENSG00000137054.14.vs.ENSG00000234160.1	-0.0339679	0.364019	0.261591
ENSG00000137090.10.vs.ENSG00000064218.4	0.257996	0.145345	0.440113
ENSG00000137098.12.vs.ENSG00000204930.8	-0.239009	0.98794	0.160946
ENSG00000137135.16.vs.ENSG00000137078.7	-0.00484533	-0.0742887	0.538353
ENSG00000137135.16.vs.ENSG00000198467.12	-0.00817376	-0.000218969	0.876978
ENSG00000137145.19.vs.ENSG00000273226.1	0.0104597	-0.171602	0.0438504
ENSG00000137154.11.vs.ENSG00000272842.1	-0.000278525	0.0271611	0.300818
ENSG00000137161.15.vs.ENSG00000231113.2	-0.00766061	0.165377	0.23988
ENSG00000137204.13.vs.ENSG00000146216.10	-0.114092	0.0747584	0.632651
ENSG00000137207.10.vs.ENSG00000271754.1	0.000321952	-1.40438	0.272098
ENSG00000137275.12.vs.ENSG00000137274.11	-0.00848117	-0.00192515	0.750086
ENSG00000137331.11.vs.ENSG00000201988.2	-0.00607849	-2.27938	0.158793
ENSG00000137337.13.vs.ENSG00000137404.13	-0.00344752	0.000240465	0.915185
ENSG00000137337.13.vs.ENSG00000272540.1	0.00329155	-0.74005	0.555898
ENSG00000137460.7.vs.ENSG00000231841.1	0.0149982	0.821976	0.216563
ENSG00000137486.15.vs.ENSG00000279117.1	-0.00302901	0.0225625	0.379939
ENSG00000137496.16.vs.ENSG00000251143.1	-0.0168344	0.331808	0.283725
ENSG00000137504.12.vs.ENSG00000179071.4	-0.00612295	0.26454	0.44941
ENSG00000137561.4.vs.ENSG00000137563.10	0.0715293	0.00101222	0.703036
ENSG00000137709.8.vs.ENSG00000181264.7	0.0150651	0.0532336	0.092289
ENSG00000137709.8.vs.ENSG00000184232.7	0.0225532	-0.00230296	0.368086
ENSG00000137752.21.vs.ENSG00000137757.9	-0.00112895	-0.311659	0.603425
ENSG00000137752.21.vs.ENSG00000204397.6	-0.000482839	-0.0242358	0.669293
ENSG00000137802.12.vs.ENSG00000243708.7	0.011713	-0.00608225	0.49531
ENSG00000137817.15.vs.ENSG00000067225.16	0.00261319	-0.000170828	0.6895
ENSG00000137825.9.vs.ENSG00000137815.13	0.00192033	-0.00819831	0.57211
ENSG00000137875.4.vs.ENSG00000069966.17	0.0303723	-0.0285709	0.337021
ENSG00000137875.4.vs.ENSG00000259712.1	-0.0272312	0.816734	0.33275
ENSG00000137876.8.vs.ENSG00000279145.1	-0.0243486	0.551553	0.00387339
ENSG00000137880.5.vs.ENSG00000188277.9	-0.0628454	0.0250397	0.565444
ENSG00000137959.14.vs.ENSG00000137965.9	-0.00602576	0.00497934	0.667858
ENSG00000137965.9.vs.ENSG00000238015.2	-0.00259552	4.33058	0.56665
ENSG00000138036.17.vs.ENSG00000152527.12	-0.0591961	-0.0327591	0.102505
ENSG00000138079.12.vs.ENSG00000226972.2	0.051102	-0.235044	0.222672
ENSG00000138271.5.vs.ENSG00000181631.6	0.00739214	-0.247562	0.0902434
ENSG00000138279.14.vs.ENSG00000229659.1	-0.004183	-0.692494	0.146621
ENSG00000138303.16.vs.ENSG00000107742.11	0.000842402	-0.019465	0.137447
ENSG00000138315.11.vs.ENSG00000156026.13	0.589141	-0.0237174	0.0298532
ENSG00000138346.13.vs.ENSG00000204130.11	-0.0231525	0.0565599	0.0964953
ENSG00000138378.16.vs.ENSG00000280083.1	-0.0620801	3.36315	0.239989
ENSG00000138381.8.vs.ENSG00000151687.13	-0.00135411	0.150807	0.139435
ENSG00000138468.14.vs.ENSG00000081148.11	0.0227554	0.117868	0.572911
ENSG00000138613.12.vs.ENSG00000166128.11	-0.0152434	-0.0187283	0.346388
ENSG00000138615.5.vs.ENSG00000166855.8	-0.00169834	-0.00877601	0.755498
ENSG00000138641.14.vs.ENSG00000248019.2	-0.00507319	0.0343437	0.853232
ENSG00000138759.16.vs.ENSG00000138772.11	0.0065366	-0.00081069	0.104199
ENSG00000138778.10.vs.ENSG00000164039.13	0.0183672	0.00698852	0.21667
ENSG00000138794.8.vs.ENSG00000123739.9	0.00300294	0.0119989	0.611815
ENSG00000138834.11.vs.ENSG00000206053.11	-0.000901712	0.00597669	0.247305
ENSG00000139112.9.vs.ENSG00000134539.15	0.00593267	-0.0714459	0.287512
ENSG00000139131.11.vs.ENSG00000276148.1	-0.0307129	0.00331058	0.360693
ENSG00000139289.12.vs.ENSG00000187109.12	-0.00220414	-0.00337194	0.0583273
ENSG00000139508.13.vs.ENSG00000233588.1	0.00482554	1.90518	0.469991
ENSG00000139549.2.vs.ENSG00000139636.14	-0.986305	-0.013256	0.219725
ENSG00000139572.3.vs.ENSG00000161642.16	-0.164258	-0.00108029	0.266913
ENSG00000139597.15.vs.ENSG00000244754.7	-0.0334339	0.00595876	0.334824
ENSG00000139610.1.vs.ENSG00000110934.9	-1.81546	-0.028151	0.438948
ENSG00000139610.1.vs.ENSG00000139629.14	-5.65879	0.000768219	0.64014
ENSG00000139626.14.vs.ENSG00000172819.15	-0.16539	0.00034899	0.0960408
ENSG00000139726.9.vs.ENSG00000130783.12	-0.00306659	0.270778	0.0223097
ENSG00000139890.8.vs.ENSG00000197324.7	-0.295086	-0.000873233	0.652129
ENSG00000139914.6.vs.ENSG00000092010.13	-0.649304	-0.00548191	0.0124994
ENSG00000139998.13.vs.ENSG00000176153.11	0.00232285	-0.000476958	0.687808
ENSG00000140067.6.vs.ENSG00000258987.1	-0.336741	-1.06511	0.63321
ENSG00000140307.9.vs.ENSG00000140299.10	-0.0448568	-0.00627408	0.0246653
ENSG00000140326.11.vs.ENSG00000128881.15	-0.0748169	0.0140498	0.193886
ENSG00000140367.10.vs.ENSG00000167196.12	0.019161	0.00401617	0.168336
ENSG00000140386.11.vs.ENSG00000259514.1	0.0314463	0.640388	0.00083943
ENSG00000140455.15.vs.ENSG00000197361.6	-0.00559582	-0.045411	0.680659
ENSG00000140545.13.vs.ENSG00000140511.10	0.00137174	-0.00596488	0.683576
ENSG00000140553.15.vs.ENSG00000196547.13	-0.00549567	-0.00161821	0.571307
ENSG00000140575.11.vs.ENSG00000259262.1	0.000266077	3.52627	0.154339
ENSG00000140853.14.vs.ENSG00000087237.9	-0.00605778	-0.0252402	0.336525
ENSG00000140854.11.vs.ENSG00000276166.1	-0.00353302	0.129336	0.975856
ENSG00000140905.8.vs.ENSG00000166473.15	-0.117914	0.130657	0.0781796
ENSG00000140950.14.vs.ENSG00000261286.1	-0.00433872	0.0471576	0.828204
ENSG00000140961.11.vs.ENSG00000103154.8	-0.0108436	-0.252485	0.655138
ENSG00000140983.12.vs.ENSG00000103269.12	-0.00963758	0.127199	0.103174
ENSG00000140990.13.vs.ENSG00000179580.8	-0.0115059	6.09257	0.0270915
ENSG00000140992.17.vs.ENSG00000162066.13	0.0154585	-0.0163264	0.610898
ENSG00000140995.15.vs.ENSG00000258947.5	-0.00428777	-0.0178012	0.703071
ENSG00000141002.17.vs.ENSG00000204991.9	-0.0076156	0.00302005	0.250045
ENSG00000141030.11.vs.ENSG00000154803.11	-0.00618173	0.028002	0.186132
ENSG00000141030.11.vs.ENSG00000264187.1	-0.00121895	0.666011	0.974771
ENSG00000141068.12.vs.ENSG00000168961.15	0.00590117	-0.00218769	0.540322
ENSG00000141096.4.vs.ENSG00000167261.12	-2.94415	-0.00206514	0.436985
ENSG00000141101.11.vs.ENSG00000260290.2	0.00113338	-0.836992	0.75026
ENSG00000141198.12.vs.ENSG00000275710.1	0.00131692	1.68943	0.174067
ENSG00000141298.16.vs.ENSG00000167549.17	0.000980266	0.00931025	0.722468
ENSG00000141391.12.vs.ENSG00000267199.1	-0.0352092	0.318628	0.893778
ENSG00000141503.14.vs.ENSG00000205710.3	-0.0035455	-0.02112	0.585333
ENSG00000141574.6.vs.ENSG00000173762.6	-0.00238266	-0.00860279	0.469245
ENSG00000141738.12.vs.ENSG00000141736.12	0.000173037	2.93018e-05	0.987864
ENSG00000141854.6.vs.ENSG00000228887.3	-0.0192799	-0.315867	0.358061
ENSG00000141858.10.vs.ENSG00000188032.8	-0.010282	1.74023	0.0631459
ENSG00000141956.12.vs.ENSG00000157617.15	0.000417448	0.00257626	0.896772
ENSG00000141959.15.vs.ENSG00000184441.4	-0.00158928	0.00520413	0.673542
ENSG00000141985.8.vs.ENSG00000269318.1	-0.00433736	0.572033	0.188688
ENSG00000141985.8.vs.ENSG00000269807.1	-0.00374709	1.3438	0.49588
ENSG00000142002.15.vs.ENSG00000074842.6	-0.0148008	-0.00420463	0.0412326
ENSG00000142188.15.vs.ENSG00000177692.10	-0.0143508	0.295057	0.27612
ENSG00000142188.15.vs.ENSG00000231355.1	-0.0101357	4.11802	0.00783659
ENSG00000142252.9.vs.ENSG00000104859.13	-0.00373972	-0.0227501	0.0633637
ENSG00000142303.12.vs.ENSG00000142347.15	0.000947062	-0.0201752	0.261554
ENSG00000142303.12.vs.ENSG00000279396.1	-0.0236037	-0.42281	0.705212
ENSG00000142319.17.vs.ENSG00000279908.1	-0.362952	-0.644871	0.491436
ENSG00000142327.10.vs.ENSG00000188542.8	-0.00737488	0.141452	0.219637
ENSG00000142515.13.vs.ENSG00000267968.1	0.00547489	1.44884	0.208482
ENSG00000142534.5.vs.ENSG00000142541.15	-0.00094924	-6.16523e-05	0.0326872
ENSG00000142556.17.vs.ENSG00000197619.12	0.0220247	-0.0450148	0.526061
ENSG00000142556.17.vs.ENSG00000256087.5	0.0497262	-0.0166446	0.323305
ENSG00000142609.16.vs.ENSG00000178821.11	0.301099	-0.166905	0.00167627
ENSG00000142609.16.vs.ENSG00000233542.1	0.2238	0.861859	0.000724429
ENSG00000142615.7.vs.ENSG00000162438.10	-1.16464	0.871952	0.0721369
ENSG00000142623.9.vs.ENSG00000142619.4	-0.000745349	-0.000351443	0.897117
ENSG00000142675.16.vs.ENSG00000142684.7	-0.0064906	0.000682549	0.659567
ENSG00000142677.3.vs.ENSG00000142661.17	0.0212772	-0.0095771	0.602215
ENSG00000142684.7.vs.ENSG00000197245.4	-0.0073542	-0.407973	0.217525
ENSG00000142748.11.vs.ENSG00000142733.13	-0.109635	0.00218752	0.696951
ENSG00000142748.11.vs.ENSG00000174950.9	-0.10796	0.0528691	0.703401
ENSG00000142959.4.vs.ENSG00000234093.3	-0.114793	-0.876251	0.657783
ENSG00000143061.16.vs.ENSG00000116815.14	0.00314193	-0.0238519	0.290631
ENSG00000143093.13.vs.ENSG00000168710.16	-0.0193353	-0.00230912	0.426764
ENSG00000143093.13.vs.ENSG00000258673.1	-0.023649	1.30189	0.369176
ENSG00000143107.7.vs.ENSG00000116266.9	-0.273484	-0.0257695	0.265609
ENSG00000143199.16.vs.ENSG00000143158.9	0.105327	-0.000657689	0.0233332
ENSG00000143217.8.vs.ENSG00000186517.12	0.000877388	-0.0119205	0.277898
ENSG00000143224.16.vs.ENSG00000143222.10	0.00821958	-0.00258357	0.714443
ENSG00000143315.6.vs.ENSG00000177807.6	-0.0065583	-0.0569727	0.720084
ENSG00000143318.11.vs.ENSG00000132681.15	0.017101	-0.0259183	0.173715
ENSG00000143318.11.vs.ENSG00000162734.11	0.00513325	-0.00137143	0.539307
ENSG00000143320.7.vs.ENSG00000223356.1	7.71979e-05	1.2107	0.420272
ENSG00000143367.14.vs.ENSG00000143375.13	-0.00279609	0.001002	0.836484
ENSG00000143368.9.vs.ENSG00000159164.8	-0.00335025	0.0142517	0.482363
ENSG00000143376.11.vs.ENSG00000227045.1	-0.00367171	1.71058	0.875915
ENSG00000143379.11.vs.ENSG00000231073.1	-0.00660771	0.170011	0.785373
ENSG00000143384.11.vs.ENSG00000274963.1	-0.00126446	0.598202	0.0618069
ENSG00000143384.11.vs.ENSG00000277452.1	-0.00121884	0.831447	0.0397473
ENSG00000143398.18.vs.ENSG00000159352.14	-0.0013622	-0.000731064	0.864997
ENSG00000143412.8.vs.ENSG00000231073.1	0.00084938	-0.405956	0.974499
ENSG00000143437.19.vs.ENSG00000143387.11	-0.00224202	-0.00132295	0.75275
ENSG00000143437.19.vs.ENSG00000224800.1	7.91984e-05	-4.85656	0.692363
ENSG00000143452.14.vs.ENSG00000163131.9	0.00895443	-0.00356622	0.245623
ENSG00000143545.7.vs.ENSG00000143552.8	0.00291548	1.37304	0.00367445
ENSG00000143546.8.vs.ENSG00000224784.2	0.000103505	-0.170222	0.314604
ENSG00000143549.18.vs.ENSG00000163263.6	-0.000978341	-5.85449	0.246045
ENSG00000143614.7.vs.ENSG00000198837.8	0.0277765	-0.0127267	0.160198
ENSG00000143622.9.vs.ENSG00000207475.1	0.00403728	2.0679	0.00396691
ENSG00000143653.9.vs.ENSG00000260855.1	-0.00123568	0.107995	0.0534955
ENSG00000143793.11.vs.ENSG00000162910.17	-0.00775864	-0.00604025	0.561027
ENSG00000143793.11.vs.ENSG00000224566.2	-0.0148211	-0.0936869	0.557681
ENSG00000143811.15.vs.ENSG00000243709.1	-0.00506149	0.0642742	0.224504
ENSG00000143845.13.vs.ENSG00000143839.13	-7.76407e-05	0.00465123	0.0575791
ENSG00000143847.14.vs.ENSG00000163444.10	0.00233448	-0.00891457	0.922005
ENSG00000143862.6.vs.ENSG00000143851.14	-0.0238746	-0.025849	0.0382922
ENSG00000143952.18.vs.ENSG00000251775.1	-0.0250395	2.25801	0.0688677
ENSG00000143977.12.vs.ENSG00000035141.6	-0.00373961	-0.0127395	0.213976
ENSG00000144028.13.vs.ENSG00000230747.1	0.00043811	-0.872697	0.725331
ENSG00000144045.12.vs.ENSG00000115289.11	0.0207927	-0.0472787	0.183555
ENSG00000144045.12.vs.ENSG00000115318.10	0.0155697	-0.00601598	0.620463
ENSG00000144061.11.vs.ENSG00000144063.3	-0.0287764	0.0122927	0.59747
ENSG00000144061.11.vs.ENSG00000175701.9	-0.0379585	-0.00159629	0.868107
ENSG00000144230.15.vs.ENSG00000169994.17	0.142085	0.0112446	0.355644
ENSG00000144488.13.vs.ENSG00000168427.8	-0.083908	-0.415553	0.281801
ENSG00000144550.11.vs.ENSG00000163719.17	0.427222	-0.0186296	0.129197
ENSG00000144579.6.vs.ENSG00000018280.15	-0.00287882	-0.0225134	0.234884
ENSG00000144671.9.vs.ENSG00000172940.10	-0.470559	2.35436	0.0648108
ENSG00000144713.11.vs.ENSG00000272263.1	-0.000771488	0.814544	0.233497
ENSG00000144744.15.vs.ENSG00000144747.13	0.00405068	0.016835	0.00209547
ENSG00000144791.8.vs.ENSG00000011376.8	0.00225538	0.00646918	0.00105041
ENSG00000144815.13.vs.ENSG00000182504.9	0.00985795	0.058607	0.0228689
ENSG00000144827.7.vs.ENSG00000144824.18	0.00793625	0.00327841	0.382258
ENSG00000144827.7.vs.ENSG00000144834.11	0.00637219	0.0160618	0.87903
ENSG00000144867.10.vs.ENSG00000091513.13	0.0106299	0.00080252	0.000222044
ENSG00000144868.12.vs.ENSG00000170819.4	0.0207044	-1.43154	0.530497
ENSG00000145050.14.vs.ENSG00000259956.1	-0.0062208	0.00615321	0.263193
ENSG00000145107.14.vs.ENSG00000163960.10	0.00703824	0.0198231	0.0322756
ENSG00000145569.5.vs.ENSG00000248791.1	0.00152056	0.279482	0.0172064
ENSG00000145685.12.vs.ENSG00000113273.14	-0.0172414	0.0414822	0.239705
ENSG00000145730.19.vs.ENSG00000175749.11	0.00484751	-3.59614	0.377898
ENSG00000145757.14.vs.ENSG00000250240.4	-0.151906	2.10462	0.569408
ENSG00000145833.14.vs.ENSG00000164615.4	0.00355721	-0.00406611	0.927643
ENSG00000145861.7.vs.ENSG00000135083.13	0.138779	0.00668385	0.396839
ENSG00000145879.9.vs.ENSG00000204909.6	-0.07813	3.04472	5.66963e-10
ENSG00000145879.9.vs.ENSG00000249834.3	0.0198426	2.97538	0.363464
ENSG00000145911.5.vs.ENSG00000145916.17	-0.0164496	0.00756816	0.784749
ENSG00000146001.5.vs.ENSG00000120327.6	0.597011	0.0431514	0.0307838
ENSG00000146001.5.vs.ENSG00000262096.2	0.101244	1.37602	0.0341253
ENSG00000146083.10.vs.ENSG00000243959.3	-0.00129304	2.01497	0.784715
ENSG00000146112.10.vs.ENSG00000204560.8	-0.00119115	-0.0188619	0.190026
ENSG00000146221.9.vs.ENSG00000124608.4	-0.284338	-0.00957919	0.869214
ENSG00000146285.12.vs.ENSG00000280135.1	0.083942	-0.664346	0.746573
ENSG00000146409.9.vs.ENSG00000112303.12	-0.0213265	-0.0774282	0.208886
ENSG00000146410.10.vs.ENSG00000029363.14	-0.0389958	-0.00344691	0.550253
ENSG00000146410.10.vs.ENSG00000237596.5	-0.0454639	0.133739	0.392661
ENSG00000146416.15.vs.ENSG00000217648.1	0.00231212	-0.0052183	0.90136
ENSG00000146426.16.vs.ENSG00000171217.5	-0.0564742	0.725581	0.0265731
ENSG00000146576.11.vs.ENSG00000236609.3	-0.035391	-0.000905883	0.242387
ENSG00000146729.8.vs.ENSG00000178665.13	0.00235686	0.0755544	0.573314
ENSG00000146859.6.vs.ENSG00000272941.1	-0.0502033	0.581741	0.00254569
ENSG00000146872.16.vs.ENSG00000087995.14	0.0563127	-0.0727744	0.0343377
ENSG00000146918.18.vs.ENSG00000224324.1	-0.000480942	3.57813	0.0538896
ENSG00000147036.10.vs.ENSG00000047597.5	-0.0436551	0.0145267	0.610557
ENSG00000147099.18.vs.ENSG00000067177.13	-0.00100312	0.0235419	0.397019
ENSG00000147162.12.vs.ENSG00000147174.10	0.00100401	0.0105336	0.671421
ENSG00000147439.10.vs.ENSG00000253200.1	-0.0406303	0.0409092	0.634499
ENSG00000147457.12.vs.ENSG00000104679.9	-0.0300856	0.0198117	0.263721
ENSG00000147471.10.vs.ENSG00000020181.16	0.000259834	0.00364642	0.758981
ENSG00000147586.8.vs.ENSG00000076554.14	-0.043203	0.00348836	0.484791
ENSG00000147601.12.vs.ENSG00000253636.1	-0.0190131	0.104325	0.228964
ENSG00000147604.12.vs.ENSG00000250295.5	-0.0013622	0.0360955	0.00543071
ENSG00000147650.10.vs.ENSG00000279138.1	0.00807061	0.317053	0.625649
ENSG00000147654.13.vs.ENSG00000205038.10	-0.00151287	-0.861302	0.440712
ENSG00000147669.9.vs.ENSG00000104450.11	-0.00961539	0.00839102	0.483535
ENSG00000147804.8.vs.ENSG00000160948.12	0.00213919	-0.00125932	0.623298
ENSG00000147872.8.vs.ENSG00000147874.9	3.83433e-05	-0.0166527	0.488779
ENSG00000147912.11.vs.ENSG00000175768.11	-0.0118944	-0.0144638	0.563197
ENSG00000148180.15.vs.ENSG00000243738.3	-0.000341578	4.01988	0.00444552
ENSG00000148200.15.vs.ENSG00000136931.8	0.0746938	-0.875958	0.0305246
ENSG00000148225.14.vs.ENSG00000165188.12	0.163469	-0.0316522	0.0444586
ENSG00000148296.6.vs.ENSG00000201451.1	-0.00261425	3.50862	0.458499
ENSG00000148308.16.vs.ENSG00000196205.8	0.000122115	-0.0215149	0.233178
ENSG00000148335.13.vs.ENSG00000234789.1	0.00527296	1.09157	0.69017
ENSG00000148346.10.vs.ENSG00000171159.4	5.24459e-05	-0.00324548	0.692247
ENSG00000148362.9.vs.ENSG00000107317.10	-0.00833944	-0.00672023	0.246357
ENSG00000148362.9.vs.ENSG00000214402.6	-0.00581144	-3.40618	0.114202
ENSG00000148399.10.vs.ENSG00000165724.5	-0.0205035	0.00252429	0.509178
ENSG00000148483.8.vs.ENSG00000260314.2	-0.117935	-0.0090057	0.576433
ENSG00000148484.16.vs.ENSG00000107611.13	-0.00192302	0.0900374	0.859149
ENSG00000148600.13.vs.ENSG00000188373.4	0.0454082	-0.000274992	0.000254573
ENSG00000148730.6.vs.ENSG00000280401.1	0.00335956	0.0647709	0.0182492
ENSG00000148803.10.vs.ENSG00000226699.1	0.00406143	-0.302187	0.944607
ENSG00000148832.13.vs.ENSG00000148824.17	-0.0563852	0.00318277	0.546145
ENSG00000148948.6.vs.ENSG00000279675.1	-0.686488	8.83583	0.16969
ENSG00000148965.7.vs.ENSG00000134339.7	-1.76455	0.00921233	0.322681
ENSG00000149182.13.vs.ENSG00000275208.1	-0.00701323	-9.1801	0.199998
ENSG00000149196.14.vs.ENSG00000255222.1	-0.0204997	-4.47791	0.199992
ENSG00000149243.14.vs.ENSG00000158555.13	-0.0464287	-0.0590825	0.131584
ENSG00000149260.13.vs.ENSG00000137474.18	0.00160459	-0.00904047	0.644673
ENSG00000149262.15.vs.ENSG00000241782.1	-0.0183989	1.17996	0.0116578
ENSG00000149262.15.vs.ENSG00000254459.1	-0.0120557	1.01813	0.0991094
ENSG00000149262.15.vs.ENSG00000255449.1	-0.0189163	0.79699	0.00843473
ENSG00000149300.8.vs.ENSG00000170276.5	3.21074	-0.267467	0.0153411
ENSG00000149480.5.vs.ENSG00000149016.14	-0.00378636	-0.0141591	0.475933
ENSG00000149489.7.vs.ENSG00000254964.1	-0.109251	5.62552	0.271037
ENSG00000149531.13.vs.ENSG00000221319.1	0.0351084	4.62927	0.0273826
ENSG00000149541.8.vs.ENSG00000089597.15	-0.00102573	-0.000865723	0.791377
ENSG00000149541.8.vs.ENSG00000149499.10	0.00681014	-0.0170144	0.251544
ENSG00000149564.10.vs.ENSG00000255045.1	-0.000573866	0.0431229	0.994042
ENSG00000149575.5.vs.ENSG00000177098.7	-0.311548	0.0774667	0.00371394
ENSG00000149577.14.vs.ENSG00000280143.1	-0.00156834	-0.0101132	0.826976
ENSG00000149591.15.vs.ENSG00000149577.14	-0.000146576	-0.00221723	0.879737
ENSG00000149634.4.vs.ENSG00000271984.1	0.128918	0.59767	0.720296
ENSG00000149639.13.vs.ENSG00000149636.14	0.0120563	-0.00158656	0.204324
ENSG00000149646.11.vs.ENSG00000025293.14	-0.0964688	0.00531047	0.897077
ENSG00000149656.7.vs.ENSG00000203880.10	-4.89677	0.00796879	0.390981
ENSG00000149782.10.vs.ENSG00000173486.11	0.00201753	-0.00528895	0.450114
ENSG00000149798.4.vs.ENSG00000014138.7	-0.0100246	0.00359132	0.79386
ENSG00000150281.6.vs.ENSG00000260083.1	-0.0271737	-0.0848034	0.426205
ENSG00000150768.14.vs.ENSG00000150764.12	-6.24178e-05	-0.000657279	0.99861
ENSG00000150783.8.vs.ENSG00000197580.10	2.27525	0.0338196	0.0182384
ENSG00000150783.8.vs.ENSG00000214264.4	1.53882	1.92194	0.00590249
ENSG00000150787.6.vs.ENSG00000197580.10	-0.00306716	0.0542728	0.380345
ENSG00000151117.7.vs.ENSG00000254966.1	0.010837	0.844428	0.0913295
ENSG00000151376.15.vs.ENSG00000278989.1	-0.00442021	0.185553	0.862105
ENSG00000151651.14.vs.ENSG00000130640.12	-0.00101185	-0.0100303	0.377085
ENSG00000152253.7.vs.ENSG00000073734.8	0.00112379	0.0828736	0.960066
ENSG00000152443.11.vs.ENSG00000264453.1	0.0174714	2.23972	0.170765
ENSG00000152454.3.vs.ENSG00000196724.11	0.0465634	0.0494165	0.304083
ENSG00000152454.3.vs.ENSG00000243234.1	0.0803166	-2.06634	0.401359
ENSG00000152467.8.vs.ENSG00000176293.18	-0.0379471	0.0442751	0.686586
ENSG00000152556.14.vs.ENSG00000274124.1	0.003586	5.28834	0.0287462
ENSG00000152595.15.vs.ENSG00000029559.6	0.433635	0.0113122	0.859292
ENSG00000152672.6.vs.ENSG00000116031.8	-0.35198	0.0318578	0.562941
ENSG00000153002.10.vs.ENSG00000163751.3	-3.18889	-0.012505	0.5293
ENSG00000153093.17.vs.ENSG00000153094.20	-0.00457491	-0.0059994	0.805992
ENSG00000153113.22.vs.ENSG00000248734.2	0.00119867	-0.197672	0.742043
ENSG00000153208.15.vs.ENSG00000236307.2	0.00014638	1.99021	0.123575
ENSG00000153283.11.vs.ENSG00000240891.5	-0.0119481	0.031398	0.237467
ENSG00000153363.11.vs.ENSG00000082512.13	0.0478421	-0.0255822	0.182916
ENSG00000153363.11.vs.ENSG00000238137.2	0.0365739	-0.180522	0.627897
ENSG00000153790.10.vs.ENSG00000172115.7	0.0243315	-0.00129502	0.838106
ENSG00000153982.9.vs.ENSG00000167447.11	0.061741	0.00550616	0.194088
ENSG00000154025.14.vs.ENSG00000279825.1	0.110232	1.47653	0.455473
ENSG00000154059.8.vs.ENSG00000134489.6	-0.016155	-1.37352	0.591446
ENSG00000154079.5.vs.ENSG00000082269.15	0.0068966	0.0354452	0.03261
ENSG00000154143.2.vs.ENSG00000154144.11	0.0881566	-0.0156705	0.796605
ENSG00000154252.11.vs.ENSG00000180902.15	0.0873754	-0.000173938	0.282084
ENSG00000154262.11.vs.ENSG00000154263.16	-0.00305742	-0.0208238	0.475622
ENSG00000154274.13.vs.ENSG00000174145.7	-0.00806226	0.0511601	0.384452
ENSG00000154316.13.vs.ENSG00000177710.5	-0.00535876	-6.02214	0.174144
ENSG00000154328.14.vs.ENSG00000079459.11	-0.0303723	-0.0011812	0.429543
ENSG00000154328.14.vs.ENSG00000136574.16	-0.0380269	0.0646384	0.100967
ENSG00000154328.14.vs.ENSG00000227203.3	-0.0389341	2.11562	0.357187
ENSG00000154473.16.vs.ENSG00000188816.3	-0.00327214	-0.694964	0.391317
ENSG00000154589.5.vs.ENSG00000253833.1	-0.0477746	-0.245169	0.531328
ENSG00000154719.12.vs.ENSG00000260583.1	-0.031028	-0.29383	0.319573
ENSG00000154760.12.vs.ENSG00000172123.11	0.00134405	0.00428957	0.954786
ENSG00000155066.14.vs.ENSG00000115041.11	0.00124687	0.0161945	0.340927
ENSG00000155070.8.vs.ENSG00000205897.5	-0.172264	2.31182	0.0010528
ENSG00000155307.16.vs.ENSG00000243440.5	-0.0689463	0.362042	0.072191
ENSG00000155366.15.vs.ENSG00000225075.1	-0.00188738	-0.924842	0.51314
ENSG00000155495.8.vs.ENSG00000165509.12	-0.14584	-0.0795378	0.773726
ENSG00000155506.15.vs.ENSG00000277039.1	0.00159514	2.61936	0.574363
ENSG00000155542.10.vs.ENSG00000271828.1	-0.0971627	1.07846	0.0642852
ENSG00000155545.18.vs.ENSG00000225230.1	-0.0225496	9.76718	0.131182
ENSG00000155640.6.vs.ENSG00000231025.1	0.0273792	-0.0142002	0.624626
ENSG00000155754.13.vs.ENSG00000155755.17	0.0577071	-0.00381154	0.886694
ENSG00000156219.15.vs.ENSG00000245928.2	-0.847766	1.98915	0.176757
ENSG00000156253.5.vs.ENSG00000176054.6	0.00660615	0.384833	0.821342
ENSG00000156304.13.vs.ENSG00000273271.1	0.00432477	0.0478765	0.886009
ENSG00000156413.12.vs.ENSG00000171124.11	-0.0172085	0.000977301	0.730344
ENSG00000156486.7.vs.ENSG00000272321.1	1.25991	-1.45731	0.0115763
ENSG00000156502.12.vs.ENSG00000122958.13	-0.0191646	0.00250833	0.733946
ENSG00000156515.20.vs.ENSG00000156510.12	-0.000980398	-0.00391838	0.884442
ENSG00000156521.12.vs.ENSG00000042286.13	0.00515645	-0.00679646	0.728177
ENSG00000156587.14.vs.ENSG00000240371.1	-0.0024799	-0.868301	0.37355
ENSG00000156860.14.vs.ENSG00000156858.10	0.00777033	-0.0274735	0.216675
ENSG00000156973.12.vs.ENSG00000237641.1	-0.0638205	-0.674397	0.170387
ENSG00000156983.14.vs.ENSG00000114026.20	-0.025305	0.00607713	0.420836
ENSG00000156983.14.vs.ENSG00000144550.11	-0.0236927	0.466893	0.230384
ENSG00000157014.9.vs.ENSG00000231177.4	-0.0104966	0.259798	0.109296
ENSG00000157014.9.vs.ENSG00000240288.6	-0.0113031	0.169677	0.0854827
ENSG00000157020.16.vs.ENSG00000157087.15	-0.00419009	0.0330514	0.514144
ENSG00000157077.13.vs.ENSG00000272100.1	0.00558685	-0.672802	0.612941
ENSG00000157214.12.vs.ENSG00000105792.18	-0.00506131	0.0430153	0.333141
ENSG00000157306.13.vs.ENSG00000129460.14	-0.0829535	-0.0293967	0.359857
ENSG00000157315.4.vs.ENSG00000132604.9	0.234782	0.00741469	0.692751
ENSG00000157322.15.vs.ENSG00000198373.11	0.519157	0.00711248	0.41003
ENSG00000157399.13.vs.ENSG00000006756.14	0.0528734	0.000965873	0.355413
ENSG00000157510.12.vs.ENSG00000164284.13	0.0195527	0.00597413	0.0321221
ENSG00000157856.9.vs.ENSG00000138018.16	-0.228422	-0.00399266	0.799007
ENSG00000157873.16.vs.ENSG00000225931.3	-0.00406171	-0.357779	0.591674
ENSG00000157881.12.vs.ENSG00000197921.5	-0.044738	-0.00300927	0.291075
ENSG00000157992.11.vs.ENSG00000235267.1	0.00151977	1.69494	0.387766
ENSG00000158014.13.vs.ENSG00000158022.6	0.00968519	-0.0107613	0.00257038
ENSG00000158042.8.vs.ENSG00000241678.1	-0.00668391	-7.42477	0.140576
ENSG00000158050.4.vs.ENSG00000188886.3	-0.000483066	-0.343321	0.539888
ENSG00000158158.10.vs.ENSG00000168763.14	-0.00520868	0.00793474	0.926741
ENSG00000158161.14.vs.ENSG00000228589.3	-0.00971584	-0.697975	0.414367
ENSG00000158163.13.vs.ENSG00000118017.3	0.0158979	2.7964	0.116264
ENSG00000158296.12.vs.ENSG00000149635.2	0.00063884	0.544236	0.990482
ENSG00000158315.9.vs.ENSG00000274944.3	0.00307855	0.494655	0.0855809
ENSG00000158373.8.vs.ENSG00000168298.5	-0.00707998	0.0119658	0.0378648
ENSG00000158417.9.vs.ENSG00000273306.1	0.000307225	0.844588	0.254967
ENSG00000158428.3.vs.ENSG00000230580.1	-0.781113	0.362368	0.591807
ENSG00000158516.10.vs.ENSG00000128510.9	-0.985767	-0.00137366	0.604816
ENSG00000158552.11.vs.ENSG00000144567.9	0.00605913	0.00141289	0.838221
ENSG00000158560.13.vs.ENSG00000279067.1	0.0240122	1.18948	0.110438
ENSG00000158604.13.vs.ENSG00000136271.9	0.000779123	-0.00383159	0.820201
ENSG00000158623.13.vs.ENSG00000270823.1	-0.0118122	1.46623	0.0232111
ENSG00000158710.13.vs.ENSG00000085552.15	-9.47596e-05	0.000872066	0.85963
ENSG00000158710.13.vs.ENSG00000279430.1	0.000185113	-8.93273	0.185543
ENSG00000158747.12.vs.ENSG00000158748.3	-0.00103372	-0.107243	0.858418
ENSG00000158796.15.vs.ENSG00000238934.1	-0.00464403	6.0861	0.125518
ENSG00000158806.12.vs.ENSG00000158815.9	0.0646433	-0.105224	0.187148
ENSG00000158859.9.vs.ENSG00000158850.13	-0.00959734	-0.00226327	0.344013
ENSG00000158863.20.vs.ENSG00000158856.16	-0.00869285	-0.00135522	0.381209
ENSG00000158869.9.vs.ENSG00000158882.11	-0.0105177	0.000328027	0.260863
ENSG00000158874.10.vs.ENSG00000143257.10	0.000192274	0.115634	0.00461233
ENSG00000158941.15.vs.ENSG00000120913.22	-0.0039276	0.00424941	0.797402
ENSG00000159079.17.vs.ENSG00000242220.5	-0.0219809	0.861206	0.0548649
ENSG00000159173.17.vs.ENSG00000159166.12	0.0223988	0.000244158	0.820943
ENSG00000159189.10.vs.ENSG00000173372.15	0.000602981	-0.00252968	0.233939
ENSG00000159199.12.vs.ENSG00000270781.1	0.00301676	-0.563314	0.800956
ENSG00000159208.14.vs.ENSG00000266472.4	0.0308758	-0.00094716	0.27286
ENSG00000159231.5.vs.ENSG00000226054.2	-0.0044662	0.156201	0.775873
ENSG00000159314.10.vs.ENSG00000225190.7	-0.00692517	0.0280896	0.00858128
ENSG00000159339.12.vs.ENSG00000276747.1	0.0597656	3.01642	0.000982989
ENSG00000159346.11.vs.ENSG00000159348.11	-0.00182282	0.00192709	0.604285
ENSG00000159374.16.vs.ENSG00000115318.10	-0.00947016	-0.02073	0.911769
ENSG00000159433.10.vs.ENSG00000260490.2	0.0351701	-2.32496	0.187588
ENSG00000159433.10.vs.ENSG00000274403.1	0.0342675	0.358507	0.464215
ENSG00000159459.10.vs.ENSG00000205871.5	0.0149362	-0.186234	0.495174
ENSG00000159461.13.vs.ENSG00000272372.1	0.00426244	-0.449277	0.7386
ENSG00000159593.13.vs.ENSG00000249961.8	0.00784405	4.18461	0.134908
ENSG00000159625.13.vs.ENSG00000140854.11	-0.31871	-0.00269214	0.823729
ENSG00000159625.13.vs.ENSG00000182885.15	-0.303068	-0.0539014	0.695112
ENSG00000159640.13.vs.ENSG00000228979.4	-0.0279008	-1.92604	0.293264
ENSG00000159792.8.vs.ENSG00000038358.13	0.00703233	0.00600661	0.392446
ENSG00000159958.4.vs.ENSG00000234965.2	-0.0198558	0.150346	0.638129
ENSG00000160051.10.vs.ENSG00000084652.14	0.0323454	0.00686719	0.341739
ENSG00000160087.19.vs.ENSG00000184163.3	-0.0189892	0.00890356	0.168321
ENSG00000160094.13.vs.ENSG00000225313.4	-0.00225766	0.0314754	0.912699
ENSG00000160117.13.vs.ENSG00000130312.5	0.0226425	-0.0119618	0.592324
ENSG00000160182.2.vs.ENSG00000160183.12	-0.0231403	0.00133574	0.347732
ENSG00000160214.11.vs.ENSG00000234030.1	-0.000819123	3.51869	0.586181
ENSG00000160224.15.vs.ENSG00000141959.15	-3.95662	-0.00154648	0.420732
ENSG00000160271.13.vs.ENSG00000148288.10	-0.000450898	-0.0908378	0.175897
ENSG00000160318.5.vs.ENSG00000105374.8	-0.416749	-0.00668727	0.178223
ENSG00000160345.11.vs.ENSG00000226706.1	-0.0966057	0.0415955	0.231626
ENSG00000160408.13.vs.ENSG00000106992.16	-0.0150726	0.0583601	0.189126
ENSG00000160471.11.vs.ENSG00000095752.5	-0.0265373	0.0156258	0.0307065
ENSG00000160588.8.vs.ENSG00000160593.16	0.00266628	-0.0399461	0.197133
ENSG00000160633.11.vs.ENSG00000130255.11	-0.0131324	3.95373e-06	0.180254
ENSG00000160654.8.vs.ENSG00000110344.8	-0.0785975	0.019357	0.00301034
ENSG00000160688.17.vs.ENSG00000160685.12	-0.00356097	0.00495256	0.276962
ENSG00000160688.17.vs.ENSG00000264349.1	-5.90219e-05	-2.20589	0.795503
ENSG00000160703.14.vs.ENSG00000172367.14	0.0178246	0.0195185	0.110921
ENSG00000160746.11.vs.ENSG00000234617.1	-0.00157756	0.727632	0.803845
ENSG00000160746.11.vs.ENSG00000271941.1	-0.0030699	0.359094	0.577533
ENSG00000160766.13.vs.ENSG00000177628.14	0.0643907	0.00285855	0.508819
ENSG00000160767.19.vs.ENSG00000177628.14	-0.00505444	0.00504565	0.653189
ENSG00000160791.13.vs.ENSG00000121807.5	-0.0794361	0.0446889	0.0084875
ENSG00000160799.10.vs.ENSG00000273682.1	-0.00979339	2.37964	0.190649
ENSG00000160870.11.vs.ENSG00000106258.12	0.0188102	0.00205479	0.000790875
ENSG00000160991.14.vs.ENSG00000128563.12	-0.00865362	-0.0083915	0.520872
ENSG00000161031.11.vs.ENSG00000105122.11	0.0384128	-0.0264631	0.177823
ENSG00000161048.10.vs.ENSG00000236848.2	0.0237952	0.697923	0.0247
ENSG00000161180.9.vs.ENSG00000185651.13	0.0892986	-0.0111354	0.171358
ENSG00000161202.16.vs.ENSG00000161203.12	0.0015589	0.000270322	0.914083
ENSG00000161202.16.vs.ENSG00000228205.1	0.000616321	-0.358434	0.525007
ENSG00000161203.12.vs.ENSG00000161204.10	-0.000149452	0.00574441	0.838362
ENSG00000161249.19.vs.ENSG00000188508.9	-0.000453499	0.00172785	0.684339
ENSG00000161249.19.vs.ENSG00000189001.9	-0.000764852	0.00155952	0.304363
ENSG00000161267.10.vs.ENSG00000213519.2	-6.3947e-05	1.43017	0.545619
ENSG00000161281.9.vs.ENSG00000270760.1	-0.0320457	0.739613	0.448032
ENSG00000161513.10.vs.ENSG00000172782.10	-0.00897184	0.0265623	0.0395501
ENSG00000161642.16.vs.ENSG00000161638.9	-0.000665264	0.000563089	0.603907
ENSG00000161654.8.vs.ENSG00000221044.2	0.00631737	3.26894	0.0123225
ENSG00000161664.5.vs.ENSG00000125319.13	0.392307	-0.0148528	0.0385086
ENSG00000161677.10.vs.ENSG00000131409.11	-0.00641065	-0.0133993	0.79962
ENSG00000161798.6.vs.ENSG00000086159.11	-0.174894	-0.0127911	0.4535
ENSG00000161798.6.vs.ENSG00000167580.6	-0.17874	0.667915	0.416779
ENSG00000161835.9.vs.ENSG00000123358.18	-0.0357668	-0.000533334	0.48678
ENSG00000161835.9.vs.ENSG00000135503.11	-0.0403753	3.57179e-05	0.521029
ENSG00000161850.2.vs.ENSG00000161849.3	1.27339	-0.0024798	5.12907e-08
ENSG00000161860.7.vs.ENSG00000179115.9	-0.134861	-0.000372709	0.771504
ENSG00000161888.10.vs.ENSG00000197256.9	-0.00397073	0.000356577	0.946794
ENSG00000161896.9.vs.ENSG00000137288.8	-0.00695595	-0.0124235	0.384625
ENSG00000161912.16.vs.ENSG00000001167.13	0.0276521	-0.00967853	0.250291
ENSG00000161920.8.vs.ENSG00000141480.16	-0.0497261	-0.0120987	0.0785038
ENSG00000161956.11.vs.ENSG00000129226.12	-0.024865	-0.135426	0.2353
ENSG00000161956.11.vs.ENSG00000239697.9	-0.0210609	-0.0430245	0.0345172
ENSG00000161999.10.vs.ENSG00000127585.10	-0.0175807	-0.0301769	0.347943
ENSG00000162032.14.vs.ENSG00000103024.6	-0.109284	-0.0135594	0.164282
ENSG00000162065.10.vs.ENSG00000185883.9	-0.0152625	-0.0174155	0.386098
ENSG00000162066.13.vs.ENSG00000279520.1	-0.0191947	0.0311794	0.813079
ENSG00000162194.11.vs.ENSG00000162191.12	-0.027141	-0.010518	0.108396
ENSG00000162194.11.vs.ENSG00000185085.2	-0.0397431	-0.00738881	0.704428
ENSG00000162399.6.vs.ENSG00000143001.4	1.8416	-0.614295	0.135274
ENSG00000162458.11.vs.ENSG00000224321.1	0.000794417	0.100348	0.939467
ENSG00000162460.6.vs.ENSG00000162458.11	0.174914	0.00105019	0.264395
ENSG00000162482.4.vs.ENSG00000211454.12	0.0106091	0.149038	0.891302
ENSG00000162511.7.vs.ENSG00000162510.5	-0.0020471	-0.382963	0.223837
ENSG00000162571.12.vs.ENSG00000198976.1	-0.488543	0.179739	0.372642
ENSG00000162571.12.vs.ENSG00000207607.2	-0.368743	0.0656534	0.627209
ENSG00000162571.12.vs.ENSG00000207730.2	-0.382901	0.290737	0.558345
ENSG00000162576.15.vs.ENSG00000107404.16	0.00130917	-0.00801694	0.175657
ENSG00000162592.7.vs.ENSG00000235169.6	2.61044	-0.100995	0.254409
ENSG00000162614.17.vs.ENSG00000180488.13	-0.00755954	0.0128715	0.609689
ENSG00000162645.11.vs.ENSG00000234518.2	-0.00210629	-0.00681794	0.343739
ENSG00000162650.14.vs.ENSG00000143028.8	-0.0482195	-0.0500457	0.404731
ENSG00000162650.14.vs.ENSG00000174151.13	-0.0500342	0.00840054	0.390391
ENSG00000162723.8.vs.ENSG00000085552.15	0.202501	4.99865e-06	0.492038
ENSG00000162728.4.vs.ENSG00000225279.1	0.689506	0.189007	0.878707
ENSG00000162733.15.vs.ENSG00000132196.12	0.000779423	-0.0117461	0.878467
ENSG00000162735.17.vs.ENSG00000224261.2	-0.0046481	0.0445381	0.520864
ENSG00000162757.4.vs.ENSG00000117595.9	0.0110374	-0.000385701	0.336798
ENSG00000162779.19.vs.ENSG00000057252.11	0.00227364	0.00519767	0.507722
ENSG00000162782.14.vs.ENSG00000227141.2	0.0706548	-0.356378	0.00227437
ENSG00000162881.6.vs.ENSG00000162882.13	0.196115	-0.107389	0.147998
ENSG00000162882.13.vs.ENSG00000226491.1	-0.051789	0.890659	0.314897
ENSG00000162892.14.vs.ENSG00000226945.1	0.053853	-5.05027	0.000353249
ENSG00000162892.14.vs.ENSG00000271680.1	0.0535031	-5.82845	0.000188697
ENSG00000162896.5.vs.ENSG00000162894.10	0.00045822	-0.0115676	0.597703
ENSG00000162910.17.vs.ENSG00000224566.2	-0.010411	-0.129106	0.526035
ENSG00000162927.12.vs.ENSG00000232713.2	0.022771	-0.0926327	0.836587
ENSG00000162927.12.vs.ENSG00000237522.1	0.0129842	0.0199258	0.86146
ENSG00000162931.10.vs.ENSG00000168148.3	0.0028075	2.97431	0.509803
ENSG00000163009.7.vs.ENSG00000171848.12	0.103013	-0.000914456	0.702119
ENSG00000163013.10.vs.ENSG00000135625.7	0.00344213	-0.149809	0.698932
ENSG00000163017.12.vs.ENSG00000114956.18	-0.000204723	-0.0161134	0.21261
ENSG00000163050.15.vs.ENSG00000143801.15	0.00897385	-0.0146511	0.404596
ENSG00000163069.11.vs.ENSG00000188993.3	0.00382294	0.10443	0.885489
ENSG00000163125.14.vs.ENSG00000117360.11	0.00656712	-0.00835595	0.559886
ENSG00000163159.10.vs.ENSG00000163155.10	-0.00917184	0.00541702	0.444601
ENSG00000163348.3.vs.ENSG00000268154.2	0.000400003	1.07505	0.928612
ENSG00000163352.5.vs.ENSG00000160685.12	1.38383	0.00500223	0.0210306
ENSG00000163382.10.vs.ENSG00000187862.10	0.000431571	-0.772215	0.391193
ENSG00000163382.10.vs.ENSG00000280316.1	-0.000441604	0.671479	0.880844
ENSG00000163435.14.vs.ENSG00000176393.9	-0.000442893	-0.00640333	0.233688
ENSG00000163435.14.vs.ENSG00000275207.1	-0.000879603	7.9068	0.0298297
ENSG00000163449.9.vs.ENSG00000079246.14	0.0226469	-0.00089804	0.891275
ENSG00000163466.14.vs.ENSG00000179921.13	-0.000473322	-0.24702	0.383225
ENSG00000163497.2.vs.ENSG00000163499.10	-0.400851	0.345151	0.144413
ENSG00000163530.4.vs.ENSG00000121570.11	0.104349	-0.24373	0.555853
ENSG00000163535.16.vs.ENSG00000138356.12	0.0119324	-0.0207943	0.782993
ENSG00000163565.17.vs.ENSG00000265589.2	0.00115395	-3.44834	0.297641
ENSG00000163611.10.vs.ENSG00000206530.7	-0.0102216	0.0147945	0.50123
ENSG00000163684.10.vs.ENSG00000168297.14	-0.00837446	0.00718606	0.871446
ENSG00000163703.16.vs.ENSG00000230082.1	-0.0129621	-0.0297951	0.464462
ENSG00000163735.6.vs.ENSG00000163736.3	-0.000278193	0.0314802	0.85825
ENSG00000163736.3.vs.ENSG00000163737.3	0.0175576	0.465235	0.512063
ENSG00000163738.17.vs.ENSG00000182585.8	-0.00404084	0.0192862	0.265207
ENSG00000163746.10.vs.ENSG00000279320.1	1.04298	-0.459869	0.00527185
ENSG00000163794.6.vs.ENSG00000115204.13	-0.0554002	-0.00959566	0.610367
ENSG00000163811.10.vs.ENSG00000189350.11	-0.00952875	-0.0111629	0.577626
ENSG00000163820.13.vs.ENSG00000163818.15	0.00802183	0.00700221	0.139458
ENSG00000163866.8.vs.ENSG00000116544.10	-0.0167275	-0.00806572	0.604734
ENSG00000163898.8.vs.ENSG00000163900.9	0.00282553	-0.00272181	0.863703
ENSG00000163939.17.vs.ENSG00000016864.15	0.00935684	-0.00607472	0.112466
ENSG00000163961.4.vs.ENSG00000214097.4	0.0174358	0.463635	0.353118
ENSG00000164081.11.vs.ENSG00000164082.13	0.000717029	0.100841	0.359005
ENSG00000164104.10.vs.ENSG00000248774.1	0.000228206	1.21428	0.139859
ENSG00000164144.13.vs.ENSG00000231841.1	0.00211095	1.23797	0.864055
ENSG00000164181.12.vs.ENSG00000250148.1	0.0126538	0.0389718	0.590787
ENSG00000164188.7.vs.ENSG00000152620.11	0.0215543	0.00142614	0.885857
ENSG00000164221.11.vs.ENSG00000243304.3	-0.0291365	-0.700874	0.794169
ENSG00000164237.7.vs.ENSG00000271980.1	0.00491048	0.258292	0.505737
ENSG00000164299.6.vs.ENSG00000244076.1	-0.191817	-5.97205	0.613282
ENSG00000164329.12.vs.ENSG00000164309.13	-0.0139185	0.00647232	0.471371
ENSG00000164414.15.vs.ENSG00000272514.4	-0.0364362	2.75889	0.104846
ENSG00000164434.10.vs.ENSG00000172594.11	-0.000391413	-0.0030257	0.805064
ENSG00000164535.13.vs.ENSG00000231359.3	-0.00861975	-0.0323415	0.876345
ENSG00000164591.12.vs.ENSG00000171992.11	-0.0217342	0.000439441	0.986976
ENSG00000164597.12.vs.ENSG00000272072.1	0.00251118	0.405002	0.1012
ENSG00000164604.11.vs.ENSG00000279288.1	-0.034415	3.72227	0.17908
ENSG00000164647.7.vs.ENSG00000157214.12	-0.0334607	0.0120221	0.157989
ENSG00000164663.12.vs.ENSG00000137218.9	0.0489871	-0.177373	0.0155122
ENSG00000164675.9.vs.ENSG00000128609.13	-0.0604436	-0.00979215	0.613627
ENSG00000164850.13.vs.ENSG00000224079.1	0.0351739	-0.0595151	0.809829
ENSG00000164889.11.vs.ENSG00000133612.17	0.00353607	-0.00216162	0.589459
ENSG00000164889.11.vs.ENSG00000197150.11	0.00533458	-0.00933739	0.638858
ENSG00000164889.11.vs.ENSG00000213199.6	0.00382454	-0.0946624	0.496591
ENSG00000164897.11.vs.ENSG00000244151.1	-0.00957173	-0.0499932	0.341687
ENSG00000164916.10.vs.ENSG00000242802.5	0.0090067	-0.00752564	0.229179
ENSG00000164941.12.vs.ENSG00000243979.2	0.00109799	3.70056	0.043962
ENSG00000164941.12.vs.ENSG00000272509.1	0.00016671	0.372332	0.315567
ENSG00000164967.8.vs.ENSG00000137100.14	-0.0161913	-0.00306787	0.4598
ENSG00000164967.8.vs.ENSG00000205143.2	-0.0242398	2.29733	0.120212
ENSG00000164976.8.vs.ENSG00000164972.11	0.00737154	0.0464583	0.674305
ENSG00000165028.10.vs.ENSG00000136783.9	0.184603	-0.0165961	0.356137
ENSG00000165066.12.vs.ENSG00000029534.18	-0.266211	0.0164299	0.658333
ENSG00000165071.13.vs.ENSG00000129295.7	0.00977793	0.024535	0.91093
ENSG00000165140.8.vs.ENSG00000130957.4	0.000375192	-0.046937	0.856333
ENSG00000165240.16.vs.ENSG00000131174.4	0.0247775	-0.00120047	0.0196323
ENSG00000165275.8.vs.ENSG00000070601.8	-0.0236482	-0.101594	0.744198
ENSG00000165406.14.vs.ENSG00000231964.1	0.000919988	0.0775731	0.686514
ENSG00000165458.12.vs.ENSG00000165457.12	-0.00154817	-0.019238	0.488299
ENSG00000165462.5.vs.ENSG00000228286.3	0.118793	-0.175006	0.912871
ENSG00000165474.5.vs.ENSG00000226633.2	1.88298e-06	0.240302	0.993802
ENSG00000165650.10.vs.ENSG00000277879.1	0.0277747	-0.443089	0.0362081
ENSG00000165661.14.vs.ENSG00000107187.14	0.0074088	-1.05397	0.821897
ENSG00000165684.3.vs.ENSG00000187796.12	-0.011547	0.00793014	0.801611
ENSG00000165704.13.vs.ENSG00000226107.1	0.00165827	0.24305	0.971626
ENSG00000165802.18.vs.ENSG00000188833.8	0.00229837	-0.229749	0.521792
ENSG00000165816.11.vs.ENSG00000095627.8	0.0428668	0.0648379	0.229407
ENSG00000165821.10.vs.ENSG00000165819.10	0.00940281	-0.00425118	0.858442
ENSG00000165912.14.vs.ENSG00000243802.2	-0.00280037	-0.634522	0.335046
ENSG00000165916.7.vs.ENSG00000255197.4	0.000708302	-0.663401	0.380219
ENSG00000165923.14.vs.ENSG00000109920.11	0.112652	-0.0109026	0.30578
ENSG00000165929.11.vs.ENSG00000140092.13	-0.00386961	-0.00950155	0.553719
ENSG00000165953.8.vs.ENSG00000170054.13	-0.131971	-0.0237148	0.774956
ENSG00000166024.12.vs.ENSG00000230928.1	-0.00532983	-0.252708	0.907242
ENSG00000166183.14.vs.ENSG00000207568.1	0.0174147	-1.33453	0.538817
ENSG00000166197.15.vs.ENSG00000148840.9	-0.00391583	0.00337597	0.664727
ENSG00000166250.10.vs.ENSG00000109971.12	0.000474404	7.713e-05	0.965695
ENSG00000166323.11.vs.ENSG00000178202.11	0.623659	0.00540448	0.00824679
ENSG00000166337.8.vs.ENSG00000166341.7	-0.0169772	0.00562867	0.108782
ENSG00000166343.8.vs.ENSG00000138279.14	0.045661	-0.00337906	0.683104
ENSG00000166439.5.vs.ENSG00000242999.3	0.0251067	1.67863	0.0944497
ENSG00000166510.12.vs.ENSG00000267112.1	-0.0305512	1.13909	0.693431
ENSG00000166529.13.vs.ENSG00000106261.15	0.0361601	0.00476294	0.490651
ENSG00000166557.11.vs.ENSG00000169330.7	0.00127899	0.00949796	0.873091
ENSG00000166592.10.vs.ENSG00000166589.11	-0.000643024	0.0203607	0.288504
ENSG00000166670.8.vs.ENSG00000196611.4	-0.00199888	0.000578115	0.627555
ENSG00000166670.8.vs.ENSG00000256254.1	-0.000107998	-1.33326	0.903608
ENSG00000166747.11.vs.ENSG00000040199.17	0.0131676	-0.00349941	0.00892192
ENSG00000166794.4.vs.ENSG00000169118.14	-0.00180738	0.0118504	0.486337
ENSG00000166796.10.vs.ENSG00000166800.8	0.109894	0.0650206	0.672835
ENSG00000166813.13.vs.ENSG00000166819.10	0.0215059	-0.0169491	0.589799
ENSG00000166819.10.vs.ENSG00000241362.2	-0.0248725	0.66904	0.267735
ENSG00000166822.11.vs.ENSG00000183196.7	0.0284967	0.0237314	0.0379988
ENSG00000166863.10.vs.ENSG00000166860.2	-9.33094e-06	0.0471692	0.193652
ENSG00000166896.6.vs.ENSG00000257159.1	0.0176465	2.63342	0.561733
ENSG00000166908.16.vs.ENSG00000155980.10	0.00532118	-0.0203395	0.650023
ENSG00000166908.16.vs.ENSG00000178498.14	0.00501559	0.00547112	0.563432
ENSG00000166908.16.vs.ENSG00000240771.5	0.00531552	0.00465366	0.624966
ENSG00000166912.15.vs.ENSG00000134160.12	0.0238605	0.92403	0.20158
ENSG00000166971.15.vs.ENSG00000279344.1	0.00523618	0.593115	0.139359
ENSG00000166971.15.vs.ENSG00000279722.1	-0.0124885	0.407644	0.0960198
ENSG00000166986.11.vs.ENSG00000111087.8	-0.00502834	-0.0581256	0.46326
ENSG00000167074.13.vs.ENSG00000100403.11	0.0274379	-0.00570912	0.00552451
ENSG00000167077.11.vs.ENSG00000100147.12	-0.136831	0.0419778	0.308115
ENSG00000167085.10.vs.ENSG00000229944.3	0.00265228	-1.06768	0.600963
ENSG00000167100.13.vs.ENSG00000108819.10	-0.000499154	0.00354616	0.170857
ENSG00000167100.13.vs.ENSG00000250282.1	-0.0724355	2.46463	0.0600358
ENSG00000167103.10.vs.ENSG00000167106.10	-0.043246	-0.00445685	0.476348
ENSG00000167107.11.vs.ENSG00000136444.8	-0.00159542	0.0157937	0.0658052
ENSG00000167118.9.vs.ENSG00000167114.11	-0.0108822	0.00581181	0.299243
ENSG00000167123.17.vs.ENSG00000228510.2	0.000215383	0.687923	0.864441
ENSG00000167130.16.vs.ENSG00000148343.17	0.0048934	-0.000385675	0.948898
ENSG00000167130.16.vs.ENSG00000234055.1	-0.000278432	3.69354	0.181041
ENSG00000167136.6.vs.ENSG00000107021.14	0.00506032	0.0120523	0.459972
ENSG00000167216.15.vs.ENSG00000267724.1	0.153642	0.296754	0.00314073
ENSG00000167220.10.vs.ENSG00000134049.4	0.00767597	-0.00287697	0.933022
ENSG00000167264.16.vs.ENSG00000072736.17	-0.00668854	0.0256643	0.32205
ENSG00000167355.6.vs.ENSG00000175518.6	0.132298	-0.323311	0.664573
ENSG00000167355.6.vs.ENSG00000183251.3	-0.0377647	0.274218	0.995749
ENSG00000167371.15.vs.ENSG00000079616.11	-0.0083607	0.000561114	0.96988
ENSG00000167371.15.vs.ENSG00000281348.1	-0.00753584	0.984728	0.930224
ENSG00000167384.9.vs.ENSG00000273777.3	-0.00442637	1.90362	0.075623
ENSG00000167397.13.vs.ENSG00000151006.7	-0.00863774	0.103062	0.630945
ENSG00000167414.4.vs.ENSG00000160013.7	-3.80801	-0.0284759	0.218316
ENSG00000167414.4.vs.ENSG00000279161.1	-4.50552	0.902132	0.923705
ENSG00000167460.13.vs.ENSG00000167461.10	-0.000209729	-0.0219396	0.361988
ENSG00000167470.11.vs.ENSG00000099624.6	-0.0014838	-0.00312201	0.567275
ENSG00000167483.16.vs.ENSG00000130309.9	-0.0305619	0.000705879	0.687012
ENSG00000167536.12.vs.ENSG00000109118.12	0.022178	-0.00859305	0.415301
ENSG00000167548.13.vs.ENSG00000167550.9	0.00865426	0.109919	0.109458
ENSG00000167554.13.vs.ENSG00000221923.7	0.039285	-0.0333381	0.542924
ENSG00000167614.12.vs.ENSG00000235681.1	-0.019503	0.581226	0.0981666
ENSG00000167619.10.vs.ENSG00000188368.8	-0.0658303	0.0700197	0.480966
ENSG00000167642.11.vs.ENSG00000200209.1	-0.000412628	4.53188	0.0687788
ENSG00000167644.10.vs.ENSG00000200209.1	-0.000613605	4.06877	0.0963211
ENSG00000167654.16.vs.ENSG00000077009.12	-0.113331	-1.88829	0.851587
ENSG00000167656.4.vs.ENSG00000180155.17	0.000217606	-0.00039548	0.585161
ENSG00000167657.10.vs.ENSG00000167658.14	-0.0062066	-0.000384277	0.198194
ENSG00000167670.14.vs.ENSG00000267769.1	-0.00229094	-0.292736	0.84026
ENSG00000167670.14.vs.ENSG00000280239.1	-0.00270816	-0.0171651	0.926579
ENSG00000167676.3.vs.ENSG00000214456.7	-0.00632605	-0.00826594	0.331909
ENSG00000167680.14.vs.ENSG00000171236.9	-0.0121417	-0.00373337	0.697283
ENSG00000167680.14.vs.ENSG00000214456.7	-0.0151315	-0.0124607	0.460962
ENSG00000167680.14.vs.ENSG00000267385.1	-0.0146615	-0.06272	0.781804
ENSG00000167693.15.vs.ENSG00000262434.1	0.000705778	4.51601	0.269622
ENSG00000167699.12.vs.ENSG00000262434.1	-0.0187078	5.29722	0.065953
ENSG00000167700.7.vs.ENSG00000160972.8	-0.0186596	0.00958118	0.400914
ENSG00000167700.7.vs.ENSG00000265393.1	-0.00894426	-0.931645	0.472446
ENSG00000167701.12.vs.ENSG00000167700.7	0.017227	-0.0149832	0.368383
ENSG00000167701.12.vs.ENSG00000265393.1	0.0134912	-1.32186	0.369409
ENSG00000167703.13.vs.ENSG00000174238.13	-0.000900189	-0.0178714	0.0819866
ENSG00000167711.12.vs.ENSG00000132386.9	0.015754	-0.00203704	0.0139629
ENSG00000167741.9.vs.ENSG00000132382.13	-0.00159745	-0.00799906	0.255503
ENSG00000167754.11.vs.ENSG00000167755.12	0.00303237	-0.00297234	0.506047
ENSG00000167757.12.vs.ENSG00000129451.10	-0.0203472	0.00709494	0.0640521
ENSG00000167757.12.vs.ENSG00000186474.14	0.00792332	-0.0365118	0.208257
ENSG00000167768.4.vs.ENSG00000189182.8	0.000274634	0.0444024	0.633715
ENSG00000167770.10.vs.ENSG00000176340.3	-0.00272476	-0.00393843	0.211768
ENSG00000167778.7.vs.ENSG00000257337.5	-0.00406183	0.0167248	0.792572
ENSG00000167780.10.vs.ENSG00000167779.6	0.302622	0.00146702	0.129271
ENSG00000167800.9.vs.ENSG00000132744.6	0.834436	-0.151918	0.134797
ENSG00000167800.9.vs.ENSG00000167799.8	0.365524	-0.00901738	0.361993
ENSG00000167874.6.vs.ENSG00000280046.1	-0.16579	0.093317	0.257724
ENSG00000167895.13.vs.ENSG00000187997.10	-0.023438	0.474711	0.157206
ENSG00000167914.9.vs.ENSG00000108344.13	0.00432795	0.001976	0.742492
ENSG00000167925.14.vs.ENSG00000089558.7	-0.00970971	-0.0611685	0.524242
ENSG00000167925.14.vs.ENSG00000173757.8	-0.0127323	0.00419475	0.557538
ENSG00000167930.14.vs.ENSG00000206168.1	-0.00233658	2.03107	0.772717
ENSG00000167967.14.vs.ENSG00000261663.1	-0.00493044	-0.173228	0.604282
ENSG00000167968.11.vs.ENSG00000261663.1	0.178187	-0.438269	0.0068859
ENSG00000167992.11.vs.ENSG00000167986.12	-0.0615247	0.000666815	0.745314
ENSG00000167994.10.vs.ENSG00000221968.7	0.00886726	-0.0130023	0.364229
ENSG00000168016.12.vs.ENSG00000281100.1	0.000359085	0.177298	0.00477398
ENSG00000168028.12.vs.ENSG00000144659.9	-0.000901907	-0.00197016	0.265189
ENSG00000168070.10.vs.ENSG00000149735.5	-2.41291	-3.61536	0.258183
ENSG00000168071.20.vs.ENSG00000162302.11	-0.0185368	-0.00125356	0.124514
ENSG00000168228.13.vs.ENSG00000053900.9	-0.142688	0.0015381	0.165554
ENSG00000168234.11.vs.ENSG00000154040.19	0.000619272	-0.0162805	0.881446
ENSG00000168255.17.vs.ENSG00000105808.16	0.0139149	-0.36571	0.655057
ENSG00000168259.13.vs.ENSG00000187595.13	0.00370683	0.106664	0.19729
ENSG00000168273.6.vs.ENSG00000010327.9	-0.010626	-0.00390569	0.437971
ENSG00000168297.14.vs.ENSG00000272182.1	0.0379526	-3.45954	0.130532
ENSG00000168298.5.vs.ENSG00000217159.2	0.00905998	0.845802	0.0481847
ENSG00000168309.15.vs.ENSG00000198643.5	-0.0882395	0.00544592	0.00248147
ENSG00000168395.13.vs.ENSG00000228989.1	-0.00529937	-0.0576484	0.667212
ENSG00000168439.15.vs.ENSG00000149781.11	-0.00305701	-0.0121445	0.116433
ENSG00000168453.13.vs.ENSG00000168476.10	0.00471629	-0.00725647	0.332104
ENSG00000168453.13.vs.ENSG00000275074.1	0.00300595	-0.0159661	0.588718
ENSG00000168703.5.vs.ENSG00000175121.10	0.0269851	-0.0132947	0.740954
ENSG00000168758.9.vs.ENSG00000163126.13	-0.00400589	0.0613881	0.701304
ENSG00000168758.9.vs.ENSG00000168754.12	-0.00390425	0.00526274	0.766281
ENSG00000168758.9.vs.ENSG00000213337.7	-0.00258615	-0.0330614	0.54701
ENSG00000168765.14.vs.ENSG00000235045.2	-0.00109448	0.119078	0.809872
ENSG00000168778.10.vs.ENSG00000185344.12	-0.0321331	-2.83909e-05	0.369334
ENSG00000168792.4.vs.ENSG00000108262.14	-0.0108729	-0.0016389	0.704328
ENSG00000168894.8.vs.ENSG00000168899.4	-0.00763589	-0.00836425	0.169627
ENSG00000168918.12.vs.ENSG00000085978.20	-0.0104937	-0.0245015	0.0803679
ENSG00000168993.13.vs.ENSG00000249592.4	-0.0206386	0.272363	0.0698255
ENSG00000169035.10.vs.ENSG00000167755.12	0.0108656	-0.00684635	0.106461
ENSG00000169045.16.vs.ENSG00000204661.8	-2.99965e-05	4.04777	0.244619
ENSG00000169057.18.vs.ENSG00000184216.10	0.00616718	-0.00089325	0.806007
ENSG00000169062.13.vs.ENSG00000130177.13	-0.0102776	-0.000907573	0.770125
ENSG00000169105.7.vs.ENSG00000140320.10	-0.0203451	0.00251417	0.442825
ENSG00000169249.11.vs.ENSG00000169239.11	-0.0521076	0.00769929	0.264039
ENSG00000169299.12.vs.ENSG00000239532.1	-0.00464852	-2.43506	0.539508
ENSG00000169299.12.vs.ENSG00000249863.2	-0.0104213	0.330855	0.0898012
ENSG00000169313.9.vs.ENSG00000181631.6	-0.108783	-0.219424	0.168412
ENSG00000169375.14.vs.ENSG00000169410.8	0.00830059	-0.0238521	0.419858
ENSG00000169413.2.vs.ENSG00000258810.1	-0.118905	4.30657	0.0843323
ENSG00000169548.3.vs.ENSG00000275004.2	0.839741	0.0169206	0.029179
ENSG00000169592.13.vs.ENSG00000149930.16	-0.0179868	0.011889	0.245738
ENSG00000169599.11.vs.ENSG00000198380.11	-0.0456444	0.00240677	0.0374207
ENSG00000169607.11.vs.ENSG00000115008.5	0.00439572	-0.00503103	0.424057
ENSG00000169714.15.vs.ENSG00000240682.8	0.00030651	-0.00157129	0.986477
ENSG00000169715.13.vs.ENSG00000205364.3	0.00290095	-0.0046625	0.272415
ENSG00000169718.16.vs.ENSG00000169733.10	0.00279548	-0.00647191	0.689319
ENSG00000169857.6.vs.ENSG00000259287.2	-0.0382035	0.584247	0.336737
ENSG00000169857.6.vs.ENSG00000259408.2	-0.0371807	0.3025	0.302711
ENSG00000169876.12.vs.ENSG00000205277.8	0.00572833	-0.352149	0.104964
ENSG00000169884.12.vs.ENSG00000134287.8	0.00738808	-0.000362785	0.992875
ENSG00000169884.12.vs.ENSG00000272822.1	0.00339085	1.15914	0.769759
ENSG00000169964.5.vs.ENSG00000163810.10	-0.0375968	0.232557	0.419923
ENSG00000169991.9.vs.ENSG00000159423.15	0.00301942	-0.00252947	0.552338
ENSG00000170049.8.vs.ENSG00000179859.7	-0.0144494	-0.0544514	0.692645
ENSG00000170085.16.vs.ENSG00000250909.1	-0.0093179	1.1792	0.482589
ENSG00000170085.16.vs.ENSG00000251414.1	-0.0106595	0.508805	0.589371
ENSG00000170113.14.vs.ENSG00000140157.13	0.0255507	-0.00184824	0.0438191
ENSG00000170128.3.vs.ENSG00000231333.2	-0.874815	1.13119	0.0614471
ENSG00000170165.5.vs.ENSG00000236816.2	-8.36211	4.24073	0.191854
ENSG00000170175.9.vs.ENSG00000181284.2	-0.017066	-0.00862013	0.603754
ENSG00000170236.13.vs.ENSG00000092439.12	4.98431	0.00791946	0.0287349
ENSG00000170236.13.vs.ENSG00000259298.1	5.28718	-0.0324218	0.0579724
ENSG00000170260.7.vs.ENSG00000204946.8	-0.0404514	0.0221826	0.413527
ENSG00000170315.12.vs.ENSG00000265095.1	-0.00128527	2.18995	0.146099
ENSG00000170345.8.vs.ENSG00000258820.4	-0.000747893	-1.1145	0.425709
ENSG00000170356.8.vs.ENSG00000243896.3	0.110791	0.41478	0.58526
ENSG00000170374.5.vs.ENSG00000094914.11	0.280582	-0.0195507	7.23574e-05
ENSG00000170456.13.vs.ENSG00000231788.4	0.00783814	1.01354	0.482618
ENSG00000170469.9.vs.ENSG00000170464.8	0.106719	-0.0203797	0.691478
ENSG00000170469.9.vs.ENSG00000170476.14	0.11971	-0.0323794	0.338865
ENSG00000170482.15.vs.ENSG00000170476.14	0.0651333	-0.0289225	0.0342373
ENSG00000170498.8.vs.ENSG00000174567.7	-0.00314385	-0.00116428	0.98374
ENSG00000170515.12.vs.ENSG00000135482.5	-0.00321149	-0.0106298	0.56857
ENSG00000170515.12.vs.ENSG00000139641.11	-0.00334976	0.0012465	0.47425
ENSG00000170515.12.vs.ENSG00000229117.7	-0.00139558	-0.00427096	0.175941
ENSG00000170523.3.vs.ENSG00000257829.1	-0.0220005	-0.0261259	0.822885
ENSG00000170540.13.vs.ENSG00000134419.14	-0.000253988	-0.000531704	0.780019
ENSG00000170604.4.vs.ENSG00000176182.5	-0.0170646	-0.0482901	0.137274
ENSG00000170653.17.vs.ENSG00000135390.16	0.0016822	-0.00370705	0.220656
ENSG00000170689.9.vs.ENSG00000120068.6	0.0128129	-0.0285363	0.115504
ENSG00000170689.9.vs.ENSG00000210741.1	0.00315286	0.406606	0.549113
ENSG00000170835.13.vs.ENSG00000148308.16	0.0113256	0.000956435	0.265918
ENSG00000170858.9.vs.ENSG00000104972.13	0.307216	-0.0728023	0.150696
ENSG00000170949.16.vs.ENSG00000170954.10	-0.00982607	0.0162083	0.805287
ENSG00000171109.17.vs.ENSG00000121864.8	0.0186889	-0.00819712	0.312412
ENSG00000171116.7.vs.ENSG00000123584.7	3.70942	-0.144451	0.551987
ENSG00000171135.12.vs.ENSG00000163701.17	-0.0210271	0.013649	0.24398
ENSG00000171219.8.vs.ENSG00000110047.16	-0.00488875	-0.0111053	0.0560685
ENSG00000171241.7.vs.ENSG00000259856.1	-0.000306335	0.725465	0.283401
ENSG00000171302.15.vs.ENSG00000265096.1	0.00485195	0.184607	0.361582
ENSG00000171345.12.vs.ENSG00000276252.1	-6.60004e-05	-1.03967	0.630907
ENSG00000171346.12.vs.ENSG00000171345.12	-0.000133108	-6.93638e-05	0.70788
ENSG00000171346.12.vs.ENSG00000171401.13	-0.000119214	-5.04743e-05	0.779054
ENSG00000171425.8.vs.ENSG00000063244.11	-0.035736	-0.00392648	0.069482
ENSG00000171431.3.vs.ENSG00000187242.4	-9.64238e-06	0.0930333	0.660495
ENSG00000171443.6.vs.ENSG00000261221.3	-0.00355006	-0.0563867	0.128049
ENSG00000171466.8.vs.ENSG00000239830.1	-0.00953034	-0.200198	0.33415
ENSG00000171475.12.vs.ENSG00000094804.8	0.0136557	-0.0107389	0.0284898
ENSG00000171540.7.vs.ENSG00000164253.11	-0.351721	0.0121681	0.748117
ENSG00000171574.16.vs.ENSG00000269855.2	0.00757025	-0.258515	0.887235
ENSG00000171603.15.vs.ENSG00000280113.1	-0.00099023	9.24718	0.134725
ENSG00000171606.16.vs.ENSG00000213013.4	0.00233379	0.632339	0.781427
ENSG00000171611.8.vs.ENSG00000137161.15	-1.70543	-0.00496739	0.150021
ENSG00000171631.13.vs.ENSG00000110237.3	0.00881558	0.00518368	0.611512
ENSG00000171723.14.vs.ENSG00000172717.14	0.0145722	-0.435738	0.754992
ENSG00000171747.7.vs.ENSG00000104823.7	0.00037877	-0.00659893	0.0897361
ENSG00000171793.12.vs.ENSG00000281207.1	-0.00117781	0.101752	0.541179
ENSG00000171903.15.vs.ENSG00000267218.2	-0.00604458	-2.07395	0.680882
ENSG00000171931.11.vs.ENSG00000108448.19	1.39836	-0.0317229	0.273596
ENSG00000171931.11.vs.ENSG00000171928.12	0.617378	-0.0245029	0.354747
ENSG00000172006.10.vs.ENSG00000172009.13	0.028815	-0.00426728	0.812099
ENSG00000172053.13.vs.ENSG00000172046.17	-0.00292806	0.0128516	0.329738
ENSG00000172061.8.vs.ENSG00000178772.6	0.0108054	-2.5625	0.187008
ENSG00000172062.15.vs.ENSG00000172058.14	-0.131132	-0.597448	0.276709
ENSG00000172113.7.vs.ENSG00000228638.1	0.0143352	-0.166836	0.462842
ENSG00000172113.7.vs.ENSG00000229453.2	0.00107885	-0.432163	0.594225
ENSG00000172183.13.vs.ENSG00000181026.14	0.00114998	-0.0257574	0.362299
ENSG00000172232.8.vs.ENSG00000196415.8	-2.19974	1.31288	0.66809
ENSG00000172301.9.vs.ENSG00000108651.8	0.00653804	-0.017457	0.521122
ENSG00000172350.8.vs.ENSG00000160703.14	-0.10027	0.0192473	0.211208
ENSG00000172375.11.vs.ENSG00000172273.11	-0.0483008	0.0258906	0.417057
ENSG00000172508.9.vs.ENSG00000175463.10	0.0352237	-0.0215423	0.452038
ENSG00000172586.7.vs.ENSG00000214655.9	-0.0164662	-0.00528498	0.333133
ENSG00000172613.6.vs.ENSG00000172830.11	-0.017353	-0.000220283	0.402879
ENSG00000172613.6.vs.ENSG00000175463.10	-0.0189875	-0.0224516	0.156673
ENSG00000172757.11.vs.ENSG00000172638.11	-0.00116547	0.00146486	0.0786719
ENSG00000172771.10.vs.ENSG00000207088.1	0.197006	0.123187	0.0055052
ENSG00000172785.17.vs.ENSG00000170122.5	-0.0511311	-0.167765	0.31662
ENSG00000172789.3.vs.ENSG00000197757.7	2.07203	-0.0419535	0.506561
ENSG00000172817.3.vs.ENSG00000254102.1	-0.0366638	-0.110165	0.900977
ENSG00000172932.13.vs.ENSG00000173020.9	0.00177339	-0.00762261	0.14577
ENSG00000172969.6.vs.ENSG00000236138.4	4.92119	-0.401295	0.00214194
ENSG00000172969.6.vs.ENSG00000241622.1	4.98728	1.57241	0.0016262
ENSG00000172977.11.vs.ENSG00000214659.4	-0.0540305	3.19604	0.0145441
ENSG00000173041.10.vs.ENSG00000213642.3	0.0211799	-2.04619	0.360288
ENSG00000173041.10.vs.ENSG00000235349.1	0.0221161	-0.551206	0.409155
ENSG00000173083.13.vs.ENSG00000173085.12	0.0309229	-0.0251735	0.46629
ENSG00000173120.13.vs.ENSG00000173020.9	0.00349905	-0.00853218	0.107043
ENSG00000173156.5.vs.ENSG00000173227.12	-0.00218778	0.00163119	0.868849
ENSG00000173230.14.vs.ENSG00000180353.9	0.00151397	-0.00235534	0.575349
ENSG00000173230.14.vs.ENSG00000243544.3	0.00127812	4.6919	0.0338595
ENSG00000173369.14.vs.ENSG00000159189.10	-0.00525163	0.00418299	0.222761
ENSG00000173432.9.vs.ENSG00000212789.4	-0.00105158	-2.488	0.309105
ENSG00000173451.5.vs.ENSG00000139291.12	-0.0351319	0.0037119	0.898496
ENSG00000173480.9.vs.ENSG00000196724.11	0.0839533	0.0353325	0.202791
ENSG00000173611.16.vs.ENSG00000119414.10	0.0555934	-0.00334155	0.275685
ENSG00000173674.9.vs.ENSG00000177189.11	0.000518584	0.0109149	0.0427248
ENSG00000173674.9.vs.ENSG00000184368.14	0.00271118	0.0403582	0.540443
ENSG00000173692.11.vs.ENSG00000204128.5	-0.000219594	0.00589966	0.296887
ENSG00000173726.9.vs.ENSG00000188739.13	-0.000349566	0.109194	0.865504
ENSG00000173825.6.vs.ENSG00000133884.8	-0.0737284	-0.0237708	0.164298
ENSG00000173825.6.vs.ENSG00000255478.1	-0.16428	2.73291	0.617371
ENSG00000173846.11.vs.ENSG00000222009.7	-0.041948	0.0373713	0.102449
ENSG00000173914.10.vs.ENSG00000173898.10	-0.0133903	-0.0010703	0.848884
ENSG00000173917.10.vs.ENSG00000120093.10	-0.00939469	-0.00198333	0.555822
ENSG00000173917.10.vs.ENSG00000120094.6	-0.0110417	-0.0884555	0.552869
ENSG00000173991.5.vs.ENSG00000141744.3	-0.121894	0.0366172	0.0194173
ENSG00000174109.4.vs.ENSG00000059145.17	-0.0544464	0.00817765	0.37476
ENSG00000174123.9.vs.ENSG00000174125.6	-0.0630512	0.000811009	0.66708
ENSG00000174197.15.vs.ENSG00000137802.12	0.0156303	0.01024	0.0311296
ENSG00000174236.3.vs.ENSG00000276261.1	0.739695	0.208	0.332158
ENSG00000174243.8.vs.ENSG00000172602.8	-0.00837615	-0.117415	0.0931453
ENSG00000174327.6.vs.ENSG00000161940.9	-0.0116325	0.00823447	0.889443
ENSG00000174407.10.vs.ENSG00000226094.1	1.81577	-5.03742	0.710901
ENSG00000174444.13.vs.ENSG00000261351.2	-0.000506869	-0.440558	0.0966743
ENSG00000174498.12.vs.ENSG00000103742.10	-0.0102036	-0.00674759	0.931099
ENSG00000174562.12.vs.ENSG00000167748.9	1.26437	0.0162491	9.3772e-06
ENSG00000174885.11.vs.ENSG00000142102.14	-0.240594	-0.00167332	0.641211
ENSG00000174885.11.vs.ENSG00000255026.1	-0.200336	-0.031318	0.594166
ENSG00000174944.7.vs.ENSG00000174946.6	-0.110908	-0.0743877	0.479192
ENSG00000174990.4.vs.ENSG00000260443.1	1.50156	-1.41349	0.395167
ENSG00000175061.16.vs.ENSG00000187688.13	-0.00141633	-0.0378364	0.124079
ENSG00000175066.14.vs.ENSG00000114126.16	0.012021	0.0203706	0.0120469
ENSG00000175084.10.vs.ENSG00000072195.13	-0.000210902	0.00658377	0.777341
ENSG00000175166.15.vs.ENSG00000114867.18	-0.000844671	0.0015474	0.426888
ENSG00000175189.3.vs.ENSG00000111087.8	1.71354	-0.0657046	0.616477
ENSG00000175189.3.vs.ENSG00000139269.2	1.86588	-0.0199722	0.791067
ENSG00000175262.13.vs.ENSG00000215785.2	-1.41209	-0.598607	0.482352
ENSG00000175265.16.vs.ENSG00000259904.1	-0.00302256	0.173055	0.445851
ENSG00000175309.13.vs.ENSG00000050767.14	-0.00648417	0.00710334	0.913005
ENSG00000175318.10.vs.ENSG00000067225.16	0.0223034	-0.000252671	0.142191
ENSG00000175414.6.vs.ENSG00000251414.1	0.0225459	0.427447	0.437083
ENSG00000175513.8.vs.ENSG00000175467.13	-0.272149	-0.0117798	0.118796
ENSG00000175567.7.vs.ENSG00000255847.4	-0.00151792	0.27954	0.343197
ENSG00000175592.7.vs.ENSG00000172500.11	-0.00389228	-0.0115076	0.230842
ENSG00000175602.3.vs.ENSG00000172543.6	-0.00764452	-0.0162288	0.351495
ENSG00000175634.13.vs.ENSG00000172508.9	-0.00681554	-0.0892449	0.585179
ENSG00000175643.8.vs.ENSG00000263179.1	-0.00623092	-5.45184	0.258882
ENSG00000175664.8.vs.ENSG00000102802.8	4.16304	-0.0331273	0.375017
ENSG00000175691.8.vs.ENSG00000253392.2	-0.0565227	0.215628	0.74644
ENSG00000175772.10.vs.ENSG00000230596.2	0.0394261	-0.902696	0.933102
ENSG00000175820.3.vs.ENSG00000151287.15	2.45881	0.0111528	0.0460062
ENSG00000175874.8.vs.ENSG00000196460.11	-0.0818505	0.31885	0.0417012
ENSG00000175879.8.vs.ENSG00000128709.11	-0.0240963	0.00776336	0.820529
ENSG00000175879.8.vs.ENSG00000128710.5	-0.0267223	0.0181164	0.504488
ENSG00000176040.12.vs.ENSG00000114529.11	0.5053	0.0105855	0.0834803
ENSG00000176092.12.vs.ENSG00000176083.16	0.00263347	0.00214615	0.83211
ENSG00000176095.10.vs.ENSG00000176020.8	0.0112468	-5.06825	0.221443
ENSG00000176148.14.vs.ENSG00000121690.8	0.0461449	-0.0198179	0.339141
ENSG00000176155.17.vs.ENSG00000169710.6	0.00584541	0.000329493	0.747477
ENSG00000176160.8.vs.ENSG00000108389.8	0.772448	0.0051739	0.0498131
ENSG00000176194.16.vs.ENSG00000280302.1	-0.252678	-5.0899	0.434757
ENSG00000176393.9.vs.ENSG00000238003.1	-0.00651561	-2.57783	0.273917
ENSG00000176454.12.vs.ENSG00000259904.1	-0.00419325	0.253161	0.254237
ENSG00000176531.9.vs.ENSG00000124466.8	-0.0106622	0.00150043	0.0281366
ENSG00000176700.18.vs.ENSG00000176371.12	0.0267122	-0.0381384	0.674217
ENSG00000176749.7.vs.ENSG00000266718.1	0.0368311	0.566051	1.15577e-26
ENSG00000176871.7.vs.ENSG00000277873.1	-0.00259561	-0.0979302	0.764126
ENSG00000176896.8.vs.ENSG00000123595.6	0.0126572	0.00535208	0.87972
ENSG00000176927.13.vs.ENSG00000126653.14	-0.238923	0.00281028	0.777457
ENSG00000176953.9.vs.ENSG00000169682.16	0.000363595	0.000440029	0.998065
ENSG00000176973.7.vs.ENSG00000173442.10	-0.0142051	-0.0061071	0.139967
ENSG00000177025.3.vs.ENSG00000166704.10	0.0331769	0.00257485	0.935494
ENSG00000177025.3.vs.ENSG00000243234.1	0.133086	-4.31701	0.643046
ENSG00000177030.15.vs.ENSG00000269915.1	-0.0054063	-0.462254	0.539527
ENSG00000177191.2.vs.ENSG00000105341.17	0.022536	-0.0196638	0.307748
ENSG00000177202.2.vs.ENSG00000088002.10	0.242626	0.000733426	0.467785
ENSG00000177234.7.vs.ENSG00000203805.9	-0.0598612	-0.000263177	0.977032
ENSG00000177363.4.vs.ENSG00000162191.12	0.0485991	-0.0110963	0.0651203
ENSG00000177427.11.vs.ENSG00000260647.1	-0.0214649	-0.539063	0.710107
ENSG00000177453.6.vs.ENSG00000261604.1	0.135993	-0.238865	0.568606
ENSG00000177465.4.vs.ENSG00000279026.1	0.0259381	0.271261	0.119299
ENSG00000177602.5.vs.ENSG00000262358.1	0.0395335	-6.46272	0.165861
ENSG00000177602.5.vs.ENSG00000262692.1	-0.0128621	-1.43658	0.154604
ENSG00000177646.16.vs.ENSG00000250796.1	0.01666	0.00365921	0.109601
ENSG00000177674.14.vs.ENSG00000215910.6	-0.00230177	-0.339864	0.861367
ENSG00000177692.10.vs.ENSG00000231355.1	0.0234521	3.95261	0.0169765
ENSG00000177733.6.vs.ENSG00000146021.13	-0.00212642	-0.011075	0.75382
ENSG00000177791.11.vs.ENSG00000166317.10	0.158737	0.0282895	0.180553
ENSG00000177830.16.vs.ENSG00000250397.2	-0.00835993	0.381501	0.122076
ENSG00000177839.6.vs.ENSG00000120322.3	0.0977731	0.0723196	0.00244759
ENSG00000177839.6.vs.ENSG00000197479.6	0.105247	0.0391189	0.0109097
ENSG00000177842.10.vs.ENSG00000172888.10	0.0378906	0.0144513	0.498673
ENSG00000177873.11.vs.ENSG00000188846.12	0.130631	-0.000952339	0.0547574
ENSG00000177888.7.vs.ENSG00000066279.15	0.0144214	0.0115376	0.000576476
ENSG00000177954.10.vs.ENSG00000231416.1	-0.00166788	1.4189	0.0283659
ENSG00000177984.6.vs.ENSG00000204001.8	0.000420494	1.29003	0.595881
ENSG00000178187.6.vs.ENSG00000254035.1	-0.188527	2.63535	0.069291
ENSG00000178217.12.vs.ENSG00000108219.13	0.0786214	-0.000324105	0.694982
ENSG00000178226.9.vs.ENSG00000052344.14	-0.0904468	0.00267015	0.250651
ENSG00000178386.11.vs.ENSG00000186026.6	0.0632928	0.000633163	0.847669
ENSG00000178401.13.vs.ENSG00000123352.16	0.0172966	0.0187952	0.175694
ENSG00000178460.16.vs.ENSG00000104205.11	0.278	-0.0290831	3.35815e-05
ENSG00000178691.9.vs.ENSG00000185158.11	0.00576863	-0.0473958	0.750948
ENSG00000178752.14.vs.ENSG00000168427.8	0.119541	-0.520296	0.17788
ENSG00000178773.13.vs.ENSG00000167526.12	-0.00764922	-0.000281254	0.532171
ENSG00000178789.7.vs.ENSG00000167850.3	-0.212943	-0.144992	0.278309
ENSG00000178796.11.vs.ENSG00000227045.1	-0.333945	1.842	0.605362
ENSG00000178826.9.vs.ENSG00000239419.3	0.00854376	0.475333	0.00908139
ENSG00000178999.11.vs.ENSG00000271002.1	-0.00497669	4.3322	0.441619
ENSG00000179071.4.vs.ENSG00000137501.15	0.240324	0.00281787	0.504879
ENSG00000179082.3.vs.ENSG00000268615.1	1.22424	-2.9286	0.053371
ENSG00000179091.4.vs.ENSG00000179632.8	0.00356811	-0.011626	0.0744775
ENSG00000179094.12.vs.ENSG00000220205.7	-0.000621241	-0.0124753	0.400832
ENSG00000179111.7.vs.ENSG00000179148.8	-1.76293	0.00575558	0.465321
ENSG00000179163.11.vs.ENSG00000117305.13	-0.00400126	0.00231401	0.587887
ENSG00000179163.11.vs.ENSG00000188822.7	-0.00350803	-0.0508673	0.474349
ENSG00000179218.12.vs.ENSG00000179262.8	-0.000315299	0.00167563	0.750255
ENSG00000179218.12.vs.ENSG00000266975.1	-0.000238095	1.68036	0.724654
ENSG00000179277.9.vs.ENSG00000233090.1	0.0305672	1.34123	0.60524
ENSG00000179299.15.vs.ENSG00000250906.1	0.00454826	4.0709	0.00822601
ENSG00000179406.6.vs.ENSG00000251451.1	-0.00687521	1.20089	0.0103906
ENSG00000179409.9.vs.ENSG00000167699.12	0.0125963	-0.024135	0.241617
ENSG00000179583.16.vs.ENSG00000280153.1	-0.0207783	0.0496173	0.159687
ENSG00000179598.5.vs.ENSG00000154803.11	0.0728141	0.0194575	0.103357
ENSG00000179761.10.vs.ENSG00000265845.2	0.0215037	0.202376	0.696931
ENSG00000179761.10.vs.ENSG00000265908.1	0.0224333	1.27827	0.0919905
ENSG00000179766.16.vs.ENSG00000198722.11	-0.367296	0.00223437	0.861674
ENSG00000179766.16.vs.ENSG00000198853.10	-0.255067	0.000490729	0.890192
ENSG00000179820.14.vs.ENSG00000126583.9	-0.00176247	-0.044863	0.718544
ENSG00000179832.16.vs.ENSG00000235173.5	0.0114134	-0.0250212	0.0272825
ENSG00000179832.16.vs.ENSG00000260428.2	0.00546136	-2.88965e-05	0.486704
ENSG00000179855.5.vs.ENSG00000064961.17	0.0458182	-0.0125068	0.0757378
ENSG00000179922.5.vs.ENSG00000276488.1	-0.06493	0.0549406	0.319835
ENSG00000179934.6.vs.ENSG00000228168.1	0.268786	-0.823517	0.0116244
ENSG00000179941.6.vs.ENSG00000091039.15	0.0303783	0.0106051	0.126676
ENSG00000179965.10.vs.ENSG00000180035.9	-0.0981455	0.00321997	0.619632
ENSG00000179979.8.vs.ENSG00000163945.14	0.064329	-0.0159368	0.190856
ENSG00000180098.8.vs.ENSG00000279443.1	-0.0252834	-0.185009	0.294304
ENSG00000180176.13.vs.ENSG00000254647.5	-0.000419801	-6.03653	0.406524
ENSG00000180190.10.vs.ENSG00000279852.1	-0.0133967	0.344282	0.00671988
ENSG00000180198.14.vs.ENSG00000204138.11	-0.0104063	0.0115268	0.539539
ENSG00000180198.14.vs.ENSG00000279443.1	-0.00732589	-0.122879	0.351776
ENSG00000180233.10.vs.ENSG00000235859.5	0.0130803	0.0304817	0.260298
ENSG00000180354.14.vs.ENSG00000225907.1	0.0053129	4.49911	0.0897647
ENSG00000180370.9.vs.ENSG00000163964.12	1.82405e-05	0.0179946	0.389343
ENSG00000180422.3.vs.ENSG00000129910.6	-3.6799	0.22041	0.363012
ENSG00000180422.3.vs.ENSG00000176715.14	-3.44714	-0.0020087	0.416146
ENSG00000180432.5.vs.ENSG00000235288.2	0.0518629	0.263757	0.0607592
ENSG00000180532.9.vs.ENSG00000204519.9	-0.0931207	0.0398885	0.273967
ENSG00000180532.9.vs.ENSG00000269026.2	-0.0801503	-3.58553	0.492789
ENSG00000180532.9.vs.ENSG00000269097.1	-0.176344	0.232868	0.540303
ENSG00000180535.3.vs.ENSG00000164715.5	-1.37348	0.0147731	0.0590707
ENSG00000180806.4.vs.ENSG00000037965.5	-0.0437792	0.101039	0.702574
ENSG00000180834.6.vs.ENSG00000233885.6	-0.126235	0.140236	0.20191
ENSG00000180879.12.vs.ENSG00000184343.9	-0.00225417	0.0710177	0.401715
ENSG00000180884.9.vs.ENSG00000280106.1	-0.00217213	0.0491153	0.873578
ENSG00000180902.15.vs.ENSG00000168395.13	0.00323607	-0.0159102	0.830253
ENSG00000180914.9.vs.ENSG00000070950.8	0.00426324	-0.0162421	0.642616
ENSG00000180999.9.vs.ENSG00000197959.12	0.779567	0.0711802	0.0749693
ENSG00000181007.8.vs.ENSG00000142065.12	0.0396308	0.015118	0.475588
ENSG00000181045.13.vs.ENSG00000173821.18	-0.0196295	-0.000605185	0.51422
ENSG00000181135.14.vs.ENSG00000181085.13	0.0153884	0.00240082	0.801482
ENSG00000181192.10.vs.ENSG00000065665.19	0.012383	-0.0379827	0.137853
ENSG00000181240.12.vs.ENSG00000125648.13	0.195976	-0.0077711	0.272715
ENSG00000181264.7.vs.ENSG00000196914.7	0.0606491	0.0042618	0.040833
ENSG00000181284.2.vs.ENSG00000184560.6	-0.0121454	-0.271702	0.842142
ENSG00000181378.12.vs.ENSG00000163499.10	0.159899	0.0952118	0.070548
ENSG00000181481.12.vs.ENSG00000266274.2	-0.00702491	0.556899	0.601428
ENSG00000181588.16.vs.ENSG00000071655.16	-0.0102626	-0.000889784	0.64892
ENSG00000181588.16.vs.ENSG00000239367.2	-0.0107454	2.88254	0.326618
ENSG00000181652.17.vs.ENSG00000243433.1	-0.0185318	0.707878	0.611291
ENSG00000181666.16.vs.ENSG00000189164.13	-0.0232324	0.190065	0.331156
ENSG00000181798.2.vs.ENSG00000171596.6	1.25093	-0.00288457	0.0969805
ENSG00000181826.8.vs.ENSG00000248936.1	0.120077	0.0164699	0.0106161
ENSG00000181885.17.vs.ENSG00000175826.10	-0.00247848	-0.0114936	0.0550569
ENSG00000181885.17.vs.ENSG00000202251.1	-0.00340824	1.6476	0.319469
ENSG00000181894.13.vs.ENSG00000121413.11	0.0497942	-0.00664221	0.204778
ENSG00000182004.11.vs.ENSG00000058673.14	-0.012735	0.0110369	0.0169459
ENSG00000182022.16.vs.ENSG00000232334.1	-0.0107869	12.0887	0.231826
ENSG00000182057.4.vs.ENSG00000233903.2	0.479604	-0.104092	0.702857
ENSG00000182057.4.vs.ENSG00000273366.1	0.383111	-0.116123	0.712185
ENSG00000182162.8.vs.ENSG00000169093.13	-0.0172325	-0.0220228	0.237659
ENSG00000182218.8.vs.ENSG00000036530.7	-0.0314929	0.666346	0.20334
ENSG00000182223.7.vs.ENSG00000145248.6	2.76713	-0.185522	0.295498
ENSG00000182224.10.vs.ENSG00000167874.6	-0.00336646	-0.157703	0.308794
ENSG00000182253.13.vs.ENSG00000261616.1	-0.00697394	0.844172	0.171137
ENSG00000182308.6.vs.ENSG00000014824.12	0.0811979	-0.00847124	0.698325
ENSG00000182318.5.vs.ENSG00000268895.4	-0.0737957	-0.273091	0.446183
ENSG00000182318.5.vs.ENSG00000269794.1	-0.0892676	2.7269	0.374591
ENSG00000182318.5.vs.ENSG00000279611.1	-0.0655254	-1.88595	0.539698
ENSG00000182327.7.vs.ENSG00000142484.6	0.281781	0.0682372	0.370655
ENSG00000182327.7.vs.ENSG00000142507.8	0.295272	-0.0106345	0.0346363
ENSG00000182359.13.vs.ENSG00000254433.1	-0.0353651	0.0584503	0.950412
ENSG00000182379.9.vs.ENSG00000123384.12	0.00844881	0.00149534	0.044559
ENSG00000182379.9.vs.ENSG00000182199.9	0.0231527	-0.0044236	0.143721
ENSG00000182511.10.vs.ENSG00000196547.13	-0.00316056	-0.00346965	0.899793
ENSG00000182531.7.vs.ENSG00000228547.5	4.72111	-1.3454	0.000173243
ENSG00000182531.7.vs.ENSG00000237470.3	3.391	-9.73467	1.94288e-05
ENSG00000182747.4.vs.ENSG00000112357.11	0.337046	-0.0508903	0.193318
ENSG00000182809.9.vs.ENSG00000185347.16	-0.00261843	-0.012999	0.244628
ENSG00000182809.9.vs.ENSG00000213145.8	-0.00180558	-0.0885129	0.13026
ENSG00000182809.9.vs.ENSG00000257341.4	-0.00348527	4.29524	0.0414324
ENSG00000182810.6.vs.ENSG00000263201.1	-0.00559451	1.43363	0.000411627
ENSG00000182866.15.vs.ENSG00000183615.5	-0.0221677	-0.0184005	0.365467
[truncated: 2,363 more rows]

## Sheet: BG.DFI.BRCA
Gene	Coefficient1	Coefficient2	Logrank p-value
ENSG00000000460.15.vs.ENSG00000239494.2	0.00739436	-1.61264	0.275168
ENSG00000000938.11.vs.ENSG00000126705.12	-0.0264156	0.0106887	0.0407624
ENSG00000003096.12.vs.ENSG00000279587.1	-0.0108957	1.2497	0.664688
ENSG00000003393.13.vs.ENSG00000082126.16	-0.000223522	0.203054	0.952694
ENSG00000003400.13.vs.ENSG00000064012.20	-0.0158789	0.00874684	0.510464
ENSG00000003402.18.vs.ENSG00000003400.13	0.000655938	-0.012877	0.694114
ENSG00000003989.15.vs.ENSG00000104213.11	7.27804e-05	0.00192127	0.873374
ENSG00000004838.12.vs.ENSG00000126062.3	-0.0386281	0.0132115	0.00247716
ENSG00000004975.10.vs.ENSG00000132535.17	-0.000902764	0.00656364	0.871365
ENSG00000004975.10.vs.ENSG00000175826.10	-0.0065515	0.00556925	0.504668
ENSG00000005059.14.vs.ENSG00000249965.2	-0.0068374	1.82303	0.26907
ENSG00000005059.14.vs.ENSG00000273447.1	0.00574292	-0.722842	0.211443
ENSG00000005075.14.vs.ENSG00000170667.13	0.0013233	-0.00912534	0.963007
ENSG00000005189.18.vs.ENSG00000005187.10	-0.018661	-0.0298508	0.510702
ENSG00000005249.11.vs.ENSG00000105856.12	-0.00294479	-0.000334254	0.517441
ENSG00000005379.14.vs.ENSG00000265206.3	-0.00303926	-0.0877002	0.420542
ENSG00000005961.16.vs.ENSG00000161682.13	-0.011423	0.022174	0.392933
ENSG00000005961.16.vs.ENSG00000186566.10	0.0330632	-0.00482638	0.630037
ENSG00000006282.18.vs.ENSG00000006283.16	-0.0016194	0.0472026	0.102816
ENSG00000006283.16.vs.ENSG00000108846.14	0.04485	0.000592112	0.124939
ENSG00000006607.12.vs.ENSG00000168385.16	-0.0132565	0.00137396	0.350192
ENSG00000007038.9.vs.ENSG00000162078.10	0.00287307	-0.00118673	0.633558
ENSG00000007047.13.vs.ENSG00000104859.13	0.00574581	-0.00781167	0.254704
ENSG00000007216.13.vs.ENSG00000109101.6	-0.0116334	-0.0201194	0.614897
ENSG00000007216.13.vs.ENSG00000263266.2	-0.0117994	0.0137871	0.438666
ENSG00000007237.17.vs.ENSG00000109047.7	-0.00852604	1.15214	0.118339
ENSG00000007264.12.vs.ENSG00000105278.9	0.0166177	-0.00714925	0.195212
ENSG00000007312.11.vs.ENSG00000007314.10	-0.0113275	-0.00783111	0.5776
ENSG00000007341.17.vs.ENSG00000273483.1	-0.0021401	0.625382	0.428012
ENSG00000008056.11.vs.ENSG00000126759.11	0.00166642	-0.0783474	0.474921
ENSG00000008516.15.vs.ENSG00000205890.3	-0.0182229	0.0169283	0.506946
ENSG00000008517.15.vs.ENSG00000008516.15	-0.000329114	-0.0162234	0.513471
ENSG00000009724.15.vs.ENSG00000116649.8	-0.293768	0.00285113	0.0422533
ENSG00000010327.9.vs.ENSG00000010322.14	0.00281258	-0.00338278	0.0149078
ENSG00000010379.14.vs.ENSG00000111181.11	-0.0474811	0.0109134	0.620161
ENSG00000010610.8.vs.ENSG00000110811.18	-0.00279375	0.00518341	0.0107029
ENSG00000010626.13.vs.ENSG00000111669.13	-0.037477	0.000510294	0.0679363
ENSG00000010704.17.vs.ENSG00000197061.4	-0.0140264	0.00981959	0.275852
ENSG00000011143.15.vs.ENSG00000278627.1	-0.0262585	0.350387	0.177942
ENSG00000011451.16.vs.ENSG00000105122.11	0.000624738	-0.0186584	0.36316
ENSG00000011523.12.vs.ENSG00000232613.5	-0.0163771	-0.367903	0.134009
ENSG00000012061.14.vs.ENSG00000125744.10	-0.00172398	0.00569663	0.641358
ENSG00000012211.11.vs.ENSG00000279422.1	0.00925407	1.47331	0.511457
ENSG00000013306.14.vs.ENSG00000267750.4	0.00229627	0.0298565	0.063972
ENSG00000013561.16.vs.ENSG00000271871.1	0.000462853	0.067348	0.984989
ENSG00000013588.5.vs.ENSG00000247498.8	-6.00395e-05	0.0033819	0.979113
ENSG00000015285.9.vs.ENSG00000101945.15	-0.0120135	0.00584546	0.575242
ENSG00000015676.16.vs.ENSG00000279853.1	0.000786909	0.539688	0.703416
ENSG00000016864.15.vs.ENSG00000114904.11	0.00190327	-0.0290527	0.0273501
ENSG00000018408.13.vs.ENSG00000114744.7	-0.000814321	0.00665846	0.63584
ENSG00000018625.13.vs.ENSG00000132681.15	-0.00995041	-0.0240022	0.363698
ENSG00000019102.10.vs.ENSG00000255045.1	-0.00453425	-1.11477	0.715741
ENSG00000019995.6.vs.ENSG00000273599.1	-0.00324608	-0.020591	0.819672
ENSG00000021762.18.vs.ENSG00000236710.1	0.0014942	0.494815	0.845687
ENSG00000021776.9.vs.ENSG00000259751.1	-0.0006869	0.622005	0.858691
ENSG00000022277.11.vs.ENSG00000087589.15	-0.00222498	-0.0317433	0.64695
ENSG00000022277.11.vs.ENSG00000280387.1	-0.00213342	-1.49559	0.391506
ENSG00000022556.14.vs.ENSG00000267265.4	0.00183108	-0.0948322	0.319621
ENSG00000023572.7.vs.ENSG00000272579.1	0.0385538	-0.00534341	0.0336679
ENSG00000023608.4.vs.ENSG00000279633.1	0.0341432	0.848477	0.155975
ENSG00000024422.10.vs.ENSG00000105373.17	-0.00093615	-0.000517878	0.611122
ENSG00000027847.12.vs.ENSG00000184840.10	0.0158382	0.000284758	0.0103035
ENSG00000029993.13.vs.ENSG00000230508.1	0.000375643	-0.063158	0.930991
ENSG00000033867.15.vs.ENSG00000163491.15	0.00225735	-0.038888	0.000996774
ENSG00000034510.5.vs.ENSG00000213399.3	0.000187684	-0.172085	0.216402
ENSG00000035862.11.vs.ENSG00000267355.2	0.000158443	-0.0431758	0.872293
ENSG00000037280.14.vs.ENSG00000161055.3	0.0114257	-0.0246855	0.35566
ENSG00000038532.13.vs.ENSG00000280153.1	-0.0101435	-0.135977	0.0233978
ENSG00000039068.17.vs.ENSG00000103047.6	6.25433e-05	0.00400737	0.926432
ENSG00000040633.11.vs.ENSG00000175826.10	-0.00932242	0.00712708	0.371068
ENSG00000041357.14.vs.ENSG00000279373.1	0.00229707	-1.60303	0.244567
ENSG00000042062.10.vs.ENSG00000232043.1	-0.00381113	-0.0808871	0.727583
ENSG00000044090.7.vs.ENSG00000240625.3	0.00298393	-5.69623	0.0796099
ENSG00000044090.7.vs.ENSG00000272223.1	0.00236384	-0.778822	0.0767343
ENSG00000044446.10.vs.ENSG00000173698.16	-0.00365585	-0.00159518	0.888899
ENSG00000048544.5.vs.ENSG00000124496.11	0.00293379	-0.0059253	0.256922
ENSG00000049245.11.vs.ENSG00000049246.13	-0.00440394	-0.00974872	0.124282
ENSG00000050405.12.vs.ENSG00000139624.11	-0.00230567	-0.0135078	0.0581117
ENSG00000050555.16.vs.ENSG00000126878.11	0.0132918	0.00174886	4.54798e-11
ENSG00000051382.7.vs.ENSG00000174715.7	-2.31751e-05	1.5711	0.36384
ENSG00000053438.8.vs.ENSG00000235044.1	0.0130733	0.534817	0.733295
ENSG00000053501.11.vs.ENSG00000099330.7	0.0110557	0.00119276	0.356678
ENSG00000054118.12.vs.ENSG00000214193.8	-0.00128326	-0.0145142	0.27857
ENSG00000054179.10.vs.ENSG00000186193.8	-0.00159912	0.00868567	0.000453945
ENSG00000054967.11.vs.ENSG00000110237.3	0.00636508	-0.00215431	0.80955
ENSG00000054967.11.vs.ENSG00000256448.4	0.00292338	-0.140726	0.988529
ENSG00000055211.11.vs.ENSG00000202343.1	-0.00143802	-1.04355	0.300149
ENSG00000055211.11.vs.ENSG00000220848.4	-0.00838739	0.0994245	0.426099
ENSG00000055483.18.vs.ENSG00000267355.2	-0.00576007	-0.00716516	0.474361
ENSG00000055917.14.vs.ENSG00000235411.1	0.00224597	1.4519	0.276258
ENSG00000055957.9.vs.ENSG00000162267.11	-2.18262	0.133457	0.135797
ENSG00000056558.9.vs.ENSG00000119403.12	-0.0162506	0.00816504	0.123521
ENSG00000057468.6.vs.ENSG00000137955.14	-0.0101767	-0.00166551	0.924973
ENSG00000057593.12.vs.ENSG00000126217.19	-0.0151104	0.000950731	0.562709
ENSG00000057593.12.vs.ENSG00000126218.10	-0.0148875	0.0196316	0.527628
ENSG00000058453.15.vs.ENSG00000226526.1	0.00193554	3.11973	0.000125435
ENSG00000058600.14.vs.ENSG00000103319.10	-0.006141	0.00301435	0.594778
ENSG00000059145.17.vs.ENSG00000260425.1	0.0415537	-2.2403	0.00163933
ENSG00000059573.7.vs.ENSG00000119977.19	0.000719914	-0.00805821	0.400894
ENSG00000060558.3.vs.ENSG00000125910.5	0.00604491	-0.0427037	0.419626
ENSG00000061273.16.vs.ENSG00000111424.9	-0.00311439	0.00334962	0.550469
ENSG00000062524.14.vs.ENSG00000103932.10	-0.131926	0.0167286	0.0831116
ENSG00000063015.18.vs.ENSG00000109118.12	0.00117123	-0.00854165	0.179388
ENSG00000064313.10.vs.ENSG00000279347.1	0.0015952	0.167362	0.709726
ENSG00000064547.12.vs.ENSG00000105717.12	0.00391207	-0.073768	0.768702
ENSG00000064601.15.vs.ENSG00000168612.4	0.00237663	-0.00913167	0.248558
ENSG00000064687.11.vs.ENSG00000064666.13	0.00759557	0.0021923	0.128257
ENSG00000064999.13.vs.ENSG00000065060.15	0.00240604	-0.00222748	0.815797
ENSG00000065029.13.vs.ENSG00000023892.10	-0.00242651	-0.00958496	0.509016
ENSG00000065029.13.vs.ENSG00000146197.8	-0.00590321	0.0018772	0.33544
ENSG00000065371.16.vs.ENSG00000175455.13	-0.00427624	0.00483092	0.530898
ENSG00000065717.13.vs.ENSG00000104964.13	-0.00700448	0.000455492	0.464781
ENSG00000065978.16.vs.ENSG00000171960.9	0.000527982	-0.00502644	0.283762
ENSG00000066117.13.vs.ENSG00000110881.10	-0.00385486	0.0319558	0.00537334
ENSG00000066117.13.vs.ENSG00000167588.11	-0.000508806	0.000934897	0.909998
ENSG00000066336.10.vs.ENSG00000134571.9	0.00416416	-0.846766	0.900776
ENSG00000066336.10.vs.ENSG00000255197.4	0.00785224	-0.232809	0.17758
ENSG00000067334.12.vs.ENSG00000023909.8	-0.0018627	0.0130508	0.0987196
ENSG00000067840.11.vs.ENSG00000067829.17	0.0079924	0.00867081	0.0474239
ENSG00000068001.12.vs.ENSG00000114378.15	0.00445131	0.0286771	0.0010676
ENSG00000068137.13.vs.ENSG00000184451.5	0.00016309	0.187105	0.0733066
ENSG00000068308.12.vs.ENSG00000102096.9	-0.00381979	-0.00554323	0.332069
ENSG00000068724.14.vs.ENSG00000228925.1	0.00399782	0.274039	0.275741
ENSG00000069956.10.vs.ENSG00000138594.11	0.00946141	-0.00397421	0.0142344
ENSG00000070444.13.vs.ENSG00000127804.11	0.0042218	-0.00620021	0.815173
ENSG00000070444.13.vs.ENSG00000263345.1	0.0110871	-0.280722	0.218693
ENSG00000070476.13.vs.ENSG00000159650.7	-0.00490198	0.434155	0.562021
ENSG00000070476.13.vs.ENSG00000279328.1	-0.00806746	0.986564	0.232442
ENSG00000070785.15.vs.ENSG00000226499.1	0.0114595	0.530028	0.199433
ENSG00000070785.15.vs.ENSG00000232369.1	0.00985257	1.76862	0.00401324
ENSG00000070785.15.vs.ENSG00000268949.1	0.00549656	0.95885	0.00413412
ENSG00000071655.16.vs.ENSG00000239367.2	0.00787987	-2.25878	0.00199821
ENSG00000071859.13.vs.ENSG00000130827.6	0.00321135	0.000874296	0.334174
ENSG00000072062.12.vs.ENSG00000188032.8	0.00312456	0.94713	3.44105e-05
ENSG00000072832.13.vs.ENSG00000181215.11	0.00105774	0.38767	0.126726
ENSG00000072858.9.vs.ENSG00000241529.3	-0.00256195	-0.0649437	0.695958
ENSG00000073008.13.vs.ENSG00000216588.7	0.010637	0.0448082	0.00998249
ENSG00000073150.12.vs.ENSG00000073146.14	0.0124687	-0.0362615	0.368608
ENSG00000073150.12.vs.ENSG00000170638.8	0.0026019	0.00595476	0.116403
ENSG00000073670.12.vs.ENSG00000161692.16	0.0581373	-0.00878664	0.784637
ENSG00000074266.16.vs.ENSG00000254783.1	0.00532637	0.215636	0.613159
ENSG00000074319.11.vs.ENSG00000151116.15	-0.000515155	-0.00619128	0.544724
ENSG00000074660.14.vs.ENSG00000167703.13	0.0156396	-0.00536444	0.388633
ENSG00000076043.8.vs.ENSG00000256533.1	0.0107187	-1.20737	0.110302
ENSG00000076067.10.vs.ENSG00000257576.1	-0.00313913	0.43235	0.56734
ENSG00000076248.9.vs.ENSG00000076555.14	0.00570062	-0.000422466	0.157274
ENSG00000076248.9.vs.ENSG00000135093.11	0.00610429	-0.00605732	0.132414
ENSG00000076258.8.vs.ENSG00000225704.2	0.0352485	-0.393493	0.244424
ENSG00000076321.9.vs.ENSG00000200674.1	-0.00239483	2.46876	0.146569
ENSG00000076650.5.vs.ENSG00000166359.9	-0.00254041	0.231215	0.226994
ENSG00000076864.18.vs.ENSG00000090686.14	0.00513546	-0.00676286	0.17728
ENSG00000077147.13.vs.ENSG00000095587.8	-0.000186722	0.00649933	0.977328
ENSG00000077147.13.vs.ENSG00000155629.13	-0.000153667	-0.00344151	0.828606
ENSG00000077454.14.vs.ENSG00000224729.5	-0.0271912	0.188426	0.269943
ENSG00000077713.17.vs.ENSG00000252147.1	0.011313	0.0114624	0.381907
ENSG00000077782.18.vs.ENSG00000254981.1	3.40223e-06	-0.69008	0.43913
ENSG00000077782.18.vs.ENSG00000272159.1	-0.000779722	0.23585	0.612343
ENSG00000078081.6.vs.ENSG00000078070.10	-0.00385168	-9.10141e-05	0.712236
ENSG00000078747.11.vs.ENSG00000125971.15	-0.0010826	-0.000189924	0.957964
ENSG00000079246.14.vs.ENSG00000279348.1	5.03505e-05	0.00110244	0.998176
ENSG00000079337.14.vs.ENSG00000280054.1	-0.0154214	0.235086	0.356849
ENSG00000079432.6.vs.ENSG00000188368.8	0.00211145	0.0829494	0.137899
ENSG00000079459.11.vs.ENSG00000227203.3	-0.00126481	-0.476014	0.644332
ENSG00000079616.11.vs.ENSG00000174992.7	0.00248821	-0.0281839	0.564598
ENSG00000079805.15.vs.ENSG00000267544.1	0.00245075	1.32609	0.0158015
ENSG00000079999.12.vs.ENSG00000180739.13	0.00302932	0.0135761	0.149498
ENSG00000080644.14.vs.ENSG00000117971.10	-0.0340027	-0.00535114	0.909643
ENSG00000080644.14.vs.ENSG00000261762.1	-0.0588203	0.103539	0.506212
ENSG00000080854.13.vs.ENSG00000280237.1	0.0943951	-0.0314497	0.00140323
ENSG00000081051.6.vs.ENSG00000163631.15	-0.0297183	0.000848542	0.187695
ENSG00000081154.10.vs.ENSG00000174173.6	-0.00358354	0.00956744	0.50208
ENSG00000081181.6.vs.ENSG00000259502.1	0.0345079	-0.426682	0.417239
ENSG00000081692.11.vs.ENSG00000230005.2	0.00917229	0.0683757	0.169611
ENSG00000081818.3.vs.ENSG00000113209.8	0.0131298	0.00460817	0.710345
ENSG00000082126.16.vs.ENSG00000155755.17	0.198138	0.0024676	0.910221
ENSG00000082781.10.vs.ENSG00000173702.6	0.00039249	-0.02355	0.598041
ENSG00000083099.9.vs.ENSG00000112159.10	-0.00187639	0.00138958	0.912663
ENSG00000083223.16.vs.ENSG00000135070.12	0.00173347	0.0127278	0.280308
ENSG00000083444.15.vs.ENSG00000116688.15	0.00143814	-0.00579266	0.000604318
ENSG00000083807.8.vs.ENSG00000119574.11	0.00571026	0.0109615	0.45572
ENSG00000083812.10.vs.ENSG00000249471.6	-0.00939963	0.00892193	0.962843
ENSG00000083844.9.vs.ENSG00000105146.11	0.00164462	-0.386599	0.675101
ENSG00000083845.7.vs.ENSG00000171574.16	0.000277502	-0.0411234	0.516797
ENSG00000083845.7.vs.ENSG00000269855.2	8.85712e-05	0.0479717	0.946136
ENSG00000084652.14.vs.ENSG00000025800.12	0.00316314	-0.000191647	0.474256
ENSG00000084652.14.vs.ENSG00000160050.13	0.00246245	0.0184196	0.188752
ENSG00000084693.14.vs.ENSG00000138080.12	0.00657202	0.001574	2.47175e-05
ENSG00000085063.13.vs.ENSG00000255202.1	-0.000275723	0.276448	0.687225
ENSG00000085644.12.vs.ENSG00000228146.5	0.00449745	-0.0195028	0.729388
ENSG00000085831.14.vs.ENSG00000085832.15	-0.00305414	0.00324813	0.0329946
ENSG00000086015.19.vs.ENSG00000236111.5	0.00521876	3.43884	0.00789685
ENSG00000086159.11.vs.ENSG00000167580.6	-0.0130124	0.0213127	0.976812
ENSG00000086506.2.vs.ENSG00000188536.11	0.22571	0.0247646	0.150402
ENSG00000086730.15.vs.ENSG00000207741.1	-0.022795	-0.183717	0.339993
ENSG00000086848.13.vs.ENSG00000255561.5	0.0702145	-0.0914527	0.122682
ENSG00000086967.9.vs.ENSG00000269404.5	-0.371585	-0.00201708	0.505071
ENSG00000087077.10.vs.ENSG00000087087.17	0.00228284	-0.00322579	0.604066
ENSG00000087088.18.vs.ENSG00000087086.12	0.00631301	9.03335e-05	0.0722014
ENSG00000087088.18.vs.ENSG00000104808.6	0.00692527	0.0512371	0.0827784
ENSG00000087111.19.vs.ENSG00000109107.12	-0.00300189	0.00366789	0.461822
ENSG00000087245.11.vs.ENSG00000087253.10	0.000133682	-0.00395618	0.806544
ENSG00000087266.14.vs.ENSG00000087274.15	0.00863585	0.000244654	0.0077219
ENSG00000087338.4.vs.ENSG00000196975.13	0.00528172	0.00452753	0.114242
ENSG00000087502.16.vs.ENSG00000273680.1	0.00215788	-0.091291	0.862837
ENSG00000087502.16.vs.ENSG00000274315.1	0.00237648	-0.324135	0.747582
ENSG00000088247.14.vs.ENSG00000181240.12	0.00197573	-1.62725	0.0239119
ENSG00000088280.17.vs.ENSG00000204219.8	0.0125241	-0.00380419	0.00771432
ENSG00000088367.19.vs.ENSG00000131043.10	-0.00791578	0.00144406	0.0337591
ENSG00000088827.11.vs.ENSG00000149451.16	0.000901207	0.00572191	0.929634
ENSG00000088899.13.vs.ENSG00000215251.3	0.00814905	0.00564547	0.049253
ENSG00000089012.13.vs.ENSG00000101307.14	-0.0636932	0.0377653	0.276094
ENSG00000089101.16.vs.ENSG00000173404.4	0.0183363	0.000117928	0.706651
ENSG00000089101.16.vs.ENSG00000280229.1	0.014319	0.198354	0.0976911
ENSG00000089127.11.vs.ENSG00000111331.11	-0.00298434	0.000137874	0.275697
ENSG00000089169.13.vs.ENSG00000089127.11	-0.0104402	-0.00274811	0.270533
ENSG00000089280.17.vs.ENSG00000260060.1	-0.000751295	0.0851377	0.772277
ENSG00000089280.17.vs.ENSG00000261359.2	-0.00024871	-1.51905	0.2822
ENSG00000089639.9.vs.ENSG00000105726.15	-0.00539116	0.00237149	0.674301
ENSG00000089692.7.vs.ENSG00000010610.8	-0.0125548	-0.00176689	0.363193
ENSG00000089692.7.vs.ENSG00000159335.14	-0.02377	0.000681094	0.110969
ENSG00000089775.10.vs.ENSG00000259116.1	0.0181252	-0.0505306	0.624523
ENSG00000089775.10.vs.ENSG00000272909.1	0.036924	-0.577377	0.107645
ENSG00000090006.16.vs.ENSG00000160410.13	-0.00122221	0.00489806	0.486621
ENSG00000090097.19.vs.ENSG00000280422.1	0.00522658	-0.288917	0.466368
ENSG00000090316.14.vs.ENSG00000163945.14	0.0105391	-0.00106516	0.0785641
ENSG00000090470.13.vs.ENSG00000246922.7	-0.0325305	-0.0923701	0.10355
ENSG00000090554.11.vs.ENSG00000142541.15	-0.119235	6.50672e-06	0.471315
ENSG00000090615.11.vs.ENSG00000176915.13	0.00753477	-0.00799456	0.0466293
ENSG00000090659.16.vs.ENSG00000182566.11	-0.0197241	0.229995	0.0190245
ENSG00000090674.14.vs.ENSG00000198816.5	0.0131037	-0.00130504	0.0220066
ENSG00000090924.13.vs.ENSG00000128016.5	0.012958	-0.000770345	0.00121536
ENSG00000090932.9.vs.ENSG00000105197.9	0.0254752	0.00527034	0.000258859
ENSG00000090932.9.vs.ENSG00000186838.12	0.039655	0.232654	0.000272939
ENSG00000090975.11.vs.ENSG00000051825.13	0.016231	0.00750855	0.0279538
ENSG00000090975.11.vs.ENSG00000150967.16	0.0165982	0.010837	0.0228358
ENSG00000090975.11.vs.ENSG00000280120.1	0.0169093	0.050669	0.028588
ENSG00000091073.18.vs.ENSG00000243566.5	0.00445139	0.0203204	0.312798
ENSG00000091542.8.vs.ENSG00000091536.15	-0.00183881	-0.0102649	0.813378
ENSG00000091947.8.vs.ENSG00000221044.2	0.000635474	-1.55897	0.719593
ENSG00000092010.13.vs.ENSG00000259371.2	-0.0030004	-4.97557	0.00959029
ENSG00000092054.12.vs.ENSG00000197616.10	-0.0320254	-1.53797	0.332241
ENSG00000092068.17.vs.ENSG00000092067.5	-0.000468843	0.831455	0.635872
ENSG00000092096.13.vs.ENSG00000100842.11	0.000613136	0.00248802	0.360982
ENSG00000092140.13.vs.ENSG00000092108.19	0.00620968	-0.00320309	0.867721
ENSG00000092208.15.vs.ENSG00000258591.2	-0.00498236	1.03269	0.701353
ENSG00000092295.10.vs.ENSG00000092330.14	0.00394202	-0.0145102	0.0989411
ENSG00000092295.10.vs.ENSG00000100949.13	0.00603379	0.00706043	0.715054
ENSG00000092929.10.vs.ENSG00000266980.1	0.0016576	0.0482706	0.678693
ENSG00000093134.12.vs.ENSG00000112299.7	0.0816168	-0.0419995	0.30684
ENSG00000093134.12.vs.ENSG00000112303.12	0.0703265	-0.0124552	0.279372
ENSG00000094631.17.vs.ENSG00000102145.12	-0.00292216	-1.39619	0.277073
ENSG00000095059.14.vs.ENSG00000105583.8	0.00579363	0.00216034	0.0236584
ENSG00000095261.12.vs.ENSG00000270917.1	0.00661197	0.499236	0.0346046
ENSG00000095370.18.vs.ENSG00000160404.16	0.00315884	0.00731168	0.629922
ENSG00000095485.15.vs.ENSG00000196072.10	-0.0167175	0.00332353	0.584095
ENSG00000095585.15.vs.ENSG00000229417.1	-0.0398594	0.212982	0.0826237
ENSG00000095752.5.vs.ENSG00000269275.1	0.050988	0.982999	0.163279
ENSG00000095970.15.vs.ENSG00000161911.10	0.00626499	-0.625636	0.302925
ENSG00000096717.10.vs.ENSG00000219932.6	-0.00665856	0.853645	0.336451
ENSG00000097007.16.vs.ENSG00000130713.14	0.00141697	0.0152197	0.247564
ENSG00000097096.8.vs.ENSG00000280099.1	-0.0100339	0.00563907	0.678084
ENSG00000099260.9.vs.ENSG00000223656.1	0.00756485	-2.86012	0.243937
ENSG00000099308.9.vs.ENSG00000268173.1	-0.0193285	-0.484921	0.501135
ENSG00000099337.4.vs.ENSG00000099338.21	-0.00119824	0.0232826	0.286034
ENSG00000099338.21.vs.ENSG00000099341.10	0.0118254	0.00178743	0.0494533
ENSG00000099617.3.vs.ENSG00000228300.12	0.479198	0.00503044	0.0204
ENSG00000099804.7.vs.ENSG00000197540.6	0.00955348	-0.0837384	0.00856352
ENSG00000099812.7.vs.ENSG00000099864.16	0.00238106	-0.000655972	0.647304
ENSG00000099904.14.vs.ENSG00000099901.15	0.0108846	0.00186847	0.0955763
ENSG00000099954.17.vs.ENSG00000182902.12	-0.0192103	-0.0376474	0.209449
ENSG00000099974.7.vs.ENSG00000228039.3	-0.0790114	2.62818	0.000577684
ENSG00000099985.3.vs.ENSG00000279699.1	-0.0058138	-3.15382	0.0721294
ENSG00000099992.14.vs.ENSG00000239282.6	-0.0105859	0.0297359	0.802951
ENSG00000099994.10.vs.ENSG00000099991.15	0.000251047	0.00173674	0.786844
ENSG00000100034.12.vs.ENSG00000100038.18	0.0134079	-0.0856824	0.12483
ENSG00000100065.13.vs.ENSG00000100060.16	-0.000781634	-0.0135392	0.66856
ENSG00000100068.10.vs.ENSG00000231466.2	-0.0505355	-0.0883979	0.411147
ENSG00000100092.19.vs.ENSG00000100083.17	-0.00229857	0.00752808	0.343349
ENSG00000100097.10.vs.ENSG00000100092.19	0.000767309	-0.00621848	0.000293959
ENSG00000100097.10.vs.ENSG00000273899.3	0.000605633	0.0234199	0.000542042
ENSG00000100139.12.vs.ENSG00000280527.1	0.0040815	-0.0716375	0.308034
ENSG00000100142.13.vs.ENSG00000100139.12	-0.0545507	0.00436765	0.188444
ENSG00000100142.13.vs.ENSG00000278948.1	-0.0550875	0.0761511	0.364346
ENSG00000100142.13.vs.ENSG00000280527.1	-0.0511819	0.267564	0.471305
ENSG00000100147.12.vs.ENSG00000198911.10	0.132022	-0.00213548	0.0109785
ENSG00000100170.8.vs.ENSG00000232346.1	0.00114604	0.21034	0.296675
ENSG00000100197.19.vs.ENSG00000205702.9	-0.0616112	-0.183174	0.634551
ENSG00000100220.10.vs.ENSG00000205853.9	0.00167128	0.123544	0.771568
ENSG00000100226.14.vs.ENSG00000272669.1	0.000280905	-0.125452	0.776018
ENSG00000100226.14.vs.ENSG00000273076.1	0.000846575	-1.66286	0.424766
ENSG00000100280.15.vs.ENSG00000100276.9	0.000612704	0.036028	0.845051
ENSG00000100297.14.vs.ENSG00000100292.15	0.0024449	0.00370569	0.0910304
ENSG00000100335.11.vs.ENSG00000128268.11	0.00163604	0.00483482	0.413934
ENSG00000100350.13.vs.ENSG00000100348.8	-0.00103561	0.00546758	0.271188
ENSG00000100350.13.vs.ENSG00000100353.16	-0.000497308	0.00157659	0.491627
ENSG00000100359.19.vs.ENSG00000272834.1	0.00168217	-1.08755	0.703631
ENSG00000100385.12.vs.ENSG00000133466.12	-0.0100825	0.0043872	0.0651529
ENSG00000100401.18.vs.ENSG00000100399.14	0.00217358	-0.00787512	0.404381
ENSG00000100426.6.vs.ENSG00000229409.1	0.00778096	0.643858	0.0109464
ENSG00000100445.15.vs.ENSG00000139899.9	-0.0613761	0.0143576	0.385134
ENSG00000100479.11.vs.ENSG00000165506.13	0.00440613	0.0211	0.330707
ENSG00000100490.8.vs.ENSG00000012983.10	0.103745	0.00275883	0.378892
ENSG00000100519.10.vs.ENSG00000198252.10	-0.00299599	0.0178198	0.00339919
ENSG00000100568.9.vs.ENSG00000072042.11	0.00498851	-0.00251645	0.265307
ENSG00000100596.5.vs.ENSG00000100593.16	-0.0022062	0.286742	0.0960027
ENSG00000100714.14.vs.ENSG00000179841.8	0.00273373	-0.00292782	0.539674
ENSG00000100802.13.vs.ENSG00000100804.17	-0.049312	0.00125757	0.278605
ENSG00000100804.17.vs.ENSG00000280129.1	0.000588199	0.50684	0.396073
ENSG00000100918.11.vs.ENSG00000259529.1	-0.00424884	-0.380017	0.356974
ENSG00000100979.13.vs.ENSG00000124257.6	0.00134095	0.383511	1.44404e-08
ENSG00000100979.13.vs.ENSG00000271984.1	0.00237098	-2.28131	6.48154e-08
ENSG00000100997.17.vs.ENSG00000276952.1	0.00158577	0.168788	0.461014
ENSG00000101052.11.vs.ENSG00000101049.13	-0.0162145	-0.0808043	0.157925
ENSG00000101104.11.vs.ENSG00000166913.11	-0.00946629	4.00458e-05	0.396965
ENSG00000101222.11.vs.ENSG00000101220.16	-0.163942	0.0109901	1.36335e-05
ENSG00000101236.15.vs.ENSG00000275582.1	0.00556207	-0.0109588	0.0725011
ENSG00000101255.9.vs.ENSG00000125826.18	0.000711155	-0.00183285	0.852532
ENSG00000101255.9.vs.ENSG00000125841.11	-0.000845769	0.0015522	0.92002
ENSG00000101310.13.vs.ENSG00000214612.3	-0.000253547	0.406604	0.831179
ENSG00000101336.11.vs.ENSG00000101337.14	-0.0133264	-0.00156476	0.233966
ENSG00000101391.19.vs.ENSG00000101400.5	-0.0167132	-0.00336901	0.285466
ENSG00000101445.8.vs.ENSG00000101447.12	-0.00574683	0.00498648	0.367336
ENSG00000101460.11.vs.ENSG00000125971.15	0.00425011	-0.000725815	0.888575
ENSG00000102003.9.vs.ENSG00000012211.11	0.00527011	0.00626313	0.130309
ENSG00000102003.9.vs.ENSG00000102001.11	0.00603697	-0.0734972	0.0470609
ENSG00000102057.8.vs.ENSG00000068308.12	0.0434658	-0.00609963	0.44201
ENSG00000102057.8.vs.ENSG00000068400.12	0.0413805	-0.00892198	0.31093
ENSG00000102100.13.vs.ENSG00000102096.9	0.00387549	-0.00630906	0.286755
ENSG00000102119.9.vs.ENSG00000147403.15	0.00716681	-0.000320255	0.244602
ENSG00000102226.8.vs.ENSG00000102225.14	-0.00114525	0.00164179	0.420541
ENSG00000102359.5.vs.ENSG00000261295.1	0.0207829	-0.139548	0.0859726
ENSG00000102384.12.vs.ENSG00000126950.7	0.0414092	-0.0346256	0.0669459
ENSG00000102805.12.vs.ENSG00000228002.2	-0.0263494	2.84758	0.0191831
ENSG00000102858.11.vs.ENSG00000168101.13	0.00359157	-0.00802076	0.418687
ENSG00000102870.5.vs.ENSG00000280211.1	-0.00555815	-0.452971	0.13923
ENSG00000102898.10.vs.ENSG00000168286.2	0.0030343	-0.00189652	0.206504
ENSG00000102962.4.vs.ENSG00000006210.6	-0.0176413	0.000655975	0.289934
ENSG00000103034.13.vs.ENSG00000276259.1	0.00386629	-0.0363679	0.791318
ENSG00000103037.10.vs.ENSG00000103034.13	0.011452	0.00319459	0.572079
ENSG00000103037.10.vs.ENSG00000276259.1	0.0169058	-0.127806	0.547963
ENSG00000103043.13.vs.ENSG00000132613.13	0.00317976	0.00665901	0.143233
ENSG00000103043.13.vs.ENSG00000157423.16	0.00797248	-0.147798	0.054617
ENSG00000103064.12.vs.ENSG00000103066.11	0.0184587	0.00260604	0.311645
ENSG00000103067.10.vs.ENSG00000260891.1	3.69204e-05	0.638644	0.232778
ENSG00000103168.15.vs.ENSG00000250685.6	0.00367835	-1.97903	0.461396
ENSG00000103260.7.vs.ENSG00000279255.1	-0.000781658	-0.0913528	0.818183
ENSG00000103264.14.vs.ENSG00000261592.1	0.00242411	1.17155	0.776081
ENSG00000103313.10.vs.ENSG00000010539.10	-0.173451	0.0154909	0.591011
ENSG00000103335.18.vs.ENSG00000278341.1	0.00252734	-0.133199	0.209478
ENSG00000103351.11.vs.ENSG00000262312.2	-0.0119848	-0.596587	0.294161
ENSG00000103485.16.vs.ENSG00000197471.10	0.00283361	-0.0180279	0.147271
ENSG00000103495.12.vs.ENSG00000280789.1	0.00365331	-0.00999269	0.549656
ENSG00000103495.12.vs.ENSG00000281348.1	0.00260097	0.114361	0.635141
ENSG00000103510.18.vs.ENSG00000103507.12	-0.0109395	0.00245168	0.345314
ENSG00000103540.15.vs.ENSG00000103544.13	-0.00539316	-0.00396244	0.254683
ENSG00000103544.13.vs.ENSG00000174628.15	-0.000456659	-0.0313329	0.0928437
ENSG00000103550.12.vs.ENSG00000276571.1	6.14858e-05	0.119787	0.960671
ENSG00000103657.12.vs.ENSG00000259248.4	-0.0018144	-0.0180063	0.685093
ENSG00000104221.11.vs.ENSG00000156675.14	0.0214305	-0.00164837	0.0339563
ENSG00000104341.15.vs.ENSG00000202399.1	-0.000112532	1.93864	0.0648889
ENSG00000104524.12.vs.ENSG00000104522.14	0.00205384	0.0019513	0.0541315
ENSG00000104524.12.vs.ENSG00000104529.16	0.00596943	-0.000379499	0.197753
ENSG00000104635.12.vs.ENSG00000120910.13	0.0016555	-0.0267371	0.468216
ENSG00000104824.15.vs.ENSG00000104823.7	0.0021589	0.000423409	0.529664
ENSG00000104852.13.vs.ENSG00000104863.10	-0.00253764	0.0925452	0.0661453
ENSG00000104870.11.vs.ENSG00000142534.5	0.000774412	-0.000110879	0.589154
ENSG00000104870.11.vs.ENSG00000142552.6	0.000109871	0.00214532	6.4917e-05
ENSG00000104957.12.vs.ENSG00000037757.12	0.00685212	0.00389089	0.420223
ENSG00000104980.6.vs.ENSG00000260500.1	0.00977323	-1.15853	0.0467345
ENSG00000105058.10.vs.ENSG00000072958.7	-0.00742959	0.0140792	0.0912781
ENSG00000105131.6.vs.ENSG00000141867.16	0.00956552	-0.00262855	0.213825
ENSG00000105136.18.vs.ENSG00000152439.11	0.0190548	-0.0352954	0.762373
ENSG00000105137.11.vs.ENSG00000268564.1	0.0111741	-0.239877	0.27654
ENSG00000105176.16.vs.ENSG00000267258.1	-4.36746e-06	1.57066	0.388455
ENSG00000105219.7.vs.ENSG00000105221.15	0.00732885	-0.000244757	0.594807
ENSG00000105219.7.vs.ENSG00000174521.7	0.00600216	0.073547	0.502713
ENSG00000105227.13.vs.ENSG00000160396.8	-0.0374416	-0.124729	0.282625
ENSG00000105270.13.vs.ENSG00000181392.13	0.00558328	0.011827	0.176906
ENSG00000105321.11.vs.ENSG00000257704.3	-0.0135697	0.018279	0.00222444
ENSG00000105323.15.vs.ENSG00000142039.3	0.00176555	-0.0099921	0.390967
ENSG00000105355.7.vs.ENSG00000127666.9	0.00486506	0.0123246	0.0208361
ENSG00000105369.8.vs.ENSG00000076928.16	-0.00939567	0.00465416	0.158132
ENSG00000105372.5.vs.ENSG00000105369.8	0.000102902	-0.00579856	0.474079
ENSG00000105374.8.vs.ENSG00000105379.8	-0.0230034	0.00490975	0.00814621
ENSG00000105402.6.vs.ENSG00000118156.11	-0.00296708	0.0100671	0.519939
ENSG00000105409.14.vs.ENSG00000105404.9	0.00994045	0.00262744	0.00607229
ENSG00000105523.3.vs.ENSG00000268093.1	0.00176585	-0.280302	0.85147
ENSG00000105552.13.vs.ENSG00000087076.7	0.00244367	-0.00170809	0.806057
ENSG00000105642.14.vs.ENSG00000007080.9	-0.278018	0.00635365	0.0689688
ENSG00000105643.8.vs.ENSG00000105642.14	0.00909418	-0.27657	0.13486
ENSG00000105647.13.vs.ENSG00000099308.9	0.0349882	-0.0198427	0.486924
ENSG00000105647.13.vs.ENSG00000216490.3	0.0375204	0.0300929	0.852954
ENSG00000105650.20.vs.ENSG00000130518.15	0.294569	-0.0268591	0.101864
ENSG00000105655.17.vs.ENSG00000105656.11	-1.36551e-05	-0.00941964	0.833139
ENSG00000105695.13.vs.ENSG00000012124.13	8.16419e-06	-0.00950387	0.648288
ENSG00000105695.13.vs.ENSG00000105697.6	-0.00574026	-0.0593629	0.737369
ENSG00000105699.15.vs.ENSG00000105698.14	0.000361677	0.00198708	0.275836
ENSG00000105701.14.vs.ENSG00000105656.11	0.00147425	-0.022088	0.177358
ENSG00000105711.9.vs.ENSG00000089351.13	-0.00615643	0.0068061	0.00249782
ENSG00000105755.6.vs.ENSG00000176531.9	0.00415966	0.00334289	0.776772
ENSG00000105767.2.vs.ENSG00000011422.10	-0.00657036	0.00365984	0.224526
ENSG00000105767.2.vs.ENSG00000131116.10	-0.0105158	0.0113109	0.101325
ENSG00000105829.10.vs.ENSG00000278959.1	-0.00721492	0.647831	0.0734025
ENSG00000105852.9.vs.ENSG00000105854.11	-0.00866796	-0.00136656	0.48982
ENSG00000105880.4.vs.ENSG00000231764.7	0.0161098	-0.00866684	0.0976132
ENSG00000105939.11.vs.ENSG00000146858.7	0.00790199	0.031192	0.0547213
ENSG00000105997.21.vs.ENSG00000078399.14	-0.0739186	0.00773565	0.315251
ENSG00000105997.21.vs.ENSG00000105996.6	-0.0211627	-0.242353	0.269197
ENSG00000106004.4.vs.ENSG00000106006.6	-0.0217988	-0.00730038	0.74435
ENSG00000106153.12.vs.ENSG00000164776.8	0.000325929	-0.00157573	0.823644
ENSG00000106153.12.vs.ENSG00000185290.3	7.96442e-05	0.0102212	0.838632
ENSG00000106258.12.vs.ENSG00000224448.1	0.00830449	-1.28081	0.825898
ENSG00000106333.11.vs.ENSG00000106330.10	0.000545391	0.000302604	4.20598e-05
ENSG00000106333.11.vs.ENSG00000106336.11	0.000530279	0.0793502	3.33614e-05
ENSG00000106479.9.vs.ENSG00000171130.16	-0.0059721	-0.00281158	0.402768
ENSG00000106484.13.vs.ENSG00000270953.1	0.000581662	0.0656311	0.763497
ENSG00000106633.14.vs.ENSG00000106631.7	-0.0732499	-0.0184512	0.812768
ENSG00000106682.13.vs.ENSG00000086730.15	5.12089e-05	-0.0225308	0.347746
ENSG00000106701.10.vs.ENSG00000070214.14	0.00692969	-0.00190419	0.366712
ENSG00000106785.13.vs.ENSG00000106789.11	-0.0028184	-0.000323605	0.686503
ENSG00000106789.11.vs.ENSG00000095383.18	-0.00155052	0.000468877	0.877827
ENSG00000106809.9.vs.ENSG00000127083.7	7.33059e-05	-0.00649366	0.697532
ENSG00000106948.15.vs.ENSG00000095397.12	-0.00610209	-0.00899913	0.264278
ENSG00000107020.8.vs.ENSG00000231967.1	-0.0311228	0.10664	0.00469404
ENSG00000107281.8.vs.ENSG00000054179.10	0.00202061	0.00134119	0.15444
ENSG00000107281.8.vs.ENSG00000180549.7	0.00212833	-0.238503	0.0412379
ENSG00000107331.15.vs.ENSG00000180549.7	0.0025772	-0.227685	0.109763
ENSG00000107438.7.vs.ENSG00000234026.1	-0.00211956	-0.600624	0.226393
ENSG00000107625.11.vs.ENSG00000165730.13	0.00569144	-0.0156438	0.554549
ENSG00000107625.11.vs.ENSG00000165732.11	-0.00420449	0.00200892	0.505049
ENSG00000107738.18.vs.ENSG00000214688.4	0.00121799	-1.48695	0.49573
ENSG00000107874.9.vs.ENSG00000059915.15	-0.00137176	0.0250486	0.0329653
ENSG00000107902.12.vs.ENSG00000278831.1	0.00927694	-0.0363188	0.467233
ENSG00000108187.14.vs.ENSG00000204130.11	-0.0375651	0.0138321	0.269544
ENSG00000108352.10.vs.ENSG00000108349.13	-0.00389506	-0.00031097	0.411018
ENSG00000108375.11.vs.ENSG00000176160.8	-0.00358409	0.440659	0.0254982
ENSG00000108389.8.vs.ENSG00000108387.13	-0.00390084	0.00162384	0.495801
ENSG00000108405.3.vs.ENSG00000004660.13	-0.154407	-0.00108938	0.187442
ENSG00000108405.3.vs.ENSG00000074370.16	-0.154176	4.83847e-05	0.187332
ENSG00000108506.10.vs.ENSG00000136492.7	0.0130976	-0.0181015	0.305202
ENSG00000108511.9.vs.ENSG00000120068.6	-0.00456316	-7.09171e-05	0.786708
ENSG00000108587.13.vs.ENSG00000108582.10	0.0102749	-0.00303236	0.062733
ENSG00000108592.15.vs.ENSG00000108604.14	0.00147492	-0.00111531	0.823826
ENSG00000108639.6.vs.ENSG00000187997.10	-0.00028963	0.319358	0.841873
ENSG00000108639.6.vs.ENSG00000267679.1	-0.000308385	1.52787	0.509658
ENSG00000108654.10.vs.ENSG00000256525.5	-0.00133861	0.0332445	0.0902965
ENSG00000108669.15.vs.ENSG00000055483.18	-0.0126161	-0.00145575	0.0685767
ENSG00000108671.8.vs.ENSG00000176749.7	0.000288731	0.0178817	0.287719
ENSG00000108784.8.vs.ENSG00000108786.9	0.00724806	-0.0123932	0.063341
ENSG00000108784.8.vs.ENSG00000267185.1	0.00621109	0.34933	0.101062
ENSG00000108785.7.vs.ENSG00000108784.8	0.220834	0.00634625	0.0485594
ENSG00000108786.9.vs.ENSG00000068120.13	-0.00962337	0.00175985	0.678856
ENSG00000108799.11.vs.ENSG00000214578.5	-0.0142044	0.0400301	0.270136
ENSG00000108819.10.vs.ENSG00000253730.1	-0.00169605	-0.837827	0.559468
ENSG00000108829.9.vs.ENSG00000279792.1	-0.000100063	0.0743432	0.973904
ENSG00000108840.14.vs.ENSG00000161654.8	0.00702806	-0.00426749	0.0780175
ENSG00000108861.7.vs.ENSG00000167941.2	-0.000291976	-0.00865796	0.995403
ENSG00000108947.4.vs.ENSG00000183914.13	-0.0080833	0.00174721	0.887242
ENSG00000108963.16.vs.ENSG00000228133.2	-0.00943578	-0.640993	0.425386
ENSG00000109089.7.vs.ENSG00000167862.8	0.00805742	-0.0158106	0.0857568
ENSG00000109270.11.vs.ENSG00000164031.15	-0.0144605	0.0119965	0.143829
ENSG00000109654.13.vs.ENSG00000121211.6	0.00212345	0.016228	0.155061
ENSG00000109758.7.vs.ENSG00000159788.17	-0.185261	0.00376623	0.689667
ENSG00000109854.12.vs.ENSG00000185238.11	0.00566631	-0.00686565	0.392837
ENSG00000109906.12.vs.ENSG00000166741.6	-0.0699949	0.00123884	0.0758487
ENSG00000109944.9.vs.ENSG00000109943.7	0.00115619	-0.0883976	0.434219
ENSG00000110011.12.vs.ENSG00000149781.11	0.00349525	-0.00302634	0.728675
ENSG00000110011.12.vs.ENSG00000173486.11	0.0016212	0.000894851	0.816408
ENSG00000110076.17.vs.ENSG00000068831.17	0.00921047	-0.00578178	0.0954648
ENSG00000110090.11.vs.ENSG00000132749.9	0.000441798	-0.000295366	0.949546
ENSG00000110169.9.vs.ENSG00000110171.17	-0.00326764	0.00495132	0.399477
ENSG00000110200.7.vs.ENSG00000149357.8	0.0112603	-0.000255588	0.879069
ENSG00000110243.10.vs.ENSG00000109917.9	0.37132	0.00718452	0.357096
ENSG00000110330.7.vs.ENSG00000023445.12	0.00292425	-0.00556942	0.264377
ENSG00000110497.13.vs.ENSG00000180720.7	-0.0170883	-0.000210967	0.129412
ENSG00000110651.10.vs.ENSG00000184281.13	0.000948036	-0.002355	0.0740922
ENSG00000110719.8.vs.ENSG00000006534.14	0.00261118	-0.00252139	0.0323742
ENSG00000110723.10.vs.ENSG00000178202.11	0.00736738	-0.000165765	0.724358
ENSG00000110786.16.vs.ENSG00000179057.12	-0.020739	0.0159241	0.891358
ENSG00000110799.12.vs.ENSG00000047617.13	-0.000150913	-0.0316295	0.661558
ENSG00000110841.12.vs.ENSG00000276261.1	-0.00200234	0.596731	0.342273
ENSG00000110917.6.vs.ENSG00000175970.8	-0.000998532	0.00554209	0.670609
ENSG00000110955.7.vs.ENSG00000076108.10	0.00076917	-0.00301244	0.133633
ENSG00000111077.16.vs.ENSG00000063046.16	0.000290387	-0.000867779	0.52721
ENSG00000111196.8.vs.ENSG00000060140.7	0.00602074	-0.0173161	0.650262
ENSG00000111276.9.vs.ENSG00000178878.11	-0.00154977	-0.00259312	0.545251
ENSG00000111300.8.vs.ENSG00000274227.1	0.0113911	-0.307022	0.167015
ENSG00000111319.11.vs.ENSG00000067182.6	-0.00172582	0.0010256	0.35365
ENSG00000111331.11.vs.ENSG00000111335.11	-0.000977995	-0.000214532	0.392344
ENSG00000111348.7.vs.ENSG00000139055.5	-0.0016212	-0.002154	0.20503
ENSG00000111405.7.vs.ENSG00000079337.14	0.0235325	-0.0148099	0.332795
ENSG00000111405.7.vs.ENSG00000280054.1	0.0206701	0.0245568	0.922153
ENSG00000111445.12.vs.ENSG00000276292.1	0.015102	-2.39287	0.298122
ENSG00000111615.11.vs.ENSG00000257497.2	-0.00918706	0.0642727	0.307991
ENSG00000111642.13.vs.ENSG00000111641.9	0.000290739	-0.00017542	0.970997
ENSG00000111664.9.vs.ENSG00000250510.6	0.0338216	-0.0399515	0.232793
ENSG00000111670.13.vs.ENSG00000139351.13	0.00323972	-0.219726	0.399164
ENSG00000111679.15.vs.ENSG00000111676.13	-0.00657548	0.000387916	0.385027
ENSG00000111679.15.vs.ENSG00000271969.1	-0.00677102	0.540818	0.302049
ENSG00000111684.9.vs.ENSG00000238795.1	-0.0136625	-0.00289842	0.356932
ENSG00000111716.11.vs.ENSG00000121361.3	0.00024721	-0.000142654	0.648377
ENSG00000111837.10.vs.ENSG00000222383.1	-0.118527	-0.417316	0.16926
ENSG00000111846.14.vs.ENSG00000205318.5	0.00311281	0.947331	0.337773
ENSG00000111860.12.vs.ENSG00000216809.1	-0.0237774	-0.158988	0.615628
ENSG00000111911.6.vs.ENSG00000066651.16	-0.00438629	0.00607003	0.702678
ENSG00000111981.4.vs.ENSG00000231120.3	0.0469552	1.4102	0.0352585
ENSG00000112031.14.vs.ENSG00000091844.6	-0.00625726	0.0738492	0.123959
ENSG00000112039.3.vs.ENSG00000276712.1	0.00279316	-1.20803	0.773819
ENSG00000112208.11.vs.ENSG00000112200.15	0.017911	-0.000199218	0.0768509
ENSG00000112308.11.vs.ENSG00000272345.1	-0.000305322	0.0352156	0.960167
ENSG00000112655.14.vs.ENSG00000112658.7	0.00170193	-0.00339466	0.125636
ENSG00000112655.14.vs.ENSG00000137171.13	0.00174589	-0.0120508	0.0629596
ENSG00000112763.14.vs.ENSG00000111801.14	-0.0066814	-0.0103944	0.193594
ENSG00000112852.6.vs.ENSG00000113205.4	0.0154727	0.0267452	8.29261e-05
ENSG00000112964.12.vs.ENSG00000270513.1	-0.00040959	1.21006	0.85351
ENSG00000113212.6.vs.ENSG00000120322.3	0.00339299	0.0183352	0.621101
ENSG00000113212.6.vs.ENSG00000272674.3	-0.00289787	0.0144831	0.401179
ENSG00000113269.12.vs.ENSG00000278965.1	-0.000614765	-0.605092	0.654828
ENSG00000113272.12.vs.ENSG00000155858.5	-0.000879813	0.0364349	0.426117
ENSG00000113387.10.vs.ENSG00000249142.1	-0.00107565	-1.13204	0.277506
ENSG00000113460.11.vs.ENSG00000168724.13	0.00805998	-0.00598108	0.300219
ENSG00000113520.9.vs.ENSG00000230612.2	-6.35768	0.482543	0.0823041
ENSG00000113552.14.vs.ENSG00000254099.1	-3.77812e-05	0.201002	0.971805
ENSG00000113569.14.vs.ENSG00000270558.1	0.00336692	0.0340631	0.402755
ENSG00000113594.8.vs.ENSG00000251257.2	-0.0111559	1.52253	0.00404227
ENSG00000113621.13.vs.ENSG00000279799.1	0.00266391	0.00816517	0.861274
ENSG00000113638.11.vs.ENSG00000132356.10	-0.00437658	0.00146995	0.931183
ENSG00000113643.7.vs.ENSG00000188573.7	0.00292601	0.0427076	0.376044
ENSG00000113716.11.vs.ENSG00000155850.7	-0.00349148	4.21078e-05	0.809802
ENSG00000113722.15.vs.ENSG00000011083.7	0.0407658	0.0142325	0.857446
ENSG00000113732.7.vs.ENSG00000253785.1	-0.000184451	0.515673	0.633933
ENSG00000113758.12.vs.ENSG00000246334.2	0.00351188	0.254615	0.000630065
ENSG00000113758.12.vs.ENSG00000279821.1	0.00503548	-0.653052	0.0031137
ENSG00000113812.12.vs.ENSG00000113811.9	-0.0177388	-0.00560952	0.312862
ENSG00000113812.12.vs.ENSG00000271976.1	-0.0253639	0.0389715	0.312268
ENSG00000113851.12.vs.ENSG00000281584.1	-0.00688579	-1.93155	0.469995
ENSG00000114021.10.vs.ENSG00000036054.11	0.001952	0.00721215	0.345754
ENSG00000114127.9.vs.ENSG00000175054.13	-0.00678058	0.00905978	0.630708
ENSG00000114270.14.vs.ENSG00000010256.9	-0.00323799	0.00111819	0.626938
ENSG00000114270.14.vs.ENSG00000114268.10	-0.00341548	0.0109457	0.552654
ENSG00000114331.11.vs.ENSG00000173950.14	0.00327047	0.0109019	0.205625
ENSG00000114383.8.vs.ENSG00000114378.15	-0.0219243	0.0312147	0.000140809
ENSG00000114391.11.vs.ENSG00000066422.4	0.000283999	0.00415889	0.651568
ENSG00000114491.12.vs.ENSG00000160145.14	0.00662265	0.00369802	0.482285
ENSG00000114520.9.vs.ENSG00000144909.7	-0.0116745	0.0129165	0.494856
ENSG00000114520.9.vs.ENSG00000252965.1	-0.00548125	0.675032	0.481012
ENSG00000114544.14.vs.ENSG00000144908.12	0.0103012	0.0107675	0.0463692
ENSG00000114646.8.vs.ENSG00000173473.9	-0.0182312	0.000663442	0.813046
ENSG00000114770.15.vs.ENSG00000223529.1	0.00140562	0.428435	0.221818
ENSG00000114854.6.vs.ENSG00000010319.5	0.0108322	-0.00182734	0.900459
ENSG00000114993.14.vs.ENSG00000233155.1	0.00749128	0.44667	0.117653
ENSG00000115226.8.vs.ENSG00000138002.13	0.0293438	-0.0079504	0.120112
ENSG00000115266.10.vs.ENSG00000115268.8	0.0463962	0.00031721	0.275063
ENSG00000115268.8.vs.ENSG00000071626.15	-0.000231729	0.00668412	0.0629153
ENSG00000115275.10.vs.ENSG00000204822.6	0.00566515	0.0552296	0.0986791
ENSG00000115286.18.vs.ENSG00000160953.13	0.00955929	-0.0018566	0.0497656
ENSG00000115364.12.vs.ENSG00000270462.1	0.0102031	0.33388	0.0667533
ENSG00000115504.13.vs.ENSG00000115507.8	-0.000575166	0.0313488	0.00447988
ENSG00000115524.14.vs.ENSG00000213104.3	-0.00139747	2.5162	0.0141654
ENSG00000115594.10.vs.ENSG00000115598.8	0.000518797	0.102273	0.000620899
ENSG00000115649.14.vs.ENSG00000213901.9	-0.000853875	-0.0481727	0.932767
ENSG00000115649.14.vs.ENSG00000280537.1	-0.000731046	0.197341	0.866987
ENSG00000115760.12.vs.ENSG00000018699.10	0.00143086	0.00450853	0.512367
ENSG00000115808.10.vs.ENSG00000279519.1	0.00494758	0.0623319	0.0213626
ENSG00000115841.18.vs.ENSG00000232973.10	-0.0867858	-0.041935	0.459348
ENSG00000115850.8.vs.ENSG00000076003.4	0.032243	0.000615233	0.480261
ENSG00000115902.9.vs.ENSG00000232613.5	-0.00412649	-0.402325	0.028068
ENSG00000115998.6.vs.ENSG00000231414.1	0.0262107	1.48407	0.279667
ENSG00000116001.14.vs.ENSG00000231414.1	0.00372077	1.39558	0.180179
ENSG00000116014.8.vs.ENSG00000116017.9	0.00337274	0.0180893	0.407609
ENSG00000116017.9.vs.ENSG00000065268.9	0.0152976	0.00692881	0.159367
ENSG00000116030.15.vs.ENSG00000223825.5	0.00148228	0.0356306	0.841323
ENSG00000116032.5.vs.ENSG00000065268.9	0.0871404	0.00744943	0.218682
ENSG00000116039.10.vs.ENSG00000116035.2	-0.00187405	-0.000901748	0.772006
ENSG00000116095.9.vs.ENSG00000237298.7	-0.00238119	-0.000615138	0.983862
ENSG00000116199.10.vs.ENSG00000186283.12	5.6485e-05	-0.00334968	0.713157
ENSG00000116254.16.vs.ENSG00000116251.8	0.0192877	-0.00110361	0.0538487
ENSG00000116396.12.vs.ENSG00000197106.6	0.0089732	0.00683792	0.224533
ENSG00000116478.10.vs.ENSG00000182866.15	-0.000729849	-0.0120994	0.445954
ENSG00000116489.11.vs.ENSG00000155363.17	0.00372106	-0.00765507	0.0599455
ENSG00000116525.12.vs.ENSG00000278997.1	-0.00299783	-0.075809	0.917897
ENSG00000116584.16.vs.ENSG00000163479.12	0.00019259	0.000443873	0.658917
ENSG00000116678.17.vs.ENSG00000116675.14	-0.00597561	0.010866	0.469646
ENSG00000116691.9.vs.ENSG00000116688.15	0.00452989	-0.00468833	0.171884
ENSG00000116729.12.vs.ENSG00000229133.1	-0.00268394	0.465356	0.281377
ENSG00000116748.18.vs.ENSG00000175984.13	-0.0154985	-0.0226862	0.85144
ENSG00000116752.5.vs.ENSG00000175984.13	-0.00318313	-0.0135117	0.851643
ENSG00000116771.5.vs.ENSG00000272510.1	-0.0431503	1.79779	0.238815
ENSG00000116786.10.vs.ENSG00000162460.6	0.00426362	0.0844098	0.112275
ENSG00000116898.10.vs.ENSG00000116885.17	0.0044685	-0.0520817	0.00233562
ENSG00000116898.10.vs.ENSG00000119535.16	0.00332954	-0.00262697	0.231864
ENSG00000116957.11.vs.ENSG00000230026.2	0.00663157	1.46192	0.25344
ENSG00000117069.13.vs.ENSG00000230498.1	0.00991019	-0.515698	0.189274
ENSG00000117118.8.vs.ENSG00000159363.16	-0.000338897	0.000739293	0.958159
ENSG00000117122.12.vs.ENSG00000159363.16	0.00814996	0.000528978	4.04239e-05
ENSG00000117153.14.vs.ENSG00000183155.4	-0.00644242	0.0222132	0.106185
ENSG00000117222.12.vs.ENSG00000174529.7	-0.00558162	0.0872495	0.315273
ENSG00000117308.13.vs.ENSG00000117305.13	0.00266371	-0.00843922	0.446877
ENSG00000117322.15.vs.ENSG00000203710.9	-0.00025767	-0.00452935	0.988091
ENSG00000117410.12.vs.ENSG00000132768.12	0.00146688	0.00407504	0.240863
ENSG00000117411.15.vs.ENSG00000132768.12	0.00757376	-0.00575064	0.0210034
ENSG00000117425.12.vs.ENSG00000070785.15	-0.0121757	0.0135463	0.291486
ENSG00000117594.8.vs.ENSG00000123689.5	-0.0334287	0.00575362	0.205266
ENSG00000117682.15.vs.ENSG00000131914.9	0.00185109	0.0152641	0.107135
ENSG00000117682.15.vs.ENSG00000198830.9	0.00389938	-0.00067964	0.855917
ENSG00000117713.16.vs.ENSG00000060642.9	-0.00269639	-0.0140575	0.145347
ENSG00000117758.12.vs.ENSG00000117751.16	-0.00671518	0.00479162	0.61161
ENSG00000118113.10.vs.ENSG00000137675.4	0.028169	-1.30863	0.577254
ENSG00000118160.12.vs.ENSG00000105419.16	-0.0115924	-0.0132205	0.108204
ENSG00000118292.7.vs.ENSG00000159208.14	0.0282747	0.019246	0.0649056
ENSG00000118402.5.vs.ENSG00000218582.2	0.00760515	0.58904	0.122945
ENSG00000118473.20.vs.ENSG00000152760.8	0.033551	-0.122924	0.02283
ENSG00000118816.8.vs.ENSG00000214062.5	-0.000850334	0.389254	0.31404
ENSG00000118873.14.vs.ENSG00000232134.1	-0.000490265	-0.119655	0.881739
ENSG00000119231.9.vs.ENSG00000225578.1	0.00851653	0.0454552	0.348483
ENSG00000119326.13.vs.ENSG00000106771.11	0.00141295	0.000386093	0.972263
ENSG00000119333.10.vs.ENSG00000234705.1	0.00178247	-0.419922	0.346303
ENSG00000119333.10.vs.ENSG00000280758.1	0.00156875	-0.800725	0.314648
ENSG00000119335.15.vs.ENSG00000160447.6	0.00106336	0.017259	0.0580563
ENSG00000119431.8.vs.ENSG00000148218.14	0.00440621	-0.00502359	0.497617
ENSG00000119559.14.vs.ENSG00000267317.2	0.00633601	0.039251	0.194684
ENSG00000119640.7.vs.ENSG00000119684.14	0.00254154	-0.00648913	0.887937
ENSG00000119673.13.vs.ENSG00000279026.1	-0.0140645	0.00316484	0.37678
ENSG00000119684.14.vs.ENSG00000258646.1	-0.00682432	0.118262	0.886025
ENSG00000119737.5.vs.ENSG00000265452.1	0.00873244	-0.145332	0.914676
ENSG00000119777.17.vs.ENSG00000084764.9	0.00390388	0.00527541	0.0596334
ENSG00000119922.8.vs.ENSG00000232110.6	0.000305716	-0.227212	0.926236
ENSG00000119943.9.vs.ENSG00000107521.17	-0.0215531	-0.00410089	0.266335
ENSG00000120029.11.vs.ENSG00000120049.17	-0.00509179	0.00333955	0.859789
ENSG00000120075.5.vs.ENSG00000108511.9	0.0271851	-0.0277577	0.0186984
ENSG00000120093.10.vs.ENSG00000120068.6	0.00135352	-0.0072361	0.751797
ENSG00000120318.14.vs.ENSG00000197948.9	0.0288447	-0.0323372	0.0191752
ENSG00000120324.6.vs.ENSG00000120322.3	0.0563968	-0.00165884	0.103084
ENSG00000120324.6.vs.ENSG00000197479.6	0.0597731	-0.00991185	0.0937915
ENSG00000120327.6.vs.ENSG00000187372.11	0.0418256	-0.028106	0.0249327
ENSG00000120328.6.vs.ENSG00000187372.11	0.0834171	-0.00587931	0.457429
ENSG00000120328.6.vs.ENSG00000197479.6	0.10452	-0.0183725	0.425968
ENSG00000120437.8.vs.ENSG00000146457.13	-0.00773862	0.00210786	0.611008
ENSG00000120440.12.vs.ENSG00000112494.8	0.251654	0.0455914	0.405424
ENSG00000120669.14.vs.ENSG00000242715.6	0.0449912	0.0930304	0.134464
ENSG00000120697.7.vs.ENSG00000102710.18	-0.00336014	0.00260695	0.883361
ENSG00000120709.9.vs.ENSG00000120733.12	0.0120182	-0.00610686	0.0784627
ENSG00000120738.7.vs.ENSG00000241458.1	-0.000385686	0.802841	0.101524
ENSG00000120784.14.vs.ENSG00000198182.11	-0.00256413	0.0277399	0.0287274
ENSG00000120913.22.vs.ENSG00000241852.8	0.015916	-0.0197655	0.246107
ENSG00000120948.14.vs.ENSG00000271895.2	-0.00449645	-0.248337	0.0853454
ENSG00000121318.2.vs.ENSG00000256651.1	0.733731	-1.41594	0.784851
ENSG00000121406.7.vs.ENSG00000152439.11	0.0555894	-0.10129	0.113258
ENSG00000121671.10.vs.ENSG00000121653.10	-0.0160578	0.0105007	0.0175771
ENSG00000121775.16.vs.ENSG00000025800.12	0.0197377	0.0014062	0.16538
ENSG00000121904.16.vs.ENSG00000235907.2	0.0150273	1.03102	0.420406
ENSG00000121940.14.vs.ENSG00000085433.14	0.00751959	-0.00867066	0.778719
ENSG00000122068.11.vs.ENSG00000186001.11	-0.00176477	0.0129748	0.485156
ENSG00000122085.15.vs.ENSG00000225521.1	-0.00930102	-0.620112	0.631502
ENSG00000122375.10.vs.ENSG00000122367.18	1.54863	-0.051703	0.0022022
ENSG00000122386.9.vs.ENSG00000085644.12	-0.00387196	0.0048741	0.799531
ENSG00000122477.11.vs.ENSG00000137992.13	0.130794	0.00717626	0.367255
ENSG00000122694.14.vs.ENSG00000185972.5	0.00188141	0.288002	0.14278
ENSG00000122912.13.vs.ENSG00000138346.13	-0.0183355	0.0252232	0.0178576
ENSG00000122971.7.vs.ENSG00000175970.8	-0.00323554	0.00209126	0.832208
ENSG00000123144.9.vs.ENSG00000105576.14	0.00153979	0.00506122	0.00902393
ENSG00000123159.14.vs.ENSG00000160951.3	0.000556109	0.732407	0.00324137
ENSG00000123338.11.vs.ENSG00000123360.10	-0.00972498	0.0591166	0.00403171
ENSG00000123342.14.vs.ENSG00000135392.14	0.00213393	-0.00719015	0.721585
ENSG00000123342.14.vs.ENSG00000257390.4	0.00442413	0.77996	0.417307
ENSG00000123349.12.vs.ENSG00000135476.10	-0.000752952	0.00463234	0.546854
ENSG00000123388.4.vs.ENSG00000274817.1	0.00835143	-0.797808	0.74885
ENSG00000123388.4.vs.ENSG00000277129.1	0.00256313	0.524417	0.84172
ENSG00000123395.13.vs.ENSG00000123358.18	0.00342366	-0.000360606	0.86127
ENSG00000123407.3.vs.ENSG00000274817.1	0.017846	-1.13728	0.00418781
ENSG00000123407.3.vs.ENSG00000277129.1	0.0160461	0.0938774	0.00663219
ENSG00000123411.13.vs.ENSG00000139531.11	-0.0497852	-0.0067031	0.07665
ENSG00000123453.15.vs.ENSG00000225756.1	0.00903442	-0.307331	0.120068
ENSG00000123838.9.vs.ENSG00000123843.11	0.00162306	-0.0353145	0.792337
ENSG00000123870.10.vs.ENSG00000167562.10	0.0064706	-0.0577814	0.0958499
ENSG00000123933.13.vs.ENSG00000214367.6	0.00300878	0.00601623	0.395575
ENSG00000123975.4.vs.ENSG00000187742.13	0.00618295	-0.000180468	0.0505528
ENSG00000123999.4.vs.ENSG00000269068.1	-0.00559216	-0.136099	0.936195
ENSG00000124006.13.vs.ENSG00000268896.1	0.0018175	0.405899	0.474394
ENSG00000124067.15.vs.ENSG00000141096.4	-0.000130243	-1.22417	0.591848
ENSG00000124134.7.vs.ENSG00000175121.10	0.0114654	-0.0945917	0.717499
ENSG00000124155.15.vs.ENSG00000244274.6	0.000695694	-0.0702363	0.140683
ENSG00000124226.9.vs.ENSG00000229222.1	-0.00287667	0.419035	0.434043
ENSG00000124257.6.vs.ENSG00000271984.1	0.809315	-1.24486	0.000722074
ENSG00000124313.11.vs.ENSG00000126012.10	0.00509953	-0.00161456	0.412229
ENSG00000124391.4.vs.ENSG00000158545.14	-0.0729444	0.00809161	0.308967
ENSG00000124440.14.vs.ENSG00000011485.13	0.0070832	0.00658592	0.40102
ENSG00000124508.15.vs.ENSG00000026950.15	-0.0135034	-0.00428329	0.248239
ENSG00000124508.15.vs.ENSG00000186470.12	-0.0183293	-0.001385	0.271204
ENSG00000124541.6.vs.ENSG00000112640.13	0.00450769	-0.000245615	0.562803
ENSG00000124541.6.vs.ENSG00000137171.13	0.00753504	-0.0112893	0.324076
ENSG00000124549.13.vs.ENSG00000026950.15	0.0600696	-0.00963277	0.231567
ENSG00000124549.13.vs.ENSG00000111801.14	0.0595786	-0.0136363	0.160623
ENSG00000124587.12.vs.ENSG00000181524.6	0.00272618	0.0205068	0.449736
ENSG00000124701.5.vs.ENSG00000001167.13	-0.241122	0.00130094	0.62392
ENSG00000124701.5.vs.ENSG00000112212.10	-0.2209	0.167251	0.931096
ENSG00000124766.5.vs.ENSG00000220771.2	0.00104847	0.809051	0.131839
ENSG00000124802.10.vs.ENSG00000188428.15	0.0275907	-0.0259026	0.32368
ENSG00000124802.10.vs.ENSG00000259040.4	0.0100172	0.122428	0.00206028
ENSG00000124942.12.vs.ENSG00000254772.8	-0.00023648	0.0120765	0.255075
ENSG00000125046.13.vs.ENSG00000180914.9	-0.0213542	-0.00585065	0.471215
ENSG00000125046.13.vs.ENSG00000227110.5	-0.0303152	0.108883	0.517479
ENSG00000125089.15.vs.ENSG00000250471.2	0.0103266	0.536743	0.214771
ENSG00000125149.10.vs.ENSG00000067955.12	-0.0073874	0.00497724	0.520465
ENSG00000125257.12.vs.ENSG00000223298.1	0.000338414	0.04858	0.964989
ENSG00000125347.12.vs.ENSG00000234290.2	-0.00478176	-0.0981765	0.0606005
ENSG00000125414.17.vs.ENSG00000109061.9	-0.00969689	-0.0240317	0.849879
ENSG00000125449.5.vs.ENSG00000170190.14	-0.0219824	0.00363538	0.35044
ENSG00000125498.18.vs.ENSG00000243772.5	-1.30675	0.8614	0.917012
ENSG00000125503.11.vs.ENSG00000267507.1	0.00483268	0.0143498	0.500153
ENSG00000125611.14.vs.ENSG00000125630.14	0.00131955	0.000155665	0.982018
ENSG00000125735.9.vs.ENSG00000125730.15	-0.0264875	-0.000151733	0.56452
ENSG00000125741.4.vs.ENSG00000125746.13	0.0158509	-0.00367564	0.317971
ENSG00000125746.13.vs.ENSG00000177464.4	-0.00225451	0.0274158	0.231801
ENSG00000125753.12.vs.ENSG00000213889.9	0.00404809	-0.00947862	0.0957008
ENSG00000125787.10.vs.ENSG00000132670.19	0.977861	-0.00400158	0.217234
ENSG00000125810.9.vs.ENSG00000279447.1	-0.00217173	1.74595	0.41506
ENSG00000125821.10.vs.ENSG00000101310.13	0.00358823	-0.0010909	0.406061
ENSG00000125900.11.vs.ENSG00000101307.14	0.83337	-0.00319728	0.901852
ENSG00000125910.5.vs.ENSG00000125912.9	-0.0590327	0.00882961	0.00217214
ENSG00000125952.17.vs.ENSG00000272158.1	-0.00073359	0.0755172	0.98228
ENSG00000126062.3.vs.ENSG00000007402.10	0.00135369	0.00259093	0.634059
ENSG00000126091.18.vs.ENSG00000117407.15	0.0512033	-0.0101175	4.31276e-06
ENSG00000126218.10.vs.ENSG00000126231.12	-0.0108254	0.0546186	0.774971
ENSG00000126246.8.vs.ENSG00000267439.1	-0.137255	1.25505	0.230393
ENSG00000126254.10.vs.ENSG00000105672.13	0.00383669	0.105835	0.0071522
ENSG00000126266.3.vs.ENSG00000012124.13	1.76525	-0.0158367	0.0544196
ENSG00000126266.3.vs.ENSG00000185897.6	1.25104	2.87856	0.0132433
ENSG00000126267.7.vs.ENSG00000105668.6	0.00142372	-0.0709649	0.104642
ENSG00000126267.7.vs.ENSG00000105672.13	-0.000525375	0.23924	0.0113349
ENSG00000126337.12.vs.ENSG00000171401.13	-0.424417	-0.008717	0.610594
ENSG00000126602.9.vs.ENSG00000005339.11	0.00604999	-0.00397981	0.0525741
ENSG00000126698.9.vs.ENSG00000169403.10	-0.00117652	-0.0132081	0.266245
ENSG00000126698.9.vs.ENSG00000270605.1	-0.000253912	-0.130202	0.190086
ENSG00000126746.16.vs.ENSG00000139200.12	-0.0106599	-0.0311502	0.512008
ENSG00000126759.11.vs.ENSG00000126767.16	-0.0776997	0.00260933	0.444681
ENSG00000126883.15.vs.ENSG00000126878.11	0.00498434	0.00143278	0.117208
ENSG00000126953.5.vs.ENSG00000270813.2	0.0248933	1.29372	0.0964484
ENSG00000127022.13.vs.ENSG00000161021.10	3.18047e-05	-0.00357317	0.850514
ENSG00000127191.16.vs.ENSG00000213590.2	0.00587495	0.437156	0.15819
ENSG00000127337.5.vs.ENSG00000090382.5	-0.00943135	-0.000759574	0.289082
ENSG00000127364.3.vs.ENSG00000270923.1	0.0768242	-0.125781	0.904571
ENSG00000127366.5.vs.ENSG00000127364.3	-0.224813	0.148804	0.734667
ENSG00000127366.5.vs.ENSG00000270923.1	-0.255683	0.66711	0.77177
ENSG00000127412.5.vs.ENSG00000197993.6	0.772313	-0.326329	0.136501
ENSG00000127511.8.vs.ENSG00000127533.3	-0.000929808	0.0271577	0.372982
ENSG00000127540.10.vs.ENSG00000071564.13	0.00324226	0.00401059	0.0398075
ENSG00000127540.10.vs.ENSG00000071655.16	-0.00479286	0.0104008	0.00474894
ENSG00000127578.6.vs.ENSG00000102854.13	-0.0791974	0.000966729	0.243075
ENSG00000127585.10.vs.ENSG00000127580.14	-0.00210744	0.00134844	0.845034
ENSG00000127884.4.vs.ENSG00000148803.10	-0.000861212	0.0399966	0.161931
ENSG00000127957.15.vs.ENSG00000127946.15	-0.113362	-0.00256208	0.366853
ENSG00000128000.14.vs.ENSG00000269069.1	-0.0103245	-0.0137279	0.732372
ENSG00000128159.10.vs.ENSG00000273137.1	-0.0131879	0.256442	0.3775
ENSG00000128191.12.vs.ENSG00000099901.15	-0.000228184	0.00380743	0.257063
ENSG00000128218.7.vs.ENSG00000187792.4	-0.0396121	0.0113238	0.732515
ENSG00000128228.4.vs.ENSG00000100023.16	0.00772289	0.000584481	0.271121
ENSG00000128228.4.vs.ENSG00000161180.9	0.00749338	0.824573	0.132203
ENSG00000128242.11.vs.ENSG00000214491.7	-0.231447	0.0138783	0.610155
ENSG00000128272.13.vs.ENSG00000100335.11	0.000761617	0.00197681	0.479288
ENSG00000128294.14.vs.ENSG00000100122.5	-0.00835007	0.609965	0.0151626
ENSG00000128394.15.vs.ENSG00000243811.6	0.0213297	-0.0546582	0.435221
ENSG00000128422.14.vs.ENSG00000186832.7	-7.87024e-05	0.00094504	1.59661e-06
ENSG00000128564.6.vs.ENSG00000167011.7	0.013505	0.0297227	0.256839
ENSG00000128567.15.vs.ENSG00000273489.1	0.000957884	0.2946	0.169795
ENSG00000128578.8.vs.ENSG00000158467.15	-0.0246328	9.82437e-05	0.797178
ENSG00000128591.14.vs.ENSG00000128596.15	0.000176818	-0.0491632	0.713546
ENSG00000128607.12.vs.ENSG00000229196.3	0.00230063	-0.794354	0.338874
ENSG00000128610.10.vs.ENSG00000081803.14	0.128501	-0.00362262	0.42107
ENSG00000128710.5.vs.ENSG00000128709.11	-0.00936286	0.0171708	0.674993
ENSG00000128713.12.vs.ENSG00000128714.5	0.296538	-0.0611561	0.33348
ENSG00000128739.19.vs.ENSG00000279192.1	0.00340413	0.000674067	0.736055
ENSG00000128928.7.vs.ENSG00000140320.10	-0.00254714	0.0168316	0.0865868
ENSG00000128944.12.vs.ENSG00000140323.5	0.0121836	0.00910576	0.028886
ENSG00000129158.9.vs.ENSG00000129167.8	0.00359356	-0.0161813	0.550868
ENSG00000129315.8.vs.ENSG00000139620.11	0.00499074	-0.0213068	0.454867
ENSG00000129354.10.vs.ENSG00000129347.18	0.00296448	0.00128607	0.146063
ENSG00000129354.10.vs.ENSG00000129355.6	0.00332079	-0.00202241	0.152274
ENSG00000129450.7.vs.ENSG00000168995.12	0.172556	-0.350785	0.195358
ENSG00000129451.10.vs.ENSG00000186474.14	0.00144998	-0.0148695	0.331854
ENSG00000129646.12.vs.ENSG00000161542.15	0.0014075	-0.00355491	0.804677
ENSG00000129757.11.vs.ENSG00000254827.4	0.000932405	-0.0166444	0.956362
ENSG00000129911.7.vs.ENSG00000079313.10	0.0097877	0.0145481	0.0475304
ENSG00000129946.9.vs.ENSG00000181781.8	-0.00228268	0.0533369	0.812773
ENSG00000129946.9.vs.ENSG00000183186.6	-0.00210452	0.00339721	0.947592
ENSG00000129991.11.vs.ENSG00000105048.15	-0.109857	0.000413692	0.274106
ENSG00000130005.10.vs.ENSG00000280486.1	-0.000406024	-1.85462	0.691403
ENSG00000130203.8.vs.ENSG00000130208.8	0.000536819	-0.00145093	0.00498854
ENSG00000130270.15.vs.ENSG00000079313.10	-0.00952397	0.0215742	0.0713188
ENSG00000130307.10.vs.ENSG00000160113.5	0.00611611	0.00164067	0.811417
ENSG00000130377.12.vs.ENSG00000267299.1	-0.0170436	0.151996	0.994697
ENSG00000130402.10.vs.ENSG00000267892.1	0.000645571	0.0367306	0.0431559
ENSG00000130427.2.vs.ENSG00000146839.17	0.0236269	-0.363233	0.32856
ENSG00000130433.6.vs.ENSG00000142408.2	0.0100705	0.0223701	0.00880171
ENSG00000130475.13.vs.ENSG00000179913.9	-0.0206267	0.0041348	0.474696
ENSG00000130489.11.vs.ENSG00000177989.12	0.0135201	-0.00850369	0.0230994
ENSG00000130517.12.vs.ENSG00000130513.6	-0.00759016	-0.00222792	0.329076
ENSG00000130545.14.vs.ENSG00000275234.1	0.00648607	-0.00157445	0.899903
ENSG00000130561.15.vs.ENSG00000077044.8	-0.109229	-0.00027066	0.86671
ENSG00000130598.14.vs.ENSG00000149043.15	-0.161835	0.0226381	0.201487
ENSG00000130643.7.vs.ENSG00000230306.1	0.144045	0.391952	0.378506
ENSG00000130702.12.vs.ENSG00000226332.2	0.00194047	-0.0724663	0.0716502
ENSG00000130703.14.vs.ENSG00000130706.11	-0.00242079	0.00332623	0.136146
ENSG00000130717.11.vs.ENSG00000230289.1	0.017435	-1.63207	0.154712
ENSG00000130723.16.vs.ENSG00000130714.14	0.00168114	0.00697618	0.23266
ENSG00000130779.18.vs.ENSG00000139719.8	-0.000923183	0.00988516	0.77762
ENSG00000130787.12.vs.ENSG00000130783.12	0.0039139	-0.440109	0.393888
ENSG00000130812.9.vs.ENSG00000267387.1	0.483674	-1.09941	0.190259
ENSG00000130881.12.vs.ENSG00000166359.9	0.00622223	0.0616136	0.00275783
ENSG00000130943.6.vs.ENSG00000205643.9	0.0314351	0.0256466	0.604189
ENSG00000130958.10.vs.ENSG00000165244.6	-0.00753966	0.0158448	0.224253
ENSG00000130985.15.vs.ENSG00000102225.14	0.000511987	0.000510117	0.379841
ENSG00000130997.15.vs.ENSG00000123933.13	-0.0751891	0.00425128	0.151637
ENSG00000131127.12.vs.ENSG00000281016.1	-0.0482786	0.197513	0.320461
ENSG00000131183.9.vs.ENSG00000169220.16	0.550354	-0.0019681	0.583081
ENSG00000131183.9.vs.ENSG00000198055.9	0.504807	0.00221553	0.549113
ENSG00000131188.10.vs.ENSG00000198055.9	0.0509084	-0.00415576	0.000533752
ENSG00000131203.11.vs.ENSG00000188676.12	-0.00274944	-1.41128	0.404931
ENSG00000131263.11.vs.ENSG00000230673.3	0.00351991	0.647169	0.001991
ENSG00000131379.8.vs.ENSG00000154781.14	-0.152293	-0.00585124	0.909454
ENSG00000131381.11.vs.ENSG00000131368.6	-0.00292636	0.0045649	0.48538
ENSG00000131408.12.vs.ENSG00000062822.11	0.00398038	0.00588318	0.223824
ENSG00000131459.11.vs.ENSG00000050748.16	0.00355597	-0.000749901	0.793498
ENSG00000131469.11.vs.ENSG00000068079.6	0.000379526	-0.0071741	0.153262
ENSG00000131475.5.vs.ENSG00000126562.15	0.0026552	-0.00343589	0.404233
ENSG00000131591.16.vs.ENSG00000237330.2	0.0149149	-0.00768842	0.473829
ENSG00000131748.14.vs.ENSG00000141744.3	0.0006344	-0.0040806	0.758241
ENSG00000131759.16.vs.ENSG00000094804.8	-0.000363096	-0.0028329	0.531565
ENSG00000131759.16.vs.ENSG00000266208.1	-0.00067917	-0.00481505	0.687776
ENSG00000131966.12.vs.ENSG00000100567.11	0.00313268	0.00196599	0.493186
ENSG00000131969.13.vs.ENSG00000258745.1	-0.0160261	-0.850276	0.658606
ENSG00000132004.11.vs.ENSG00000095059.14	-0.00186986	0.0088354	0.0317566
ENSG00000132004.11.vs.ENSG00000105576.14	-0.00144837	0.00588408	0.0122856
ENSG00000132185.15.vs.ENSG00000162746.13	-0.02401	-0.00872104	0.472301
ENSG00000132205.9.vs.ENSG00000272625.1	0.0078698	-1.64609	0.597804
ENSG00000132326.10.vs.ENSG00000144485.9	-0.0163576	-0.000836109	0.0623812
ENSG00000132326.10.vs.ENSG00000232306.1	-0.0152879	-0.262653	0.06265
ENSG00000132388.11.vs.ENSG00000185722.15	0.00919826	-0.0101522	0.184654
ENSG00000132405.17.vs.ENSG00000173011.11	0.000451127	-0.0031094	0.883134
ENSG00000132464.10.vs.ENSG00000132467.3	0.519146	0.000415024	0.721296
ENSG00000132510.9.vs.ENSG00000182224.10	0.00701546	-0.176148	0.0613426
ENSG00000132510.9.vs.ENSG00000183914.13	0.00267257	-0.00170424	0.868884
ENSG00000132510.9.vs.ENSG00000280046.1	0.00438251	-0.162039	0.506589
ENSG00000132554.18.vs.ENSG00000156509.12	-0.00528385	-0.0626244	0.609147
ENSG00000132561.12.vs.ENSG00000243504.1	0.000756636	-1.31195	0.667705
ENSG00000132561.12.vs.ENSG00000245970.2	-0.000624838	0.0116784	0.901581
ENSG00000132563.14.vs.ENSG00000120733.12	0.00903898	-0.00385333	0.163261
ENSG00000132570.13.vs.ENSG00000113621.13	-0.016962	0.00457705	0.641215
ENSG00000132612.15.vs.ENSG00000168807.15	0.00867223	-0.00845884	0.0637137
ENSG00000132670.19.vs.ENSG00000125901.5	-0.00412238	0.00609184	0.0803947
ENSG00000132680.9.vs.ENSG00000143622.9	0.000303538	-0.00443182	0.817173
ENSG00000132688.10.vs.ENSG00000229953.1	0.00034614	0.03759	0.445495
ENSG00000132746.13.vs.ENSG00000239559.2	-0.000469281	-0.135023	0.47611
ENSG00000132881.10.vs.ENSG00000233929.1	-0.0603501	1.17803	0.144604
ENSG00000132912.11.vs.ENSG00000086589.10	0.000741517	-0.0114747	0.440797
ENSG00000132953.15.vs.ENSG00000150456.9	0.00249592	-0.00279108	0.91957
ENSG00000133055.7.vs.ENSG00000133048.11	-0.123324	-1.82845e-05	0.808164
ENSG00000133104.11.vs.ENSG00000242715.6	-0.0119273	0.136999	0.00665853
ENSG00000133138.18.vs.ENSG00000133135.12	0.011714	-0.0223024	0.222795
ENSG00000133142.16.vs.ENSG00000279894.1	-0.00124522	-0.153052	0.233635
ENSG00000133193.11.vs.ENSG00000277728.1	-0.0162708	0.0325912	0.43299
ENSG00000133243.7.vs.ENSG00000099875.13	0.00824135	-0.00121146	0.0277044
ENSG00000133250.12.vs.ENSG00000133246.10	0.0363605	-0.162925	0.0611599
ENSG00000133250.12.vs.ENSG00000142347.15	0.0213512	-0.00476825	0.404171
ENSG00000133265.9.vs.ENSG00000105063.17	0.00311227	0.00210127	0.346574
ENSG00000133393.11.vs.ENSG00000133392.15	0.00109249	0.000109051	0.976217
ENSG00000133657.13.vs.ENSG00000178732.5	0.00125569	-0.867291	0.40478
ENSG00000133706.16.vs.ENSG00000173261.7	0.0016752	0.228116	0.584991
ENSG00000133789.13.vs.ENSG00000239470.3	-0.00665589	0.340758	0.110371
ENSG00000133789.13.vs.ENSG00000246273.5	-0.00705457	0.0491995	0.0676519
ENSG00000133961.18.vs.ENSG00000258944.1	-0.00557994	-0.606635	0.47838
ENSG00000133962.6.vs.ENSG00000279286.2	0.00375797	-0.221119	0.66331
ENSG00000133983.13.vs.ENSG00000213463.4	-0.00285506	-0.00215585	0.835708
ENSG00000134058.9.vs.ENSG00000134056.10	0.00579088	-0.00076254	0.846141
ENSG00000134070.4.vs.ENSG00000157014.9	-0.0126434	-0.00351473	0.744848
ENSG00000134201.9.vs.ENSG00000134184.11	-0.00289547	-0.000674148	0.85962
ENSG00000134242.14.vs.ENSG00000188761.10	-0.0104191	0.101055	0.407849
ENSG00000134243.10.vs.ENSG00000143106.11	-0.000687459	0.0013755	0.794523
ENSG00000134245.16.vs.ENSG00000143079.13	0.0434627	0.00767383	0.0121068
ENSG00000134285.9.vs.ENSG00000134287.8	0.00537755	-0.000862158	0.291187
ENSG00000134285.9.vs.ENSG00000281789.1	0.0053912	-0.3979	0.375809
ENSG00000134287.8.vs.ENSG00000281789.1	-0.000920333	-0.461704	0.584066
ENSG00000134330.17.vs.ENSG00000239300.4	-0.00476896	0.0410475	0.860053
ENSG00000134333.12.vs.ENSG00000166796.10	0.000249821	-0.00260706	0.613699
ENSG00000134375.9.vs.ENSG00000238003.1	0.00429147	0.556975	0.13374
ENSG00000134780.8.vs.ENSG00000124920.12	-0.0549351	0.0404024	0.0130895
ENSG00000134830.5.vs.ENSG00000134815.17	-0.00848043	0.0047728	0.352186
ENSG00000134884.12.vs.ENSG00000125266.6	-0.00383748	0.00270718	0.527384
ENSG00000135040.14.vs.ENSG00000231741.2	0.0117389	0.41824	0.443028
ENSG00000135070.12.vs.ENSG00000187753.11	0.0140566	0.696965	0.106763
ENSG00000135114.11.vs.ENSG00000157895.10	-0.00012052	-0.00337532	0.988143
ENSG00000135248.14.vs.ENSG00000128595.15	0.0210811	0.000805454	0.233196
ENSG00000135249.6.vs.ENSG00000223886.3	0.011097	0.344289	0.394845
ENSG00000135249.6.vs.ENSG00000272604.1	8.29417e-07	0.116346	0.306464
ENSG00000135250.15.vs.ENSG00000272918.1	-0.00280067	0.0674573	0.382132
ENSG00000135372.7.vs.ENSG00000135387.18	0.00427095	-0.000624792	0.282961
ENSG00000135407.9.vs.ENSG00000175215.8	0.00721853	-0.00193009	0.366015
ENSG00000135436.7.vs.ENSG00000257964.1	0.308208	-0.952774	0.670378
ENSG00000135452.8.vs.ENSG00000255737.2	-0.0144418	0.0126349	0.0242253
ENSG00000135457.8.vs.ENSG00000110925.5	-0.00069005	-0.00768196	0.301302
ENSG00000135506.14.vs.ENSG00000255737.2	-0.00083982	0.00889669	0.359811
ENSG00000135605.11.vs.ENSG00000074966.9	0.0566454	-0.220645	0.510614
ENSG00000135740.15.vs.ENSG00000196155.11	-0.00706602	0.0107451	0.206531
ENSG00000135821.15.vs.ENSG00000203730.2	-0.000449916	0.333879	0.012642
ENSG00000135828.10.vs.ENSG00000143333.6	-0.0168533	-0.000433893	0.414953
ENSG00000135838.12.vs.ENSG00000135829.15	-0.00507775	1.55914e-05	0.86944
ENSG00000135925.7.vs.ENSG00000115596.3	-0.0417415	0.038402	0.0490523
ENSG00000136045.10.vs.ENSG00000240441.1	0.00765554	0.572445	0.386023
ENSG00000136114.14.vs.ENSG00000136100.11	-0.0103241	-0.00262612	0.855636
ENSG00000136147.15.vs.ENSG00000236577.1	-0.00992095	1.10992	0.419341
ENSG00000136240.8.vs.ENSG00000231359.3	0.0012945	-0.052521	0.0562412
ENSG00000136485.13.vs.ENSG00000136463.7	-0.00236468	0.0127611	0.203208
ENSG00000136485.13.vs.ENSG00000173826.13	-0.000941586	0.0143771	0.618236
ENSG00000136535.13.vs.ENSG00000271924.1	-0.174246	-2.70262	0.446302
ENSG00000136628.16.vs.ENSG00000196660.9	0.0009521	-0.143393	0.42434
ENSG00000136631.11.vs.ENSG00000023902.12	0.00724399	0.00214648	0.160525
ENSG00000136807.10.vs.ENSG00000136877.13	0.00160912	-0.0010406	0.911404
ENSG00000136811.15.vs.ENSG00000119392.13	0.00420368	-0.00324447	0.602406
ENSG00000136811.15.vs.ENSG00000228510.2	0.00355966	-0.196996	0.594622
ENSG00000136819.13.vs.ENSG00000136827.11	0.00113064	0.0102203	0.288096
ENSG00000136828.17.vs.ENSG00000136895.17	-0.00562821	-0.00236481	0.848888
ENSG00000136840.17.vs.ENSG00000160408.13	0.00807841	-0.000585909	0.292181
ENSG00000136840.17.vs.ENSG00000167103.10	0.0122631	-0.122365	0.0197111
ENSG00000136856.16.vs.ENSG00000136895.17	0.0035005	-0.00933793	0.861692
ENSG00000136877.13.vs.ENSG00000225032.4	0.000664065	0.0136205	0.963199
ENSG00000136883.11.vs.ENSG00000106927.10	-0.0031554	0.0078799	0.0405285
ENSG00000136908.16.vs.ENSG00000167103.10	0.00745476	-0.122285	0.00821128
ENSG00000136908.16.vs.ENSG00000167106.10	0.00569197	-0.00110877	0.105659
ENSG00000136982.5.vs.ENSG00000064313.10	0.0187646	-0.00252572	0.174341
ENSG00000137054.14.vs.ENSG00000234160.1	-0.0101936	0.289377	0.00165588
ENSG00000137090.10.vs.ENSG00000064218.4	-0.0947785	0.0308988	0.718566
ENSG00000137098.12.vs.ENSG00000204930.8	-0.125856	-0.0866535	0.364606
ENSG00000137135.16.vs.ENSG00000137078.7	0.0228976	-0.0536276	0.169879
ENSG00000137135.16.vs.ENSG00000198467.12	0.0184155	0.000787811	0.226111
ENSG00000137145.19.vs.ENSG00000273226.1	0.00348172	-0.00878928	0.0521257
ENSG00000137154.11.vs.ENSG00000272842.1	9.18138e-05	0.0140535	0.63399
ENSG00000137161.15.vs.ENSG00000231113.2	0.00147035	0.00763447	0.823285
ENSG00000137207.10.vs.ENSG00000271754.1	0.00125688	0.320106	0.200642
ENSG00000137275.12.vs.ENSG00000137274.11	-0.00689093	0.0123392	0.564551
ENSG00000137331.11.vs.ENSG00000201988.2	-0.00158842	-1.2304	0.261308
ENSG00000137337.13.vs.ENSG00000137404.13	-0.00347688	0.0103465	0.367236
ENSG00000137337.13.vs.ENSG00000272540.1	-0.00115542	-0.0712853	0.947644
ENSG00000137460.7.vs.ENSG00000231841.1	0.000246543	2.07966	0.560317
ENSG00000137486.15.vs.ENSG00000279117.1	-0.00547417	0.00799638	0.246867
ENSG00000137496.16.vs.ENSG00000251143.1	-0.0161707	-0.187292	0.205707
ENSG00000137504.12.vs.ENSG00000179071.4	0.0022869	0.0484534	0.135107
ENSG00000137561.4.vs.ENSG00000137563.10	-0.149331	0.00537684	0.100771
ENSG00000137709.8.vs.ENSG00000181264.7	-0.0131135	-0.0263209	0.485273
ENSG00000137709.8.vs.ENSG00000184232.7	-0.0150543	0.0124188	0.00813066
ENSG00000137752.21.vs.ENSG00000137757.9	-0.0142204	0.1161	0.365257
ENSG00000137752.21.vs.ENSG00000204397.6	-0.0186436	0.0188557	0.293619
ENSG00000137802.12.vs.ENSG00000243708.7	-0.0027067	-0.0324521	0.964404
ENSG00000137817.15.vs.ENSG00000067225.16	-0.00010373	0.00029147	0.24406
ENSG00000137825.9.vs.ENSG00000137815.13	0.0170143	-0.00214182	0.747837
ENSG00000137875.4.vs.ENSG00000069966.17	0.0927916	-0.00267604	0.568753
ENSG00000137875.4.vs.ENSG00000259712.1	0.0865788	0.415518	0.276268
ENSG00000137876.8.vs.ENSG00000279145.1	-0.00194269	0.0313666	0.838567
ENSG00000137880.5.vs.ENSG00000188277.9	0.0302692	0.0940643	0.100177
ENSG00000137959.14.vs.ENSG00000137965.9	-0.0013214	-0.000785845	0.465586
ENSG00000137965.9.vs.ENSG00000238015.2	-0.00204804	-0.731635	0.469179
ENSG00000138036.17.vs.ENSG00000152527.12	-0.0201769	-0.0117925	0.213431
ENSG00000138079.12.vs.ENSG00000226972.2	-0.134783	0.278958	0.859932
ENSG00000138271.5.vs.ENSG00000181631.6	0.0147814	-0.0801029	0.00594079
ENSG00000138279.14.vs.ENSG00000229659.1	-0.00332057	0.0867702	0.28383
ENSG00000138303.16.vs.ENSG00000107742.11	-0.00356062	-0.00398101	0.425988
ENSG00000138315.11.vs.ENSG00000156026.13	-0.011243	0.00770038	0.578236
ENSG00000138346.13.vs.ENSG00000204130.11	0.0250913	-0.00344989	0.13184
ENSG00000138378.16.vs.ENSG00000280083.1	-0.0594946	0.823925	0.212984
ENSG00000138381.8.vs.ENSG00000151687.13	0.00188486	0.0183719	0.890712
ENSG00000138468.14.vs.ENSG00000081148.11	-0.000286125	-0.014657	0.9979
ENSG00000138613.12.vs.ENSG00000166128.11	-0.0149365	-0.00564688	0.115781
ENSG00000138615.5.vs.ENSG00000166855.8	0.000174385	-0.00796923	0.516228
ENSG00000138641.14.vs.ENSG00000248019.2	-0.00684002	-0.0301055	0.514099
ENSG00000138759.16.vs.ENSG00000138772.11	0.00248401	0.00274418	0.498187
ENSG00000138778.10.vs.ENSG00000164039.13	0.00895462	-0.00387407	0.146408
ENSG00000138794.8.vs.ENSG00000123739.9	-0.00137769	0.000713113	0.980283
ENSG00000138834.11.vs.ENSG00000206053.11	0.00150735	-0.000292778	0.865464
ENSG00000139112.9.vs.ENSG00000134539.15	0.000104338	0.000683678	0.999266
ENSG00000139131.11.vs.ENSG00000276148.1	0.00837098	-0.503639	0.312534
ENSG00000139289.12.vs.ENSG00000187109.12	-0.00158024	-0.000619009	0.431614
ENSG00000139508.13.vs.ENSG00000233588.1	-0.00976695	0.285329	0.521631
ENSG00000139549.2.vs.ENSG00000139636.14	0.177246	-0.0119427	0.613791
ENSG00000139572.3.vs.ENSG00000161642.16	-0.0241708	-0.0010423	0.772628
ENSG00000139597.15.vs.ENSG00000244754.7	-0.0579423	0.00405513	0.0184513
ENSG00000139626.14.vs.ENSG00000172819.15	-0.0529324	-0.0025757	0.245777
ENSG00000139726.9.vs.ENSG00000130783.12	0.0023129	-0.381499	0.605287
ENSG00000139890.8.vs.ENSG00000197324.7	-0.141054	-0.00122921	0.0798066
ENSG00000139914.6.vs.ENSG00000092010.13	-0.0994904	-0.00337188	0.0291659
ENSG00000139998.13.vs.ENSG00000176153.11	-7.62307e-05	-0.00261687	0.976585
ENSG00000140067.6.vs.ENSG00000258987.1	-10.2111	-1.80382	0.133919
ENSG00000140307.9.vs.ENSG00000140299.10	-0.00186878	0.00102317	0.961977
ENSG00000140326.11.vs.ENSG00000128881.15	-0.00730808	0.00186771	0.919683
ENSG00000140367.10.vs.ENSG00000167196.12	-0.00194552	0.00373893	0.895398
ENSG00000140455.15.vs.ENSG00000197361.6	-0.00155839	0.0311769	0.880083
ENSG00000140545.13.vs.ENSG00000140511.10	-3.32806e-05	0.000276515	0.995117
ENSG00000140553.15.vs.ENSG00000196547.13	0.00172921	-0.000262179	0.844468
ENSG00000140575.11.vs.ENSG00000259262.1	-3.37474e-05	2.02763	0.0188129
ENSG00000140853.14.vs.ENSG00000087237.9	-0.00361937	0.089256	0.0214991
ENSG00000140854.11.vs.ENSG00000276166.1	0.0156799	0.891349	0.0648416
ENSG00000140905.8.vs.ENSG00000166473.15	0.0242114	-0.0393542	0.70696
ENSG00000140950.14.vs.ENSG00000261286.1	0.0038222	0.260643	0.00736805
ENSG00000140961.11.vs.ENSG00000103154.8	0.00165337	0.0346353	0.000325653
ENSG00000140983.12.vs.ENSG00000103269.12	-7.04364e-05	4.60178e-05	0.999659
ENSG00000140992.17.vs.ENSG00000162066.13	-0.00306713	0.00653794	0.544139
ENSG00000140995.15.vs.ENSG00000258947.5	0.00358463	0.0155886	0.0504273
ENSG00000141002.17.vs.ENSG00000204991.9	0.0041349	-0.00886645	0.330496
ENSG00000141030.11.vs.ENSG00000154803.11	-0.000716978	-0.0109645	0.64609
ENSG00000141030.11.vs.ENSG00000264187.1	-0.00353119	1.71324	0.003127
ENSG00000141068.12.vs.ENSG00000168961.15	-0.00256808	-0.00246842	0.565738
ENSG00000141096.4.vs.ENSG00000167261.12	-0.730013	-0.0575694	0.416689
ENSG00000141101.11.vs.ENSG00000260290.2	0.0108339	1.16804	0.00403206
ENSG00000141198.12.vs.ENSG00000275710.1	-0.00155508	-0.0510122	0.782991
ENSG00000141298.16.vs.ENSG00000167549.17	-0.00135473	0.00338236	0.158901
ENSG00000141391.12.vs.ENSG00000267199.1	0.0278493	0.15567	0.217838
ENSG00000141503.14.vs.ENSG00000205710.3	-0.00281264	0.00977724	0.771868
ENSG00000141574.6.vs.ENSG00000173762.6	0.000683478	-0.000480105	0.966487
ENSG00000141738.12.vs.ENSG00000141736.12	-2.24479e-05	-4.68361e-06	0.994316
ENSG00000141854.6.vs.ENSG00000228887.3	-0.00924867	0.130094	0.248299
ENSG00000141858.10.vs.ENSG00000188032.8	0.00364776	0.91659	7.15894e-05
ENSG00000141956.12.vs.ENSG00000157617.15	0.072064	0.0061819	0.00246854
ENSG00000141959.15.vs.ENSG00000184441.4	0.00333919	0.0325566	0.00100606
ENSG00000141985.8.vs.ENSG00000269318.1	0.00751335	0.228127	0.00062836
ENSG00000142002.15.vs.ENSG00000074842.6	-0.00339606	0.00359613	0.0846571
ENSG00000142188.15.vs.ENSG00000177692.10	-0.00714073	-0.075341	0.286687
ENSG00000142252.9.vs.ENSG00000104859.13	0.0112179	-0.007062	0.67066
ENSG00000142303.12.vs.ENSG00000142347.15	0.014679	-0.00579819	0.549978
ENSG00000142303.12.vs.ENSG00000279396.1	0.00527333	0.741335	0.303161
ENSG00000142319.17.vs.ENSG00000279908.1	0.0471348	-0.262767	0.571486
ENSG00000142327.10.vs.ENSG00000188542.8	0.00391335	-0.0926939	0.298872
ENSG00000142534.5.vs.ENSG00000142541.15	4.64039e-06	-5.23603e-05	0.919707
ENSG00000142556.17.vs.ENSG00000197619.12	0.0282323	-0.0525077	0.179695
ENSG00000142556.17.vs.ENSG00000256087.5	-0.000492563	-0.0240951	0.440755
ENSG00000142609.16.vs.ENSG00000178821.11	0.0136504	0.00104109	0.968104
ENSG00000142609.16.vs.ENSG00000233542.1	0.0100057	0.689795	0.268213
ENSG00000142623.9.vs.ENSG00000142619.4	-0.11515	0.0139032	0.00746751
ENSG00000142675.16.vs.ENSG00000142684.7	-0.0198461	0.0643865	0.00840722
ENSG00000142677.3.vs.ENSG00000142661.17	-0.00462615	0.0526944	0.43211
ENSG00000142684.7.vs.ENSG00000197245.4	0.0420188	-0.052871	0.0669987
ENSG00000142748.11.vs.ENSG00000142733.13	0.104264	0.00135424	0.407271
ENSG00000142748.11.vs.ENSG00000174950.9	0.102782	0.036325	0.274799
ENSG00000142959.4.vs.ENSG00000234093.3	0.256677	0.317597	0.0252162
ENSG00000143061.16.vs.ENSG00000116815.14	-0.00221088	0.0135331	0.483844
ENSG00000143093.13.vs.ENSG00000168710.16	0.00521203	-0.00223047	0.350411
ENSG00000143093.13.vs.ENSG00000258673.1	-0.00884955	1.13044	0.278188
ENSG00000143199.16.vs.ENSG00000143158.9	-0.104697	0.000212199	0.691053
ENSG00000143217.8.vs.ENSG00000186517.12	0.0029393	-0.00704985	0.0491942
ENSG00000143224.16.vs.ENSG00000143222.10	-0.00741739	0.0018082	0.59813
ENSG00000143315.6.vs.ENSG00000177807.6	0.00229178	-0.0912863	0.414286
ENSG00000143318.11.vs.ENSG00000132681.15	0.152058	-0.0756491	0.0165238
ENSG00000143318.11.vs.ENSG00000162734.11	-0.0097038	-2.80316e-06	0.924905
ENSG00000143320.7.vs.ENSG00000223356.1	-3.7845e-05	0.844286	0.164066
ENSG00000143367.14.vs.ENSG00000143375.13	0.00103781	-0.00125286	0.746214
ENSG00000143368.9.vs.ENSG00000159164.8	0.00244792	-0.0122783	0.22929
ENSG00000143379.11.vs.ENSG00000231073.1	0.00213107	0.606537	0.558493
ENSG00000143384.11.vs.ENSG00000274963.1	0.00057464	0.0335645	0.387776
ENSG00000143384.11.vs.ENSG00000277452.1	0.000575569	0.0297073	0.390823
ENSG00000143398.18.vs.ENSG00000159352.14	-0.0013528	0.0020762	0.0332011
ENSG00000143412.8.vs.ENSG00000231073.1	-0.00376837	0.903941	0.273043
ENSG00000143437.19.vs.ENSG00000143387.11	0.00126055	0.000106813	0.856769
ENSG00000143437.19.vs.ENSG00000224800.1	0.000702554	1.15665	0.784262
ENSG00000143452.14.vs.ENSG00000163131.9	0.0117676	-0.00187123	0.0479206
ENSG00000143545.7.vs.ENSG00000143552.8	0.00234808	-0.0674107	0.324898
ENSG00000143549.18.vs.ENSG00000163263.6	0.000191094	-0.160961	0.716802
ENSG00000143614.7.vs.ENSG00000198837.8	0.00304193	0.00214907	0.54578
ENSG00000143653.9.vs.ENSG00000260855.1	-0.00322697	-0.0629548	0.0645988
ENSG00000143793.11.vs.ENSG00000162910.17	0.00518296	-6.45521e-05	0.644293
ENSG00000143793.11.vs.ENSG00000224566.2	0.00504683	-0.0576721	0.641708
ENSG00000143811.15.vs.ENSG00000243709.1	0.00322118	-0.00218413	0.219999
ENSG00000143845.13.vs.ENSG00000143839.13	-0.00442871	0.0885691	0.270681
ENSG00000143847.14.vs.ENSG00000163444.10	-0.00190233	0.00139177	0.959117
ENSG00000143862.6.vs.ENSG00000143851.14	0.000760677	-0.0181425	0.276995
ENSG00000143952.18.vs.ENSG00000251775.1	0.00679958	0.31114	0.385923
ENSG00000143977.12.vs.ENSG00000035141.6	-0.00288285	0.00920718	0.0967552
ENSG00000144028.13.vs.ENSG00000230747.1	0.000418554	0.512866	0.415118
ENSG00000144045.12.vs.ENSG00000115289.11	-0.023162	0.0254721	0.248198
ENSG00000144045.12.vs.ENSG00000115318.10	-0.0199945	0.0128773	0.643164
ENSG00000144061.11.vs.ENSG00000144063.3	-0.0849332	0.0323753	0.00479449
ENSG00000144061.11.vs.ENSG00000175701.9	-0.0989568	0.0246663	0.00138004
ENSG00000144230.15.vs.ENSG00000169994.17	0.101103	0.0368128	0.105208
ENSG00000144488.13.vs.ENSG00000168427.8	0.0069102	0.120332	0.0660234
ENSG00000144550.11.vs.ENSG00000163719.17	-0.328228	-0.00179439	0.681149
ENSG00000144579.6.vs.ENSG00000018280.15	-0.00267191	0.00298198	0.556511
ENSG00000144671.9.vs.ENSG00000172940.10	-0.0121345	-0.184123	0.954185
ENSG00000144713.11.vs.ENSG00000272263.1	8.21363e-05	-0.211264	0.905444
ENSG00000144744.15.vs.ENSG00000144747.13	-0.00213409	-0.00690223	0.187231
ENSG00000144791.8.vs.ENSG00000011376.8	0.00592472	-0.0228763	0.307214
ENSG00000144815.13.vs.ENSG00000182504.9	-0.00158726	0.00625886	0.857412
ENSG00000144827.7.vs.ENSG00000144824.18	0.00415424	0.00392419	0.237548
ENSG00000144827.7.vs.ENSG00000144834.11	0.00161346	0.0396177	1.50776e-09
ENSG00000144867.10.vs.ENSG00000091513.13	0.00598639	0.00010671	0.0238122
ENSG00000144868.12.vs.ENSG00000170819.4	-0.00868295	-0.0658219	0.683384
ENSG00000144893.11.vs.ENSG00000239265.4	-0.00824554	-0.736103	0.324793
ENSG00000145050.14.vs.ENSG00000259956.1	0.00278442	-0.00250315	0.596272
ENSG00000145107.14.vs.ENSG00000163960.10	0.00262976	0.00514878	0.267193
ENSG00000145569.5.vs.ENSG00000248791.1	-0.01016	0.268337	0.515937
ENSG00000145685.12.vs.ENSG00000113273.14	0.00196773	0.0057684	0.507954
ENSG00000145730.19.vs.ENSG00000175749.11	0.000357652	-0.575665	0.770882
ENSG00000145757.14.vs.ENSG00000250240.4	0.216176	1.03268	0.131268
ENSG00000145833.14.vs.ENSG00000164615.4	-0.00745465	0.00161914	0.214376
ENSG00000145861.7.vs.ENSG00000135083.13	0.0675154	-0.0229685	0.0959715
ENSG00000145911.5.vs.ENSG00000145916.17	0.00718387	-0.00973587	0.0736875
ENSG00000146001.5.vs.ENSG00000120327.6	0.086946	0.0237114	0.0473992
ENSG00000146001.5.vs.ENSG00000262096.2	0.132148	0.317582	0.101681
ENSG00000146112.10.vs.ENSG00000204560.8	0.00255419	-0.000263717	0.556603
ENSG00000146221.9.vs.ENSG00000124608.4	-0.0725504	0.00628791	0.761825
ENSG00000146285.12.vs.ENSG00000280135.1	-0.106134	0.154358	0.532256
ENSG00000146409.9.vs.ENSG00000112303.12	-0.0024818	0.00359685	0.962969
ENSG00000146410.10.vs.ENSG00000029363.14	0.0414532	-0.00146027	0.249124
ENSG00000146410.10.vs.ENSG00000237596.5	0.0374203	0.0148068	0.289039
ENSG00000146416.15.vs.ENSG00000217648.1	-0.0120879	0.32334	0.096585
ENSG00000146426.16.vs.ENSG00000171217.5	0.00631498	0.0052688	0.855216
ENSG00000146576.11.vs.ENSG00000236609.3	0.0220356	-0.0281495	0.0244612
ENSG00000146729.8.vs.ENSG00000178665.13	-0.00741558	0.0177412	0.35838
ENSG00000146859.6.vs.ENSG00000272941.1	0.0233374	-0.93752	0.0954458
ENSG00000146872.16.vs.ENSG00000087995.14	-0.00972932	0.0159642	0.588788
ENSG00000146918.18.vs.ENSG00000224324.1	0.00405499	1.14678	0.179345
ENSG00000147036.10.vs.ENSG00000047597.5	0.0994806	0.0233386	0.0437532
ENSG00000147099.18.vs.ENSG00000067177.13	0.00727885	0.00352302	0.694474
ENSG00000147162.12.vs.ENSG00000147174.10	-0.000584558	0.00777933	0.950299
ENSG00000147439.10.vs.ENSG00000253200.1	-0.0489767	0.158293	0.132351
ENSG00000147457.12.vs.ENSG00000104679.9	0.00328069	0.000895572	0.709512
ENSG00000147471.10.vs.ENSG00000020181.16	-0.000208792	0.00421913	0.615531
ENSG00000147586.8.vs.ENSG00000076554.14	0.0195077	-0.000363339	0.492758
ENSG00000147601.12.vs.ENSG00000253636.1	0.0116922	-0.0209311	0.211925
ENSG00000147604.12.vs.ENSG00000250295.5	0.000287397	0.0349894	0.0307961
ENSG00000147650.10.vs.ENSG00000279138.1	0.00601884	-0.0313511	0.746664
ENSG00000147654.13.vs.ENSG00000205038.10	0.000839627	-0.0990527	0.758818
ENSG00000147669.9.vs.ENSG00000104450.11	0.005053	-0.015614	0.148706
ENSG00000147804.8.vs.ENSG00000160948.12	0.00468036	0.00113236	0.0288459
ENSG00000147872.8.vs.ENSG00000147874.9	0.00134714	0.00816378	0.181412
ENSG00000147912.11.vs.ENSG00000175768.11	0.012151	0.0104633	0.290879
ENSG00000147996.15.vs.ENSG00000184659.5	-0.0210824	0.60653	0.577815
ENSG00000148180.15.vs.ENSG00000243738.3	-4.61058e-05	-0.096216	0.950972
ENSG00000148200.15.vs.ENSG00000136931.8	-0.036778	-0.73957	0.279819
ENSG00000148225.14.vs.ENSG00000165188.12	-0.0242741	-0.0513364	0.0368795
ENSG00000148308.16.vs.ENSG00000196205.8	0.00561256	-0.000993618	0.078243
ENSG00000148335.13.vs.ENSG00000234789.1	0.0306907	0.284048	0.0113804
ENSG00000148346.10.vs.ENSG00000171159.4	-2.29218e-05	0.00494265	0.341423
ENSG00000148362.9.vs.ENSG00000107317.10	0.00414019	0.00125015	4.35657e-05
ENSG00000148362.9.vs.ENSG00000214402.6	0.00445119	0.220501	0.109297
ENSG00000148399.10.vs.ENSG00000165724.5	-0.0177719	0.0246882	0.0105065
ENSG00000148483.8.vs.ENSG00000260314.2	0.372569	-0.00710994	0.551833
ENSG00000148484.16.vs.ENSG00000107611.13	0.00246225	0.012008	0.149618
ENSG00000148730.6.vs.ENSG00000280401.1	-0.000947648	0.340742	0.623297
ENSG00000148832.13.vs.ENSG00000148824.17	-0.0577632	0.00911788	0.367971
ENSG00000148948.6.vs.ENSG00000279675.1	-0.00365567	9.44741e-05	0.956279
ENSG00000148965.7.vs.ENSG00000134339.7	-0.186587	-0.00116587	0.507254
ENSG00000149196.14.vs.ENSG00000255222.1	0.0162088	0.763386	0.245784
ENSG00000149243.14.vs.ENSG00000158555.13	-0.0282843	0.00498293	0.262869
ENSG00000149260.13.vs.ENSG00000137474.18	-0.000233757	0.000492201	0.997737
ENSG00000149262.15.vs.ENSG00000241782.1	0.00032014	-0.59999	0.699436
ENSG00000149262.15.vs.ENSG00000254459.1	-0.000910782	-0.377486	0.884723
ENSG00000149262.15.vs.ENSG00000255449.1	-0.00211739	0.050937	0.908734
ENSG00000149300.8.vs.ENSG00000170276.5	0.0289007	0.0379024	0.803109
ENSG00000149480.5.vs.ENSG00000149016.14	0.00303748	-0.00716073	0.587181
ENSG00000149541.8.vs.ENSG00000089597.15	0.00612303	0.000398186	0.189427
ENSG00000149541.8.vs.ENSG00000149499.10	0.00823584	-0.00496311	0.189026
ENSG00000149564.10.vs.ENSG00000255045.1	0.00760421	-1.87365	0.285015
ENSG00000149575.5.vs.ENSG00000177098.7	-0.287151	0.0184923	0.0542894
ENSG00000149577.14.vs.ENSG00000280143.1	-0.00215901	-0.0360143	0.4117
ENSG00000149591.15.vs.ENSG00000149577.14	5.18636e-06	-0.00285688	0.811629
ENSG00000149634.4.vs.ENSG00000271984.1	0.322457	-0.747206	0.583449
ENSG00000149639.13.vs.ENSG00000149636.14	-0.000467423	0.00073192	0.96123
ENSG00000149646.11.vs.ENSG00000025293.14	-0.189791	-0.00566069	0.294019
ENSG00000149782.10.vs.ENSG00000173486.11	0.00775188	-0.000104753	0.0975577
ENSG00000149798.4.vs.ENSG00000014138.7	0.00858648	0.00533744	0.418927
ENSG00000150281.6.vs.ENSG00000260083.1	-0.0509103	0.0882487	0.0766383
ENSG00000150768.14.vs.ENSG00000150764.12	0.00539507	-0.00871348	0.242526
ENSG00000150783.8.vs.ENSG00000197580.10	2.2773	-0.236722	0.0384642
ENSG00000150787.6.vs.ENSG00000197580.10	0.0159219	-0.184016	0.192333
ENSG00000151117.7.vs.ENSG00000254966.1	-0.00370344	0.278418	0.00885666
ENSG00000151376.15.vs.ENSG00000278989.1	-0.0160758	0.138264	0.688148
ENSG00000151651.14.vs.ENSG00000130640.12	-0.0009153	0.00111952	0.9669
ENSG00000152253.7.vs.ENSG00000073734.8	0.0132395	-0.120374	0.719861
ENSG00000152443.11.vs.ENSG00000264453.1	-0.0114004	0.476482	0.43371
ENSG00000152454.3.vs.ENSG00000196724.11	0.00883985	-0.0211571	0.79596
ENSG00000152454.3.vs.ENSG00000243234.1	-0.0123307	0.349971	0.926993
ENSG00000152467.8.vs.ENSG00000176293.18	-0.13516	0.0138171	0.379933
ENSG00000152556.14.vs.ENSG00000274124.1	0.0007338	-1.60896	0.736421
ENSG00000152595.15.vs.ENSG00000029559.6	-0.099442	0.0155006	0.458439
ENSG00000152672.6.vs.ENSG00000116031.8	-0.198728	-0.0083849	0.175466
ENSG00000153002.10.vs.ENSG00000163751.3	1.49231e-05	-0.013635	0.0889172
ENSG00000153046.16.vs.ENSG00000217385.1	0.00237182	-1.61395	0.529034
ENSG00000153093.17.vs.ENSG00000153094.20	0.0376765	-0.00609246	0.443303
ENSG00000153113.22.vs.ENSG00000248734.2	-0.00136863	-0.062943	0.468392
ENSG00000153208.15.vs.ENSG00000236307.2	0.00142908	1.30273	0.0620315
ENSG00000153283.11.vs.ENSG00000240891.5	-0.0153769	0.0326147	0.19325
ENSG00000153363.11.vs.ENSG00000082512.13	-0.004859	-0.00458922	0.482076
ENSG00000153790.10.vs.ENSG00000172115.7	-0.0508929	0.0010041	0.482557
ENSG00000153982.9.vs.ENSG00000167447.11	0.00605277	-0.00779032	0.634438
ENSG00000154025.14.vs.ENSG00000279825.1	-0.345147	-0.661132	0.517583
ENSG00000154059.8.vs.ENSG00000134489.6	-0.0112549	-0.631325	0.0618509
ENSG00000154079.5.vs.ENSG00000082269.15	0.0331908	0.0283146	0.00167135
ENSG00000154252.11.vs.ENSG00000180902.15	0.01671	-0.00348914	0.832911
ENSG00000154262.11.vs.ENSG00000154263.16	0.013125	-0.0767164	0.508714
ENSG00000154274.13.vs.ENSG00000174145.7	-0.0158396	0.0598244	0.301892
ENSG00000154316.13.vs.ENSG00000177710.5	0.37869	-3.84343	0.107823
ENSG00000154328.14.vs.ENSG00000079459.11	0.00613317	-0.00208506	0.610268
ENSG00000154328.14.vs.ENSG00000136574.16	-0.00182471	0.00659291	0.903074
ENSG00000154328.14.vs.ENSG00000227203.3	0.00115221	-0.690257	0.848489
ENSG00000154473.16.vs.ENSG00000188816.3	-0.00124637	0.024002	0.742504
ENSG00000154589.5.vs.ENSG00000253833.1	0.0380457	0.969076	0.194401
ENSG00000154719.12.vs.ENSG00000260583.1	0.0233934	-0.215145	0.0312511
ENSG00000154760.12.vs.ENSG00000172123.11	0.00112227	-0.0410163	0.409342
ENSG00000155066.14.vs.ENSG00000115041.11	0.000512228	0.0204445	4.54868e-05
ENSG00000155070.8.vs.ENSG00000205897.5	0.866264	0.355497	0.0726747
ENSG00000155307.16.vs.ENSG00000243440.5	-0.0144785	0.0696545	0.686938
ENSG00000155366.15.vs.ENSG00000225075.1	0.000467217	-1.72424	0.352304
ENSG00000155495.8.vs.ENSG00000165509.12	0.0182188	-0.886475	0.000812153
ENSG00000155506.15.vs.ENSG00000277039.1	0.00149765	-1.28025	0.443717
ENSG00000155542.10.vs.ENSG00000271828.1	-0.0452362	0.00213454	0.406857
ENSG00000155640.6.vs.ENSG00000231025.1	-0.0110642	-0.0292243	0.443234
ENSG00000155754.13.vs.ENSG00000155755.17	0.0510048	0.00219728	0.800324
ENSG00000156253.5.vs.ENSG00000176054.6	0.0157878	0.171112	0.206588
ENSG00000156304.13.vs.ENSG00000273271.1	0.0100352	-0.0995068	0.229591
ENSG00000156413.12.vs.ENSG00000171124.11	-0.0173279	0.00719437	0.541265
ENSG00000156486.7.vs.ENSG00000272321.1	-1.51758	2.65147	0.0399908
ENSG00000156502.12.vs.ENSG00000122958.13	-0.00092819	0.00717687	0.108124
ENSG00000156515.20.vs.ENSG00000156510.12	-0.00294961	-0.0250223	0.183524
ENSG00000156521.12.vs.ENSG00000042286.13	-7.23748e-05	-0.00191144	0.936579
ENSG00000156587.14.vs.ENSG00000240371.1	-0.0040528	0.610926	0.0412131
ENSG00000156860.14.vs.ENSG00000156858.10	-0.00301644	0.00376132	0.812979
ENSG00000156973.12.vs.ENSG00000237641.1	-0.0115455	-1.10905	0.487366
ENSG00000156983.14.vs.ENSG00000114026.20	0.00373009	-0.00236064	0.9437
ENSG00000156983.14.vs.ENSG00000144550.11	0.00343518	-0.337411	0.648951
ENSG00000157014.9.vs.ENSG00000231177.4	-0.00269312	-0.161385	0.697359
ENSG00000157014.9.vs.ENSG00000240288.6	-0.00226253	-0.207756	0.645676
ENSG00000157020.16.vs.ENSG00000157087.15	0.0017983	0.00637085	0.299919
ENSG00000157077.13.vs.ENSG00000272100.1	-0.00342746	-1.51135	0.456169
ENSG00000157214.12.vs.ENSG00000105792.18	-0.00358856	-0.0716115	0.00285459
ENSG00000157306.13.vs.ENSG00000129460.14	-0.176321	-0.0166086	0.202607
ENSG00000157315.4.vs.ENSG00000132604.9	0.903756	0.00121423	0.0725134
ENSG00000157322.15.vs.ENSG00000198373.11	0.0767906	-0.00154473	0.879368
ENSG00000157399.13.vs.ENSG00000006756.14	0.0150779	-0.0023503	0.367143
ENSG00000157510.12.vs.ENSG00000164284.13	-0.00179697	0.0124135	0.566654
ENSG00000157856.9.vs.ENSG00000138018.16	-0.0442174	0.00311404	0.402476
ENSG00000157873.16.vs.ENSG00000225931.3	-0.00818231	0.129041	0.253828
ENSG00000157881.12.vs.ENSG00000197921.5	-0.0220361	0.72628	0.000111419
ENSG00000157992.11.vs.ENSG00000235267.1	0.00571672	0.381879	0.303579
ENSG00000158014.13.vs.ENSG00000158022.6	-0.0726423	-0.670649	0.0751544
ENSG00000158042.8.vs.ENSG00000241678.1	0.00178202	-4.79815	0.186967
ENSG00000158050.4.vs.ENSG00000188886.3	0.00445854	-0.386041	0.375792
ENSG00000158158.10.vs.ENSG00000168763.14	-0.00488274	0.0023827	0.541416
ENSG00000158161.14.vs.ENSG00000228589.3	-0.00303706	-0.318826	0.314057
ENSG00000158163.13.vs.ENSG00000118017.3	-0.00522009	0.708397	0.87269
ENSG00000158315.9.vs.ENSG00000274944.3	0.0127438	0.117926	0.727652
ENSG00000158373.8.vs.ENSG00000168298.5	-0.00323079	0.00396923	0.372328
ENSG00000158417.9.vs.ENSG00000273306.1	0.000686446	-0.391701	0.599756
ENSG00000158428.3.vs.ENSG00000230580.1	-0.0566701	0.0518118	0.876891
ENSG00000158516.10.vs.ENSG00000128510.9	0.2779	0.0043142	3.29761e-06
ENSG00000158552.11.vs.ENSG00000144567.9	0.0118525	-0.00305881	0.131145
ENSG00000158604.13.vs.ENSG00000136271.9	-0.000243694	0.00575167	0.332209
ENSG00000158623.13.vs.ENSG00000270823.1	-0.00219165	-1.67011	0.416465
ENSG00000158710.13.vs.ENSG00000085552.15	0.000444007	-0.00144573	0.0285791
ENSG00000158747.12.vs.ENSG00000158748.3	0.00248918	0.162725	0.0109462
ENSG00000158806.12.vs.ENSG00000158815.9	0.0721364	0.273979	0.305346
ENSG00000158859.9.vs.ENSG00000158850.13	0.00166369	0.00180794	0.289479
ENSG00000158863.20.vs.ENSG00000158856.16	-0.000366888	0.00350083	0.872959
ENSG00000158869.9.vs.ENSG00000158882.11	-0.00328794	0.00952398	0.42908
ENSG00000158941.15.vs.ENSG00000120913.22	-0.0022037	0.0145061	0.221149
ENSG00000159079.17.vs.ENSG00000242220.5	0.00228281	0.159672	0.397656
ENSG00000159173.17.vs.ENSG00000159166.12	-0.00475991	0.00171946	0.119274
ENSG00000159189.10.vs.ENSG00000173372.15	-0.00335794	0.00341475	0.272386
ENSG00000159199.12.vs.ENSG00000270781.1	-0.00168833	1.61696	0.239537
ENSG00000159208.14.vs.ENSG00000266472.4	0.00204164	0.00425444	0.00298869
ENSG00000159231.5.vs.ENSG00000226054.2	-0.0149491	0.268915	0.0127694
ENSG00000159314.10.vs.ENSG00000225190.7	0.0108443	0.00343793	0.29992
ENSG00000159346.11.vs.ENSG00000159348.11	0.000468043	-0.00215018	0.61354
ENSG00000159374.16.vs.ENSG00000115318.10	-0.0183493	0.0143764	0.644108
ENSG00000159433.10.vs.ENSG00000260490.2	-0.00404359	1.19055	0.462343
ENSG00000159433.10.vs.ENSG00000274403.1	-0.00481363	-0.035183	0.953907
ENSG00000159459.10.vs.ENSG00000205871.5	0.00297282	0.197677	0.149339
ENSG00000159461.13.vs.ENSG00000272372.1	-0.00115382	0.671754	0.131743
ENSG00000159593.13.vs.ENSG00000249961.8	0.00478174	-0.172329	0.608944
ENSG00000159625.13.vs.ENSG00000140854.11	-0.215578	0.0210277	0.064375
ENSG00000159625.13.vs.ENSG00000182885.15	-0.0923852	-0.316874	0.244019
ENSG00000159640.13.vs.ENSG00000228979.4	0.00499935	1.67458	0.123106
ENSG00000159792.8.vs.ENSG00000038358.13	0.0253561	-0.0185369	0.0073733
ENSG00000159958.4.vs.ENSG00000234965.2	-0.00941626	-0.168511	0.717233
ENSG00000160051.10.vs.ENSG00000084652.14	-0.159155	0.00866453	0.00226959
ENSG00000160087.19.vs.ENSG00000184163.3	0.0059907	-0.00870595	0.483361
ENSG00000160094.13.vs.ENSG00000225313.4	0.000127266	0.0258416	0.607501
ENSG00000160117.13.vs.ENSG00000130312.5	0.0240566	0.00620601	0.301114
ENSG00000160182.2.vs.ENSG00000160183.12	-0.000325317	1.04562e-05	0.524211
ENSG00000160224.15.vs.ENSG00000141959.15	0.313323	0.00349238	0.00118137
ENSG00000160271.13.vs.ENSG00000148288.10	0.00410494	0.0532066	9.44668e-06
ENSG00000160318.5.vs.ENSG00000105374.8	0.168157	-0.0230732	0.143162
ENSG00000160345.11.vs.ENSG00000226706.1	-0.0374871	0.48118	0.088546
ENSG00000160408.13.vs.ENSG00000106992.16	-0.00232367	0.0353503	0.0757048
ENSG00000160471.11.vs.ENSG00000095752.5	-0.105581	0.0724798	0.102501
ENSG00000160588.8.vs.ENSG00000160593.16	0.011817	-0.0143386	0.136152
ENSG00000160633.11.vs.ENSG00000130255.11	0.00738686	-0.000193251	0.232384
ENSG00000160654.8.vs.ENSG00000110344.8	-0.0211853	-0.0014282	0.551654
ENSG00000160688.17.vs.ENSG00000160685.12	0.0027454	0.00164676	0.245706
ENSG00000160688.17.vs.ENSG00000264349.1	0.00431411	-4.19017	0.0740003
ENSG00000160703.14.vs.ENSG00000172367.14	0.0239922	-2.78922	0.0431773
ENSG00000160746.11.vs.ENSG00000234617.1	0.00766352	0.914016	0.0707611
ENSG00000160746.11.vs.ENSG00000271941.1	0.00734521	0.220157	0.178393
ENSG00000160766.13.vs.ENSG00000177628.14	-0.0136657	0.00315923	0.442938
ENSG00000160767.19.vs.ENSG00000177628.14	0.00212817	0.00202378	0.390246
ENSG00000160791.13.vs.ENSG00000121807.5	-0.0287423	0.0210457	0.145745
ENSG00000160799.10.vs.ENSG00000273682.1	0.00118986	-1.60334	0.557639
ENSG00000160870.11.vs.ENSG00000106258.12	-0.810738	0.0194299	0.472767
ENSG00000160991.14.vs.ENSG00000128563.12	-0.00353049	-0.00106743	0.719215
ENSG00000161031.11.vs.ENSG00000105122.11	-0.0156518	-0.0187774	0.104814
ENSG00000161180.9.vs.ENSG00000185651.13	0.906516	0.00411094	0.131483
ENSG00000161202.16.vs.ENSG00000161203.12	-0.00295261	0.00183155	0.0637224
ENSG00000161202.16.vs.ENSG00000228205.1	0.00150595	-0.0398696	0.77173
ENSG00000161203.12.vs.ENSG00000161204.10	0.00254486	-0.0128294	0.0163331
ENSG00000161249.19.vs.ENSG00000188508.9	0.000297652	-0.000439384	0.889179
ENSG00000161249.19.vs.ENSG00000189001.9	-0.00174503	0.00280392	0.318186
ENSG00000161267.10.vs.ENSG00000213519.2	-0.00414919	-1.92343	0.268242
ENSG00000161281.9.vs.ENSG00000270760.1	-0.000438893	0.06949	0.995367
ENSG00000161513.10.vs.ENSG00000172782.10	-0.00160933	-0.0942873	0.816444
ENSG00000161634.10.vs.ENSG00000135413.7	-0.000103789	-0.000661921	0.945824
ENSG00000161642.16.vs.ENSG00000161638.9	-0.00110374	0.00260653	0.0447745
ENSG00000161654.8.vs.ENSG00000221044.2	0.0040016	-1.24488	0.758518
ENSG00000161664.5.vs.ENSG00000125319.13	0.0181586	0.0214783	0.620118
ENSG00000161677.10.vs.ENSG00000131409.11	0.0118798	-0.270469	0.0236623
ENSG00000161798.6.vs.ENSG00000086159.11	-0.000922105	-0.00107241	0.890062
ENSG00000161798.6.vs.ENSG00000167580.6	-0.0012092	0.054207	0.821008
ENSG00000161835.9.vs.ENSG00000123358.18	0.0102941	-0.000594192	0.84401
ENSG00000161835.9.vs.ENSG00000135503.11	-0.000765854	-0.00793329	0.186258
ENSG00000161860.7.vs.ENSG00000179115.9	-0.120176	0.0106295	0.00502053
ENSG00000161888.10.vs.ENSG00000197256.9	0.0194046	0.00184738	0.0942275
ENSG00000161896.9.vs.ENSG00000137288.8	0.0150904	-0.00272381	0.706409
ENSG00000161912.16.vs.ENSG00000001167.13	0.00777526	0.000565671	0.637965
ENSG00000161920.8.vs.ENSG00000141480.16	0.00307551	0.00206437	0.927555
ENSG00000161956.11.vs.ENSG00000129226.12	0.0202303	0.0296207	0.151618
ENSG00000161956.11.vs.ENSG00000239697.9	0.0199528	-0.000484416	0.214986
ENSG00000161999.10.vs.ENSG00000127585.10	-0.00351895	-0.000412213	0.658574
ENSG00000162032.14.vs.ENSG00000103024.6	0.0711453	-0.000773879	0.80039
ENSG00000162065.10.vs.ENSG00000185883.9	0.0010722	0.0025157	0.805534
ENSG00000162066.13.vs.ENSG00000279520.1	0.0067364	-0.225668	0.388496
ENSG00000162194.11.vs.ENSG00000162191.12	0.00361023	-0.000382925	0.990691
ENSG00000162194.11.vs.ENSG00000185085.2	-0.00513148	0.00705904	0.692598
ENSG00000162399.6.vs.ENSG00000143001.4	0.427051	-0.0409504	0.626743
ENSG00000162458.11.vs.ENSG00000224321.1	0.00349321	-1.80487	0.150359
ENSG00000162460.6.vs.ENSG00000162458.11	0.091869	0.0031395	0.0469051
ENSG00000162482.4.vs.ENSG00000211454.12	0.00504882	-0.125457	0.116671
ENSG00000162511.7.vs.ENSG00000162510.5	-0.000475059	-0.153387	0.747653
ENSG00000162571.12.vs.ENSG00000198976.1	-0.294786	0.279917	0.613068
ENSG00000162571.12.vs.ENSG00000207607.2	-0.377196	1.23435	0.172992
ENSG00000162571.12.vs.ENSG00000207730.2	-0.309089	0.97641	0.446858
ENSG00000162576.15.vs.ENSG00000107404.16	0.000800519	0.00356617	0.0247796
ENSG00000162592.7.vs.ENSG00000235169.6	0.843185	-0.0209338	0.512187
ENSG00000162614.17.vs.ENSG00000180488.13	0.00675919	0.00161888	0.817337
ENSG00000162645.11.vs.ENSG00000234518.2	-0.00391749	0.0679212	0.191661
ENSG00000162650.14.vs.ENSG00000143028.8	0.0245509	0.128439	0.248333
ENSG00000162650.14.vs.ENSG00000174151.13	0.0180313	0.014321	0.206576
ENSG00000162723.8.vs.ENSG00000085552.15	-0.353698	0.00300129	0.159535
ENSG00000162733.15.vs.ENSG00000132196.12	-0.000649246	-0.0295376	0.18787
ENSG00000162735.17.vs.ENSG00000224261.2	-0.00454885	0.39692	0.187544
ENSG00000162757.4.vs.ENSG00000117595.9	0.0156504	-0.000651497	0.124592
ENSG00000162779.19.vs.ENSG00000057252.11	-0.212995	-0.00320693	0.545751
ENSG00000162782.14.vs.ENSG00000227141.2	-0.00494204	-0.258365	0.16645
ENSG00000162881.6.vs.ENSG00000162882.13	0.0364899	-0.0132784	0.802444
ENSG00000162882.13.vs.ENSG00000226491.1	0.00165172	-0.318099	0.632186
ENSG00000162892.14.vs.ENSG00000226945.1	-0.0397249	0.0297542	0.443281
ENSG00000162892.14.vs.ENSG00000271680.1	-0.0453798	0.661545	0.314394
ENSG00000162896.5.vs.ENSG00000162894.10	0.000210165	-0.0134547	0.306322
ENSG00000162910.17.vs.ENSG00000224566.2	0.00248663	-0.0428286	0.684763
ENSG00000162927.12.vs.ENSG00000232713.2	0.0345698	-0.480683	0.0512934
ENSG00000162927.12.vs.ENSG00000237522.1	0.0390931	-0.274733	0.0513963
ENSG00000163009.7.vs.ENSG00000171848.12	0.0182011	0.00209582	0.245322
ENSG00000163013.10.vs.ENSG00000135625.7	0.011109	0.0269177	0.414159
ENSG00000163017.12.vs.ENSG00000114956.18	-0.000115718	0.00492178	0.627524
ENSG00000163050.15.vs.ENSG00000143801.15	0.00480104	-0.0253148	0.00538121
ENSG00000163069.11.vs.ENSG00000188993.3	0.00358235	-0.00985202	0.679593
ENSG00000163125.14.vs.ENSG00000117360.11	0.000541684	0.00342753	0.418545
ENSG00000163159.10.vs.ENSG00000163155.10	0.0037671	0.0122754	0.0586942
ENSG00000163352.5.vs.ENSG00000160685.12	0.489629	0.00192767	0.332193
ENSG00000163382.10.vs.ENSG00000187862.10	0.000679983	-0.415588	0.37309
ENSG00000163382.10.vs.ENSG00000280316.1	0.00158327	-0.59776	0.465037
ENSG00000163435.14.vs.ENSG00000176393.9	-0.00218052	0.00262361	0.0638514
ENSG00000163449.9.vs.ENSG00000079246.14	0.0534671	-5.77783e-05	0.817233
ENSG00000163466.14.vs.ENSG00000179921.13	0.000629665	0.122865	0.58362
ENSG00000163535.16.vs.ENSG00000138356.12	0.0203683	-0.00284389	0.0611577
ENSG00000163611.10.vs.ENSG00000206530.7	-0.00928225	-0.00535134	0.381671
ENSG00000163684.10.vs.ENSG00000168297.14	-0.00498321	-0.0258769	0.180789
ENSG00000163703.16.vs.ENSG00000230082.1	0.0023059	0.0173036	0.76607
ENSG00000163735.6.vs.ENSG00000163736.3	0.00421386	0.0231252	0.770814
ENSG00000163738.17.vs.ENSG00000182585.8	0.00736802	0.0469522	0.257789
ENSG00000163746.10.vs.ENSG00000279320.1	0.483275	-0.18685	0.146205
ENSG00000163794.6.vs.ENSG00000115204.13	-0.101214	0.00477825	0.493443
ENSG00000163811.10.vs.ENSG00000189350.11	0.00941305	-0.118908	0.016937
ENSG00000163820.13.vs.ENSG00000163818.15	0.00485226	-0.0291675	0.00771737
ENSG00000163866.8.vs.ENSG00000116544.10	0.00552726	0.0236732	0.730072
ENSG00000163898.8.vs.ENSG00000163900.9	0.0141819	-0.00346284	0.028502
ENSG00000163939.17.vs.ENSG00000016864.15	-0.00239215	-0.00422363	0.569386
ENSG00000164081.11.vs.ENSG00000164082.13	-0.00164627	-0.0179809	0.864288
ENSG00000164104.10.vs.ENSG00000248774.1	0.000248293	-0.0448382	0.978142
ENSG00000164144.13.vs.ENSG00000231841.1	-0.00168863	2.10592	0.527449
ENSG00000164181.12.vs.ENSG00000250148.1	-0.00746672	-0.186487	0.759971
ENSG00000164188.7.vs.ENSG00000152620.11	-0.042109	0.00544365	0.268048
ENSG00000164221.11.vs.ENSG00000243304.3	0.00650573	2.47878	0.10386
ENSG00000164237.7.vs.ENSG00000271980.1	0.000189149	0.250273	0.773302
ENSG00000164329.12.vs.ENSG00000164309.13	-0.00460402	-0.0201053	0.000726059
ENSG00000164414.15.vs.ENSG00000272514.4	-0.00413817	-0.906665	0.220464
ENSG00000164434.10.vs.ENSG00000172594.11	-0.00289551	0.000802618	0.69822
ENSG00000164535.13.vs.ENSG00000231359.3	0.0247456	-0.141534	0.150781
ENSG00000164591.12.vs.ENSG00000171992.11	0.000319898	-8.93725e-05	0.999172
ENSG00000164597.12.vs.ENSG00000272072.1	0.00260152	0.0508437	0.779136
ENSG00000164647.7.vs.ENSG00000157214.12	0.0269495	-0.0171089	0.00660794
ENSG00000164663.12.vs.ENSG00000137218.9	-0.00115533	0.0292899	0.654911
ENSG00000164675.9.vs.ENSG00000128609.13	-0.209718	-0.00190149	0.155261
ENSG00000164889.11.vs.ENSG00000133612.17	-0.00147676	0.0053572	0.298866
ENSG00000164889.11.vs.ENSG00000197150.11	-0.000361714	0.00640906	0.590092
ENSG00000164889.11.vs.ENSG00000213199.6	0.000902055	-0.0240363	0.792928
ENSG00000164897.11.vs.ENSG00000244151.1	0.0106089	-0.406618	0.158836
ENSG00000164916.10.vs.ENSG00000242802.5	0.00912727	0.00410201	0.000419379
ENSG00000164941.12.vs.ENSG00000272509.1	0.0020877	0.410648	0.30021
ENSG00000164967.8.vs.ENSG00000137100.14	0.0198607	-0.00218375	0.10096
ENSG00000164967.8.vs.ENSG00000205143.2	0.0155792	0.582926	0.00761266
ENSG00000164976.8.vs.ENSG00000164972.11	0.000498666	-0.13167	0.808261
ENSG00000165028.10.vs.ENSG00000136783.9	-0.0188365	0.0217024	0.0550212
ENSG00000165066.12.vs.ENSG00000029534.18	-0.0542225	0.000856896	0.817863
ENSG00000165071.13.vs.ENSG00000129295.7	0.00401459	-0.0319001	0.11215
ENSG00000165140.8.vs.ENSG00000130957.4	-0.0013967	0.111955	0.628081
ENSG00000165240.16.vs.ENSG00000131174.4	-0.00456944	0.00329182	0.250458
ENSG00000165275.8.vs.ENSG00000070601.8	-0.0284066	-0.0484824	0.487117
ENSG00000165406.14.vs.ENSG00000231964.1	-0.00734523	-0.770302	0.0846408
ENSG00000165458.12.vs.ENSG00000165457.12	-0.00149738	0.00804527	4.60946e-05
ENSG00000165650.10.vs.ENSG00000277879.1	-0.00611923	-0.0533489	0.496441
ENSG00000165684.3.vs.ENSG00000187796.12	0.0106098	0.0271752	0.0145065
ENSG00000165704.13.vs.ENSG00000226107.1	0.00149416	-0.769185	0.791141
ENSG00000165802.18.vs.ENSG00000188833.8	0.0122094	-0.0194565	3.18888e-06
ENSG00000165816.11.vs.ENSG00000095627.8	-0.0178253	0.00842692	0.0196652
ENSG00000165821.10.vs.ENSG00000165819.10	-0.00927106	-0.0222155	0.0203297
ENSG00000165912.14.vs.ENSG00000243802.2	-0.000617267	0.0758932	0.646473
ENSG00000165916.7.vs.ENSG00000255197.4	-0.000244028	-0.156647	0.392214
ENSG00000165923.14.vs.ENSG00000109920.11	-0.0760833	-0.00911847	0.114793
ENSG00000165929.11.vs.ENSG00000140092.13	-0.000688674	-0.000227727	0.783064
ENSG00000165953.8.vs.ENSG00000170054.13	-0.0439613	0.0507653	0.751666
ENSG00000166024.12.vs.ENSG00000230928.1	-0.0483381	0.12391	0.0976898
ENSG00000166197.15.vs.ENSG00000148840.9	-0.000385075	0.00330978	0.892215
ENSG00000166250.10.vs.ENSG00000109971.12	-0.00133899	0.00026638	0.370704
ENSG00000166323.11.vs.ENSG00000178202.11	0.191115	0.00118362	0.486177
ENSG00000166337.8.vs.ENSG00000166341.7	-0.00466351	-0.00356425	0.541821
ENSG00000166343.8.vs.ENSG00000138279.14	-0.202306	-0.00365543	0.153745
ENSG00000166510.12.vs.ENSG00000267112.1	0.0173727	-1.01497	0.348927
ENSG00000166529.13.vs.ENSG00000106261.15	-0.18476	0.000811193	0.0242538
ENSG00000166557.11.vs.ENSG00000169330.7	0.000694916	0.0308235	0.266892
ENSG00000166670.8.vs.ENSG00000196611.4	0.0050194	0.00132534	0.0635186
ENSG00000166747.11.vs.ENSG00000040199.17	0.00632368	-0.057739	0.0158497
ENSG00000166794.4.vs.ENSG00000169118.14	0.000600334	-0.0106065	0.246608
ENSG00000166796.10.vs.ENSG00000166800.8	0.00837791	-0.280858	0.850931
ENSG00000166813.13.vs.ENSG00000166819.10	-0.00901818	0.000724911	0.780365
ENSG00000166819.10.vs.ENSG00000241362.2	0.0014588	-1.48186	0.0214091
ENSG00000166822.11.vs.ENSG00000183196.7	-0.00612944	0.0215386	0.349067
ENSG00000166896.6.vs.ENSG00000257159.1	0.004903	0.628178	0.751764
ENSG00000166908.16.vs.ENSG00000155980.10	-0.00147764	0.00855921	0.766563
ENSG00000166908.16.vs.ENSG00000178498.14	-0.00109567	-0.00209365	0.825328
ENSG00000166908.16.vs.ENSG00000240771.5	-0.00133185	0.00015857	0.856041
ENSG00000166912.15.vs.ENSG00000134160.12	-0.0111301	-0.732313	0.468332
ENSG00000166971.15.vs.ENSG00000279344.1	0.00945566	0.29571	0.150465
ENSG00000166971.15.vs.ENSG00000279722.1	0.010716	-0.0265959	0.50378
ENSG00000166986.11.vs.ENSG00000111087.8	0.000363717	-0.122999	0.288984
ENSG00000167074.13.vs.ENSG00000100403.11	-0.00872697	0.000212912	0.547192
ENSG00000167077.11.vs.ENSG00000100147.12	-0.0382894	0.105699	0.0277513
ENSG00000167085.10.vs.ENSG00000229944.3	-7.80319e-05	0.59243	0.618354
ENSG00000167100.13.vs.ENSG00000108819.10	0.00421732	-0.00179642	0.729978
ENSG00000167103.10.vs.ENSG00000167106.10	-0.0847009	-0.000252999	0.259022
ENSG00000167104.10.vs.ENSG00000078898.6	-0.367954	-0.0010832	0.849651
ENSG00000167107.11.vs.ENSG00000136444.8	-0.0175868	0.00261483	0.0445855
ENSG00000167118.9.vs.ENSG00000167114.11	0.00555561	0.000800558	0.399565
ENSG00000167123.17.vs.ENSG00000228510.2	0.0025474	-0.168866	0.164381
ENSG00000167130.16.vs.ENSG00000148343.17	0.0189722	-0.0214739	0.173129
ENSG00000167130.16.vs.ENSG00000234055.1	0.0116743	-0.708507	0.49994
ENSG00000167136.6.vs.ENSG00000107021.14	0.0214483	0.00336883	0.623207
ENSG00000167216.15.vs.ENSG00000267724.1	0.0162518	0.143418	0.48016
ENSG00000167220.10.vs.ENSG00000134049.4	-0.0186912	0.00653838	0.18076
ENSG00000167264.16.vs.ENSG00000072736.17	0.0507583	-0.00887552	0.00177397
ENSG00000167355.6.vs.ENSG00000175518.6	0.548088	-0.0238929	0.357968
ENSG00000167371.15.vs.ENSG00000079616.11	-0.0107445	0.00291649	0.468931
ENSG00000167371.15.vs.ENSG00000281348.1	-0.00896243	0.717341	0.830819
ENSG00000167384.9.vs.ENSG00000273777.3	-0.0399024	0.0487987	0.323144
ENSG00000167397.13.vs.ENSG00000151006.7	0.00834488	-0.0027688	0.0507685
ENSG00000167414.4.vs.ENSG00000160013.7	-2.88265	0.159018	0.0202476
ENSG00000167414.4.vs.ENSG00000279161.1	-1.1603	0.323941	0.638509
ENSG00000167460.13.vs.ENSG00000167461.10	0.00023913	-0.00241345	0.791779
ENSG00000167470.11.vs.ENSG00000099624.6	-0.00106277	0.00275904	0.160475
ENSG00000167483.16.vs.ENSG00000130309.9	-0.0413557	0.00224196	0.111962
ENSG00000167536.12.vs.ENSG00000109118.12	-0.00614822	-0.00797844	0.179593
ENSG00000167548.13.vs.ENSG00000167550.9	-0.00173302	-0.0346515	0.702626
ENSG00000167554.13.vs.ENSG00000221923.7	-0.0302491	-0.0137782	0.247866
ENSG00000167614.12.vs.ENSG00000235681.1	0.00140265	-0.0866008	0.699214
ENSG00000167619.10.vs.ENSG00000188368.8	0.010273	0.0725882	0.0462674
ENSG00000167656.4.vs.ENSG00000180155.17	-0.000249519	0.00622486	0.0023466
ENSG00000167657.10.vs.ENSG00000167658.14	0.00566729	-4.28859e-05	0.162564
ENSG00000167670.14.vs.ENSG00000267769.1	0.00876568	-0.687286	0.22238
ENSG00000167670.14.vs.ENSG00000280239.1	0.00717177	-0.060423	0.329383
ENSG00000167676.3.vs.ENSG00000214456.7	0.000416225	-0.0396838	0.0241988
ENSG00000167680.14.vs.ENSG00000171236.9	-0.000566697	-0.00382308	0.16234
ENSG00000167680.14.vs.ENSG00000214456.7	0.00621501	-0.0420359	0.0238664
ENSG00000167680.14.vs.ENSG00000267385.1	0.00461421	-0.523382	0.030749
ENSG00000167693.15.vs.ENSG00000262434.1	0.00495861	0.250797	0.0536849
ENSG00000167699.12.vs.ENSG00000262434.1	-0.00700772	0.60543	0.376238
ENSG00000167700.7.vs.ENSG00000160972.8	0.00318556	0.00242762	0.219221
ENSG00000167700.7.vs.ENSG00000265393.1	0.00749627	-0.868788	0.106332
ENSG00000167701.12.vs.ENSG00000167700.7	-0.000288821	0.00470796	0.238206
ENSG00000167701.12.vs.ENSG00000265393.1	0.00312743	-0.0635539	0.948582
ENSG00000167703.13.vs.ENSG00000174238.13	-0.00184906	-0.00592302	0.170663
ENSG00000167711.12.vs.ENSG00000132386.9	-0.00941871	0.000920549	0.461686
ENSG00000167741.9.vs.ENSG00000132382.13	-0.0063588	0.00418912	0.298233
ENSG00000167754.11.vs.ENSG00000167755.12	0.000846307	0.00137703	0.00233232
ENSG00000167757.12.vs.ENSG00000129451.10	-0.00499186	0.00239874	0.141058
ENSG00000167757.12.vs.ENSG00000186474.14	-0.00170402	-0.00716504	0.687378
ENSG00000167768.4.vs.ENSG00000189182.8	-0.00276574	-0.000800134	0.91032
ENSG00000167770.10.vs.ENSG00000176340.3	-0.00613414	0.00431891	0.267085
ENSG00000167778.7.vs.ENSG00000257337.5	0.00185169	-0.00768098	0.597381
ENSG00000167780.10.vs.ENSG00000167779.6	0.235504	0.00624799	0.0793449
ENSG00000167800.9.vs.ENSG00000132744.6	0.0077733	-0.0664623	0.769147
ENSG00000167800.9.vs.ENSG00000167799.8	-0.00414474	0.00302523	0.922277
ENSG00000167874.6.vs.ENSG00000280046.1	0.0403866	-0.126071	0.516205
ENSG00000167895.13.vs.ENSG00000187997.10	-0.00803966	0.493705	0.519933
ENSG00000167914.9.vs.ENSG00000108344.13	0.0409725	-0.000163259	0.760714
ENSG00000167925.14.vs.ENSG00000089558.7	-0.000730696	0.00402397	0.989214
ENSG00000167925.14.vs.ENSG00000173757.8	0.00197412	-0.00793551	0.113356
ENSG00000167930.14.vs.ENSG00000206168.1	0.000311331	0.116865	0.985972
ENSG00000167967.14.vs.ENSG00000261663.1	0.00939519	-0.263352	0.342435
ENSG00000167968.11.vs.ENSG00000261663.1	-0.0480456	0.00452079	0.795694
ENSG00000167992.11.vs.ENSG00000167986.12	-0.123274	-0.000378964	0.693476
ENSG00000167994.10.vs.ENSG00000221968.7	0.0323165	-0.0184886	0.0142079
ENSG00000168016.12.vs.ENSG00000281100.1	-0.0143853	0.767832	0.0922137
ENSG00000168028.12.vs.ENSG00000144659.9	0.00032899	-0.00896341	0.519947
ENSG00000168070.10.vs.ENSG00000149735.5	0.10793	-0.146645	0.811651
ENSG00000168071.20.vs.ENSG00000162302.11	-0.0144294	0.00847571	0.244222
ENSG00000168228.13.vs.ENSG00000053900.9	-0.0106474	-0.0140882	0.629762
ENSG00000168234.11.vs.ENSG00000154040.19	-0.00164123	-0.00943752	0.706222
ENSG00000168255.17.vs.ENSG00000105808.16	-0.00402947	-0.000249597	0.99601
ENSG00000168259.13.vs.ENSG00000187595.13	-0.00128051	0.00735188	0.807231
ENSG00000168273.6.vs.ENSG00000010327.9	0.0215747	0.00212934	0.00589359
ENSG00000168297.14.vs.ENSG00000272182.1	-0.0294723	0.558499	0.119693
ENSG00000168298.5.vs.ENSG00000217159.2	0.0037659	-1.17681	0.440509
ENSG00000168309.15.vs.ENSG00000198643.5	0.00589064	-0.00273198	0.0792925
ENSG00000168395.13.vs.ENSG00000228989.1	-0.00755748	0.0567464	0.612948
ENSG00000168439.15.vs.ENSG00000149781.11	0.00148407	-0.00271262	0.163916
ENSG00000168453.13.vs.ENSG00000168476.10	0.00227409	0.00445413	0.261898
ENSG00000168453.13.vs.ENSG00000275074.1	0.00313056	-0.0134673	0.260364
ENSG00000168703.5.vs.ENSG00000175121.10	0.072961	-0.127995	0.895411
ENSG00000168758.9.vs.ENSG00000163126.13	0.00170836	-0.127867	0.477407
ENSG00000168758.9.vs.ENSG00000168754.12	0.000141836	0.00953181	0.329332
ENSG00000168758.9.vs.ENSG00000213337.7	0.000405713	0.00677091	0.772669
ENSG00000168765.14.vs.ENSG00000235045.2	-0.0116425	2.88129	0.053404
ENSG00000168778.10.vs.ENSG00000185344.12	-0.0271468	0.0152169	0.0125716
ENSG00000168792.4.vs.ENSG00000108262.14	-0.0116832	0.00165476	0.490169
ENSG00000168894.8.vs.ENSG00000168899.4	0.00385649	-0.0046006	0.55899
ENSG00000168918.12.vs.ENSG00000085978.20	-0.00992081	-0.00425176	0.213347
ENSG00000168993.13.vs.ENSG00000249592.4	0.0152523	-0.0270577	0.309845
ENSG00000169035.10.vs.ENSG00000167755.12	-0.00800777	0.00334593	1.95728e-05
ENSG00000169045.16.vs.ENSG00000204661.8	-0.00128894	-2.96265	0.120968
ENSG00000169057.18.vs.ENSG00000184216.10	0.000405347	0.00141112	0.165834
ENSG00000169062.13.vs.ENSG00000130177.13	-0.0156603	0.00577976	0.513414
ENSG00000169105.7.vs.ENSG00000140320.10	0.0121586	0.00978272	0.0680196
ENSG00000169249.11.vs.ENSG00000169239.11	-0.0256489	-0.0136742	0.260177
ENSG00000169299.12.vs.ENSG00000249863.2	-0.00532628	0.241992	0.624592
ENSG00000169313.9.vs.ENSG00000181631.6	-0.289441	-0.011986	0.025808
ENSG00000169344.14.vs.ENSG00000169347.15	-0.212551	-0.000480823	0.368745
ENSG00000169375.14.vs.ENSG00000169410.8	-0.00704236	0.00565864	0.233702
ENSG00000169413.2.vs.ENSG00000258810.1	-0.0188067	-0.19128	0.248646
ENSG00000169548.3.vs.ENSG00000275004.2	-0.284302	0.0561187	0.587399
ENSG00000169592.13.vs.ENSG00000149930.16	0.00440504	-0.00501417	0.584208
ENSG00000169599.11.vs.ENSG00000198380.11	0.00370798	0.000433957	0.676573
ENSG00000169607.11.vs.ENSG00000115008.5	0.0121327	0.0567851	0.225992
ENSG00000169714.15.vs.ENSG00000240682.8	-0.00122932	0.0102591	0.567853
ENSG00000169715.13.vs.ENSG00000205364.3	0.00683161	-0.0632356	0.0101679
ENSG00000169718.16.vs.ENSG00000169733.10	-0.00207611	0.00276993	0.732922
ENSG00000169857.6.vs.ENSG00000259287.2	0.0431389	-0.44672	0.0629888
ENSG00000169857.6.vs.ENSG00000259408.2	0.0450695	-0.292345	0.0588693
ENSG00000169884.12.vs.ENSG00000134287.8	-0.0778482	-0.000968615	0.538145
ENSG00000169884.12.vs.ENSG00000272822.1	-0.0745916	1.19086	0.2724
ENSG00000169964.5.vs.ENSG00000163810.10	0.0142228	0.00363325	0.139441
ENSG00000169991.9.vs.ENSG00000159423.15	0.00540673	0.000129126	0.0549736
ENSG00000170049.8.vs.ENSG00000179859.7	-0.0451473	-0.0223238	0.751098
ENSG00000170085.16.vs.ENSG00000250909.1	0.00469504	-0.688803	0.730874
ENSG00000170085.16.vs.ENSG00000251414.1	0.00399543	-0.155252	0.917516
ENSG00000170113.14.vs.ENSG00000140157.13	-0.00182313	0.0131688	0.112226
ENSG00000170165.5.vs.ENSG00000236816.2	8.44801	-4.9584	0.0117665
ENSG00000170175.9.vs.ENSG00000181284.2	-0.0545511	0.0532319	0.0288264
ENSG00000170209.4.vs.ENSG00000256757.1	-0.110684	2.72638	9.24587e-06
ENSG00000170236.13.vs.ENSG00000092439.12	-3.77484	-6.46787e-05	0.352753
ENSG00000170236.13.vs.ENSG00000259298.1	-3.94476	0.0861071	0.346237
ENSG00000170260.7.vs.ENSG00000204946.8	-0.0197357	0.00654434	0.69931
ENSG00000170356.8.vs.ENSG00000243896.3	0.566718	-0.26262	0.111459
ENSG00000170374.5.vs.ENSG00000094914.11	-0.0603082	0.00520307	0.794311
ENSG00000170469.9.vs.ENSG00000170464.8	0.00815867	-0.0443946	0.436187
ENSG00000170469.9.vs.ENSG00000170476.14	-0.0180078	0.000326463	0.942034
ENSG00000170482.15.vs.ENSG00000170476.14	-0.132905	0.000619598	0.176989
ENSG00000170498.8.vs.ENSG00000174567.7	0.313853	-0.0335787	0.087304
ENSG00000170515.12.vs.ENSG00000135482.5	0.00215013	-0.0123329	0.277059
ENSG00000170515.12.vs.ENSG00000139641.11	0.00200507	0.00133353	0.245949
ENSG00000170515.12.vs.ENSG00000229117.7	0.0028233	-0.00208548	0.0717972
ENSG00000170523.3.vs.ENSG00000257829.1	0.0037956	0.0955738	0.631013
ENSG00000170540.13.vs.ENSG00000134419.14	-0.00021092	-0.00012718	0.892214
ENSG00000170604.4.vs.ENSG00000176182.5	0.00143576	0.0291615	0.487481
ENSG00000170653.17.vs.ENSG00000135390.16	6.49331e-05	0.000324331	0.931455
ENSG00000170689.9.vs.ENSG00000120068.6	-0.00857233	0.000829983	0.801352
ENSG00000170835.13.vs.ENSG00000148308.16	-0.000217959	0.00555316	0.0810494
ENSG00000170949.16.vs.ENSG00000170954.10	-0.0226589	0.00490216	0.175657
ENSG00000171109.17.vs.ENSG00000121864.8	-0.000180858	0.00660745	0.317824
ENSG00000171135.12.vs.ENSG00000163701.17	0.00108301	0.000460482	0.958561
ENSG00000171199.8.vs.ENSG00000171201.9	0.00230301	-0.00362405	4.87017e-06
ENSG00000171219.8.vs.ENSG00000110047.16	0.0095454	0.00103544	0.0582052
ENSG00000171241.7.vs.ENSG00000259856.1	0.0234002	-0.15473	0.0122515
ENSG00000171302.15.vs.ENSG00000265096.1	-0.000976299	-1.61305	0.427766
ENSG00000171346.12.vs.ENSG00000171345.12	-0.000264624	-0.000100055	0.368763
ENSG00000171346.12.vs.ENSG00000171401.13	-0.000251497	-0.00840812	0.468436
ENSG00000171425.8.vs.ENSG00000063244.11	-0.00108378	0.00189573	0.425603
ENSG00000171431.3.vs.ENSG00000187242.4	-0.000403922	0.121503	0.072287
ENSG00000171443.6.vs.ENSG00000261221.3	0.0129936	0.00177769	0.21054
ENSG00000171466.8.vs.ENSG00000239830.1	0.0101586	-0.00654316	0.0565006
ENSG00000171475.12.vs.ENSG00000094804.8	-0.00351842	0.00184309	0.332425
ENSG00000171540.7.vs.ENSG00000164253.11	-0.063771	0.0195611	0.0271998
ENSG00000171574.16.vs.ENSG00000269855.2	-0.03566	0.178284	0.566567
ENSG00000171606.16.vs.ENSG00000213013.4	0.00446238	-0.238504	0.823642
ENSG00000171611.8.vs.ENSG00000137161.15	-0.692491	0.00223476	0.240145
ENSG00000171631.13.vs.ENSG00000110237.3	0.0115229	-0.00178069	0.465205
ENSG00000171723.14.vs.ENSG00000172717.14	-0.010723	0.124157	0.437176
ENSG00000171747.7.vs.ENSG00000104823.7	-0.165033	0.00130218	0.661584
ENSG00000171773.2.vs.ENSG00000188051.6	1.02314	-0.539741	0.137537
ENSG00000171793.12.vs.ENSG00000281207.1	0.00374828	-0.110562	0.496187
ENSG00000171903.15.vs.ENSG00000267218.2	-0.0608124	-0.549513	0.0181131
ENSG00000171931.11.vs.ENSG00000108448.19	0.0800957	-0.00464431	0.818722
ENSG00000171931.11.vs.ENSG00000171928.12	0.094733	-0.00690033	0.620094
ENSG00000172006.10.vs.ENSG00000172009.13	-0.0902065	0.00810942	0.0237762
ENSG00000172053.13.vs.ENSG00000172046.17	-0.00085799	-0.0081633	0.219579
ENSG00000172061.8.vs.ENSG00000178772.6	-0.000174873	-0.00585731	0.956783
ENSG00000172062.15.vs.ENSG00000172058.14	-0.0332312	0.229341	0.75713
ENSG00000172113.7.vs.ENSG00000228638.1	-0.00543852	-0.0302678	0.551068
ENSG00000172113.7.vs.ENSG00000229453.2	-0.0157458	0.000104946	0.672439
ENSG00000172183.13.vs.ENSG00000181026.14	-0.00307623	0.00944088	0.533848
ENSG00000172232.8.vs.ENSG00000196415.8	-0.0264789	0.0327092	0.891247
ENSG00000172301.9.vs.ENSG00000108651.8	-0.00189989	0.00554659	0.534531
ENSG00000172350.8.vs.ENSG00000160703.14	0.95141	0.0106671	3.67954e-07
ENSG00000172375.11.vs.ENSG00000172273.11	-0.000652581	-0.0120601	0.817352
ENSG00000172428.9.vs.ENSG00000178602.6	-0.00101392	0.0698165	0.86968
ENSG00000172508.9.vs.ENSG00000175463.10	0.0386746	-0.0212141	0.0426033
ENSG00000172586.7.vs.ENSG00000214655.9	-0.000366657	-0.0099053	0.255536
ENSG00000172613.6.vs.ENSG00000172830.11	0.00489193	-0.00361192	0.480647
ENSG00000172613.6.vs.ENSG00000175463.10	-0.00149942	-0.0179314	0.414127
ENSG00000172757.11.vs.ENSG00000172638.11	0.000311458	0.00480328	0.0190794
ENSG00000172785.17.vs.ENSG00000170122.5	-0.00720433	0.144243	0.696265
ENSG00000172789.3.vs.ENSG00000197757.7	-0.545039	0.0141614	0.34098
ENSG00000172817.3.vs.ENSG00000254102.1	0.0262725	0.106858	0.0132942
ENSG00000172932.13.vs.ENSG00000173020.9	0.00192013	-0.00121783	0.92012
ENSG00000172977.11.vs.ENSG00000214659.4	-0.00255921	-0.980984	0.260868
ENSG00000173041.10.vs.ENSG00000213642.3	-0.0119249	0.0881963	0.438435
ENSG00000173041.10.vs.ENSG00000235349.1	-0.0118254	0.233407	0.41126
ENSG00000173083.13.vs.ENSG00000173085.12	-0.00579727	0.028985	0.243826
ENSG00000173120.13.vs.ENSG00000173020.9	-0.00141407	0.000576391	0.706293
ENSG00000173156.5.vs.ENSG00000173227.12	0.00472627	-0.00491109	0.254225
ENSG00000173230.14.vs.ENSG00000180353.9	-0.00134279	-0.00570944	0.195602
ENSG00000173369.14.vs.ENSG00000159189.10	-0.0100724	0.0120975	0.149216
ENSG00000173404.4.vs.ENSG00000280229.1	-0.00416168	0.411995	0.0559391
ENSG00000173432.9.vs.ENSG00000212789.4	-0.000833456	-0.0907949	0.730041
ENSG00000173451.5.vs.ENSG00000139291.12	0.067959	-0.00881961	0.0126457
ENSG00000173480.9.vs.ENSG00000196724.11	-0.00869706	-0.0110875	0.789925
ENSG00000173611.16.vs.ENSG00000119414.10	0.0188954	-0.00112215	0.570985
ENSG00000173674.9.vs.ENSG00000177189.11	0.00101267	-0.000374958	0.93994
ENSG00000173674.9.vs.ENSG00000184368.14	0.00110483	-0.0100852	0.833332
ENSG00000173692.11.vs.ENSG00000204128.5	0.000806278	0.00101322	0.920635
ENSG00000173726.9.vs.ENSG00000188739.13	-0.000272681	0.103421	0.24226
ENSG00000173825.6.vs.ENSG00000133884.8	-0.0592771	0.00607016	0.473504
ENSG00000173825.6.vs.ENSG00000255478.1	0.0158909	-4.25269	0.295955
ENSG00000173846.11.vs.ENSG00000222009.7	-0.00842366	0.0752062	0.212362
ENSG00000173914.10.vs.ENSG00000173898.10	-0.0125269	0.000300671	0.729051
ENSG00000173917.10.vs.ENSG00000120093.10	-0.00419531	0.0043878	0.320912
ENSG00000173917.10.vs.ENSG00000120094.6	-0.000550539	-0.279718	0.549962
ENSG00000173991.5.vs.ENSG00000141744.3	-0.0296942	-5.29098e-05	0.712854
ENSG00000174109.4.vs.ENSG00000059145.17	0.016481	0.0156606	0.0979328
ENSG00000174123.9.vs.ENSG00000174125.6	-0.064479	0.00501732	0.473352
ENSG00000174197.15.vs.ENSG00000137802.12	0.00480261	-0.00571577	0.403284
ENSG00000174236.3.vs.ENSG00000276261.1	-0.391695	0.649565	0.38844
ENSG00000174243.8.vs.ENSG00000172602.8	-0.00146526	-0.00485658	0.521641
ENSG00000174327.6.vs.ENSG00000161940.9	0.054336	0.0106411	0.0714432
ENSG00000174444.13.vs.ENSG00000261351.2	-1.24384e-05	-0.170987	0.710052
ENSG00000174498.12.vs.ENSG00000103742.10	-0.0305428	-0.00273981	0.354192
ENSG00000174885.11.vs.ENSG00000142102.14	-0.21456	-0.00124656	0.141864
ENSG00000174885.11.vs.ENSG00000255026.1	-0.395796	0.0122006	0.132947
ENSG00000174944.7.vs.ENSG00000174946.6	-0.0707643	-0.0171706	0.495981
ENSG00000174990.4.vs.ENSG00000260443.1	0.923229	0.625708	0.677417
ENSG00000175061.16.vs.ENSG00000187688.13	-0.000200593	0.00245169	0.894212
ENSG00000175066.14.vs.ENSG00000114126.16	-0.000757349	-0.00790488	0.368588
ENSG00000175084.10.vs.ENSG00000072195.13	-0.00501108	0.00807599	0.0349026
ENSG00000175166.15.vs.ENSG00000114867.18	-0.000265913	0.00113566	0.262606
ENSG00000175189.3.vs.ENSG00000111087.8	-0.0886548	-0.126898	0.285675
ENSG00000175189.3.vs.ENSG00000139269.2	-0.0584732	-0.00126126	0.982821
ENSG00000175265.16.vs.ENSG00000259904.1	-0.000586012	1.37915	0.455461
ENSG00000175309.13.vs.ENSG00000050767.14	-0.0146947	0.0410849	0.0582977
ENSG00000175318.10.vs.ENSG00000067225.16	-0.00885772	0.000328796	0.135234
ENSG00000175414.6.vs.ENSG00000251414.1	0.00680741	-0.183768	0.832895
ENSG00000175513.8.vs.ENSG00000175467.13	0.139905	0.000545329	0.709651
ENSG00000175567.7.vs.ENSG00000255847.4	-0.000753079	-1.79293	0.46392
ENSG00000175592.7.vs.ENSG00000172500.11	0.00772099	0.00280925	0.391915
ENSG00000175602.3.vs.ENSG00000172543.6	0.00552208	-0.0482742	0.0710783
ENSG00000175634.13.vs.ENSG00000172508.9	-0.000290031	0.0340667	0.196832
ENSG00000175643.8.vs.ENSG00000263179.1	-0.00469453	1.68915	0.66755
ENSG00000175691.8.vs.ENSG00000253392.2	-0.0136852	-0.0257912	0.936577
ENSG00000175820.3.vs.ENSG00000151287.15	0.0963351	0.00427354	0.89183
ENSG00000175874.8.vs.ENSG00000196460.11	0.101303	0.208898	0.0135351
ENSG00000175879.8.vs.ENSG00000128709.11	-0.00392986	0.0204948	0.638103
ENSG00000175879.8.vs.ENSG00000128710.5	9.7409e-05	0.0276234	0.961203
ENSG00000176040.12.vs.ENSG00000114529.11	-0.777476	-0.00172307	0.595364
ENSG00000176092.12.vs.ENSG00000176083.16	0.0132264	-0.0348589	0.434511
ENSG00000176148.14.vs.ENSG00000121690.8	0.0228916	0.0169586	0.11024
ENSG00000176155.17.vs.ENSG00000169710.6	-0.0134967	-0.000191675	0.036409
ENSG00000176160.8.vs.ENSG00000108389.8	0.511985	-0.00471263	0.0165709
ENSG00000176194.16.vs.ENSG00000280302.1	0.0349609	-5.1092	0.132796
ENSG00000176320.2.vs.ENSG00000229914.1	-3.01937	1.82198	0.434222
ENSG00000176393.9.vs.ENSG00000238003.1	0.00187354	0.552999	0.237475
ENSG00000176454.12.vs.ENSG00000259904.1	0.0141451	1.10822	0.178475
ENSG00000176531.9.vs.ENSG00000124466.8	0.00304191	0.000643239	0.810418
ENSG00000176700.18.vs.ENSG00000176371.12	-0.0892259	0.0171625	0.494525
ENSG00000176749.7.vs.ENSG00000266718.1	0.0222668	-0.544365	0.163633
ENSG00000176871.7.vs.ENSG00000277873.1	0.0048123	1.00645	0.00831925
ENSG00000176896.8.vs.ENSG00000123595.6	-0.0254705	0.00455889	0.824319
ENSG00000176927.13.vs.ENSG00000126653.14	0.206043	-0.00531903	0.144654
ENSG00000176953.9.vs.ENSG00000169682.16	-0.0150552	0.0675968	0.136428
ENSG00000176973.7.vs.ENSG00000173442.10	0.0128467	-0.000646786	0.110619
ENSG00000177025.3.vs.ENSG00000166704.10	-0.0837781	-0.00289754	0.604762
ENSG00000177025.3.vs.ENSG00000243234.1	-0.17225	2.13792	0.467192
ENSG00000177030.15.vs.ENSG00000269915.1	-0.00154779	-0.14277	0.902483
ENSG00000177191.2.vs.ENSG00000105341.17	-0.00537745	0.00116399	0.980848
ENSG00000177202.2.vs.ENSG00000088002.10	0.159165	-0.0088477	0.442076
ENSG00000177234.7.vs.ENSG00000203805.9	-0.344169	0.0196942	0.636898
ENSG00000177363.4.vs.ENSG00000162191.12	-0.00167538	-0.000314788	0.991968
ENSG00000177427.11.vs.ENSG00000260647.1	-0.0217761	-0.745467	0.0664914
ENSG00000177453.6.vs.ENSG00000261604.1	0.0381622	0.31351	0.0282594
ENSG00000177465.4.vs.ENSG00000279026.1	-0.0324986	0.0497583	0.0500765
ENSG00000177602.5.vs.ENSG00000262692.1	0.0647663	-1.37877	0.0852473
ENSG00000177646.16.vs.ENSG00000250796.1	0.00877989	0.0361494	0.251191
ENSG00000177674.14.vs.ENSG00000215910.6	-0.00257466	-0.139938	0.545747
ENSG00000177733.6.vs.ENSG00000146021.13	0.00133193	0.00723495	0.729415
ENSG00000177791.11.vs.ENSG00000166317.10	-0.0161573	0.000666801	0.77029
ENSG00000177830.16.vs.ENSG00000250397.2	0.00191313	-0.0969798	0.698208
ENSG00000177839.6.vs.ENSG00000120322.3	0.0352501	0.00863239	0.109977
ENSG00000177839.6.vs.ENSG00000197479.6	0.0365206	0.00580454	0.114132
ENSG00000177842.10.vs.ENSG00000172888.10	-0.151876	0.00936616	0.0925926
ENSG00000177873.11.vs.ENSG00000188846.12	-0.0610628	-0.000104149	0.10053
ENSG00000177888.7.vs.ENSG00000066279.15	-0.0026947	0.00619662	0.0472396
ENSG00000178187.6.vs.ENSG00000254035.1	0.09026	0.0430565	0.430907
ENSG00000178217.12.vs.ENSG00000108219.13	-0.138625	-0.00037689	0.836726
ENSG00000178226.9.vs.ENSG00000052344.14	0.017018	-0.00138781	0.297515
ENSG00000178386.11.vs.ENSG00000186026.6	-0.0834688	-0.0232142	0.717824
ENSG00000178401.13.vs.ENSG00000123352.16	-0.00674114	0.0084878	0.472991
ENSG00000178460.16.vs.ENSG00000104205.11	0.125486	-0.0130497	0.000909142
ENSG00000178691.9.vs.ENSG00000185158.11	0.000742728	-0.0513541	0.437643
ENSG00000178752.14.vs.ENSG00000168427.8	0.0336908	0.117593	0.0616443
ENSG00000178773.13.vs.ENSG00000167526.12	0.00343427	8.62034e-05	0.552105
ENSG00000178789.7.vs.ENSG00000167850.3	-0.0912673	0.051826	0.457351
ENSG00000178826.9.vs.ENSG00000239419.3	0.00802882	0.0717901	0.310674
ENSG00000179071.4.vs.ENSG00000137501.15	0.102416	-0.000876113	0.143158
ENSG00000179082.3.vs.ENSG00000268615.1	-0.0325499	-2.83781	0.0642577
ENSG00000179091.4.vs.ENSG00000179632.8	0.00178532	0.00100638	0.0315353
ENSG00000179094.12.vs.ENSG00000220205.7	-0.00378471	-0.000689221	0.476153
ENSG00000179111.7.vs.ENSG00000179148.8	-0.0487897	0.0457929	0.308323
ENSG00000179163.11.vs.ENSG00000117305.13	-0.0116822	0.00124948	0.0284225
ENSG00000179163.11.vs.ENSG00000188822.7	-0.0109661	-0.0797402	0.024165
ENSG00000179218.12.vs.ENSG00000179262.8	1.37441e-05	0.00575214	0.00646824
ENSG00000179277.9.vs.ENSG00000233090.1	-0.122968	0.398785	0.0369315
ENSG00000179299.15.vs.ENSG00000250906.1	-0.0109185	-1.31844	0.264442
ENSG00000179406.6.vs.ENSG00000251451.1	0.0128966	-0.201841	0.327243
ENSG00000179409.9.vs.ENSG00000167699.12	0.0218781	-0.016985	0.0447403
ENSG00000179456.10.vs.ENSG00000279774.1	-0.00449823	0.548378	0.0485881
ENSG00000179583.16.vs.ENSG00000280153.1	0.00267533	-0.161037	0.0509106
ENSG00000179598.5.vs.ENSG00000154803.11	0.0102454	-0.0137464	0.593566
ENSG00000179761.10.vs.ENSG00000265845.2	-0.00547821	-0.320049	0.832838
ENSG00000179761.10.vs.ENSG00000265908.1	-0.00527792	-0.300731	0.872363
ENSG00000179766.16.vs.ENSG00000198722.11	-0.0788743	-0.000156957	0.8511
ENSG00000179766.16.vs.ENSG00000198853.10	-0.106143	0.0109479	0.128582
ENSG00000179820.14.vs.ENSG00000126583.9	0.000452145	-0.280913	0.751695
ENSG00000179832.16.vs.ENSG00000235173.5	0.00338921	0.00510068	0.0132947
ENSG00000179832.16.vs.ENSG00000260428.2	0.00716994	0.00451649	0.0685496
ENSG00000179855.5.vs.ENSG00000064961.17	0.0288997	0.00198704	0.0153386
ENSG00000179922.5.vs.ENSG00000276488.1	0.0199015	-0.109822	0.753921
ENSG00000179934.6.vs.ENSG00000228168.1	0.31201	-0.346166	0.164111
ENSG00000179941.6.vs.ENSG00000091039.15	-0.0160115	0.000333038	0.608048
ENSG00000179965.10.vs.ENSG00000180035.9	0.0656024	-0.033131	0.112338
ENSG00000179979.8.vs.ENSG00000163945.14	0.00750528	0.0027236	0.822753
ENSG00000180098.8.vs.ENSG00000279443.1	0.00569572	0.0835696	0.398542
ENSG00000180190.10.vs.ENSG00000279852.1	-0.00204038	-0.363195	0.834999
ENSG00000180198.14.vs.ENSG00000204138.11	0.00310746	0.000124983	0.451271
ENSG00000180198.14.vs.ENSG00000279443.1	0.00204839	0.0672749	0.349904
ENSG00000180233.10.vs.ENSG00000235859.5	0.00438203	-0.0149184	0.747623
ENSG00000180370.9.vs.ENSG00000163964.12	0.00312039	-0.0127951	0.138338
ENSG00000180422.3.vs.ENSG00000129910.6	0.564888	-0.00447384	0.00650486
ENSG00000180422.3.vs.ENSG00000176715.14	0.509113	0.0106894	0.00419398
ENSG00000180432.5.vs.ENSG00000235288.2	0.0883921	-2.69197	0.591526
ENSG00000180532.9.vs.ENSG00000204519.9	-0.0225176	0.00144699	0.959694
ENSG00000180535.3.vs.ENSG00000164715.5	0.0731197	-0.00218533	0.40073
ENSG00000180806.4.vs.ENSG00000037965.5	0.0113641	0.0034516	0.713964
ENSG00000180834.6.vs.ENSG00000233885.6	-0.00487436	0.036179	0.950828
ENSG00000180869.4.vs.ENSG00000117155.15	-1.03268	-0.000839495	0.729846
ENSG00000180879.12.vs.ENSG00000184343.9	-5.29284e-05	0.0131211	0.389803
ENSG00000180884.9.vs.ENSG00000280106.1	0.00691379	0.0754144	0.0276807
ENSG00000180902.15.vs.ENSG00000168395.13	-0.00351255	0.00177506	0.914276
ENSG00000180914.9.vs.ENSG00000070950.8	-0.00596829	0.00261788	0.482637
ENSG00000180999.9.vs.ENSG00000197959.12	-0.0240565	0.0031683	0.957384
ENSG00000181007.8.vs.ENSG00000142065.12	0.0279848	0.00617502	0.104266
ENSG00000181045.13.vs.ENSG00000173821.18	-0.0086346	-0.00100525	0.102191
ENSG00000181135.14.vs.ENSG00000181085.13	0.0175314	-0.00280393	0.213225
ENSG00000181192.10.vs.ENSG00000065665.19	0.000788073	-0.008744	0.912957
ENSG00000181240.12.vs.ENSG00000125648.13	-1.49795	-0.000719191	0.0614897
ENSG00000181264.7.vs.ENSG00000196914.7	-0.0125009	-0.00154894	0.292249
ENSG00000181378.12.vs.ENSG00000163499.10	-0.0719272	-0.0320031	0.515328
ENSG00000181481.12.vs.ENSG00000266274.2	0.0089937	0.475159	0.0489911
ENSG00000181588.16.vs.ENSG00000071655.16	0.0110077	0.00581947	0.00462974
ENSG00000181588.16.vs.ENSG00000239367.2	0.0167551	-1.45191	0.0431482
ENSG00000181617.5.vs.ENSG00000171209.3	-5.61718e-06	0.00052	0.000802677
ENSG00000181652.17.vs.ENSG00000243433.1	0.0470453	-2.1912	1.7272e-07
ENSG00000181666.16.vs.ENSG00000189164.13	-0.0028621	0.0248283	0.883766
ENSG00000181798.2.vs.ENSG00000171596.6	-0.114937	0.081944	0.776888
ENSG00000181826.8.vs.ENSG00000248936.1	0.00748739	-0.911758	0.555843
ENSG00000181885.17.vs.ENSG00000175826.10	0.00269219	0.000142203	0.136949
ENSG00000181894.13.vs.ENSG00000121413.11	0.000312085	-0.00179088	0.941455
ENSG00000182004.11.vs.ENSG00000058673.14	0.00203635	0.000164746	0.7588
ENSG00000182022.16.vs.ENSG00000232334.1	-0.000684278	0.336558	0.883195
ENSG00000182048.10.vs.ENSG00000129744.2	0.729962	-0.165303	0.0502235
ENSG00000182057.4.vs.ENSG00000233903.2	-0.361755	0.0581126	0.666558
ENSG00000182057.4.vs.ENSG00000273366.1	-0.179536	-0.129387	0.614927
ENSG00000182162.8.vs.ENSG00000169093.13	-0.0144054	-0.00766682	0.335753
ENSG00000182218.8.vs.ENSG00000036530.7	0.0397682	0.0531315	0.00156763
ENSG00000182224.10.vs.ENSG00000167874.6	-0.136779	0.0280906	0.12213
ENSG00000182253.13.vs.ENSG00000261616.1	0.00116017	-0.11913	0.523602
ENSG00000182308.6.vs.ENSG00000014824.12	0.0291296	-0.00216047	0.79493
ENSG00000182318.5.vs.ENSG00000268895.4	0.130926	-0.339711	0.000369687
ENSG00000182318.5.vs.ENSG00000269794.1	0.0501074	-2.77894	0.260653
ENSG00000182318.5.vs.ENSG00000279611.1	0.0398333	-0.485939	0.452823
ENSG00000182327.7.vs.ENSG00000142507.8	-0.0568408	0.0016373	0.84572
ENSG00000182359.13.vs.ENSG00000254433.1	-0.0429133	-0.945463	0.152564
ENSG00000182379.9.vs.ENSG00000123384.12	0.00672904	0.000264001	0.2025
ENSG00000182379.9.vs.ENSG00000182199.9	0.00239422	0.00296757	0.0797331
ENSG00000182511.10.vs.ENSG00000196547.13	0.0134216	-0.000500065	0.427059
ENSG00000182747.4.vs.ENSG00000112357.11	0.225787	-0.0193227	0.152411
ENSG00000182809.9.vs.ENSG00000185347.16	-0.000490403	0.0161316	0.330775
ENSG00000182809.9.vs.ENSG00000213145.8	8.17094e-05	0.00318629	0.929119
ENSG00000182809.9.vs.ENSG00000257341.4	0.000510859	-2.13708	0.524034
ENSG00000182866.15.vs.ENSG00000183615.5	-0.0165895	0.0886383	0.00331626
ENSG00000182885.15.vs.ENSG00000205336.10	-0.508227	0.0020139	0.0242933
ENSG00000182986.11.vs.ENSG00000198538.9	0.000182973	-0.0034141	0.933769
ENSG00000182986.11.vs.ENSG00000204604.8	-0.00762582	0.00804682	0.754037
ENSG00000183019.6.vs.ENSG00000104918.6	-0.20377	0.190609	0.573184
ENSG00000183019.6.vs.ENSG00000181029.8	-0.149739	0.077117	0.373967
ENSG00000183044.10.vs.ENSG00000140650.10	-0.00555625	0.00962097	0.0165553
ENSG00000183044.10.vs.ENSG00000279357.1	-0.00554187	-0.484603	0.0216934
ENSG00000183248.10.vs.ENSG00000269153.1	-0.00229428	3.07938	0.269033
ENSG00000183423.10.vs.ENSG00000180245.4	-0.251245	0.433486	0.640941
ENSG00000183542.5.vs.ENSG00000205810.7	-0.105331	-0.14459	0.931105
ENSG00000183605.15.vs.ENSG00000165672.6	0.00411959	-0.0021863	0.477239
ENSG00000183624.12.vs.ENSG00000181789.13	-0.0093702	0.00134552	0.153391
ENSG00000183655.12.vs.ENSG00000259407.1	0.0103886	0.305384	0.267172
ENSG00000183655.12.vs.ENSG00000259416.2	0.0245588	-1.30719	0.268628
ENSG00000183655.12.vs.ENSG00000259762.1	0.0206496	-1.02973	0.388152
ENSG00000183668.16.vs.ENSG00000243137.6	0.0696731	-0.0926467	0.509425
ENSG00000183682.7.vs.ENSG00000127603.22	0.0733471	-0.000841158	0.444245
ENSG00000183763.7.vs.ENSG00000164076.15	-0.00627615	0.0529273	0.254479
ENSG00000183831.6.vs.ENSG00000162753.11	0.0281639	0.678298	0.101736
ENSG00000183844.15.vs.ENSG00000183486.11	0.00191288	-0.000698724	0.790327
ENSG00000183876.8.vs.ENSG00000070808.14	0.0385546	-0.309353	0.608064
ENSG00000183929.7.vs.ENSG00000206878.1	0.116574	-0.0228344	0.0105269
ENSG00000184047.14.vs.ENSG00000139719.8	0.0159834	0.00280317	0.761316
ENSG00000184058.11.vs.ENSG00000235776.2	0.00766407	0.105574	0.204811
ENSG00000184083.10.vs.ENSG00000196632.9	0.000890355	0.00757103	0.902
ENSG00000184106.7.vs.ENSG00000112195.8	0.273897	-0.275478	0.410627
ENSG00000184205.13.vs.ENSG00000184194.5	-0.0115726	0.00829618	0.416071
ENSG00000184208.10.vs.ENSG00000167077.11	0.00133034	-0.0373211	0.629176
ENSG00000184227.6.vs.ENSG00000258695.2	-0.0284709	-0.76768	0.423655
ENSG00000184305.13.vs.ENSG00000279013.1	0.048363	-0.176189	0.072886
ENSG00000184313.18.vs.ENSG00000162390.16	-0.0383851	-0.00979664	0.920163
ENSG00000184313.18.vs.ENSG00000243725.5	-0.0952974	0.0960642	0.458219
ENSG00000184361.11.vs.ENSG00000006062.12	0.708373	-0.0240188	0.0597557
ENSG00000184389.9.vs.ENSG00000134686.15	-0.109801	0.00495974	0.153455
ENSG00000184492.6.vs.ENSG00000136682.13	0.533794	-0.0284154	0.394419
ENSG00000184574.8.vs.ENSG00000111644.6	0.00175901	-0.156917	0.293868
ENSG00000184634.14.vs.ENSG00000196338.11	0.00234964	-0.205759	0.385701
ENSG00000184635.12.vs.ENSG00000256771.2	0.000936088	-0.0156879	0.64444
ENSG00000184697.6.vs.ENSG00000162069.13	0.00112845	-0.00293532	0.813325
ENSG00000184898.6.vs.ENSG00000123609.9	-0.0193616	-0.000517531	0.385103
ENSG00000184916.7.vs.ENSG00000183828.13	0.0174371	-0.0264978	0.000992883
ENSG00000184979.9.vs.ENSG00000183785.13	-0.0107048	1.06481	0.0641773
ENSG00000185000.8.vs.ENSG00000261678.2	0.00551294	0.0530316	0.00156482
ENSG00000185013.15.vs.ENSG00000240857.1	0.143832	0.000744228	0.888757
ENSG00000185019.15.vs.ENSG00000088899.13	0.00483156	0.00836676	0.0551074
ENSG00000185028.3.vs.ENSG00000153404.12	-0.00346031	0.00779846	0.0867674
ENSG00000185038.13.vs.ENSG00000167165.17	0.193695	0.00728913	0.000160082
ENSG00000185038.13.vs.ENSG00000244122.2	0.194095	-0.260676	0.000133148
ENSG00000185090.13.vs.ENSG00000197982.13	0.00487377	0.00250006	0.251844
ENSG00000185100.9.vs.ENSG00000184990.11	-0.00783518	0.00539659	0.414439
ENSG00000185156.5.vs.ENSG00000276231.3	-0.0117045	0.0816791	0.116452
ENSG00000185168.5.vs.ENSG00000157637.11	0.00747726	0.000429872	0.87761
ENSG00000185168.5.vs.ENSG00000185332.5	0.00709374	0.0260063	0.783933
ENSG00000185189.14.vs.ENSG00000179950.12	-0.00325996	0.00259171	0.00295775
ENSG00000185201.15.vs.ENSG00000251661.3	-0.00124885	-0.141758	0.412281
ENSG00000185269.10.vs.ENSG00000185105.4	0.0359994	0.1224	0.00121139
ENSG00000185294.6.vs.ENSG00000120088.13	-2.66547	0.0115116	0.068532
ENSG00000185418.14.vs.ENSG00000184277.11	0.00613482	-0.0105645	0.59124
ENSG00000185485.13.vs.ENSG00000260261.1	-0.00546693	-0.00325836	0.981808
ENSG00000185504.15.vs.ENSG00000182446.12	-0.00277995	0.000320174	0.880945
ENSG00000185513.13.vs.ENSG00000101049.13	-0.0244641	-0.03555	0.511898
ENSG00000185527.10.vs.ENSG00000182446.12	-0.147567	-0.000138095	0.517895
ENSG00000185585.18.vs.ENSG00000236643.1	0.00455498	-0.784243	0.367478
ENSG00000185591.8.vs.ENSG00000135409.9	-0.00226781	0.128753	0.623634
ENSG00000185624.13.vs.ENSG00000141522.10	4.83047e-05	-5.26687e-05	0.970599
ENSG00000185624.13.vs.ENSG00000182676.4	5.29234e-05	-0.920831	0.582559
ENSG00000185624.13.vs.ENSG00000225663.6	1.28255e-05	0.000895518	0.884489
ENSG00000185633.9.vs.ENSG00000185482.6	0.00246152	-0.00399806	0.206834
ENSG00000185633.9.vs.ENSG00000258830.1	0.00240597	1.03798	0.0862922
ENSG00000185640.5.vs.ENSG00000170423.11	0.00071552	0.0225575	0.743986
ENSG00000185640.5.vs.ENSG00000170477.11	0.00105581	-0.00166569	0.738615
ENSG00000185862.6.vs.ENSG00000126860.10	-0.0301399	0.0502788	0.158142
ENSG00000185862.6.vs.ENSG00000126861.4	-0.00904049	0.0270835	0.416701
ENSG00000185885.14.vs.ENSG00000251661.3	-0.000659709	-0.144906	0.33066
ENSG00000185900.8.vs.ENSG00000168522.11	0.00690301	0.00478448	0.00589137
ENSG00000186026.6.vs.ENSG00000267680.4	0.0707719	-0.0733378	0.151158
ENSG00000186111.7.vs.ENSG00000105298.12	-0.00527376	0.02147	0.384566
ENSG00000186115.11.vs.ENSG00000267218.2	-0.925504	-0.753164	0.620264
ENSG00000186130.4.vs.ENSG00000056586.14	-0.00305933	0.00598583	0.187572
ENSG00000186130.4.vs.ENSG00000171448.8	0.0297292	-0.042837	0.129825
ENSG00000186150.4.vs.ENSG00000258673.1	0.293866	0.233528	0.285894
ENSG00000186188.9.vs.ENSG00000095464.9	-0.232994	-0.72023	0.07287
ENSG00000186204.13.vs.ENSG00000186529.13	-0.10102	0.0147042	0.187699
ENSG00000186205.11.vs.ENSG00000117791.14	0.0170138	-0.020932	0.0203913
ENSG00000186230.6.vs.ENSG00000276449.1	-0.0314638	0.153397	0.506335
ENSG00000186272.11.vs.ENSG00000188785.10	-0.0293762	-0.0113279	0.494644
ENSG00000186300.10.vs.ENSG00000172000.6	-0.0366311	0.137134	0.00343977
ENSG00000186300.10.vs.ENSG00000172006.10	0.00747203	-0.0735789	0.341203
ENSG00000186369.8.vs.ENSG00000139973.14	-0.0178435	0.0514087	0.515632
ENSG00000186399.10.vs.ENSG00000166664.12	-0.728398	-0.841478	0.321252
ENSG00000186409.13.vs.ENSG00000171960.9	-0.0997456	0.00291675	0.00756541
ENSG00000186431.17.vs.ENSG00000167633.15	-0.135426	-0.0722218	0.915435
ENSG00000186431.17.vs.ENSG00000240403.4	-0.107084	-0.680066	0.683382
ENSG00000186446.10.vs.ENSG00000196653.10	0.0186404	0.0153728	0.724341
ENSG00000186481.14.vs.ENSG00000264222.1	0.00195221	-0.067569	0.974935
ENSG00000186501.13.vs.ENSG00000142765.16	-0.00514032	0.00257063	0.803008
ENSG00000186517.12.vs.ENSG00000215845.9	-0.00823236	-0.00288383	0.208125
ENSG00000186517.12.vs.ENSG00000270149.4	-0.0066302	-0.0966289	0.38448
ENSG00000186625.12.vs.ENSG00000233330.1	0.0119938	0.0231449	0.530086
ENSG00000186625.12.vs.ENSG00000281021.1	0.0123065	-0.152773	0.501693
ENSG00000186714.11.vs.ENSG00000270903.1	0.113452	-0.856972	0.286223
ENSG00000186732.12.vs.ENSG00000223843.4	-0.0064338	-1.55469	0.278111
ENSG00000186777.10.vs.ENSG00000251188.1	0.161453	0.115362	0.108496
ENSG00000186806.5.vs.ENSG00000105379.8	0.00694368	0.00466167	0.0381578
ENSG00000186827.9.vs.ENSG00000186891.12	0.0401047	0.000427861	0.233348
ENSG00000186842.4.vs.ENSG00000265590.8	0.661684	0.428786	0.268018
ENSG00000186868.14.vs.ENSG00000262372.1	-0.00128584	0.015719	0.316593
ENSG00000186897.4.vs.ENSG00000258334.1	0.0315748	-0.178157	0.427311
ENSG00000186910.3.vs.ENSG00000170054.13	-0.00491632	0.0397229	0.561199
ENSG00000186998.14.vs.ENSG00000237015.1	0.00725947	-0.522319	0.370226
ENSG00000187024.12.vs.ENSG00000160404.16	1.46609	0.000412097	0.0786002
ENSG00000187164.16.vs.ENSG00000148704.11	-0.00618897	-0.187474	0.0688339
ENSG00000187187.12.vs.ENSG00000013275.6	-0.0556016	0.00159365	0.312698
ENSG00000187239.15.vs.ENSG00000224988.1	-0.00349926	3.19229	0.0921305
ENSG00000187244.9.vs.ENSG00000142273.9	-0.000450826	0.0089199	0.377077
ENSG00000187486.5.vs.ENSG00000006071.10	-0.0304163	0.00832666	0.0163936
ENSG00000187492.7.vs.ENSG00000176095.10	-0.126003	-0.00225975	0.548729
ENSG00000187492.7.vs.ENSG00000182179.9	-0.110594	-0.00766301	0.135293
ENSG00000187621.13.vs.ENSG00000213231.11	0.0650579	0.0562957	0.0100177
ENSG00000187682.1.vs.ENSG00000094631.17	-0.807433	-0.00189071	0.801299
ENSG00000187742.13.vs.ENSG00000265112.1	0.00058045	-0.374527	0.892421
ENSG00000187800.12.vs.ENSG00000160838.12	0.000872804	-0.0362904	0.953798
ENSG00000187801.13.vs.ENSG00000279667.1	0.0633211	-0.482491	0.389064
ENSG00000187815.8.vs.ENSG00000279667.1	-0.0870524	0.329002	0.263428
ENSG00000187922.12.vs.ENSG00000233016.5	-0.293035	0.00566385	0.223737
ENSG00000187944.2.vs.ENSG00000119041.9	-0.589465	0.00460034	0.662921
ENSG00000187950.7.vs.ENSG00000133687.14	-0.0270655	0.00489769	0.0421063
ENSG00000187951.9.vs.ENSG00000261794.1	0.0378607	-0.775165	0.100047
ENSG00000188033.8.vs.ENSG00000178464.6	0.090382	0.069334	0.024205
ENSG00000188033.8.vs.ENSG00000269242.1	0.0821371	-0.0178303	0.0612938
ENSG00000188086.11.vs.ENSG00000261603.1	-0.061189	-0.711637	0.370451
ENSG00000188130.12.vs.ENSG00000185386.13	0.0117952	0.0152856	0.00137245
ENSG00000188158.13.vs.ENSG00000047634.13	-0.0153703	-0.0318794	0.0833084
ENSG00000188163.7.vs.ENSG00000275549.1	0.249945	0.0304989	0.736752
ENSG00000188211.7.vs.ENSG00000260196.1	0.0101025	-0.0503694	0.749881
ENSG00000188229.5.vs.ENSG00000197768.9	0.000907384	0.0933425	0.207921
ENSG00000188266.12.vs.ENSG00000041357.14	-0.019332	0.00259388	0.299737
ENSG00000188266.12.vs.ENSG00000136381.11	-0.0113088	0.00589635	0.258513
ENSG00000188313.11.vs.ENSG00000279320.1	-0.00344469	0.164397	0.624256
ENSG00000188338.13.vs.ENSG00000114353.15	0.00916477	-0.00110747	0.0389447
ENSG00000188343.11.vs.ENSG00000279331.1	0.0126212	-0.0464411	0.402838
ENSG00000188486.3.vs.ENSG00000172269.15	0.00554356	0.00273119	0.0768563
ENSG00000188643.9.vs.ENSG00000189334.7	0.00182687	-0.000540515	0.00114319
ENSG00000188662.6.vs.ENSG00000108821.12	-0.0720041	1.11688e-05	0.561754
ENSG00000188706.11.vs.ENSG00000275070.1	0.00295289	-1.19735	0.416196
ENSG00000188710.2.vs.ENSG00000130720.11	0.278015	0.0249005	3.93854e-06
ENSG00000188739.13.vs.ENSG00000207181.1	0.0886286	-0.000610606	0.266806
ENSG00000188786.9.vs.ENSG00000196449.3	0.00127785	0.0193658	0.0989484
ENSG00000188786.9.vs.ENSG00000204084.11	0.0101171	-0.0114268	0.558924
ENSG00000188807.11.vs.ENSG00000171612.6	0.0141298	-0.0161842	0.32725
ENSG00000188886.3.vs.ENSG00000274286.1	-0.397045	0.0709974	0.0927571
ENSG00000188895.10.vs.ENSG00000108349.13	-0.00293767	0.00187232	0.375017
ENSG00000188910.7.vs.ENSG00000187513.8	0.010268	0.0134425	0.0445674
ENSG00000188933.13.vs.ENSG00000170160.15	-0.067737	0.077791	0.0143233
ENSG00000188938.14.vs.ENSG00000227603.1	-0.00463098	-0.146945	0.278395
ENSG00000189051.5.vs.ENSG00000161970.11	0.112636	-0.000235324	0.108181
ENSG00000189051.5.vs.ENSG00000263809.1	0.119557	-0.553812	0.0939353
ENSG00000189120.4.vs.ENSG00000141295.12	0.0079228	-0.00168669	0.243134
ENSG00000189223.12.vs.ENSG00000125637.14	0.0126197	-0.00545314	0.0838232
ENSG00000189319.12.vs.ENSG00000203791.12	0.00743158	-0.0166458	0.103274
[truncated: 1,778 more rows]

## Sheet: BG.DFI.COAD
Gene	Coefficient1	Coefficient2	Logrank p-value
ENSG00000000460.15.vs.ENSG00000239494.2	-0.038057	-1.73586	0.572151
ENSG00000000938.11.vs.ENSG00000126705.12	-0.0355811	0.0150391	0.554729
ENSG00000003393.13.vs.ENSG00000082126.16	0.0225754	-3.6523	0.54654
ENSG00000003400.13.vs.ENSG00000064012.20	-0.0480245	0.0110363	0.0281868
ENSG00000003402.18.vs.ENSG00000003400.13	0.00158645	-0.0448094	0.0328495
ENSG00000003989.15.vs.ENSG00000104213.11	0.00972944	-0.0151016	0.937203
ENSG00000004838.12.vs.ENSG00000126062.3	-0.809621	0.0140425	0.463598
ENSG00000004975.10.vs.ENSG00000132535.17	0.0089648	0.0117927	0.832137
ENSG00000004975.10.vs.ENSG00000175826.10	0.0326095	-0.0162705	0.138673
ENSG00000004975.10.vs.ENSG00000199053.2	0.0101052	-0.286533	0.825783
ENSG00000005059.14.vs.ENSG00000273447.1	-0.0525019	-0.129161	0.143681
ENSG00000005075.14.vs.ENSG00000170667.13	0.0039183	4.77008	0.0282591
ENSG00000005189.18.vs.ENSG00000005187.10	0.130317	-0.0121036	0.0901395
ENSG00000005249.11.vs.ENSG00000105856.12	-0.132997	-0.0135011	0.0376727
ENSG00000005379.14.vs.ENSG00000265206.3	0.00677279	0.0381511	0.412639
ENSG00000005486.15.vs.ENSG00000219039.2	0.00162294	-0.738178	0.860321
ENSG00000005961.16.vs.ENSG00000161682.13	0.0794775	-0.0644664	0.916484
ENSG00000005961.16.vs.ENSG00000186566.10	0.0787059	0.000140113	0.963112
ENSG00000006282.18.vs.ENSG00000006283.16	0.00598987	0.198719	0.262193
ENSG00000006283.16.vs.ENSG00000108846.14	0.196031	0.00246485	0.479207
ENSG00000006607.12.vs.ENSG00000168385.16	-0.00403482	-0.00183941	0.59975
ENSG00000006744.17.vs.ENSG00000277621.1	-0.00119797	-1.64122	0.862953
ENSG00000007038.9.vs.ENSG00000162078.10	0.0150661	-0.00173788	0.360265
ENSG00000007047.13.vs.ENSG00000104859.13	-0.0102848	0.0137345	0.584322
ENSG00000007216.13.vs.ENSG00000109101.6	0.000354222	-0.542149	0.60544
ENSG00000007216.13.vs.ENSG00000263266.2	0.00666032	-0.0481197	0.258365
ENSG00000007237.17.vs.ENSG00000109047.7	-0.007291	-0.412082	0.807261
ENSG00000007264.12.vs.ENSG00000105278.9	0.0374211	-0.0846892	0.825628
ENSG00000007312.11.vs.ENSG00000007314.10	-0.0759489	0.724766	0.073105
ENSG00000007341.17.vs.ENSG00000235299.2	-0.0209987	-11.8764	0.559194
ENSG00000007341.17.vs.ENSG00000273483.1	-0.0612886	2.2272	0.159496
ENSG00000007516.12.vs.ENSG00000219274.1	0.0158585	-11.2584	0.0969473
ENSG00000008056.11.vs.ENSG00000126759.11	0.0980698	-0.148942	0.341106
ENSG00000008516.15.vs.ENSG00000205890.3	-0.259646	0.112355	0.097877
ENSG00000008517.15.vs.ENSG00000008516.15	0.00193171	-0.292146	0.318806
ENSG00000009724.15.vs.ENSG00000116649.8	-0.337504	-0.00758567	0.215935
ENSG00000010256.9.vs.ENSG00000183396.3	-0.000885526	0.744954	0.411596
ENSG00000010327.9.vs.ENSG00000010322.14	-0.0133291	0.0212746	0.0481553
ENSG00000010379.14.vs.ENSG00000111181.11	0.0606101	0.0570422	0.920052
ENSG00000010610.8.vs.ENSG00000110811.18	-0.0222919	0.00994893	0.180293
ENSG00000010626.13.vs.ENSG00000111669.13	-0.00478621	-0.000709196	0.566279
ENSG00000010704.17.vs.ENSG00000197061.4	-0.0432382	-0.797736	0.481793
ENSG00000011143.15.vs.ENSG00000278627.1	0.0718257	-2.11174	0.225645
ENSG00000011451.16.vs.ENSG00000105122.11	0.00619168	-0.0850294	0.265368
ENSG00000011523.12.vs.ENSG00000232613.5	0.0148997	-1.07069	0.471475
ENSG00000012061.14.vs.ENSG00000125744.10	-0.0232903	0.0623879	0.0563904
ENSG00000012211.11.vs.ENSG00000279422.1	-0.000193766	-4.36475	0.881721
ENSG00000012504.12.vs.ENSG00000139354.9	0.0208825	-0.0269866	0.543032
ENSG00000013306.14.vs.ENSG00000267750.4	-0.000896192	0.848893	0.403999
ENSG00000013561.16.vs.ENSG00000271871.1	-0.0108368	-0.473457	0.690737
ENSG00000013588.5.vs.ENSG00000247498.8	0.000105158	-0.0147874	0.969484
ENSG00000015285.9.vs.ENSG00000101945.15	-0.0682315	-0.0165373	0.261233
ENSG00000015676.16.vs.ENSG00000279853.1	0.00403614	3.82241	0.0348978
ENSG00000016864.15.vs.ENSG00000114904.11	-0.012119	-0.0131428	0.714189
ENSG00000017483.13.vs.ENSG00000226971.1	-0.00426911	-3.2838	0.345578
ENSG00000018408.13.vs.ENSG00000114744.7	0.00108137	-0.025297	0.533742
ENSG00000018625.13.vs.ENSG00000132681.15	0.0271243	-1.60509	0.445033
ENSG00000019102.10.vs.ENSG00000255045.1	-0.00116433	-0.149631	0.960844
ENSG00000019995.6.vs.ENSG00000273599.1	-0.00427473	0.0560211	0.442636
ENSG00000021762.18.vs.ENSG00000236710.1	0.00533829	-1.7695	0.788527
ENSG00000021776.9.vs.ENSG00000259751.1	-0.00740143	-5.68835	0.243112
ENSG00000022277.11.vs.ENSG00000087589.15	0.00202331	-0.273813	0.301271
ENSG00000022277.11.vs.ENSG00000280387.1	0.00372327	0.147717	0.58876
ENSG00000022556.14.vs.ENSG00000267265.4	-0.0533935	-0.000345357	0.299201
ENSG00000023330.13.vs.ENSG00000242849.2	0.00466494	-0.88992	0.475912
ENSG00000023572.7.vs.ENSG00000272579.1	-0.0697876	0.00801609	0.466998
ENSG00000023608.4.vs.ENSG00000279633.1	-0.0396057	-2.81502	0.649959
ENSG00000024422.10.vs.ENSG00000105373.17	-0.00171662	9.29836e-05	0.922012
ENSG00000027847.12.vs.ENSG00000184840.10	-0.00783861	0.00285348	0.648961
ENSG00000029993.13.vs.ENSG00000230508.1	0.00697032	-0.628084	0.0821287
ENSG00000033867.15.vs.ENSG00000163491.15	-0.0213693	0.24611	0.528905
ENSG00000034510.5.vs.ENSG00000213399.3	-9.18828e-05	-0.502319	0.481925
ENSG00000035862.11.vs.ENSG00000267355.2	-0.000441897	0.620113	0.716035
ENSG00000037280.14.vs.ENSG00000161055.3	0.00204861	-0.0260714	0.990866
ENSG00000038532.13.vs.ENSG00000280153.1	0.03521	-0.110221	0.118232
ENSG00000039068.17.vs.ENSG00000103047.6	0.00159084	-0.0103524	0.147728
ENSG00000039987.5.vs.ENSG00000198356.10	0.0308679	-0.0106528	0.195761
ENSG00000040633.11.vs.ENSG00000175826.10	0.00721291	-0.0103298	0.480383
ENSG00000041357.14.vs.ENSG00000279373.1	-0.00210071	-4.79356	0.465117
ENSG00000042062.10.vs.ENSG00000232043.1	-0.159269	-0.0338106	0.457261
ENSG00000043143.19.vs.ENSG00000240250.3	0.0059059	1.04809	0.55971
ENSG00000044090.7.vs.ENSG00000272223.1	0.0148465	1.83792	0.00215831
ENSG00000044446.10.vs.ENSG00000173698.16	0.0130892	-0.179469	0.348169
ENSG00000048544.5.vs.ENSG00000124496.11	-0.00785676	-0.0147777	0.696419
ENSG00000049245.11.vs.ENSG00000049246.13	-0.0224535	0.0211293	0.00380967
ENSG00000050405.12.vs.ENSG00000139624.11	-0.00359863	-0.016646	0.388008
ENSG00000050555.16.vs.ENSG00000126878.11	-0.0522931	0.00636227	0.72319
ENSG00000051382.7.vs.ENSG00000174715.7	0.00794824	-3.06862	0.578201
ENSG00000053438.8.vs.ENSG00000235044.1	0.0556733	-0.392715	0.557123
ENSG00000053501.11.vs.ENSG00000099330.7	0.00963789	-0.0567582	0.35205
ENSG00000054118.12.vs.ENSG00000214193.8	-0.00205176	0.0114057	0.70921
ENSG00000054179.10.vs.ENSG00000186193.8	0.00815294	-0.00131688	0.492094
ENSG00000054967.11.vs.ENSG00000110237.3	-0.0455377	0.0142605	0.304584
ENSG00000054967.11.vs.ENSG00000256448.4	-0.0143251	-2.58057	0.695977
ENSG00000055211.11.vs.ENSG00000202343.1	-0.0120628	-0.912902	0.656176
ENSG00000055211.11.vs.ENSG00000220848.4	-0.0195187	-0.46861	0.180572
ENSG00000055483.18.vs.ENSG00000267355.2	0.00916114	0.28983	0.448329
ENSG00000055917.14.vs.ENSG00000235411.1	0.000831287	-0.595138	0.921034
ENSG00000055957.9.vs.ENSG00000162267.11	-0.00170423	0.0035785	0.999865
ENSG00000056558.9.vs.ENSG00000119403.12	0.023019	-0.00869026	0.471336
ENSG00000057468.6.vs.ENSG00000137955.14	-1.41891	0.00546007	0.374373
ENSG00000057593.12.vs.ENSG00000126217.19	-0.0400004	0.0132232	0.00550953
ENSG00000057593.12.vs.ENSG00000126218.10	-0.136257	0.0660078	0.0340159
ENSG00000057593.12.vs.ENSG00000230371.1	-0.0156978	1.7756	0.603047
ENSG00000058453.15.vs.ENSG00000226526.1	-0.00329897	-14.123	0.626505
ENSG00000058600.14.vs.ENSG00000103319.10	0.0227794	0.0178939	0.000517
ENSG00000059145.17.vs.ENSG00000260425.1	0.00454842	2.66825	0.104792
ENSG00000059573.7.vs.ENSG00000119977.19	0.00734324	-0.0330058	0.122661
ENSG00000060558.3.vs.ENSG00000125910.5	-0.0679842	-0.0584394	0.0952102
ENSG00000060558.3.vs.ENSG00000266944.1	-0.0770201	-2.22117	0.0627157
ENSG00000061273.16.vs.ENSG00000111424.9	0.00677022	0.00221753	0.608146
ENSG00000062524.14.vs.ENSG00000103932.10	0.0374794	0.00307248	0.274664
ENSG00000063015.18.vs.ENSG00000109118.12	-0.305396	0.0198824	0.517324
ENSG00000064313.10.vs.ENSG00000279347.1	-0.0100059	0.223495	0.723161
ENSG00000064547.12.vs.ENSG00000105717.12	0.00730844	0.000185829	0.853144
ENSG00000064601.15.vs.ENSG00000168612.4	-0.00315607	0.0378323	0.1661
ENSG00000064687.11.vs.ENSG00000064666.13	0.0074037	-0.00197567	0.655924
ENSG00000064999.13.vs.ENSG00000065060.15	0.0124131	-0.00663261	0.643092
ENSG00000065029.13.vs.ENSG00000023892.10	0.0111678	0.0208771	0.268777
ENSG00000065029.13.vs.ENSG00000146197.8	0.0141361	0.0083045	0.546012
ENSG00000065371.16.vs.ENSG00000175455.13	-0.372132	0.00248926	0.842422
ENSG00000065717.13.vs.ENSG00000104964.13	0.00633897	-0.00150559	0.119459
ENSG00000065978.16.vs.ENSG00000171960.9	0.000657074	-0.011336	0.809892
ENSG00000066117.13.vs.ENSG00000110881.10	0.0248581	-0.00455215	0.0583614
ENSG00000066117.13.vs.ENSG00000167588.11	0.0234963	0.0042378	0.0548098
ENSG00000066336.10.vs.ENSG00000134571.9	-0.0175896	0.217644	0.605608
ENSG00000066336.10.vs.ENSG00000255197.4	-0.00346376	-0.482487	0.568174
ENSG00000067334.12.vs.ENSG00000023909.8	0.00948348	-0.0164713	0.759211
ENSG00000067596.9.vs.ENSG00000237888.1	0.00219793	-4.87284	0.257274
ENSG00000067840.11.vs.ENSG00000067829.17	0.0980828	0.00105204	0.547694
ENSG00000067900.6.vs.ENSG00000244527.1	-0.0140496	1.06466	0.452562
ENSG00000068001.12.vs.ENSG00000114378.15	0.00262849	-0.0272288	0.322824
ENSG00000068137.13.vs.ENSG00000184451.5	0.015641	0.0765657	0.427861
ENSG00000068308.12.vs.ENSG00000102096.9	0.0119081	-0.0344703	0.029157
ENSG00000068724.14.vs.ENSG00000228925.1	0.00795736	0.173295	0.721746
ENSG00000069956.10.vs.ENSG00000138594.11	-0.0122959	0.00312401	0.594758
ENSG00000070444.13.vs.ENSG00000127804.11	0.00610333	0.00987658	0.810356
ENSG00000070444.13.vs.ENSG00000263345.1	0.00559515	0.288291	0.727069
ENSG00000070476.13.vs.ENSG00000159650.7	0.0222447	0.159337	0.564116
ENSG00000070476.13.vs.ENSG00000279328.1	0.0219116	0.109098	0.616104
ENSG00000070785.15.vs.ENSG00000226499.1	0.00888956	-4.75751	0.263028
ENSG00000070785.15.vs.ENSG00000232369.1	0.00239694	-1.85004	0.809949
ENSG00000070785.15.vs.ENSG00000268949.1	-0.00206582	1.33722	0.711412
ENSG00000071859.13.vs.ENSG00000130827.6	-0.00216482	0.00972983	0.155531
ENSG00000072062.12.vs.ENSG00000188032.8	-0.00373537	-1.62624	0.767031
ENSG00000072195.13.vs.ENSG00000280323.1	0.0543268	-1.00462	0.251888
ENSG00000072832.13.vs.ENSG00000181215.11	0.0393998	-1.81771	0.655612
ENSG00000072858.9.vs.ENSG00000241529.3	-0.0272182	-7.30884	0.372314
ENSG00000073008.13.vs.ENSG00000216588.7	0.00753313	0.301999	0.0549749
ENSG00000073150.12.vs.ENSG00000073146.14	-0.733963	0.235885	0.527262
ENSG00000073150.12.vs.ENSG00000170638.8	-0.667032	0.000551818	0.514445
ENSG00000073670.12.vs.ENSG00000161692.16	-0.412613	0.0570641	0.0576146
ENSG00000073737.15.vs.ENSG00000235321.1	-0.0112618	7.21308	0.414998
ENSG00000074266.16.vs.ENSG00000254783.1	0.00677357	-0.848074	0.728787
ENSG00000074319.11.vs.ENSG00000151116.15	0.0108946	-0.00764816	0.340113
ENSG00000074660.14.vs.ENSG00000167703.13	-0.0522343	0.0117855	0.346626
ENSG00000076067.10.vs.ENSG00000257576.1	-0.0295649	-0.538127	0.128288
ENSG00000076108.10.vs.ENSG00000207031.1	0.00509944	-0.791118	0.45889
ENSG00000076248.9.vs.ENSG00000076555.14	-0.00352872	0.0377165	0.0784895
ENSG00000076248.9.vs.ENSG00000135093.11	-0.00785388	-0.00751029	0.498953
ENSG00000076258.8.vs.ENSG00000225704.2	0.0294635	1.80567	0.593711
ENSG00000076321.9.vs.ENSG00000200674.1	-0.0265071	-7.85711	0.381523
ENSG00000076650.5.vs.ENSG00000166359.9	0.0660681	0.486841	0.0693398
ENSG00000076864.18.vs.ENSG00000090686.14	-9.82237e-05	-0.0200036	0.367682
ENSG00000077147.13.vs.ENSG00000095587.8	-0.000591664	0.0503553	0.851606
ENSG00000077147.13.vs.ENSG00000155629.13	-0.000388099	-0.00238192	0.932257
ENSG00000077454.14.vs.ENSG00000224729.5	0.0266856	-0.728825	0.722818
ENSG00000077713.17.vs.ENSG00000252147.1	0.0158748	5.47856	0.00134701
ENSG00000078081.6.vs.ENSG00000078070.10	-0.0271798	0.0132096	0.585512
ENSG00000078747.11.vs.ENSG00000125971.15	-0.000229243	0.000781016	0.946283
ENSG00000079246.14.vs.ENSG00000279348.1	0.000483193	-0.00337661	0.954871
ENSG00000079337.14.vs.ENSG00000280054.1	0.00173926	-0.884809	0.777545
ENSG00000079432.6.vs.ENSG00000188368.8	0.00417059	-0.136551	0.780165
ENSG00000079459.11.vs.ENSG00000227203.3	1.59442e-05	-2.12013	0.311958
ENSG00000079616.11.vs.ENSG00000174992.7	0.0109508	0.00115564	0.111043
ENSG00000079805.15.vs.ENSG00000267544.1	-0.000683474	0.56951	0.844154
ENSG00000079999.12.vs.ENSG00000180739.13	-0.000651728	0.0856405	0.964034
ENSG00000080644.14.vs.ENSG00000117971.10	0.0163059	0.107093	0.891517
ENSG00000080644.14.vs.ENSG00000261762.1	0.0195112	-0.273755	0.459165
ENSG00000080854.13.vs.ENSG00000280237.1	-0.118982	0.124349	0.04809
ENSG00000081051.6.vs.ENSG00000163631.15	-0.0586389	0.0395787	0.0284458
ENSG00000081154.10.vs.ENSG00000174173.6	0.0055354	-0.026726	0.420175
ENSG00000081181.6.vs.ENSG00000259502.1	-0.0707803	1.59011	0.433045
ENSG00000081692.11.vs.ENSG00000230005.2	-0.0283847	-2.87939	0.526653
ENSG00000081818.3.vs.ENSG00000113209.8	0.174787	-0.365455	0.506189
ENSG00000082126.16.vs.ENSG00000155755.17	-2.43917	-0.0280941	0.423751
ENSG00000082781.10.vs.ENSG00000173702.6	0.00241428	-0.000420554	0.615157
ENSG00000083099.9.vs.ENSG00000112159.10	-0.0212623	0.00154124	0.542441
ENSG00000083223.16.vs.ENSG00000135070.12	-0.00460459	-0.0435455	0.153499
ENSG00000083444.15.vs.ENSG00000116688.15	0.00274486	-0.00798701	0.516059
ENSG00000083807.8.vs.ENSG00000119574.11	-0.0381361	0.0140826	0.441348
ENSG00000083812.10.vs.ENSG00000249471.6	0.0430394	-0.0803954	0.887616
ENSG00000083844.9.vs.ENSG00000105146.11	-0.0121117	-0.0362021	0.7487
ENSG00000083845.7.vs.ENSG00000171574.16	-0.00019344	-0.0808696	0.286042
ENSG00000083845.7.vs.ENSG00000269855.2	-0.000305649	1.436	0.248386
ENSG00000084652.14.vs.ENSG00000025800.12	-0.00638069	-0.00492975	0.526705
ENSG00000084652.14.vs.ENSG00000160050.13	-0.0119228	0.0705422	0.423549
ENSG00000084693.14.vs.ENSG00000138080.12	0.00912959	0.000271669	0.872272
ENSG00000085063.13.vs.ENSG00000255202.1	-0.00274276	-5.94435	0.460319
ENSG00000085433.14.vs.ENSG00000274068.1	-0.0357287	-3.44523	0.759182
ENSG00000085644.12.vs.ENSG00000228146.5	-0.00109251	-0.167087	0.900143
ENSG00000085831.14.vs.ENSG00000085832.15	0.00418978	-0.0192099	0.200598
ENSG00000085978.20.vs.ENSG00000263941.2	-0.00453453	2.83991	0.749653
ENSG00000086015.19.vs.ENSG00000236111.5	0.00487671	-0.728601	0.69971
ENSG00000086159.11.vs.ENSG00000167580.6	-0.0266396	0.952714	0.275045
ENSG00000086506.2.vs.ENSG00000188536.11	0.418975	0.047123	0.0042091
ENSG00000086730.15.vs.ENSG00000207741.1	-0.02035	-0.34638	0.863781
ENSG00000086848.13.vs.ENSG00000255561.5	0.0492671	-0.898242	0.0148748
ENSG00000086967.9.vs.ENSG00000269404.5	0.57252	-0.0511839	0.361221
ENSG00000087077.10.vs.ENSG00000087087.17	0.00127974	0.0046098	0.536316
ENSG00000087088.18.vs.ENSG00000087086.12	-0.00204921	-5.87963e-05	0.820607
ENSG00000087088.18.vs.ENSG00000104808.6	-0.00246665	0.00804639	0.866818
ENSG00000087111.19.vs.ENSG00000109107.12	-0.00295955	-9.3851e-05	0.953238
ENSG00000087245.11.vs.ENSG00000087253.10	-0.000602789	0.00585365	0.431849
ENSG00000087266.14.vs.ENSG00000087274.15	-0.010919	0.00118086	0.630044
ENSG00000087338.4.vs.ENSG00000196975.13	-0.0238126	0.000979963	0.510833
ENSG00000087502.16.vs.ENSG00000273680.1	-0.00748712	-0.64631	0.501032
ENSG00000087502.16.vs.ENSG00000274315.1	-0.0128186	-0.103546	0.626987
ENSG00000088247.14.vs.ENSG00000181240.12	0.00201985	0.0853829	0.730723
ENSG00000088256.7.vs.ENSG00000266944.1	-0.00269426	-2.50076	0.462674
ENSG00000088280.17.vs.ENSG00000204219.8	-0.0471573	0.00160336	0.467395
ENSG00000088367.19.vs.ENSG00000131043.10	0.00287462	0.00756279	0.263082
ENSG00000088826.16.vs.ENSG00000230176.2	0.0247367	1.23934	0.0120889
ENSG00000088827.11.vs.ENSG00000149451.16	-0.0300106	0.126954	0.0982731
ENSG00000088899.13.vs.ENSG00000215251.3	0.00959483	-0.0133938	0.0718305
ENSG00000089012.13.vs.ENSG00000101307.14	-0.452477	-0.132915	0.063482
ENSG00000089101.16.vs.ENSG00000173404.4	-5.09773	0.0584645	0.174291
ENSG00000089101.16.vs.ENSG00000280229.1	-4.98914	1.40036	0.215768
ENSG00000089127.11.vs.ENSG00000111331.11	0.00227097	-0.00172867	0.763632
ENSG00000089169.13.vs.ENSG00000089127.11	-0.092018	0.00117151	0.873302
ENSG00000089280.17.vs.ENSG00000260060.1	0.00234055	-1.24629	0.289313
ENSG00000089280.17.vs.ENSG00000261359.2	0.00219121	0.491153	0.277513
ENSG00000089639.9.vs.ENSG00000105726.15	-0.00980833	0.00454296	0.755726
ENSG00000089692.7.vs.ENSG00000010610.8	0.0549772	-0.0273121	0.228162
ENSG00000089692.7.vs.ENSG00000159335.14	-0.0474773	0.000796211	0.590577
ENSG00000089775.10.vs.ENSG00000259116.1	-0.067126	-0.0411578	0.373082
ENSG00000089775.10.vs.ENSG00000272909.1	-0.0835403	0.329494	0.329807
ENSG00000090006.16.vs.ENSG00000160410.13	-0.00208862	0.00911537	0.304853
ENSG00000090097.19.vs.ENSG00000280422.1	0.0222413	2.63566	0.0709222
ENSG00000090316.14.vs.ENSG00000163945.14	-0.00450556	0.00578265	0.765989
ENSG00000090470.13.vs.ENSG00000246922.7	-0.0218543	-0.0109537	0.844336
ENSG00000090554.11.vs.ENSG00000142541.15	0.245602	-0.000198227	0.468296
ENSG00000090615.11.vs.ENSG00000176915.13	0.000325488	-0.00434046	0.938698
ENSG00000090659.16.vs.ENSG00000182566.11	-0.0948221	0.509627	0.0419204
ENSG00000090674.14.vs.ENSG00000198816.5	0.000360391	-5.33246e-05	0.999888
ENSG00000090924.13.vs.ENSG00000128016.5	0.00272283	0.000198425	0.951037
ENSG00000090932.9.vs.ENSG00000105197.9	0.519101	-0.0112932	1.44975e-05
ENSG00000090975.11.vs.ENSG00000051825.13	-0.0396114	-0.079941	0.0968963
ENSG00000090975.11.vs.ENSG00000150967.16	-0.0300212	-0.00851906	0.554792
ENSG00000090975.11.vs.ENSG00000280120.1	-0.0356747	-0.197293	0.37394
ENSG00000091073.18.vs.ENSG00000243566.5	-0.00076958	0.106627	0.48362
ENSG00000091542.8.vs.ENSG00000091536.15	-0.00677884	-0.0645431	0.73455
ENSG00000091947.8.vs.ENSG00000221044.2	-0.00207476	0.185519	0.967443
ENSG00000092054.12.vs.ENSG00000197616.10	0.41666	-0.57025	0.944819
ENSG00000092068.17.vs.ENSG00000092067.5	0.0017132	-2.02416	0.209136
ENSG00000092096.13.vs.ENSG00000100842.11	0.010516	-0.00471853	0.988311
ENSG00000092140.13.vs.ENSG00000092108.19	-0.00231341	-0.0122027	0.610037
ENSG00000092208.15.vs.ENSG00000258591.2	-0.083733	2.07629	0.248708
ENSG00000092295.10.vs.ENSG00000092330.14	-0.0210347	-0.0239868	0.369026
ENSG00000092295.10.vs.ENSG00000100949.13	-0.0221411	-0.00393133	0.896288
ENSG00000092377.12.vs.ENSG00000237701.1	-1.75764	-2.63519	0.338261
ENSG00000092929.10.vs.ENSG00000266980.1	0.000120628	-0.179129	0.993339
ENSG00000093134.12.vs.ENSG00000112299.7	-1.40133	-0.0151475	0.18958
ENSG00000093134.12.vs.ENSG00000112303.12	-1.59608	-0.00145177	0.254592
ENSG00000094631.17.vs.ENSG00000102145.12	0.0146622	-1.31101	0.11336
ENSG00000095059.14.vs.ENSG00000105583.8	-0.00275978	-0.000302253	0.920404
ENSG00000095261.12.vs.ENSG00000270917.1	-0.0209008	-0.972527	0.395338
ENSG00000095370.18.vs.ENSG00000160404.16	-0.00995309	-0.00924883	0.80795
ENSG00000095485.15.vs.ENSG00000196072.10	-0.0612359	0.00243317	0.173288
ENSG00000095585.15.vs.ENSG00000229417.1	-0.0097855	-0.06975	0.862782
ENSG00000095752.5.vs.ENSG00000269275.1	-0.158408	-0.100689	0.271491
ENSG00000095970.15.vs.ENSG00000161911.10	-0.00809431	-1.75903	0.427995
ENSG00000096717.10.vs.ENSG00000219932.6	-0.0202709	-2.84165	0.276769
ENSG00000097007.16.vs.ENSG00000130713.14	0.00419342	-0.0125152	0.619133
ENSG00000097096.8.vs.ENSG00000280099.1	-0.0589385	0.165529	0.454633
ENSG00000099204.17.vs.ENSG00000228169.3	0.000285882	-4.13423	0.486051
ENSG00000099308.9.vs.ENSG00000268173.1	-0.0099925	-2.99786	0.758185
ENSG00000099337.4.vs.ENSG00000099338.21	-0.00682142	-0.12563	0.700537
ENSG00000099338.21.vs.ENSG00000099341.10	-0.12687	-0.00369769	0.400452
ENSG00000099617.3.vs.ENSG00000228300.12	-0.0949523	0.00518645	0.0719157
ENSG00000099804.7.vs.ENSG00000197540.6	0.000874399	-0.277075	0.563447
ENSG00000099812.7.vs.ENSG00000099864.16	0.00109282	0.0134213	0.448555
ENSG00000099904.14.vs.ENSG00000099901.15	-0.000939064	-0.00109556	0.963211
ENSG00000099954.17.vs.ENSG00000182902.12	-0.056659	-0.134566	0.677272
ENSG00000099985.3.vs.ENSG00000279699.1	0.00228336	-2.96557	0.831105
ENSG00000099992.14.vs.ENSG00000239282.6	-0.0834153	0.556029	0.23721
ENSG00000099994.10.vs.ENSG00000099991.15	0.00575321	0.00268645	0.851403
ENSG00000100034.12.vs.ENSG00000100038.18	9.88987e-06	0.18546	0.91887
ENSG00000100065.13.vs.ENSG00000100060.16	0.00921441	-0.0154021	0.144063
ENSG00000100068.10.vs.ENSG00000231466.2	0.0134217	0.3521	0.683441
ENSG00000100092.19.vs.ENSG00000100083.17	-0.0211732	0.0235376	0.135643
ENSG00000100097.10.vs.ENSG00000100092.19	-0.000621148	-0.0074791	0.596444
ENSG00000100097.10.vs.ENSG00000273899.3	-0.000905513	0.055586	0.609455
ENSG00000100116.15.vs.ENSG00000128310.2	-0.0188237	0.872386	0.508405
ENSG00000100139.12.vs.ENSG00000280527.1	-0.0259423	2.73776	0.0506951
ENSG00000100142.13.vs.ENSG00000100139.12	0.991388	-0.00299847	0.645134
ENSG00000100142.13.vs.ENSG00000278948.1	1.37849	0.400922	0.312345
ENSG00000100142.13.vs.ENSG00000280527.1	1.52245	2.04073	0.0510881
ENSG00000100147.12.vs.ENSG00000198911.10	-0.236959	0.00235628	0.156177
ENSG00000100170.8.vs.ENSG00000232346.1	0.0060368	-0.405902	0.0700487
ENSG00000100197.19.vs.ENSG00000205702.9	-0.122535	0.12241	0.689264
ENSG00000100220.10.vs.ENSG00000205853.9	-0.00230737	0.554534	0.814637
ENSG00000100226.14.vs.ENSG00000272669.1	0.0129735	-0.141462	0.430052
ENSG00000100226.14.vs.ENSG00000273076.1	0.00958328	0.68182	0.429727
ENSG00000100280.15.vs.ENSG00000100276.9	-0.000413159	0.230982	0.823618
ENSG00000100297.14.vs.ENSG00000100292.15	-0.00265715	-0.0285817	0.114048
ENSG00000100335.11.vs.ENSG00000128268.11	0.00209815	-0.0116978	0.839414
ENSG00000100350.13.vs.ENSG00000100348.8	0.0131627	-0.00568103	0.0105656
ENSG00000100350.13.vs.ENSG00000100353.16	0.0134728	-0.00093697	0.0161937
ENSG00000100359.19.vs.ENSG00000272834.1	0.00123654	3.42097	0.0784385
ENSG00000100385.12.vs.ENSG00000133466.12	-0.0410923	-0.00509223	0.253703
ENSG00000100401.18.vs.ENSG00000100399.14	0.000426374	0.0491604	0.873665
ENSG00000100445.15.vs.ENSG00000139899.9	0.136554	-0.0317949	0.318307
ENSG00000100479.11.vs.ENSG00000165506.13	-0.0239625	-0.025819	0.524756
ENSG00000100490.8.vs.ENSG00000012983.10	-0.187013	0.00718349	0.759336
ENSG00000100519.10.vs.ENSG00000198252.10	0.0116289	-0.0841521	0.180404
ENSG00000100522.7.vs.ENSG00000258802.1	-0.0191812	-7.23037	0.214087
ENSG00000100568.9.vs.ENSG00000072042.11	-0.00505216	-0.00310521	0.756925
ENSG00000100596.5.vs.ENSG00000100593.16	-0.00455114	0.0584936	0.00113352
ENSG00000100714.14.vs.ENSG00000179841.8	-0.000415671	-0.156955	0.151259
ENSG00000100802.13.vs.ENSG00000100804.17	0.114625	-0.0063921	0.200723
ENSG00000100804.17.vs.ENSG00000280129.1	-0.00498876	-0.569811	0.514964
ENSG00000100918.11.vs.ENSG00000259529.1	-0.00050807	-0.0767664	0.93274
ENSG00000100979.13.vs.ENSG00000124257.6	-0.00244855	0.013265	0.669395
ENSG00000100979.13.vs.ENSG00000271984.1	-0.00166803	-3.51079	0.166786
ENSG00000100997.17.vs.ENSG00000276952.1	-0.0021815	0.00574309	0.832973
ENSG00000101052.11.vs.ENSG00000101049.13	0.00120179	0.00103279	0.988312
ENSG00000101052.11.vs.ENSG00000215467.2	0.00373554	-1.47329	0.610494
ENSG00000101104.11.vs.ENSG00000166913.11	0.0118064	0.000431749	0.0154275
ENSG00000101203.15.vs.ENSG00000266104.1	0.0537786	2.33922	0.250311
ENSG00000101222.11.vs.ENSG00000101220.16	-0.077625	-0.00351476	0.800938
ENSG00000101236.15.vs.ENSG00000275582.1	-0.00853017	-0.100418	0.797885
ENSG00000101255.9.vs.ENSG00000125826.18	-0.00922284	0.00473428	0.348722
ENSG00000101255.9.vs.ENSG00000125841.11	-0.00298969	0.00127663	0.744376
ENSG00000101310.13.vs.ENSG00000214612.3	0.00250238	-0.210593	0.238359
ENSG00000101336.11.vs.ENSG00000101337.14	-0.000942013	0.00556063	0.0252021
ENSG00000101391.19.vs.ENSG00000101400.5	0.017927	0.0106049	0.0500296
ENSG00000101445.8.vs.ENSG00000101447.12	-0.0903329	0.00625084	0.201949
ENSG00000101460.11.vs.ENSG00000125971.15	0.0155428	-0.00190572	0.387693
ENSG00000101911.11.vs.ENSG00000229083.1	-0.00793625	-2.8282	0.210687
ENSG00000102003.9.vs.ENSG00000012211.11	0.0320908	-0.000136085	0.947825
ENSG00000102003.9.vs.ENSG00000102001.11	0.00998033	0.225412	0.498499
ENSG00000102057.8.vs.ENSG00000068308.12	-0.125495	0.00856755	0.318984
ENSG00000102057.8.vs.ENSG00000068400.12	-0.18017	0.0312546	0.00836362
ENSG00000102100.13.vs.ENSG00000102096.9	0.00769041	-0.0324115	0.105296
ENSG00000102119.9.vs.ENSG00000147403.15	0.00119907	-5.71229e-05	0.975096
ENSG00000102226.8.vs.ENSG00000102225.14	0.0154058	-0.00446773	0.081802
ENSG00000102359.5.vs.ENSG00000261295.1	-0.00815774	-0.0897367	0.284993
ENSG00000102384.12.vs.ENSG00000126950.7	-0.00391964	0.0530879	0.374461
ENSG00000102805.12.vs.ENSG00000228002.2	0.00621368	-1.73132	0.4237
ENSG00000102858.11.vs.ENSG00000168101.13	0.0042017	-0.0127331	0.516135
ENSG00000102870.5.vs.ENSG00000280211.1	0.0205243	1.53317	0.0161072
ENSG00000102898.10.vs.ENSG00000168286.2	-0.00411764	0.00755959	0.725785
ENSG00000102962.4.vs.ENSG00000006210.6	-0.215114	0.00620695	0.00322543
ENSG00000103034.13.vs.ENSG00000276259.1	0.104475	0.568939	0.00122971
ENSG00000103037.10.vs.ENSG00000103034.13	0.0580213	0.11001	0.0220824
ENSG00000103037.10.vs.ENSG00000276259.1	0.0436512	0.579169	0.00223906
ENSG00000103043.13.vs.ENSG00000132613.13	0.0047076	0.0157673	0.728232
ENSG00000103043.13.vs.ENSG00000157423.16	0.00491388	-0.232256	0.79289
ENSG00000103064.12.vs.ENSG00000103066.11	0.00635274	0.00943259	0.866404
ENSG00000103067.10.vs.ENSG00000260891.1	0.00951514	-2.44748	0.215467
ENSG00000103260.7.vs.ENSG00000279255.1	-0.012224	1.08305	0.455023
ENSG00000103264.14.vs.ENSG00000261592.1	0.0181504	0.076113	0.19469
ENSG00000103313.10.vs.ENSG00000010539.10	-0.331182	0.0221359	0.437354
ENSG00000103335.18.vs.ENSG00000278341.1	0.0024565	-0.523548	0.475174
ENSG00000103351.11.vs.ENSG00000262312.2	0.0177884	-1.19529	0.538664
ENSG00000103485.16.vs.ENSG00000197471.10	0.00532552	-0.00967062	0.0507194
ENSG00000103495.12.vs.ENSG00000280789.1	-0.011098	0.155616	0.0117958
ENSG00000103495.12.vs.ENSG00000281348.1	-0.0047515	3.73925	0.284874
ENSG00000103510.18.vs.ENSG00000103507.12	0.0287586	-0.00393693	0.212031
ENSG00000103540.15.vs.ENSG00000103544.13	0.0192943	0.00422902	0.634765
ENSG00000103544.13.vs.ENSG00000174628.15	0.00186271	0.205497	0.151628
ENSG00000103550.12.vs.ENSG00000276571.1	0.0651091	-1.42883	0.0175266
ENSG00000103657.12.vs.ENSG00000259248.4	-0.000726771	-0.100923	0.844606
ENSG00000104221.11.vs.ENSG00000156675.14	-0.1129	-0.00108006	0.0839054
ENSG00000104341.15.vs.ENSG00000202399.1	0.00125086	-11.2844	0.216659
ENSG00000104524.12.vs.ENSG00000104522.14	-0.0121604	6.53986e-05	0.5398
ENSG00000104524.12.vs.ENSG00000104529.16	-0.0218207	0.00504175	0.322719
ENSG00000104635.12.vs.ENSG00000120910.13	-0.00259544	-0.0161934	0.601686
ENSG00000104824.15.vs.ENSG00000104823.7	0.00169168	2.8754e-05	0.913042
ENSG00000104852.13.vs.ENSG00000104863.10	0.00276482	-0.029975	0.530346
ENSG00000104870.11.vs.ENSG00000142534.5	0.00242302	-0.000582907	0.145161
ENSG00000104870.11.vs.ENSG00000142552.6	0.00103136	-0.00469124	0.557085
ENSG00000104918.6.vs.ENSG00000269228.1	-0.000320001	-8.45675	0.416365
ENSG00000104957.12.vs.ENSG00000037757.12	0.036812	-0.0439129	0.130199
ENSG00000104980.6.vs.ENSG00000260500.1	-0.00514522	-4.96185	0.544761
ENSG00000105058.10.vs.ENSG00000072958.7	-0.00544353	0.0110215	0.36607
ENSG00000105131.6.vs.ENSG00000141867.16	0.055346	-0.00206149	0.677065
ENSG00000105136.18.vs.ENSG00000152439.11	0.150657	-0.0444842	0.326929
ENSG00000105137.11.vs.ENSG00000268564.1	-0.00151496	1.44564	0.548194
ENSG00000105176.16.vs.ENSG00000267258.1	0.010084	-0.394562	0.0311347
ENSG00000105219.7.vs.ENSG00000105221.15	-0.0139352	0.00119616	0.856727
ENSG00000105219.7.vs.ENSG00000174521.7	0.0149829	-1.45448	0.272919
ENSG00000105227.13.vs.ENSG00000160396.8	0.033845	-0.275856	0.958213
ENSG00000105270.13.vs.ENSG00000181392.13	0.00139756	-0.00489803	0.976445
ENSG00000105321.11.vs.ENSG00000257704.3	0.0412099	-0.0443653	0.146761
ENSG00000105323.15.vs.ENSG00000142039.3	0.00245557	-0.0102648	0.773414
ENSG00000105355.7.vs.ENSG00000127666.9	-0.000988227	-0.00386785	0.893988
ENSG00000105369.8.vs.ENSG00000076928.16	-0.0366392	0.00371641	0.126144
ENSG00000105369.8.vs.ENSG00000276926.1	-0.0302904	2.1979	0.173502
ENSG00000105372.5.vs.ENSG00000105369.8	-0.000326568	-0.0338044	0.358407
ENSG00000105374.8.vs.ENSG00000105379.8	-0.0900697	0.00180259	0.292216
ENSG00000105402.6.vs.ENSG00000118156.11	0.000997244	0.163639	0.000143685
ENSG00000105409.14.vs.ENSG00000105404.9	-0.0124618	-0.00123736	0.820814
ENSG00000105523.3.vs.ENSG00000268093.1	0.00644458	-0.277674	0.472156
ENSG00000105552.13.vs.ENSG00000087076.7	-0.00867566	0.043589	0.619369
ENSG00000105605.6.vs.ENSG00000126583.9	-1.67636	-0.00337697	0.830774
ENSG00000105642.14.vs.ENSG00000007080.9	-0.385768	-0.00164894	0.881689
ENSG00000105643.8.vs.ENSG00000105642.14	0.00100987	-0.401023	0.927043
ENSG00000105647.13.vs.ENSG00000099308.9	-0.61202	0.00141377	0.311172
ENSG00000105647.13.vs.ENSG00000216490.3	-0.607042	-0.474734	0.12101
ENSG00000105650.20.vs.ENSG00000130518.15	-0.019387	-0.0351484	0.616026
ENSG00000105655.17.vs.ENSG00000105656.11	0.00501844	0.00590561	0.856919
ENSG00000105695.13.vs.ENSG00000012124.13	0.048834	-0.00359222	0.997477
ENSG00000105695.13.vs.ENSG00000105697.6	0.100259	-0.268988	0.831957
ENSG00000105699.15.vs.ENSG00000105698.14	0.00128138	-0.00599391	0.695712
ENSG00000105701.14.vs.ENSG00000105656.11	0.000338536	0.00254274	0.956379
ENSG00000105711.9.vs.ENSG00000089351.13	-0.0774178	0.0149037	0.0299611
ENSG00000105755.6.vs.ENSG00000176531.9	-0.00105168	0.0269069	0.787752
ENSG00000105767.2.vs.ENSG00000011422.10	0.0688016	-0.000959693	0.0420962
ENSG00000105767.2.vs.ENSG00000131116.10	0.0755005	-0.0167644	0.0343179
ENSG00000105829.10.vs.ENSG00000278959.1	0.00272043	0.275877	0.961154
ENSG00000105852.9.vs.ENSG00000105854.11	0.0538901	-0.00615443	0.519667
ENSG00000105880.4.vs.ENSG00000231764.7	-0.025317	-0.00308631	0.955171
ENSG00000105939.11.vs.ENSG00000146858.7	-0.0369473	-0.133355	0.0439502
ENSG00000105997.21.vs.ENSG00000078399.14	0.0478559	-0.00239461	0.00357742
ENSG00000105997.21.vs.ENSG00000105996.6	0.0245758	0.11211	0.000415152
ENSG00000106004.4.vs.ENSG00000106006.6	0.00270632	0.132074	0.0154364
ENSG00000106066.12.vs.ENSG00000235669.1	-0.00340288	0.0225998	0.938828
ENSG00000106153.12.vs.ENSG00000164776.8	-0.000835918	0.0194325	0.822447
ENSG00000106153.12.vs.ENSG00000185290.3	-0.00094962	1.3599	0.0223821
ENSG00000106258.12.vs.ENSG00000224448.1	-0.0027456	-1.85739	0.732538
ENSG00000106333.11.vs.ENSG00000106330.10	7.04887e-05	-0.00529367	0.971949
ENSG00000106333.11.vs.ENSG00000106336.11	0.000199949	-0.918867	0.787536
ENSG00000106351.11.vs.ENSG00000184414.2	0.0124758	-0.378244	0.400815
ENSG00000106384.9.vs.ENSG00000213394.3	0.0327571	-1.93601	0.00186551
ENSG00000106479.9.vs.ENSG00000171130.16	0.00428316	0.0109461	0.60289
ENSG00000106484.13.vs.ENSG00000270953.1	0.0103831	0.0121684	0.266544
ENSG00000106609.15.vs.ENSG00000179131.7	0.00357345	-1.95129	0.320471
ENSG00000106682.13.vs.ENSG00000086730.15	0.00285298	-0.0183327	0.58003
ENSG00000106701.10.vs.ENSG00000070214.14	0.0273974	-0.00769682	0.15115
ENSG00000106785.13.vs.ENSG00000106789.11	-0.0133204	-0.00212204	0.307192
ENSG00000106789.11.vs.ENSG00000095383.18	-0.00258493	-0.0242362	0.13395
ENSG00000106809.9.vs.ENSG00000127083.7	0.0474089	-0.304357	0.55628
ENSG00000106948.15.vs.ENSG00000095397.12	-0.0181015	-0.017415	0.269897
ENSG00000107020.8.vs.ENSG00000231967.1	-0.00843355	1.33811	0.748006
ENSG00000107281.8.vs.ENSG00000054179.10	-0.00355725	0.0149715	0.209441
ENSG00000107281.8.vs.ENSG00000180549.7	-0.00119054	0.370865	0.00536279
ENSG00000107331.15.vs.ENSG00000180549.7	-0.00216096	0.366733	0.00395851
ENSG00000107625.11.vs.ENSG00000165730.13	0.00785021	-0.0605399	0.461765
ENSG00000107625.11.vs.ENSG00000165732.11	0.0129932	-0.00331332	0.690195
ENSG00000107738.18.vs.ENSG00000214688.4	-0.00737537	-1.64959	0.655763
ENSG00000107874.9.vs.ENSG00000059915.15	-0.000839518	0.0114919	0.66919
ENSG00000107902.12.vs.ENSG00000278831.1	-0.00119722	-0.406513	0.929029
ENSG00000108187.14.vs.ENSG00000204130.11	0.000404667	-0.0297947	0.770659
ENSG00000108352.10.vs.ENSG00000108349.13	-0.00324454	0.00144743	0.808116
ENSG00000108375.11.vs.ENSG00000176160.8	0.00176439	-3.90587	0.00201632
ENSG00000108389.8.vs.ENSG00000108387.13	-0.0232504	-0.0177561	0.349882
ENSG00000108405.3.vs.ENSG00000004660.13	0.0372439	0.000715702	0.928359
ENSG00000108405.3.vs.ENSG00000074370.16	0.0379603	3.85045e-05	0.928667
ENSG00000108506.10.vs.ENSG00000136492.7	0.0158757	-0.0560807	0.587648
ENSG00000108511.9.vs.ENSG00000120068.6	0.00289936	0.00428217	0.392709
ENSG00000108587.13.vs.ENSG00000108582.10	0.0129226	-0.000872494	0.846352
ENSG00000108592.15.vs.ENSG00000108604.14	0.0104937	9.13988e-05	0.458989
ENSG00000108639.6.vs.ENSG00000187997.10	-0.000271331	-0.0540707	0.941961
ENSG00000108639.6.vs.ENSG00000267679.1	0.000302992	-1.28303	0.45141
ENSG00000108654.10.vs.ENSG00000256525.5	0.00048821	0.0669971	0.403677
ENSG00000108669.15.vs.ENSG00000055483.18	0.00238143	0.00987498	0.470265
ENSG00000108671.8.vs.ENSG00000176749.7	-0.000514539	0.0614039	0.889433
ENSG00000108784.8.vs.ENSG00000108786.9	-0.00690201	0.0170355	0.828283
ENSG00000108784.8.vs.ENSG00000267185.1	-0.00636253	-1.70658	0.267576
ENSG00000108785.7.vs.ENSG00000108784.8	-0.0237343	-0.00675319	0.830697
ENSG00000108786.9.vs.ENSG00000068120.13	-0.00559968	0.00250901	0.8995
ENSG00000108799.11.vs.ENSG00000214578.5	0.0216194	1.24208	0.127184
ENSG00000108829.9.vs.ENSG00000279792.1	-0.00217779	0.0274512	0.626015
ENSG00000108840.14.vs.ENSG00000161654.8	0.00802968	0.00335744	0.575152
ENSG00000108947.4.vs.ENSG00000183914.13	-0.0404739	-0.0277328	0.743282
ENSG00000109089.7.vs.ENSG00000167862.8	-0.0219118	-0.0150493	0.286152
ENSG00000109270.11.vs.ENSG00000164031.15	-0.00322426	-0.0218922	0.330444
ENSG00000109272.3.vs.ENSG00000124875.8	-0.468188	-0.105479	0.49565
ENSG00000109654.13.vs.ENSG00000121211.6	-0.000629616	-0.0504479	0.619509
ENSG00000109758.7.vs.ENSG00000159788.17	0.171751	0.00969563	0.728192
ENSG00000109854.12.vs.ENSG00000185238.11	0.0110972	-0.00594414	0.293603
ENSG00000109906.12.vs.ENSG00000166741.6	-0.155247	-0.00483979	0.557447
ENSG00000109944.9.vs.ENSG00000109943.7	0.0684537	-1.34341	0.058106
ENSG00000110011.12.vs.ENSG00000149781.11	0.016177	-0.00834147	0.61371
ENSG00000110011.12.vs.ENSG00000173486.11	-0.000135813	0.00609978	0.564971
ENSG00000110076.17.vs.ENSG00000068831.17	0.0185228	-0.0076004	0.862637
ENSG00000110090.11.vs.ENSG00000132749.9	0.00248901	-0.0610858	0.31439
ENSG00000110169.9.vs.ENSG00000110171.17	0.328198	0.0267904	0.011537
ENSG00000110200.7.vs.ENSG00000149357.8	0.0796676	-0.0190938	0.0678615
ENSG00000110245.10.vs.ENSG00000235910.1	0.72298	-2.02846	0.167775
ENSG00000110330.7.vs.ENSG00000023445.12	-0.00185848	-0.0199117	0.201561
ENSG00000110497.13.vs.ENSG00000180720.7	0.0369154	-0.0410697	0.0504144
ENSG00000110651.10.vs.ENSG00000184281.13	-0.00223824	0.0248834	0.240458
ENSG00000110719.8.vs.ENSG00000006534.14	-0.00411953	0.00781908	0.580049
ENSG00000110723.10.vs.ENSG00000178202.11	-0.0119301	0.00596428	0.763804
ENSG00000110786.16.vs.ENSG00000179057.12	0.110833	0.09913	0.570757
ENSG00000110799.12.vs.ENSG00000047617.13	0.00180689	-0.946763	0.286566
ENSG00000110841.12.vs.ENSG00000230519.2	-0.0111528	0.749429	0.586406
ENSG00000110841.12.vs.ENSG00000276261.1	-0.0123454	0.706304	0.641309
ENSG00000110917.6.vs.ENSG00000175970.8	-0.000503145	-0.000989418	0.848056
ENSG00000110955.7.vs.ENSG00000076108.10	-0.000375235	0.0047344	0.39078
ENSG00000111077.16.vs.ENSG00000063046.16	0.00659751	-1.27469e-05	0.764599
ENSG00000111196.8.vs.ENSG00000060140.7	-0.020846	-0.0349909	0.518816
ENSG00000111229.14.vs.ENSG00000258011.2	-0.00175134	-1.14991	0.528442
ENSG00000111276.9.vs.ENSG00000178878.11	0.00123258	-0.000830938	0.962424
ENSG00000111300.8.vs.ENSG00000274227.1	-0.0180944	0.419493	0.579846
ENSG00000111319.11.vs.ENSG00000067182.6	0.00275748	-0.0116295	0.104484
ENSG00000111331.11.vs.ENSG00000111335.11	-6.66221e-05	-0.00081199	0.978206
ENSG00000111348.7.vs.ENSG00000139055.5	-0.015742	0.0163671	0.0153501
ENSG00000111405.7.vs.ENSG00000079337.14	-0.428208	-0.00213671	0.930002
ENSG00000111405.7.vs.ENSG00000280054.1	-0.243681	-0.805264	0.761265
ENSG00000111445.12.vs.ENSG00000276292.1	-0.0156752	0.218782	0.766227
ENSG00000111615.11.vs.ENSG00000257497.2	0.000786998	-0.0183478	0.99653
ENSG00000111642.13.vs.ENSG00000111641.9	0.00394376	-0.000690252	0.42944
ENSG00000111664.9.vs.ENSG00000250510.6	0.11682	0.12612	0.662628
ENSG00000111670.13.vs.ENSG00000139351.13	-0.0194996	-0.21988	0.128313
ENSG00000111679.15.vs.ENSG00000111676.13	0.00326766	-0.00167051	0.928984
ENSG00000111679.15.vs.ENSG00000271969.1	0.000590797	0.643403	0.771748
ENSG00000111684.9.vs.ENSG00000238795.1	-0.0311014	-0.218565	0.397917
ENSG00000111716.11.vs.ENSG00000121361.3	-0.000416866	-0.0885323	0.511383
ENSG00000111837.10.vs.ENSG00000222383.1	-0.168961	4.17506	0.267005
ENSG00000111860.12.vs.ENSG00000216809.1	-0.152923	2.04068	0.639445
ENSG00000111911.6.vs.ENSG00000066651.16	-0.00400914	0.00376424	0.974243
ENSG00000111981.4.vs.ENSG00000231120.3	-0.222407	-0.821628	0.552204
ENSG00000112031.14.vs.ENSG00000091844.6	0.0687582	-0.244076	0.469919
ENSG00000112039.3.vs.ENSG00000276712.1	-0.0346686	1.53498	0.224087
ENSG00000112208.11.vs.ENSG00000112200.15	-0.0233855	-0.00817369	0.401554
ENSG00000112308.11.vs.ENSG00000272345.1	0.00162154	-0.0475371	0.937766
ENSG00000112486.13.vs.ENSG00000166984.10	-0.0626251	-0.510369	0.867989
ENSG00000112655.14.vs.ENSG00000112658.7	0.0040571	0.00355067	0.118112
ENSG00000112655.14.vs.ENSG00000137171.13	0.00384075	0.00928651	0.0327971
ENSG00000112763.14.vs.ENSG00000111801.14	0.0416968	-0.0109271	0.0040928
ENSG00000112852.6.vs.ENSG00000113205.4	0.0706847	-0.101418	0.64588
ENSG00000113212.6.vs.ENSG00000120322.3	0.0664365	0.0128824	0.675505
ENSG00000113212.6.vs.ENSG00000272674.3	0.0754135	0.0132377	0.620471
ENSG00000113269.12.vs.ENSG00000278965.1	-0.00518978	-2.11721	0.684498
ENSG00000113272.12.vs.ENSG00000155858.5	-0.0127433	0.015926	0.810979
ENSG00000113387.10.vs.ENSG00000249142.1	0.0012356	-2.07818	0.693097
ENSG00000113460.11.vs.ENSG00000168724.13	0.00344008	0.000457955	0.82221
ENSG00000113552.14.vs.ENSG00000254099.1	-0.00220875	-1.11594	0.816427
ENSG00000113569.14.vs.ENSG00000270558.1	-0.0141425	0.806083	0.22428
ENSG00000113600.9.vs.ENSG00000082074.14	0.810618	-0.0865852	0.15375
ENSG00000113621.13.vs.ENSG00000279799.1	-0.0296374	-0.16303	0.347983
ENSG00000113638.11.vs.ENSG00000132356.10	-0.114011	0.0174524	0.137996
ENSG00000113643.7.vs.ENSG00000188573.7	0.00207193	0.213752	0.0906435
ENSG00000113716.11.vs.ENSG00000155850.7	0.0129213	-0.00291795	0.272281
ENSG00000113722.15.vs.ENSG00000011083.7	-0.000424144	-0.0222573	0.877681
ENSG00000113732.7.vs.ENSG00000253785.1	-0.00294874	-0.263875	0.343295
ENSG00000113758.12.vs.ENSG00000246334.2	0.00452623	-0.113393	0.416875
ENSG00000113758.12.vs.ENSG00000279821.1	0.00467714	-0.165793	0.424847
ENSG00000113812.12.vs.ENSG00000113811.9	-0.030639	-0.00394934	0.700705
ENSG00000113812.12.vs.ENSG00000271976.1	-0.0353109	0.0721583	0.577252
ENSG00000113851.12.vs.ENSG00000281584.1	-0.0161105	0.207104	0.668583
ENSG00000113905.4.vs.ENSG00000090512.10	0.206296	-1.33023	0.685226
ENSG00000114021.10.vs.ENSG00000036054.11	-0.00267355	-0.00760168	0.843696
ENSG00000114126.16.vs.ENSG00000279147.1	0.0077748	-4.42508	0.557181
ENSG00000114127.9.vs.ENSG00000175054.13	-0.0272263	0.0254244	0.233967
ENSG00000114270.14.vs.ENSG00000010256.9	-0.00283933	-0.000585958	0.709063
ENSG00000114270.14.vs.ENSG00000114268.10	-0.00246239	-0.0154002	0.668541
ENSG00000114331.11.vs.ENSG00000173950.14	-0.00771118	0.000239517	0.734804
ENSG00000114383.8.vs.ENSG00000114378.15	-0.00780849	-0.0251509	0.310223
ENSG00000114391.11.vs.ENSG00000066422.4	-0.000225247	-0.00589102	0.915539
ENSG00000114491.12.vs.ENSG00000160145.14	-0.00571211	0.00577545	0.831057
ENSG00000114520.9.vs.ENSG00000144909.7	0.0114154	-0.0416954	0.662084
ENSG00000114520.9.vs.ENSG00000252965.1	-0.00184626	-1.01046	0.869581
ENSG00000114544.14.vs.ENSG00000144908.12	0.00933619	-0.00635335	0.419259
ENSG00000114626.16.vs.ENSG00000221413.1	0.00330486	3.96951	0.476192
ENSG00000114646.8.vs.ENSG00000173473.9	0.107707	0.00257774	0.635278
ENSG00000114744.7.vs.ENSG00000206199.8	-0.022622	-1.93847	0.385835
ENSG00000114770.15.vs.ENSG00000223529.1	0.0198668	-0.386355	0.0538817
ENSG00000114854.6.vs.ENSG00000010319.5	-0.0690367	0.0159078	0.646876
ENSG00000114993.14.vs.ENSG00000233155.1	0.0291924	-0.29201	0.000233378
ENSG00000115226.8.vs.ENSG00000138002.13	-0.0324024	-0.00213307	0.920713
ENSG00000115266.10.vs.ENSG00000115268.8	0.0233196	-0.00100149	0.293902
ENSG00000115268.8.vs.ENSG00000071626.15	-0.000933	-0.000633954	0.301495
ENSG00000115275.10.vs.ENSG00000204822.6	0.00719474	0.102106	0.480309
ENSG00000115286.18.vs.ENSG00000160953.13	-0.00319633	0.0169363	0.438486
ENSG00000115504.13.vs.ENSG00000115507.8	0.00698298	0.086949	0.254382
ENSG00000115524.14.vs.ENSG00000213104.3	0.00193737	-1.617	0.618241
ENSG00000115594.10.vs.ENSG00000115598.8	-0.00893527	0.213377	0.0309728
ENSG00000115649.14.vs.ENSG00000213901.9	0.00451325	0.254693	0.281162
ENSG00000115649.14.vs.ENSG00000280537.1	0.00505473	0.283903	0.572026
ENSG00000115760.12.vs.ENSG00000018699.10	-0.0013303	0.0136955	0.798326
ENSG00000115808.10.vs.ENSG00000279519.1	-0.0154806	0.111169	0.53569
ENSG00000115841.18.vs.ENSG00000232973.10	-0.055181	-0.694366	0.55264
ENSG00000115850.8.vs.ENSG00000076003.4	-0.824093	0.000726945	0.737893
ENSG00000115902.9.vs.ENSG00000232613.5	-0.00391511	-0.798288	0.566685
ENSG00000115998.6.vs.ENSG00000231414.1	-0.0405	-0.633606	0.804058
ENSG00000116001.14.vs.ENSG00000231414.1	0.0055421	-1.11621	0.626963
ENSG00000116014.8.vs.ENSG00000116017.9	-0.506399	0.00329877	0.601612
ENSG00000116017.9.vs.ENSG00000065268.9	0.00434818	-0.00740831	0.411532
ENSG00000116030.15.vs.ENSG00000223825.5	0.00357493	-0.0475533	0.699627
ENSG00000116032.5.vs.ENSG00000065268.9	0.0861341	-0.00677013	0.602544
ENSG00000116039.10.vs.ENSG00000116035.2	0.0985117	-0.130636	0.728251
ENSG00000116095.9.vs.ENSG00000237298.7	-0.0228184	-0.0504315	0.607954
ENSG00000116199.10.vs.ENSG00000186283.12	-0.0161643	-0.0116661	0.30144
ENSG00000116254.16.vs.ENSG00000116251.8	0.185626	0.00138305	0.244781
ENSG00000116396.12.vs.ENSG00000197106.6	-0.00247879	-0.121819	0.904552
ENSG00000116478.10.vs.ENSG00000182866.15	0.00218272	-0.037083	0.331222
ENSG00000116489.11.vs.ENSG00000155363.17	-0.00700219	0.00799305	0.104144
ENSG00000116525.12.vs.ENSG00000278997.1	0.117134	-1.06115	0.373559
ENSG00000116584.16.vs.ENSG00000163479.12	0.00899515	-0.000616439	0.401016
ENSG00000116678.17.vs.ENSG00000116675.14	-0.0396115	0.12001	0.0460717
ENSG00000116691.9.vs.ENSG00000116688.15	-0.0147699	-0.00270792	0.503572
ENSG00000116729.12.vs.ENSG00000229133.1	0.00407877	0.0486697	0.872043
ENSG00000116748.18.vs.ENSG00000175984.13	-0.0390861	-0.301559	0.426523
ENSG00000116752.5.vs.ENSG00000175984.13	-0.0150564	-0.314137	0.318956
ENSG00000116771.5.vs.ENSG00000272510.1	-0.0114374	0.280224	0.528164
ENSG00000116786.10.vs.ENSG00000162460.6	-0.00316154	0.0159784	0.950915
ENSG00000116898.10.vs.ENSG00000116885.17	-0.00395573	-0.0967149	0.571816
ENSG00000116898.10.vs.ENSG00000119535.16	-0.00757429	-0.0293926	0.429791
ENSG00000117069.13.vs.ENSG00000230498.1	-0.0615796	-1.14962	0.602177
ENSG00000117118.8.vs.ENSG00000159363.16	-0.0132109	-0.00023368	0.0864824
ENSG00000117122.12.vs.ENSG00000159363.16	0.00136367	-0.00339259	0.679948
ENSG00000117153.14.vs.ENSG00000183155.4	0.0114905	-0.0951251	0.227084
ENSG00000117222.12.vs.ENSG00000174529.7	-0.0375192	0.481833	0.205795
ENSG00000117308.13.vs.ENSG00000117305.13	0.000927881	-0.0112691	0.651467
ENSG00000117322.15.vs.ENSG00000203710.9	0.0114808	-0.190305	0.70332
ENSG00000117410.12.vs.ENSG00000132768.12	-0.00964096	0.0260554	0.0885659
ENSG00000117411.15.vs.ENSG00000132768.12	-0.0152416	0.0140001	0.518368
ENSG00000117425.12.vs.ENSG00000070785.15	0.131882	-0.000724268	0.494814
ENSG00000117594.8.vs.ENSG00000123689.5	-0.230903	0.0127289	0.212328
ENSG00000117682.15.vs.ENSG00000131914.9	-0.0387835	-0.0152517	0.127796
ENSG00000117682.15.vs.ENSG00000198830.9	-0.0346419	-0.00178257	0.100371
ENSG00000117713.16.vs.ENSG00000060642.9	0.000151134	-0.0730373	0.113641
ENSG00000117758.12.vs.ENSG00000117751.16	-0.0205774	-0.0179993	0.0665769
ENSG00000118113.10.vs.ENSG00000137675.4	-0.101845	-16.6791	0.544063
ENSG00000118160.12.vs.ENSG00000105419.16	0.210571	-0.0289262	0.161754
ENSG00000118200.13.vs.ENSG00000231333.2	-0.0049138	-4.79769	0.263925
ENSG00000118292.7.vs.ENSG00000159208.14	-0.301436	0.192672	0.0508074
ENSG00000118402.5.vs.ENSG00000218582.2	-0.372077	-0.473415	0.376565
ENSG00000118473.20.vs.ENSG00000152760.8	-0.0758096	-0.0168016	0.640442
ENSG00000118873.14.vs.ENSG00000232134.1	-0.00555197	0.0223691	0.924047
ENSG00000119231.9.vs.ENSG00000225578.1	-0.0325615	1.89926	0.00390041
ENSG00000119326.13.vs.ENSG00000106771.11	-0.00303013	-0.0164367	0.182997
ENSG00000119333.10.vs.ENSG00000234705.1	-0.0038378	-1.00934	0.274648
ENSG00000119333.10.vs.ENSG00000280758.1	-0.00404607	0.481393	0.431541
ENSG00000119335.15.vs.ENSG00000160447.6	0.00239323	-0.0177326	0.429434
ENSG00000119414.10.vs.ENSG00000235332.2	-0.0206282	-1.38672	0.182194
ENSG00000119431.8.vs.ENSG00000148218.14	-0.00823047	0.0249171	0.217038
ENSG00000119559.14.vs.ENSG00000267317.2	-0.0193299	0.00971607	0.477101
ENSG00000119640.7.vs.ENSG00000119684.14	-0.0539646	0.0109883	0.671862
ENSG00000119673.13.vs.ENSG00000279026.1	-0.000204482	0.360718	0.903855
ENSG00000119684.14.vs.ENSG00000258646.1	0.0173691	-1.55617	0.584462
ENSG00000119737.5.vs.ENSG00000265452.1	0.0137293	1.63888	0.398357
ENSG00000119777.17.vs.ENSG00000084764.9	0.00191942	-0.00111146	0.91413
ENSG00000119922.8.vs.ENSG00000232110.6	-0.00732151	1.446	0.867079
ENSG00000119943.9.vs.ENSG00000107521.17	-0.00797611	-0.00198711	0.94443
ENSG00000120029.11.vs.ENSG00000120049.17	-0.0363193	0.176158	0.132839
ENSG00000120075.5.vs.ENSG00000108511.9	0.00493072	0.0035682	0.543815
ENSG00000120093.10.vs.ENSG00000120068.6	0.0110073	0.000306693	0.0248499
ENSG00000120318.14.vs.ENSG00000197948.9	0.0341858	0.0425181	0.00476885
ENSG00000120324.6.vs.ENSG00000120322.3	0.059535	0.0277744	0.670339
ENSG00000120324.6.vs.ENSG00000197479.6	0.0872573	-0.0315567	0.703623
ENSG00000120327.6.vs.ENSG00000187372.11	0.001405	-0.0218049	0.919492
ENSG00000120328.6.vs.ENSG00000187372.11	0.239121	-0.0677801	0.314816
ENSG00000120328.6.vs.ENSG00000197479.6	0.109337	-0.0338952	0.698343
ENSG00000120437.8.vs.ENSG00000146457.13	0.00725143	-0.00972259	0.526817
ENSG00000120440.12.vs.ENSG00000112494.8	0.490678	0.0142287	0.129738
ENSG00000120669.14.vs.ENSG00000242715.6	-0.0563553	-0.0487886	0.930648
ENSG00000120697.7.vs.ENSG00000102710.18	-0.00574512	0.00801135	0.300346
ENSG00000120709.9.vs.ENSG00000120733.12	-0.0177574	0.00962582	0.467164
ENSG00000120738.7.vs.ENSG00000241458.1	0.00114191	-1.87744	0.139862
ENSG00000120784.14.vs.ENSG00000198182.11	0.0155394	-0.122262	0.414115
ENSG00000120913.22.vs.ENSG00000241852.8	0.0125844	-0.12732	0.503776
ENSG00000120948.14.vs.ENSG00000271895.2	0.0106536	-0.00908844	0.392349
ENSG00000121406.7.vs.ENSG00000152439.11	-0.146851	0.171838	0.241952
ENSG00000121552.3.vs.ENSG00000240236.1	-0.127833	-2.06439	0.494742
ENSG00000121671.10.vs.ENSG00000121653.10	0.0211991	0.103242	2.19589e-06
ENSG00000121775.16.vs.ENSG00000025800.12	-0.0338234	-0.0104434	0.349198
ENSG00000121940.14.vs.ENSG00000085433.14	-0.00264767	-0.020447	0.941732
ENSG00000122068.11.vs.ENSG00000186001.11	-0.0118485	0.0123334	0.549044
ENSG00000122375.10.vs.ENSG00000122367.18	-2.08634	0.0271693	0.741014
ENSG00000122386.9.vs.ENSG00000085644.12	0.010318	-0.00691809	0.945029
ENSG00000122477.11.vs.ENSG00000137992.13	0.275468	-0.00668091	0.870454
ENSG00000122694.14.vs.ENSG00000185972.5	-0.0358177	0.371595	0.194056
ENSG00000122877.12.vs.ENSG00000238280.1	0.0183631	1.17829	0.602574
ENSG00000122912.13.vs.ENSG00000138346.13	-0.0590901	0.0130562	0.294374
ENSG00000122971.7.vs.ENSG00000175970.8	-0.00227587	-0.00364721	0.878059
ENSG00000123144.9.vs.ENSG00000105576.14	-0.00927385	0.00971152	0.151154
ENSG00000123159.14.vs.ENSG00000160951.3	-0.000751249	0.18594	0.499268
ENSG00000123338.11.vs.ENSG00000123360.10	-0.0381645	0.0607822	0.251708
ENSG00000123342.14.vs.ENSG00000135392.14	-0.0251235	0.0403213	0.358797
ENSG00000123342.14.vs.ENSG00000257390.4	-0.022092	-1.89286	0.463418
ENSG00000123349.12.vs.ENSG00000135476.10	-0.00177014	-0.00014056	0.711207
ENSG00000123395.13.vs.ENSG00000123358.18	0.00428393	0.00292933	0.007313
ENSG00000123411.13.vs.ENSG00000139531.11	-0.0104702	-0.0038007	0.961561
ENSG00000123453.15.vs.ENSG00000225756.1	0.31411	-0.696792	0.0933901
ENSG00000123838.9.vs.ENSG00000123843.11	-0.0193891	-0.00950532	0.472751
ENSG00000123870.10.vs.ENSG00000167562.10	0.552526	-0.235261	0.125125
ENSG00000123933.13.vs.ENSG00000214367.6	0.00382972	0.0212456	0.85798
ENSG00000123975.4.vs.ENSG00000187742.13	-0.0139901	0.00245774	0.200366
ENSG00000124006.13.vs.ENSG00000268896.1	0.0142174	2.01413	0.0180727
ENSG00000124067.15.vs.ENSG00000141096.4	0.0181946	-1.42391	0.325569
ENSG00000124092.11.vs.ENSG00000124097.7	-0.163744	0.393054	0.629978
ENSG00000124134.7.vs.ENSG00000175121.10	0.0282904	-1.94749	0.854997
ENSG00000124155.15.vs.ENSG00000244274.6	0.00175507	-0.0926497	0.510397
ENSG00000124226.9.vs.ENSG00000229222.1	0.00303826	0.15385	0.584118
ENSG00000124257.6.vs.ENSG00000271984.1	0.0279372	-3.77884	0.211324
ENSG00000124313.11.vs.ENSG00000126012.10	-0.0335443	0.00673485	0.028085
ENSG00000124391.4.vs.ENSG00000158545.14	-0.874916	0.0273895	0.00842917
ENSG00000124440.14.vs.ENSG00000011485.13	0.0764915	-0.00544951	0.0863538
ENSG00000124486.11.vs.ENSG00000237931.1	0.000621791	-3.62143	0.589
ENSG00000124508.15.vs.ENSG00000026950.15	0.0572167	-0.0256751	0.178167
ENSG00000124508.15.vs.ENSG00000186470.12	0.0254979	-0.00535921	0.800156
ENSG00000124541.6.vs.ENSG00000112640.13	-0.0107216	-0.00160546	0.807301
ENSG00000124541.6.vs.ENSG00000137171.13	-0.0164625	0.0105722	0.105825
ENSG00000124549.13.vs.ENSG00000026950.15	0.219035	-0.0249691	0.127452
ENSG00000124549.13.vs.ENSG00000111801.14	0.152499	-0.0224272	0.301897
ENSG00000124587.12.vs.ENSG00000181524.6	-0.00164918	-0.0585047	0.418449
ENSG00000124657.1.vs.ENSG00000214374.2	0.920502	-2.21659	0.63171
ENSG00000124701.5.vs.ENSG00000001167.13	-0.18228	0.00409978	0.950792
ENSG00000124701.5.vs.ENSG00000112212.10	-0.0550976	-0.429518	0.754759
ENSG00000124766.5.vs.ENSG00000220771.2	0.00383346	-3.17507	0.115525
ENSG00000124802.10.vs.ENSG00000188428.15	0.0730909	-0.034424	0.211695
ENSG00000124802.10.vs.ENSG00000259040.4	0.0532965	0.694798	0.337739
ENSG00000124942.12.vs.ENSG00000254772.8	-0.000553907	-0.170854	0.651718
ENSG00000125046.13.vs.ENSG00000180914.9	0.0297537	0.0913423	0.00454463
ENSG00000125046.13.vs.ENSG00000227110.5	0.0277814	-0.357019	0.542977
ENSG00000125089.15.vs.ENSG00000250471.2	0.0109126	-1.9542	0.288783
ENSG00000125149.10.vs.ENSG00000067955.12	-0.0333935	-0.00392779	0.682705
ENSG00000125257.12.vs.ENSG00000223298.1	0.00101695	0.578184	0.969058
ENSG00000125347.12.vs.ENSG00000234290.2	-0.0022086	-0.0309344	0.69835
ENSG00000125434.9.vs.ENSG00000271029.1	-0.0153175	-1.09065	0.94893
ENSG00000125449.5.vs.ENSG00000170190.14	0.00589636	0.00268344	0.945618
ENSG00000125498.18.vs.ENSG00000243772.5	1.17408	-0.556219	0.740029
ENSG00000125611.14.vs.ENSG00000125630.14	-0.00121592	0.00295308	0.97155
ENSG00000125735.9.vs.ENSG00000125730.15	-0.10169	0.00024621	0.842485
ENSG00000125741.4.vs.ENSG00000125746.13	-0.00135311	-0.00134183	0.970736
ENSG00000125746.13.vs.ENSG00000177464.4	-0.0015416	-0.0249964	0.832546
ENSG00000125753.12.vs.ENSG00000213889.9	-0.00246811	0.0984056	0.432193
ENSG00000125787.10.vs.ENSG00000132670.19	0.100109	0.00093865	0.985913
ENSG00000125810.9.vs.ENSG00000279447.1	-0.0055367	-0.634135	0.73535
ENSG00000125821.10.vs.ENSG00000101310.13	0.00497588	0.00152867	0.704851
ENSG00000125900.11.vs.ENSG00000101307.14	-0.105107	-0.329693	0.347335
ENSG00000125910.5.vs.ENSG00000125912.9	-0.221097	0.000601342	0.360001
ENSG00000125952.17.vs.ENSG00000272158.1	-0.0256405	-1.31457	0.156003
ENSG00000125966.9.vs.ENSG00000229230.3	0.0709201	-2.18552	0.304689
ENSG00000125998.7.vs.ENSG00000126005.14	0.0602523	0.000496326	0.929954
ENSG00000125998.7.vs.ENSG00000261582.1	0.0689937	-0.189552	0.902259
ENSG00000126062.3.vs.ENSG00000007402.10	0.00971437	-0.0217283	0.66299
ENSG00000126091.18.vs.ENSG00000117407.15	-0.00736804	0.0207932	0.986575
ENSG00000126218.10.vs.ENSG00000126231.12	0.0370478	-0.282118	0.121877
ENSG00000126246.8.vs.ENSG00000267439.1	-0.237851	-4.54963	0.302852
ENSG00000126254.10.vs.ENSG00000105672.13	0.00893285	-0.208254	0.439096
ENSG00000126267.7.vs.ENSG00000105668.6	-0.00182304	0.371223	0.0153771
ENSG00000126267.7.vs.ENSG00000105672.13	-0.00153939	0.0236975	0.788744
ENSG00000126337.12.vs.ENSG00000171401.13	0.393965	-0.070803	0.501821
ENSG00000126337.12.vs.ENSG00000197079.7	0.318675	0.226677	0.514807
ENSG00000126602.9.vs.ENSG00000005339.11	-0.00143486	0.00589266	0.577231
ENSG00000126698.9.vs.ENSG00000169403.10	-0.00618239	-0.0400134	0.220375
ENSG00000126698.9.vs.ENSG00000270605.1	-0.00591614	0.0675909	0.668084
ENSG00000126746.16.vs.ENSG00000139200.12	0.00152783	-0.415269	0.767661
ENSG00000126759.11.vs.ENSG00000126767.16	-0.134925	-0.00396289	0.634408
ENSG00000126775.8.vs.ENSG00000182521.5	-0.0380868	-3.09533	0.492179
ENSG00000126883.15.vs.ENSG00000126878.11	0.0112244	0.000343424	0.569087
ENSG00000126953.5.vs.ENSG00000270813.2	0.0489426	-0.224584	0.302445
ENSG00000127022.13.vs.ENSG00000161021.10	0.000111667	0.0252681	0.233808
ENSG00000127191.16.vs.ENSG00000213590.2	0.00345976	-0.393825	0.885513
ENSG00000127337.5.vs.ENSG00000090382.5	-0.0176182	-0.000141996	0.491666
ENSG00000127364.3.vs.ENSG00000270923.1	-0.377018	1.46742	0.662001
ENSG00000127366.5.vs.ENSG00000127364.3	1.0035	-0.392226	0.190159
ENSG00000127366.5.vs.ENSG00000270923.1	1.38142	-1.96573	0.163509
ENSG00000127412.5.vs.ENSG00000197993.6	-5.44479	0.502538	0.689692
ENSG00000127511.8.vs.ENSG00000127533.3	0.0234384	-0.0972888	0.147373
ENSG00000127540.10.vs.ENSG00000071564.13	-0.0129002	0.00512827	0.176408
ENSG00000127540.10.vs.ENSG00000071655.16	-0.0100704	0.00260316	0.322332
ENSG00000127578.6.vs.ENSG00000102854.13	0.0874027	-0.00539242	0.305528
ENSG00000127585.10.vs.ENSG00000127580.14	-0.00633961	-0.0027592	0.92302
ENSG00000127884.4.vs.ENSG00000148803.10	-0.000426911	-0.0103283	0.771908
ENSG00000127957.15.vs.ENSG00000127946.15	0.217622	0.00379181	0.260285
ENSG00000128000.14.vs.ENSG00000269069.1	-0.03094	0.857893	0.437428
ENSG00000128159.10.vs.ENSG00000273137.1	0.00663451	0.291742	0.22387
ENSG00000128191.12.vs.ENSG00000099901.15	0.0277494	-0.00270006	0.260236
ENSG00000128218.7.vs.ENSG00000187792.4	-0.244155	-0.181354	0.277735
ENSG00000128228.4.vs.ENSG00000100023.16	-0.00787047	0.0233261	0.249788
ENSG00000128228.4.vs.ENSG00000161180.9	-0.00505723	0.123341	0.63248
ENSG00000128242.11.vs.ENSG00000214491.7	0.00863591	-0.387923	0.901857
ENSG00000128272.13.vs.ENSG00000100335.11	0.000913586	-0.00161106	0.895205
ENSG00000128294.14.vs.ENSG00000100122.5	-0.0161725	-0.211566	0.549574
ENSG00000128394.15.vs.ENSG00000243811.6	0.452511	-0.495531	0.0156584
ENSG00000128422.14.vs.ENSG00000186832.7	0.0052536	-0.0964433	0.238218
ENSG00000128564.6.vs.ENSG00000167011.7	0.00936947	-0.184143	0.911592
ENSG00000128567.15.vs.ENSG00000273489.1	-0.00407017	-0.385149	0.623497
ENSG00000128578.8.vs.ENSG00000158467.15	-0.0247217	-0.00424292	0.374034
ENSG00000128591.14.vs.ENSG00000128596.15	-4.21626e-05	0.125633	0.334754
ENSG00000128607.12.vs.ENSG00000229196.3	0.00582028	-0.497518	0.813889
ENSG00000128610.10.vs.ENSG00000081803.14	-0.0377836	0.00293199	0.819266
ENSG00000128710.5.vs.ENSG00000128709.11	-0.00596096	0.0213781	0.182791
ENSG00000128710.5.vs.ENSG00000170178.6	0.00636665	1.25611	0.401491
ENSG00000128713.12.vs.ENSG00000128714.5	0.0475923	0.00378089	0.109698
ENSG00000128713.12.vs.ENSG00000170178.6	0.0489081	0.846103	0.103712
ENSG00000128714.5.vs.ENSG00000170178.6	0.0152875	1.06969	0.138656
ENSG00000128739.19.vs.ENSG00000279192.1	0.0231188	-0.363491	0.275999
ENSG00000128928.7.vs.ENSG00000140320.10	-0.0083289	0.0236502	0.547238
ENSG00000128944.12.vs.ENSG00000140323.5	-0.0189671	-0.0156602	0.671193
ENSG00000129103.16.vs.ENSG00000206603.1	-0.000922661	-0.732973	0.872663
ENSG00000129158.9.vs.ENSG00000129167.8	0.0835826	-0.17357	0.0095293
ENSG00000129315.8.vs.ENSG00000139620.11	-0.0119011	-0.0127409	0.552893
ENSG00000129354.10.vs.ENSG00000129347.18	-0.00312144	0.0185853	0.359335
ENSG00000129354.10.vs.ENSG00000129355.6	-0.00125775	-0.0195939	0.772593
ENSG00000129450.7.vs.ENSG00000168995.12	0.199057	-0.550314	0.442178
ENSG00000129451.10.vs.ENSG00000186474.14	0.00147867	-0.0492341	0.262675
ENSG00000129646.12.vs.ENSG00000161542.15	0.101359	-0.0360907	0.0800998
ENSG00000129757.11.vs.ENSG00000254827.4	0.0307897	0.0653919	0.0207609
ENSG00000129911.7.vs.ENSG00000079313.10	-0.0262161	0.0161324	0.312016
ENSG00000129946.9.vs.ENSG00000181781.8	0.0141433	0.182303	0.470214
ENSG00000129946.9.vs.ENSG00000183186.6	0.0171071	-0.0559157	0.485989
ENSG00000129991.11.vs.ENSG00000105048.15	0.149271	-0.0295685	0.0262734
ENSG00000130005.10.vs.ENSG00000280486.1	0.0310942	0.495925	0.822649
ENSG00000130203.8.vs.ENSG00000130208.8	0.00244007	-0.0280431	0.331907
ENSG00000130270.15.vs.ENSG00000079313.10	-0.274257	-0.000233155	0.70401
ENSG00000130307.10.vs.ENSG00000160113.5	0.0362297	-0.00342139	0.701957
ENSG00000130402.10.vs.ENSG00000267892.1	0.00035241	0.312242	0.100615
ENSG00000130427.2.vs.ENSG00000146839.17	-4.79826	-1.25216	0.646378
ENSG00000130433.6.vs.ENSG00000142408.2	-0.287355	-0.292973	0.586795
ENSG00000130475.13.vs.ENSG00000179913.9	0.00189633	0.00402225	0.300694
ENSG00000130489.11.vs.ENSG00000177989.12	-0.0178565	-0.0251526	0.269932
ENSG00000130517.12.vs.ENSG00000130513.6	0.0191135	0.00021354	0.036578
ENSG00000130545.14.vs.ENSG00000275234.1	-0.01689	0.0489708	0.262752
ENSG00000130561.15.vs.ENSG00000077044.8	-1.43511	0.00472582	0.722344
ENSG00000130598.14.vs.ENSG00000149043.15	-0.0768265	0.017416	0.979252
ENSG00000130643.7.vs.ENSG00000226699.1	0.974593	1.05893	0.0710709
ENSG00000130643.7.vs.ENSG00000230306.1	1.10237	0.767236	0.0825169
ENSG00000130684.12.vs.ENSG00000236542.1	0.139833	-0.855865	0.359136
ENSG00000130702.12.vs.ENSG00000226332.2	0.00369403	0.0277488	0.00441083
ENSG00000130703.14.vs.ENSG00000130706.11	0.0146909	-0.00198924	0.0352485
ENSG00000130717.11.vs.ENSG00000230289.1	-0.00243051	-2.07279	0.905372
ENSG00000130723.16.vs.ENSG00000130714.14	0.00191242	-0.00239565	0.859626
ENSG00000130779.18.vs.ENSG00000139719.8	-0.00136997	-0.0496899	0.421685
ENSG00000130783.12.vs.ENSG00000206914.1	-1.92044	-2.96954	0.349518
ENSG00000130787.12.vs.ENSG00000130783.12	0.00628307	-1.81985	0.153086
ENSG00000130812.9.vs.ENSG00000267387.1	0.777306	-1.0605	0.376771
ENSG00000130881.12.vs.ENSG00000166359.9	0.00410564	0.629506	0.147565
ENSG00000130943.6.vs.ENSG00000205643.9	-1.1013	-0.0467455	0.108262
ENSG00000130958.10.vs.ENSG00000165244.6	-0.0115836	-0.0302138	0.372254
ENSG00000130985.15.vs.ENSG00000102225.14	0.00479388	-0.0131671	0.0432981
ENSG00000130997.15.vs.ENSG00000123933.13	0.0940071	0.00254418	0.821141
ENSG00000131127.12.vs.ENSG00000281016.1	0.00631108	-1.11423	0.615363
ENSG00000131183.9.vs.ENSG00000169220.16	-5.78868	0.00536022	0.481753
ENSG00000131183.9.vs.ENSG00000198055.9	-5.7786	-0.00857348	0.272022
ENSG00000131188.10.vs.ENSG00000198055.9	-0.0223347	-0.00182192	0.479143
ENSG00000131203.11.vs.ENSG00000188676.12	0.00355078	-1.7793	0.00102818
ENSG00000131263.11.vs.ENSG00000230673.3	-0.00168467	-1.07678	0.112805
ENSG00000131379.8.vs.ENSG00000154781.14	-3.38535	0.0621825	0.145234
ENSG00000131381.11.vs.ENSG00000131368.6	-0.019257	0.005809	0.762998
ENSG00000131408.12.vs.ENSG00000062822.11	0.00141386	0.00247686	0.865488
ENSG00000131459.11.vs.ENSG00000050748.16	-0.031457	-0.0341825	0.184549
ENSG00000131469.11.vs.ENSG00000068079.6	-0.000864562	0.0053183	0.396577
ENSG00000131475.5.vs.ENSG00000126562.15	-0.00245153	0.0044811	0.74012
ENSG00000131591.16.vs.ENSG00000237330.2	0.00691457	-0.142057	0.395212
ENSG00000131748.14.vs.ENSG00000141744.3	0.00532541	-0.0279492	0.0052025
ENSG00000131759.16.vs.ENSG00000094804.8	0.00764438	-0.00161242	0.759806
ENSG00000131759.16.vs.ENSG00000266208.1	0.00858653	-0.0124502	0.752966
ENSG00000131966.12.vs.ENSG00000100567.11	-0.0131962	0.00226503	0.753101
ENSG00000131969.13.vs.ENSG00000258745.1	0.0113225	-3.78364	0.552029
ENSG00000132004.11.vs.ENSG00000095059.14	-0.0542815	0.0105506	0.456781
ENSG00000132004.11.vs.ENSG00000105576.14	-0.0429437	0.00939166	0.27679
ENSG00000132155.10.vs.ENSG00000274514.1	-0.00604791	-3.72845	0.696271
ENSG00000132185.15.vs.ENSG00000162746.13	-0.127413	0.115048	0.817797
ENSG00000132205.9.vs.ENSG00000272625.1	-0.0709037	0.152211	0.0895703
ENSG00000132326.10.vs.ENSG00000144485.9	0.0190925	0.00483763	0.209643
ENSG00000132326.10.vs.ENSG00000232306.1	0.0115074	1.07811	0.545604
ENSG00000132388.11.vs.ENSG00000185722.15	-0.0293035	0.00293077	0.237923
ENSG00000132405.17.vs.ENSG00000173011.11	-0.0223671	-0.00469976	0.380692
ENSG00000132464.10.vs.ENSG00000132467.3	-2.4314	-0.0249322	0.259913
ENSG00000132510.9.vs.ENSG00000182224.10	0.00937726	-0.212736	0.314847
ENSG00000132510.9.vs.ENSG00000183914.13	0.0125445	-0.0473841	0.280497
ENSG00000132510.9.vs.ENSG00000280046.1	0.0128798	-0.179695	0.276404
ENSG00000132535.17.vs.ENSG00000199053.2	0.0138668	-0.209609	0.932368
ENSG00000132554.18.vs.ENSG00000156509.12	-1.3528	-0.0503577	0.640086
ENSG00000132561.12.vs.ENSG00000243504.1	0.00339951	-2.69235	0.496154
ENSG00000132561.12.vs.ENSG00000245970.2	0.00259209	-0.08752	0.538463
ENSG00000132563.14.vs.ENSG00000120733.12	-0.00859001	0.00677715	0.634439
ENSG00000132570.13.vs.ENSG00000113621.13	-0.0615955	-0.0261856	0.240846
ENSG00000132612.15.vs.ENSG00000168807.15	0.00319127	-0.0143032	0.573597
ENSG00000132670.19.vs.ENSG00000125901.5	0.0024507	-0.0030889	0.847782
ENSG00000132680.9.vs.ENSG00000143622.9	0.0131801	-0.0432246	0.194619
ENSG00000132688.10.vs.ENSG00000229953.1	0.0118609	0.0324875	0.000624025
ENSG00000132746.13.vs.ENSG00000239559.2	-0.117432	-0.171205	0.242037
ENSG00000132881.10.vs.ENSG00000233929.1	0.0418531	-0.916649	0.741445
ENSG00000132912.11.vs.ENSG00000086589.10	-0.0237237	0.0184649	0.381461
ENSG00000132953.15.vs.ENSG00000150456.9	-0.00302067	-0.0027635	0.930837
ENSG00000133055.7.vs.ENSG00000133048.11	-6.65761	-0.002254	0.421074
ENSG00000133104.11.vs.ENSG00000242715.6	-0.0190445	0.0423906	0.837604
ENSG00000133138.18.vs.ENSG00000133135.12	-0.0255102	0.00893821	0.0178421
ENSG00000133142.16.vs.ENSG00000279894.1	0.0180621	-0.107119	0.0753154
ENSG00000133193.11.vs.ENSG00000277728.1	-0.0461577	-0.0543339	0.618611
ENSG00000133243.7.vs.ENSG00000099875.13	0.000919507	-0.00127153	0.908494
ENSG00000133250.12.vs.ENSG00000133246.10	-0.0177598	-0.0551898	0.727098
ENSG00000133250.12.vs.ENSG00000142347.15	-0.0155505	-0.0256494	0.411518
ENSG00000133265.9.vs.ENSG00000105063.17	-0.00225335	0.00434422	0.707334
ENSG00000133393.11.vs.ENSG00000133392.15	0.00613924	0.000134686	0.579124
ENSG00000133657.13.vs.ENSG00000178732.5	0.000560144	-0.595823	0.863093
ENSG00000133706.16.vs.ENSG00000173261.7	0.00421378	0.790766	0.47464
ENSG00000133789.13.vs.ENSG00000239470.3	-0.00403441	-0.494882	0.726701
ENSG00000133789.13.vs.ENSG00000246273.5	0.00250707	-0.12168	0.587856
ENSG00000133818.11.vs.ENSG00000254418.1	0.0183872	-9.44792	0.603262
ENSG00000133961.18.vs.ENSG00000258944.1	-0.00549498	-0.223578	0.827626
ENSG00000133962.6.vs.ENSG00000279286.2	-0.145782	-0.729273	0.428009
ENSG00000133983.13.vs.ENSG00000213463.4	0.0130914	-0.0136911	0.596149
ENSG00000134058.9.vs.ENSG00000134056.10	-0.00644474	-0.013563	0.680137
ENSG00000134070.4.vs.ENSG00000157014.9	-0.0138732	0.0375934	0.434017
ENSG00000134201.9.vs.ENSG00000134184.11	-0.161615	0.0196686	0.621237
ENSG00000134242.14.vs.ENSG00000188761.10	-0.163381	0.00277758	0.224489
ENSG00000134243.10.vs.ENSG00000143106.11	-0.000522901	-0.0061131	0.3631
ENSG00000134245.16.vs.ENSG00000143079.13	-0.0196117	-0.00545354	0.812821
ENSG00000134285.9.vs.ENSG00000134287.8	-0.0103767	-0.000201629	0.613812
ENSG00000134285.9.vs.ENSG00000281789.1	-0.00966187	0.339441	0.545649
ENSG00000134287.8.vs.ENSG00000281789.1	-0.000483697	0.479322	0.789203
ENSG00000134330.17.vs.ENSG00000239300.4	-0.0178034	-0.668378	0.436426
ENSG00000134333.12.vs.ENSG00000166796.10	0.000251569	0.189233	0.394292
ENSG00000134375.9.vs.ENSG00000238003.1	-0.00886474	-1.20115	0.485842
ENSG00000134398.11.vs.ENSG00000261266.2	0.00367599	-0.55674	0.627698
ENSG00000134780.8.vs.ENSG00000124920.12	0.0116662	-0.00230587	0.59706
ENSG00000134827.6.vs.ENSG00000134812.6	-0.00195277	-0.065206	0.649591
ENSG00000134830.5.vs.ENSG00000134815.17	-0.0391715	0.0134093	0.453508
ENSG00000134853.10.vs.ENSG00000242670.1	-0.0216713	-36.5071	0.112199
ENSG00000134884.12.vs.ENSG00000125266.6	0.00745594	0.00196244	0.0775187
ENSG00000135040.14.vs.ENSG00000231741.2	-0.0391055	-4.37218	0.242911
ENSG00000135047.13.vs.ENSG00000237747.1	-0.00365046	-3.3012	0.522784
ENSG00000135070.12.vs.ENSG00000187753.11	-0.0462505	-0.150715	0.179167
ENSG00000135114.11.vs.ENSG00000157895.10	-0.0027675	-0.0518524	0.535159
ENSG00000135249.6.vs.ENSG00000223886.3	-0.025311	-1.47783	0.336777
ENSG00000135249.6.vs.ENSG00000272604.1	-0.0267644	0.070621	0.684951
ENSG00000135250.15.vs.ENSG00000272918.1	-0.0137122	-0.129609	0.534939
ENSG00000135372.7.vs.ENSG00000135387.18	0.0167116	-0.00360489	0.010159
ENSG00000135407.9.vs.ENSG00000175215.8	-0.0666781	0.00270425	0.488423
ENSG00000135436.7.vs.ENSG00000257964.1	0.44781	-2.15158	0.729572
ENSG00000135452.8.vs.ENSG00000255737.2	0.00942477	0.00842072	0.826638
ENSG00000135457.8.vs.ENSG00000110925.5	0.0226246	-0.0147824	0.524235
ENSG00000135506.14.vs.ENSG00000255737.2	0.00395512	-0.0209709	0.0973258
ENSG00000135605.11.vs.ENSG00000074966.9	0.072748	-0.318014	0.718345
ENSG00000135740.15.vs.ENSG00000196155.11	-0.188368	0.0156782	0.0421051
ENSG00000135821.15.vs.ENSG00000203730.2	-0.000414903	-1.96333	0.703757
ENSG00000135828.10.vs.ENSG00000143333.6	-0.0396329	0.00475301	0.632829
ENSG00000135838.12.vs.ENSG00000135829.15	-0.0356546	-0.000355044	0.590977
ENSG00000135916.14.vs.ENSG00000232520.1	-0.000117004	-2.08762	0.846039
ENSG00000135919.11.vs.ENSG00000228802.1	0.0028764	0.575505	0.657897
ENSG00000135925.7.vs.ENSG00000115596.3	0.0912049	-0.0563638	0.0385486
ENSG00000136059.13.vs.ENSG00000200579.1	-0.0032685	0.435184	0.728665
ENSG00000136114.14.vs.ENSG00000136100.11	-0.0298272	0.00814314	0.300864
ENSG00000136147.15.vs.ENSG00000236577.1	0.00529991	-0.69416	0.899309
ENSG00000136240.8.vs.ENSG00000231359.3	-0.00279032	1.79515	0.050881
ENSG00000136273.10.vs.ENSG00000164744.11	-0.0322007	-1.25116	0.526604
ENSG00000136485.13.vs.ENSG00000136463.7	0.00269414	-0.0100784	0.73564
ENSG00000136485.13.vs.ENSG00000173826.13	0.00110723	0.289051	0.216895
ENSG00000136628.16.vs.ENSG00000196660.9	-0.00246812	0.215634	0.521234
ENSG00000136631.11.vs.ENSG00000023902.12	-0.0215737	-0.0137331	0.491871
ENSG00000136807.10.vs.ENSG00000136877.13	0.0333771	-0.0141873	0.320586
ENSG00000136811.15.vs.ENSG00000119392.13	0.0210222	-0.00165881	0.249891
ENSG00000136811.15.vs.ENSG00000228510.2	0.0197783	-4.129	0.216323
ENSG00000136819.13.vs.ENSG00000136827.11	0.0234097	-0.0109181	0.226943
ENSG00000136828.17.vs.ENSG00000136895.17	0.0524962	-0.0761364	0.0865074
ENSG00000136840.17.vs.ENSG00000160408.13	-0.00425296	0.00116768	0.887903
ENSG00000136840.17.vs.ENSG00000167103.10	-0.00565856	0.296336	0.678459
ENSG00000136856.16.vs.ENSG00000136895.17	-0.00153104	0.0643121	0.720672
ENSG00000136877.13.vs.ENSG00000225032.4	-0.00226745	0.147951	0.499948
ENSG00000136883.11.vs.ENSG00000106927.10	0.00820956	0.0270359	0.0147806
ENSG00000136908.16.vs.ENSG00000167103.10	-0.00630659	0.311636	0.623006
ENSG00000136908.16.vs.ENSG00000167106.10	-0.00748841	0.00506462	0.560714
ENSG00000136932.12.vs.ENSG00000136929.11	-0.164834	0.219008	0.0949272
ENSG00000136982.5.vs.ENSG00000064313.10	0.00498666	-0.0101667	0.8322
ENSG00000137054.14.vs.ENSG00000234160.1	0.00207053	0.0609551	0.958546
ENSG00000137090.10.vs.ENSG00000064218.4	-0.0118928	0.105361	0.647367
ENSG00000137098.12.vs.ENSG00000204930.8	0.243271	-0.283766	0.791169
ENSG00000137135.16.vs.ENSG00000137078.7	-0.0310167	0.0144357	0.549893
ENSG00000137135.16.vs.ENSG00000198467.12	-0.0309149	-0.000102132	0.612768
ENSG00000137145.19.vs.ENSG00000273226.1	-0.00838943	0.438395	0.315838
ENSG00000137154.11.vs.ENSG00000272842.1	-0.000193834	0.063377	0.350873
ENSG00000137161.15.vs.ENSG00000231113.2	0.00301477	-0.0409271	0.885557
ENSG00000137204.13.vs.ENSG00000146216.10	0.157194	-0.0884693	0.602468
ENSG00000137204.13.vs.ENSG00000219222.1	-0.38453	-0.666403	0.308532
ENSG00000137207.10.vs.ENSG00000271754.1	0.00125901	0.979426	0.511636
ENSG00000137275.12.vs.ENSG00000137274.11	0.0204232	0.0122681	0.535811
ENSG00000137331.11.vs.ENSG00000201988.2	0.00282681	0.120499	0.0876503
ENSG00000137337.13.vs.ENSG00000137404.13	0.0147002	-0.0139792	0.216947
ENSG00000137337.13.vs.ENSG00000230449.1	0.0148112	3.32702	0.169836
ENSG00000137337.13.vs.ENSG00000272540.1	0.00695573	0.9086	0.0820797
ENSG00000137404.13.vs.ENSG00000230449.1	-0.00934454	2.95794	0.643627
ENSG00000137460.7.vs.ENSG00000231841.1	-0.00299378	0.299451	0.94581
ENSG00000137486.15.vs.ENSG00000279117.1	-0.00976951	-0.0463548	0.356848
ENSG00000137496.16.vs.ENSG00000251143.1	-0.0116513	0.132628	0.78143
ENSG00000137504.12.vs.ENSG00000179071.4	0.0129178	0.552461	0.120444
ENSG00000137561.4.vs.ENSG00000137563.10	-0.102742	0.000805252	0.231049
ENSG00000137709.8.vs.ENSG00000181264.7	-0.152121	0.220794	0.0771299
ENSG00000137709.8.vs.ENSG00000184232.7	-0.128967	-0.00131113	0.508651
ENSG00000137752.21.vs.ENSG00000137757.9	-0.0145418	-0.038577	0.0505333
ENSG00000137752.21.vs.ENSG00000204397.6	-0.0191768	-3.81126e-05	0.0606537
ENSG00000137802.12.vs.ENSG00000243708.7	0.00381232	0.637917	0.490439
ENSG00000137817.15.vs.ENSG00000067225.16	0.0294946	0.000245447	0.0675994
ENSG00000137825.9.vs.ENSG00000137815.13	0.00210933	0.00169143	0.983469
ENSG00000137875.4.vs.ENSG00000069966.17	0.332563	0.027765	0.00626598
ENSG00000137875.4.vs.ENSG00000259712.1	0.31936	-0.251136	0.00942105
ENSG00000137876.8.vs.ENSG00000279145.1	-0.00412335	-0.657344	0.364187
ENSG00000137880.5.vs.ENSG00000188277.9	0.0109371	0.230953	0.121558
ENSG00000137959.14.vs.ENSG00000137965.9	-0.0132412	0.0128797	0.837441
ENSG00000138036.17.vs.ENSG00000152527.12	0.0490655	0.0203245	0.207622
ENSG00000138079.12.vs.ENSG00000226972.2	0.00165486	-3.91302	0.22085
ENSG00000138271.5.vs.ENSG00000181631.6	-0.16991	-0.518886	0.0669864
ENSG00000138279.14.vs.ENSG00000229659.1	-0.00707143	-0.197203	0.362636
ENSG00000138303.16.vs.ENSG00000107742.11	-0.00992526	-0.0290661	0.311197
ENSG00000138315.11.vs.ENSG00000156026.13	0.0369788	-0.0107115	0.33202
ENSG00000138346.13.vs.ENSG00000204130.11	0.00266965	-0.0315172	0.770435
ENSG00000138378.16.vs.ENSG00000280083.1	-0.352827	-1.04969	0.133095
ENSG00000138381.8.vs.ENSG00000151687.13	0.00239248	-0.201503	0.639692
ENSG00000138468.14.vs.ENSG00000081148.11	0.109303	-3.07969	0.220346
ENSG00000138592.12.vs.ENSG00000259465.2	-0.0140491	-5.08945	0.538509
ENSG00000138613.12.vs.ENSG00000166128.11	0.0766738	-0.0544444	0.131011
ENSG00000138615.5.vs.ENSG00000166855.8	0.00683781	-0.0100654	0.673948
ENSG00000138641.14.vs.ENSG00000248019.2	-0.00790936	-0.0705301	0.828457
ENSG00000138759.16.vs.ENSG00000138772.11	0.00544099	-0.00324421	0.595957
ENSG00000138778.10.vs.ENSG00000164039.13	-0.0170575	-0.00231661	0.725523
ENSG00000138794.8.vs.ENSG00000123739.9	-0.000407363	-0.0416076	0.0743567
ENSG00000138834.11.vs.ENSG00000206053.11	0.00675823	-0.000996299	0.368057
ENSG00000139112.9.vs.ENSG00000134539.15	0.0168595	-0.230354	0.123612
ENSG00000139131.11.vs.ENSG00000276148.1	-0.036872	0.256821	0.225787
ENSG00000139193.3.vs.ENSG00000224906.3	-0.160518	-2.39569	0.238421
ENSG00000139223.2.vs.ENSG00000177627.8	-4.53854	-1.89791	0.418551
ENSG00000139289.12.vs.ENSG00000187109.12	0.00151845	-0.00123801	0.536679
ENSG00000139508.13.vs.ENSG00000233588.1	-0.0170662	-0.988664	0.379711
ENSG00000139549.2.vs.ENSG00000139636.14	0.75088	0.0114695	0.324609
ENSG00000139567.11.vs.ENSG00000258021.1	-0.00547684	0.296112	0.618011
ENSG00000139572.3.vs.ENSG00000161642.16	-0.370572	0.0283756	0.293562
ENSG00000139597.15.vs.ENSG00000244754.7	-0.00575109	0.000396234	0.982063
ENSG00000139626.14.vs.ENSG00000172819.15	-0.0183835	0.00139973	0.937197
ENSG00000139726.9.vs.ENSG00000130783.12	0.00111833	-2.15454	0.367239
ENSG00000139890.8.vs.ENSG00000197324.7	0.182657	-0.00141944	0.462444
ENSG00000139914.6.vs.ENSG00000092010.13	0.225422	-0.0031965	0.316296
ENSG00000139998.13.vs.ENSG00000176153.11	0.00166891	0.000112047	0.847615
ENSG00000140307.9.vs.ENSG00000140299.10	-0.00963032	-0.00187692	0.622942
ENSG00000140326.11.vs.ENSG00000128881.15	0.0640625	-0.0412469	0.266332
ENSG00000140367.10.vs.ENSG00000167196.12	-0.00978974	-0.0259285	0.290736
ENSG00000140386.11.vs.ENSG00000259514.1	0.0264875	2.33563	0.0783075
ENSG00000140396.11.vs.ENSG00000253173.3	-0.0156978	-2.75168	0.130525
ENSG00000140455.15.vs.ENSG00000197361.6	-0.031163	-0.00470914	0.24675
ENSG00000140545.13.vs.ENSG00000140511.10	0.00548562	-0.0341036	0.301606
ENSG00000140553.15.vs.ENSG00000196547.13	0.00124006	0.00475884	0.840286
ENSG00000140575.11.vs.ENSG00000259262.1	-0.00255902	2.68357	0.297804
ENSG00000140853.14.vs.ENSG00000087237.9	-0.00313951	-0.262627	0.543091
ENSG00000140854.11.vs.ENSG00000276166.1	0.00640463	3.02522	0.228802
ENSG00000140905.8.vs.ENSG00000166473.15	0.0694777	-0.0490347	0.550564
ENSG00000140950.14.vs.ENSG00000261286.1	0.0115865	0.199616	0.148149
ENSG00000140961.11.vs.ENSG00000103154.8	0.0511614	0.851135	0.052427
ENSG00000140983.12.vs.ENSG00000103269.12	0.00751102	-0.0584813	0.522189
ENSG00000140990.13.vs.ENSG00000179580.8	-0.00519768	-0.349953	0.520233
ENSG00000140992.17.vs.ENSG00000162066.13	0.0159131	-0.00393863	0.414363
ENSG00000140995.15.vs.ENSG00000258947.5	0.0163854	0.0809045	0.0596995
ENSG00000141002.17.vs.ENSG00000204991.9	0.00195033	0.0103943	0.0534782
ENSG00000141030.11.vs.ENSG00000154803.11	-0.0168632	0.0058469	0.267359
ENSG00000141030.11.vs.ENSG00000264187.1	-0.016733	1.282	0.240501
ENSG00000141068.12.vs.ENSG00000168961.15	0.0485075	-0.000157416	0.0761144
ENSG00000141096.4.vs.ENSG00000167261.12	-0.604793	-0.151439	0.647277
ENSG00000141101.11.vs.ENSG00000260290.2	0.00506426	-0.242043	0.506487
ENSG00000141198.12.vs.ENSG00000275710.1	-0.0186714	1.26114	0.413581
ENSG00000141298.16.vs.ENSG00000167549.17	-0.0217393	0.222339	0.298526
ENSG00000141391.12.vs.ENSG00000267199.1	-0.0944394	0.372183	0.40257
ENSG00000141503.14.vs.ENSG00000205710.3	0.00284057	-0.257379	0.545896
ENSG00000141564.12.vs.ENSG00000213128.3	0.0118535	-8.30739	0.139372
ENSG00000141574.6.vs.ENSG00000173762.6	0.00365316	-0.0823475	0.275557
ENSG00000141738.12.vs.ENSG00000141736.12	0.0079804	-0.000343815	9.3447e-06
ENSG00000141854.6.vs.ENSG00000228887.3	0.00891253	-0.442442	0.383361
ENSG00000141858.10.vs.ENSG00000188032.8	-0.0186964	-1.81919	0.17385
ENSG00000141956.12.vs.ENSG00000157617.15	0.0634373	-0.0396923	0.209635
ENSG00000141959.15.vs.ENSG00000184441.4	0.00019947	-0.0816633	0.935412
ENSG00000141985.8.vs.ENSG00000269318.1	-0.000832377	-0.293321	0.904634
ENSG00000142002.15.vs.ENSG00000074842.6	0.0051352	-0.00220729	0.625788
ENSG00000142188.15.vs.ENSG00000177692.10	-0.0136714	-1.14683	0.0715357
ENSG00000142188.15.vs.ENSG00000215088.3	-0.0215357	-3.71368	0.143042
ENSG00000142252.9.vs.ENSG00000104859.13	-0.105104	0.0188629	0.0661472
ENSG00000142303.12.vs.ENSG00000142347.15	0.0703198	-0.0399549	0.29159
ENSG00000142303.12.vs.ENSG00000279396.1	-0.00639847	0.596386	0.884003
ENSG00000142319.17.vs.ENSG00000279908.1	-0.0329814	-0.00297401	0.996437
ENSG00000142327.10.vs.ENSG00000188542.8	-0.000218835	-0.108536	0.764955
ENSG00000142515.13.vs.ENSG00000267968.1	0.169851	-0.743169	0.0844913
ENSG00000142534.5.vs.ENSG00000142541.15	-0.000370356	6.40334e-05	0.516309
ENSG00000142556.17.vs.ENSG00000197619.12	0.0181551	-0.0718943	0.712728
ENSG00000142556.17.vs.ENSG00000256087.5	0.0103704	-0.0115817	0.893272
ENSG00000142609.16.vs.ENSG00000178821.11	0.278882	-0.0771031	0.0519605
ENSG00000142609.16.vs.ENSG00000233542.1	0.33693	-0.235009	0.150584
ENSG00000142623.9.vs.ENSG00000142619.4	0.0927657	0.00533644	0.309537
ENSG00000142675.16.vs.ENSG00000142684.7	0.0190502	-0.118487	0.258746
ENSG00000142677.3.vs.ENSG00000142661.17	0.00612485	0.0015845	0.577066
ENSG00000142684.7.vs.ENSG00000197245.4	-0.0764265	-0.0872451	0.481201
ENSG00000142748.11.vs.ENSG00000142733.13	-0.417649	-0.0155296	0.266614
ENSG00000142748.11.vs.ENSG00000174950.9	-0.472093	-0.384952	0.330385
ENSG00000142789.18.vs.ENSG00000219073.6	-8.92064	-0.197762	0.262715
ENSG00000142959.4.vs.ENSG00000234093.3	0.0473825	-0.73442	0.012499
ENSG00000143061.16.vs.ENSG00000116815.14	0.0241065	-0.0522226	0.17385
ENSG00000143093.13.vs.ENSG00000168710.16	0.0397285	-0.00620579	0.127066
ENSG00000143199.16.vs.ENSG00000143158.9	0.0173581	-0.00185566	0.947405
ENSG00000143217.8.vs.ENSG00000186517.12	-0.0154437	-0.0257409	0.332647
ENSG00000143224.16.vs.ENSG00000143222.10	0.0170351	-0.000631851	0.918044
ENSG00000143315.6.vs.ENSG00000177807.6	-0.00304437	0.0939367	0.89843
ENSG00000143318.11.vs.ENSG00000132681.15	0.350954	-1.78953	0.686168
ENSG00000143318.11.vs.ENSG00000162734.11	0.423557	-0.00732354	0.297845
ENSG00000143320.7.vs.ENSG00000223356.1	-0.018191	0.956209	0.543032
ENSG00000143367.14.vs.ENSG00000143375.13	0.0165249	0.00588639	0.0471472
ENSG00000143368.9.vs.ENSG00000159164.8	0.00409001	-0.0745619	0.690643
ENSG00000143376.11.vs.ENSG00000227045.1	-0.0246639	1.62111	0.214899
ENSG00000143379.11.vs.ENSG00000231073.1	0.0273544	-1.43949	0.338579
ENSG00000143384.11.vs.ENSG00000274963.1	0.00224342	-1.33201	0.313897
ENSG00000143384.11.vs.ENSG00000277452.1	0.00243732	-2.59119	0.257935
ENSG00000143398.18.vs.ENSG00000159352.14	-0.00475678	0.00241985	0.670594
ENSG00000143412.8.vs.ENSG00000231073.1	0.102954	-0.738799	0.0269278
ENSG00000143437.19.vs.ENSG00000143387.11	-0.00656232	-0.00557677	0.425106
ENSG00000143452.14.vs.ENSG00000163131.9	0.0267996	-0.00410671	0.169809
ENSG00000143545.7.vs.ENSG00000143552.8	-0.00732009	-1.04709	0.506769
ENSG00000143546.8.vs.ENSG00000237008.2	-0.052657	-8.58877	0.454802
ENSG00000143614.7.vs.ENSG00000198837.8	-0.0155805	0.0143972	0.467685
ENSG00000143622.9.vs.ENSG00000207475.1	-0.019176	-1.04079	0.564246
ENSG00000143653.9.vs.ENSG00000260855.1	-0.0128924	-0.310772	0.331191
ENSG00000143793.11.vs.ENSG00000162910.17	0.0696457	-0.0252085	0.257135
ENSG00000143793.11.vs.ENSG00000224566.2	-0.00611208	-0.799651	0.741221
ENSG00000143811.15.vs.ENSG00000243709.1	0.0125243	0.0014253	0.125812
ENSG00000143845.13.vs.ENSG00000143839.13	0.099508	-0.014854	0.149829
ENSG00000143847.14.vs.ENSG00000163444.10	0.257629	-0.0105134	0.00604304
ENSG00000143862.6.vs.ENSG00000143851.14	0.0110304	-0.0118445	0.545319
ENSG00000143952.18.vs.ENSG00000251775.1	0.0116419	-0.84339	0.722412
ENSG00000143977.12.vs.ENSG00000035141.6	-0.00703029	0.0094535	0.537069
ENSG00000144028.13.vs.ENSG00000230747.1	0.0023651	-6.2203	0.0527457
ENSG00000144045.12.vs.ENSG00000115289.11	0.0242443	0.00914007	0.513306
ENSG00000144045.12.vs.ENSG00000115318.10	0.0242517	-0.00889577	0.522876
ENSG00000144061.11.vs.ENSG00000144063.3	0.124261	0.0169424	0.306023
ENSG00000144061.11.vs.ENSG00000175701.9	0.0845547	-0.00991774	0.551697
ENSG00000144230.15.vs.ENSG00000169994.17	0.338222	0.00487227	0.0602927
ENSG00000144488.13.vs.ENSG00000168427.8	0.196017	-0.136913	0.00172052
ENSG00000144550.11.vs.ENSG00000163719.17	0.291619	-0.0111518	0.00791981
ENSG00000144579.6.vs.ENSG00000018280.15	0.00174851	-0.0121737	0.783862
ENSG00000144671.9.vs.ENSG00000172940.10	0.878724	-0.426589	0.614604
ENSG00000144713.11.vs.ENSG00000272263.1	-0.000768687	-0.777351	0.353418
ENSG00000144744.15.vs.ENSG00000144747.13	-0.00217557	0.000157673	0.976972
ENSG00000144791.8.vs.ENSG00000011376.8	-0.0130238	0.0116227	0.59868
ENSG00000144815.13.vs.ENSG00000182504.9	0.0448399	-0.0591814	0.572361
ENSG00000144827.7.vs.ENSG00000144824.18	-0.00692408	-0.00697567	0.860363
ENSG00000144827.7.vs.ENSG00000144834.11	-0.00570232	0.30757	0.527985
ENSG00000144867.10.vs.ENSG00000091513.13	0.00102564	0.0261135	0.827174
ENSG00000144868.12.vs.ENSG00000170819.4	-0.350201	-2.93786	0.251604
ENSG00000145050.14.vs.ENSG00000259956.1	0.00256116	0.00589106	0.671588
ENSG00000145107.14.vs.ENSG00000163960.10	-0.329684	0.00053637	0.883321
ENSG00000145569.5.vs.ENSG00000248791.1	0.00480148	-0.245102	0.5347
ENSG00000145685.12.vs.ENSG00000113273.14	-0.0454306	0.0709375	0.0322082
ENSG00000145730.19.vs.ENSG00000175749.11	0.00486299	-2.92631	0.276035
ENSG00000145757.14.vs.ENSG00000250240.4	0.884169	-0.753349	0.694088
ENSG00000145833.14.vs.ENSG00000164615.4	0.0125575	-0.00892732	0.432355
ENSG00000145861.7.vs.ENSG00000135083.13	-0.347224	-0.0238349	0.337746
ENSG00000145911.5.vs.ENSG00000145916.17	-0.0215238	0.00787253	0.841522
ENSG00000146001.5.vs.ENSG00000120327.6	-0.26031	-7.29944e-05	0.887732
ENSG00000146001.5.vs.ENSG00000262096.2	-0.523578	0.460773	0.83978
ENSG00000146007.9.vs.ENSG00000199990.1	0.0249425	-0.513561	0.0527
ENSG00000146083.10.vs.ENSG00000243959.3	0.0045508	-3.79004	0.457632
ENSG00000146112.10.vs.ENSG00000204560.8	-0.00366916	0.0264628	0.0777191
ENSG00000146112.10.vs.ENSG00000230449.1	-0.00199749	2.84573	0.665248
ENSG00000146221.9.vs.ENSG00000124608.4	-2.80081	0.0105471	0.439844
ENSG00000146285.12.vs.ENSG00000280135.1	0.0232459	0.0264939	0.870135
ENSG00000146409.9.vs.ENSG00000112303.12	-0.00737511	-0.104626	0.466109
ENSG00000146410.10.vs.ENSG00000029363.14	0.0126587	0.00143585	0.890332
ENSG00000146410.10.vs.ENSG00000237596.5	0.00755131	-0.664495	0.753804
ENSG00000146416.15.vs.ENSG00000217648.1	-0.000104291	0.425807	0.489223
ENSG00000146426.16.vs.ENSG00000171217.5	0.0991061	-0.311916	0.218657
ENSG00000146576.11.vs.ENSG00000236609.3	-0.0021354	0.014729	0.915804
ENSG00000146729.8.vs.ENSG00000178665.13	-0.00379023	0.124288	0.40277
ENSG00000146859.6.vs.ENSG00000272941.1	-0.000276528	-1.00839	0.579092
ENSG00000146872.16.vs.ENSG00000087995.14	0.0166813	-0.0509505	0.27154
ENSG00000146918.18.vs.ENSG00000224324.1	0.00833744	-7.80706	0.449185
ENSG00000147036.10.vs.ENSG00000047597.5	-0.0225745	-0.0175448	0.311607
ENSG00000147099.18.vs.ENSG00000067177.13	0.0381529	-0.0270029	0.262468
ENSG00000147162.12.vs.ENSG00000147174.10	0.00235248	-0.0203405	0.38078
ENSG00000147439.10.vs.ENSG00000253200.1	0.0678355	0.11326	0.0421922
ENSG00000147457.12.vs.ENSG00000104679.9	-0.00362656	0.0100895	0.899592
ENSG00000147471.10.vs.ENSG00000020181.16	-0.0123971	-0.000235701	0.378612
ENSG00000147586.8.vs.ENSG00000076554.14	-0.0116015	-0.000387171	0.860183
ENSG00000147601.12.vs.ENSG00000253636.1	0.0212111	-0.0613611	0.534017
ENSG00000147604.12.vs.ENSG00000250295.5	0.000135481	-0.120432	0.795301
ENSG00000147650.10.vs.ENSG00000279138.1	-0.0338104	0.0359565	0.628136
ENSG00000147654.13.vs.ENSG00000205038.10	-0.00498262	0.171319	0.332208
ENSG00000147669.9.vs.ENSG00000104450.11	-0.0125176	0.000826526	0.525527
ENSG00000147804.8.vs.ENSG00000160948.12	-0.000233816	-0.00166321	0.832073
ENSG00000147872.8.vs.ENSG00000147874.9	-0.00112973	-0.00285401	0.961432
ENSG00000147912.11.vs.ENSG00000175768.11	0.0201862	-0.00588856	0.897743
ENSG00000148180.15.vs.ENSG00000243738.3	0.000332982	-0.215194	0.850235
ENSG00000148200.15.vs.ENSG00000136931.8	0.0165363	-0.275583	0.77404
ENSG00000148225.14.vs.ENSG00000165188.12	-0.194095	-0.00348064	0.145002
ENSG00000148308.16.vs.ENSG00000196205.8	0.00656479	-0.00875602	0.356908
ENSG00000148335.13.vs.ENSG00000234789.1	0.00779448	-3.88433	0.525997
ENSG00000148346.10.vs.ENSG00000171159.4	-0.000382371	-0.00225049	0.411907
ENSG00000148362.9.vs.ENSG00000107317.10	-0.0046104	0.00439204	0.84496
ENSG00000148362.9.vs.ENSG00000214402.6	-0.00459688	-0.15931	0.894787
ENSG00000148399.10.vs.ENSG00000165724.5	0.023803	-0.016419	0.609024
ENSG00000148483.8.vs.ENSG00000260314.2	-0.0448379	-0.0211772	0.152127
ENSG00000148484.16.vs.ENSG00000107611.13	0.000741955	-0.51101	0.552251
ENSG00000148600.13.vs.ENSG00000188373.4	-0.000761783	-0.00321167	0.488933
ENSG00000148730.6.vs.ENSG00000280401.1	-0.00204203	1.48569	0.125056
ENSG00000148803.10.vs.ENSG00000226699.1	-0.00954423	1.05585	0.207057
ENSG00000148832.13.vs.ENSG00000148824.17	-0.0690253	0.085997	0.224187
ENSG00000148948.6.vs.ENSG00000279675.1	-0.0502102	-0.422966	0.961583
ENSG00000148965.7.vs.ENSG00000134339.7	1.9293	-0.106081	0.842652
ENSG00000149196.14.vs.ENSG00000255222.1	0.00958489	-2.19897	0.753984
ENSG00000149243.14.vs.ENSG00000158555.13	0.0205583	0.00268688	0.0753677
ENSG00000149260.13.vs.ENSG00000137474.18	-0.00209036	0.0239434	0.131196
ENSG00000149262.15.vs.ENSG00000241782.1	-0.018458	-2.44035	0.712099
ENSG00000149262.15.vs.ENSG00000254459.1	-0.0283661	-3.11206	0.601678
ENSG00000149262.15.vs.ENSG00000255449.1	-0.0288604	-1.97719	0.473745
ENSG00000149300.8.vs.ENSG00000170276.5	1.65006	0.300303	0.65086
ENSG00000149480.5.vs.ENSG00000149016.14	-0.0054535	0.0652373	0.348198
ENSG00000149489.7.vs.ENSG00000254964.1	-0.114155	-4.19707	0.733578
ENSG00000149541.8.vs.ENSG00000089597.15	0.000927072	0.00168151	0.570268
ENSG00000149541.8.vs.ENSG00000149499.10	0.00665103	-0.00481944	0.916083
ENSG00000149564.10.vs.ENSG00000255045.1	0.000221013	-0.167553	0.987177
ENSG00000149575.5.vs.ENSG00000177098.7	0.14251	0.0371492	0.772545
ENSG00000149577.14.vs.ENSG00000280143.1	-0.00135821	0.00600996	0.950034
ENSG00000149591.15.vs.ENSG00000149577.14	0.000142391	-0.00157669	0.950476
ENSG00000149634.4.vs.ENSG00000271984.1	0.300894	-4.99028	0.0886539
ENSG00000149639.13.vs.ENSG00000149636.14	0.00775291	0.00630861	0.372707
ENSG00000149646.11.vs.ENSG00000025293.14	-0.247679	0.00251388	0.81182
ENSG00000149782.10.vs.ENSG00000173486.11	0.000335886	0.00585079	0.564918
ENSG00000149798.4.vs.ENSG00000014138.7	-0.00181658	-0.00546716	0.934579
ENSG00000150281.6.vs.ENSG00000260083.1	0.199931	-0.170729	0.00285594
ENSG00000150768.14.vs.ENSG00000150764.12	-0.00645579	-0.0324151	0.393158
ENSG00000150783.8.vs.ENSG00000197580.10	-1.85505	0.171001	0.689189
ENSG00000150783.8.vs.ENSG00000214264.4	-0.881022	-1.88263	0.706843
ENSG00000150787.6.vs.ENSG00000197580.10	-0.0403221	-0.000846902	0.434406
ENSG00000151117.7.vs.ENSG00000254966.1	-0.134749	0.470066	0.314756
ENSG00000151376.15.vs.ENSG00000278989.1	0.0062136	-0.027268	0.94288
ENSG00000151651.14.vs.ENSG00000130640.12	-0.0119306	0.00477119	0.603047
ENSG00000152253.7.vs.ENSG00000073734.8	-0.0220904	-0.600449	0.64366
ENSG00000152454.3.vs.ENSG00000196724.11	-0.0851242	0.133625	0.810064
ENSG00000152454.3.vs.ENSG00000243234.1	-0.0595902	-6.26623	0.446439
ENSG00000152467.8.vs.ENSG00000176293.18	-2.86134	0.188897	0.771947
ENSG00000152475.6.vs.ENSG00000266640.1	-0.15905	-0.129086	0.51577
ENSG00000152556.14.vs.ENSG00000274124.1	-0.000912282	-0.220212	0.990435
ENSG00000152672.6.vs.ENSG00000116031.8	0.183995	-0.33838	0.77564
ENSG00000153002.10.vs.ENSG00000163751.3	-0.37456	-0.039121	0.38166
ENSG00000153093.17.vs.ENSG00000153094.20	0.344258	-0.0503929	0.0740683
ENSG00000153113.22.vs.ENSG00000248734.2	-0.000837207	-0.0588699	0.86503
ENSG00000153208.15.vs.ENSG00000236307.2	-0.0321454	0.331904	0.611249
ENSG00000153283.11.vs.ENSG00000240891.5	-0.18131	0.0850408	0.119213
ENSG00000153363.11.vs.ENSG00000082512.13	-0.0221462	0.00974516	0.213993
ENSG00000153363.11.vs.ENSG00000238137.2	-0.0185506	-2.58314	0.366633
ENSG00000153790.10.vs.ENSG00000172115.7	0.0490157	-0.00266699	0.441502
ENSG00000153982.9.vs.ENSG00000167447.11	0.0483549	-0.0598116	0.401801
ENSG00000154025.14.vs.ENSG00000279825.1	0.227679	0.598923	0.768881
ENSG00000154059.8.vs.ENSG00000134489.6	-0.0242011	-3.86586	0.139557
ENSG00000154079.5.vs.ENSG00000082269.15	-0.0463959	-0.00133773	0.332413
ENSG00000154252.11.vs.ENSG00000180902.15	0.0246903	0.00392106	0.332885
ENSG00000154262.11.vs.ENSG00000154263.16	-0.180334	0.169348	0.566949
ENSG00000154274.13.vs.ENSG00000174145.7	-0.0240856	-0.216942	0.548662
ENSG00000154328.14.vs.ENSG00000079459.11	-0.0233485	0.000320476	0.661592
ENSG00000154328.14.vs.ENSG00000136574.16	-0.0205669	-0.00284045	0.673216
ENSG00000154328.14.vs.ENSG00000227203.3	-0.015958	-2.02051	0.232705
ENSG00000154473.16.vs.ENSG00000188816.3	-0.00306008	0.297426	0.00364219
ENSG00000154589.5.vs.ENSG00000253833.1	-0.368331	-2.1873	0.116392
ENSG00000154719.12.vs.ENSG00000260583.1	-0.0147104	-0.914095	0.641054
ENSG00000154760.12.vs.ENSG00000172123.11	0.00814594	-0.267458	0.423066
ENSG00000155066.14.vs.ENSG00000115041.11	0.000831747	0.245753	0.154618
ENSG00000155366.15.vs.ENSG00000225075.1	-0.00143962	-0.158747	0.831674
ENSG00000155506.15.vs.ENSG00000277039.1	0.00393559	-0.0951565	0.391856
ENSG00000155542.10.vs.ENSG00000271828.1	-0.0779758	-0.980713	0.185323
ENSG00000155545.18.vs.ENSG00000225230.1	-0.00522796	-1.54577	0.813808
ENSG00000155640.6.vs.ENSG00000231025.1	-0.07596	0.0567772	0.345847
ENSG00000155754.13.vs.ENSG00000155755.17	-2.7828	-0.0238645	0.395821
ENSG00000156239.10.vs.ENSG00000215005.2	-0.014334	-1.10581	0.881407
ENSG00000156253.5.vs.ENSG00000176054.6	-0.0321218	0.621846	0.506974
ENSG00000156304.13.vs.ENSG00000273271.1	-0.003559	0.178139	0.843082
ENSG00000156413.12.vs.ENSG00000171124.11	-0.001822	0.00411263	0.234658
ENSG00000156486.7.vs.ENSG00000272321.1	-1.79003	-1.05792	0.736882
ENSG00000156502.12.vs.ENSG00000122958.13	-0.0274077	1.96236e-05	0.46165
ENSG00000156515.20.vs.ENSG00000156510.12	-0.00521785	0.00838933	0.0832096
ENSG00000156521.12.vs.ENSG00000042286.13	-0.0262762	0.0234268	0.0714587
ENSG00000156587.14.vs.ENSG00000240371.1	-0.0051401	-0.947353	0.184627
ENSG00000156860.14.vs.ENSG00000156858.10	0.0143475	0.00975351	0.0169014
ENSG00000156973.12.vs.ENSG00000237641.1	-0.0283183	0.0861921	0.690657
ENSG00000156983.14.vs.ENSG00000114026.20	0.0364933	-0.0244446	0.355058
ENSG00000156983.14.vs.ENSG00000144550.11	0.0239277	0.2627	0.00708324
ENSG00000157014.9.vs.ENSG00000231177.4	0.0423978	-0.514054	0.38381
ENSG00000157014.9.vs.ENSG00000240288.6	0.0315096	0.0448361	0.506961
ENSG00000157020.16.vs.ENSG00000157087.15	-0.00166733	-0.164015	0.858178
ENSG00000157077.13.vs.ENSG00000272100.1	-0.00242846	0.335683	0.976745
ENSG00000157214.12.vs.ENSG00000105792.18	-0.0197909	-0.0775316	0.362393
ENSG00000157306.13.vs.ENSG00000129460.14	0.0634294	0.0254847	0.475229
ENSG00000157315.4.vs.ENSG00000132604.9	0.176731	0.0177703	0.290829
ENSG00000157322.15.vs.ENSG00000198373.11	0.0549265	0.00678385	0.697941
ENSG00000157399.13.vs.ENSG00000006756.14	0.00396939	0.00097625	0.284518
ENSG00000157510.12.vs.ENSG00000164284.13	-0.00889447	-0.0334589	0.283282
ENSG00000157856.9.vs.ENSG00000138018.16	0.402924	-0.00279741	0.651436
ENSG00000157873.16.vs.ENSG00000225931.3	-0.00026975	0.527581	0.791045
ENSG00000157881.12.vs.ENSG00000197921.5	0.0108617	-0.427093	0.581375
ENSG00000157992.11.vs.ENSG00000235267.1	-0.00278269	-0.64147	0.820347
ENSG00000158014.13.vs.ENSG00000158022.6	-0.0560768	-0.825263	0.472582
ENSG00000158042.8.vs.ENSG00000241678.1	0.00208738	-0.150364	0.957987
ENSG00000158050.4.vs.ENSG00000188886.3	0.033726	-1.80556	0.0204556
ENSG00000158158.10.vs.ENSG00000168763.14	-0.00951096	0.0179673	0.244578
ENSG00000158161.14.vs.ENSG00000228589.3	-0.022953	-0.329593	0.439263
ENSG00000158296.12.vs.ENSG00000149635.2	0.000976522	2.56708	0.251417
ENSG00000158315.9.vs.ENSG00000274944.3	0.000642535	-2.10011	0.59389
ENSG00000158373.8.vs.ENSG00000168298.5	0.0416603	-0.129843	0.320056
ENSG00000158417.9.vs.ENSG00000273306.1	0.00729125	0.193874	0.0669879
ENSG00000158428.3.vs.ENSG00000230580.1	-0.469264	-0.55846	0.531011
ENSG00000158516.10.vs.ENSG00000128510.9	0.127628	0.389247	0.0037152
ENSG00000158552.11.vs.ENSG00000144567.9	0.0228207	-0.0125929	0.349363
ENSG00000158604.13.vs.ENSG00000136271.9	-0.00845554	0.010181	0.377198
ENSG00000158623.13.vs.ENSG00000270823.1	0.00809375	-0.267553	0.697943
ENSG00000158710.13.vs.ENSG00000085552.15	-0.00174267	0.0192492	0.121972
ENSG00000158747.12.vs.ENSG00000158748.3	-0.00569502	-0.323119	0.315809
ENSG00000158806.12.vs.ENSG00000158815.9	0.136279	0.752005	0.0307188
ENSG00000158859.9.vs.ENSG00000158850.13	-0.0017838	-0.0113544	0.649978
ENSG00000158863.20.vs.ENSG00000158856.16	0.0133791	0.00657819	0.20536
ENSG00000158869.9.vs.ENSG00000158882.11	-0.0390988	0.0467049	0.0786936
ENSG00000158874.10.vs.ENSG00000143257.10	0.0516053	0.490258	0.0128543
ENSG00000158941.15.vs.ENSG00000120913.22	0.00932992	0.00172528	0.261897
ENSG00000159079.17.vs.ENSG00000242220.5	0.00824022	0.689059	0.562815
ENSG00000159173.17.vs.ENSG00000159166.12	0.00792615	0.00115441	0.806027
ENSG00000159189.10.vs.ENSG00000173372.15	0.00457949	-0.0130595	0.307467
ENSG00000159199.12.vs.ENSG00000270781.1	-0.00213045	-0.500086	0.295923
ENSG00000159208.14.vs.ENSG00000266472.4	0.140135	-0.00423221	0.351245
ENSG00000159231.5.vs.ENSG00000226054.2	-0.094836	0.146355	0.36411
ENSG00000159314.10.vs.ENSG00000225190.7	0.00974988	-0.0104754	0.23104
ENSG00000159346.11.vs.ENSG00000159348.11	-0.0136084	0.00461525	0.21989
ENSG00000159374.16.vs.ENSG00000115318.10	-0.00227722	-0.0208586	0.946602
ENSG00000159433.10.vs.ENSG00000260490.2	0.00890083	-1.69186	0.153823
ENSG00000159433.10.vs.ENSG00000274403.1	0.0295349	-0.719283	0.362517
ENSG00000159459.10.vs.ENSG00000205871.5	-0.0134783	-0.695994	0.0848261
ENSG00000159459.10.vs.ENSG00000254793.1	-0.00417891	-5.04211	0.546993
ENSG00000159461.13.vs.ENSG00000272372.1	-0.000171954	1.55852	0.728301
ENSG00000159593.13.vs.ENSG00000249961.8	-0.00370573	-4.27048	0.527067
ENSG00000159625.13.vs.ENSG00000140854.11	0.135386	0.00820228	0.665357
ENSG00000159625.13.vs.ENSG00000182885.15	0.322784	-0.207791	0.57609
ENSG00000159640.13.vs.ENSG00000228979.4	0.00551938	-0.364262	0.624113
ENSG00000159792.8.vs.ENSG00000038358.13	-0.03996	0.0476853	0.0342856
ENSG00000159958.4.vs.ENSG00000234965.2	-0.00862322	0.507361	0.929978
ENSG00000160051.10.vs.ENSG00000084652.14	-0.0783375	-0.00756318	0.496838
ENSG00000160087.19.vs.ENSG00000184163.3	-0.00932231	-0.0178266	0.629016
ENSG00000160094.13.vs.ENSG00000225313.4	0.0164515	-0.0189548	0.786492
ENSG00000160117.13.vs.ENSG00000130312.5	0.381403	-0.0253522	0.00390571
ENSG00000160182.2.vs.ENSG00000160183.12	-0.000266043	-0.00047148	0.92638
ENSG00000160224.15.vs.ENSG00000141959.15	0.0553031	-2.28729e-05	0.975881
ENSG00000160271.13.vs.ENSG00000148288.10	0.00160603	0.00219914	0.976931
ENSG00000160318.5.vs.ENSG00000105374.8	0.198434	-0.0893534	0.252995
ENSG00000160345.11.vs.ENSG00000226706.1	-0.511108	0.362855	0.0758647
ENSG00000160408.13.vs.ENSG00000106992.16	-0.00187637	0.0396528	0.286272
ENSG00000160471.11.vs.ENSG00000095752.5	-0.00470821	-0.158726	0.276858
ENSG00000160588.8.vs.ENSG00000160593.16	0.0169666	-0.107077	0.102822
ENSG00000160633.11.vs.ENSG00000130255.11	0.0185878	-0.00152925	0.00831761
ENSG00000160654.8.vs.ENSG00000110344.8	-0.316228	-0.0038423	0.0670122
ENSG00000160688.17.vs.ENSG00000160685.12	-0.0187423	0.00896679	0.253778
ENSG00000160688.17.vs.ENSG00000264349.1	-0.00895459	2.54968	0.094597
ENSG00000160703.14.vs.ENSG00000172367.14	0.00109375	0.022663	0.721858
ENSG00000160746.11.vs.ENSG00000234617.1	0.00962831	-0.4342	0.650183
ENSG00000160746.11.vs.ENSG00000271941.1	0.0106662	0.0628942	0.673488
ENSG00000160766.13.vs.ENSG00000177628.14	0.396009	-0.0146916	0.0581338
ENSG00000160767.19.vs.ENSG00000177628.14	-0.00666079	-0.00841013	0.627773
ENSG00000160791.13.vs.ENSG00000121807.5	-0.0114701	-0.248313	0.259295
ENSG00000160799.10.vs.ENSG00000273682.1	0.0110923	-2.39488	0.450053
ENSG00000160870.11.vs.ENSG00000106258.12	-0.167909	-0.00274862	0.771599
ENSG00000160991.14.vs.ENSG00000128563.12	-0.00181503	0.0625968	0.0336568
ENSG00000161031.11.vs.ENSG00000105122.11	-0.131947	-0.0773284	0.331754
ENSG00000161048.10.vs.ENSG00000236848.2	-0.0100812	-2.72793	0.460121
ENSG00000161180.9.vs.ENSG00000185651.13	0.0474183	-0.00104474	0.983381
ENSG00000161202.16.vs.ENSG00000161203.12	0.00721647	-0.000860405	0.510115
ENSG00000161202.16.vs.ENSG00000228205.1	0.00701485	-0.12476	0.184773
ENSG00000161203.12.vs.ENSG00000161204.10	-0.00575292	0.0414996	0.0864399
ENSG00000161249.19.vs.ENSG00000189001.9	-0.012263	-0.647059	0.530211
ENSG00000161267.10.vs.ENSG00000213519.2	-0.00356025	5.87225	0.187397
ENSG00000161281.9.vs.ENSG00000270760.1	-0.0384904	-1.70761	0.532653
ENSG00000161513.10.vs.ENSG00000172782.10	-0.00757498	-0.0469857	0.71007
ENSG00000161610.1.vs.ENSG00000089558.7	0.131028	-0.411617	0.506255
ENSG00000161642.16.vs.ENSG00000161638.9	0.00917978	-0.00141541	0.822771
ENSG00000161654.8.vs.ENSG00000221044.2	-0.0107699	0.20882	0.964253
ENSG00000161664.5.vs.ENSG00000125319.13	0.264579	0.0210967	0.491833
ENSG00000161677.10.vs.ENSG00000131409.11	-0.0124874	0.266228	0.591164
ENSG00000161798.6.vs.ENSG00000086159.11	0.0126459	-0.0668368	0.070753
ENSG00000161798.6.vs.ENSG00000167580.6	0.0112554	-0.0342557	0.0701267
ENSG00000161835.9.vs.ENSG00000123358.18	0.0180124	0.00295376	0.00739867
ENSG00000161835.9.vs.ENSG00000135503.11	0.0432777	0.011523	0.152118
ENSG00000161860.7.vs.ENSG00000179115.9	0.187958	0.000439154	0.224587
ENSG00000161888.10.vs.ENSG00000197256.9	-0.0525911	0.00065703	0.248086
ENSG00000161896.9.vs.ENSG00000137288.8	-0.44326	-0.0148968	0.430869
ENSG00000161904.10.vs.ENSG00000096395.9	0.0168718	-1.92709	0.326063
ENSG00000161912.16.vs.ENSG00000001167.13	-0.0594946	0.00695277	0.767159
ENSG00000161920.8.vs.ENSG00000141480.16	-0.0272448	-0.00493982	0.62169
ENSG00000161956.11.vs.ENSG00000129226.12	-0.0224951	-0.163047	0.53285
ENSG00000161956.11.vs.ENSG00000239697.9	-0.0221078	-0.021431	0.611738
ENSG00000161999.10.vs.ENSG00000127585.10	0.00299708	-0.0091295	0.923399
ENSG00000162032.14.vs.ENSG00000103024.6	0.304263	-0.0151321	0.412947
ENSG00000162065.10.vs.ENSG00000185883.9	0.017367	0.00380941	0.865053
ENSG00000162066.13.vs.ENSG00000279520.1	-0.0047605	0.00659914	0.970857
ENSG00000162194.11.vs.ENSG00000162191.12	-0.138193	0.00511207	0.414525
ENSG00000162194.11.vs.ENSG00000185085.2	-0.144721	-0.016902	0.323209
ENSG00000162458.11.vs.ENSG00000224321.1	0.00269258	0.0803652	0.877558
ENSG00000162460.6.vs.ENSG00000162458.11	-0.0068212	0.00310987	0.885346
ENSG00000162482.4.vs.ENSG00000211454.12	-0.0284703	-0.116515	0.030872
ENSG00000162511.7.vs.ENSG00000162510.5	-0.00449362	1.09348	0.155662
ENSG00000162571.12.vs.ENSG00000198976.1	-0.156153	0.419161	0.0631131
ENSG00000162571.12.vs.ENSG00000207607.2	-0.0591603	0.511895	0.397613
ENSG00000162571.12.vs.ENSG00000207730.2	-0.0789429	1.1147	0.253136
ENSG00000162576.15.vs.ENSG00000107404.16	0.000604401	-0.00198781	0.893146
ENSG00000162614.17.vs.ENSG00000180488.13	0.00501024	-0.0317807	0.614212
ENSG00000162645.11.vs.ENSG00000234518.2	-0.0068695	-0.0917979	0.289828
ENSG00000162650.14.vs.ENSG00000143028.8	0.108747	0.0761641	0.311563
ENSG00000162650.14.vs.ENSG00000174151.13	0.103778	0.00490339	0.317259
ENSG00000162723.8.vs.ENSG00000085552.15	-0.0124572	0.00859958	0.774507
ENSG00000162728.4.vs.ENSG00000225279.1	-0.139516	-3.78576	0.715358
ENSG00000162733.15.vs.ENSG00000132196.12	-0.0032567	0.00973914	0.807228
ENSG00000162735.17.vs.ENSG00000224261.2	-0.0159034	-2.56821	0.137525
ENSG00000162757.4.vs.ENSG00000117595.9	-0.1076	0.00498295	0.515475
ENSG00000162779.19.vs.ENSG00000057252.11	0.0117146	-0.0206219	0.316219
ENSG00000162782.14.vs.ENSG00000227141.2	0.159781	-0.163949	0.0125986
ENSG00000162881.6.vs.ENSG00000162882.13	0.0161988	-0.00671677	0.942775
ENSG00000162882.13.vs.ENSG00000226491.1	0.000997764	-0.691765	0.702491
ENSG00000162892.14.vs.ENSG00000226945.1	-0.296075	0.0351771	0.224505
ENSG00000162896.5.vs.ENSG00000162894.10	-0.000132255	-0.0764371	0.114
ENSG00000162910.17.vs.ENSG00000224566.2	-0.00755677	-0.88272	0.470876
ENSG00000162927.12.vs.ENSG00000232713.2	0.0469778	-1.39916	0.441323
ENSG00000162927.12.vs.ENSG00000237522.1	0.0168286	-0.0214849	0.904567
ENSG00000163009.7.vs.ENSG00000171848.12	0.385999	-0.0025203	0.0698607
ENSG00000163013.10.vs.ENSG00000135625.7	0.0129221	0.136313	0.608912
ENSG00000163017.12.vs.ENSG00000114956.18	0.000227916	0.00511712	0.717754
ENSG00000163050.15.vs.ENSG00000143801.15	-0.00123367	0.0200939	0.488447
ENSG00000163069.11.vs.ENSG00000188993.3	-0.00139002	-0.0219875	0.876321
ENSG00000163125.14.vs.ENSG00000117360.11	-0.00239578	0.0100047	0.71981
ENSG00000163159.10.vs.ENSG00000163155.10	0.00714517	-0.107795	0.587656
ENSG00000163221.8.vs.ENSG00000237008.2	-0.241722	-8.12376	0.437483
ENSG00000163352.5.vs.ENSG00000160685.12	-0.230857	0.00326501	0.840957
ENSG00000163382.10.vs.ENSG00000187862.10	-0.00531127	-1.38423	0.318826
ENSG00000163382.10.vs.ENSG00000280316.1	-0.00497759	-1.94141	0.426152
ENSG00000163435.14.vs.ENSG00000176393.9	0.00167344	-0.00635443	0.16591
ENSG00000163449.9.vs.ENSG00000079246.14	0.329826	0.000478031	0.676988
ENSG00000163466.14.vs.ENSG00000179921.13	-0.00300471	0.109084	0.40748
ENSG00000163497.2.vs.ENSG00000163499.10	0.387762	0.356357	0.00315193
ENSG00000163535.16.vs.ENSG00000138356.12	-0.0217169	-0.0327346	0.645354
ENSG00000163611.10.vs.ENSG00000206530.7	-0.0398656	0.0554841	0.280342
ENSG00000163684.10.vs.ENSG00000168297.14	0.00156397	-0.037421	0.689721
ENSG00000163703.16.vs.ENSG00000230082.1	0.0339973	-0.239898	0.015659
ENSG00000163735.6.vs.ENSG00000163736.3	-0.027542	-0.000254238	0.508254
ENSG00000163736.3.vs.ENSG00000163737.3	7.37489e-05	-0.0438103	0.779981
ENSG00000163738.17.vs.ENSG00000182585.8	-0.0778824	0.522956	0.152297
ENSG00000163746.10.vs.ENSG00000279320.1	-0.00878819	-0.146513	0.912264
ENSG00000163794.6.vs.ENSG00000115204.13	0.335167	-0.0120634	0.372244
ENSG00000163811.10.vs.ENSG00000189350.11	-0.00136016	-1.13657	0.404083
ENSG00000163820.13.vs.ENSG00000163818.15	-0.00238966	-0.0167233	0.740504
ENSG00000163866.8.vs.ENSG00000116544.10	-0.0234479	0.456539	0.281158
ENSG00000163898.8.vs.ENSG00000163900.9	-0.0108349	-0.0050975	0.371216
ENSG00000163939.17.vs.ENSG00000016864.15	0.00394523	-0.0127644	0.713096
ENSG00000164081.11.vs.ENSG00000164082.13	-0.00389144	-0.870641	0.613118
ENSG00000164104.10.vs.ENSG00000248774.1	-0.000685223	-0.901895	0.762148
ENSG00000164144.13.vs.ENSG00000231841.1	-0.0136479	0.418141	0.368688
ENSG00000164181.12.vs.ENSG00000250148.1	0.00426207	-0.158181	0.90517
ENSG00000164188.7.vs.ENSG00000152620.11	-1.45369	0.00378502	0.524178
ENSG00000164221.11.vs.ENSG00000243304.3	0.026109	-5.17948	0.329274
ENSG00000164237.7.vs.ENSG00000271980.1	-0.00495602	0.461674	0.509897
ENSG00000164299.6.vs.ENSG00000244076.1	-0.47023	-3.80028	0.464565
ENSG00000164329.12.vs.ENSG00000164309.13	-0.00376931	0.202573	0.545975
ENSG00000164344.14.vs.ENSG00000088926.12	-0.343149	0.470832	0.00395922
ENSG00000164434.10.vs.ENSG00000172594.11	-0.324659	-0.0202143	0.5341
ENSG00000164535.13.vs.ENSG00000231359.3	-0.013483	1.92823	0.0925543
ENSG00000164591.12.vs.ENSG00000171992.11	-0.291938	0.000887283	0.933436
ENSG00000164597.12.vs.ENSG00000272072.1	-0.015735	-0.0944144	0.438058
ENSG00000164647.7.vs.ENSG00000157214.12	-0.00537489	-0.0221844	0.336495
ENSG00000164663.12.vs.ENSG00000137218.9	-0.00353005	0.047004	0.388778
ENSG00000164675.9.vs.ENSG00000128609.13	-0.993275	-0.00312338	0.608696
ENSG00000164850.13.vs.ENSG00000224079.1	-0.0475939	-1.21984	0.700914
ENSG00000164889.11.vs.ENSG00000133612.17	0.00262718	-8.33608e-05	0.779768
ENSG00000164889.11.vs.ENSG00000197150.11	0.00455723	-0.00790203	0.636043
ENSG00000164889.11.vs.ENSG00000213199.6	0.00317183	-0.147509	0.643413
ENSG00000164897.11.vs.ENSG00000244151.1	-0.0129652	0.683777	0.0922369
ENSG00000164902.12.vs.ENSG00000196900.4	0.0175	0.300053	0.309461
ENSG00000164916.10.vs.ENSG00000242802.5	-0.00549739	0.00505053	0.714403
ENSG00000164941.12.vs.ENSG00000243979.2	0.00446661	-6.65161	0.450979
ENSG00000164941.12.vs.ENSG00000272509.1	0.00451608	-0.515315	0.833547
ENSG00000164951.14.vs.ENSG00000254387.1	-0.0175131	-5.53393	0.168443
ENSG00000164967.8.vs.ENSG00000137100.14	0.0142341	-0.0221068	0.360014
ENSG00000164967.8.vs.ENSG00000205143.2	-0.0116672	0.0875203	0.671734
ENSG00000164976.8.vs.ENSG00000164972.11	0.00976856	-0.366782	0.0851421
ENSG00000165028.10.vs.ENSG00000136783.9	0.225997	-0.0275153	0.225514
ENSG00000165066.12.vs.ENSG00000029534.18	-1.23954	0.0239353	0.636755
ENSG00000165071.13.vs.ENSG00000129295.7	-0.0189335	-0.0354885	0.613985
ENSG00000165140.8.vs.ENSG00000130957.4	0.0020808	-0.121035	0.891798
ENSG00000165240.16.vs.ENSG00000131174.4	-0.00303615	-0.00190401	0.722475
ENSG00000165275.8.vs.ENSG00000070601.8	0.103778	0.0174278	0.282902
ENSG00000165406.14.vs.ENSG00000231964.1	-0.0232053	0.121255	0.479402
ENSG00000165458.12.vs.ENSG00000165457.12	0.00990249	-0.0279684	0.2289
ENSG00000165556.9.vs.ENSG00000183463.5	-0.00156345	-0.0125355	0.46089
ENSG00000165650.10.vs.ENSG00000277879.1	-0.00374219	-0.0167417	0.686153
ENSG00000165684.3.vs.ENSG00000187796.12	0.0200976	-0.00701413	0.522038
ENSG00000165704.13.vs.ENSG00000226107.1	0.00799858	-0.859517	0.593449
ENSG00000165802.18.vs.ENSG00000188833.8	0.00204412	0.00535878	0.12105
ENSG00000165816.11.vs.ENSG00000095627.8	0.0143614	0.0416591	0.028449
ENSG00000165821.10.vs.ENSG00000165819.10	0.0777459	0.0229561	0.540355
ENSG00000165912.14.vs.ENSG00000243802.2	0.0209482	-0.32871	0.0882514
ENSG00000165916.7.vs.ENSG00000255197.4	0.000349343	-0.525732	0.789185
ENSG00000165923.14.vs.ENSG00000109920.11	0.102735	0.0275254	0.00464776
ENSG00000165929.11.vs.ENSG00000140092.13	-0.00915452	-0.000309603	0.343991
ENSG00000166197.15.vs.ENSG00000148840.9	-0.00227186	0.00746274	0.761043
ENSG00000166250.10.vs.ENSG00000109971.12	-0.0381816	-0.000570566	0.143437
ENSG00000166323.11.vs.ENSG00000178202.11	-0.221504	0.00488263	0.766846
ENSG00000166337.8.vs.ENSG00000166341.7	0.000632762	0.0115557	0.142045
ENSG00000166343.8.vs.ENSG00000138279.14	0.568978	-0.00330748	0.0725352
ENSG00000166529.13.vs.ENSG00000106261.15	0.0651819	0.0032944	0.24032
ENSG00000166557.11.vs.ENSG00000169330.7	-0.00335858	-0.0716116	0.648455
ENSG00000166592.10.vs.ENSG00000166589.11	-0.00608024	0.00792167	0.735688
ENSG00000166670.8.vs.ENSG00000196611.4	-0.0282062	-0.00370282	0.230268
ENSG00000166747.11.vs.ENSG00000040199.17	0.000620866	-0.0114551	0.914807
ENSG00000166794.4.vs.ENSG00000169118.14	0.00161046	-0.0264337	0.387944
ENSG00000166796.10.vs.ENSG00000166800.8	0.209849	-0.176155	0.434459
ENSG00000166813.13.vs.ENSG00000166819.10	0.0738216	0.00780189	0.282452
ENSG00000166819.10.vs.ENSG00000241362.2	0.0127419	0.600308	0.354561
ENSG00000166822.11.vs.ENSG00000183196.7	-0.00760694	0.00168861	0.905208
ENSG00000166863.10.vs.ENSG00000166860.2	-0.107178	0.0359707	0.700103
ENSG00000166896.6.vs.ENSG00000257159.1	-0.0679242	-2.76504	0.532493
ENSG00000166908.16.vs.ENSG00000155980.10	0.00191779	0.220214	0.224441
ENSG00000166908.16.vs.ENSG00000178498.14	0.00537828	0.0668132	0.0476899
ENSG00000166908.16.vs.ENSG00000240771.5	0.00528456	0.0184977	0.72364
ENSG00000166912.15.vs.ENSG00000134160.12	-0.0188808	-0.400087	0.743428
ENSG00000166971.15.vs.ENSG00000279344.1	0.0338459	-0.52163	0.581976
ENSG00000166971.15.vs.ENSG00000279722.1	0.0371838	-0.0857697	0.679424
ENSG00000166986.11.vs.ENSG00000111087.8	0.000123795	0.0119124	0.980642
ENSG00000167074.13.vs.ENSG00000100403.11	0.00504608	0.00069811	0.971631
ENSG00000167077.11.vs.ENSG00000100147.12	0.0996225	-0.221585	0.149485
ENSG00000167085.10.vs.ENSG00000229944.3	0.00150123	-0.924796	0.330315
ENSG00000167100.13.vs.ENSG00000108819.10	0.103842	0.00285531	0.339088
ENSG00000167100.13.vs.ENSG00000250282.1	0.108264	0.759346	0.244308
ENSG00000167103.10.vs.ENSG00000167106.10	0.177749	0.00294835	0.714021
ENSG00000167107.11.vs.ENSG00000136444.8	-0.0126146	0.0285568	0.358712
ENSG00000167118.9.vs.ENSG00000167114.11	0.00295546	-0.00946736	0.528041
ENSG00000167123.17.vs.ENSG00000228510.2	-0.000994774	-3.97958	0.744079
ENSG00000167130.16.vs.ENSG00000148343.17	-0.0146361	0.0267	0.363783
ENSG00000167136.6.vs.ENSG00000107021.14	-0.0335157	0.0183102	0.381421
ENSG00000167216.15.vs.ENSG00000267724.1	-0.0250092	-1.20599	0.708237
ENSG00000167220.10.vs.ENSG00000134049.4	-0.0310406	-0.00634814	0.581102
ENSG00000167264.16.vs.ENSG00000072736.17	-0.0189986	-0.0273621	0.538805
ENSG00000167355.6.vs.ENSG00000175518.6	0.192851	2.07999	0.198521
ENSG00000167371.15.vs.ENSG00000079616.11	-0.0293653	0.00962278	0.394358
ENSG00000167371.15.vs.ENSG00000281348.1	-0.0745488	4.27762	0.374407
ENSG00000167384.9.vs.ENSG00000273777.3	-0.0659086	-1.95094	0.462602
ENSG00000167397.13.vs.ENSG00000151006.7	0.021173	0.505759	0.0271515
ENSG00000167414.4.vs.ENSG00000160013.7	4.01226	-0.0956107	0.221418
ENSG00000167414.4.vs.ENSG00000279161.1	3.48385	-3.42904	0.286786
ENSG00000167460.13.vs.ENSG00000167461.10	-0.000476834	-0.00722154	0.75193
ENSG00000167470.11.vs.ENSG00000099624.6	0.00416408	-0.00507467	0.138289
ENSG00000167483.16.vs.ENSG00000130309.9	0.0416855	-0.00484917	0.438332
ENSG00000167536.12.vs.ENSG00000109118.12	-0.103051	0.015541	0.299583
ENSG00000167548.13.vs.ENSG00000167550.9	0.00110564	-0.153588	0.535199
ENSG00000167554.13.vs.ENSG00000221923.7	0.193515	-0.0895492	0.540006
ENSG00000167612.11.vs.ENSG00000258021.1	0.196565	-0.381492	0.768199
ENSG00000167614.12.vs.ENSG00000235681.1	-0.0391142	-0.0709589	0.911723
ENSG00000167619.10.vs.ENSG00000188368.8	-0.0255243	-0.11034	0.878386
ENSG00000167654.16.vs.ENSG00000077009.12	0.561637	-4.22507	0.791429
ENSG00000167654.16.vs.ENSG00000266989.1	0.921786	-9.53871	0.309172
ENSG00000167656.4.vs.ENSG00000180155.17	-0.191253	-0.0131713	0.838829
ENSG00000167657.10.vs.ENSG00000167658.14	0.00655514	-0.000109983	0.723446
ENSG00000167670.14.vs.ENSG00000267769.1	-0.00273263	1.05815	0.553803
ENSG00000167670.14.vs.ENSG00000280239.1	-0.00207707	0.193739	0.837449
ENSG00000167676.3.vs.ENSG00000214456.7	0.00560733	-0.00600157	0.440549
ENSG00000167680.14.vs.ENSG00000171236.9	-0.00384304	-0.0213066	0.100681
ENSG00000167680.14.vs.ENSG00000214456.7	-0.00737416	0.0193915	0.945764
ENSG00000167680.14.vs.ENSG00000267385.1	-0.0072631	-0.850497	0.887359
ENSG00000167693.15.vs.ENSG00000262434.1	-0.0112044	-1.09431	0.712065
ENSG00000167699.12.vs.ENSG00000262434.1	-0.00460664	-1.10855	0.743849
ENSG00000167700.7.vs.ENSG00000160972.8	0.00163618	-0.00316459	0.930484
ENSG00000167700.7.vs.ENSG00000265393.1	0.00288115	-0.625374	0.745608
ENSG00000167701.12.vs.ENSG00000167700.7	-0.00336466	-0.00109354	0.953909
ENSG00000167701.12.vs.ENSG00000265393.1	0.000909376	-0.528404	0.761637
ENSG00000167703.13.vs.ENSG00000174238.13	0.00974556	-0.00163406	0.544227
ENSG00000167711.12.vs.ENSG00000132386.9	0.0349102	-0.00141071	0.158613
ENSG00000167741.9.vs.ENSG00000132382.13	-0.00606365	0.00540133	0.292087
ENSG00000167754.11.vs.ENSG00000167755.12	-0.31871	0.00715857	0.0167145
ENSG00000167757.12.vs.ENSG00000129451.10	-0.0177256	0.00308447	0.372193
ENSG00000167757.12.vs.ENSG00000186474.14	0.00473232	-0.0533983	0.39455
ENSG00000167770.10.vs.ENSG00000176340.3	0.0136672	-0.00923917	0.0662242
ENSG00000167778.7.vs.ENSG00000257337.5	8.89799e-05	-0.0193373	0.976356
ENSG00000167780.10.vs.ENSG00000167779.6	0.350388	-0.0318082	0.0149352
ENSG00000167800.9.vs.ENSG00000132744.6	0.0243747	-0.000163754	0.538428
ENSG00000167800.9.vs.ENSG00000167799.8	0.0372178	-0.0311584	0.188976
ENSG00000167874.6.vs.ENSG00000280046.1	-0.00128207	-0.133535	0.829862
ENSG00000167895.13.vs.ENSG00000187997.10	0.018859	-0.378317	0.558499
ENSG00000167914.9.vs.ENSG00000108344.13	0.00886865	0.00121106	0.0895953
ENSG00000167925.14.vs.ENSG00000089558.7	0.0145713	-0.580985	0.117034
ENSG00000167925.14.vs.ENSG00000161610.1	0.0126021	-1.49221	0.315492
ENSG00000167925.14.vs.ENSG00000173757.8	0.00577333	0.0074645	0.501319
ENSG00000167967.14.vs.ENSG00000261663.1	-0.000564605	0.555278	0.370638
ENSG00000167968.11.vs.ENSG00000261663.1	-0.0211134	0.565355	0.370917
ENSG00000167992.11.vs.ENSG00000167986.12	0.116713	-0.00205015	0.071639
ENSG00000167994.10.vs.ENSG00000221968.7	-0.0243474	0.0188991	0.764147
ENSG00000168016.12.vs.ENSG00000281100.1	0.00851286	-0.449637	0.84553
ENSG00000168028.12.vs.ENSG00000144659.9	-0.000489268	-0.00471138	0.42945
ENSG00000168071.20.vs.ENSG00000162302.11	0.00394294	-0.00224452	0.144095
ENSG00000168228.13.vs.ENSG00000053900.9	-0.177108	0.0459262	0.246344
ENSG00000168234.11.vs.ENSG00000154040.19	-0.164177	0.134356	0.0327456
ENSG00000168255.17.vs.ENSG00000105808.16	0.0435384	0.444355	0.251934
ENSG00000168259.13.vs.ENSG00000187595.13	0.018454	0.107812	0.0645641
ENSG00000168273.6.vs.ENSG00000010327.9	-0.0260221	-0.00302241	0.577052
ENSG00000168297.14.vs.ENSG00000272182.1	-0.0394812	0.565734	0.661072
ENSG00000168309.15.vs.ENSG00000198643.5	-0.00148866	-0.00155227	0.484898
ENSG00000168395.13.vs.ENSG00000228989.1	0.0343	-0.028171	0.345277
ENSG00000168439.15.vs.ENSG00000149781.11	0.00307447	-0.00546643	0.507442
ENSG00000168453.13.vs.ENSG00000168476.10	0.0110873	-0.0196592	0.111797
ENSG00000168453.13.vs.ENSG00000275074.1	0.00697985	-0.026966	0.299545
ENSG00000168703.5.vs.ENSG00000175121.10	-0.500629	-1.5252	0.817729
ENSG00000168758.9.vs.ENSG00000163126.13	0.0119378	0.51531	0.0616114
ENSG00000168758.9.vs.ENSG00000168754.12	0.0181611	-0.0891844	0.148016
ENSG00000168758.9.vs.ENSG00000213337.7	0.0153462	-0.00419475	0.163129
ENSG00000168765.14.vs.ENSG00000235045.2	-0.0101075	-0.788944	0.590291
ENSG00000168778.10.vs.ENSG00000185344.12	-0.0344646	-0.0491196	0.235062
ENSG00000168792.4.vs.ENSG00000108262.14	-0.00714138	-0.000213094	0.962599
ENSG00000168894.8.vs.ENSG00000168899.4	0.00921706	-0.0399112	0.424484
ENSG00000168918.12.vs.ENSG00000085978.20	0.00825253	-0.00724637	0.398454
ENSG00000168993.13.vs.ENSG00000249592.4	0.0294158	0.224458	0.131107
ENSG00000169035.10.vs.ENSG00000167755.12	-0.0121336	0.00543532	0.199974
ENSG00000169057.18.vs.ENSG00000184216.10	0.0140365	0.000283925	0.391433
ENSG00000169062.13.vs.ENSG00000130177.13	0.0197529	0.00465848	0.0818313
ENSG00000169105.7.vs.ENSG00000140320.10	0.0149779	0.00898153	0.724472
ENSG00000169249.11.vs.ENSG00000169239.11	0.0863193	-0.162838	0.0779053
ENSG00000169299.12.vs.ENSG00000239532.1	-0.0188813	-1.44392	0.336645
ENSG00000169299.12.vs.ENSG00000249863.2	-0.0118746	-0.784437	0.139828
ENSG00000169313.9.vs.ENSG00000181631.6	1.49272	-0.684317	0.0624537
ENSG00000169375.14.vs.ENSG00000169410.8	-0.0177283	0.0049696	0.536916
[truncated: 2,310 more rows]

## Sheet: BG.DFI.HNSC
Gene	Coefficient1	Coefficient2	Logrank p-value
[truncated: 3,541 more rows]

[truncated: 35 more sheets: BG.DFI.KIRC, BG.DFI.KIRP, BG.DFI.LIHC, BG.DFI.LUAD, BG.DFI.LUSC, BG.DFI.PRAD, BG.DFI.STAD, BG.DFI.THCA, BG.DFI.UCEC, BG.OS.BLCA, BG.OS.BRCA, BG.OS.COAD, BG.OS.HNSC, BG.OS.KIRC, BG.OS.KIRP, BG.OS.LIHC, BG.OS.LUAD, BG.OS.LUSC, BG.OS.PRAD, BG.OS.STAD …]
