# Supplementary material for: Characterization of bidirectional gene pairs in The Cancer Genome Atlas (TCGA) dataset
Source: PeerJ journal article supplement (doi:10.7717/peerj.7107), 2019-06-17
Supplement: Table_S3.pdf [file Table_S3.pdf]

**Table S3. Summary of the number of prognostic genes in each of the 13 analyzed TCGA datasets.**

| Dataset | OS    |       |     |       |       |       |           |           | DFI   |       |     |       |       |       |           |           | PFI   |       |     |       |       |       |           |           |
|---------|-------|-------|-----|-------|-------|-------|-----------|-----------|-------|-------|-----|-------|-------|-------|-----------|-----------|-------|-------|-----|-------|-------|-------|-----------|-----------|
|         | BG    |       | CG1 |       | CG2   |       | p-value   |           | BG    |       | CG1 |       | CG2   |       | p-value   |           | BG    |       | CG1 |       | CG2   |       | p-value   |           |
|         | PG    | NPG   | PG  | NPG   | PG    | NPG   | BG.vs.CG1 | BG.vs.CG2 | PG    | NPG   | PG  | NPG   | PG    | NPG   | BG.vs.CG1 | BG.vs.CG2 | PG    | NPG   | PG  | NPG   | PG    | NPG   | BG.vs.CG1 | BG.vs.CG2 |
| BLCA    | 1,326 | 5,111 | 324 | 1,186 | 1,842 | 7,127 | 4.81E-01  | 9.41E-01  | 718   | 5,719 | 155 | 1,355 | 1,091 | 7,878 | 3.43E-01  | 5.81E-02  | 1,332 | 5,105 | 319 | 1,191 | 1,787 | 7,182 | 7.35E-01  | 2.50E-01  |
| BRCA    | 752   | 5,443 | 173 | 1,249 | 942   | 7,152 | 1.00E+00  | 3.73E-01  | 669   | 5,526 | 179 | 1,243 | 869   | 7,225 | 5.91E-02  | 9.26E-01  | 632   | 5,563 | 178 | 1,244 | 910   | 7,184 | 1.22E-02  | 4.99E-02  |
| COAD    | 659   | 5,461 | 151 | 1,271 | 821   | 7,471 | 9.08E-01  | 9.56E-02  | 369   | 5,751 | 120 | 1,302 | 533   | 7,759 | 1.10E-03  | 3.47E-01  | 736   | 5,384 | 192 | 1,230 | 983   | 7,309 | 1.38E-01  | 7.74E-01  |
| HNSC    | 933   | 5,115 | 202 | 1,179 | 1,193 | 6,692 | 4.82E-01  | 6.46E-01  | 199   | 5,849 | 73  | 1,308 | 414   | 7,471 | 4.95E-04  | 2.86E-08  | 853   | 5,195 | 173 | 1,208 | 976   | 6,909 | 1.36E-01  | 3.03E-03  |
| KIRC    | 2,933 | 3,161 | 680 | 729   | 3,448 | 4,479 | 9.52E-01  | 5.24E-08  | 315   | 5,779 | 77  | 1,332 | 490   | 7,437 | 7.01E-01  | 1.18E-02  | 2,706 | 3,388 | 589 | 820   | 3,103 | 4,824 | 8.12E-02  | 4.11E-10  |
| KIRP    | 1,758 | 4,386 | 378 | 1,032 | 2,036 | 5,872 | 1.85E-01  | 1.58E-04  | 1,088 | 5,056 | 266 | 1,144 | 1,432 | 6,476 | 3.26E-01  | 5.55E-01  | 1,781 | 4,363 | 395 | 1,015 | 2,111 | 5,797 | 4.87E-01  | 2.75E-03  |
| LIHC    | 1,082 | 4,688 | 194 | 1,118 | 1,161 | 5,842 | 8.57E-04  | 1.42E-03  | 895   | 4,875 | 167 | 1,145 | 966   | 6,037 | 1.22E-02  | 6.68E-03  | 972   | 4,798 | 166 | 1,146 | 1,041 | 5,962 | 2.23E-04  | 2.42E-03  |
| LUAD    | 1,178 | 5,044 | 282 | 1,165 | 1,411 | 7,010 | 6.54E-01  | 6.95E-04  | 325   | 5,897 | 75  | 1,372 | 512   | 7,909 | 1.00E+00  | 2.99E-02  | 804   | 5,418 | 167 | 1,280 | 979   | 7,442 | 1.68E-01  | 1.90E-02  |
| LUSC    | 304   | 5,990 | 92  | 1,357 | 557   | 7,972 | 2.14E-02  | 1.43E-05  | 420   | 5,874 | 92  | 1,357 | 549   | 7,980 | 6.98E-01  | 5.88E-01  | 763   | 5,531 | 179 | 1,270 | 916   | 7,613 | 8.43E-01  | 9.33E-03  |
| PRAD    | 508   | 5,633 | 120 | 1,289 | 695   | 7,078 | 8.06E-01  | 1.73E-01  | 1,120 | 5,021 | 266 | 1,143 | 1,315 | 6,458 | 6.02E-01  | 4.41E-02  | 1,526 | 4,615 | 358 | 1,051 | 1,924 | 5,849 | 6.87E-01  | 9.11E-01  |
| STAD    | 500   | 6,085 | 119 | 1,446 | 783   | 9,088 | 1.00E+00  | 4.44E-01  | 1,326 | 5,259 | 276 | 1,289 | 1,639 | 8,232 | 2.76E-02  | 8.62E-09  | 1,166 | 5,419 | 259 | 1,306 | 1,445 | 8,426 | 2.95E-01  | 1.47E-07  |
| THCA    | 656   | 5,335 | 143 | 1,226 | 847   | 6,684 | 6.22E-01  | 6.04E-01  | 520   | 5,471 | 108 | 1,261 | 620   | 6,911 | 3.73E-01  | 3.69E-01  | 652   | 5,339 | 153 | 1,216 | 795   | 6,736 | 7.91E-01  | 5.60E-01  |
| UCEC    | 1,281 | 5,262 | 305 | 1,235 | 1,683 | 7,615 | 8.68E-01  | 2.00E-02  | 898   | 5,645 | 200 | 1,340 | 1,292 | 8,006 | 4.72E-01  | 7.77E-01  | 1,669 | 4,874 | 358 | 1,182 | 1,945 | 7,353 | 7.04E-02  | 1.39E-11  |

PG: prognostic gene  
 NPG: non-prognostic gene
